# Supplementary material for: Genome-wide association analysis identifies common variants influencing infant brain volumes
Source: PubMed Central journal article supplement — Transl Psychiatry. 2017 Aug 1;7(8):e1188–. doi: 10.1038/tp.2017.159 (PMC5611727; doi:10.1038/tp.2017.159), 2017-08-01

**KLF13 (P=9e-04, Diff = -5.4)**  
**amygdaloid complex**

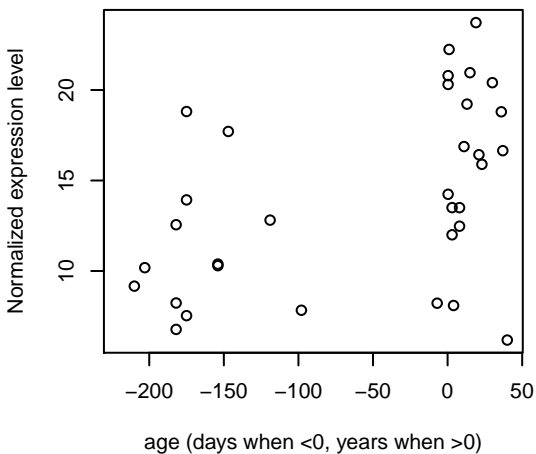

**KLF13 (P=0.0256, Diff = -4.29)**  
**anterior cingulate cortex**

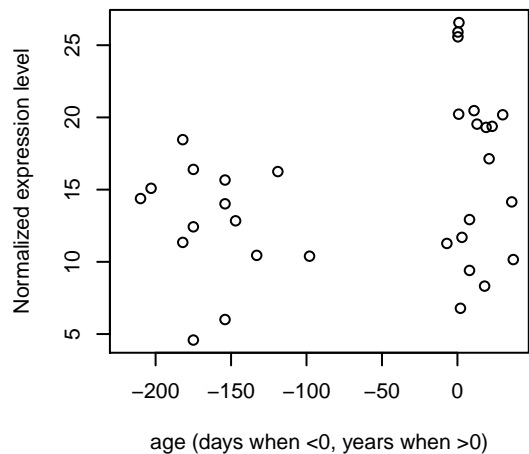

**KLF13 (P=0, Diff = -26.61)**  
**cerebellar cortex**

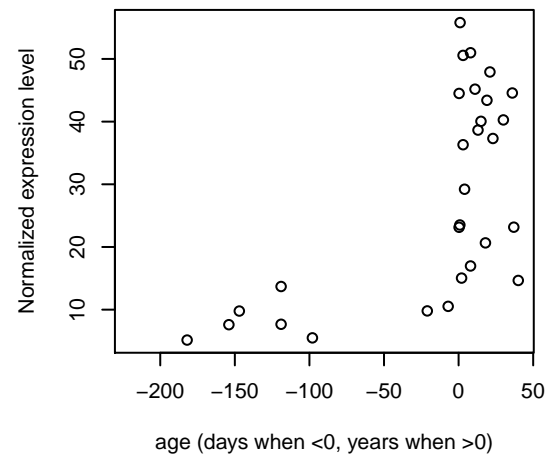

**KLF13 (P=0.0016, Diff = -5.93)**  
**dorsolateral prefrontal cortex**

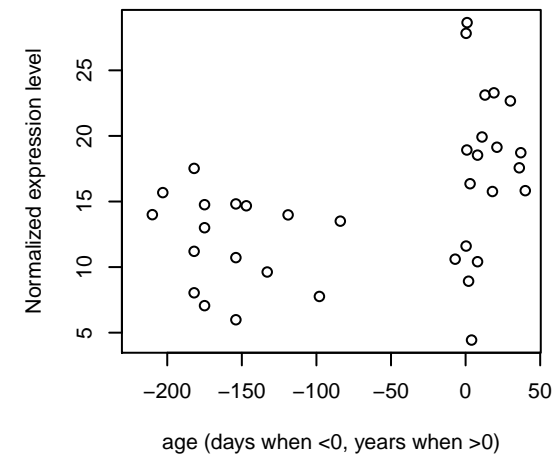

**KLF13 (P=0.0326, Diff = -3.5)**  
**hippocampus**

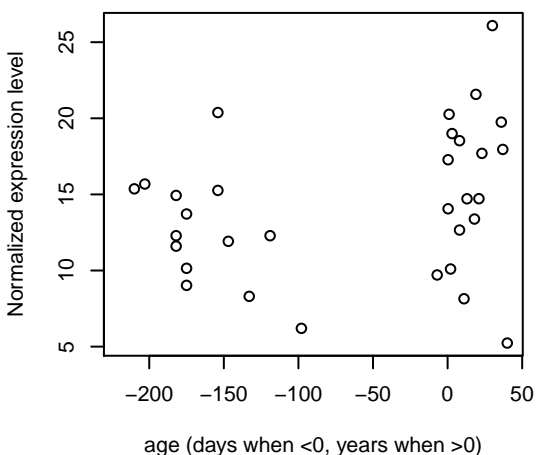

**KLF13 (P=1e-04, Diff = -7.02)**  
**inferolateral temporal cortex**

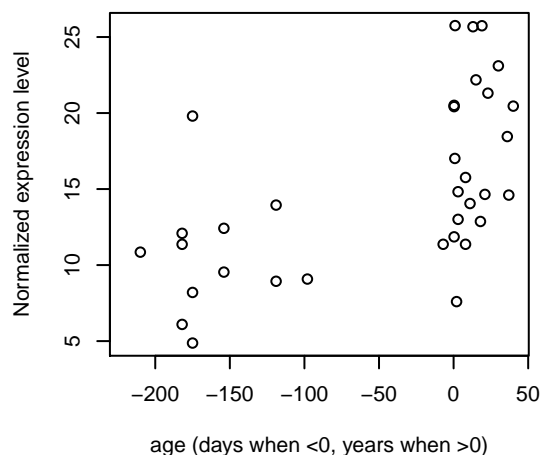

**KLF13 (P=0, Diff = -8.95)**  
**mediodorsal nucleus of thalamus**

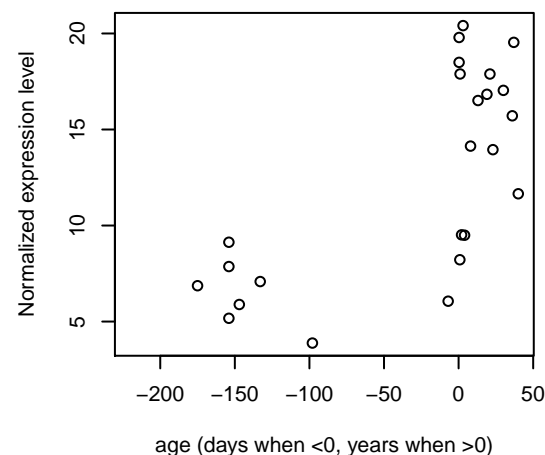

**KLF13 (P=0, Diff = -7.94)**  
**orbital frontal cortex**

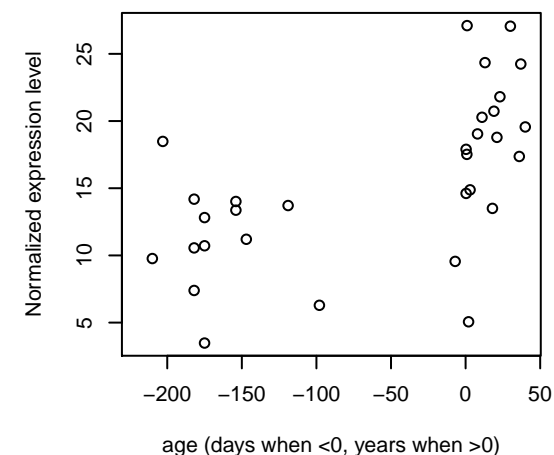

**KLF13 (P=2e-04, Diff = -6.12)**  
**posterior superior temporal cortex**

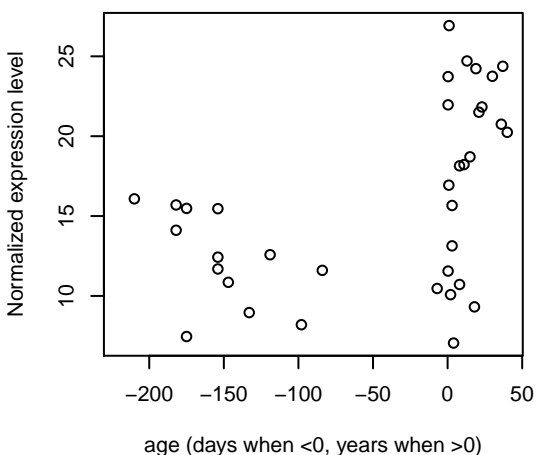

**KLF13 (P=2e-04, Diff = -6.39)**  
**posteroventral parietal cortex**

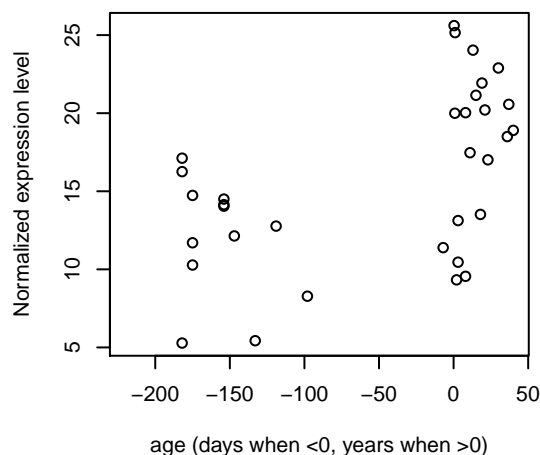

**KLF13 (P=0, Diff = -7.96)**  
**primary auditory cortex**

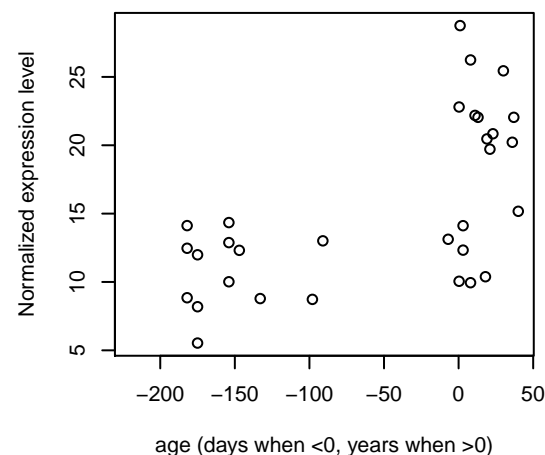

**KLF13 (P=0.0322, Diff = -4.59)**  
**primary motor cortex**

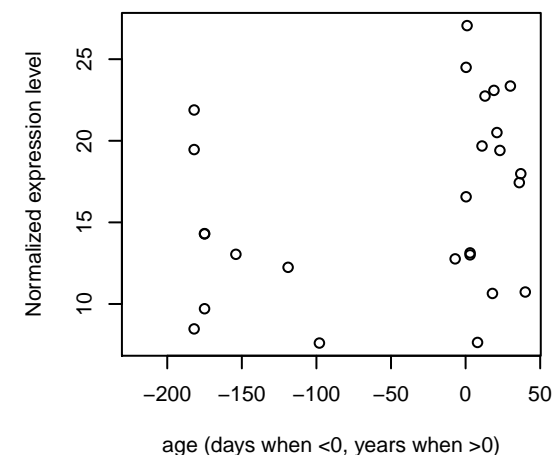

**KLF13 (P=0.0091, Diff = -5.3)**  
**primary somatosensory cortex**

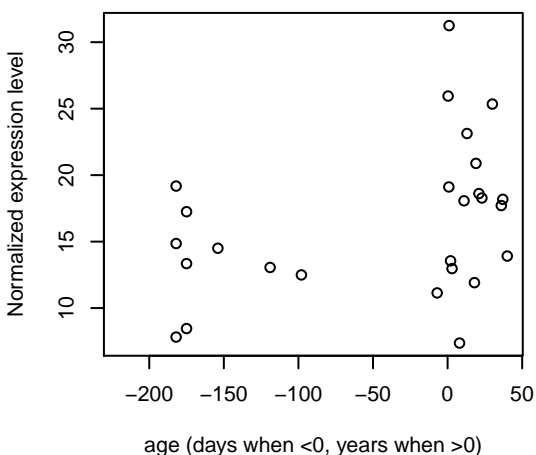

**KLF13 (P=0.0692, Diff = -4.71)**  
**primary visual cortex**

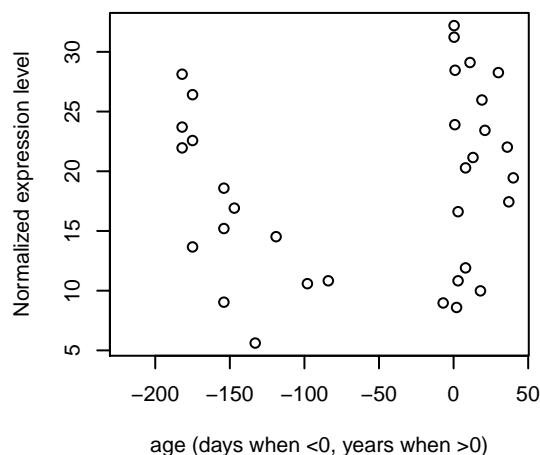

**KLF13 (P=0, Diff = -7.13)**  
**striatum**

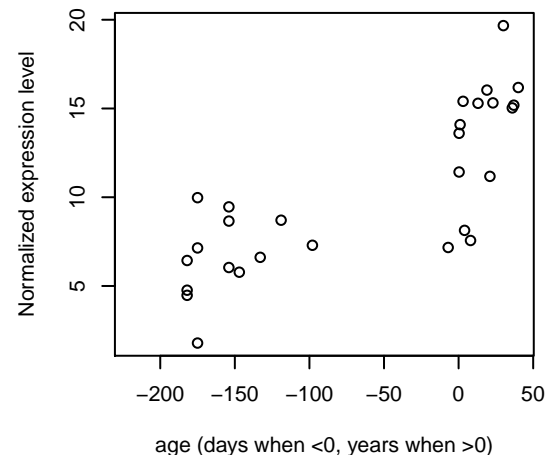

**KLF13 (P=0, Diff = -0.42)**  
**prefrontal cortex**

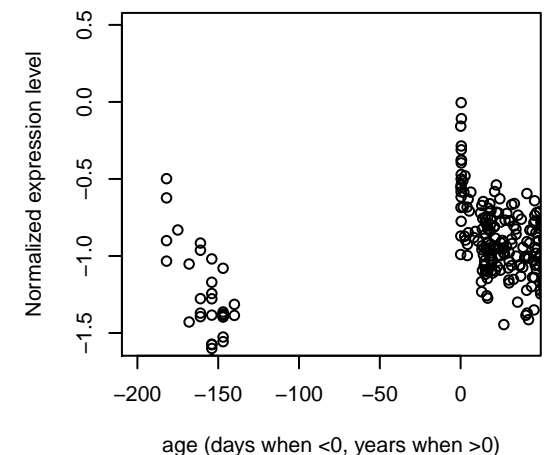

**EYA2 (P=0.3953, Diff = -0.36)**  
**amygdaloid complex**

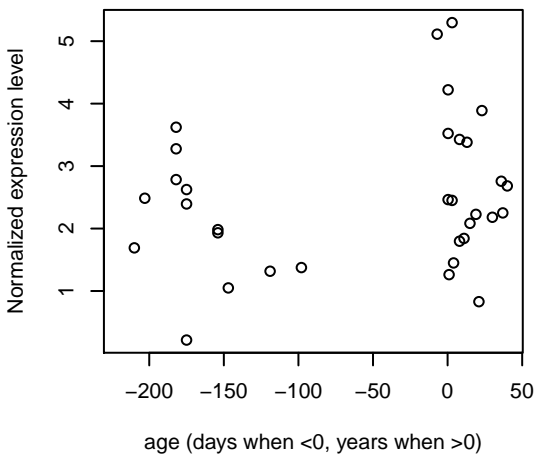

**EYA2 (P=0.0624, Diff = -1.11)**  
**anterior cingulate cortex**

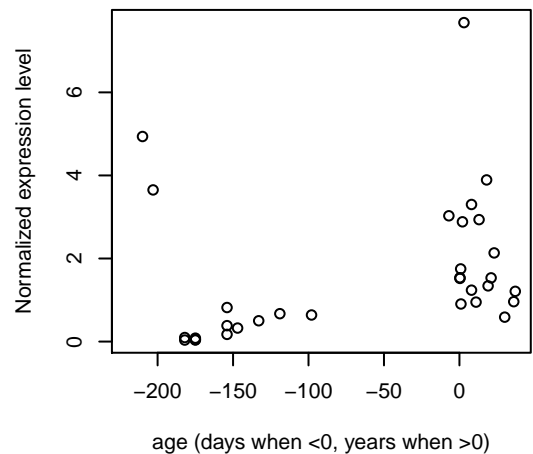

**EYA2 (P=2e-04, Diff = 5.62)**  
**cerebellar cortex**

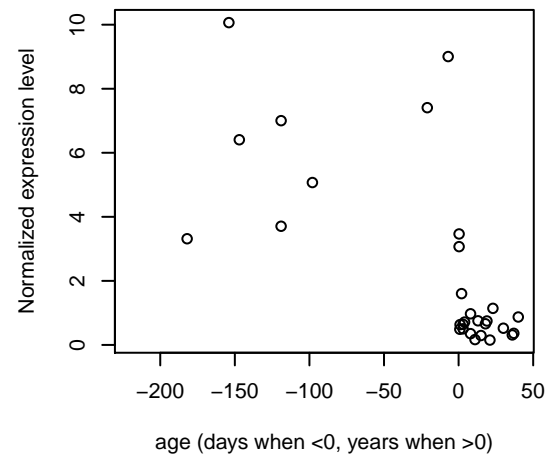

**EYA2 (P=0.2634, Diff = -0.69)**  
**dorsolateral prefrontal cortex**

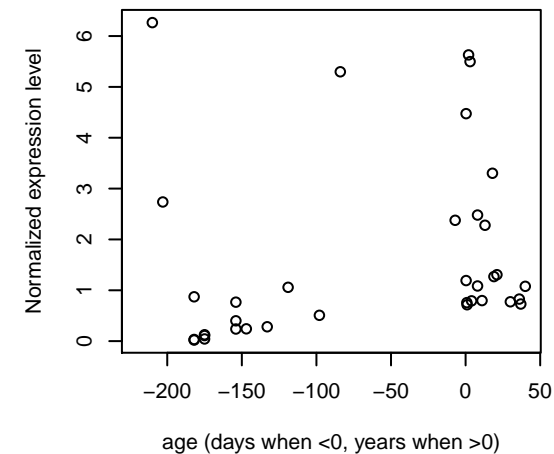

**EYA2 (P=0.6943, Diff = -0.24)**  
**hippocampus**

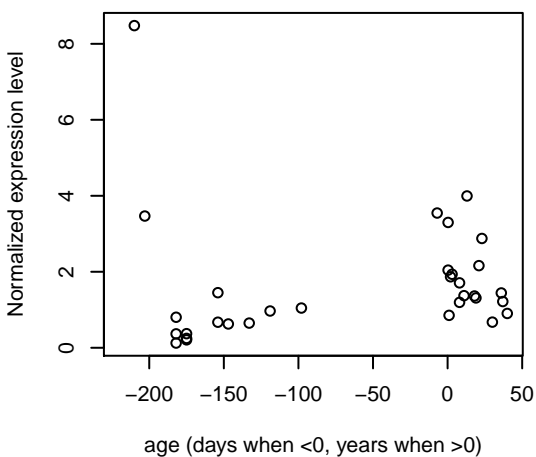

**EYA2 (P=0.0018, Diff = -1.65)**  
**inferolateral temporal cortex**

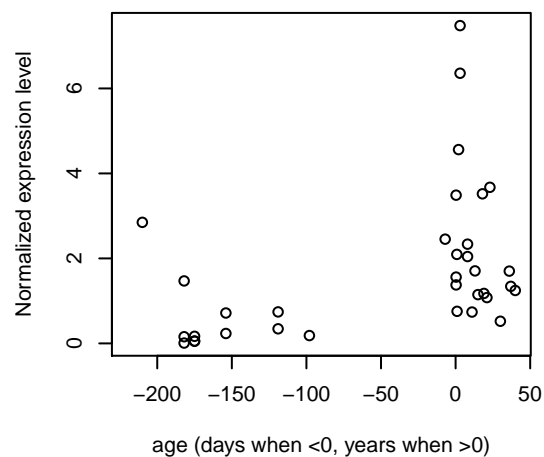

**EYA2 (P=0.2663, Diff = -0.9)**  
**mediodorsal nucleus of thalamus**

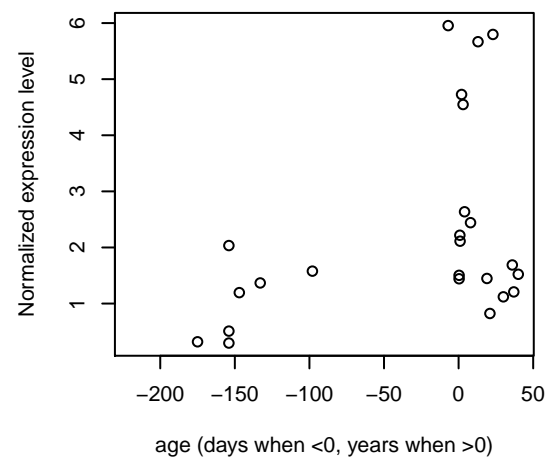

**EYA2 (P=0.2398, Diff = -0.83)**  
**orbital frontal cortex**

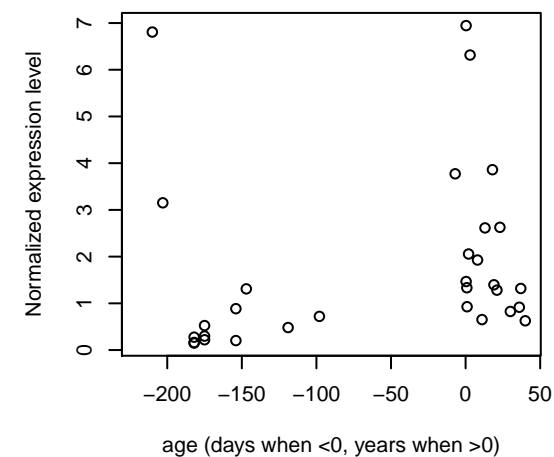

**EYA2 (P=0.0419, Diff = -1.09)**  
**posterior superior temporal cortex**

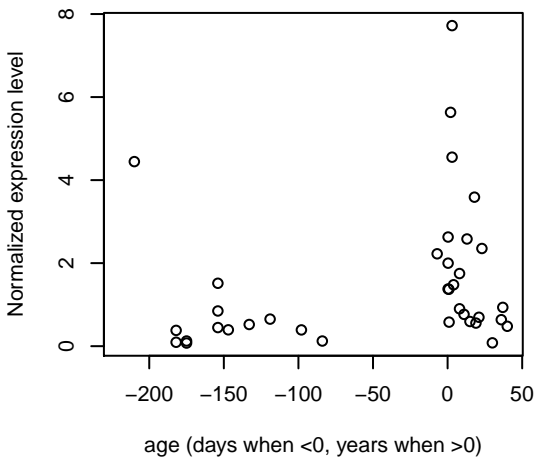

**EYA2 (P=0.0038, Diff = -1.59)**  
**posteroventral parietal cortex**

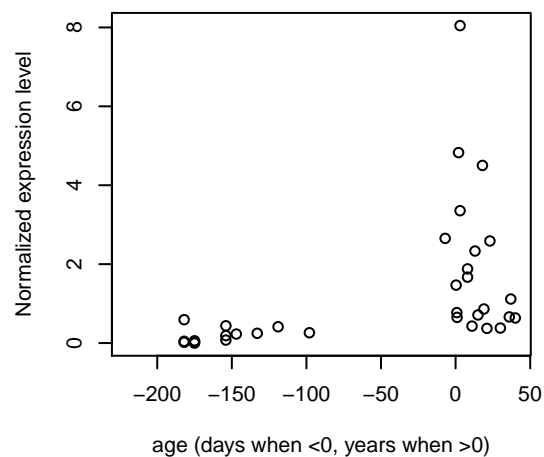

**EYA2 (P=0.191, Diff = -0.94)**  
**primary auditory cortex**

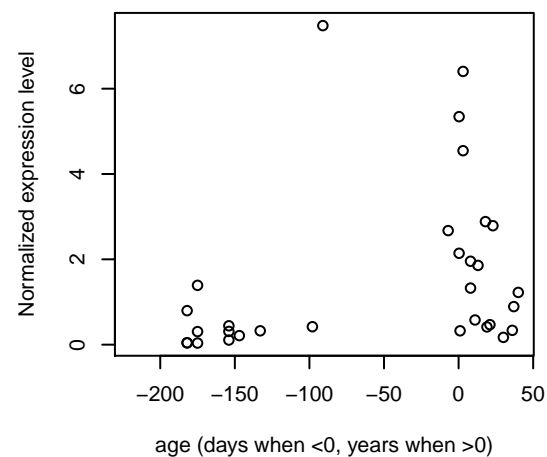

**EYA2 (P=0.0748, Diff = -1.43)**  
**primary motor cortex**

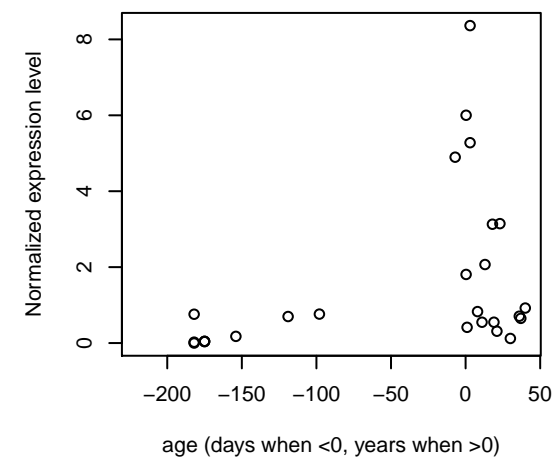

**EYA2 (P=0.0515, Diff = -1.19)**  
**primary somatosensory cortex**

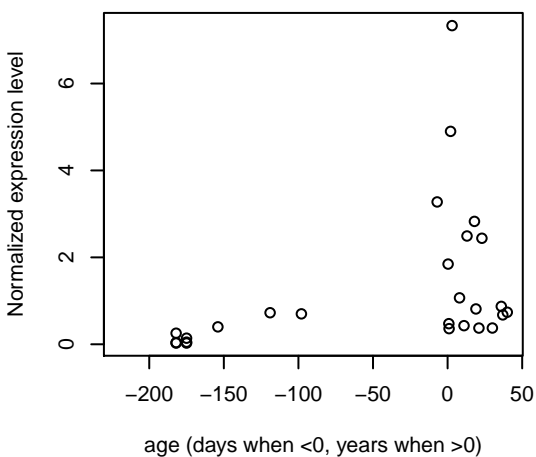

**EYA2 (P=0.1689, Diff = -0.81)**  
**primary visual cortex**

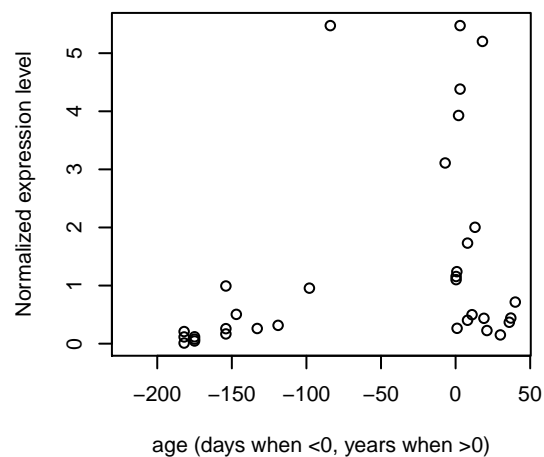

**EYA2 (P=0.3043, Diff = 0.46)**  
**striatum**

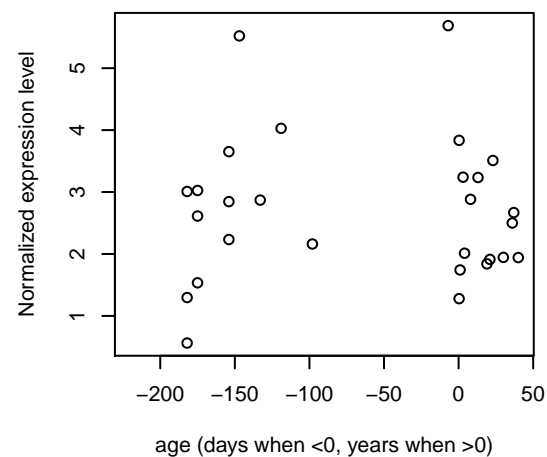

**EYA2 (P=0.8348, Diff = -0.01)**  
**prefrontal cortex**

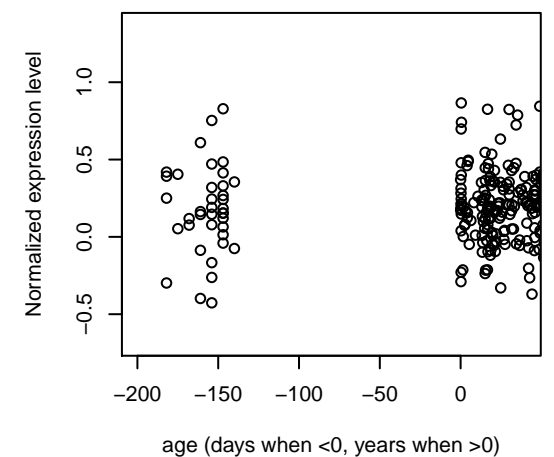

**LMCD1 (P=0.0371, Diff = -1.1)**  
**amygdaloid complex**

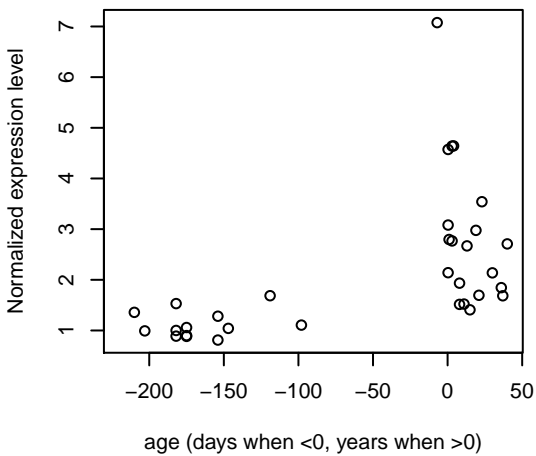

**LMCD1 (P=0.0548, Diff = -0.87)**  
**anterior cingulate cortex**

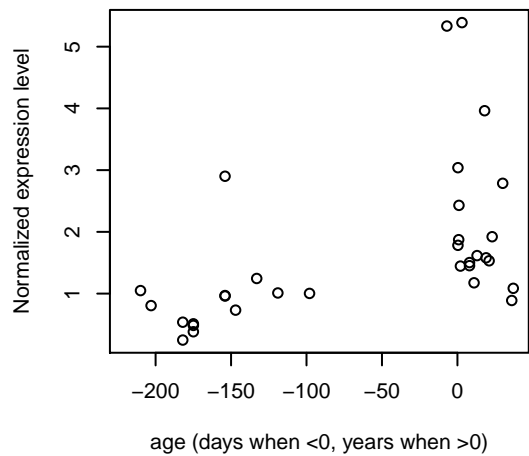

**LMCD1 (P=0.0075, Diff = -3.2)**  
**cerebellar cortex**

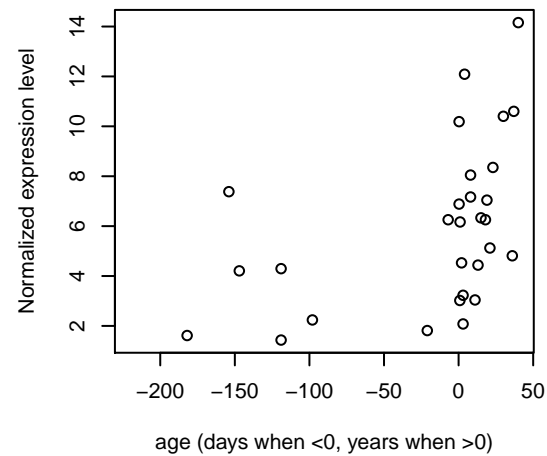

**LMCD1 (P=0.0848, Diff = -0.73)**  
**dorsolateral prefrontal cortex**

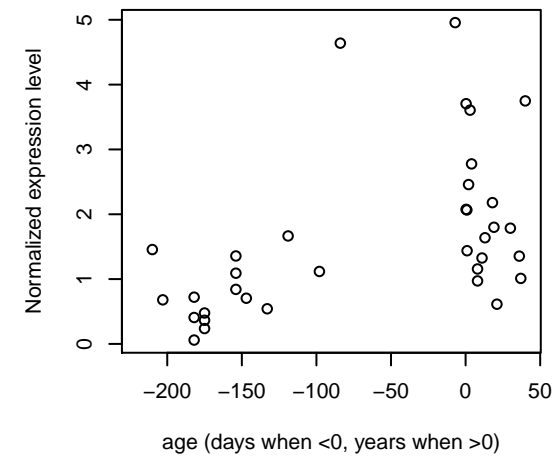

**LMCD1 (P=0.1114, Diff = -1)**  
**hippocampus**

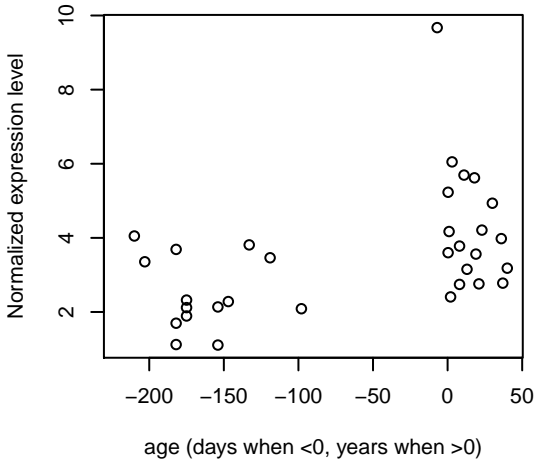

**LMCD1 (P=0.0152, Diff = -1.01)**  
**inferolateral temporal cortex**

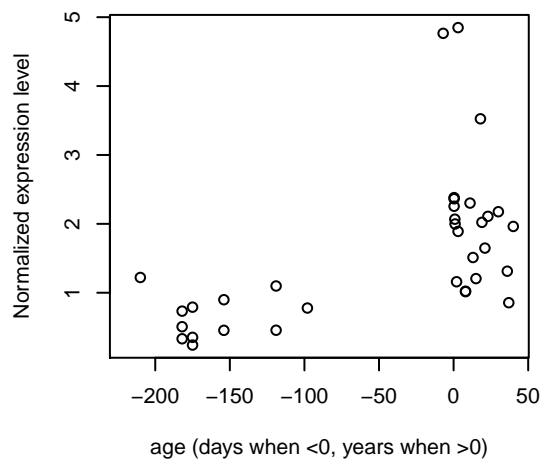

**LMCD1 (P=0.8405, Diff = 0.31)**  
**mediodorsal nucleus of thalamus**

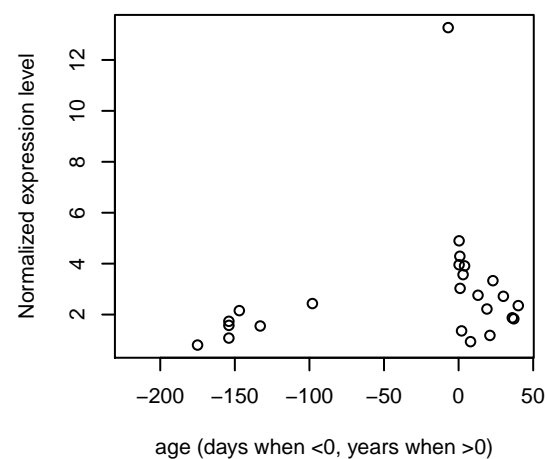

**LMCD1 (P=0.301, Diff = -0.55)**  
**orbital frontal cortex**

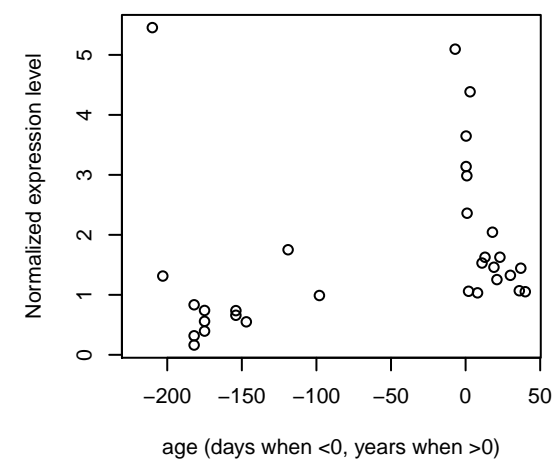

**LMCD1 (P=0.0034, Diff = -1.12)**  
**posterior superior temporal cortex**

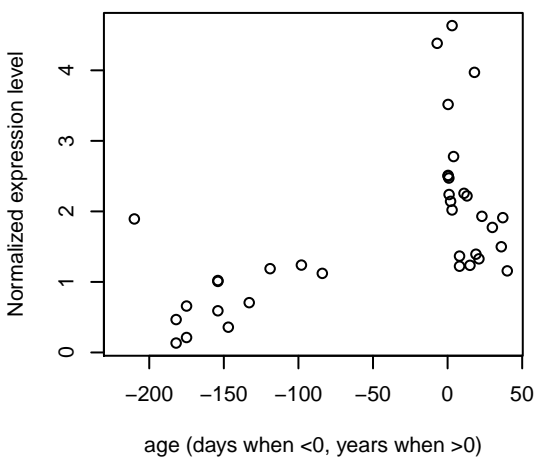

**LMCD1 (P=0.0089, Diff = -1.14)**  
**posteroventral parietal cortex**

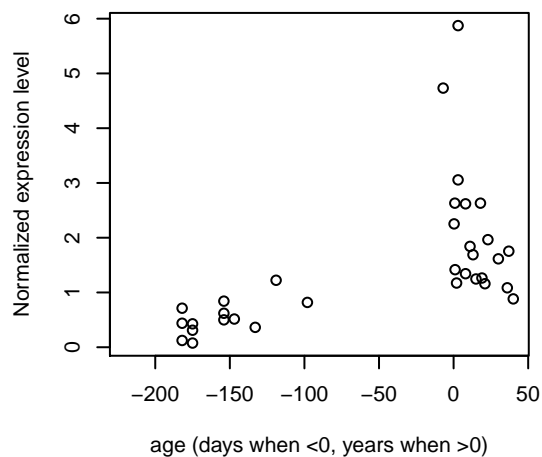

**LMCD1 (P=0.061, Diff = -1.04)**  
**primary auditory cortex**

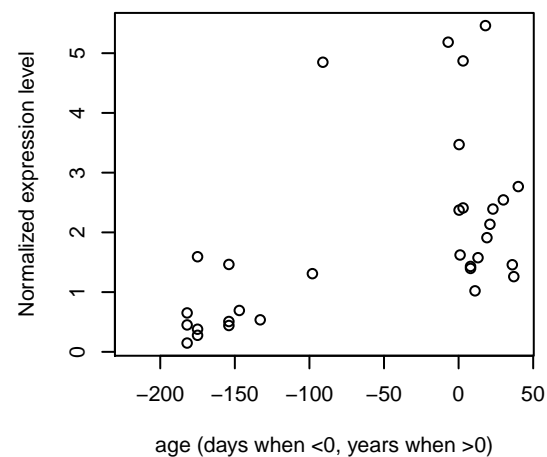

**LMCD1 (P=0.4386, Diff = -0.89)**  
**primary motor cortex**

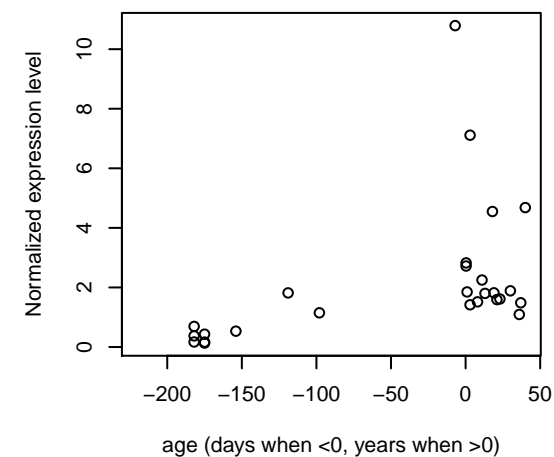

**LMCD1 (P=0.2122, Diff = -1.08)**  
**primary somatosensory cortex**

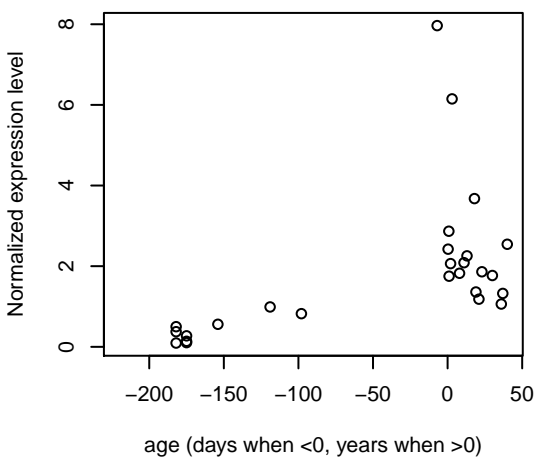

**LMCD1 (P=0.444, Diff = -0.45)**  
**primary visual cortex**

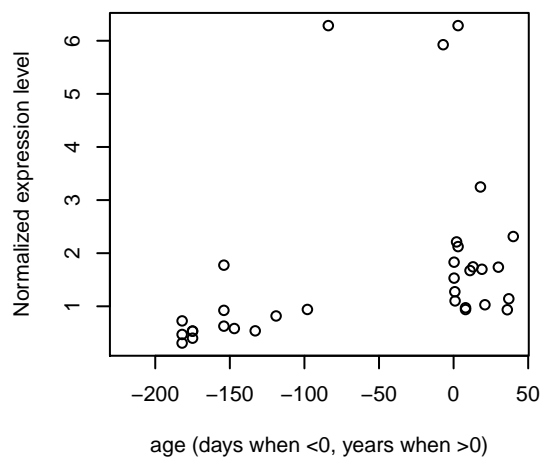

**LMCD1 (P=0.036, Diff = -1.15)**  
**striatum**

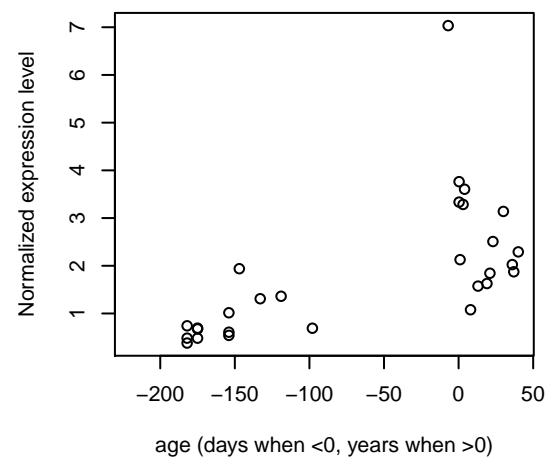

**LMCD1 (P=0, Diff = -0.25)**  
**prefrontal cortex**

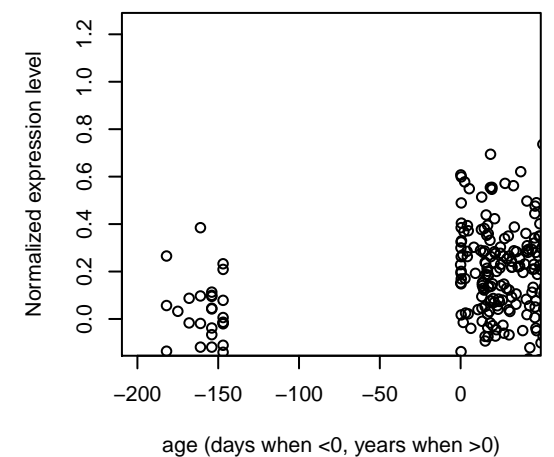

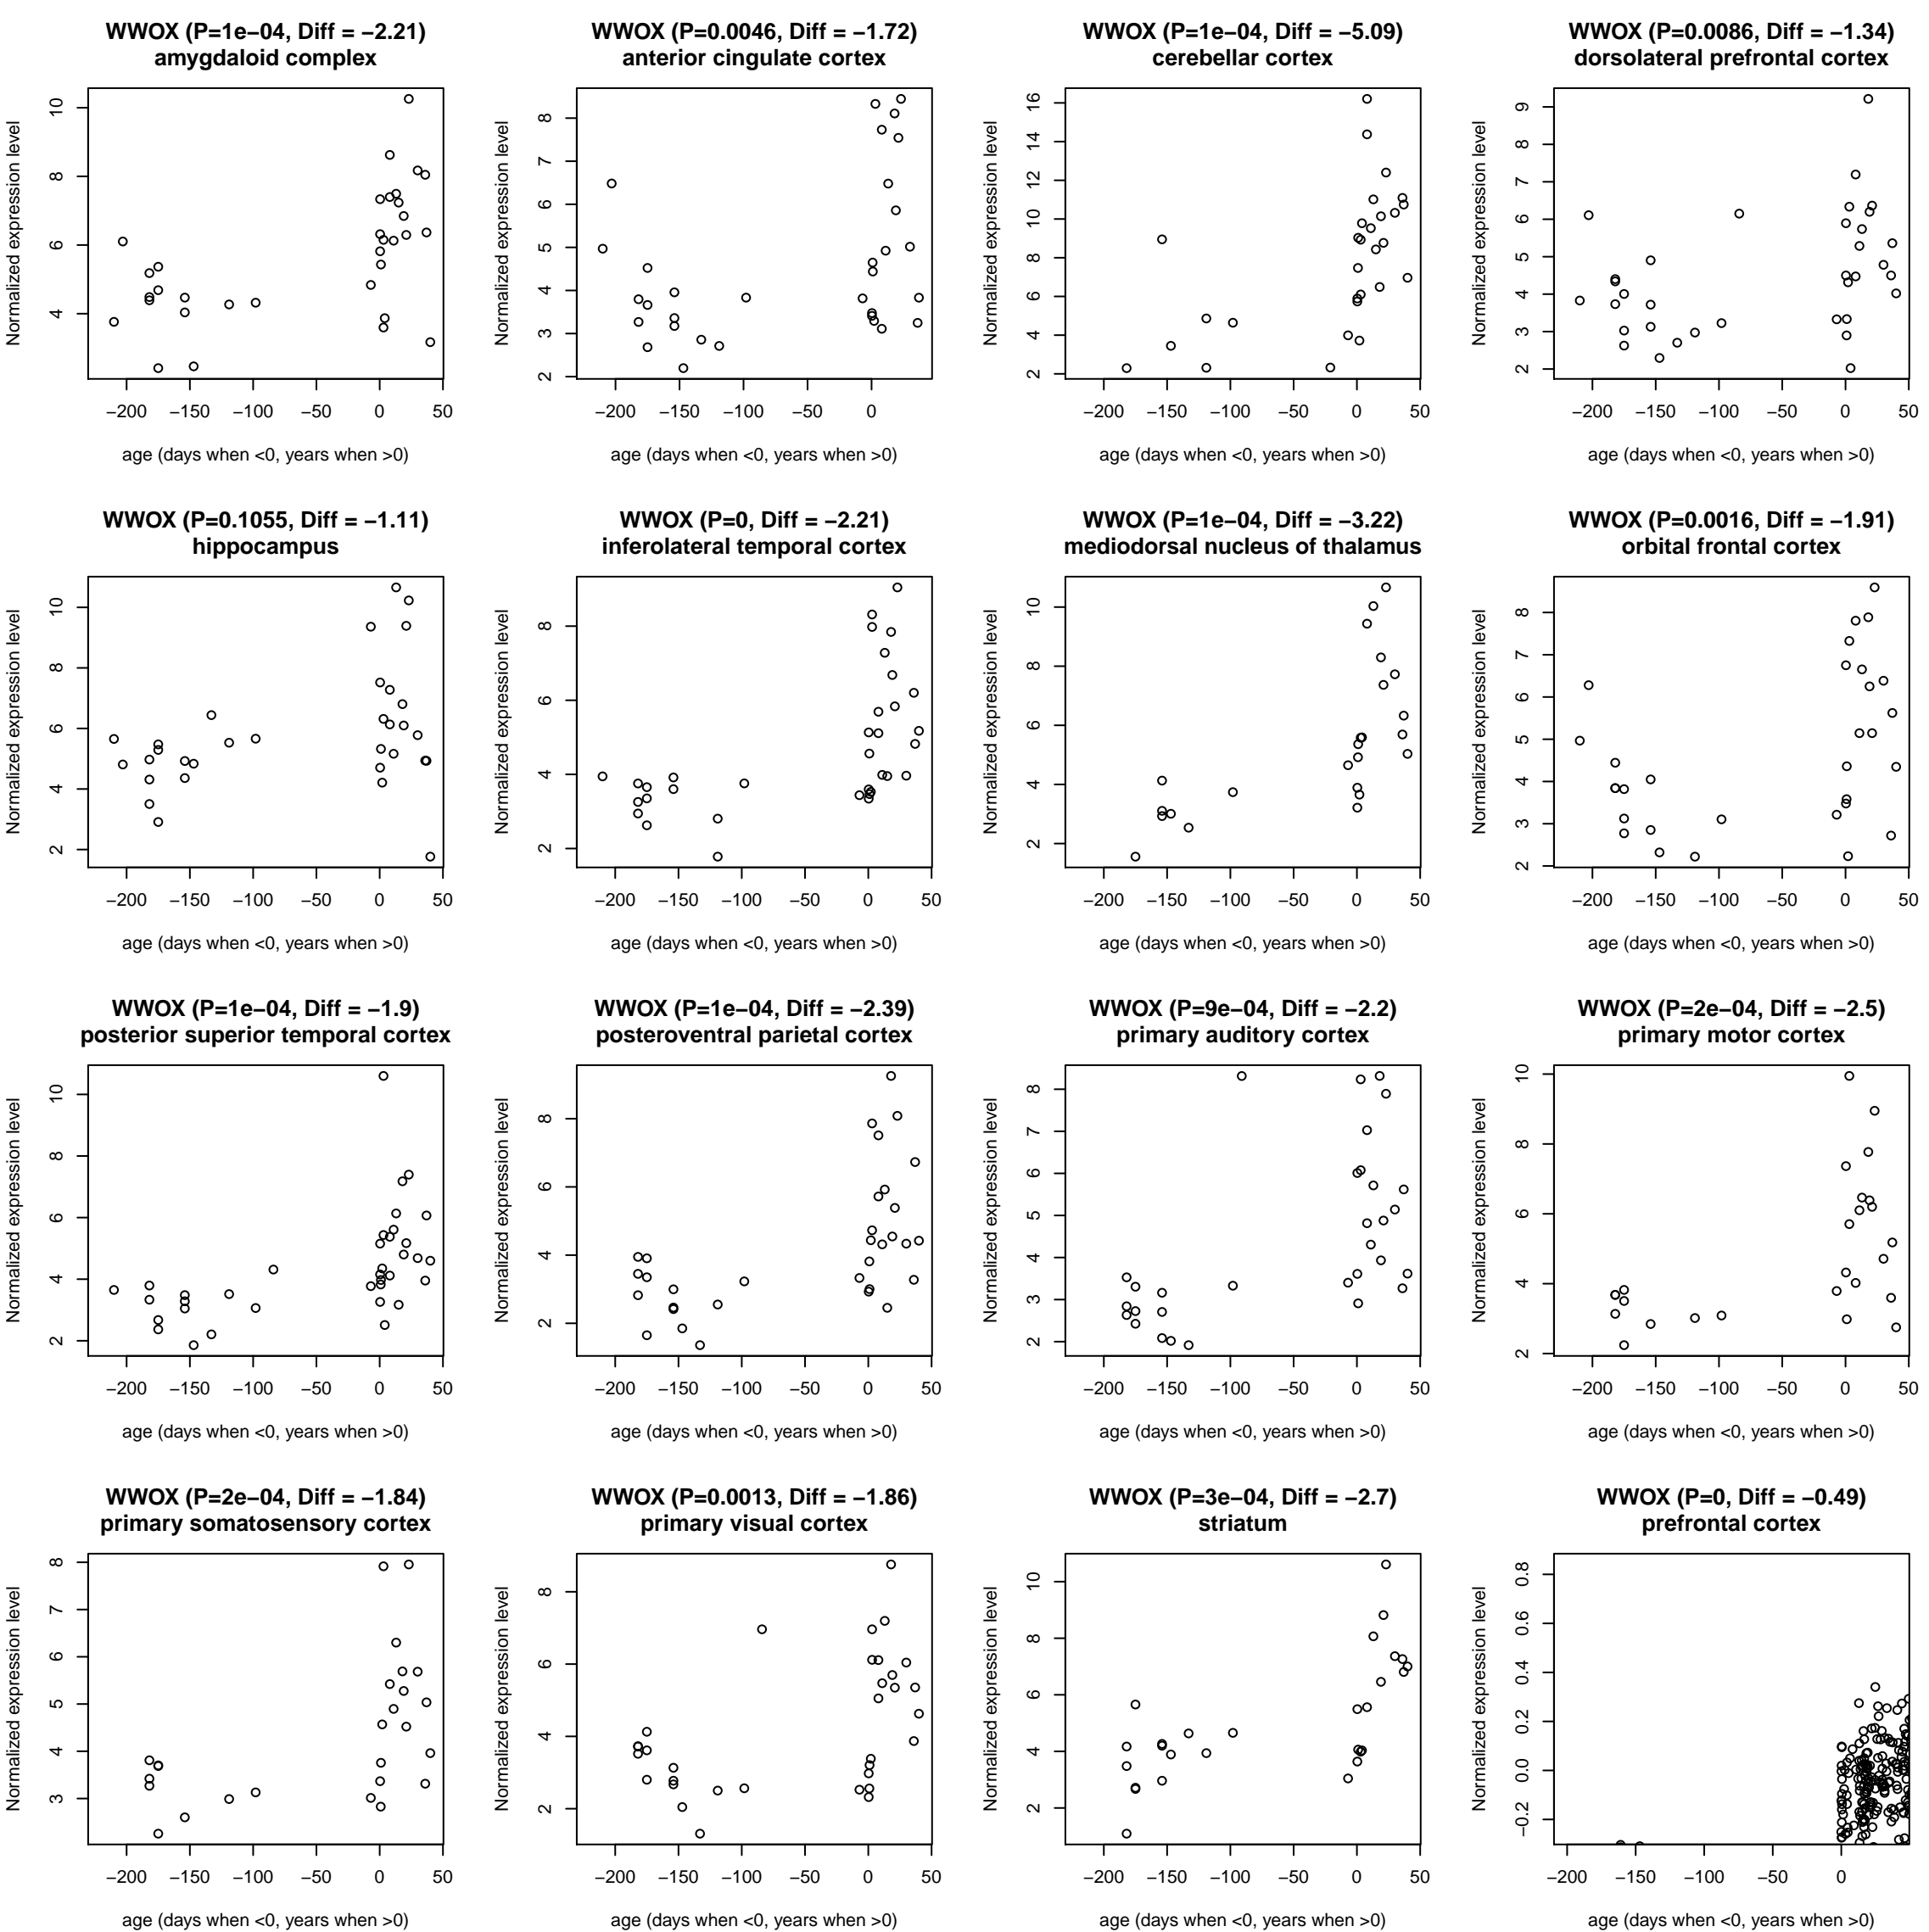

**SLC13A3 (P=0, Diff = -1.74)**  
**amygdaloid complex**

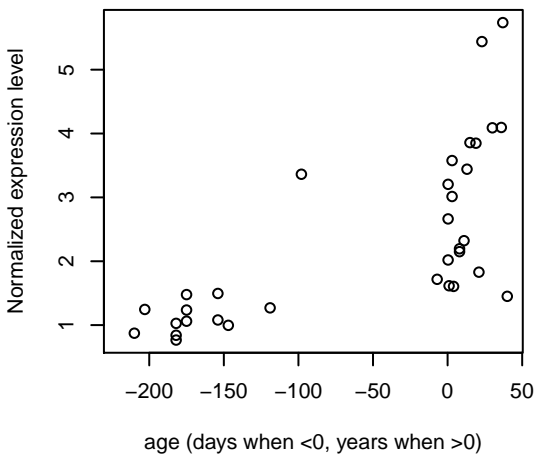

**SLC13A3 (P=0.0056, Diff = -0.77)**  
**anterior cingulate cortex**

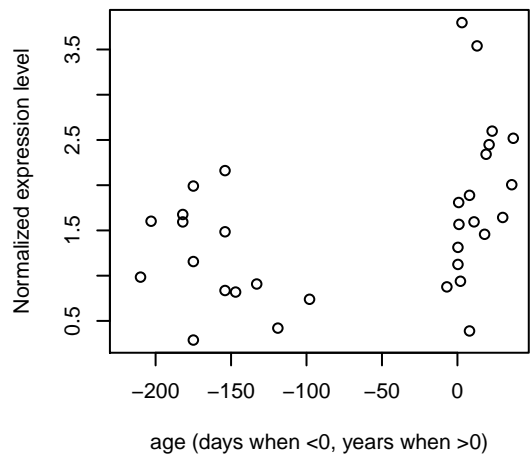

**SLC13A3 (P=0.0091, Diff = -0.82)**  
**cerebellar cortex**

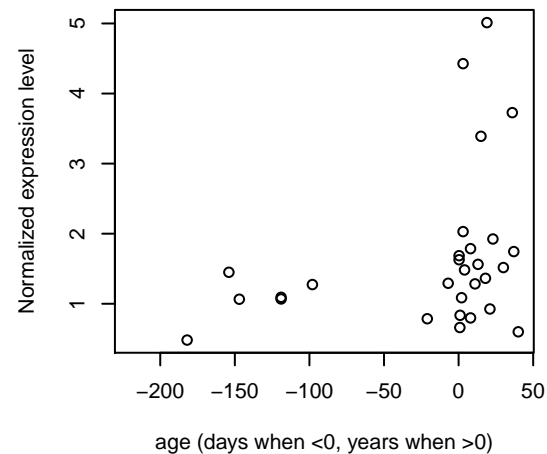

**SLC13A3 (P=0.1129, Diff = -0.59)**  
**dorsolateral prefrontal cortex**

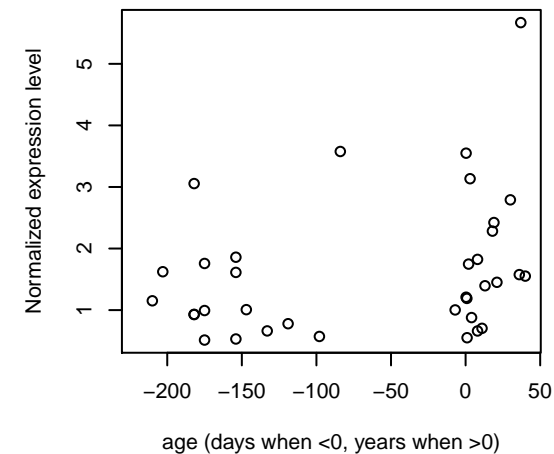

**SLC13A3 (P=5e-04, Diff = -1.22)**  
**hippocampus**

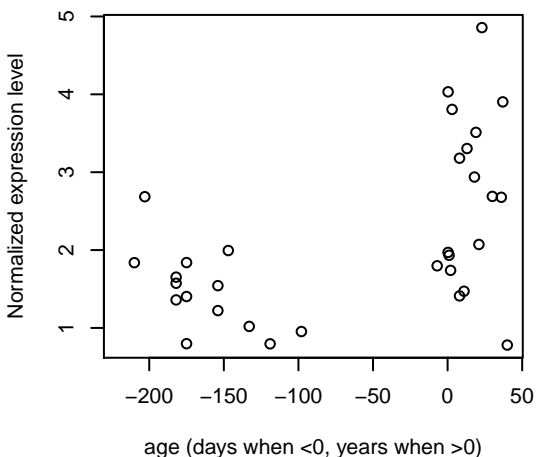

**SLC13A3 (P=0.5192, Diff = -0.31)**  
**inferolateral temporal cortex**

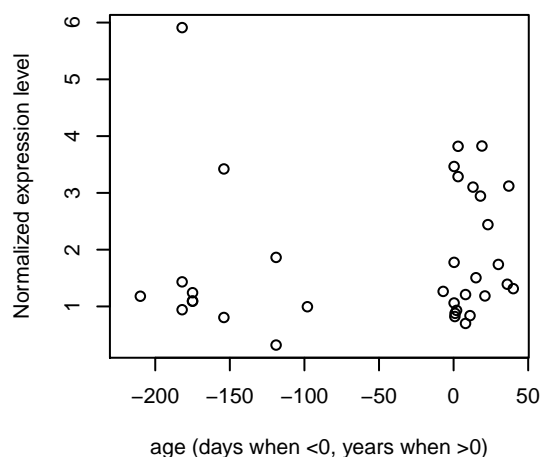

**SLC13A3 (P=0, Diff = -4.13)**  
**mediodorsal nucleus of thalamus**

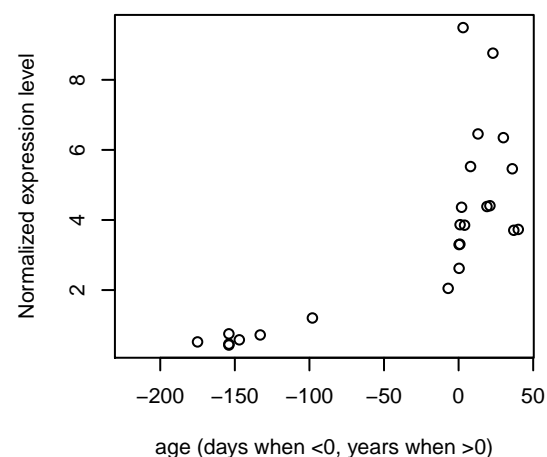

**SLC13A3 (P=8e-04, Diff = -1.43)**  
**orbital frontal cortex**

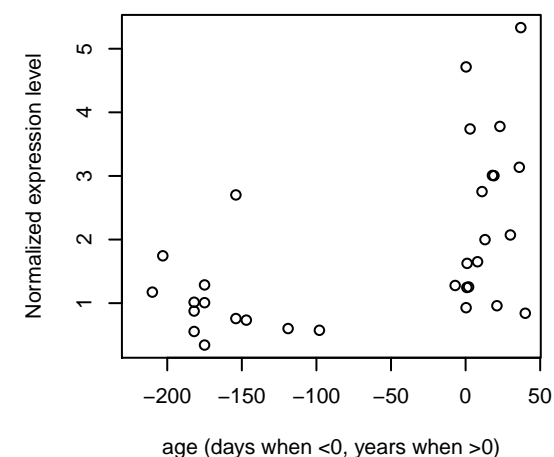

**SLC13A3 (P=0.9415, Diff = -0.03)**  
**posterior superior temporal cortex**

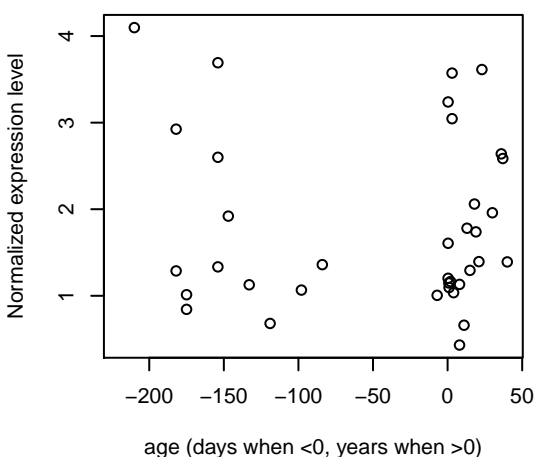

**SLC13A3 (P=0.0153, Diff = -0.69)**  
**posteroventral parietal cortex**

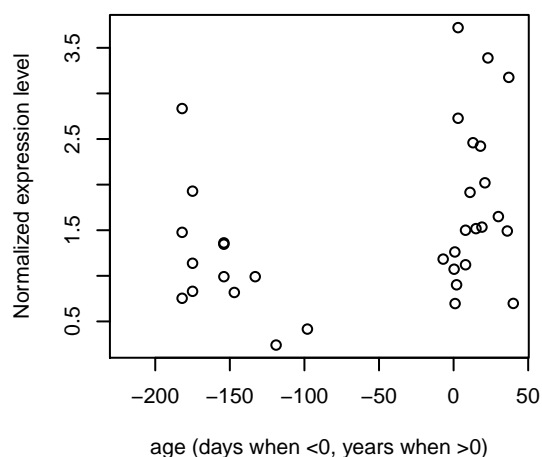

**SLC13A3 (P=0.0255, Diff = -0.91)**  
**primary auditory cortex**

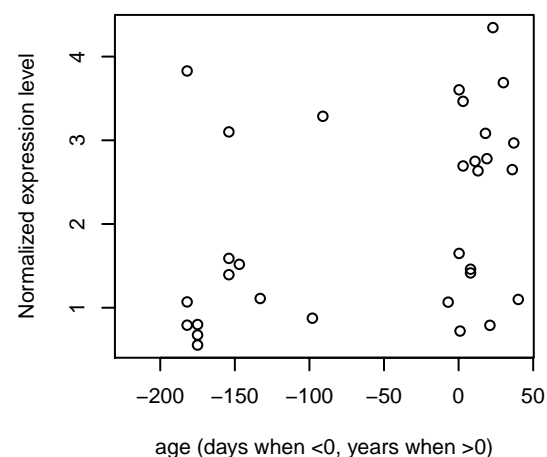

**SLC13A3 (P=6e-04, Diff = -1.38)**  
**primary motor cortex**

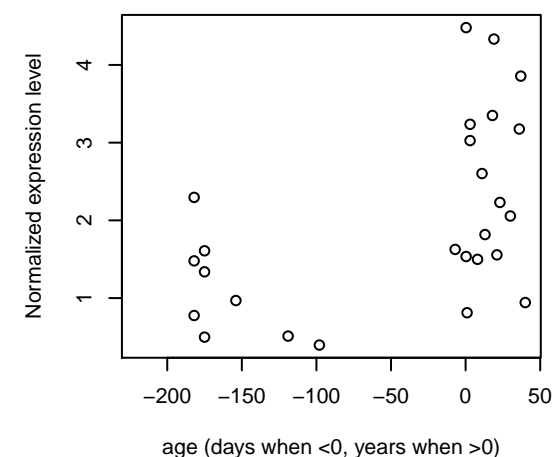

**SLC13A3 (P=0.0046, Diff = -0.93)**  
**primary somatosensory cortex**

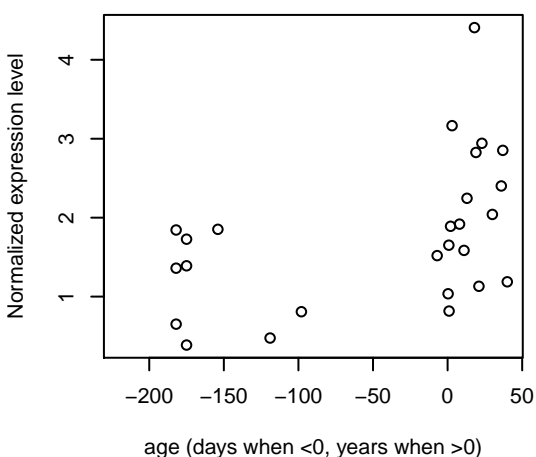

**SLC13A3 (P=0.7554, Diff = -0.13)**  
**primary visual cortex**

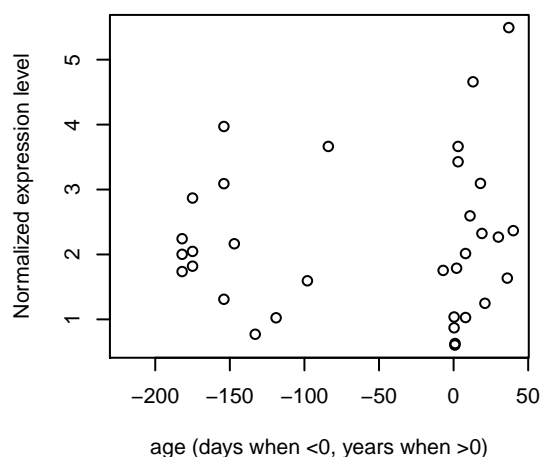

**SLC13A3 (P=0, Diff = -2.54)**  
**striatum**

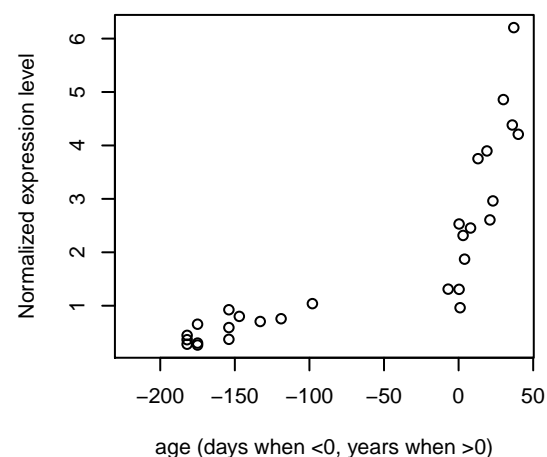

**SLC13A3 (P=0.145, Diff = 0.11)**  
**prefrontal cortex**

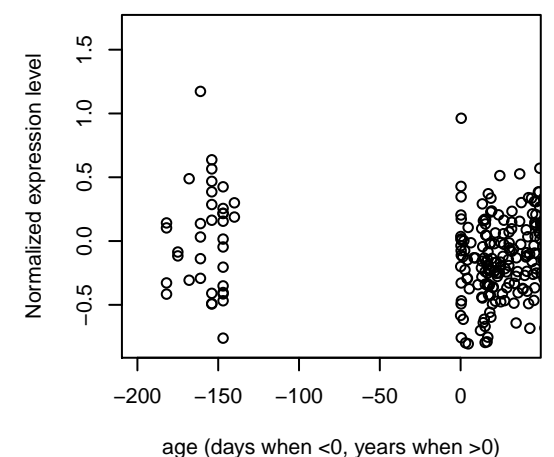

**HTR1B (P=0.5127, Diff = 0.21)**  
**amygdaloid complex**

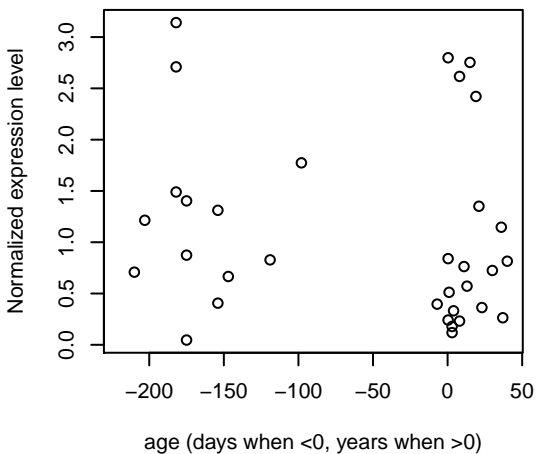

**HTR1B (P=0.0016, Diff = -0.55)**  
**anterior cingulate cortex**

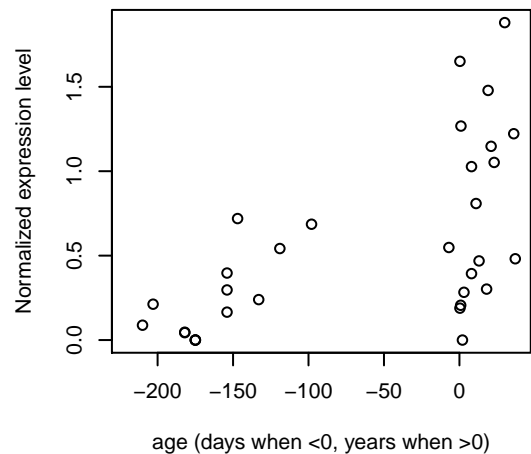

**HTR1B (P=0.0847, Diff = 0.29)**  
**cerebellar cortex**

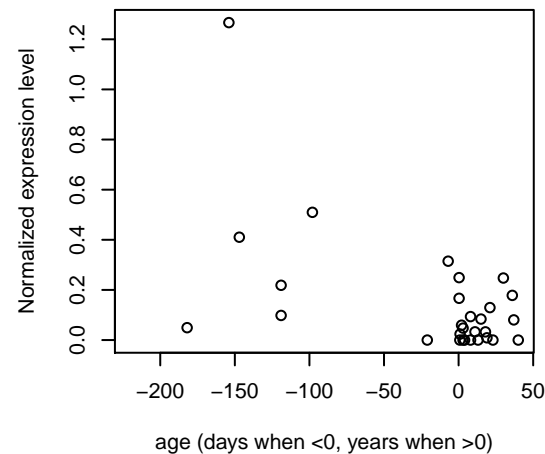

**HTR1B (P=0.0066, Diff = -0.56)**  
**dorsolateral prefrontal cortex**

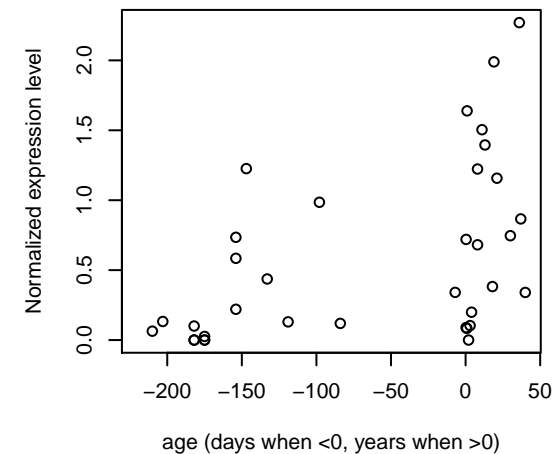

**HTR1B (P=0.7975, Diff = 0.03)**  
**hippocampus**

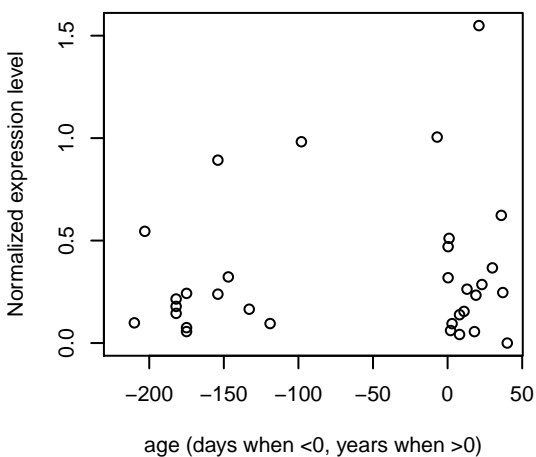

**HTR1B (P=0.8001, Diff = 0.05)**  
**inferolateral temporal cortex**

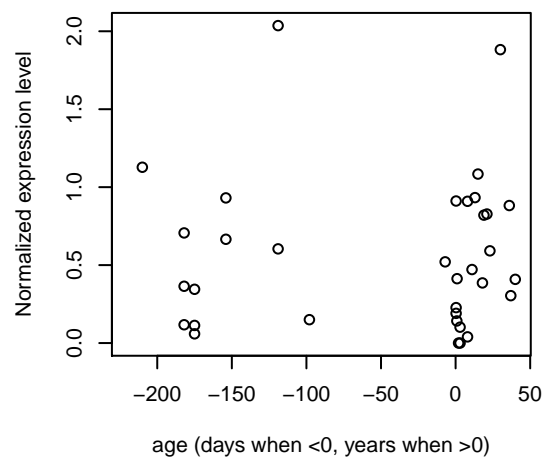

**HTR1B (P=0.1574, Diff = -0.61)**  
**mediodorsal nucleus of thalamus**

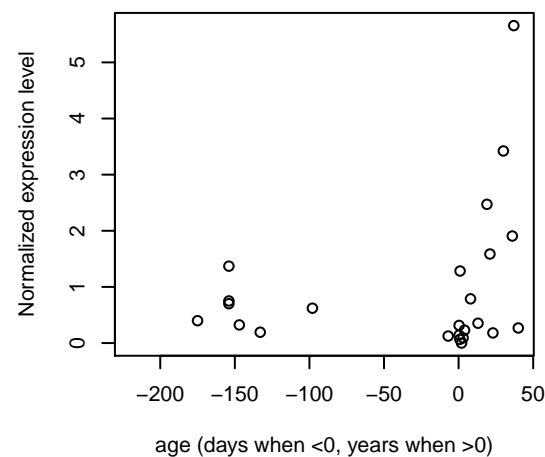

**HTR1B (P=0.0144, Diff = -0.45)**  
**orbital frontal cortex**

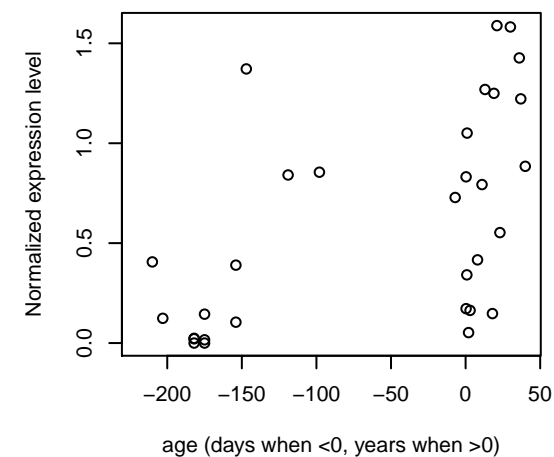

**HTR1B (P=0.0014, Diff = -0.61)**  
**posterior superior temporal cortex**

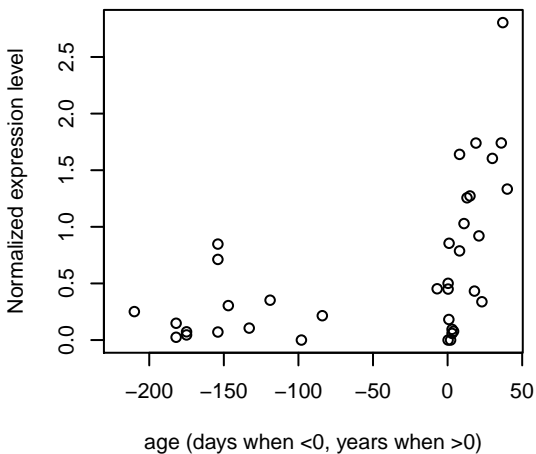

**HTR1B (P=1e-04, Diff = -0.61)**  
**posteroventral parietal cortex**

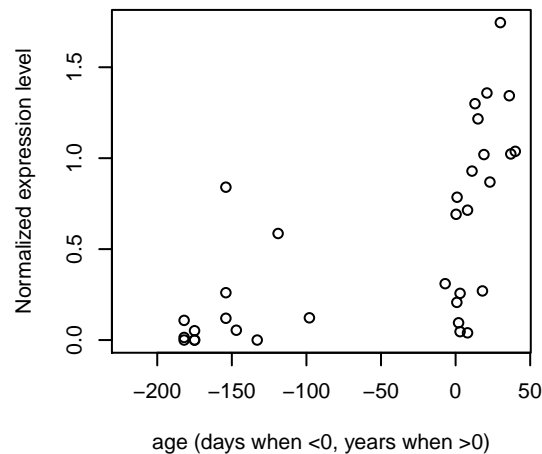

**HTR1B (P=0.0062, Diff = -0.53)**  
**primary auditory cortex**

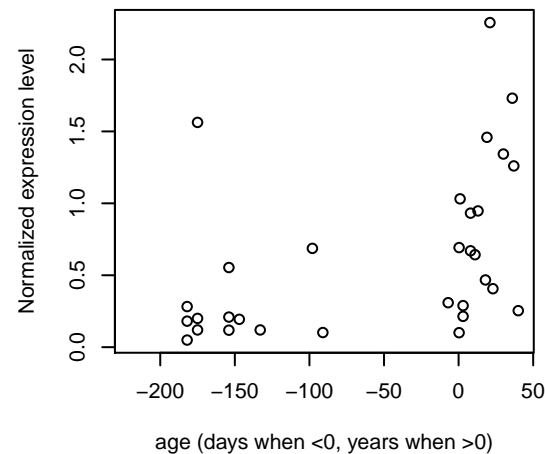

**HTR1B (P=0.0041, Diff = -0.94)**  
**primary motor cortex**

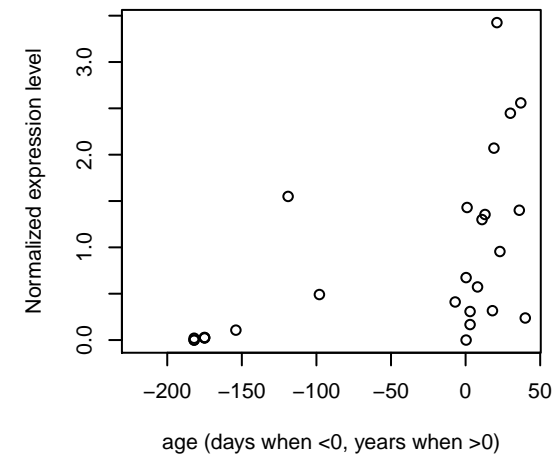

**HTR1B (P=0.0061, Diff = -0.77)**  
**primary somatosensory cortex**

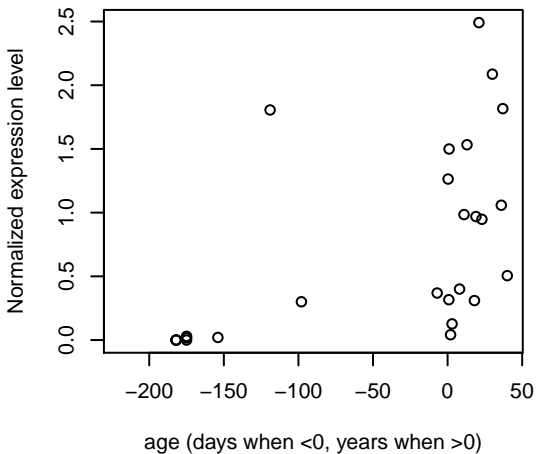

**HTR1B (P=0.003, Diff = -2.07)**  
**primary visual cortex**

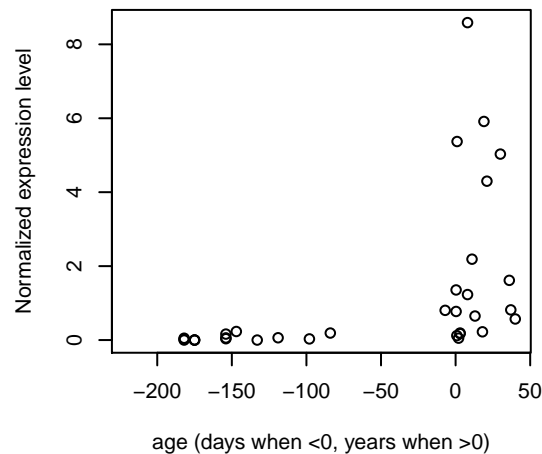

**HTR1B (P=0.2351, Diff = -0.44)**  
**striatum**

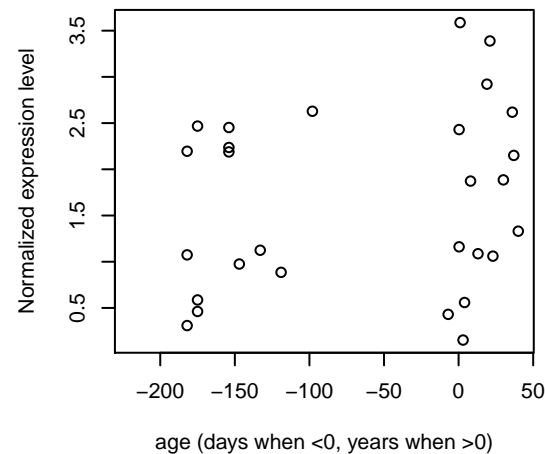

**MYOM1 (P=0, Diff = -2.11)**  
**amygdaloid complex**

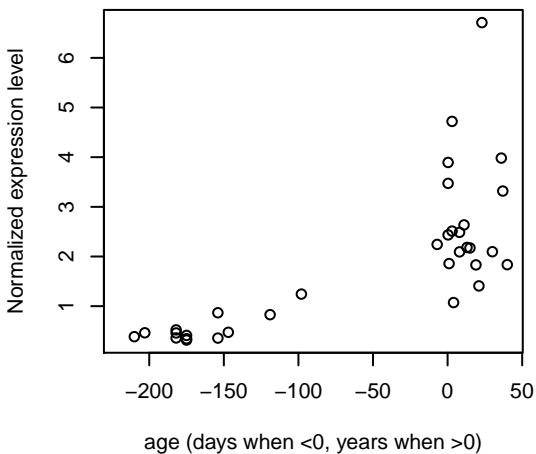

**MYOM1 (P=5e-04, Diff = -1.26)**  
**anterior cingulate cortex**

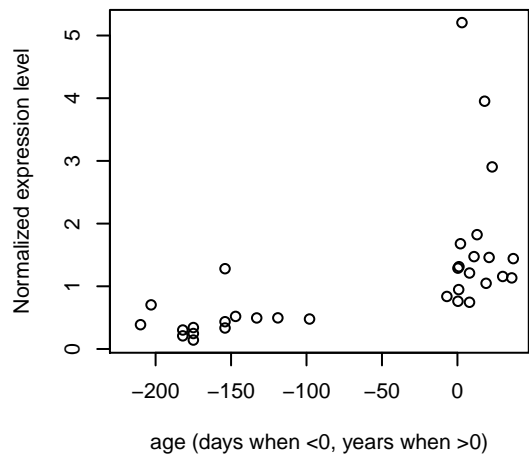

**MYOM1 (P=0.8685, Diff = -0.05)**  
**cerebellar cortex**

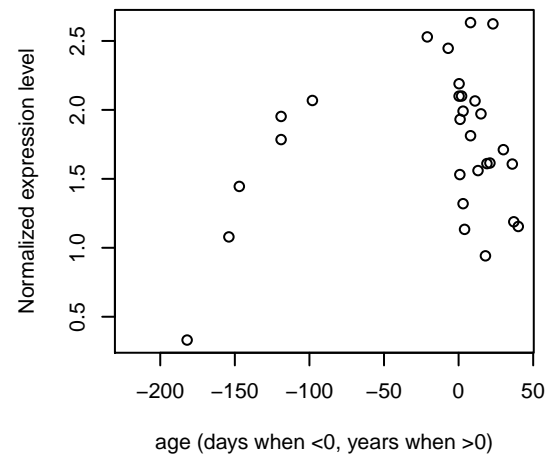

**MYOM1 (P=0.0165, Diff = -0.83)**  
**dorsolateral prefrontal cortex**

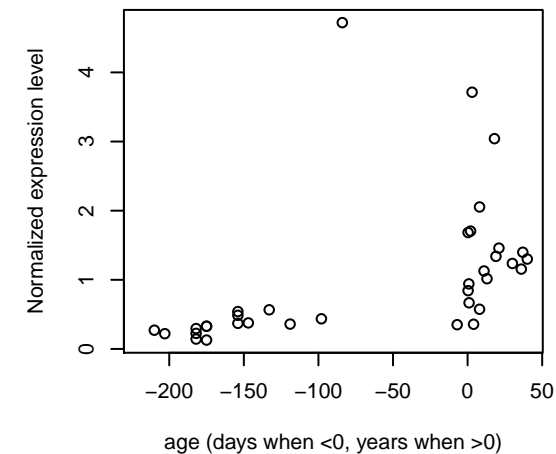

**MYOM1 (P=0, Diff = -2.02)**  
**hippocampus**

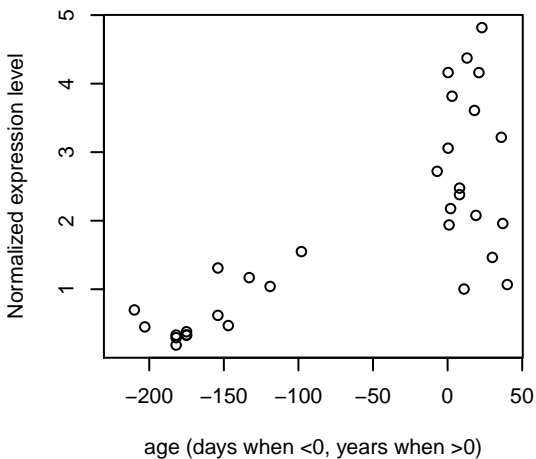

**MYOM1 (P=0, Diff = -1.55)**  
**inferolateral temporal cortex**

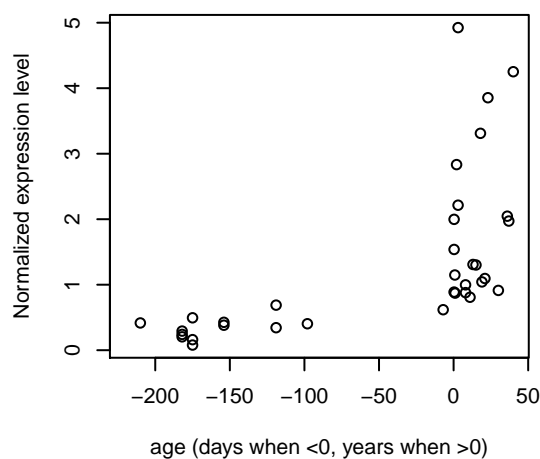

**MYOM1 (P=0.1155, Diff = -0.93)**  
**mediodorsal nucleus of thalamus**

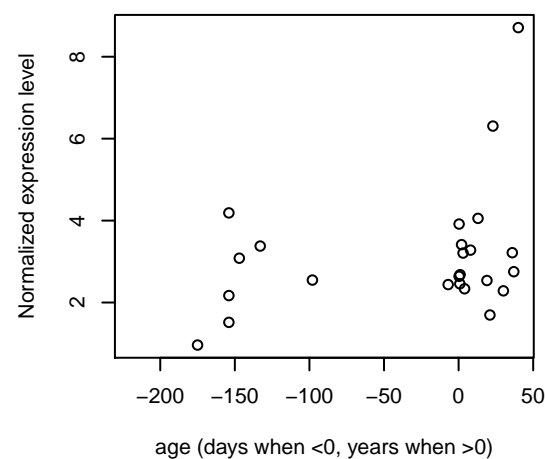

**MYOM1 (P=0, Diff = -1.38)**  
**orbital frontal cortex**

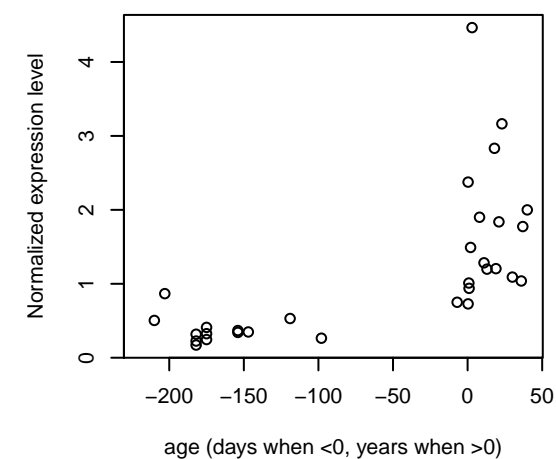

**MYOM1 (P=0, Diff = -1.47)**  
**posterior superior temporal cortex**

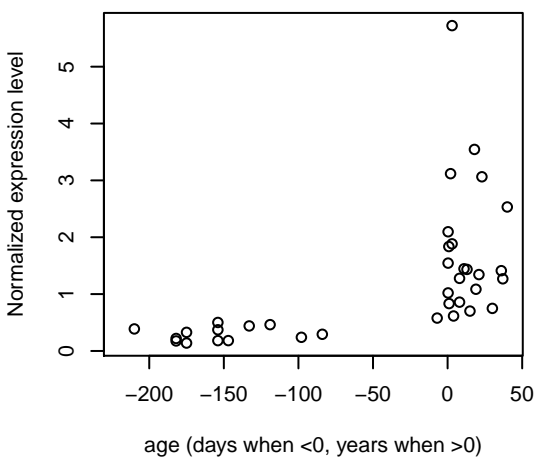

**MYOM1 (P=0, Diff = -1.48)**  
**posteroventral parietal cortex**

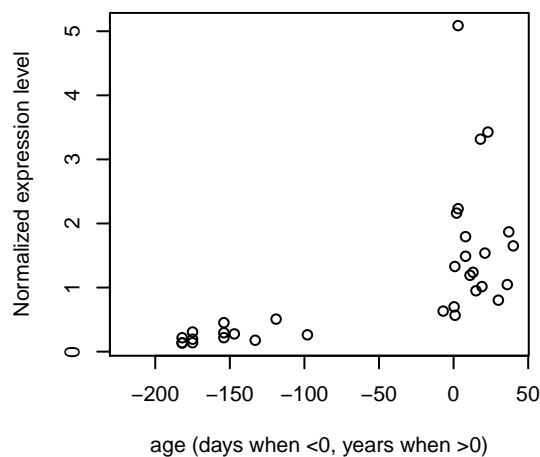

**MYOM1 (P=0.0149, Diff = -1.07)**  
**primary auditory cortex**

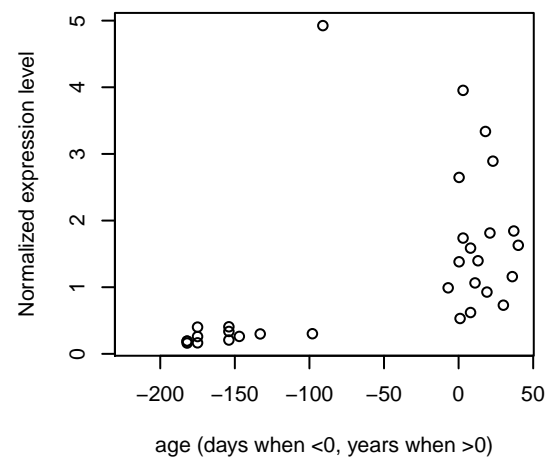

**MYOM1 (P=1e-04, Diff = -1.51)**  
**primary motor cortex**

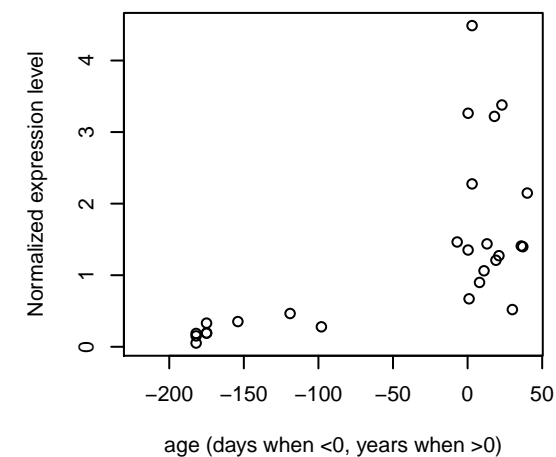

**MYOM1 (P=1e-04, Diff = -1.3)**  
**primary somatosensory cortex**

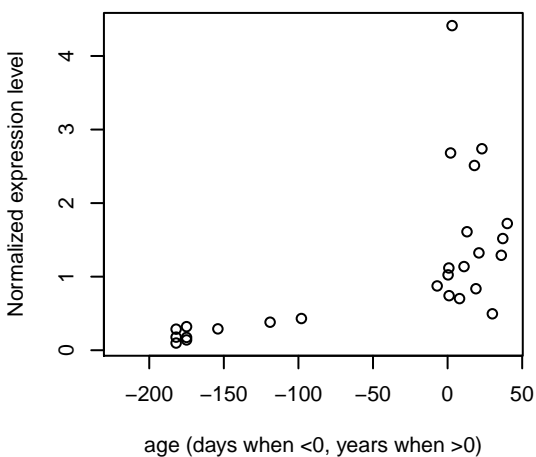

**MYOM1 (P=0.0177, Diff = -1)**  
**primary visual cortex**

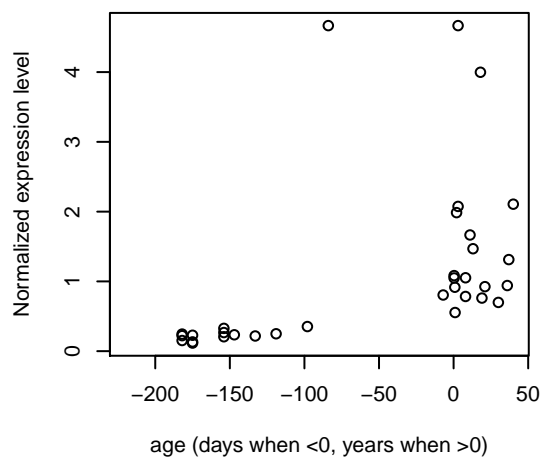

**MYOM1 (P=0, Diff = -2.36)**  
**striatum**

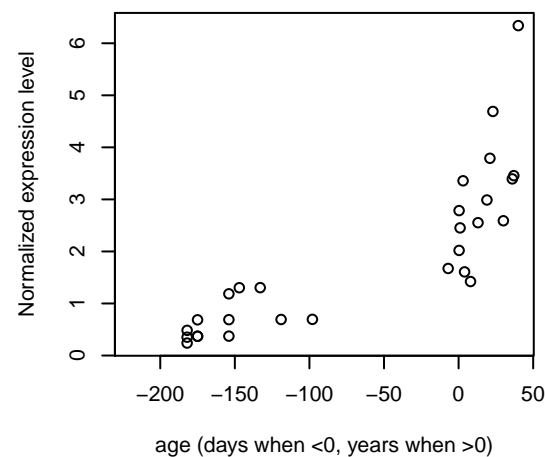

**USP44 (P=0.0048, Diff = 0.12)**  
**amygdaloid complex**

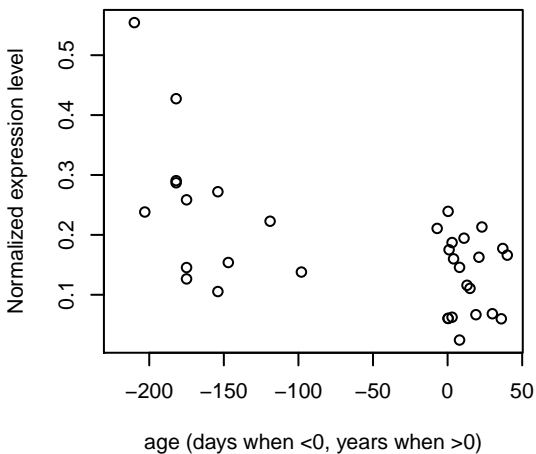

**USP44 (P=0.0914, Diff = 0.41)**  
**anterior cingulate cortex**

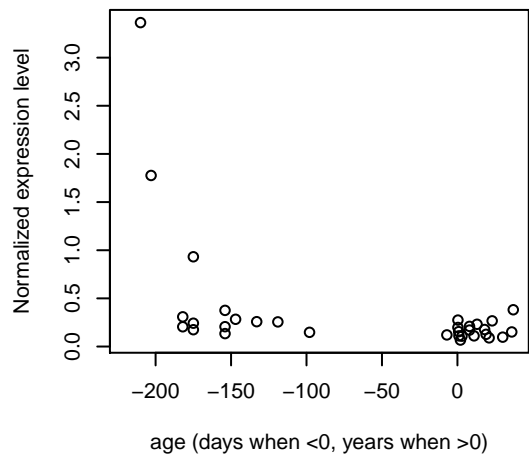

**USP44 (P=0, Diff = -0.48)**  
**cerebellar cortex**

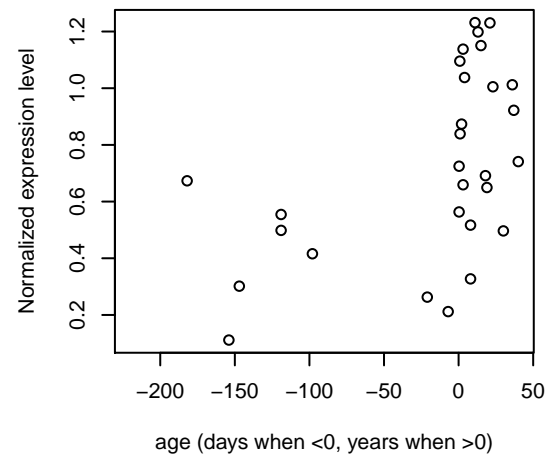

**USP44 (P=0.0837, Diff = 0.37)**  
**dorsolateral prefrontal cortex**

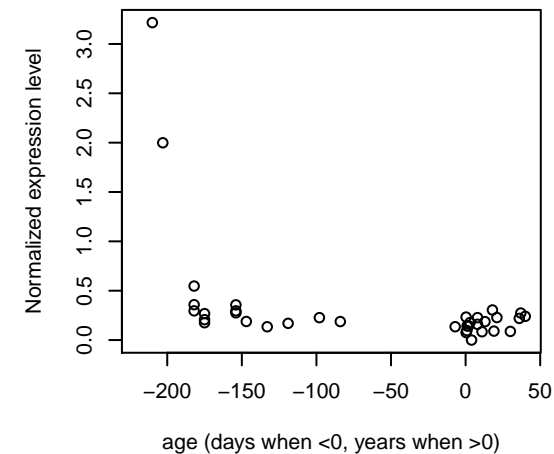

**USP44 (P=0.0618, Diff = 0.12)**  
**hippocampus**

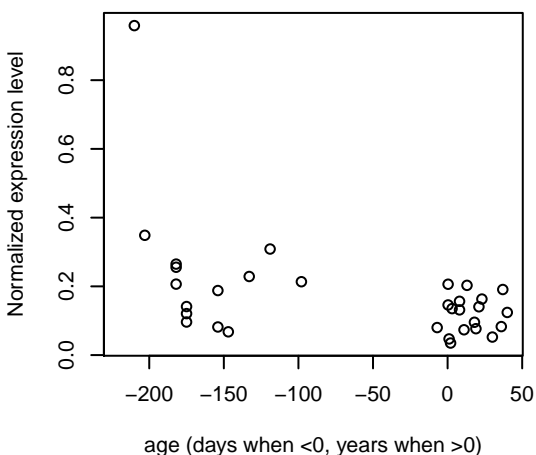

**USP44 (P=0.8192, Diff = -0.01)**  
**inferolateral temporal cortex**

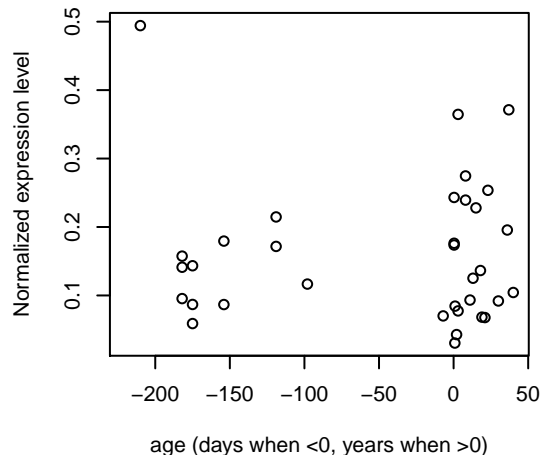

**USP44 (P=0.6925, Diff = 0.01)**  
**mediodorsal nucleus of thalamus**

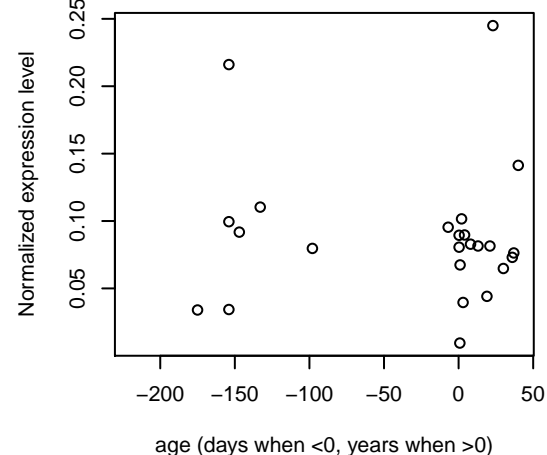

**USP44 (P=0.0369, Diff = 0.26)**  
**orbital frontal cortex**

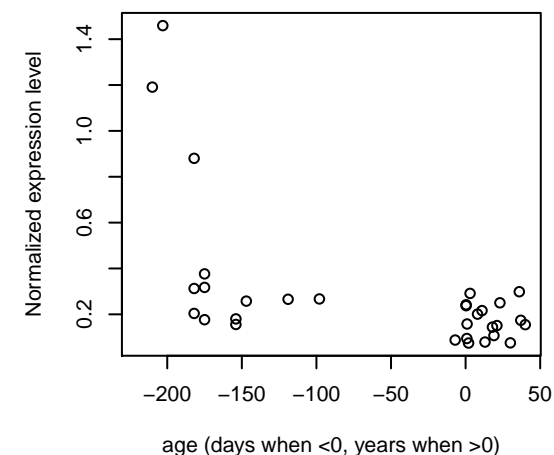

**USP44 (P=0.7996, Diff = 0.01)**  
**posterior superior temporal cortex**

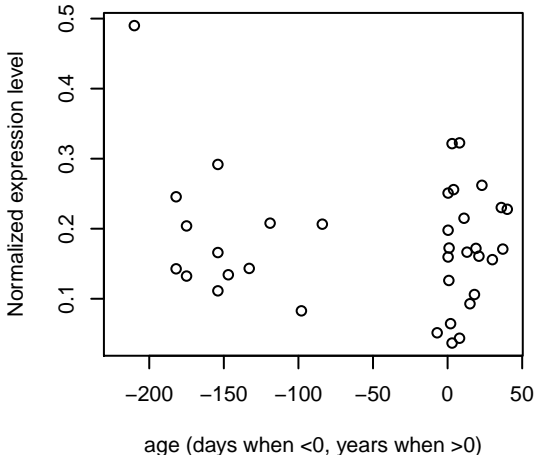

**USP44 (P=0.71, Diff = -0.01)**  
**posteroventral parietal cortex**

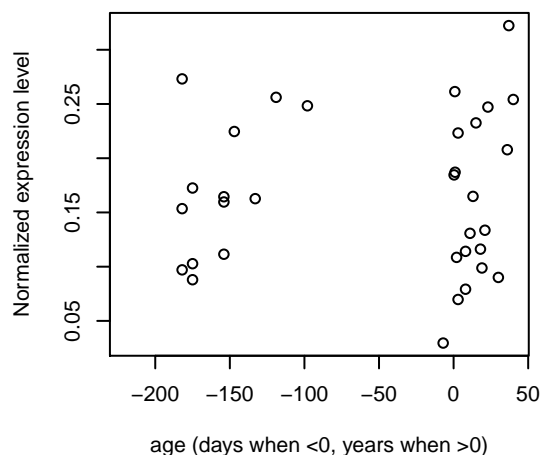

**USP44 (P=0.8227, Diff = -0.01)**  
**primary auditory cortex**

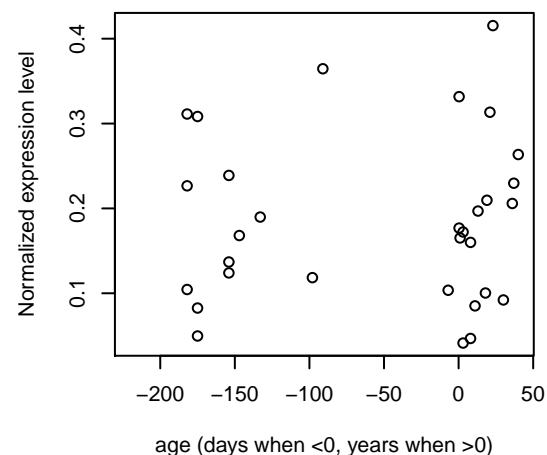

**USP44 (P=0.7391, Diff = 0.01)**  
**primary motor cortex**

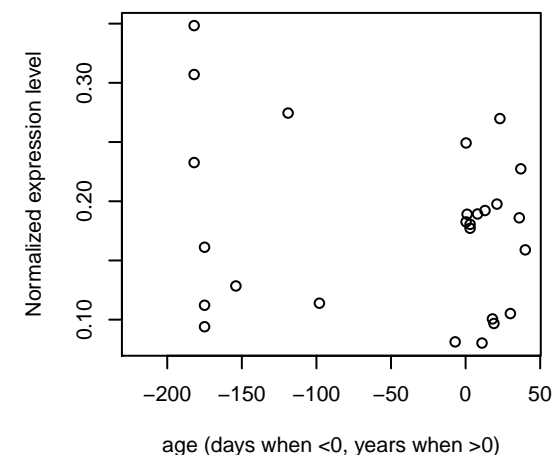

**USP44 (P=0.9662, Diff = 0)**  
**primary somatosensory cortex**

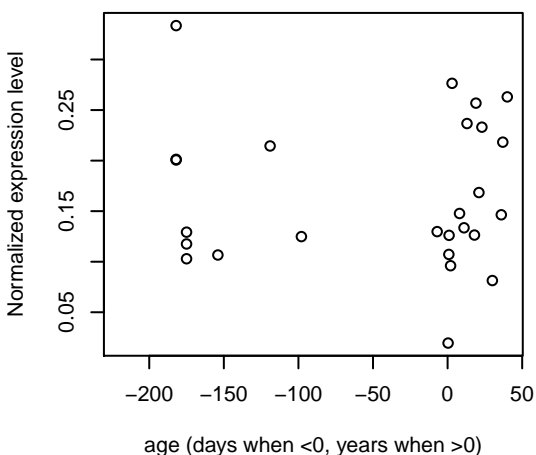

**USP44 (P=0.8081, Diff = 0.01)**  
**primary visual cortex**

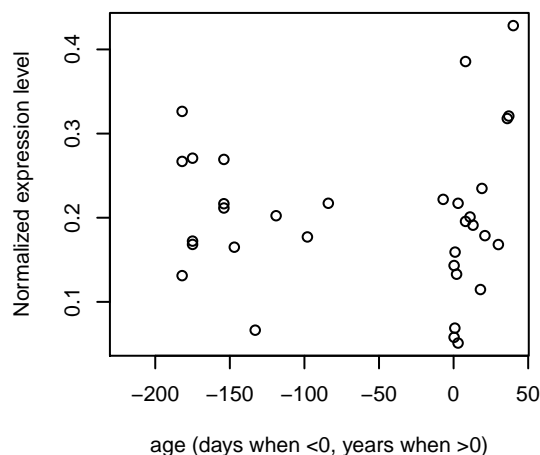

**USP44 (P=0.0011, Diff = 0.17)**  
**striatum**

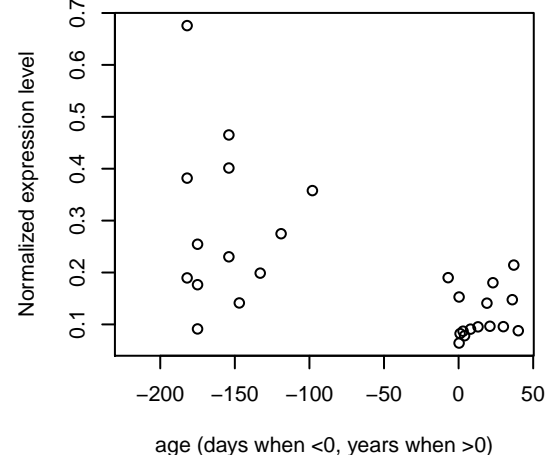

**USP44 (P=0, Diff = 0.81)**  
**prefrontal cortex**

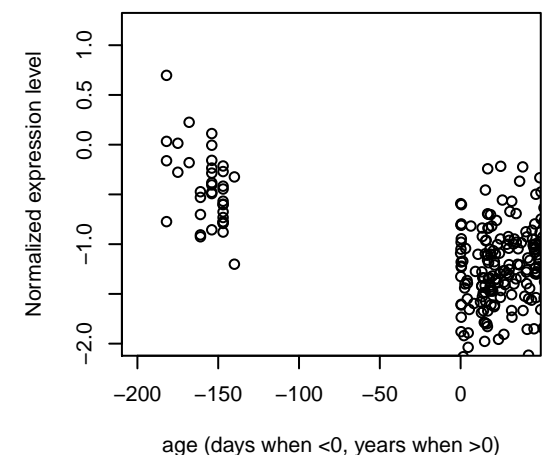



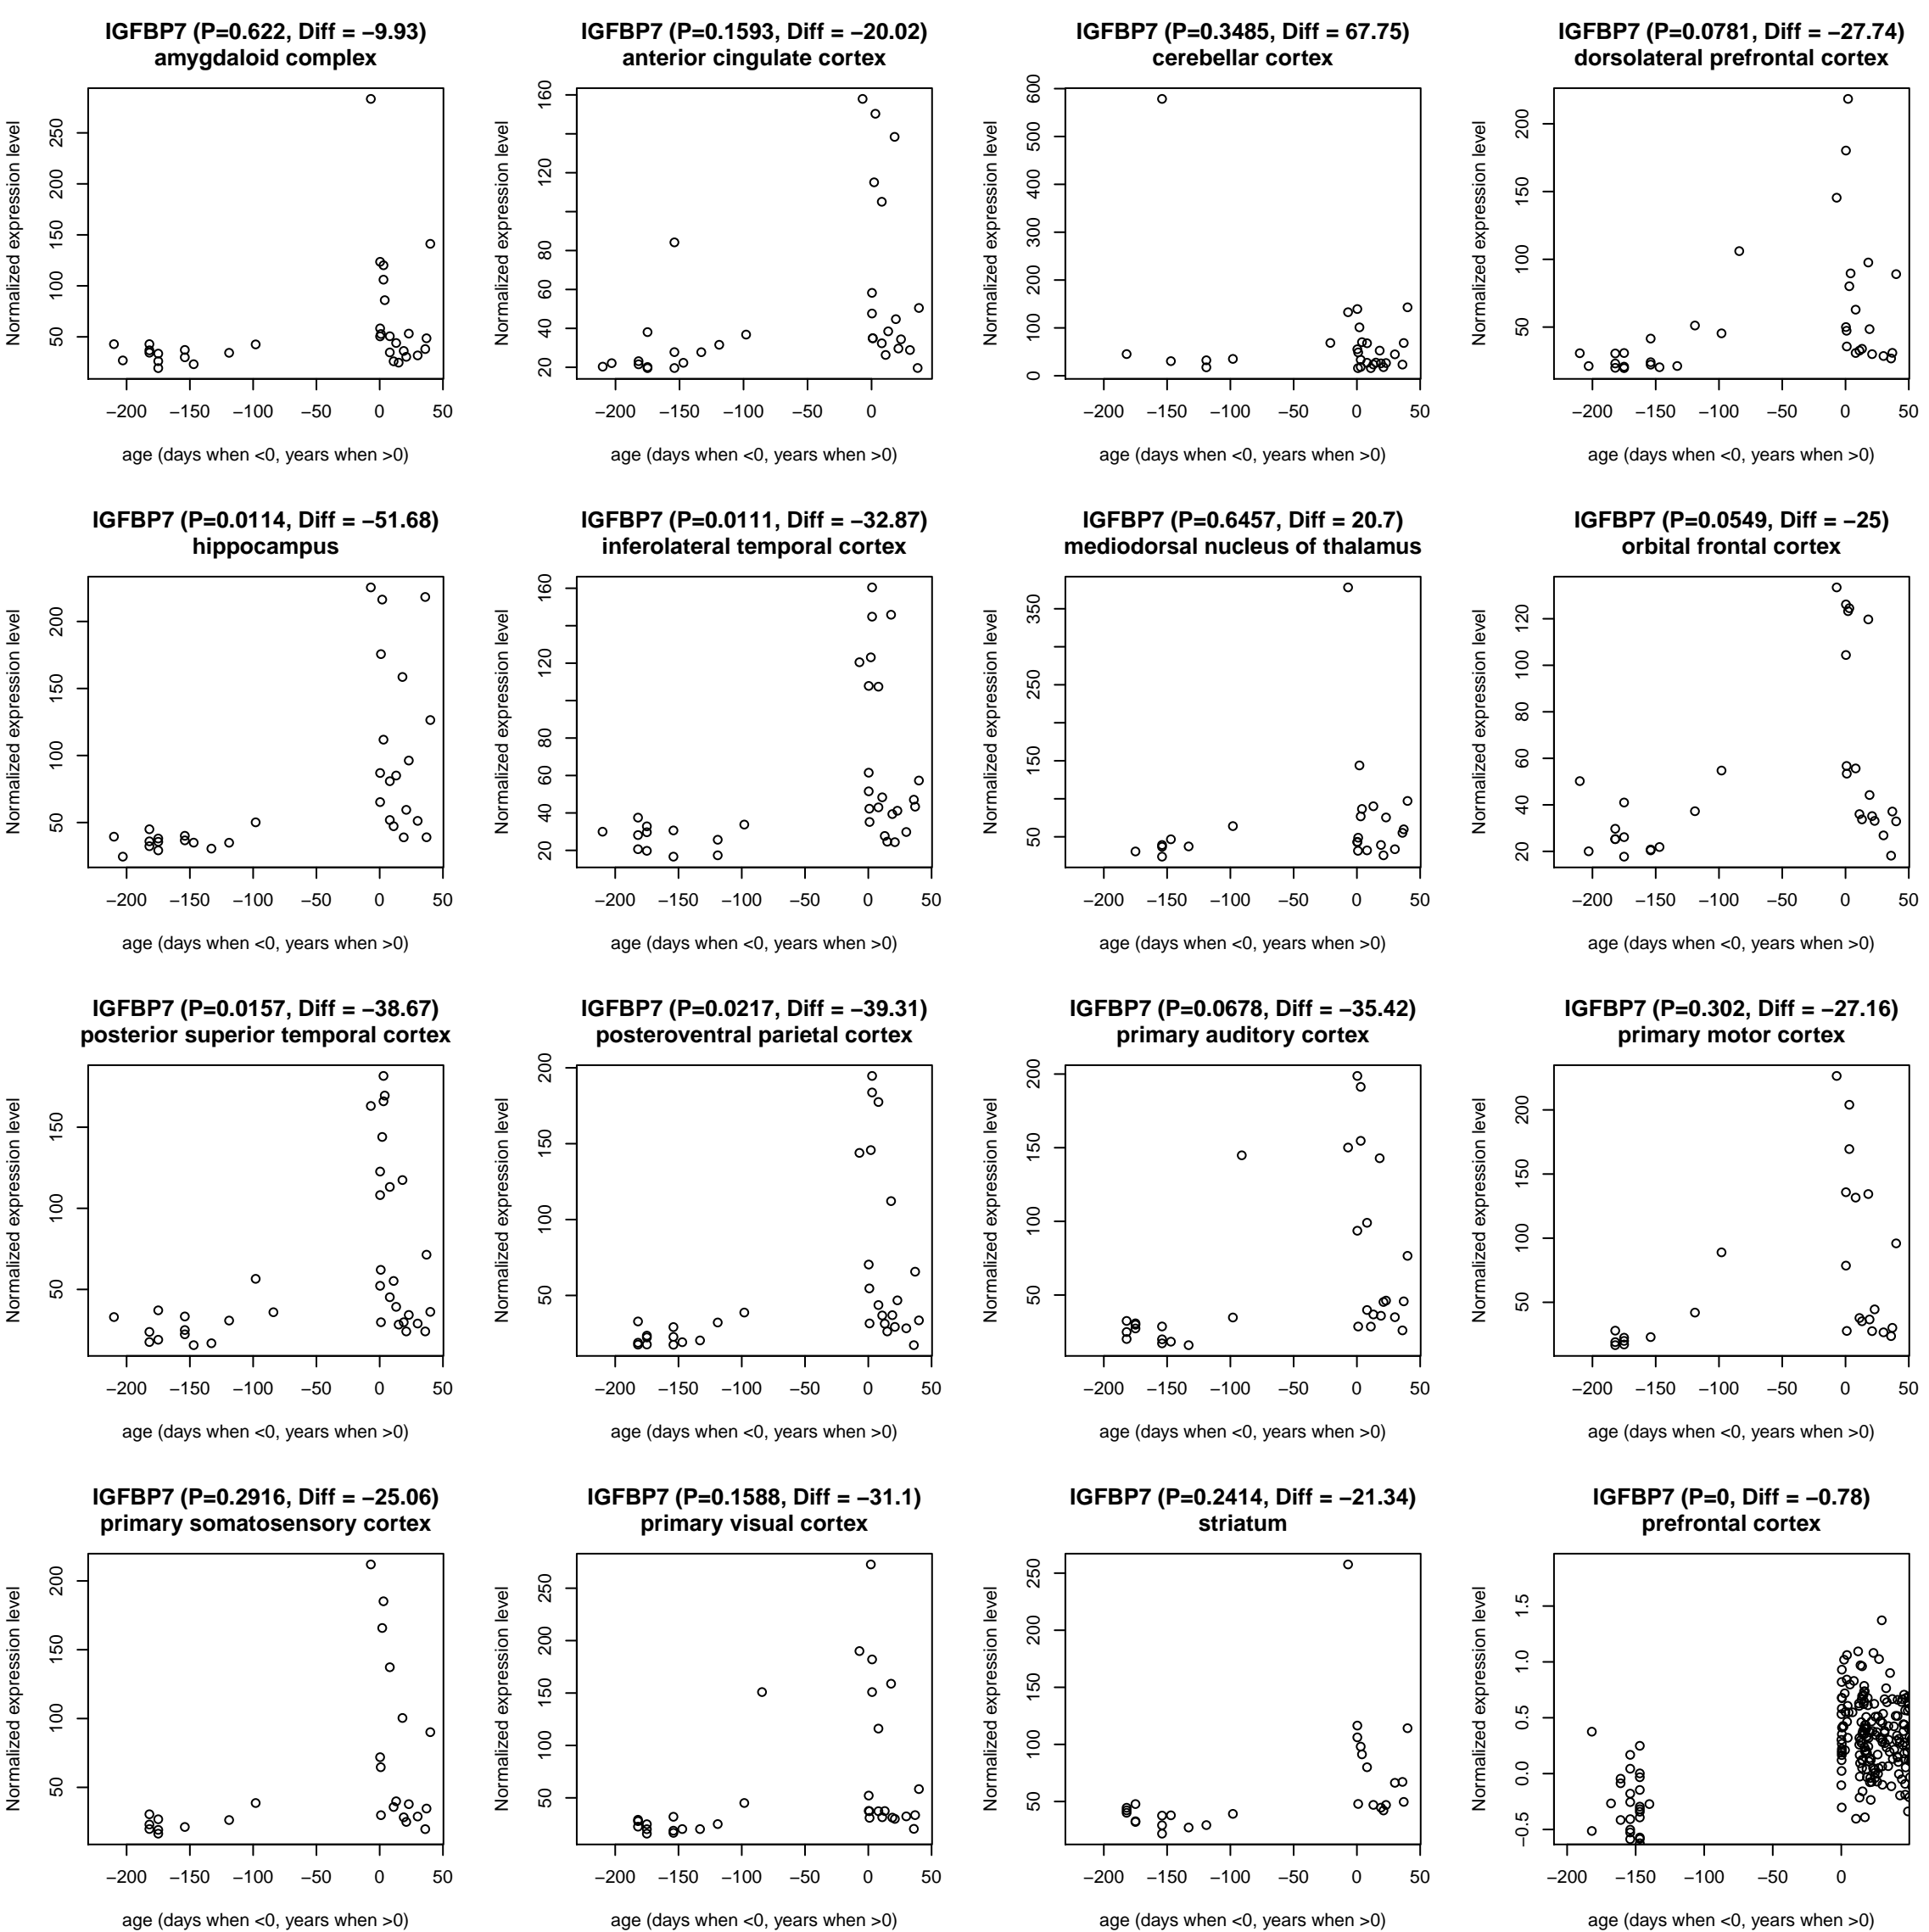

**OPA1 (P=0.9889, Diff = -0.03)**  
**amygdaloid complex**

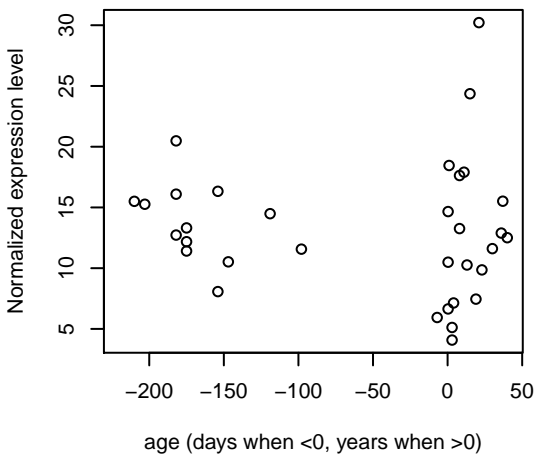

**OPA1 (P=0.4498, Diff = -1.6)**  
**anterior cingulate cortex**

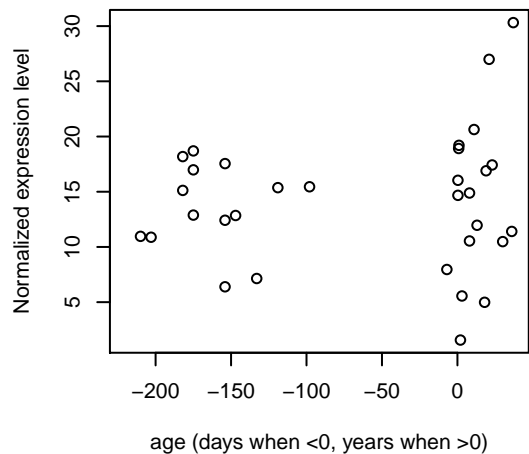

**OPA1 (P=0.4112, Diff = 1.31)**  
**cerebellar cortex**

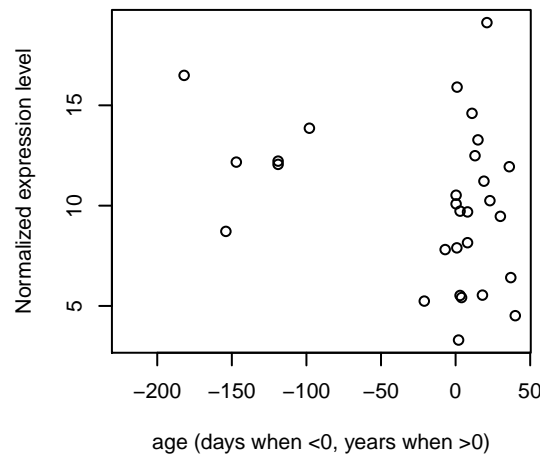

**OPA1 (P=0.1714, Diff = -2.95)**  
**dorsolateral prefrontal cortex**

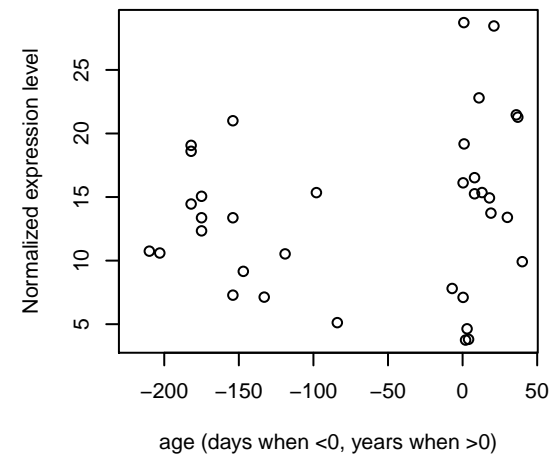

**OPA1 (P=0.2755, Diff = -2.3)**  
**hippocampus**

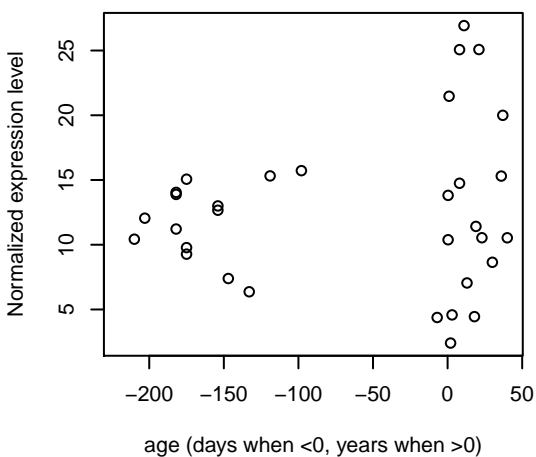

**OPA1 (P=0.0283, Diff = -5.52)**  
**inferolateral temporal cortex**

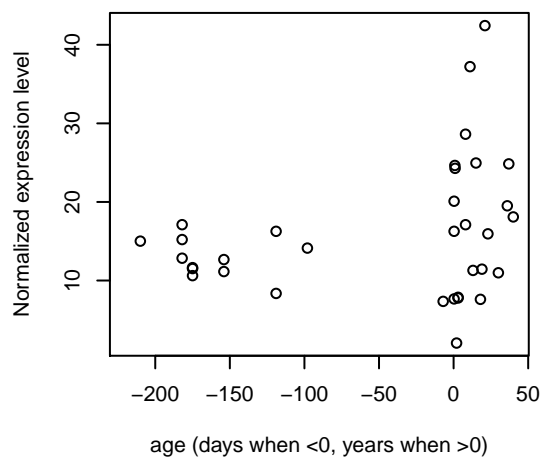

**OPA1 (P=0.4109, Diff = -2.63)**  
**mediodorsal nucleus of thalamus**

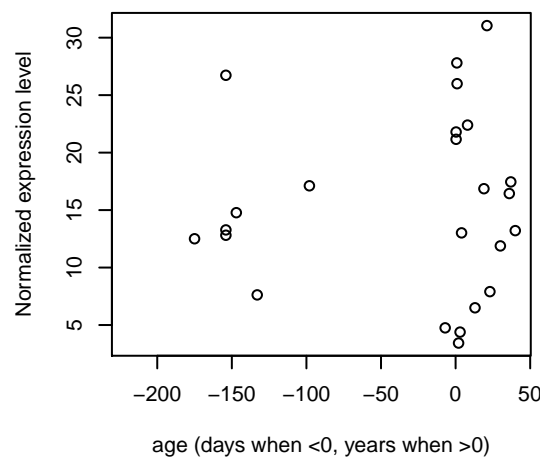

**OPA1 (P=0.5072, Diff = -1.52)**  
**orbital frontal cortex**

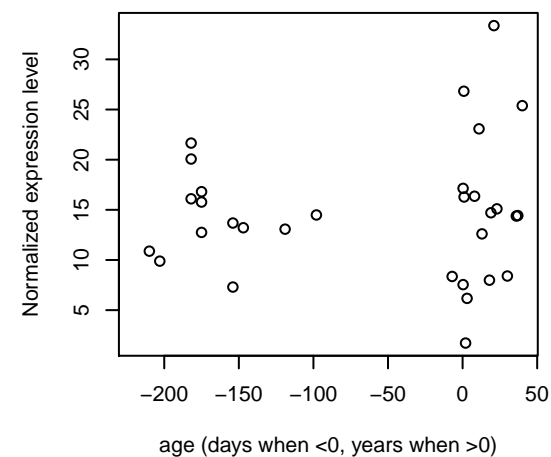

**OPA1 (P=0.0036, Diff = -5.93)**  
**posterior superior temporal cortex**

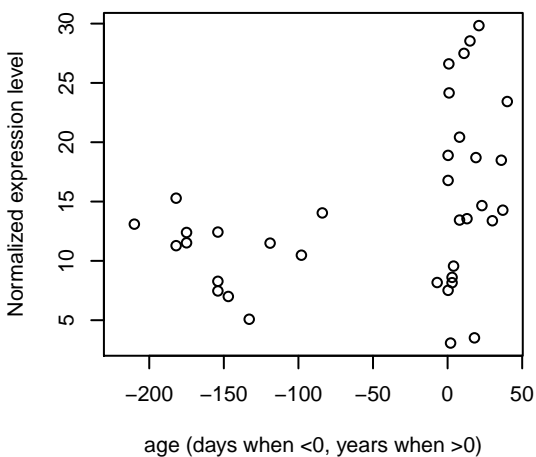

**OPA1 (P=0.0277, Diff = -5.18)**  
**posteroventral parietal cortex**

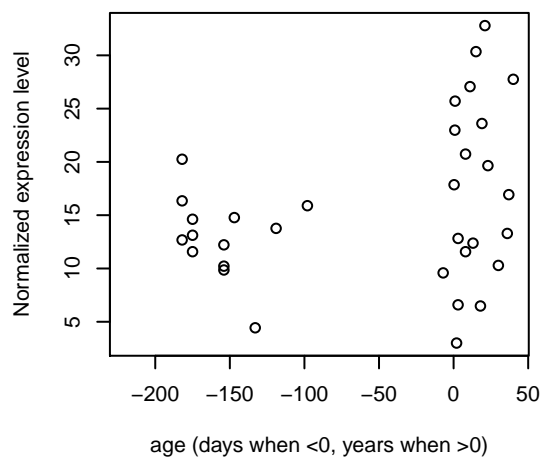

**OPA1 (P=0.1434, Diff = -3.54)**  
**primary auditory cortex**

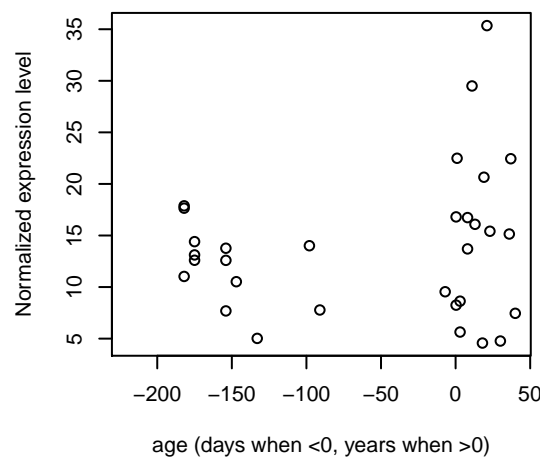

**OPA1 (P=0.8477, Diff = 0.38)**  
**primary motor cortex**

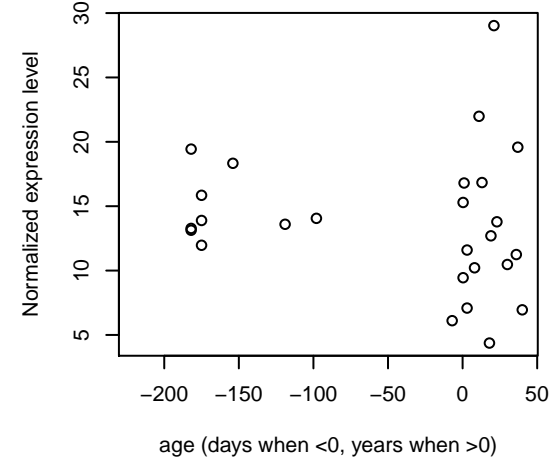

**OPA1 (P=0.3554, Diff = -2.43)**  
**primary somatosensory cortex**

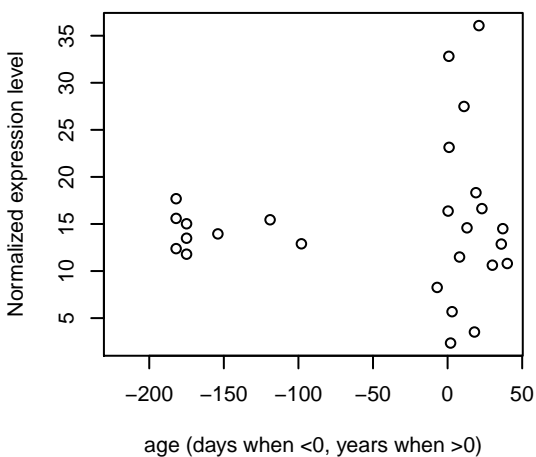

**OPA1 (P=0.0081, Diff = -5.58)**  
**primary visual cortex**

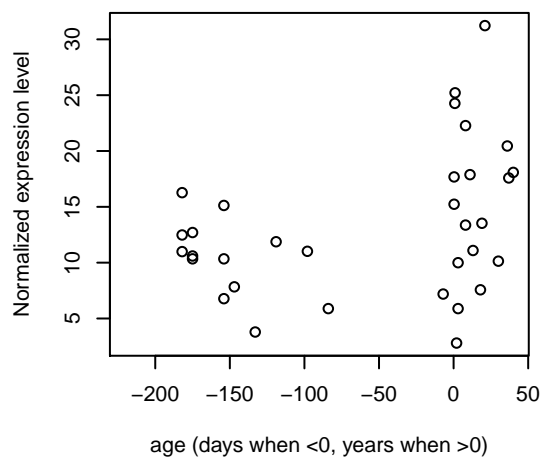

**OPA1 (P=0.8291, Diff = -0.52)**  
**striatum**

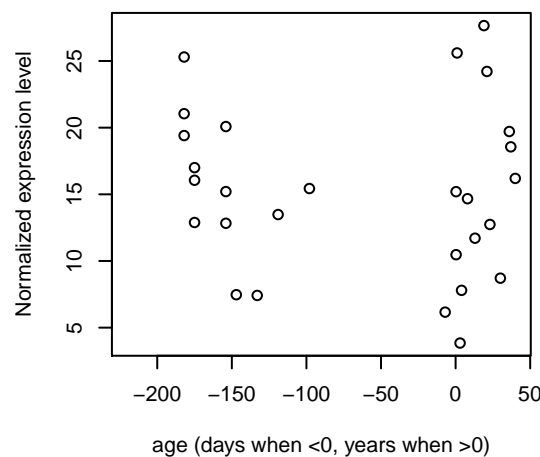

**OPA1 (P=4e-04, Diff = 0.19)**  
**prefrontal cortex**

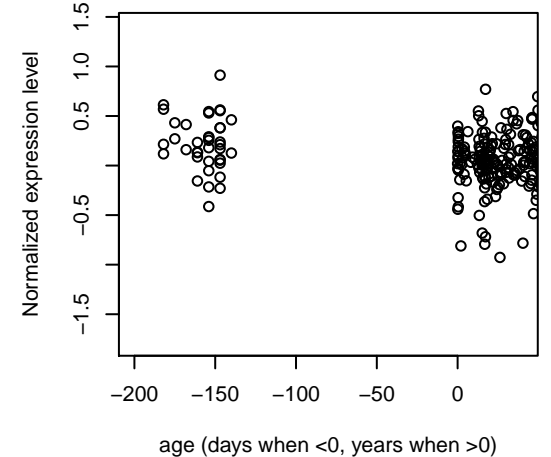

**ZMAT4 (P=5e-04, Diff = -1.4)**  
**amygdaloid complex**

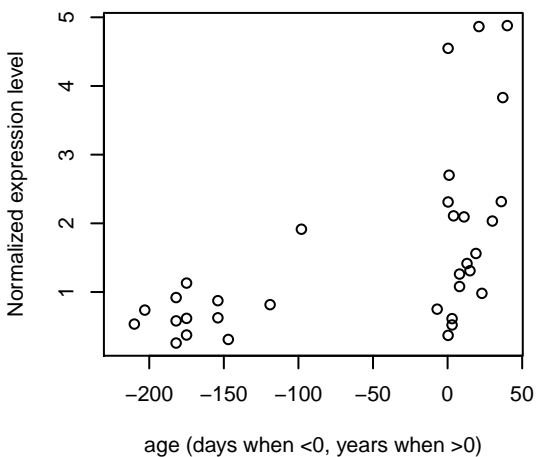

**ZMAT4 (P=0, Diff = -3.22)**  
**anterior cingulate cortex**

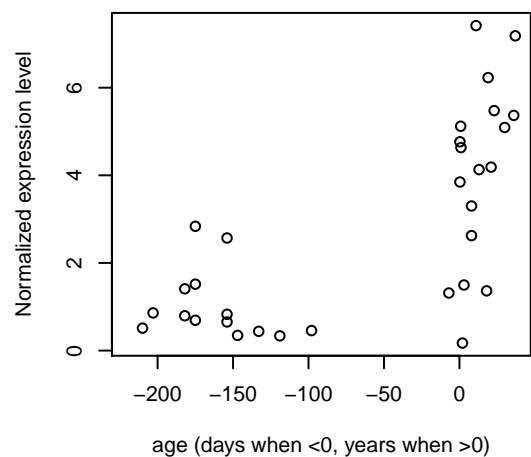

**ZMAT4 (P=0, Diff = 2.93)**  
**cerebellar cortex**

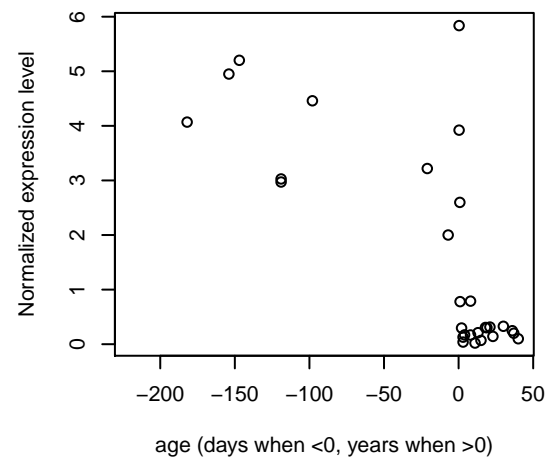

**ZMAT4 (P=0, Diff = -4.09)**  
**dorsolateral prefrontal cortex**

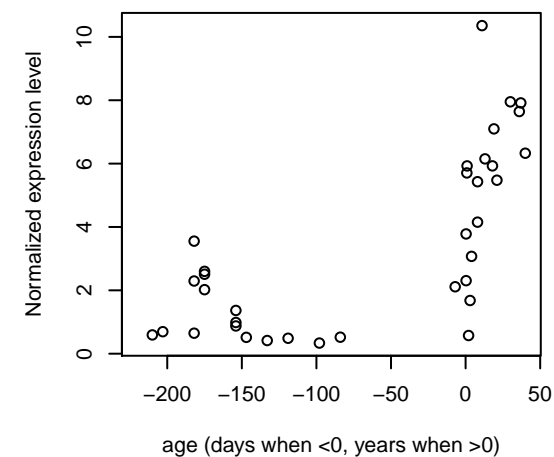

**ZMAT4 (P=1e-04, Diff = -3.09)**  
**hippocampus**

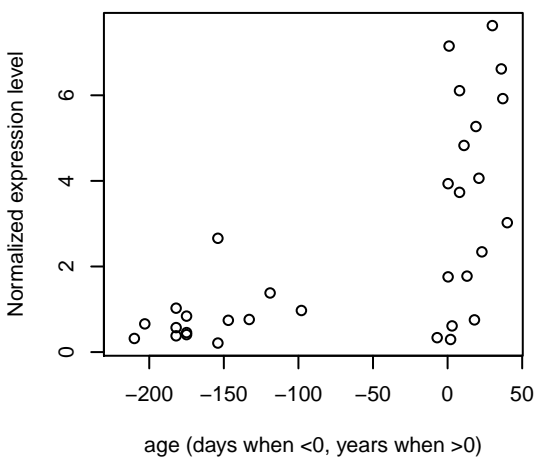

**ZMAT4 (P=0, Diff = -3.5)**  
**inferolateral temporal cortex**

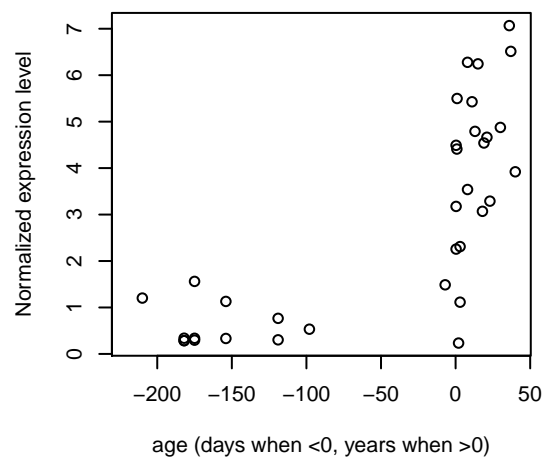

**ZMAT4 (P=0.4064, Diff = -2.66)**  
**mediodorsal nucleus of thalamus**

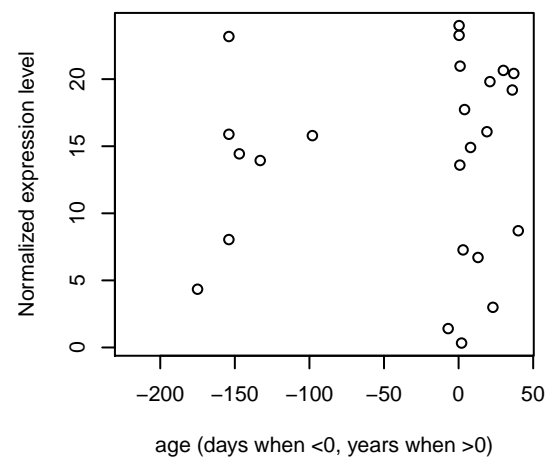

**ZMAT4 (P=0, Diff = -3.96)**  
**orbital frontal cortex**

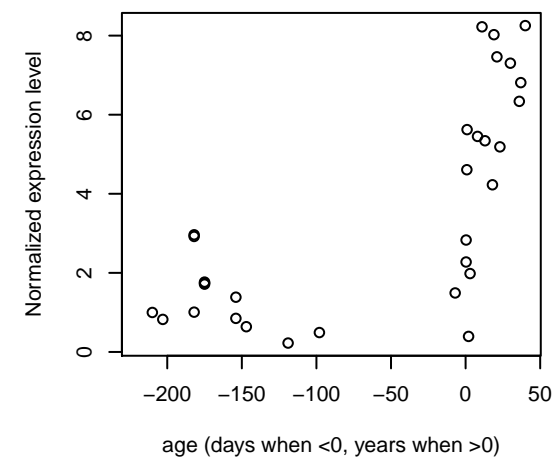

**ZMAT4 (P=0, Diff = -4.99)**  
**posterior superior temporal cortex**

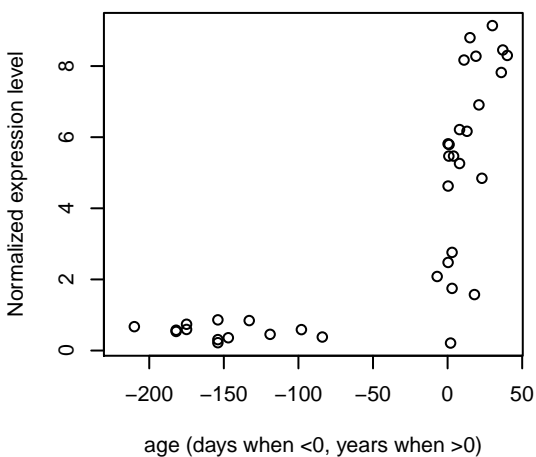

**ZMAT4 (P=0, Diff = -5.09)**  
**posteroventral parietal cortex**

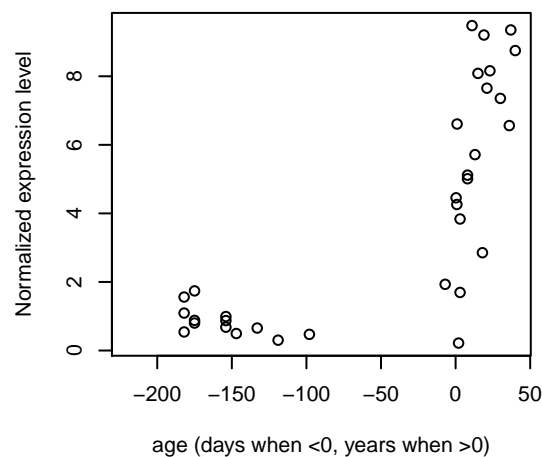

**ZMAT4 (P=0, Diff = -5.92)**  
**primary auditory cortex**

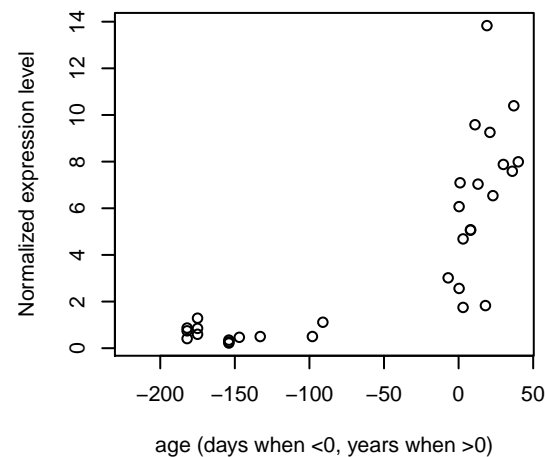

**ZMAT4 (P=0, Diff = -3.81)**  
**primary motor cortex**

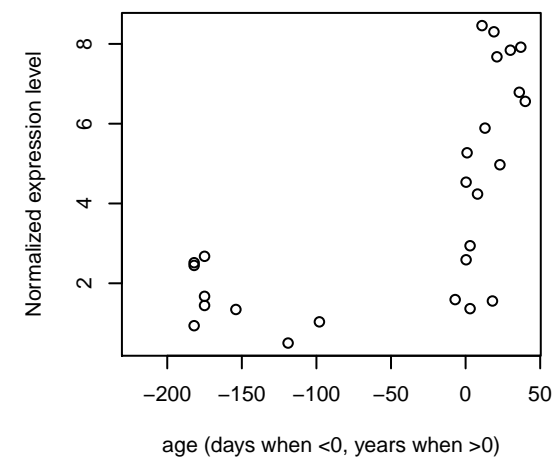

**ZMAT4 (P=0, Diff = -5.1)**  
**primary somatosensory cortex**

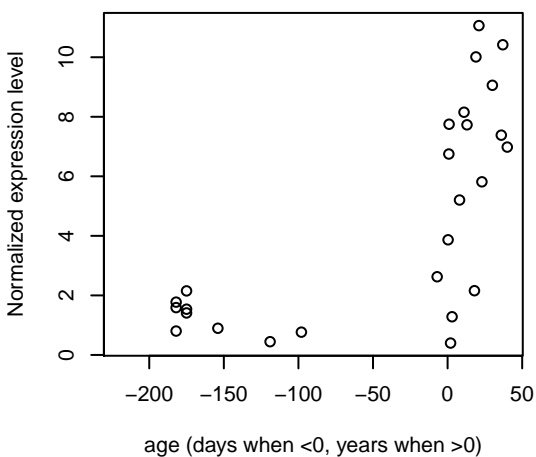

**ZMAT4 (P=0, Diff = -7.92)**  
**primary visual cortex**

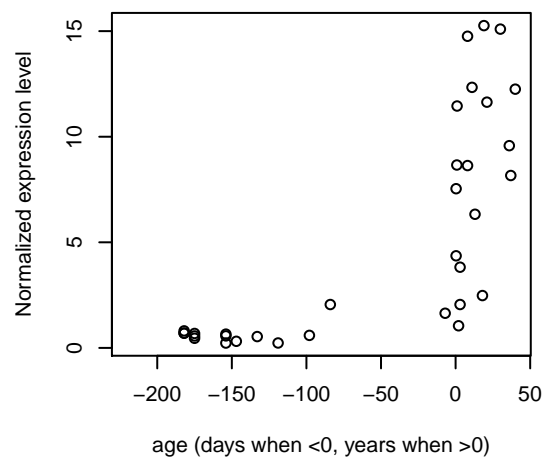

**ZMAT4 (P=0, Diff = -3.72)**  
**striatum**

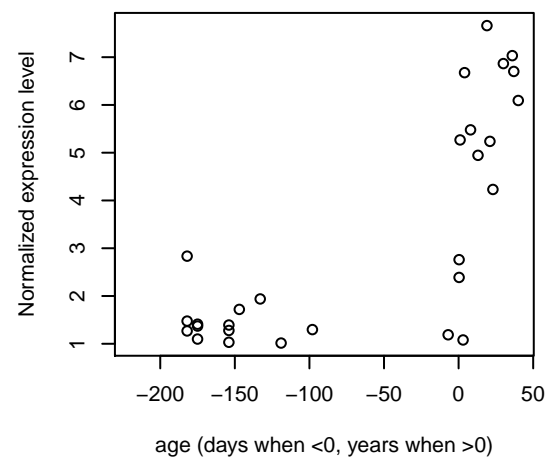

**ZMAT4 (P=0, Diff = -2.89)**  
**prefrontal cortex**

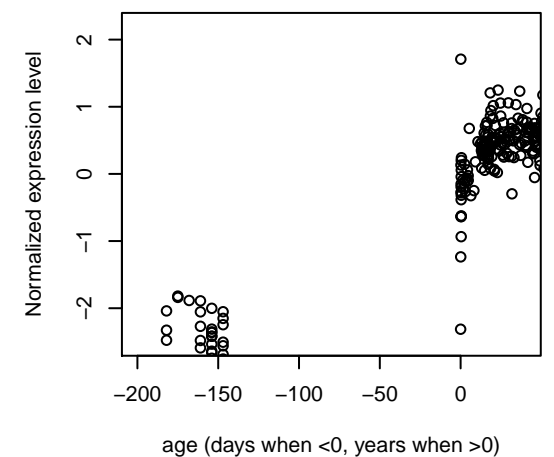

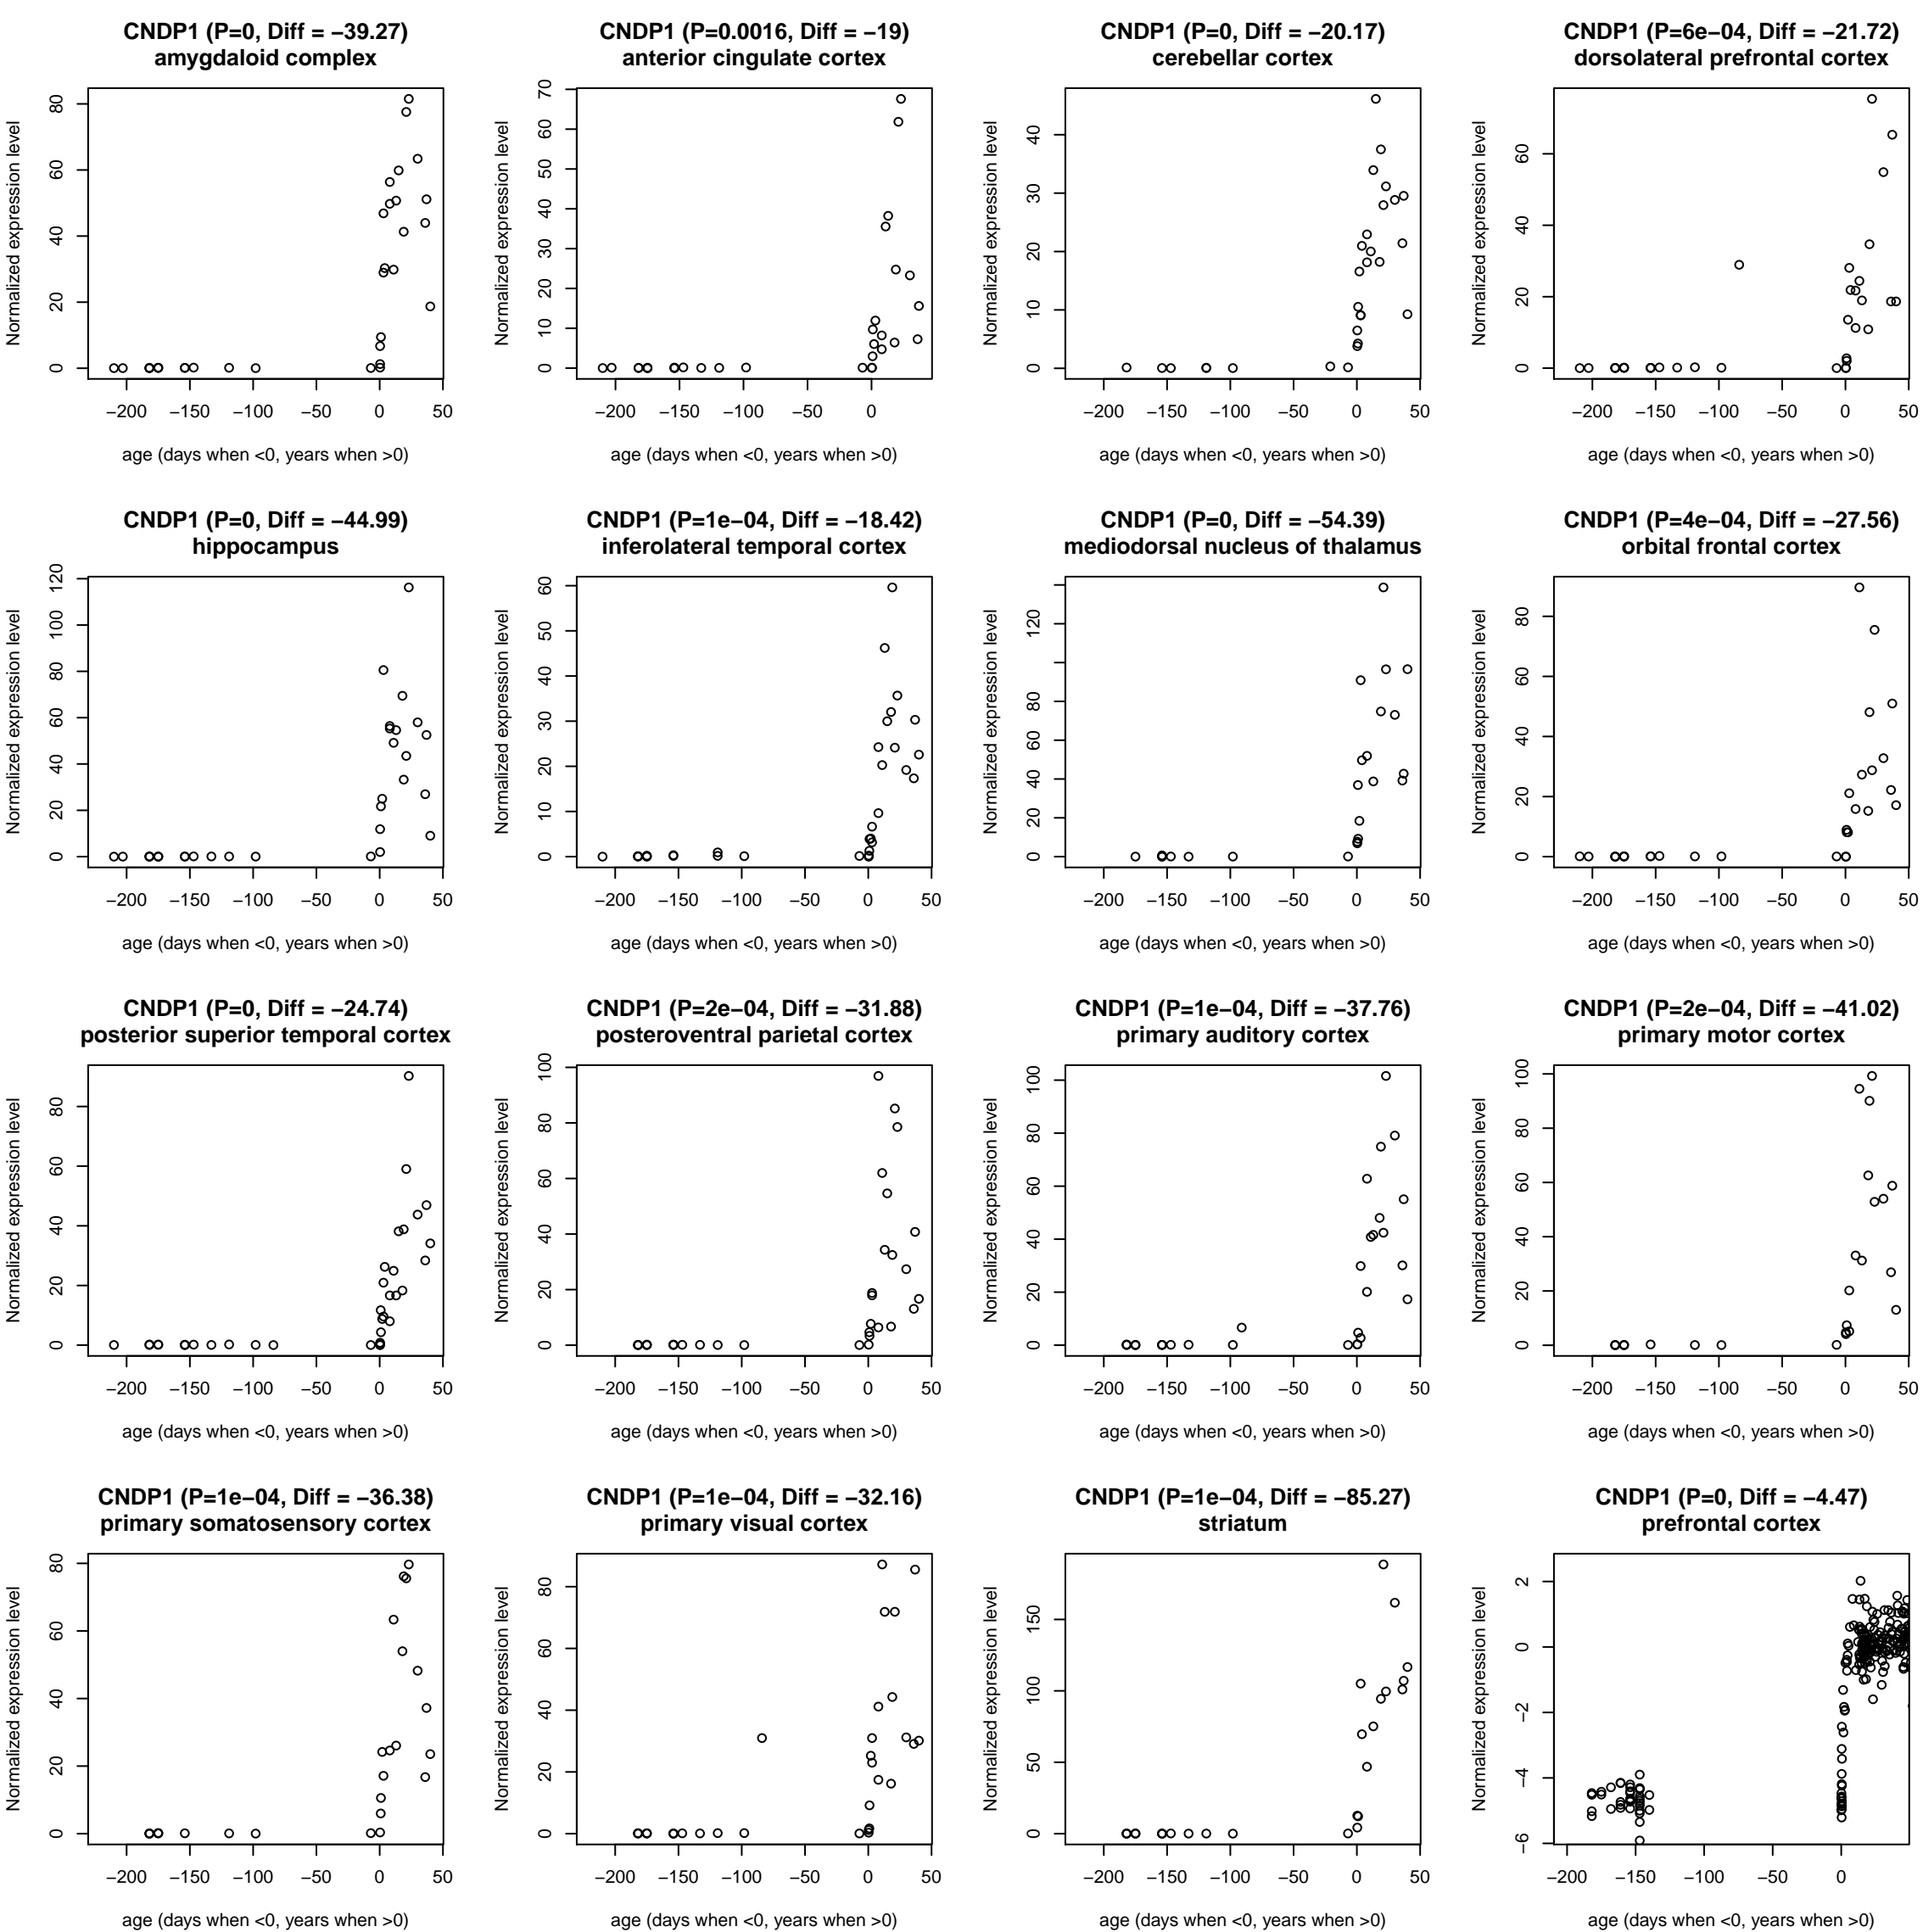

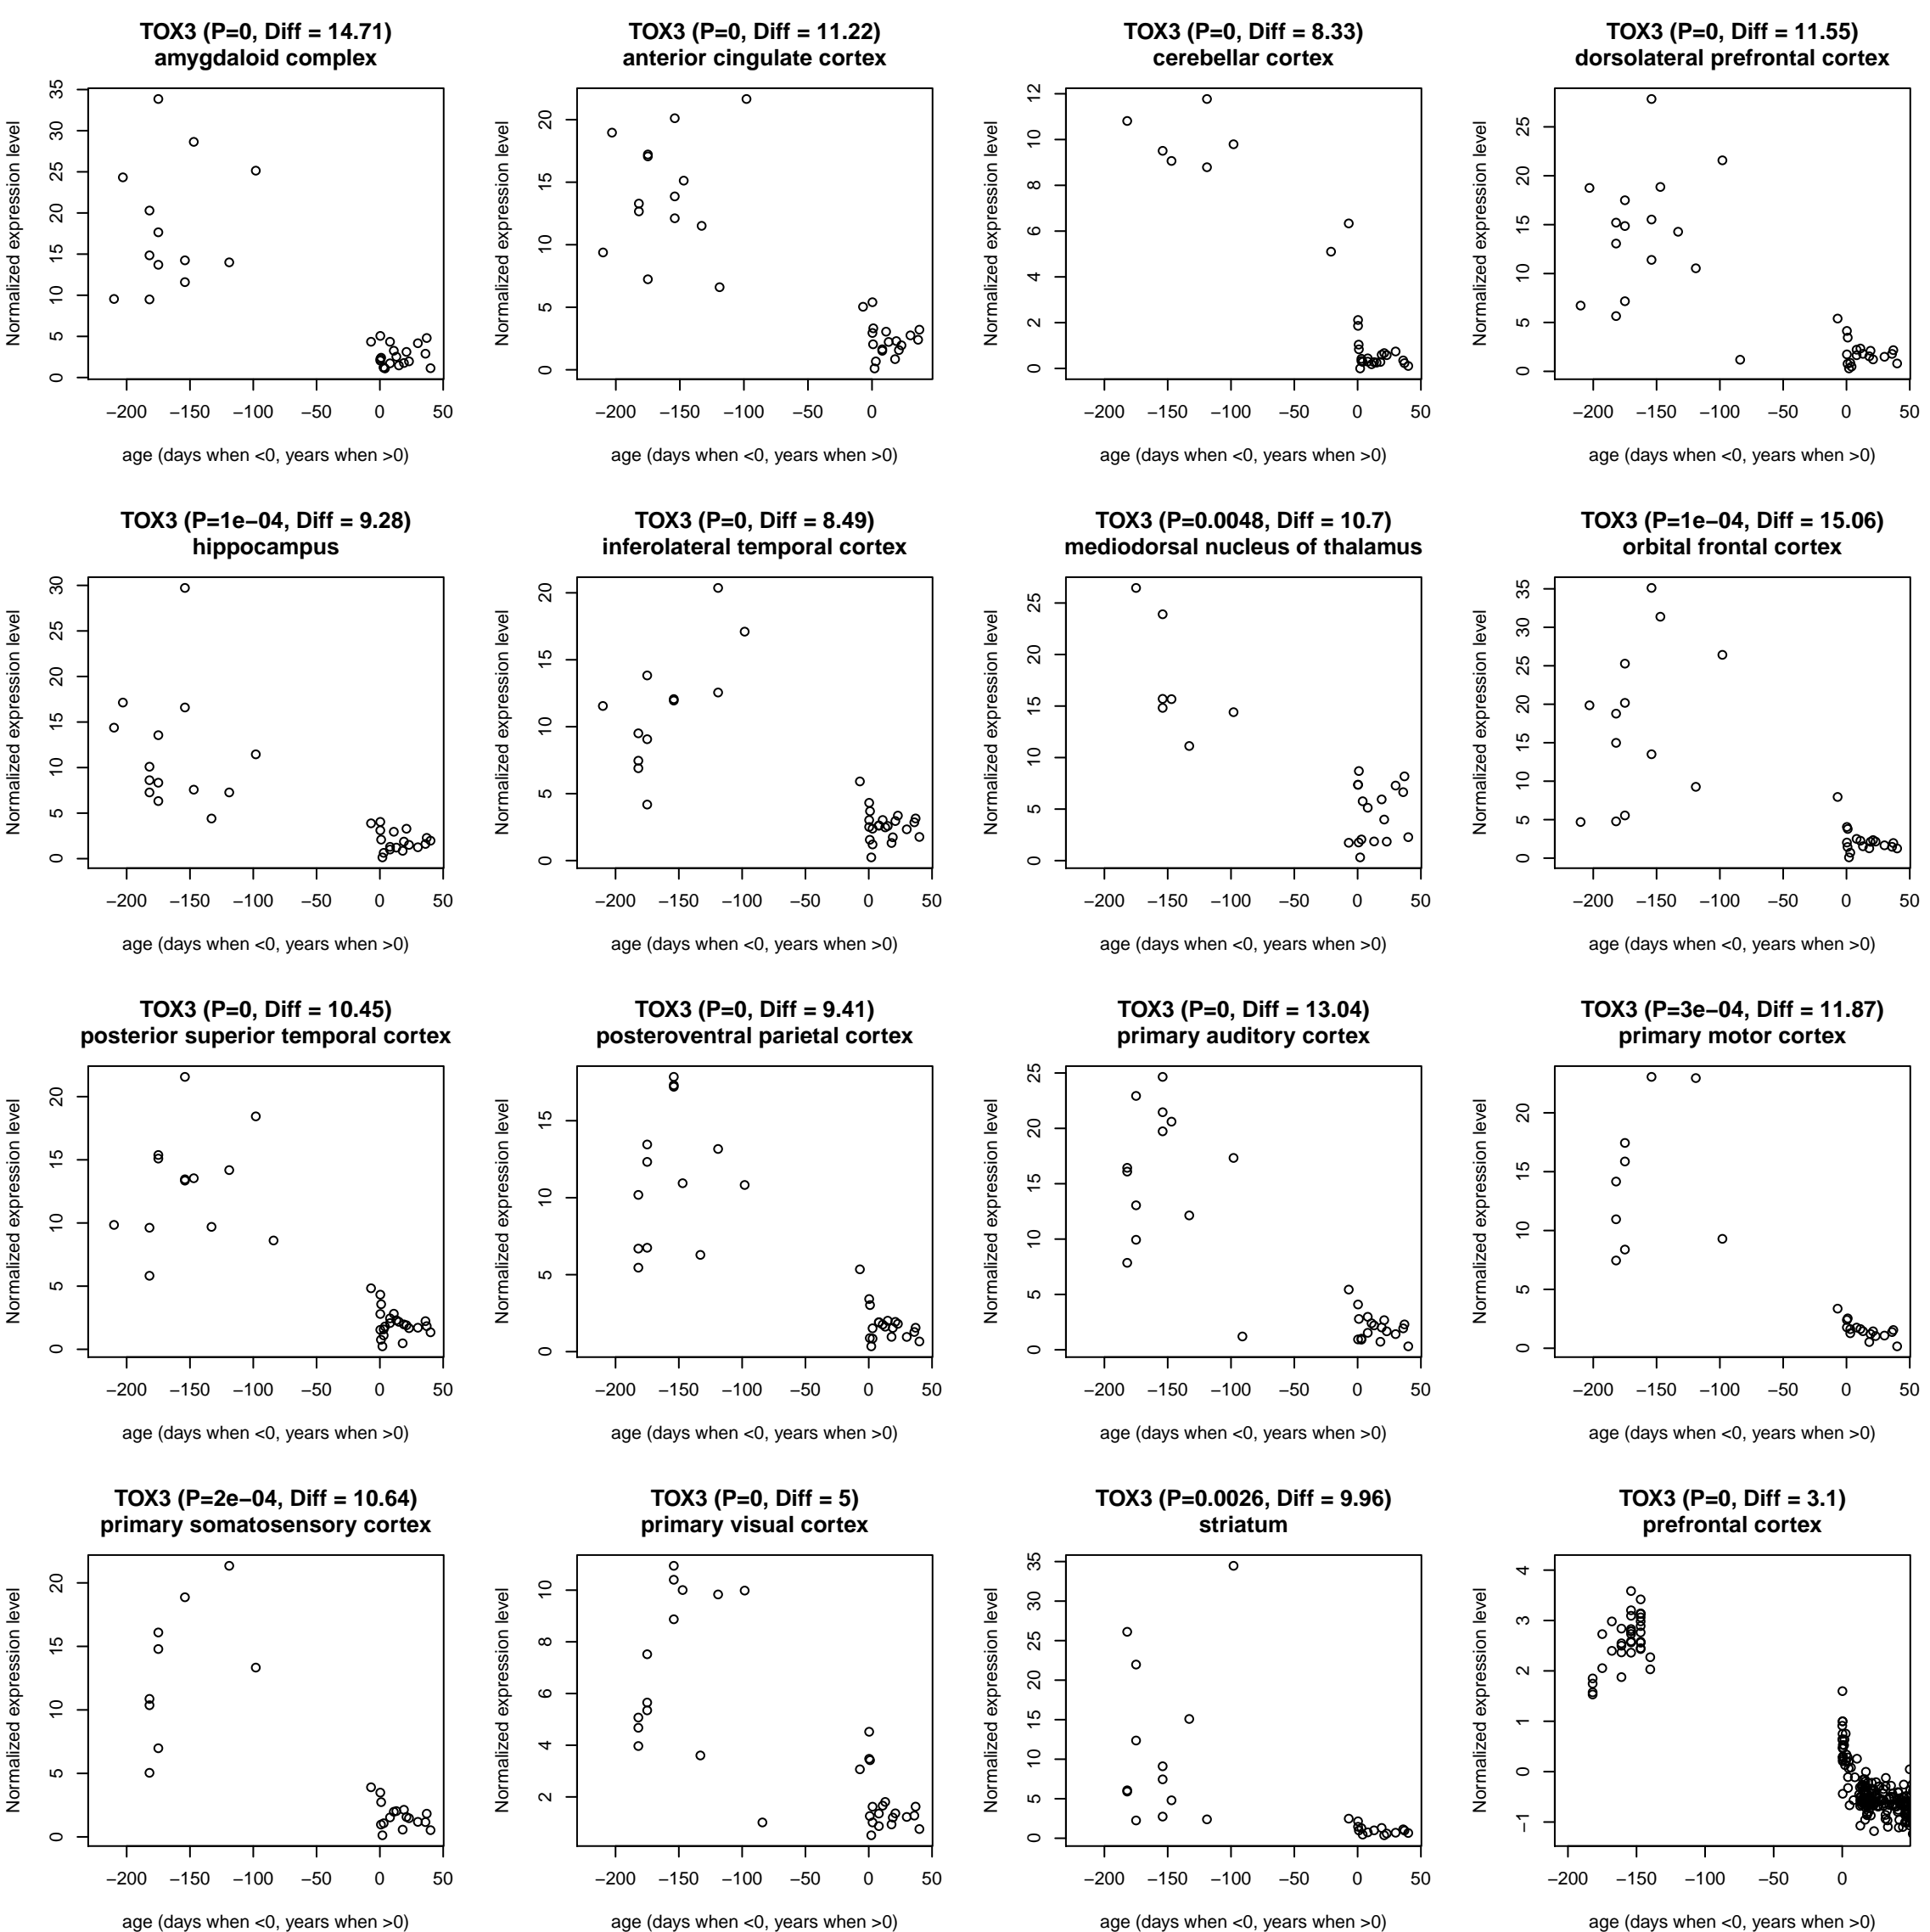

**C16orf62 (P=0.5505, Diff = -0.32)**  
**amygdaloid complex**

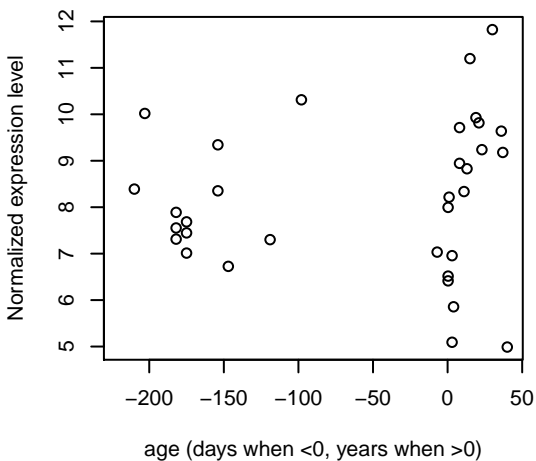

**C16orf62 (P=0.2489, Diff = -0.66)**  
**anterior cingulate cortex**

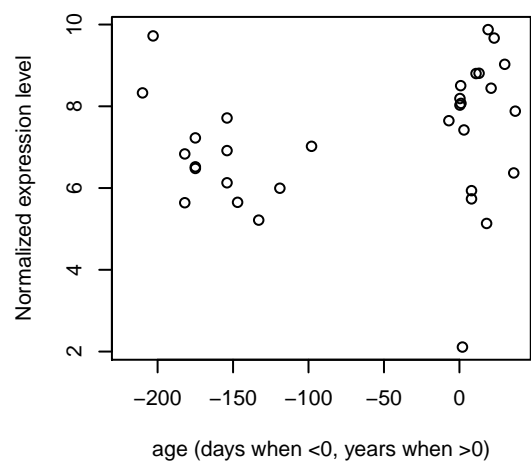

**C16orf62 (P=0.0575, Diff = 1.01)**  
**cerebellar cortex**

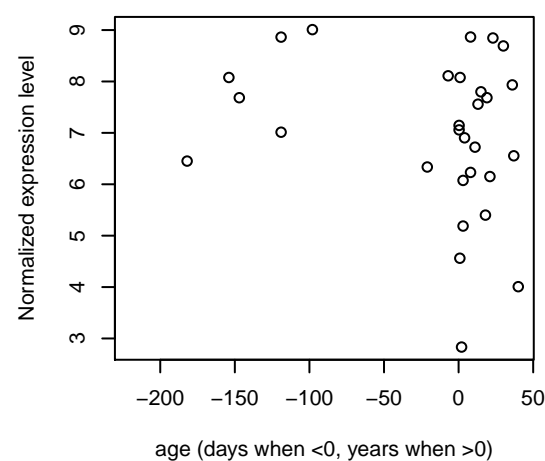

**C16orf62 (P=0.0382, Diff = -1.29)**  
**dorsolateral prefrontal cortex**

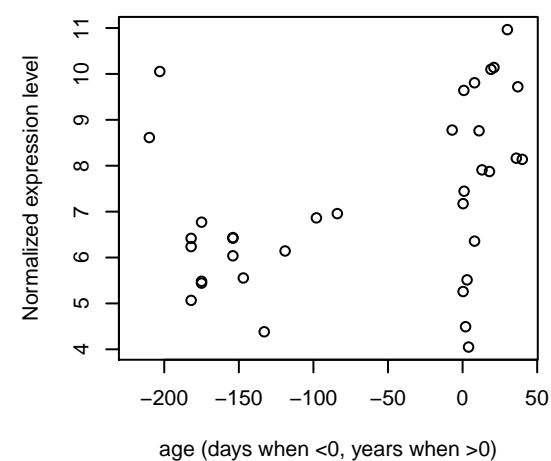

**C16orf62 (P=0.8515, Diff = 0.11)**  
**hippocampus**

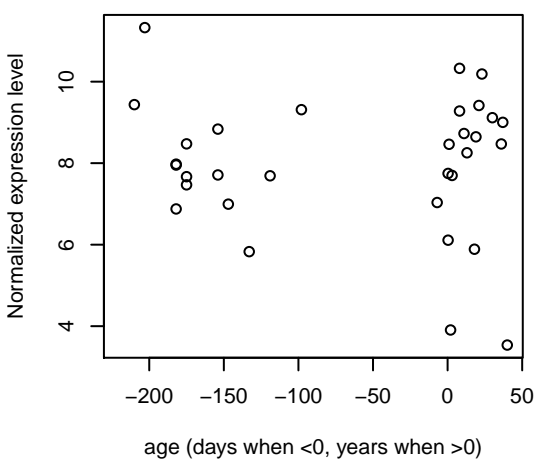

**C16orf62 (P=0.0352, Diff = -1.07)**  
**inferolateral temporal cortex**

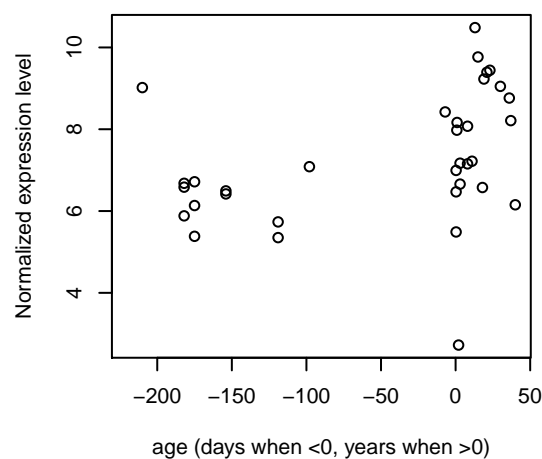

**C16orf62 (P=0.0311, Diff = -1.87)**  
**mediodorsal nucleus of thalamus**

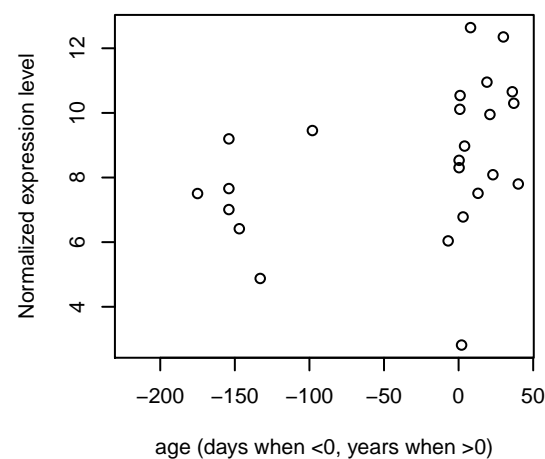

**C16orf62 (P=0.0567, Diff = -1.21)**  
**orbital frontal cortex**

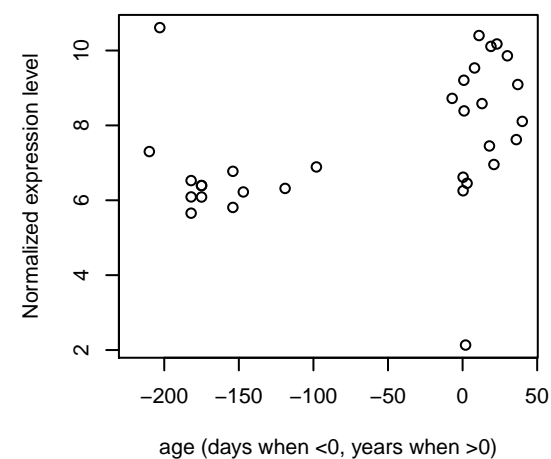

**C16orf62 (P=0.0159, Diff = -1.49)**  
**posterior superior temporal cortex**

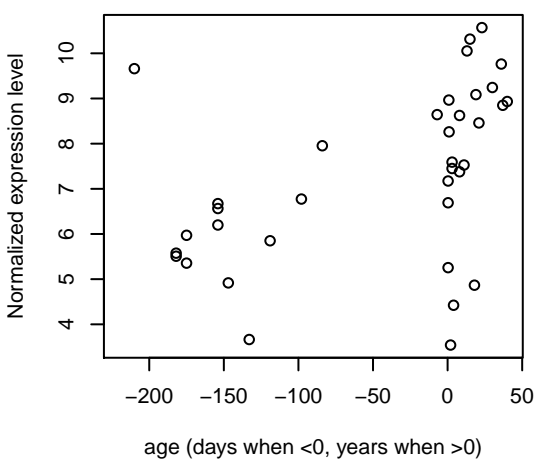

**C16orf62 (P=5e-04, Diff = -2)**  
**posteroventral parietal cortex**

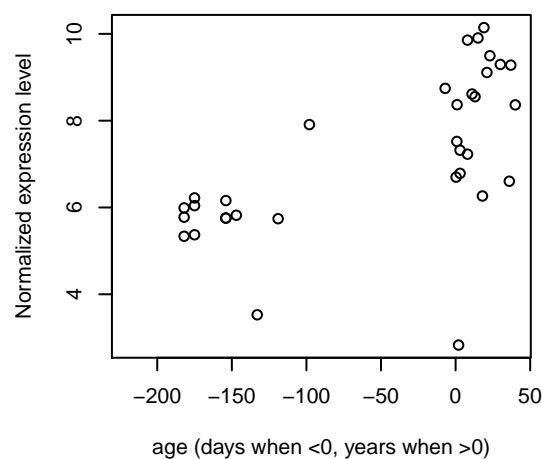

**C16orf62 (P=0.0018, Diff = -1.64)**  
**primary auditory cortex**

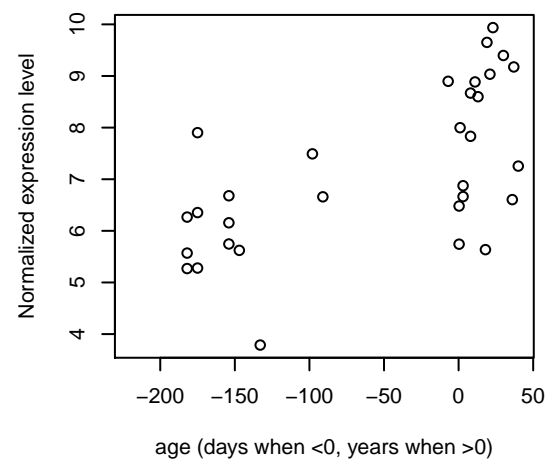

**C16orf62 (P=1e-04, Diff = -2.13)**  
**primary motor cortex**

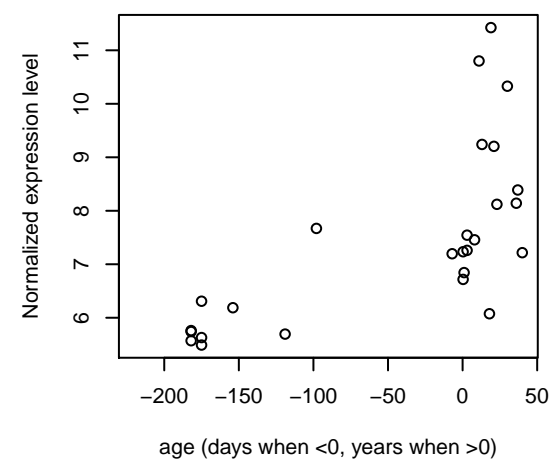

**C16orf62 (P=2e-04, Diff = -2.03)**  
**primary somatosensory cortex**

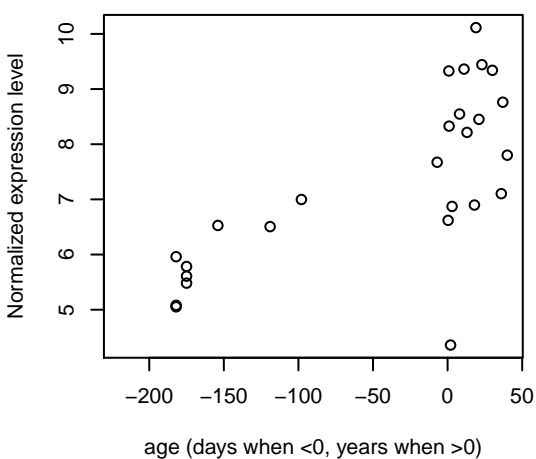

**C16orf62 (P=0.0154, Diff = -1.29)**  
**primary visual cortex**

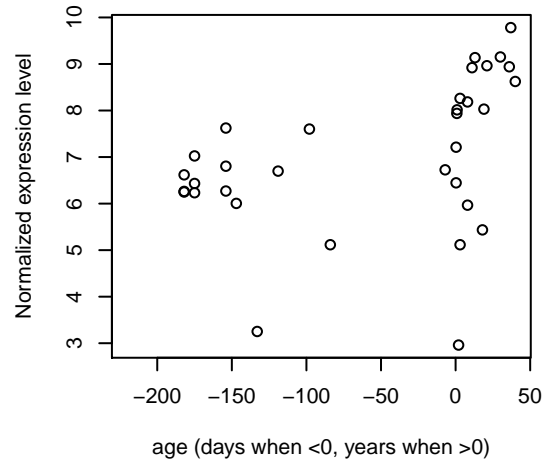

**C16orf62 (P=0.1598, Diff = -0.93)**  
**striatum**

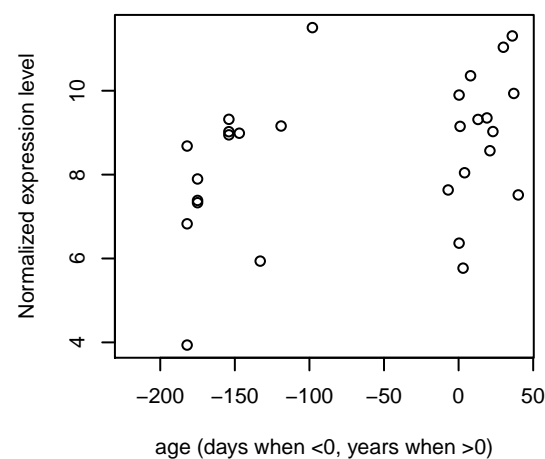

**C16orf62 (P=0, Diff = -0.49)**  
**prefrontal cortex**

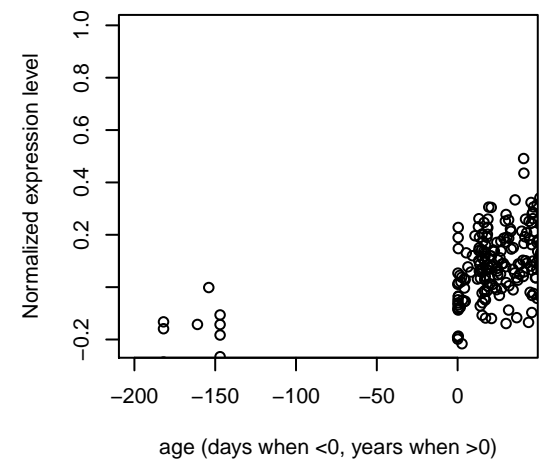

**SLC35F4 (P=0.4822, Diff = 0.08)**  
**amygdaloid complex**

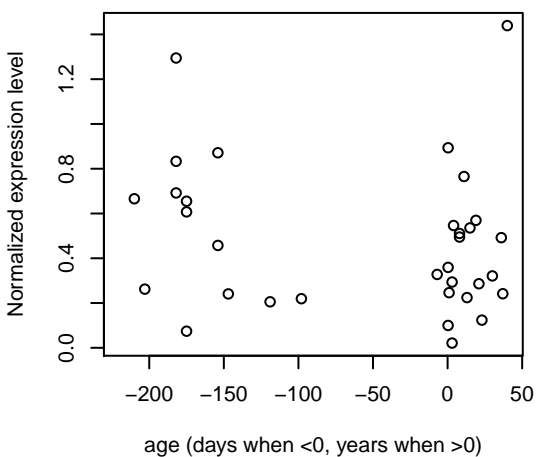

**SLC35F4 (P=0.3738, Diff = -0.09)**  
**anterior cingulate cortex**

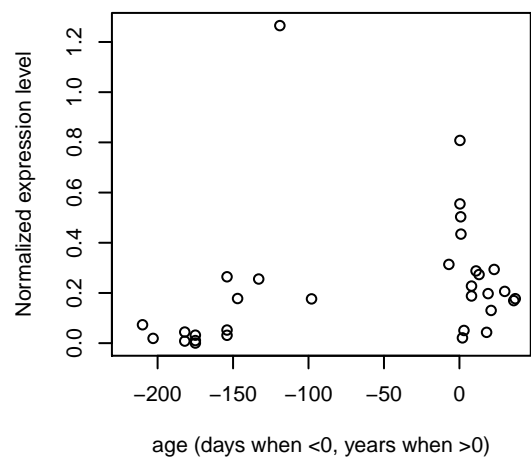

**SLC35F4 (P=0, Diff = -3.27)**  
**cerebellar cortex**

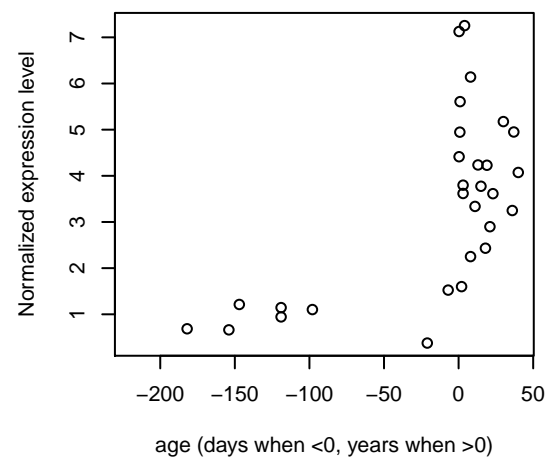

**SLC35F4 (P=0.8085, Diff = 0.02)**  
**dorsolateral prefrontal cortex**

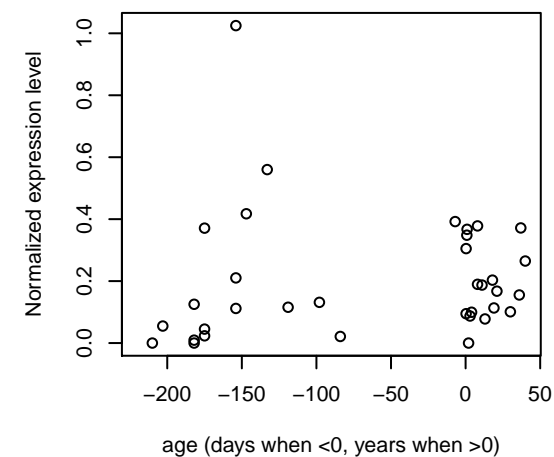

**SLC35F4 (P=0.0604, Diff = -0.12)**  
**hippocampus**

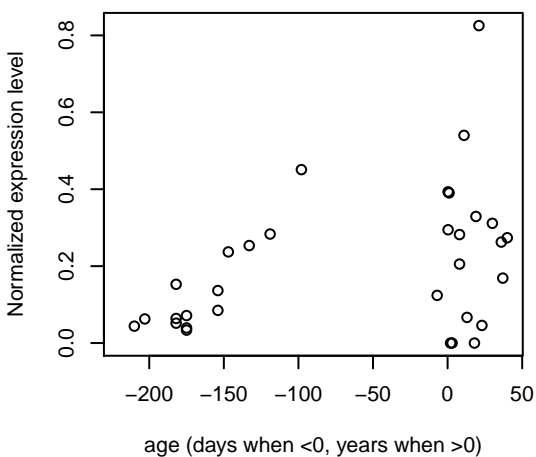

**SLC35F4 (P=0.0181, Diff = -0.11)**  
**inferolateral temporal cortex**

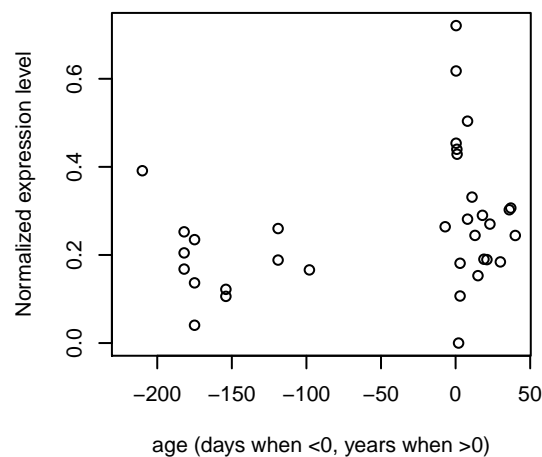

**SLC35F4 (P=0.086, Diff = 0.17)**  
**mediodorsal nucleus of thalamus**

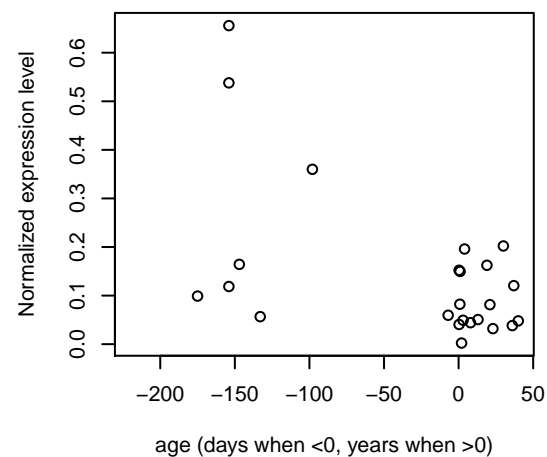

**SLC35F4 (P=0.8281, Diff = -0.01)**  
**orbital frontal cortex**

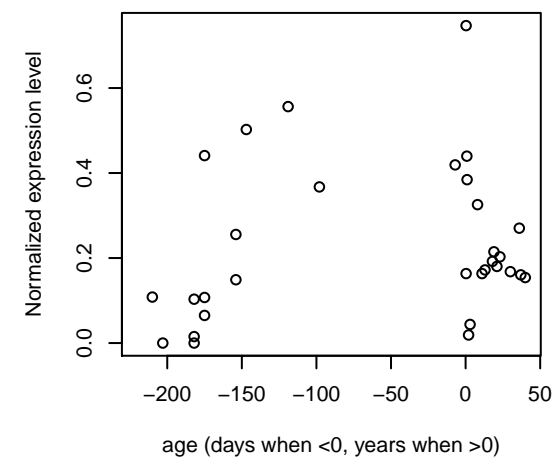

**SLC35F4 (P=0.1283, Diff = -0.08)**  
**posterior superior temporal cortex**

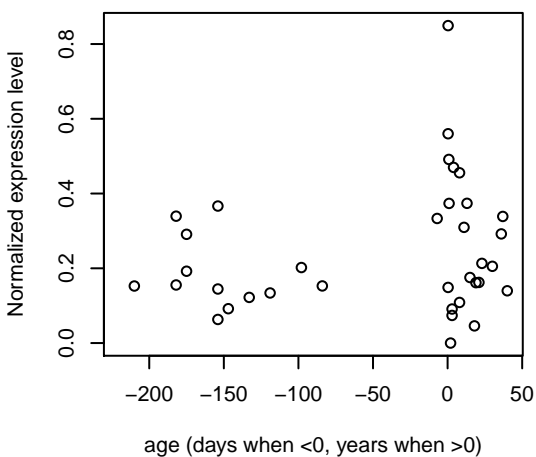

**SLC35F4 (P=0.3076, Diff = -0.07)**  
**posteroventral parietal cortex**

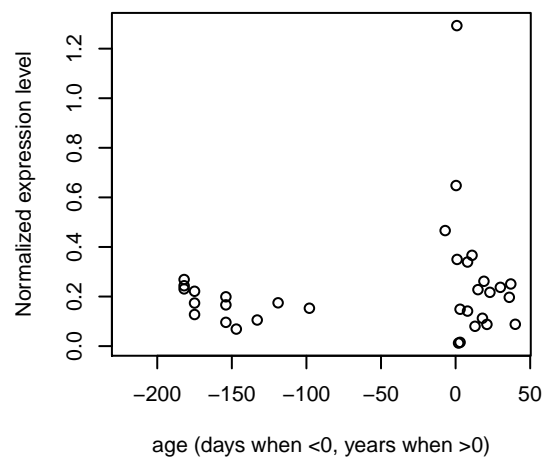

**SLC35F4 (P=0.8216, Diff = -0.01)**  
**primary auditory cortex**

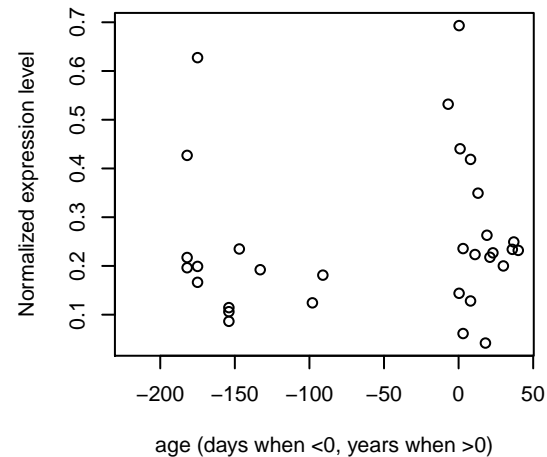

**SLC35F4 (P=0.8647, Diff = -0.02)**  
**primary motor cortex**

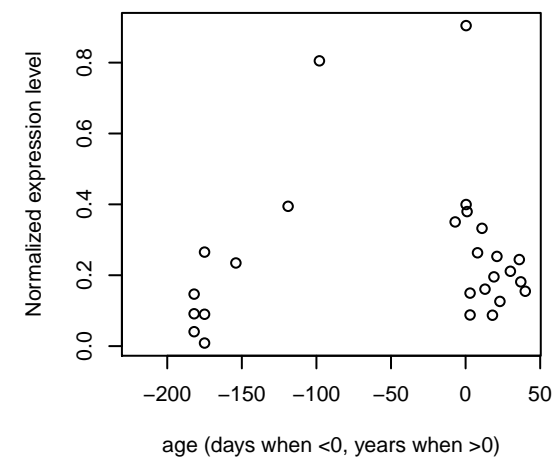

**SLC35F4 (P=0.0445, Diff = -0.1)**  
**primary somatosensory cortex**

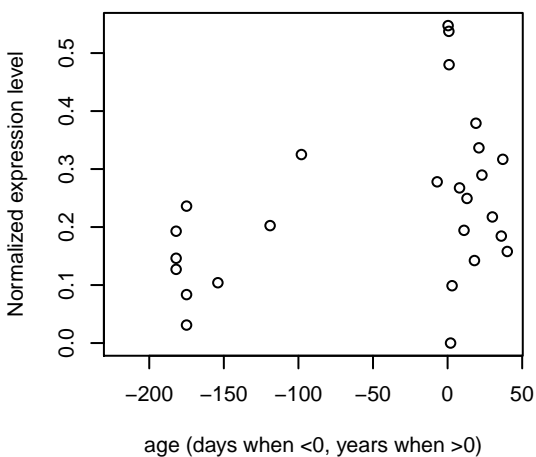

**SLC35F4 (P=0.0081, Diff = -0.34)**  
**primary visual cortex**

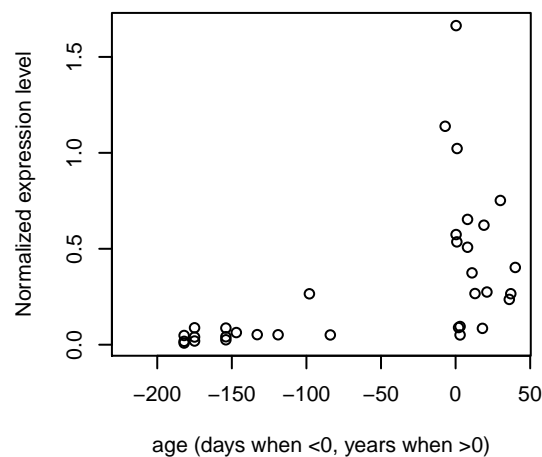

**SLC35F4 (P=5e-04, Diff = 0.72)**  
**striatum**

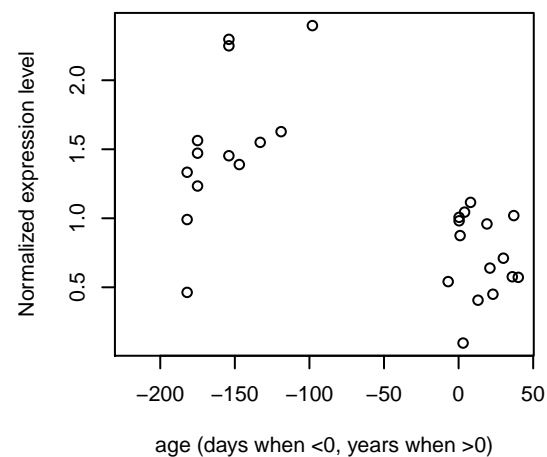

**SLC35F4 (P=0.0025, Diff = 0.34)**  
**prefrontal cortex**

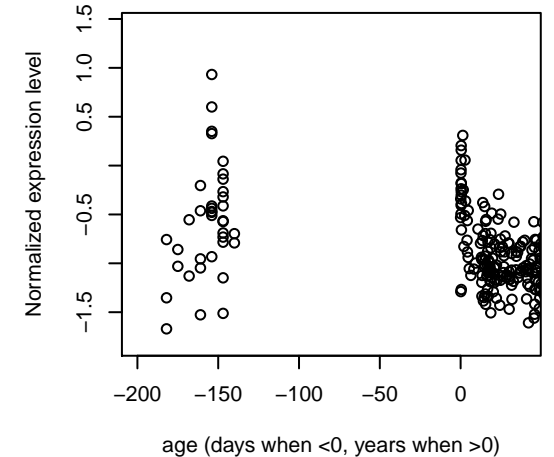

**CACNB2 (P=0, Diff = -3.48)**  
**amygdaloid complex**

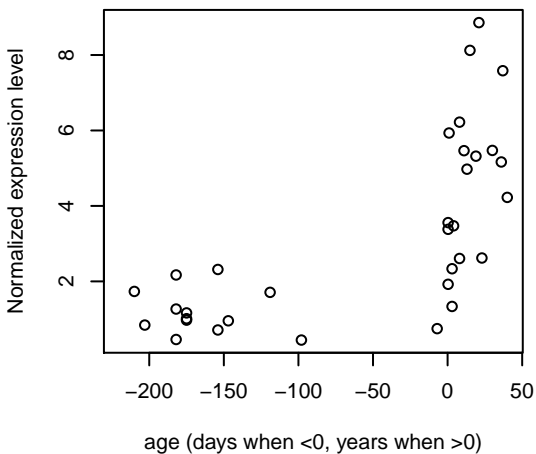

**CACNB2 (P=0, Diff = -6.44)**  
**anterior cingulate cortex**

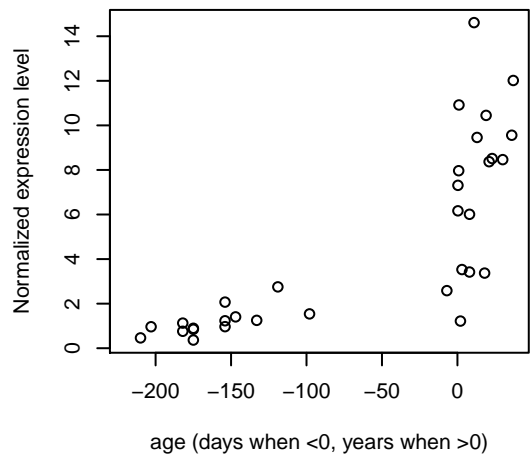

**CACNB2 (P=0, Diff = -4.28)**  
**cerebellar cortex**

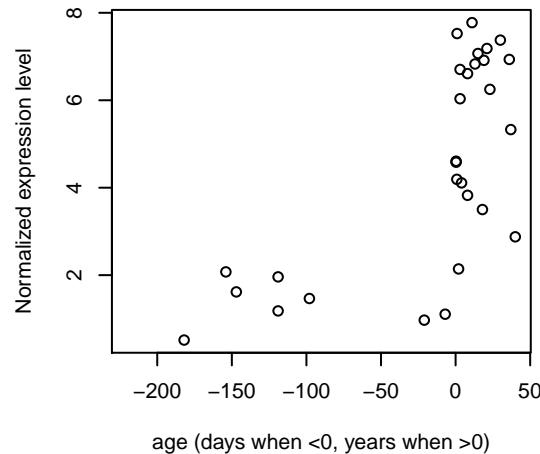

**CACNB2 (P=0, Diff = -6.63)**  
**dorsolateral prefrontal cortex**

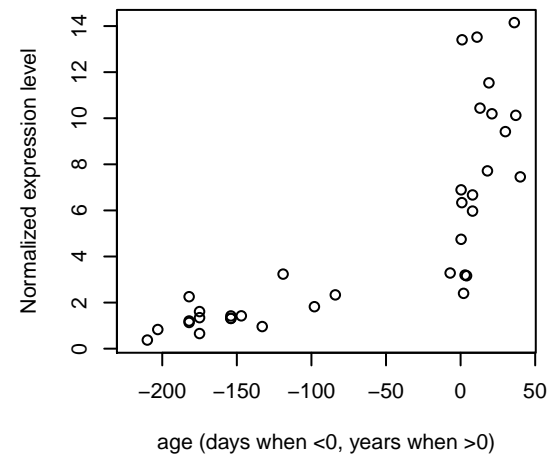

**CACNB2 (P=0, Diff = -3.08)**  
**hippocampus**

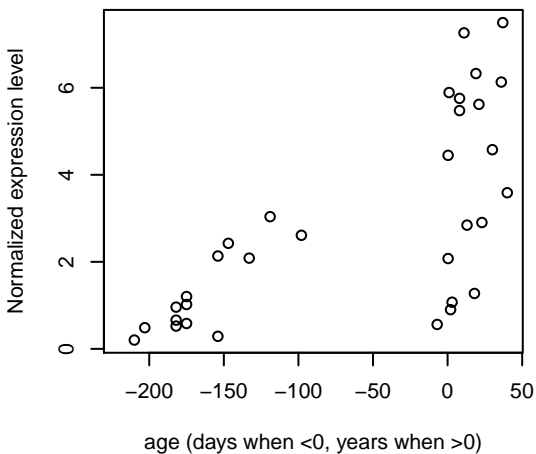

**CACNB2 (P=0, Diff = -5.45)**  
**inferolateral temporal cortex**

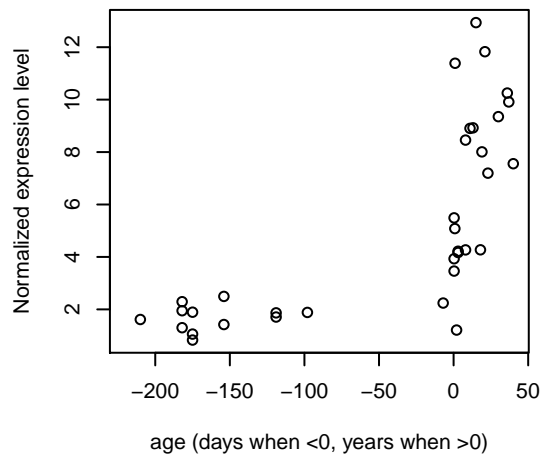

**CACNB2 (P=7e-04, Diff = -3.23)**  
**mediodorsal nucleus of thalamus**

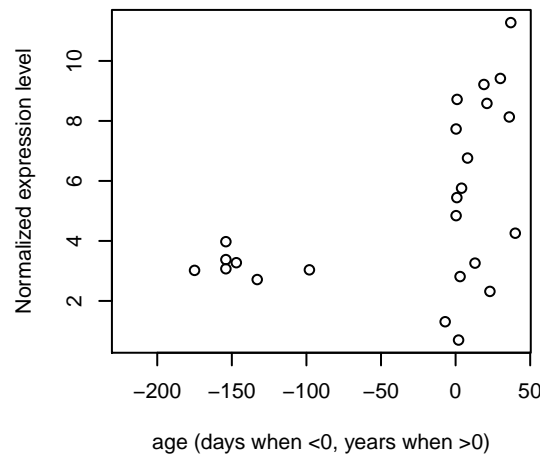

**CACNB2 (P=0, Diff = -6.5)**  
**orbital frontal cortex**

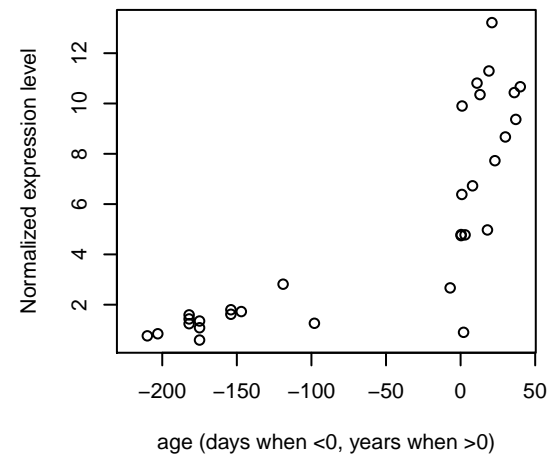

**CACNB2 (P=0, Diff = -5.34)**  
**posterior superior temporal cortex**

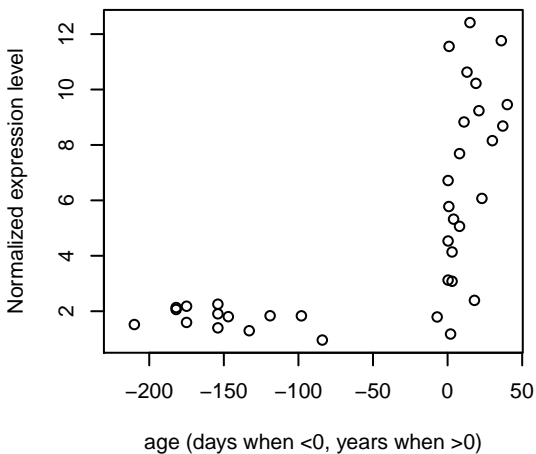

**CACNB2 (P=0, Diff = -5.97)**  
**posteroventral parietal cortex**

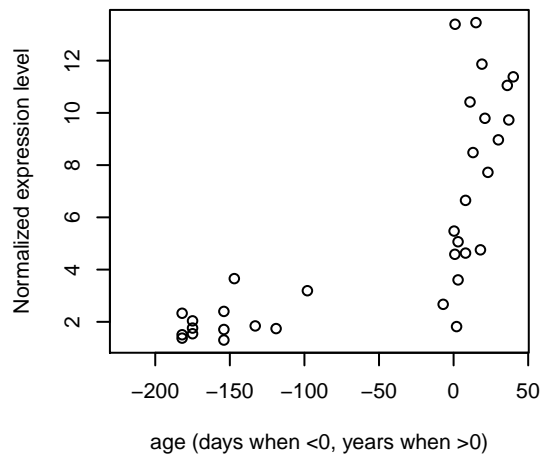

**CACNB2 (P=0, Diff = -4.71)**  
**primary auditory cortex**

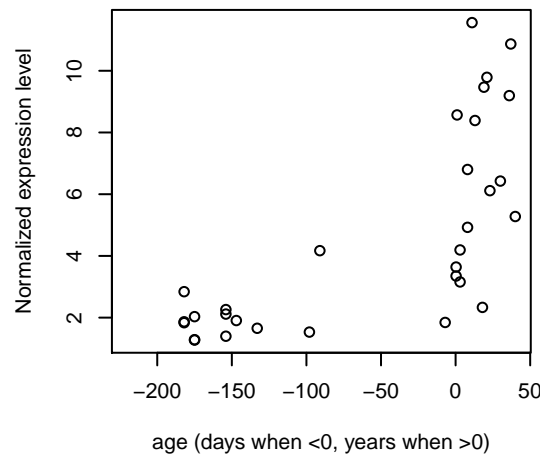

**CACNB2 (P=0, Diff = -5.54)**  
**primary motor cortex**

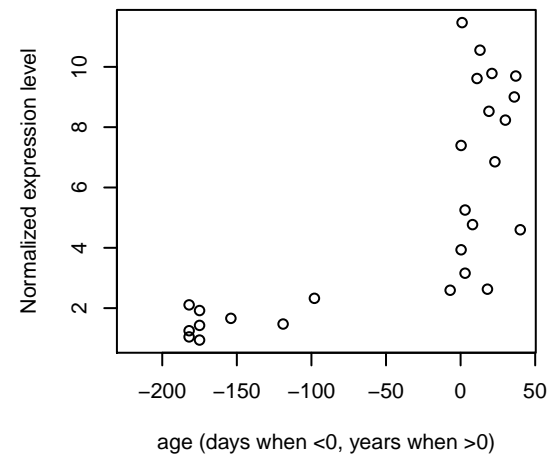

**CACNB2 (P=0, Diff = -5.5)**  
**primary somatosensory cortex**

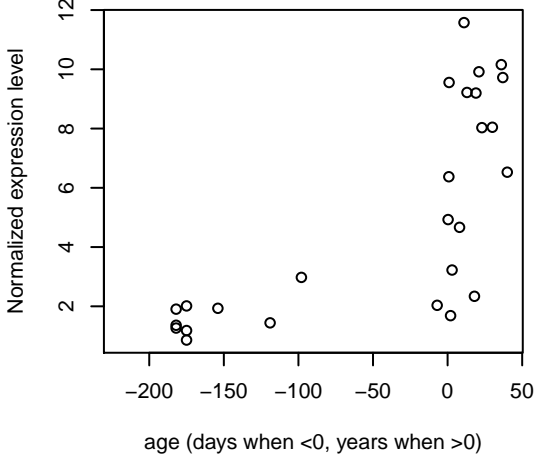

**CACNB2 (P=0, Diff = -4.29)**  
**primary visual cortex**

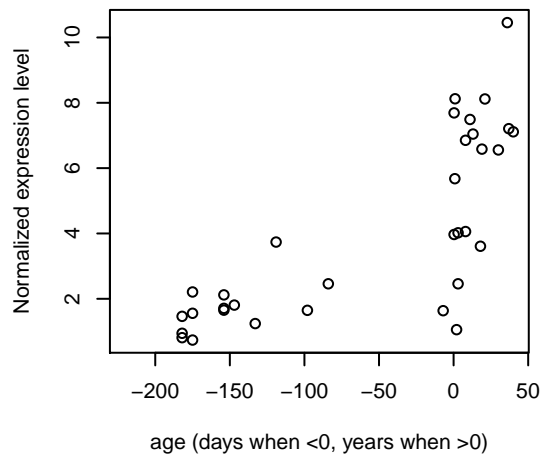

**CACNB2 (P=0.0014, Diff = -2.47)**  
**striatum**

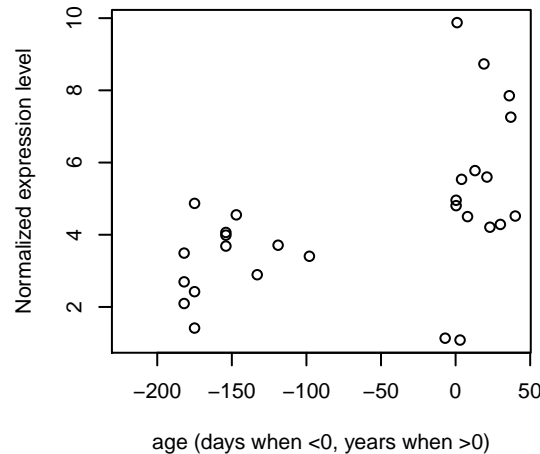

**CACNB2 (P=0, Diff = -1.36)**  
**prefrontal cortex**

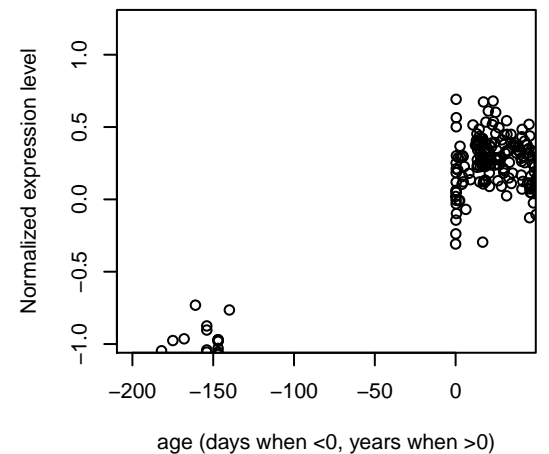



**CTH (P=0.0084, Diff = 0.97)**  
**amygdaloid complex**

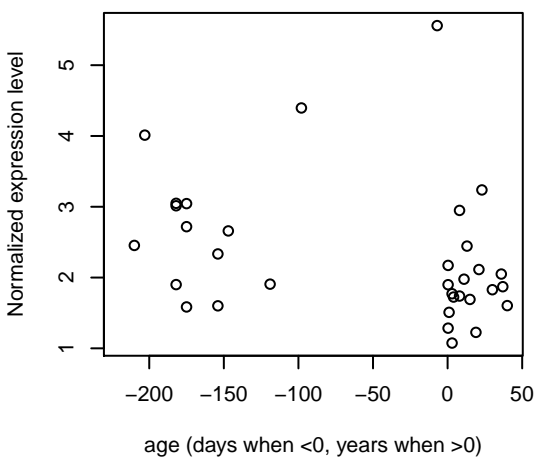

**CTH (P=0.9319, Diff = -0.03)**  
**anterior cingulate cortex**

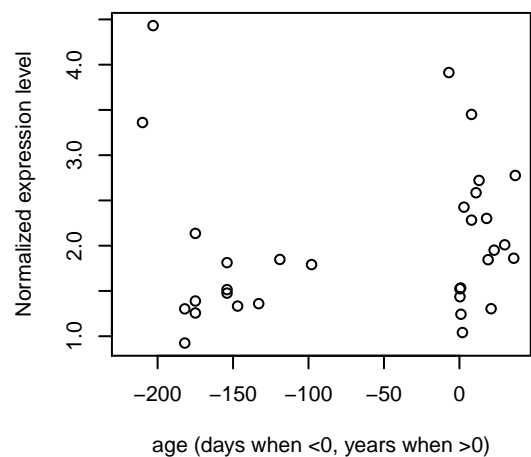

**CTH (P=0.0086, Diff = 0.44)**  
**cerebellar cortex**

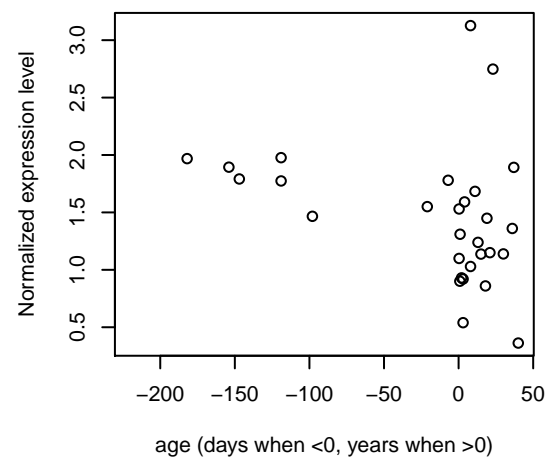

**CTH (P=0.5275, Diff = -0.15)**  
**dorsolateral prefrontal cortex**

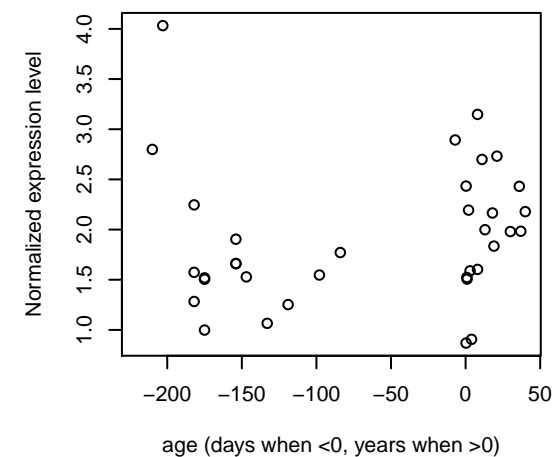

**CTH (P=0.0542, Diff = 0.6)**  
**hippocampus**

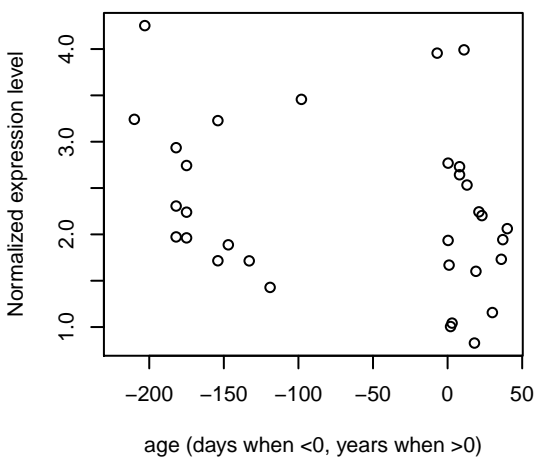

**CTH (P=0.0482, Diff = -0.46)**  
**inferolateral temporal cortex**

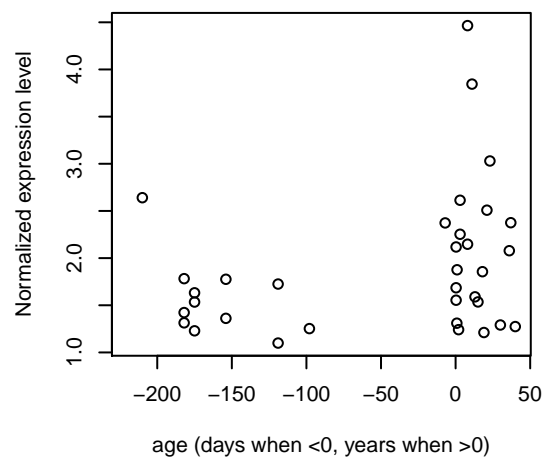

**CTH (P=0.3495, Diff = 0.47)**  
**mediodorsal nucleus of thalamus**

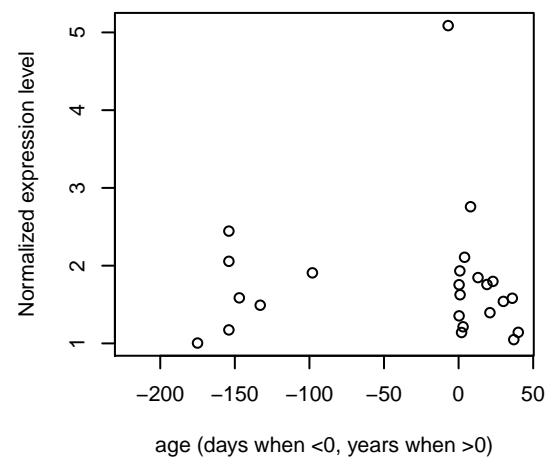

**CTH (P=0.646, Diff = 0.11)**  
**orbital frontal cortex**

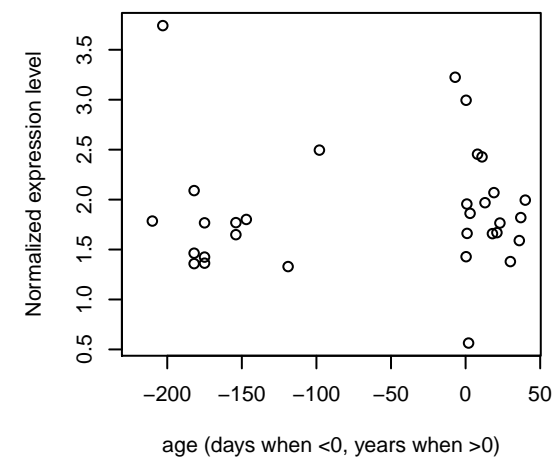

**CTH (P=0.1983, Diff = -0.32)**  
**posterior superior temporal cortex**

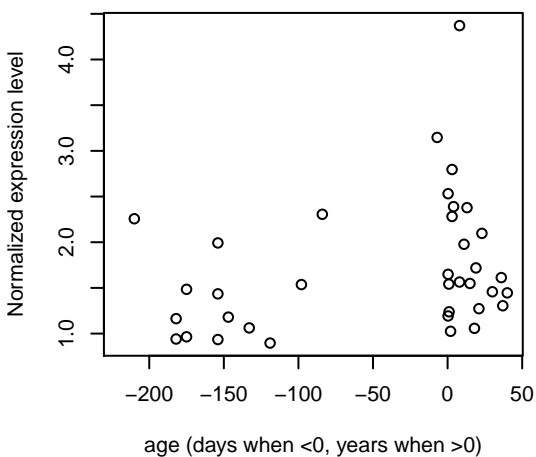

**CTH (P=8e-04, Diff = -0.67)**  
**posteroventral parietal cortex**

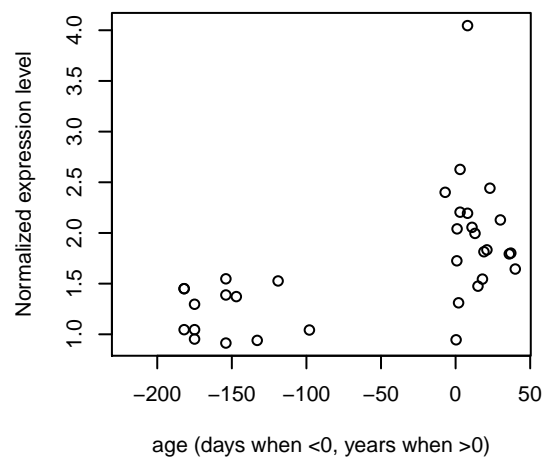

**CTH (P=0.491, Diff = -0.18)**  
**primary auditory cortex**

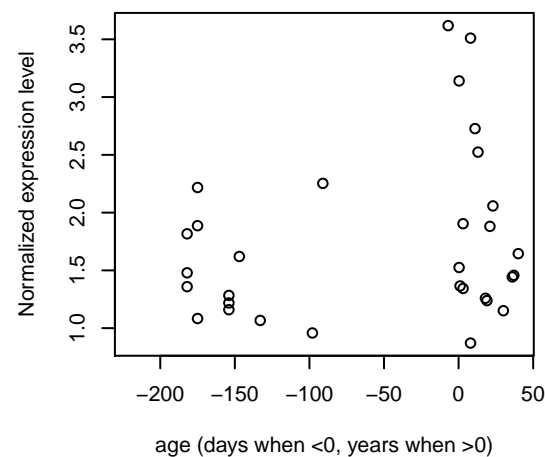

**CTH (P=0.2217, Diff = -0.44)**  
**primary motor cortex**

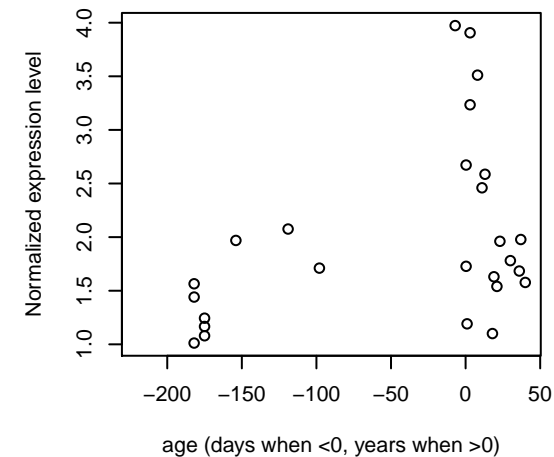

**CTH (P=0.2413, Diff = -0.29)**  
**primary somatosensory cortex**

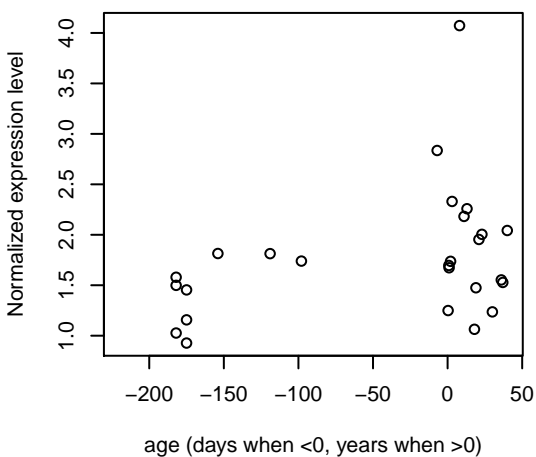

**CTH (P=0.1619, Diff = -0.32)**  
**primary visual cortex**

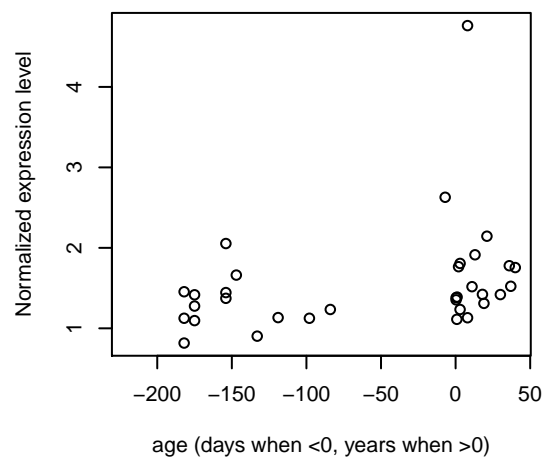

**CTH (P=0.3756, Diff = 0.27)**  
**striatum**

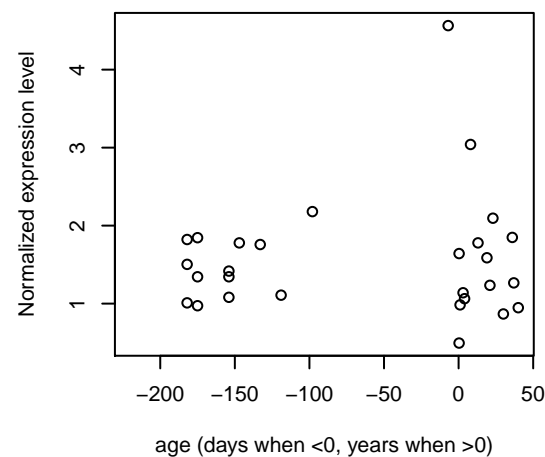

**CTH (P=0.726, Diff = 0.02)**  
**prefrontal cortex**

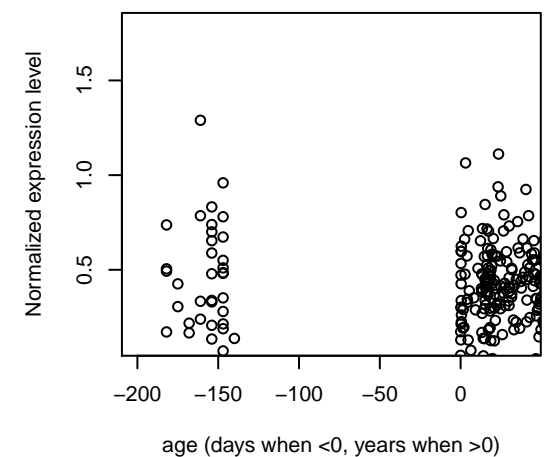



**RBFOX1 (P=0.3705, Diff = -2.74)**  
**amygdaloid complex**

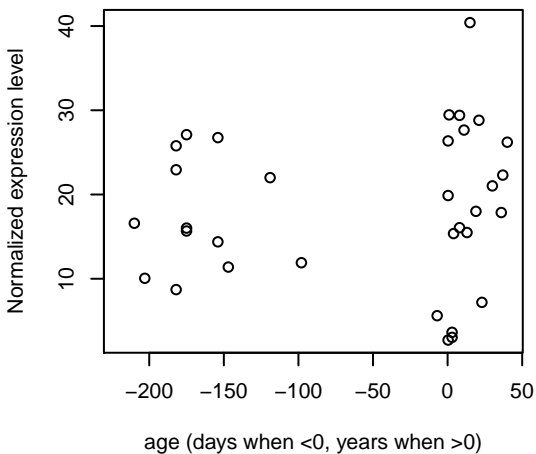

**RBFOX1 (P=0.7222, Diff = 1.38)**  
**anterior cingulate cortex**

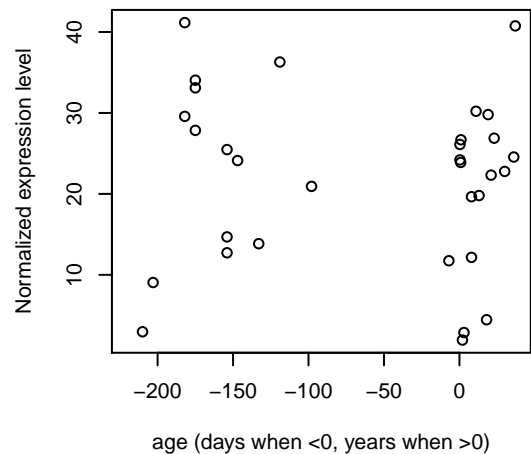

**RBFOX1 (P=0, Diff = -10.95)**  
**cerebellar cortex**

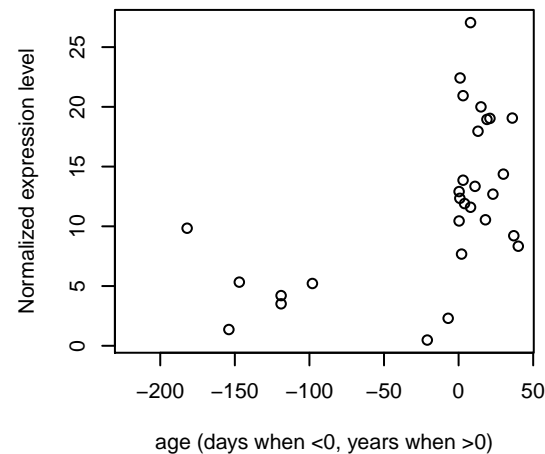

**RBFOX1 (P=0.465, Diff = 3.62)**  
**dorsolateral prefrontal cortex**

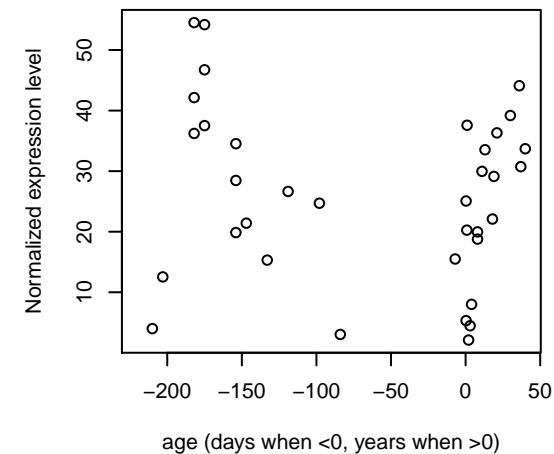

**RBFOX1 (P=0.0029, Diff = -9.69)**  
**hippocampus**

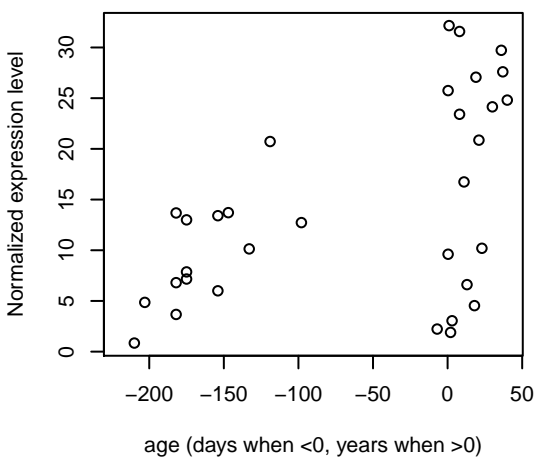

**RBFOX1 (P=0.7702, Diff = 1.09)**  
**inferolateral temporal cortex**

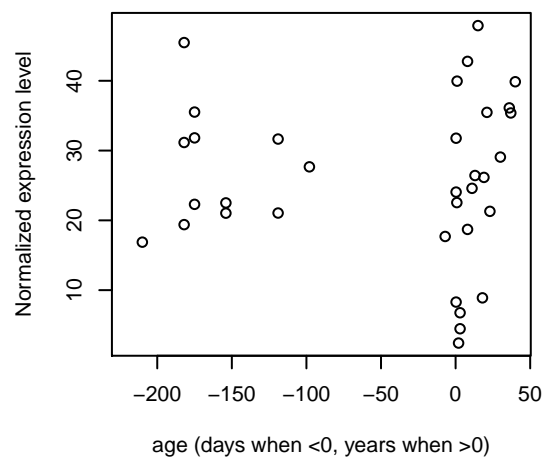

**RBFOX1 (P=0.6994, Diff = -1.33)**  
**mediodorsal nucleus of thalamus**

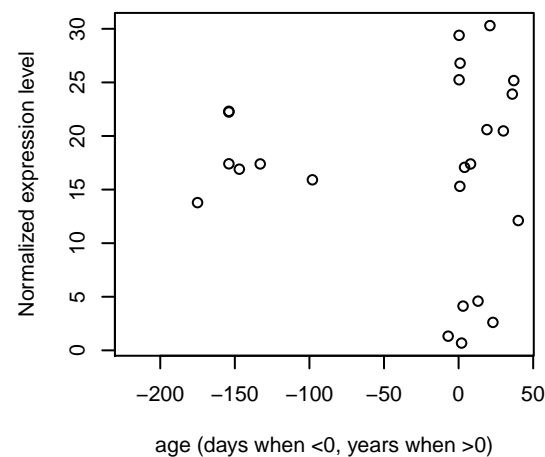

**RBFOX1 (P=0.7107, Diff = 1.75)**  
**orbital frontal cortex**

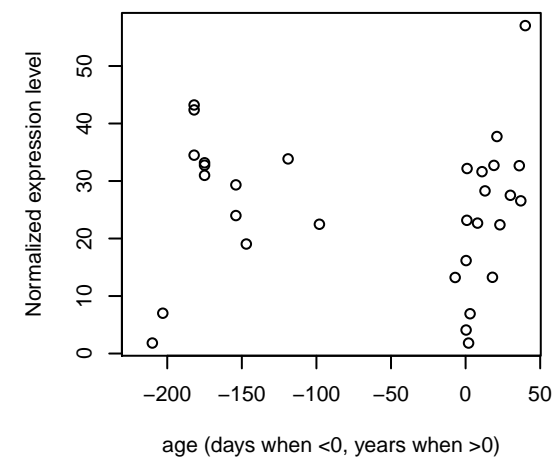

**RBFOX1 (P=0.6075, Diff = -2.35)**  
**posterior superior temporal cortex**

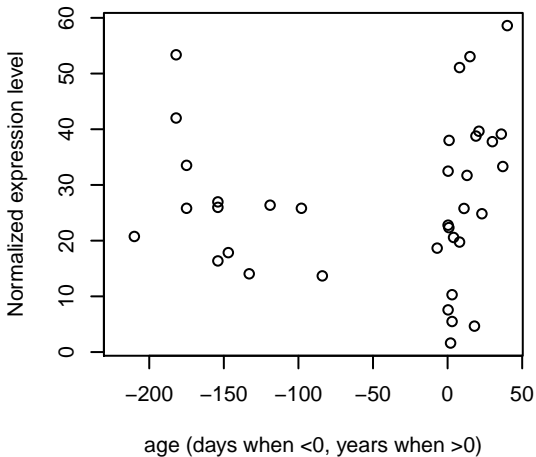

**RBFOX1 (P=0.2761, Diff = 5.96)**  
**posteroventral parietal cortex**

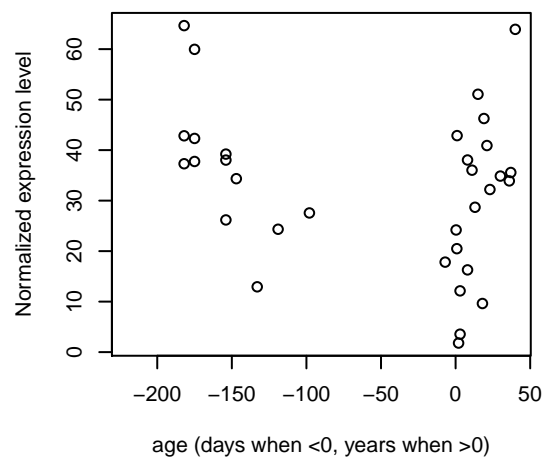

**RBFOX1 (P=0.798, Diff = -1.39)**  
**primary auditory cortex**

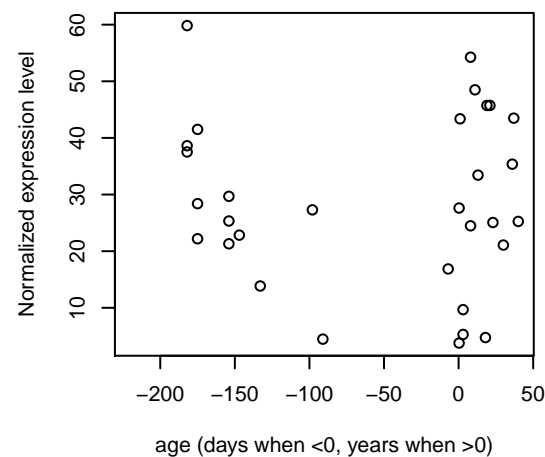

**RBFOX1 (P=0.0143, Diff = 16.33)**  
**primary motor cortex**

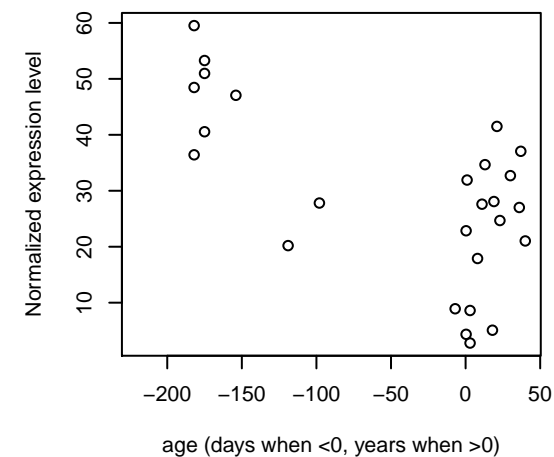

**RBFOX1 (P=0.0252, Diff = 12.49)**  
**primary somatosensory cortex**

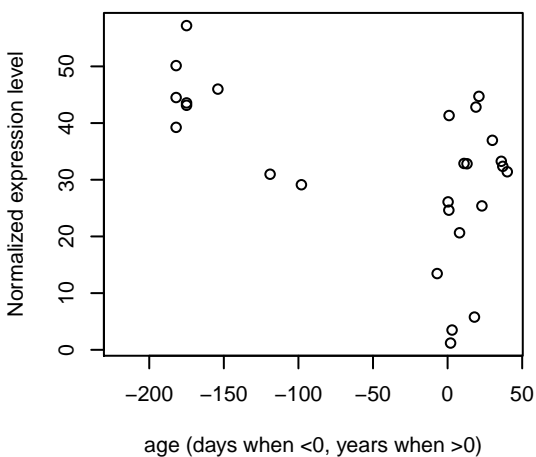

**RBFOX1 (P=0.2228, Diff = -6.26)**  
**primary visual cortex**

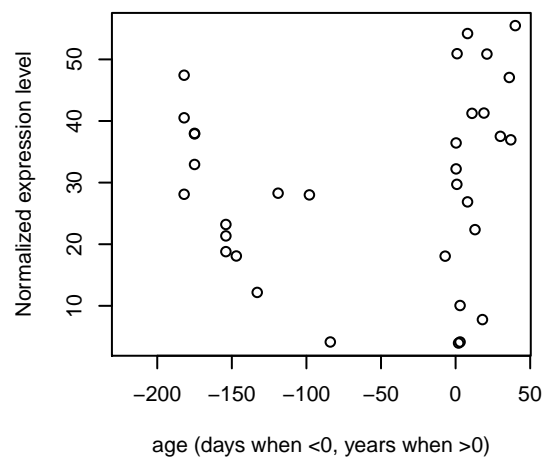

**RBFOX1 (P=0.4994, Diff = -2.9)**  
**striatum**

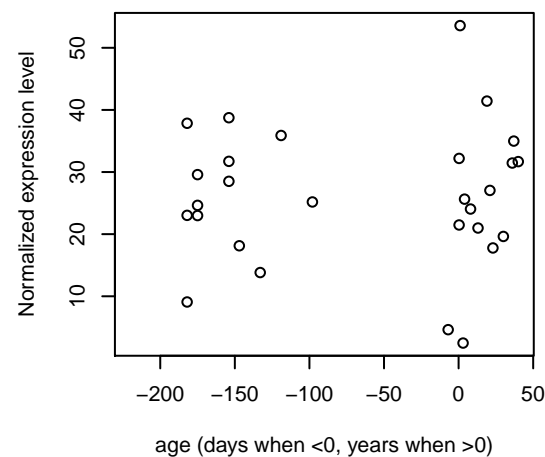

**RBFOX1 (P=1e-04, Diff = -0.12)**  
**prefrontal cortex**

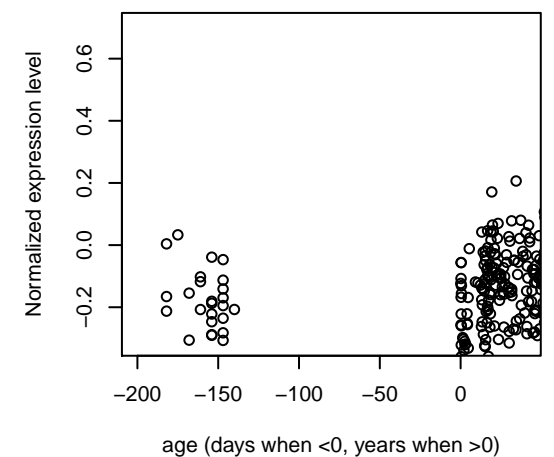

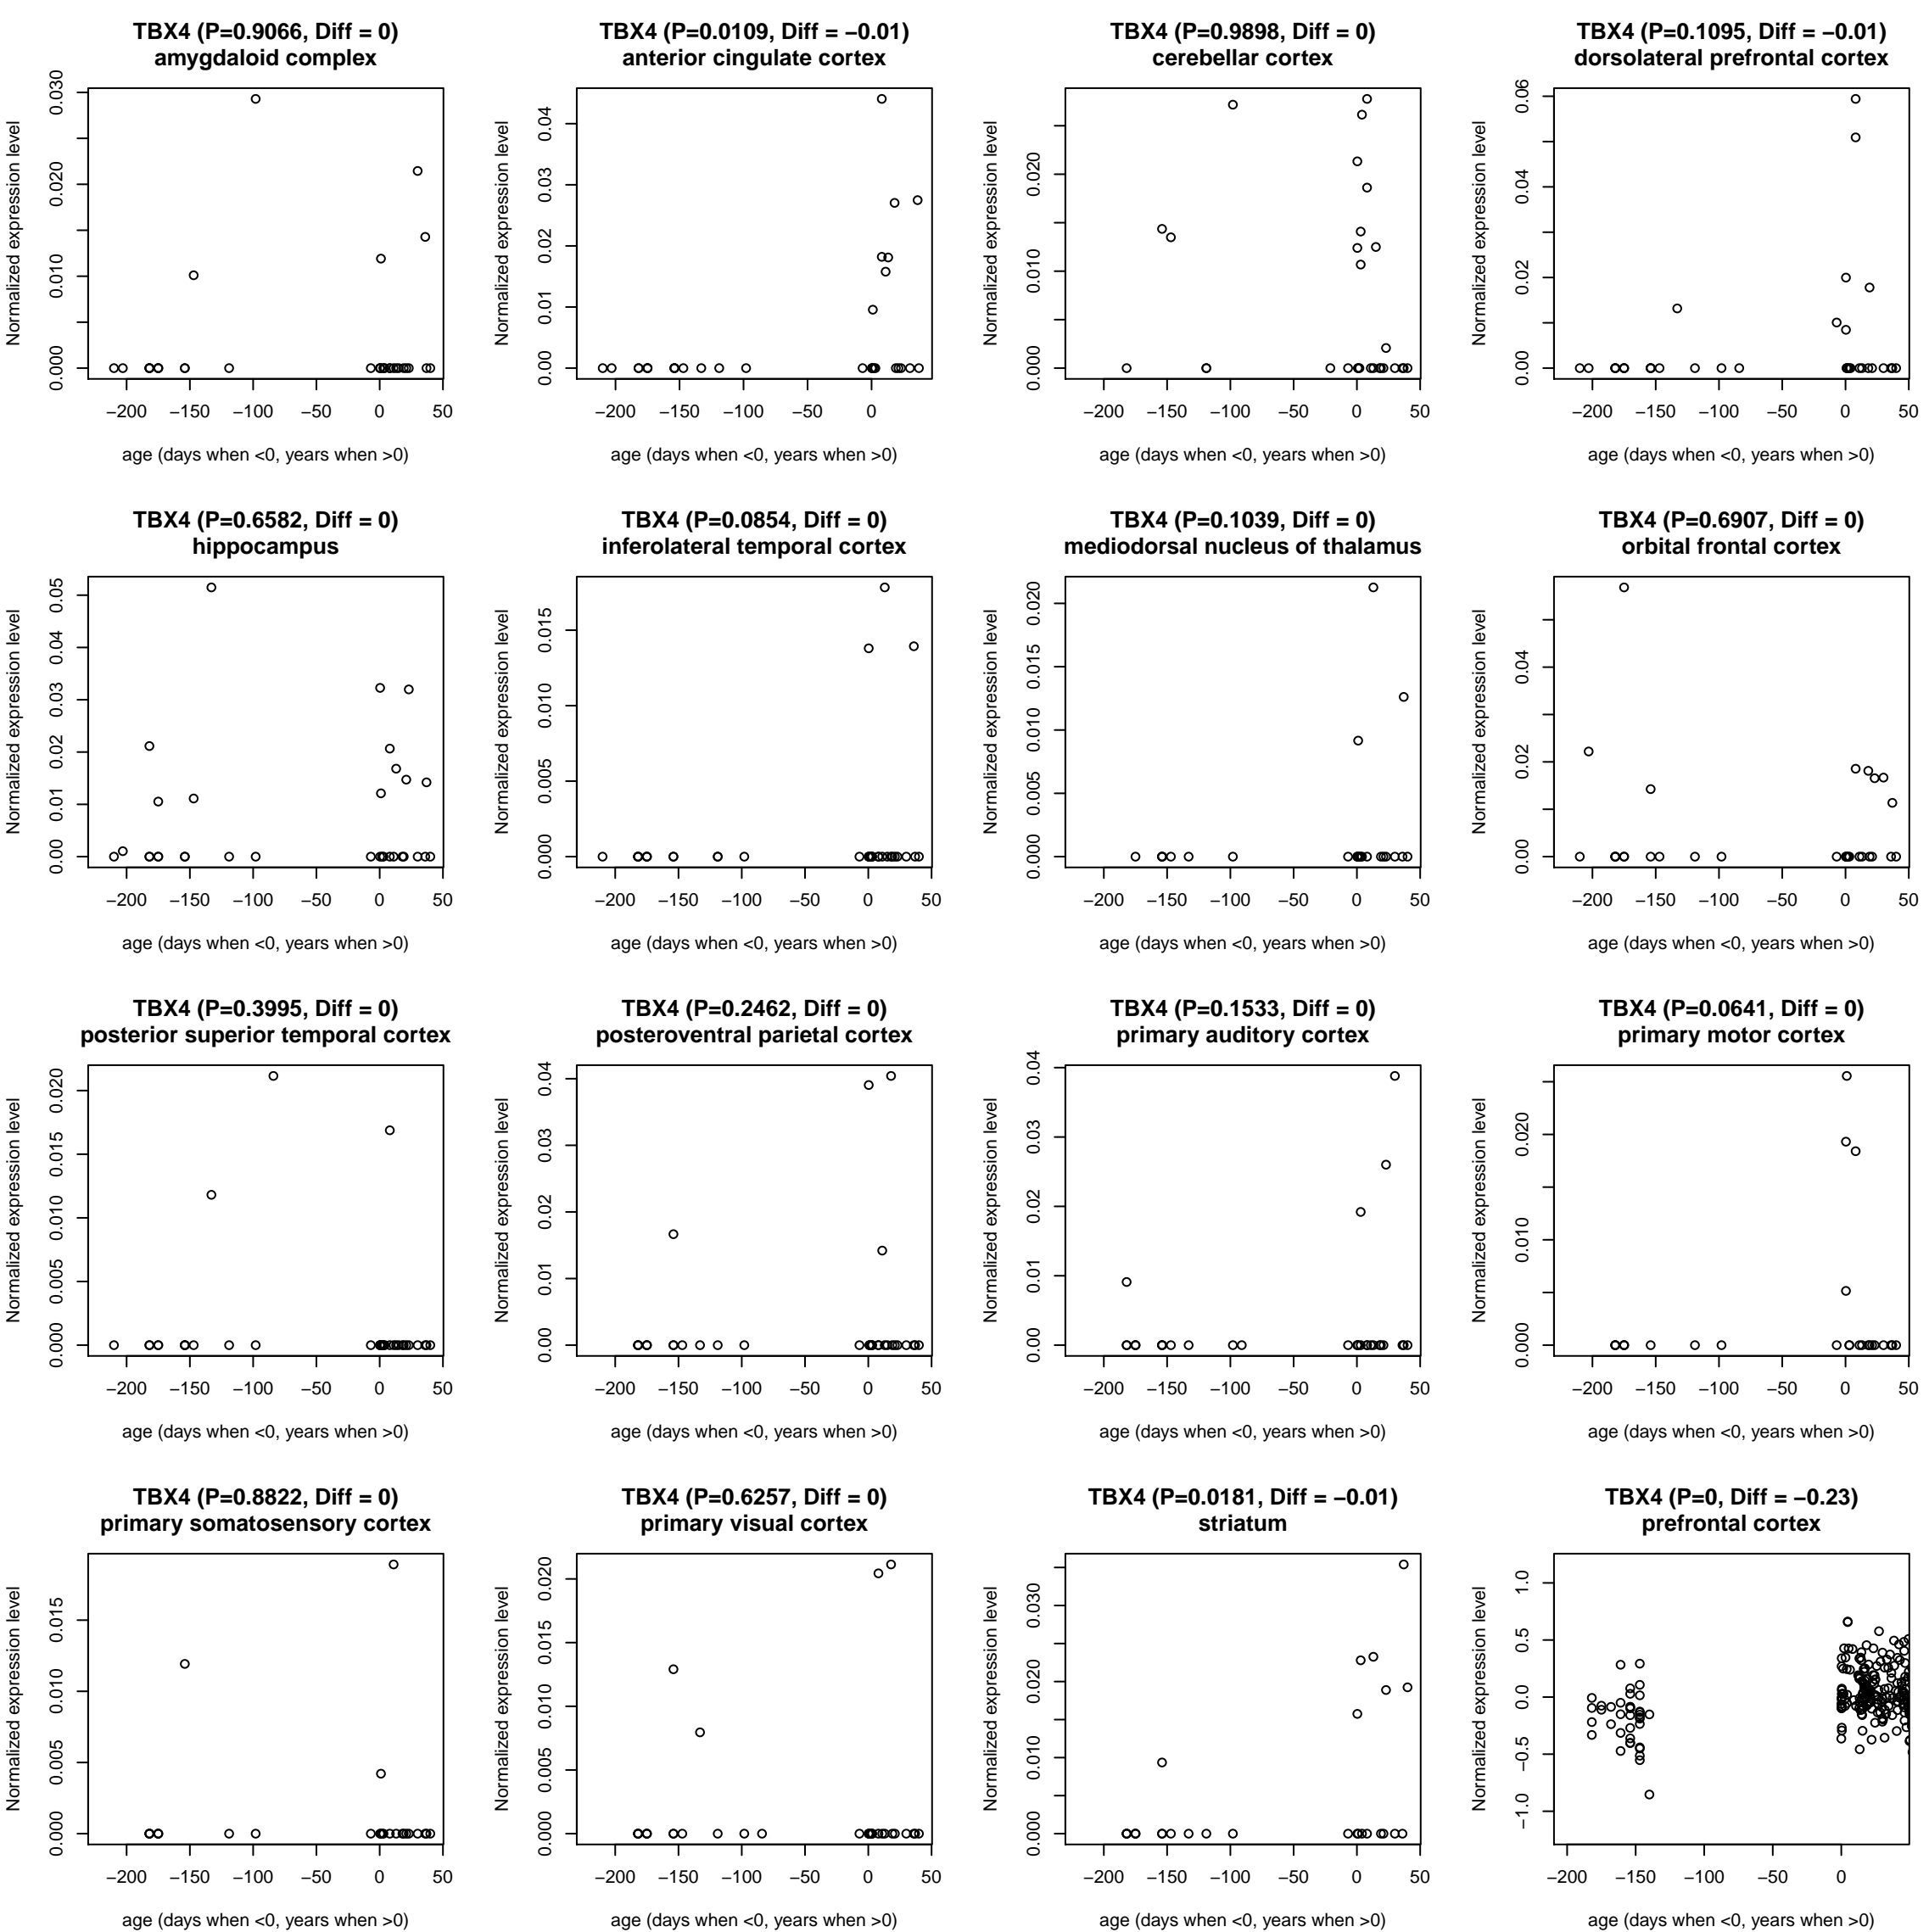

**FRG1 (P=0, Diff = 7.66)**  
**amygdaloid complex**

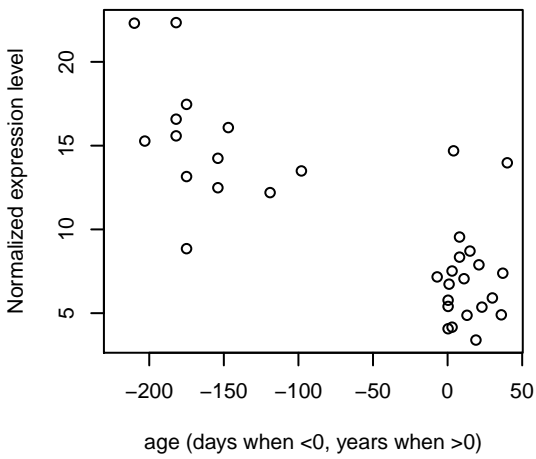

**FRG1 (P=2e-04, Diff = 7.13)**  
**anterior cingulate cortex**

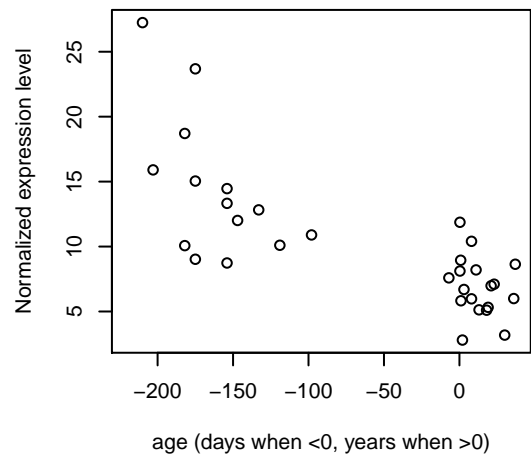

**FRG1 (P=0.378, Diff = 1.74)**  
**cerebellar cortex**

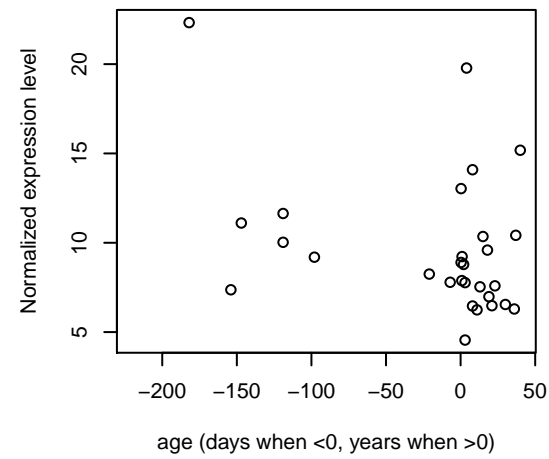

**FRG1 (P=2e-04, Diff = 7.24)**  
**dorsolateral prefrontal cortex**

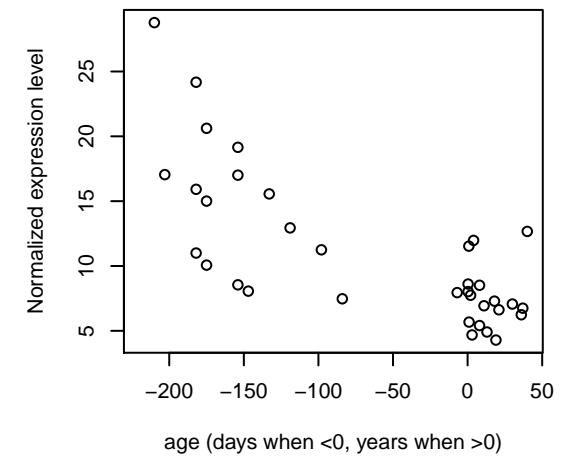

**FRG1 (P=6e-04, Diff = 6.16)**  
**hippocampus**

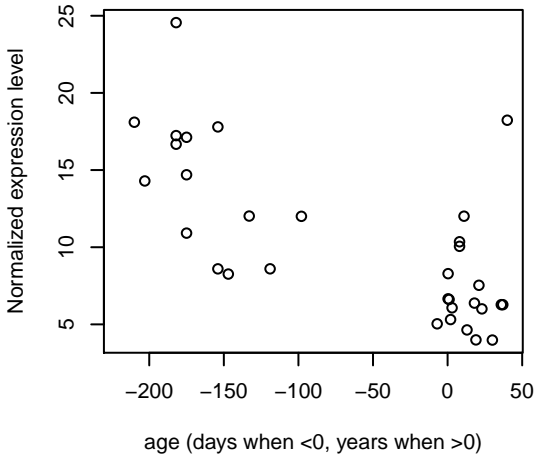

**FRG1 (P=0.0072, Diff = 4.78)**  
**inferolateral temporal cortex**

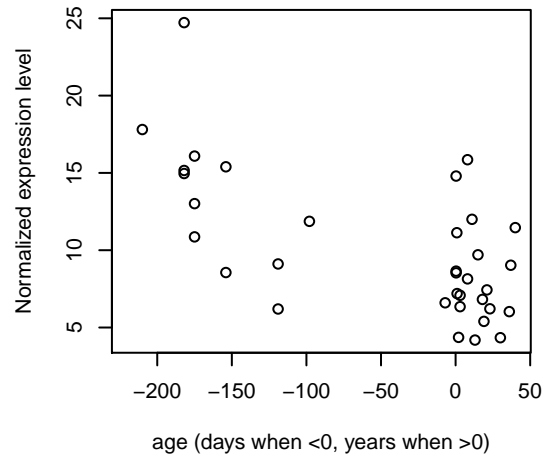

**FRG1 (P=0.0245, Diff = 2.36)**  
**mediodorsal nucleus of thalamus**

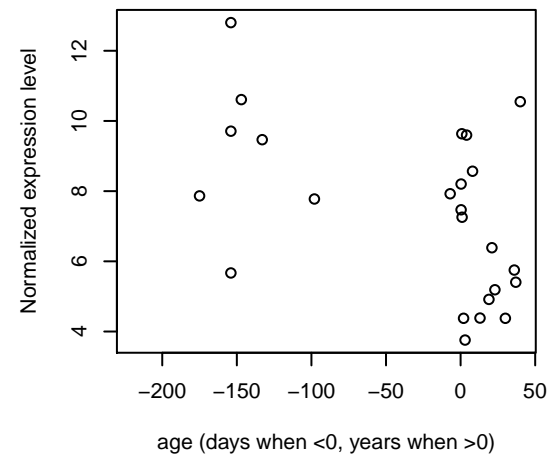

**FRG1 (P=1e-04, Diff = 7.34)**  
**orbital frontal cortex**

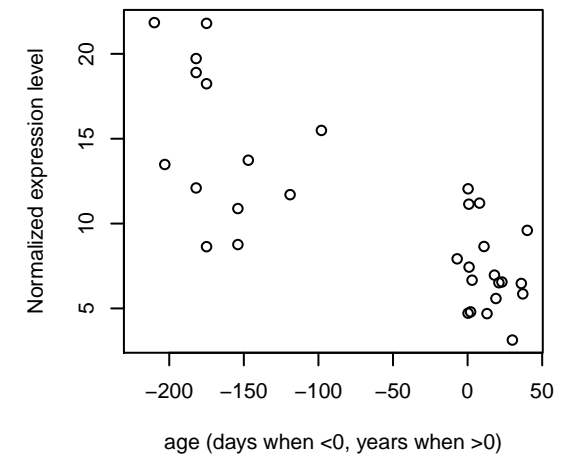

**FRG1 (P=9e-04, Diff = 5.2)**  
**posterior superior temporal cortex**

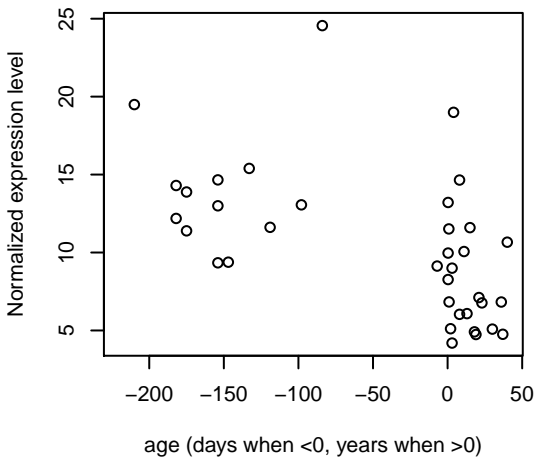

**FRG1 (P=1e-04, Diff = 6.92)**  
**posteroventral parietal cortex**

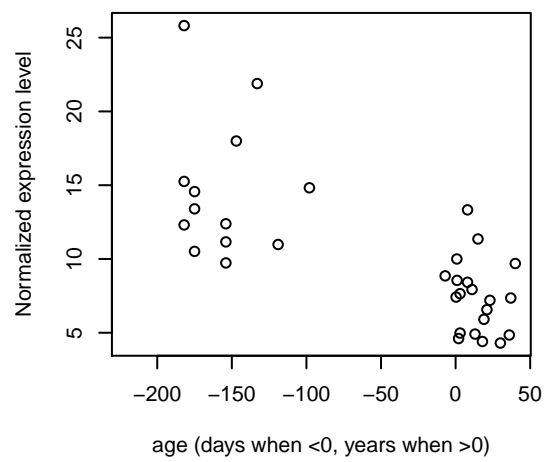

**FRG1 (P=5e-04, Diff = 5.89)**  
**primary auditory cortex**

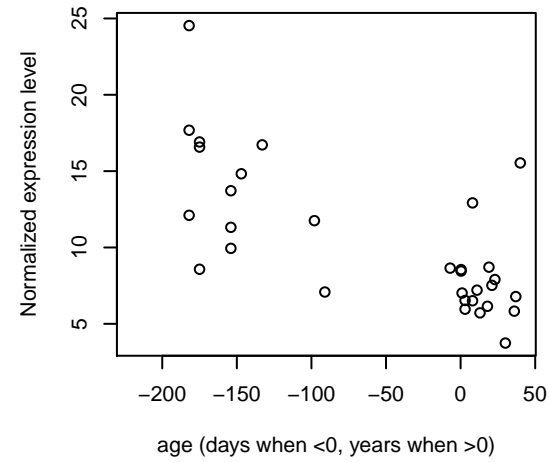

**FRG1 (P=0.0115, Diff = 4.92)**  
**primary motor cortex**

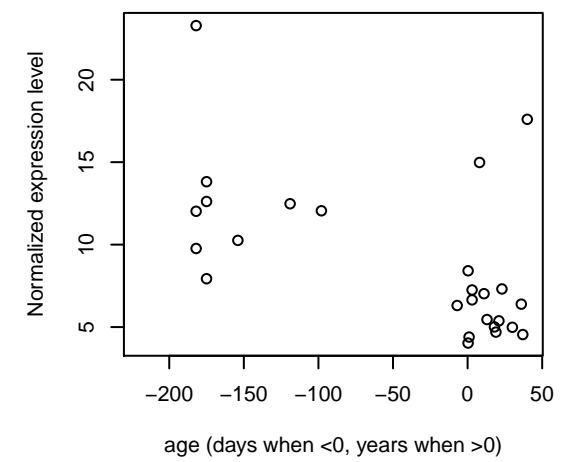

**FRG1 (P=0.0043, Diff = 4.94)**  
**primary somatosensory cortex**

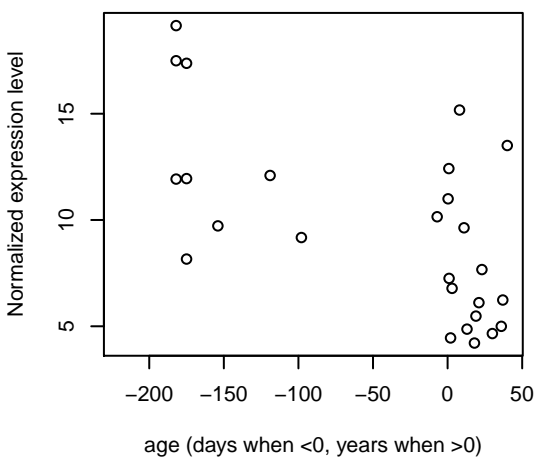

**FRG1 (P=6e-04, Diff = 5.54)**  
**primary visual cortex**

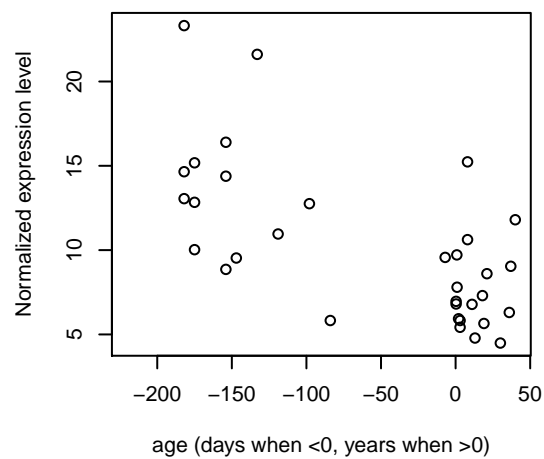

**FRG1 (P=0.0013, Diff = 4.97)**  
**striatum**

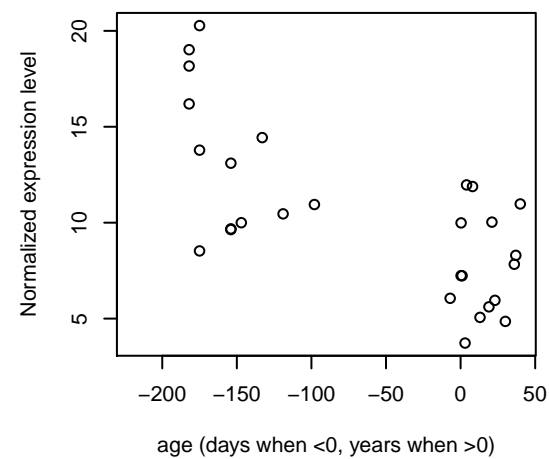

**FRG1 (P=0.0082, Diff = 0.16)**  
**prefrontal cortex**

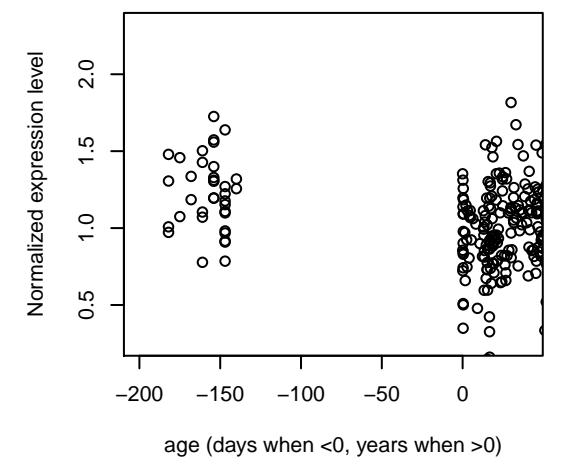

**METTL4 (P=0, Diff = 1.29)**  
**amygdaloid complex**

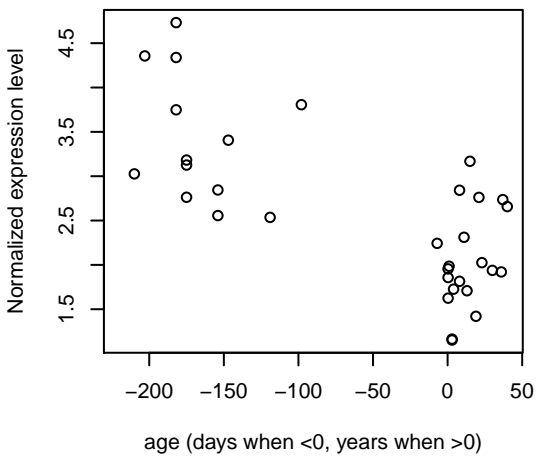

**METTL4 (P=0.008, Diff = 0.84)**  
**anterior cingulate cortex**

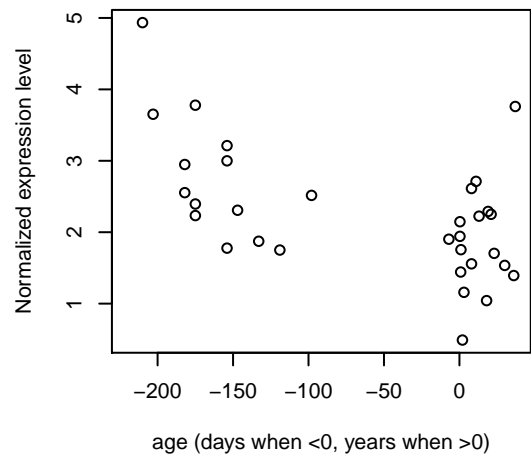

**METTL4 (P=0.1701, Diff = 0.26)**  
**cerebellar cortex**

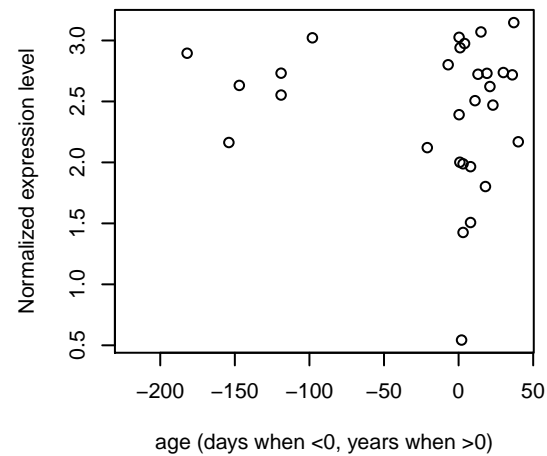

**METTL4 (P=0.1493, Diff = 0.42)**  
**dorsolateral prefrontal cortex**

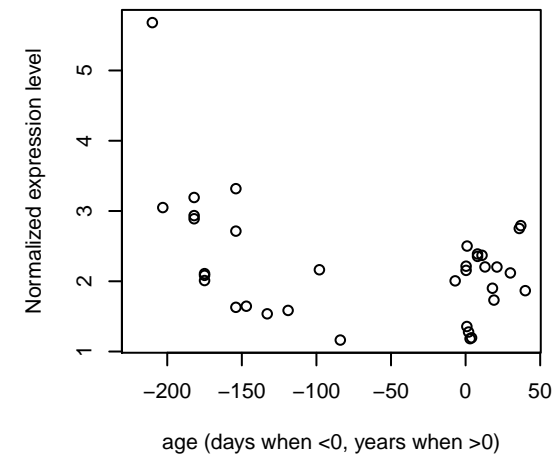

**METTL4 (P=0.0048, Diff = 0.94)**  
**hippocampus**

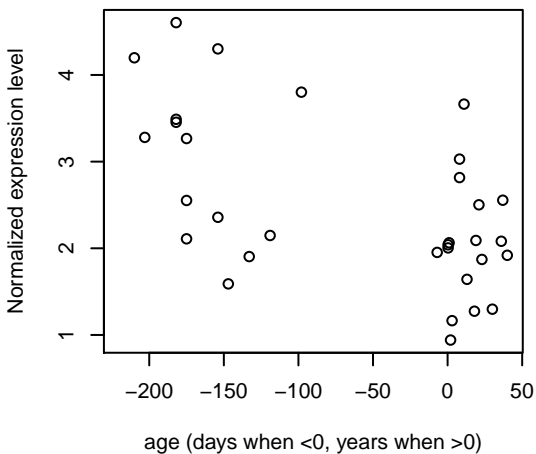

**METTL4 (P=0.564, Diff = 0.18)**  
**inferolateral temporal cortex**

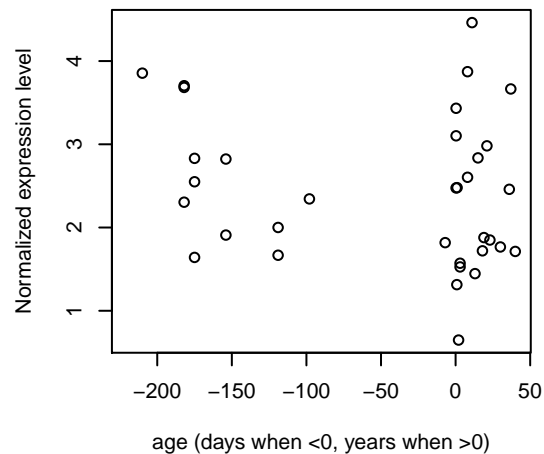

**METTL4 (P=0.0252, Diff = 0.68)**  
**mediodorsal nucleus of thalamus**

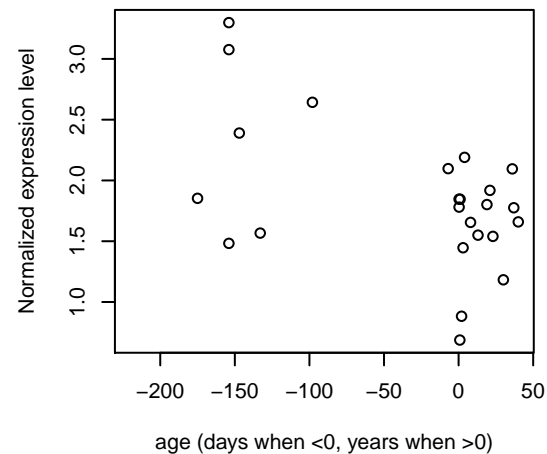

**METTL4 (P=0.008, Diff = 0.88)**  
**orbital frontal cortex**

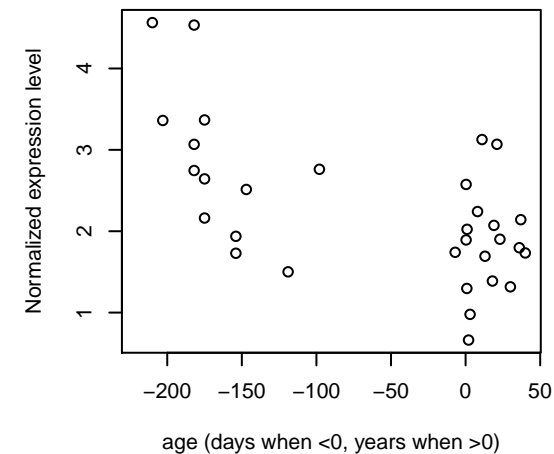

**METTL4 (P=0.7486, Diff = 0.08)**  
**posterior superior temporal cortex**

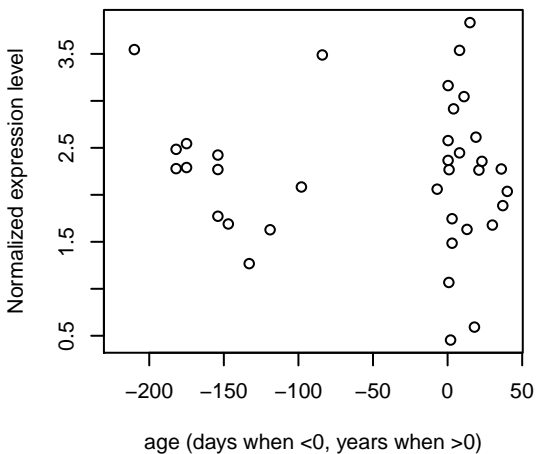

**METTL4 (P=0.7766, Diff = -0.07)**  
**posteroventral parietal cortex**

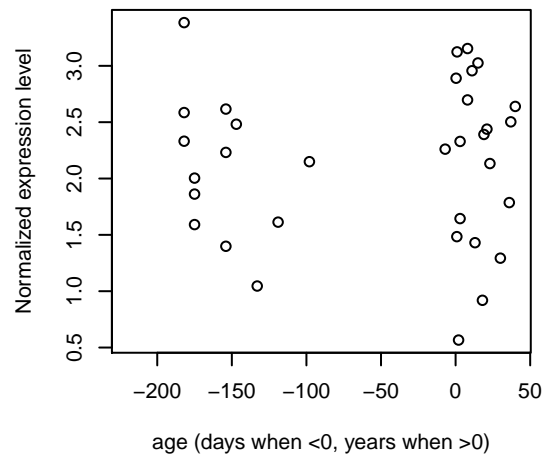

**METTL4 (P=0.9662, Diff = -0.01)**  
**primary auditory cortex**

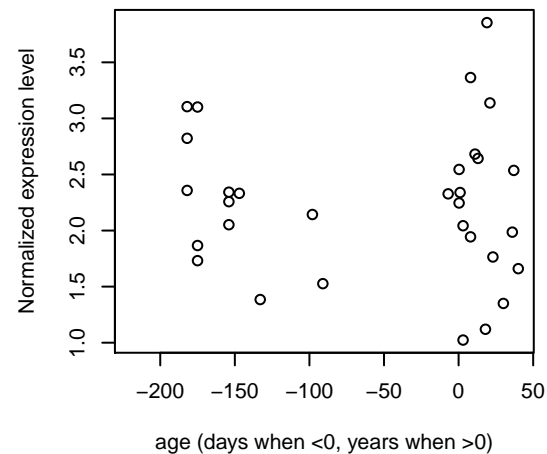

**METTL4 (P=0.1172, Diff = 0.29)**  
**primary motor cortex**

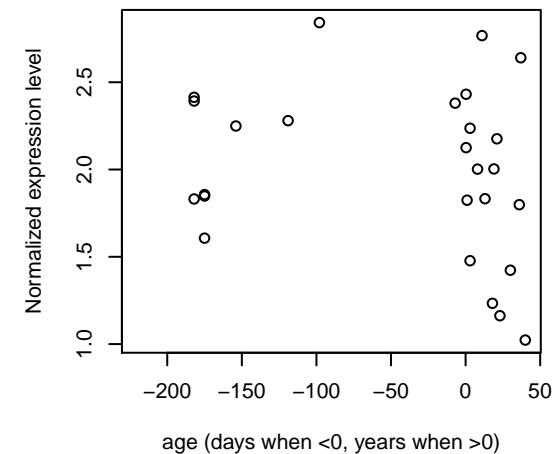

**METTL4 (P=0.6668, Diff = 0.09)**  
**primary somatosensory cortex**

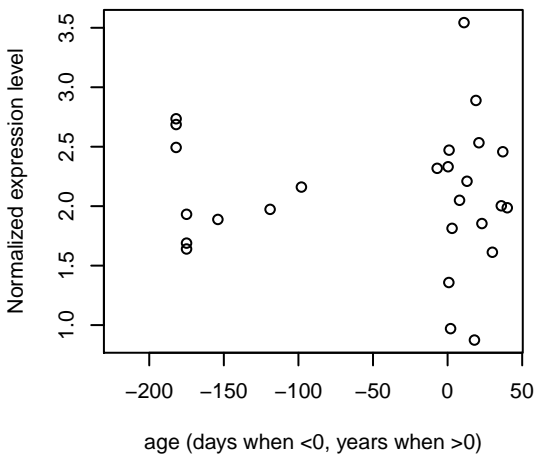

**METTL4 (P=0.7631, Diff = 0.08)**  
**primary visual cortex**

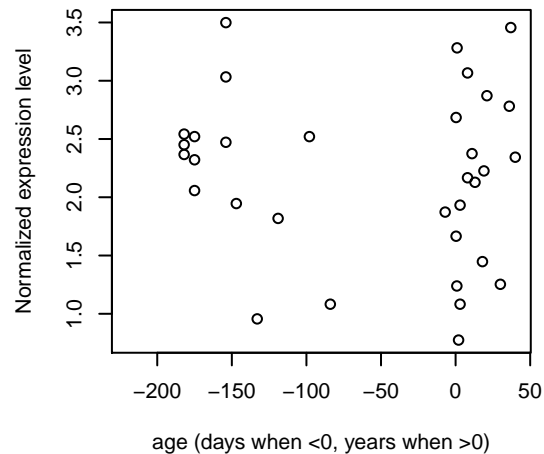

**METTL4 (P=0.6113, Diff = -0.17)**  
**striatum**

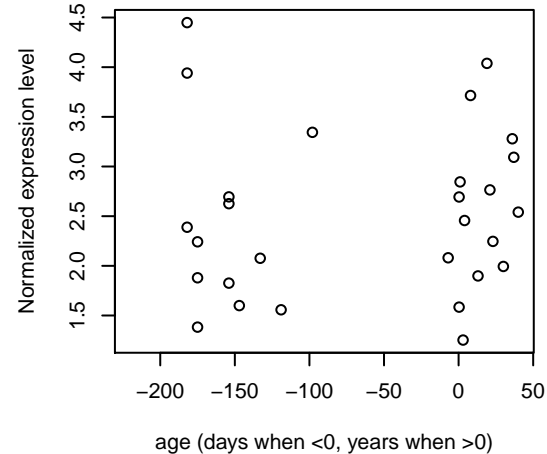

**C7orf11 (P=0, Diff = 9.73)  
amygdaloid complex**

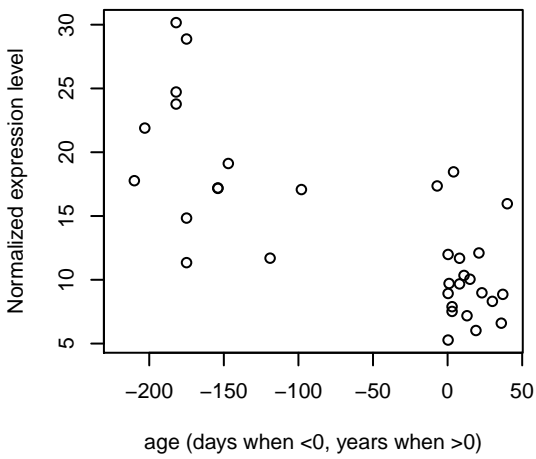

**C7orf11 (P=0.0013, Diff = 8.9)  
anterior cingulate cortex**

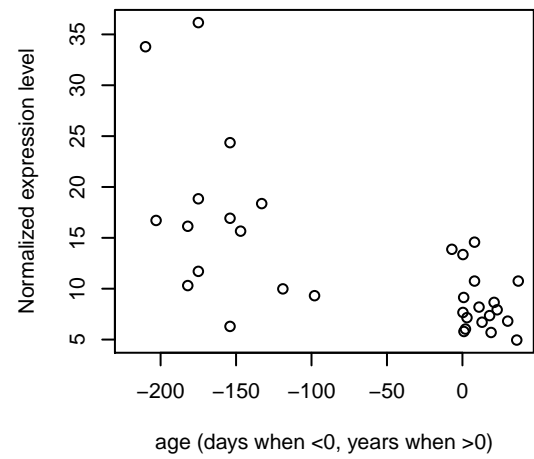

**C7orf11 (P=0.01, Diff = 6.92)  
cerebellar cortex**

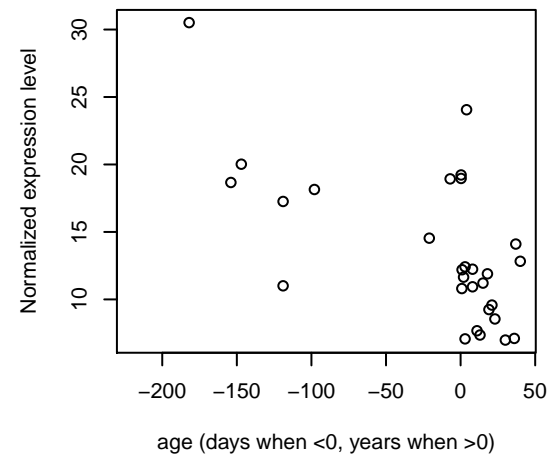

**C7orf11 (P=2e-04, Diff = 8)  
dorsolateral prefrontal cortex**

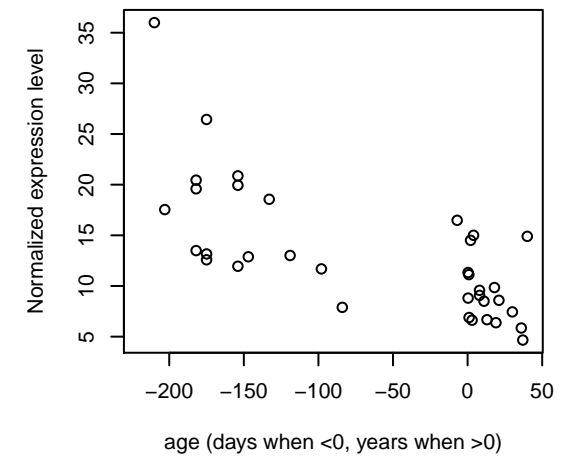

**C7orf11 (P=1e-04, Diff = 8.85)  
hippocampus**

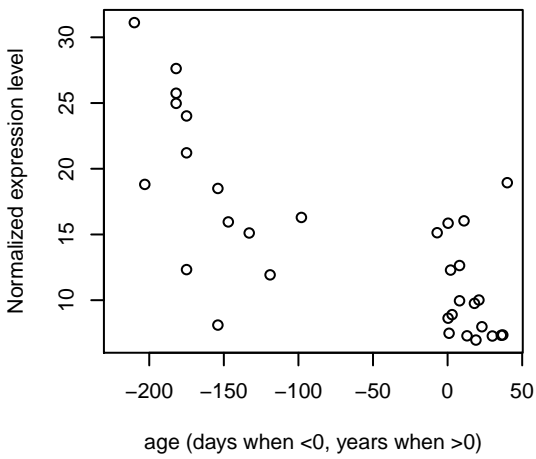

**C7orf11 (P=0.0072, Diff = 5.97)  
inferolateral temporal cortex**

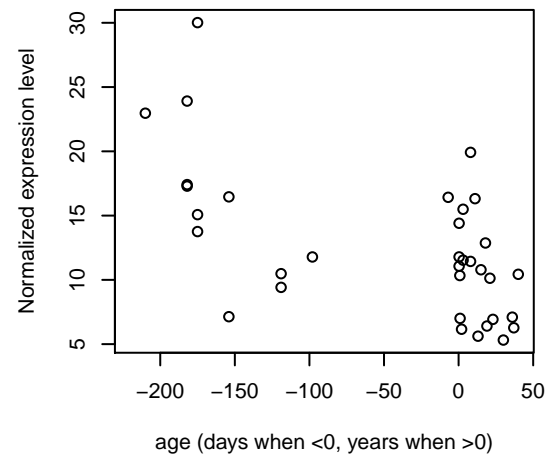

**C7orf11 (P=1e-04, Diff = 7.17)  
mediodorsal nucleus of thalamus**

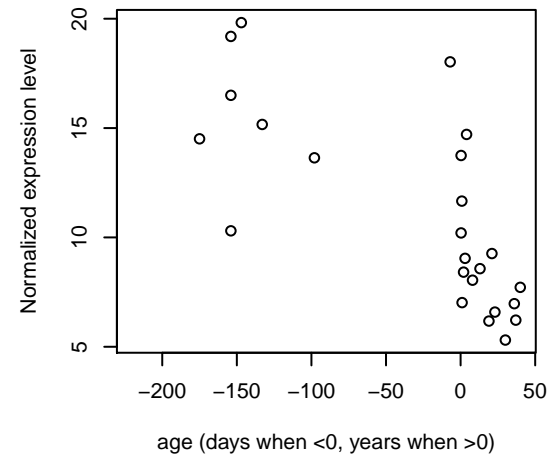

**C7orf11 (P=0.0015, Diff = 8.64)  
orbital frontal cortex**

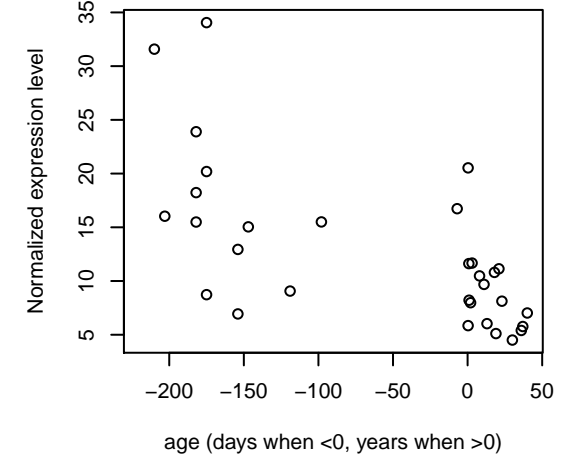

**C7orf11 (P=0.0013, Diff = 6.48)  
posterior superior temporal cortex**

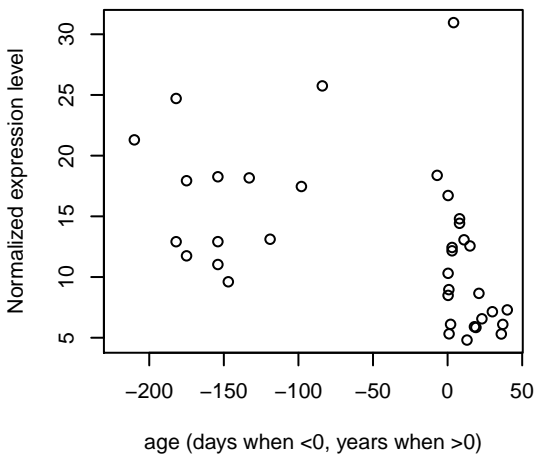

**C7orf11 (P=0.0022, Diff = 5.51)  
posteroventral parietal cortex**

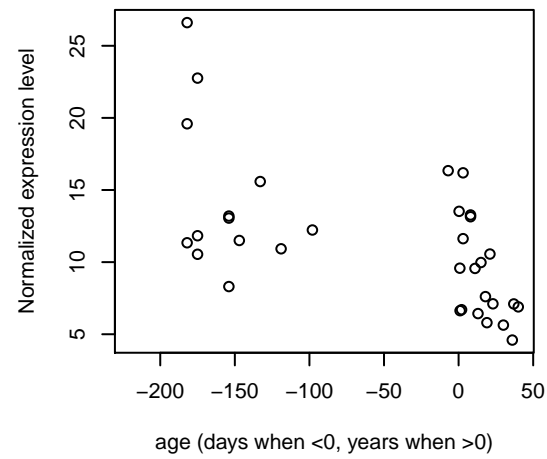

**C7orf11 (P=0.0024, Diff = 5.21)  
primary auditory cortex**

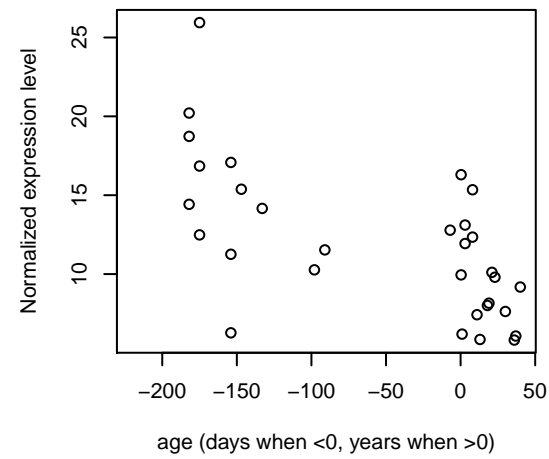

**C7orf11 (P=0.0022, Diff = 5.61)  
primary motor cortex**

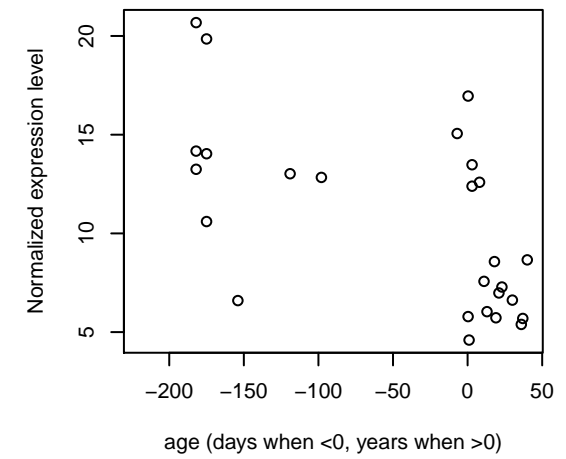

**C7orf11 (P=0.0154, Diff = 6.37)  
primary somatosensory cortex**

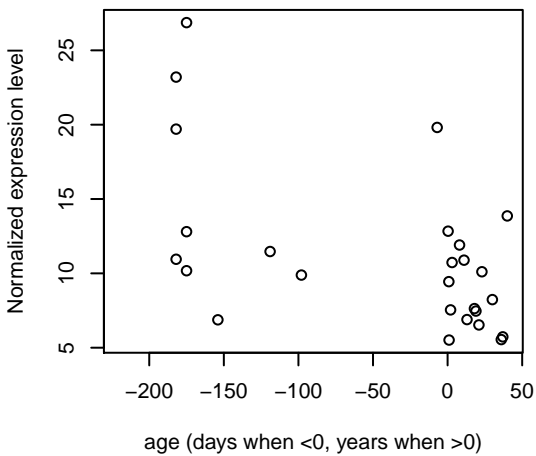

**C7orf11 (P=9e-04, Diff = 5.58)  
primary visual cortex**

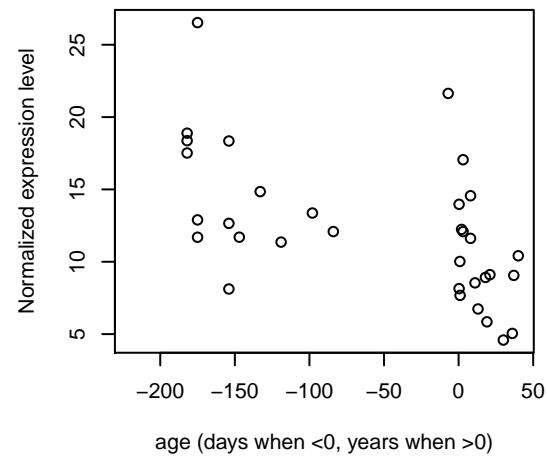

**C7orf11 (P=9e-04, Diff = 8.96)  
striatum**

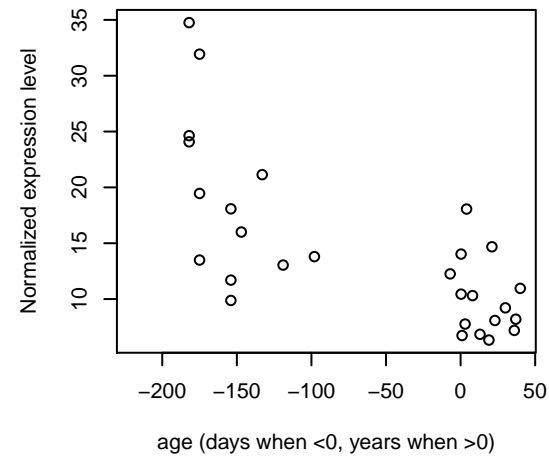

**C7orf11 (P=0, Diff = 0.91)  
prefrontal cortex**

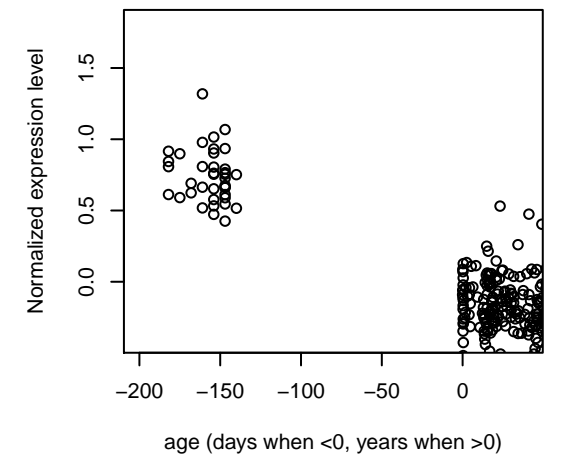

Supplement: tp2017159x3.pdf [file tp2017159x3.pdf]
