# Supplementary material for: Genome-wide association analysis identifies common variants influencing infant brain volumes
Source: PubMed Central journal article supplement — Transl Psychiatry. 2017 Aug 1;7(8):e1188–. doi: 10.1038/tp.2017.159 (PMC5611727; doi:10.1038/tp.2017.159), 2017-08-01

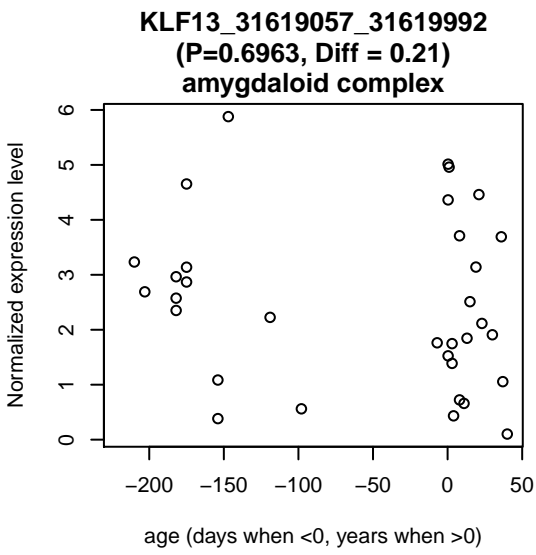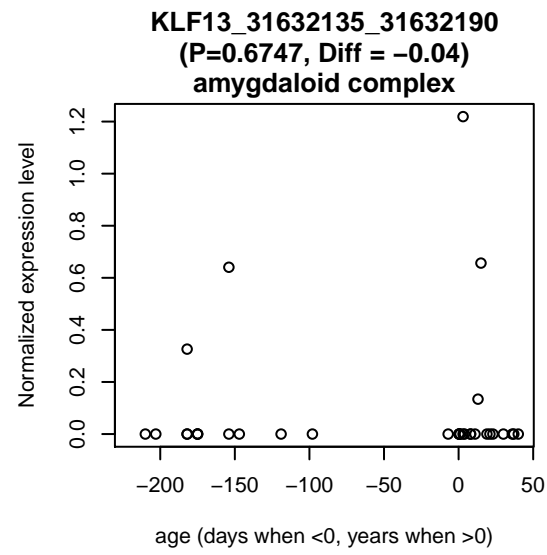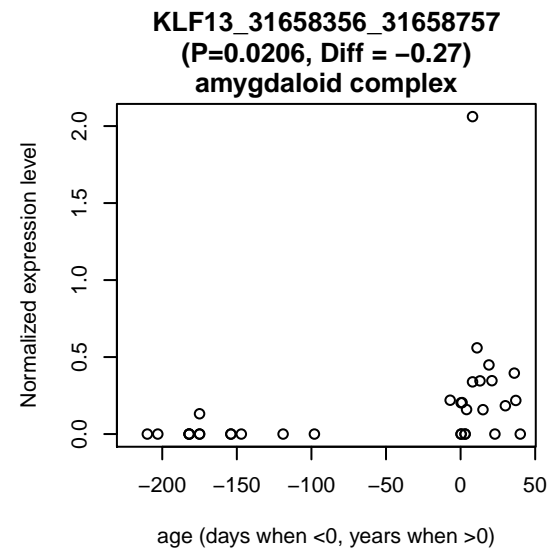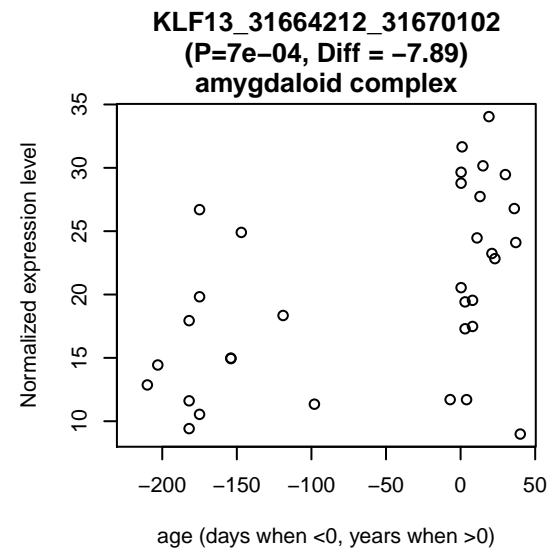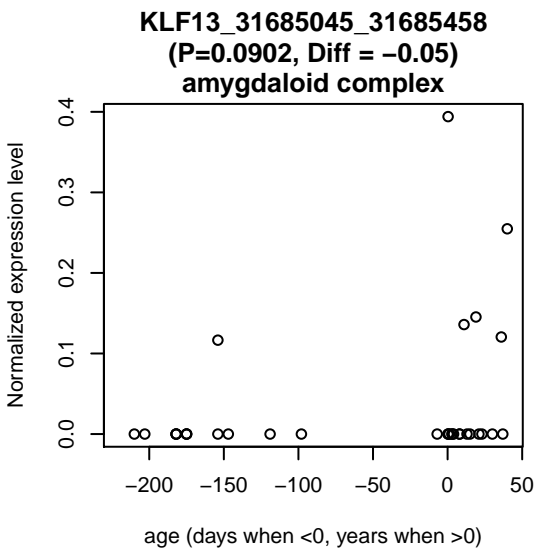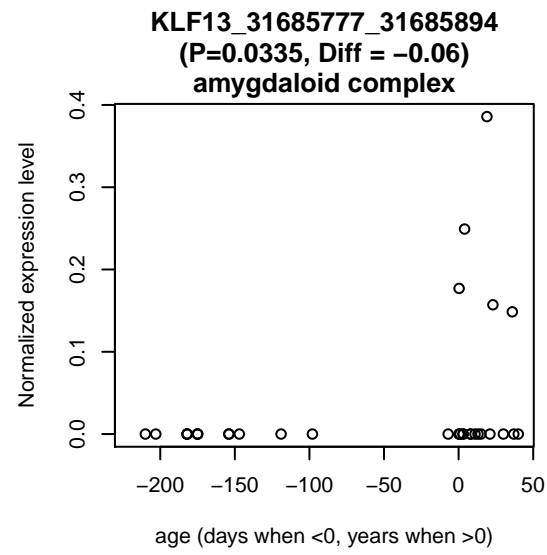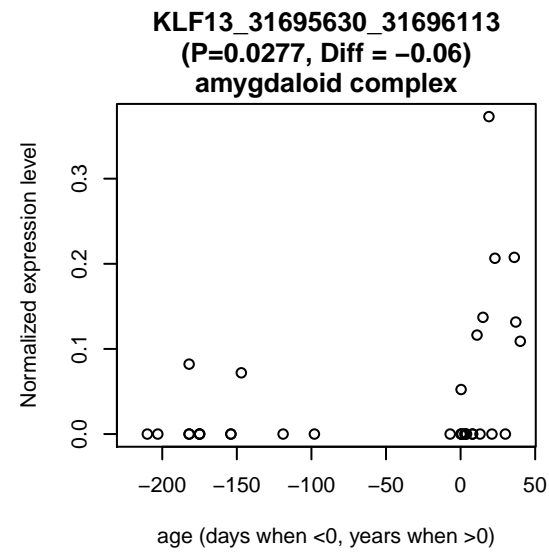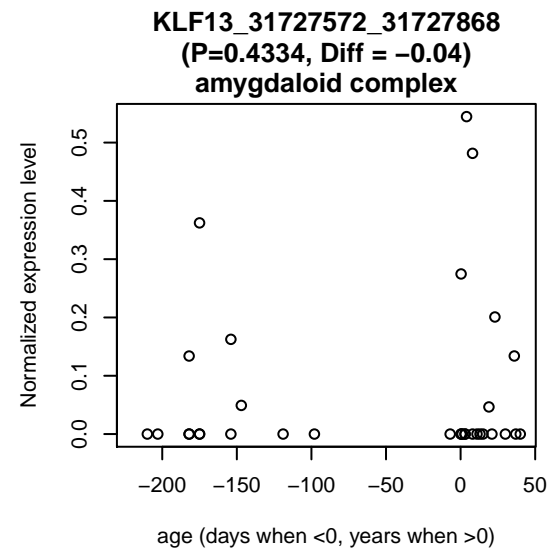

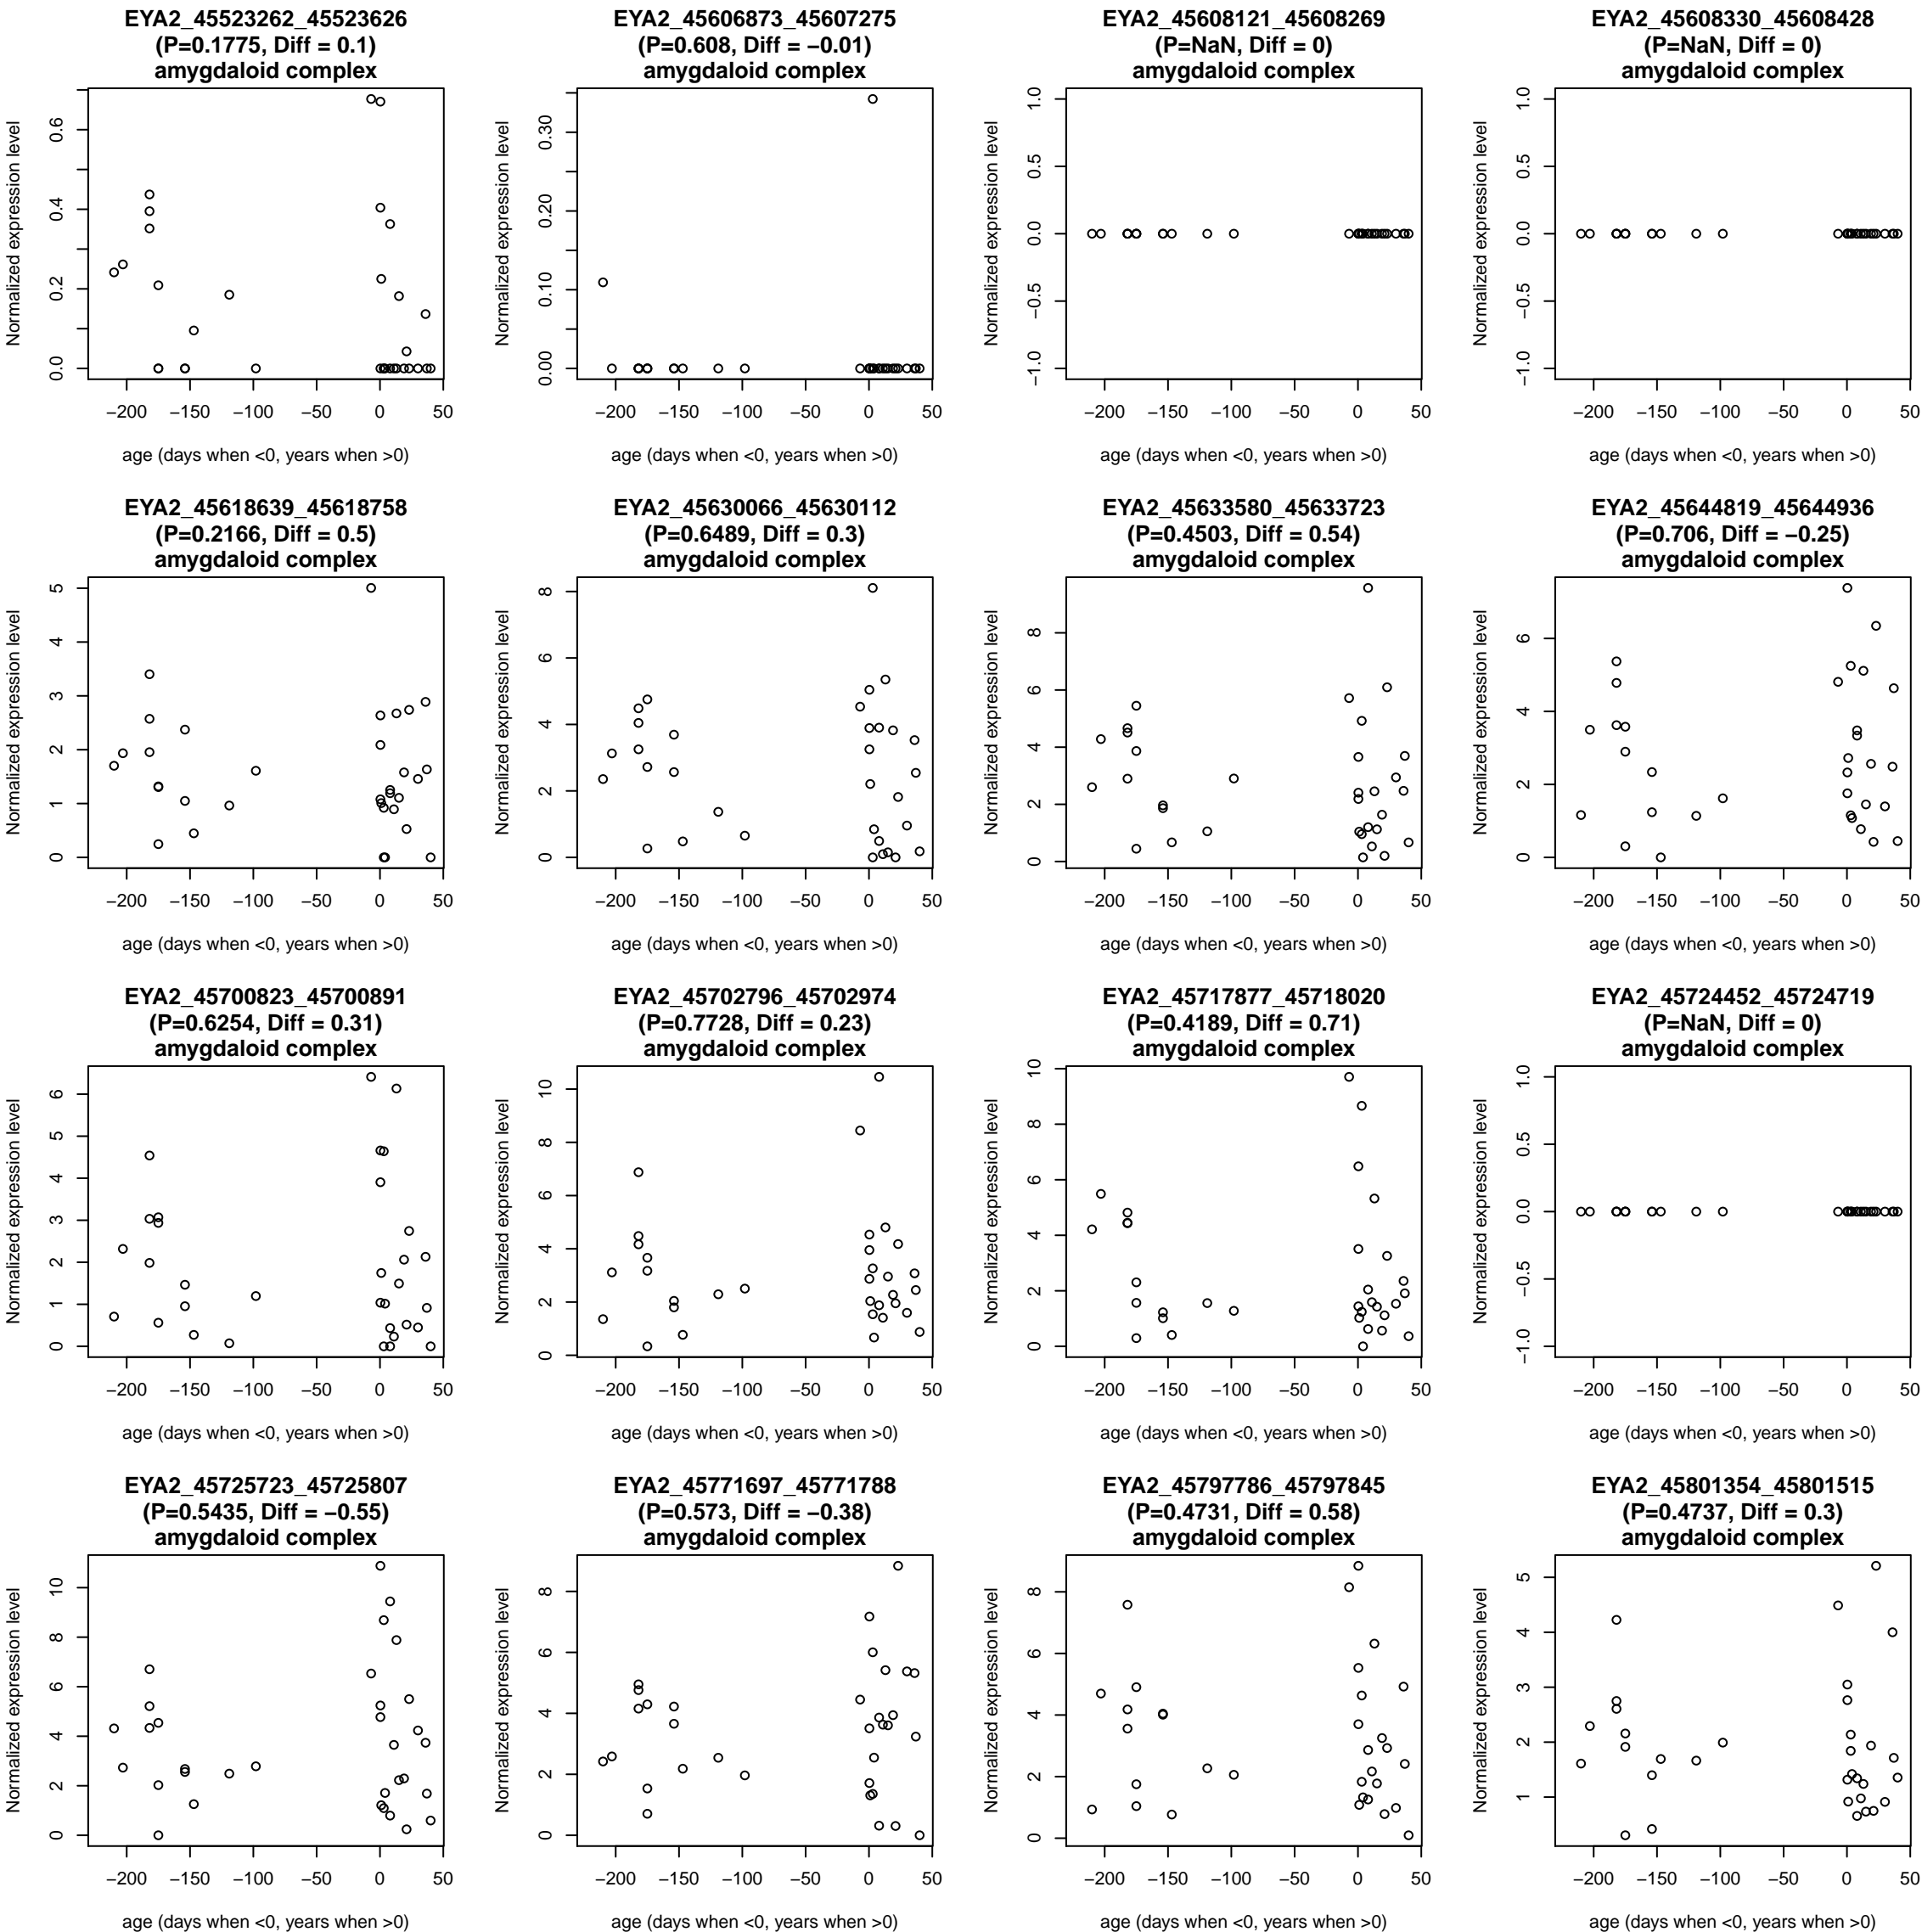

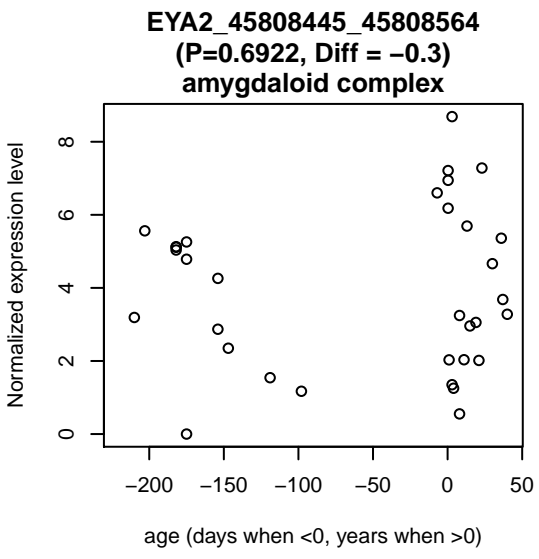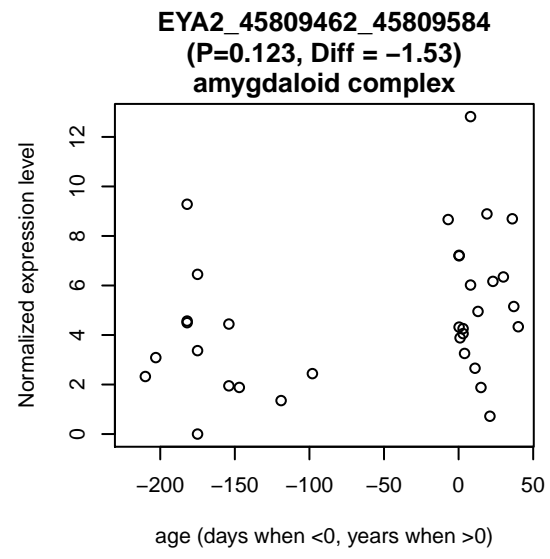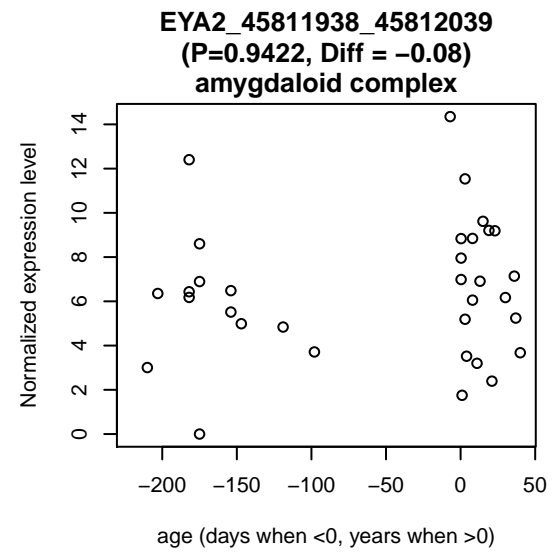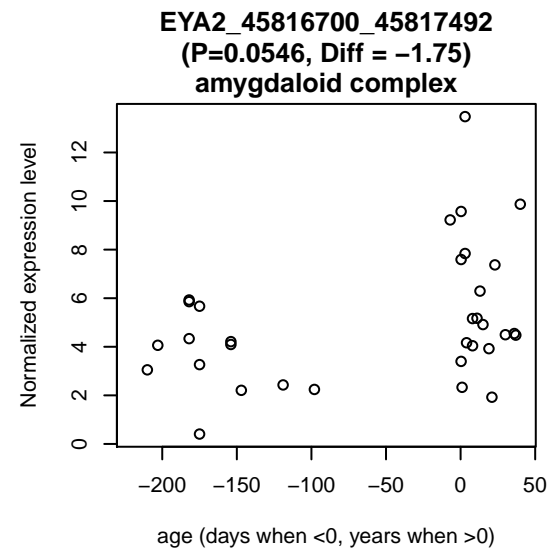

**LMCD1\_8543392\_8543666**  
(P=0.8141, Diff = -0.07)  
amygdaloid complex

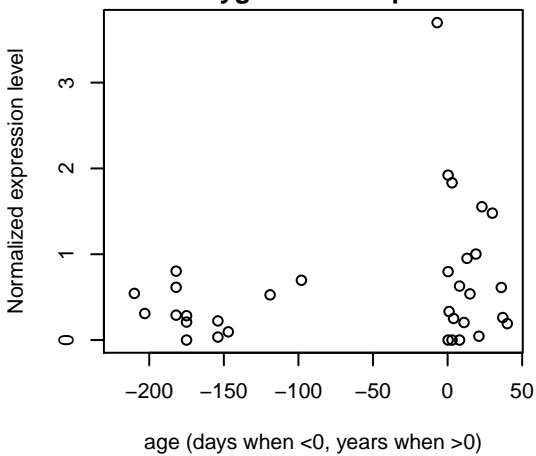

**LMCD1\_8556610\_8556681**  
(P=0.1536, Diff = -0.12)  
amygdaloid complex

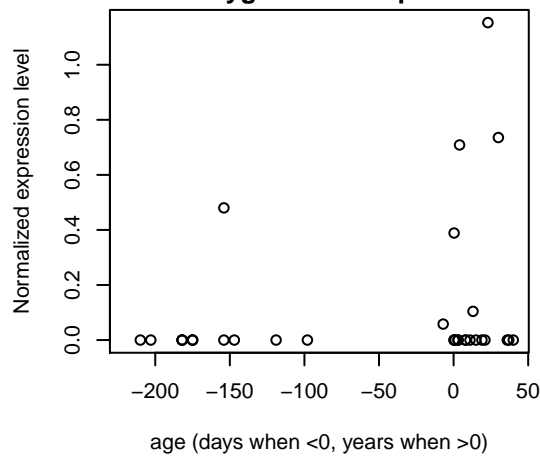

**LMCD1\_8574422\_8574511**  
(P=0.104, Diff = -1.89)  
amygdaloid complex

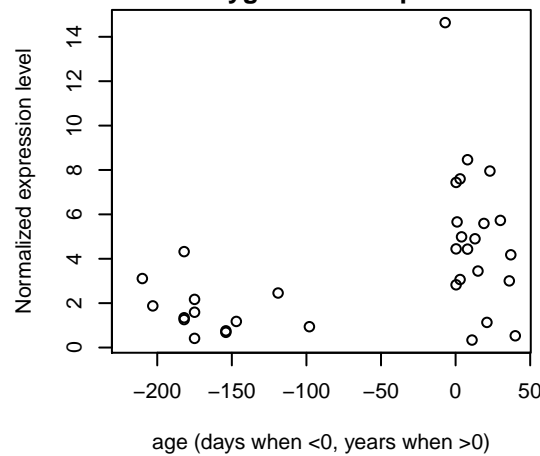

**LMCD1\_8578868\_8579204**  
(P=0.2947, Diff = -0.85)  
amygdaloid complex

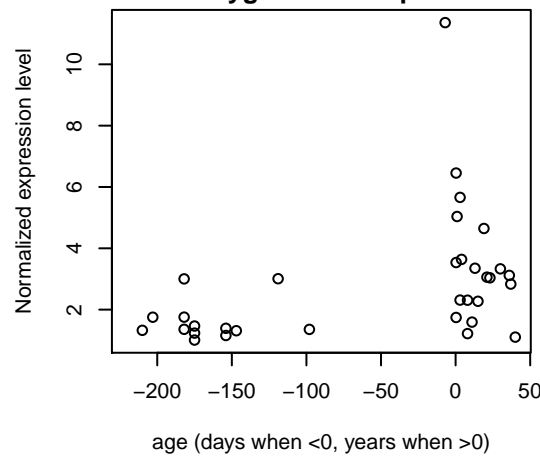

**LMCD1\_8590253\_8590589**  
(P=0.1844, Diff = -1.01)  
amygdaloid complex

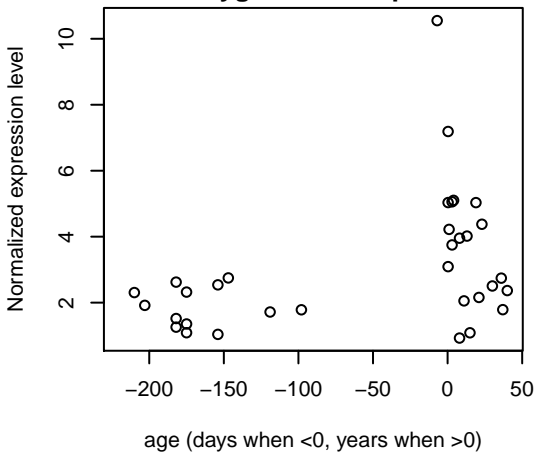

**LMCD1\_8591559\_8592135**  
(P=0.2168, Diff = -0.07)  
amygdaloid complex

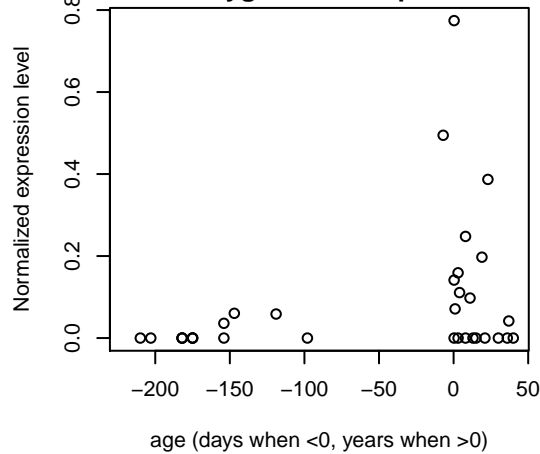

**LMCD1\_8607117\_8607333**  
(P=0.1654, Diff = -0.88)  
amygdaloid complex

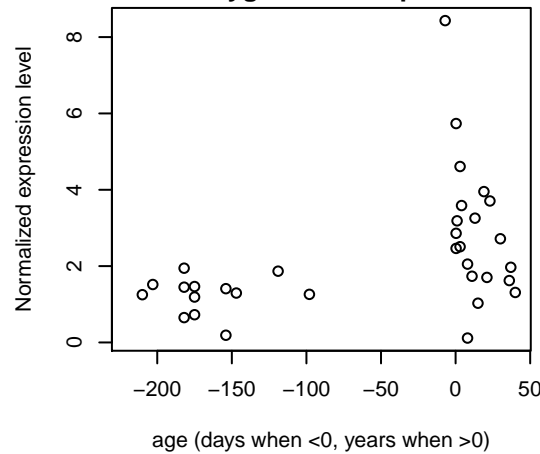

**LMCD1\_8609125\_8609805**  
(P=0.0026, Diff = -2.63)  
amygdaloid complex

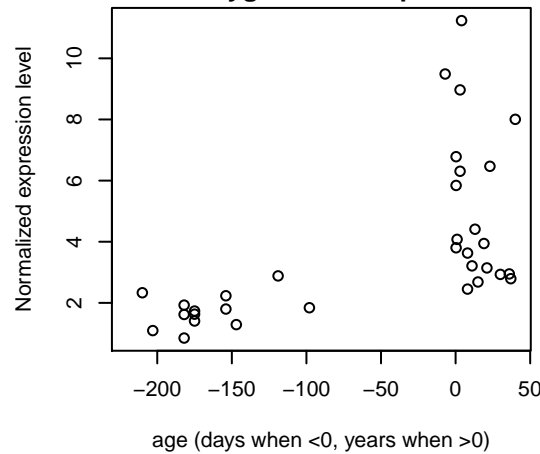

**WVOX\_78133550\_78133782**  
(P=0.4535, Diff = -0.55)  
amygdaloid complex

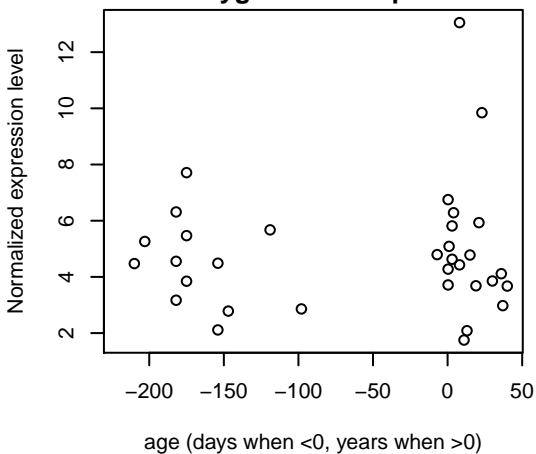

**WVOX\_78142319\_78142384**  
(P=0.7454, Diff = -0.32)  
amygdaloid complex

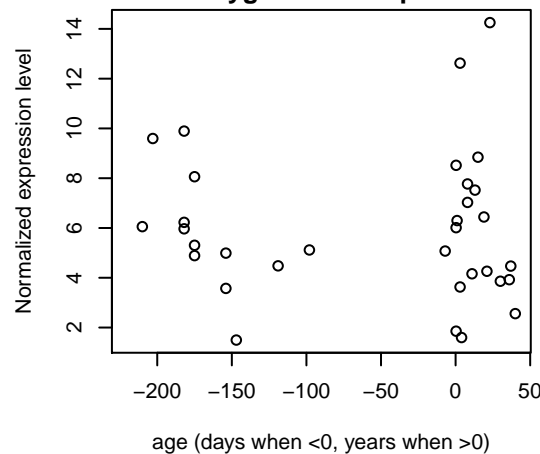

**WVOX\_78143674\_78143732**  
(P=0.7554, Diff = -0.37)  
amygdaloid complex

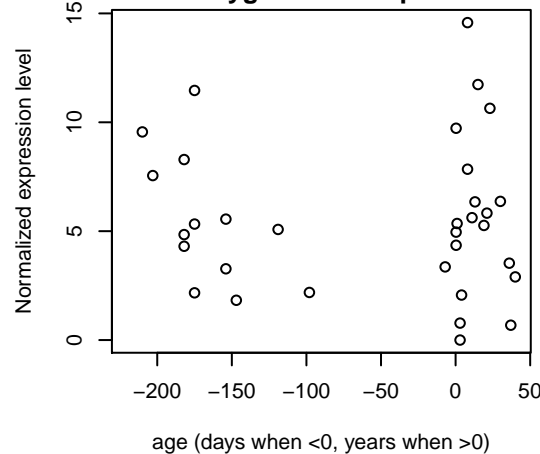

**WVOX\_78148872\_78149051**  
(P=0.2928, Diff = -0.75)  
amygdaloid complex

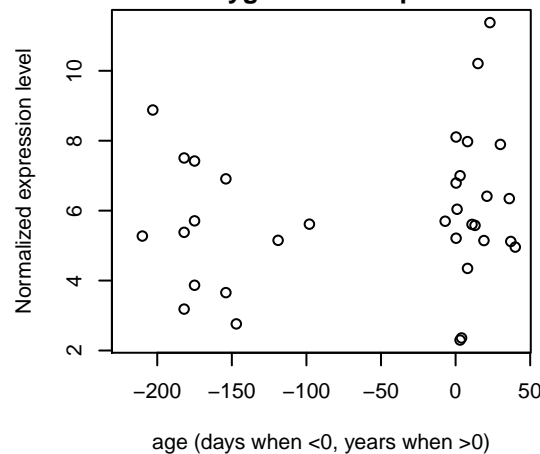

**WVOX\_78198079\_78198186**  
(P=0.036, Diff = -1.85)  
amygdaloid complex

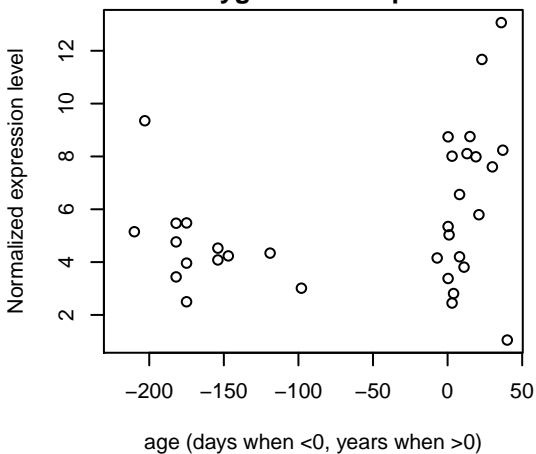

**WVOX\_78312499\_78312593**  
(P=0.1087, Diff = -0.1)  
amygdaloid complex

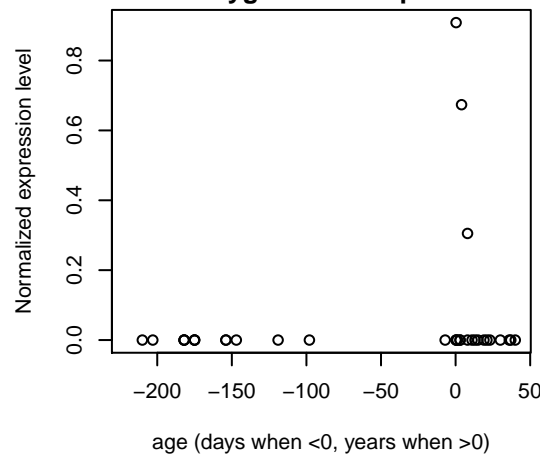

**WVOX\_78420756\_78420845**  
(P=0.0024, Diff = -4.33)  
amygdaloid complex

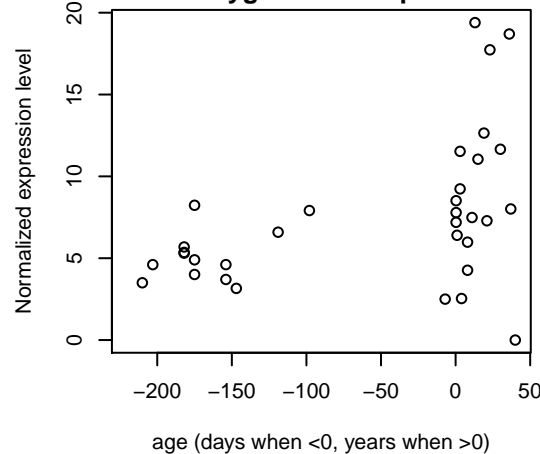

**WVOX\_78458766\_78458952**  
(P=0.0014, Diff = -3.98)  
amygdaloid complex

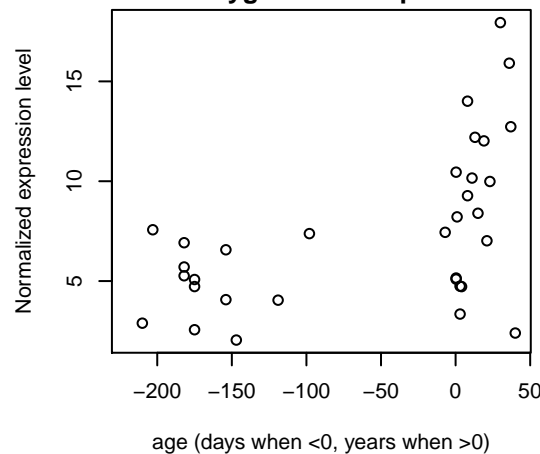

**WVOX\_78466384\_78466649**  
(P=6e-04, Diff = -3.06)  
amygdaloid complex

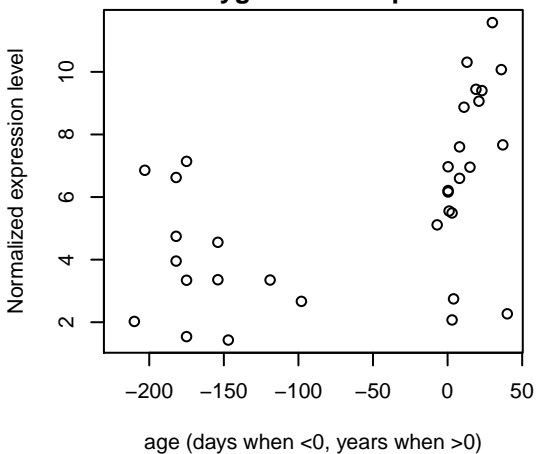

**WVOX\_78790836\_78790912**  
(P=0.1891, Diff = -0.14)  
amygdaloid complex

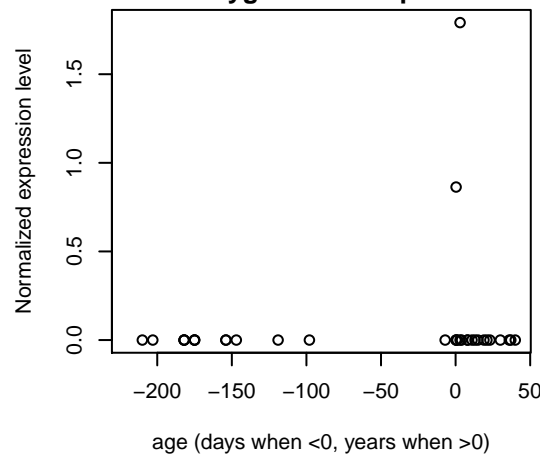

**WVOX\_79245504\_79246031**  
(P=0, Diff = -3.23)  
amygdaloid complex

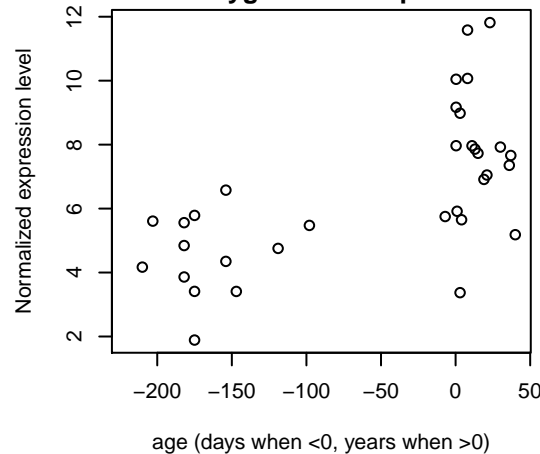

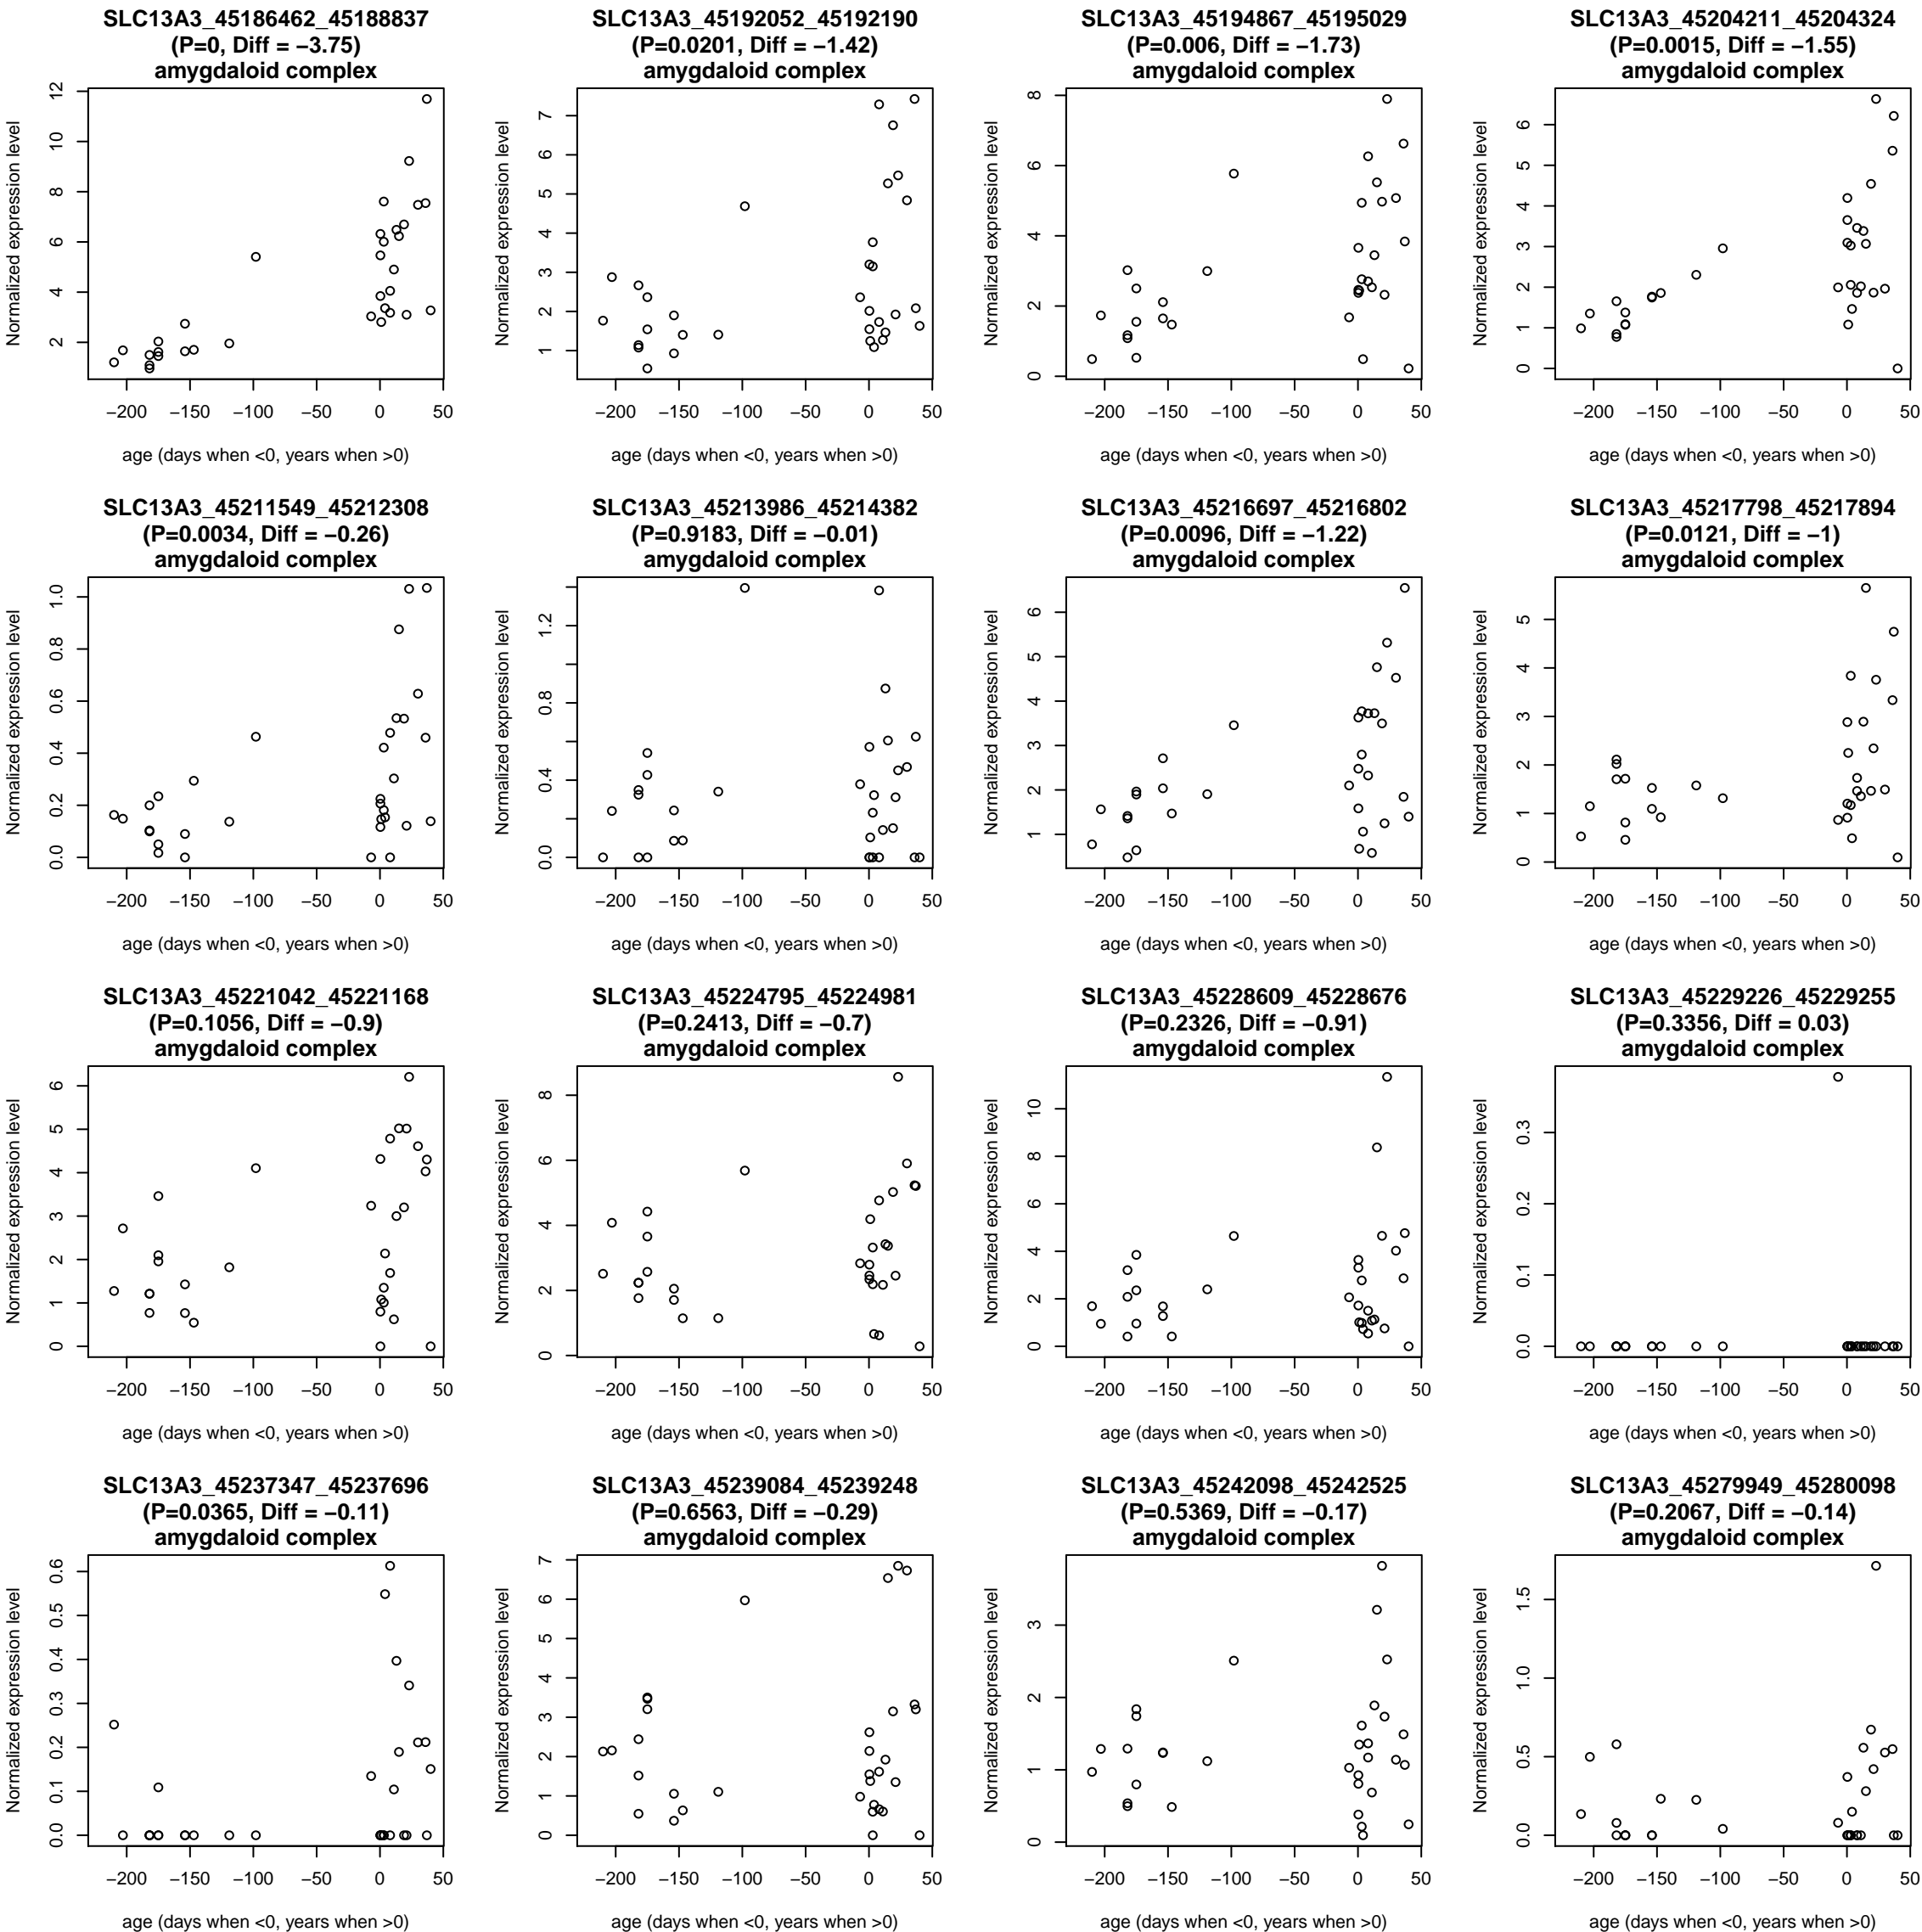

**SLC13A3\_45298681\_45298778**  
(P=0.0319, Diff = 0.43)  
amygdaloid complex

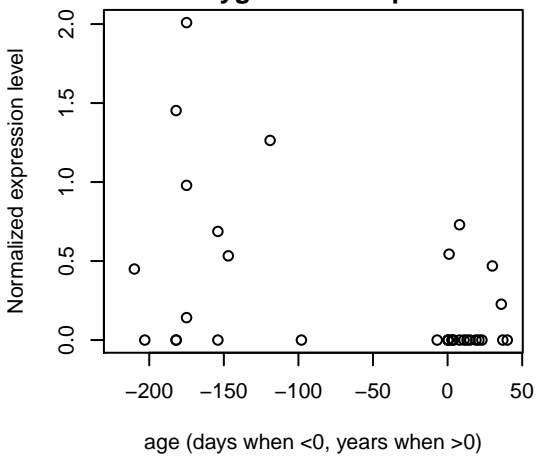

**SLC13A3\_45302302\_45302417**  
(P=0.5431, Diff = -0.07)  
amygdaloid complex

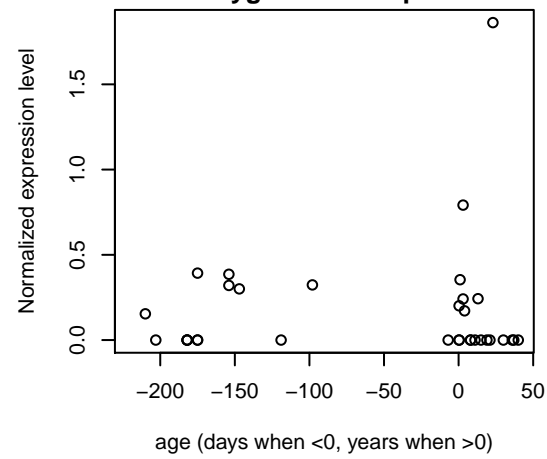

**SLC13A3\_45304585\_45304714**  
(P=0.2943, Diff = -0.13)  
amygdaloid complex

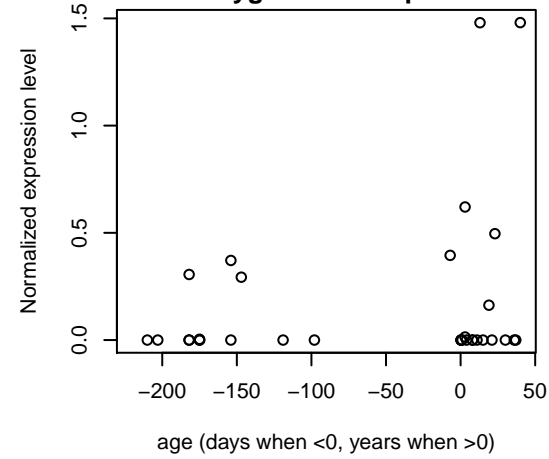

HTR1B\_78171947\_78173490  
(P=0.5127, Diff = 0.21)  
amygdaloid complex

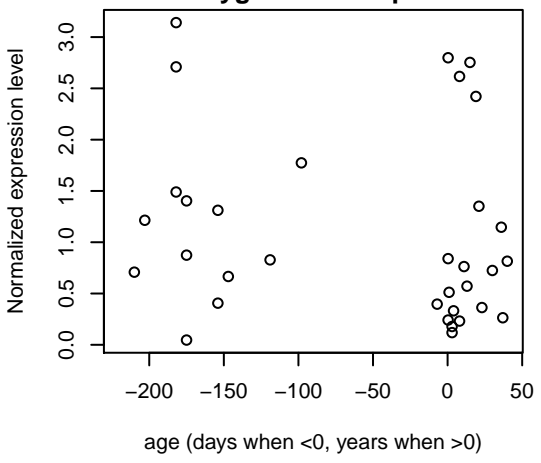



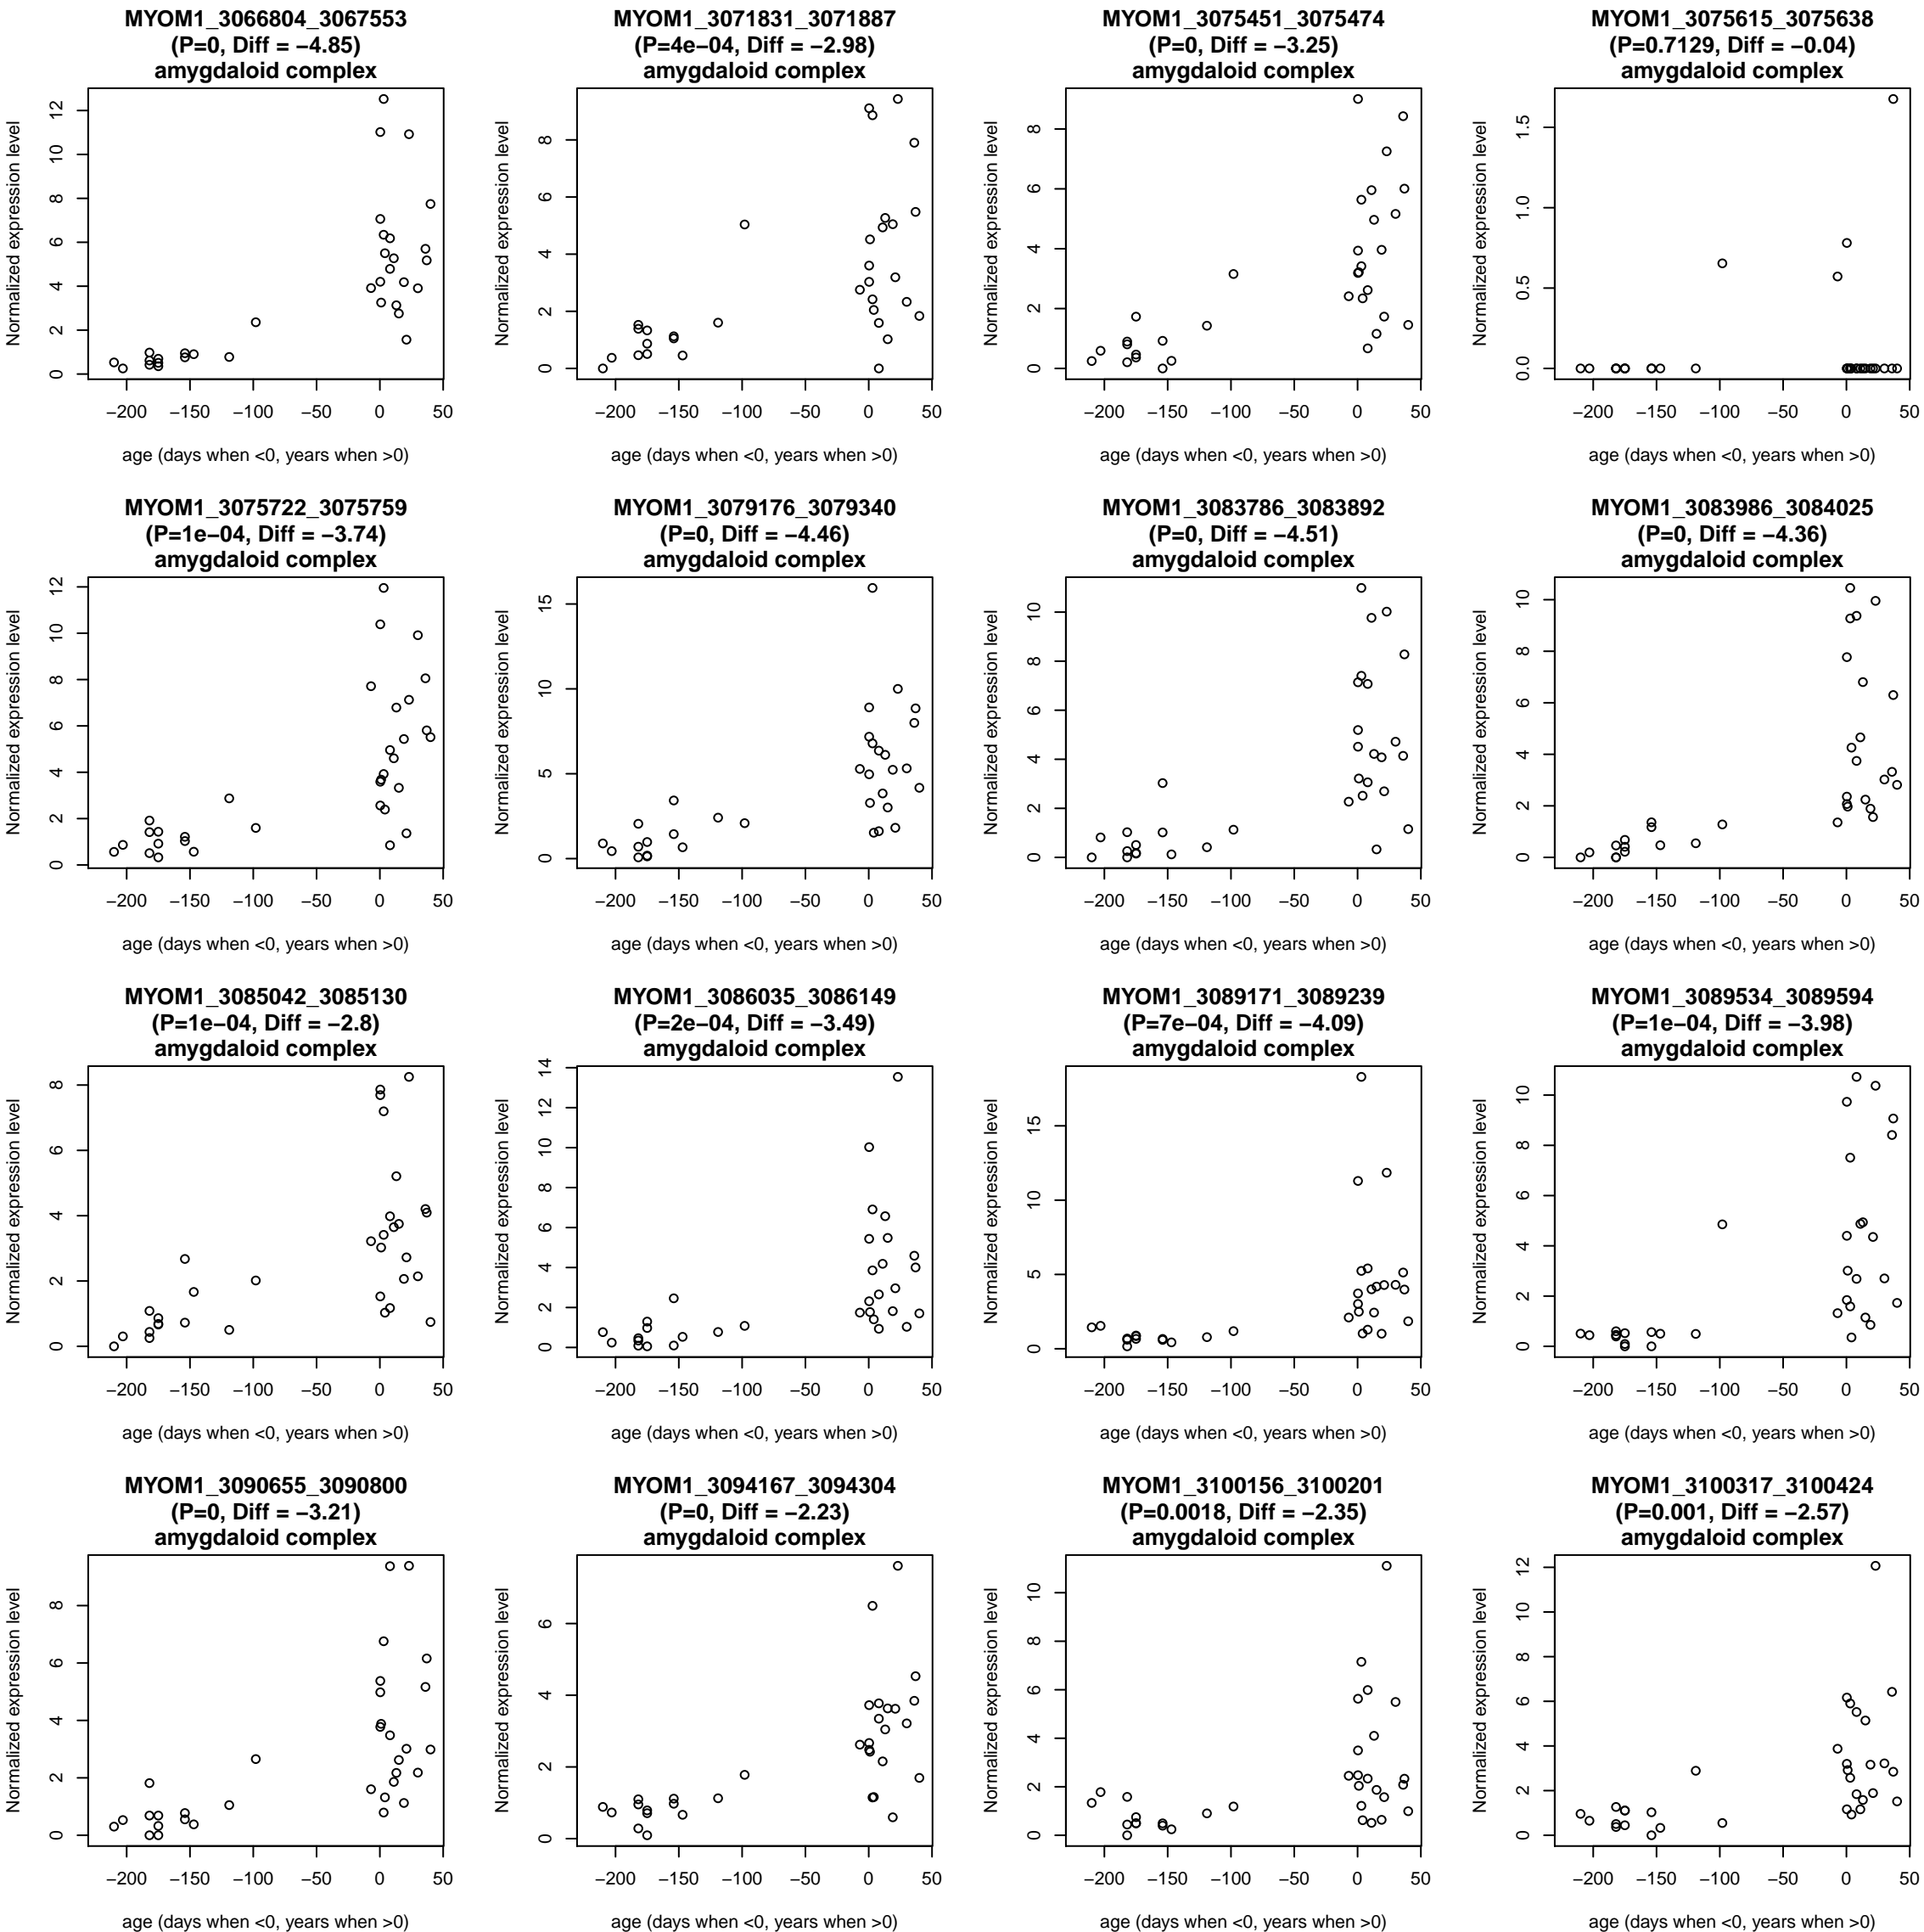

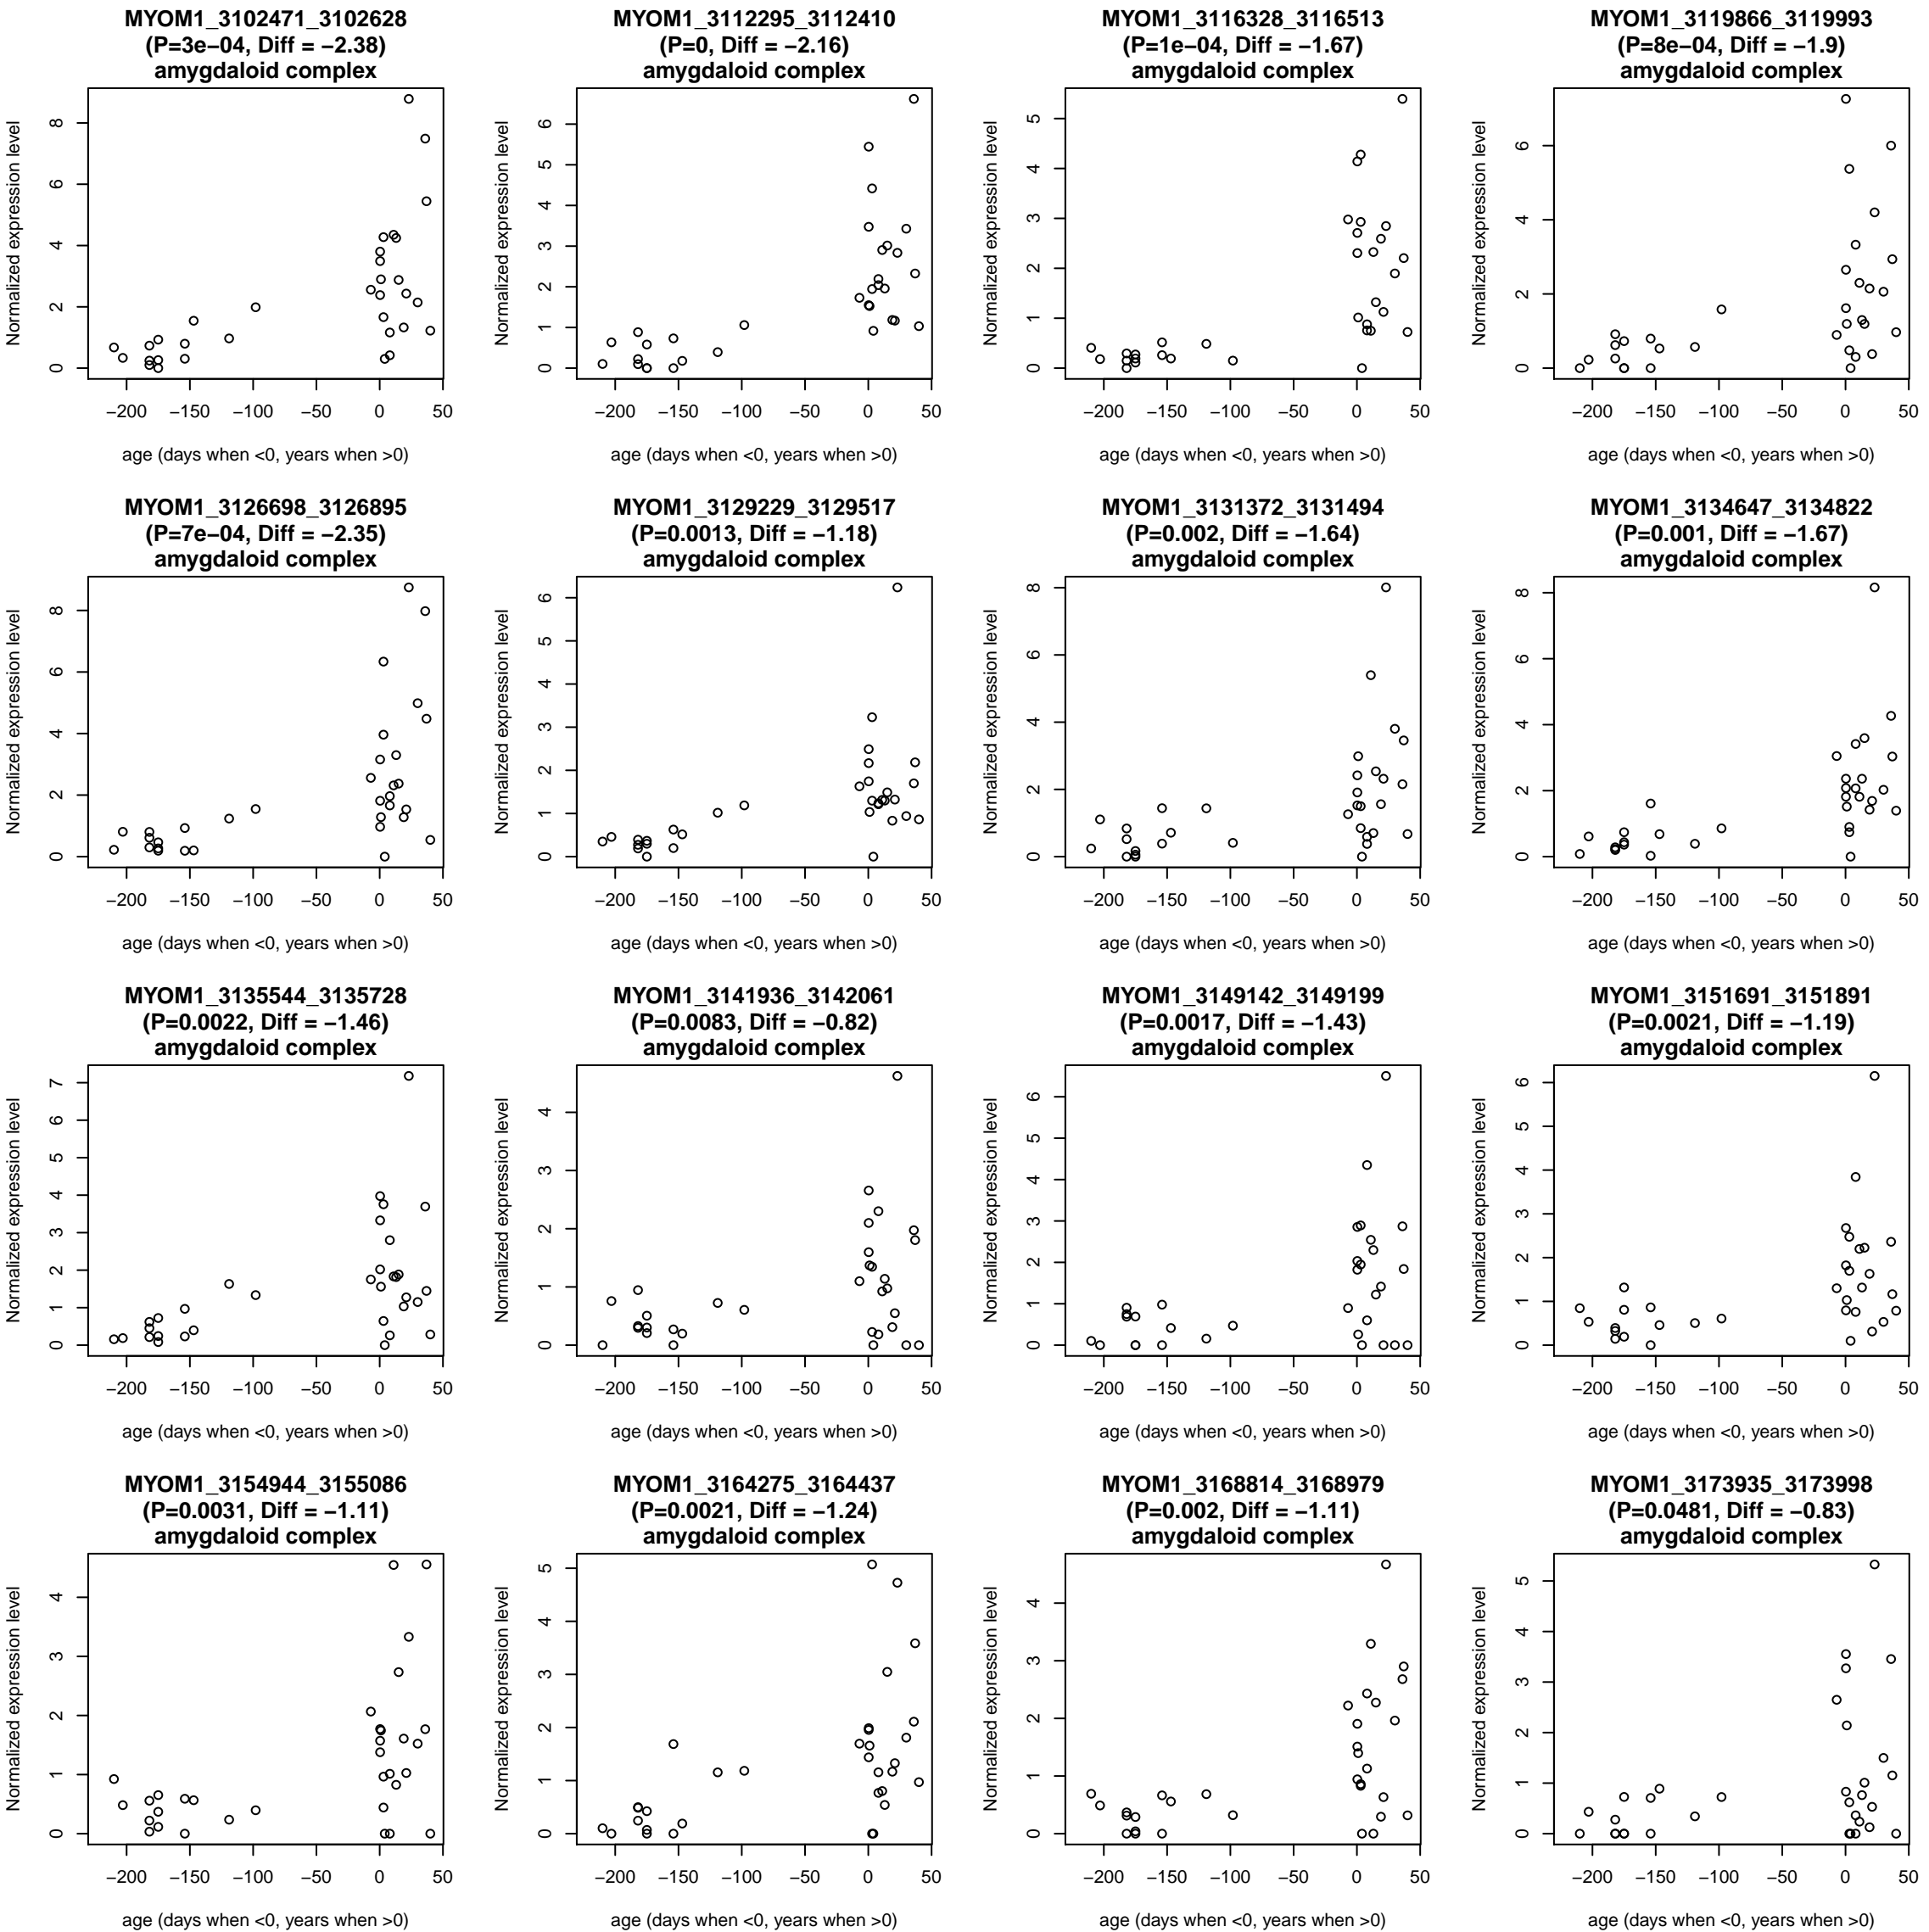

**MYOM1\_3174117\_3174206**  
(P=7e-04, Diff = -1.26)  
amygdaloid complex

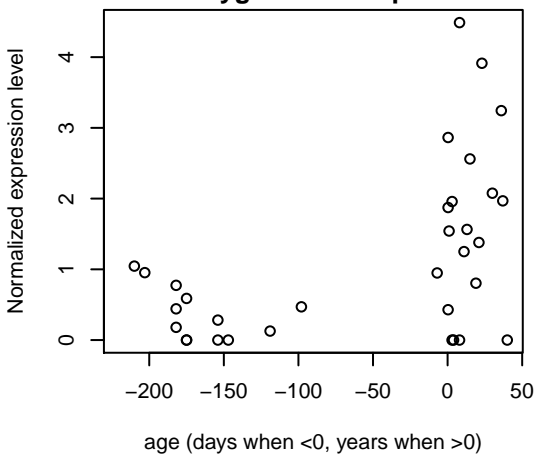

**MYOM1\_3176039\_3176132**  
(P=0.0079, Diff = -0.66)  
amygdaloid complex

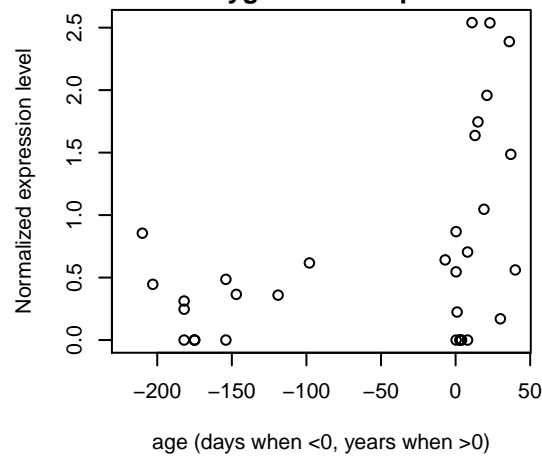

**MYOM1\_3187477\_3187635**  
(P=0.0084, Diff = -0.81)  
amygdaloid complex

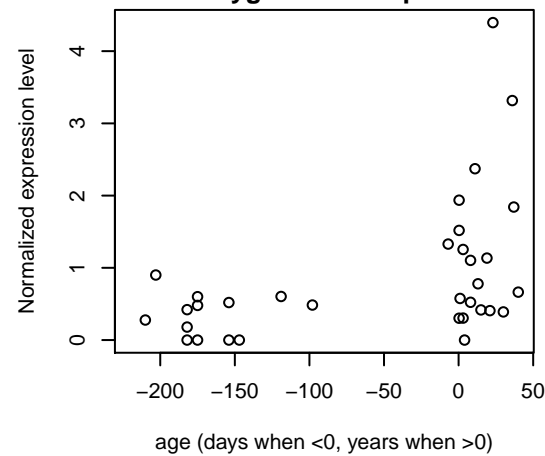

**MYOM1\_3188745\_3189085**  
(P=9e-04, Diff = -1.05)  
amygdaloid complex

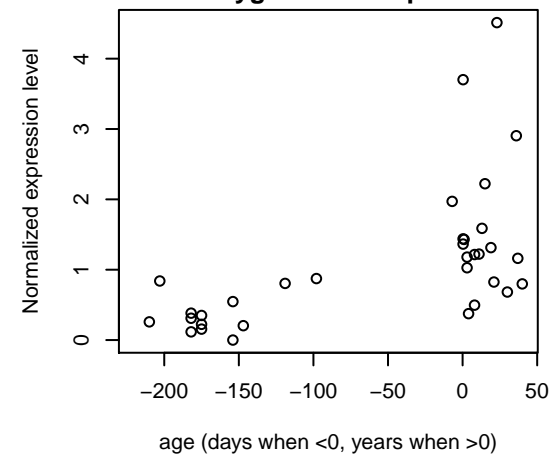

**MYOM1\_3193815\_3193956**  
(P=0.0737, Diff = -0.65)  
amygdaloid complex

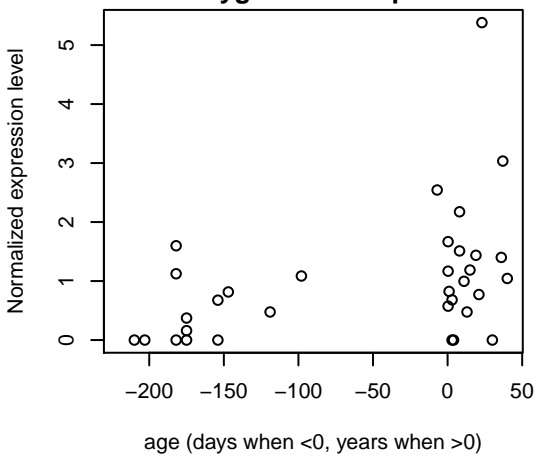

**MYOM1\_3214931\_3215249**  
(P=0.0108, Diff = -0.54)  
amygdaloid complex

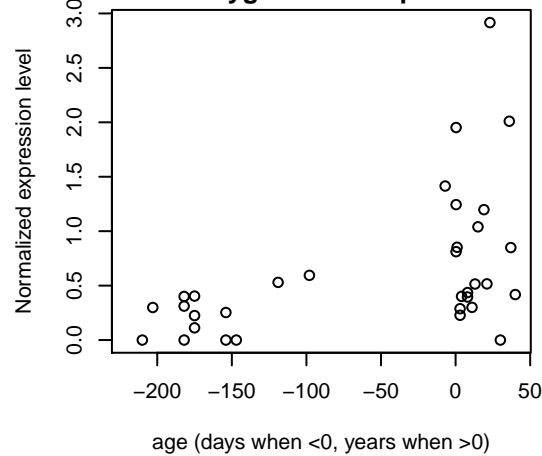

**MYOM1\_3219800\_3220106**  
(P=0.3052, Diff = -0.06)  
amygdaloid complex

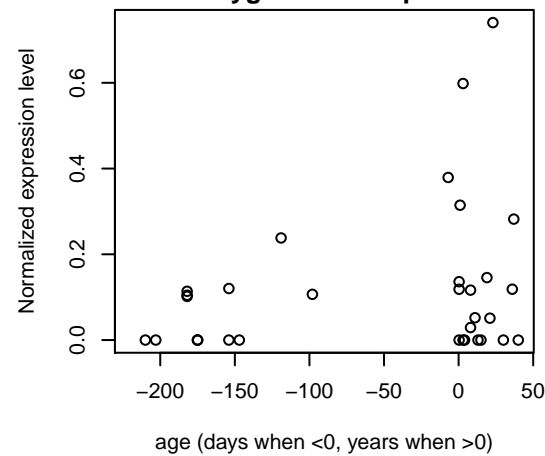

**USP44\_95910335\_95912129**  
(P=0.0167, Diff = 0.14)  
amygdaloid complex

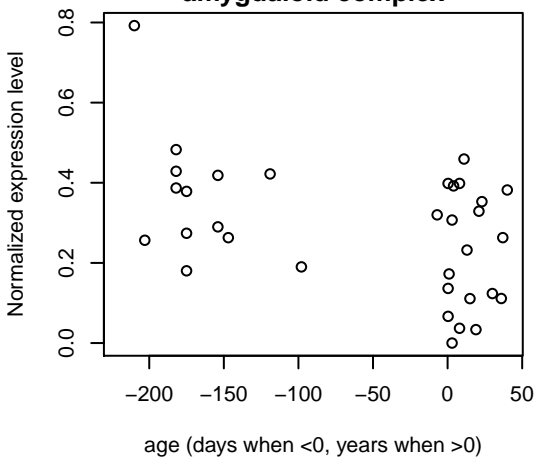

**USP44\_95914772\_95914978**  
(P=0.1601, Diff = 0.13)  
amygdaloid complex

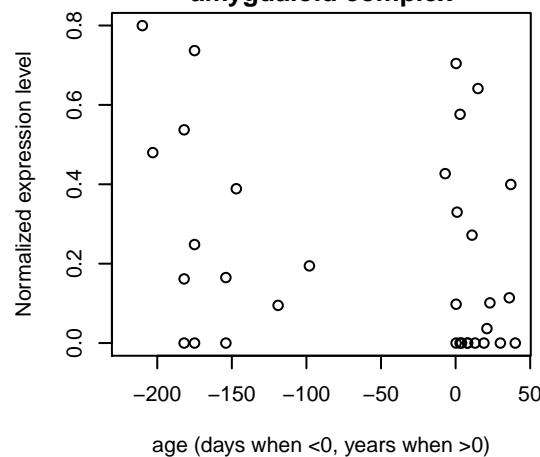

**USP44\_95918295\_95918564**  
(P=0.152, Diff = 0.08)  
amygdaloid complex

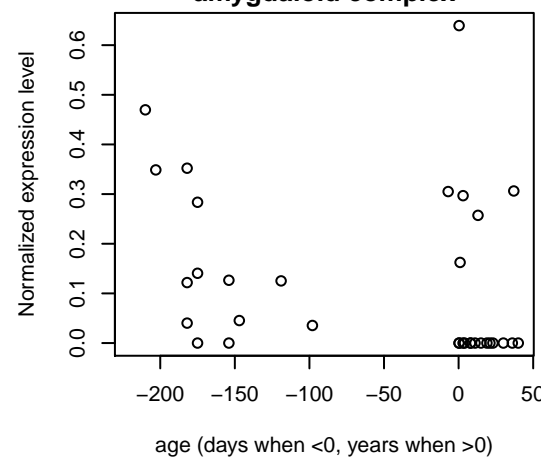

**USP44\_95922582\_95922778**  
(P=0.372, Diff = 0.09)  
amygdaloid complex

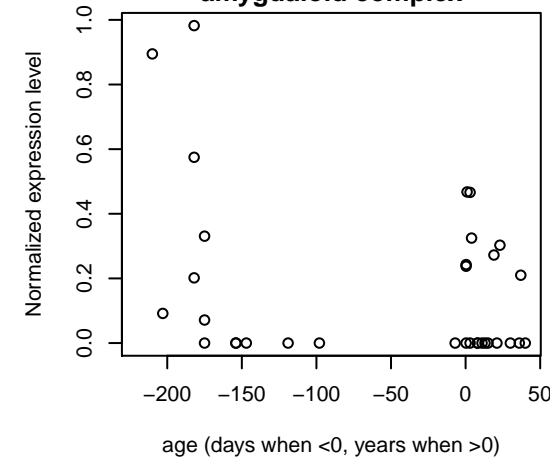

**USP44\_95926604\_95928102**  
(P=0.0045, Diff = 0.2)  
amygdaloid complex

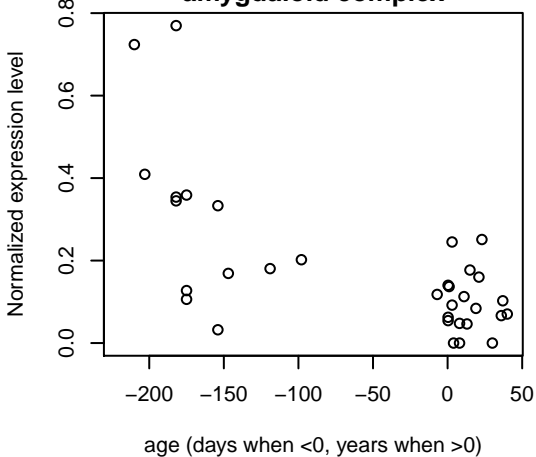

**USP44\_95929148\_95929202**  
(P=0.3306, Diff = -0.03)  
amygdaloid complex

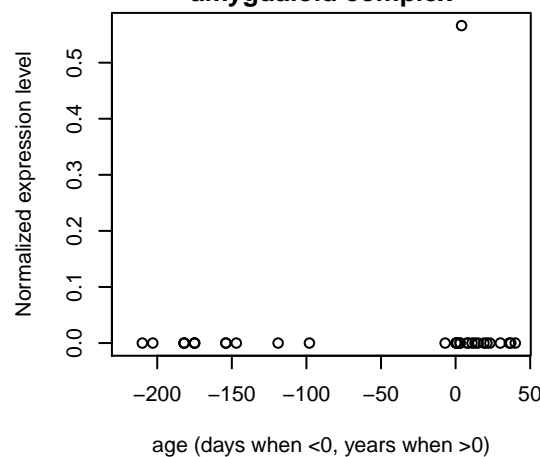

**USP44\_95940225\_95940766**  
(P=0.9557, Diff = 0)  
amygdaloid complex

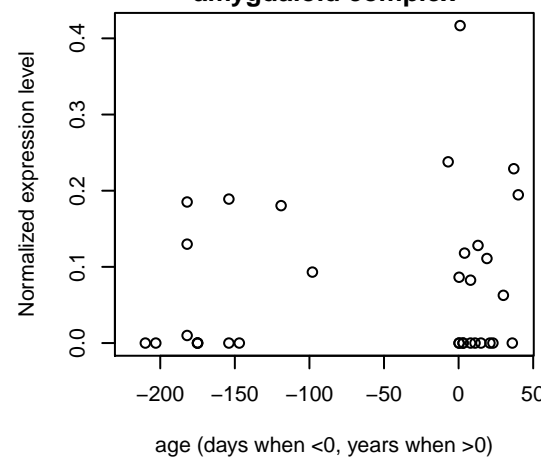

**USP44\_95941758\_95942048**  
(P=0.3933, Diff = 0.03)  
amygdaloid complex

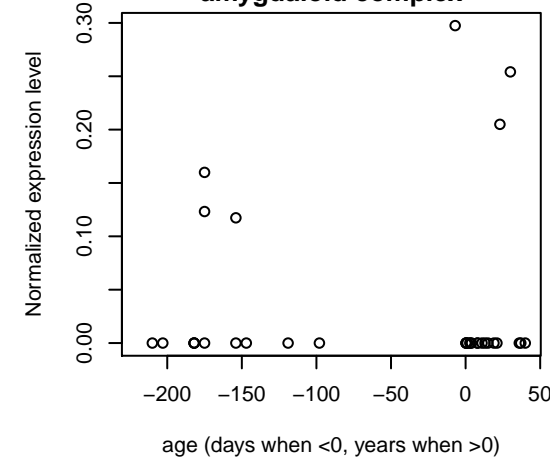

**USP44\_95942301\_95942620**  
(P=0.7117, Diff = 0.01)  
amygdaloid complex

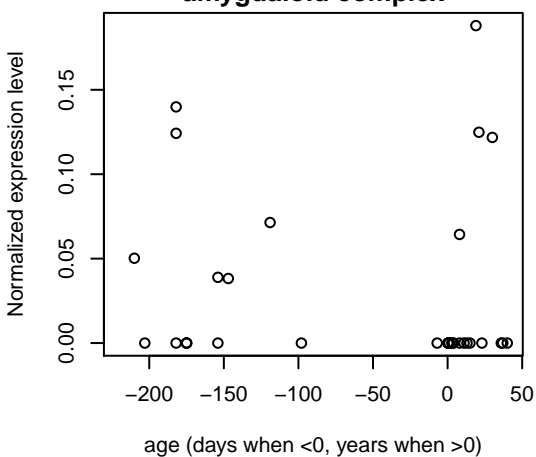

**USP44\_95945047\_95945266**  
(P=NaN, Diff = 0)  
amygdaloid complex

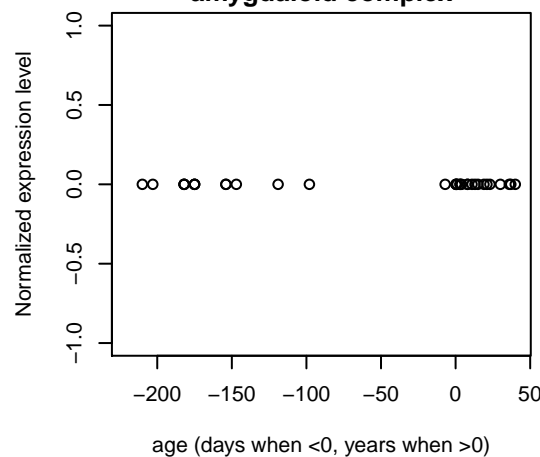

**IGFBP7\_57896938\_57897502**  
(P=0.3134, Diff = -12.76)  
amygdaloid complex

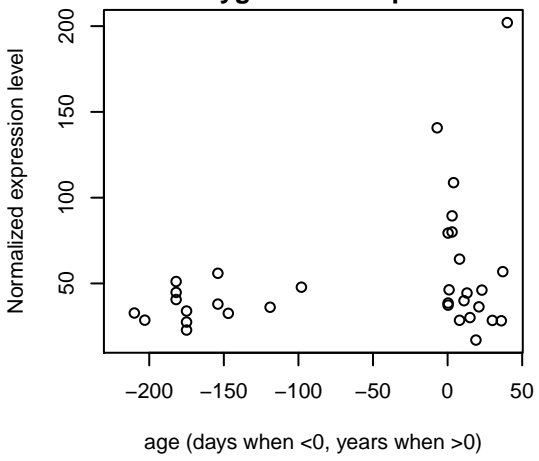

**IGFBP7\_57898203\_57898718**  
(P=0.3394, Diff = -14.74)  
amygdaloid complex

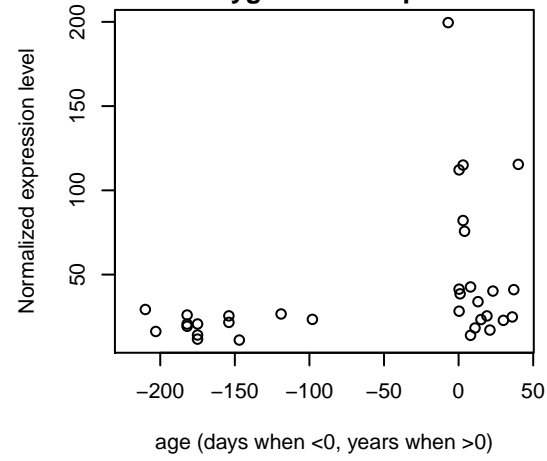

**IGFBP7\_57899360\_57899477**  
(P=0.6773, Diff = -27.2)  
amygdaloid complex

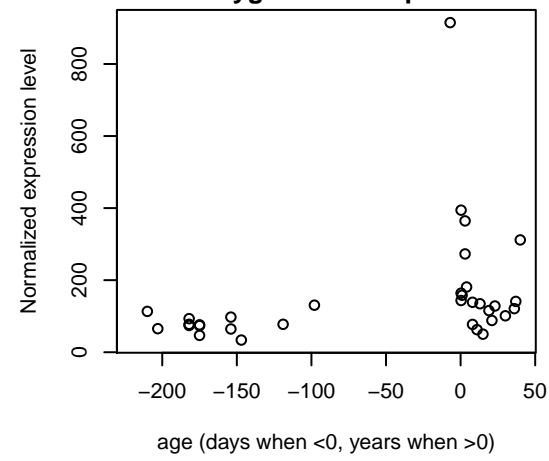

**IGFBP7\_57906989\_57907099**  
(P=0.7131, Diff = -23.95)  
amygdaloid complex

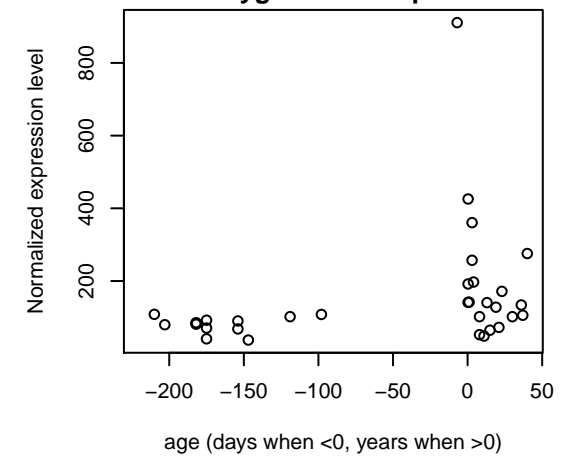

**IGFBP7\_57976042\_57976551**  
(P=0.7643, Diff = 5.13)  
amygdaloid complex

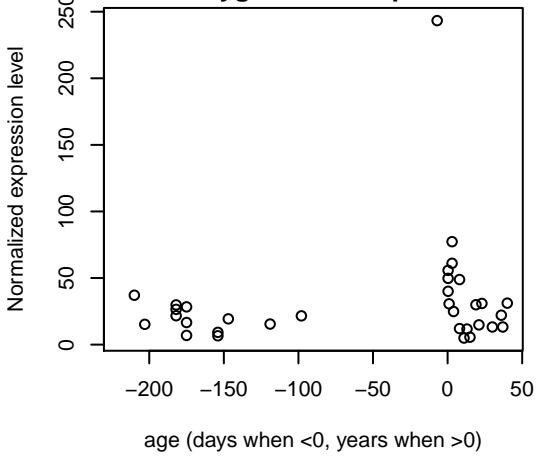

**OPA1\_193310932\_193311198**  
**(P=0.0078, Diff = 2.46)**  
**amygdaloid complex**

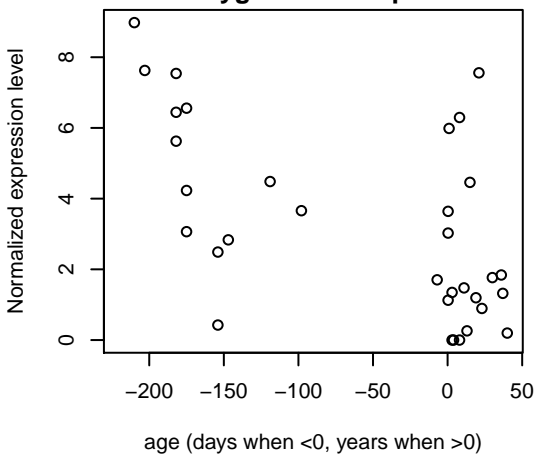

**OPA1\_193321288\_193321346**  
**(P=0.3869, Diff = 0.1)**  
**amygdaloid complex**

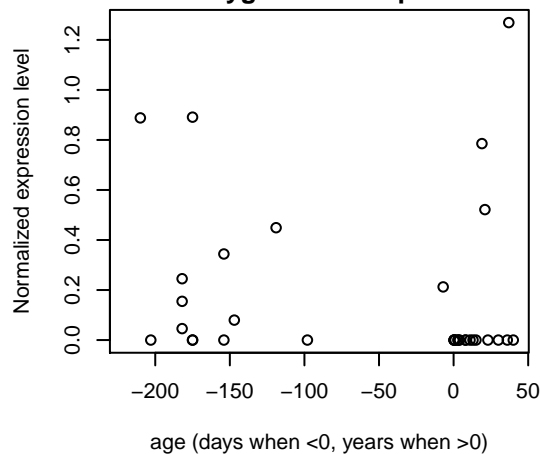

**OPA1\_193332511\_193332830**  
**(P=0.1992, Diff = 3.22)**  
**amygdaloid complex**

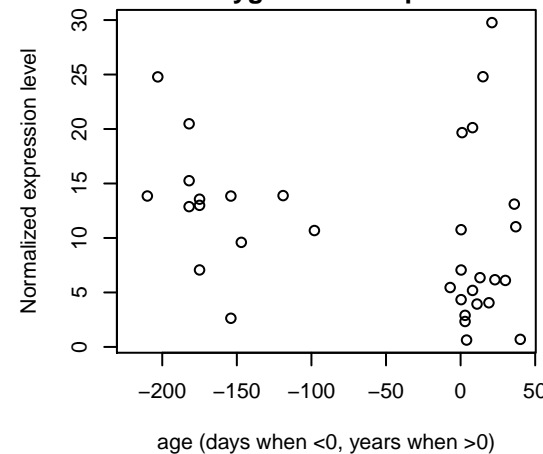

**OPA1\_193333462\_193333559**  
**(P=0.195, Diff = 4.24)**  
**amygdaloid complex**

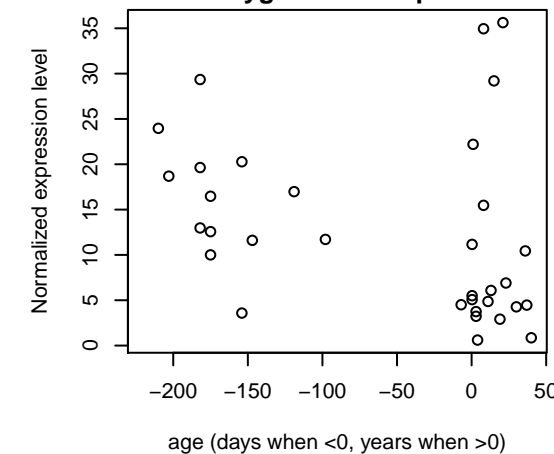

**OPA1\_193334966\_193335074**  
**(P=0.3899, Diff = 2.83)**  
**amygdaloid complex**

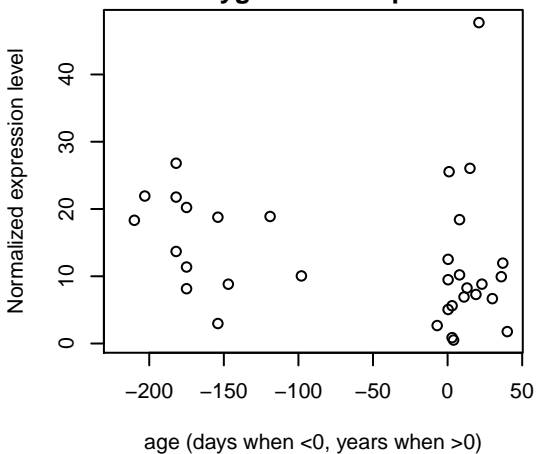

**OPA1\_193335572\_193335626**  
**(P=0.8921, Diff = -0.06)**  
**amygdaloid complex**

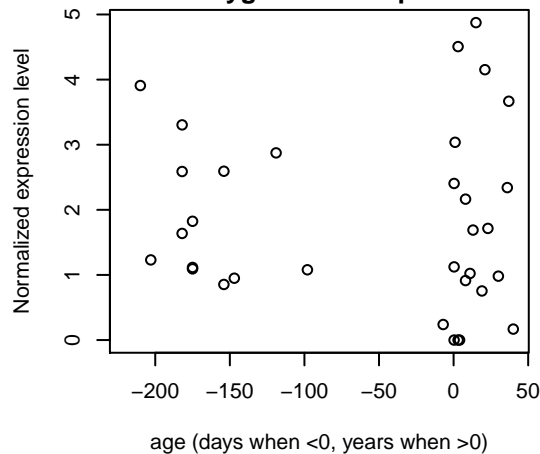

**OPA1\_193336615\_193336726**  
**(P=0.2929, Diff = 2.24)**  
**amygdaloid complex**

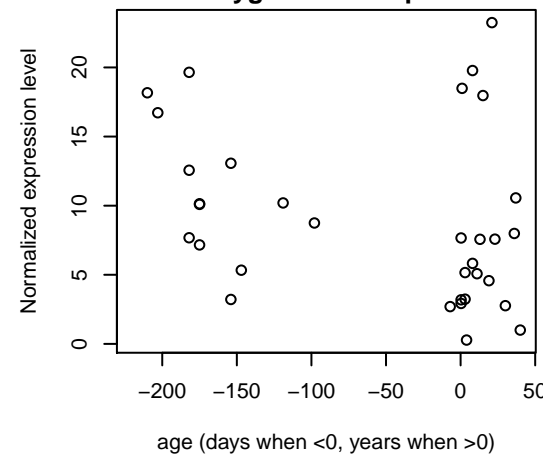

**OPA1\_193343846\_193343991**  
**(P=0.0017, Diff = 1.93)**  
**amygdaloid complex**

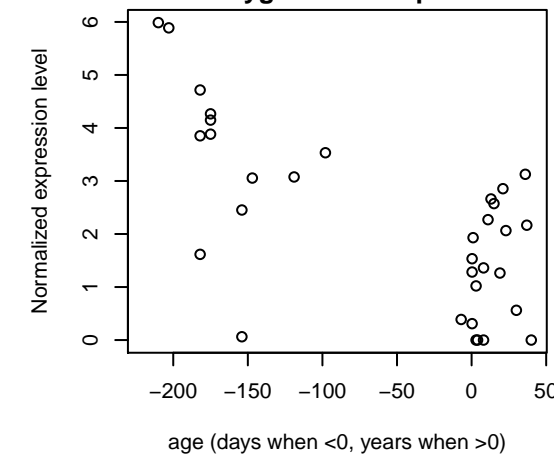

**OPA1\_193346297\_193346333**  
**(P=0.401, Diff = 0.08)**  
**amygdaloid complex**

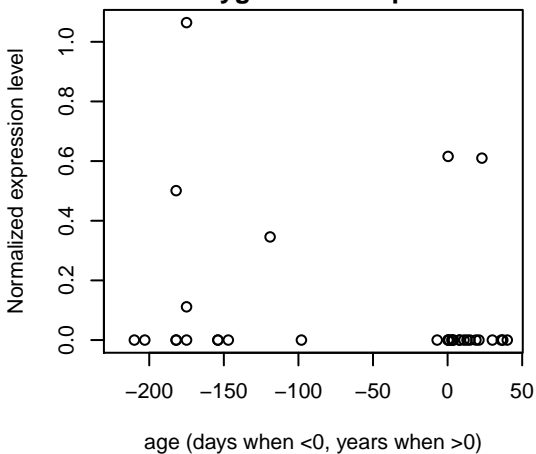

**OPA1\_193349400\_193349454**  
**(P=0.0476, Diff = 6.69)**  
**amygdaloid complex**

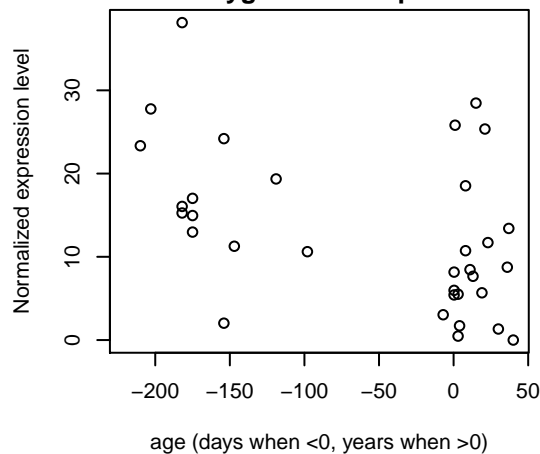

**OPA1\_193353206\_193353311**  
**(P=0.1655, Diff = 3.26)**  
**amygdaloid complex**

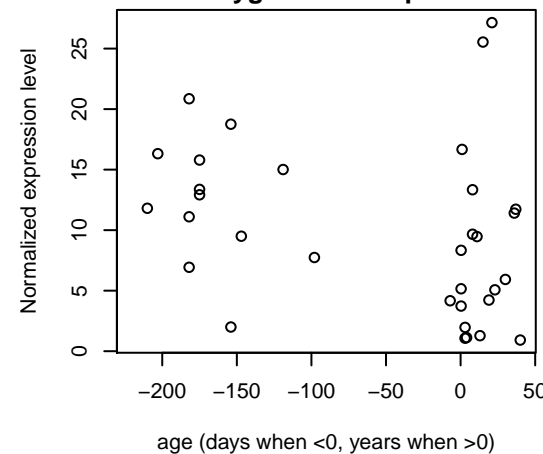

**OPA1\_193354983\_193355070**  
**(P=0.1846, Diff = 4.36)**  
**amygdaloid complex**

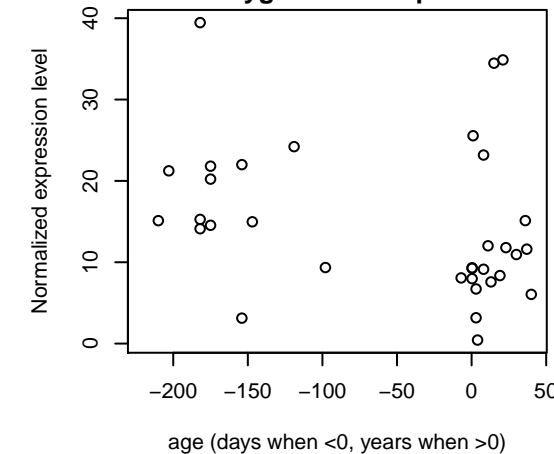

**OPA1\_193355740\_193355854**  
**(P=0.0215, Diff = 8.74)**  
**amygdaloid complex**

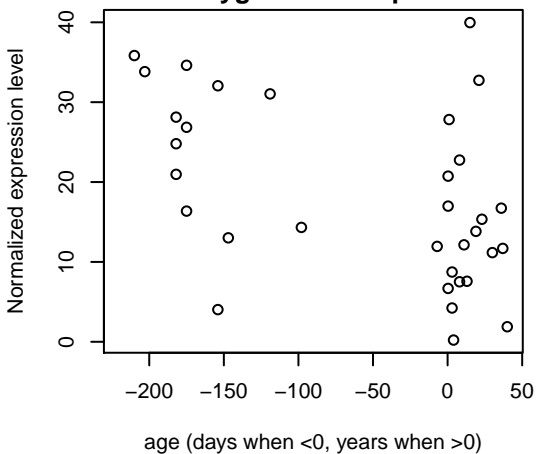

**OPA1\_193360553\_193360634**  
**(P=0.0677, Diff = 6.82)**  
**amygdaloid complex**

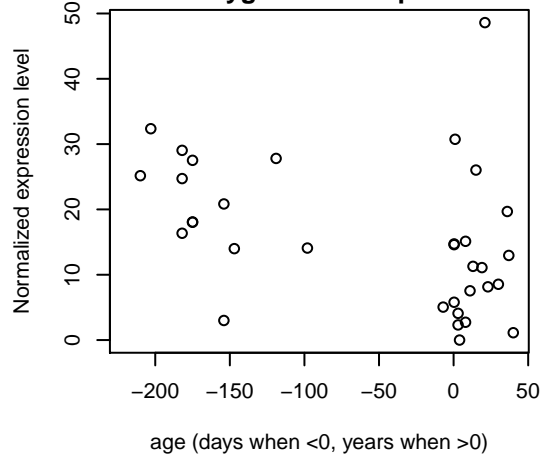

**OPA1\_193360763\_193360838**  
**(P=0.0596, Diff = 6.43)**  
**amygdaloid complex**

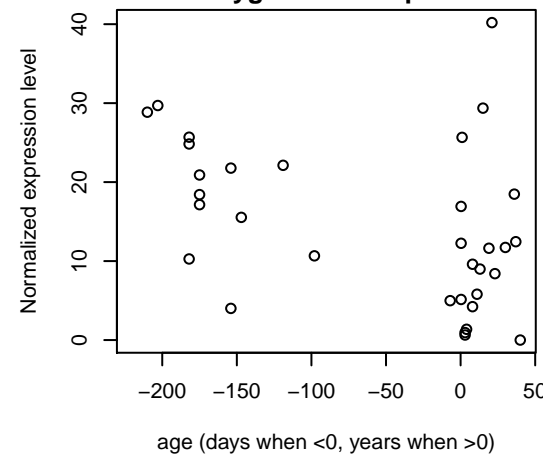

**OPA1\_193361161\_193361233**  
**(P=0.0199, Diff = 8.58)**  
**amygdaloid complex**

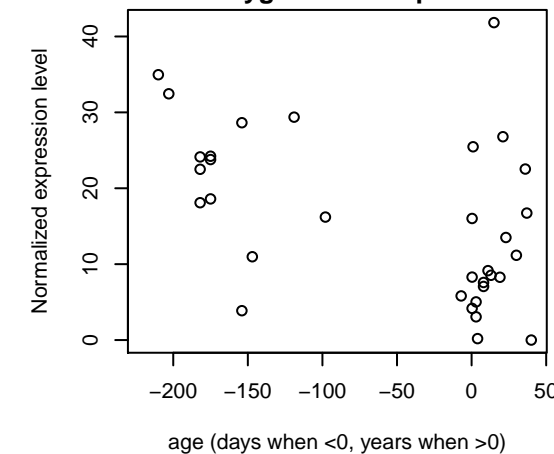

**OPA1\_193361316\_193361416**  
**(P=0.2121, Diff = 4.42)**  
**amygdaloid complex**

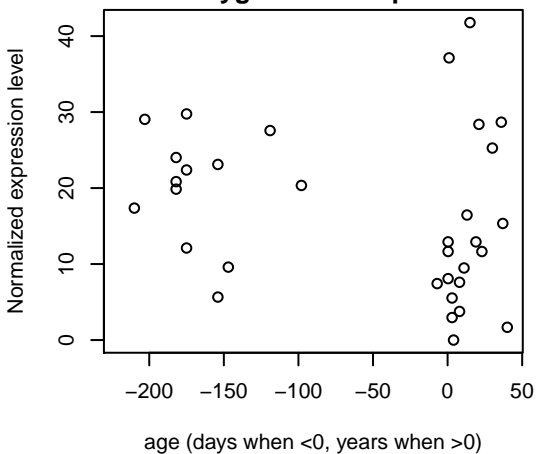

**OPA1\_193361763\_193361940**  
**(P=0.0818, Diff = 4.48)**  
**amygdaloid complex**

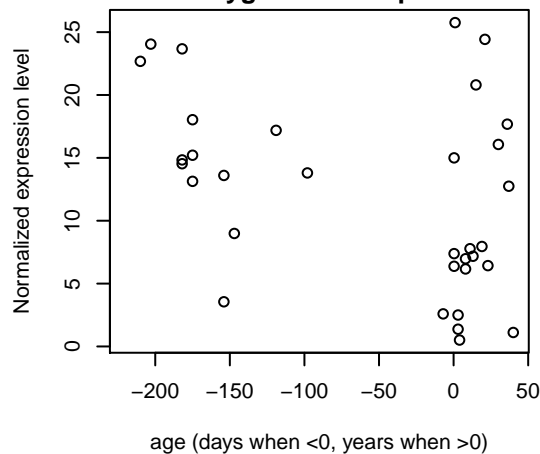

**OPA1\_193363341\_193363414**  
**(P=0.4557, Diff = 2.49)**  
**amygdaloid complex**

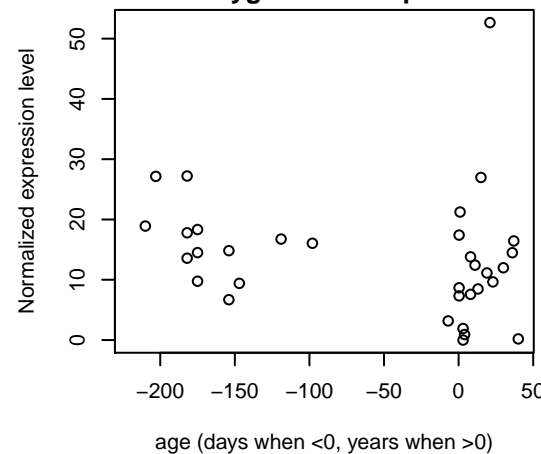

**OPA1\_193363516\_193363589**  
**(P=0.5084, Diff = 2.45)**  
**amygdaloid complex**

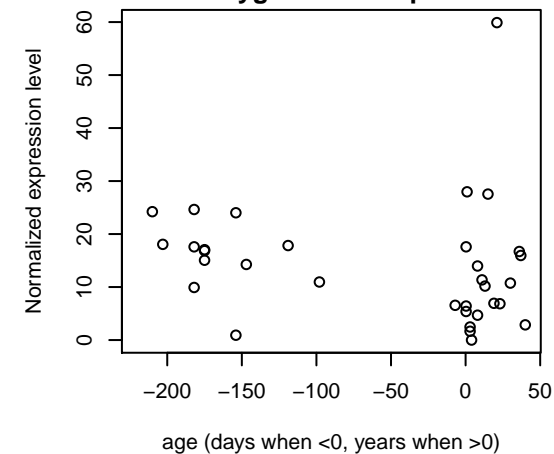

**OPA1\_193364853\_193364969**  
**(P=0.3056, Diff = 3.89)**  
**amygdaloid complex**

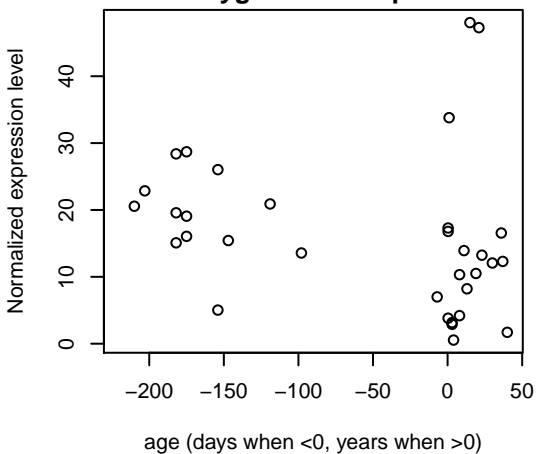

**OPA1\_193365858\_193366249**  
**(P=0.0683, Diff = 1.02)**  
**amygdaloid complex**

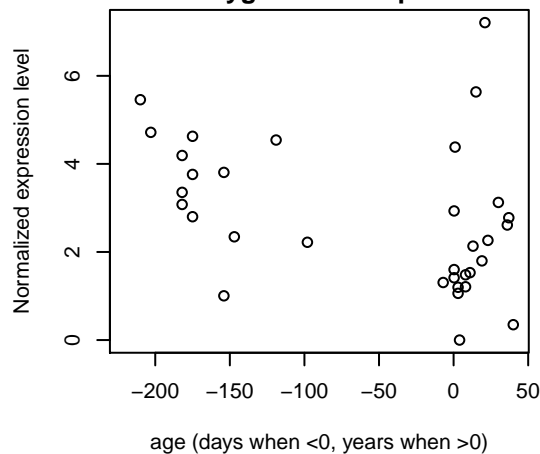

**OPA1\_193366554\_193366660**  
**(P=0.8603, Diff = 0.59)**  
**amygdaloid complex**

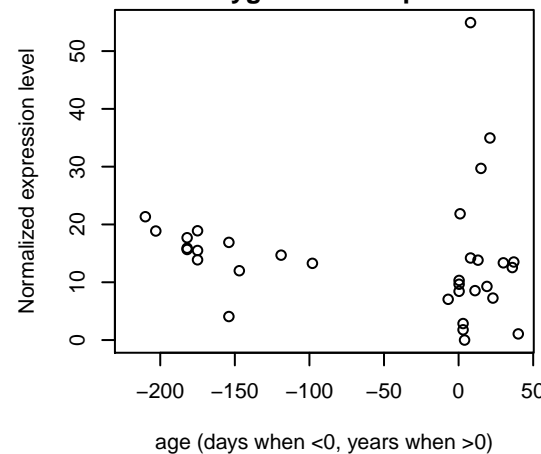

**OPA1\_193372650\_193372816**  
**(P=0.488, Diff = 3.15)**  
**amygdaloid complex**

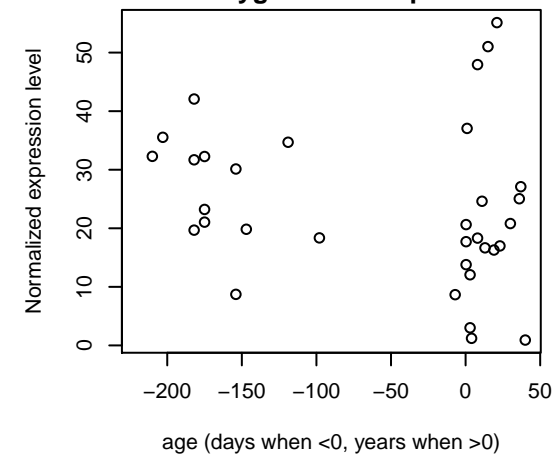

**OPA1\_193374868\_193375021**  
**(P=0.1766, Diff = 5.42)**  
**amygdaloid complex**

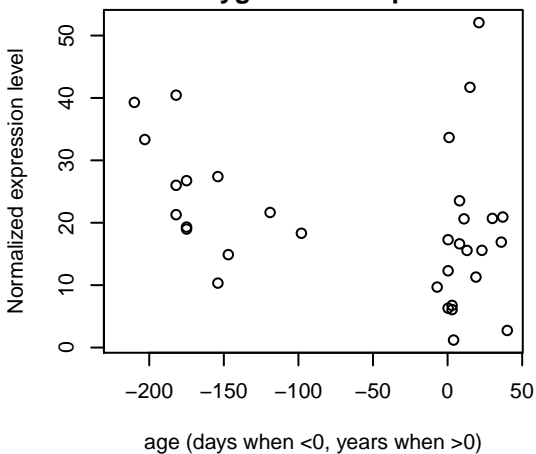

**OPA1\_193376675\_193376784**  
**(P=0.2101, Diff = 5.4)**  
**amygdaloid complex**

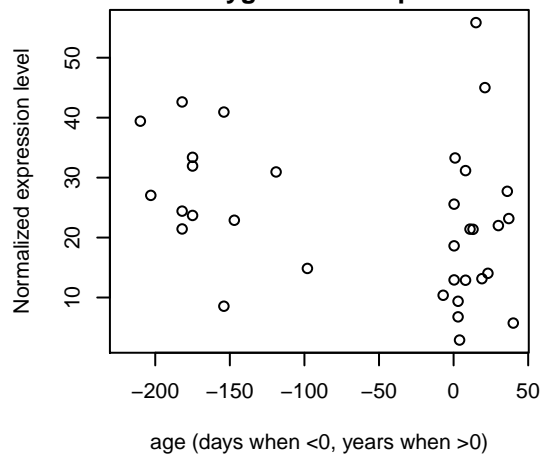

**OPA1\_193377270\_193377350**  
**(P=0.6105, Diff = 2.18)**  
**amygdaloid complex**

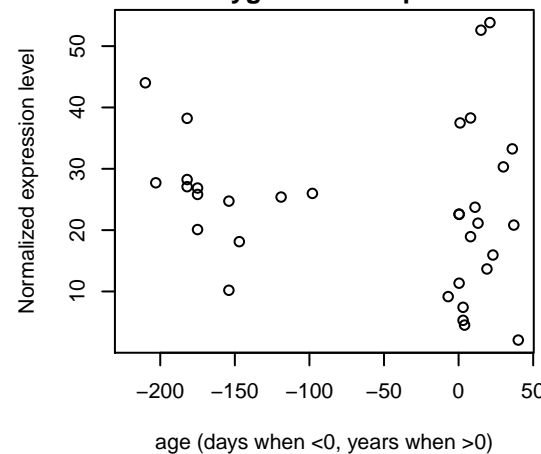

**OPA1\_193380610\_193380751**  
**(P=0.5957, Diff = 3.7)**  
**amygdaloid complex**

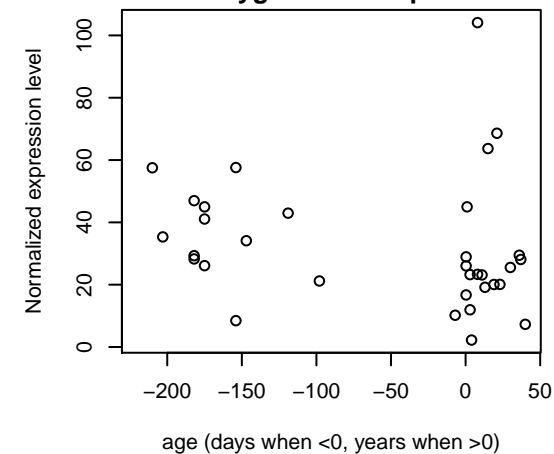

**OPA1\_193382668\_193382785**  
**(P=0.871, Diff = 0.63)**  
**amygdaloid complex**

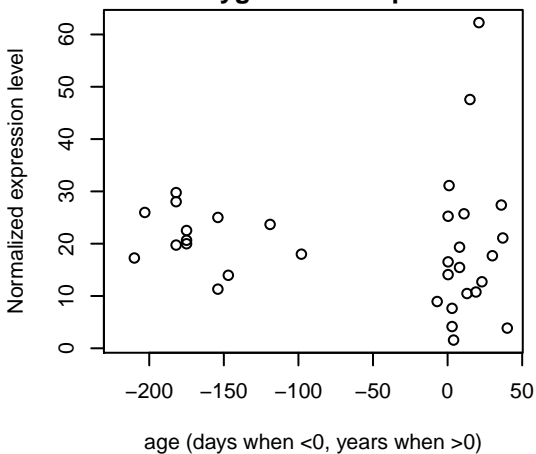

**OPA1\_193384084\_193384178**  
**(P=0.2665, Diff = 5.6)**  
**amygdaloid complex**

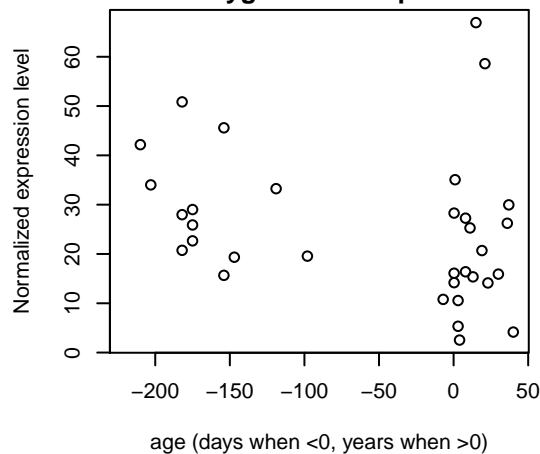

**OPA1\_193384958\_193385069**  
**(P=0.541, Diff = 2.32)**  
**amygdaloid complex**

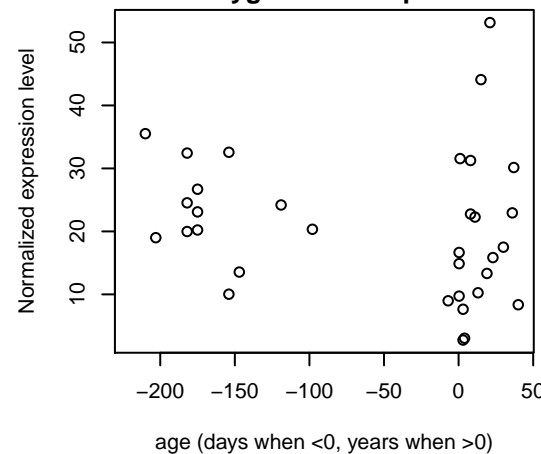

**OPA1\_193385159\_193385244**  
**(P=0.0971, Diff = 0.05)**  
**amygdaloid complex**

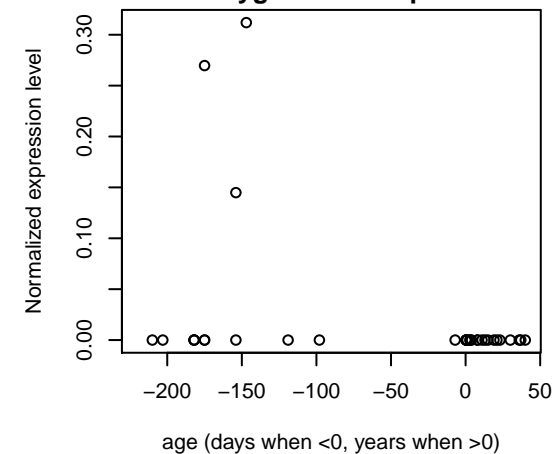

**OPA1\_193386103\_193386720**  
(P=0.8532, Diff = -0.01)  
amygdaloid complex

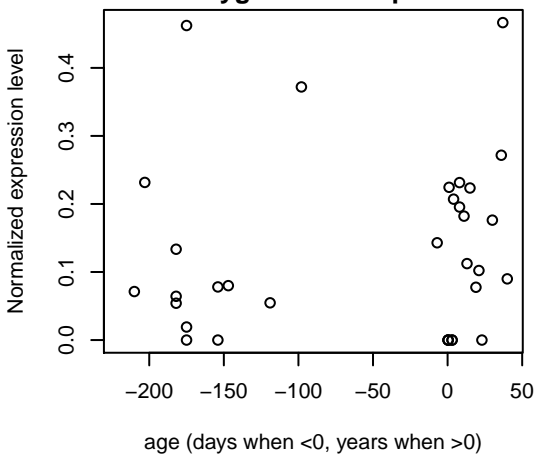

**OPA1\_193409182\_193409921**  
(P=0.2682, Diff = 0.36)  
amygdaloid complex

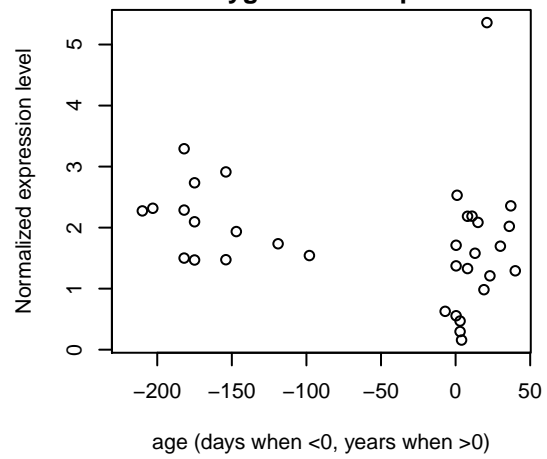

**OPA1\_193412394\_193415612**  
(P=0.0858, Diff = -4.12)  
amygdaloid complex

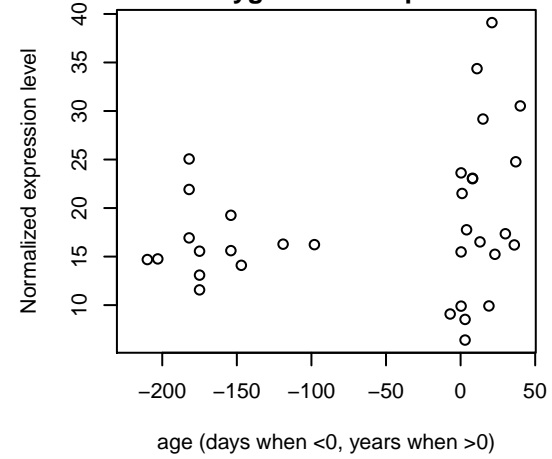



**ZMAT4\_40388108\_40389757**  
(P=4e-04, Diff = -2.53)  
amygdaloid complex

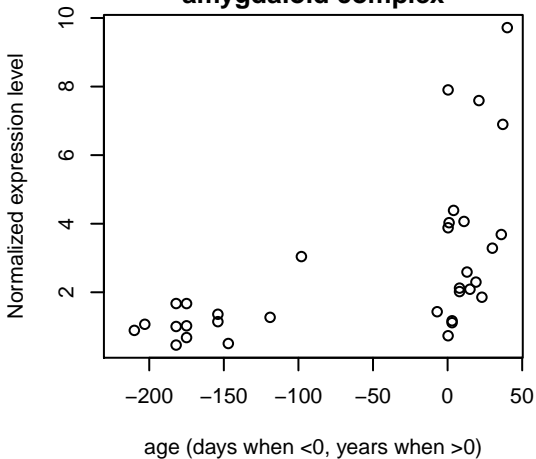

**ZMAT4\_40438683\_40438780**  
(P=0.0212, Diff = -2.29)  
amygdaloid complex

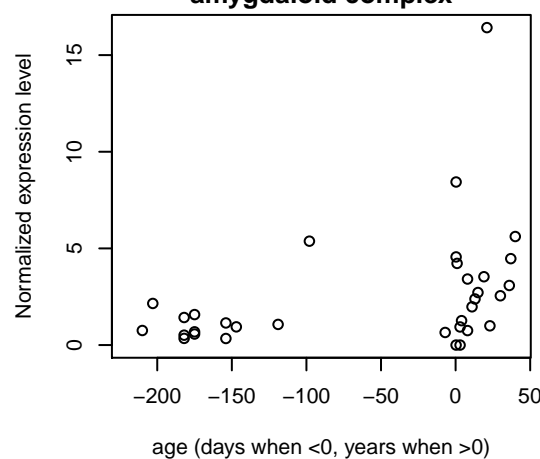

**ZMAT4\_40531882\_40532450**  
(P=0.014, Diff = -0.57)  
amygdaloid complex

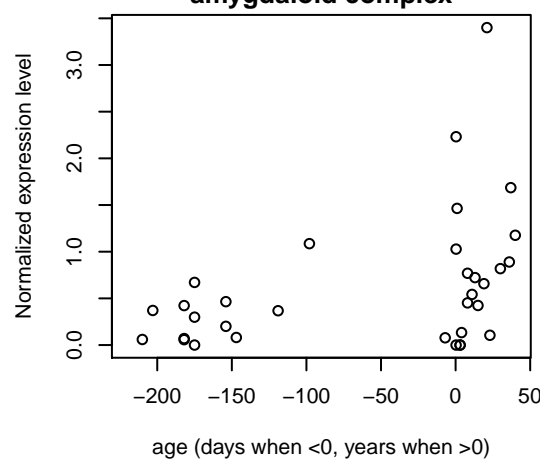

**ZMAT4\_40554514\_40554920**  
(P=0.0744, Diff = -0.36)  
amygdaloid complex

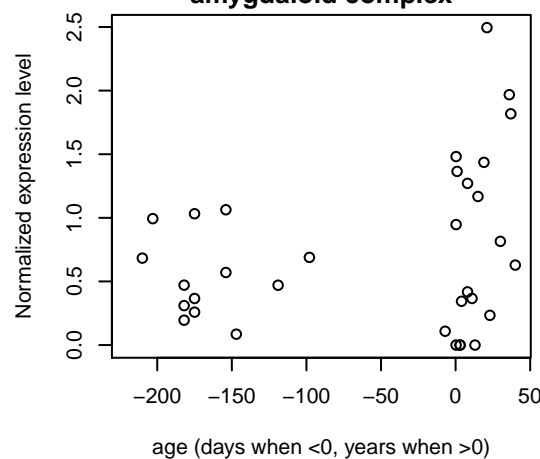

**ZMAT4\_40625159\_40625249**  
(P=0.093, Diff = -0.96)  
amygdaloid complex

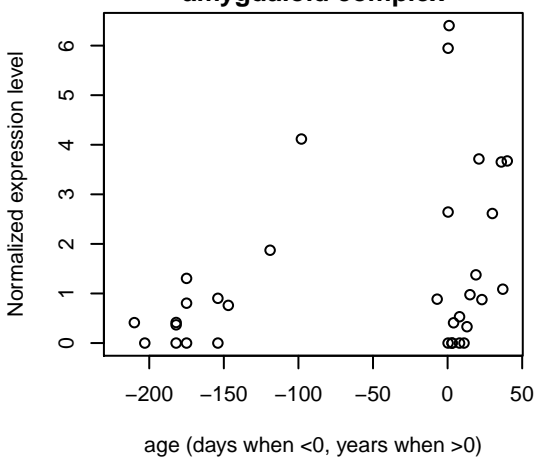

**ZMAT4\_40644207\_40644301**  
(P=0.225, Diff = -0.05)  
amygdaloid complex

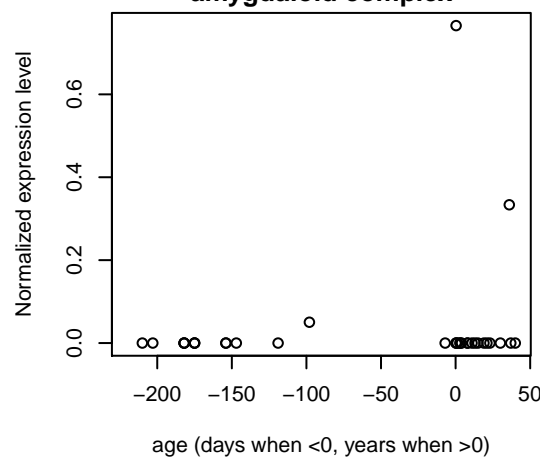

**ZMAT4\_40666027\_40666090**  
(P=0.2169, Diff = 0.06)  
amygdaloid complex

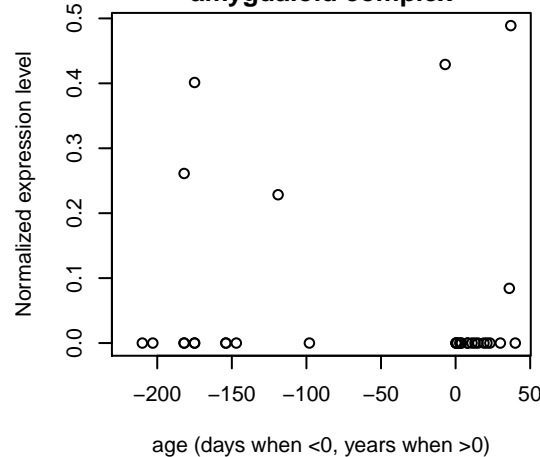

**ZMAT4\_40683093\_40683199**  
(P=0.0252, Diff = -1.15)  
amygdaloid complex

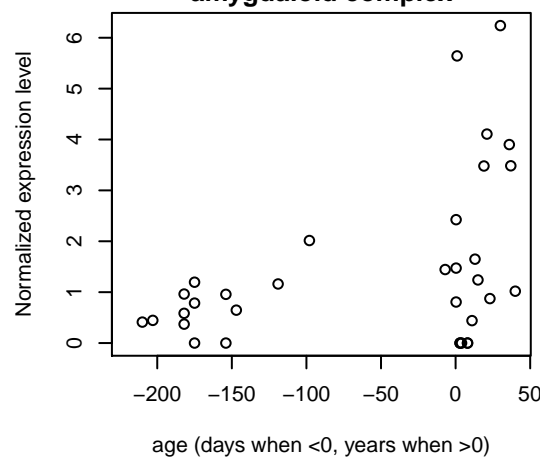

**ZMAT4\_40742047\_40742463**  
(P=0.0037, Diff = -0.15)  
amygdaloid complex

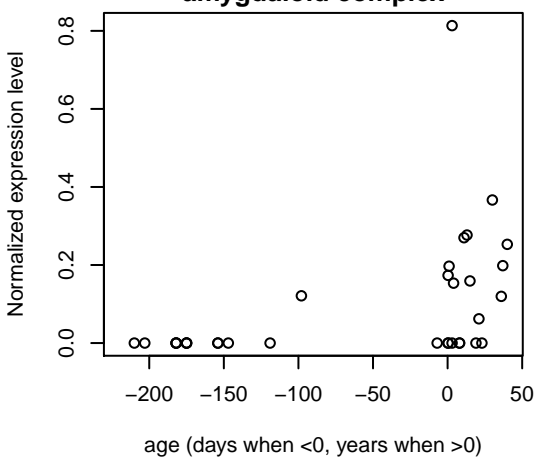

**ZMAT4\_40746013\_40746064**  
(P=NaN, Diff = 0)  
amygdaloid complex



**ZMAT4\_40755201\_40755352**  
(P=0.1323, Diff = -0.3)  
amygdaloid complex

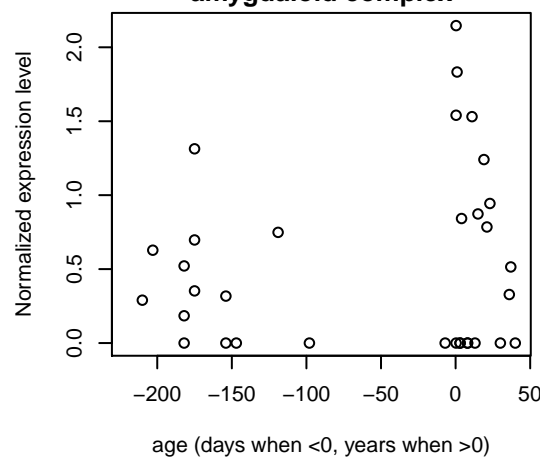

**CNDP1\_72201674\_72201926**  
(P=0, Diff = -9.71)  
amygdaloid complex

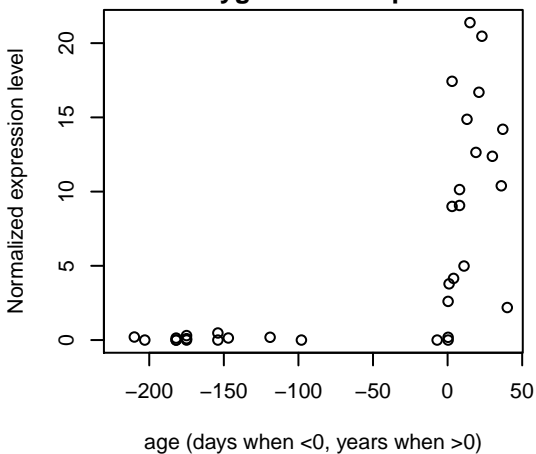

**CNDP1\_72223572\_72223701**  
(P=1e-04, Diff = -20.38)  
amygdaloid complex

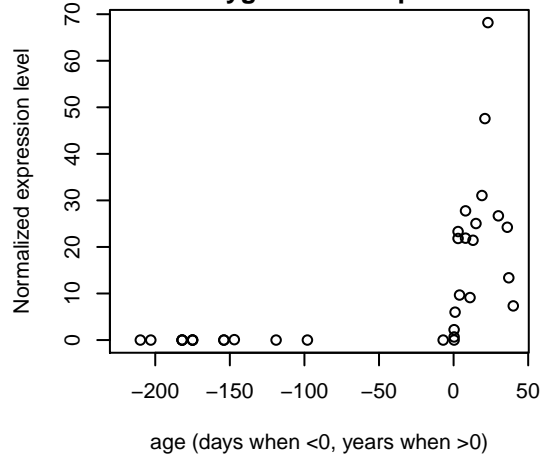

**CNDP1\_72226557\_72226707**  
(P=0, Diff = -22.48)  
amygdaloid complex

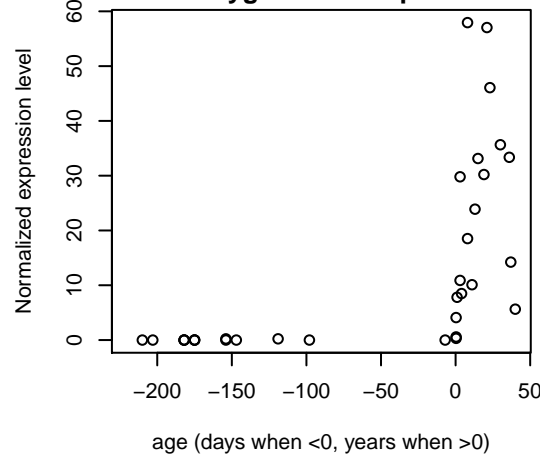

**CNDP1\_72228090\_72228253**  
(P=0, Diff = -31.43)  
amygdaloid complex

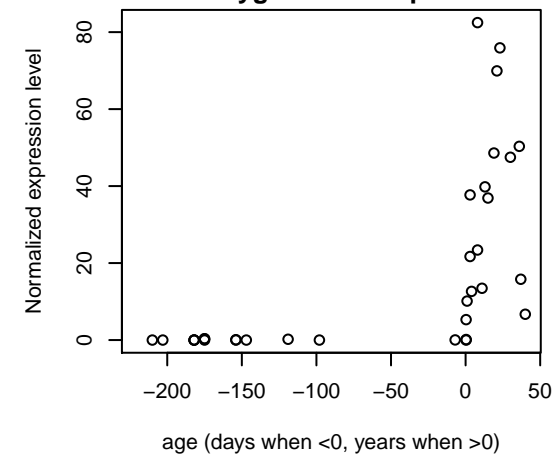

**CNDP1\_72229281\_72229370**  
(P=0, Diff = -45.33)  
amygdaloid complex

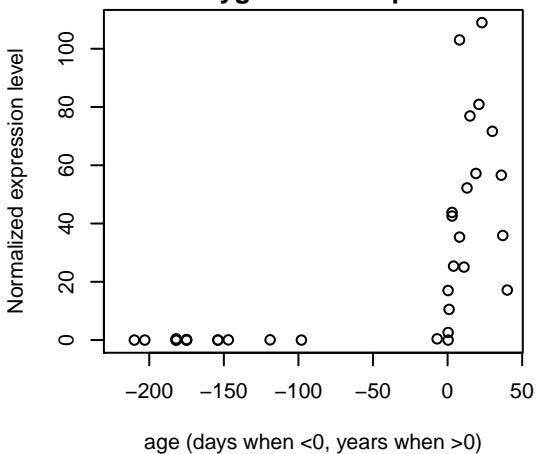

**CNDP1\_72234467\_72234668**  
(P=0, Diff = -50.48)  
amygdaloid complex

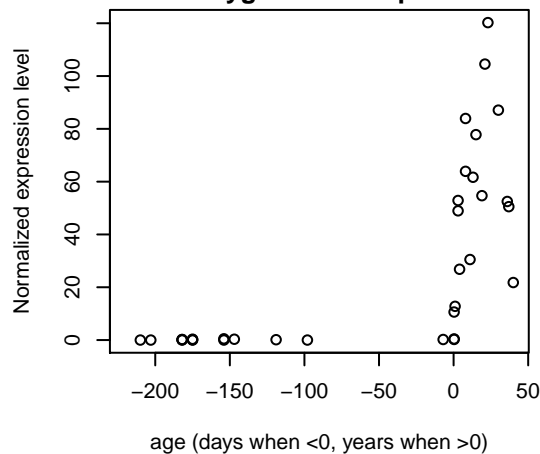

**CNDP1\_72238420\_72238505**  
(P=0, Diff = -51.77)  
amygdaloid complex

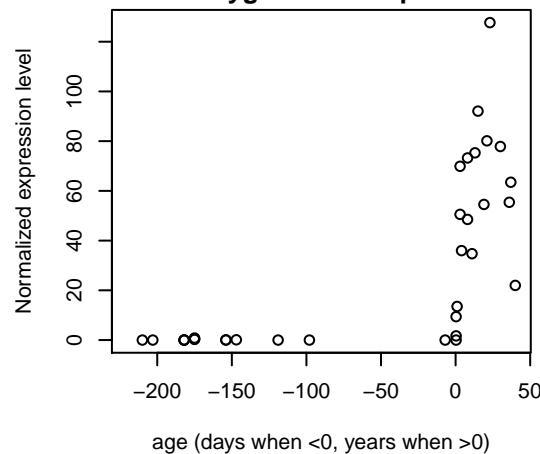

**CNDP1\_72244103\_72244264**  
(P=0, Diff = -38.24)  
amygdaloid complex

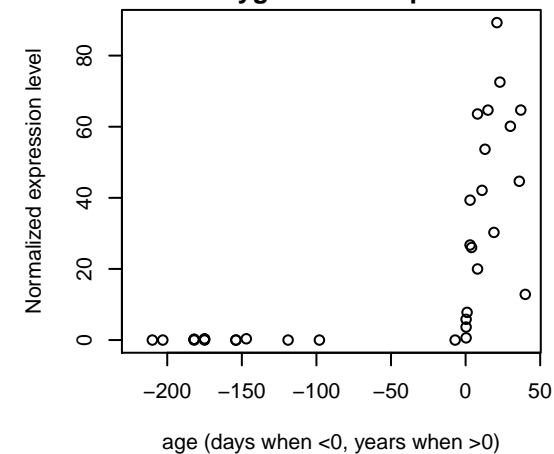

**CNDP1\_72245397\_72245562**  
(P=0, Diff = -49.37)  
amygdaloid complex

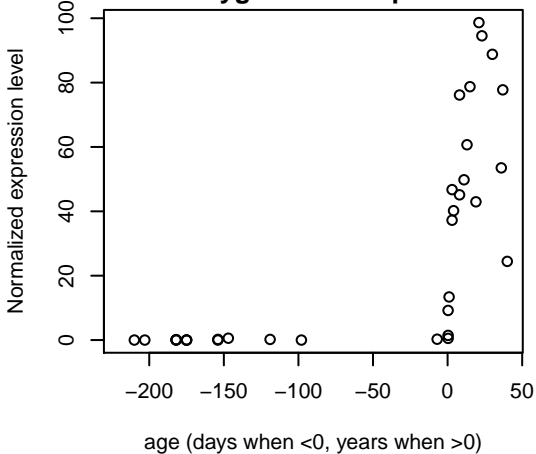

**CNDP1\_72247365\_72247507**  
(P=0, Diff = -65.98)  
amygdaloid complex

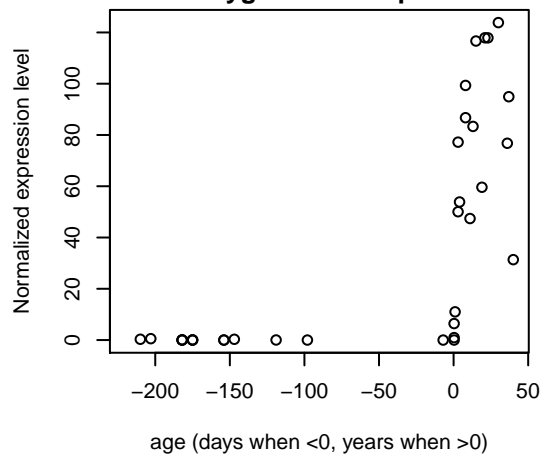

**CNDP1\_72250796\_72250944**  
(P=0, Diff = -64.34)  
amygdaloid complex

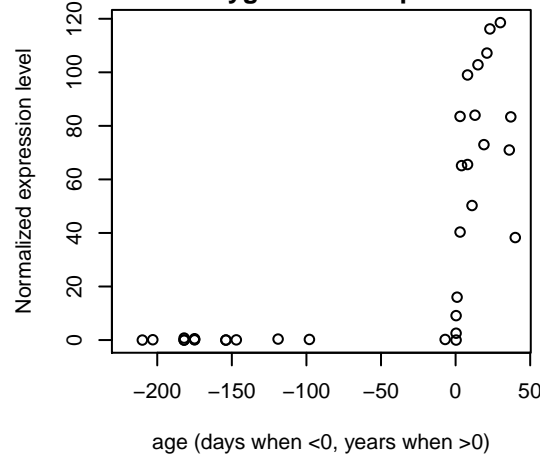

**CNDP1\_72251731\_72252261**  
(P=0, Diff = -40.78)  
amygdaloid complex

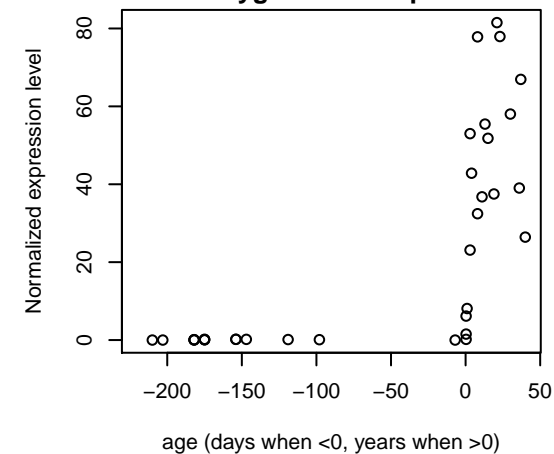

**TOX3\_52471917\_52473880**  
(P=0, Diff = 16.73)  
amygdaloid complex

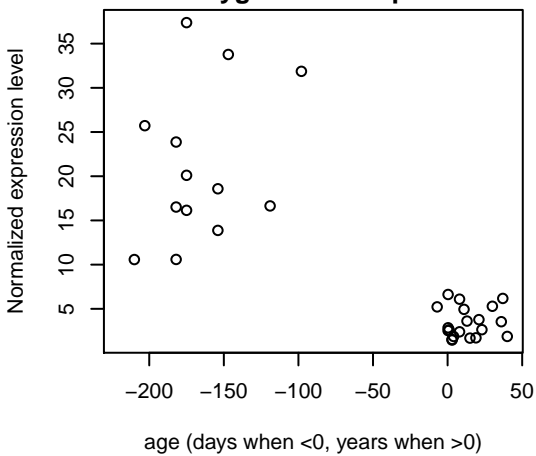

**TOX3\_52478187\_52478268**  
(P=0, Diff = 15.94)  
amygdaloid complex

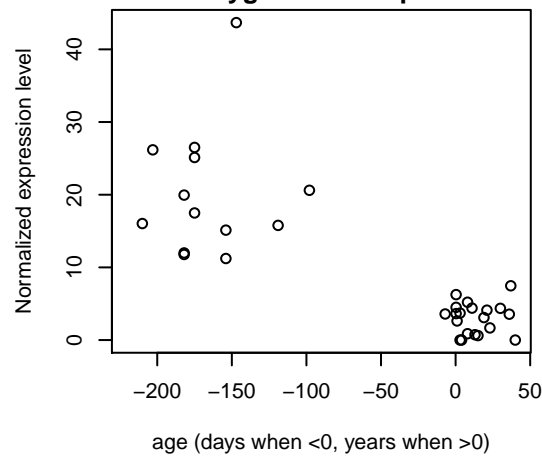

**TOX3\_52479905\_52480133**  
(P=0, Diff = 15.43)  
amygdaloid complex

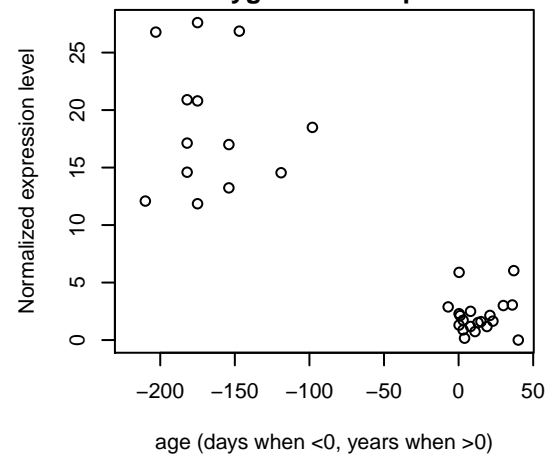

**TOX3\_52484188\_52484458**  
(P=2e-04, Diff = 19.07)  
amygdaloid complex

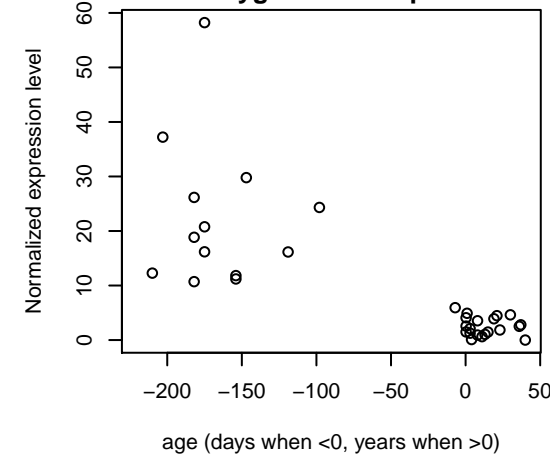

**TOX3\_52497845\_52498100**  
(P=1e-04, Diff = 19.59)  
amygdaloid complex

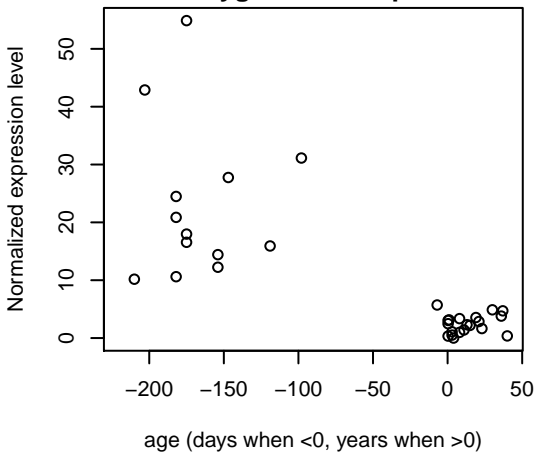

**TOX3\_52502420\_52502486**  
(P=0, Diff = 11.45)  
amygdaloid complex

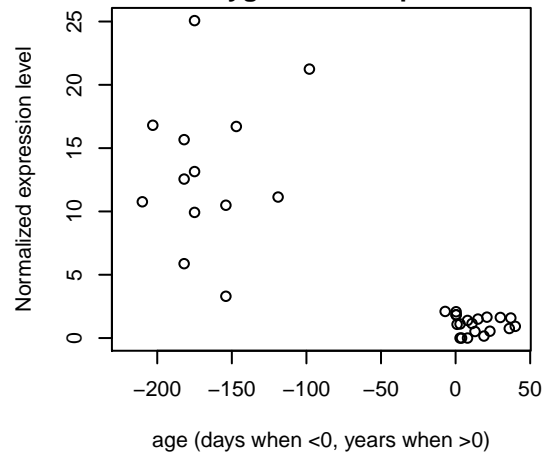

**TOX3\_52553317\_52553491**  
(P=0.0306, Diff = 0.22)  
amygdaloid complex

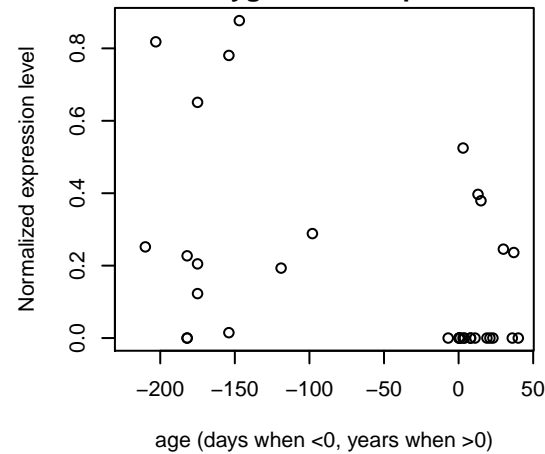

**TOX3\_52580548\_52580806**  
(P=0.0014, Diff = 4.69)  
amygdaloid complex

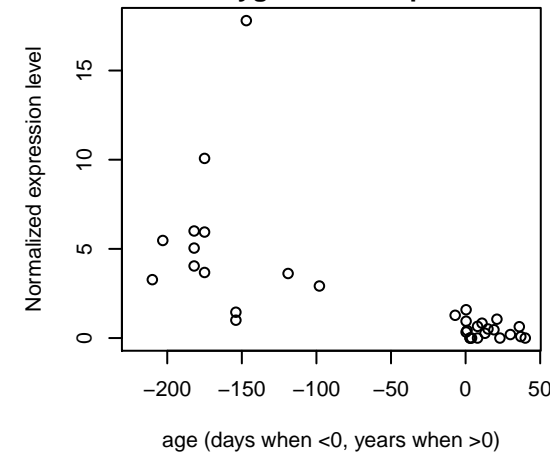

**TOX3\_52581625\_52581714**  
(P=0.1081, Diff = 0.11)  
amygdaloid complex

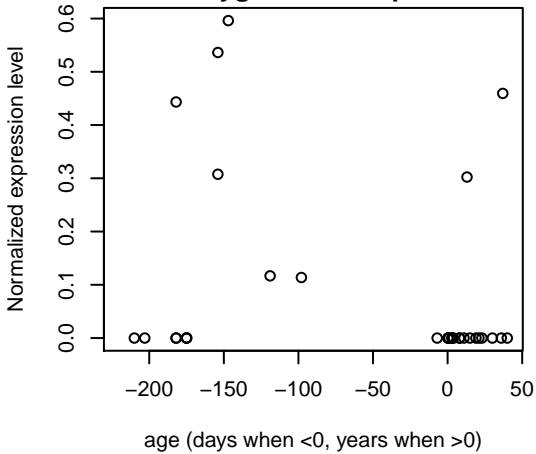

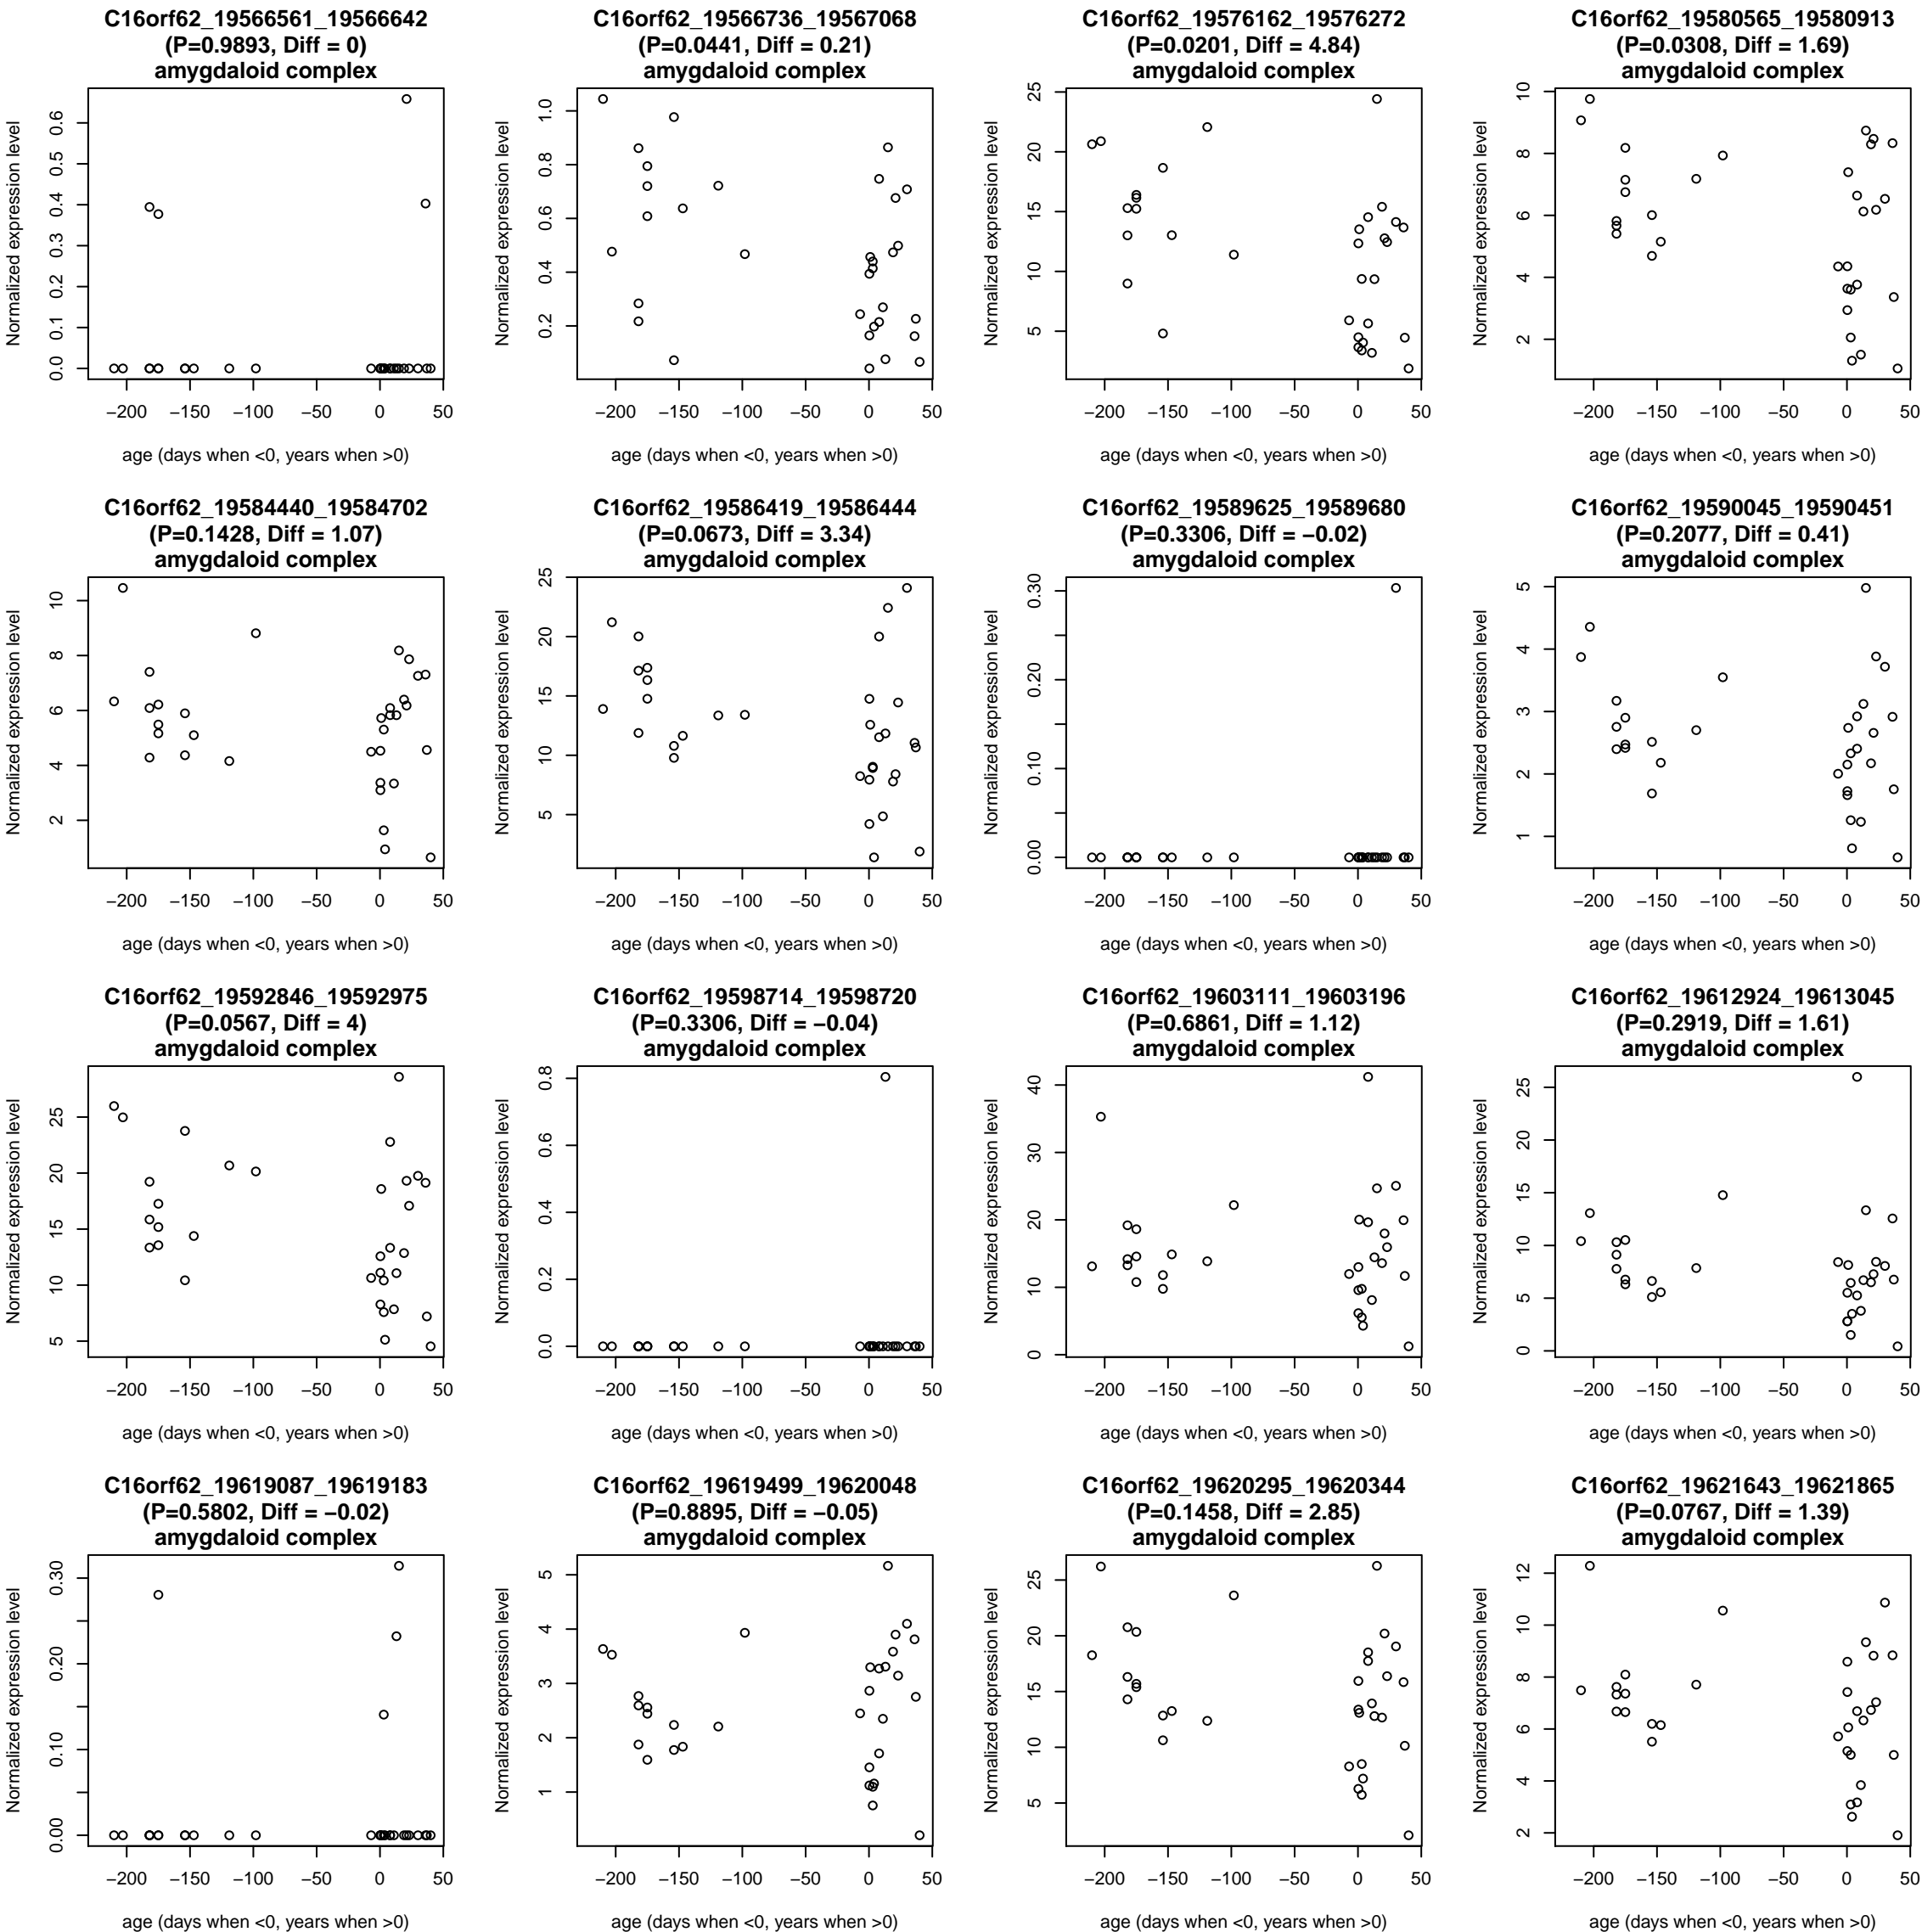

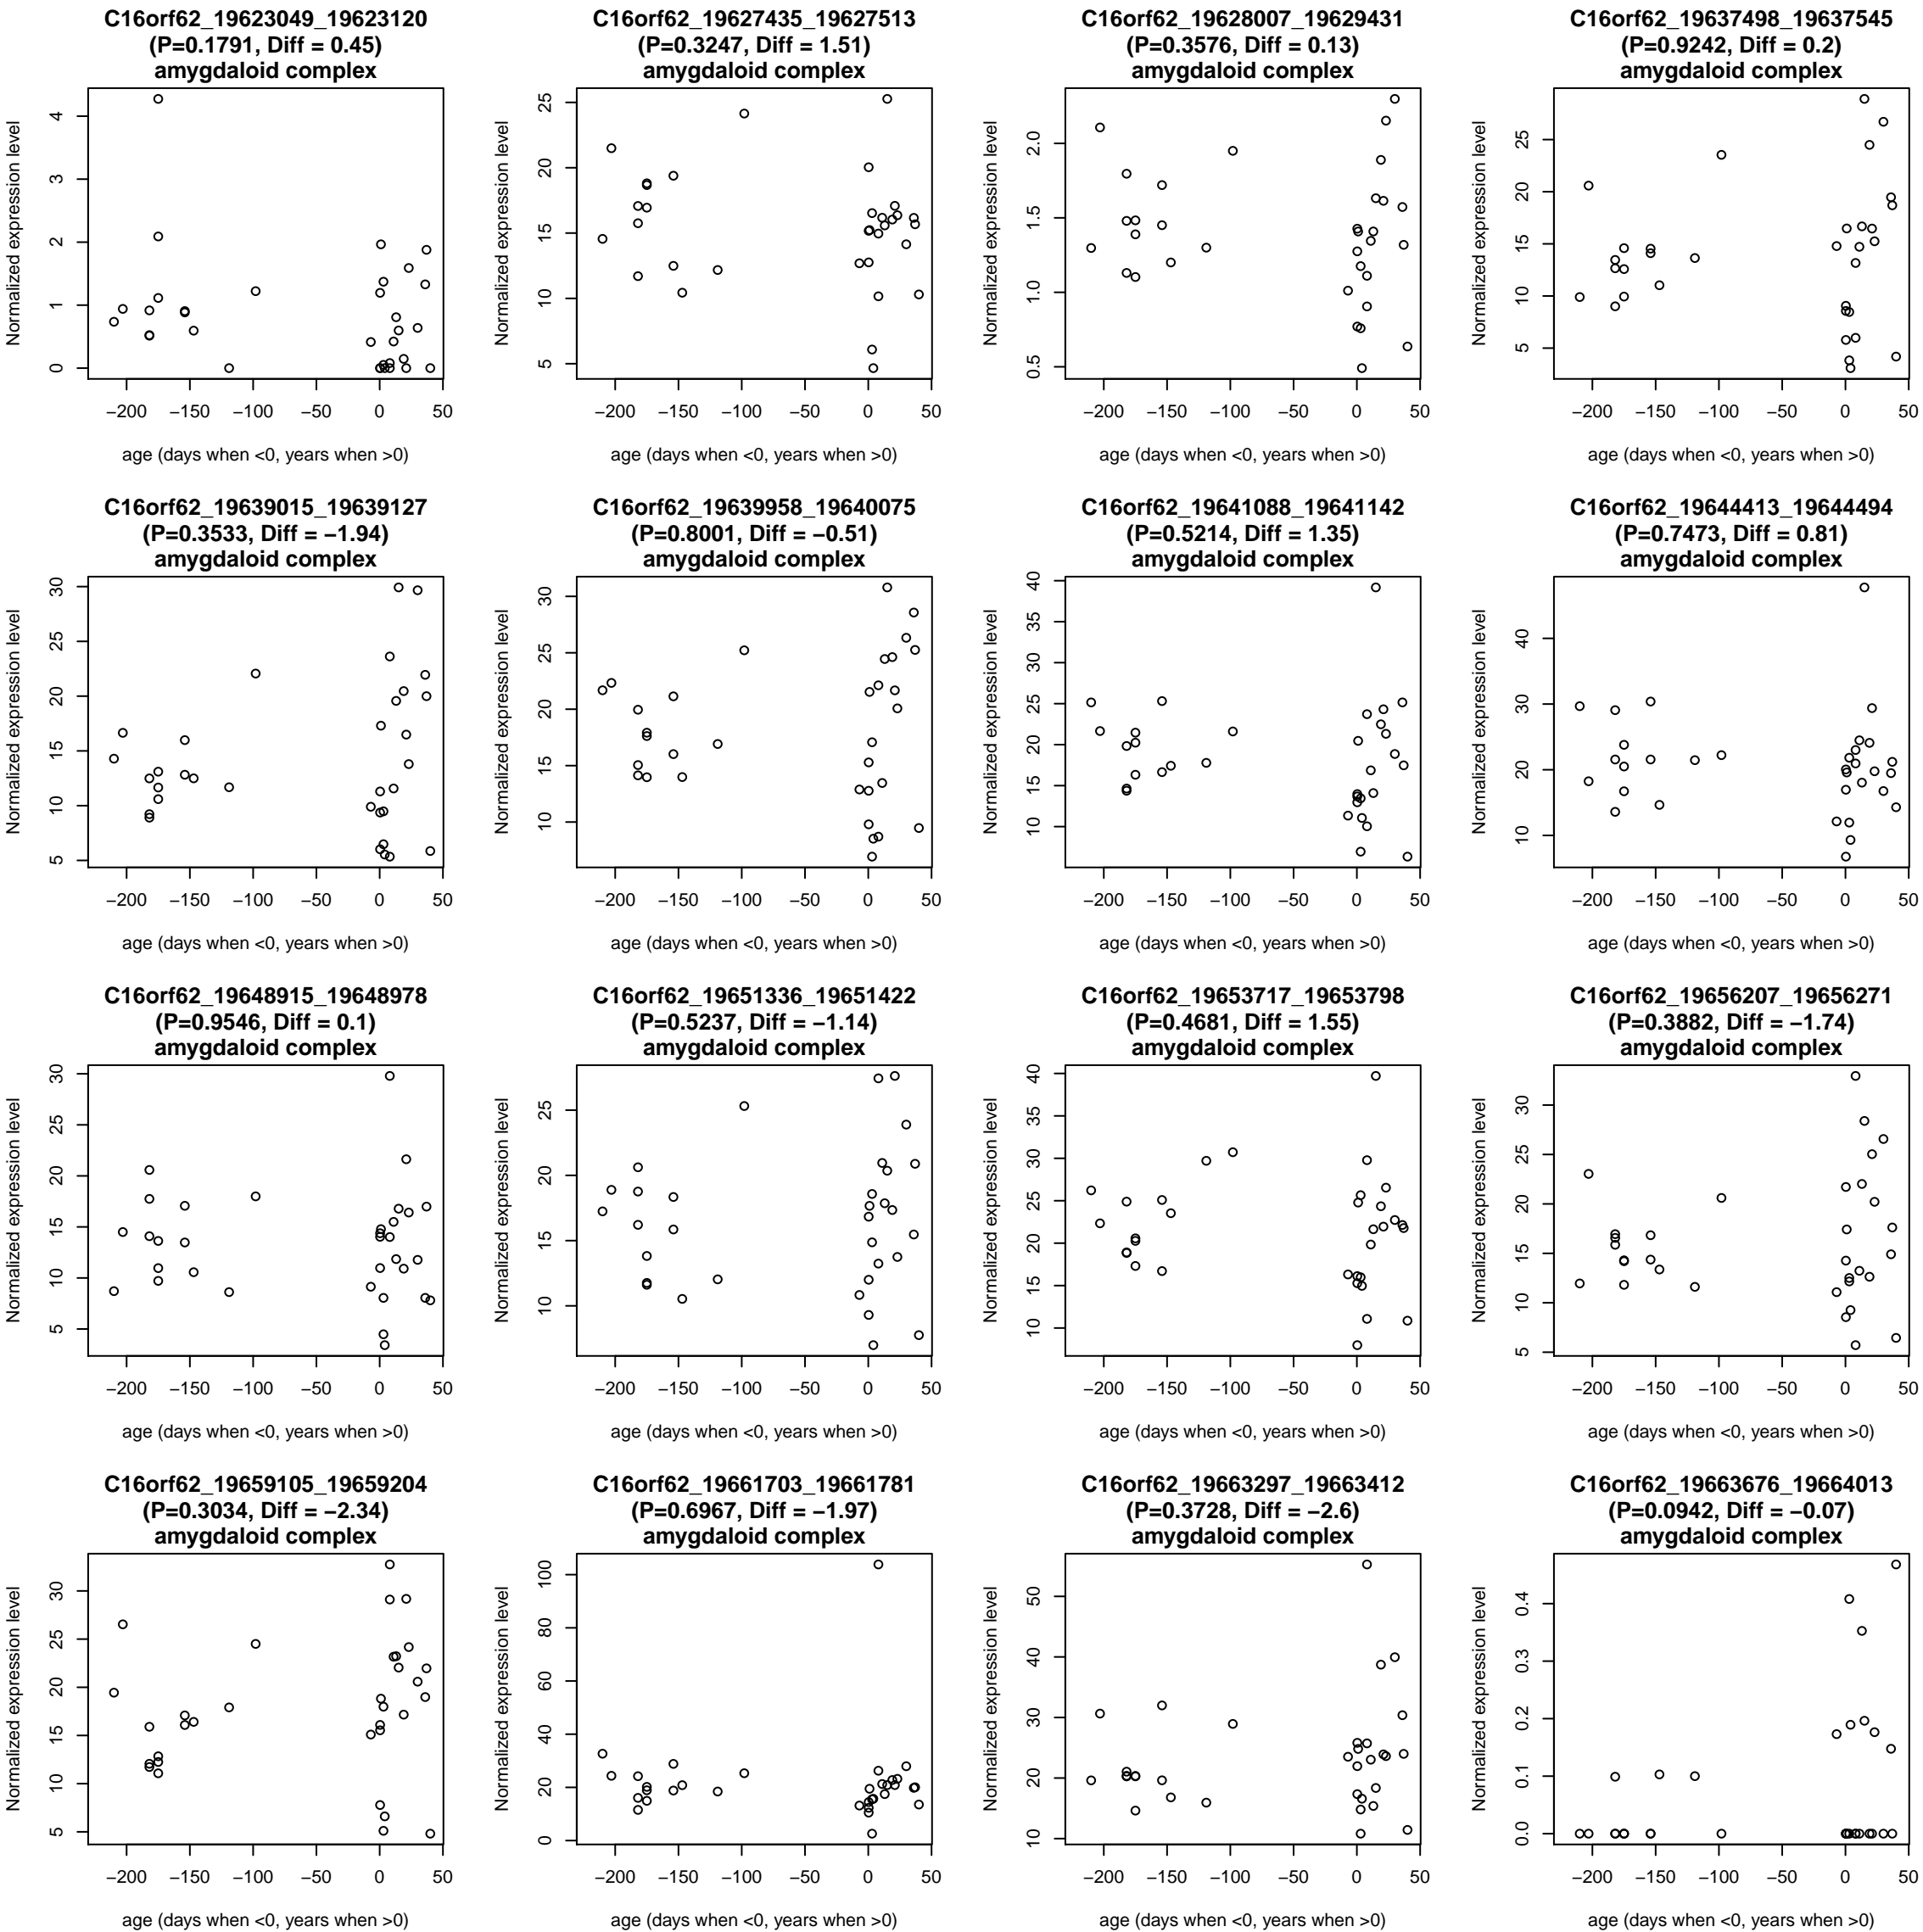

**C16orf62\_19680481\_19680621**  
(P=0.2266, Diff = -2.71)  
amygdaloid complex

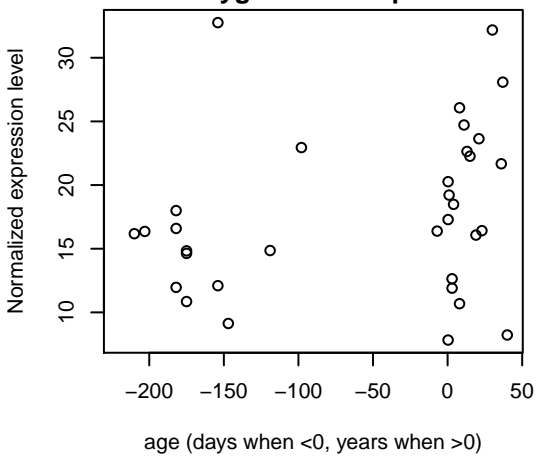

**C16orf62\_19693546\_19693712**  
(P=0.1808, Diff = -3.25)  
amygdaloid complex

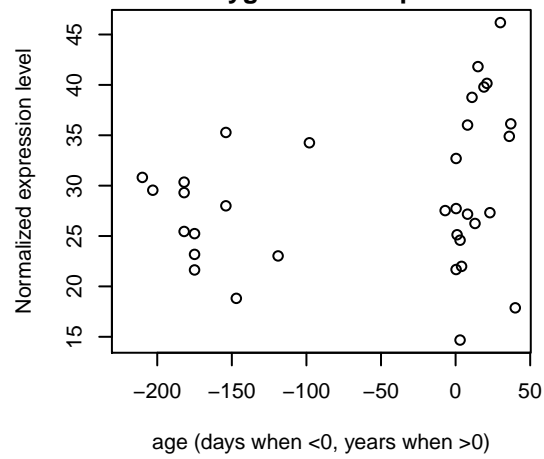

**C16orf62\_19702674\_19702793**  
(P=0.0301, Diff = -6.48)  
amygdaloid complex

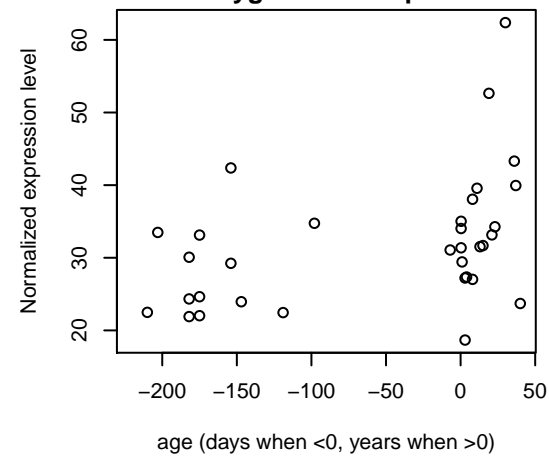

**C16orf62\_19710823\_19710970**  
(P=0.1032, Diff = -5.28)  
amygdaloid complex

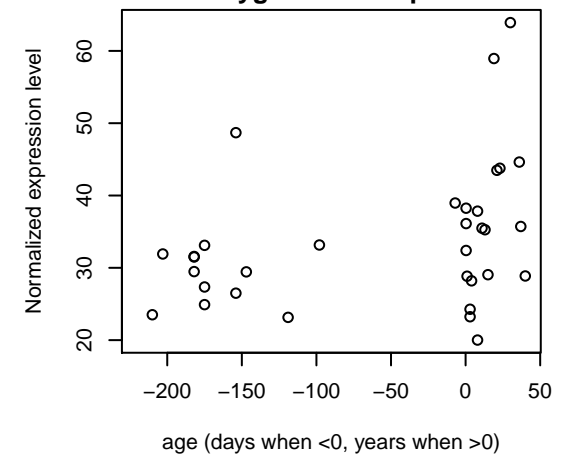

**C16orf62\_19711699\_19712448**  
(P=0.0042, Diff = -3.66)  
amygdaloid complex

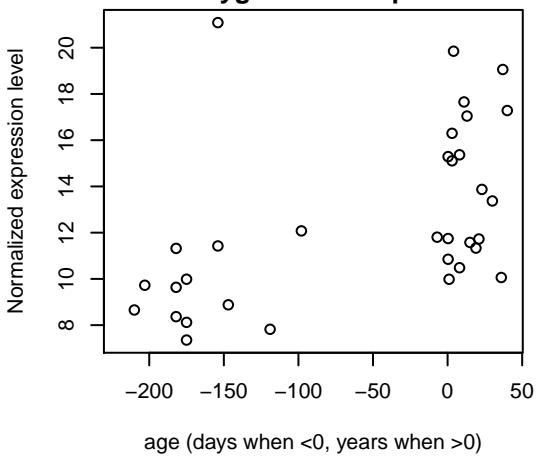

**C16orf62\_19716437\_19716880**  
(P=0.0576, Diff = 0.85)  
amygdaloid complex

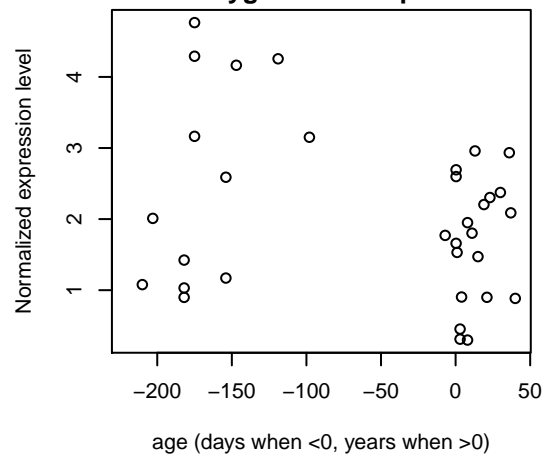

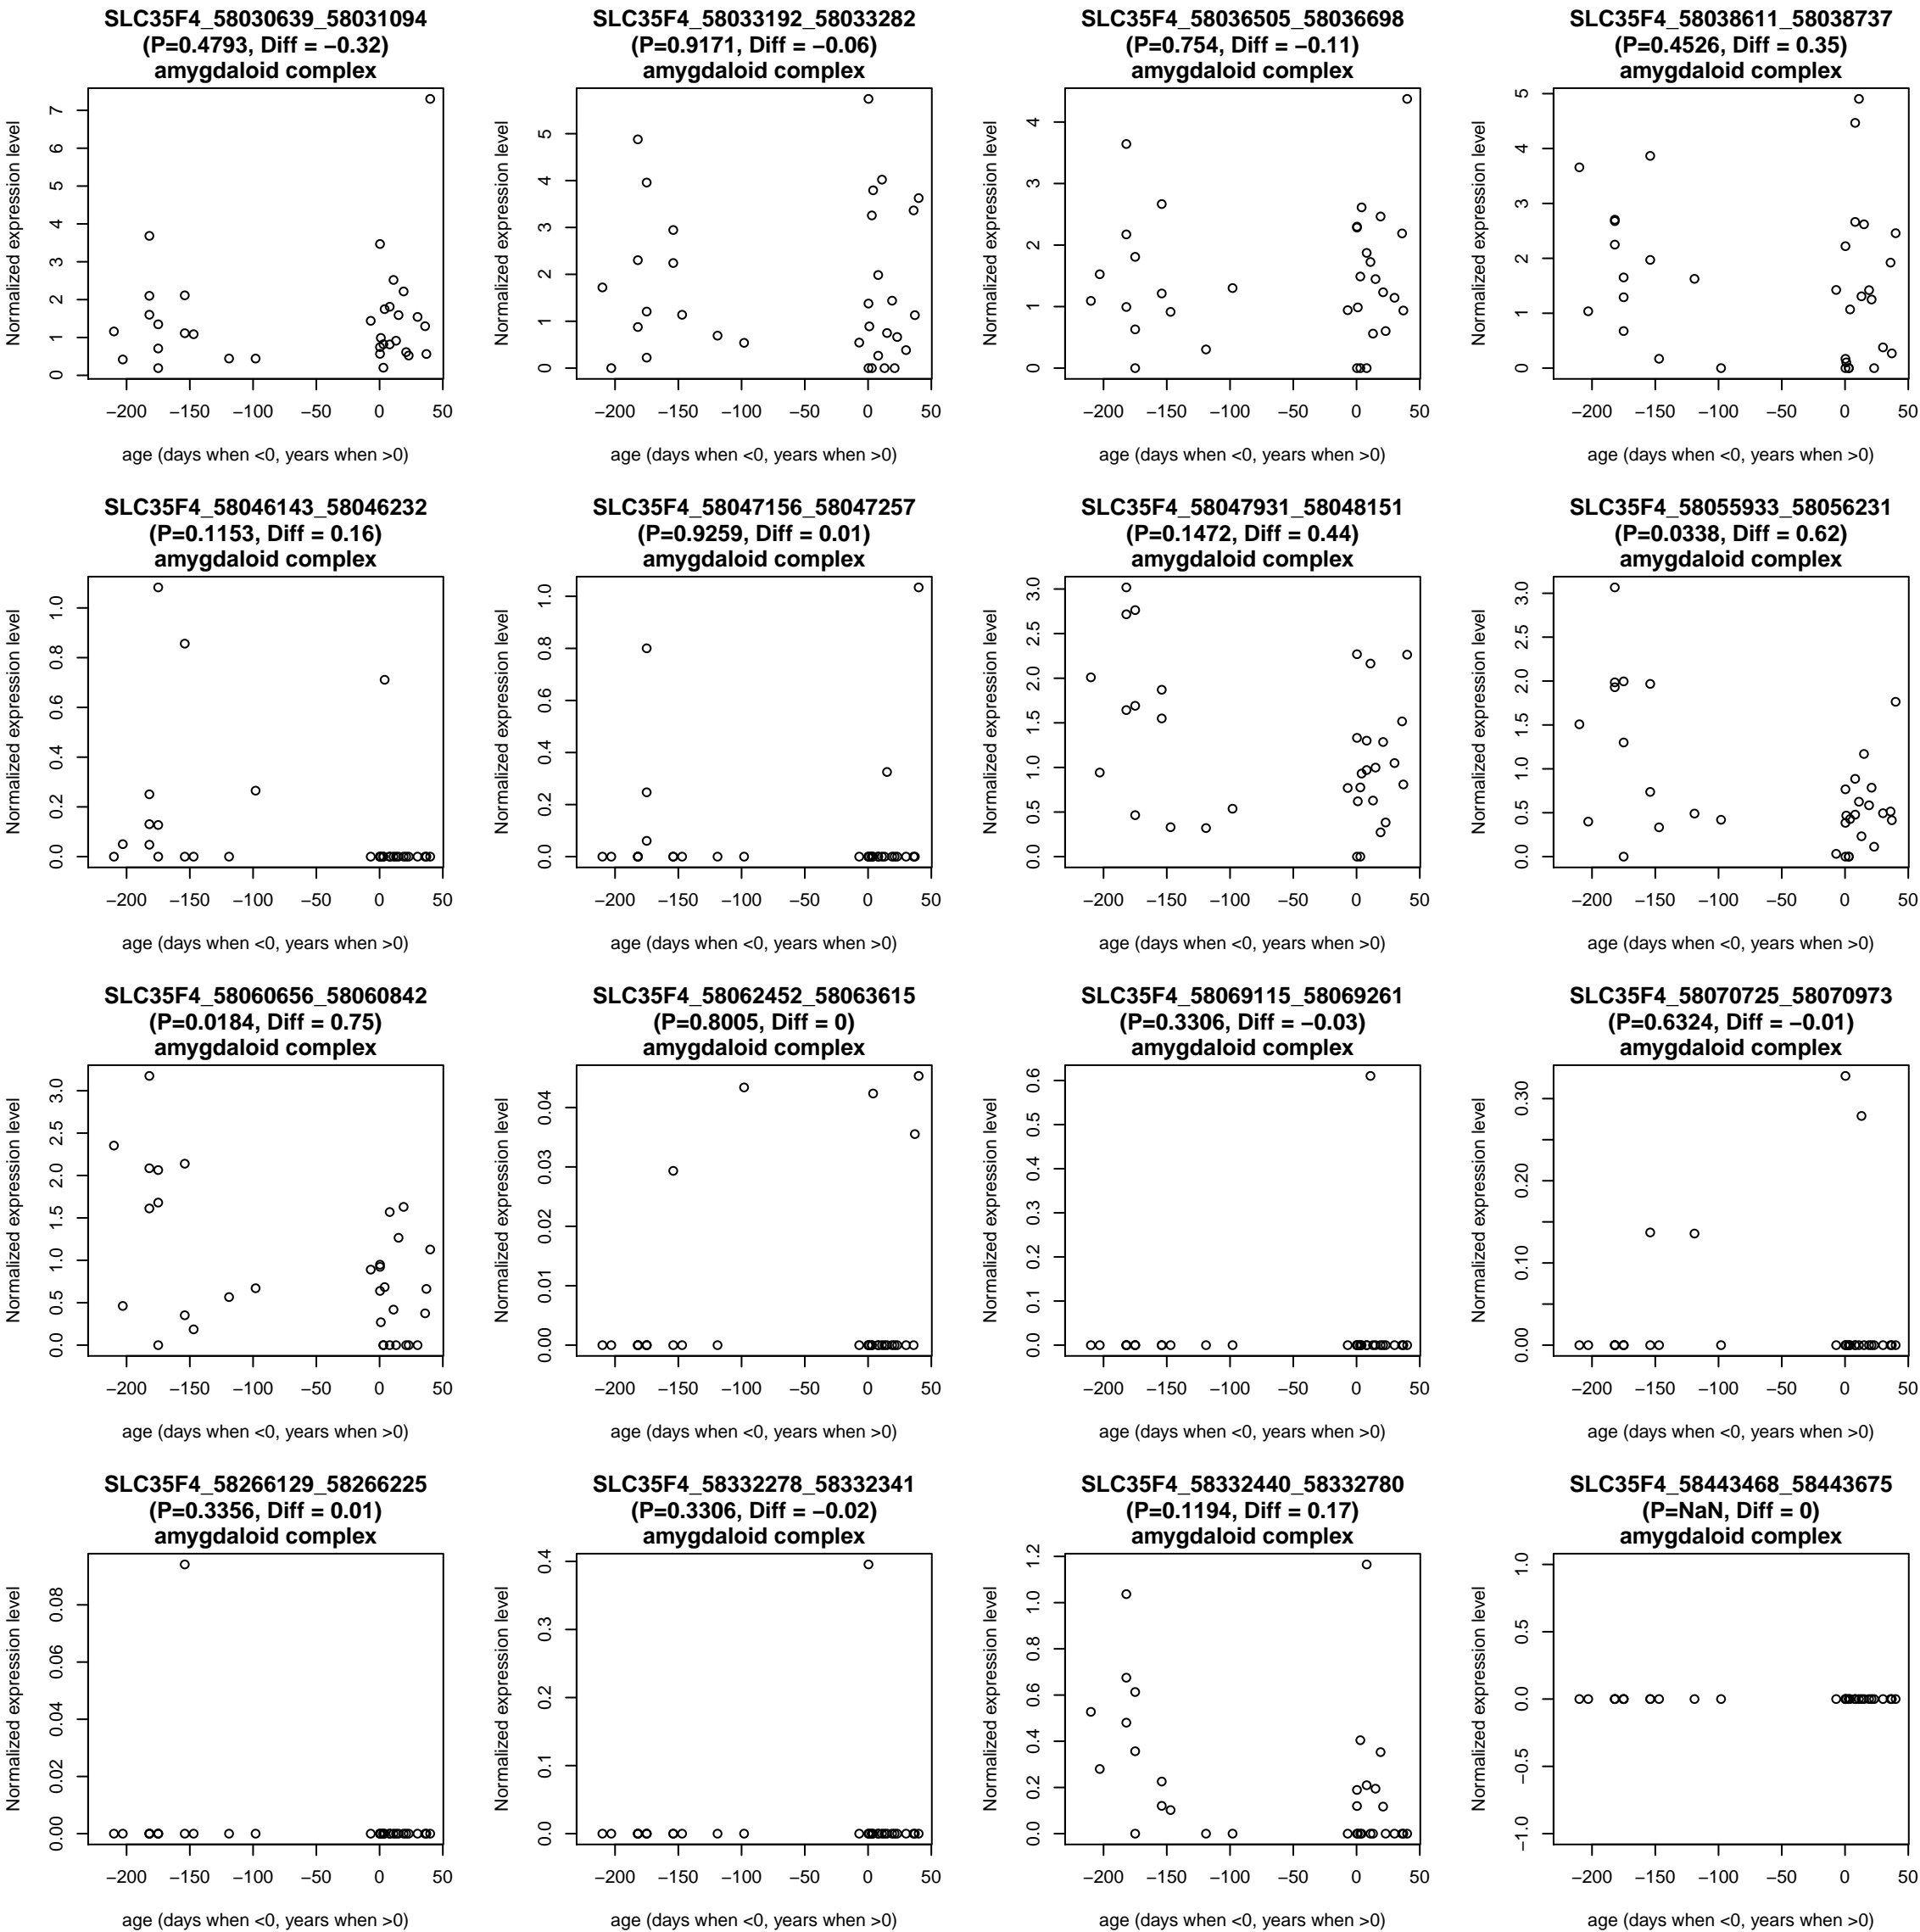

SLC35F4\_58448630\_58448912  
(P=NaN, Diff = 0)  
amygdaloid complex

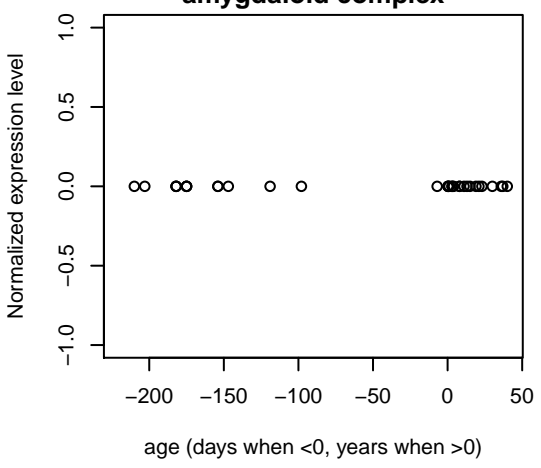



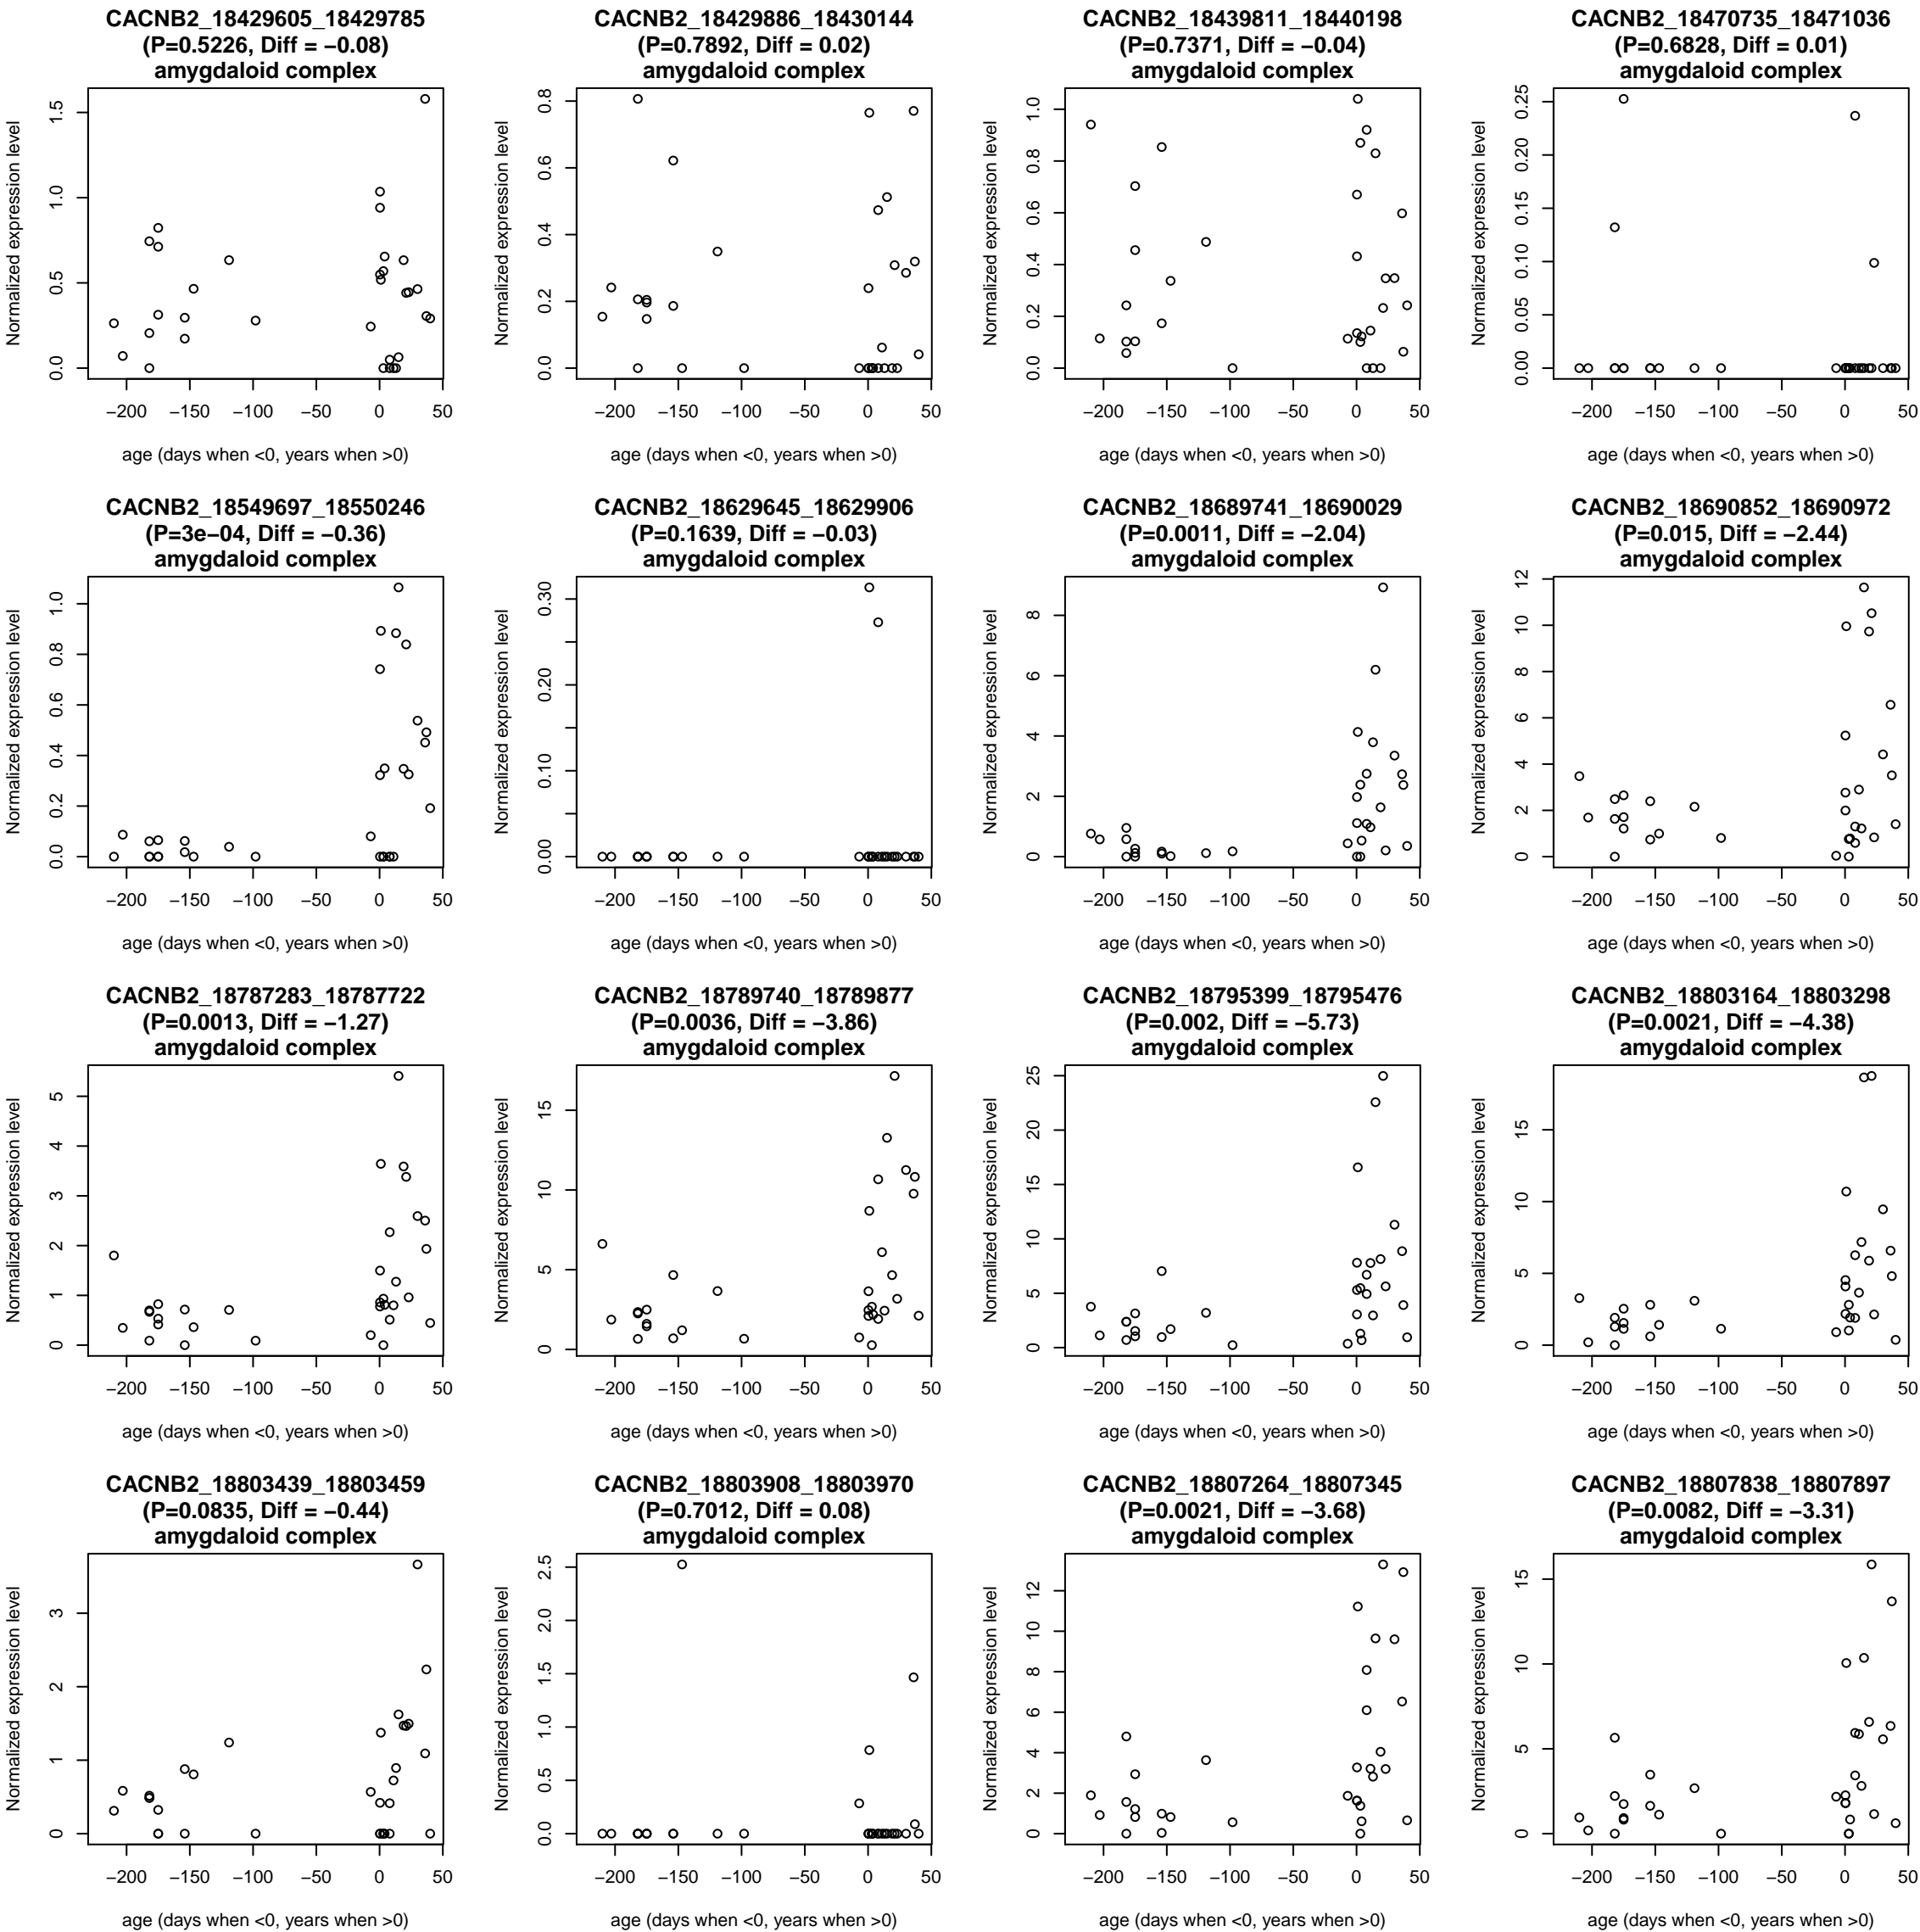

**CACNB2\_18816516\_18816626**  
(P=0.0012, Diff = -5.62)  
amygdaloid complex

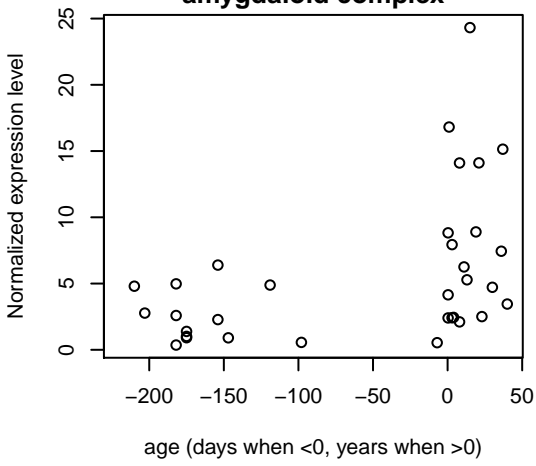

**CACNB2\_18823004\_18823156**  
(P=0.0034, Diff = -3.77)  
amygdaloid complex

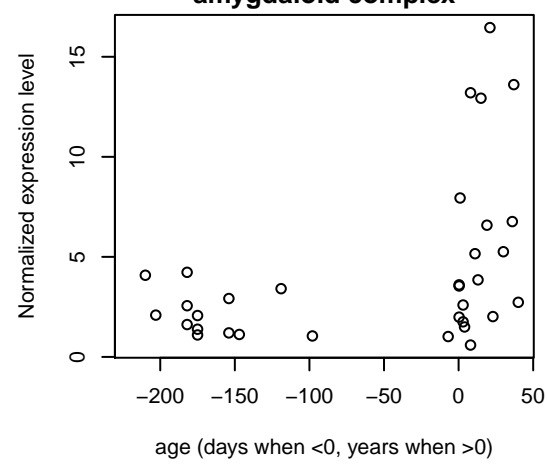

**CACNB2\_18825029\_18825125**  
(P=6e-04, Diff = -5.67)  
amygdaloid complex

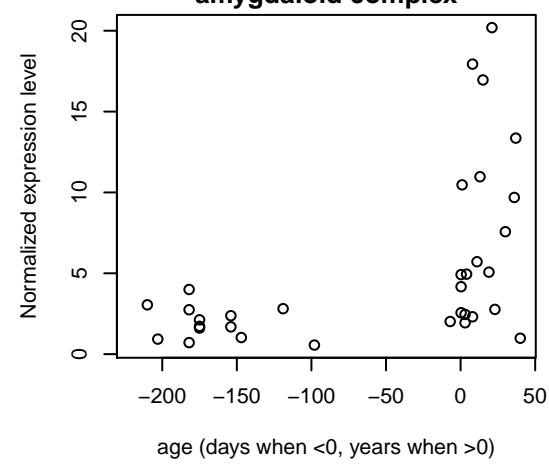

**CACNB2\_18827108\_18827294**  
(P=0, Diff = -7.07)  
amygdaloid complex

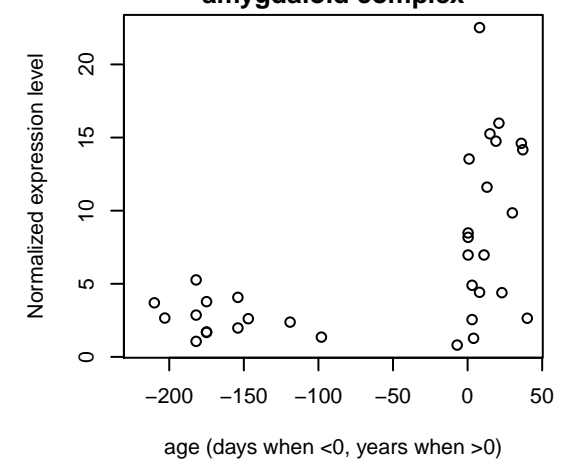

**CACNB2\_18828158\_18830798**  
(P=0, Diff = -6.07)  
amygdaloid complex

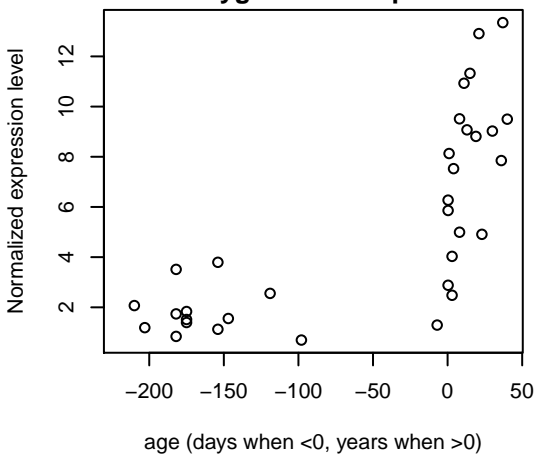

**CTH\_70876900\_70877266**  
(P=0.0178, Diff = 1.39)  
amygdaloid complex

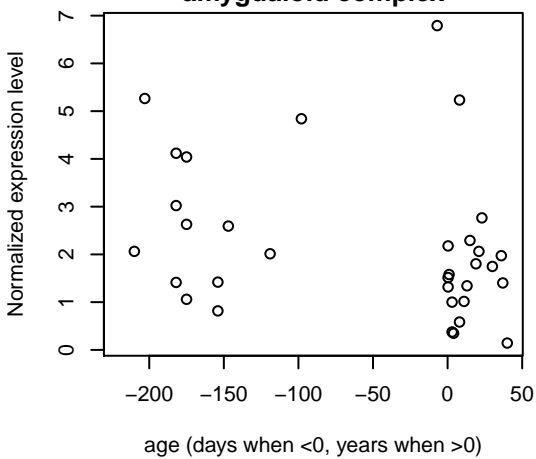

**CTH\_70881638\_70881720**  
(P=0.0161, Diff = 1.59)  
amygdaloid complex

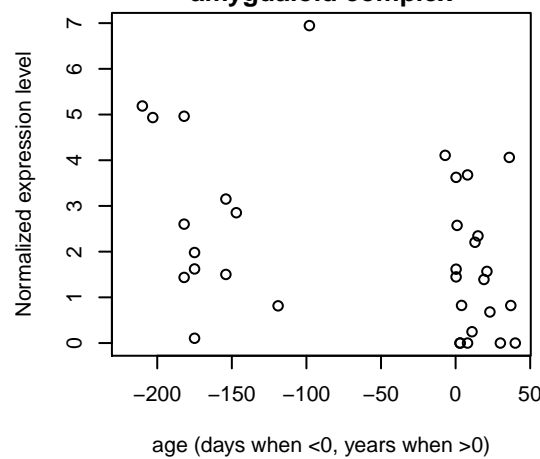

**CTH\_70883619\_70883715**  
(P=0.021, Diff = 1.05)  
amygdaloid complex

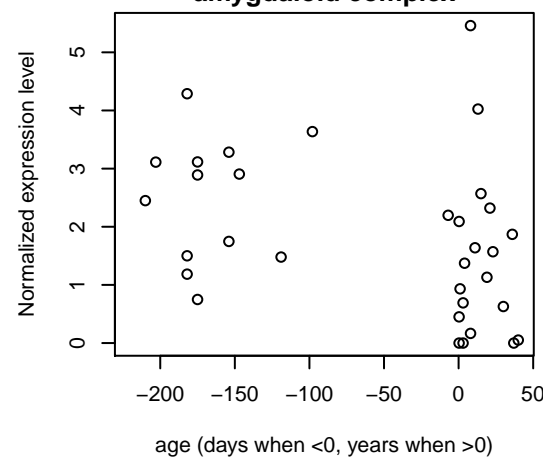

**CTH\_70887248\_70887358**  
(P=2e-04, Diff = 1.98)  
amygdaloid complex

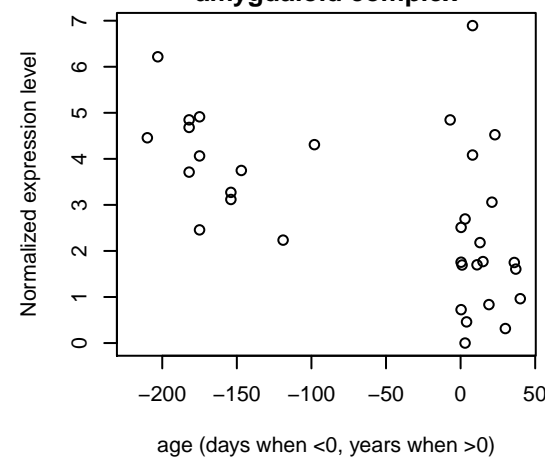

**CTH\_70889967\_70890099**  
(P=0, Diff = 2.43)  
amygdaloid complex

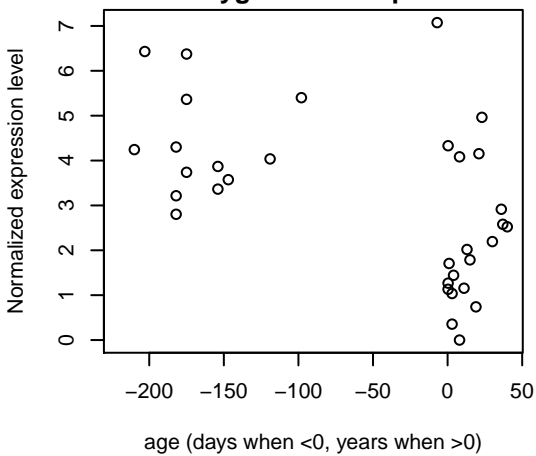

**CTH\_70895476\_70895534**  
(P=0.0102, Diff = 1.7)  
amygdaloid complex

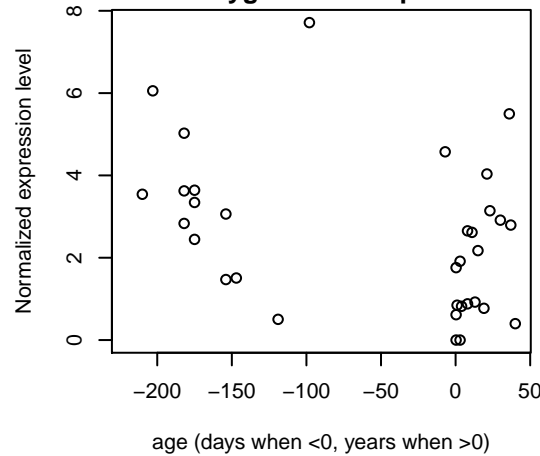

**CTH\_70895999\_70896077**  
(P=0.0093, Diff = 1.36)  
amygdaloid complex

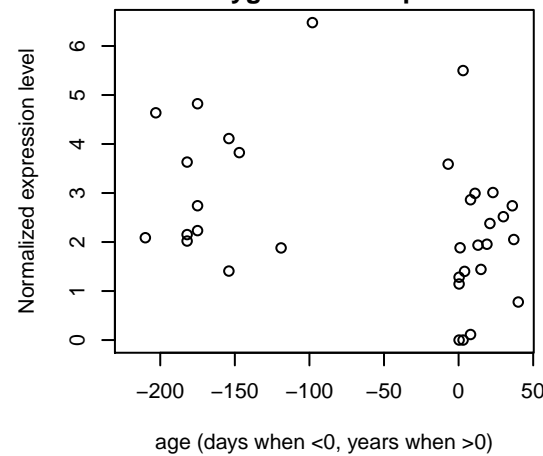

**CTH\_70897765\_70897918**  
(P=0.0973, Diff = 1.1)  
amygdaloid complex

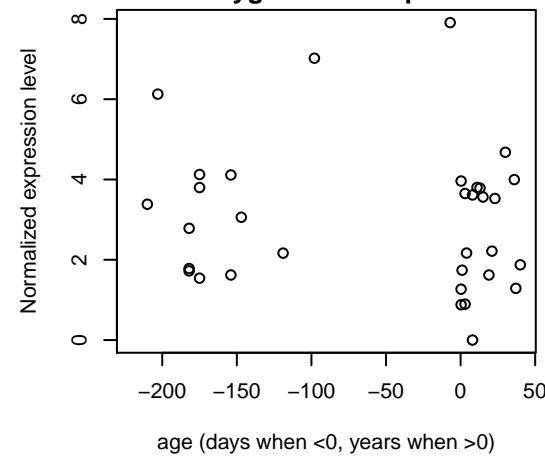

**CTH\_70899510\_70899632**  
(P=0.074, Diff = 1.37)  
amygdaloid complex

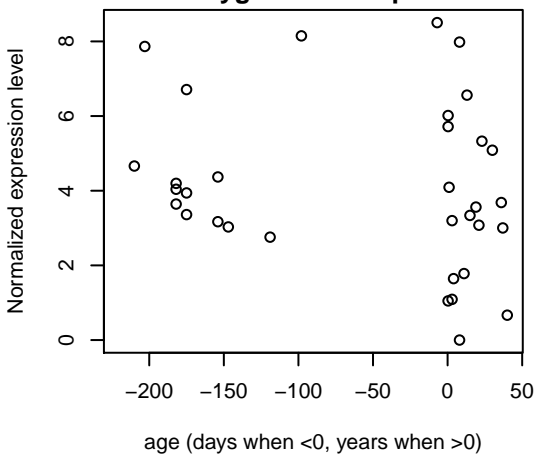

**CTH\_70900533\_70900860**  
(P=0.3233, Diff = 0.17)  
amygdaloid complex

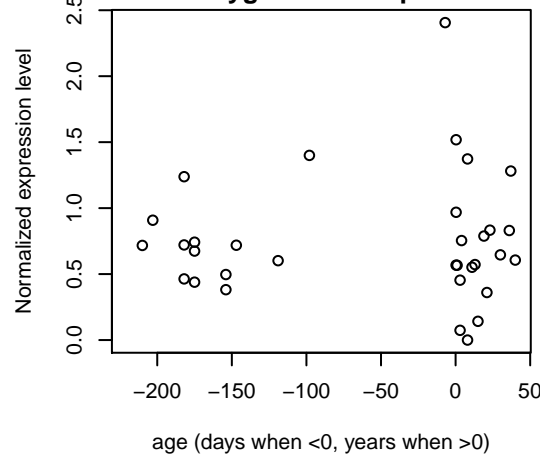

**CTH\_70904370\_70904509**  
(P=0.0864, Diff = 2.33)  
amygdaloid complex

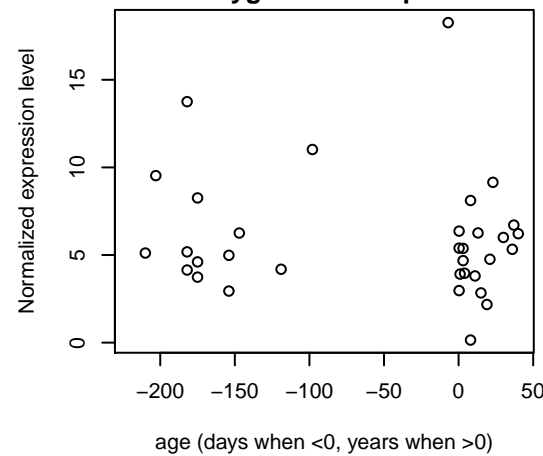

**CTH\_70904783\_70905534**  
(P=0.4744, Diff = 0.18)  
amygdaloid complex

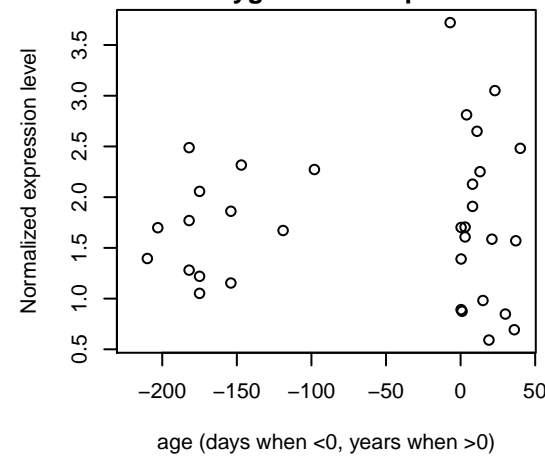

**SEC14L5\_5008317\_5008446**  
(P=0.0083, Diff = -0.92)  
amygdaloid complex

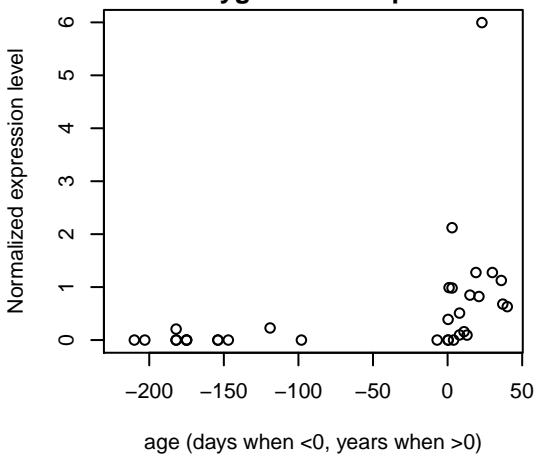

**SEC14L5\_5009273\_5009387**  
(P=5e-04, Diff = -4.05)  
amygdaloid complex

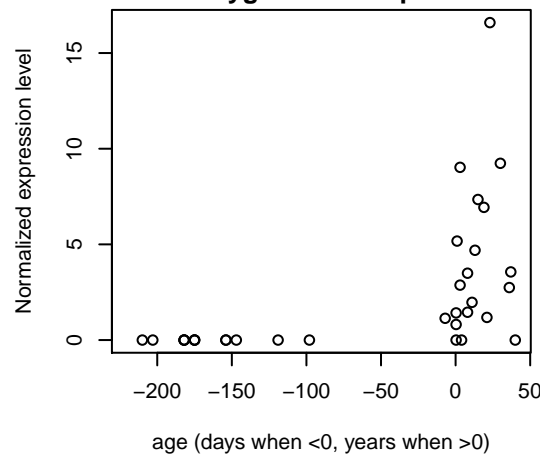

**SEC14L5\_5037557\_5037707**  
(P=1e-04, Diff = -1.7)  
amygdaloid complex

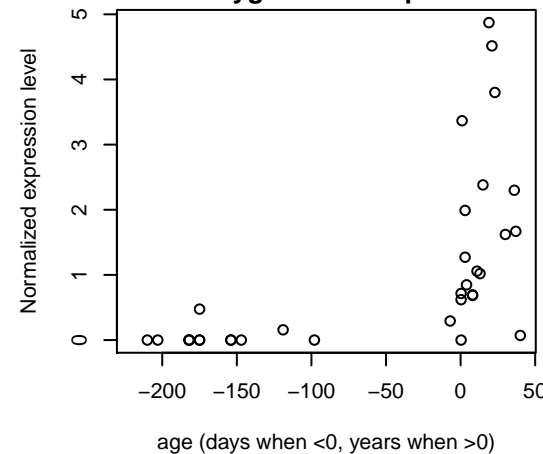

**SEC14L5\_5038149\_5038281**  
(P=3e-04, Diff = -5.27)  
amygdaloid complex

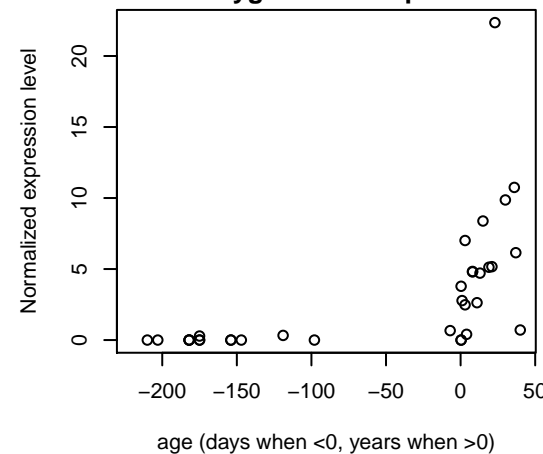

**SEC14L5\_5040767\_5040896**  
(P=3e-04, Diff = -5.48)  
amygdaloid complex

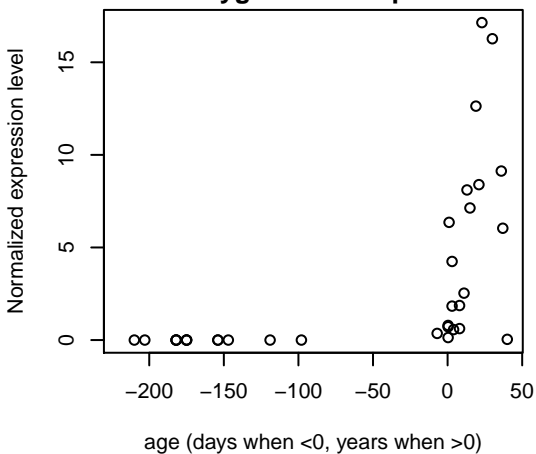

**SEC14L5\_5041838\_5042031**  
(P=2e-04, Diff = -4.3)  
amygdaloid complex

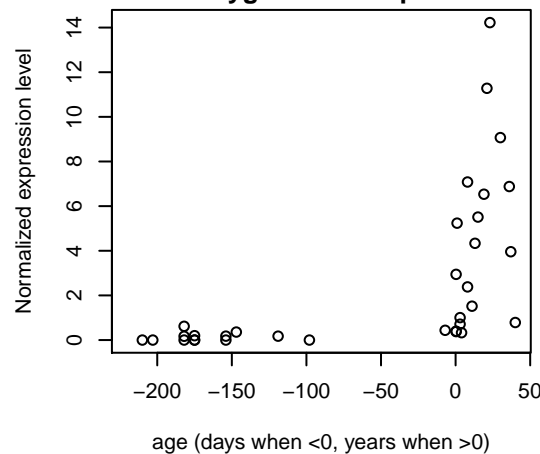

**SEC14L5\_5046348\_5046461**  
(P=1e-04, Diff = -3.61)  
amygdaloid complex

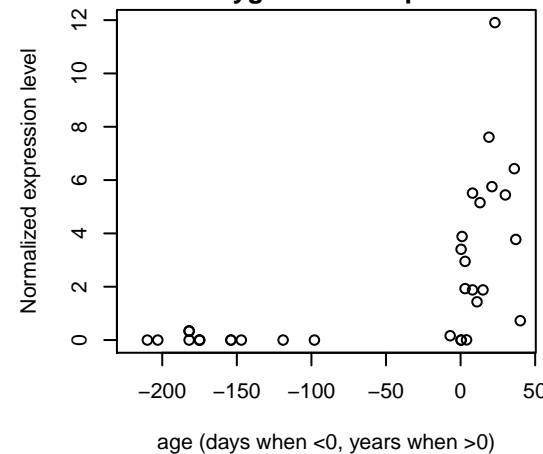

**SEC14L5\_5046855\_5047045**  
(P=1e-04, Diff = -5.39)  
amygdaloid complex

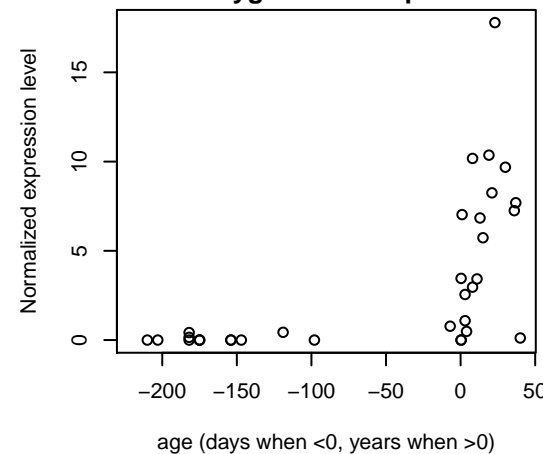

**SEC14L5\_5050655\_5050744**  
(P=0, Diff = -4.23)  
amygdaloid complex

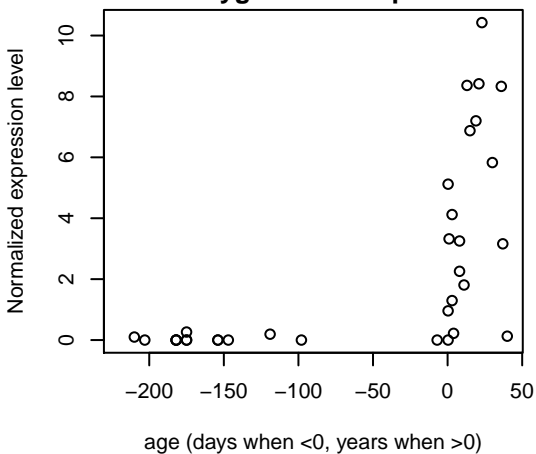

**SEC14L5\_5050855\_5050926**  
(P=2e-04, Diff = -5.17)  
amygdaloid complex

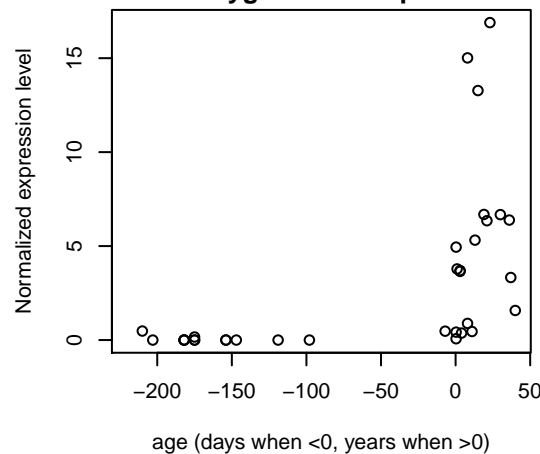

**SEC14L5\_5053402\_5053574**  
(P=0.0012, Diff = -4.46)  
amygdaloid complex

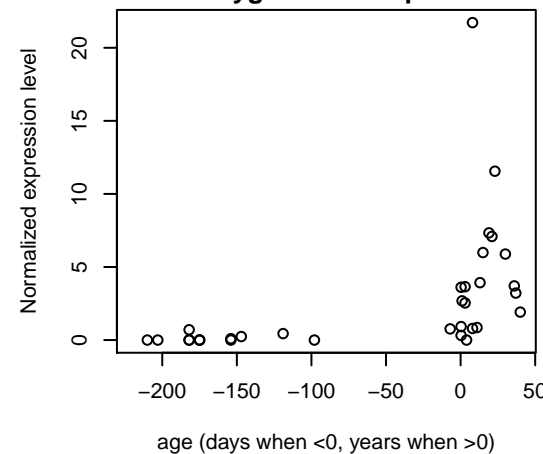

**SEC14L5\_5055914\_5056049**  
(P=3e-04, Diff = -4.76)  
amygdaloid complex

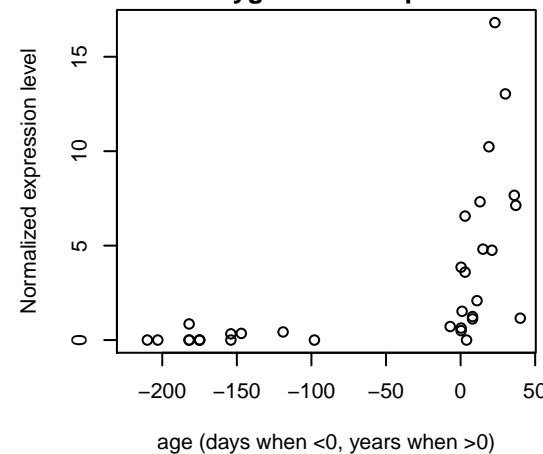

**SEC14L5\_5057352\_5057487**  
(P=2e-04, Diff = -5.1)  
amygdaloid complex

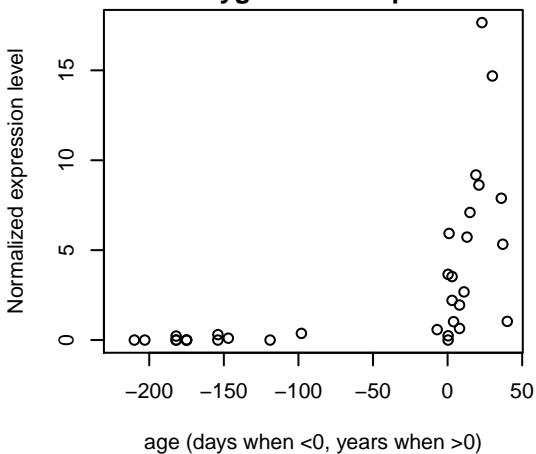

**SEC14L5\_5058421\_5058649**  
(P=0, Diff = -3.07)  
amygdaloid complex

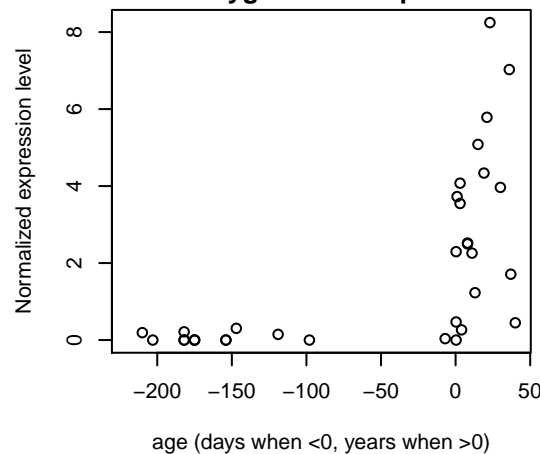

**SEC14L5\_5061095\_5061274**  
(P=1e-04, Diff = -3.79)  
amygdaloid complex

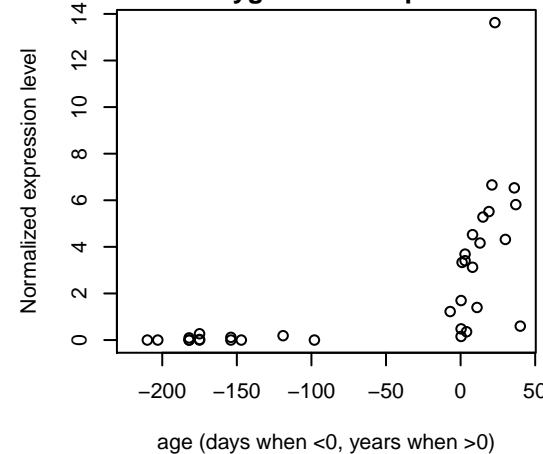

**SEC14L5\_5064859\_5069156**  
(P=0, Diff = -9.37)  
amygdaloid complex

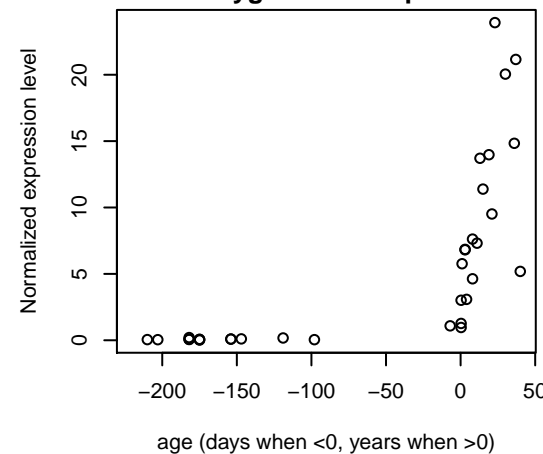

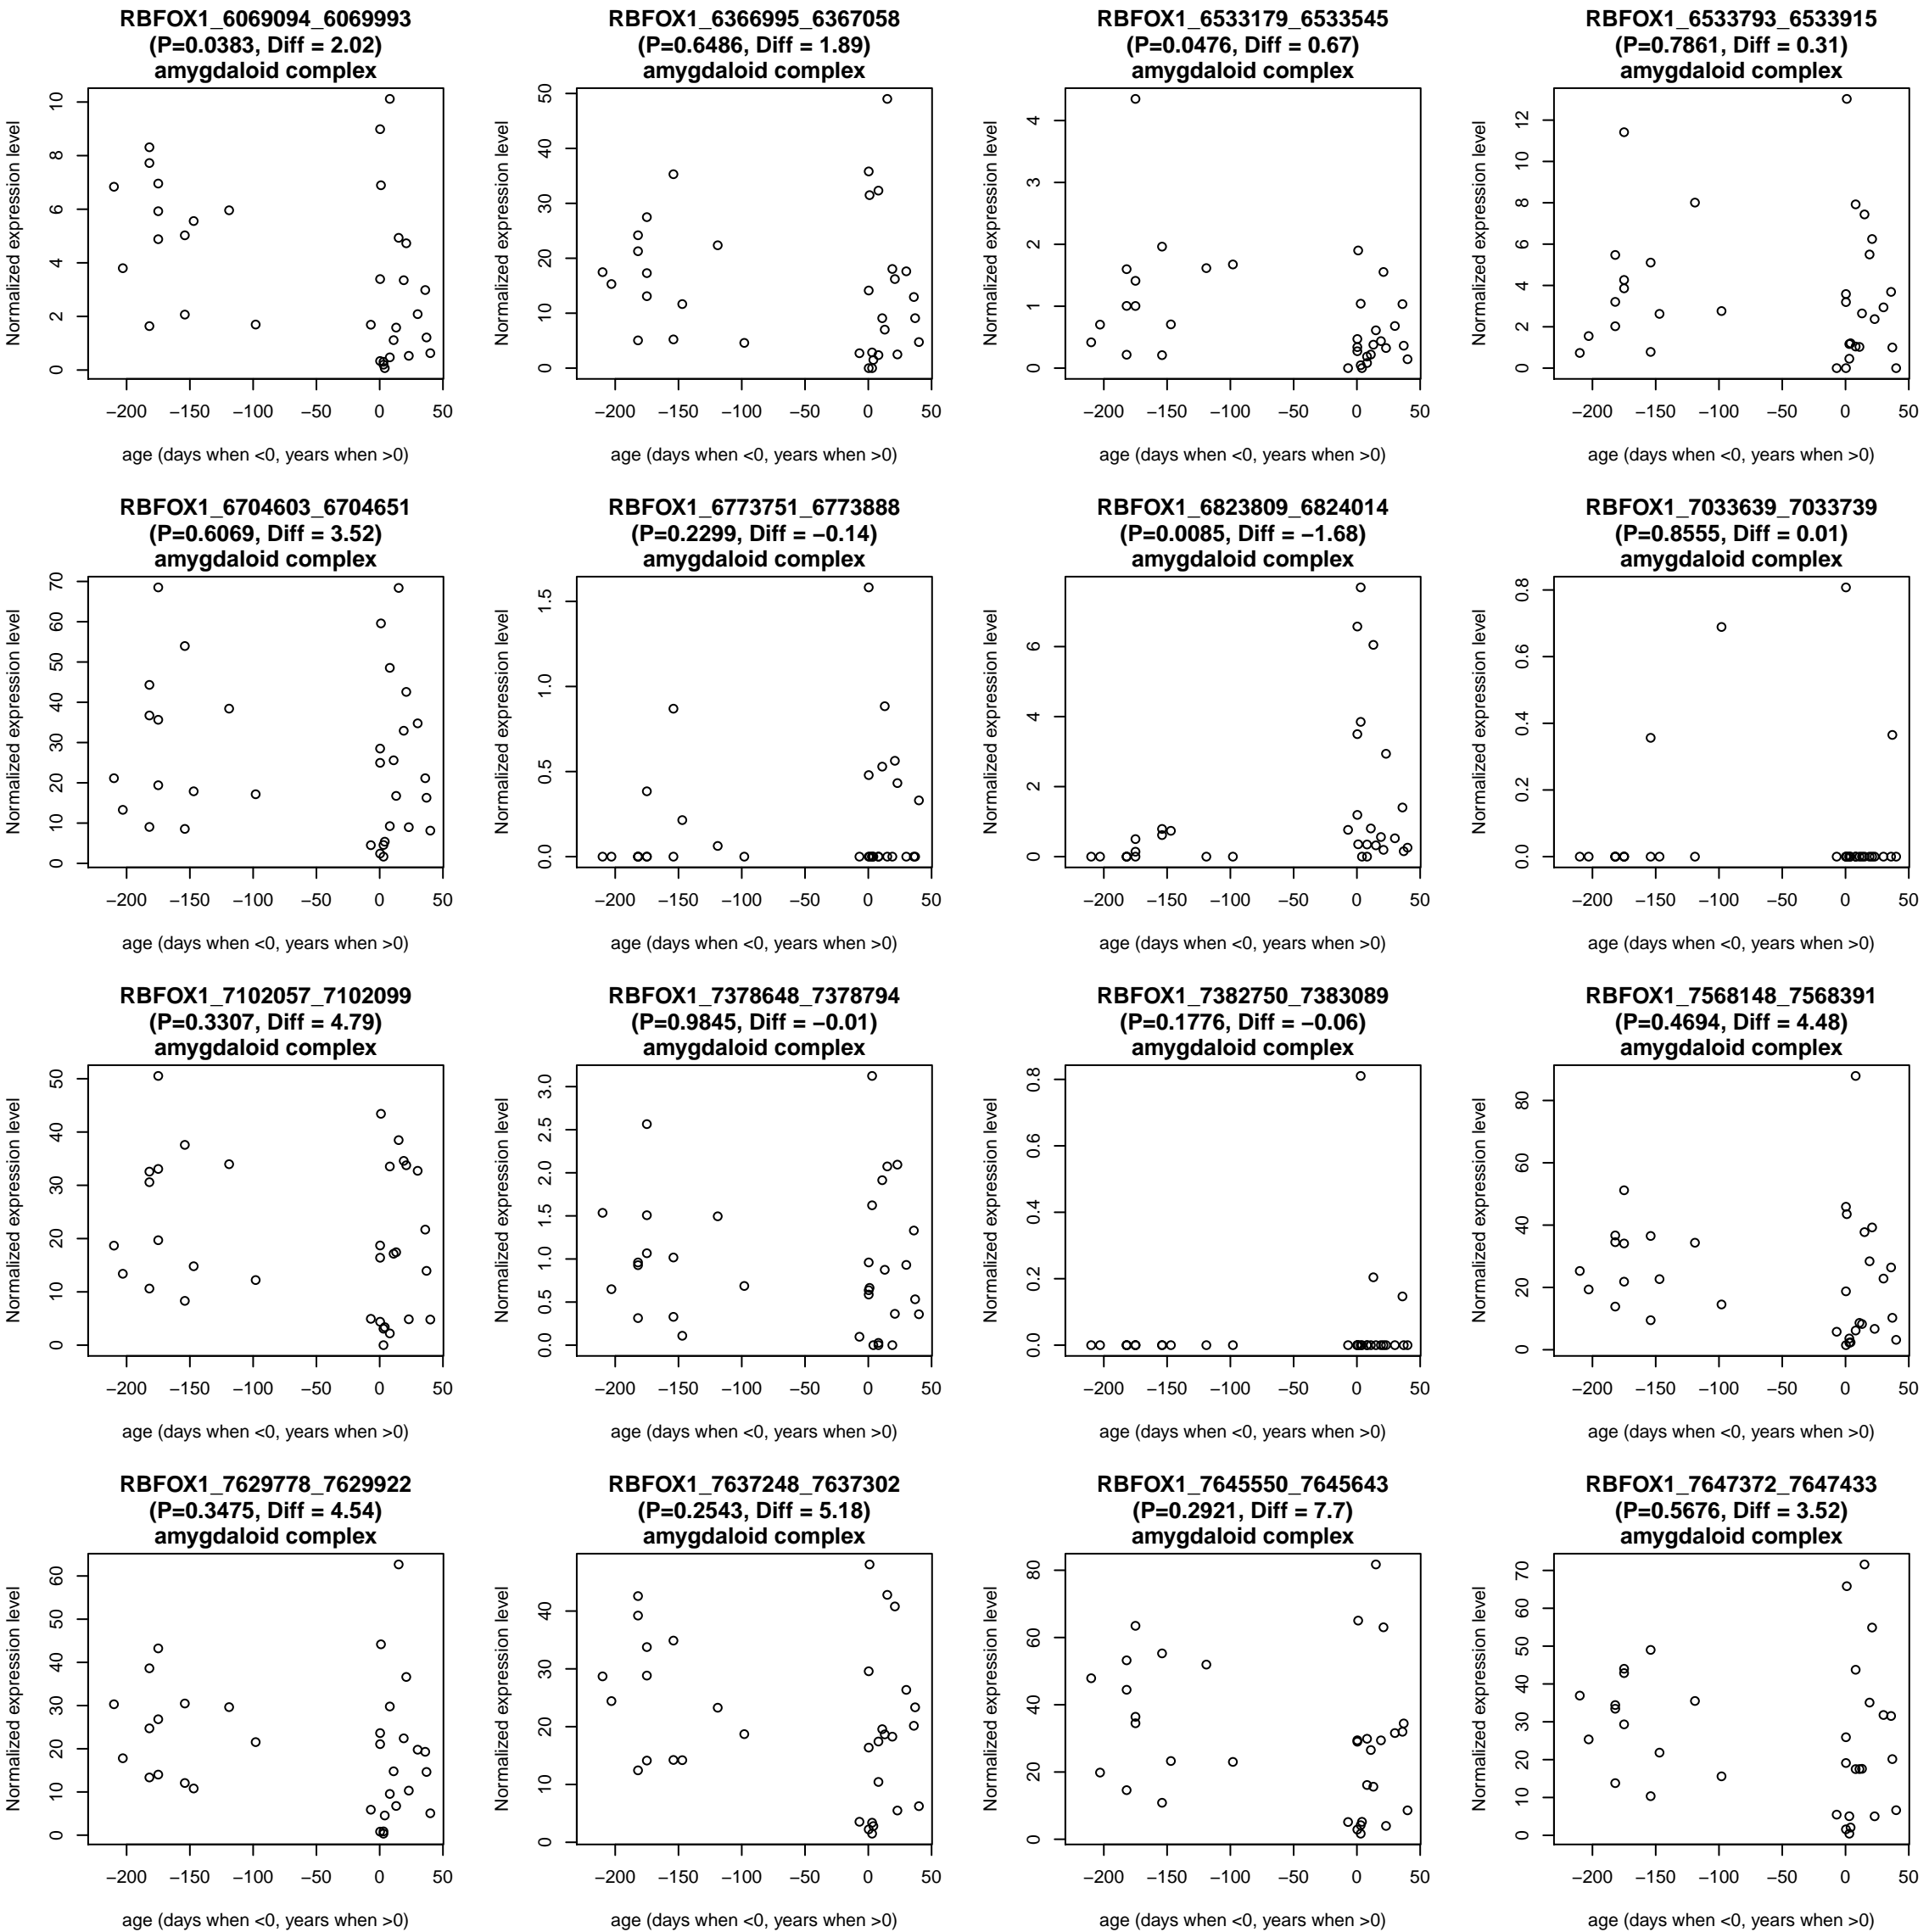

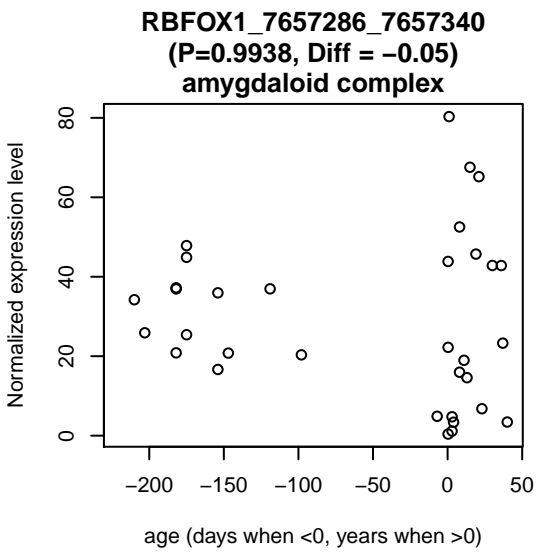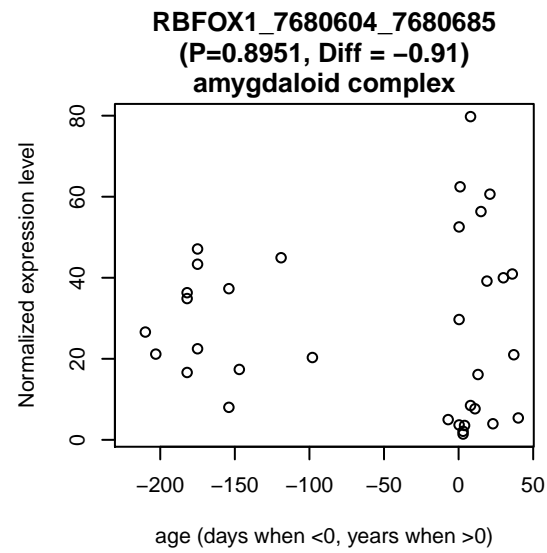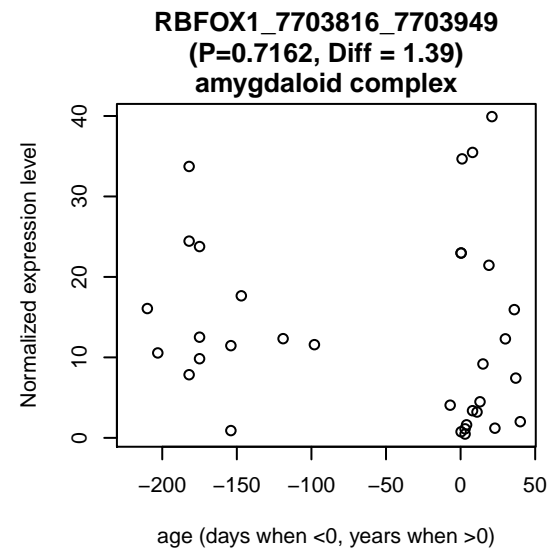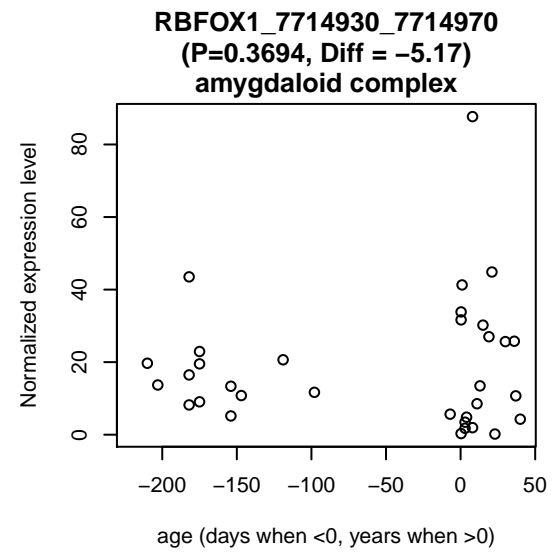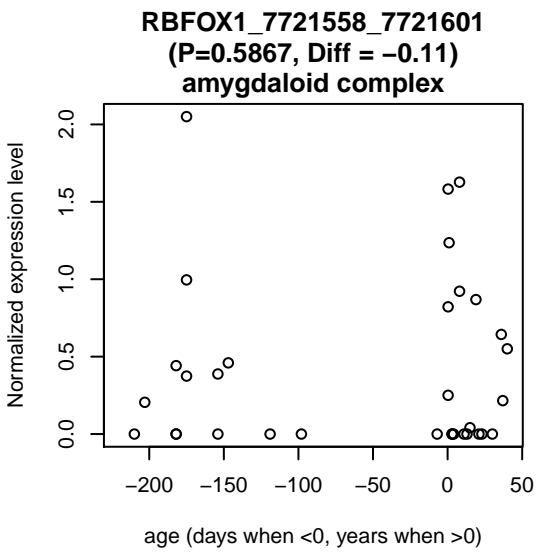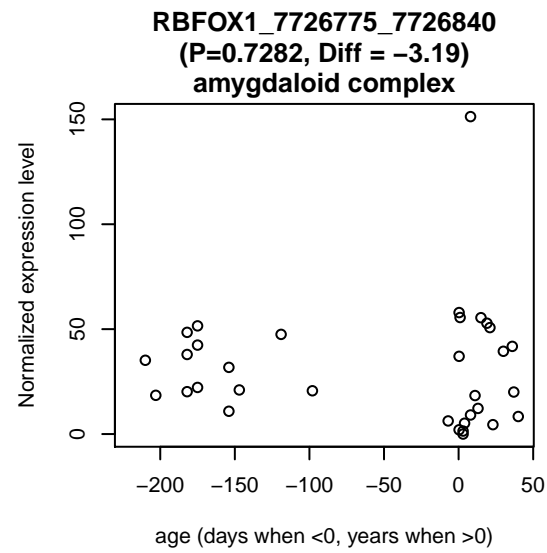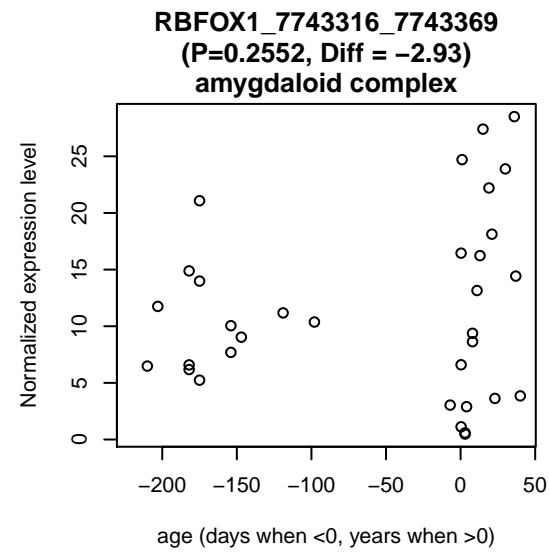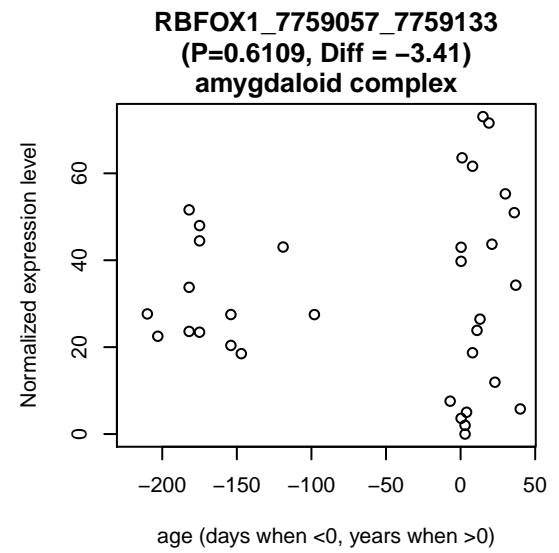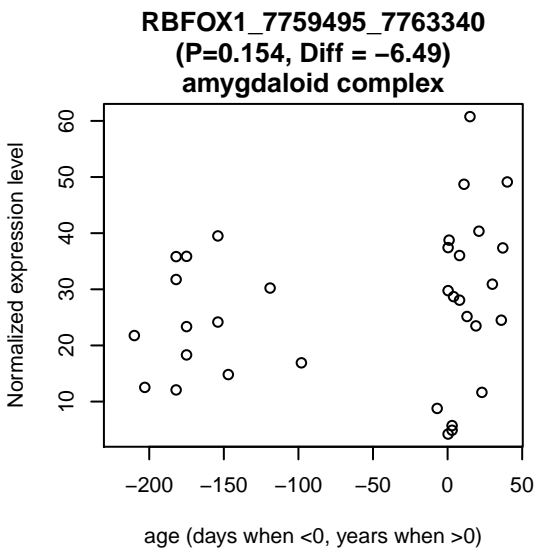

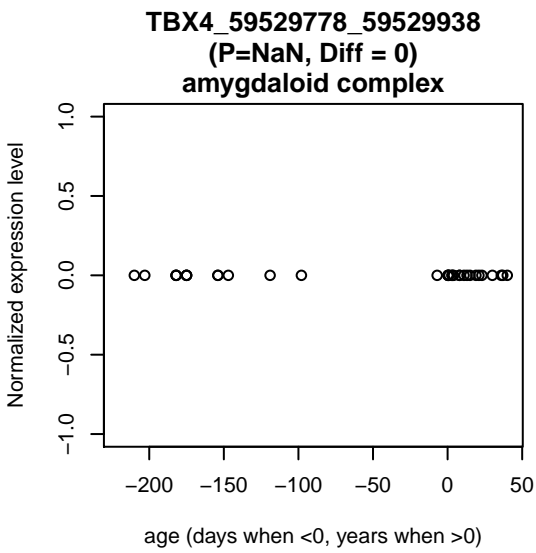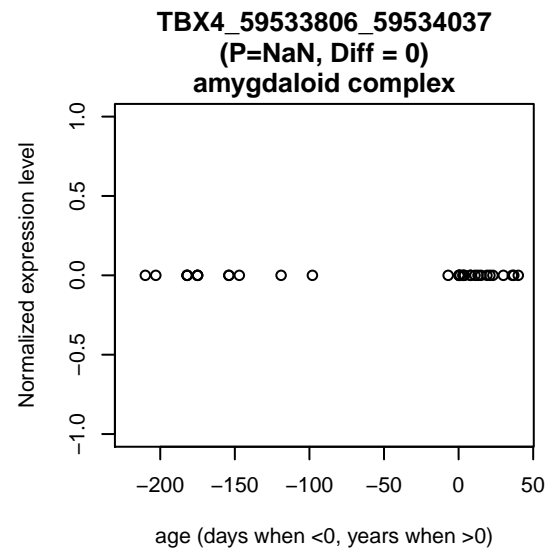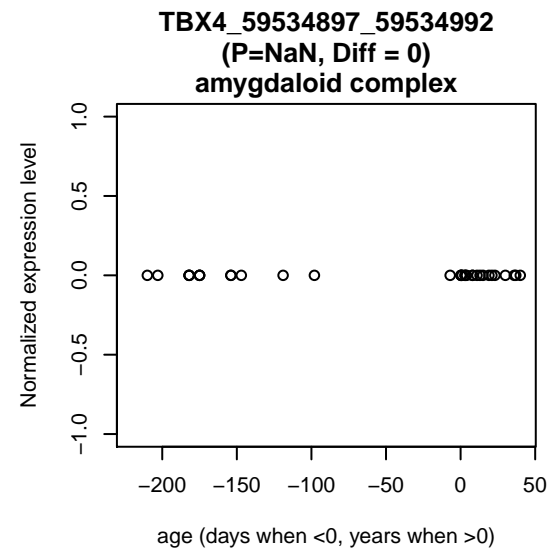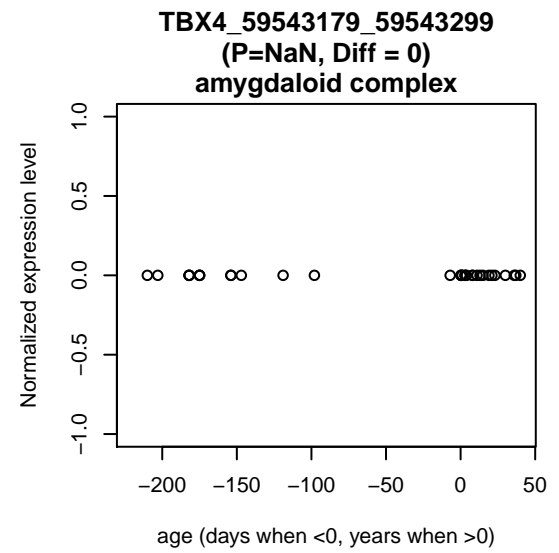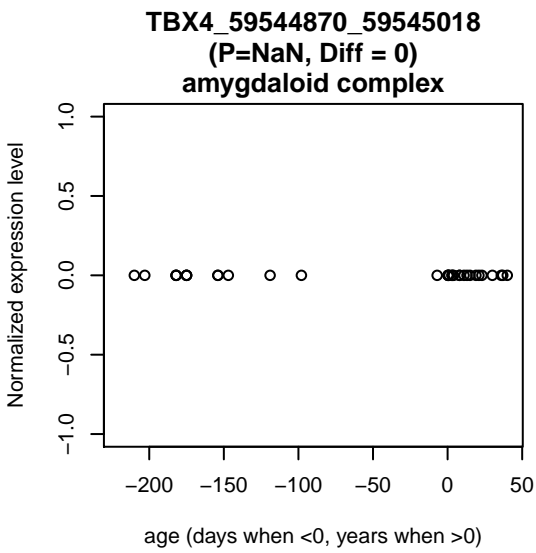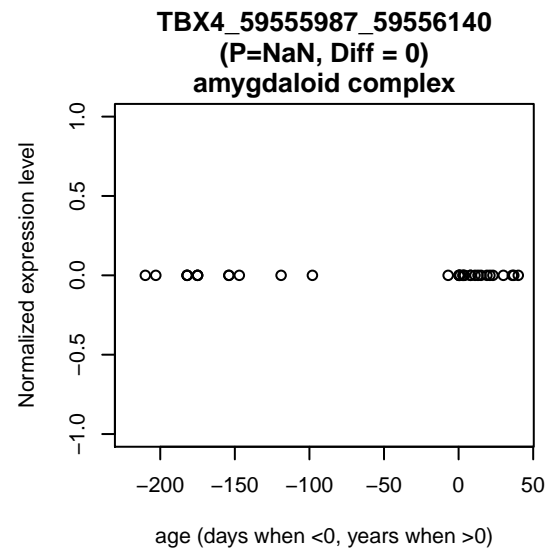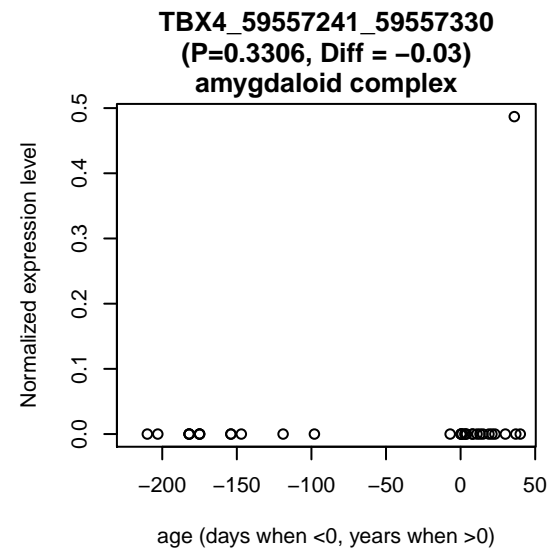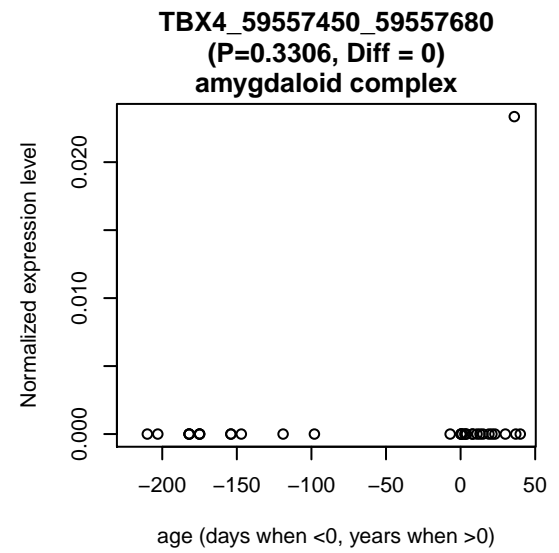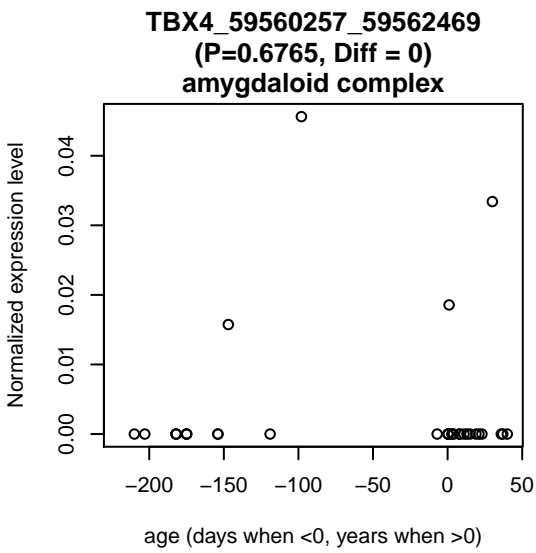

**FRG1\_190861942\_190862226**  
(P=0, Diff = 9.71)  
amygdaloid complex

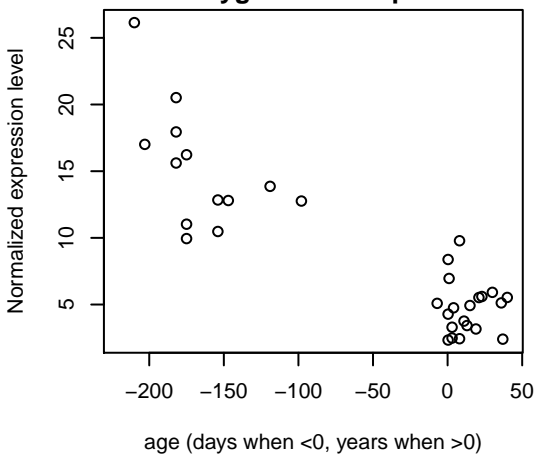

**FRG1\_190862987\_190863159**  
(P=0.1015, Diff = 0.04)  
amygdaloid complex

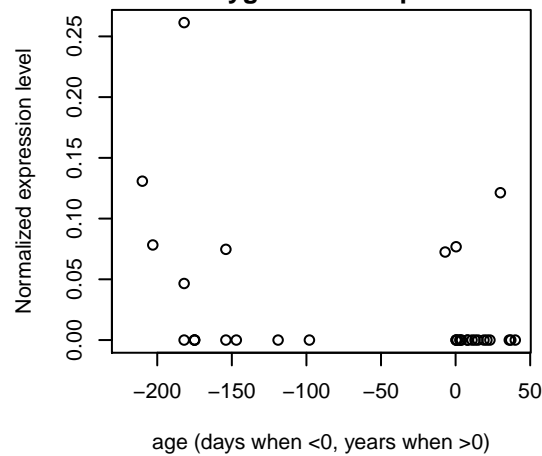

**FRG1\_190864356\_190864427**  
(P=0, Diff = 12.31)  
amygdaloid complex

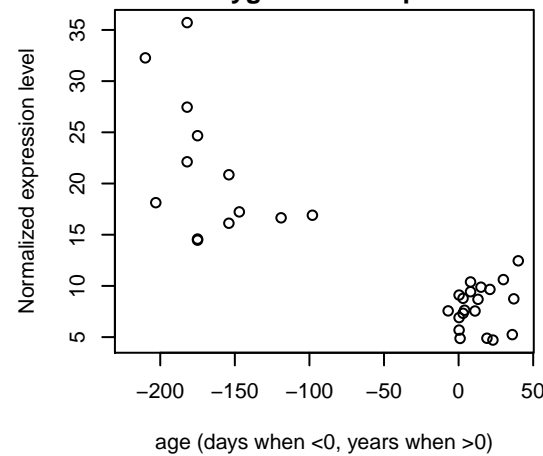

**FRG1\_190873316\_190873442**  
(P=0, Diff = 27.11)  
amygdaloid complex

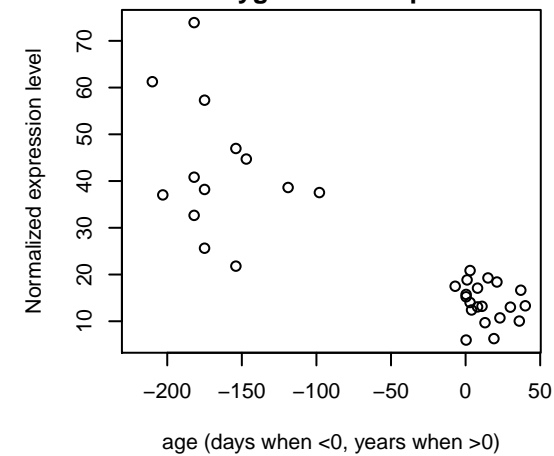

**FRG1\_190874222\_190874280**  
(P=0, Diff = 15.43)  
amygdaloid complex

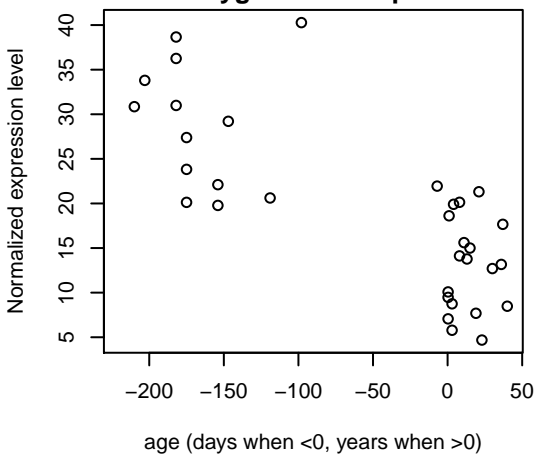

**FRG1\_190876191\_190876306**  
(P=0, Diff = 14.38)  
amygdaloid complex

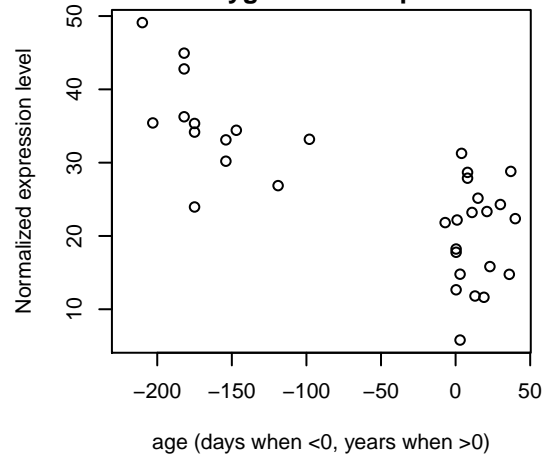

**FRG1\_190878552\_190878657**  
(P=0.0123, Diff = 4.57)  
amygdaloid complex

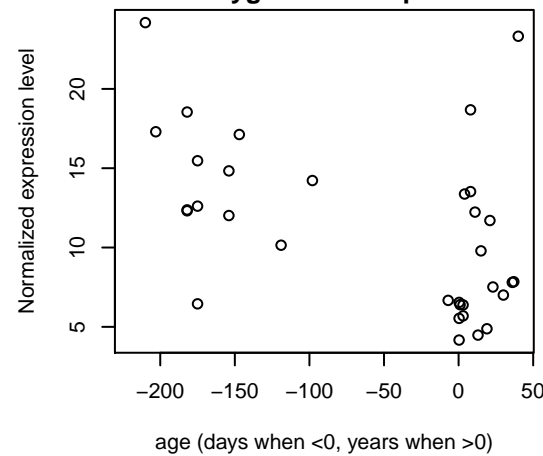

**FRG1\_190881902\_190881994**  
(P=0.0203, Diff = 4.55)  
amygdaloid complex

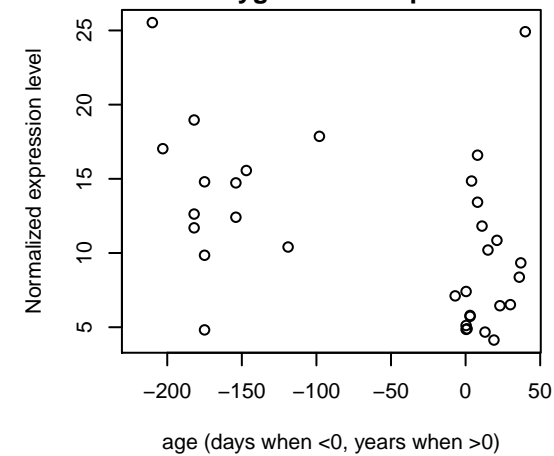

**FRG1\_190882016\_190882355**  
(P=0.1104, Diff = 0.31)  
amygdaloid complex

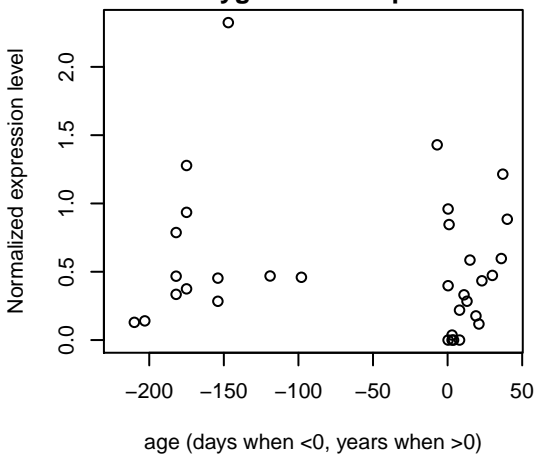

**FRG1\_190882583\_190882705**  
(P=0.2127, Diff = 0.12)  
amygdaloid complex

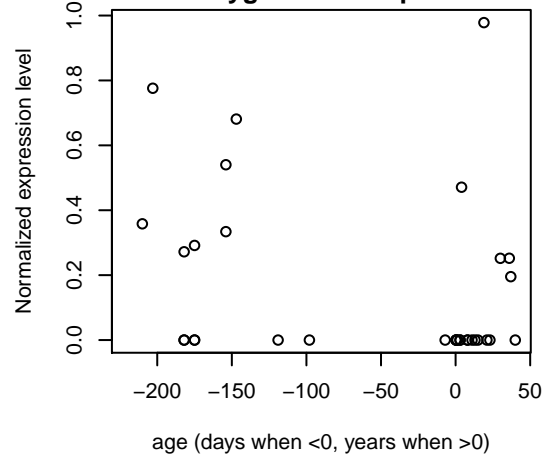

**FRG1\_190882976\_190883087**  
(P=0.005, Diff = 17.1)  
amygdaloid complex

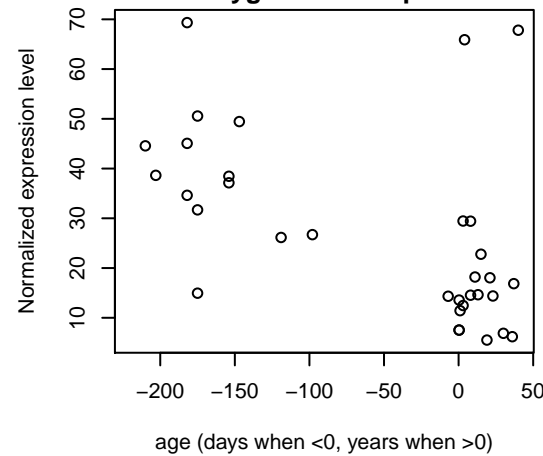

**FRG1\_190884247\_190884359**  
(P=0.216, Diff = 4.82)  
amygdaloid complex

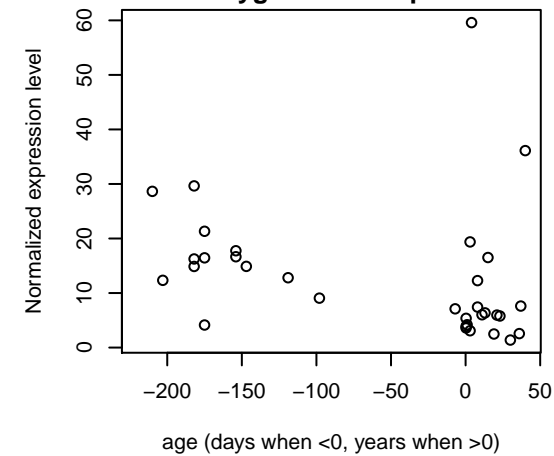



**METTL4\_2537523\_2539144**  
(P=0.2249, Diff = 0.4)  
amygdaloid complex

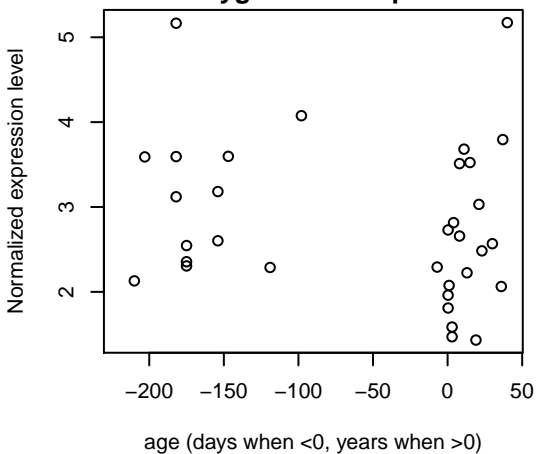

**METTL4\_2544193\_2544285**  
(P=0.0025, Diff = 2.08)  
amygdaloid complex

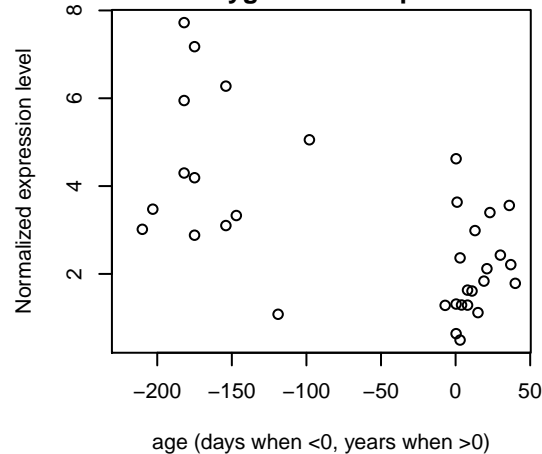

**METTL4\_2544651\_2544758**  
(P=0.0393, Diff = 1.1)  
amygdaloid complex

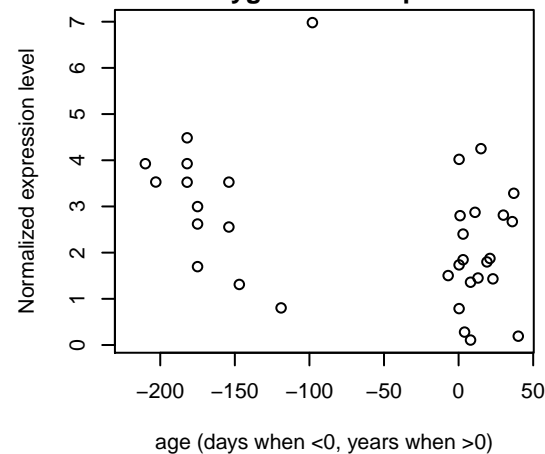

**METTL4\_2547353\_2547528**  
(P=0.0037, Diff = 1.99)  
amygdaloid complex

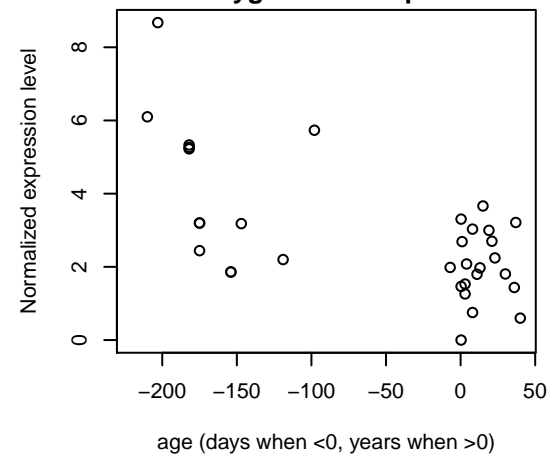

**METTL4\_2552693\_2552763**  
(P=0.005, Diff = 1.58)  
amygdaloid complex

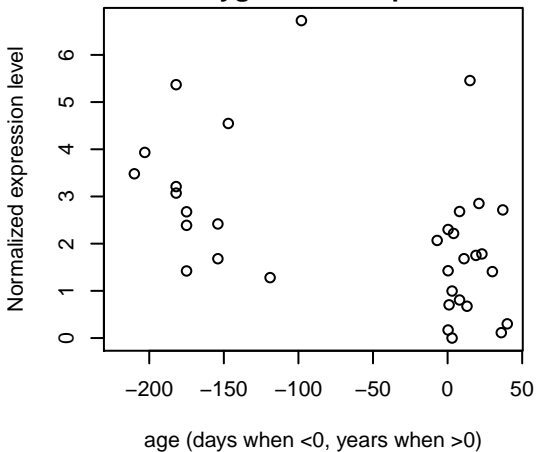

**METTL4\_2554667\_2555037**  
(P=0, Diff = 2.28)  
amygdaloid complex

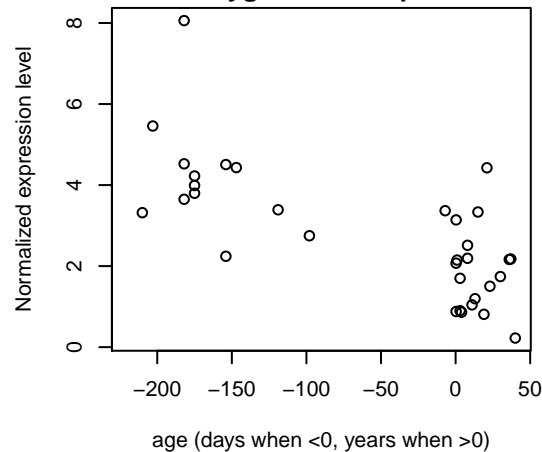

**METTL4\_2563795\_2563858**  
(P=0, Diff = 1.73)  
amygdaloid complex

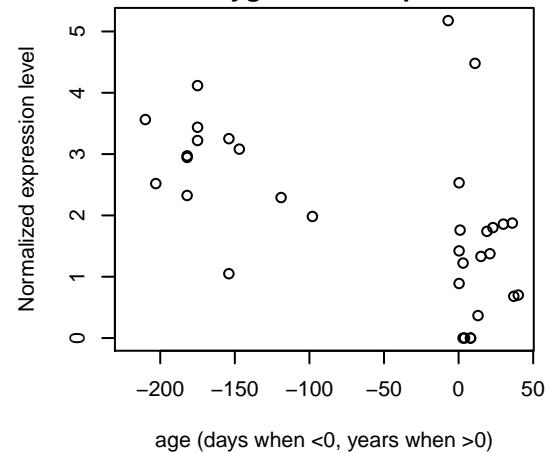

**METTL4\_2566819\_2567653**  
(P=0, Diff = 2.22)  
amygdaloid complex

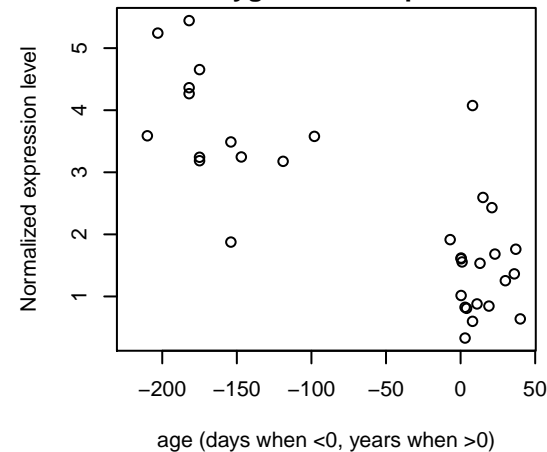

**METTL4\_2571147\_2571508**  
(P=2e-04, Diff = 1.54)  
amygdaloid complex

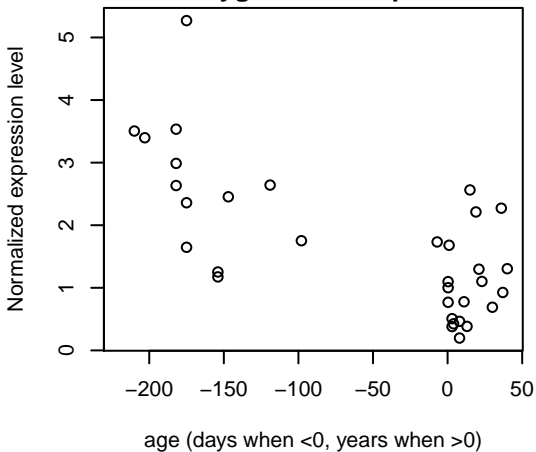

**C7orf11\_40172341\_40172858**  
(P=2e-04, Diff = 8.34)  
amygdaloid complex

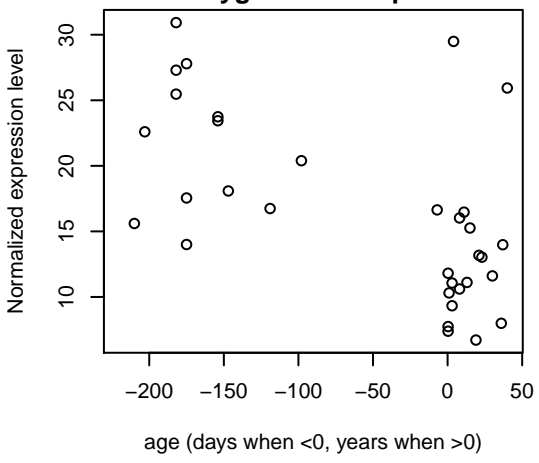

**C7orf11\_40173827\_40174258**  
(P=1e-04, Diff = 11.41)  
amygdaloid complex

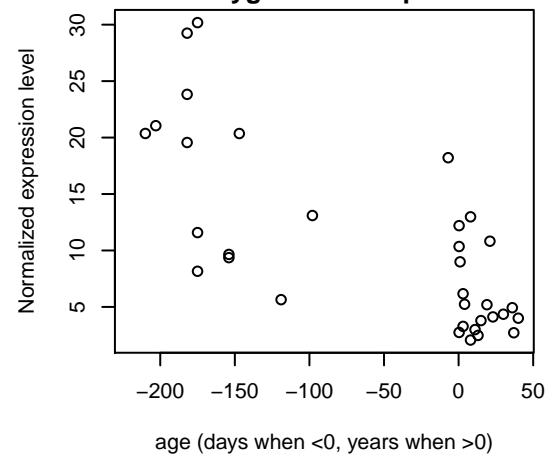

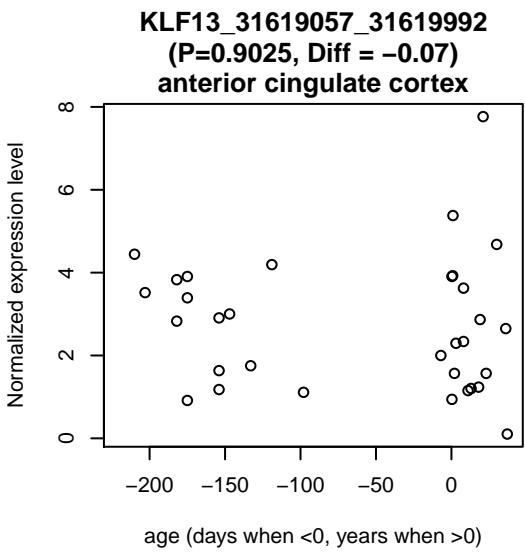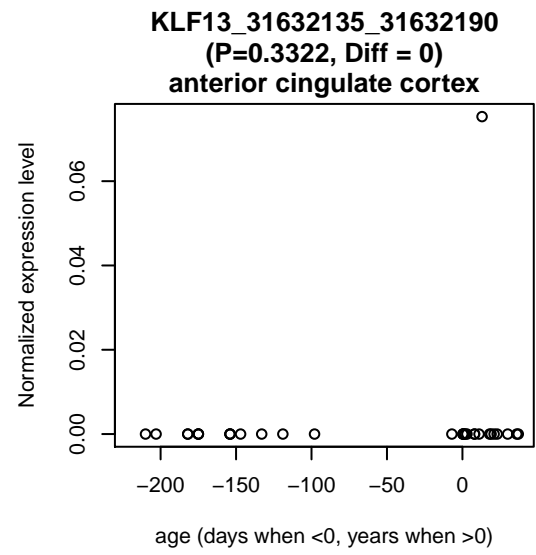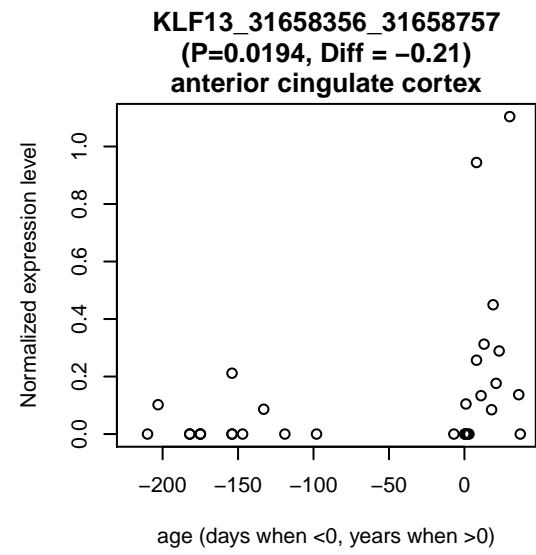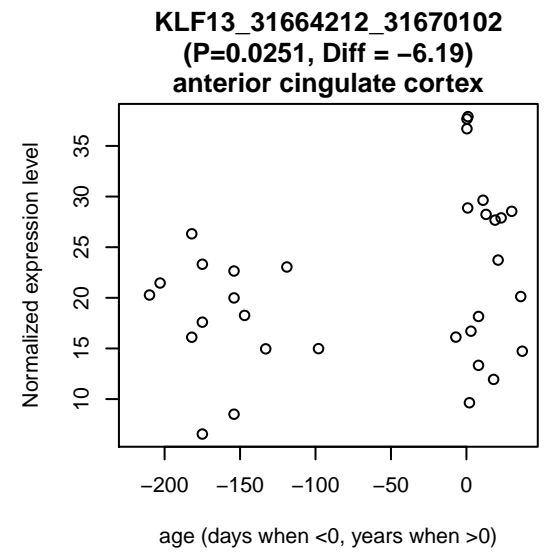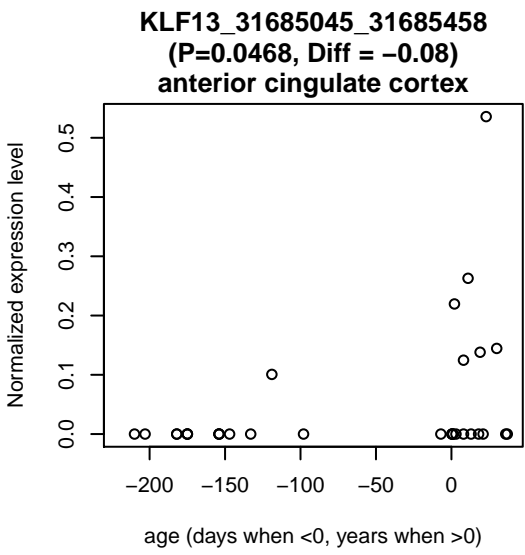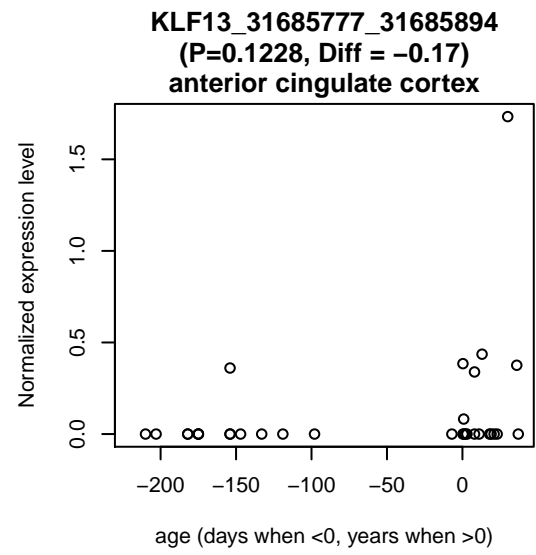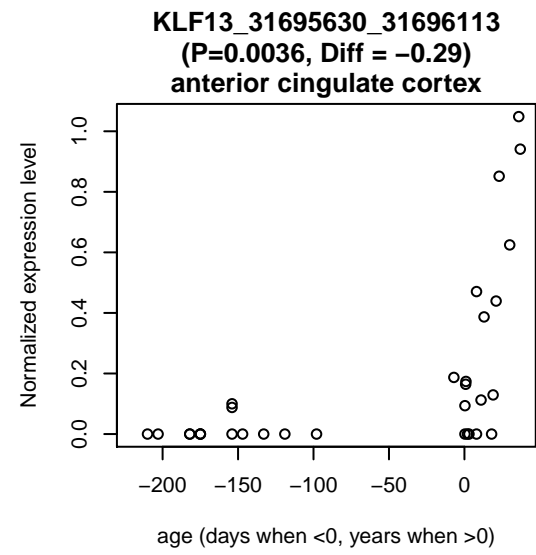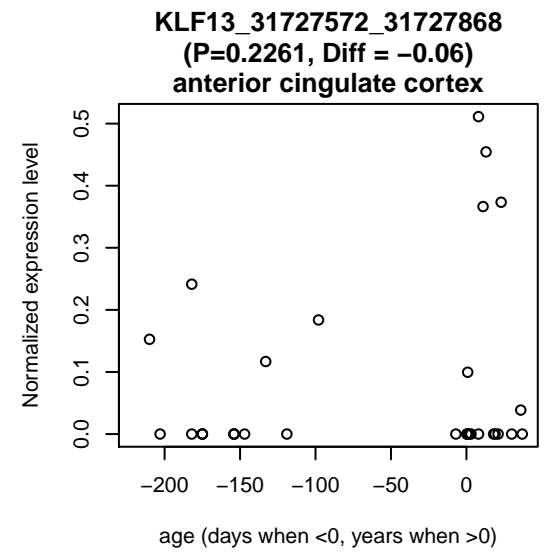

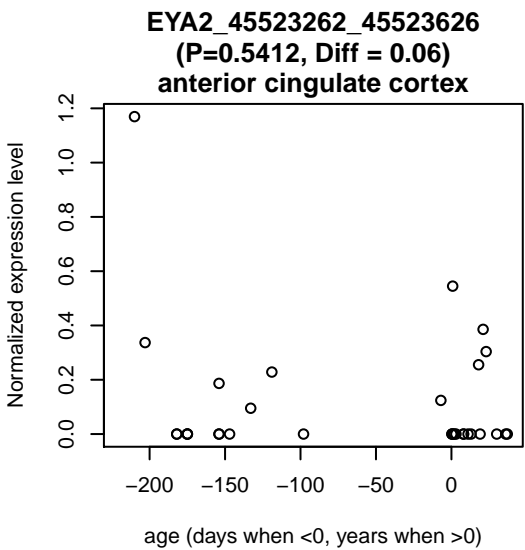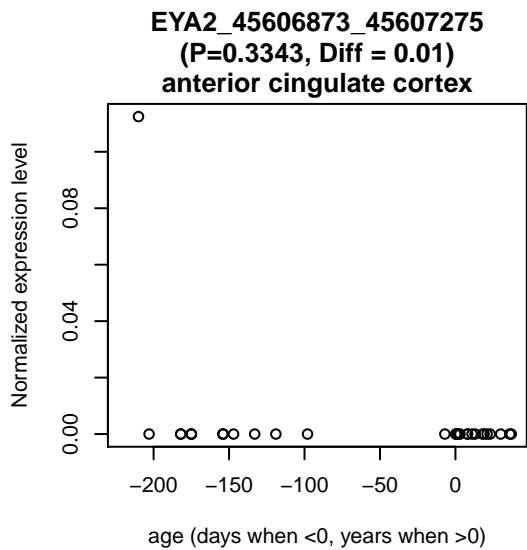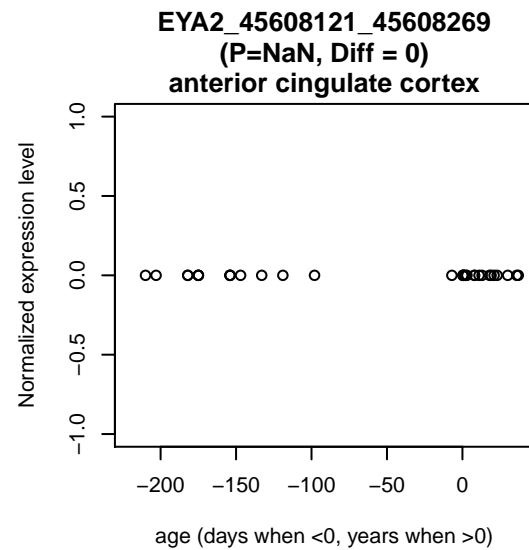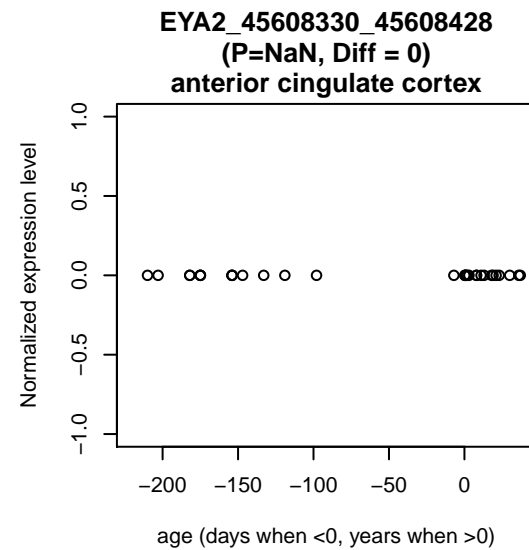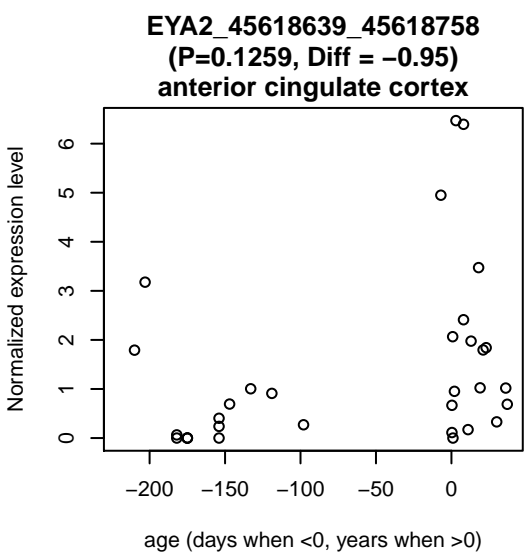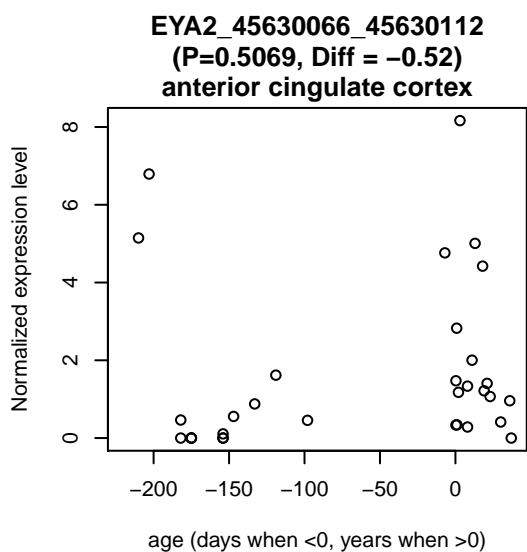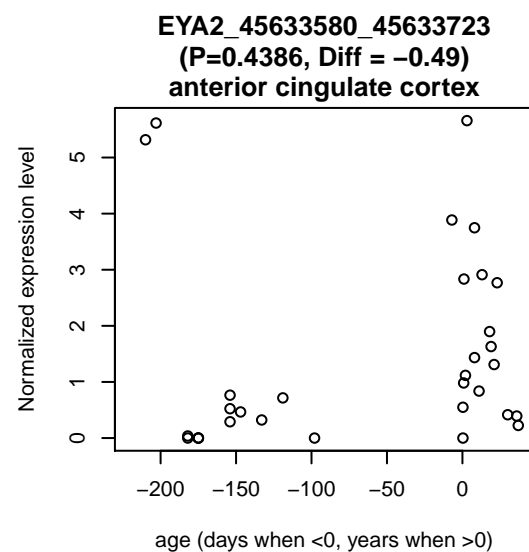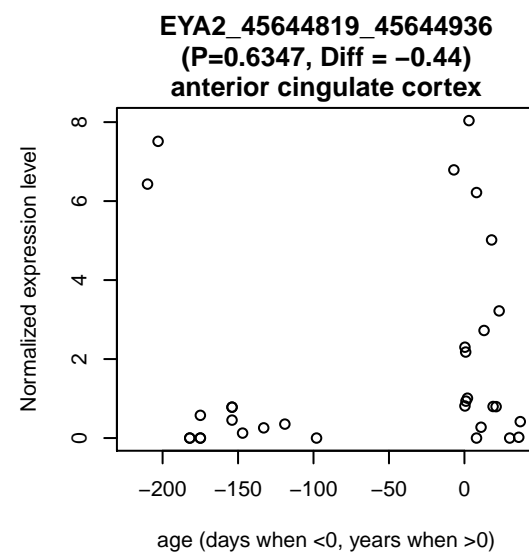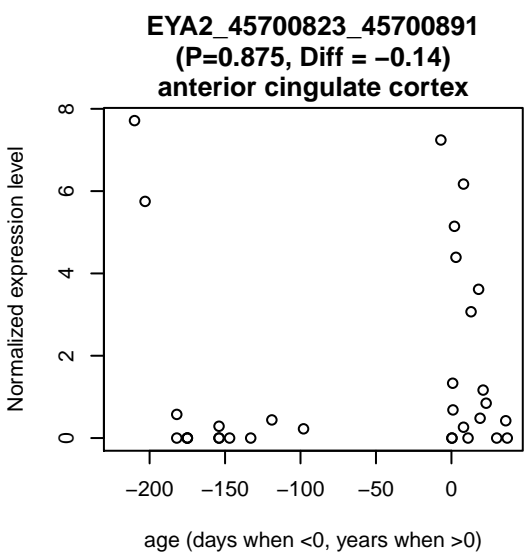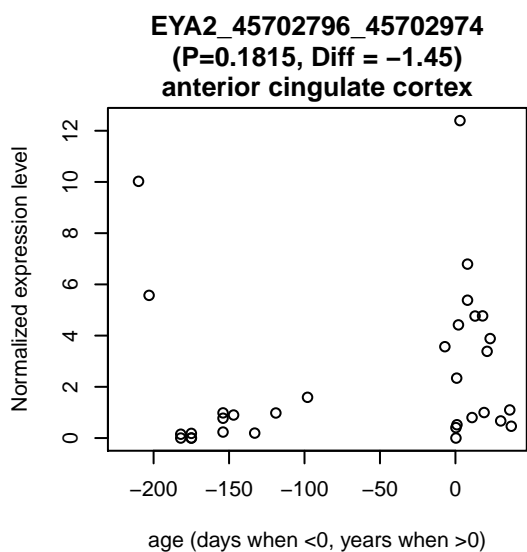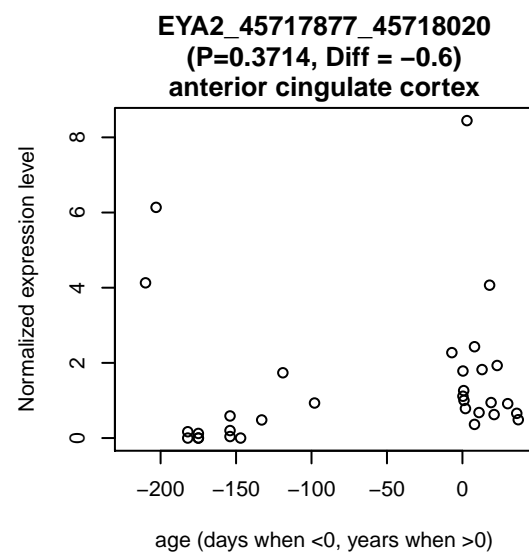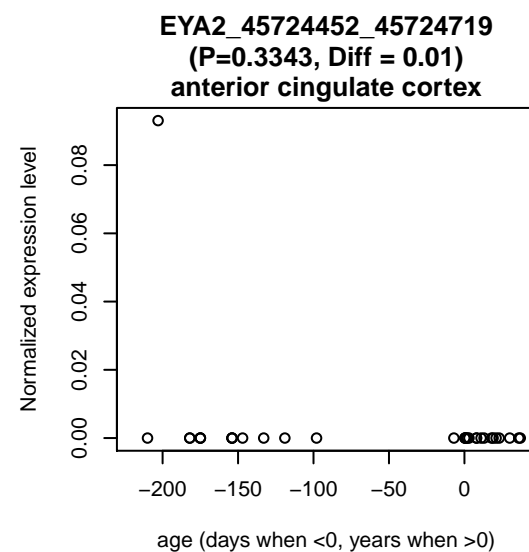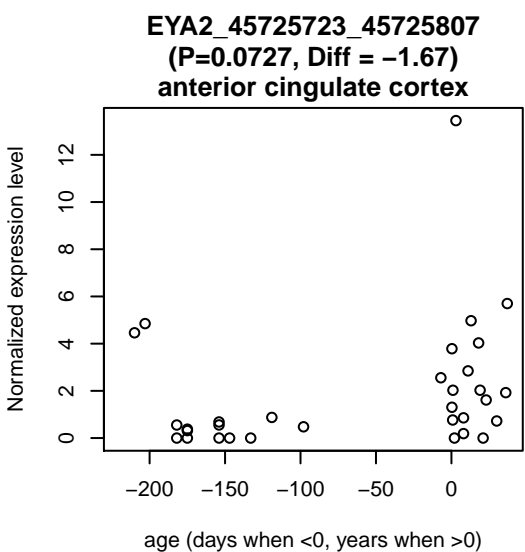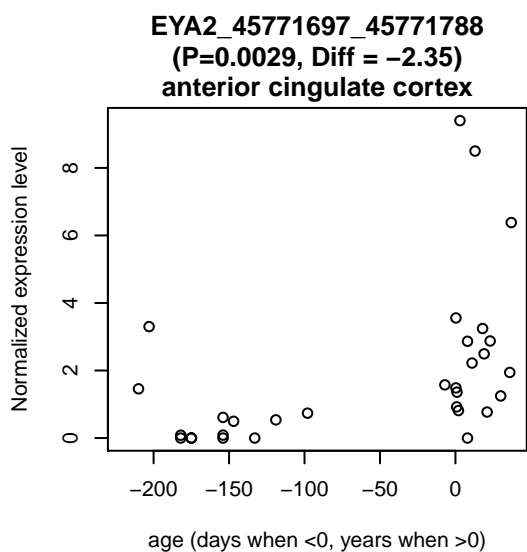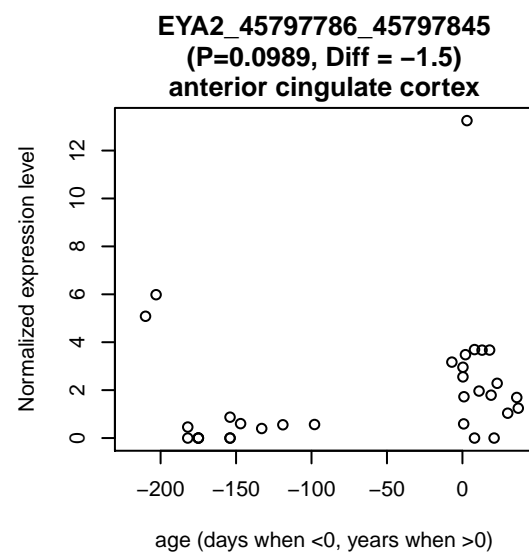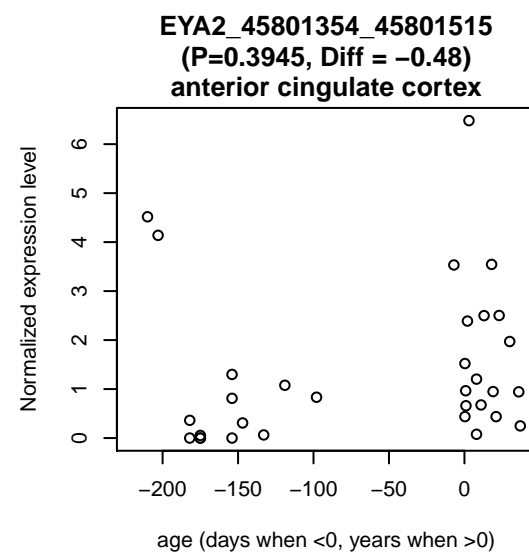

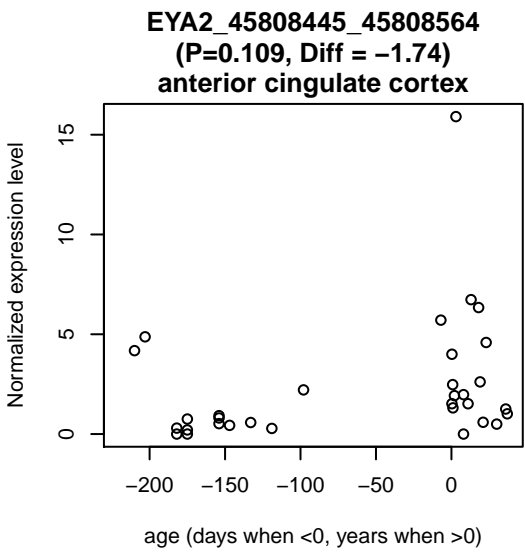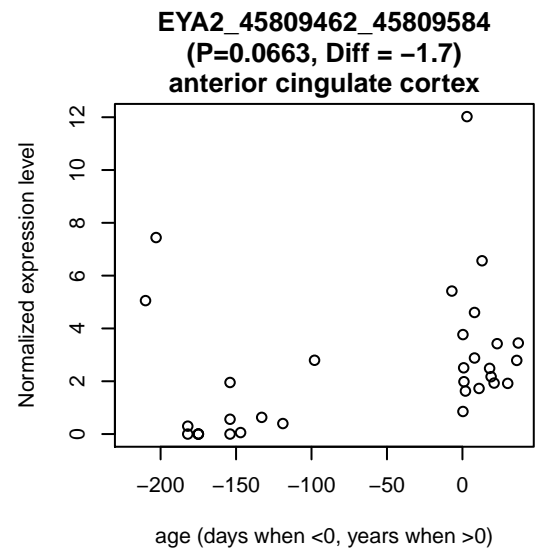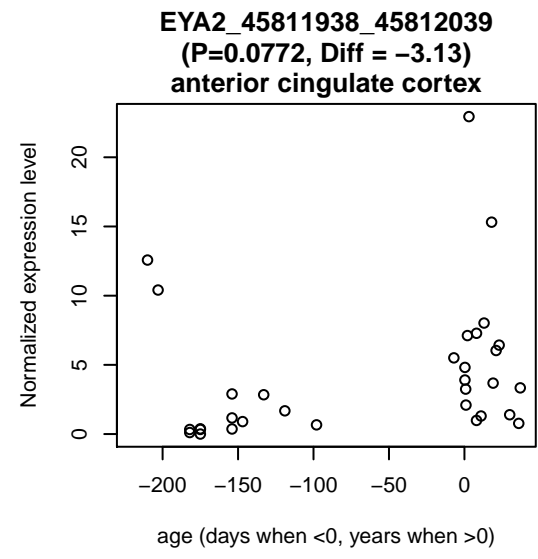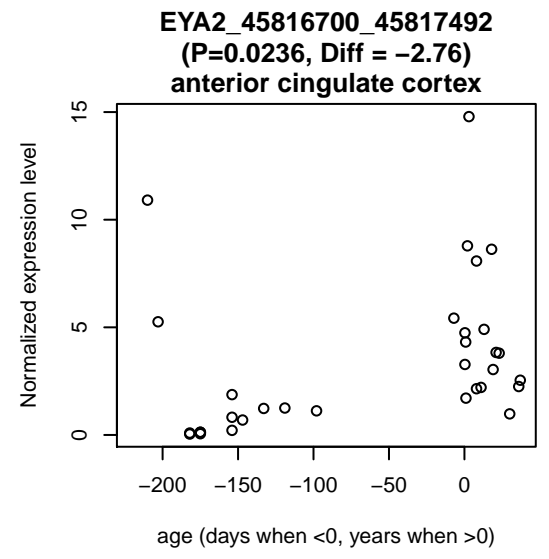

**LMCD1\_8543392\_8543666**  
(P=0.7729, Diff = -0.05)  
anterior cingulate cortex

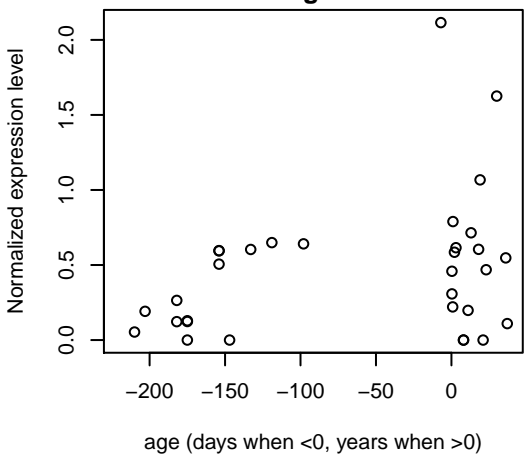

**LMCD1\_8556610\_8556681**  
(P=0.1978, Diff = -0.09)  
anterior cingulate cortex

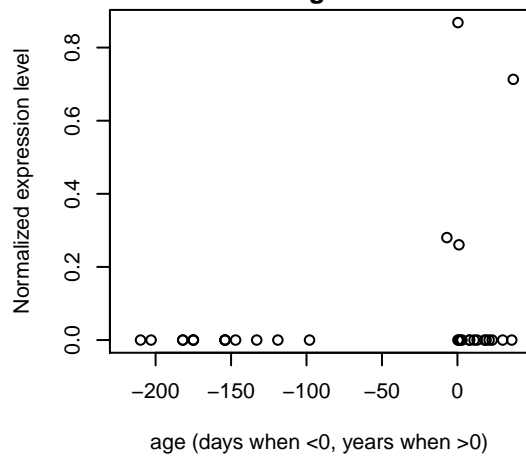

**LMCD1\_8574422\_8574511**  
(P=0.264, Diff = -0.88)  
anterior cingulate cortex

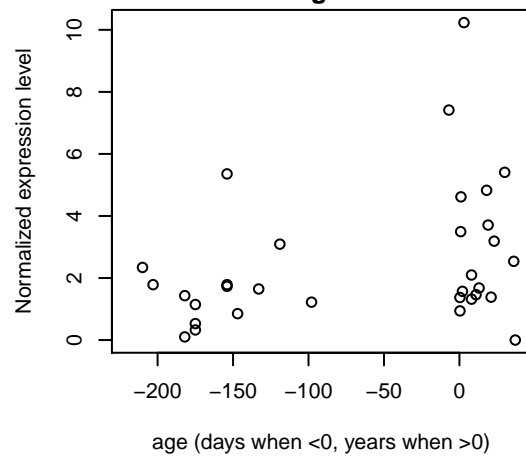

**LMCD1\_8578868\_8579204**  
(P=0.0647, Diff = -1.22)  
anterior cingulate cortex

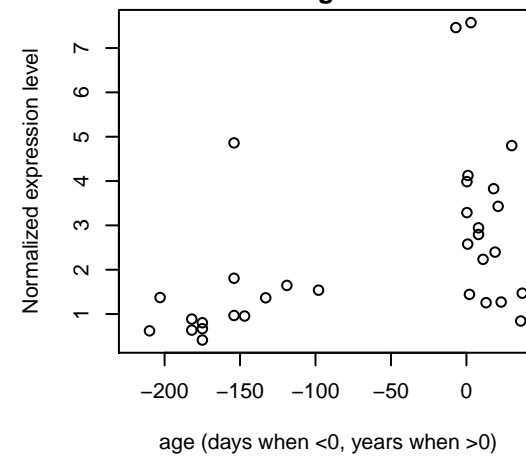

**LMCD1\_8590253\_8590589**  
(P=0.1918, Diff = -0.96)  
anterior cingulate cortex

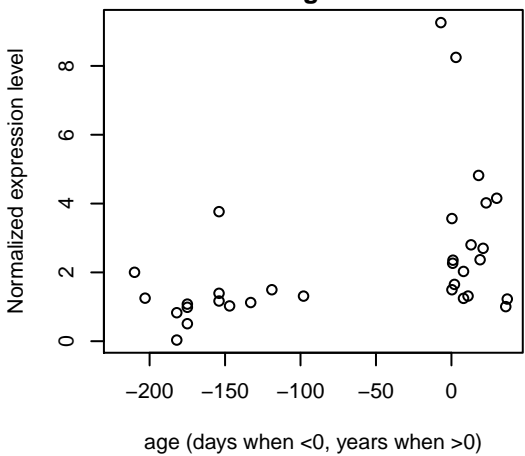

**LMCD1\_8591559\_8592135**  
(P=0.1554, Diff = -0.07)  
anterior cingulate cortex

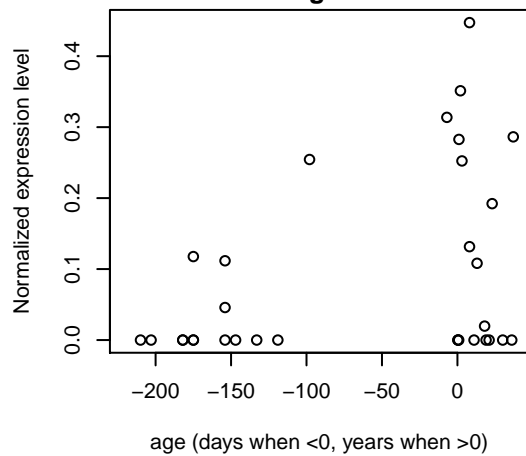

**LMCD1\_8607117\_8607333**  
(P=0.3026, Diff = -0.51)  
anterior cingulate cortex

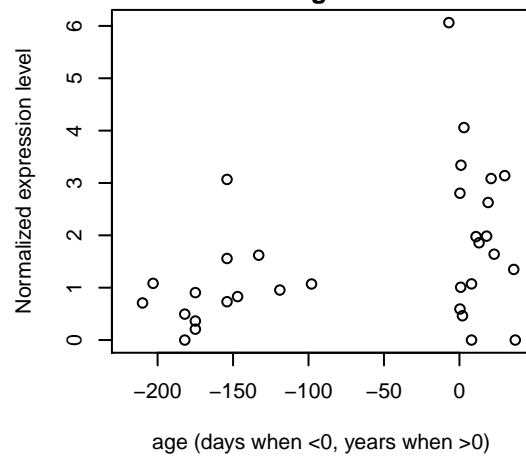

**LMCD1\_8609125\_8609805**  
(P=0.0281, Diff = -1.87)  
anterior cingulate cortex

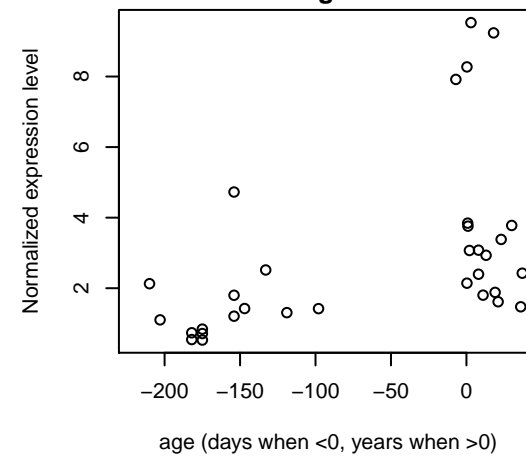

**WVOX\_78133550\_78133782**  
(P=0.884, Diff = 0.11)  
anterior cingulate cortex

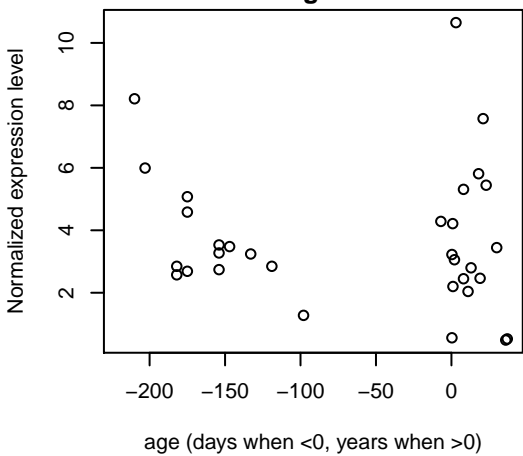

**WVOX\_78142319\_78142384**  
(P=0.5598, Diff = -0.63)  
anterior cingulate cortex

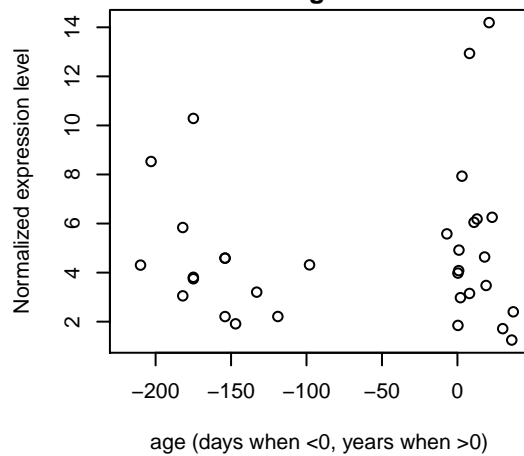

**WVOX\_78143674\_78143732**  
(P=0.2274, Diff = -1.68)  
anterior cingulate cortex

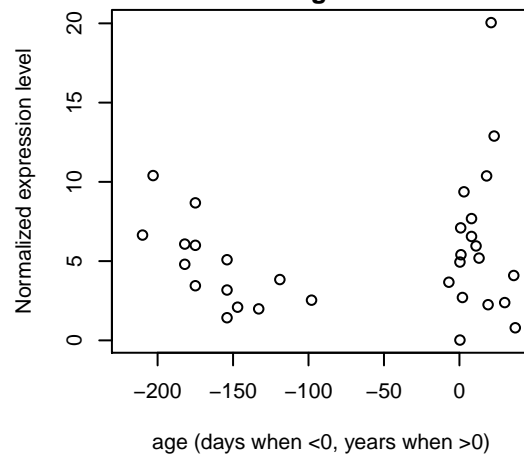

**WVOX\_78148872\_78149051**  
(P=0.1333, Diff = -1.79)  
anterior cingulate cortex

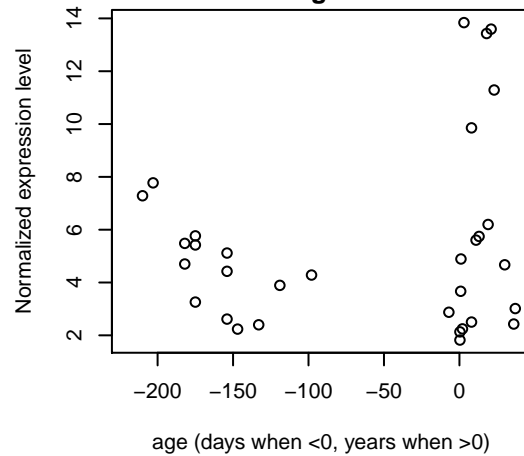

**WVOX\_78198079\_78198186**  
(P=0.2436, Diff = -1.05)  
anterior cingulate cortex

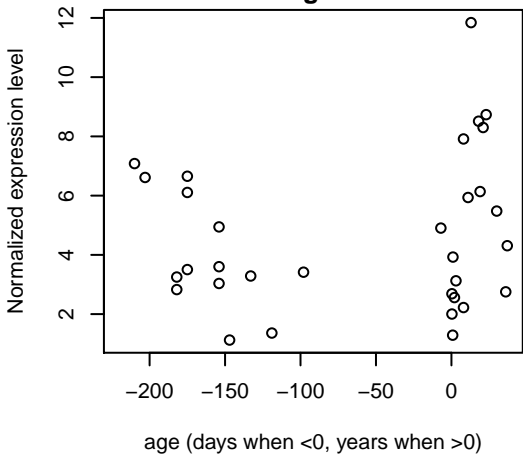

**WVOX\_78312499\_78312593**  
(P=0.1916, Diff = -0.21)  
anterior cingulate cortex

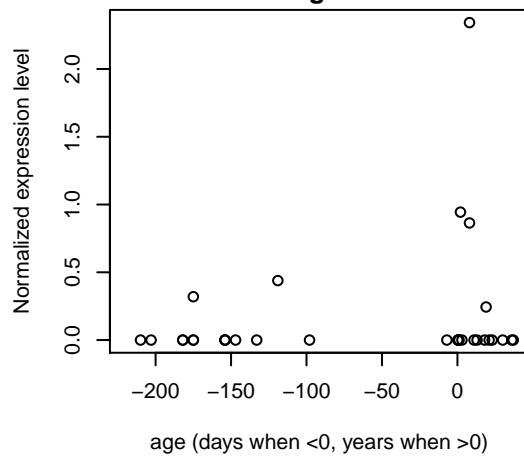

**WVOX\_78420756\_78420845**  
(P=0.0535, Diff = -2.77)  
anterior cingulate cortex

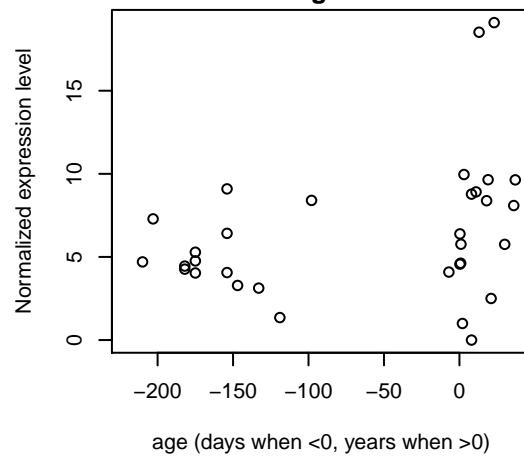

**WVOX\_78458766\_78458952**  
(P=0, Diff = -3.48)  
anterior cingulate cortex

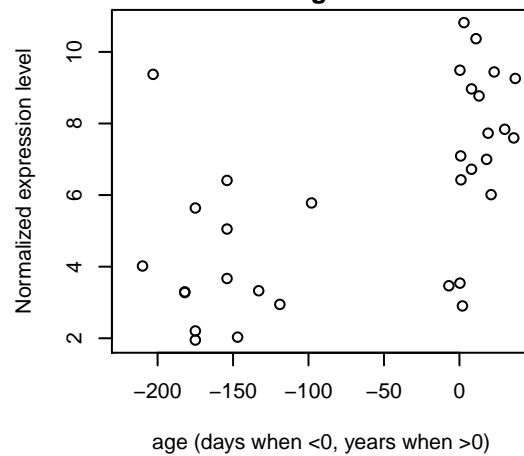

**WVOX\_78466384\_78466649**  
(P=0.0671, Diff = -1.22)  
anterior cingulate cortex

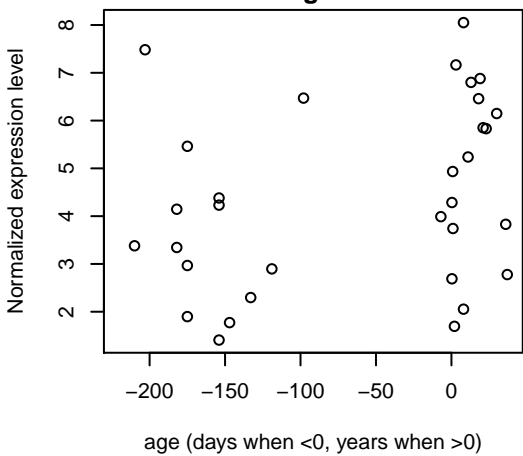

**WVOX\_78790836\_78790912**  
(P=0.2263, Diff = -0.08)  
anterior cingulate cortex

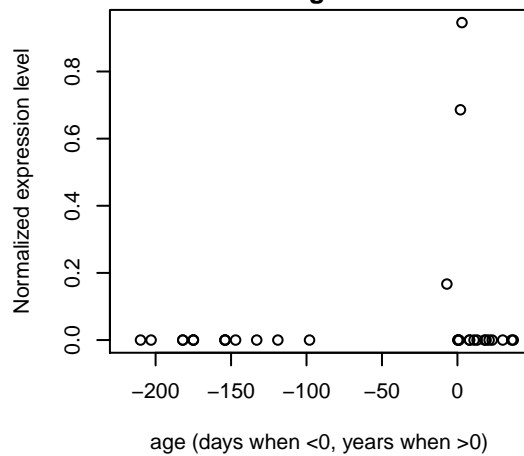

**WVOX\_79245504\_79246031**  
(P=2e-04, Diff = -2.74)  
anterior cingulate cortex

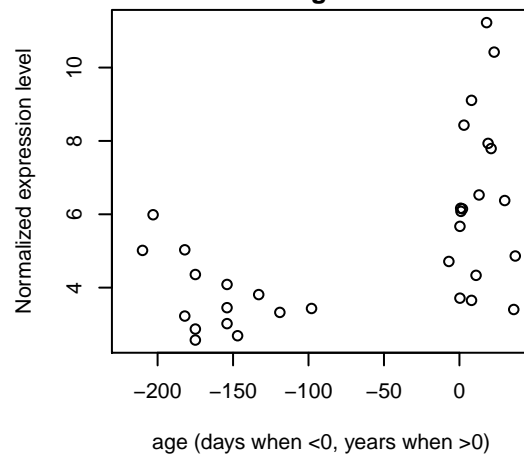

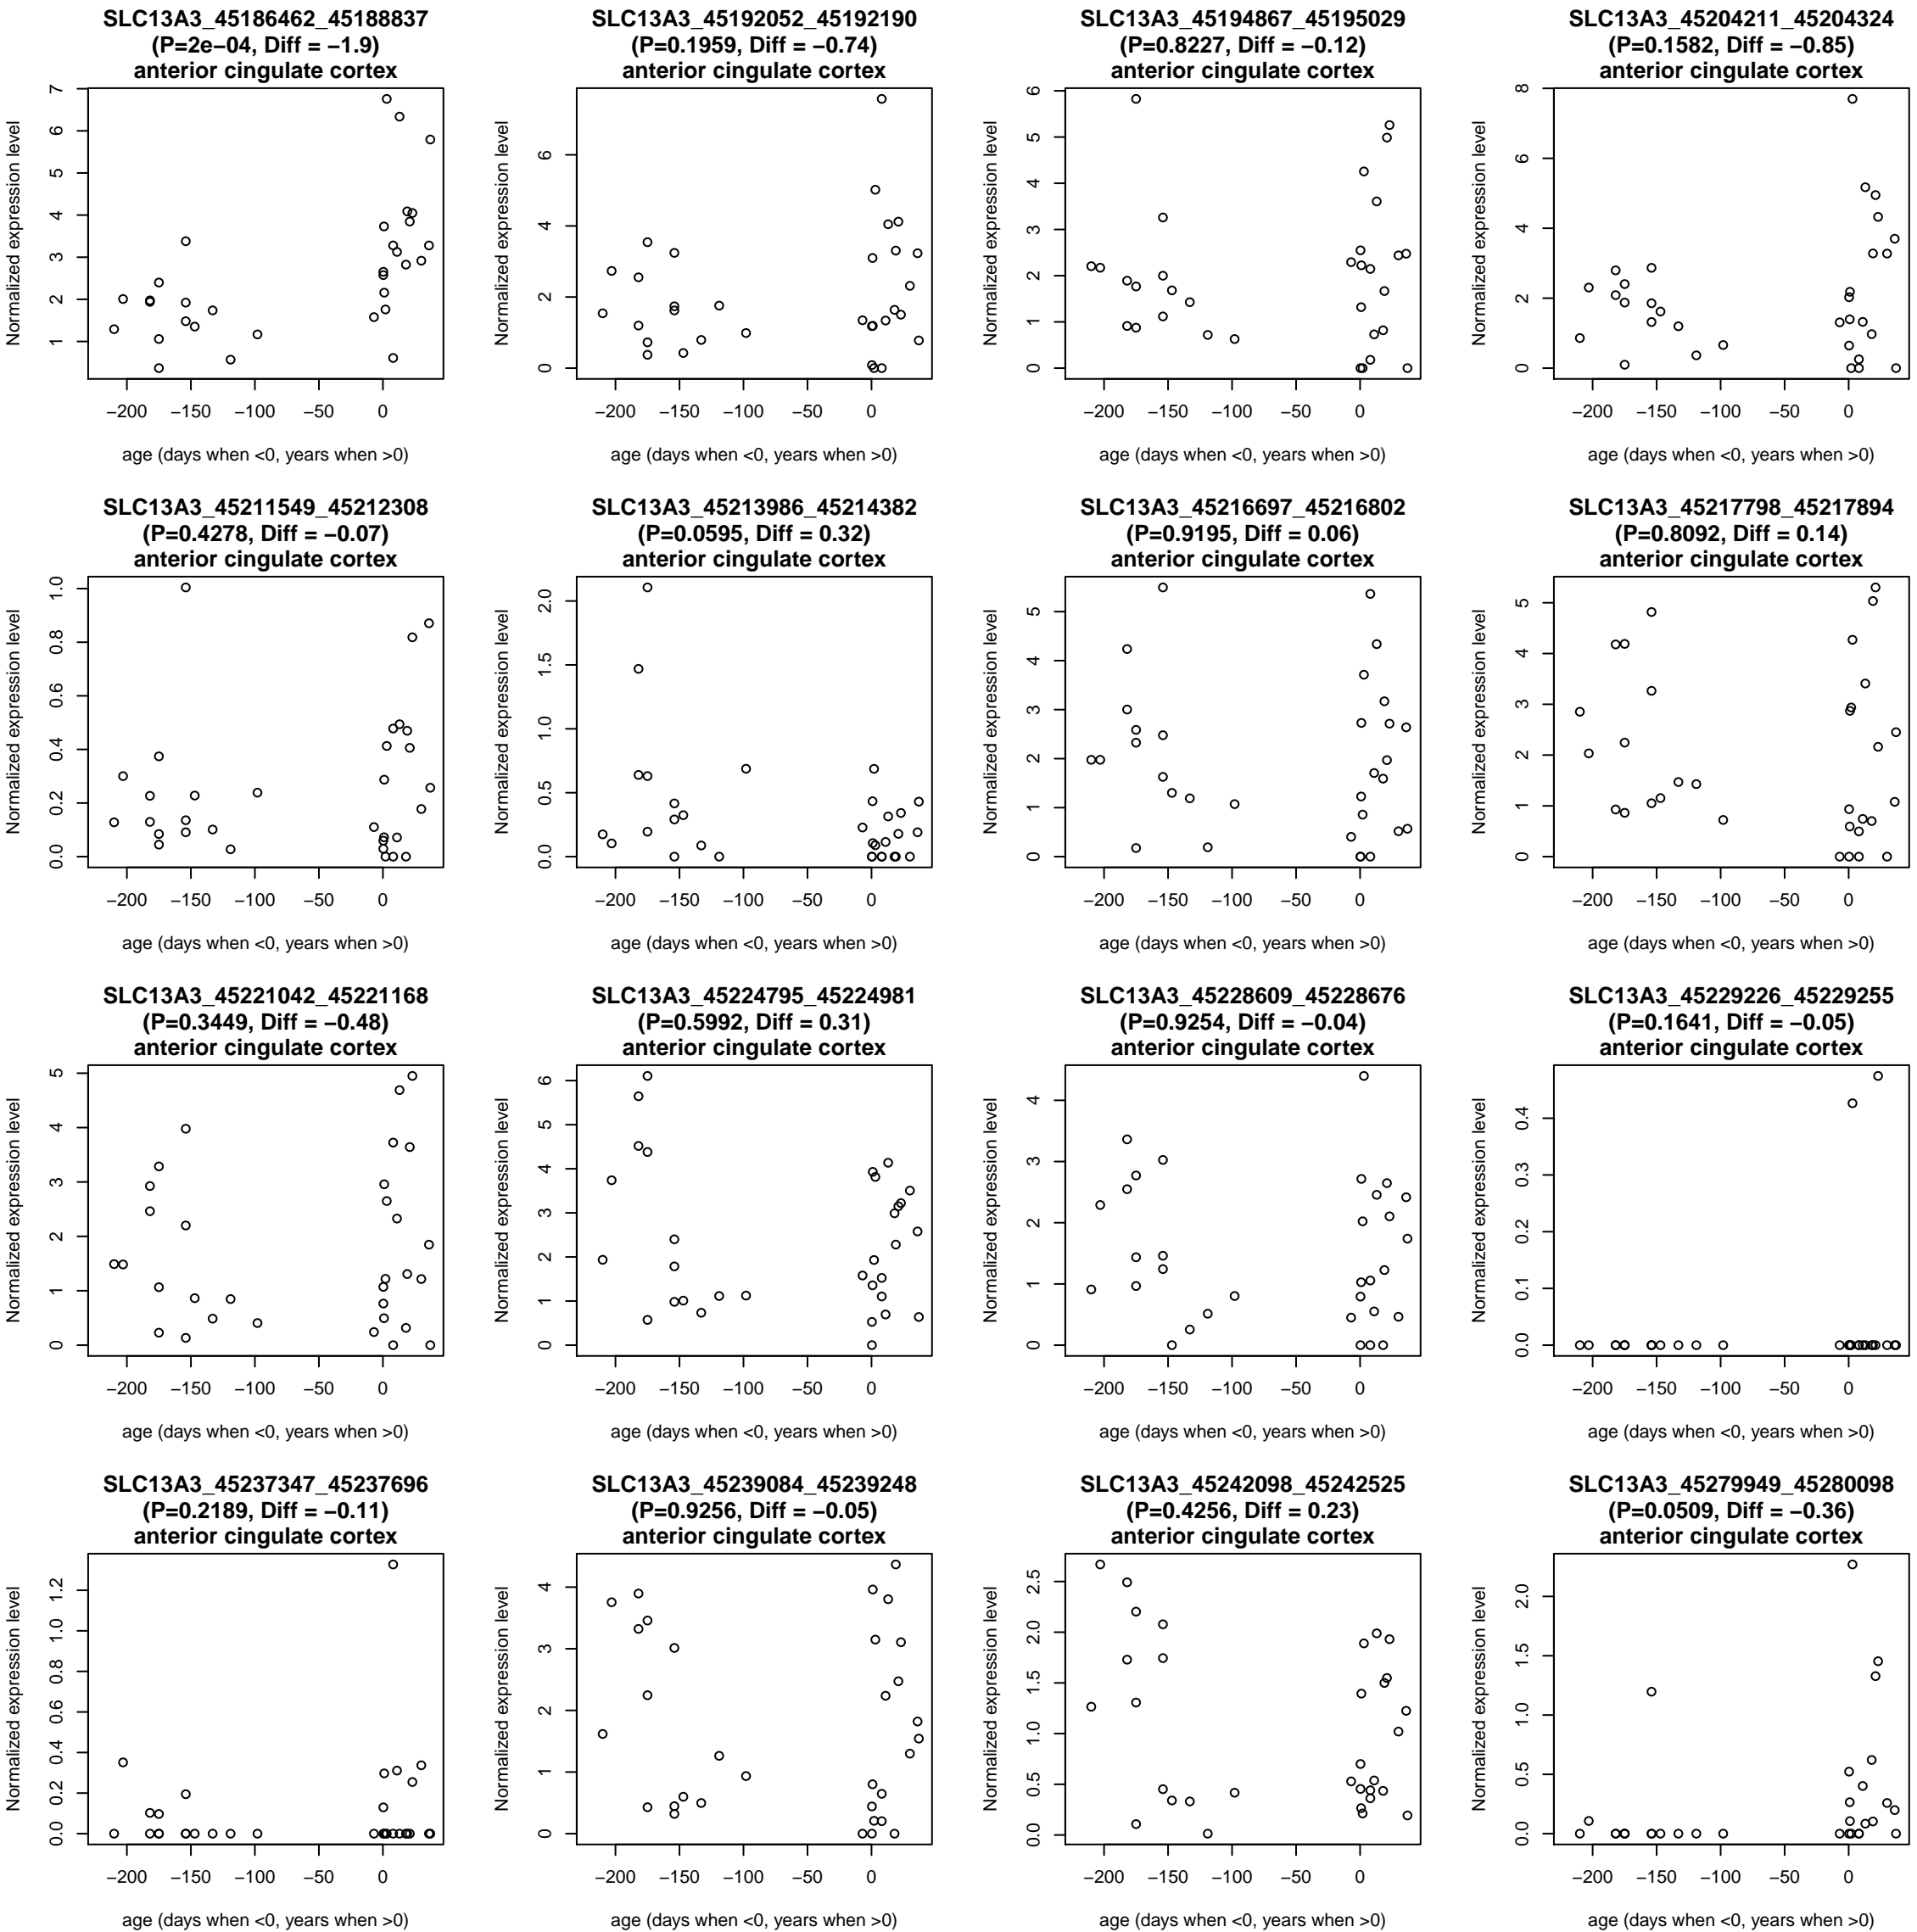



SLC13A3\_45298681\_45298778  
(P=0.0231, Diff = 0.74)  
anterior cingulate cortex

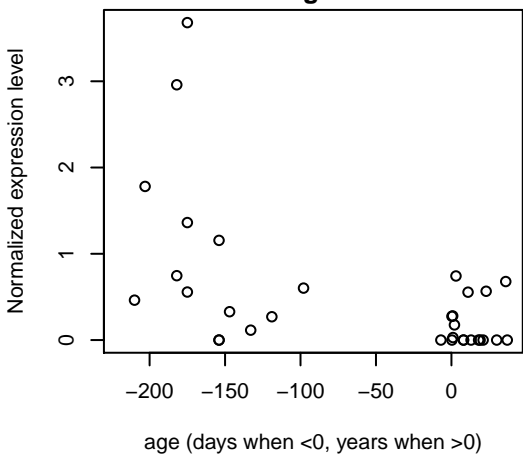

SLC13A3\_45302302\_45302417  
(P=0.2962, Diff = -0.11)  
anterior cingulate cortex

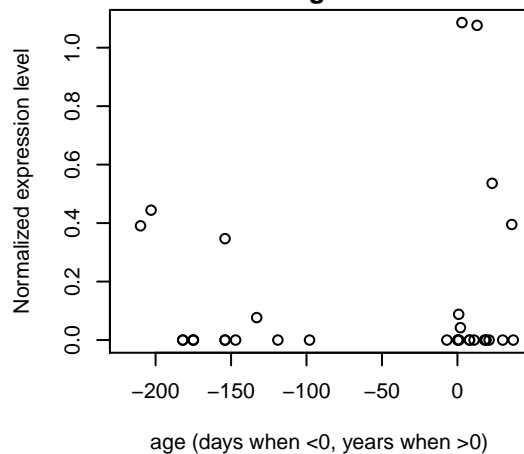

SLC13A3\_45304585\_45304714  
(P=0.2957, Diff = -0.22)  
anterior cingulate cortex

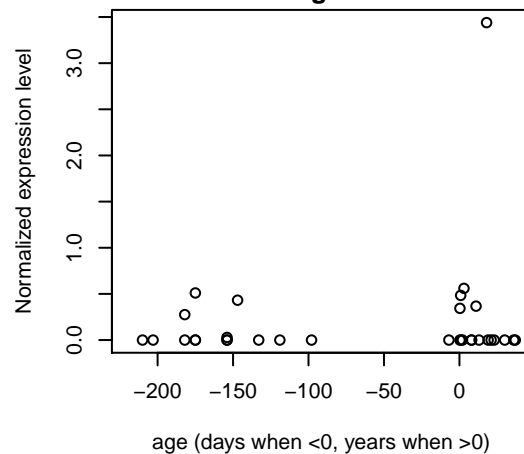

HTR1B\_78171947\_78173490  
(P=0.0016, Diff = -0.55)  
anterior cingulate cortex

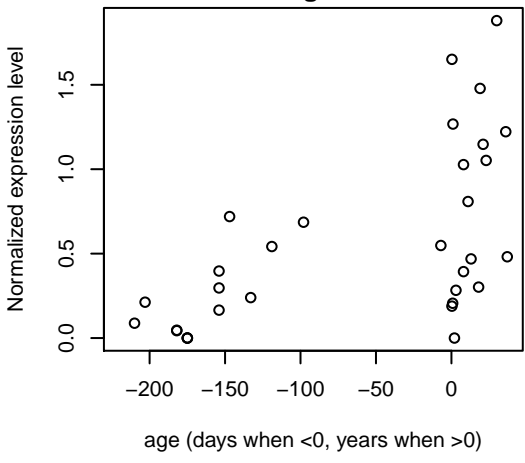

**MYOM1\_3066804\_3067553**  
( $P=6e-04$ , Diff = -2.43)  
anterior cingulate cortex

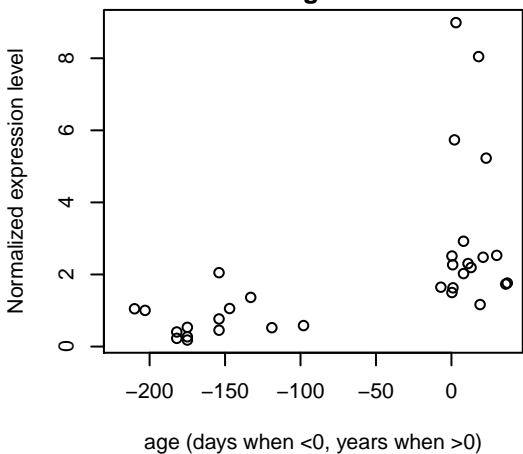

**MYOM1\_3071831\_3071887**  
( $P=0.0019$ , Diff = -1.89)  
anterior cingulate cortex

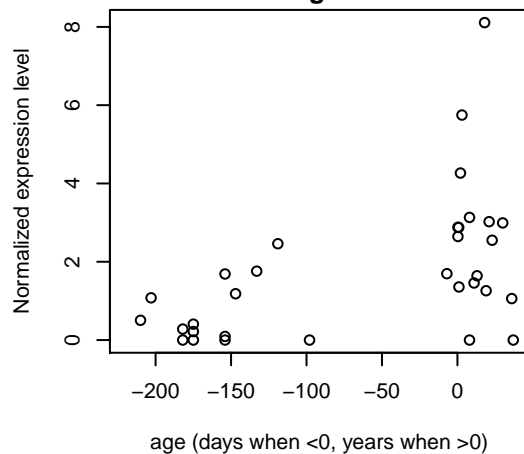

**MYOM1\_3075451\_3075474**  
( $P=0.0128$ , Diff = -2.45)  
anterior cingulate cortex

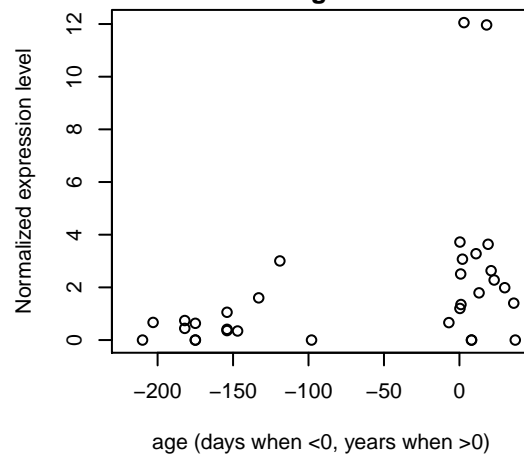

**MYOM1\_3075615\_3075638**  
( $P=0.3322$ , Diff = -0.09)  
anterior cingulate cortex

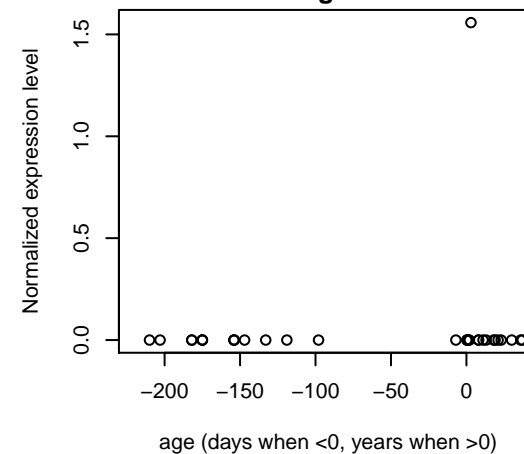

**MYOM1\_3075722\_3075759**  
( $P=0.0141$ , Diff = -3.31)  
anterior cingulate cortex

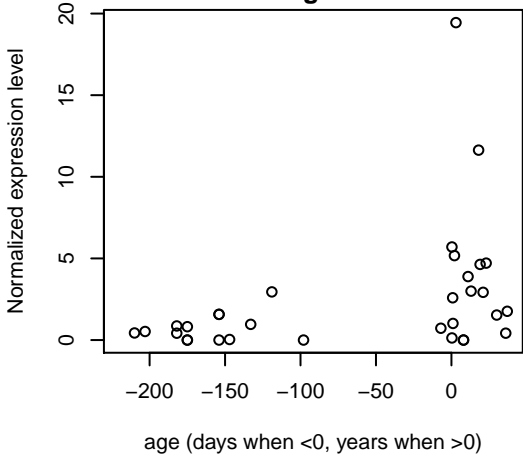

**MYOM1\_3079176\_3079340**  
( $P=0.0048$ , Diff = -2.55)  
anterior cingulate cortex

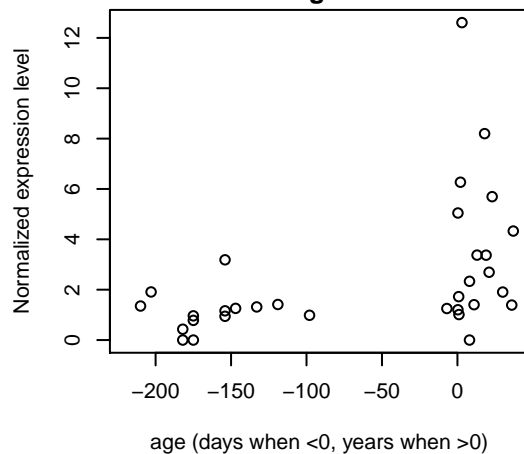

**MYOM1\_3083786\_3083892**  
( $P=0.0259$ , Diff = -1.95)  
anterior cingulate cortex

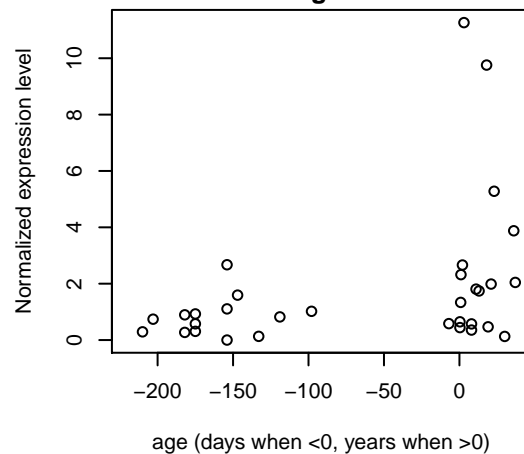

**MYOM1\_3083986\_3084025**  
( $P=0.0337$ , Diff = -2.68)  
anterior cingulate cortex

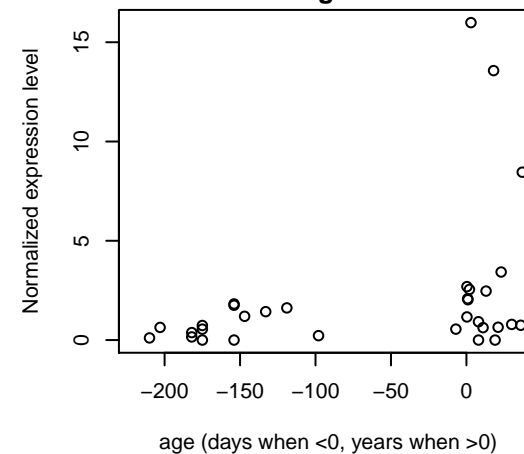

**MYOM1\_3085042\_3085130**  
( $P=0.0082$ , Diff = -2.69)  
anterior cingulate cortex

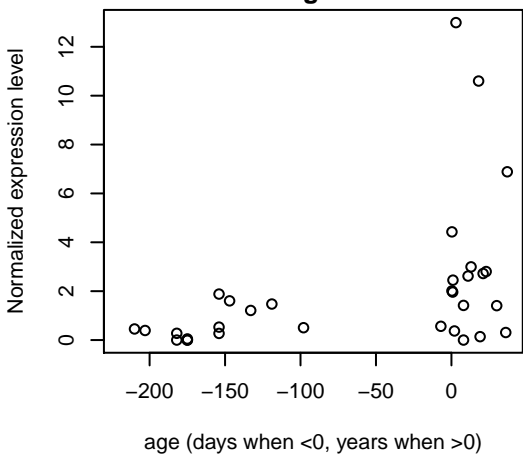

**MYOM1\_3086035\_3086149**  
( $P=0.0025$ , Diff = -2.34)  
anterior cingulate cortex

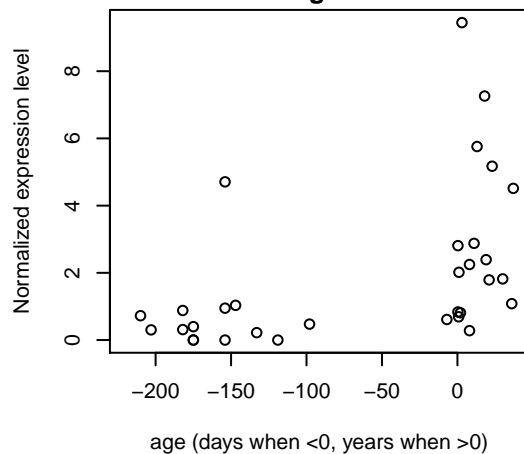

**MYOM1\_3089171\_3089239**  
( $P=0.0025$ , Diff = -2.48)  
anterior cingulate cortex

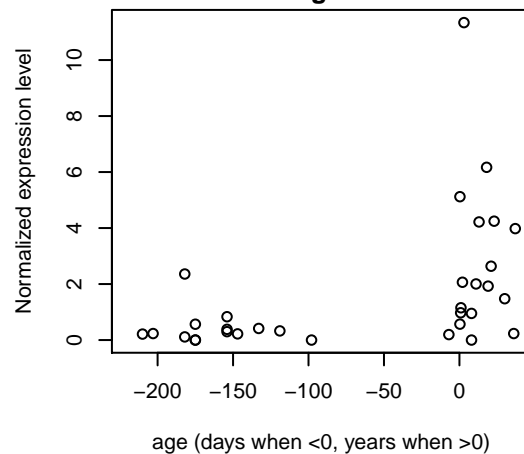

**MYOM1\_3089534\_3089594**  
( $P=0.0209$ , Diff = -1.64)  
anterior cingulate cortex

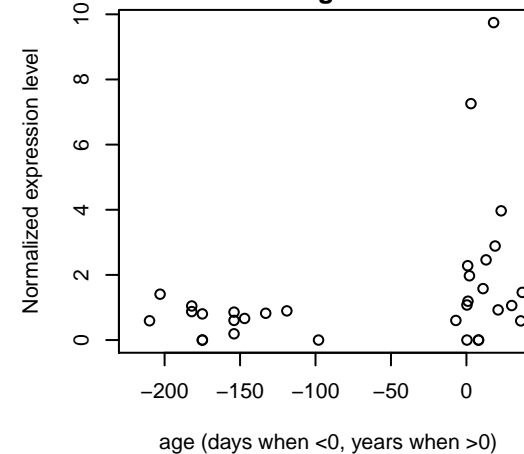

**MYOM1\_3090655\_3090800**  
( $P=0.0027$ , Diff = -1.88)  
anterior cingulate cortex

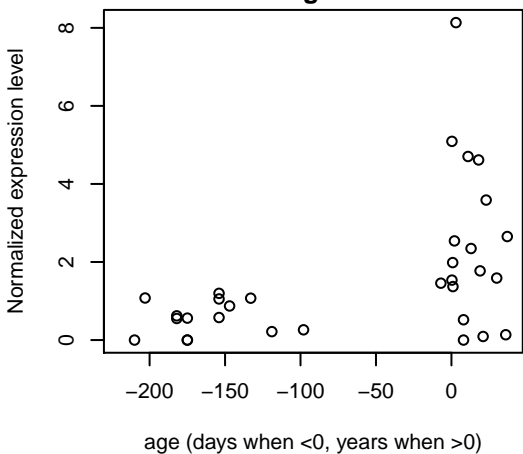

**MYOM1\_3094167\_3094304**  
( $P=0.0017$ , Diff = -1.88)  
anterior cingulate cortex

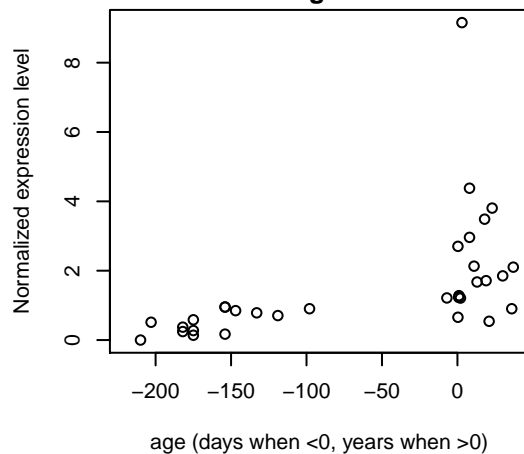

**MYOM1\_3100156\_3100201**  
( $P=0.0058$ , Diff = -1.44)  
anterior cingulate cortex

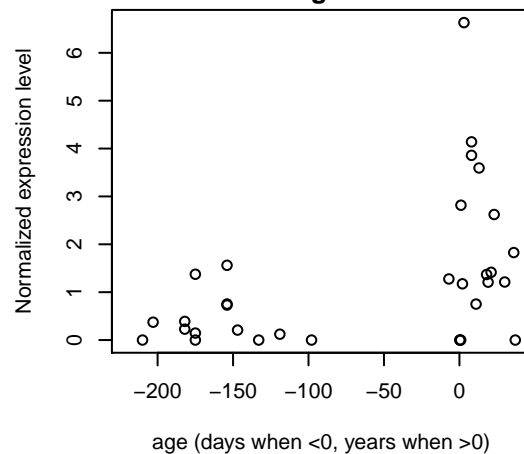

**MYOM1\_3100317\_3100424**  
( $P=0.0151$ , Diff = -1.32)  
anterior cingulate cortex

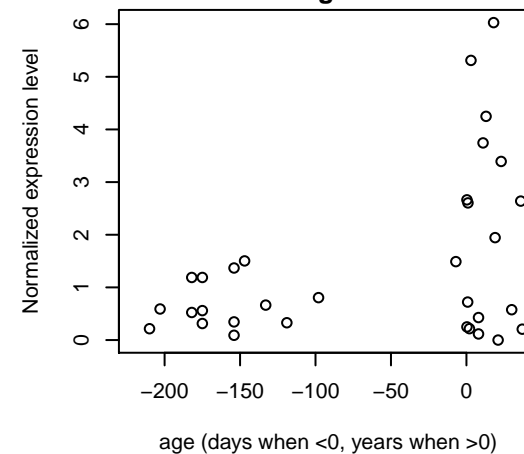

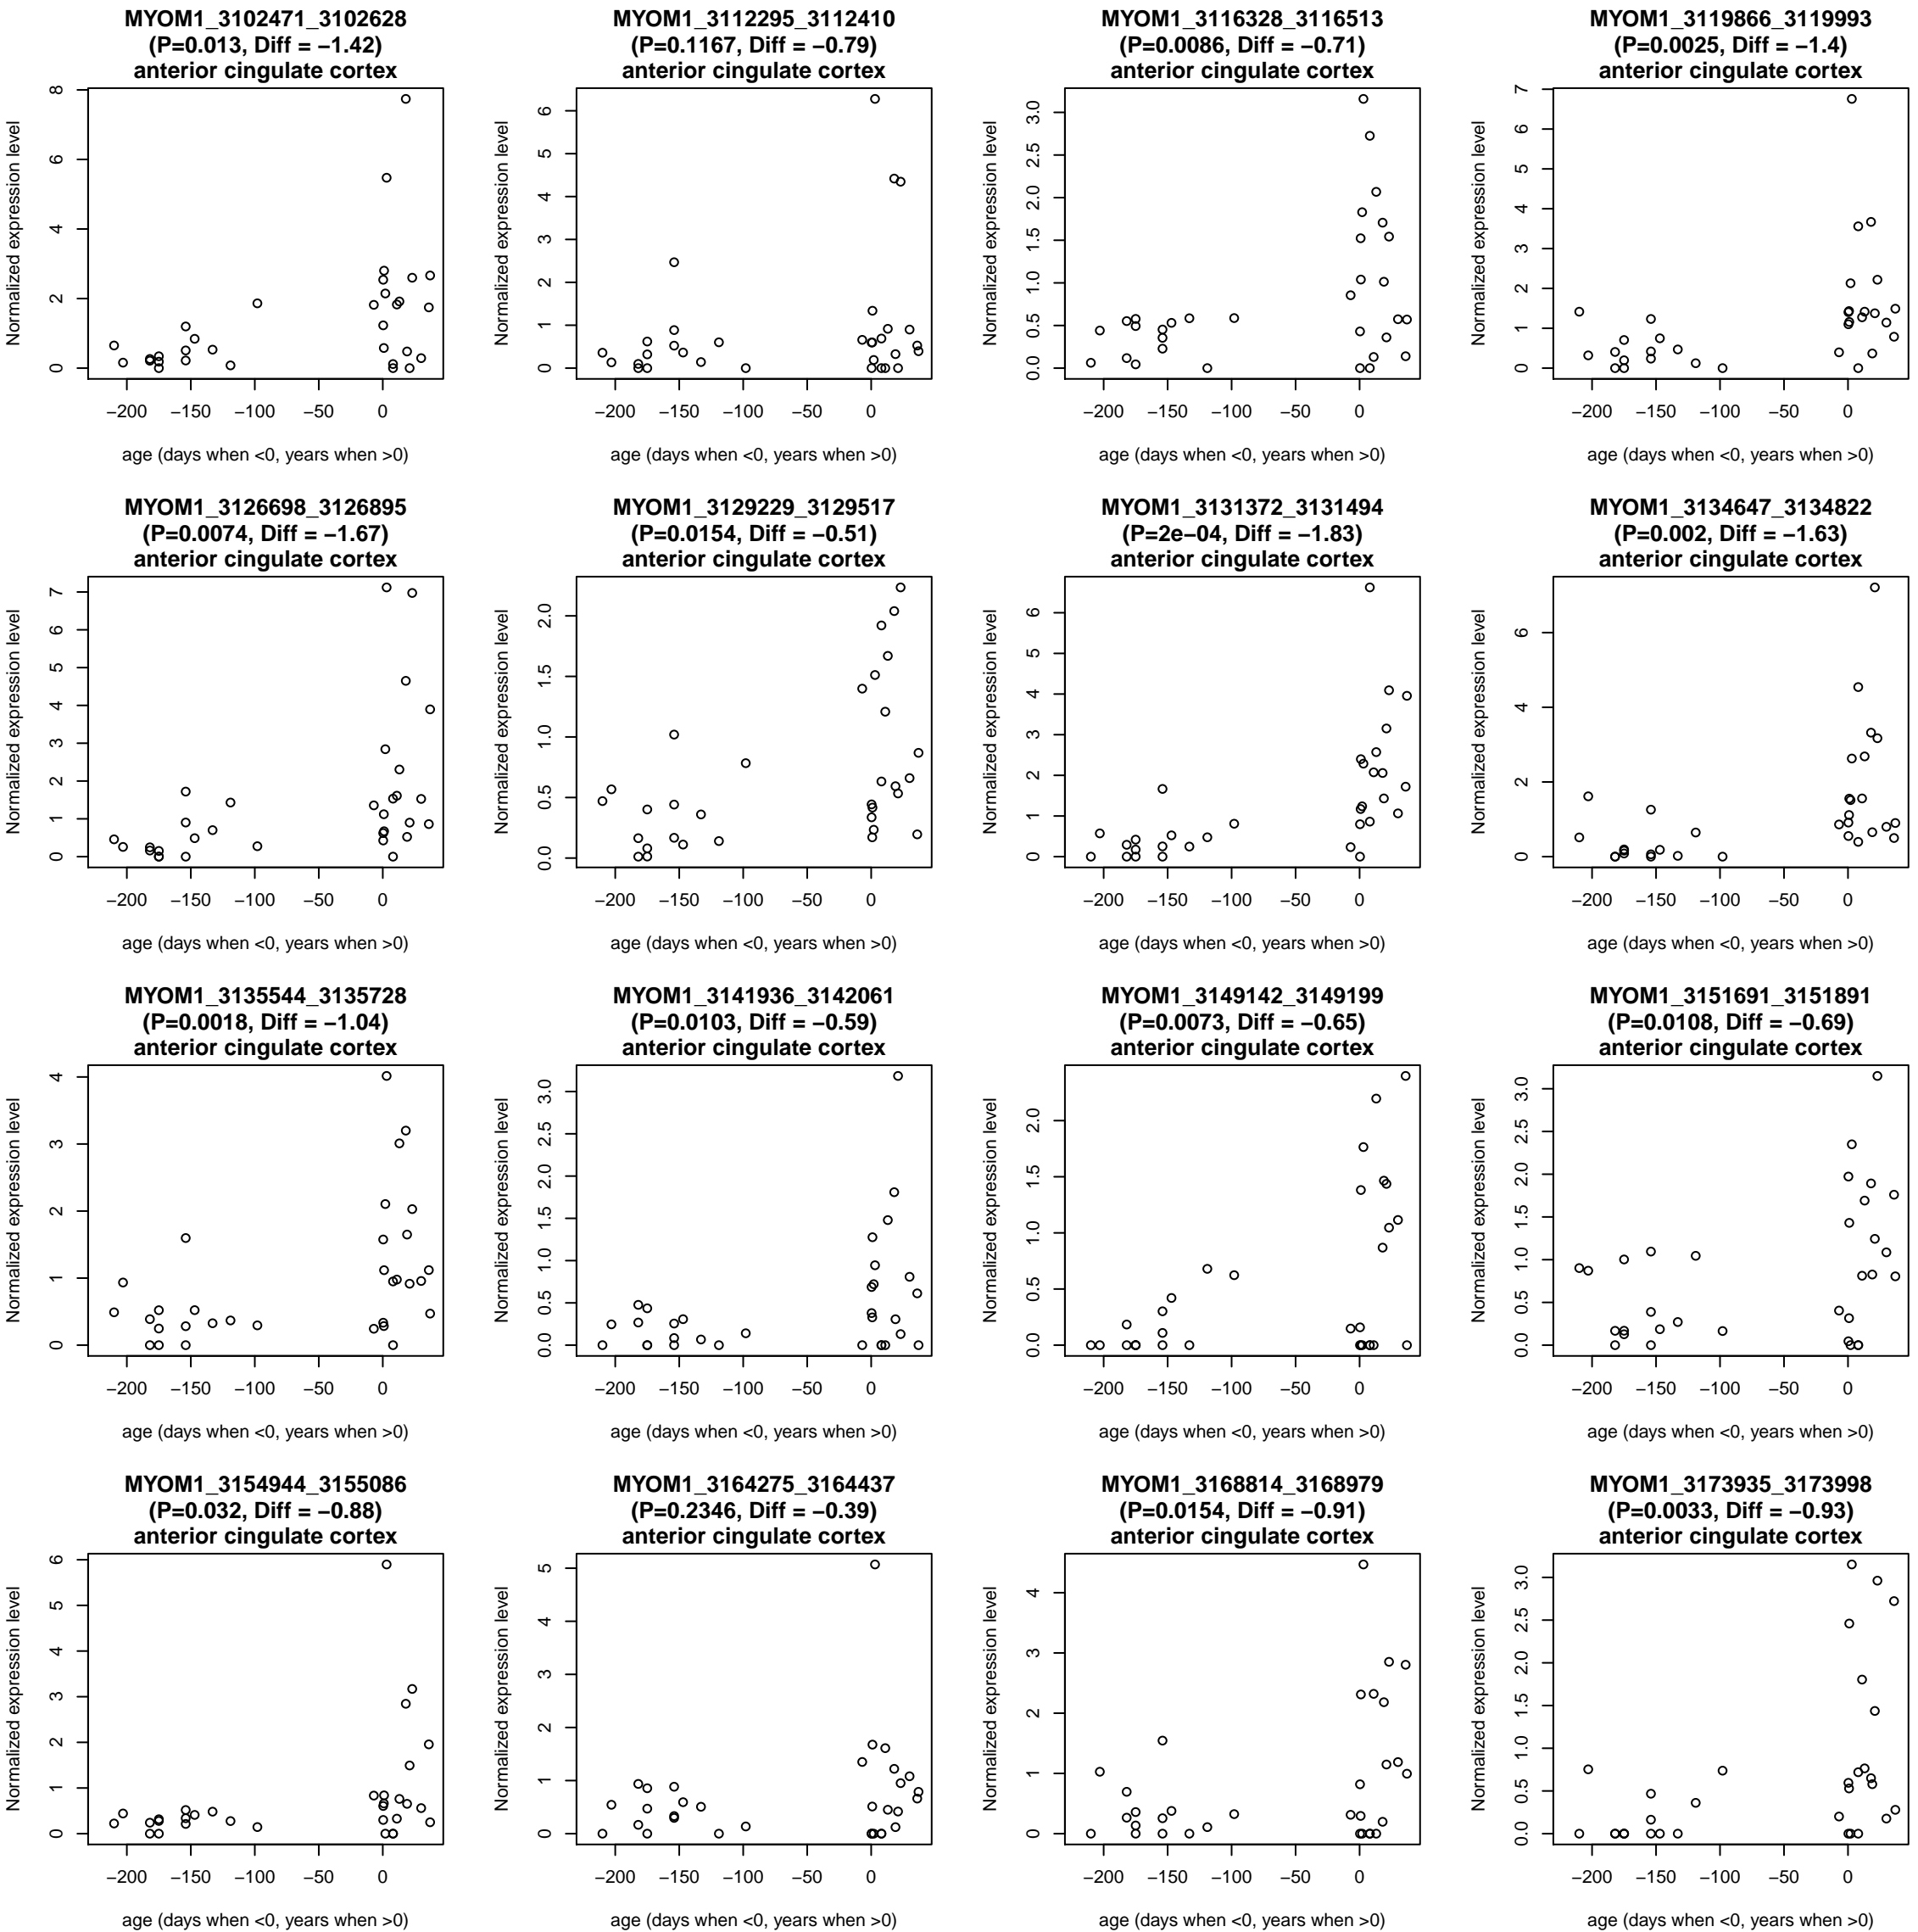

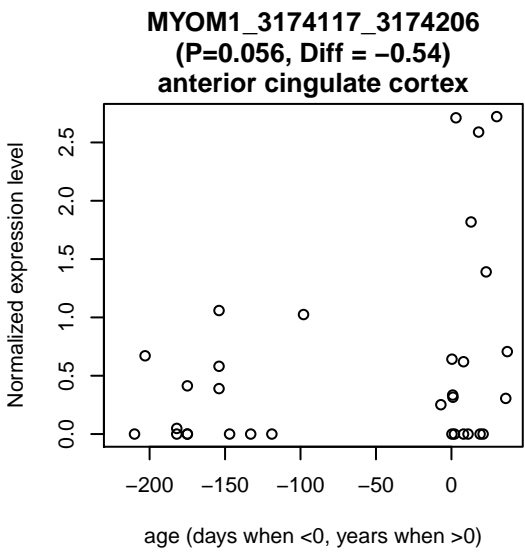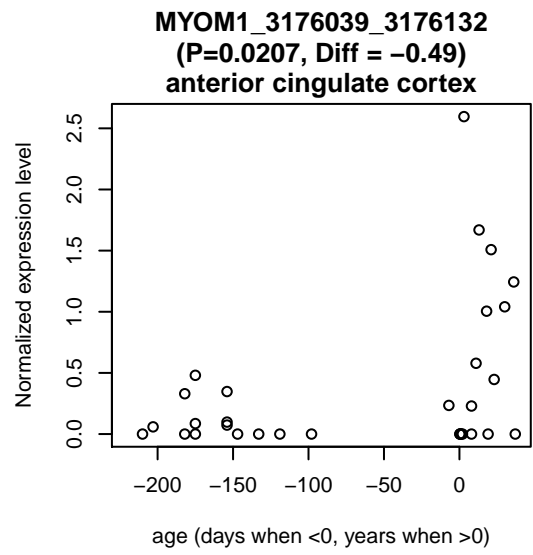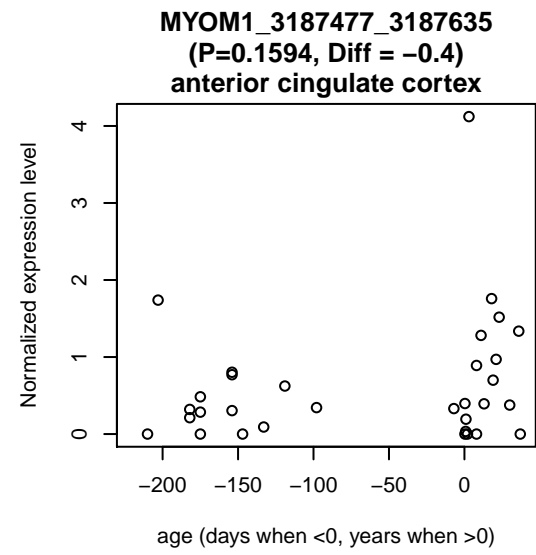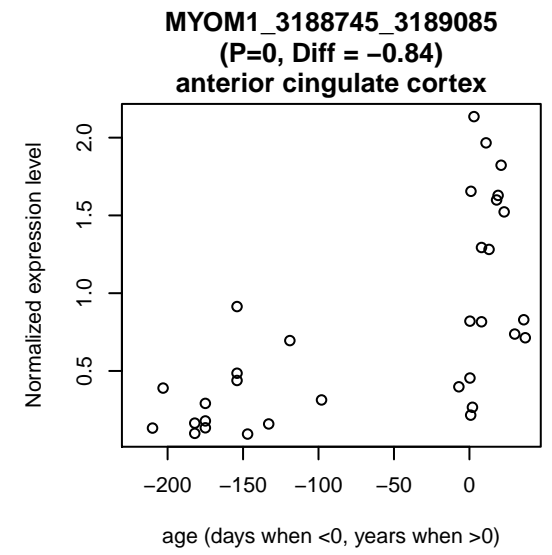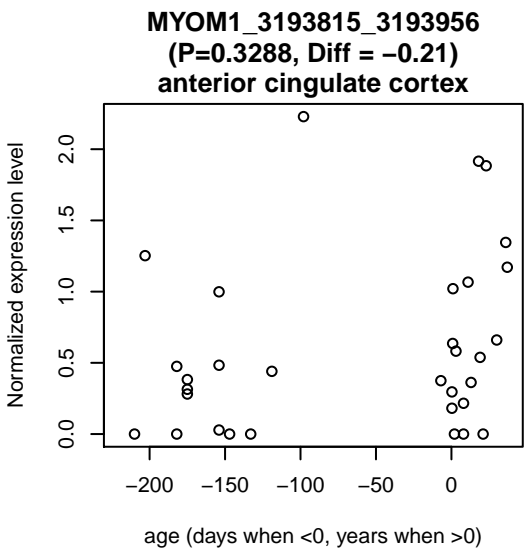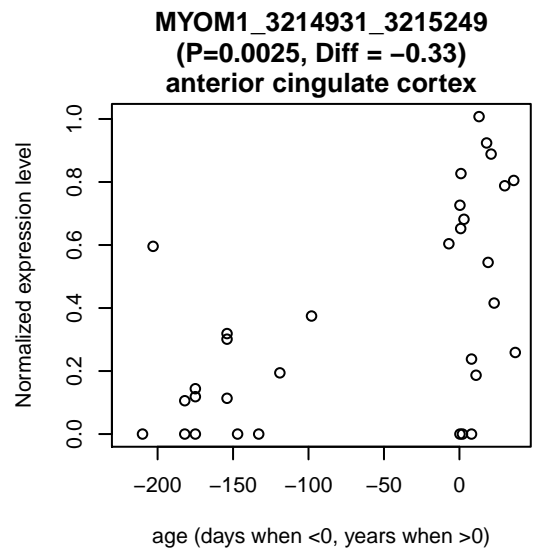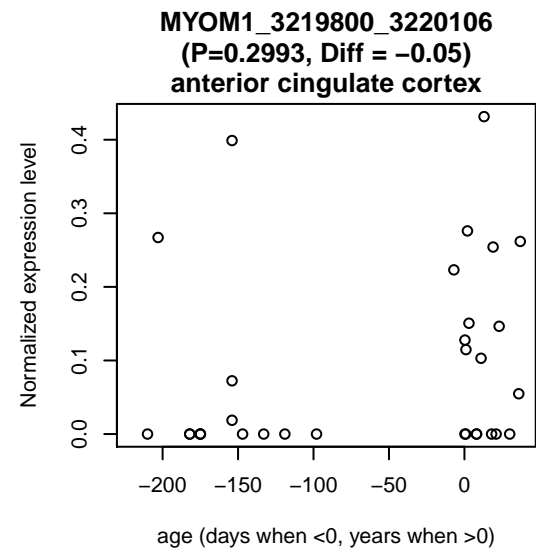

**USP44\_95910335\_95912129**  
(P=0.1048, Diff = 0.55)  
anterior cingulate cortex

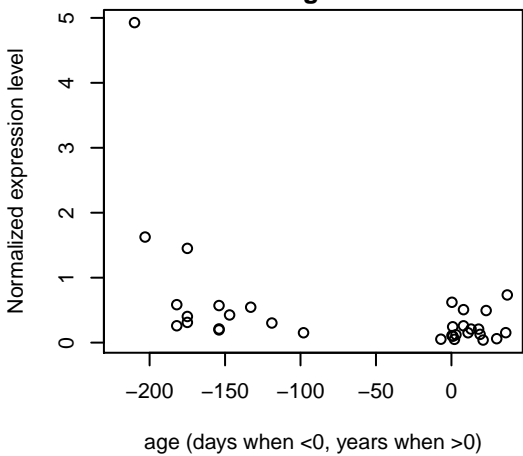

**USP44\_95914772\_95914978**  
(P=0.0419, Diff = 0.72)  
anterior cingulate cortex

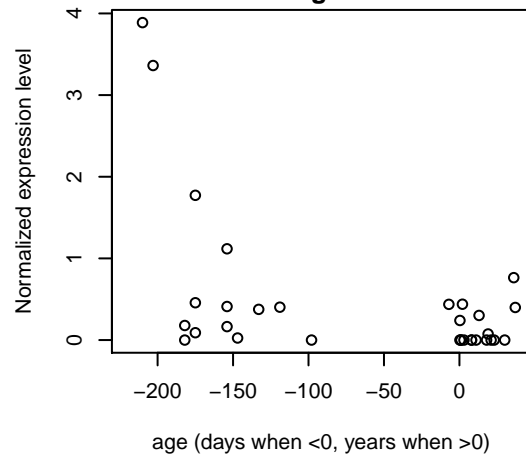

**USP44\_95918295\_95918564**  
(P=0.0909, Diff = 0.2)  
anterior cingulate cortex

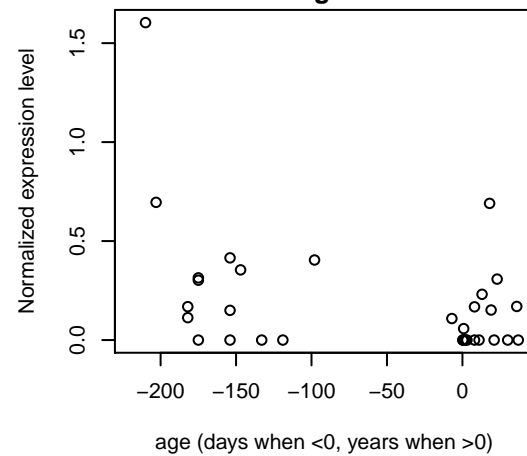

**USP44\_95922582\_95922778**  
(P=0.0723, Diff = 0.52)  
anterior cingulate cortex

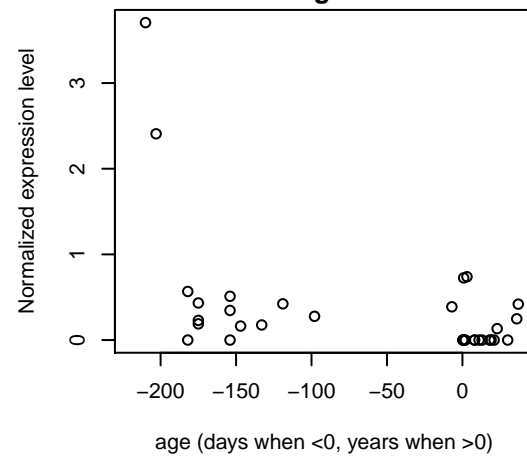

**USP44\_95926604\_95928102**  
(P=0.0961, Diff = 0.59)  
anterior cingulate cortex

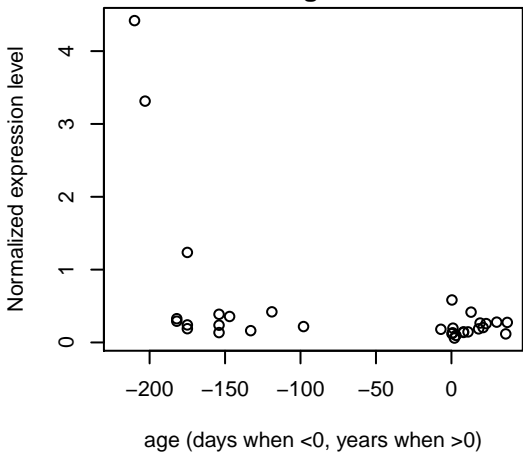

**USP44\_95929148\_95929202**  
(P=NaN, Diff = 0)  
anterior cingulate cortex

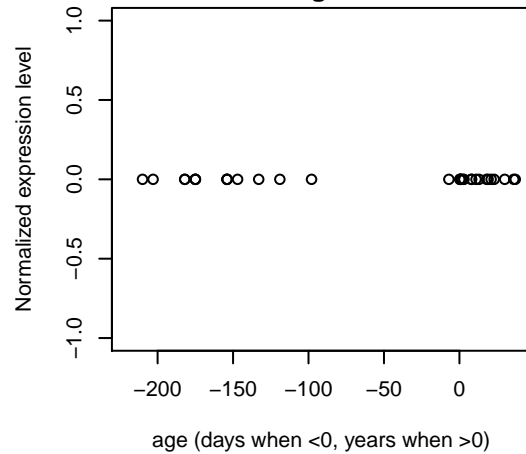

**USP44\_95940225\_95940766**  
(P=0.61, Diff = -0.02)  
anterior cingulate cortex

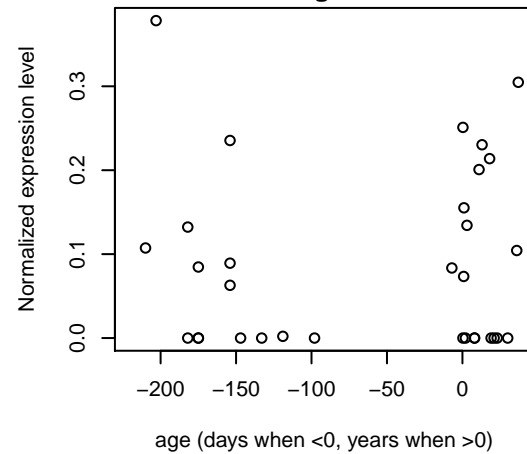

**USP44\_95941758\_95942048**  
(P=0.663, Diff = -0.01)  
anterior cingulate cortex

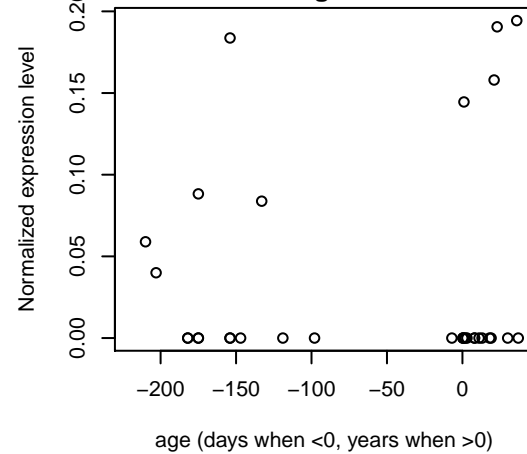

**USP44\_95942301\_95942620**  
(P=0.2493, Diff = 0.16)  
anterior cingulate cortex

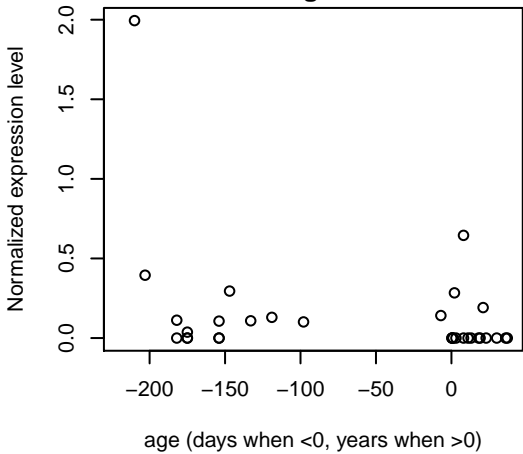

**USP44\_95945047\_95945266**  
(P=NaN, Diff = 0)  
anterior cingulate cortex

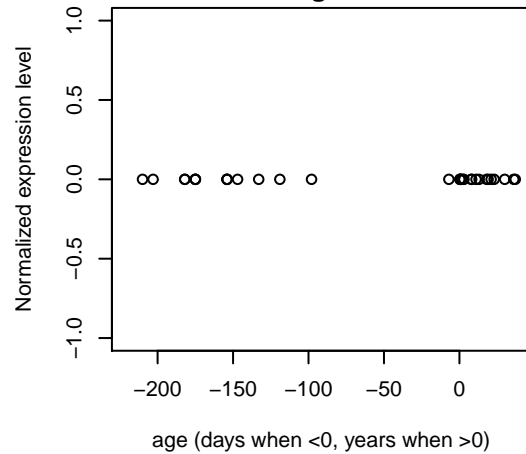

**IGFBP7\_57896938\_57897502**  
(P=0.2992, Diff = -9.73)  
anterior cingulate cortex

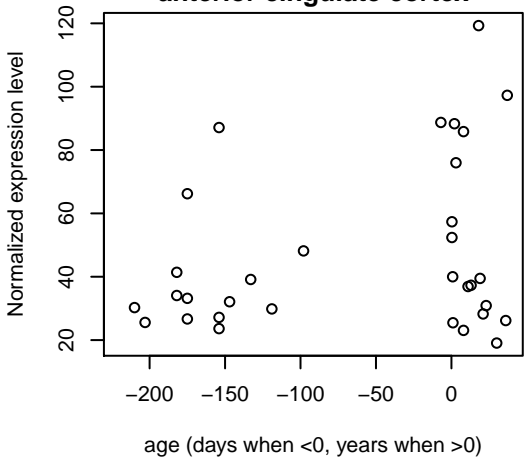

**IGFBP7\_57898203\_57898718**  
(P=0.0447, Diff = -23.53)  
anterior cingulate cortex

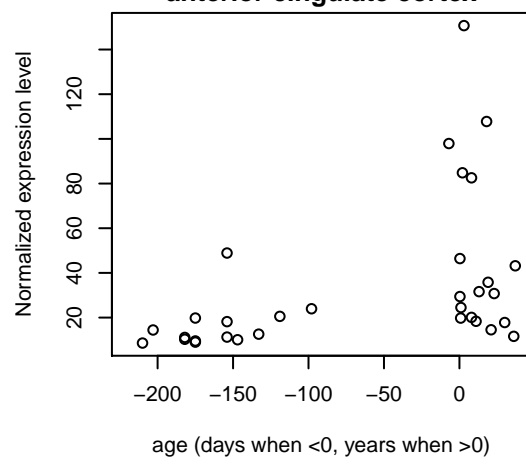

**IGFBP7\_57899360\_57899477**  
(P=0.1506, Diff = -64.3)  
anterior cingulate cortex

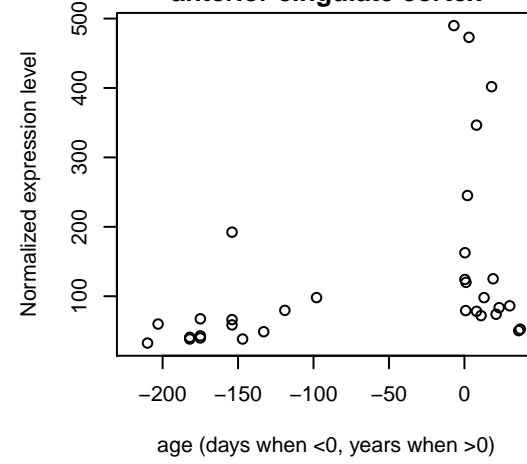

**IGFBP7\_57906989\_57907099**  
(P=0.1397, Diff = -59.91)  
anterior cingulate cortex

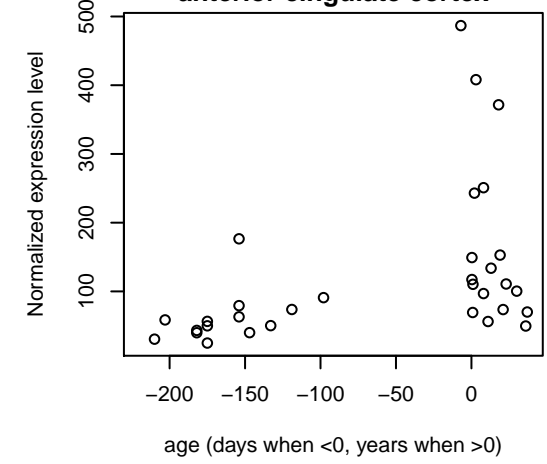

**IGFBP7\_57976042\_57976551**  
(P=0.4899, Diff = -8.93)  
anterior cingulate cortex

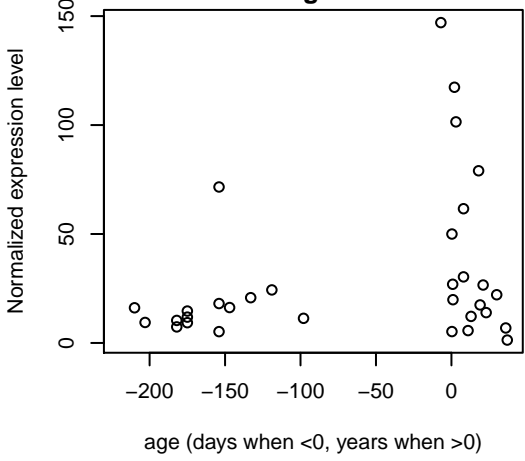

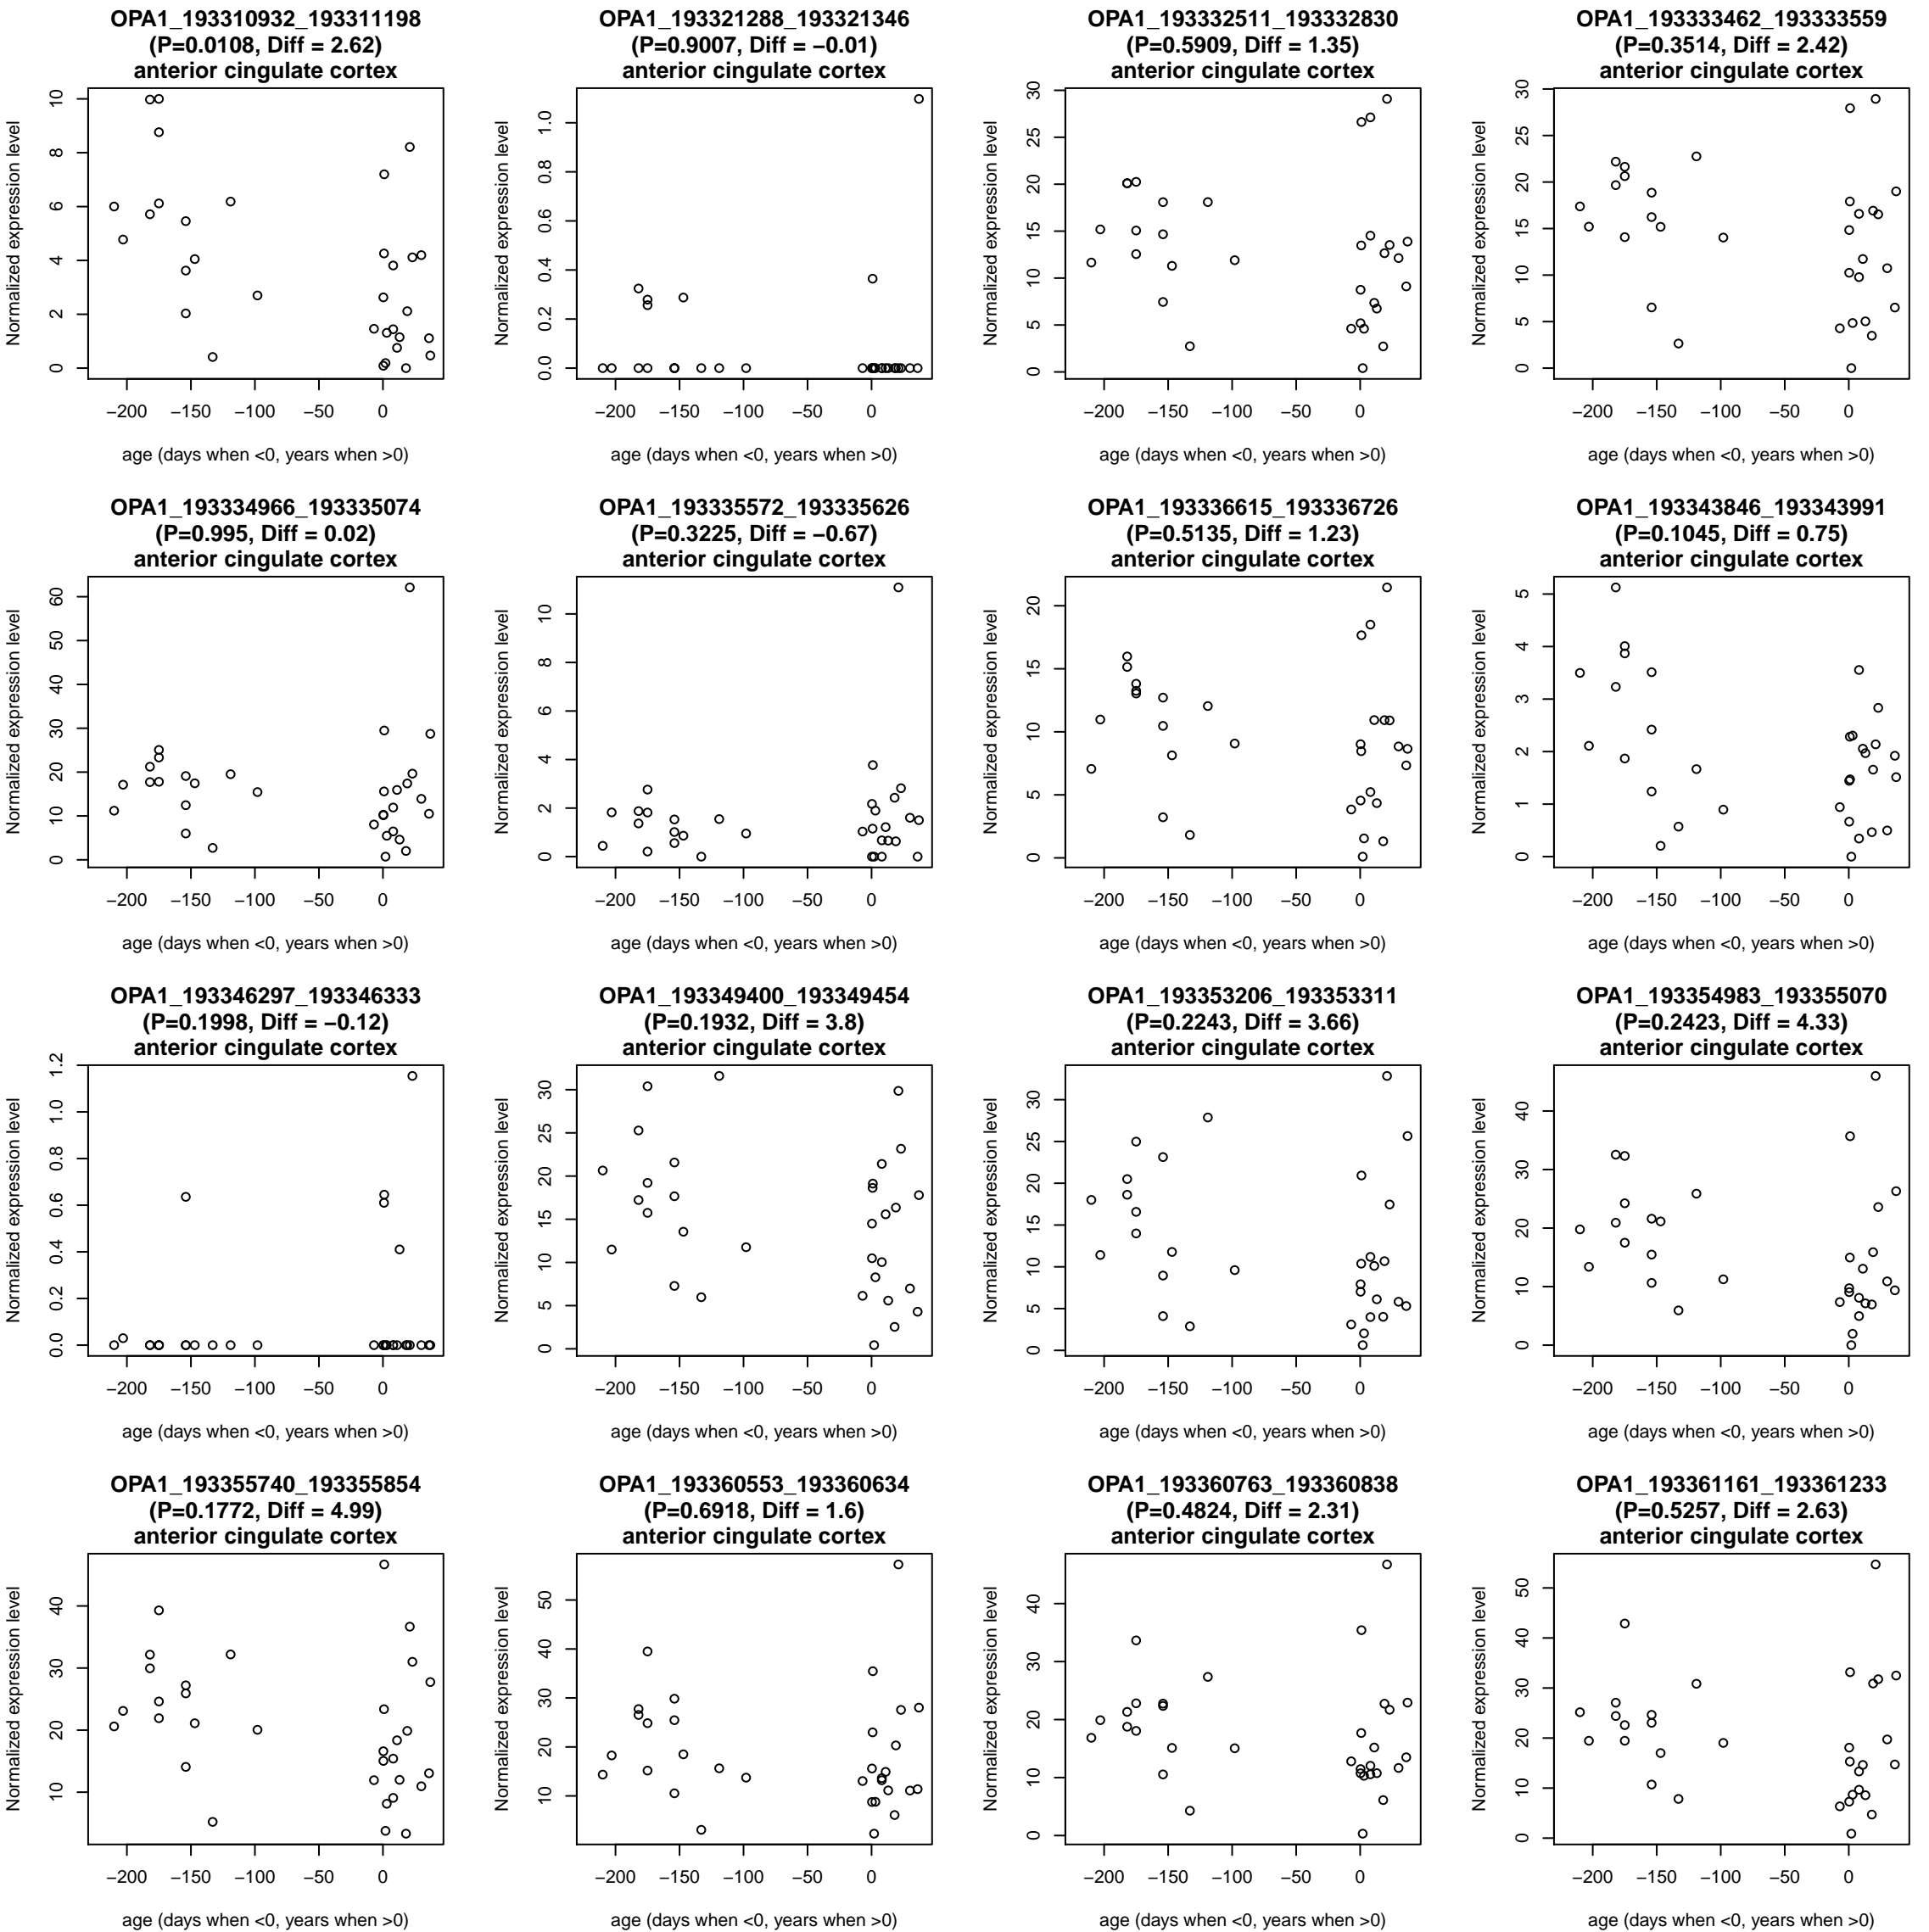



**OPA1\_193361316\_193361416**  
**(P=0.5948, Diff = 2)**  
**anterior cingulate cortex**

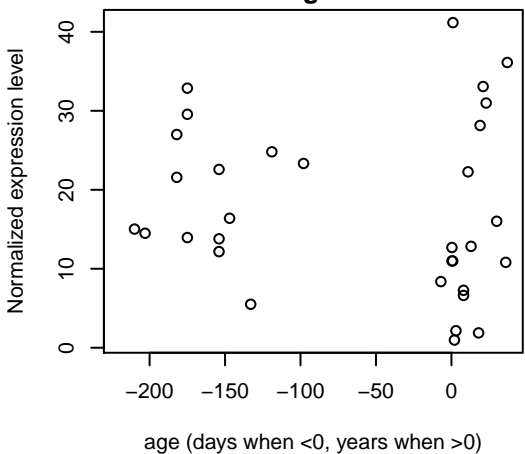

**OPA1\_193361763\_193361940**  
**(P=0.3498, Diff = 2.25)**  
**anterior cingulate cortex**

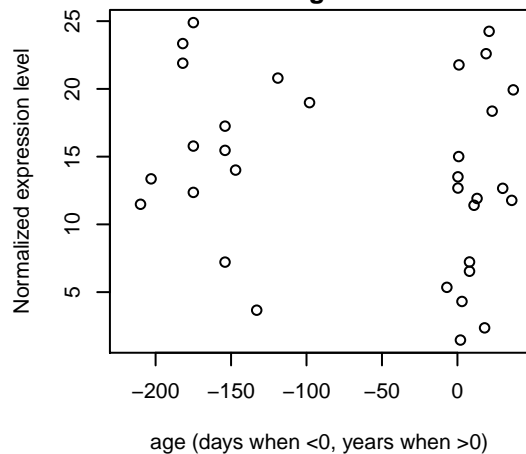

**OPA1\_193363341\_193363414**  
**(P=0.3501, Diff = 3.19)**  
**anterior cingulate cortex**

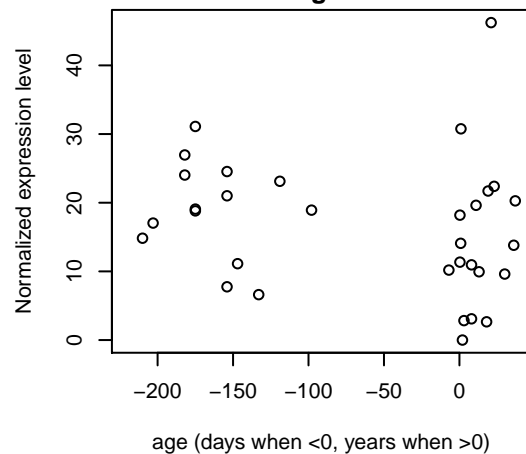

**OPA1\_193363516\_193363589**  
**(P=0.2861, Diff = 3.61)**  
**anterior cingulate cortex**

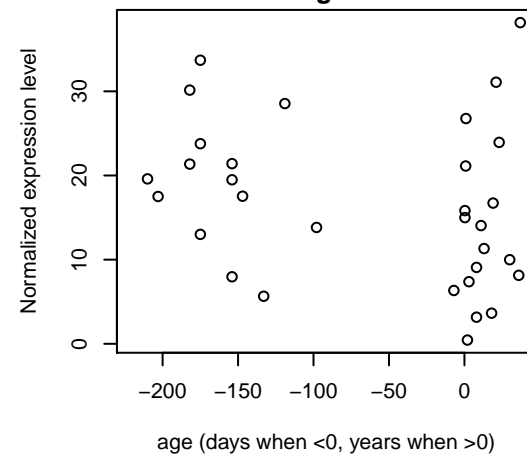

**OPA1\_193364853\_193364969**  
**(P=0.7496, Diff = 1.12)**  
**anterior cingulate cortex**

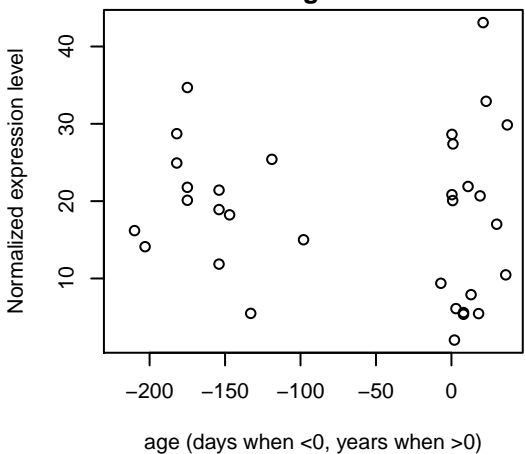

**OPA1\_193365858\_193366249**  
**(P=0.5602, Diff = 0.33)**  
**anterior cingulate cortex**

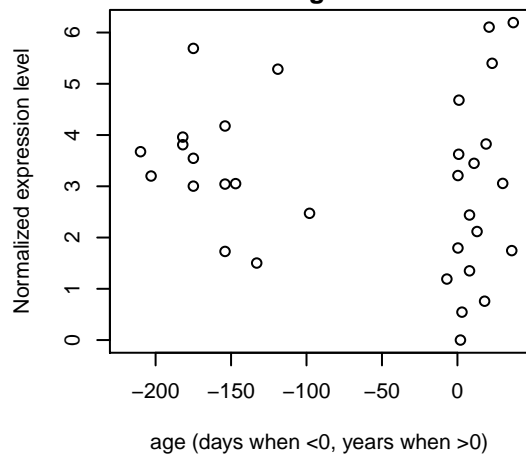

**OPA1\_193366554\_193366660**  
**(P=0.5972, Diff = -1.7)**  
**anterior cingulate cortex**

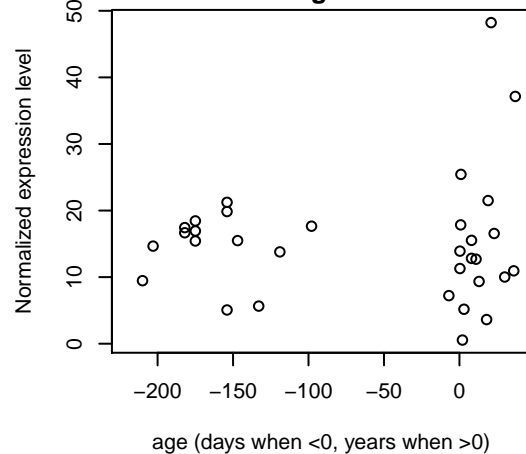

**OPA1\_193372650\_193372816**  
**(P=0.4062, Diff = -4.33)**  
**anterior cingulate cortex**

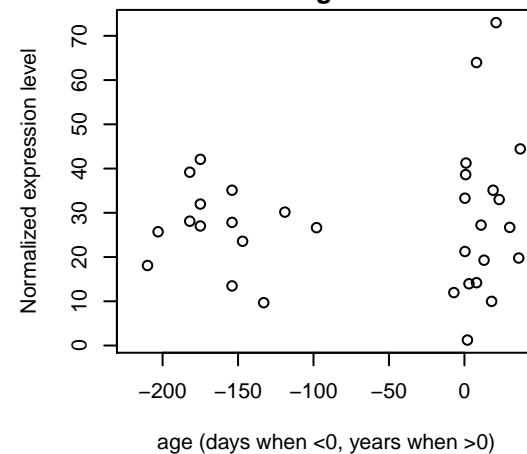

**OPA1\_193374868\_193375021**  
**(P=0.767, Diff = -1.22)**  
**anterior cingulate cortex**

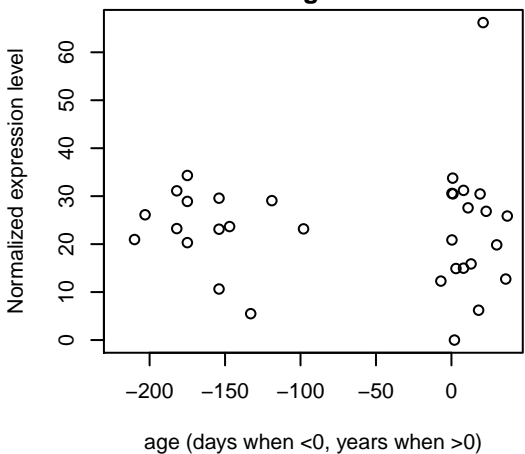

**OPA1\_193376675\_193376784**  
**(P=0.9966, Diff = 0.02)**  
**anterior cingulate cortex**

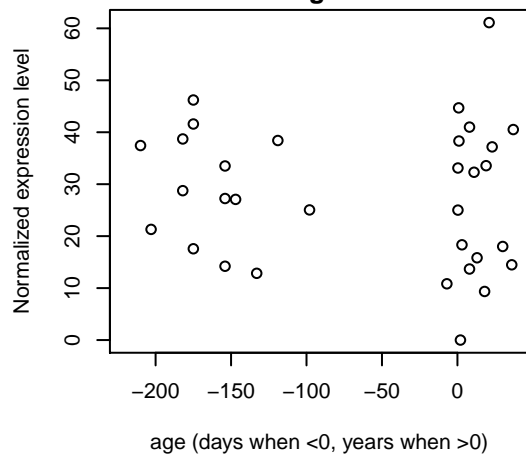

**OPA1\_193377270\_193377350**  
**(P=0.7956, Diff = -1.15)**  
**anterior cingulate cortex**

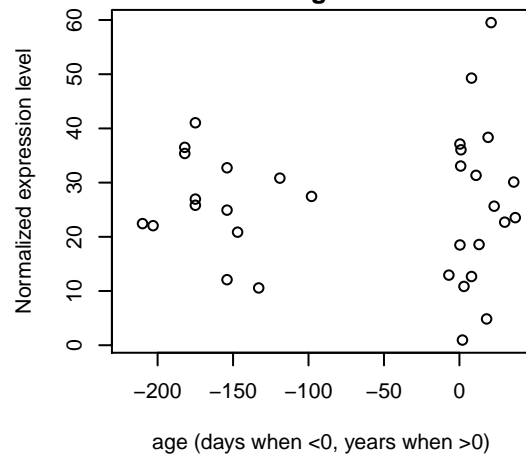

**OPA1\_193380610\_193380751**  
**(P=0.6138, Diff = -3.47)**  
**anterior cingulate cortex**

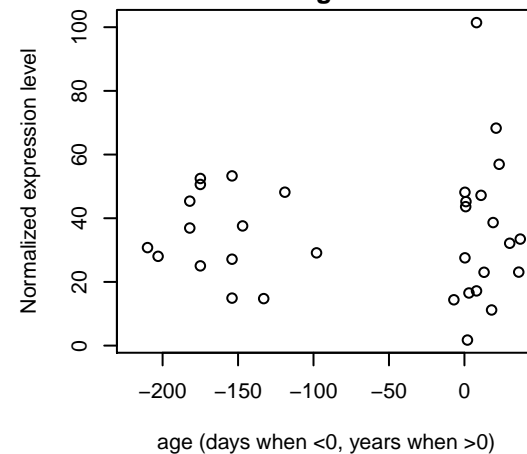

**OPA1\_193382668\_193382785**  
**(P=0.6219, Diff = -2.11)**  
**anterior cingulate cortex**

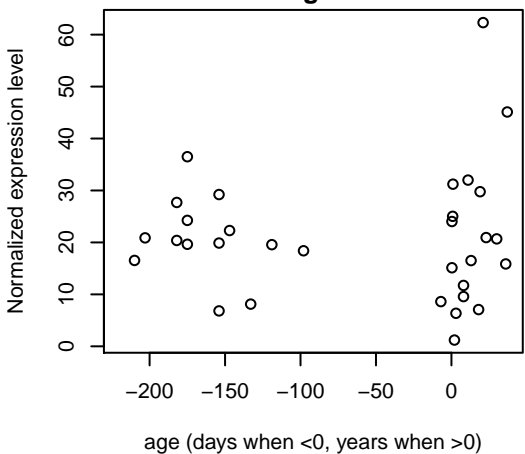

**OPA1\_193384084\_193384178**  
**(P=0.9222, Diff = 0.44)**  
**anterior cingulate cortex**

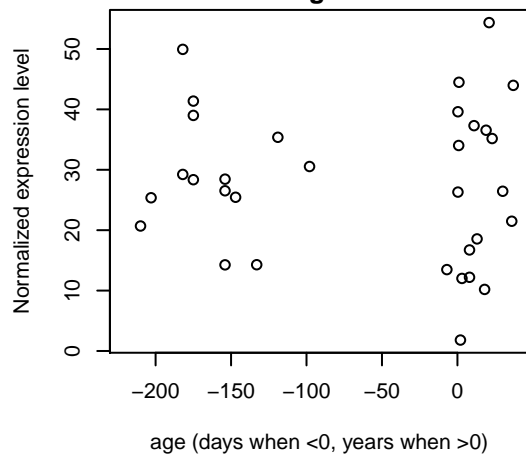

**OPA1\_193384958\_193385069**  
**(P=0.6223, Diff = -2.09)**  
**anterior cingulate cortex**

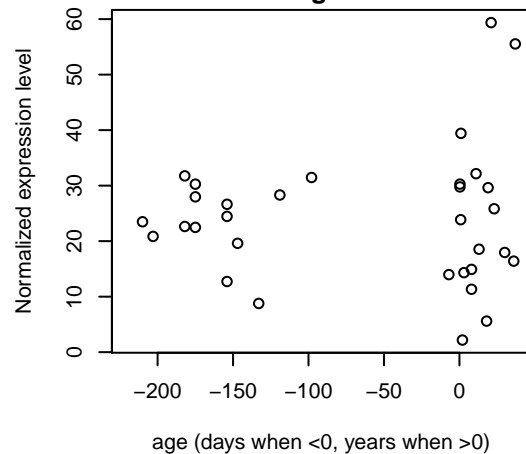

**OPA1\_193385159\_193385244**  
**(P=0.2204, Diff = -0.13)**  
**anterior cingulate cortex**

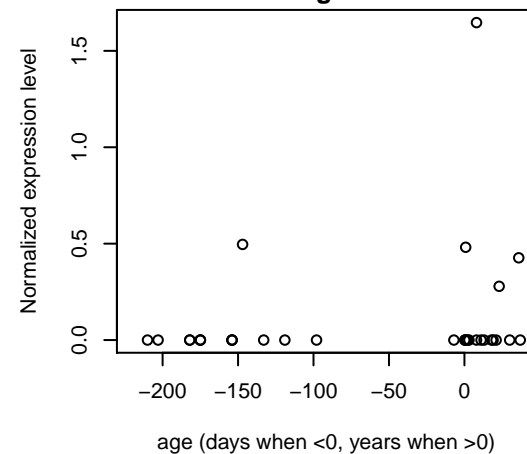

**OPA1\_193386103\_193386720**  
(P=0.7721, Diff = -0.02)  
anterior cingulate cortex

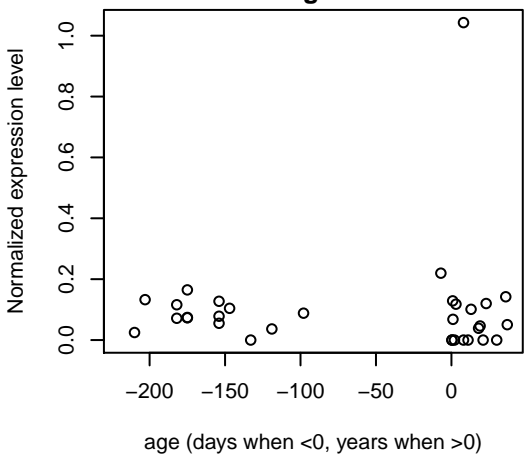

**OPA1\_193409182\_193409921**  
(P=0.7451, Diff = -0.14)  
anterior cingulate cortex

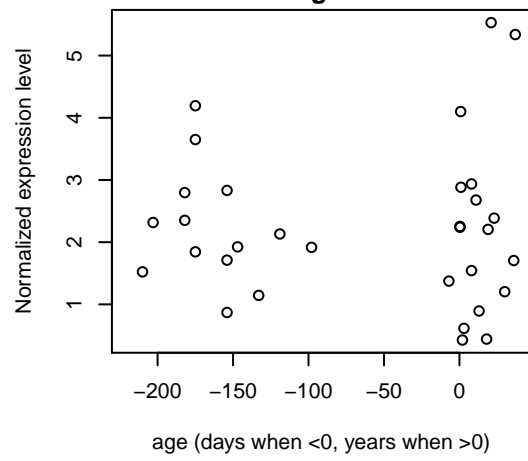

**OPA1\_193412394\_193415612**  
(P=0.108, Diff = -5.06)  
anterior cingulate cortex

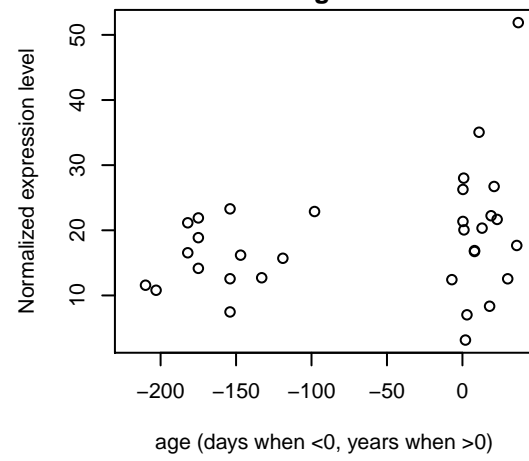

**ZMAT4\_40388108\_40389757**  
(P=0, Diff = -5.42)  
anterior cingulate cortex

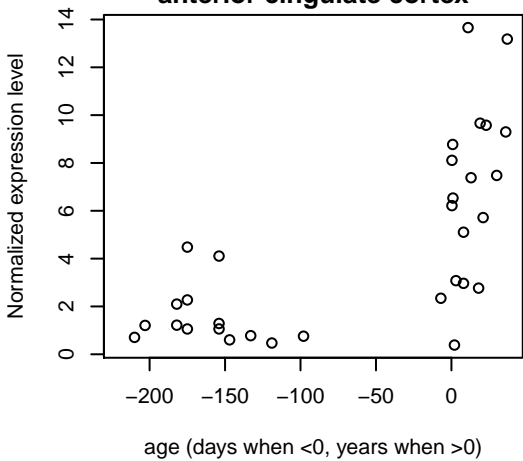

**ZMAT4\_40438683\_40438780**  
(P=2e-04, Diff = -6.11)  
anterior cingulate cortex

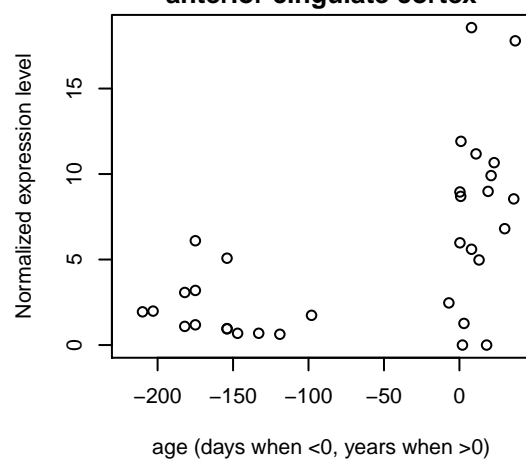

**ZMAT4\_40531882\_40532450**  
(P=1e-04, Diff = -1.55)  
anterior cingulate cortex

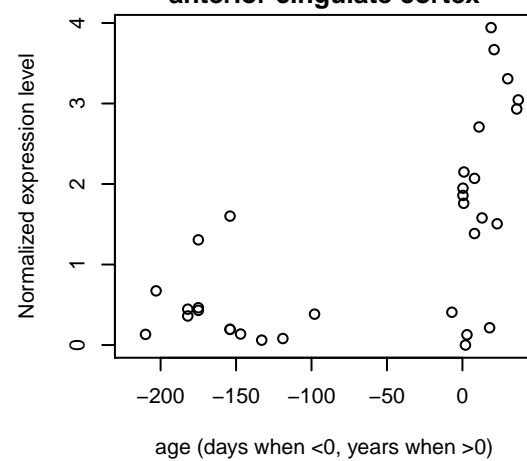

**ZMAT4\_40554514\_40554920**  
(P=1e-04, Diff = -1.5)  
anterior cingulate cortex

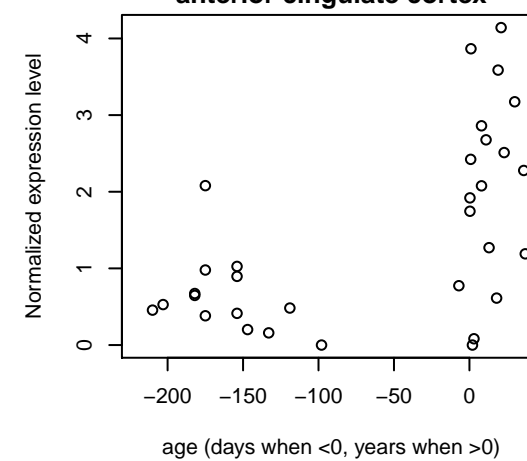

**ZMAT4\_40625159\_40625249**  
(P=5e-04, Diff = -3.87)  
anterior cingulate cortex

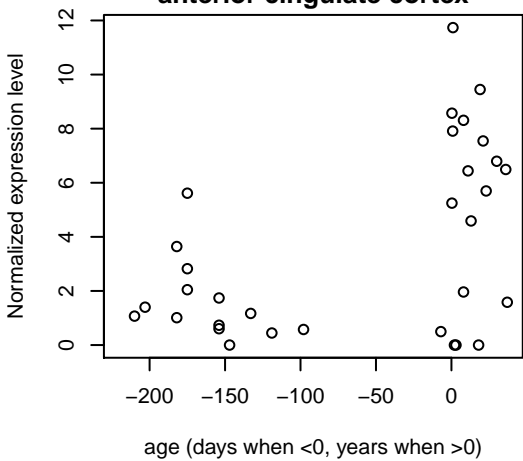

**ZMAT4\_40644207\_40644301**  
(P=0.7372, Diff = -0.04)  
anterior cingulate cortex

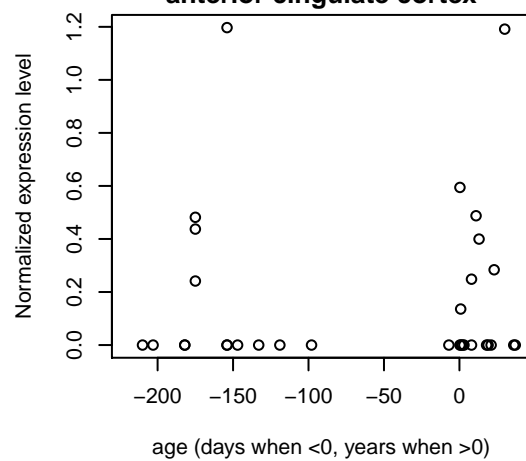

**ZMAT4\_40666027\_40666090**  
(P=0.6932, Diff = 0.03)  
anterior cingulate cortex

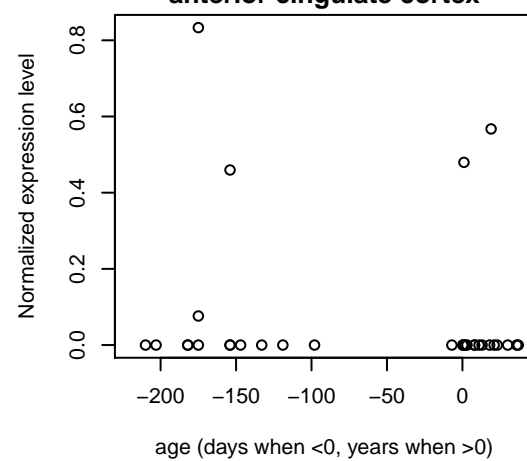

**ZMAT4\_40683093\_40683199**  
(P=4e-04, Diff = -3.91)  
anterior cingulate cortex

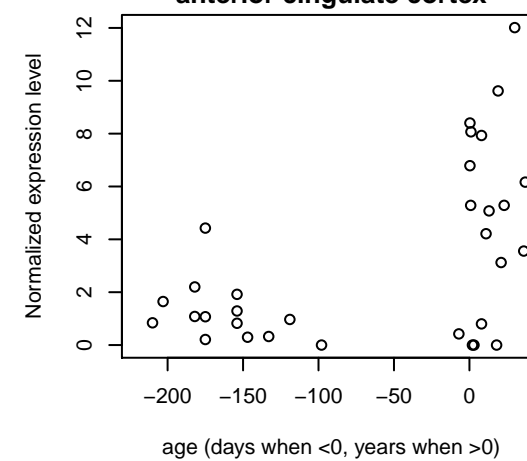

**ZMAT4\_40742047\_40742463**  
(P=0.001, Diff = -0.15)  
anterior cingulate cortex

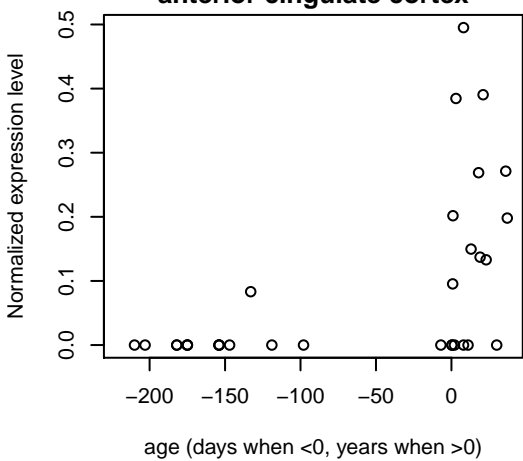

**ZMAT4\_40746013\_40746064**  
(P=NaN, Diff = 0)  
anterior cingulate cortex

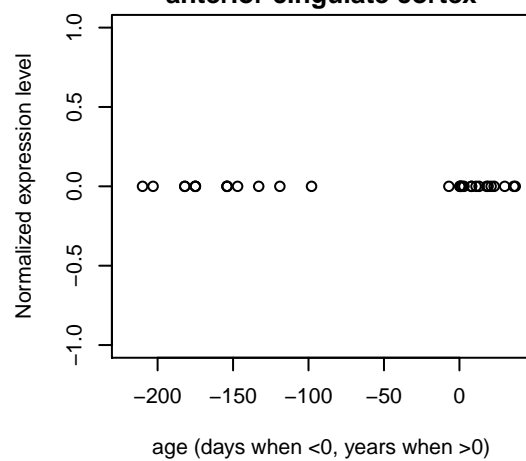

**ZMAT4\_40755201\_40755352**  
(P=0.3981, Diff = -0.33)  
anterior cingulate cortex

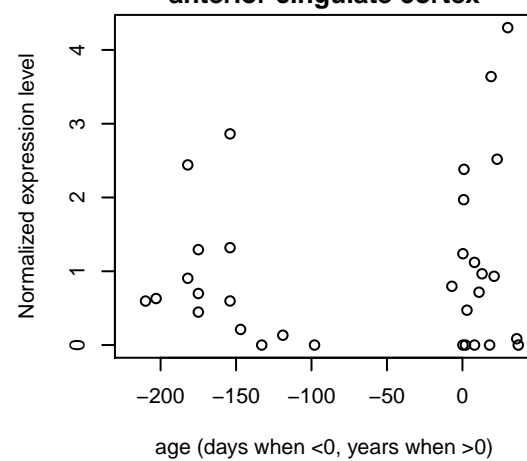

**CNDP1\_72201674\_72201926**  
(P=0.0048, Diff = -5.19)  
anterior cingulate cortex

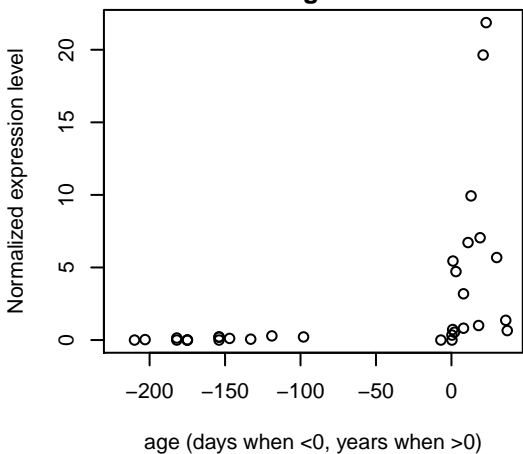

**CNDP1\_72223572\_72223701**  
(P=0.0047, Diff = -11.64)  
anterior cingulate cortex

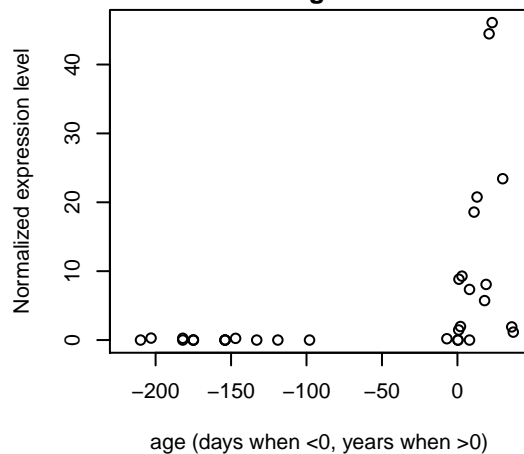

**CNDP1\_72226557\_72226707**  
(P=0.0058, Diff = -10.5)  
anterior cingulate cortex

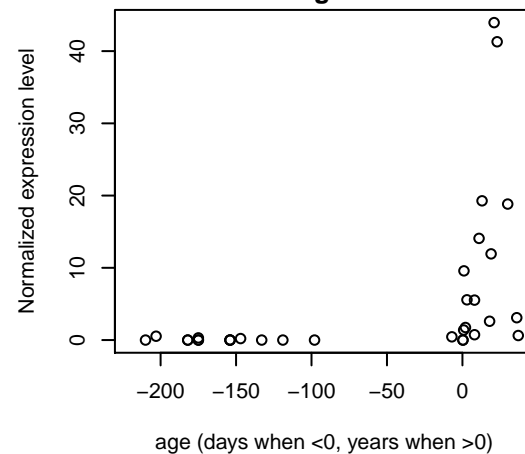

**CNDP1\_72228090\_72228253**  
(P=0.0048, Diff = -15.35)  
anterior cingulate cortex

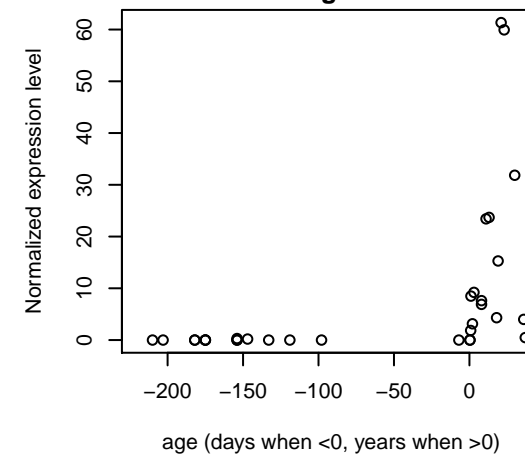

**CNDP1\_72229281\_72229370**  
(P=0.0044, Diff = -22.56)  
anterior cingulate cortex

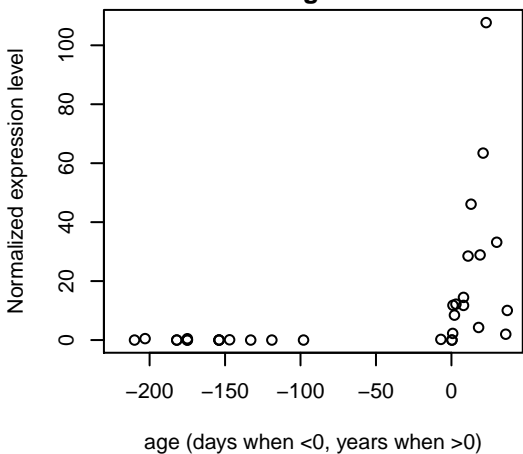

**CNDP1\_72234467\_72234668**  
(P=0.0033, Diff = -26.59)  
anterior cingulate cortex

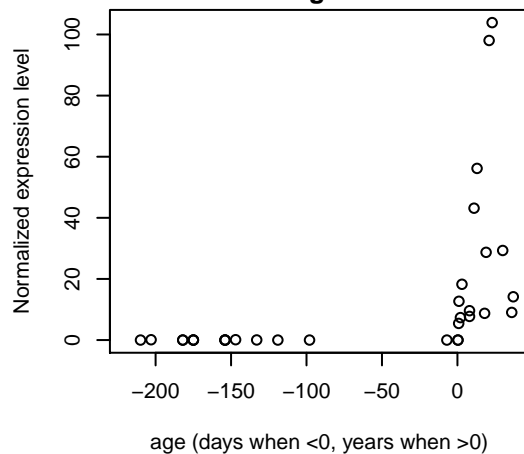

**CNDP1\_72238420\_72238505**  
(P=0.0034, Diff = -27.37)  
anterior cingulate cortex

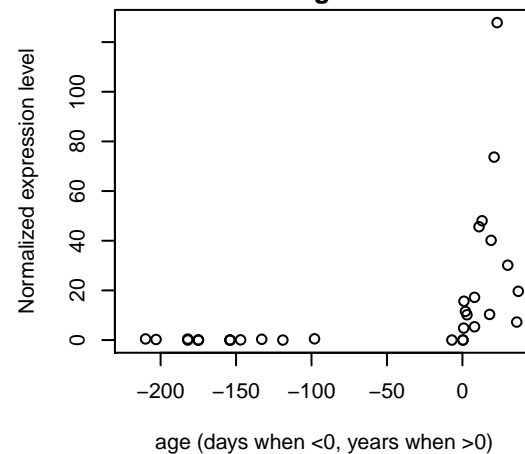

**CNDP1\_72244103\_72244264**  
(P=9e-04, Diff = -18.29)  
anterior cingulate cortex

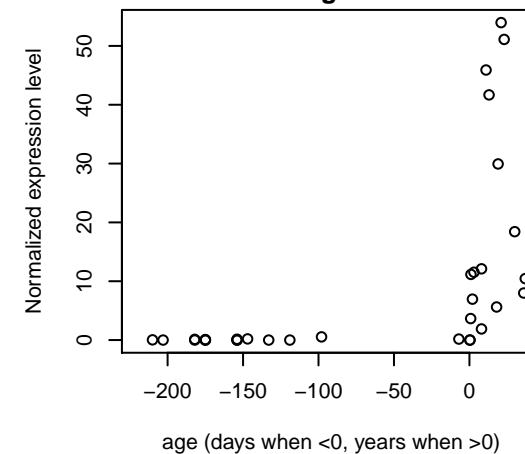

**CNDP1\_72245397\_72245562**  
(P=0.0017, Diff = -25.23)  
anterior cingulate cortex

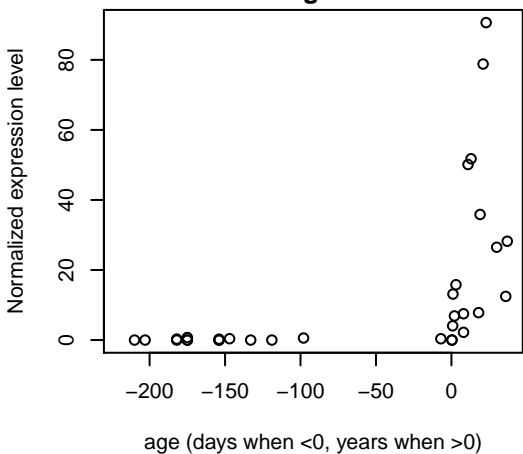

**CNDP1\_72247365\_72247507**  
(P=9e-04, Diff = -31.96)  
anterior cingulate cortex

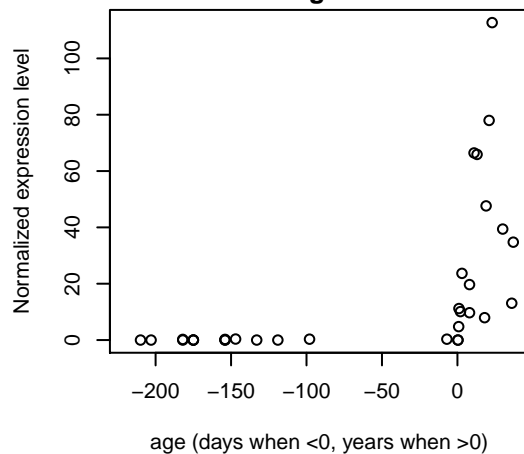

**CNDP1\_72250796\_72250944**  
(P=0.002, Diff = -28.39)  
anterior cingulate cortex

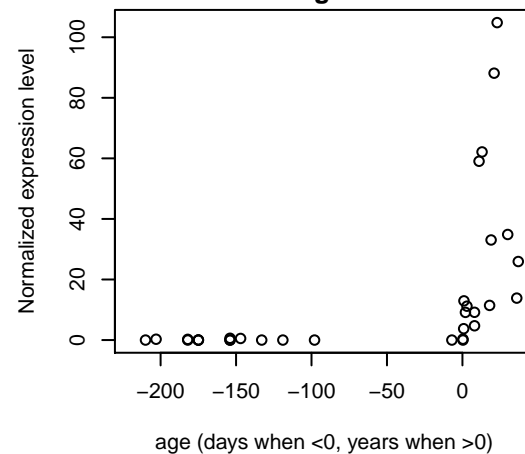

**CNDP1\_72251731\_72252261**  
(P=8e-04, Diff = -18.24)  
anterior cingulate cortex

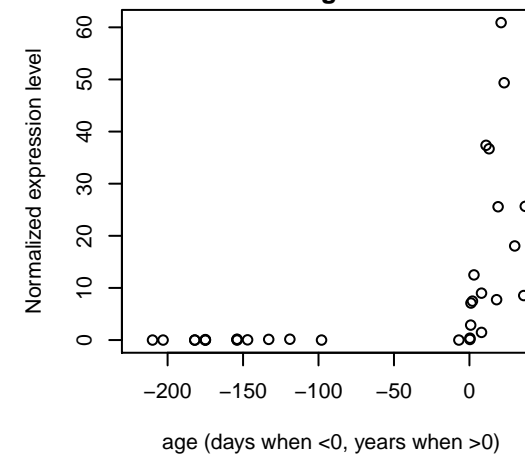

**TOX3\_52471917\_52473880**  
(P=0, Diff = 12.88)  
anterior cingulate cortex

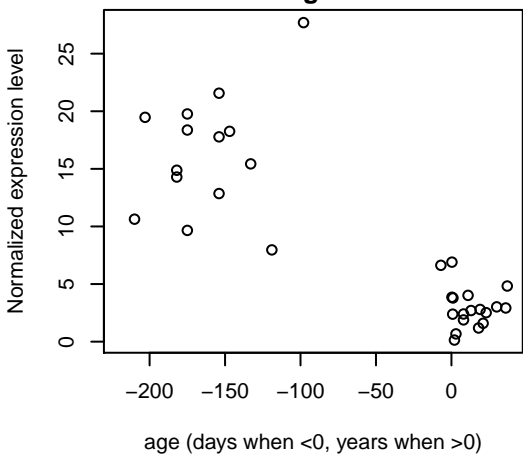

**TOX3\_52478187\_52478268**  
(P=0, Diff = 13.8)  
anterior cingulate cortex

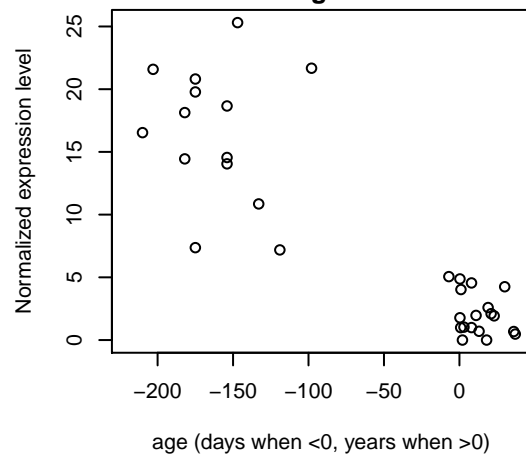

**TOX3\_52479905\_52480133**  
(P=0, Diff = 12.01)  
anterior cingulate cortex

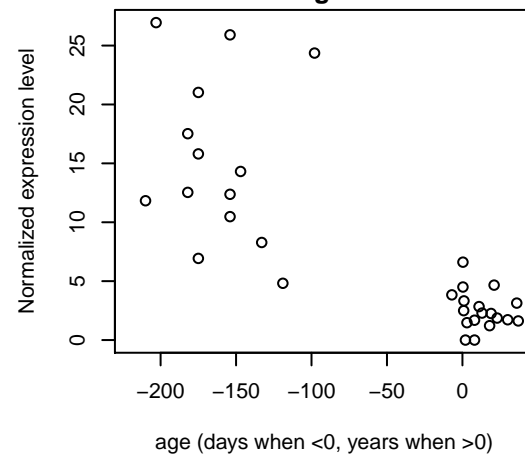

**TOX3\_52484188\_52484458**  
(P=0, Diff = 14)  
anterior cingulate cortex

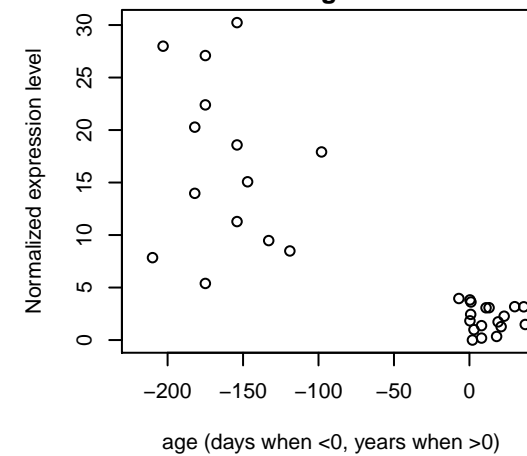

**TOX3\_52497845\_52498100**  
(P=0, Diff = 13.98)  
anterior cingulate cortex

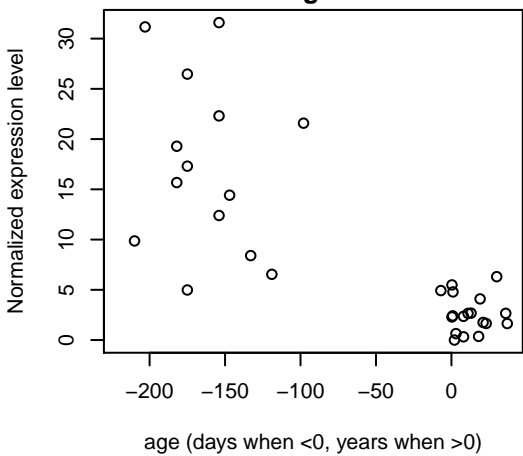

**TOX3\_52502420\_52502486**  
(P=0, Diff = 9.35)  
anterior cingulate cortex

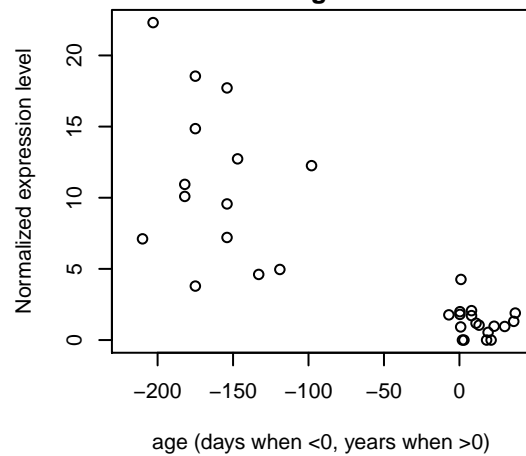

**TOX3\_52553317\_52553491**  
(P=0.0993, Diff = 0.14)  
anterior cingulate cortex

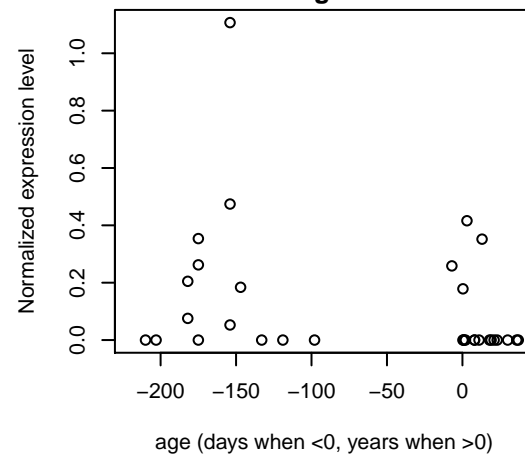

**TOX3\_52580548\_52580806**  
(P=0, Diff = 3.34)  
anterior cingulate cortex

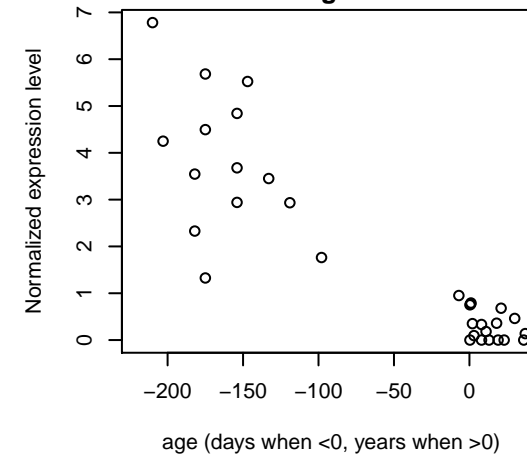

**TOX3\_52581625\_52581714**  
(P=0.389, Diff = 0.07)  
anterior cingulate cortex

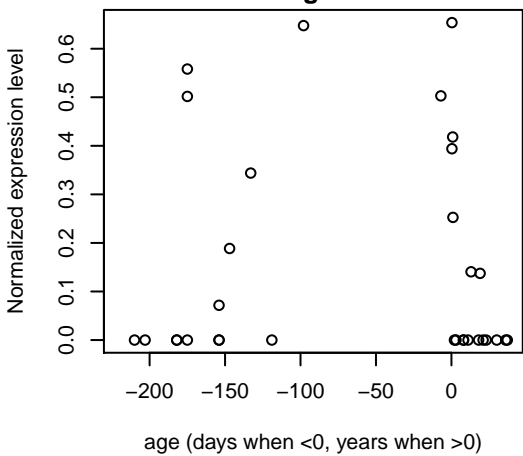

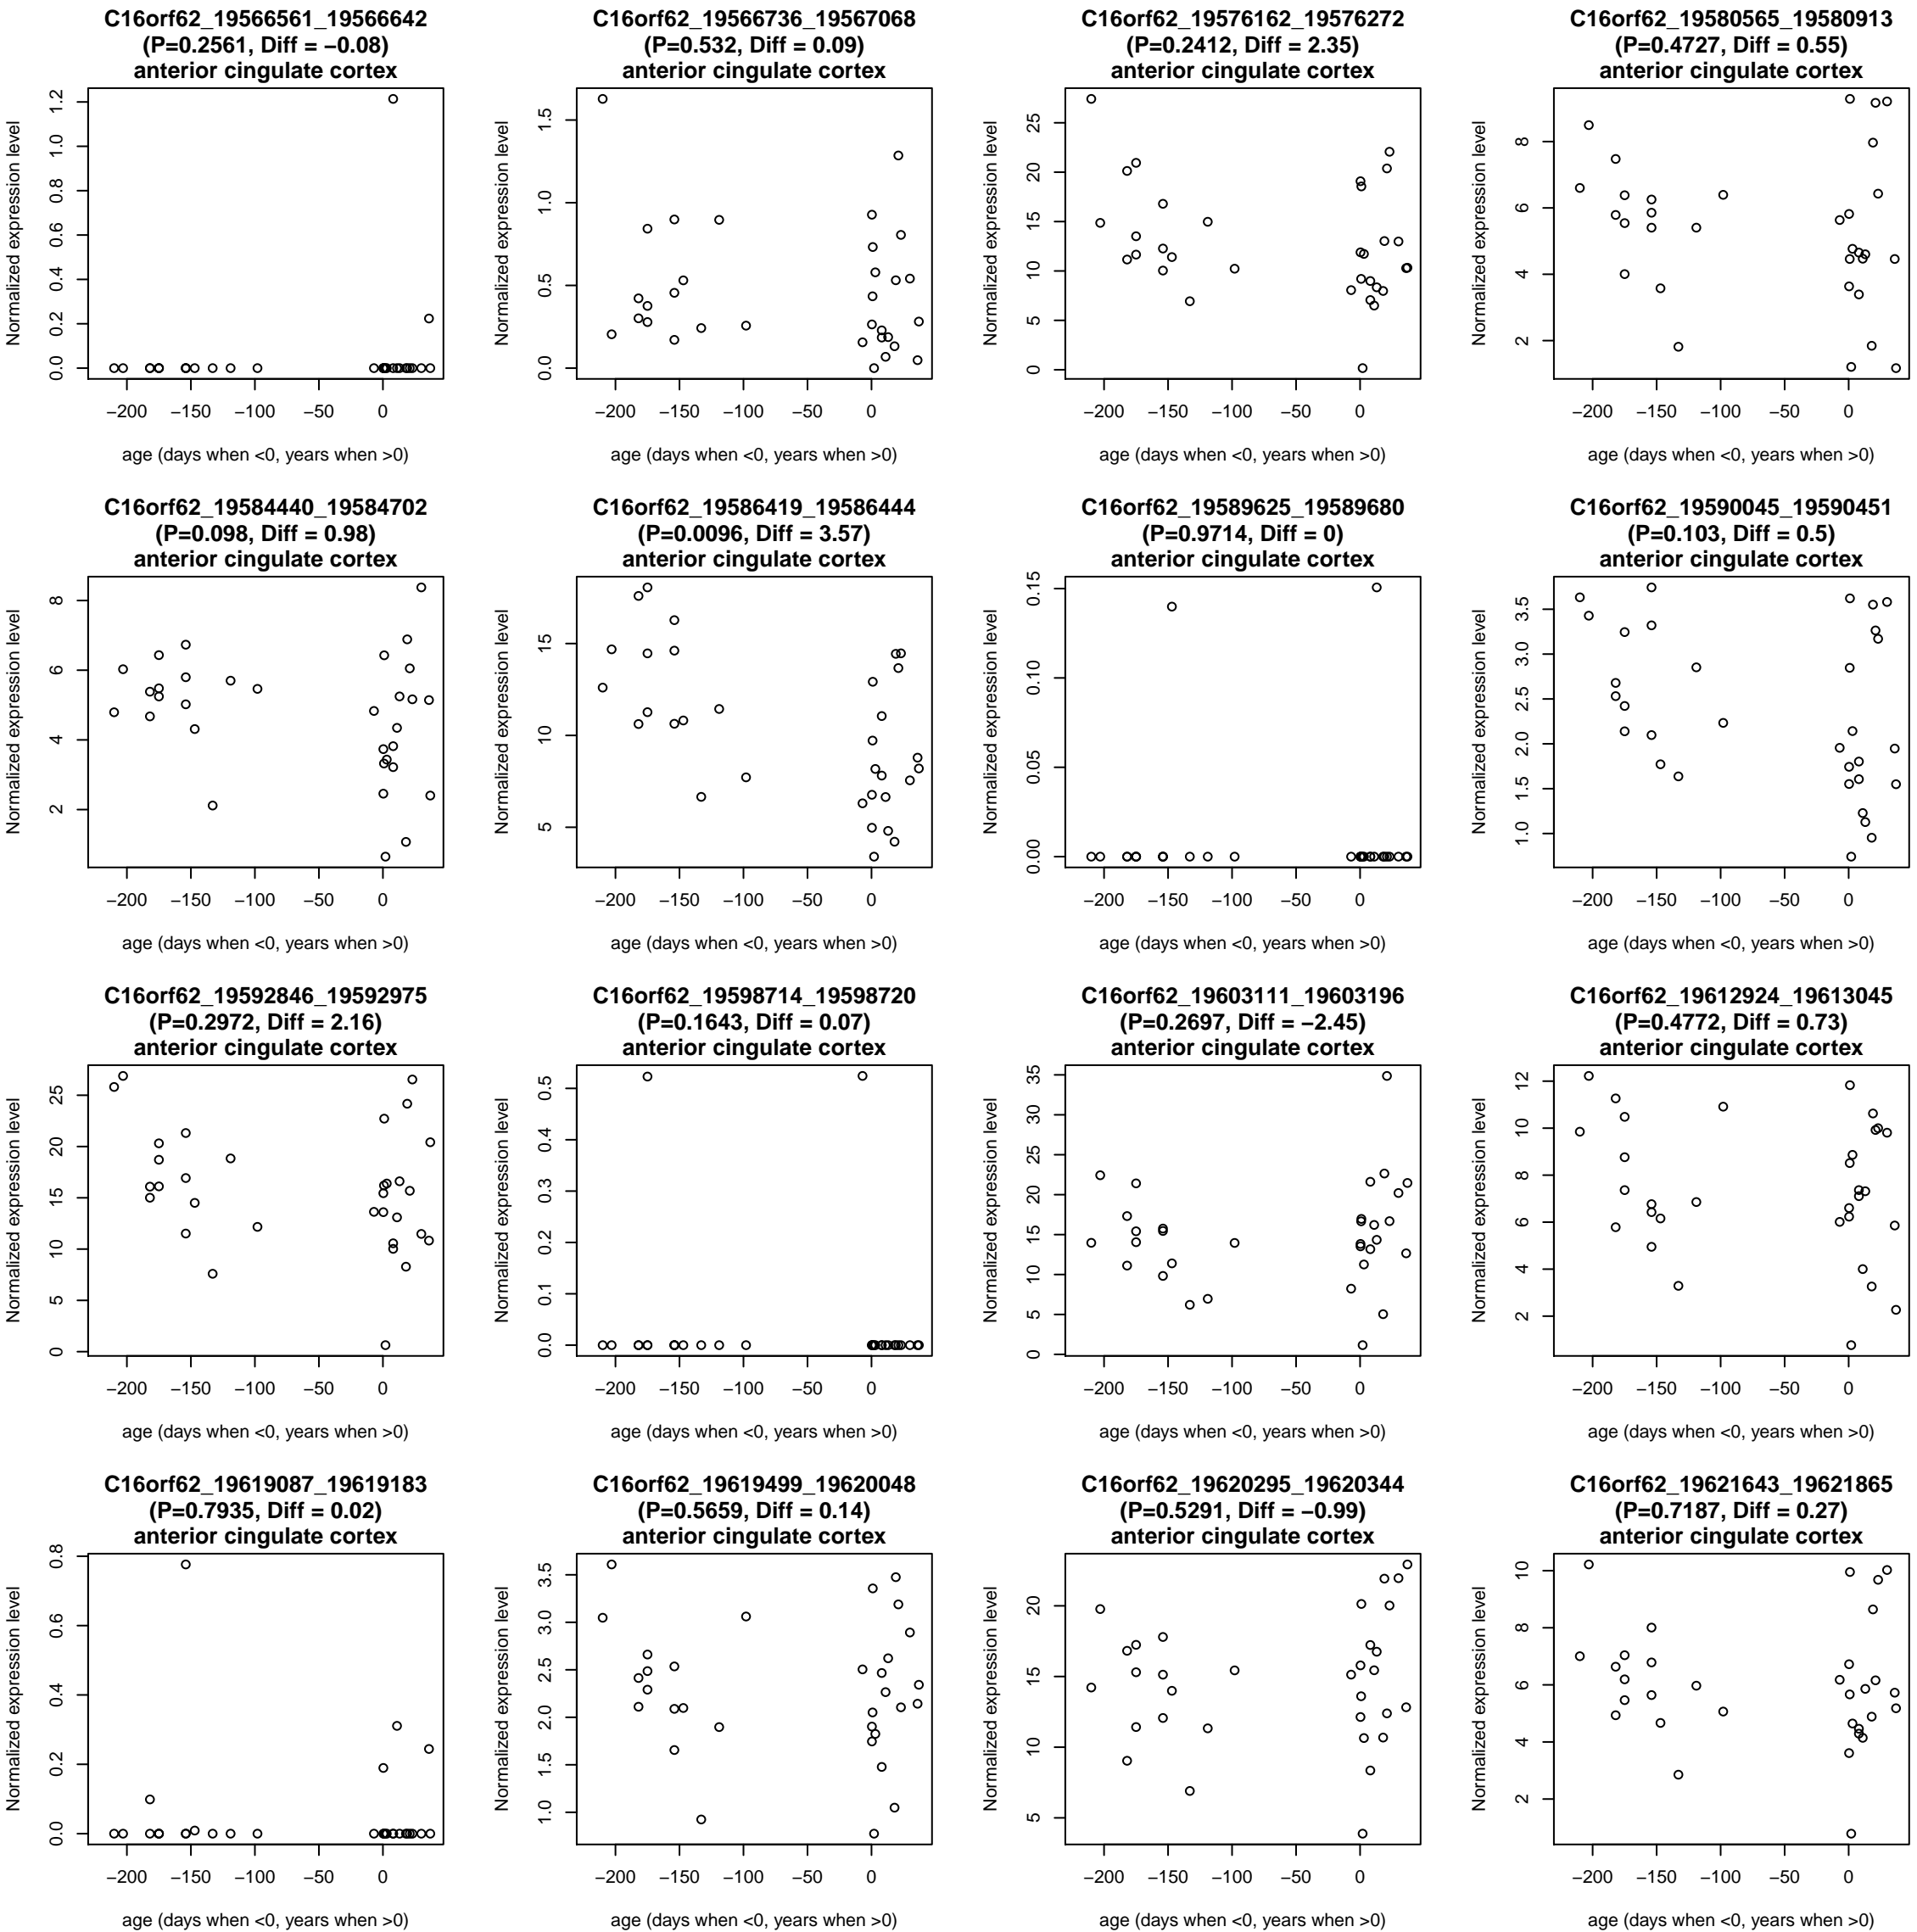

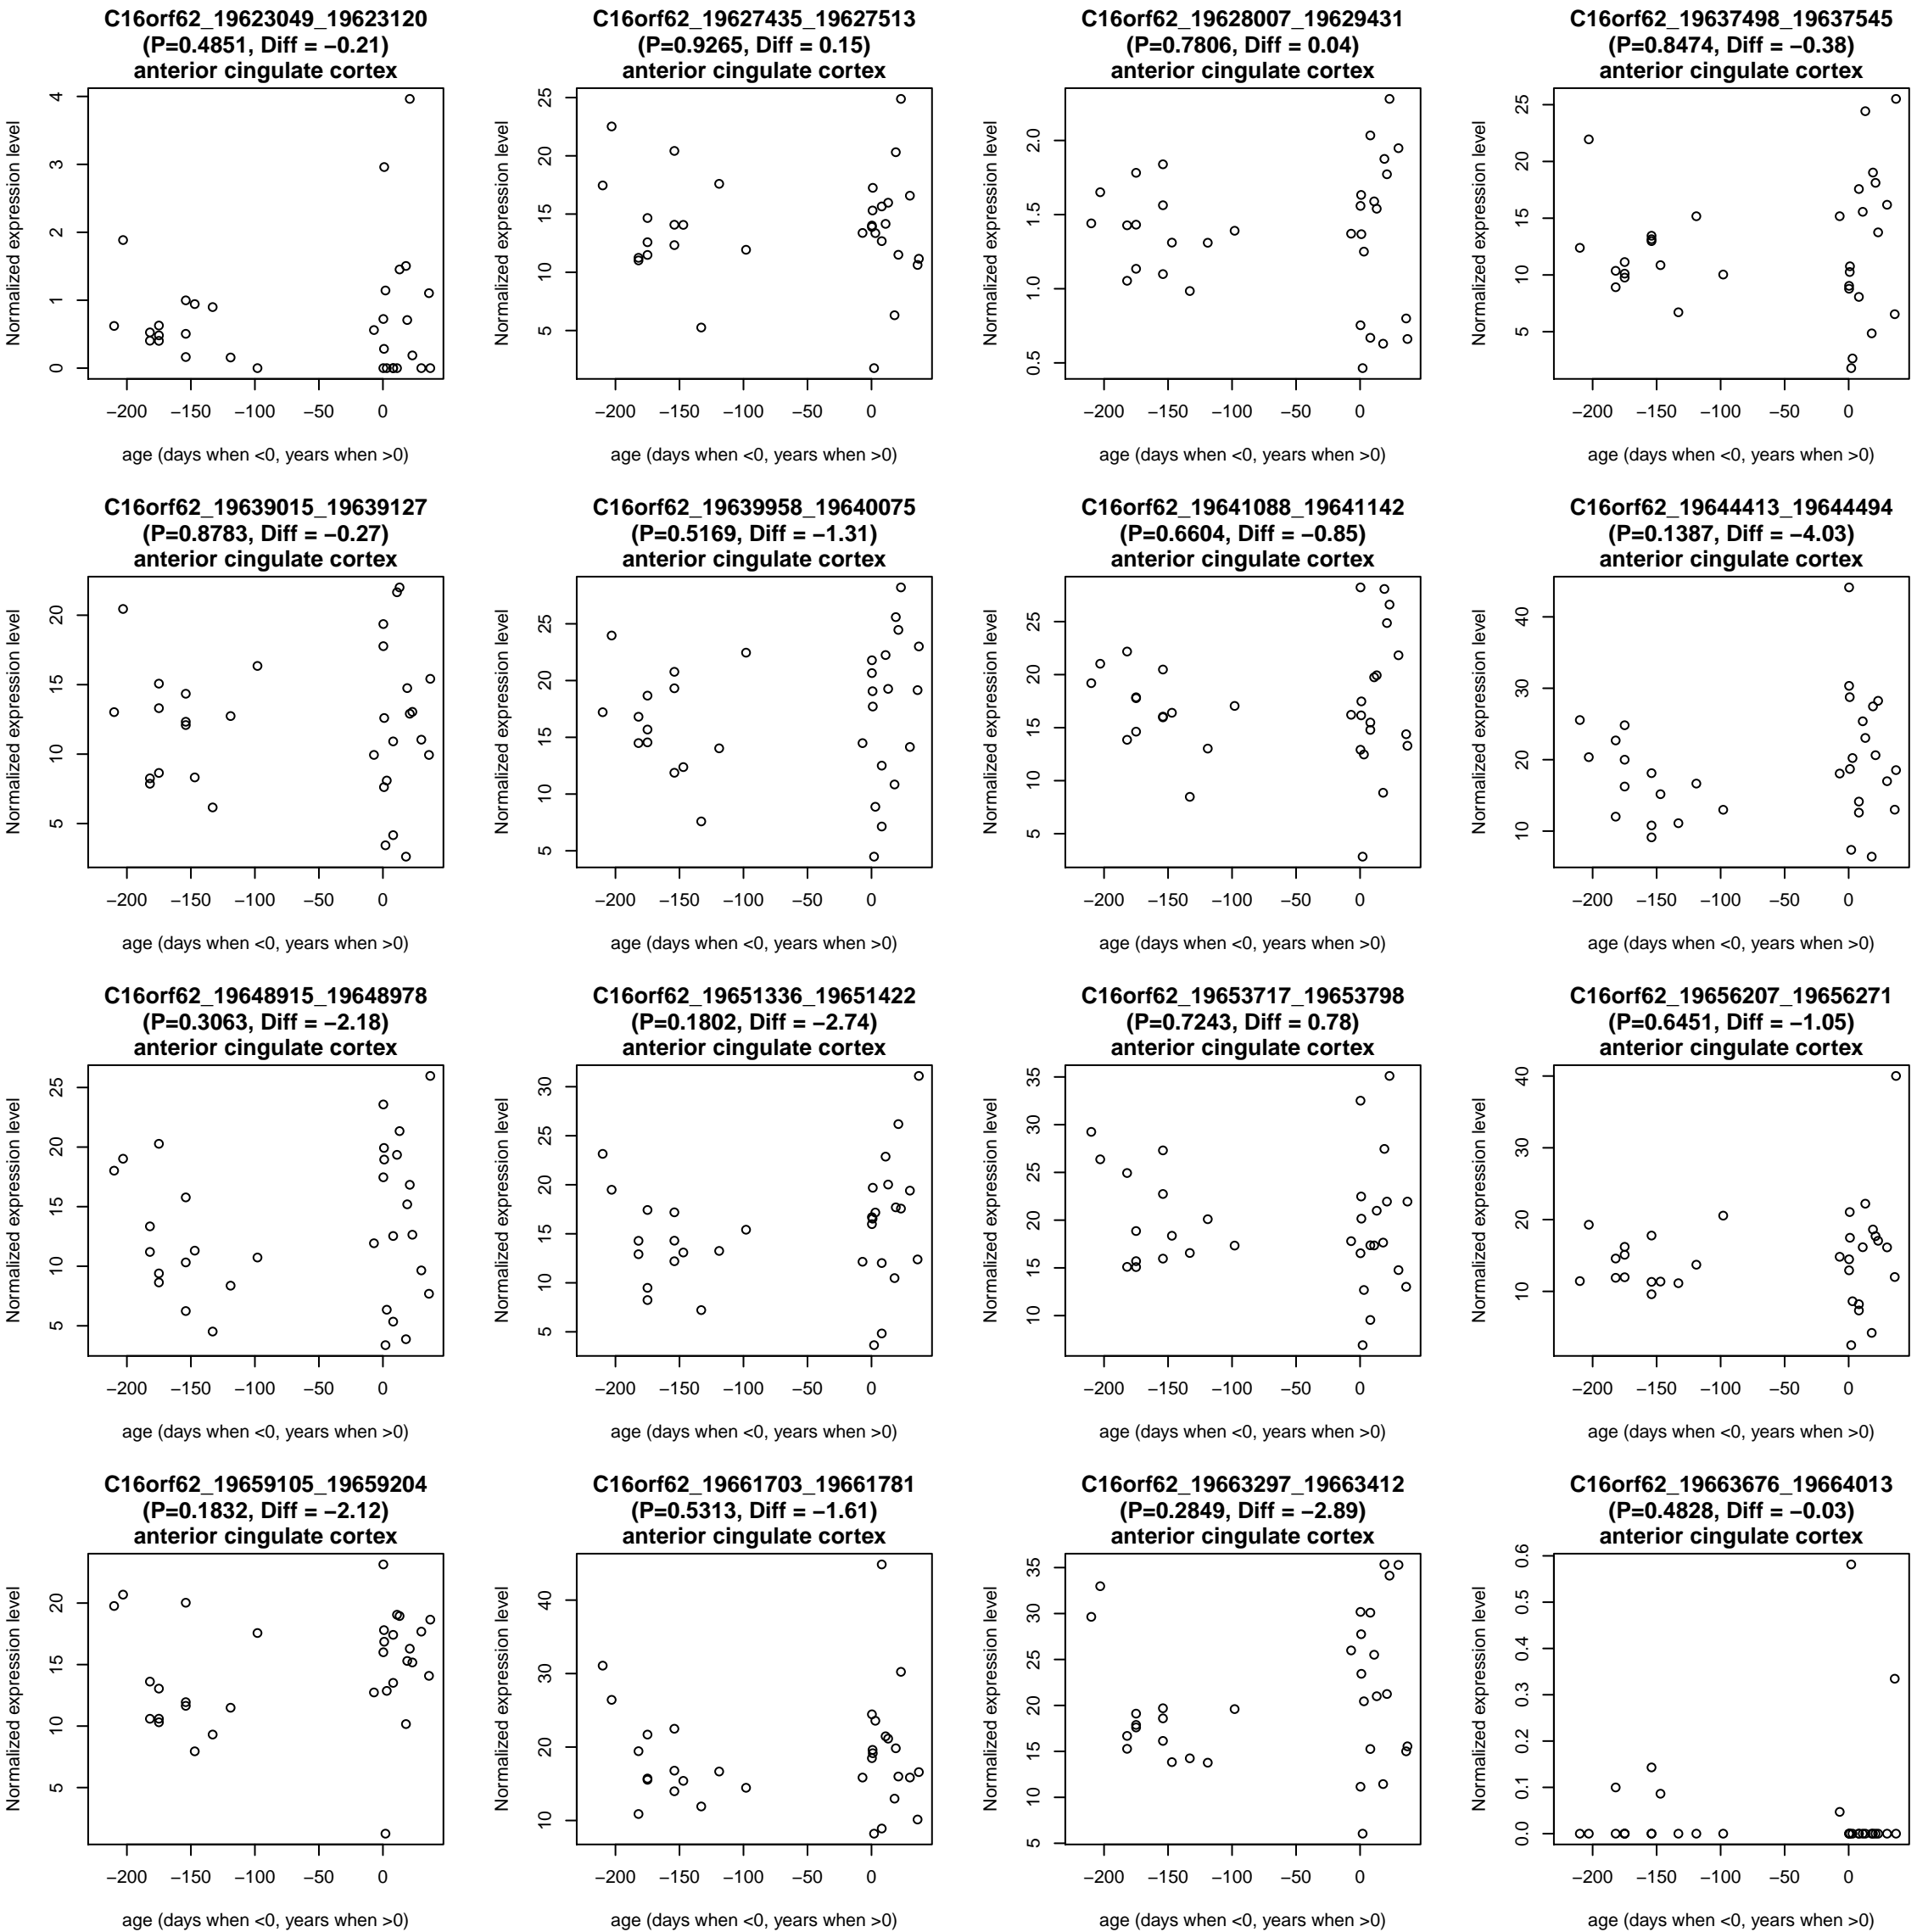

**C16orf62\_19680481\_19680621**  
(P=0.0543, Diff = -4.25)  
anterior cingulate cortex

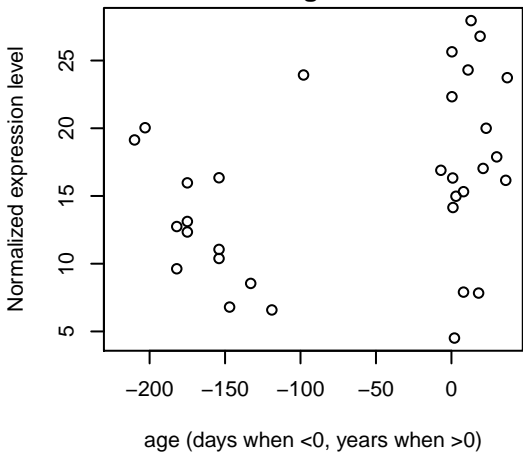

**C16orf62\_19693546\_19693712**  
(P=0.0426, Diff = -4.85)  
anterior cingulate cortex

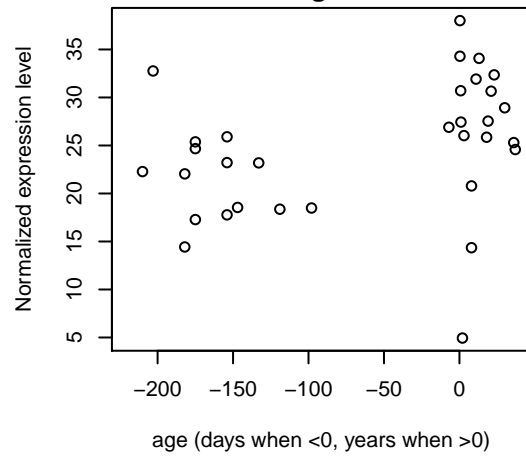

**C16orf62\_19702674\_19702793**  
(P=0.055, Diff = -5.68)  
anterior cingulate cortex

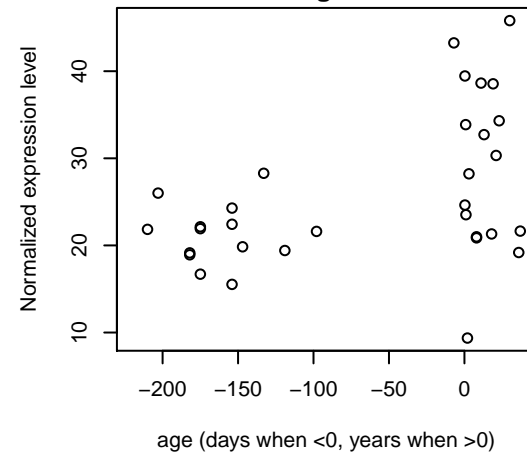

**C16orf62\_19710823\_19710970**  
(P=0.0212, Diff = -7.87)  
anterior cingulate cortex

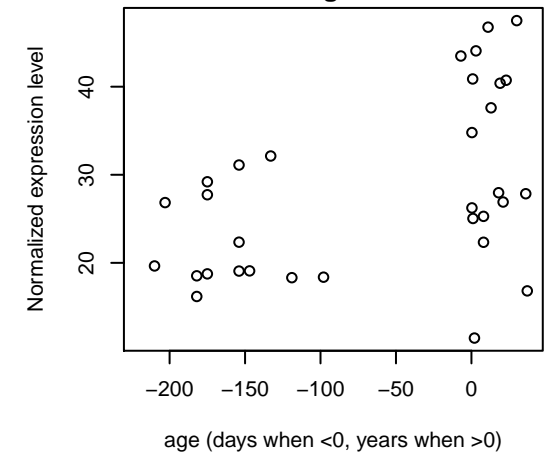

**C16orf62\_19711699\_19712448**  
(P=0.0051, Diff = -2.81)  
anterior cingulate cortex

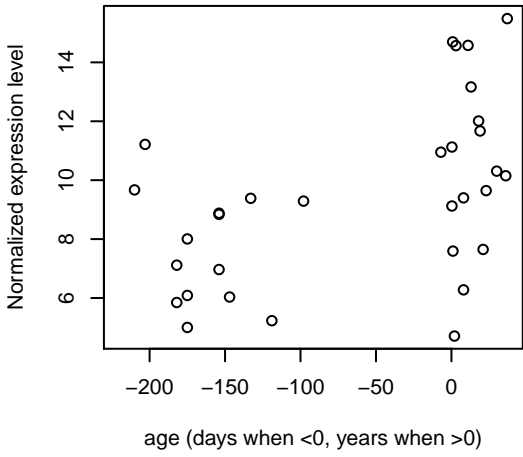

**C16orf62\_19716437\_19716880**  
(P=0.001, Diff = 1.49)  
anterior cingulate cortex

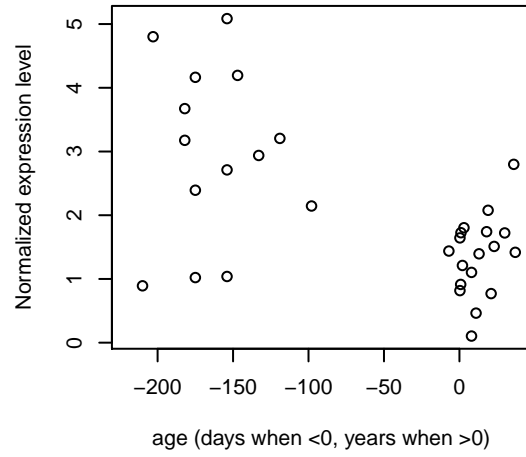



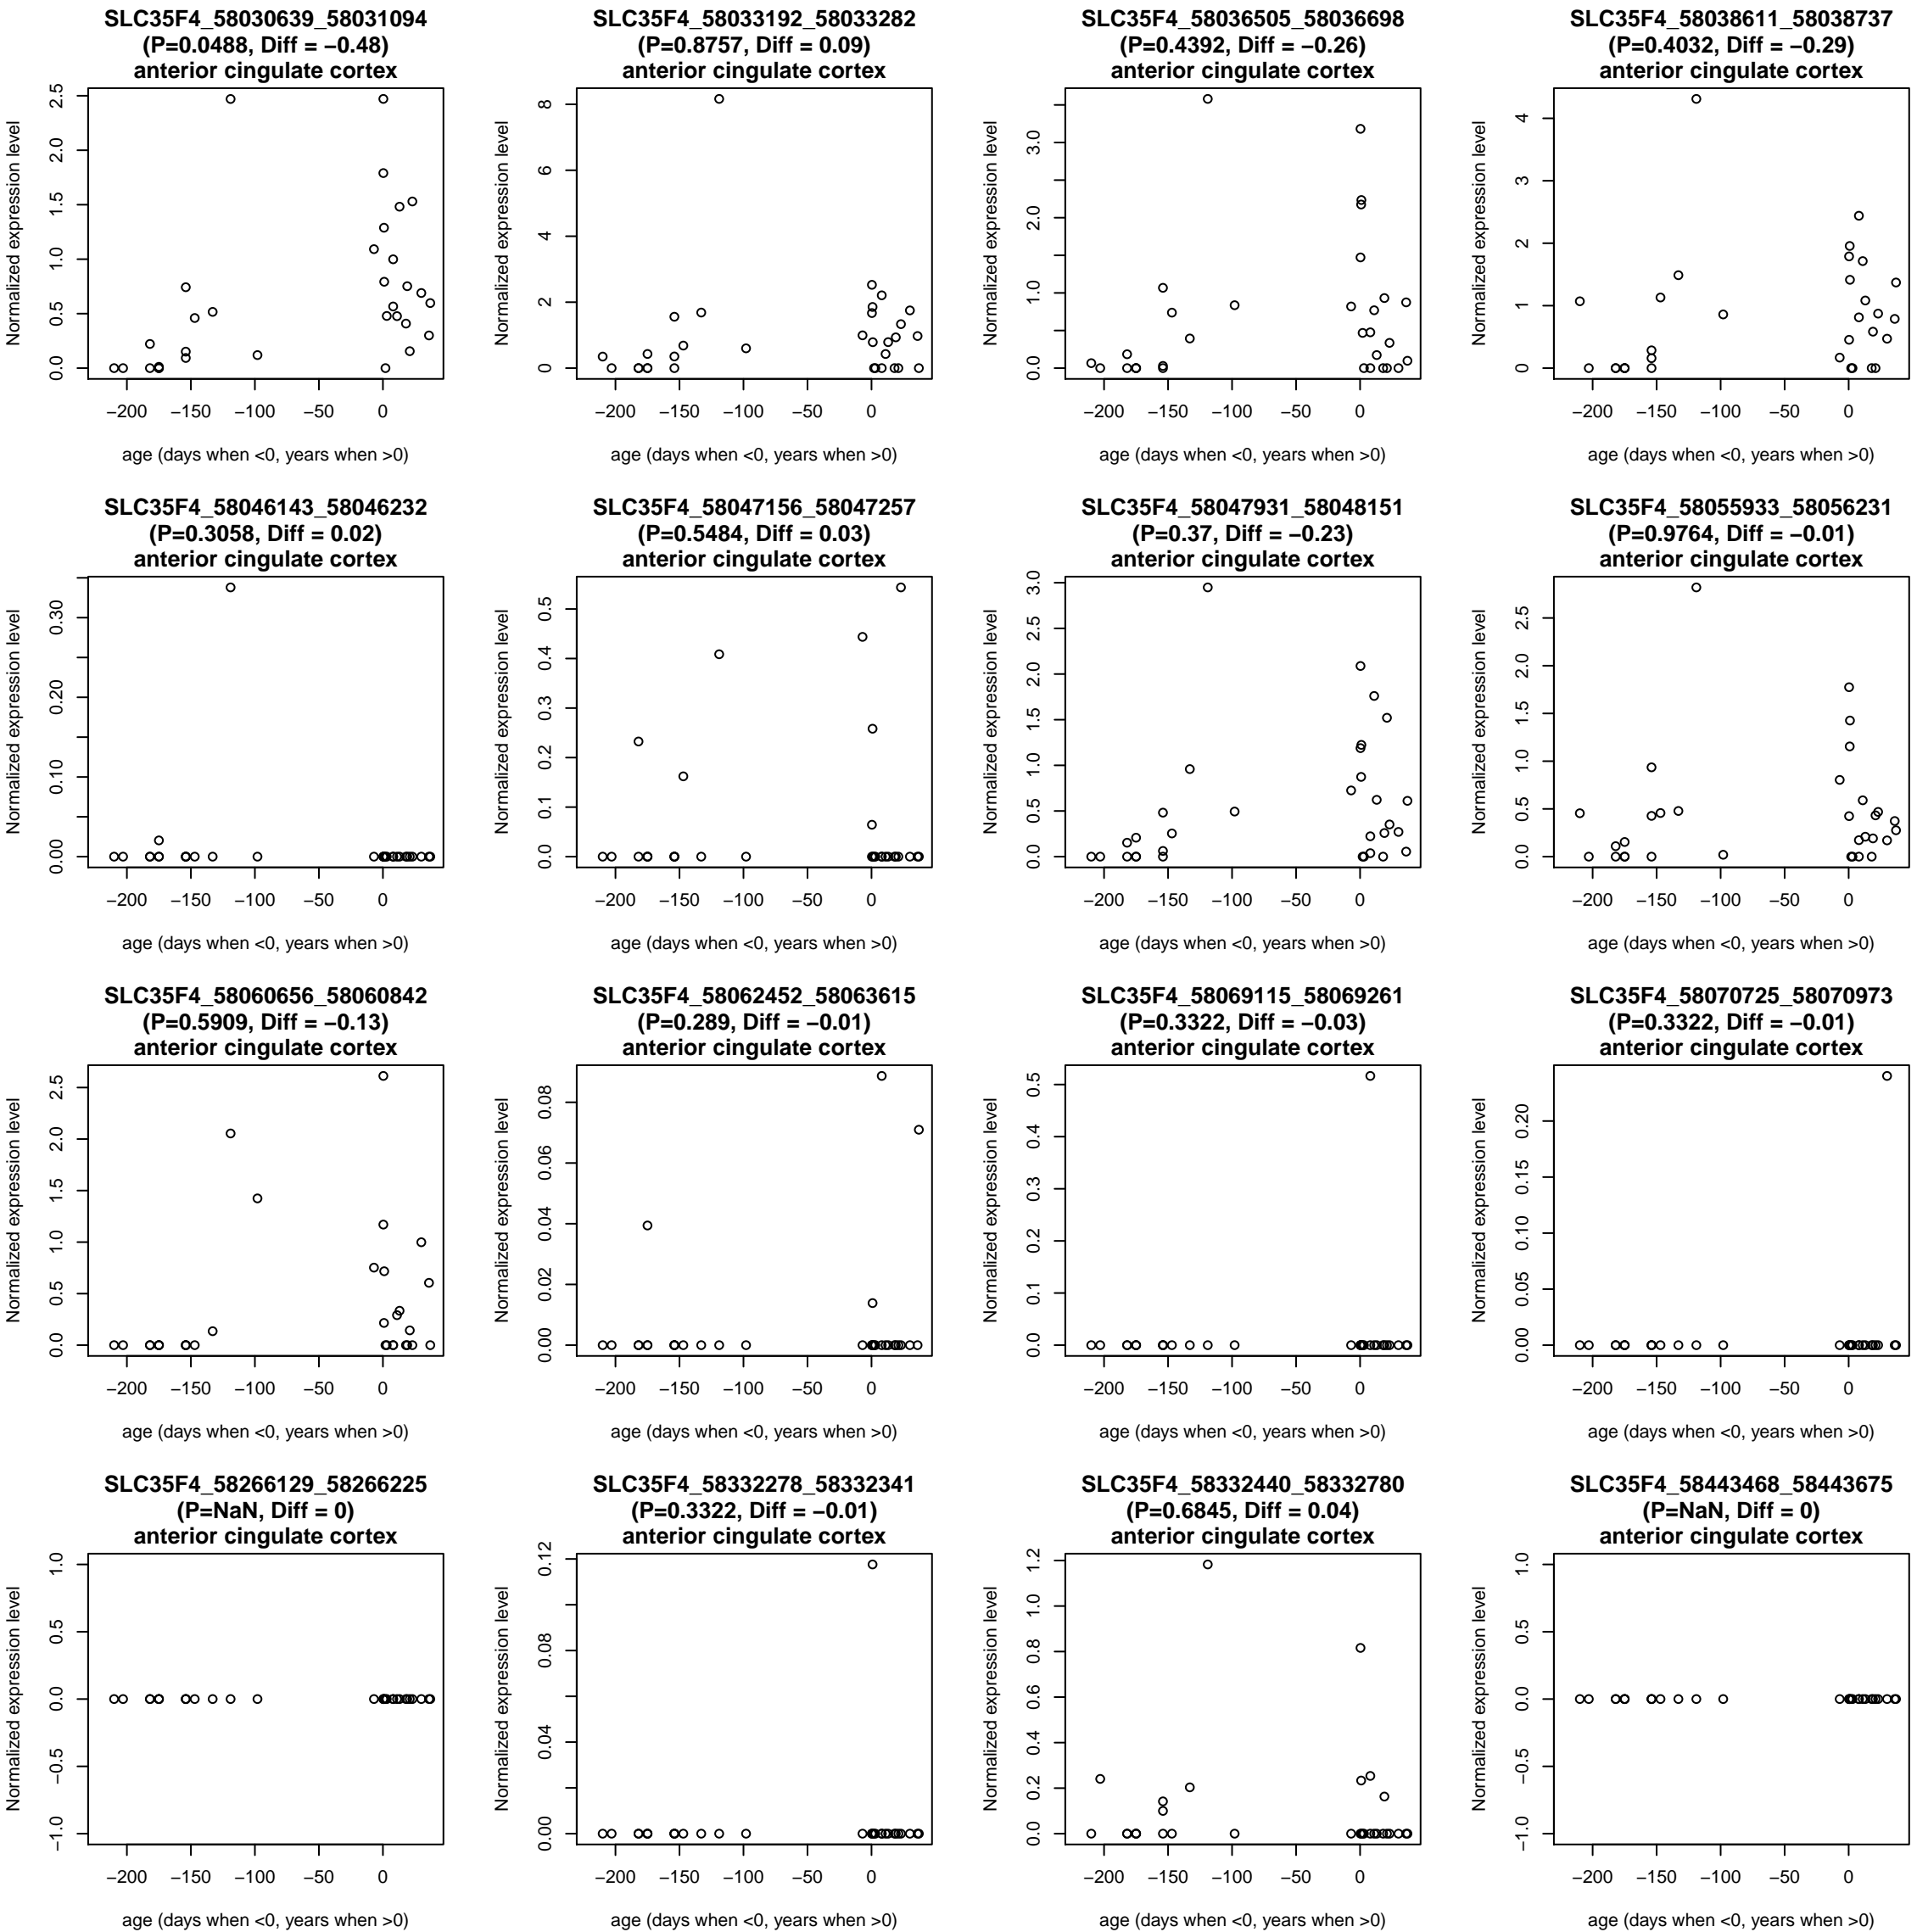

SLC35F4\_58448630\_58448912  
(P=0.3322, Diff = -0.01)  
anterior cingulate cortex

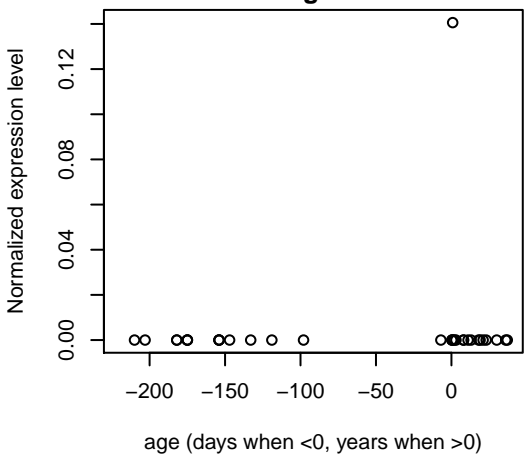

**CACNB2\_18429605\_18429785**  
( $P=0.7828$ , Diff =  $-0.03$ )  
anterior cingulate cortex

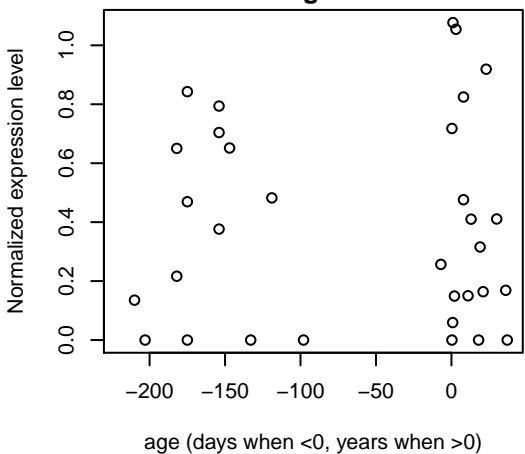

**CACNB2\_18429886\_18430144**  
( $P=0.0017$ , Diff =  $-0.44$ )  
anterior cingulate cortex

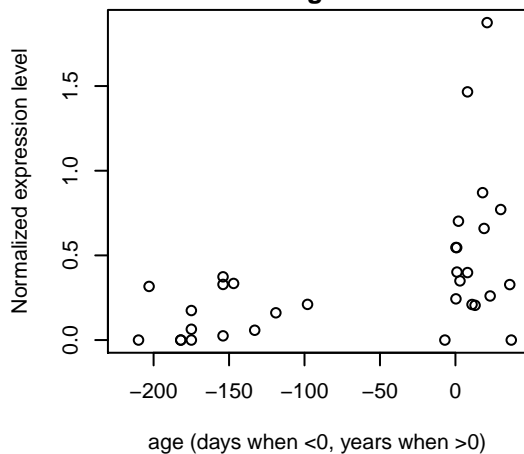

**CACNB2\_18439811\_18440198**  
( $P=0.2796$ , Diff =  $-0.11$ )  
anterior cingulate cortex

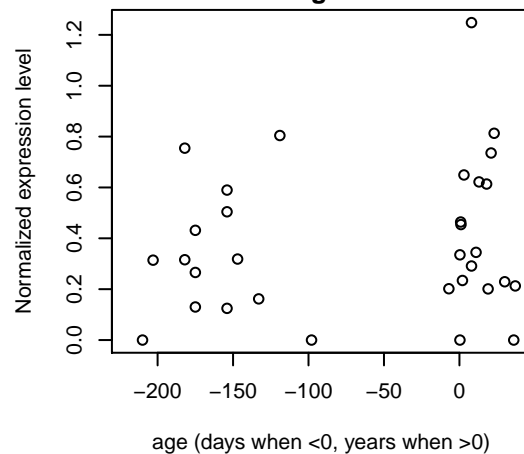

**CACNB2\_18470735\_18471036**  
( $P=0.0626$ , Diff =  $-0.15$ )  
anterior cingulate cortex

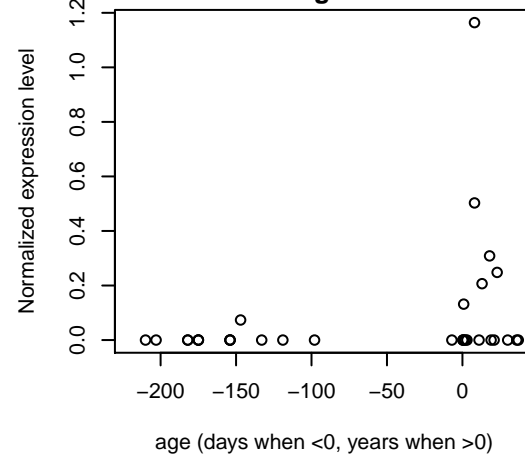

**CACNB2\_18549697\_18550246**  
( $P=0$ , Diff =  $-0.98$ )  
anterior cingulate cortex

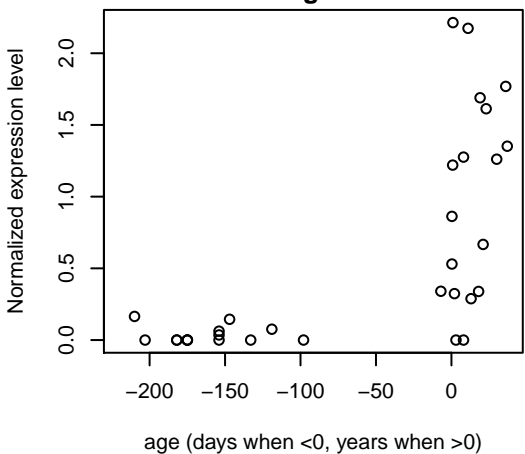

**CACNB2\_18629645\_18629906**  
( $P=0.0468$ , Diff =  $-0.16$ )  
anterior cingulate cortex

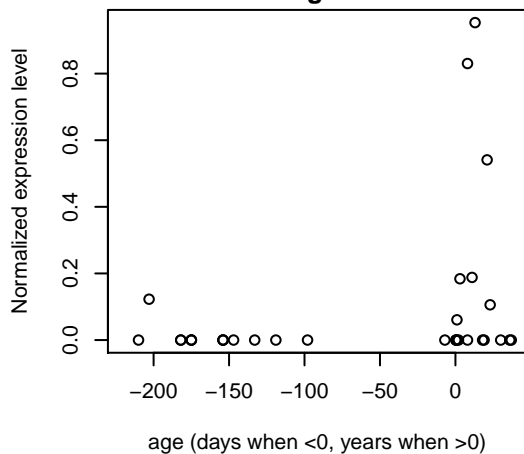

**CACNB2\_18689741\_18690029**  
( $P=2e-04$ , Diff =  $-4.33$ )  
anterior cingulate cortex

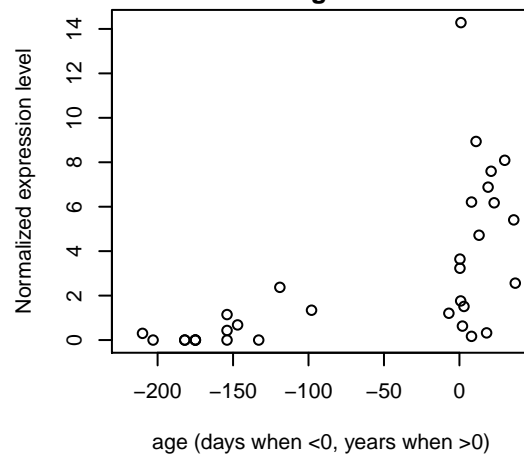

**CACNB2\_18690852\_18690972**  
( $P=2e-04$ , Diff =  $-6.02$ )  
anterior cingulate cortex

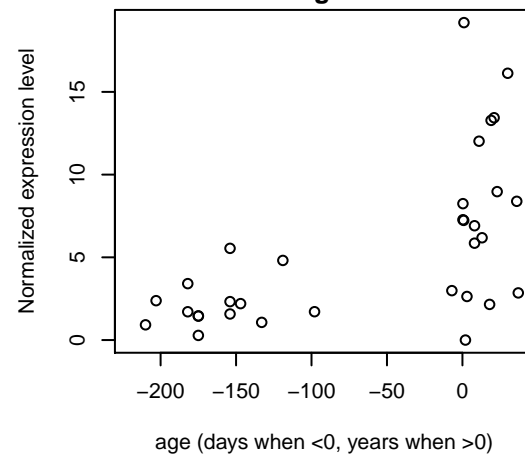

**CACNB2\_18787283\_18787722**  
( $P=0$ , Diff =  $-2.84$ )  
anterior cingulate cortex

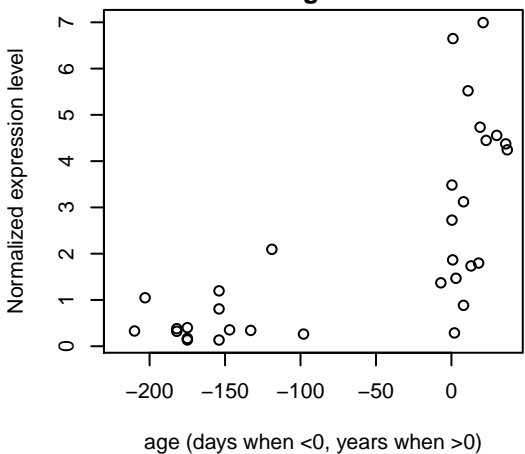

**CACNB2\_18789740\_18789877**  
( $P=0$ , Diff =  $-9.11$ )  
anterior cingulate cortex

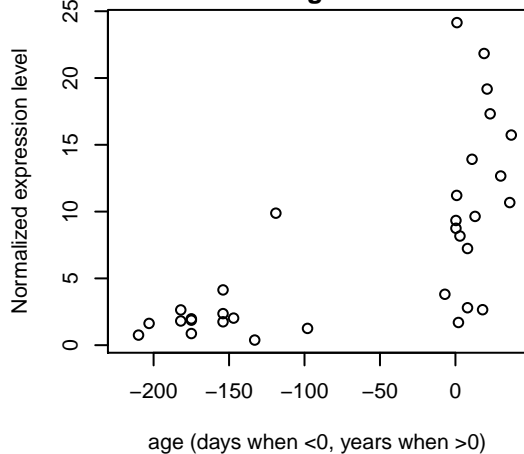

**CACNB2\_18795399\_18795476**  
( $P=0$ , Diff =  $-11.99$ )  
anterior cingulate cortex

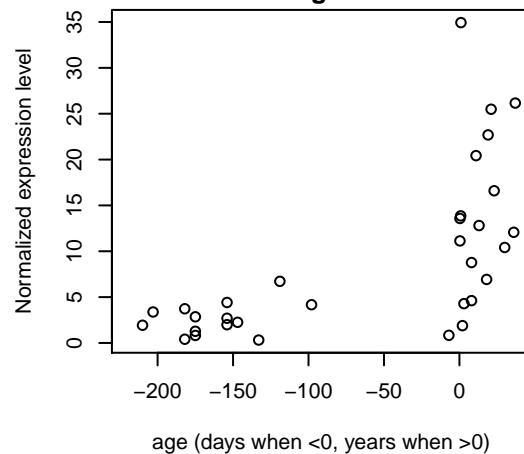

**CACNB2\_18803164\_18803298**  
( $P=0$ , Diff =  $-9.04$ )  
anterior cingulate cortex

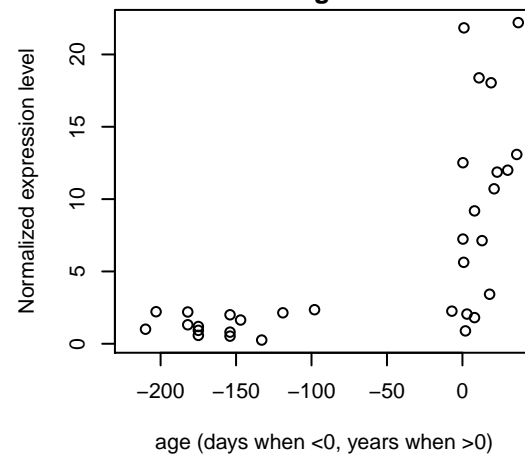

**CACNB2\_18803439\_18803459**  
( $P=0.0143$ , Diff =  $-0.87$ )  
anterior cingulate cortex

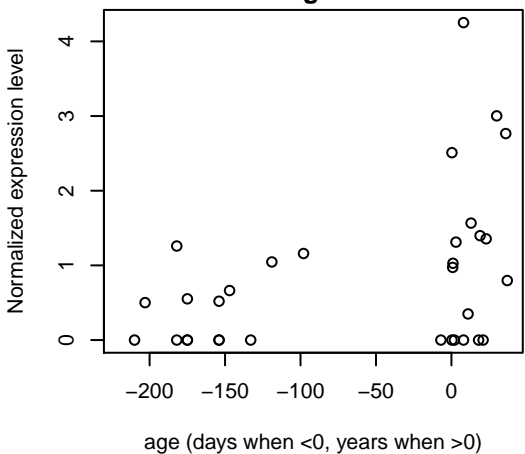

**CACNB2\_18803908\_18803970**  
( $P=0.7209$ , Diff =  $-0.04$ )  
anterior cingulate cortex

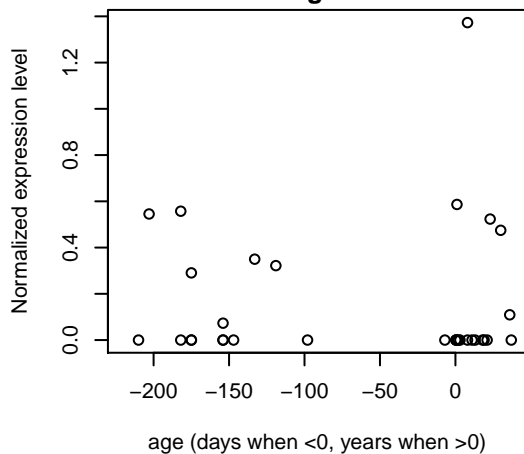

**CACNB2\_18807264\_18807345**  
( $P=4e-04$ , Diff =  $-7.43$ )  
anterior cingulate cortex

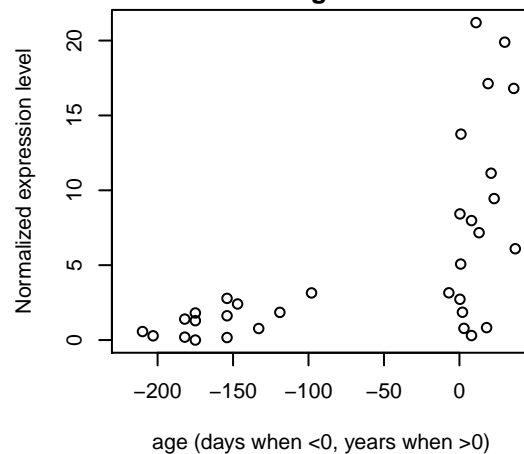

**CACNB2\_18807838\_18807897**  
( $P=0$ , Diff =  $-7.72$ )  
anterior cingulate cortex

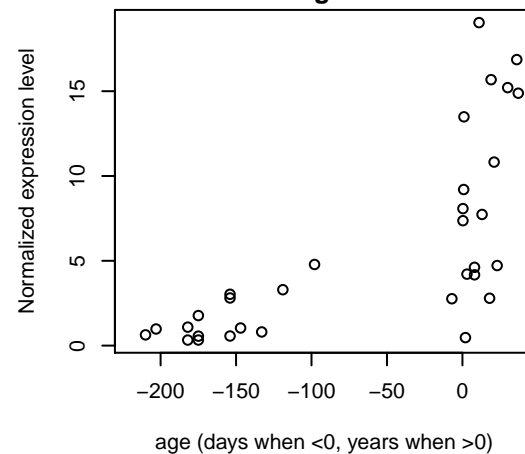

**CACNB2\_18816516\_18816626**  
(P=0, Diff = -11.11)  
anterior cingulate cortex

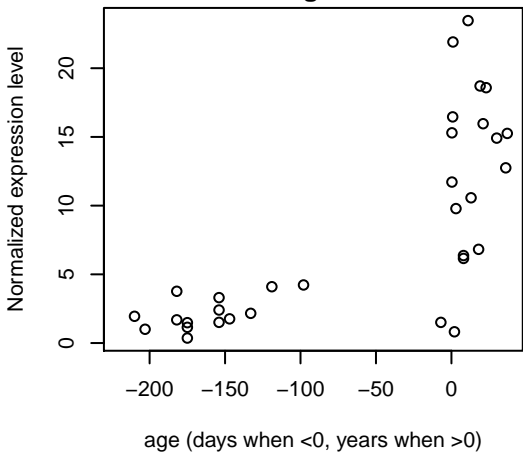

**CACNB2\_18823004\_18823156**  
(P=0, Diff = -9.87)  
anterior cingulate cortex

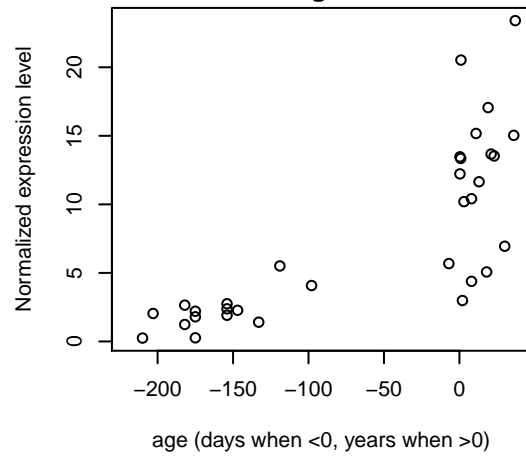

**CACNB2\_18825029\_18825125**  
(P=0, Diff = -13.37)  
anterior cingulate cortex

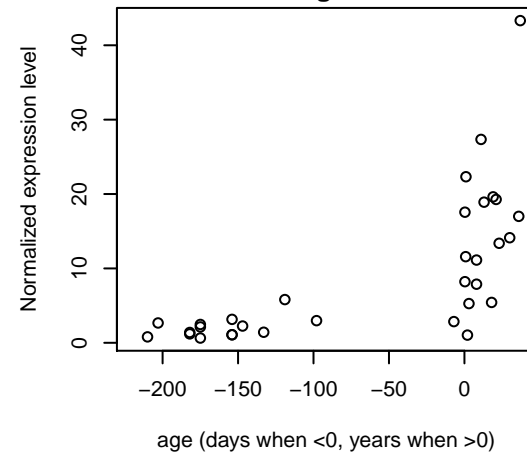

**CACNB2\_18827108\_18827294**  
(P=0, Diff = -12.92)  
anterior cingulate cortex

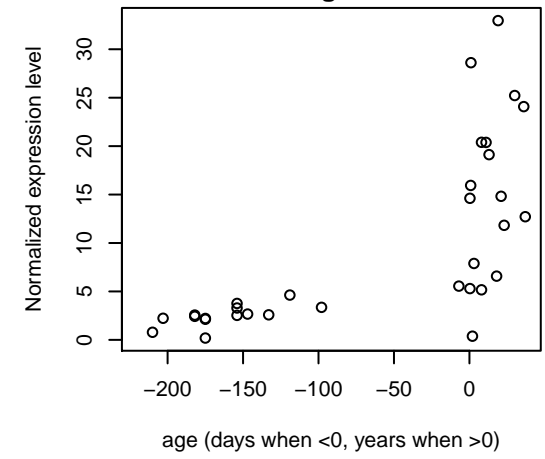

**CACNB2\_18828158\_18830798**  
(P=0, Diff = -10.33)  
anterior cingulate cortex

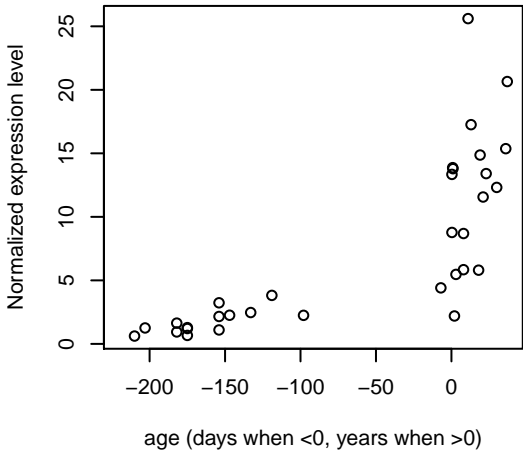

**CTH\_70876900\_70877266**  
(P=0.5707, Diff = 0.25)  
anterior cingulate cortex

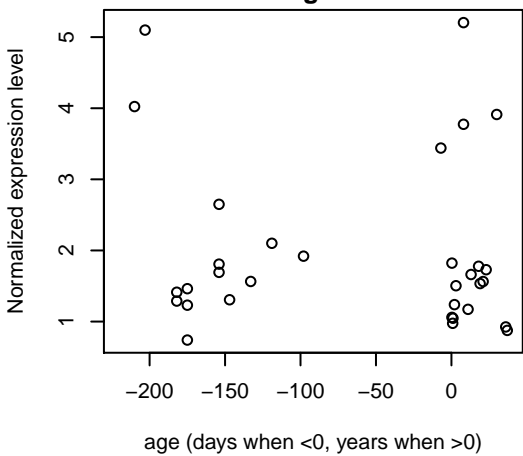

**CTH\_70881638\_70881720**  
(P=0.6591, Diff = 0.19)  
anterior cingulate cortex

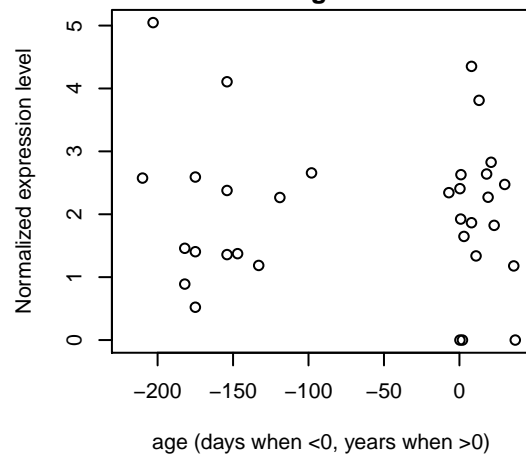

**CTH\_70883619\_70883715**  
(P=0.6074, Diff = 0.18)  
anterior cingulate cortex

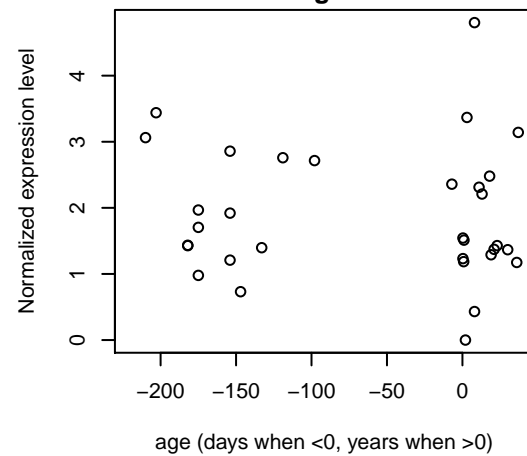

**CTH\_70887248\_70887358**  
(P=0.4241, Diff = 0.52)  
anterior cingulate cortex

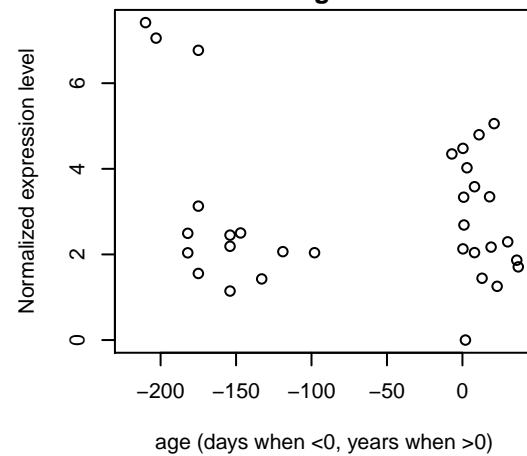

**CTH\_70889967\_70890099**  
(P=0.882, Diff = -0.08)  
anterior cingulate cortex

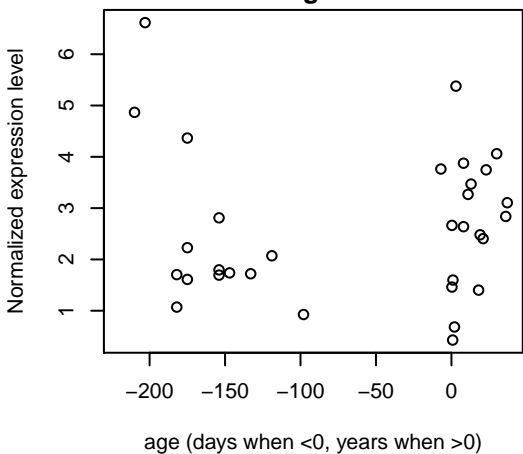

**CTH\_70895476\_70895534**  
(P=0.1689, Diff = 0.9)  
anterior cingulate cortex

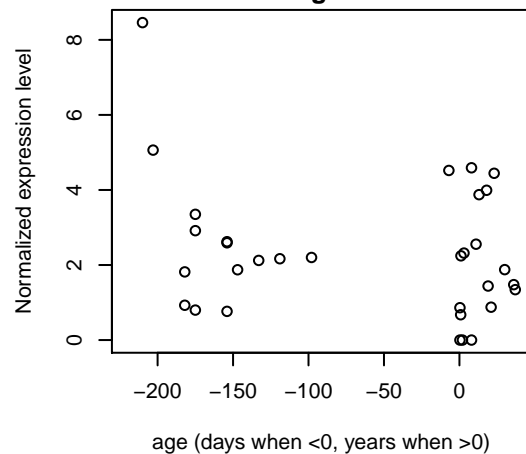

**CTH\_70895999\_70896077**  
(P=0.759, Diff = 0.14)  
anterior cingulate cortex

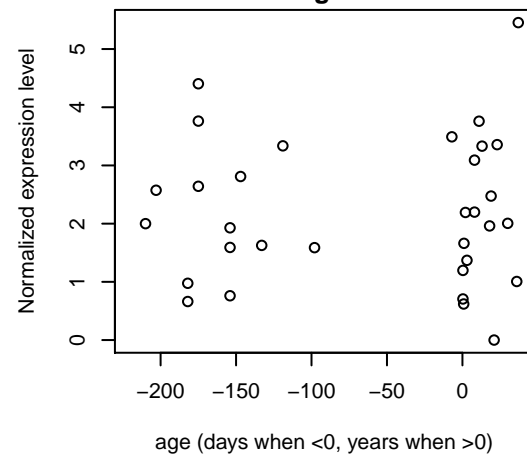

**CTH\_70897765\_70897918**  
(P=0.4049, Diff = 0.47)  
anterior cingulate cortex

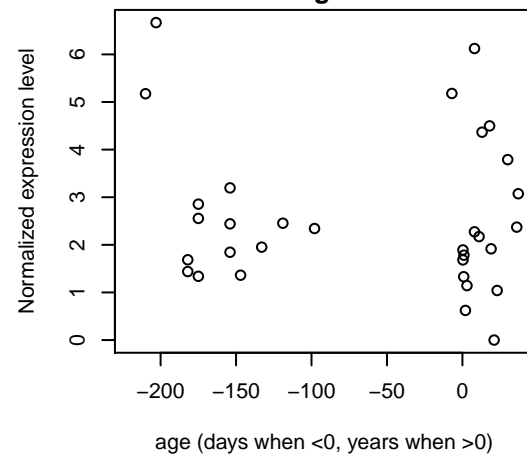

**CTH\_70899510\_70899632**  
(P=0.9092, Diff = 0.1)  
anterior cingulate cortex

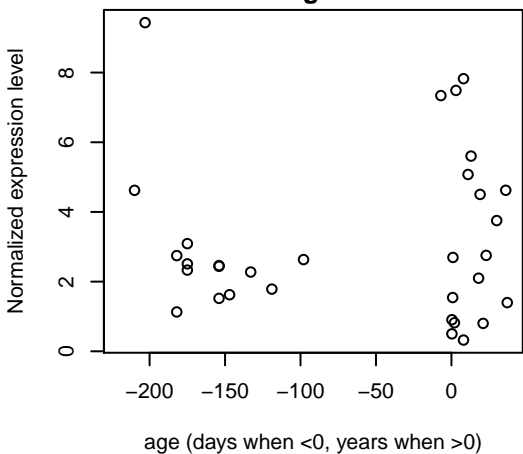

**CTH\_70900533\_70900860**  
(P=0.6729, Diff = -0.06)  
anterior cingulate cortex

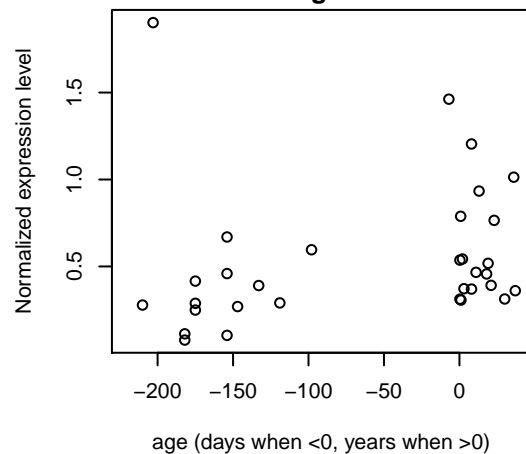

**CTH\_70904370\_70904509**  
(P=0.4744, Diff = -0.71)  
anterior cingulate cortex

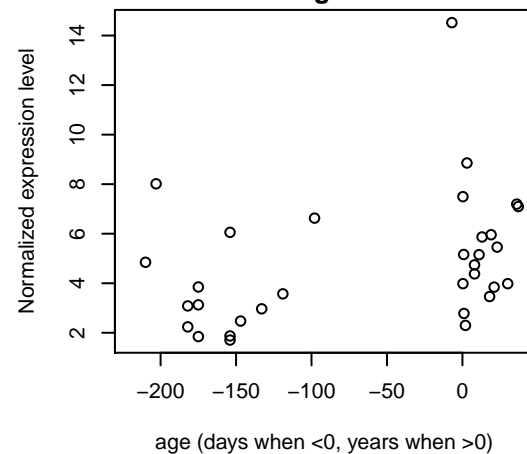

**CTH\_70904783\_70905534**  
(P=0.2735, Diff = -0.35)  
anterior cingulate cortex

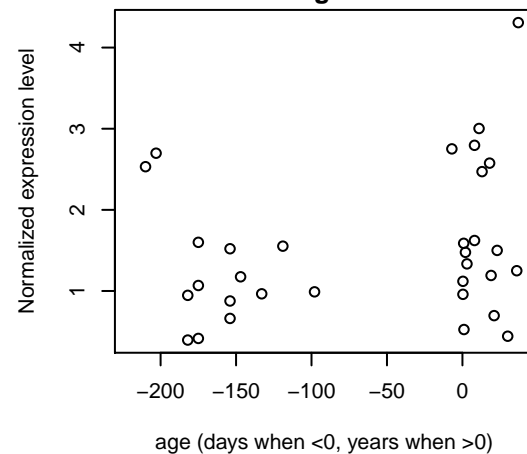

**SEC14L5\_5008317\_5008446**  
( $P=0.044$ , Diff =  $-0.69$ )  
anterior cingulate cortex

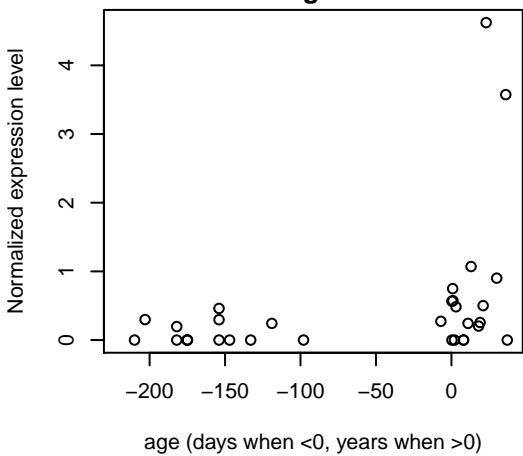

**SEC14L5\_5009273\_5009387**  
( $P=4e-04$ , Diff =  $-2.41$ )  
anterior cingulate cortex

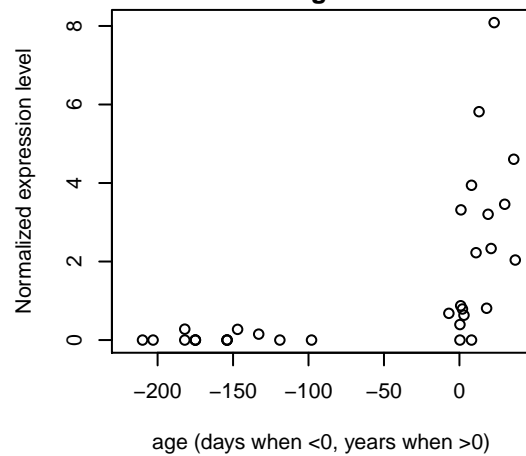

**SEC14L5\_5037557\_5037707**  
( $P=0.0022$ , Diff =  $-1.72$ )  
anterior cingulate cortex

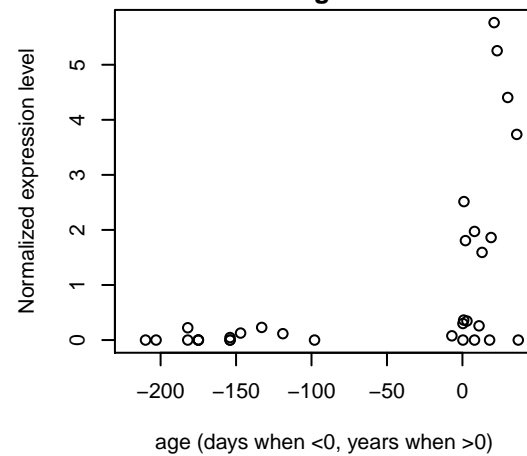

**SEC14L5\_5038149\_5038281**  
( $P=0.0022$ , Diff =  $-4.4$ )  
anterior cingulate cortex

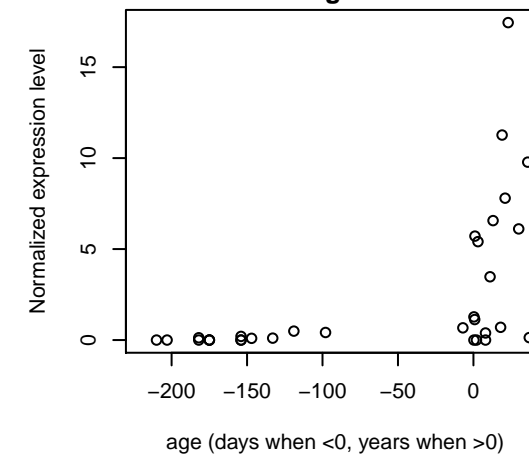

**SEC14L5\_5040767\_5040896**  
( $P=0.0014$ , Diff =  $-3.91$ )  
anterior cingulate cortex

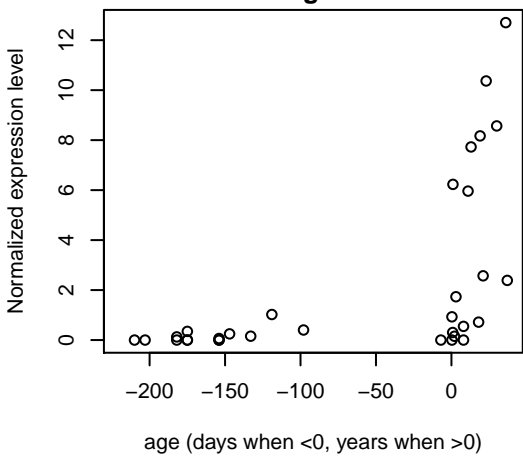

**SEC14L5\_5041838\_5042031**  
( $P=0.002$ , Diff =  $-4.26$ )  
anterior cingulate cortex

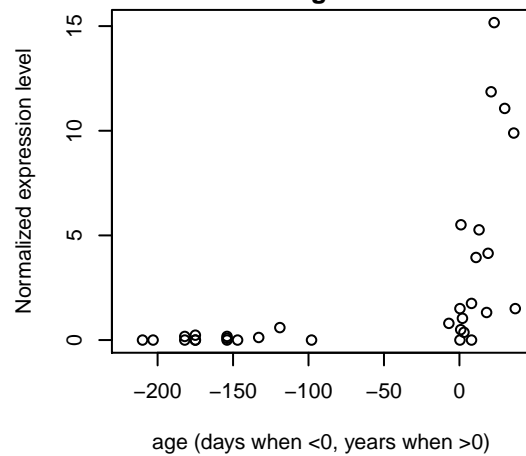

**SEC14L5\_5046348\_5046461**  
( $P=0.0012$ , Diff =  $-3.13$ )  
anterior cingulate cortex

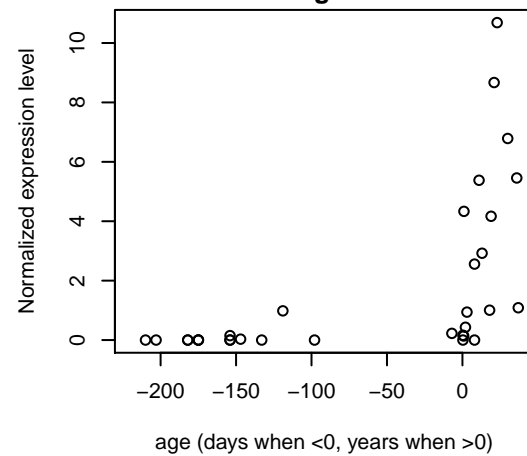

**SEC14L5\_5046855\_5047045**  
( $P=4e-04$ , Diff =  $-4.5$ )  
anterior cingulate cortex

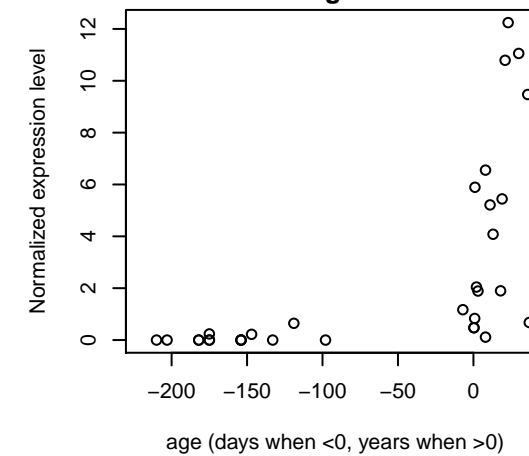

**SEC14L5\_5050655\_5050744**  
( $P=8e-04$ , Diff =  $-2.78$ )  
anterior cingulate cortex

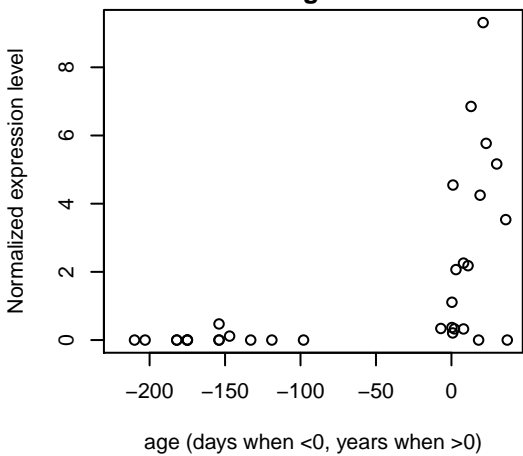

**SEC14L5\_5050855\_5050926**  
( $P=0.0051$ , Diff =  $-3.87$ )  
anterior cingulate cortex

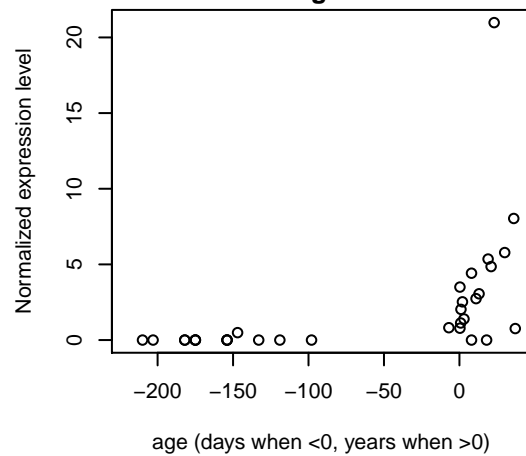

**SEC14L5\_5053402\_5053574**  
( $P=0.0018$ , Diff =  $-3.48$ )  
anterior cingulate cortex

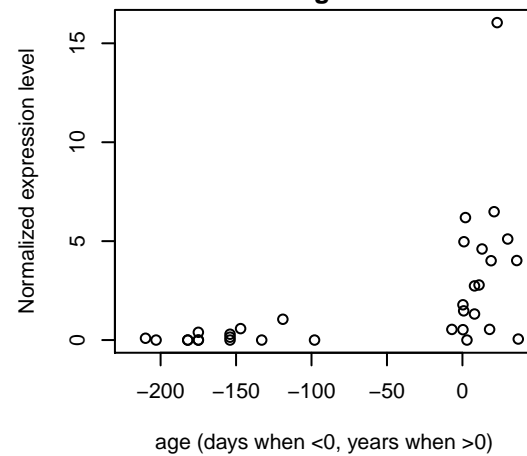

**SEC14L5\_5055914\_5056049**  
( $P=0.0013$ , Diff =  $-4.18$ )  
anterior cingulate cortex

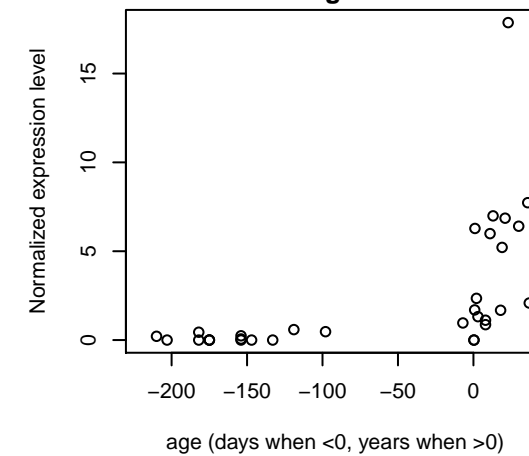

**SEC14L5\_5057352\_5057487**  
( $P=7e-04$ , Diff =  $-3.97$ )  
anterior cingulate cortex

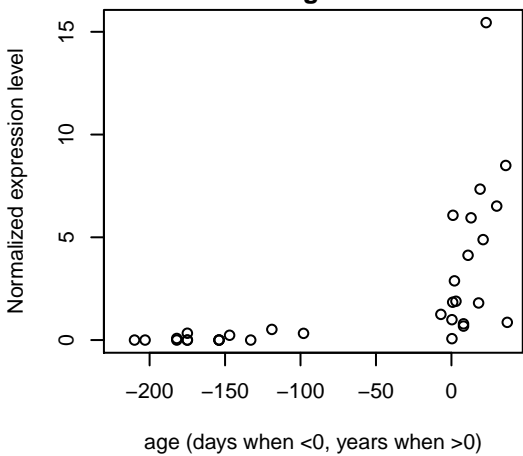

**SEC14L5\_5058421\_5058649**  
( $P=5e-04$ , Diff =  $-2.81$ )  
anterior cingulate cortex

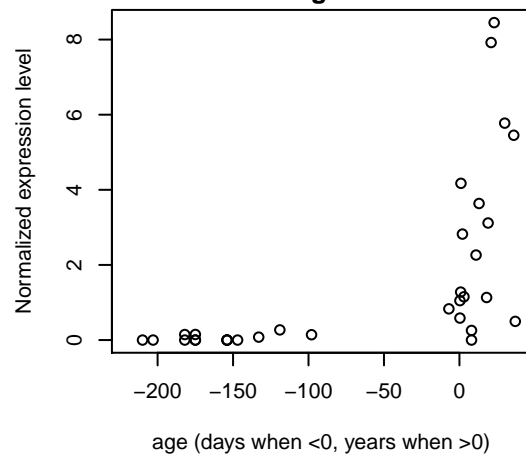

**SEC14L5\_5061095\_5061274**  
( $P=9e-04$ , Diff =  $-3.65$ )  
anterior cingulate cortex

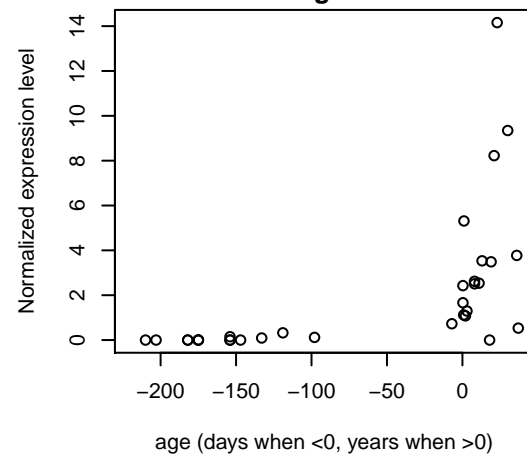

**SEC14L5\_5064859\_5069156**  
( $P=1e-04$ , Diff =  $-6.95$ )  
anterior cingulate cortex

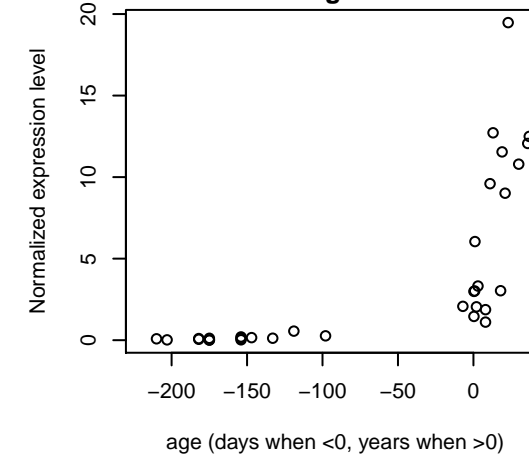

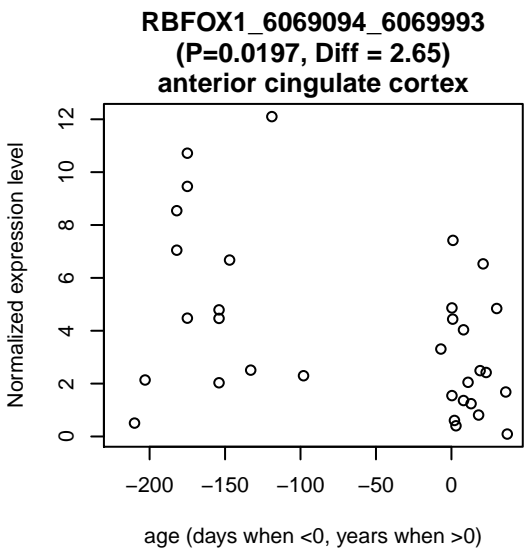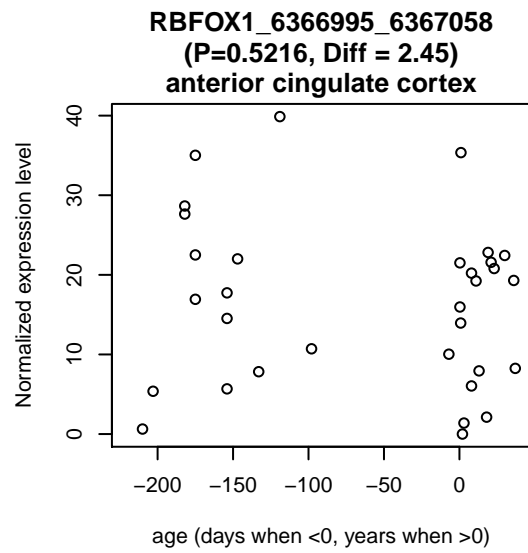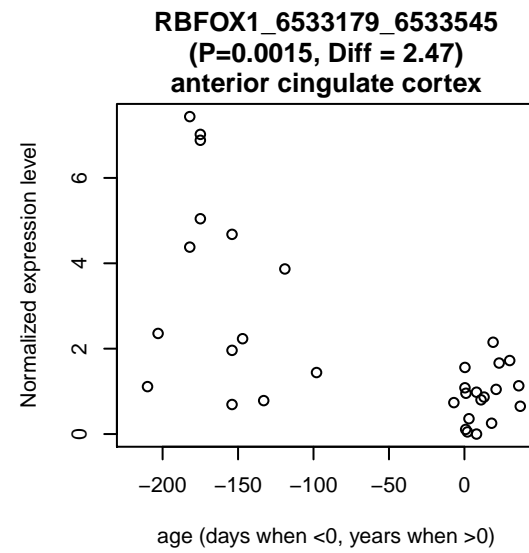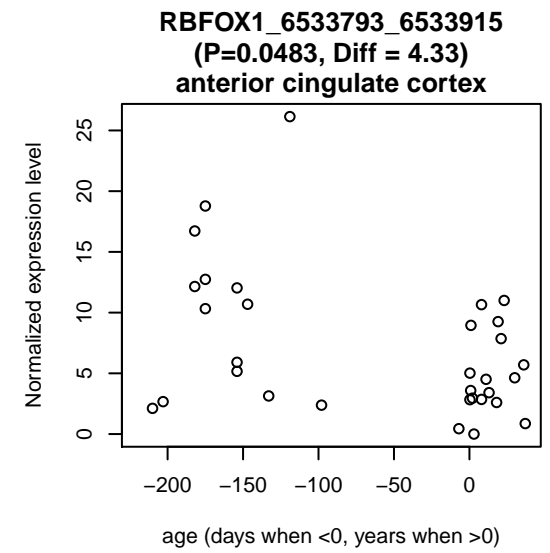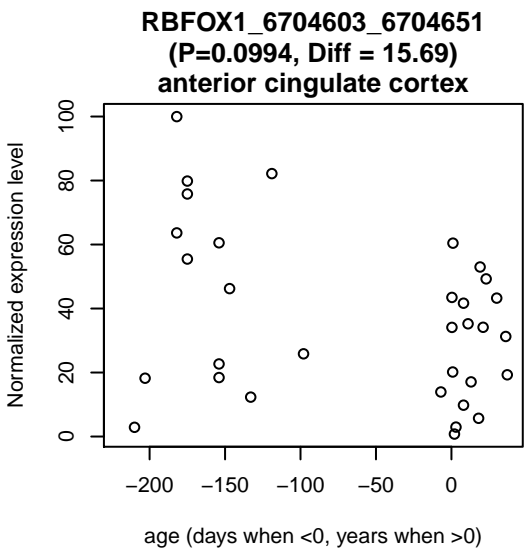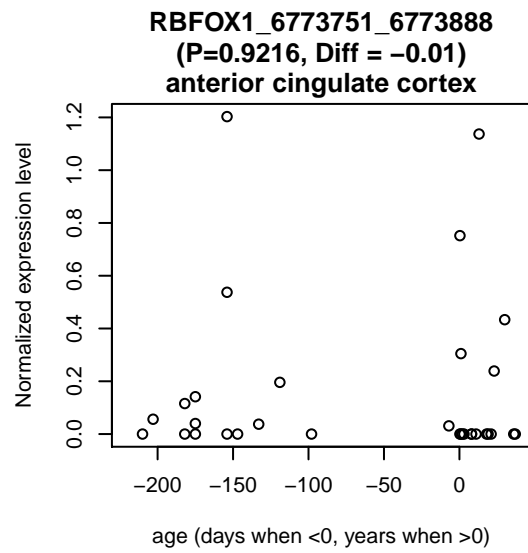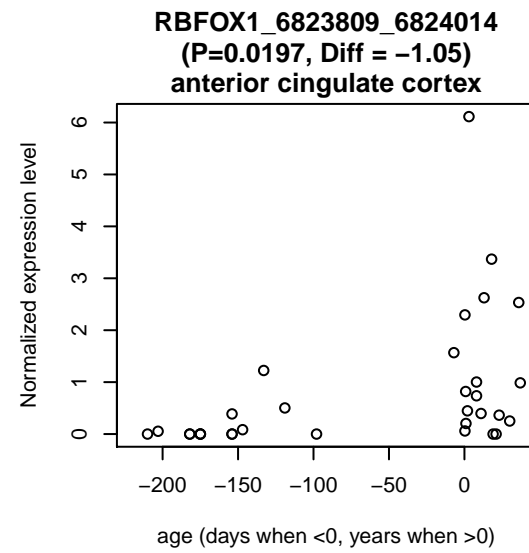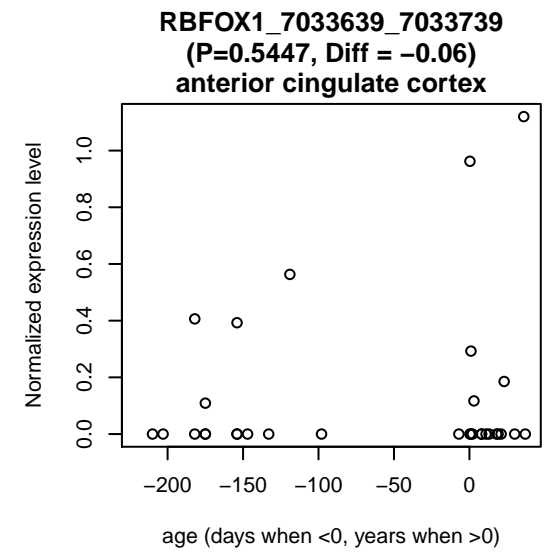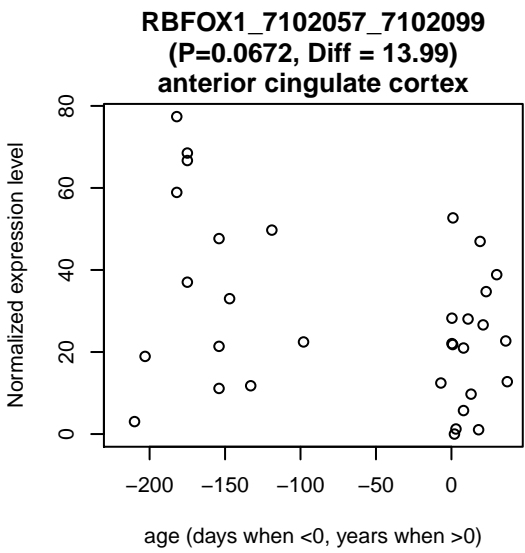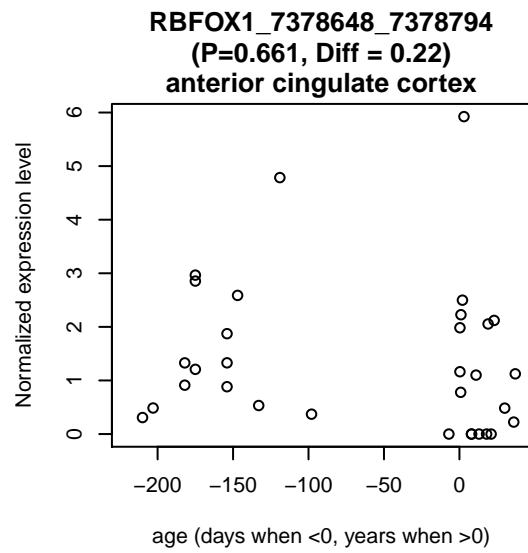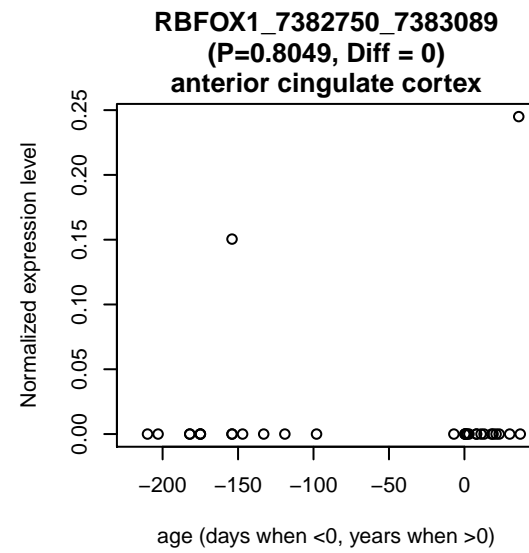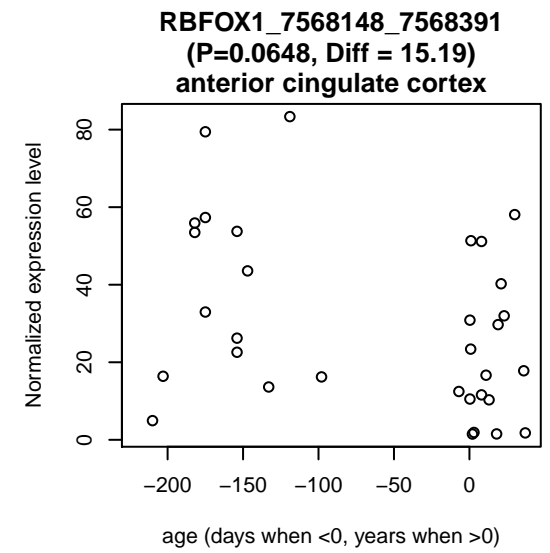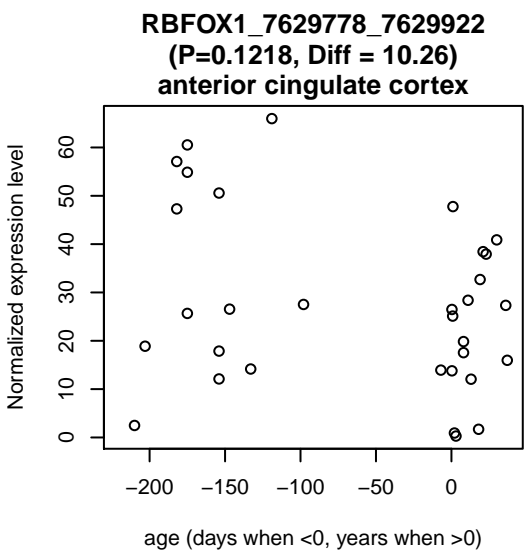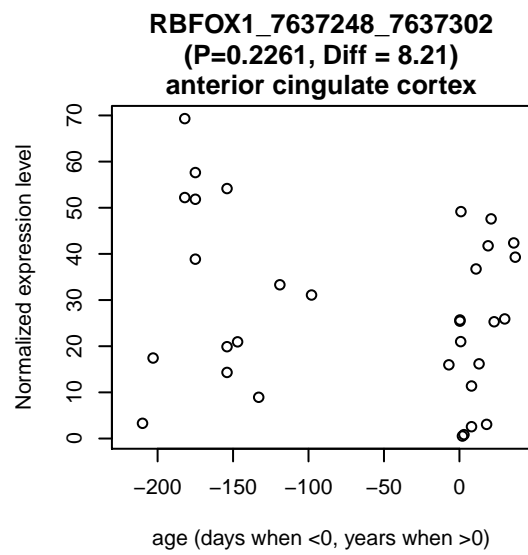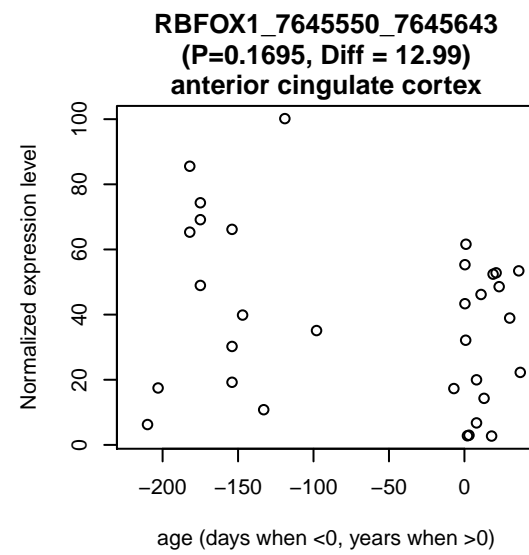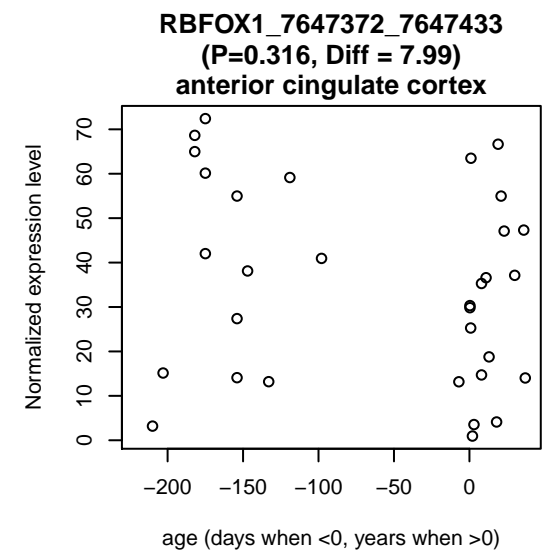

**RBFOX1\_7657286\_7657340**  
(P=0.5195, Diff = 6.27)  
anterior cingulate cortex

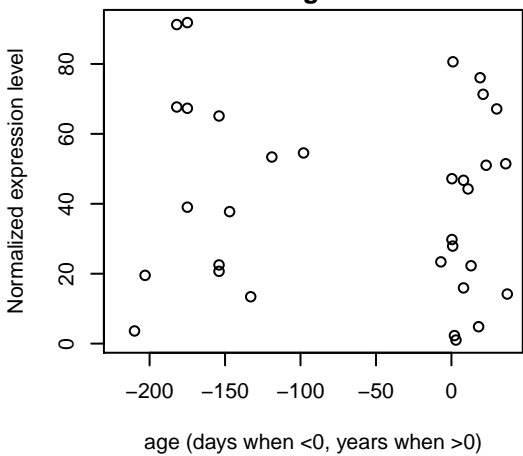

**RBFOX1\_7680604\_7680685**  
(P=0.6883, Diff = 3.34)  
anterior cingulate cortex

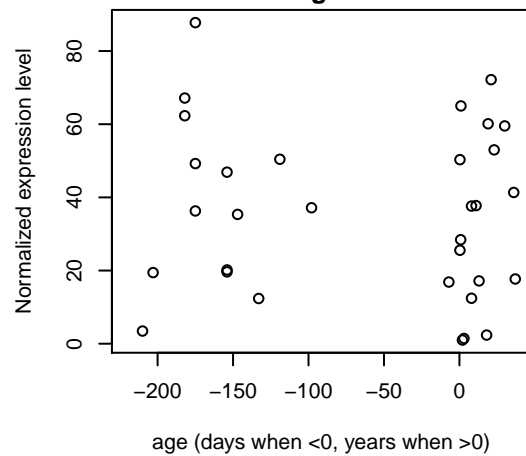

**RBFOX1\_7703816\_7703949**  
(P=0.5867, Diff = 2.41)  
anterior cingulate cortex

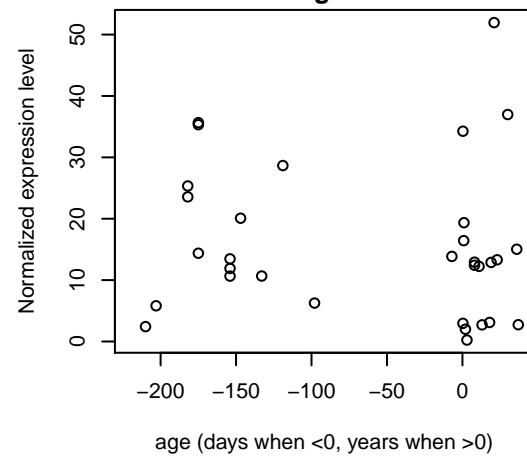

**RBFOX1\_7714930\_7714970**  
(P=0.5655, Diff = 3.12)  
anterior cingulate cortex

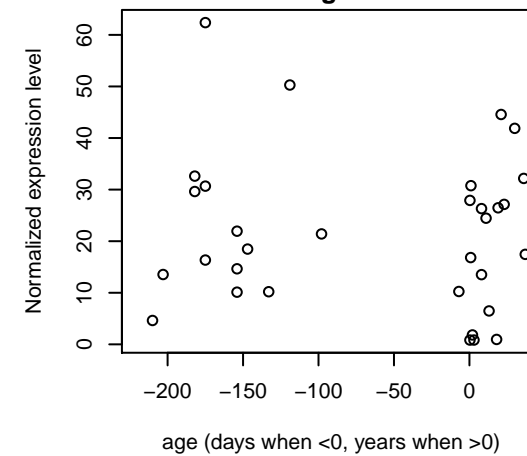

**RBFOX1\_7721558\_7721601**  
(P=0.224, Diff = -0.17)  
anterior cingulate cortex

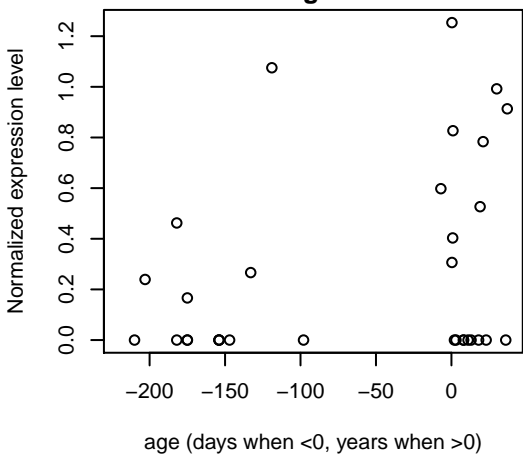

**RBFOX1\_7726775\_7726840**  
(P=0.1607, Diff = 11.95)  
anterior cingulate cortex

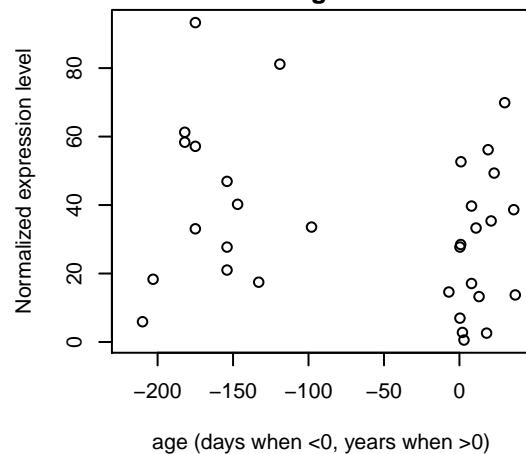

**RBFOX1\_7743316\_7743369**  
(P=0.8557, Diff = -0.73)  
anterior cingulate cortex

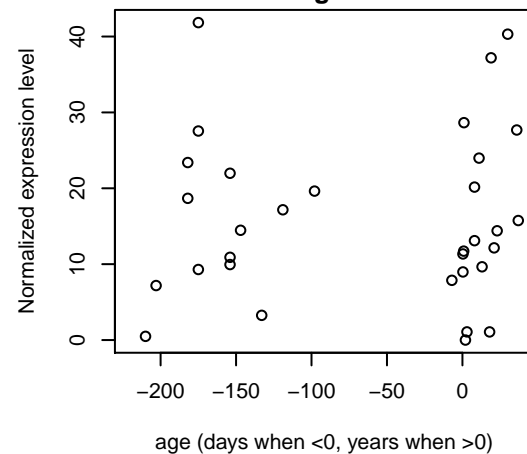

**RBFOX1\_7759057\_7759133**  
(P=0.393, Diff = 7.98)  
anterior cingulate cortex

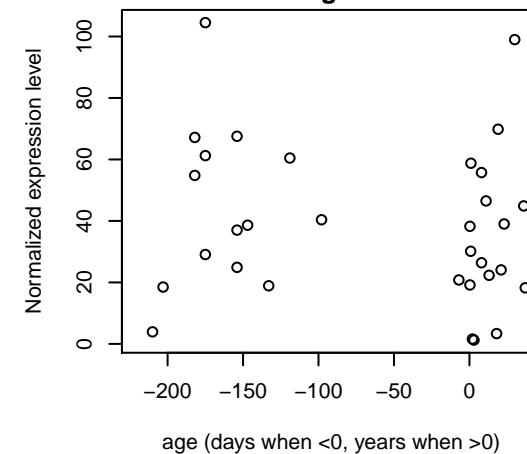

**RBFOX1\_7759495\_7763340**  
(P=0.836, Diff = -1.2)  
anterior cingulate cortex

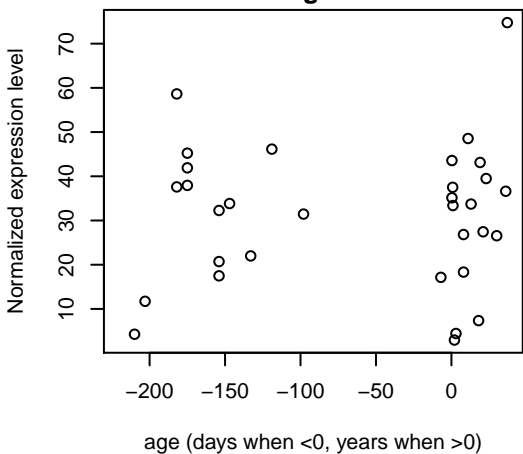



**TBX4\_59529778\_59529938**  
(P=NaN, Diff = 0)  
anterior cingulate cortex

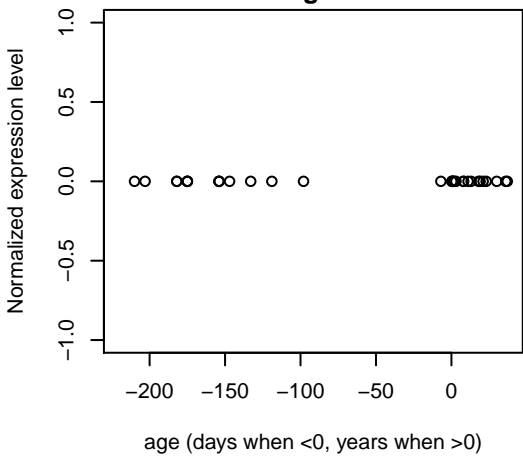

**TBX4\_59533806\_59534037**  
(P=0.3322, Diff = -0.02)  
anterior cingulate cortex

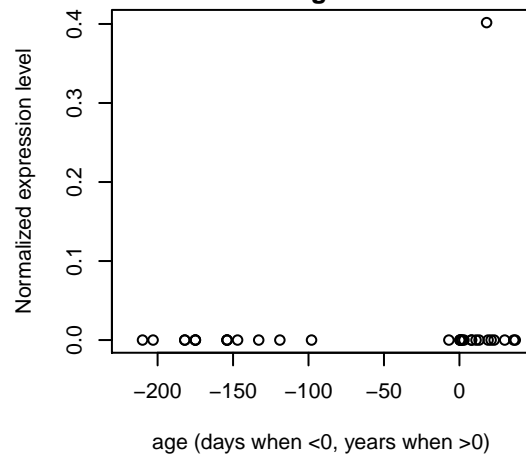

**TBX4\_59534897\_59534992**  
(P=0.1703, Diff = -0.06)  
anterior cingulate cortex

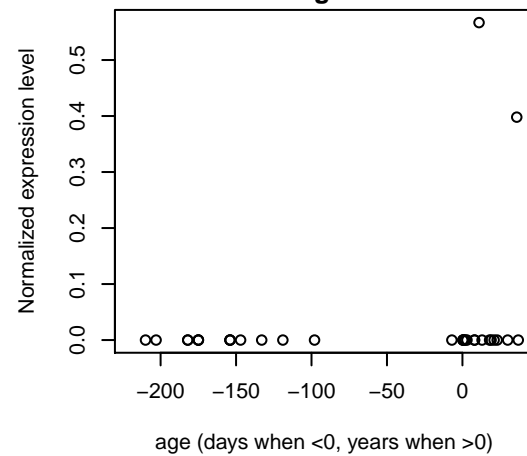

**TBX4\_59543179\_59543299**  
(P=NaN, Diff = 0)  
anterior cingulate cortex

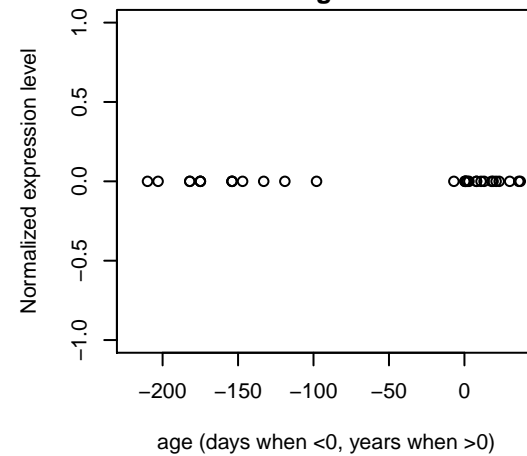

**TBX4\_59544870\_59545018**  
(P=0.3322, Diff = -0.01)  
anterior cingulate cortex

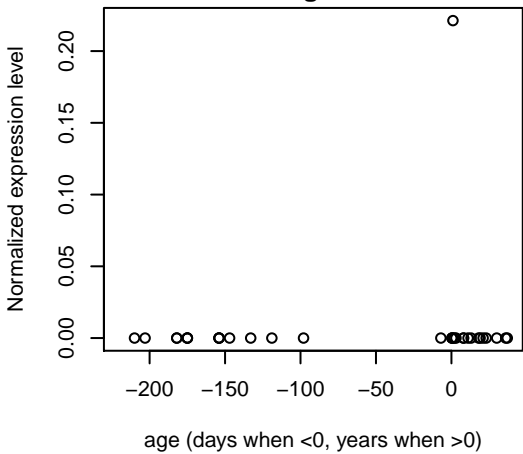

**TBX4\_59555987\_59556140**  
(P=0.3322, Diff = 0)  
anterior cingulate cortex

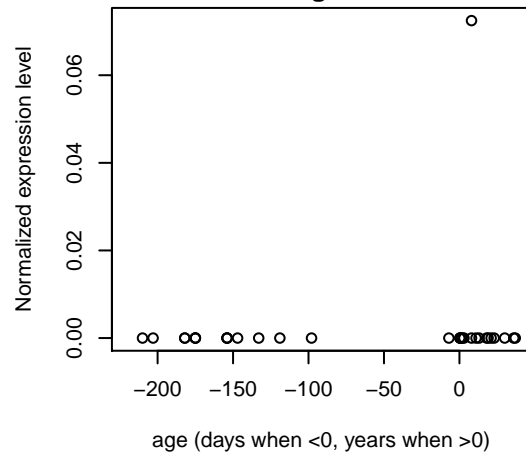

**TBX4\_59557241\_59557330**  
(P=NaN, Diff = 0)  
anterior cingulate cortex

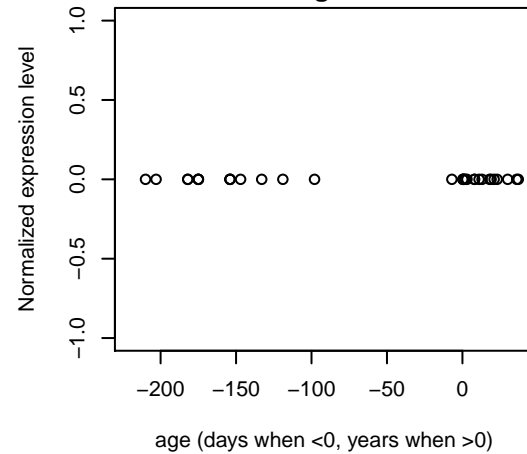

**TBX4\_59557450\_59557680**  
(P=NaN, Diff = 0)  
anterior cingulate cortex

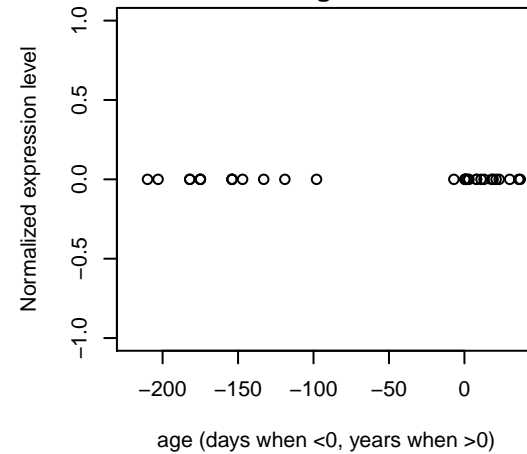

**TBX4\_59560257\_59562469**  
(P=0.0736, Diff = -0.01)  
anterior cingulate cortex

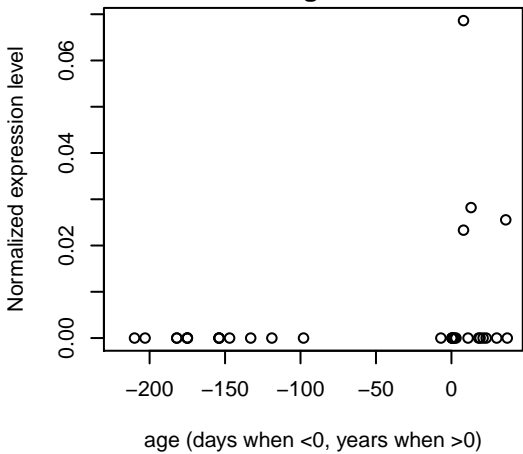

**FRG1\_190861942\_190862226**  
( $P=2e-04$ , Diff = 9.37)  
anterior cingulate cortex

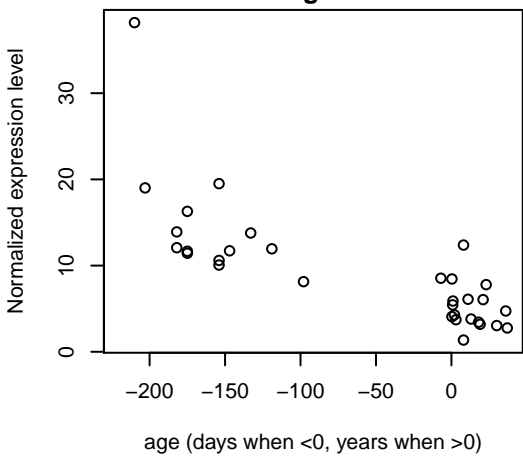

**FRG1\_190862987\_190863159**  
( $P=0.4032$ , Diff = -0.03)  
anterior cingulate cortex

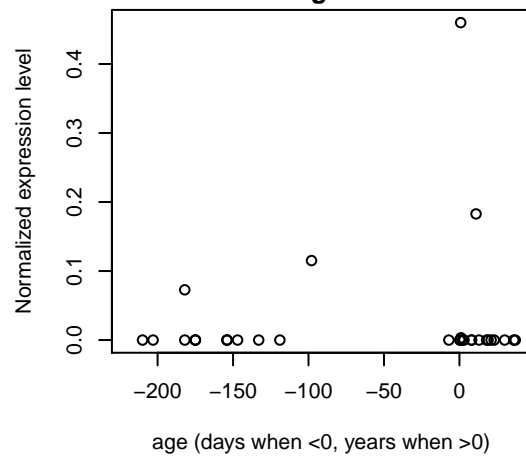

**FRG1\_190864356\_190864427**  
( $P=9e-04$ , Diff = 8.96)  
anterior cingulate cortex

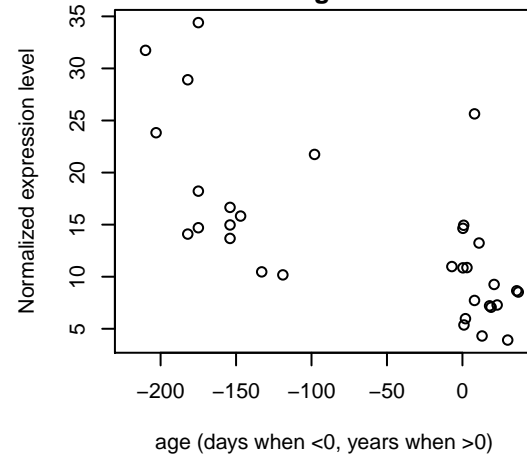

**FRG1\_190873316\_190873442**  
( $P=7e-04$ , Diff = 19.37)  
anterior cingulate cortex

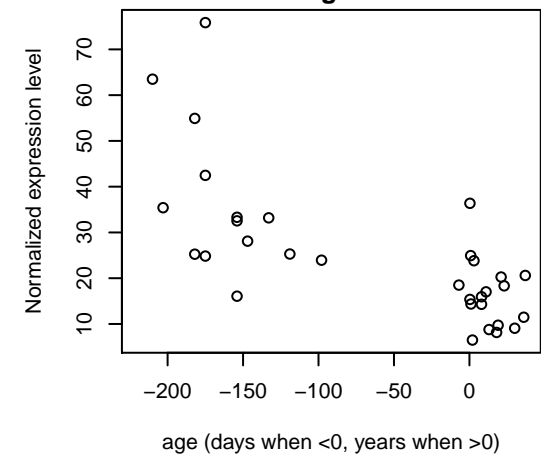

**FRG1\_190874222\_190874280**  
( $P=0$ , Diff = 13.4)  
anterior cingulate cortex

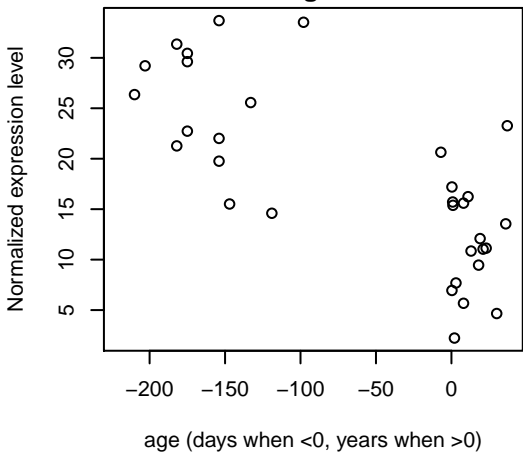

**FRG1\_190876191\_190876306**  
( $P=4e-04$ , Diff = 11.97)  
anterior cingulate cortex

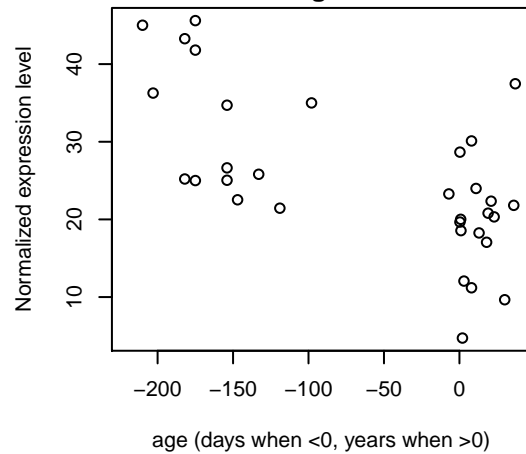

**FRG1\_190878552\_190878657**  
( $P=0.0068$ , Diff = 5.18)  
anterior cingulate cortex

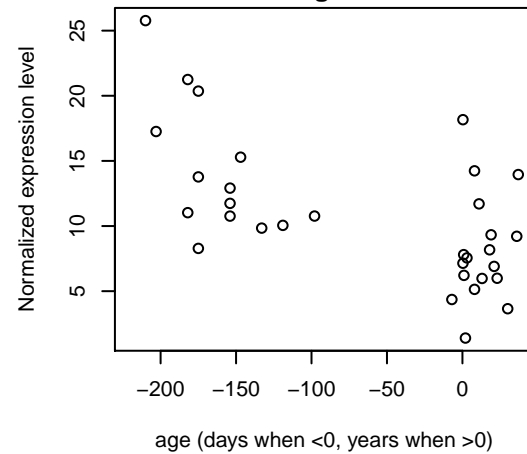

**FRG1\_190881902\_190881994**  
( $P=0.003$ , Diff = 5.61)  
anterior cingulate cortex

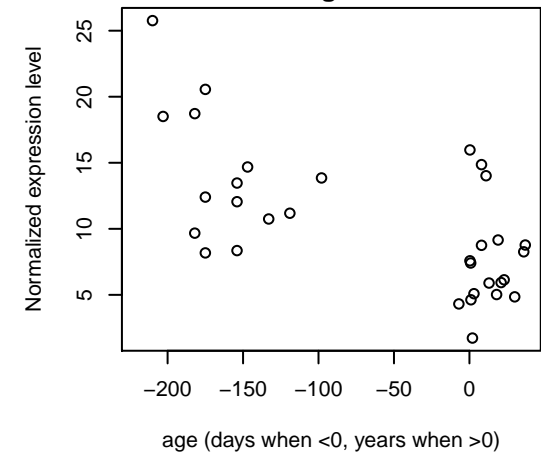

**FRG1\_190882016\_190882355**  
( $P=0.1716$ , Diff = 0.22)  
anterior cingulate cortex

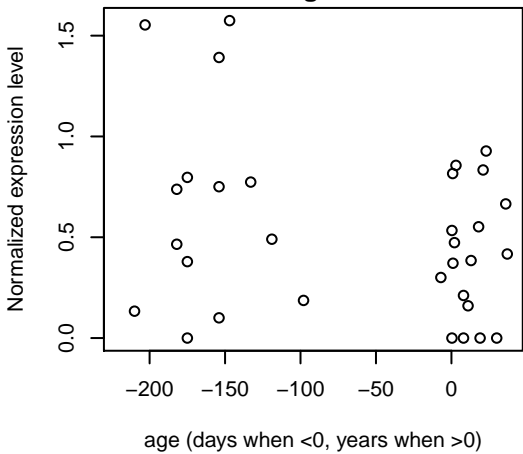

**FRG1\_190882583\_190882705**  
( $P=0.0763$ , Diff = 0.19)  
anterior cingulate cortex

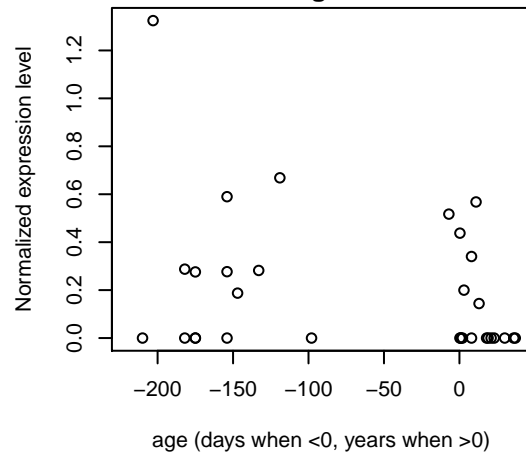

**FRG1\_190882976\_190883087**  
( $P=0.0048$ , Diff = 17.54)  
anterior cingulate cortex

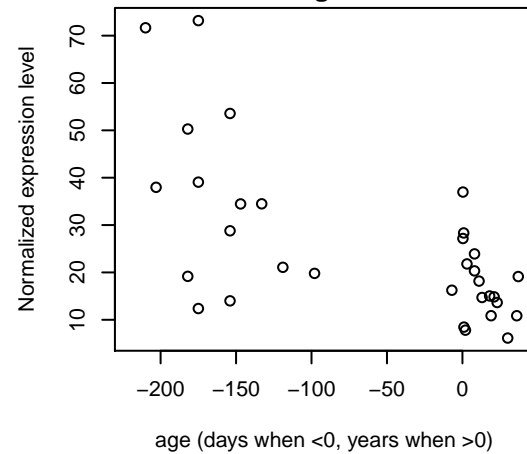

**FRG1\_190884247\_190884359**  
( $P=0.0073$ , Diff = 10.45)  
anterior cingulate cortex

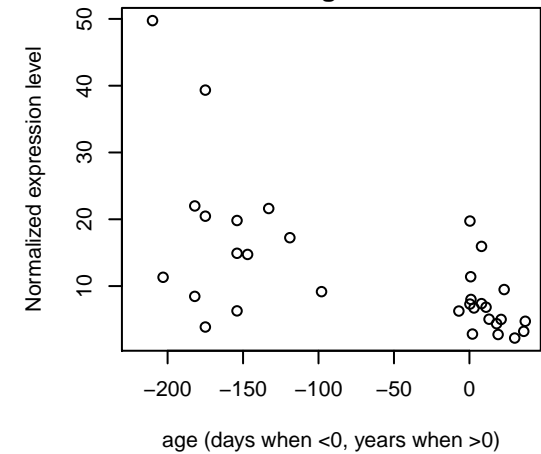

**METTL4\_2537523\_2539144**  
( $P=0.3547$ , Diff = 0.33)  
anterior cingulate cortex

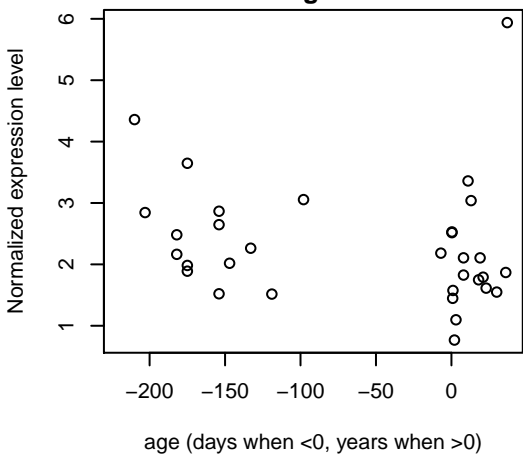

**METTL4\_2544193\_2544285**  
( $P=0.0578$ , Diff = 0.9)  
anterior cingulate cortex

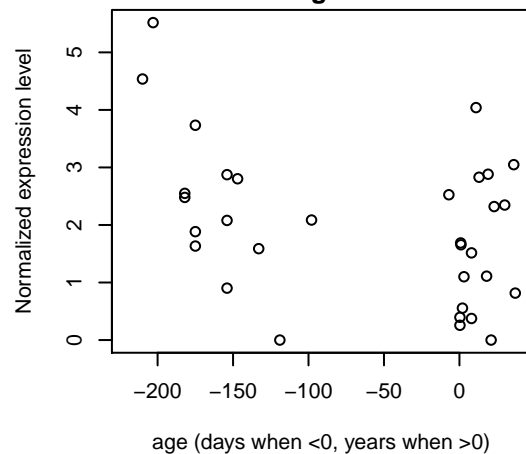

**METTL4\_2544651\_2544758**  
( $P=0.2577$ , Diff = 0.51)  
anterior cingulate cortex

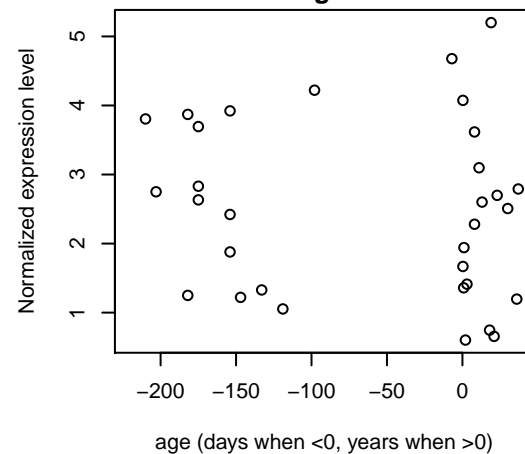

**METTL4\_2547353\_2547528**  
( $P=0.0331$ , Diff = 1.09)  
anterior cingulate cortex

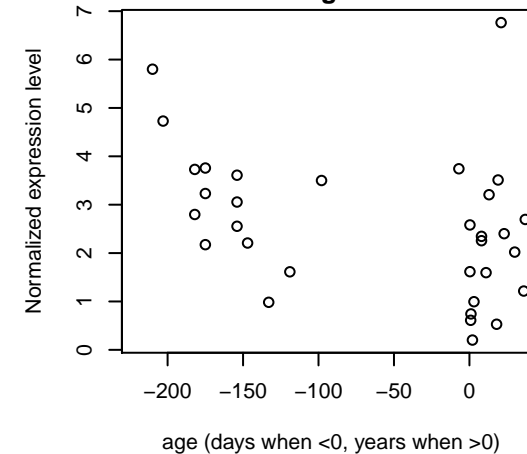

**METTL4\_2552693\_2552763**  
( $P=0.1312$ , Diff = 1.04)  
anterior cingulate cortex

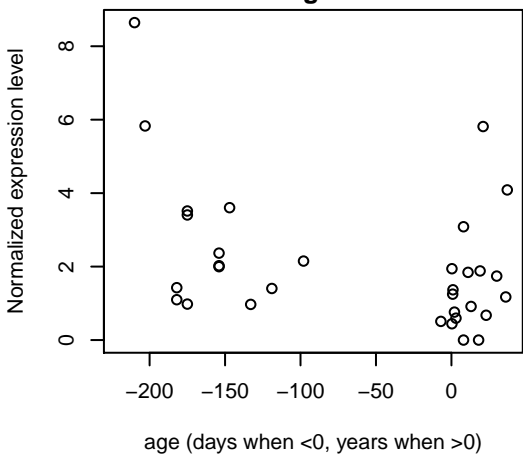

**METTL4\_2554667\_2555037**  
( $P=0.1255$ , Diff = 0.78)  
anterior cingulate cortex

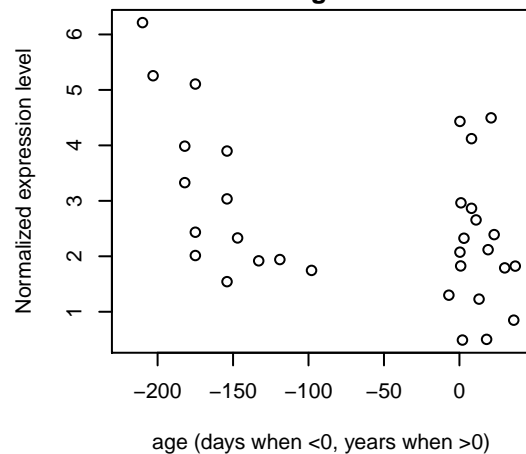

**METTL4\_2563795\_2563858**  
( $P=0.0931$ , Diff = 1.01)  
anterior cingulate cortex

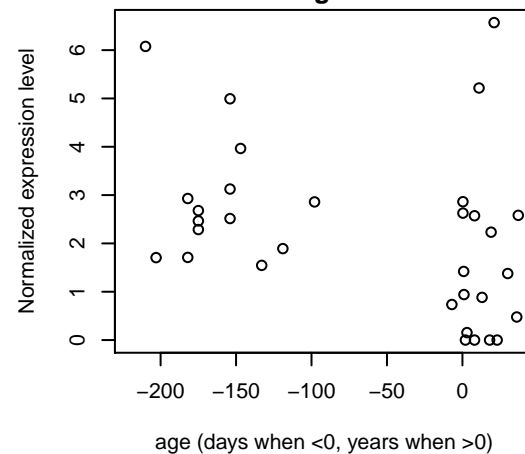

**METTL4\_2566819\_2567653**  
( $P=1e-04$ , Diff = 1.69)  
anterior cingulate cortex

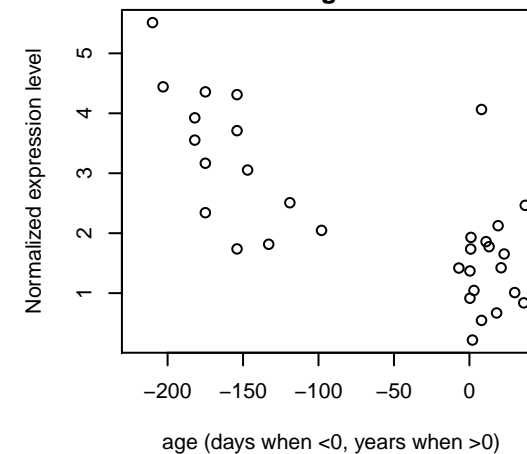

**METTL4\_2571147\_2571508**  
( $P=3e-04$ , Diff = 1.14)  
anterior cingulate cortex

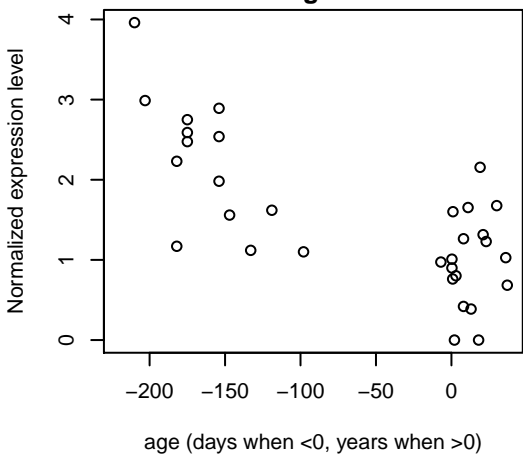

**C7orf11\_40172341\_40172858**  
**(P=0.0038, Diff = 9.88)**  
**anterior cingulate cortex**

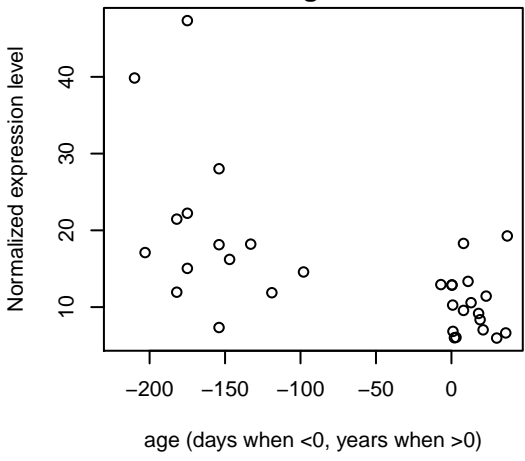

**C7orf11\_40173827\_40174258**  
**(P=8e-04, Diff = 7.73)**  
**anterior cingulate cortex**

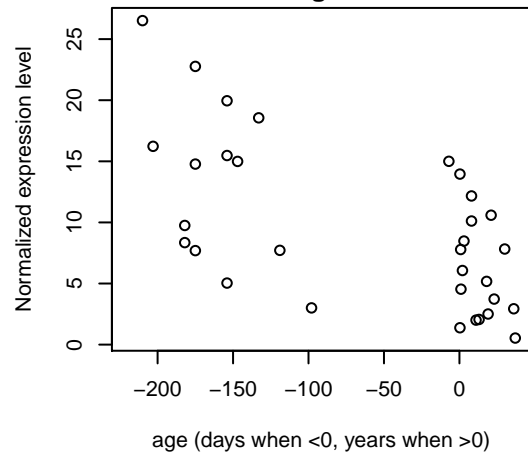

**KLF13\_31619057\_31619992**  
( $P=1e-04$ , Diff = -5.34)  
cerebellar cortex

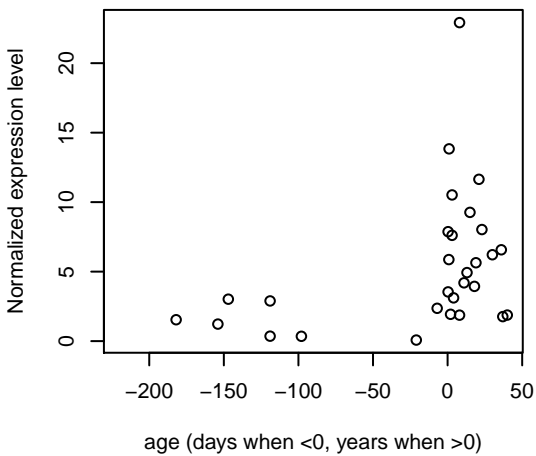

**KLF13\_31632135\_31632190**  
( $P=0.1703$ , Diff = -0.05)  
cerebellar cortex

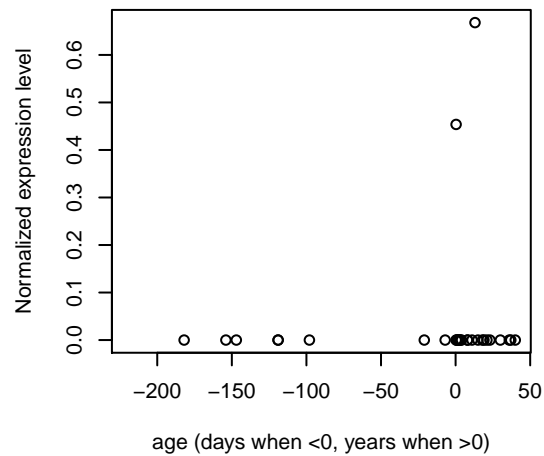

**KLF13\_31658356\_31658757**  
( $P=2e-04$ , Diff = -1.12)  
cerebellar cortex

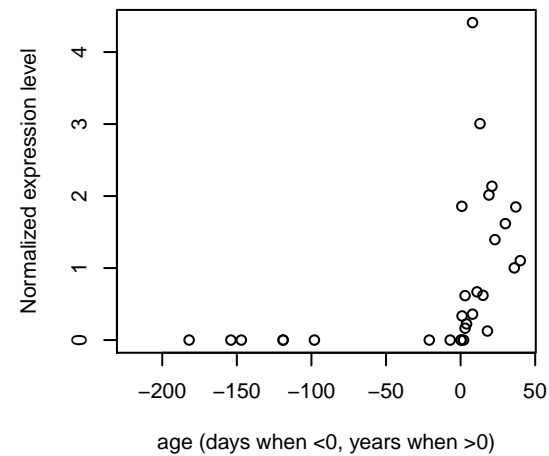

**KLF13\_31664212\_31670102**  
( $P=0$ , Diff = -37.7)  
cerebellar cortex

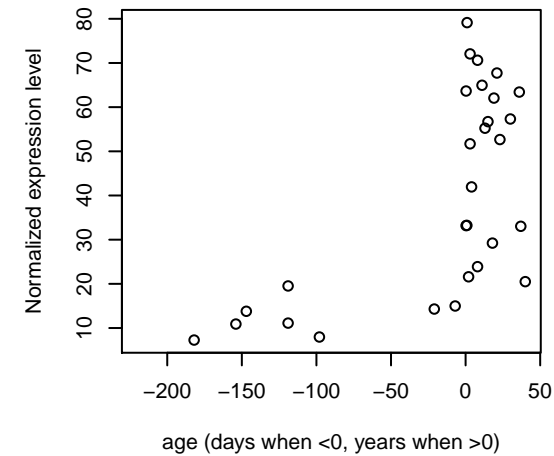

**KLF13\_31685045\_31685458**  
( $P=4e-04$ , Diff = -0.46)  
cerebellar cortex

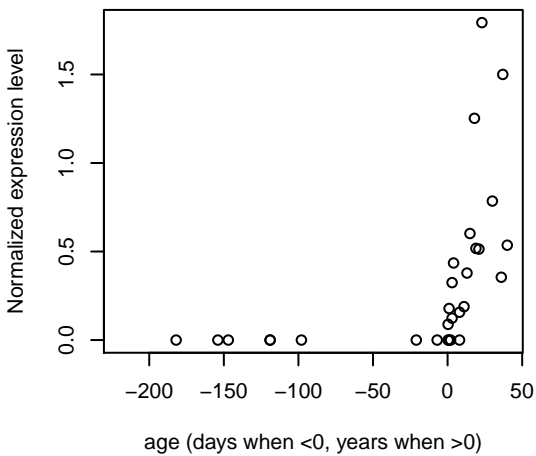

**KLF13\_31685777\_31685894**  
( $P=2e-04$ , Diff = -1.23)  
cerebellar cortex

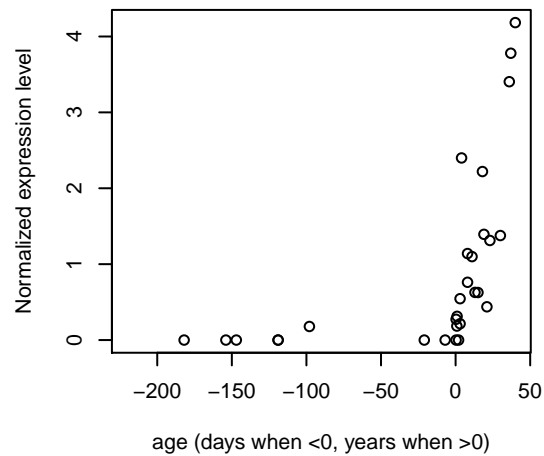

**KLF13\_31695630\_31696113**  
( $P=0$ , Diff = -1.59)  
cerebellar cortex

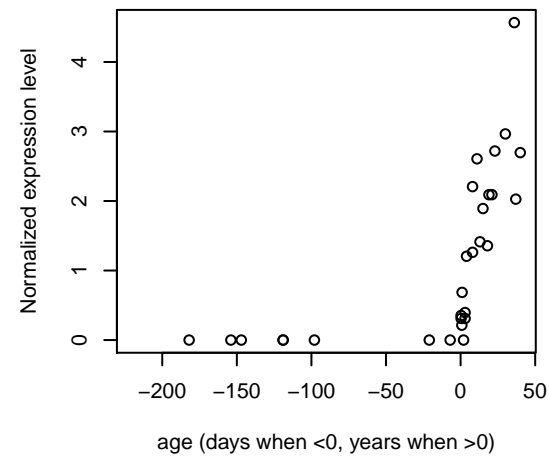

**KLF13\_31727572\_31727868**  
( $P=0.0333$ , Diff = -0.42)  
cerebellar cortex

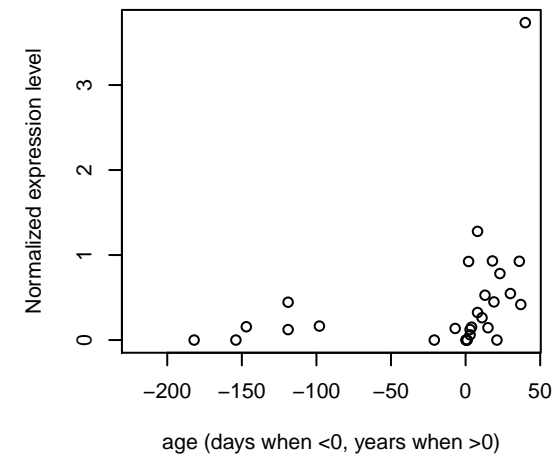

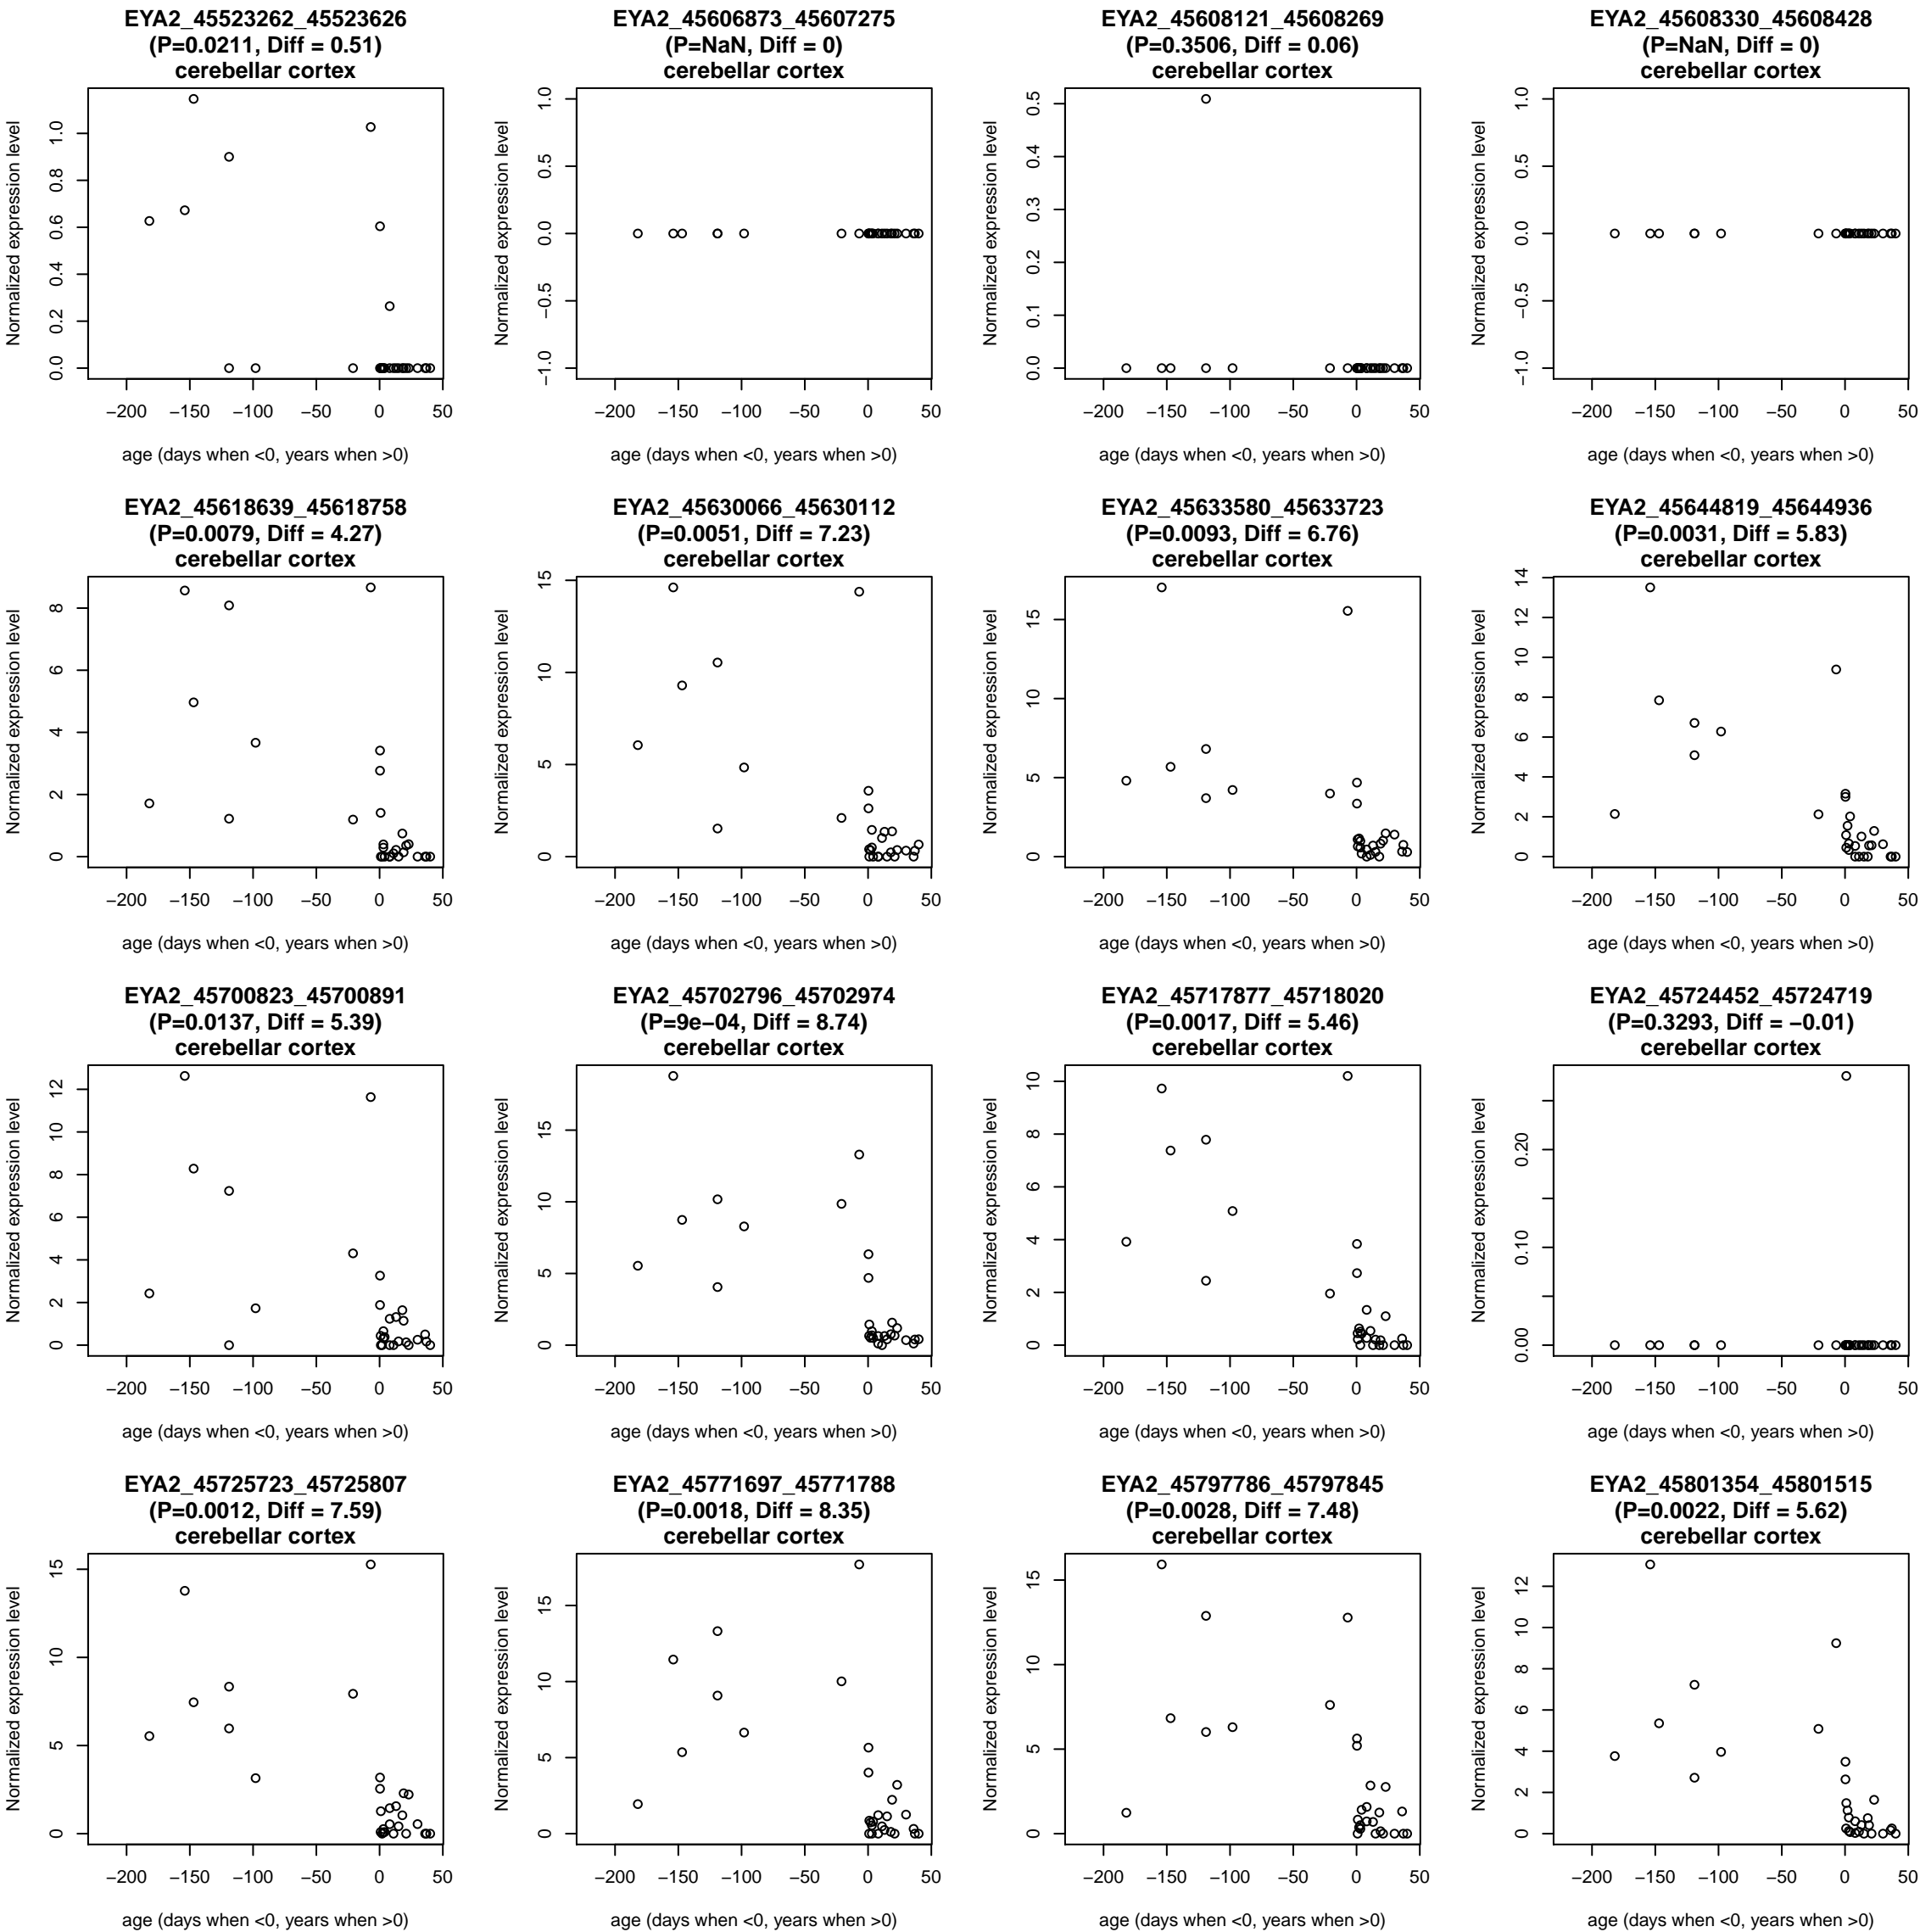

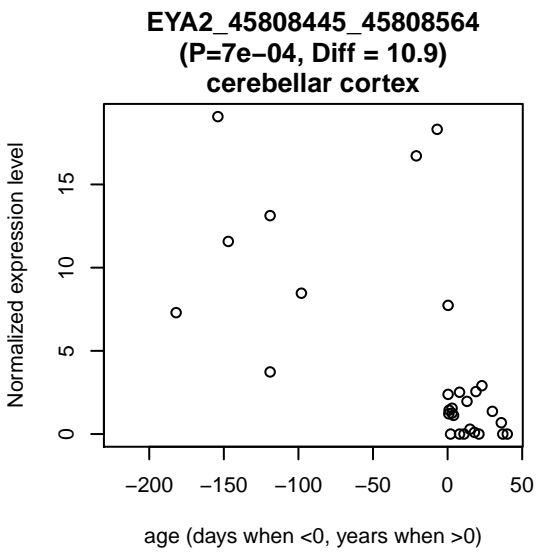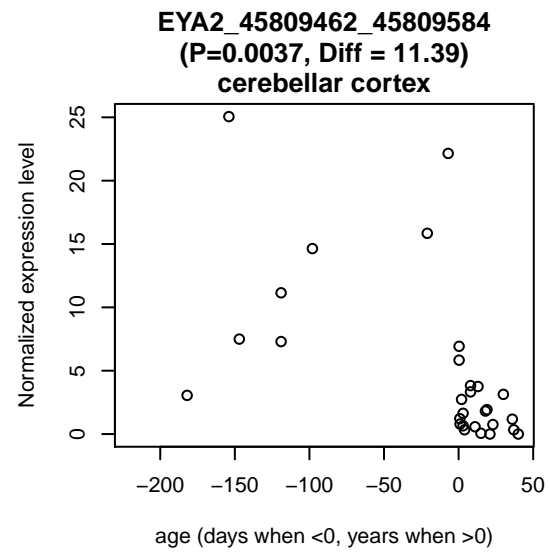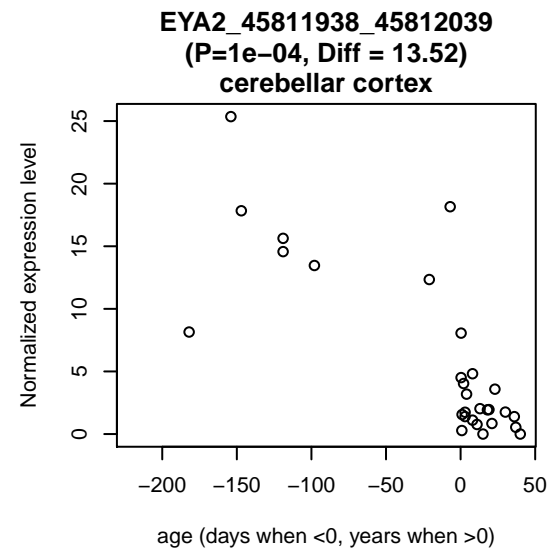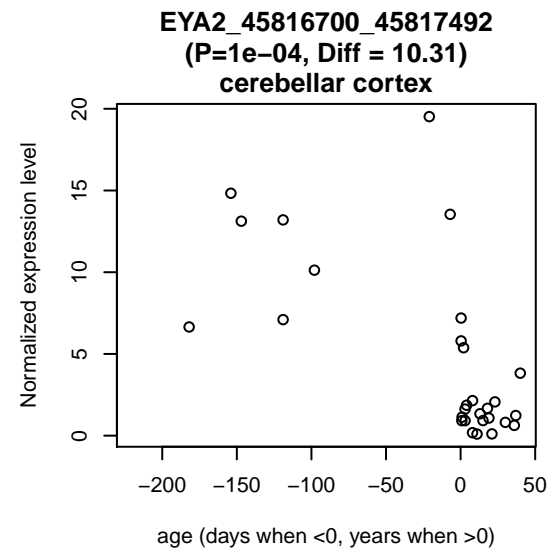

**LMCD1\_8543392\_8543666**  
(P=0.1637, Diff = -1.02)  
cerebellar cortex

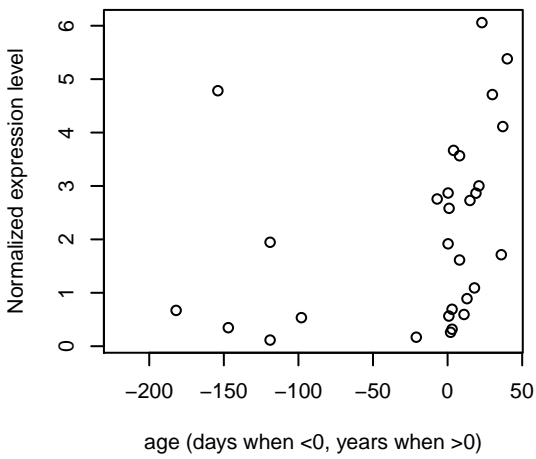

**LMCD1\_8556610\_8556681**  
(P=0.0552, Diff = -0.2)  
cerebellar cortex

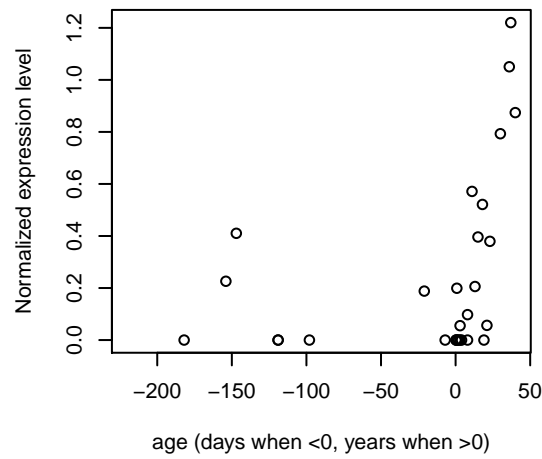

**LMCD1\_8574422\_8574511**  
(P=0.0813, Diff = -4.36)  
cerebellar cortex

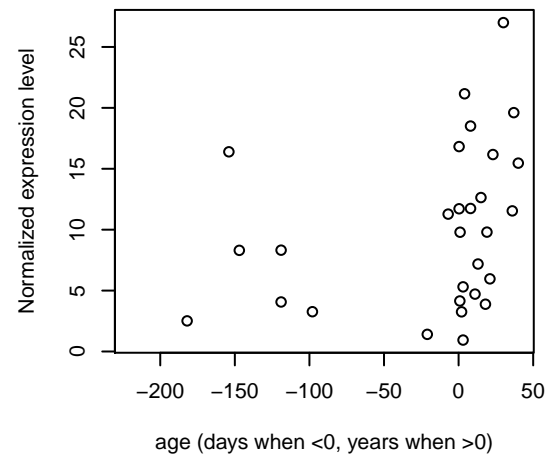

**LMCD1\_8578868\_8579204**  
(P=0.0199, Diff = -4.04)  
cerebellar cortex

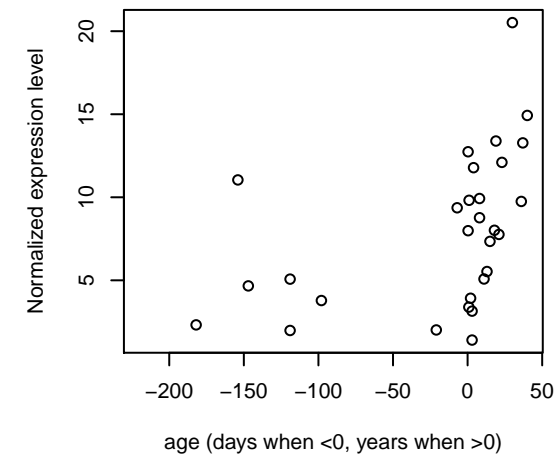

**LMCD1\_8590253\_8590589**  
(P=0.0375, Diff = -4.01)  
cerebellar cortex

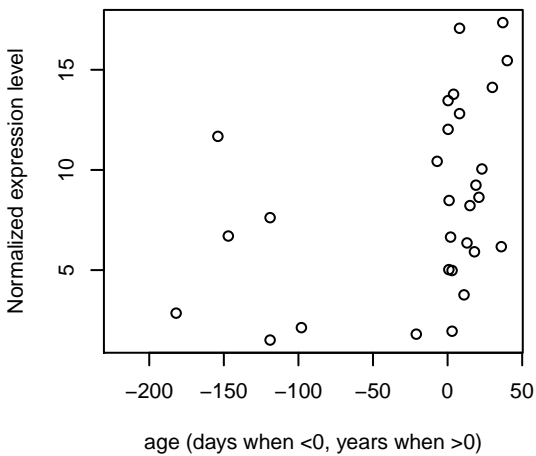

**LMCD1\_8591559\_8592135**  
(P=0.4677, Diff = 0.06)  
cerebellar cortex

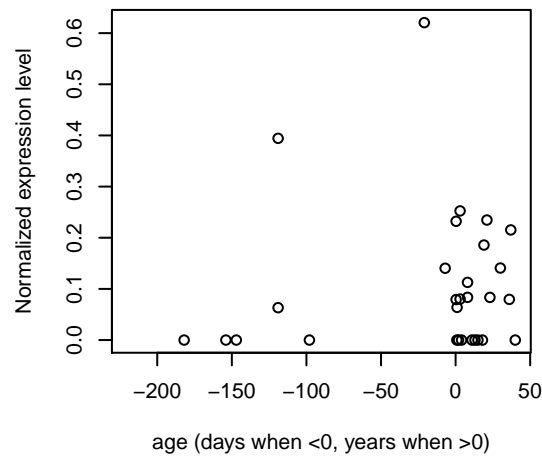

**LMCD1\_8607117\_8607333**  
(P=0.1292, Diff = -2.11)  
cerebellar cortex

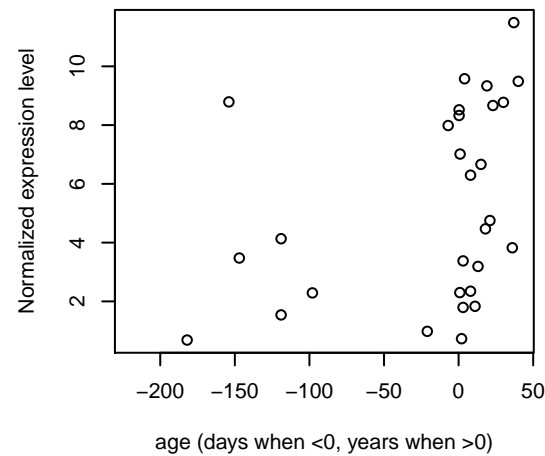

**LMCD1\_8609125\_8609805**  
(P=0.0011, Diff = -6.54)  
cerebellar cortex

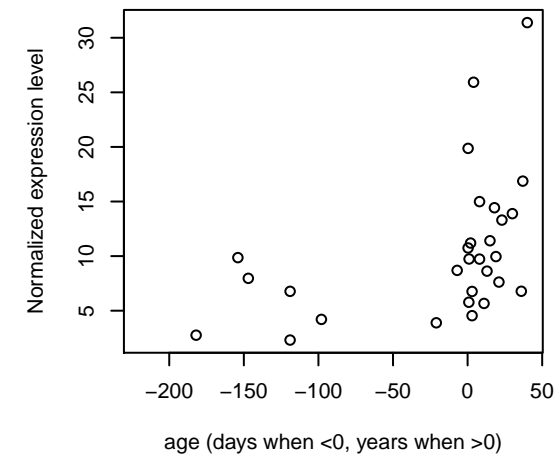



**WVOX\_78133550\_78133782**  
(P=0.0011, Diff = -7.22)  
cerebellar cortex

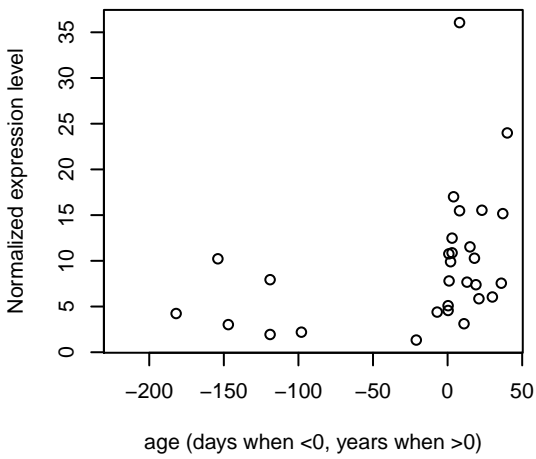

**WVOX\_78142319\_78142384**  
(P=0.0037, Diff = -5.05)  
cerebellar cortex

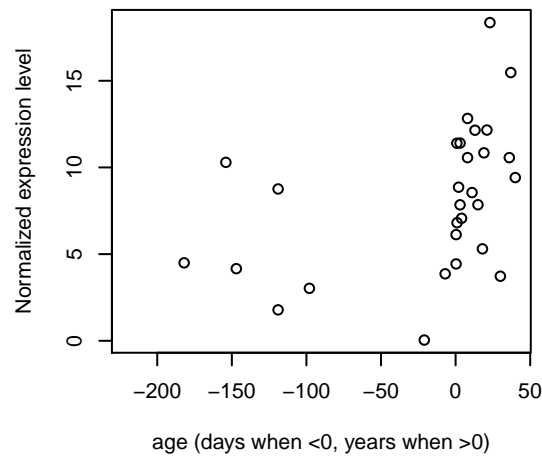

**WVOX\_78143674\_78143732**  
(P=0.0027, Diff = -4.09)  
cerebellar cortex

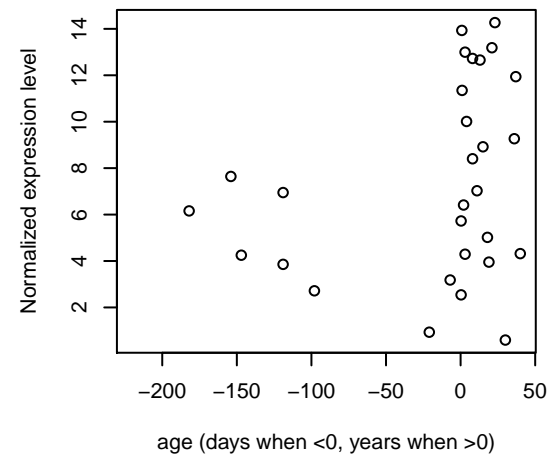

**WVOX\_78148872\_78149051**  
(P=0.0029, Diff = -3.8)  
cerebellar cortex

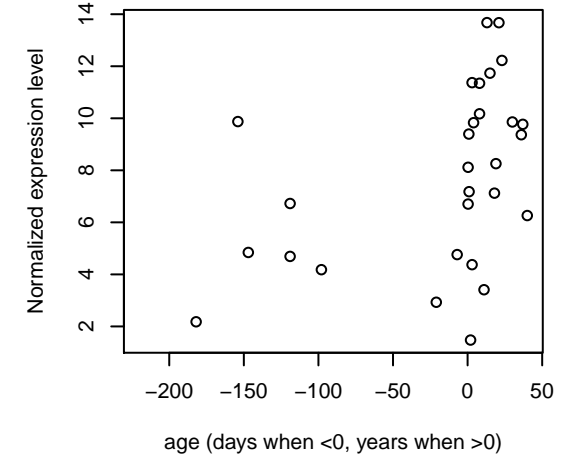

**WVOX\_78198079\_78198186**  
(P=0.0073, Diff = -3.42)  
cerebellar cortex

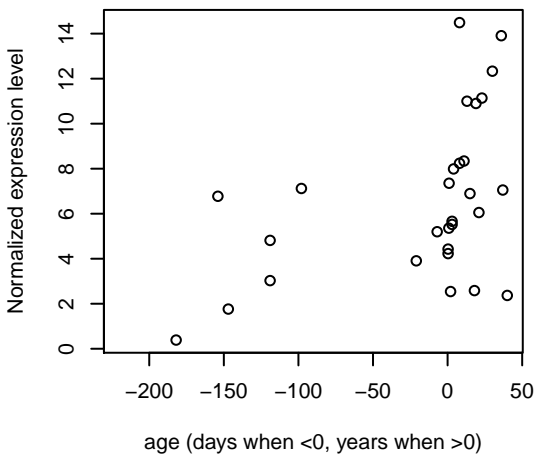

**WVOX\_78312499\_78312593**  
(P=0.3459, Diff = -0.11)  
cerebellar cortex

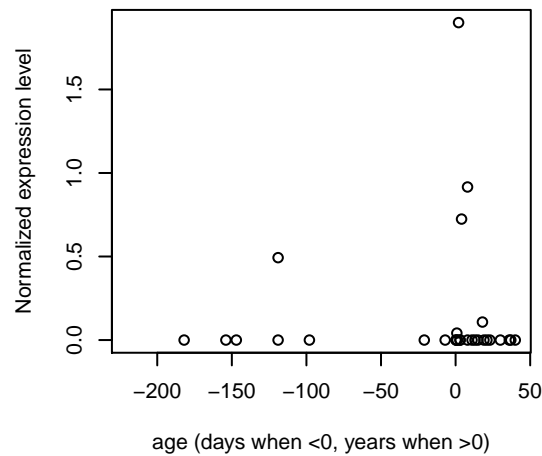

**WVOX\_78420756\_78420845**  
(P=0.0134, Diff = -4.8)  
cerebellar cortex

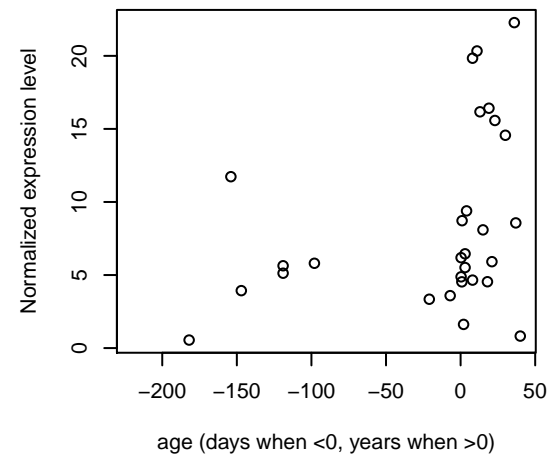

**WVOX\_78458766\_78458952**  
(P=0.001, Diff = -5.82)  
cerebellar cortex

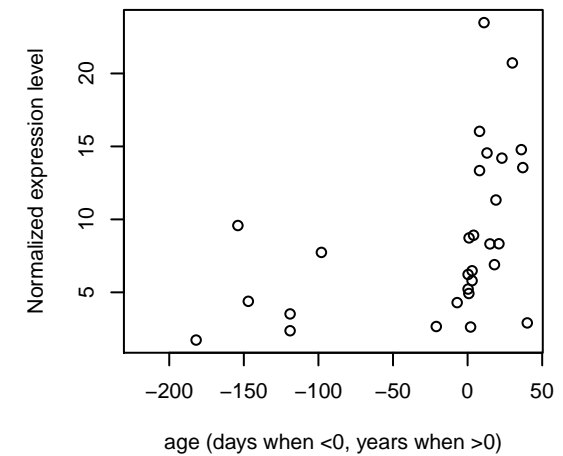

**WVOX\_78466384\_78466649**  
(P=0.0126, Diff = -3.7)  
cerebellar cortex

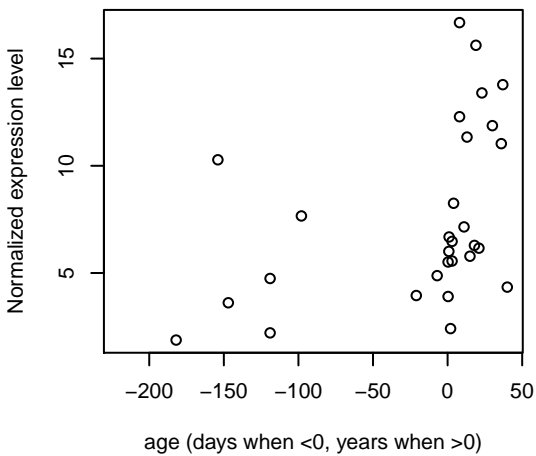

**WVOX\_78790836\_78790912**  
(P=0.7774, Diff = 0.01)  
cerebellar cortex

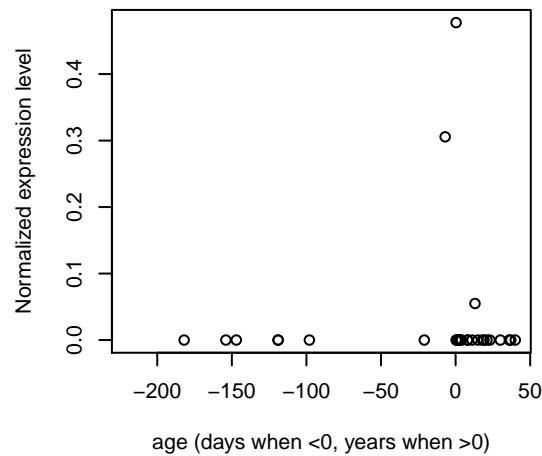

**WVOX\_79245504\_79246031**  
(P=0, Diff = -7.2)  
cerebellar cortex

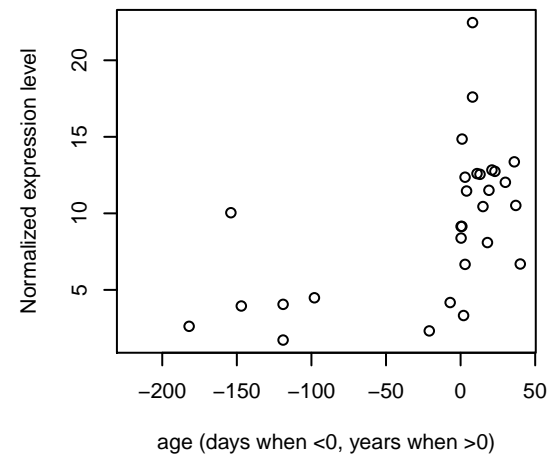

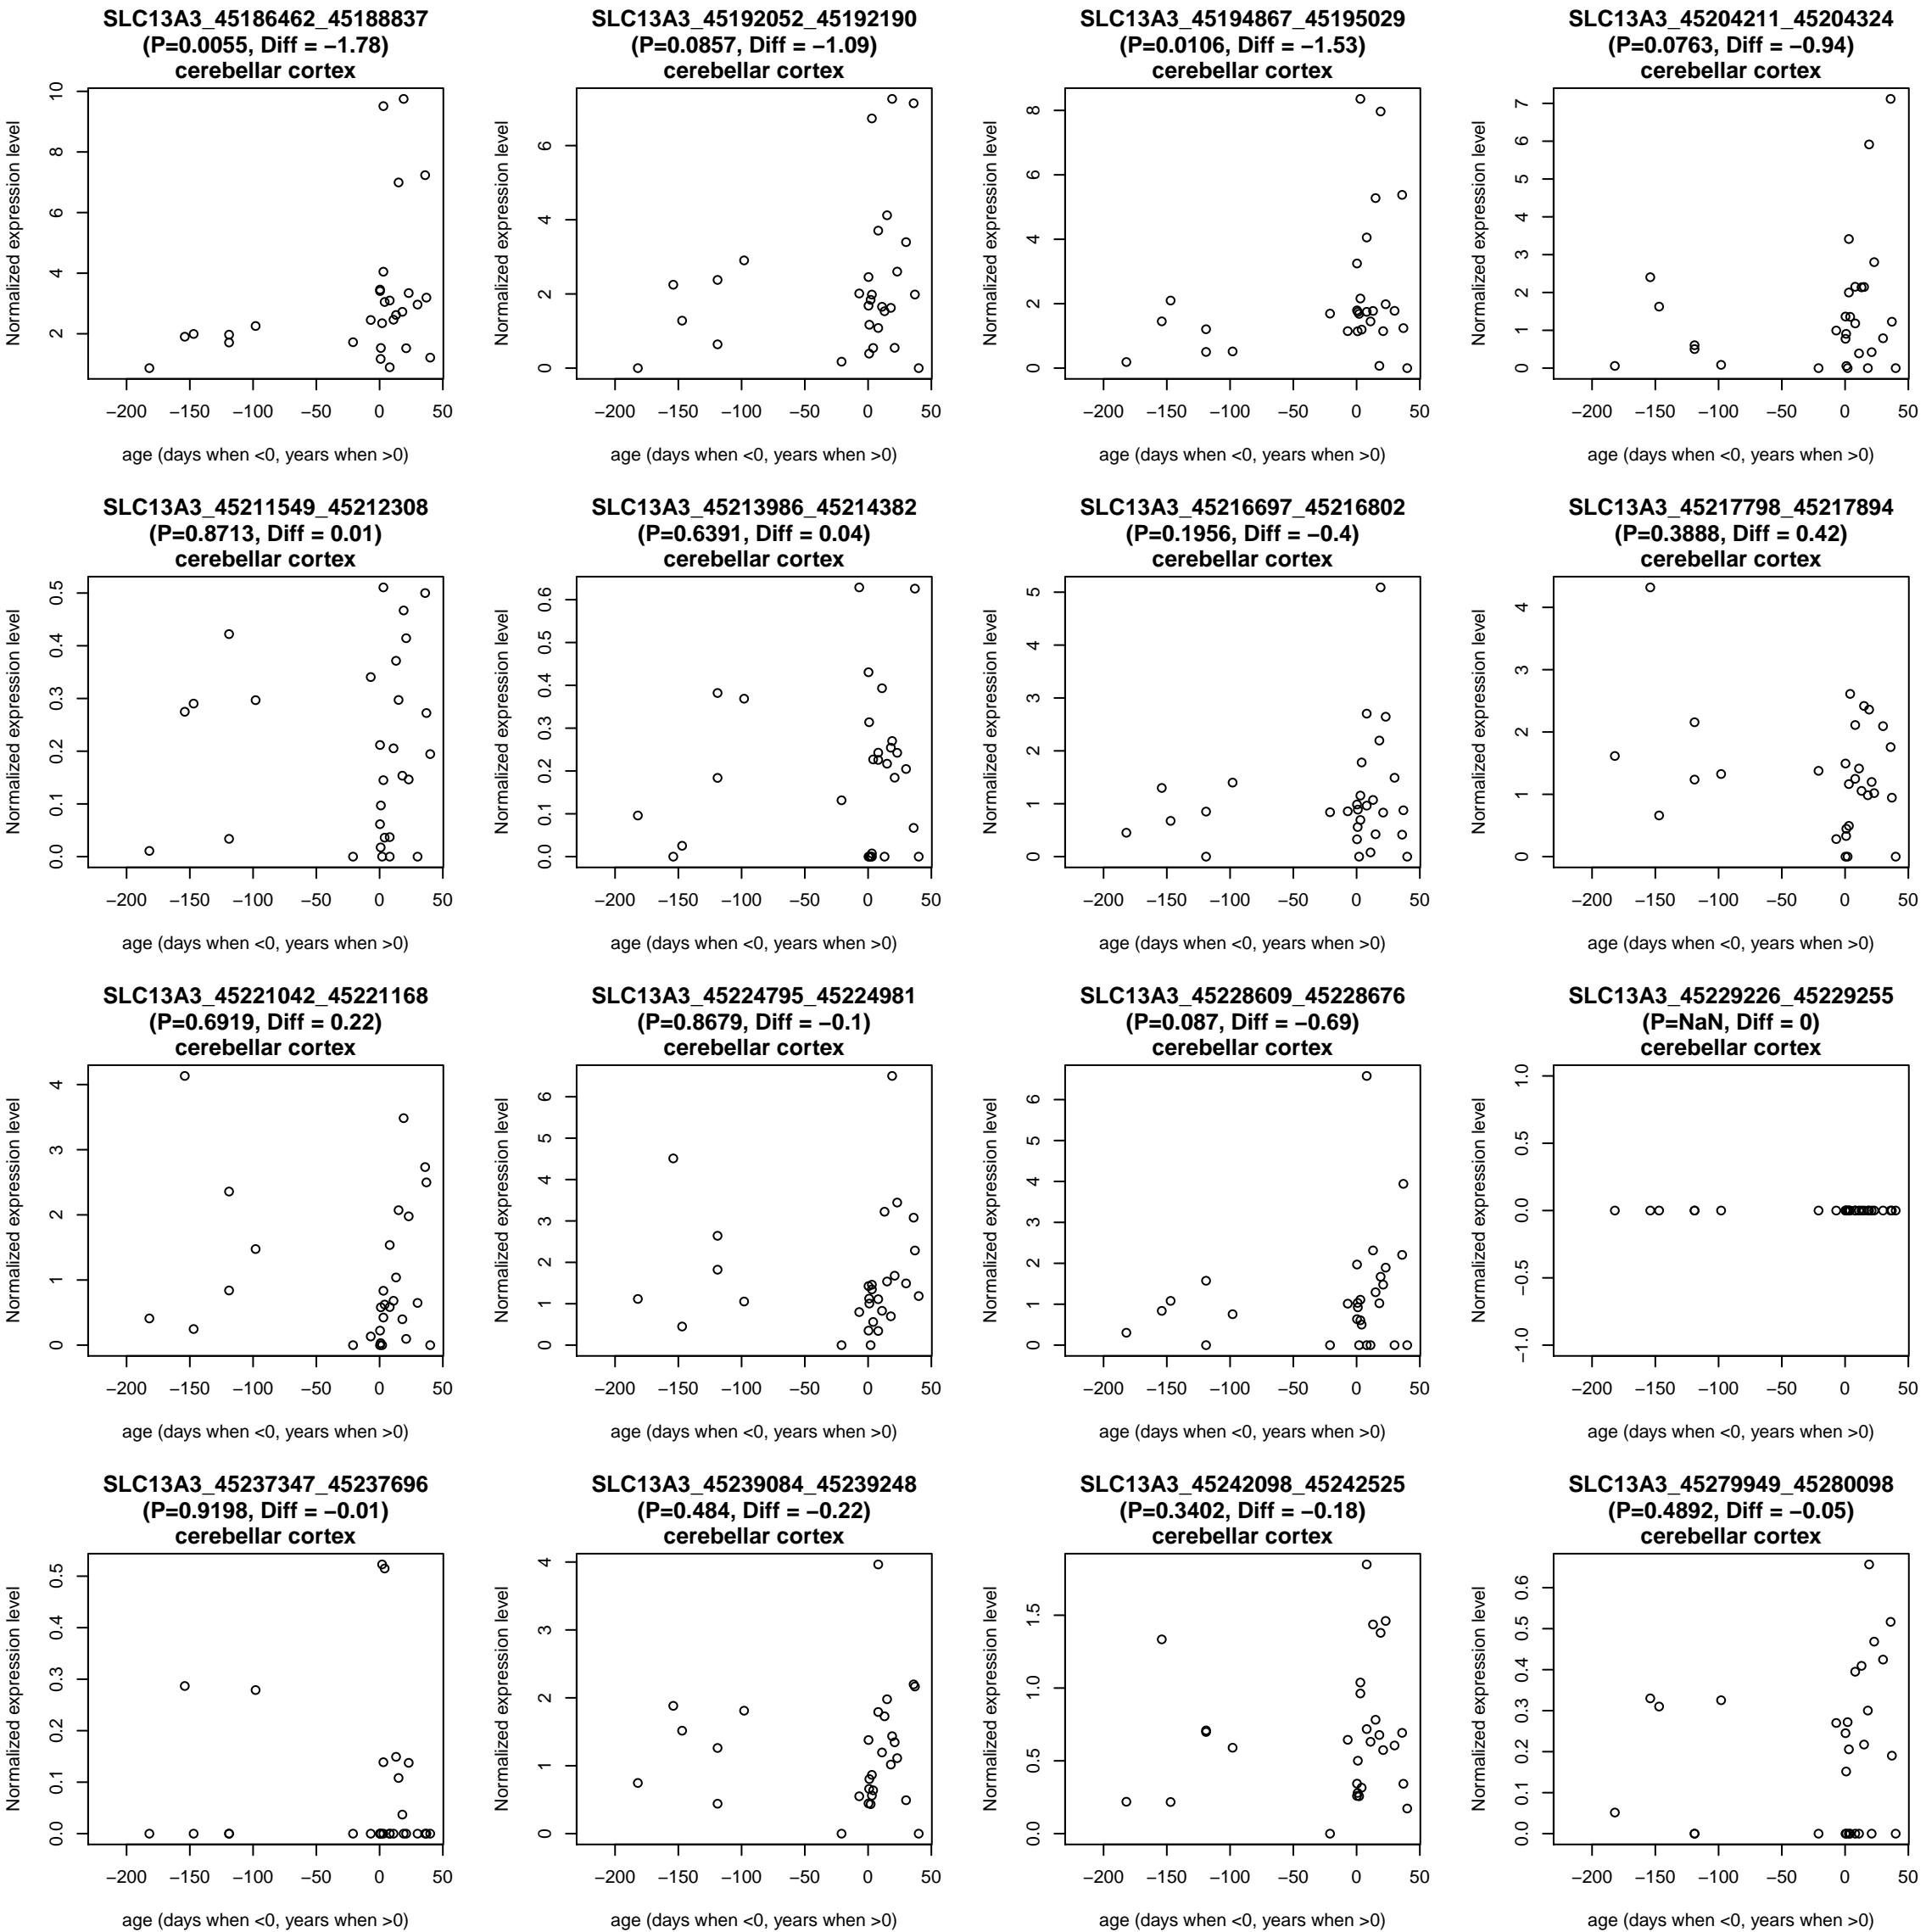

**SLC13A3\_45298681\_45298778**  
(P=0.5833, Diff = 0.11)  
cerebellar cortex

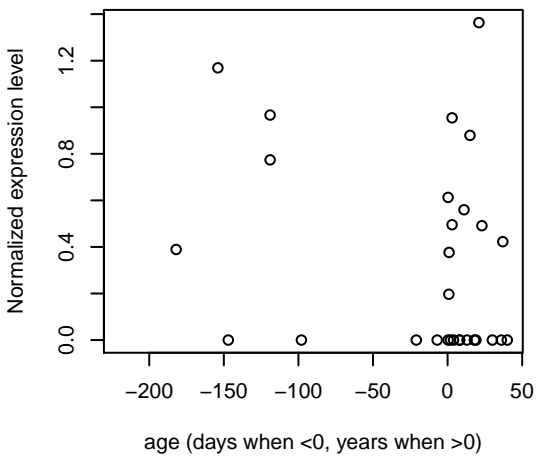

**SLC13A3\_45302302\_45302417**  
(P=0.5584, Diff = -0.03)  
cerebellar cortex

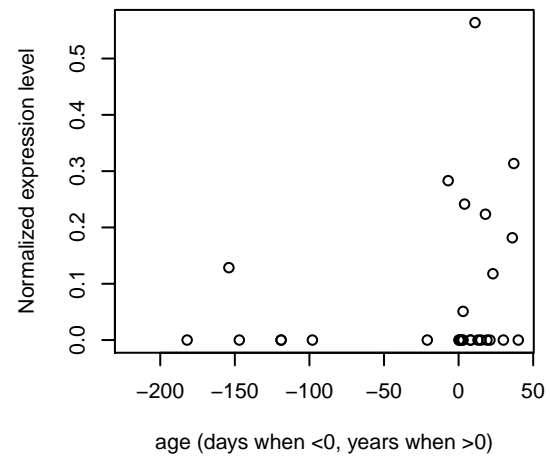

**SLC13A3\_45304585\_45304714**  
(P=0.2467, Diff = -0.15)  
cerebellar cortex

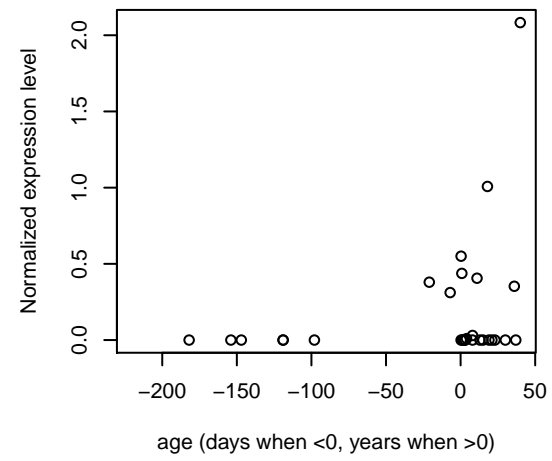

**HTR1B\_78171947\_78173490**  
**(P=0.0847, Diff = 0.29)**  
**cerebellar cortex**

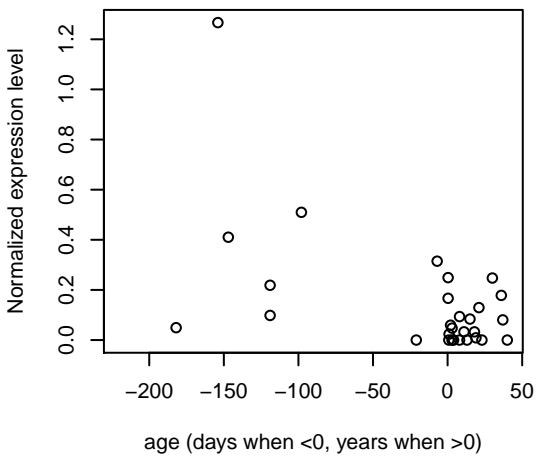

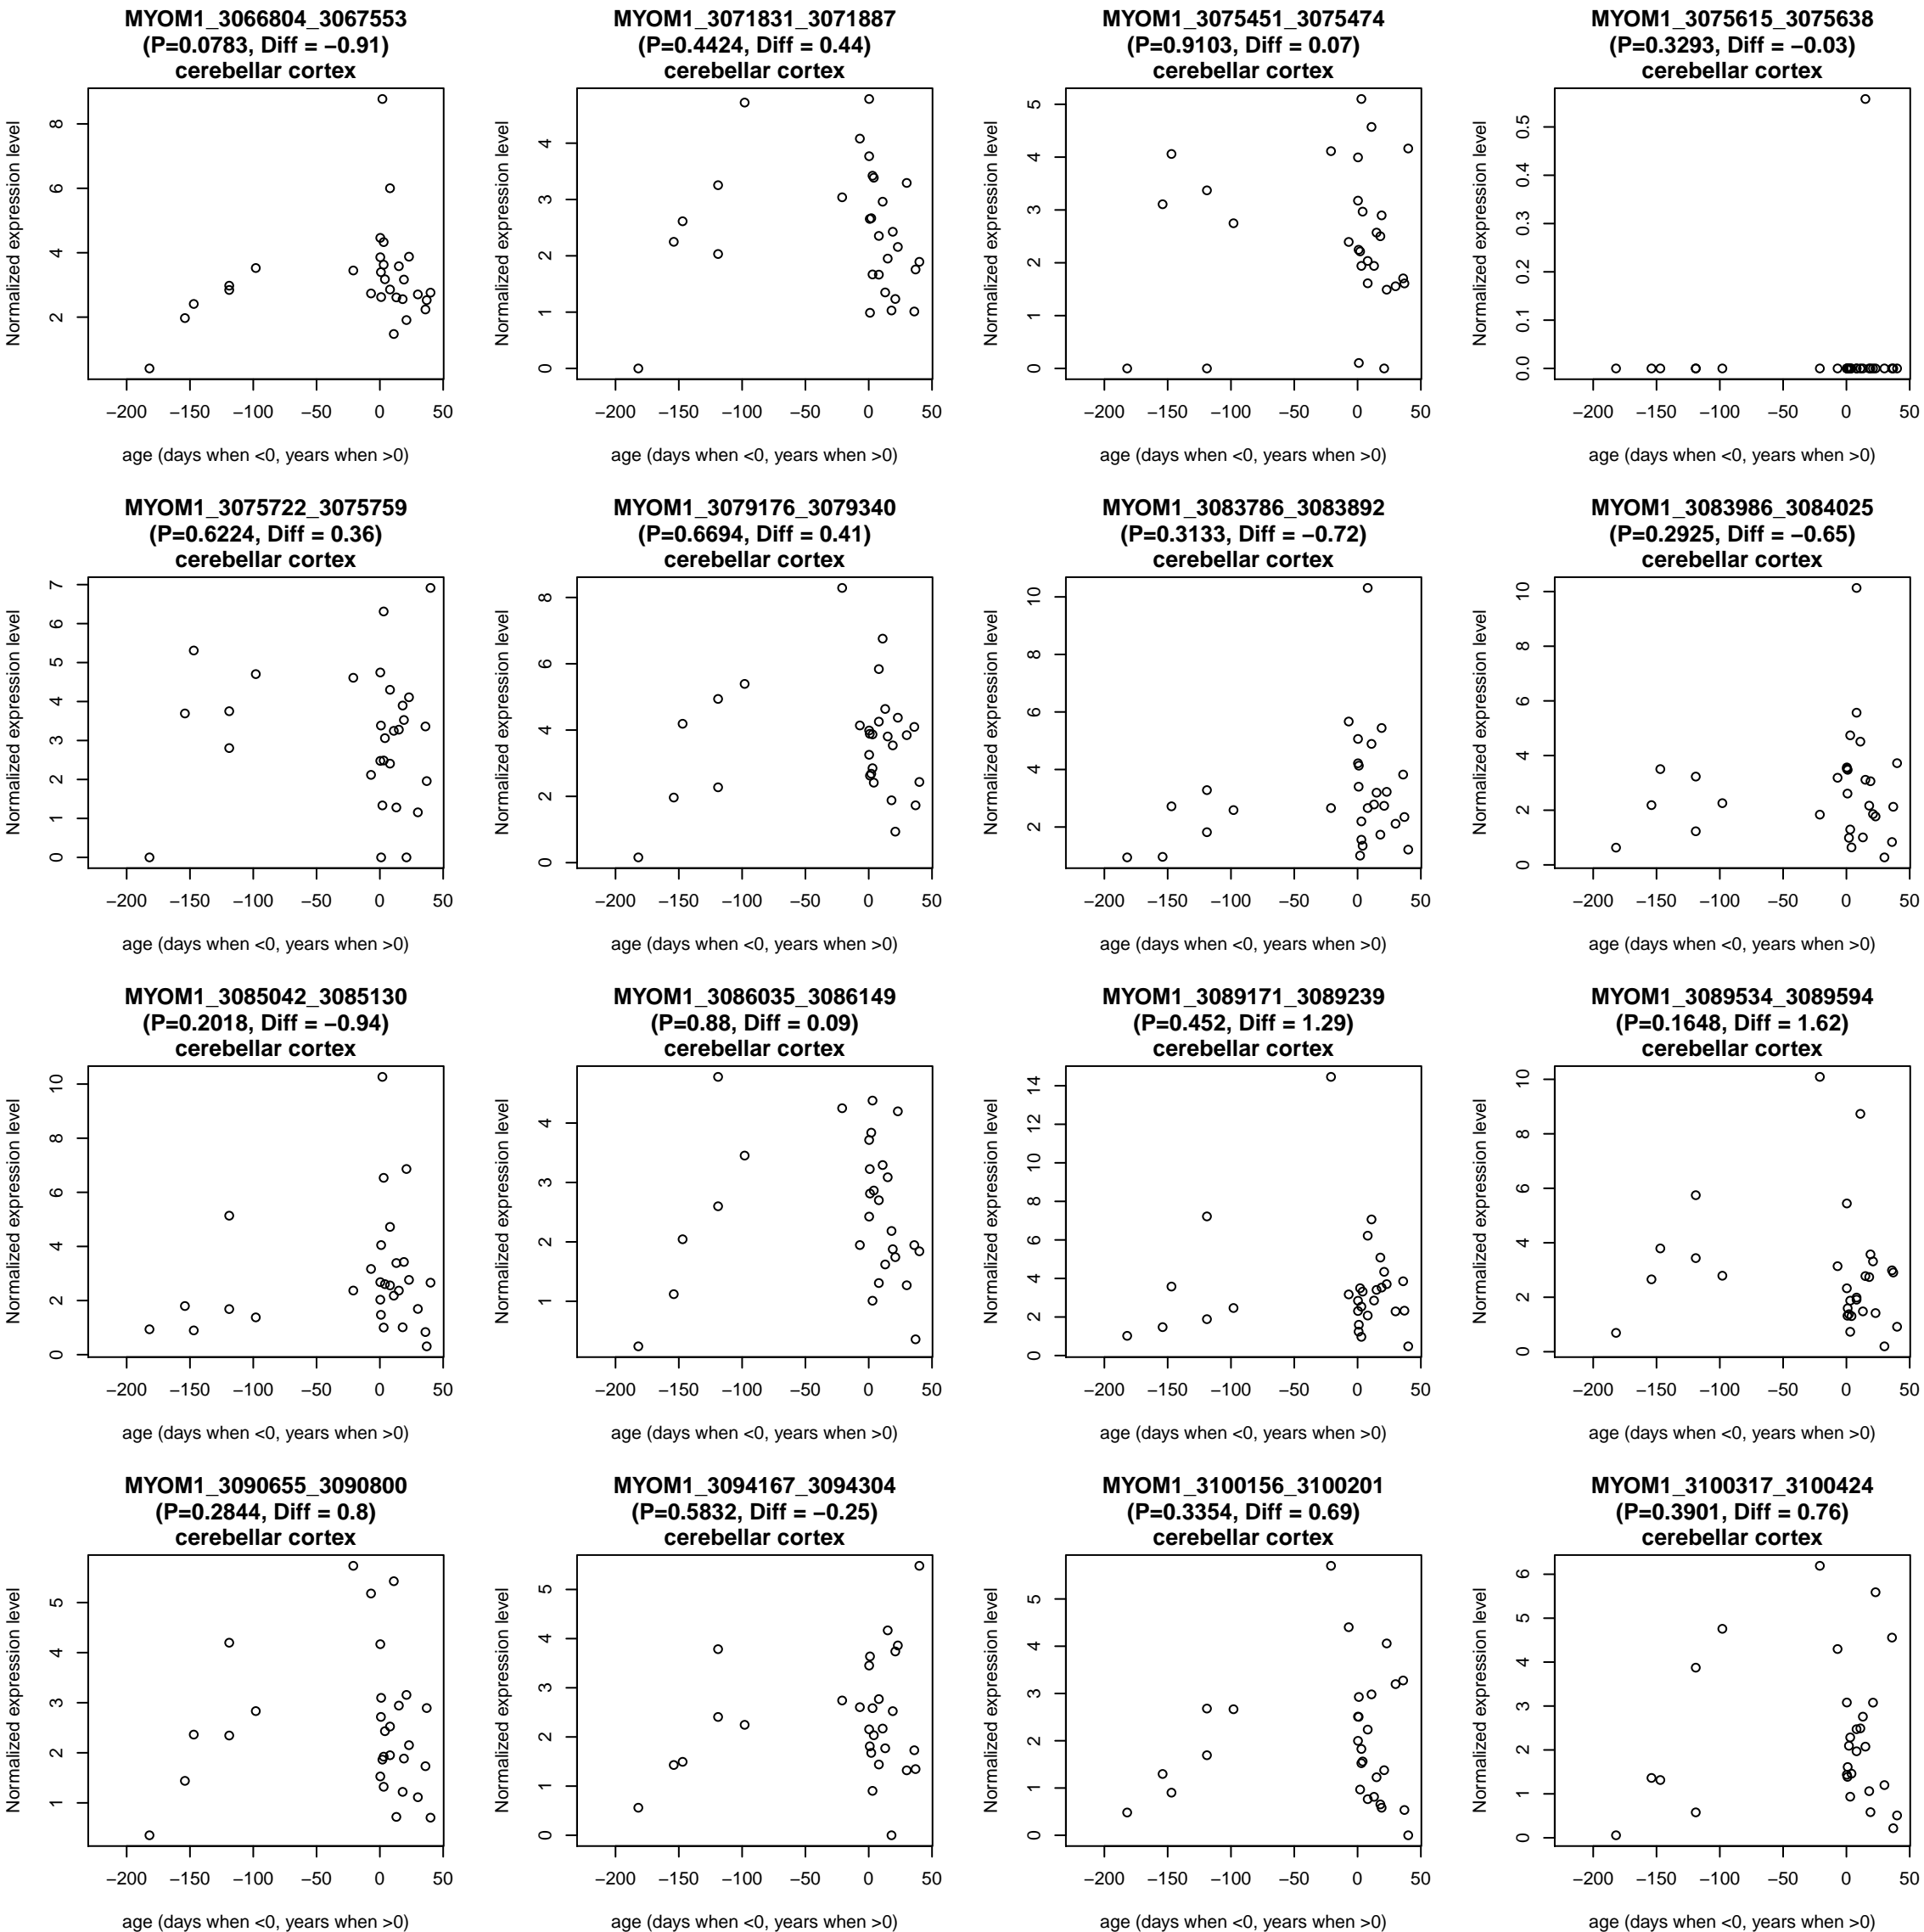

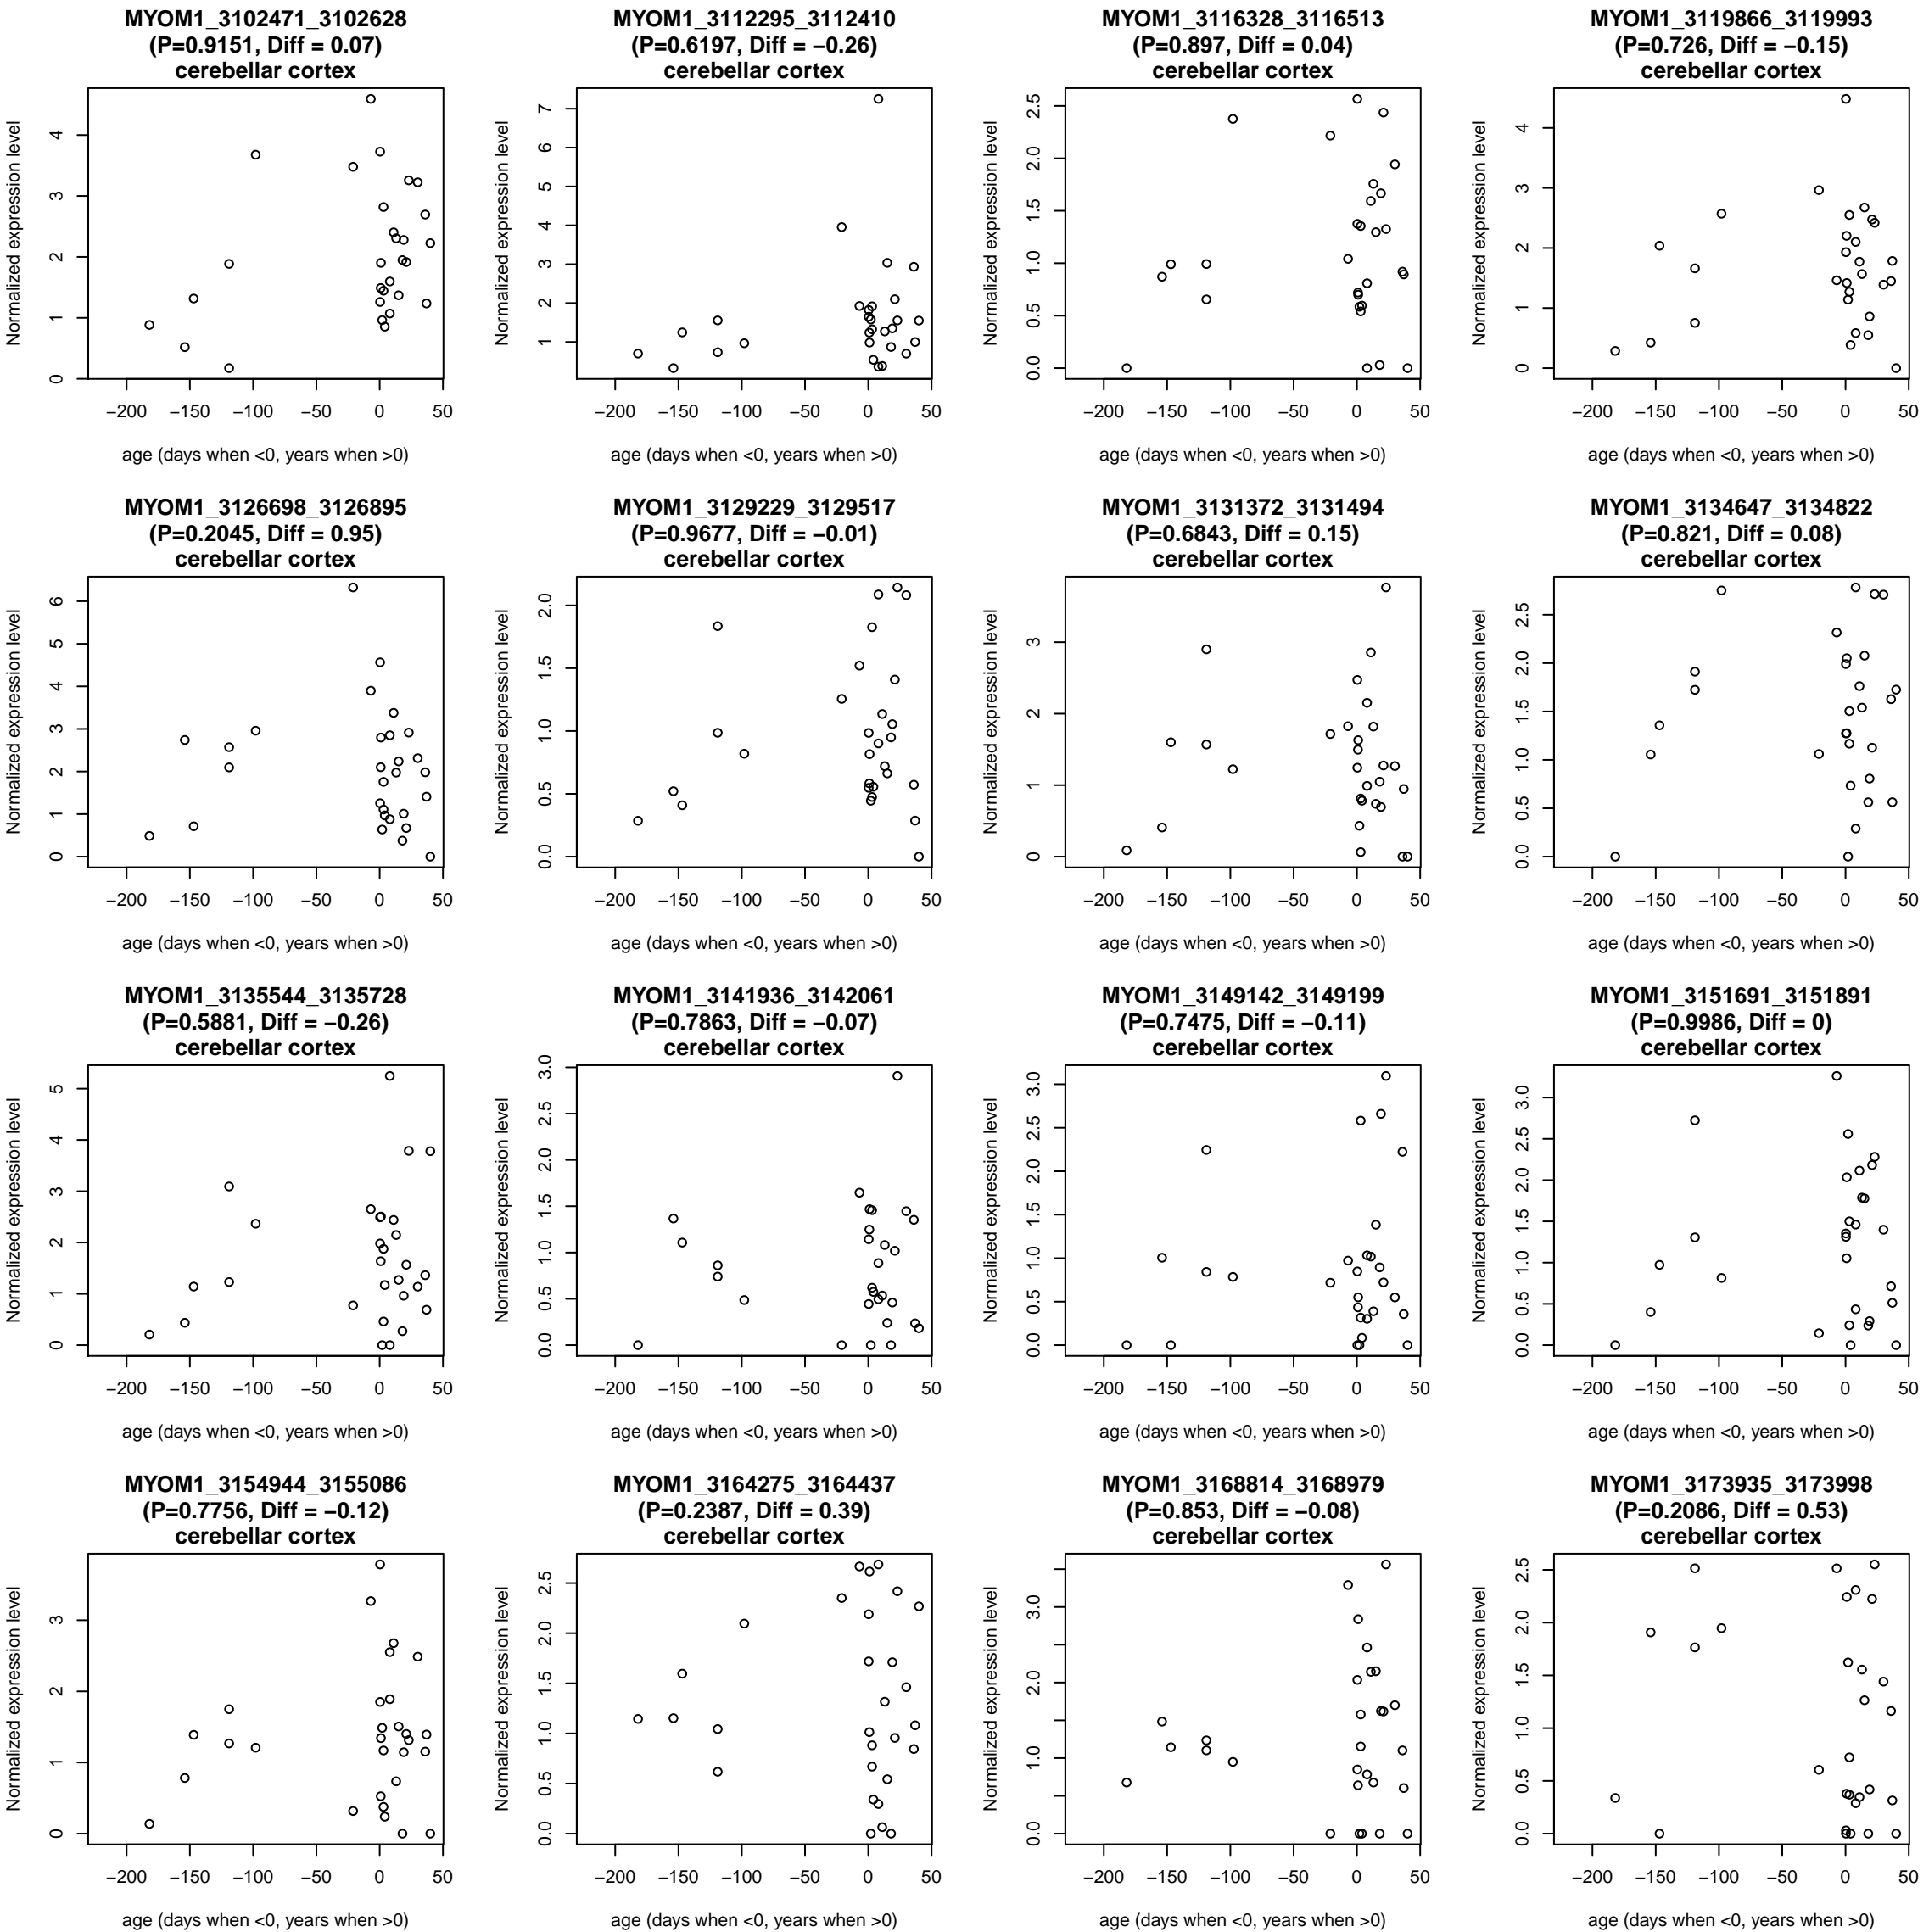

**MYOM1\_3174117\_3174206**  
(P=0.4226, Diff = 0.49)  
cerebellar cortex

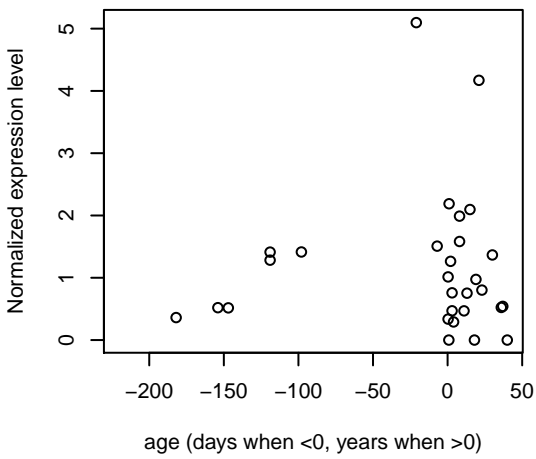

**MYOM1\_3176039\_3176132**  
(P=0.7904, Diff = -0.1)  
cerebellar cortex

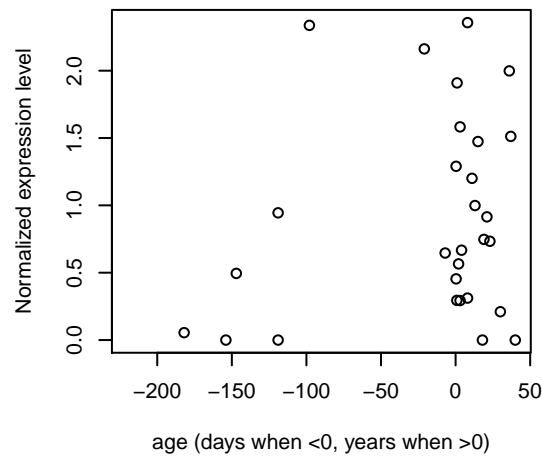

**MYOM1\_3187477\_3187635**  
(P=0.6925, Diff = 0.17)  
cerebellar cortex

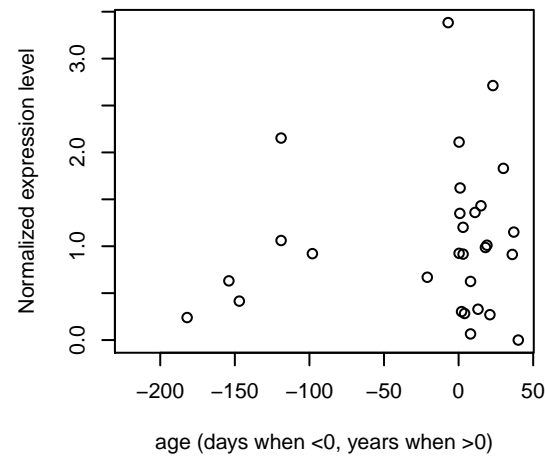

**MYOM1\_3188745\_3189085**  
(P=0.2767, Diff = -0.26)  
cerebellar cortex

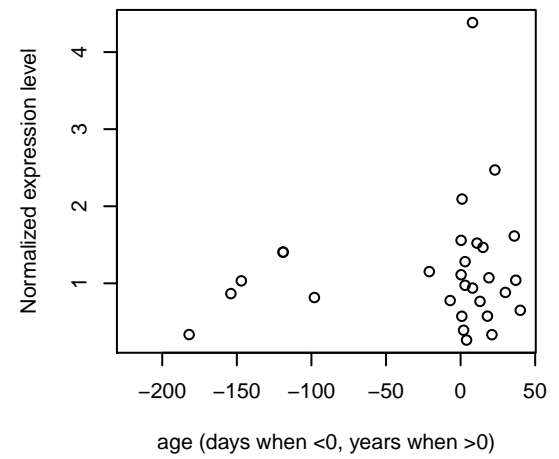

**MYOM1\_3193815\_3193956**  
(P=0.0973, Diff = -0.5)  
cerebellar cortex

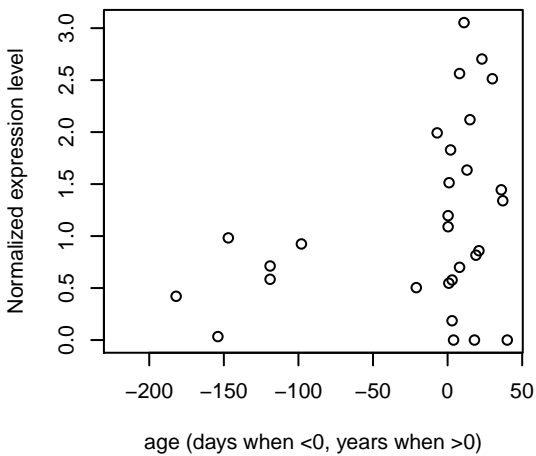

**MYOM1\_3214931\_3215249**  
(P=0.913, Diff = -0.02)  
cerebellar cortex

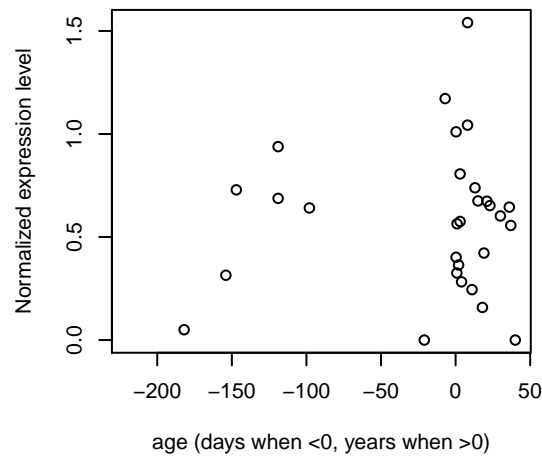

**MYOM1\_3219800\_3220106**  
(P=0.7838, Diff = 0.01)  
cerebellar cortex

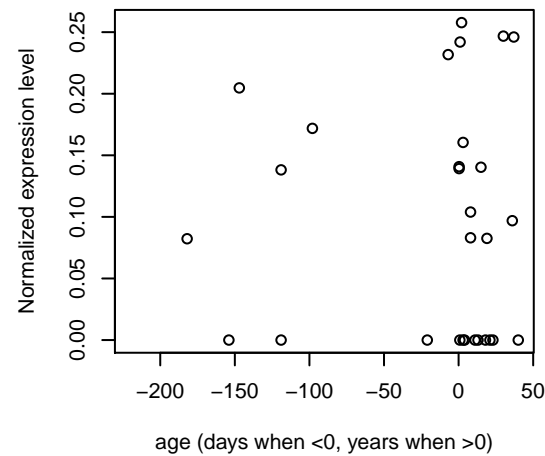

**USP44\_95910335\_95912129**  
(P=0.007, Diff = -0.45)  
cerebellar cortex

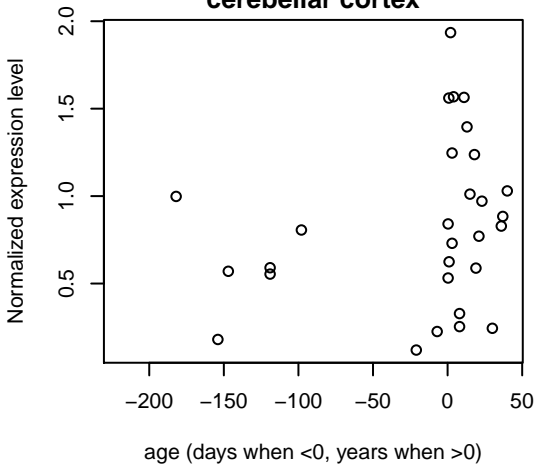

**USP44\_95914772\_95914978**  
(P=0.009, Diff = -0.67)  
cerebellar cortex

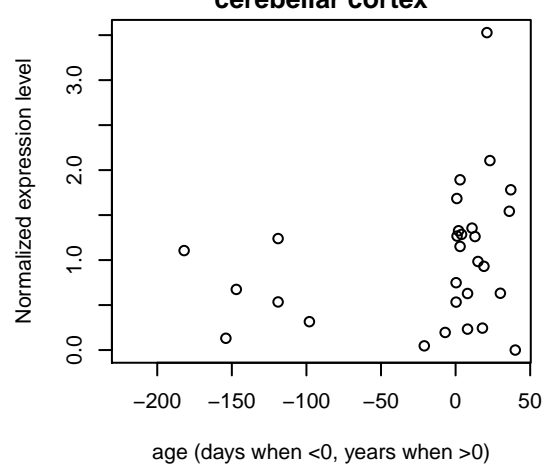

**USP44\_95918295\_95918564**  
(P=0.6491, Diff = 0.08)  
cerebellar cortex

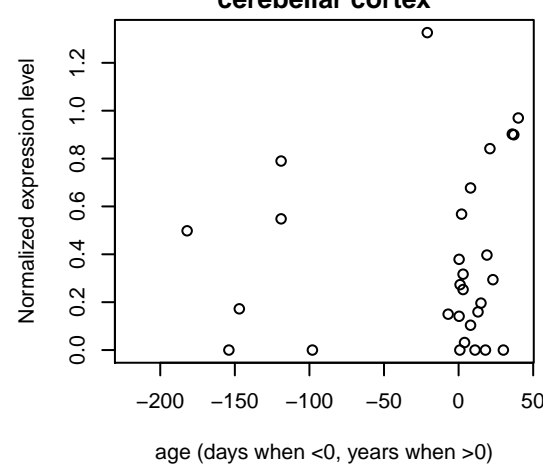

**USP44\_95922582\_95922778**  
(P=0.0336, Diff = -0.41)  
cerebellar cortex

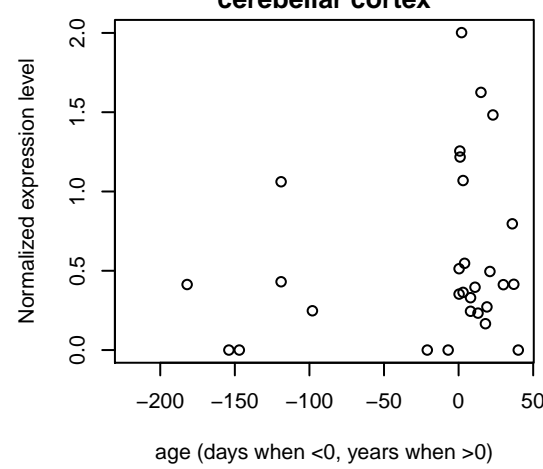

**USP44\_95926604\_95928102**  
(P=0, Diff = -0.79)  
cerebellar cortex

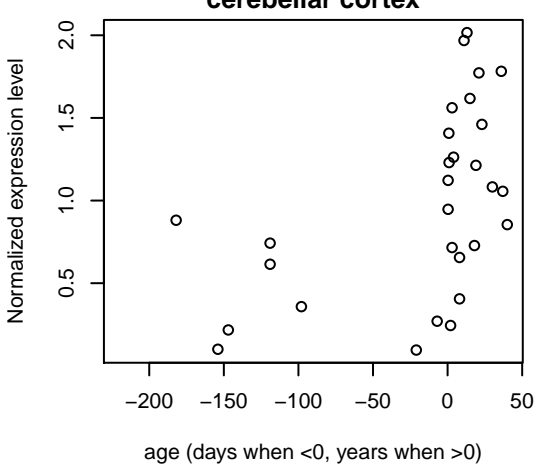

**USP44\_95929148\_95929202**  
(P=0.017, Diff = -0.14)  
cerebellar cortex

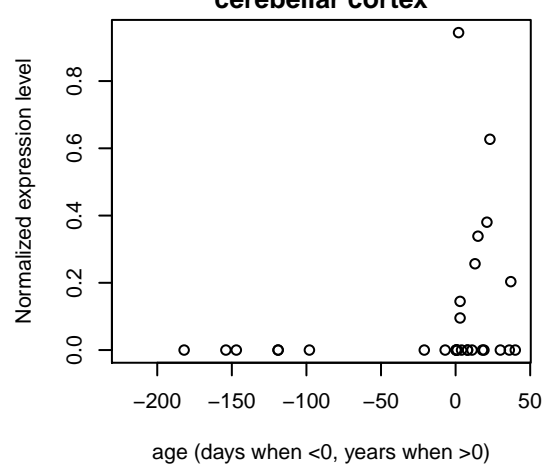

**USP44\_95940225\_95940766**  
(P=7e-04, Diff = -0.56)  
cerebellar cortex

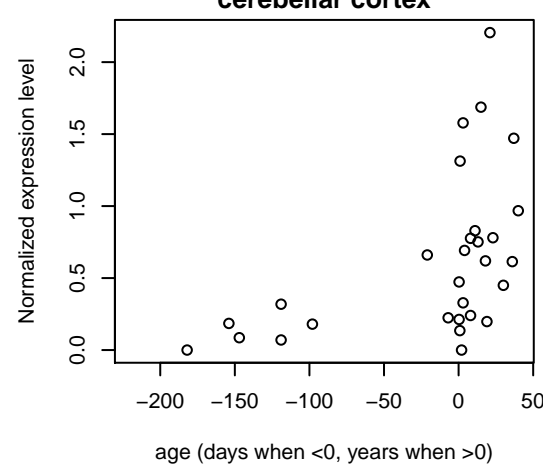

**USP44\_95941758\_95942048**  
(P=0.0395, Diff = -0.21)  
cerebellar cortex

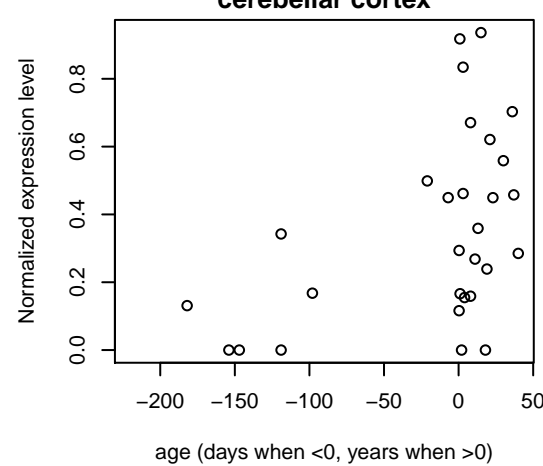

**USP44\_95942301\_95942620**  
(P=0.0824, Diff = -0.2)  
cerebellar cortex

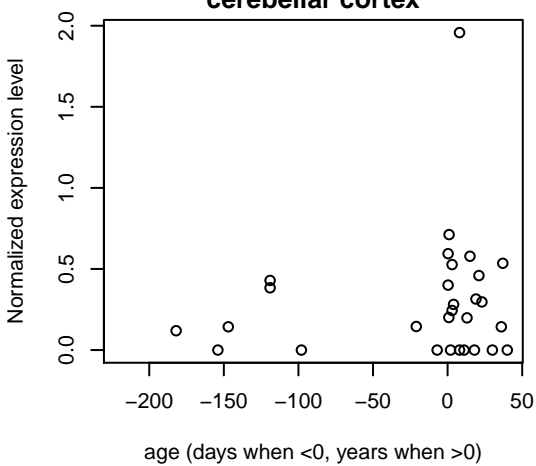

**USP44\_95945047\_95945266**  
(P=0.3506, Diff = 0.08)  
cerebellar cortex

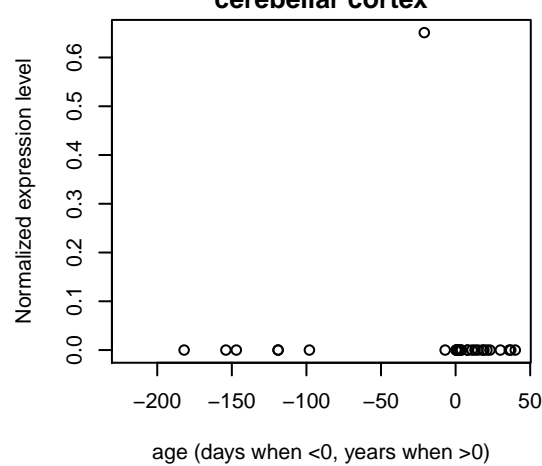



**IGFBP7\_57896938\_57897502**  
(P=0.313, Diff = 29.44)  
cerebellar cortex

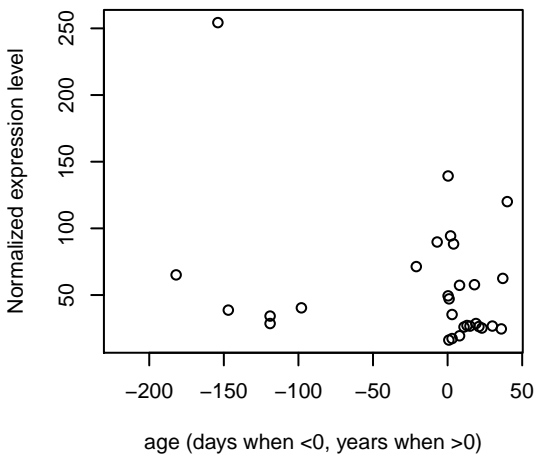

**IGFBP7\_57898203\_57898718**  
(P=0.3931, Diff = 36.41)  
cerebellar cortex

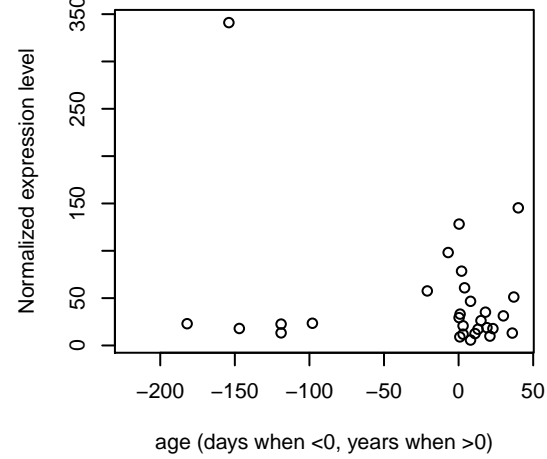

**IGFBP7\_57899360\_57899477**  
(P=0.346, Diff = 211.91)  
cerebellar cortex

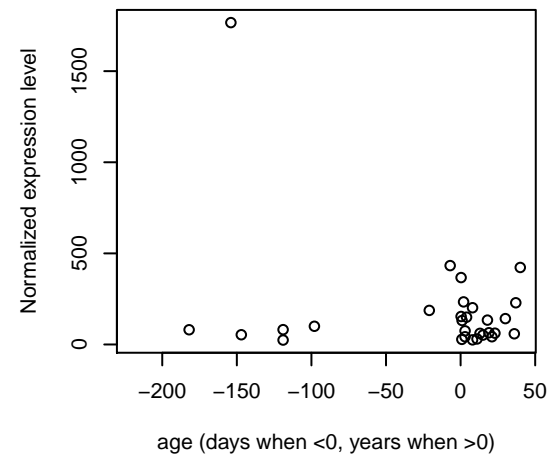

**IGFBP7\_57906989\_57907099**  
(P=0.3502, Diff = 239.12)  
cerebellar cortex

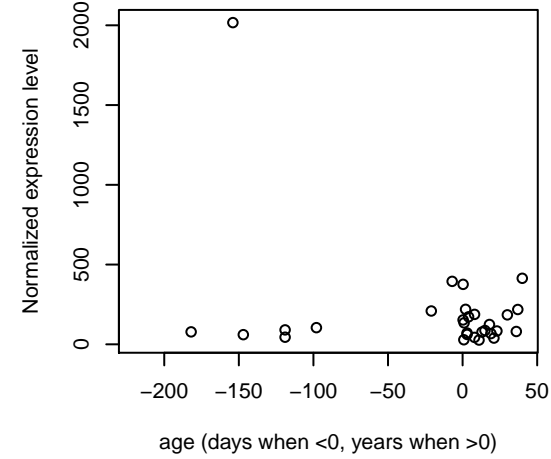

**IGFBP7\_57976042\_57976551**  
(P=0.3492, Diff = 71.28)  
cerebellar cortex

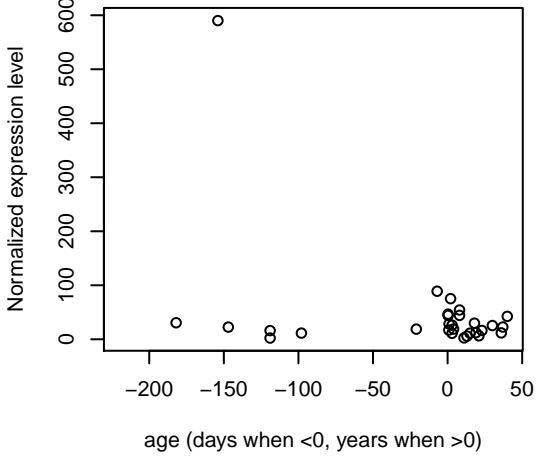

**OPA1\_193310932\_193311198**  
(P=0.3837, Diff = 0.7)  
cerebellar cortex

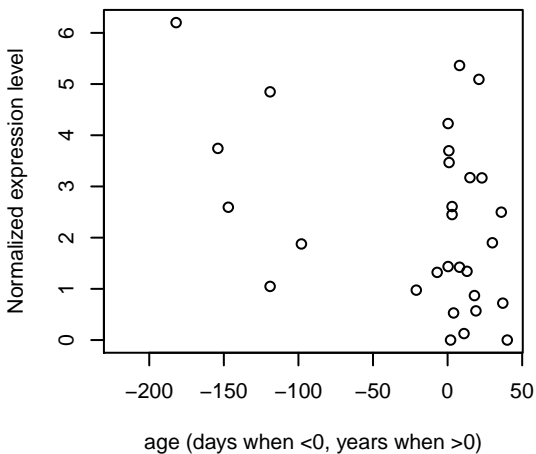

**OPA1\_193321288\_193321346**  
(P=0.8101, Diff = 0.01)  
cerebellar cortex

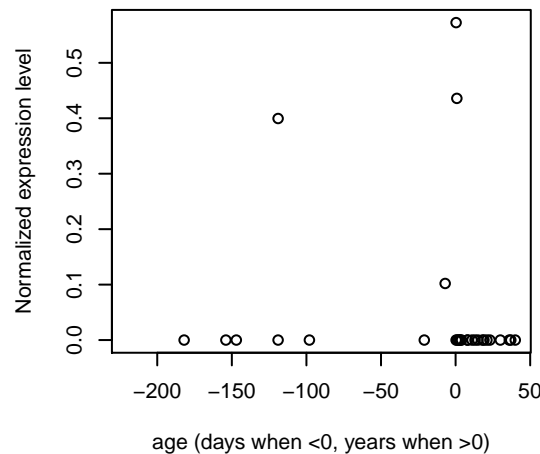

**OPA1\_193332511\_193332830**  
(P=0.5828, Diff = -1.02)  
cerebellar cortex

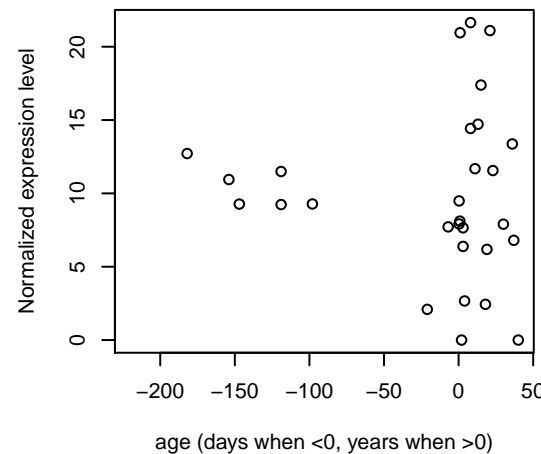

**OPA1\_193333462\_193333559**  
(P=0.6308, Diff = -1.23)  
cerebellar cortex

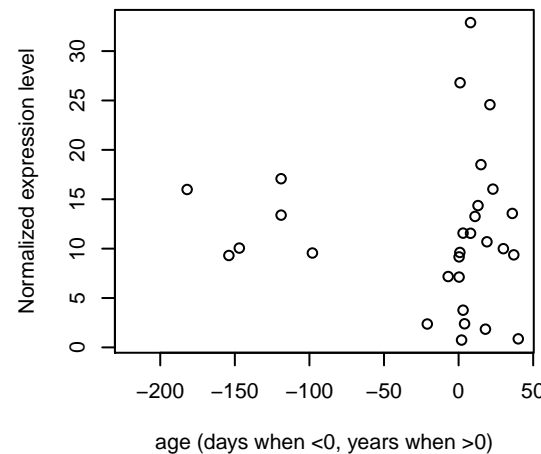

**OPA1\_193334966\_193335074**  
(P=0.9241, Diff = -0.19)  
cerebellar cortex

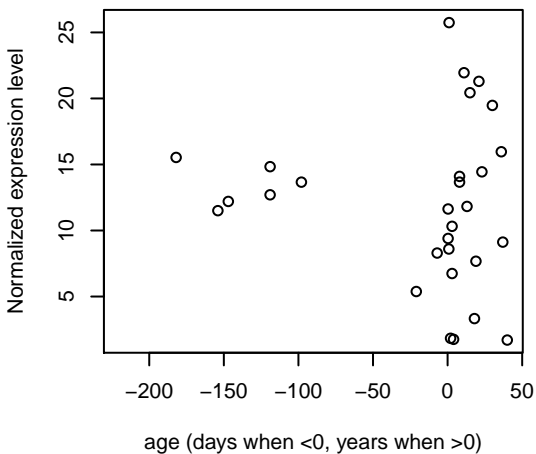

**OPA1\_193335572\_193335626**  
(P=0.9164, Diff = -0.04)  
cerebellar cortex

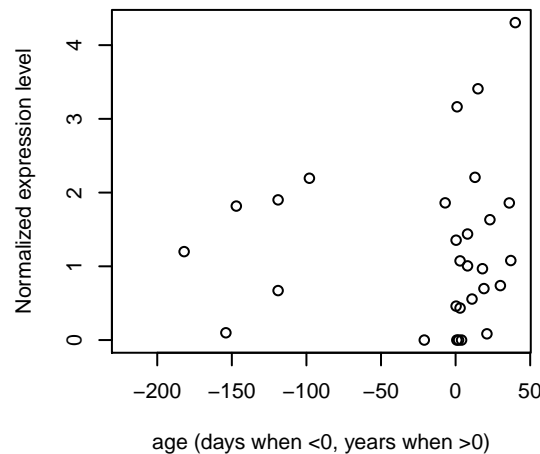

**OPA1\_193336615\_193336726**  
(P=0.3953, Diff = -1.22)  
cerebellar cortex

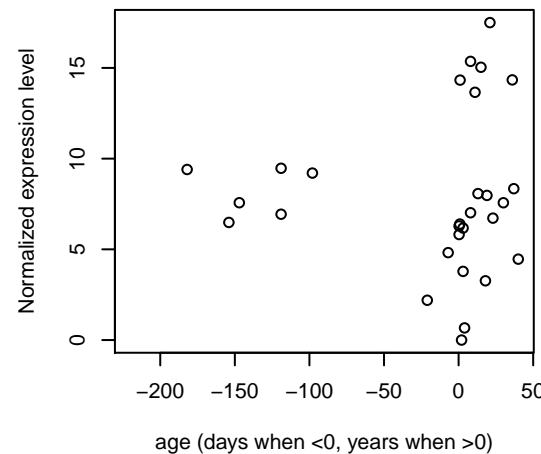

**OPA1\_193343846\_193343991**  
(P=0.8886, Diff = 0.11)  
cerebellar cortex

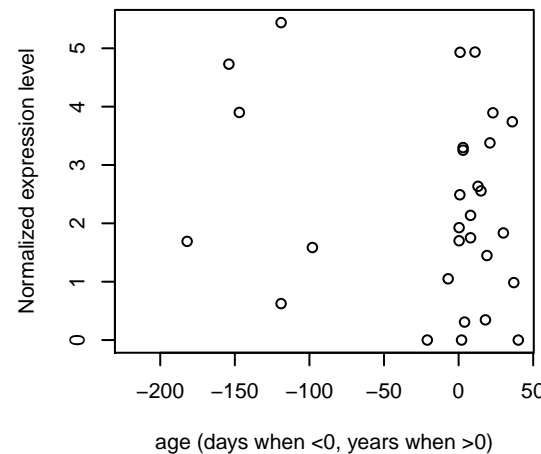

**OPA1\_193346297\_193346333**  
(P=0.1454, Diff = 0.25)  
cerebellar cortex

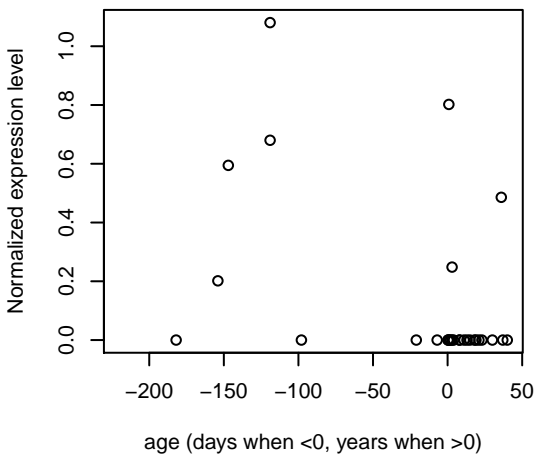

**OPA1\_193349400\_193349454**  
(P=0.5548, Diff = 1.91)  
cerebellar cortex

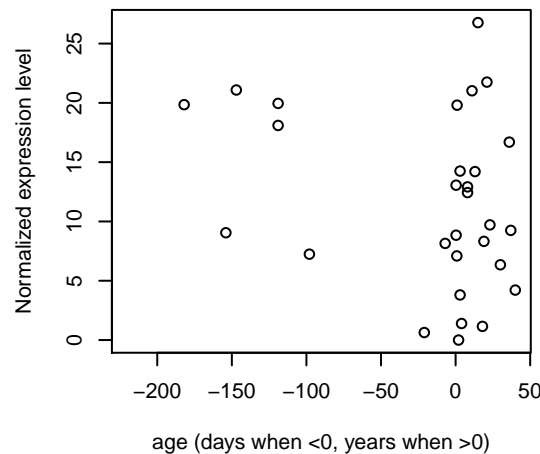

**OPA1\_193353206\_193353311**  
(P=0.8352, Diff = -0.54)  
cerebellar cortex

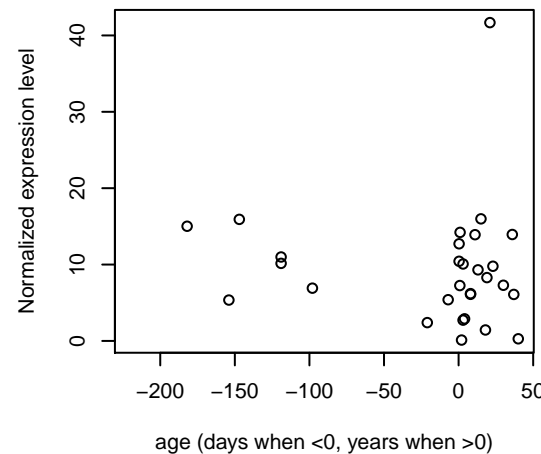

**OPA1\_193354983\_193355070**  
(P=0.6644, Diff = -1.26)  
cerebellar cortex

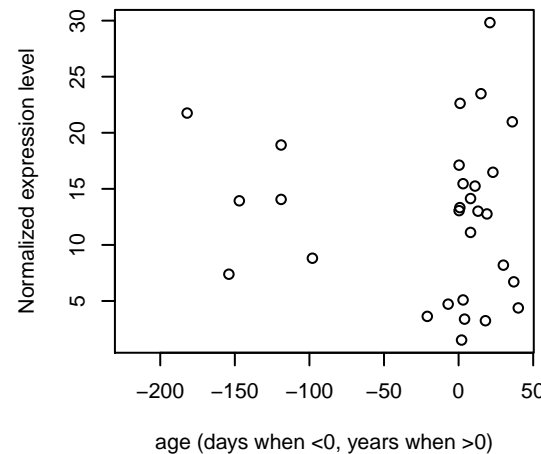

**OPA1\_193355740\_193355854**  
(P=0.9041, Diff = 0.37)  
cerebellar cortex

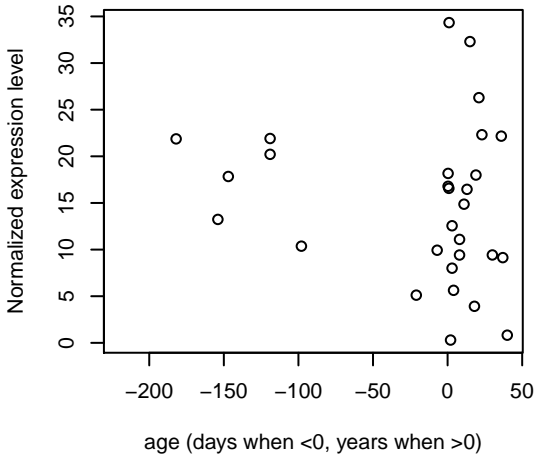

**OPA1\_193360553\_193360634**  
(P=0.4707, Diff = 1.97)  
cerebellar cortex

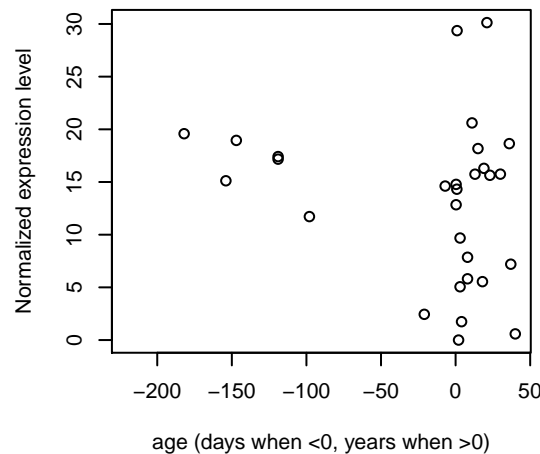

**OPA1\_193360763\_193360838**  
(P=0.6914, Diff = -0.89)  
cerebellar cortex

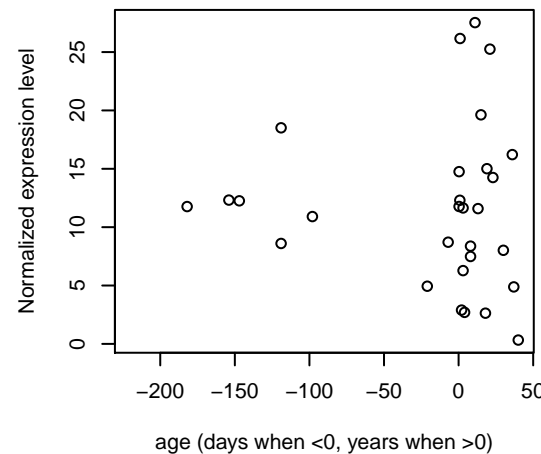

**OPA1\_193361161\_193361233**  
(P=0.9728, Diff = -0.09)  
cerebellar cortex

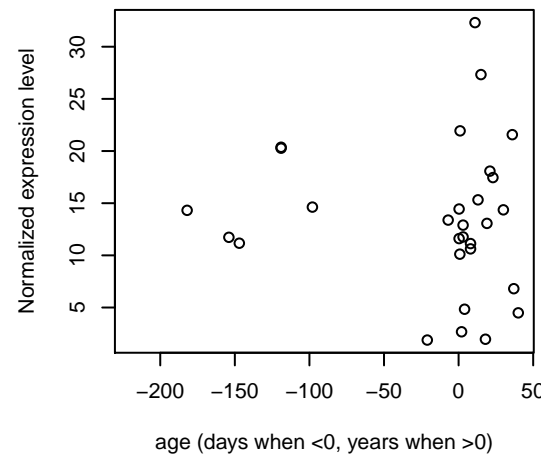

**OPA1\_193361316\_193361416**  
**(P=0.9975, Diff = -0.01)**  
**cerebellar cortex**

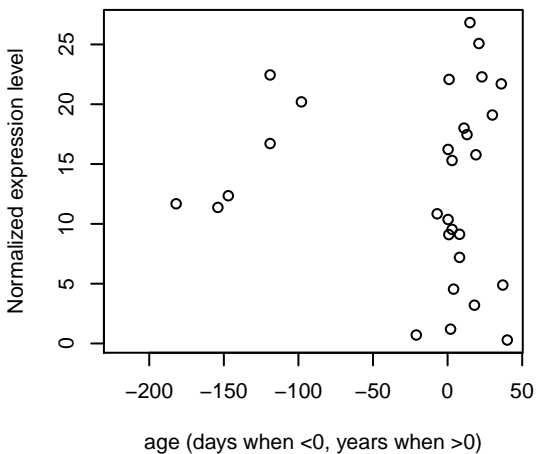

**OPA1\_193361763\_193361940**  
**(P=0.5777, Diff = 1.3)**  
**cerebellar cortex**

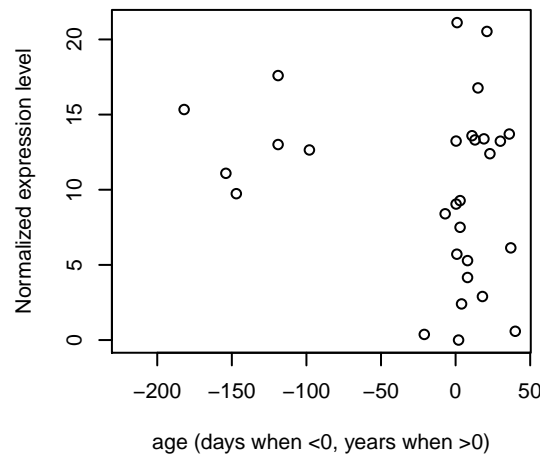

**OPA1\_193363341\_193363414**  
**(P=0.3794, Diff = 2.27)**  
**cerebellar cortex**

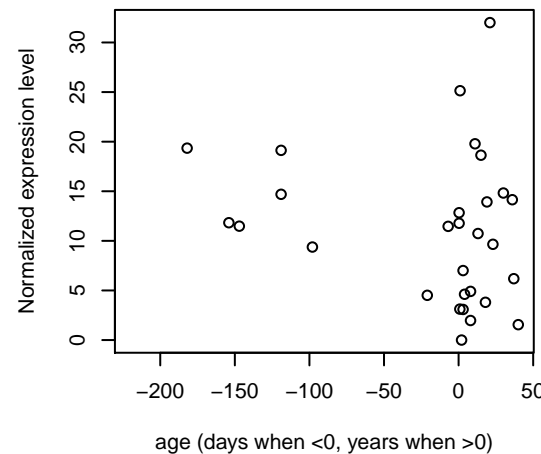

**OPA1\_193363516\_193363589**  
**(P=0.747, Diff = 0.93)**  
**cerebellar cortex**

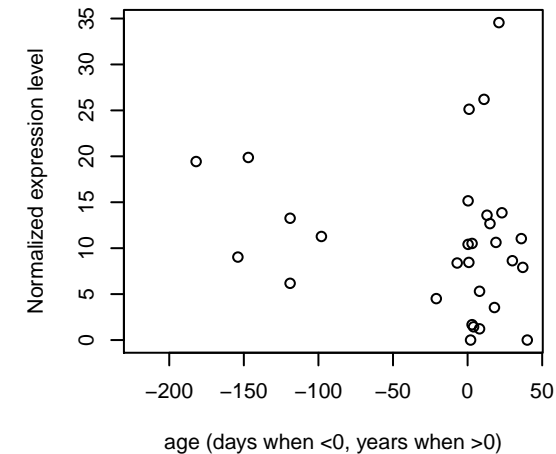

**OPA1\_193364853\_193364969**  
**(P=0.4585, Diff = -1.94)**  
**cerebellar cortex**

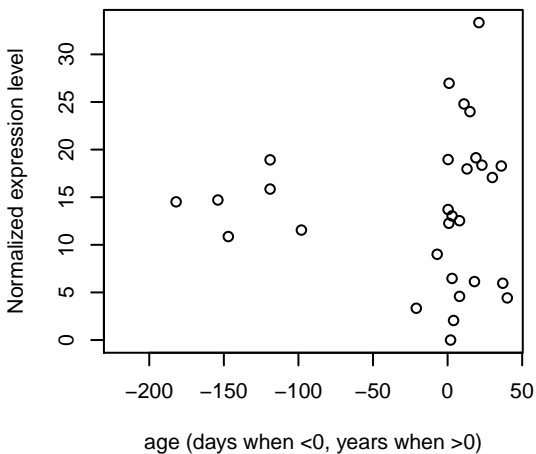

**OPA1\_193365858\_193366249**  
**(P=0.6925, Diff = 0.15)**  
**cerebellar cortex**

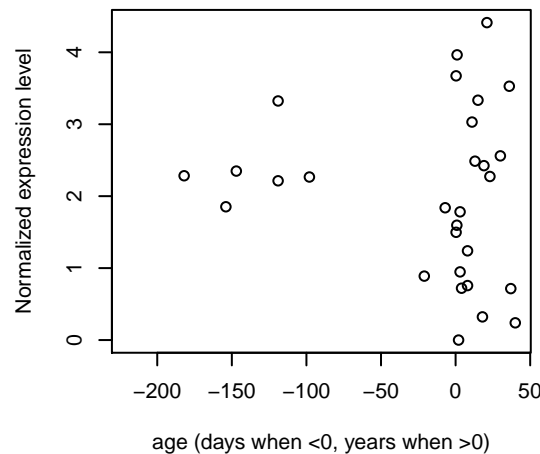

**OPA1\_193366554\_193366660**  
**(P=0.6652, Diff = 0.88)**  
**cerebellar cortex**

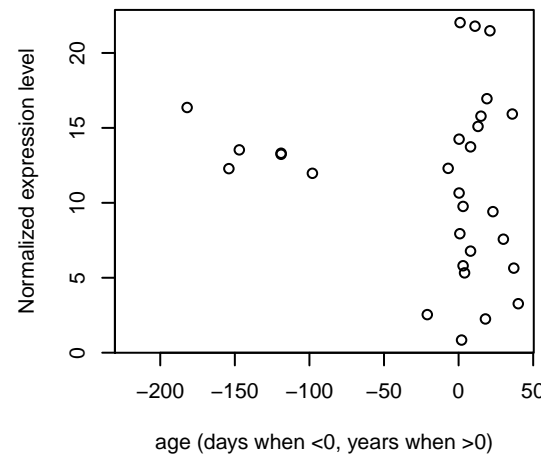

**OPA1\_193372650\_193372816**  
**(P=0.4661, Diff = 2.2)**  
**cerebellar cortex**

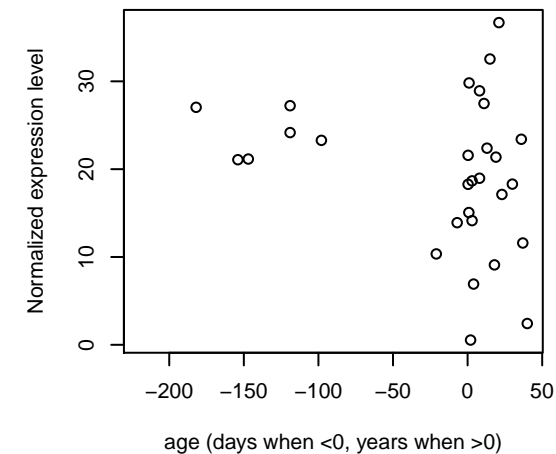

**OPA1\_193374868\_193375021**  
**(P=0.6345, Diff = 1.65)**  
**cerebellar cortex**

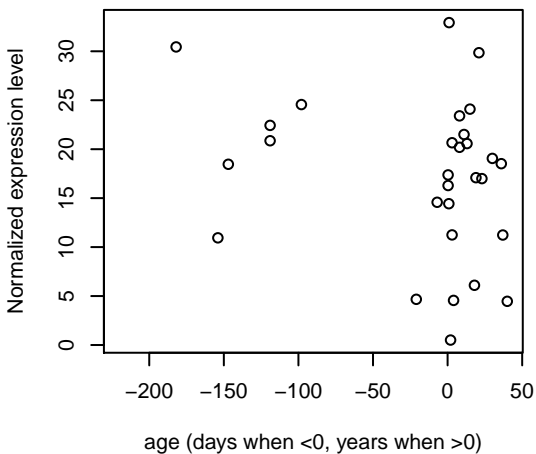

**OPA1\_193376675\_193376784**  
**(P=0.4549, Diff = 2.85)**  
**cerebellar cortex**

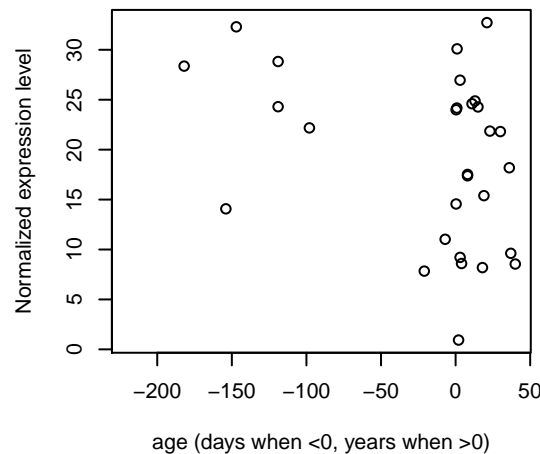

**OPA1\_193377270\_193377350**  
**(P=0.9313, Diff = 0.35)**  
**cerebellar cortex**

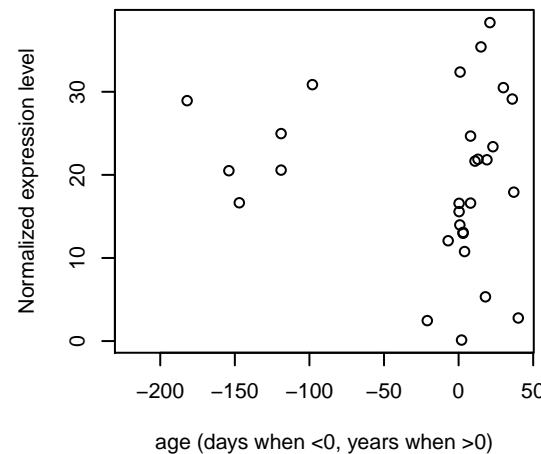

**OPA1\_193380610\_193380751**  
**(P=0.7851, Diff = 1.36)**  
**cerebellar cortex**

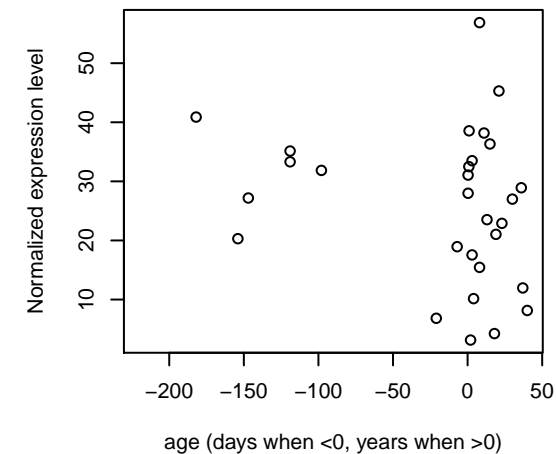

**OPA1\_193382668\_193382785**  
**(P=0.6344, Diff = 1.46)**  
**cerebellar cortex**

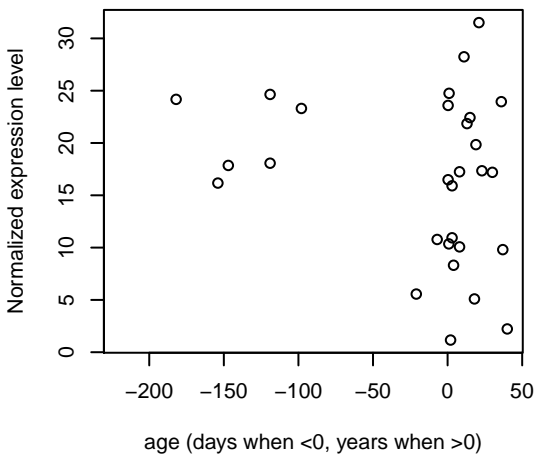

**OPA1\_193384084\_193384178**  
**(P=0.8001, Diff = 1.11)**  
**cerebellar cortex**

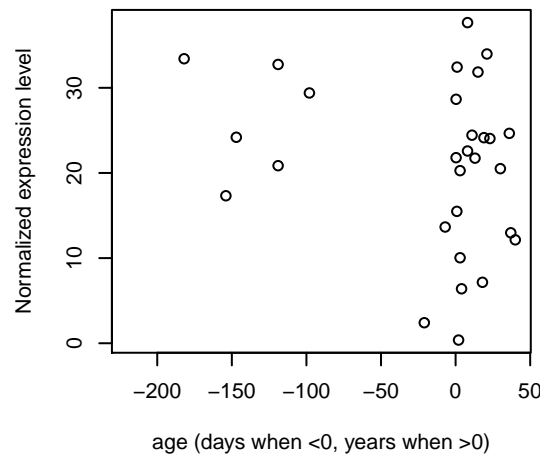

**OPA1\_193384958\_193385069**  
**(P=0.783, Diff = -0.93)**  
**cerebellar cortex**

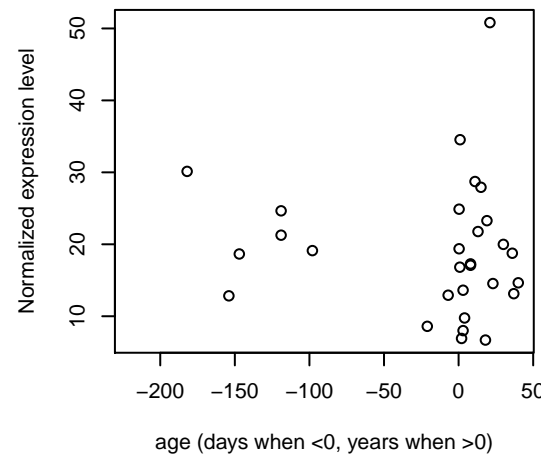

**OPA1\_193385159\_193385244**  
**(P=0.4804, Diff = 0.06)**  
**cerebellar cortex**

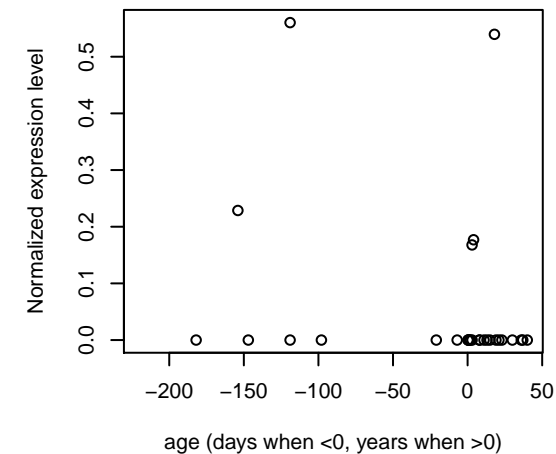

**OPA1\_193386103\_193386720**  
(P=0.8021, Diff = 0.01)  
cerebellar cortex

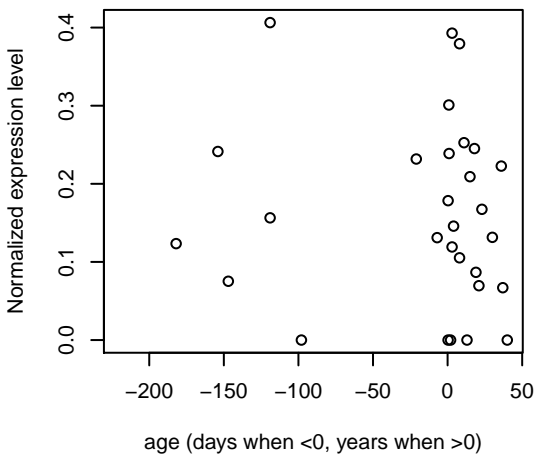

**OPA1\_193409182\_193409921**  
(P=0.691, Diff = 0.15)  
cerebellar cortex

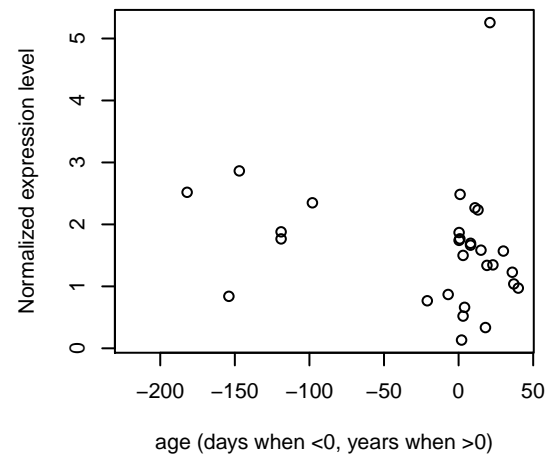

**OPA1\_193412394\_193415612**  
(P=0.1673, Diff = 2.97)  
cerebellar cortex

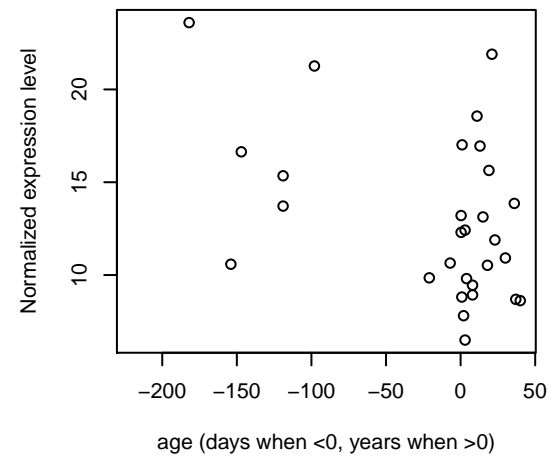

**ZMAT4\_40388108\_40389757**  
(P=0, Diff = 4.81)  
cerebellar cortex

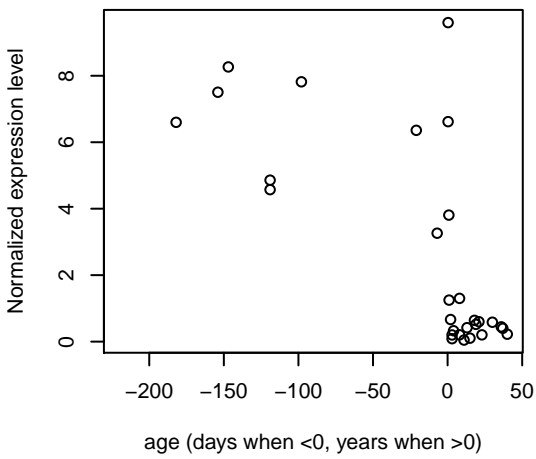

**ZMAT4\_40438683\_40438780**  
(P=7e-04, Diff = 6.38)  
cerebellar cortex

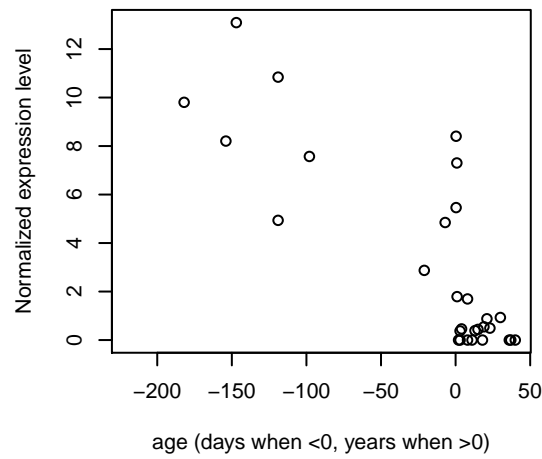

**ZMAT4\_40531882\_40532450**  
(P=0.0014, Diff = 1.39)  
cerebellar cortex

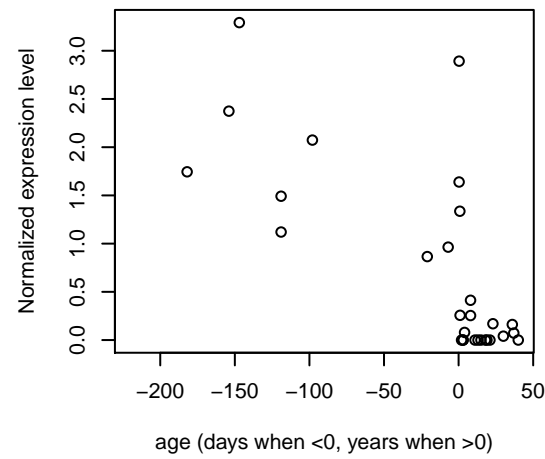

**ZMAT4\_40554514\_40554920**  
(P=8e-04, Diff = 1.36)  
cerebellar cortex

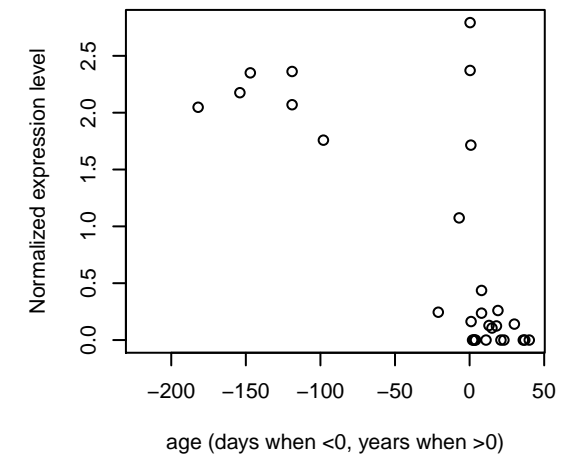

**ZMAT4\_40625159\_40625249**  
(P=9e-04, Diff = 4)  
cerebellar cortex

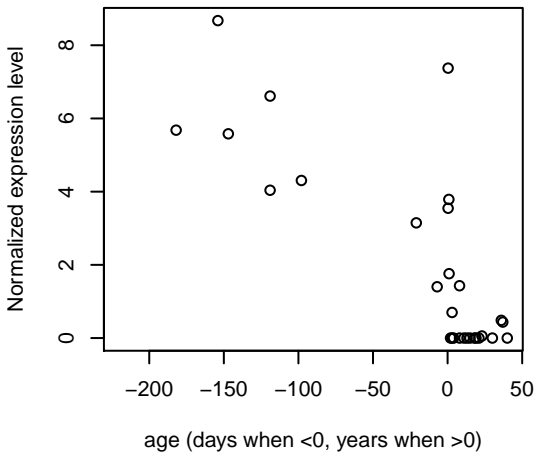

**ZMAT4\_40644207\_40644301**  
(P=0.1453, Diff = 0.29)  
cerebellar cortex

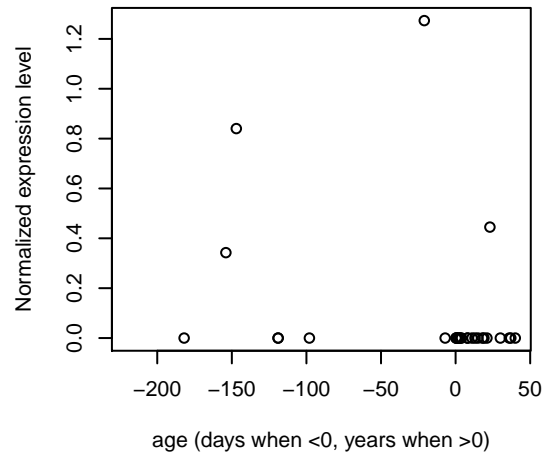

**ZMAT4\_40666027\_40666090**  
(P=0.0838, Diff = 0.32)  
cerebellar cortex

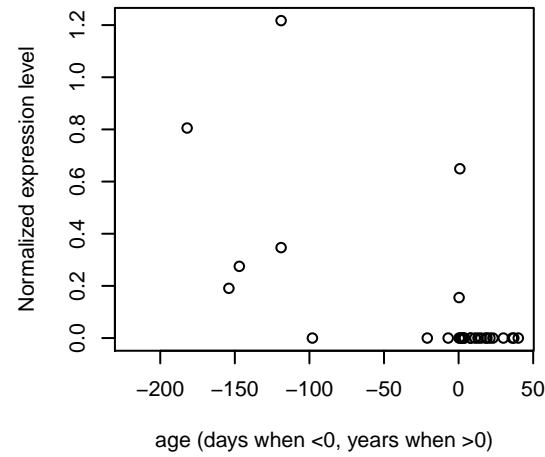

**ZMAT4\_40683093\_40683199**  
(P=0.0606, Diff = 3.1)  
cerebellar cortex

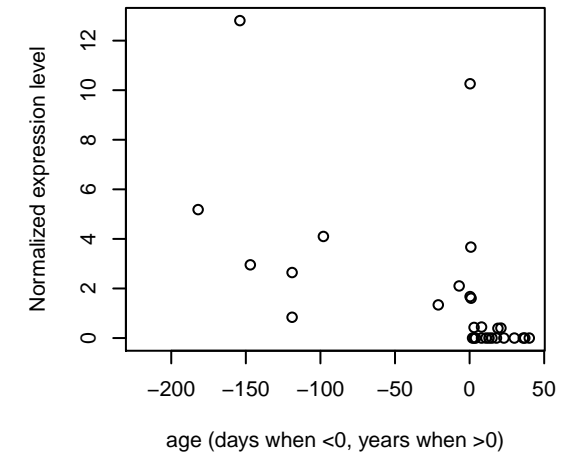

**ZMAT4\_40742047\_40742463**  
(P=0.1167, Diff = 0.05)  
cerebellar cortex

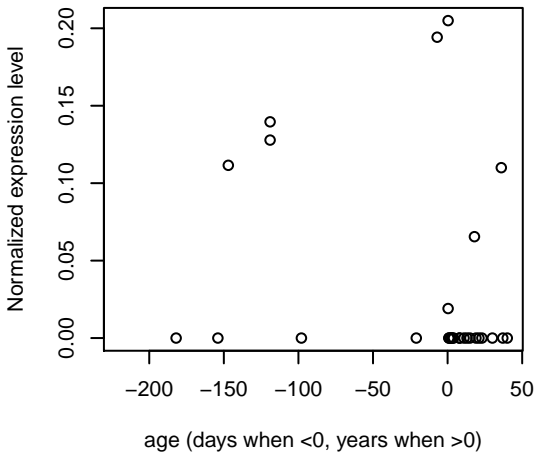

**ZMAT4\_40746013\_40746064**  
(P=0.3293, Diff = 0)  
cerebellar cortex

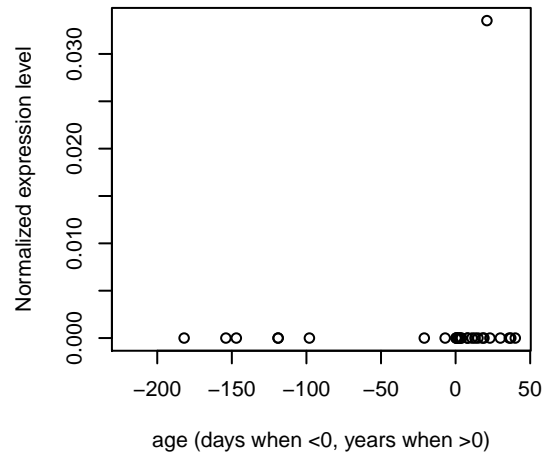

**ZMAT4\_40755201\_40755352**  
(P=0.1006, Diff = 1.13)  
cerebellar cortex

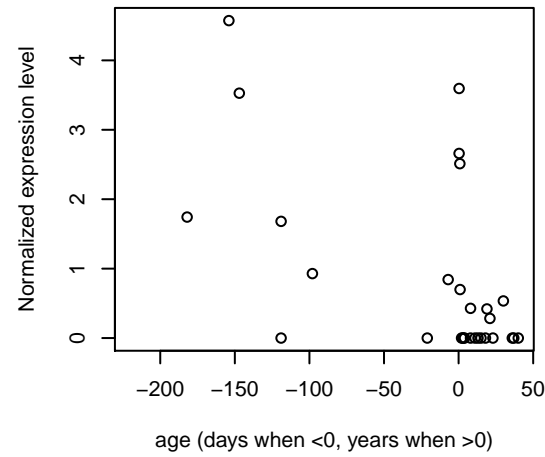

**CNDP1\_72201674\_72201926**  
(P=0, Diff = -4.17)  
cerebellar cortex

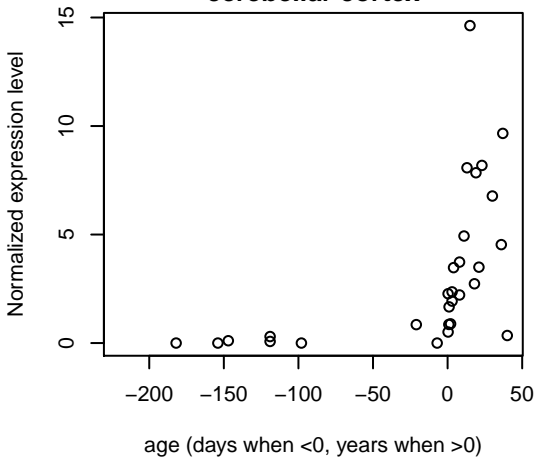

**CNDP1\_72223572\_72223701**  
(P=0, Diff = -11.68)  
cerebellar cortex

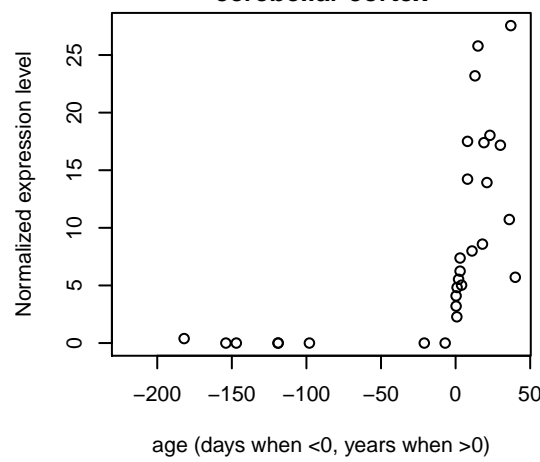

**CNDP1\_72226557\_72226707**  
(P=0, Diff = -13.05)  
cerebellar cortex

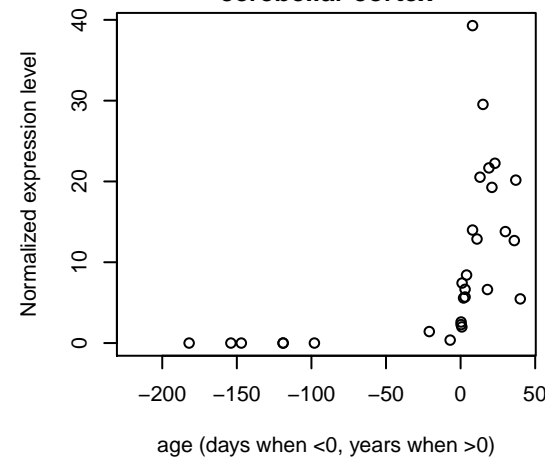

**CNDP1\_72228090\_72228253**  
(P=0, Diff = -18.06)  
cerebellar cortex

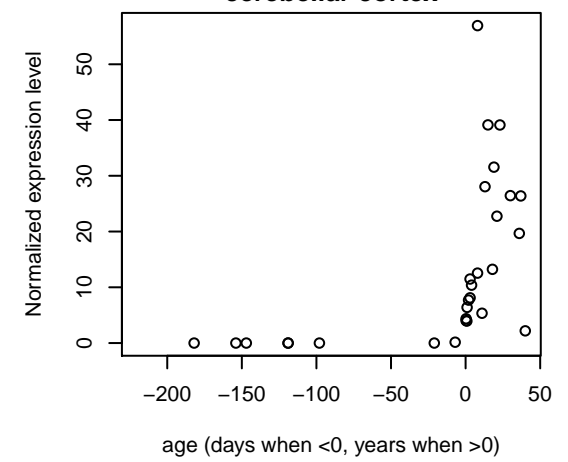

**CNDP1\_72229281\_72229370**  
(P=0, Diff = -24.63)  
cerebellar cortex

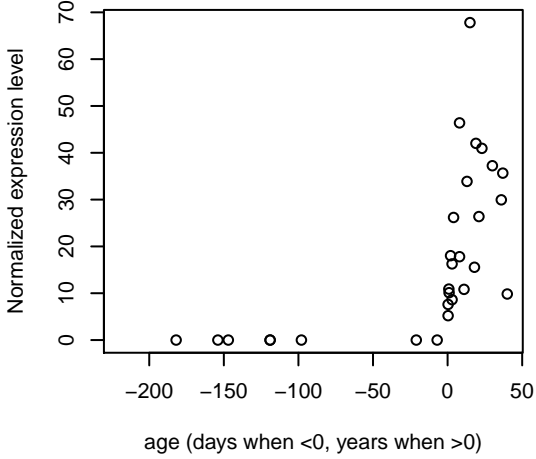

**CNDP1\_72234467\_72234668**  
(P=0, Diff = -27.14)  
cerebellar cortex

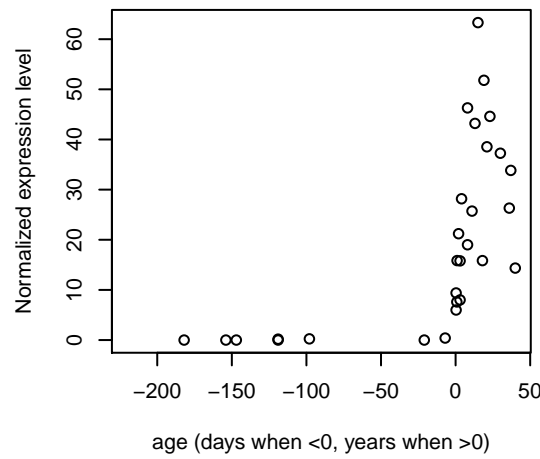

**CNDP1\_72238420\_72238505**  
(P=0, Diff = -27.51)  
cerebellar cortex

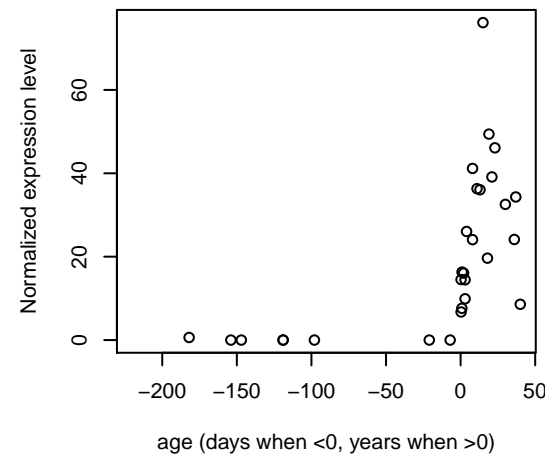

**CNDP1\_72244103\_72244264**  
(P=0, Diff = -21.07)  
cerebellar cortex

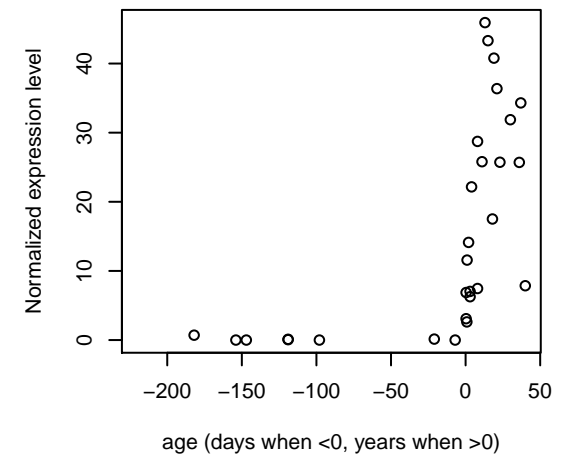

**CNDP1\_72245397\_72245562**  
(P=0, Diff = -25.77)  
cerebellar cortex

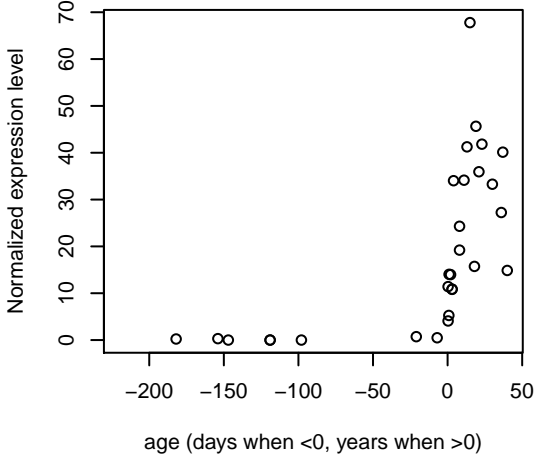

**CNDP1\_72247365\_72247507**  
(P=0, Diff = -32.04)  
cerebellar cortex

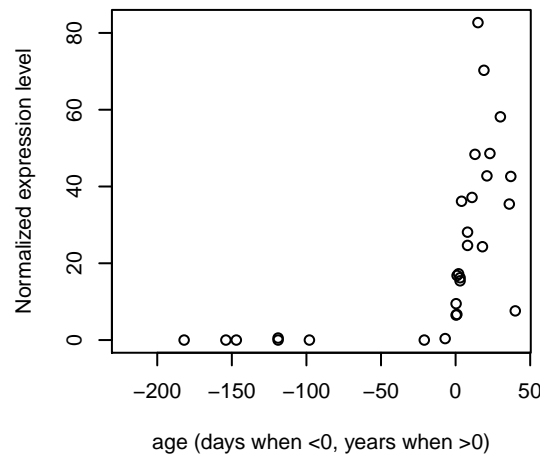

**CNDP1\_72250796\_72250944**  
(P=0, Diff = -29.91)  
cerebellar cortex

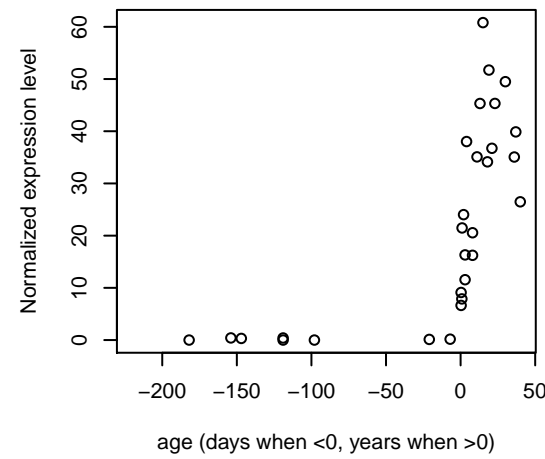

**CNDP1\_72251731\_72252261**  
(P=0, Diff = -19.97)  
cerebellar cortex

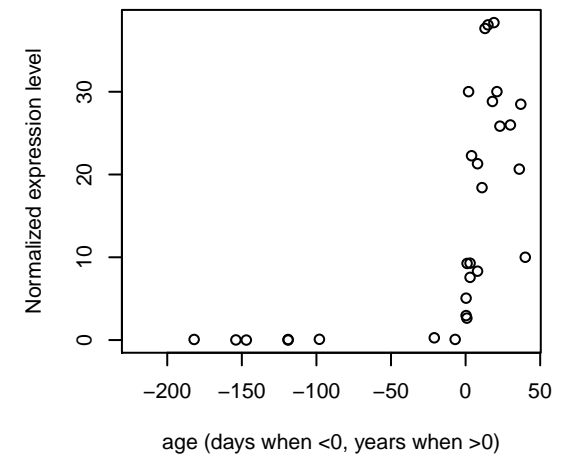

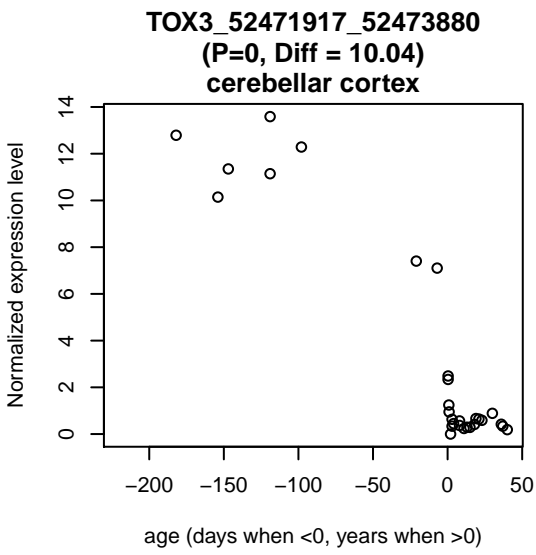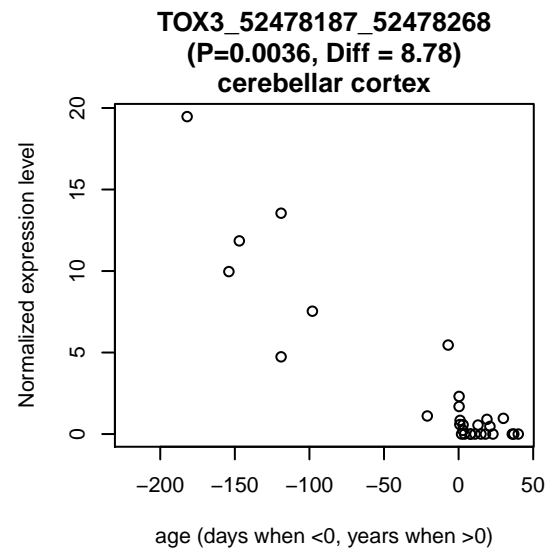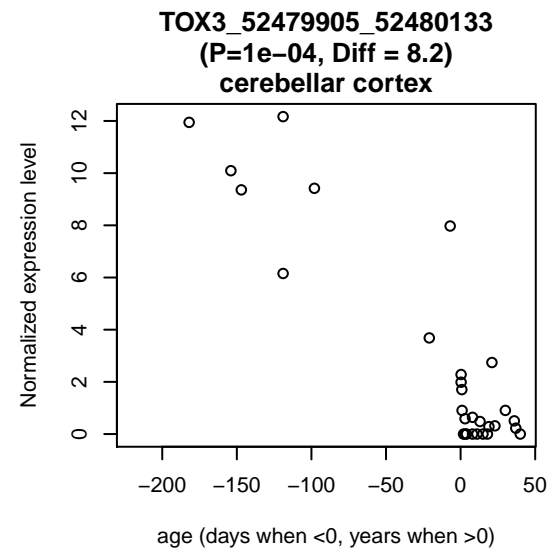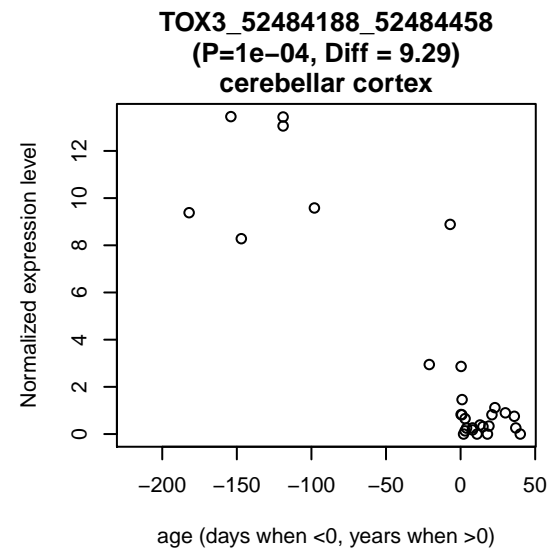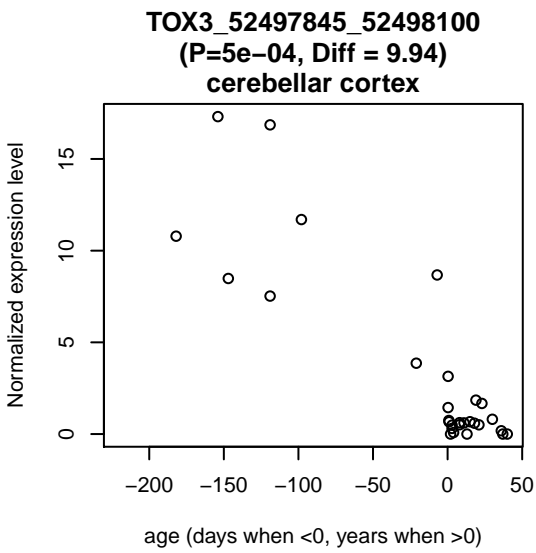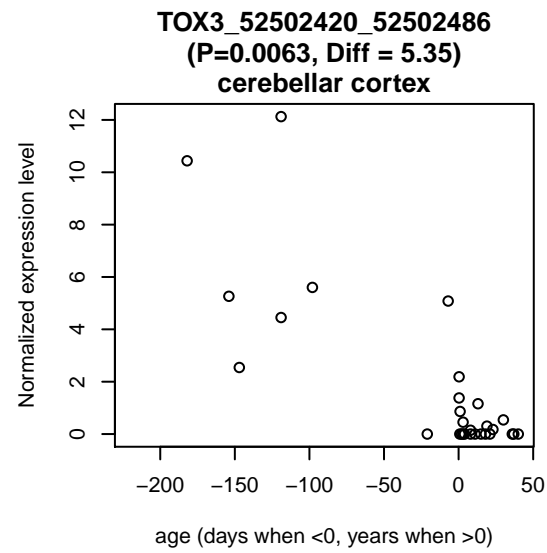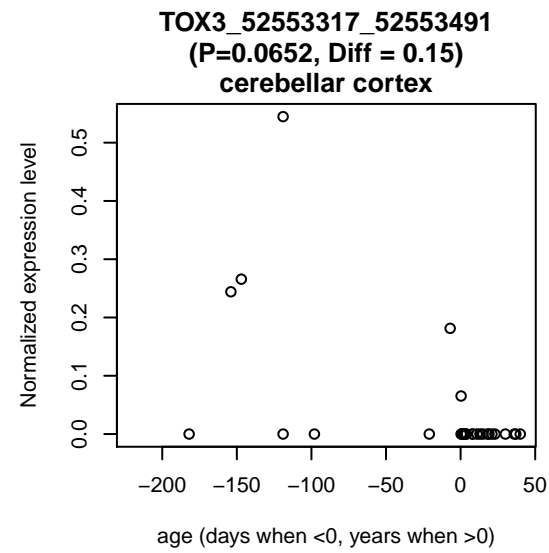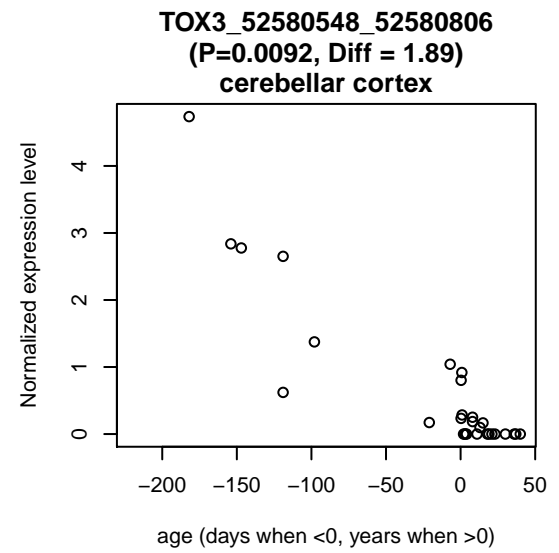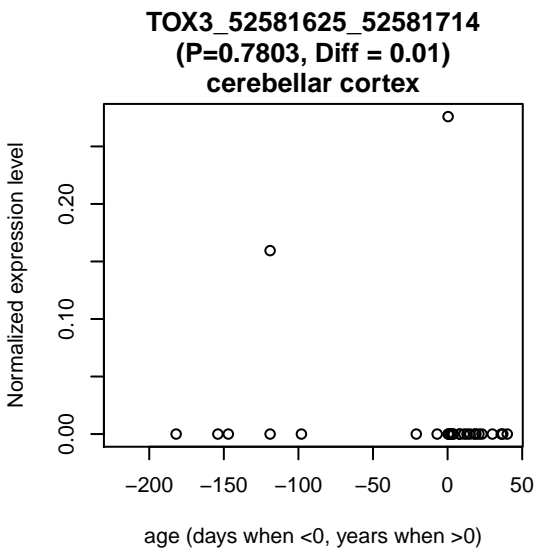

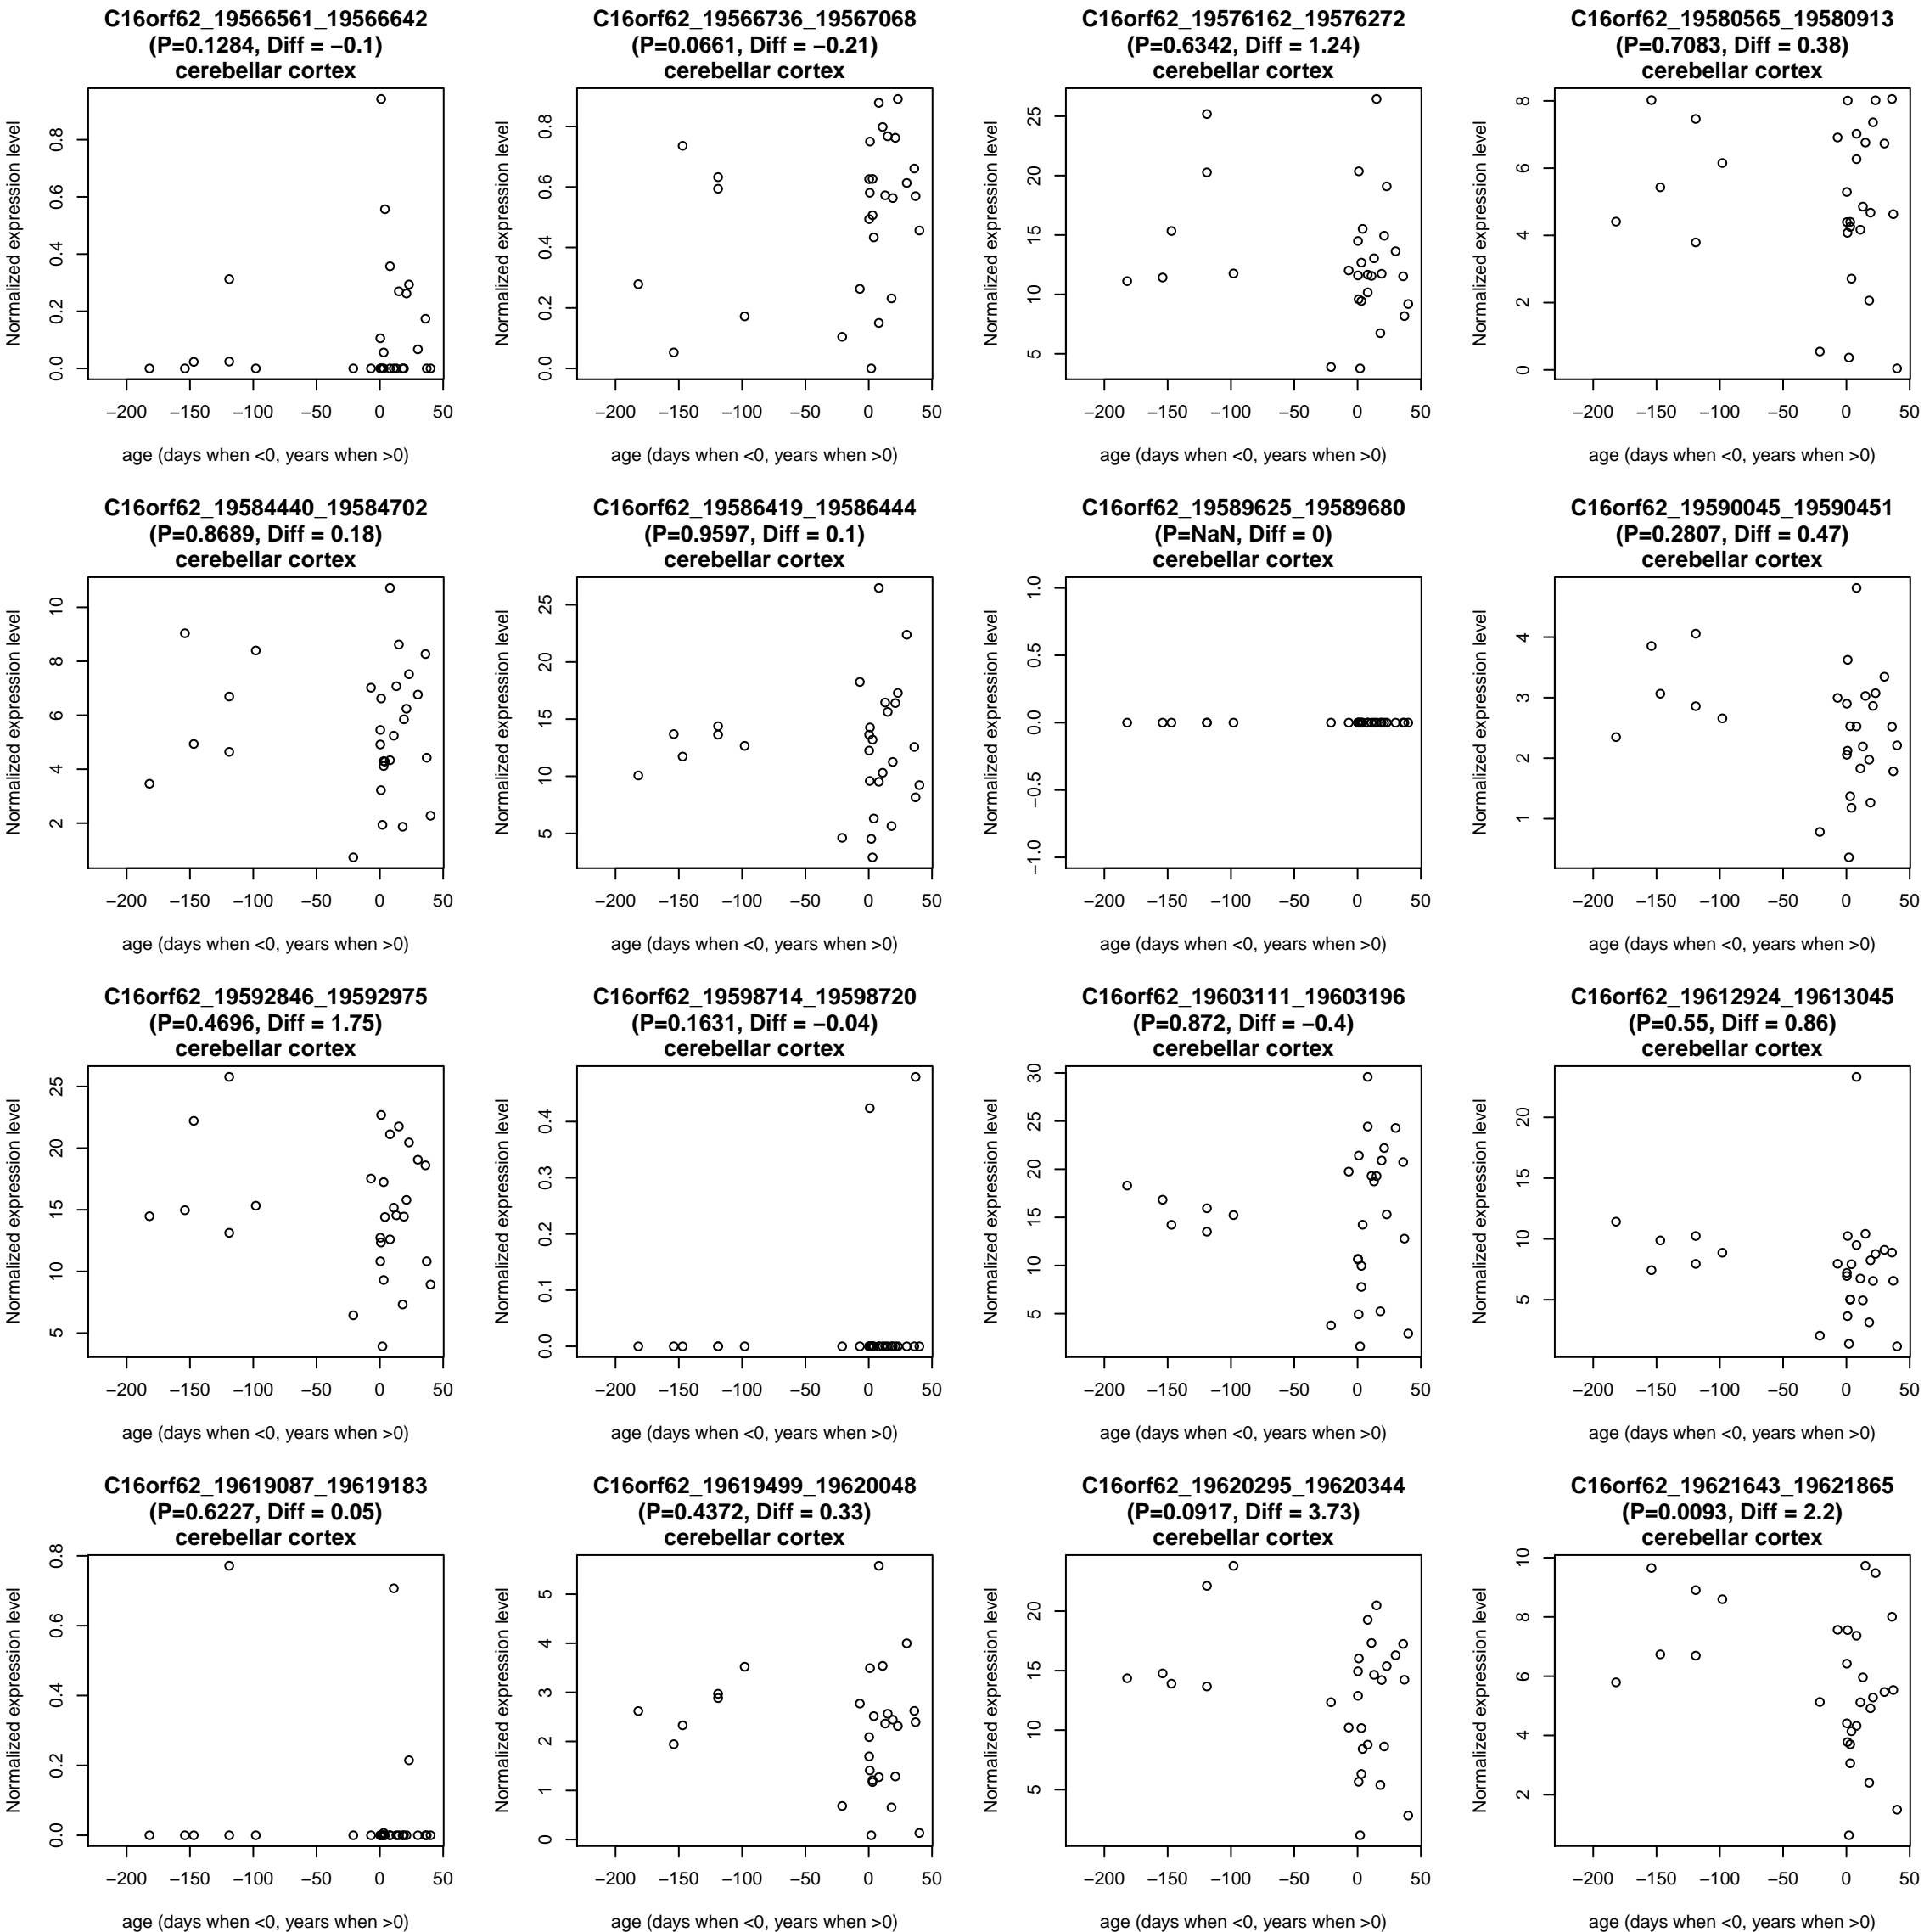



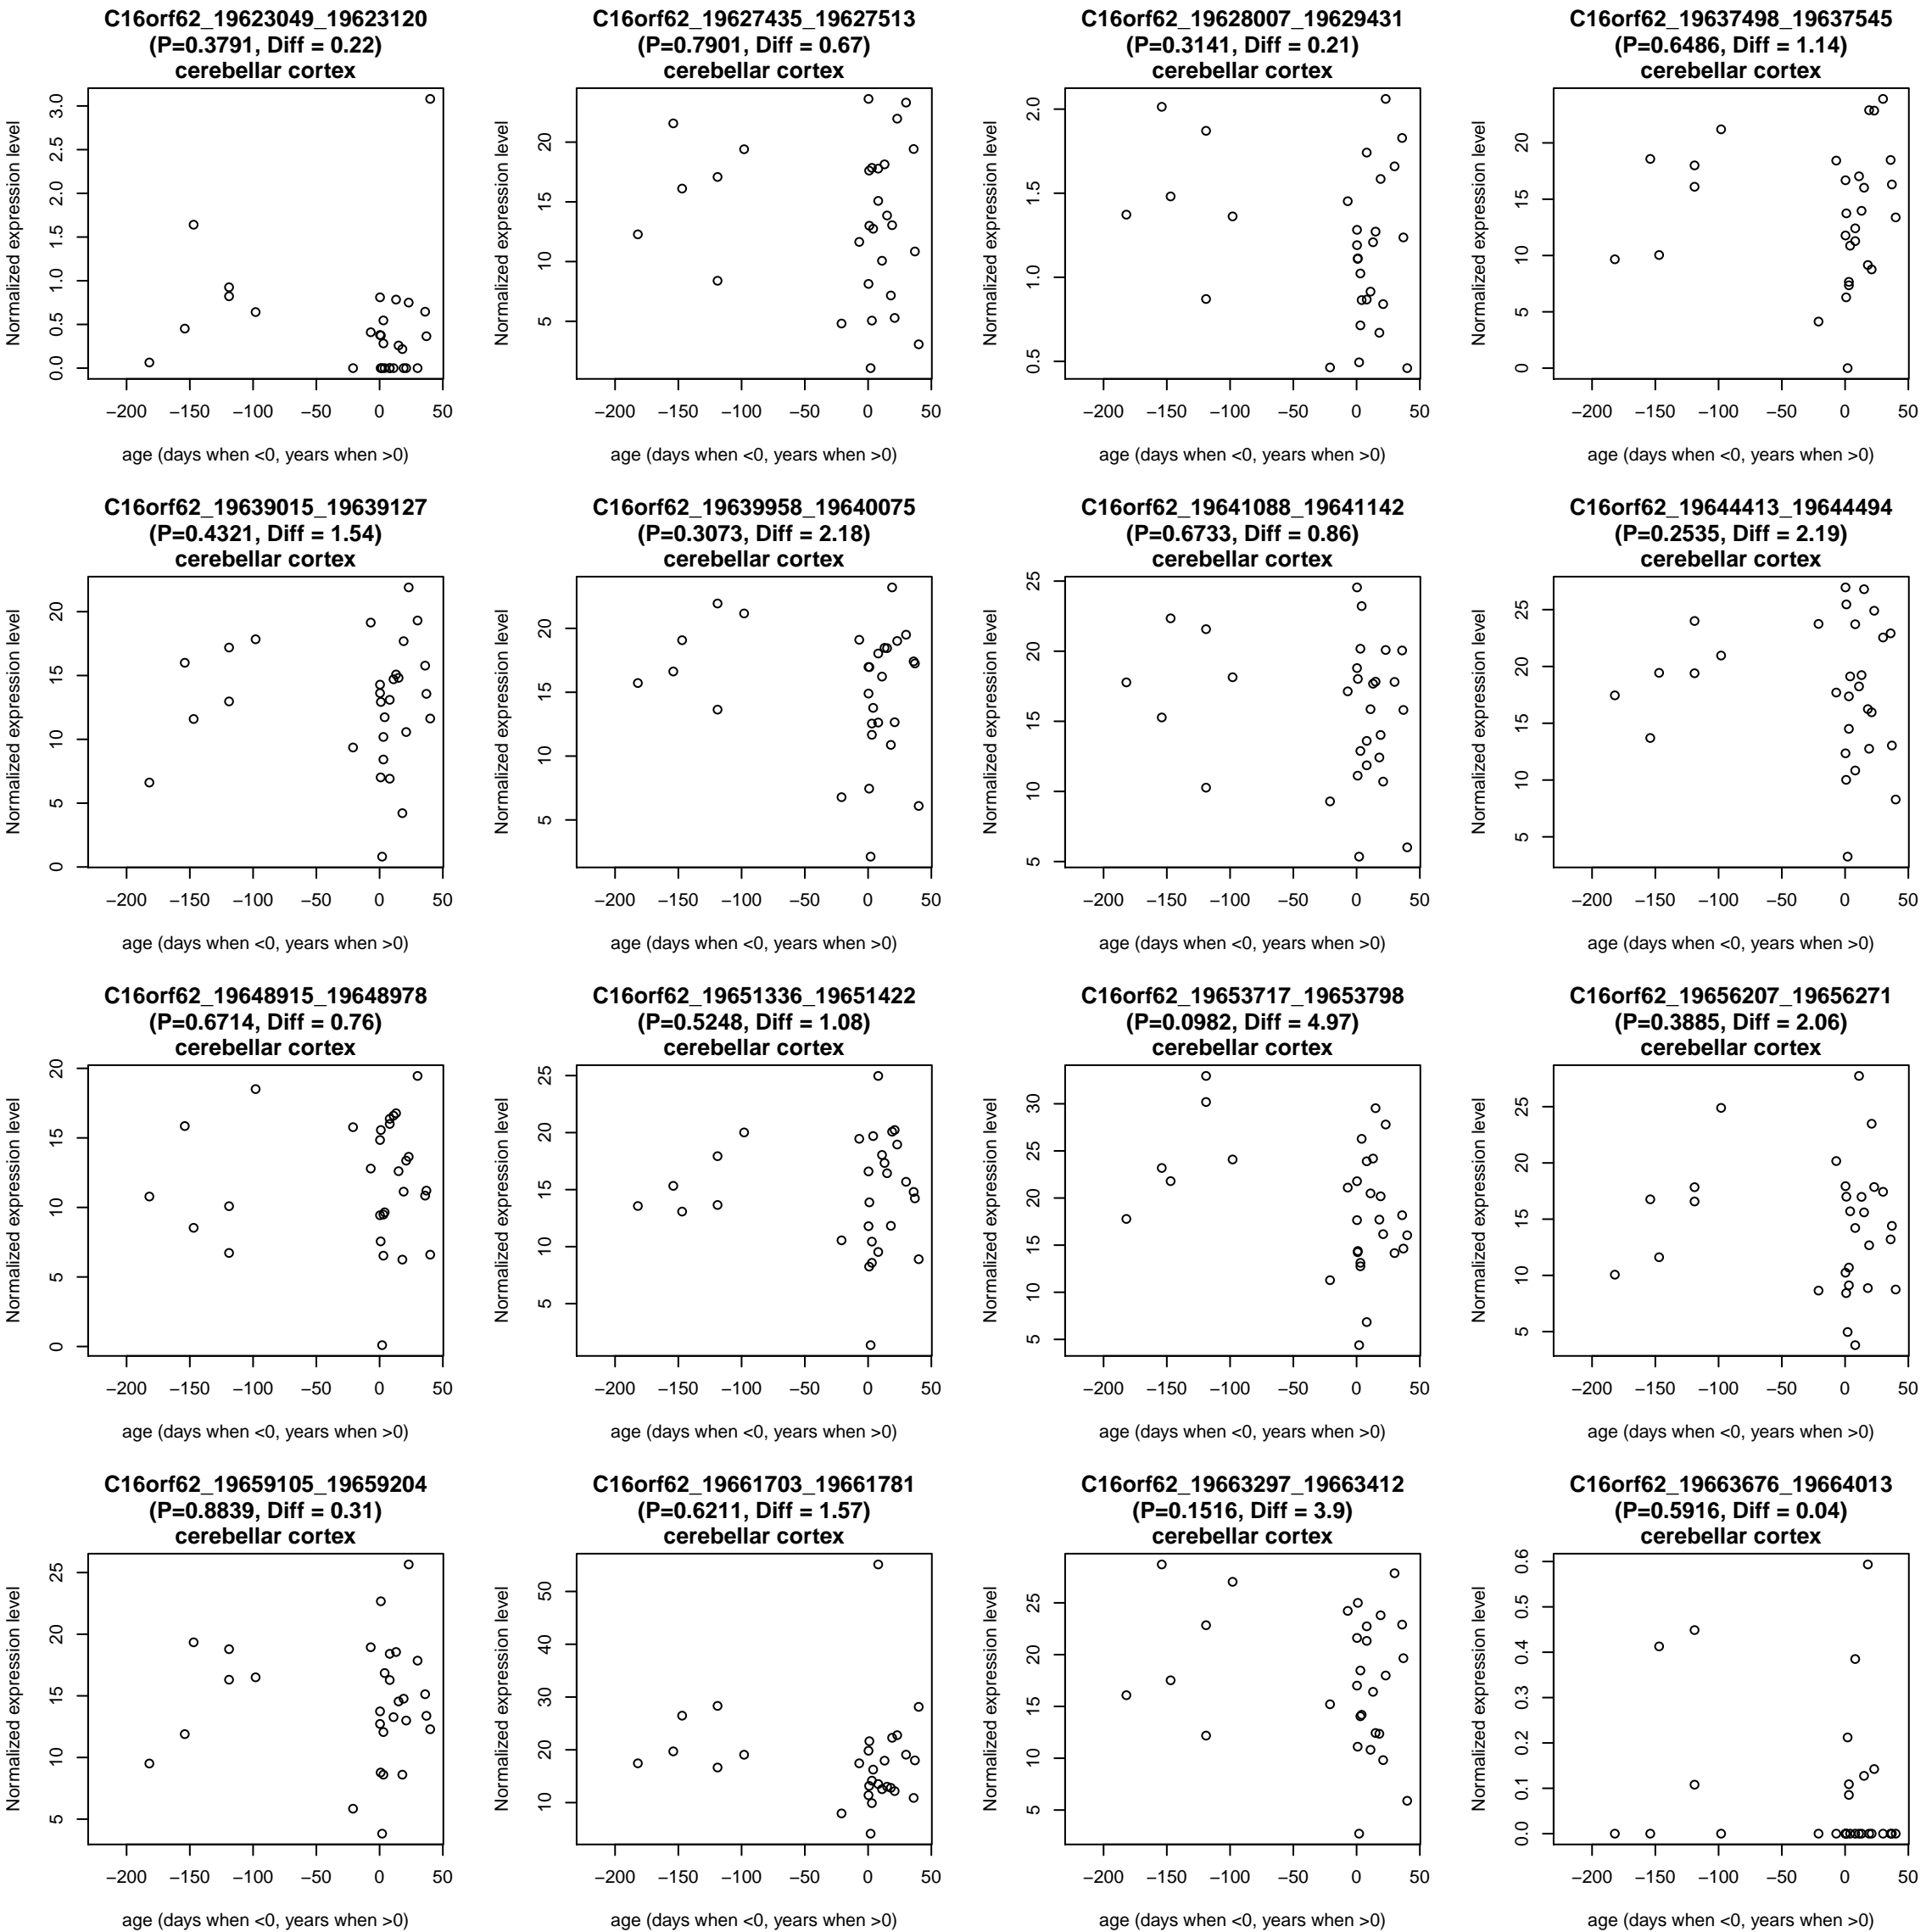

**C16orf62\_19680481\_19680621**  
(P=0.4849, Diff = 1.47)  
cerebellar cortex

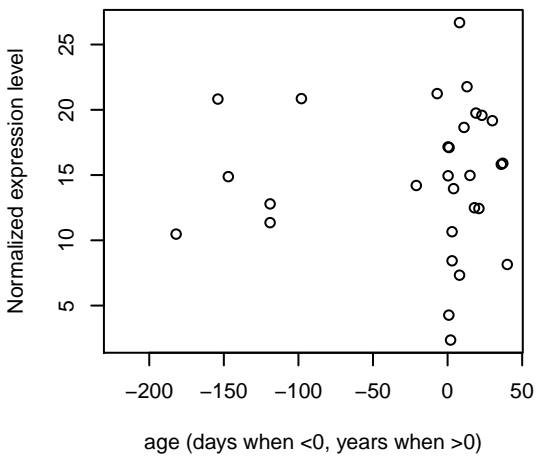

**C16orf62\_19693546\_19693712**  
(P=0.1079, Diff = 4.08)  
cerebellar cortex

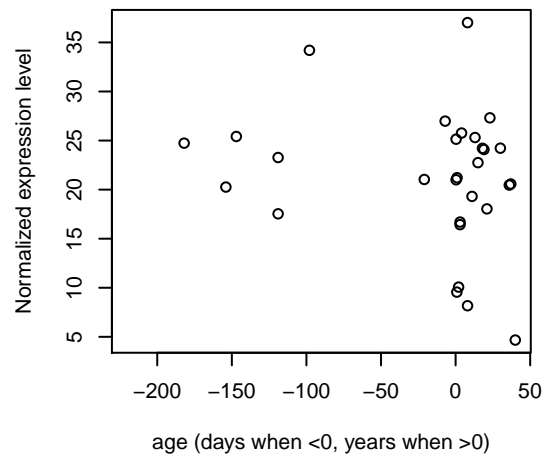

**C16orf62\_19702674\_19702793**  
(P=0.764, Diff = 0.64)  
cerebellar cortex

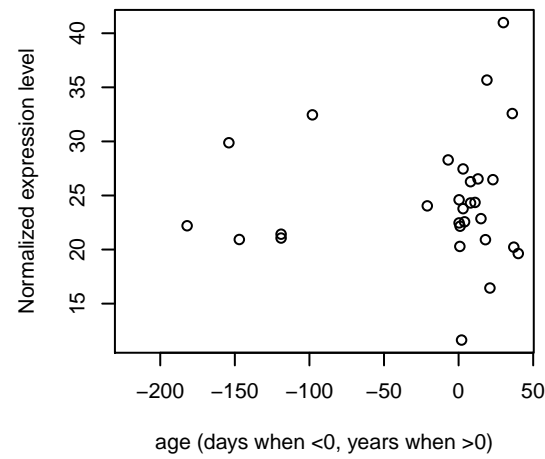

**C16orf62\_19710823\_19710970**  
(P=0.5474, Diff = 1.83)  
cerebellar cortex

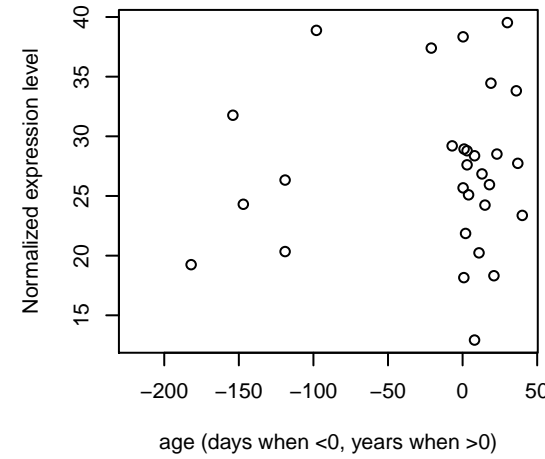

**C16orf62\_19711699\_19712448**  
(P=0.1006, Diff = 2.69)  
cerebellar cortex

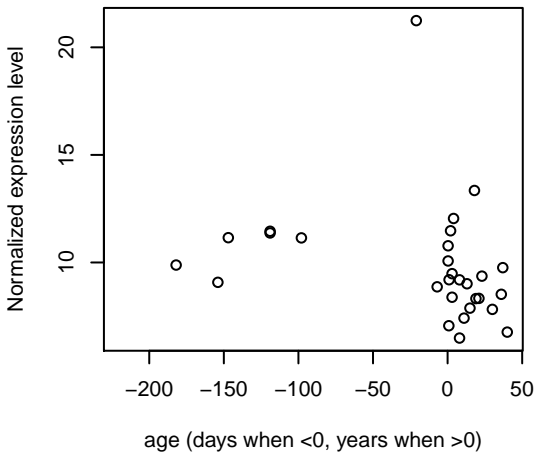

**C16orf62\_19716437\_19716880**  
(P=0.0556, Diff = 1)  
cerebellar cortex

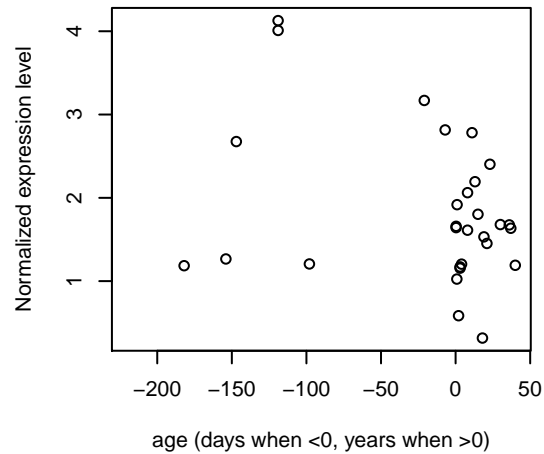

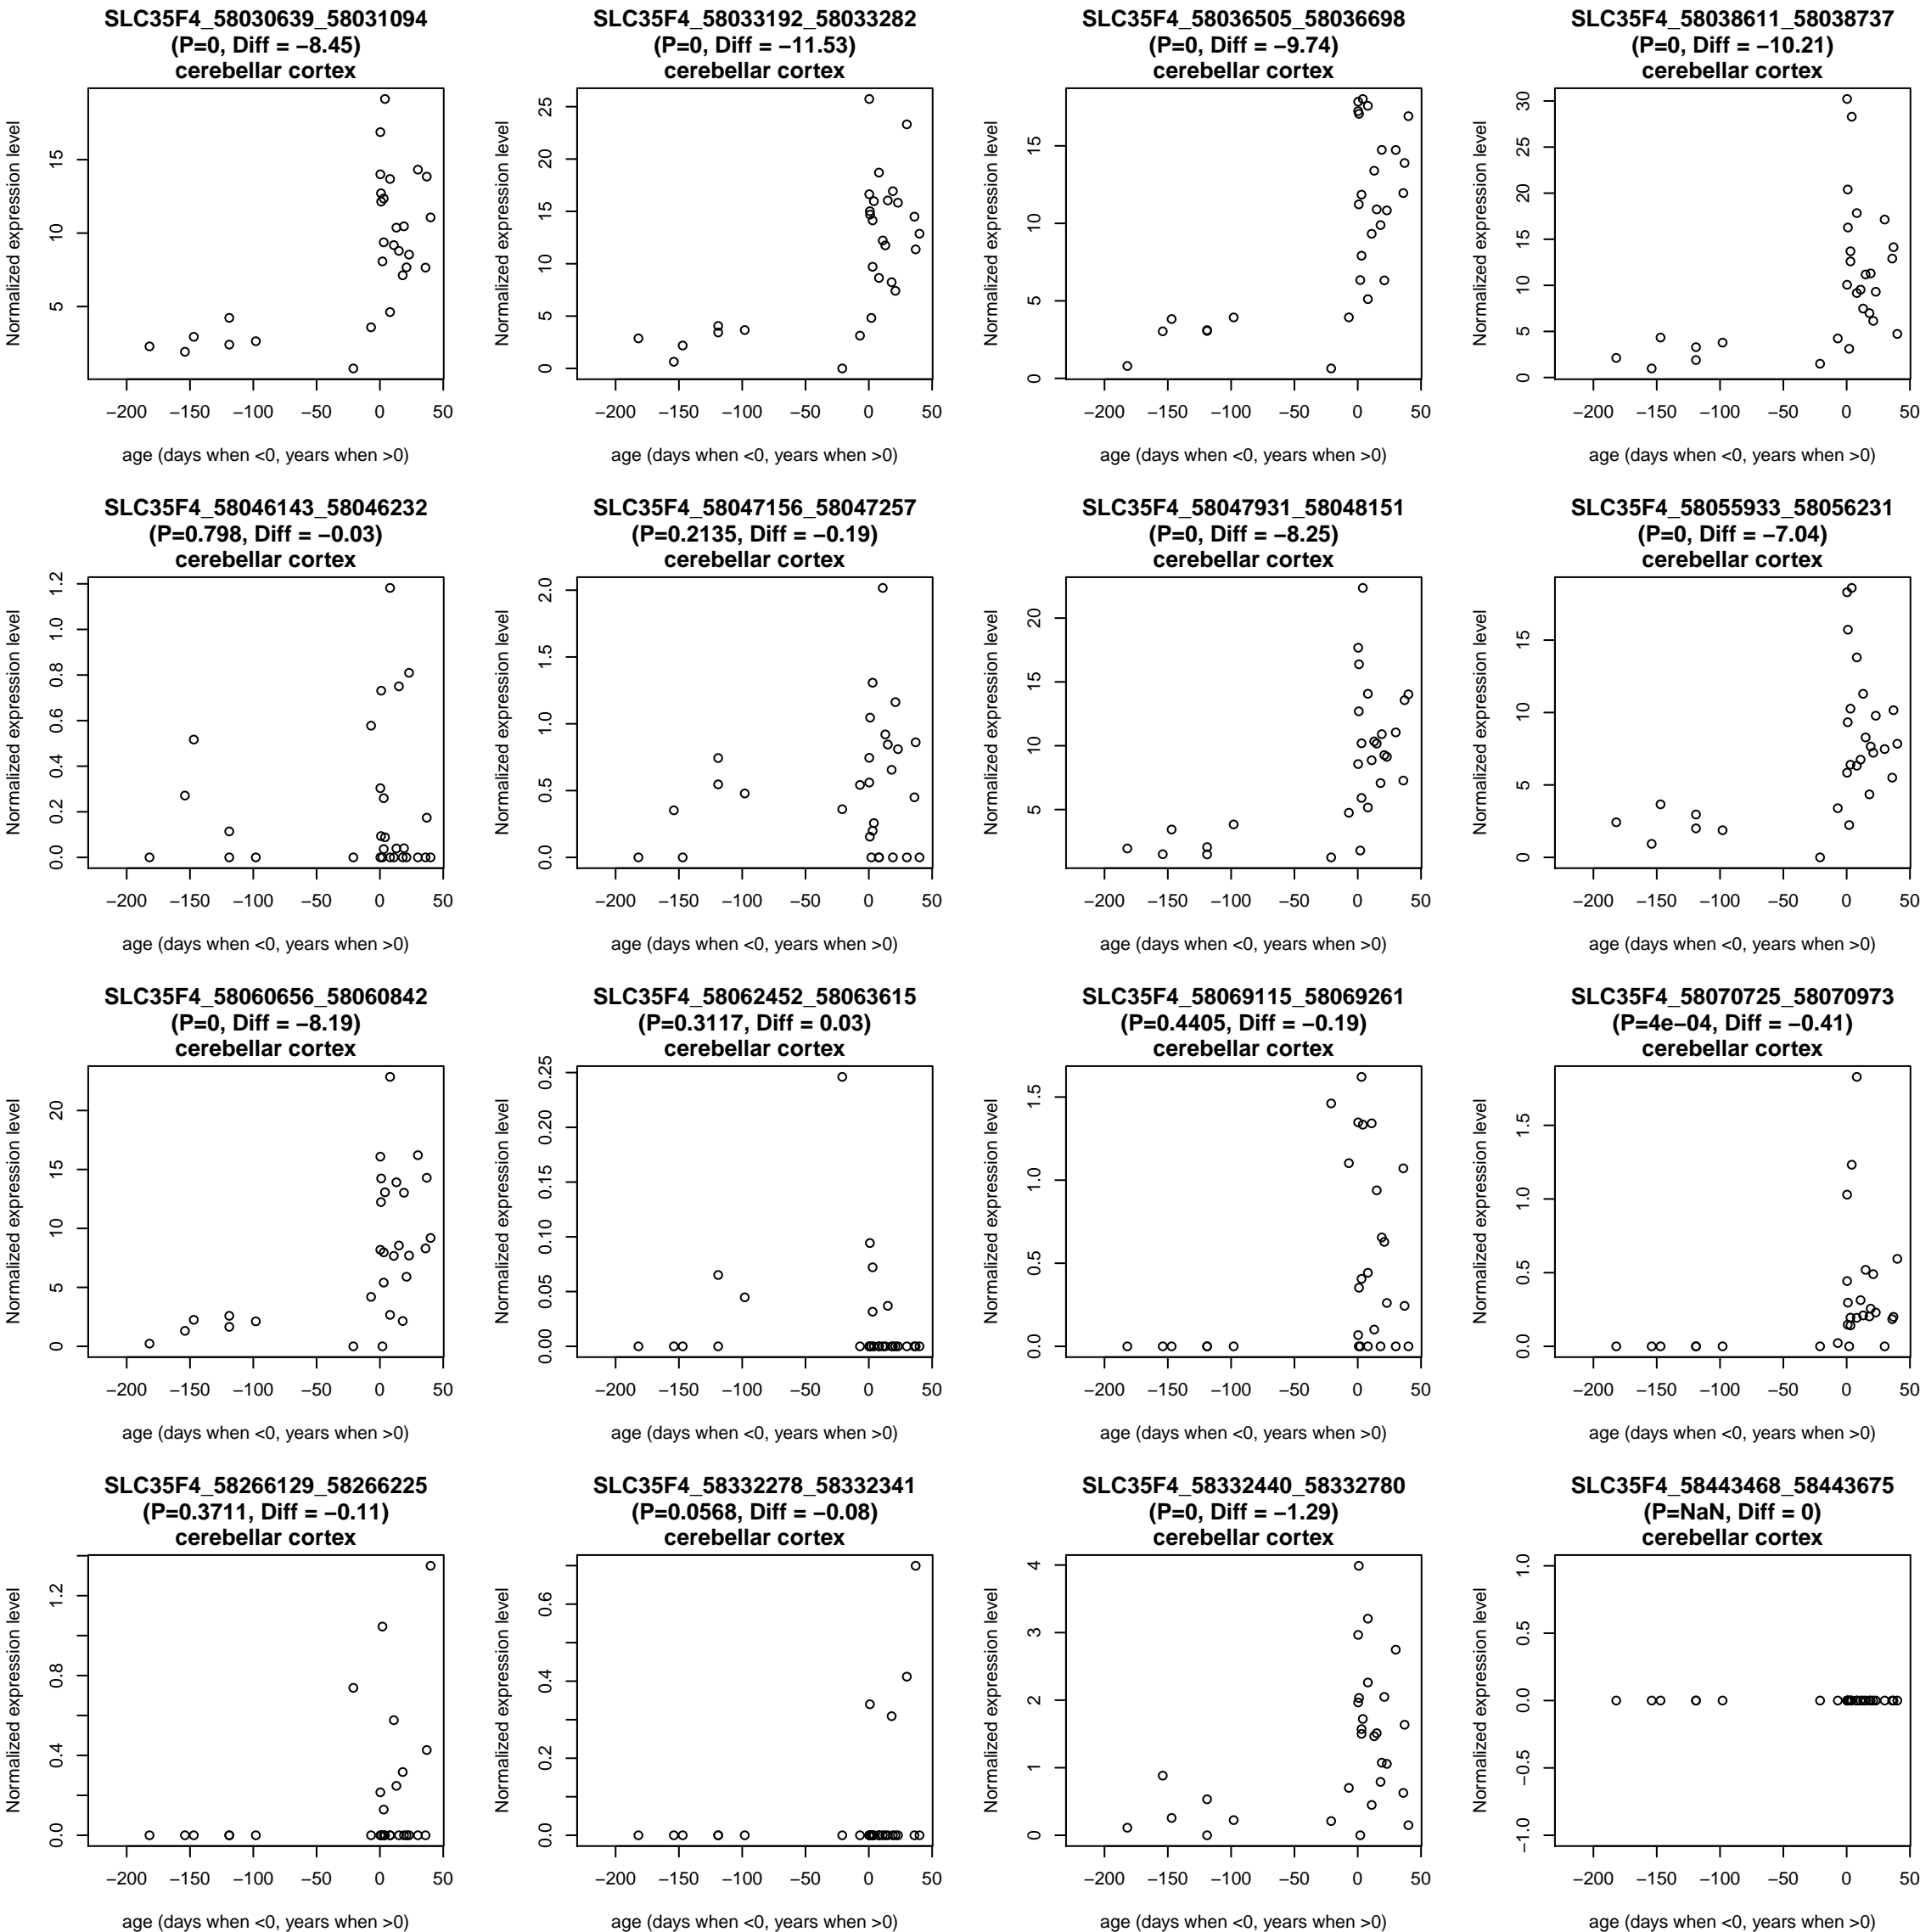

SLC35F4\_58448630\_58448912  
(P=NaN, Diff = 0)  
cerebellar cortex

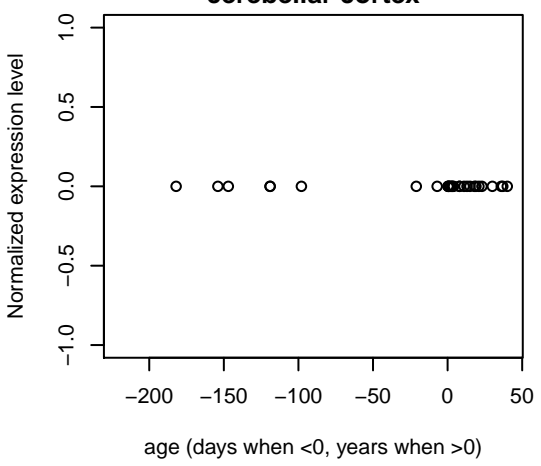

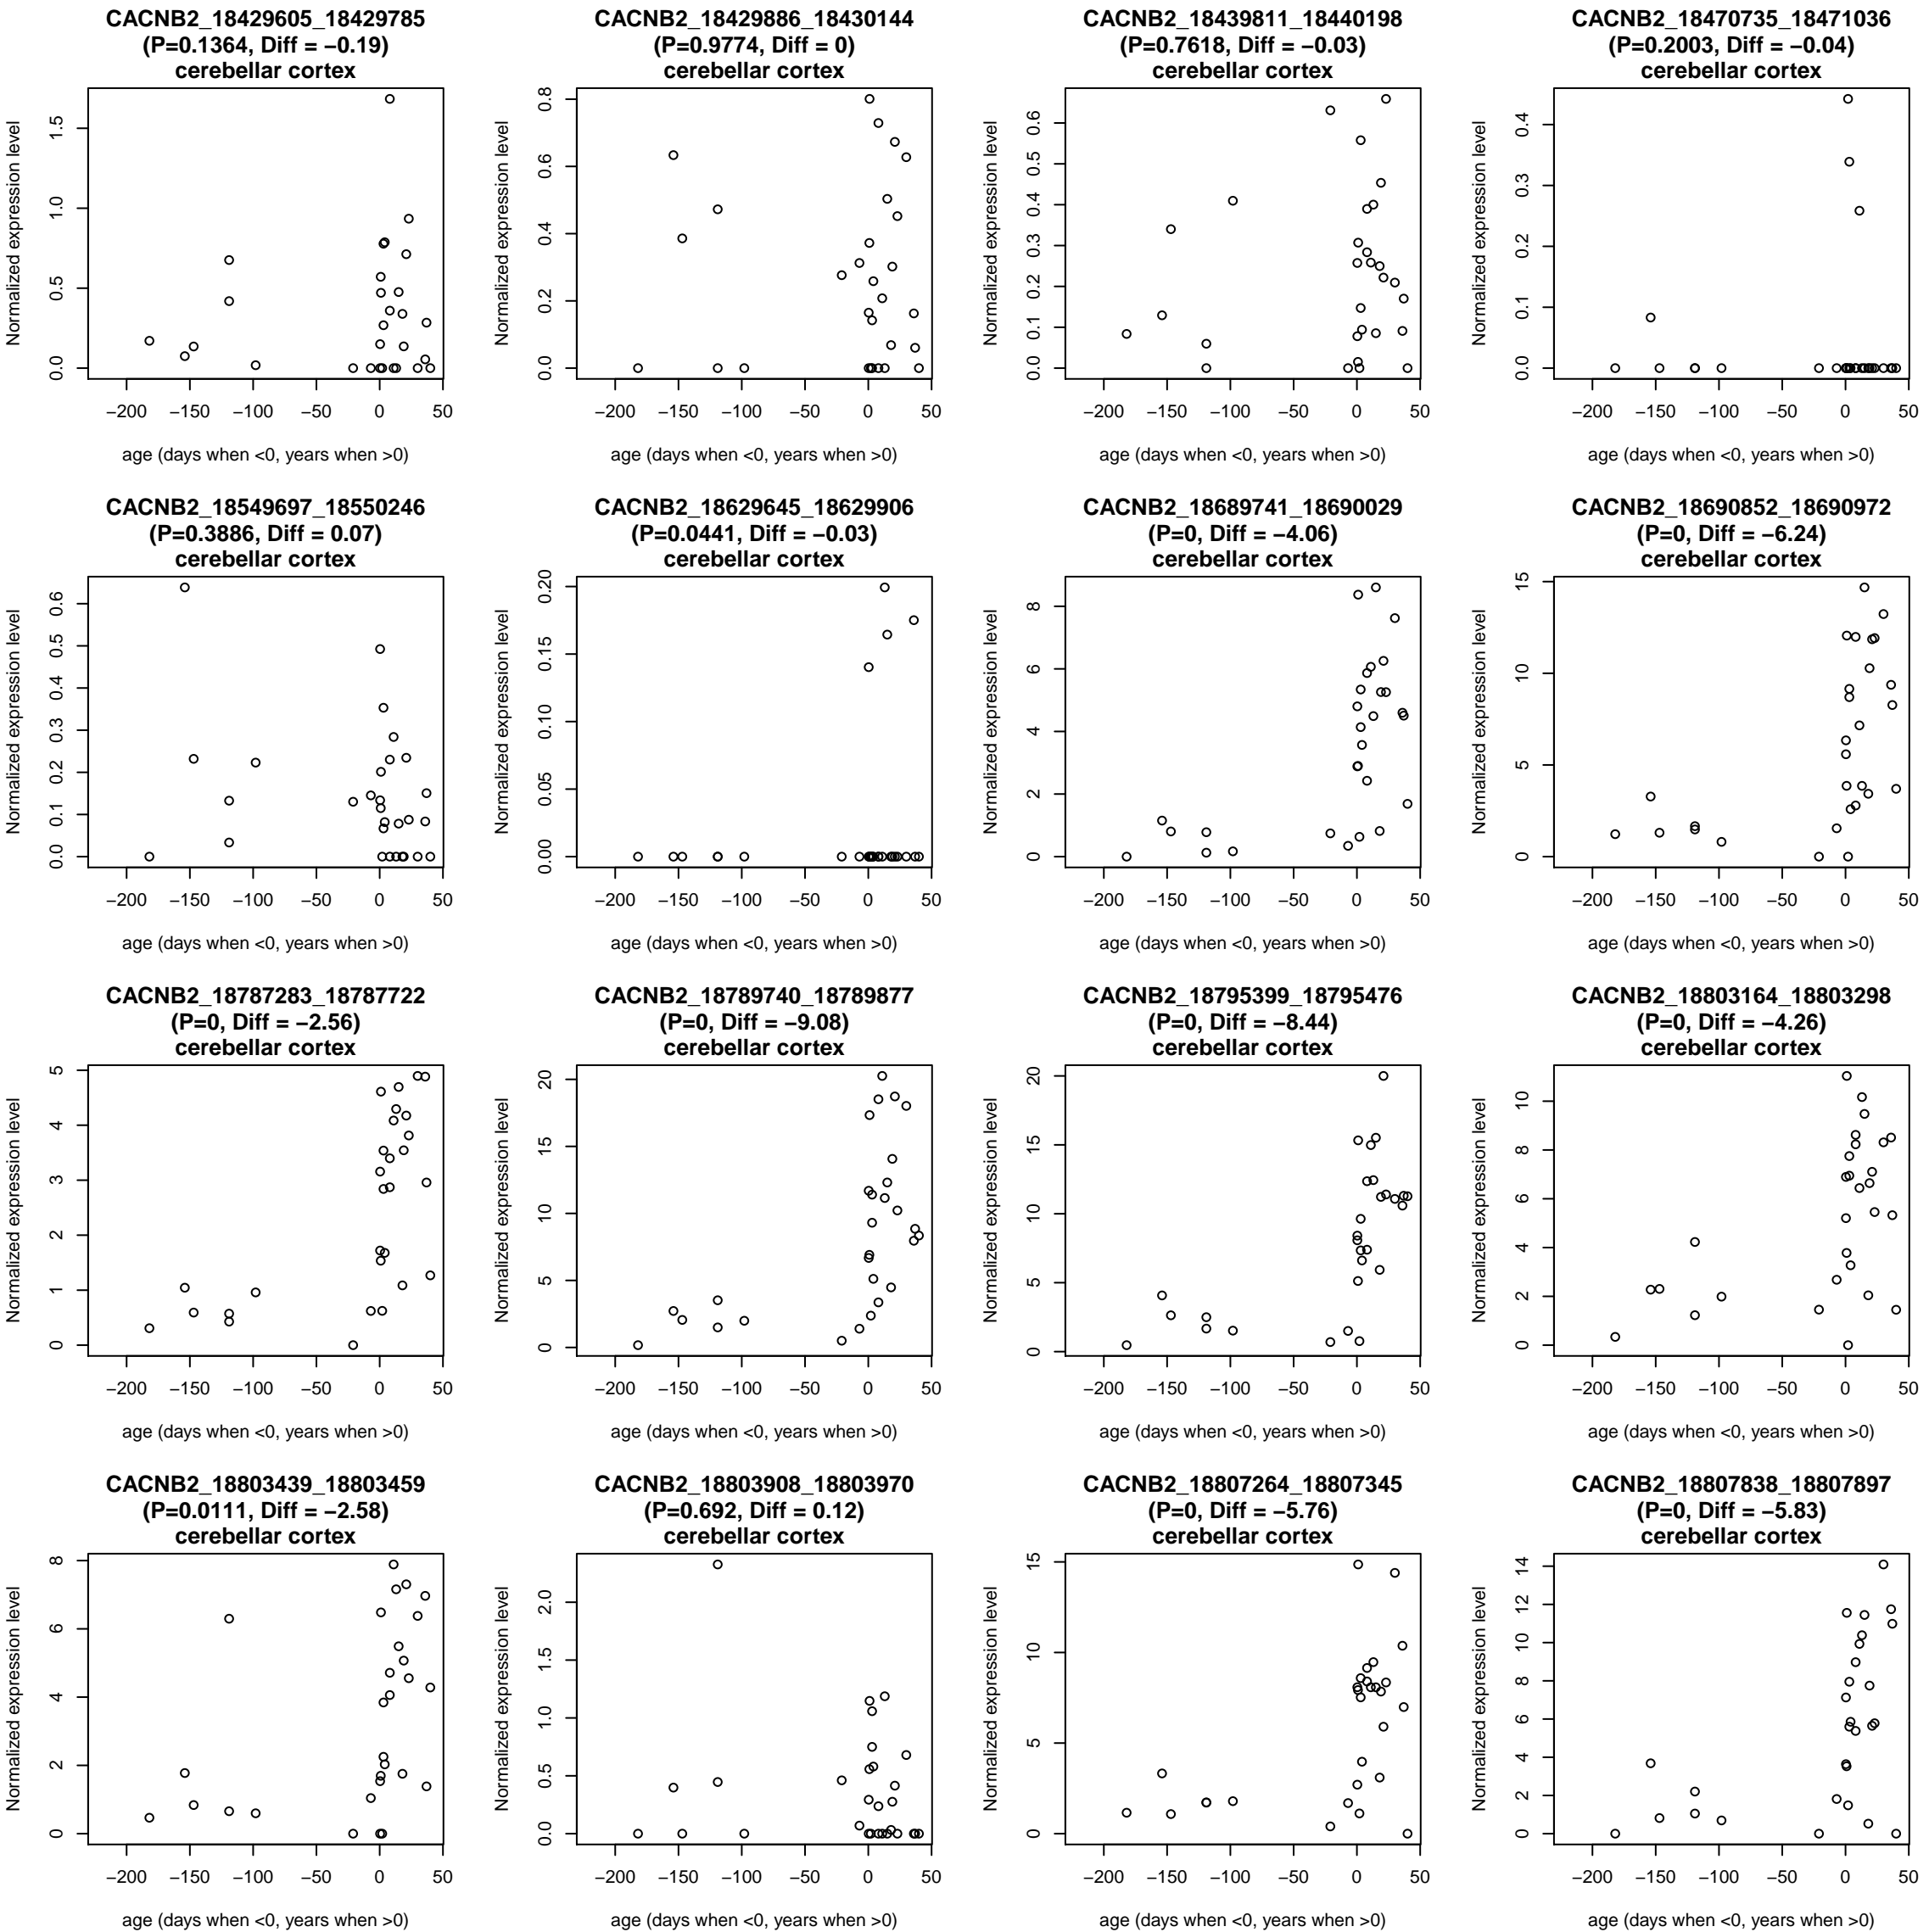

**CACNB2\_18816516\_18816626**  
(P=0, Diff = -8.94)  
cerebellar cortex

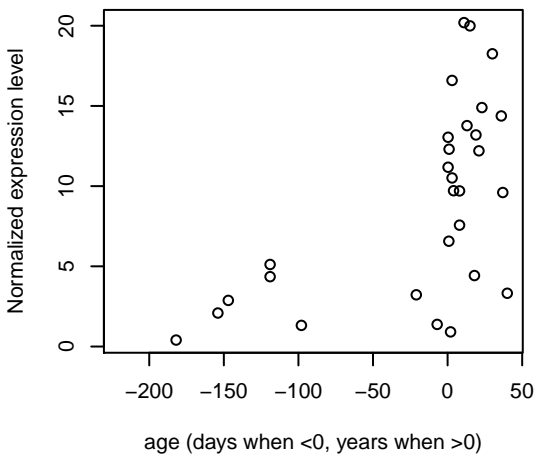

**CACNB2\_18823004\_18823156**  
(P=0, Diff = -7.86)  
cerebellar cortex

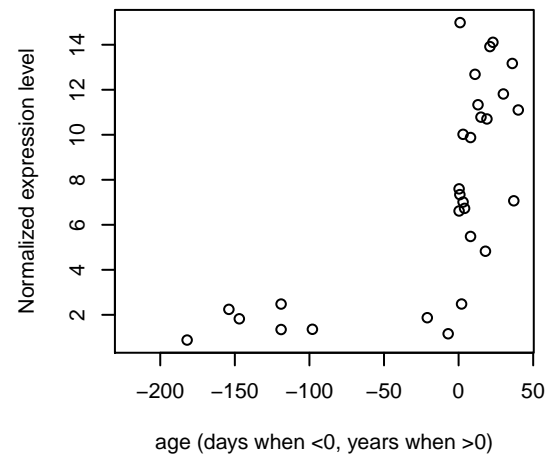

**CACNB2\_18825029\_18825125**  
(P=0, Diff = -7.8)  
cerebellar cortex

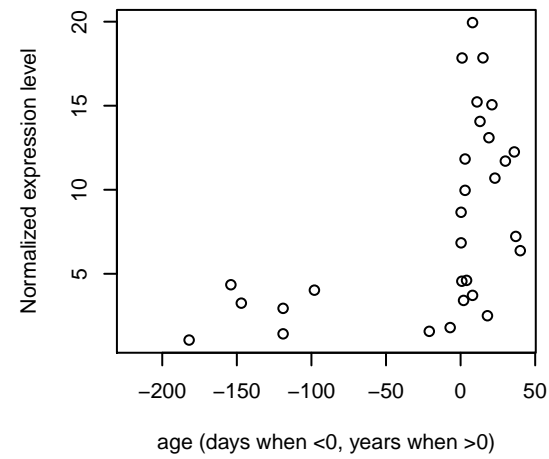

**CACNB2\_18827108\_18827294**  
(P=0, Diff = -10.36)  
cerebellar cortex

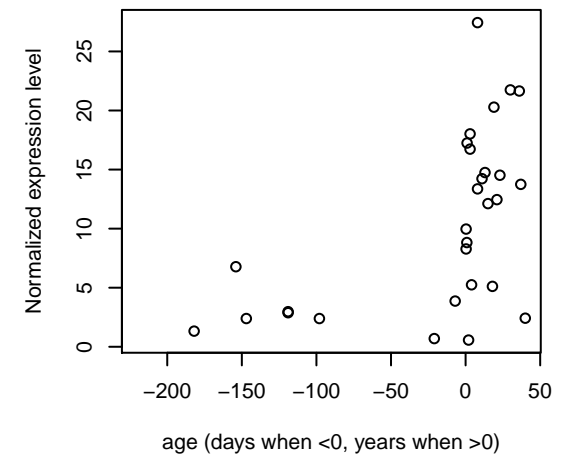

**CACNB2\_18828158\_18830798**  
(P=0, Diff = -6.33)  
cerebellar cortex

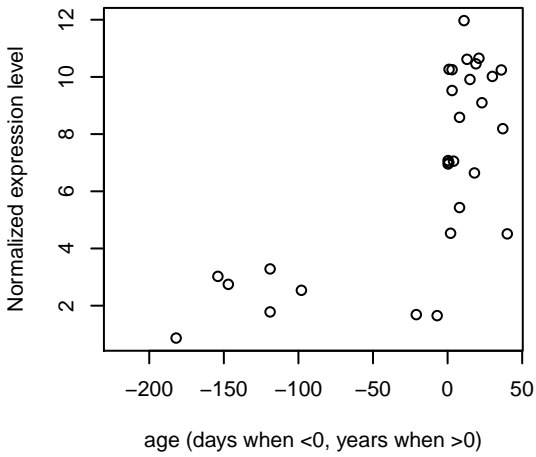

**CTH\_70876900\_70877266**  
(P=0.8087, Diff = 0.1)  
cerebellar cortex

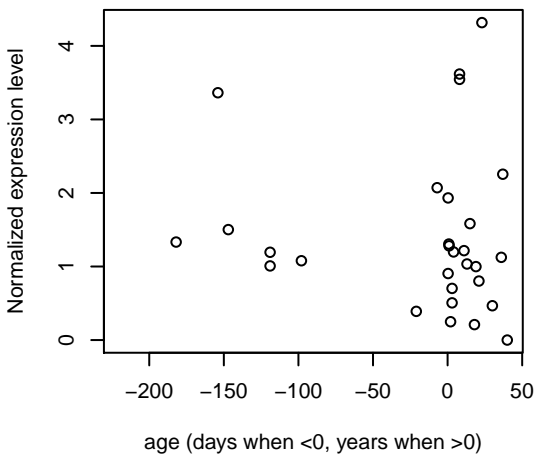

**CTH\_70881638\_70881720**  
(P=0.2796, Diff = 0.47)  
cerebellar cortex

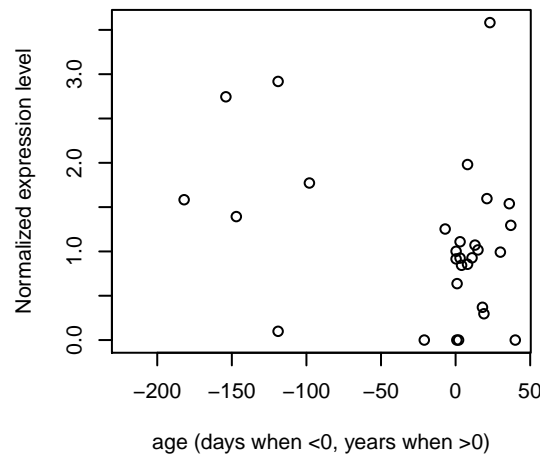

**CTH\_70883619\_70883715**  
(P=0.2404, Diff = 0.34)  
cerebellar cortex

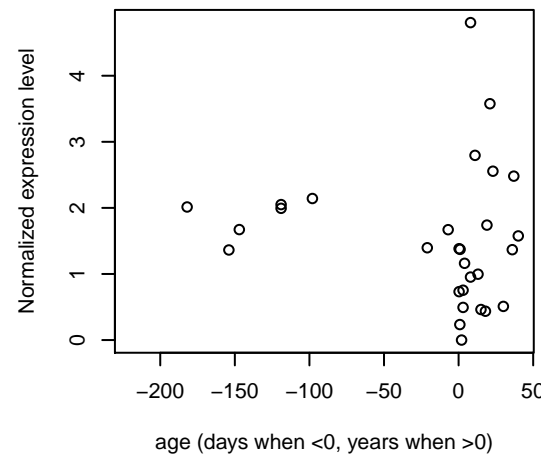

**CTH\_70887248\_70887358**  
(P=0.0629, Diff = 1.16)  
cerebellar cortex

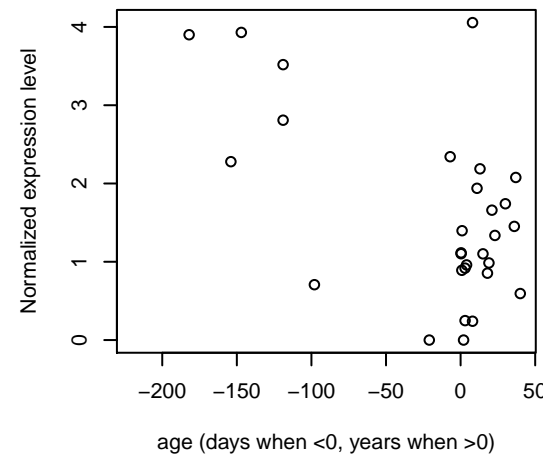

**CTH\_70889967\_70890099**  
(P=0.0406, Diff = 1.25)  
cerebellar cortex

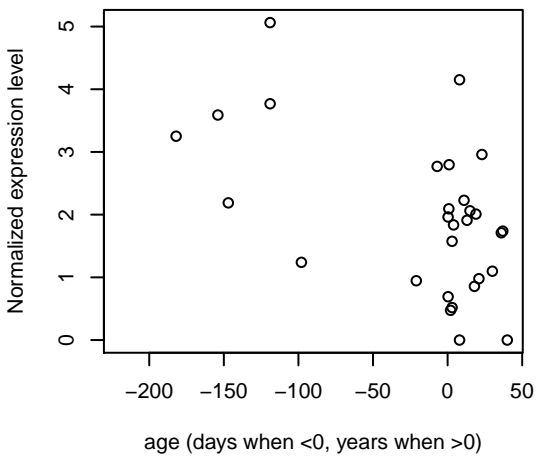

**CTH\_70895476\_70895534**  
(P=0.0754, Diff = 0.85)  
cerebellar cortex

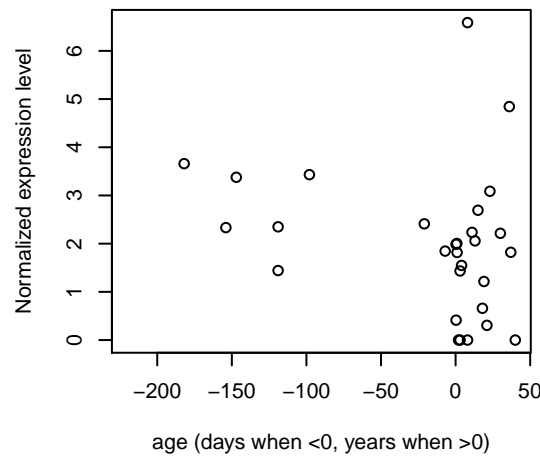

**CTH\_70895999\_70896077**  
(P=0.2694, Diff = 0.5)  
cerebellar cortex

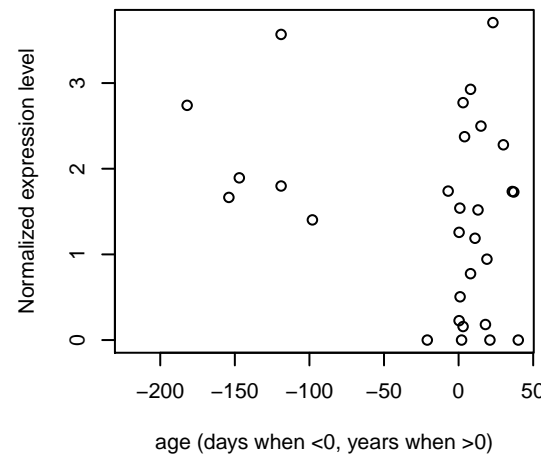

**CTH\_70897765\_70897918**  
(P=0.5172, Diff = 0.37)  
cerebellar cortex

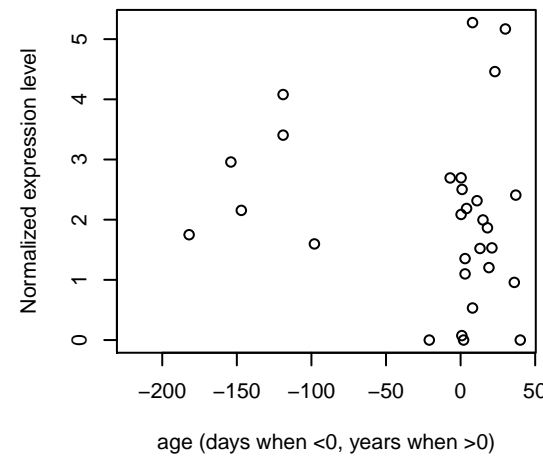

**CTH\_70899510\_70899632**  
(P=0.2265, Diff = 0.48)  
cerebellar cortex

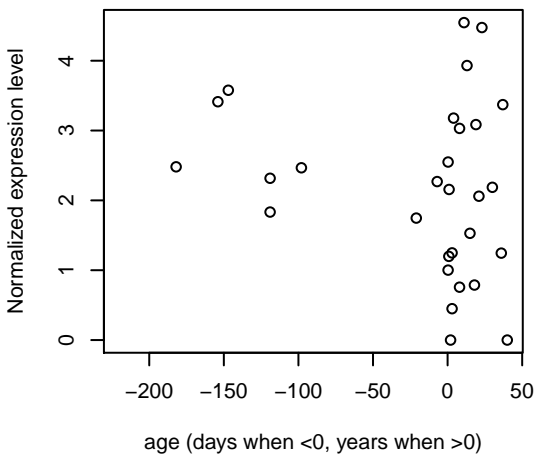

**CTH\_70900533\_70900860**  
(P=0.2909, Diff = 0.18)  
cerebellar cortex

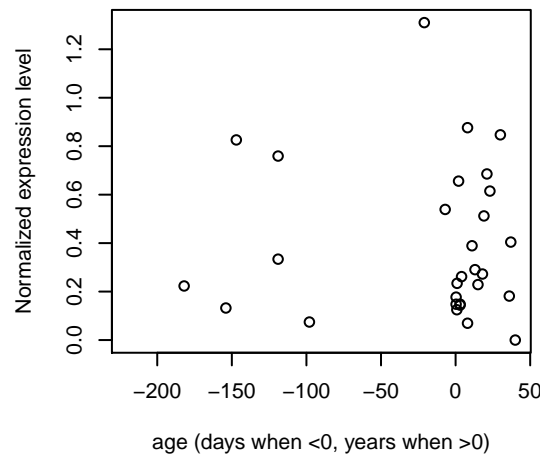

**CTH\_70904370\_70904509**  
(P=0.0647, Diff = 1.09)  
cerebellar cortex

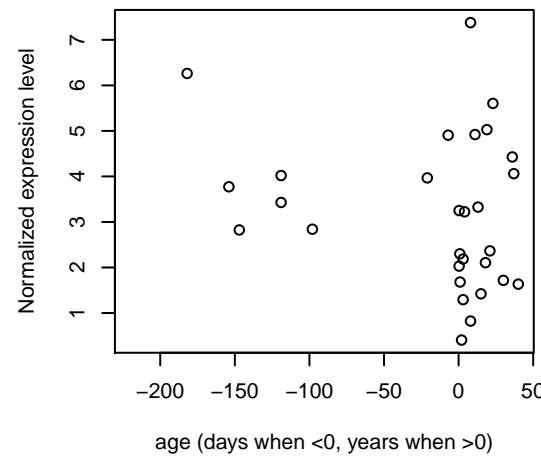

**CTH\_70904783\_70905534**  
(P=0.194, Diff = 0.34)  
cerebellar cortex

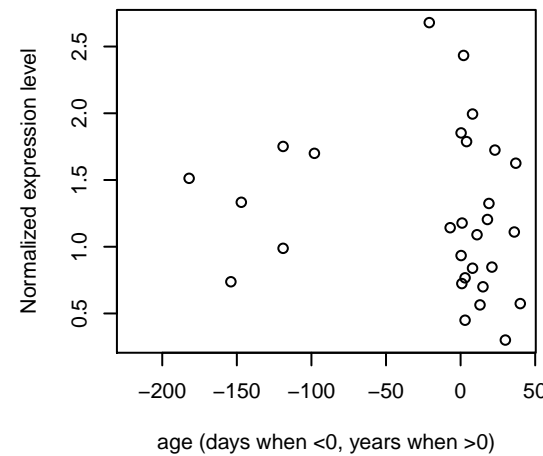

**SEC14L5\_5008317\_5008446**  
( $P=0.0082$ , Diff =  $-0.28$ )  
cerebellar cortex

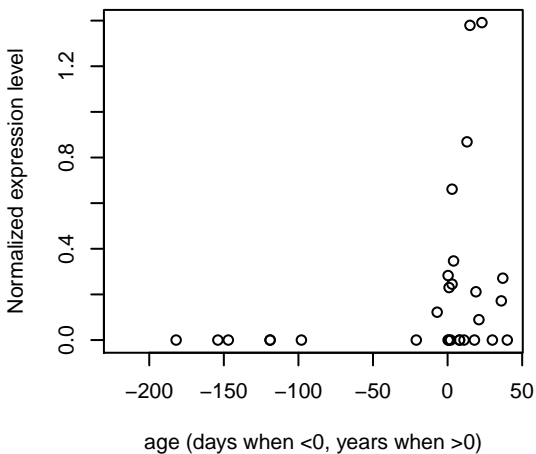

**SEC14L5\_5009273\_5009387**  
( $P=0.0012$ , Diff =  $-1.04$ )  
cerebellar cortex

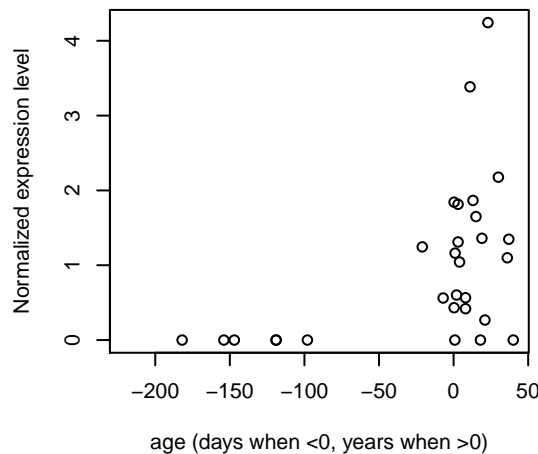

**SEC14L5\_5037557\_5037707**  
( $P=3e-04$ , Diff =  $-0.48$ )  
cerebellar cortex

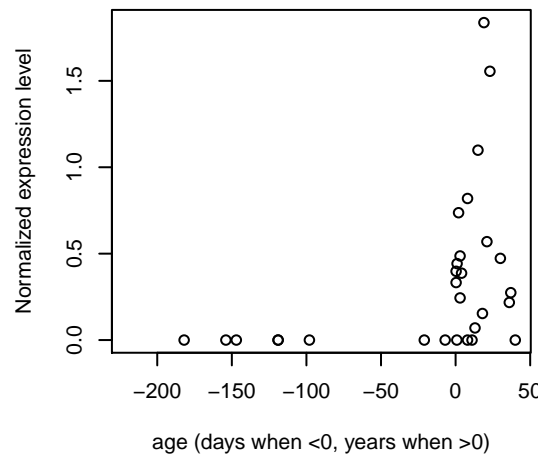

**SEC14L5\_5038149\_5038281**  
( $P=0.2864$ , Diff =  $-0.73$ )  
cerebellar cortex

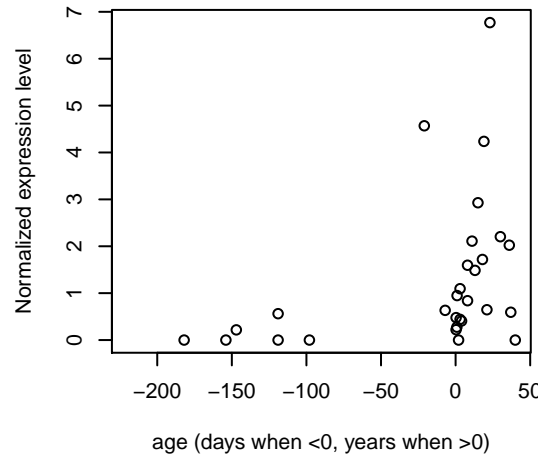

**SEC14L5\_5040767\_5040896**  
( $P=0.0037$ , Diff =  $-1.32$ )  
cerebellar cortex

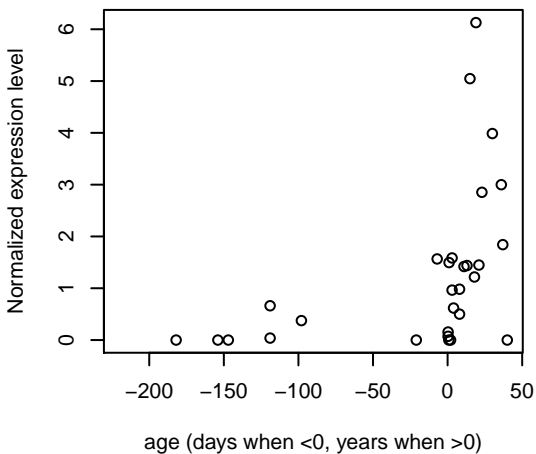

**SEC14L5\_5041838\_5042031**  
( $P=0.0184$ , Diff =  $-0.85$ )  
cerebellar cortex

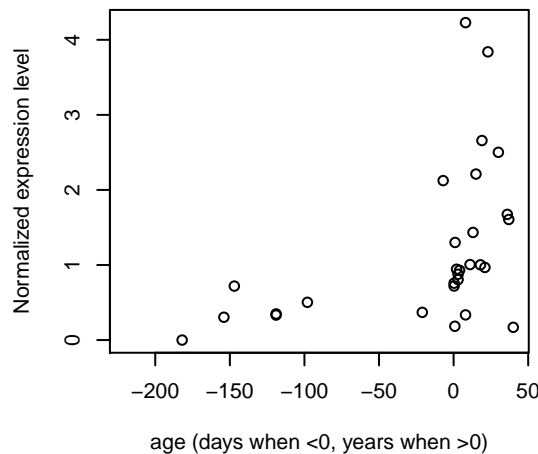

**SEC14L5\_5046348\_5046461**  
( $P=0.4005$ , Diff =  $-0.28$ )  
cerebellar cortex

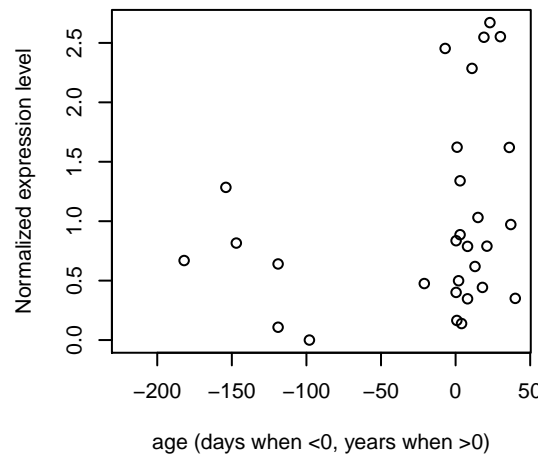

**SEC14L5\_5046855\_5047045**  
( $P=0.001$ , Diff =  $-1.21$ )  
cerebellar cortex

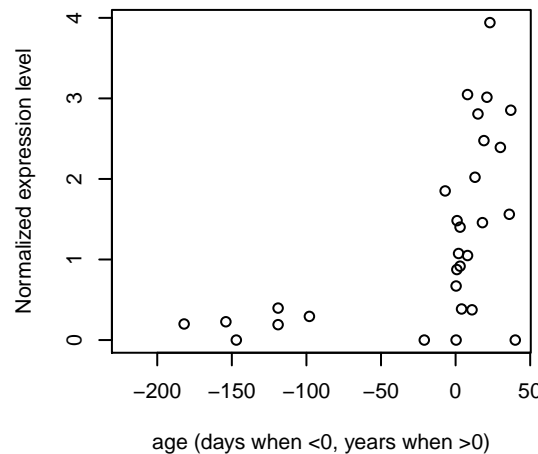

**SEC14L5\_5050655\_5050744**  
( $P=9e-04$ , Diff =  $-1.16$ )  
cerebellar cortex

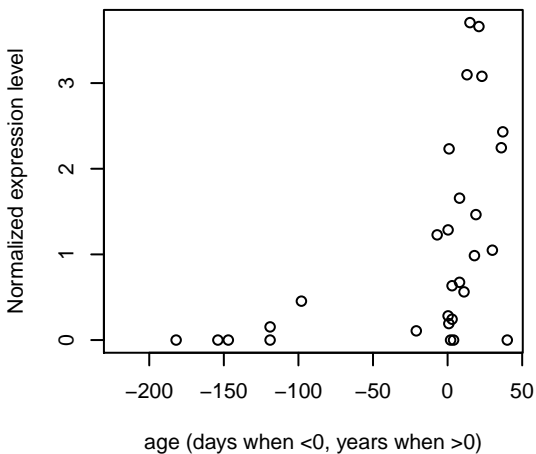

**SEC14L5\_5050855\_5050926**  
( $P=0.0082$ , Diff =  $-1.57$ )  
cerebellar cortex

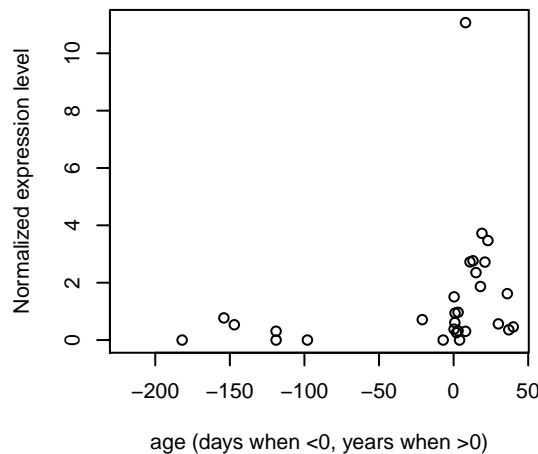

**SEC14L5\_5053402\_5053574**  
( $P=0.0207$ , Diff =  $-1.39$ )  
cerebellar cortex

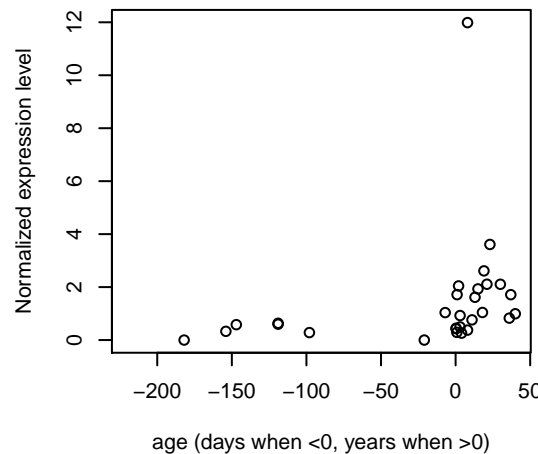

**SEC14L5\_5055914\_5056049**  
( $P=1e-04$ , Diff =  $-1.26$ )  
cerebellar cortex

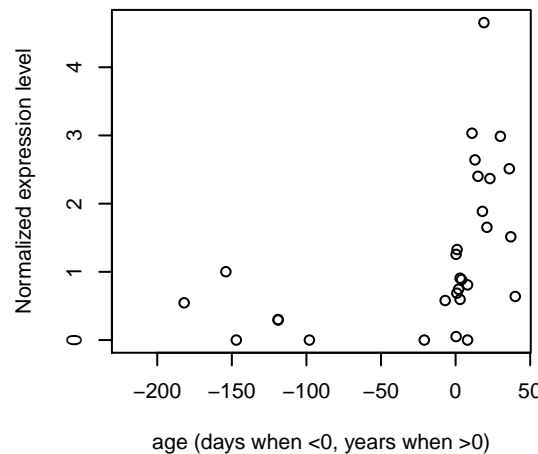

**SEC14L5\_5057352\_5057487**  
( $P=6e-04$ , Diff =  $-1.62$ )  
cerebellar cortex

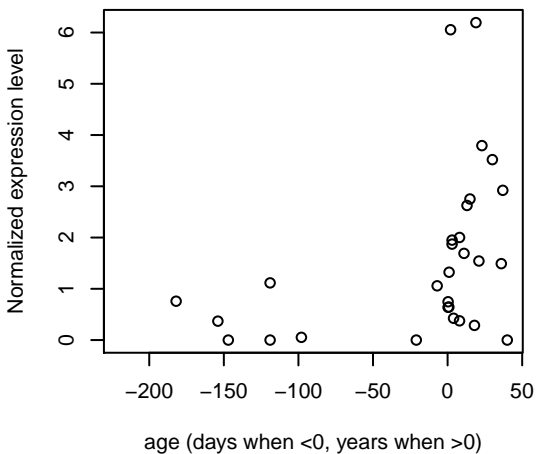

**SEC14L5\_5058421\_5058649**  
( $P=0.0014$ , Diff =  $-0.76$ )  
cerebellar cortex

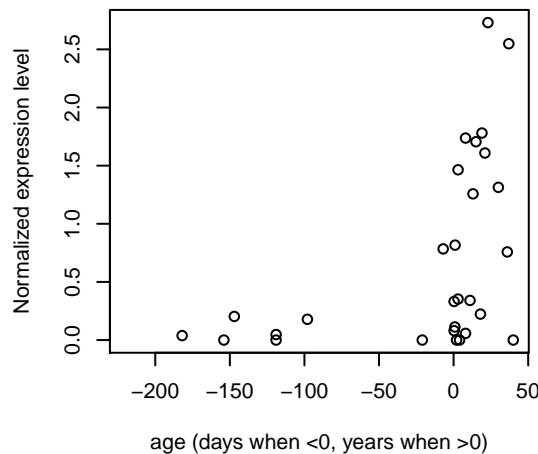

**SEC14L5\_5061095\_5061274**  
( $P=0.0016$ , Diff =  $-1$ )  
cerebellar cortex

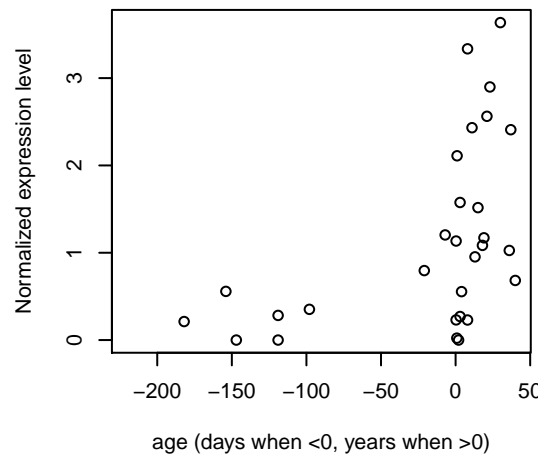

**SEC14L5\_5064859\_5069156**  
( $P=0$ , Diff =  $-1.97$ )  
cerebellar cortex

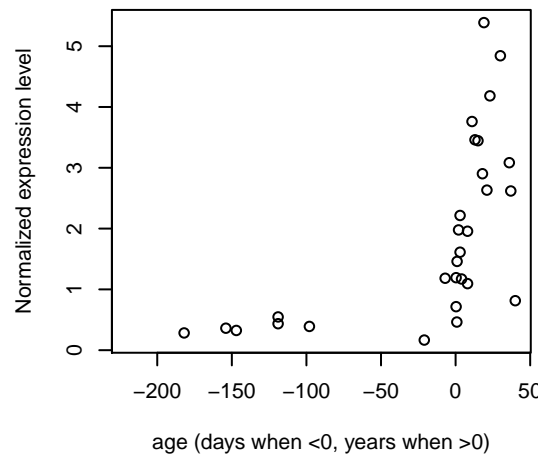



**RBFOX1\_6069094\_6069993**  
(P=0, Diff = -3.2)  
cerebellar cortex

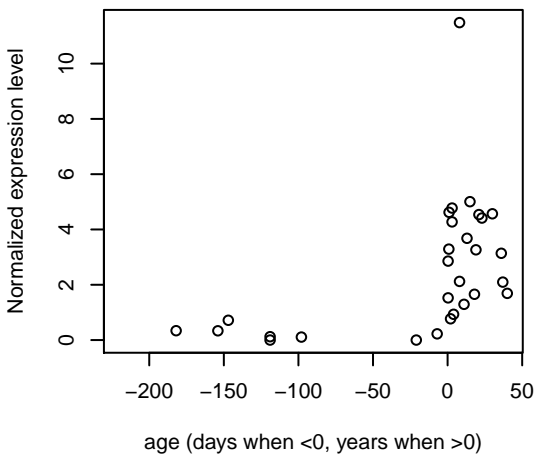

**RBFOX1\_6366995\_6367058**  
(P=0, Diff = -17.01)  
cerebellar cortex

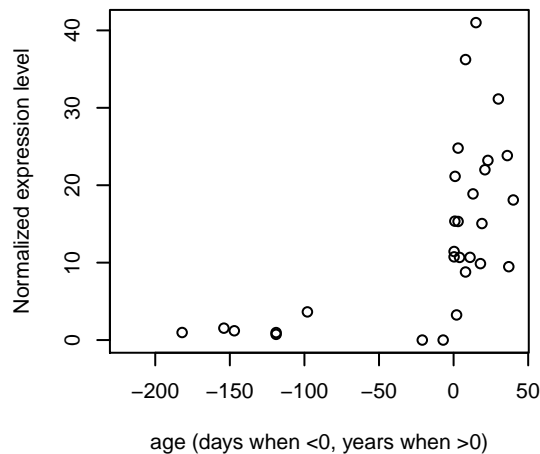

**RBFOX1\_6533179\_6533545**  
(P=0.0118, Diff = -0.91)  
cerebellar cortex

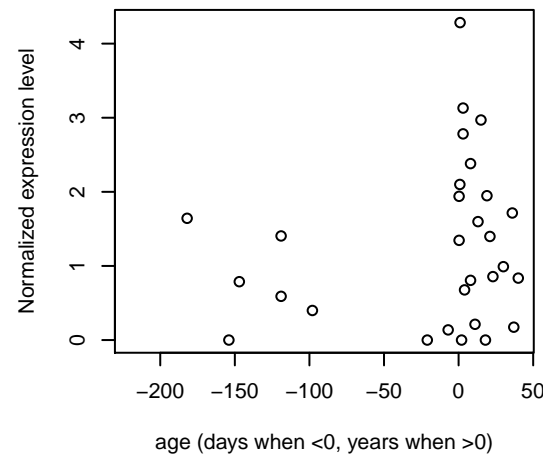

**RBFOX1\_6533793\_6533915**  
(P=0.2204, Diff = -1.16)  
cerebellar cortex

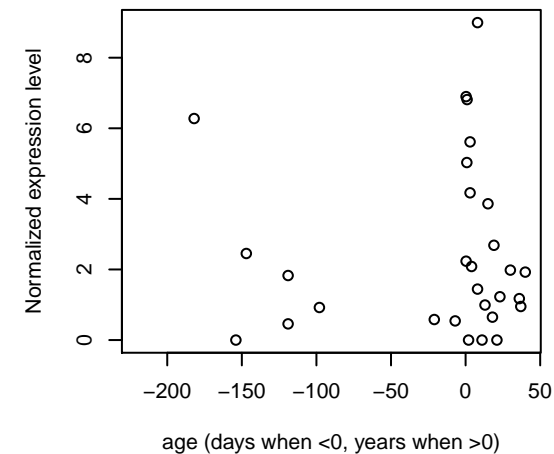

**RBFOX1\_6704603\_6704651**  
(P=0, Diff = -19.75)  
cerebellar cortex

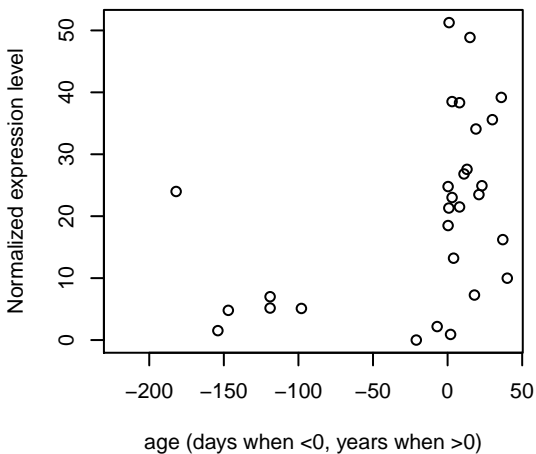

**RBFOX1\_6773751\_6773888**  
(P=0.0515, Diff = -0.23)  
cerebellar cortex

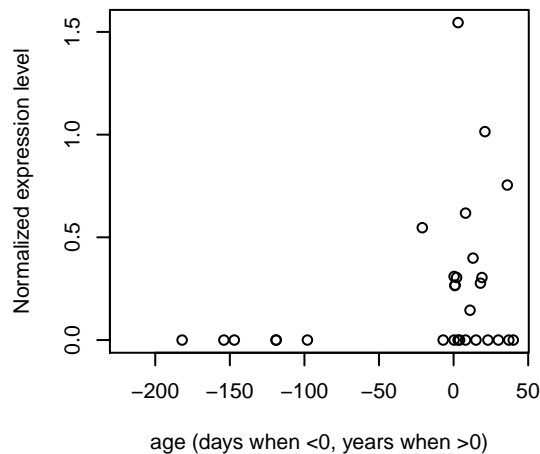

**RBFOX1\_6823809\_6824014**  
(P=0.4333, Diff = -0.32)  
cerebellar cortex

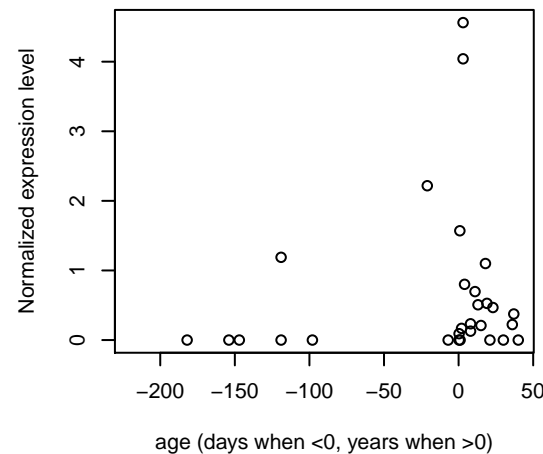

**RBFOX1\_7033639\_7033739**  
(P=0.1581, Diff = -0.1)  
cerebellar cortex

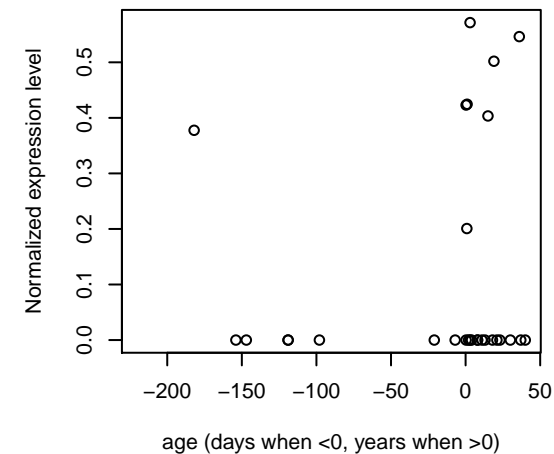

**RBFOX1\_7102057\_7102099**  
(P=0, Diff = -15.72)  
cerebellar cortex

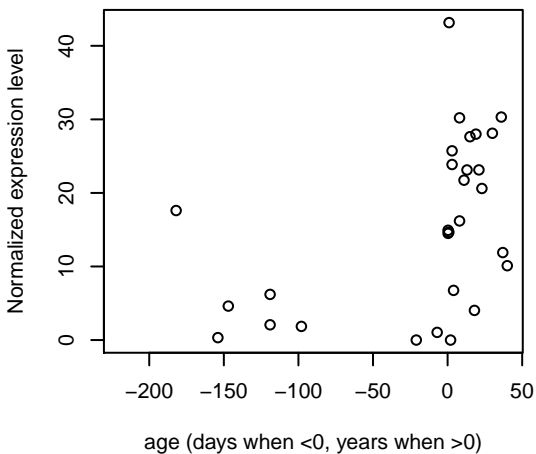

**RBFOX1\_7378648\_7378794**  
(P=0.0321, Diff = -0.41)  
cerebellar cortex

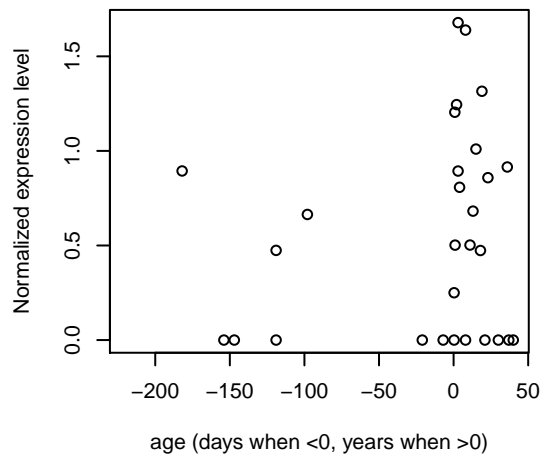

**RBFOX1\_7382750\_7383089**  
(P=0.1637, Diff = -0.01)  
cerebellar cortex

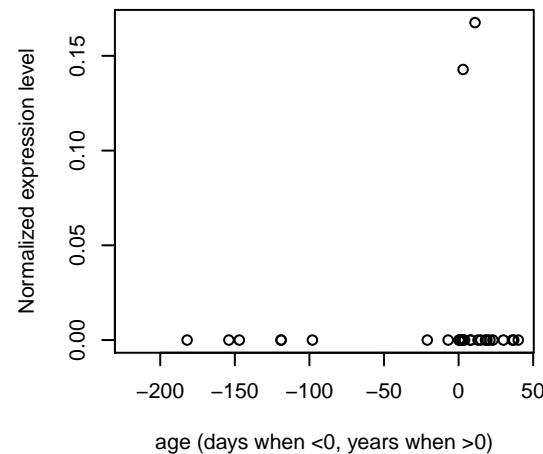

**RBFOX1\_7568148\_7568391**  
(P=7e-04, Diff = -18.56)  
cerebellar cortex

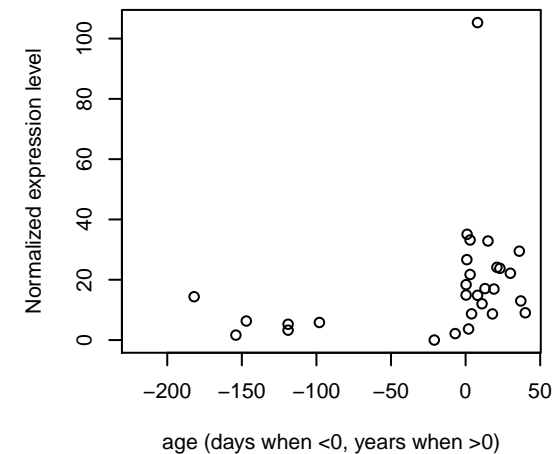

**RBFOX1\_7629778\_7629922**  
(P=0, Diff = -15.59)  
cerebellar cortex

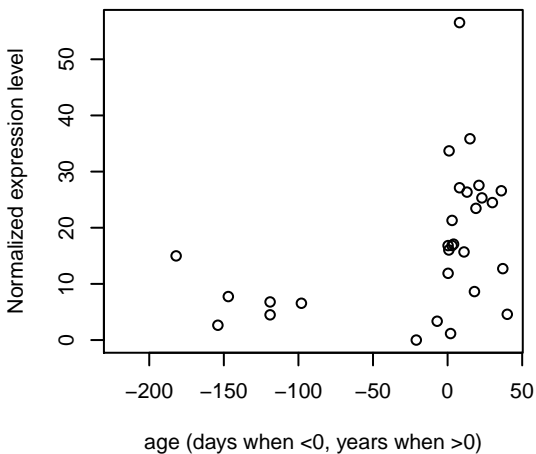

**RBFOX1\_7637248\_7637302**  
(P=0, Diff = -17.51)  
cerebellar cortex

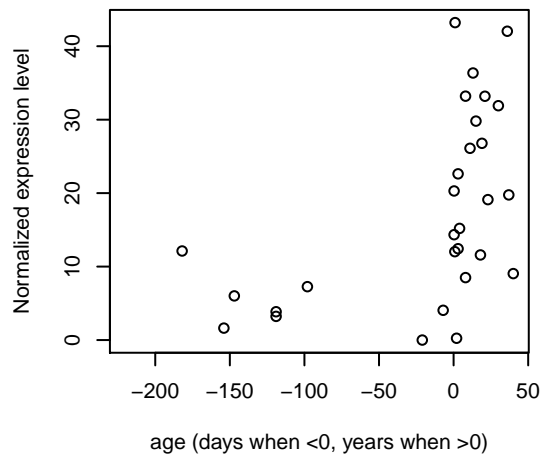

**RBFOX1\_7645550\_7645643**  
(P=0, Diff = -22.33)  
cerebellar cortex

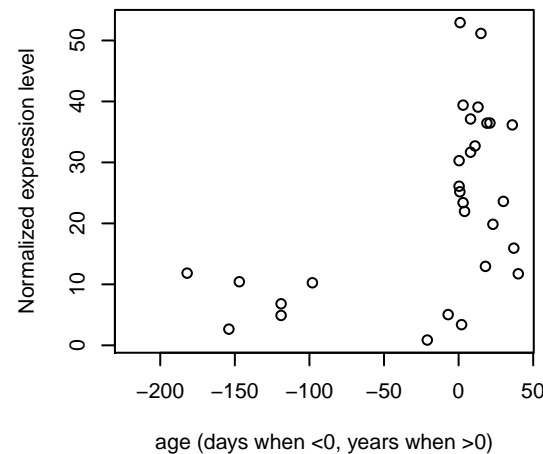

**RBFOX1\_7647372\_7647433**  
(P=0, Diff = -19.94)  
cerebellar cortex

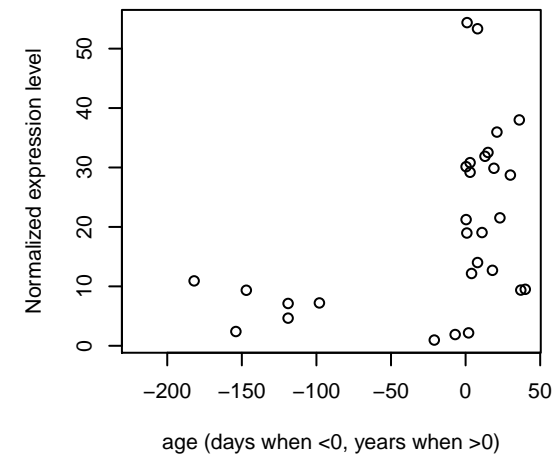

**RBFOX1\_7657286\_7657340**  
(P=0, Diff = -22.95)  
cerebellar cortex

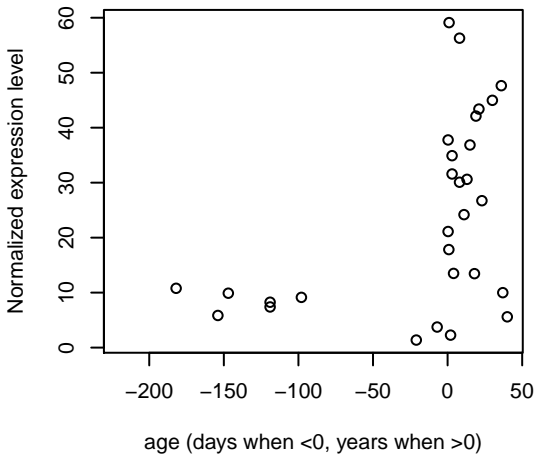

**RBFOX1\_7680604\_7680685**  
(P=0, Diff = -25.12)  
cerebellar cortex

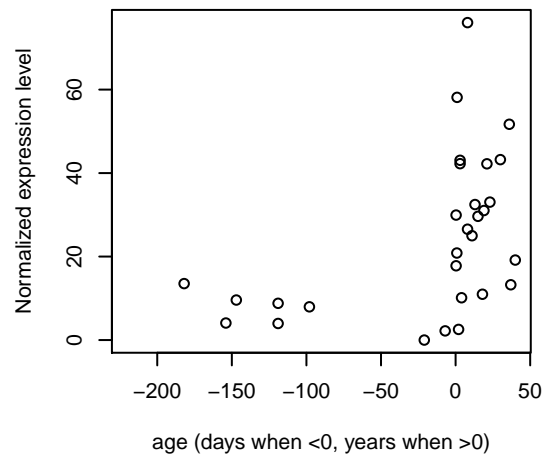

**RBFOX1\_7703816\_7703949**  
(P=0.0147, Diff = -11.65)  
cerebellar cortex

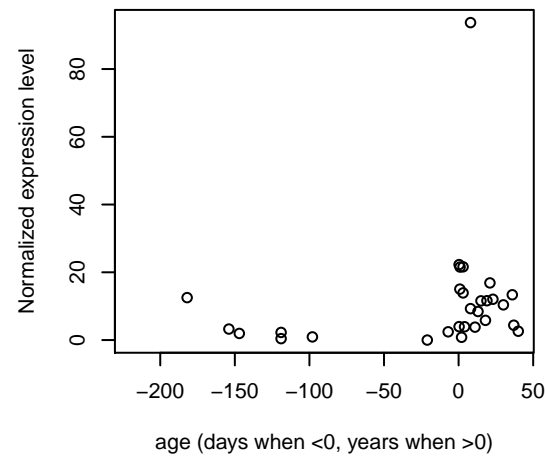

**RBFOX1\_7714930\_7714970**  
(P=0.0026, Diff = -15.84)  
cerebellar cortex

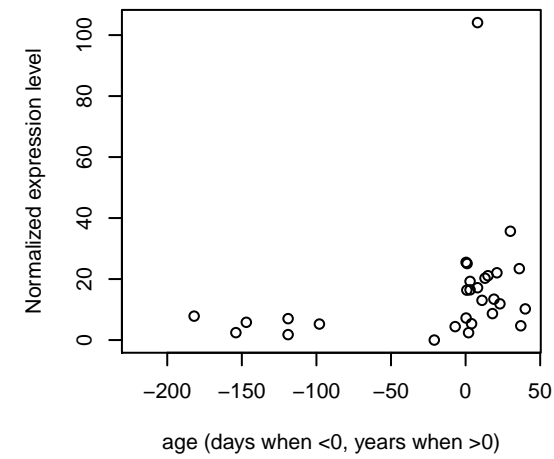

**RBFOX1\_7721558\_7721601**  
(P=0.4593, Diff = 0.28)  
cerebellar cortex

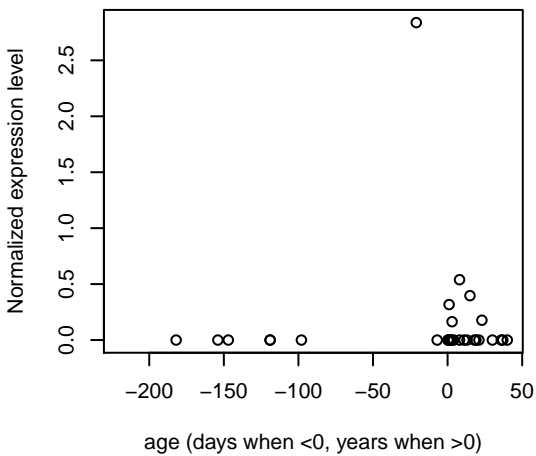

**RBFOX1\_7726775\_7726840**  
(P=0.0061, Diff = -22.36)  
cerebellar cortex

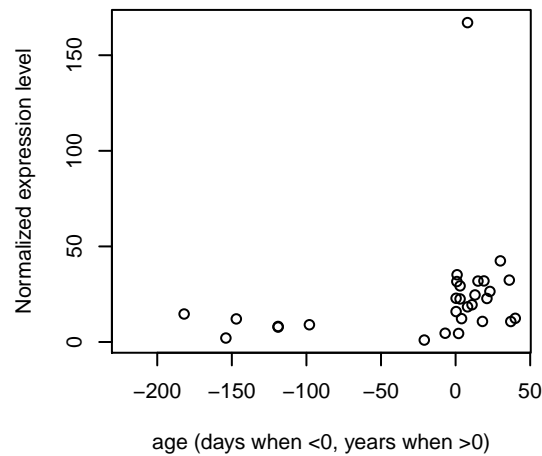

**RBFOX1\_7743316\_7743369**  
(P=0, Diff = -10.59)  
cerebellar cortex

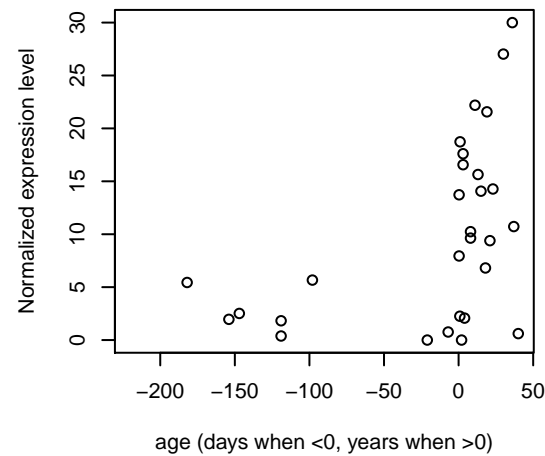

**RBFOX1\_7759057\_7759133**  
(P=0, Diff = -24.98)  
cerebellar cortex

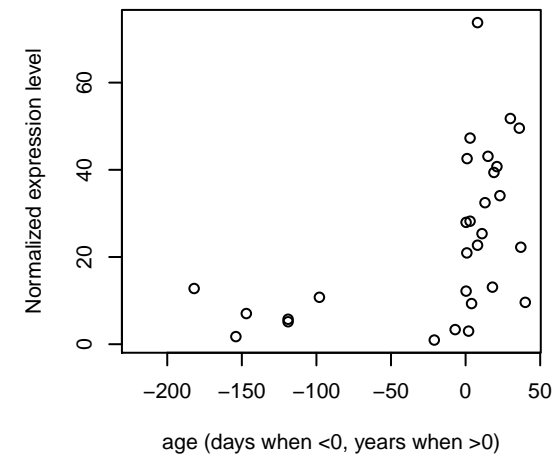

**RBFOX1\_7759495\_7763340**  
(P=0, Diff = -14.32)  
cerebellar cortex

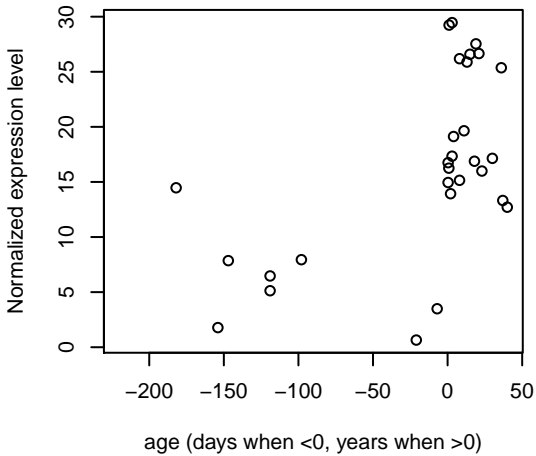

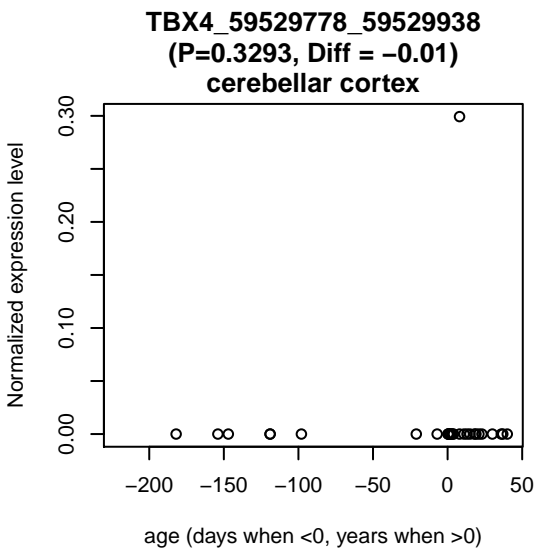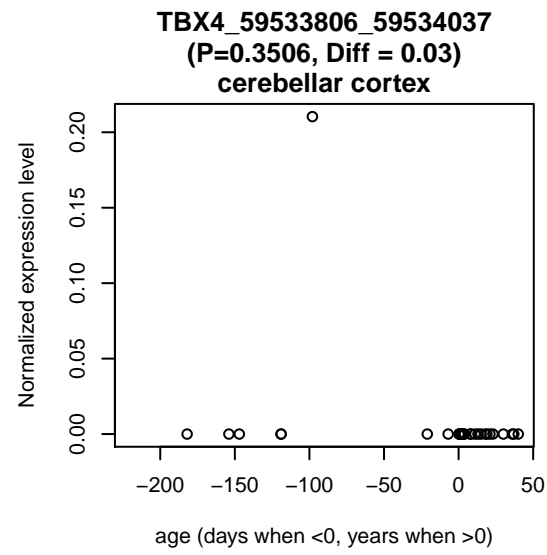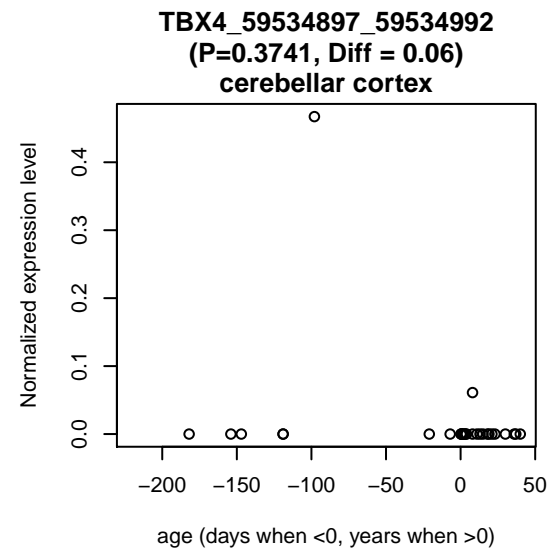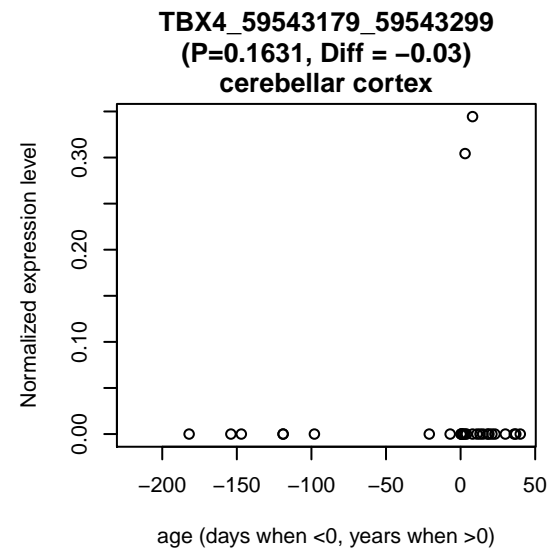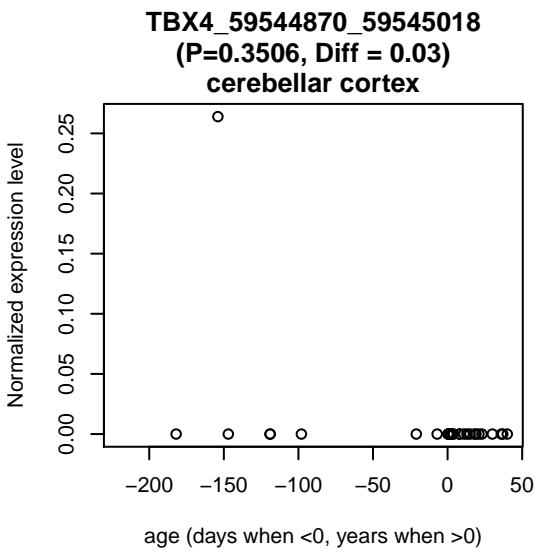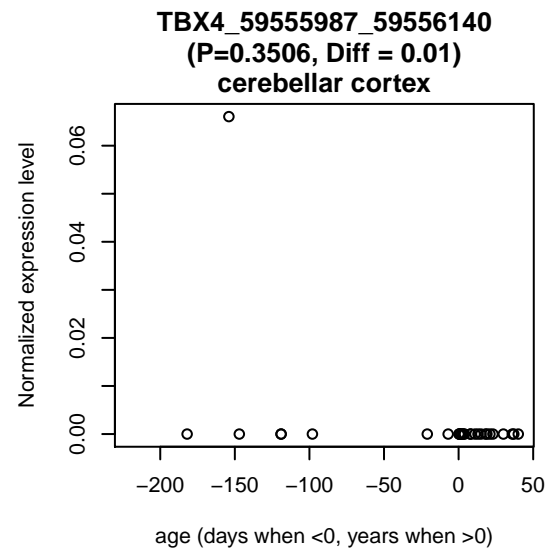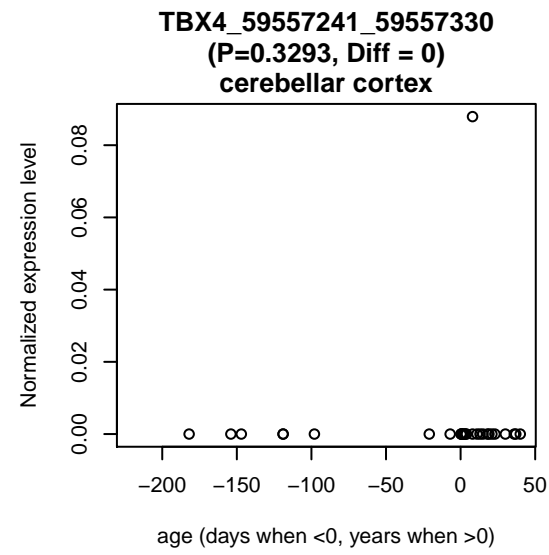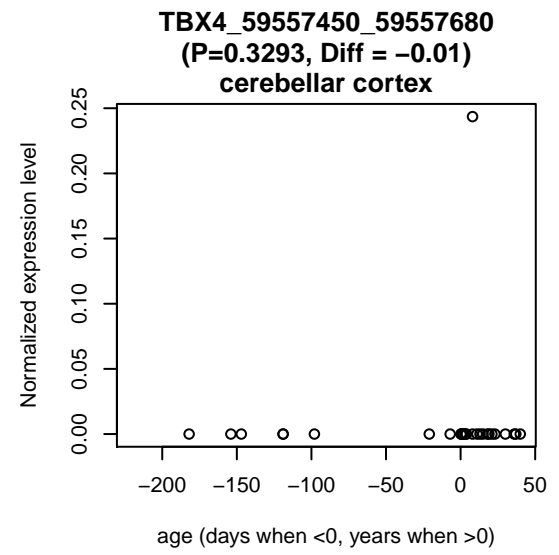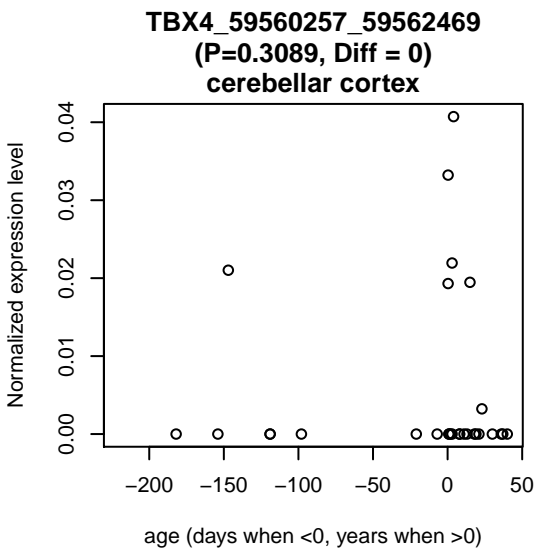

**FRG1\_190861942\_190862226**  
(P=0.3407, Diff = 1.33)  
cerebellar cortex

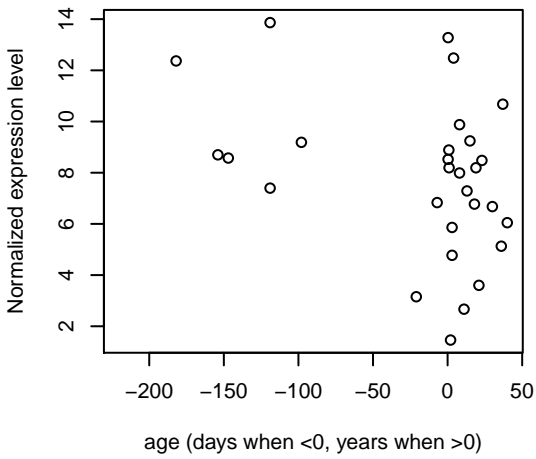

**FRG1\_190862987\_190863159**  
(P=0.9831, Diff = 0)  
cerebellar cortex

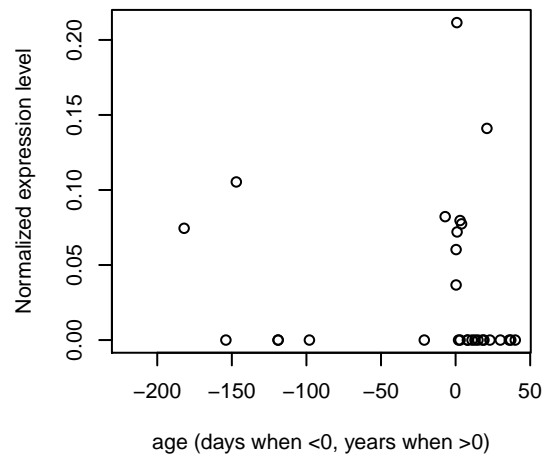

**FRG1\_190864356\_190864427**  
(P=0.1783, Diff = 3.93)  
cerebellar cortex

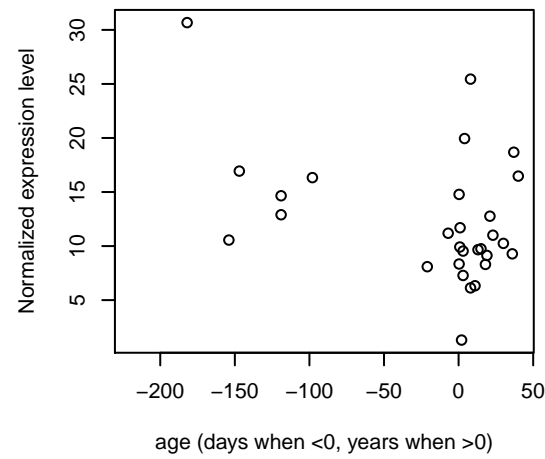

**FRG1\_190873316\_190873442**  
(P=0.2487, Diff = 7.98)  
cerebellar cortex

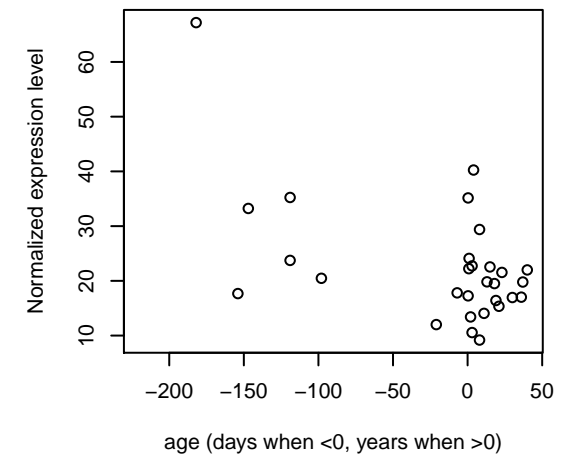

**FRG1\_190874222\_190874280**  
(P=0.0686, Diff = 4.15)  
cerebellar cortex

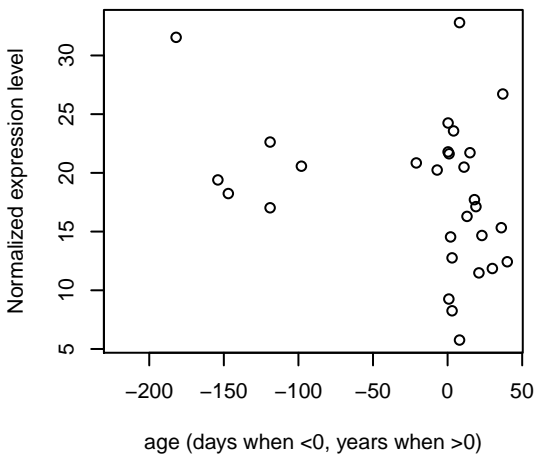

**FRG1\_190876191\_190876306**  
(P=0.1822, Diff = 4.2)  
cerebellar cortex

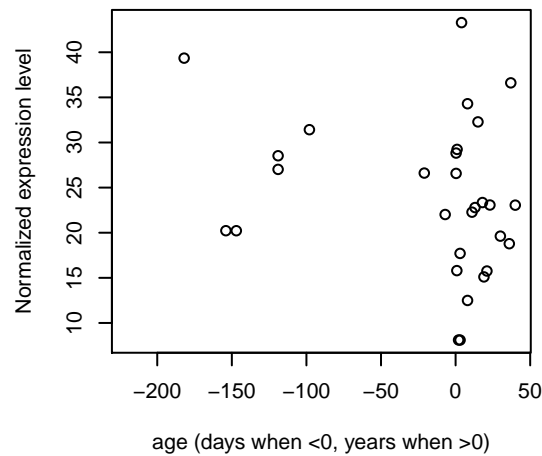

**FRG1\_190878552\_190878657**  
(P=0.6632, Diff = 1.02)  
cerebellar cortex

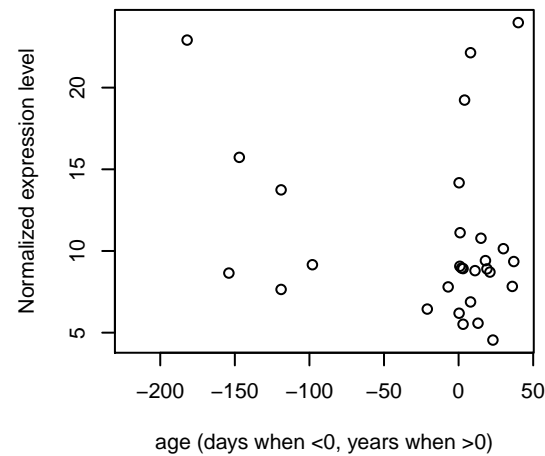

**FRG1\_190881902\_190881994**  
(P=0.8632, Diff = 0.41)  
cerebellar cortex

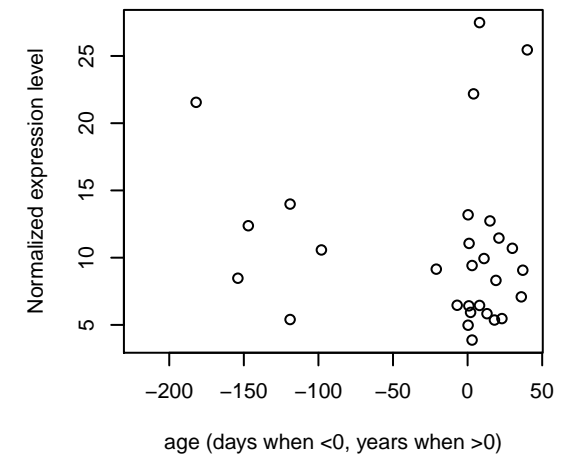

**FRG1\_190882016\_190882355**  
(P=0.6193, Diff = -0.1)  
cerebellar cortex

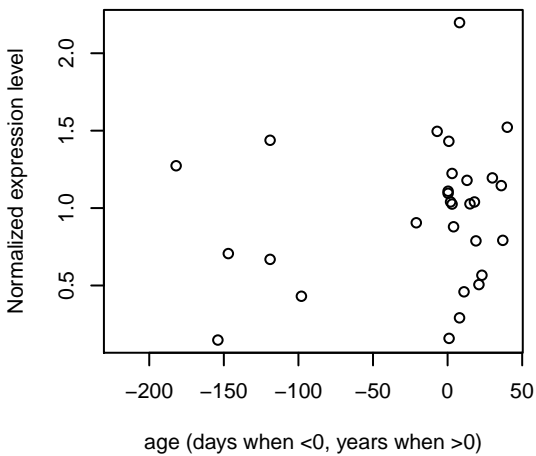

**FRG1\_190882583\_190882705**  
(P=0.2238, Diff = 0.39)  
cerebellar cortex

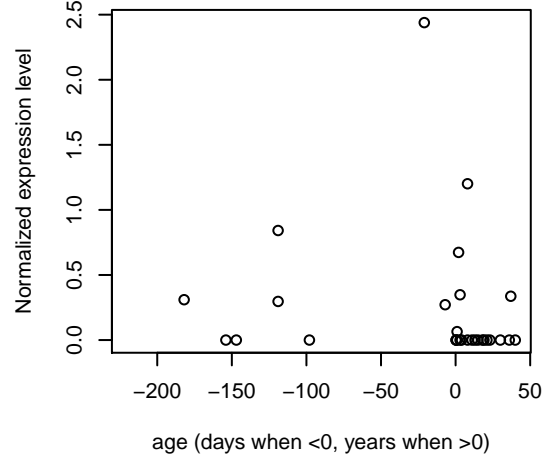

**FRG1\_190882976\_190883087**  
(P=0.7724, Diff = 2.53)  
cerebellar cortex

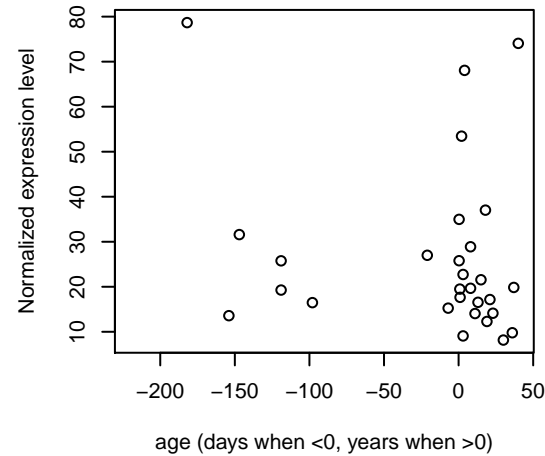

**FRG1\_190884247\_190884359**  
(P=0.7747, Diff = 1.23)  
cerebellar cortex

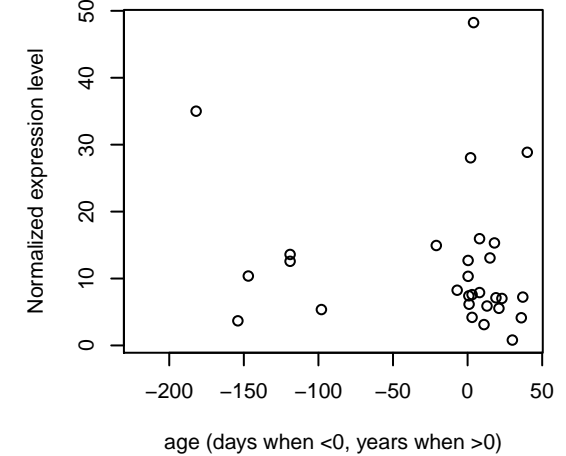

**METTL4\_2537523\_2539144**  
(P=0.3788, Diff = 0.24)  
cerebellar cortex

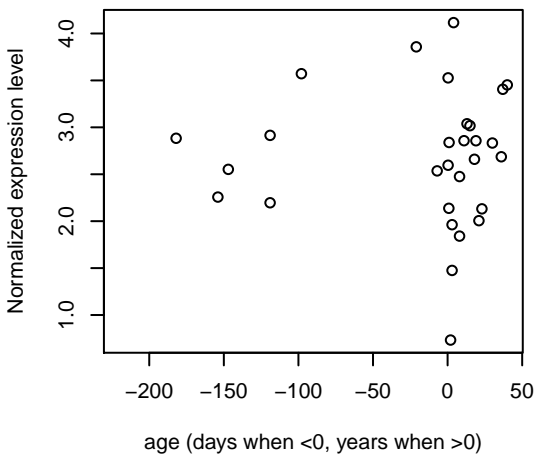

**METTL4\_2544193\_2544285**  
(P=0.2097, Diff = 0.6)  
cerebellar cortex

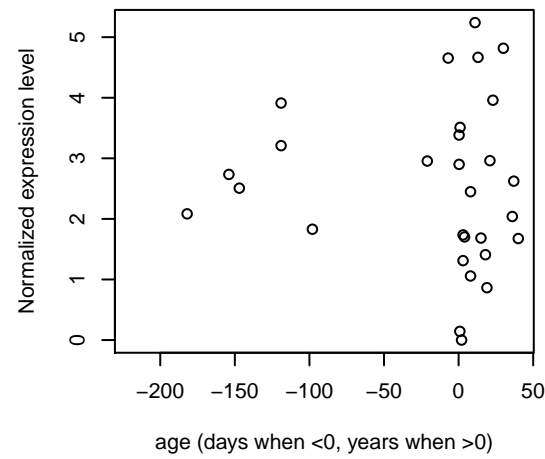

**METTL4\_2544651\_2544758**  
(P=0.6667, Diff = -0.25)  
cerebellar cortex

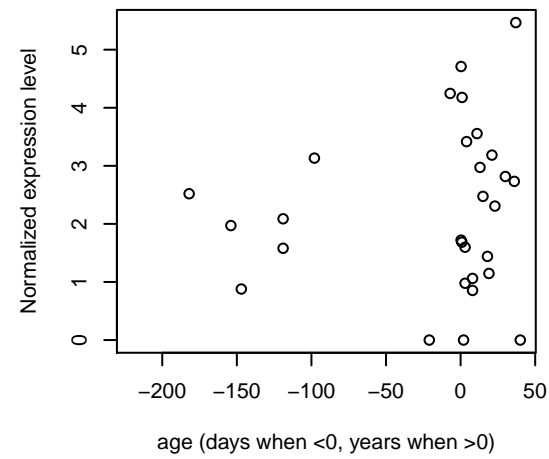

**METTL4\_2547353\_2547528**  
(P=0.5659, Diff = 0.25)  
cerebellar cortex

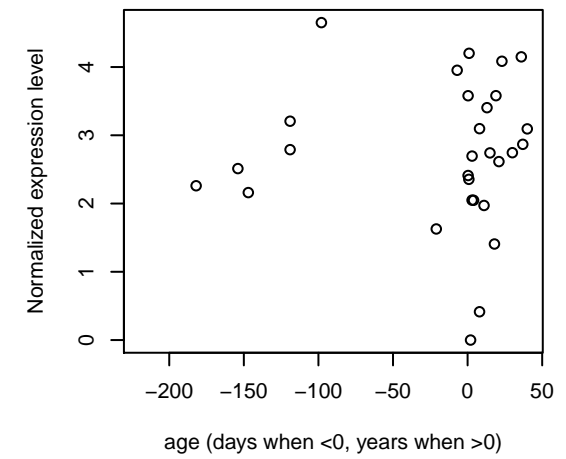

**METTL4\_2552693\_2552763**  
(P=0.2362, Diff = 0.61)  
cerebellar cortex

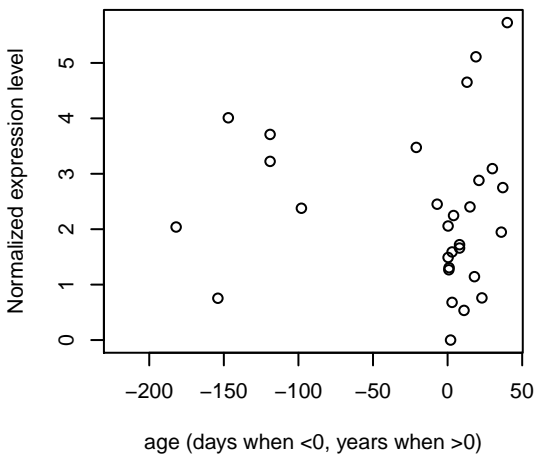

**METTL4\_2554667\_2555037**  
(P=0.8779, Diff = 0.1)  
cerebellar cortex

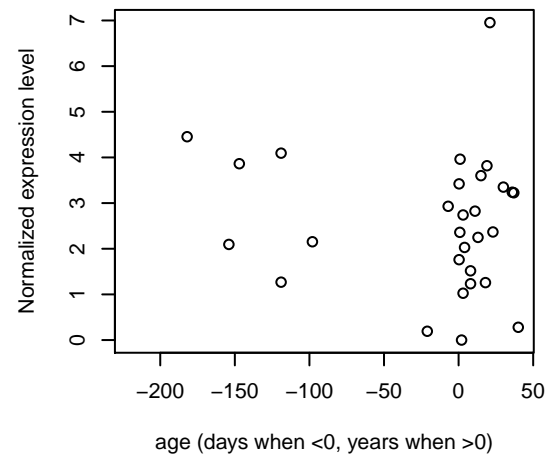

**METTL4\_2563795\_2563858**  
(P=0.8221, Diff = 0.16)  
cerebellar cortex

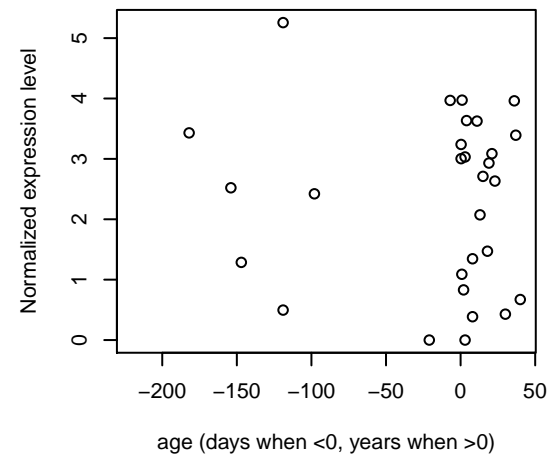

**METTL4\_2566819\_2567653**  
(P=0.2009, Diff = 0.46)  
cerebellar cortex

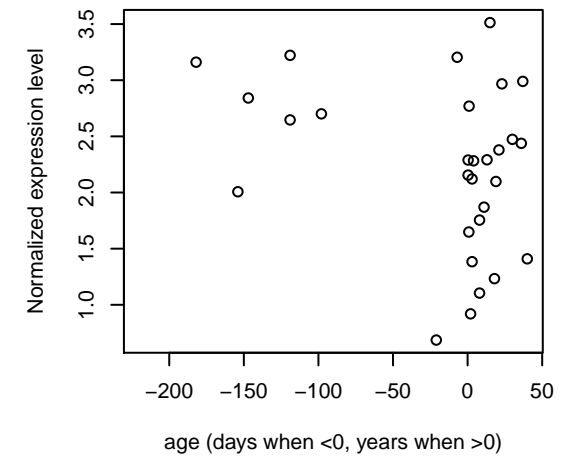

**METTL4\_2571147\_2571508**  
(P=0.8456, Diff = 0.05)  
cerebellar cortex

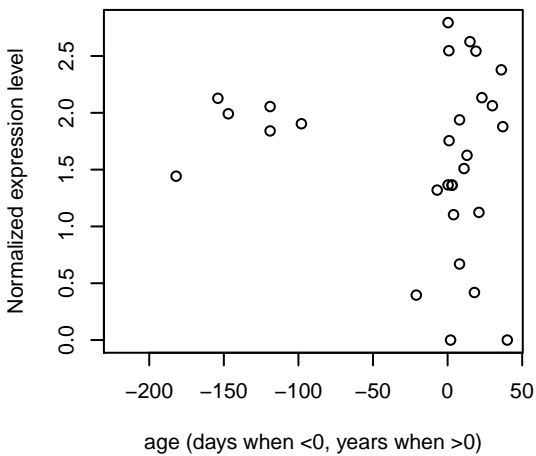

**C7orf11\_40172341\_40172858**  
(P=0.015, Diff = 7.78)  
cerebellar cortex

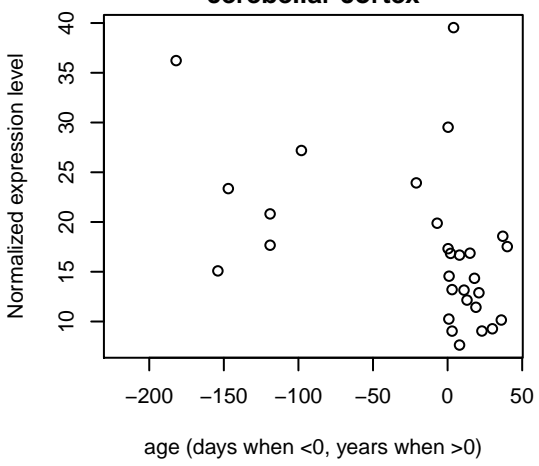

**C7orf11\_40173827\_40174258**  
(P=0.0883, Diff = 5.88)  
cerebellar cortex

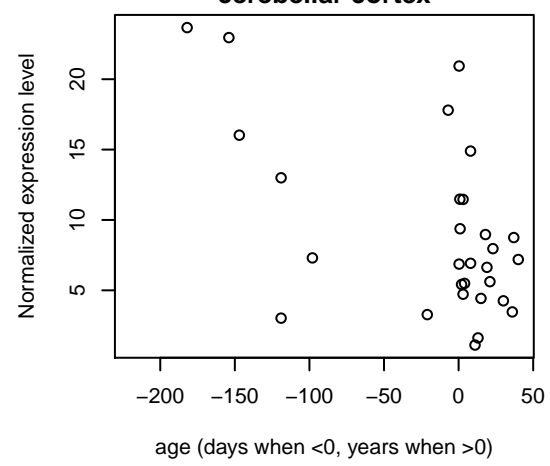

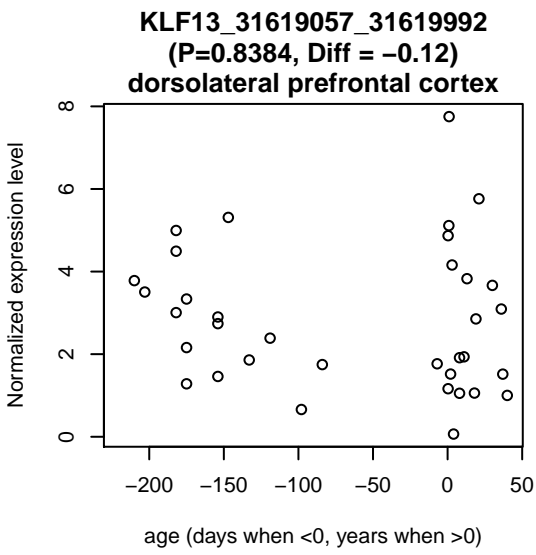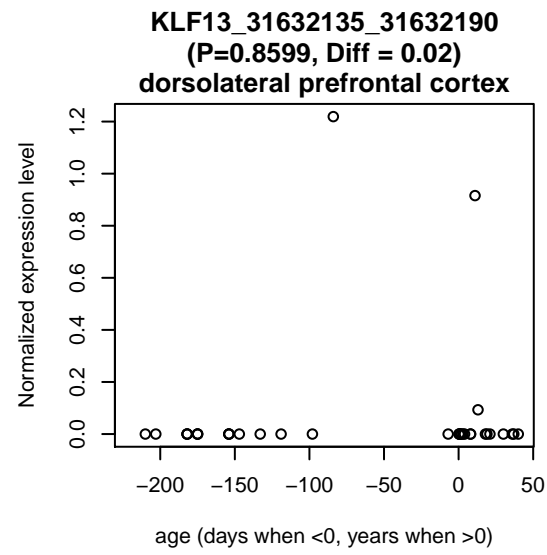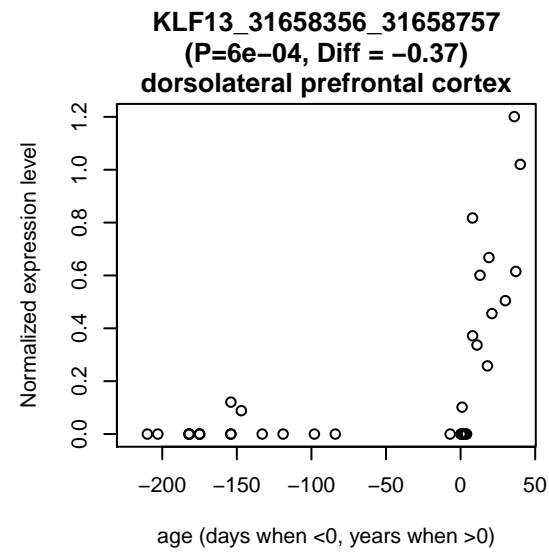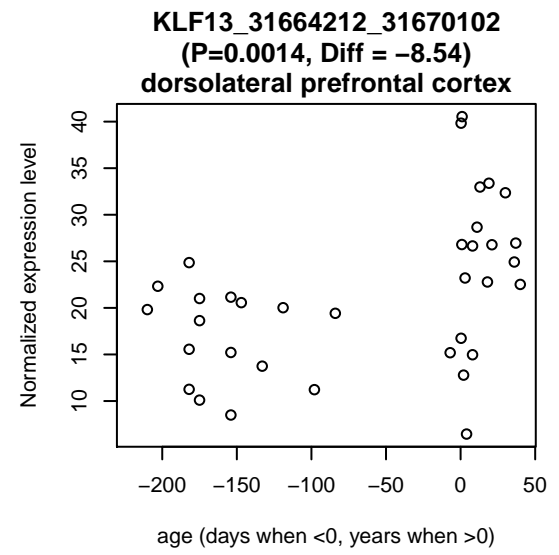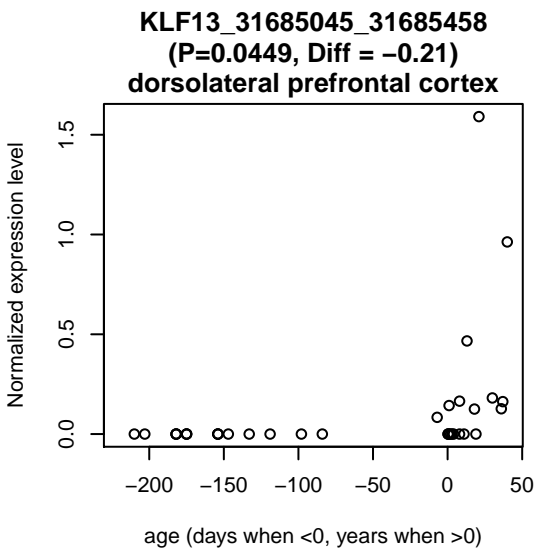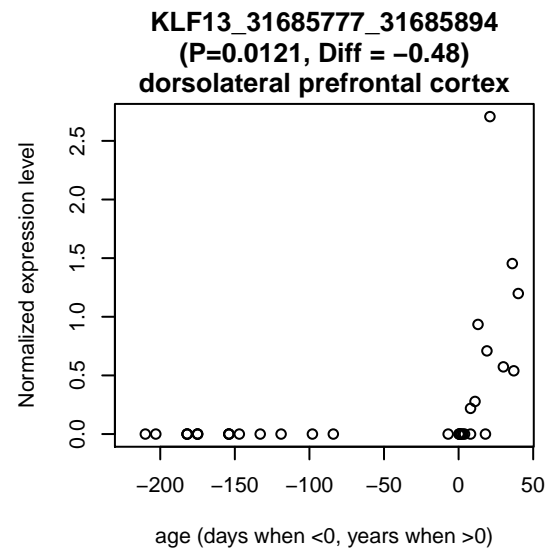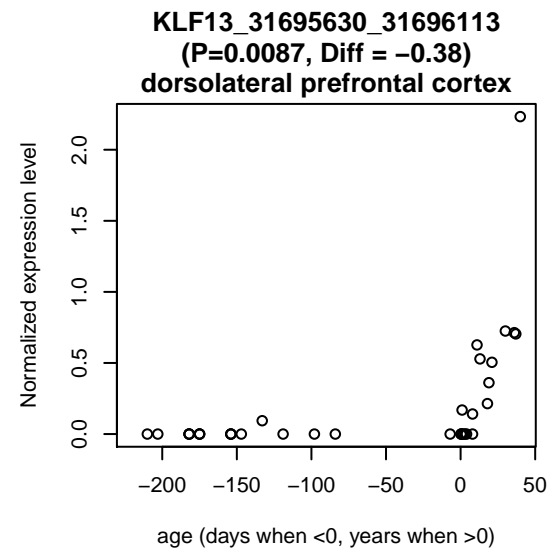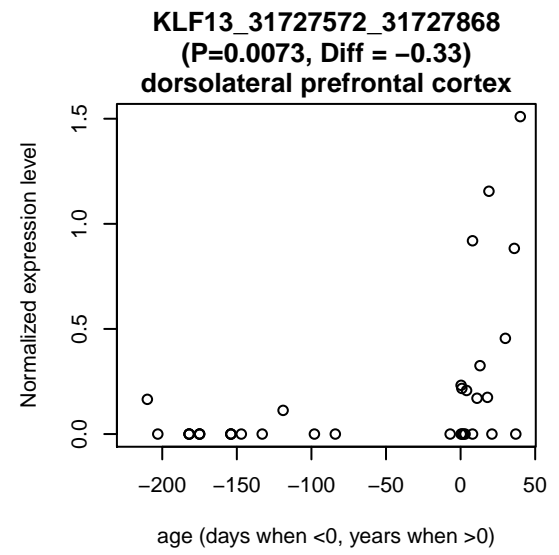

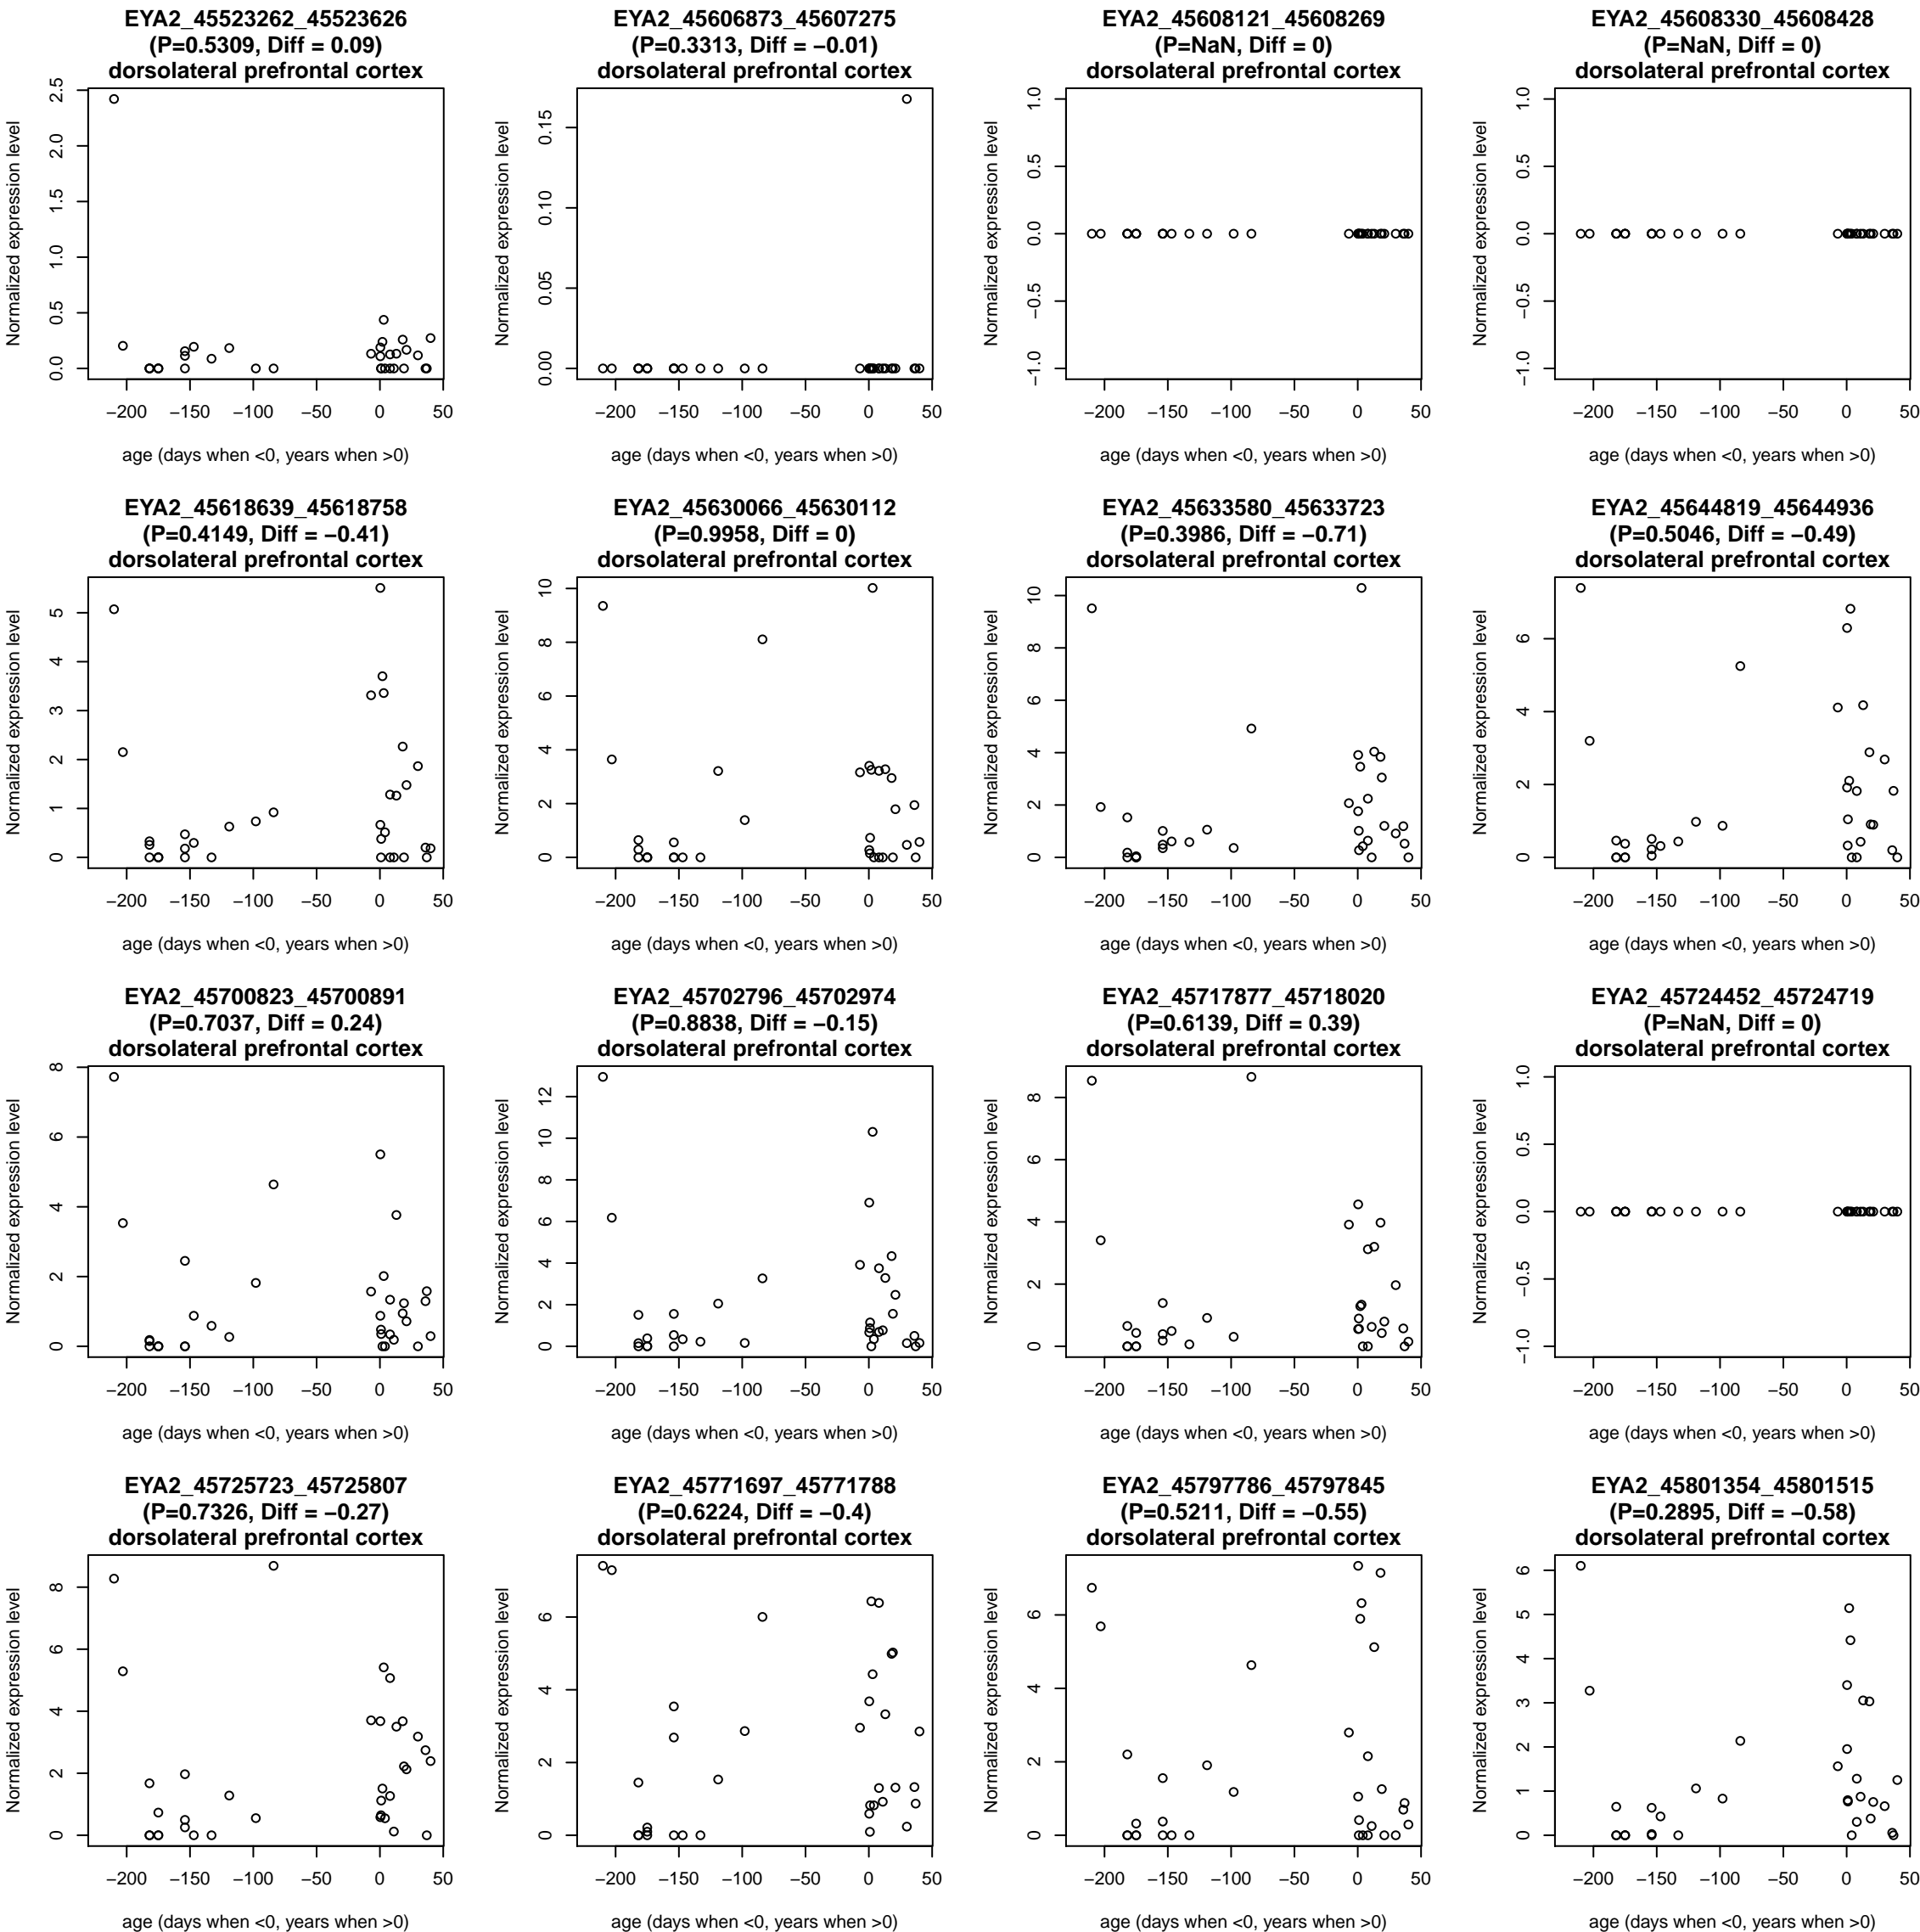



**EYA2\_45808445\_45808564**  
(P=0.6035, Diff = -0.48)  
dorsolateral prefrontal cortex

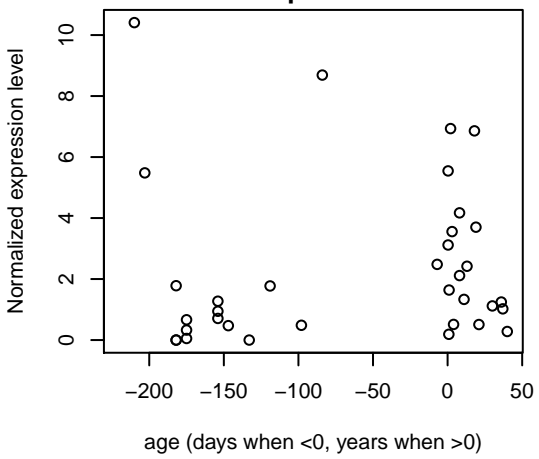

**EYA2\_45809462\_45809584**  
(P=0.0108, Diff = -2.36)  
dorsolateral prefrontal cortex

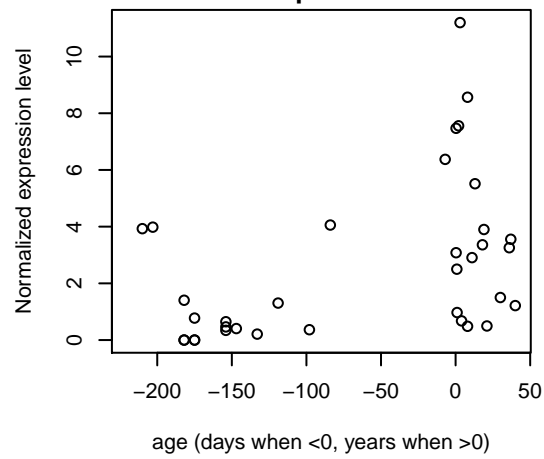

**EYA2\_45811938\_45812039**  
(P=0.1818, Diff = -2.05)  
dorsolateral prefrontal cortex

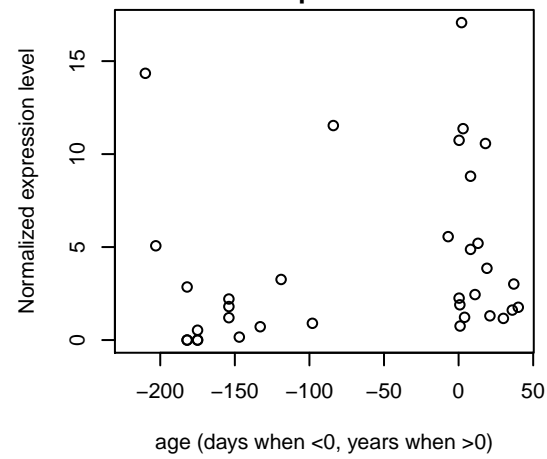

**EYA2\_45816700\_45817492**  
(P=0.1488, Diff = -2.05)  
dorsolateral prefrontal cortex

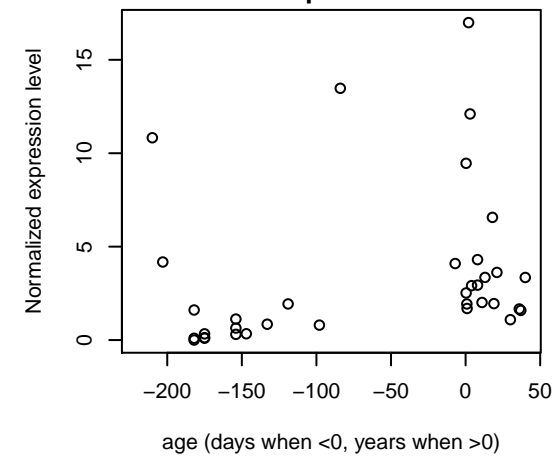

**LMCD1\_8543392\_8543666**  
(P=0.6161, Diff = -0.11)  
dorsolateral prefrontal cortex

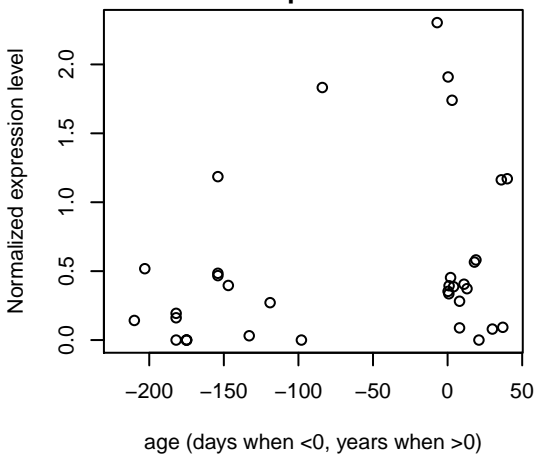

**LMCD1\_8556610\_8556681**  
(P=0.2672, Diff = -0.13)  
dorsolateral prefrontal cortex

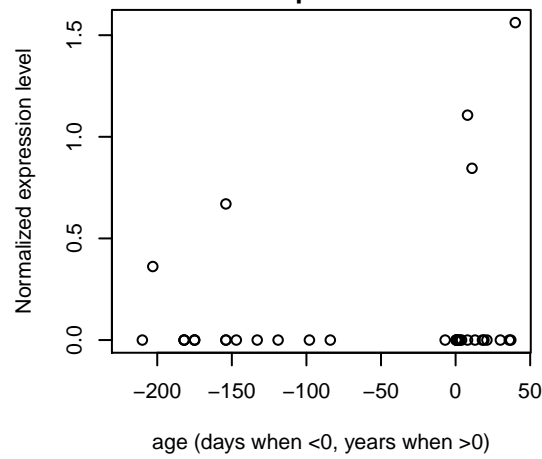

**LMCD1\_8574422\_8574511**  
(P=0.4013, Diff = -0.73)  
dorsolateral prefrontal cortex

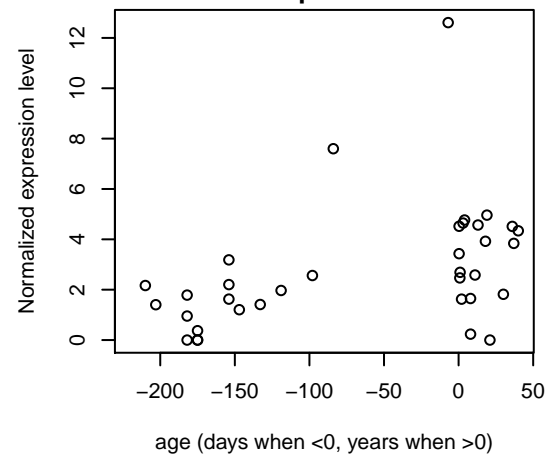

**LMCD1\_8578868\_8579204**  
(P=0.1707, Diff = -0.92)  
dorsolateral prefrontal cortex

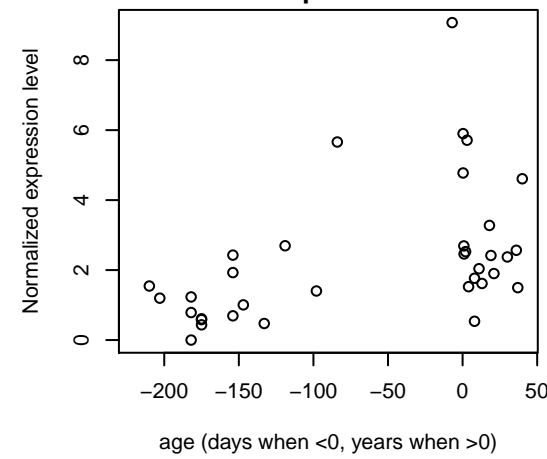

**LMCD1\_8590253\_8590589**  
(P=0.1389, Diff = -0.76)  
dorsolateral prefrontal cortex

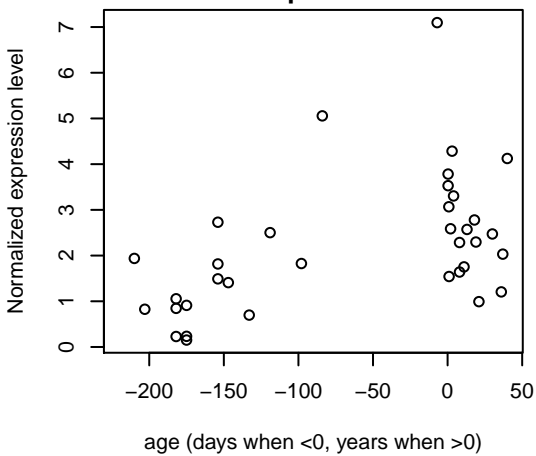

**LMCD1\_8591559\_8592135**  
(P=0.1621, Diff = -0.06)  
dorsolateral prefrontal cortex

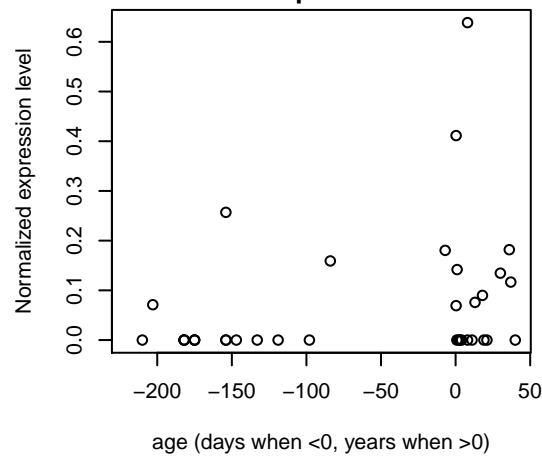

**LMCD1\_8607117\_8607333**  
(P=0.0617, Diff = -0.83)  
dorsolateral prefrontal cortex

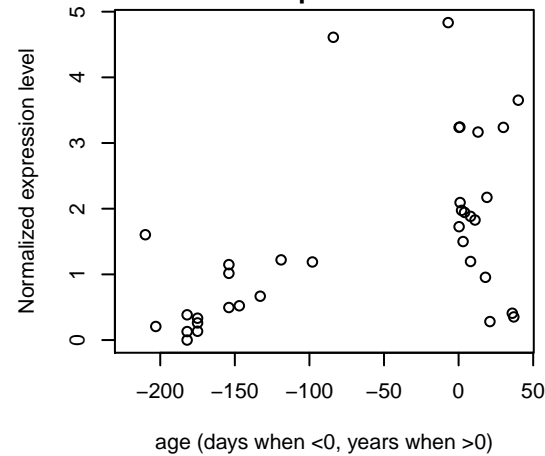

**LMCD1\_8609125\_8609805**  
(P=0.0647, Diff = -1.47)  
dorsolateral prefrontal cortex

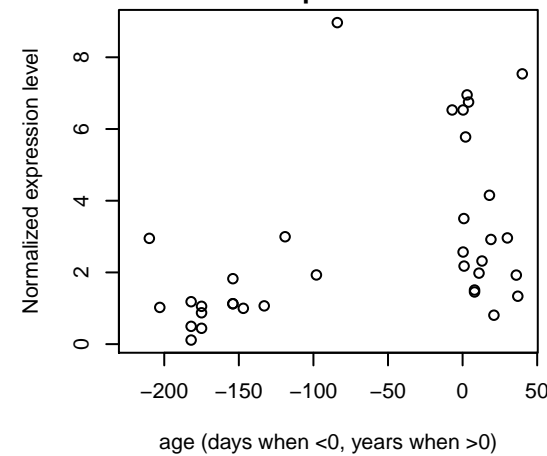

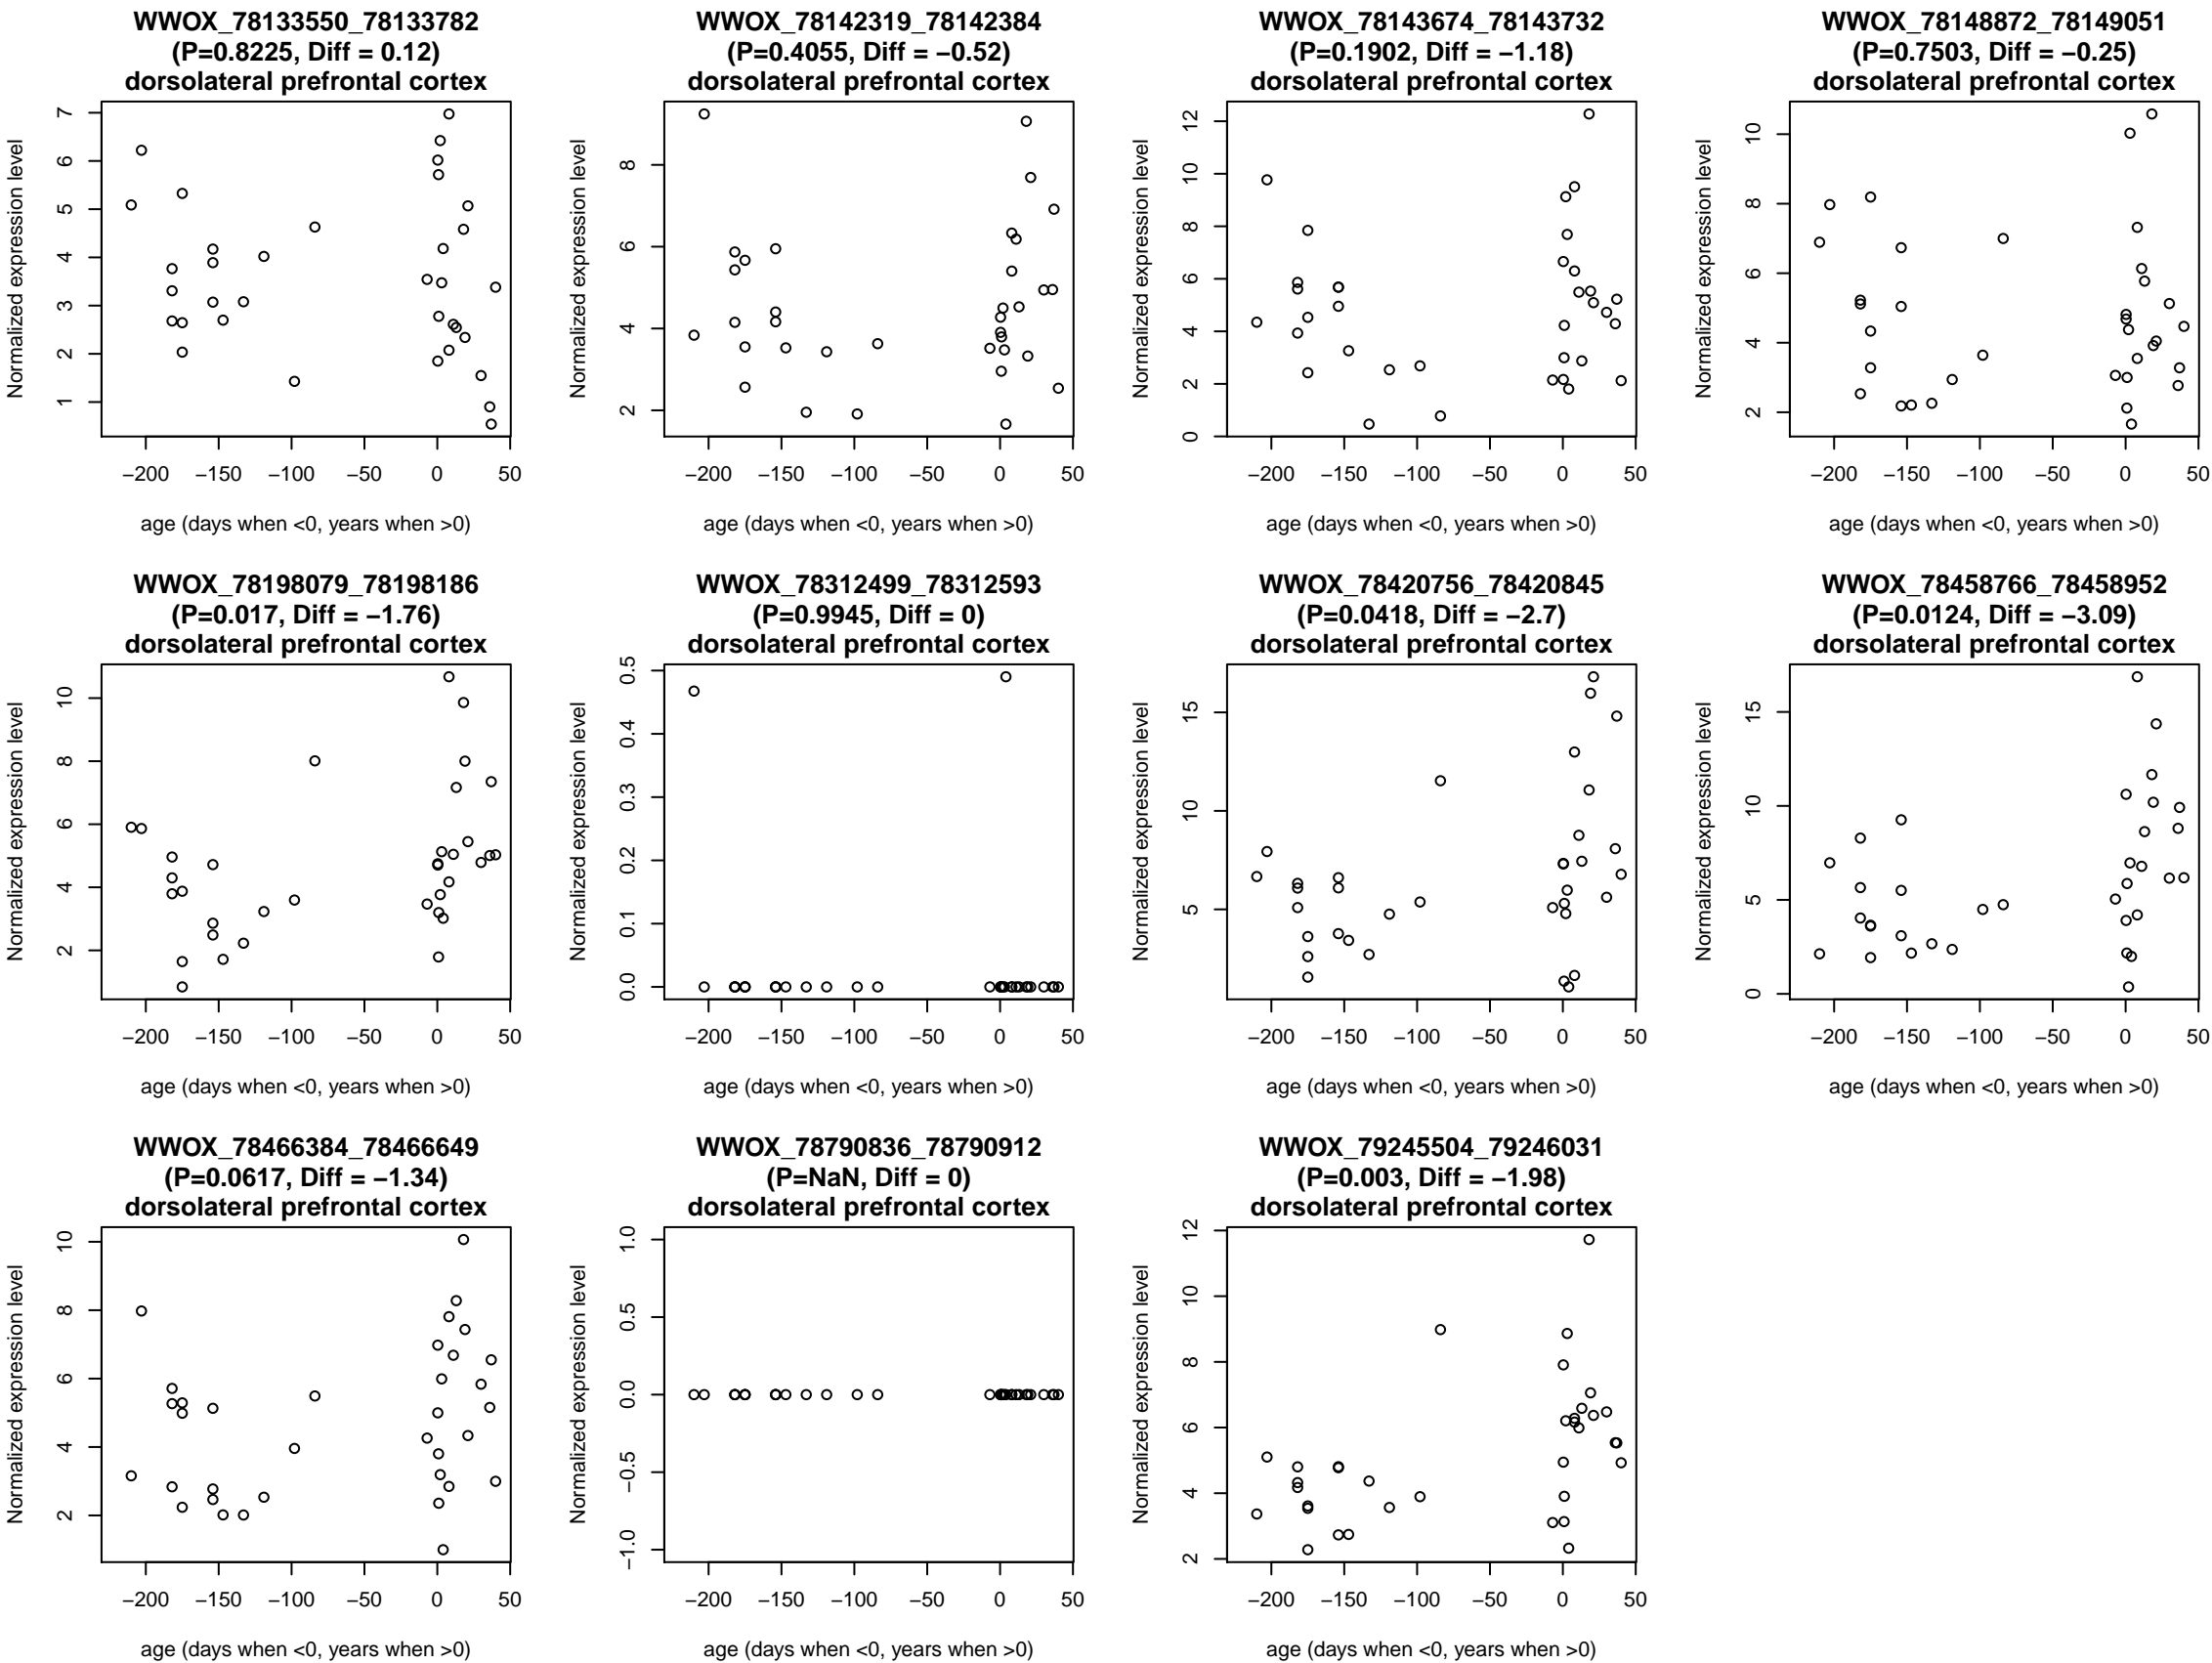

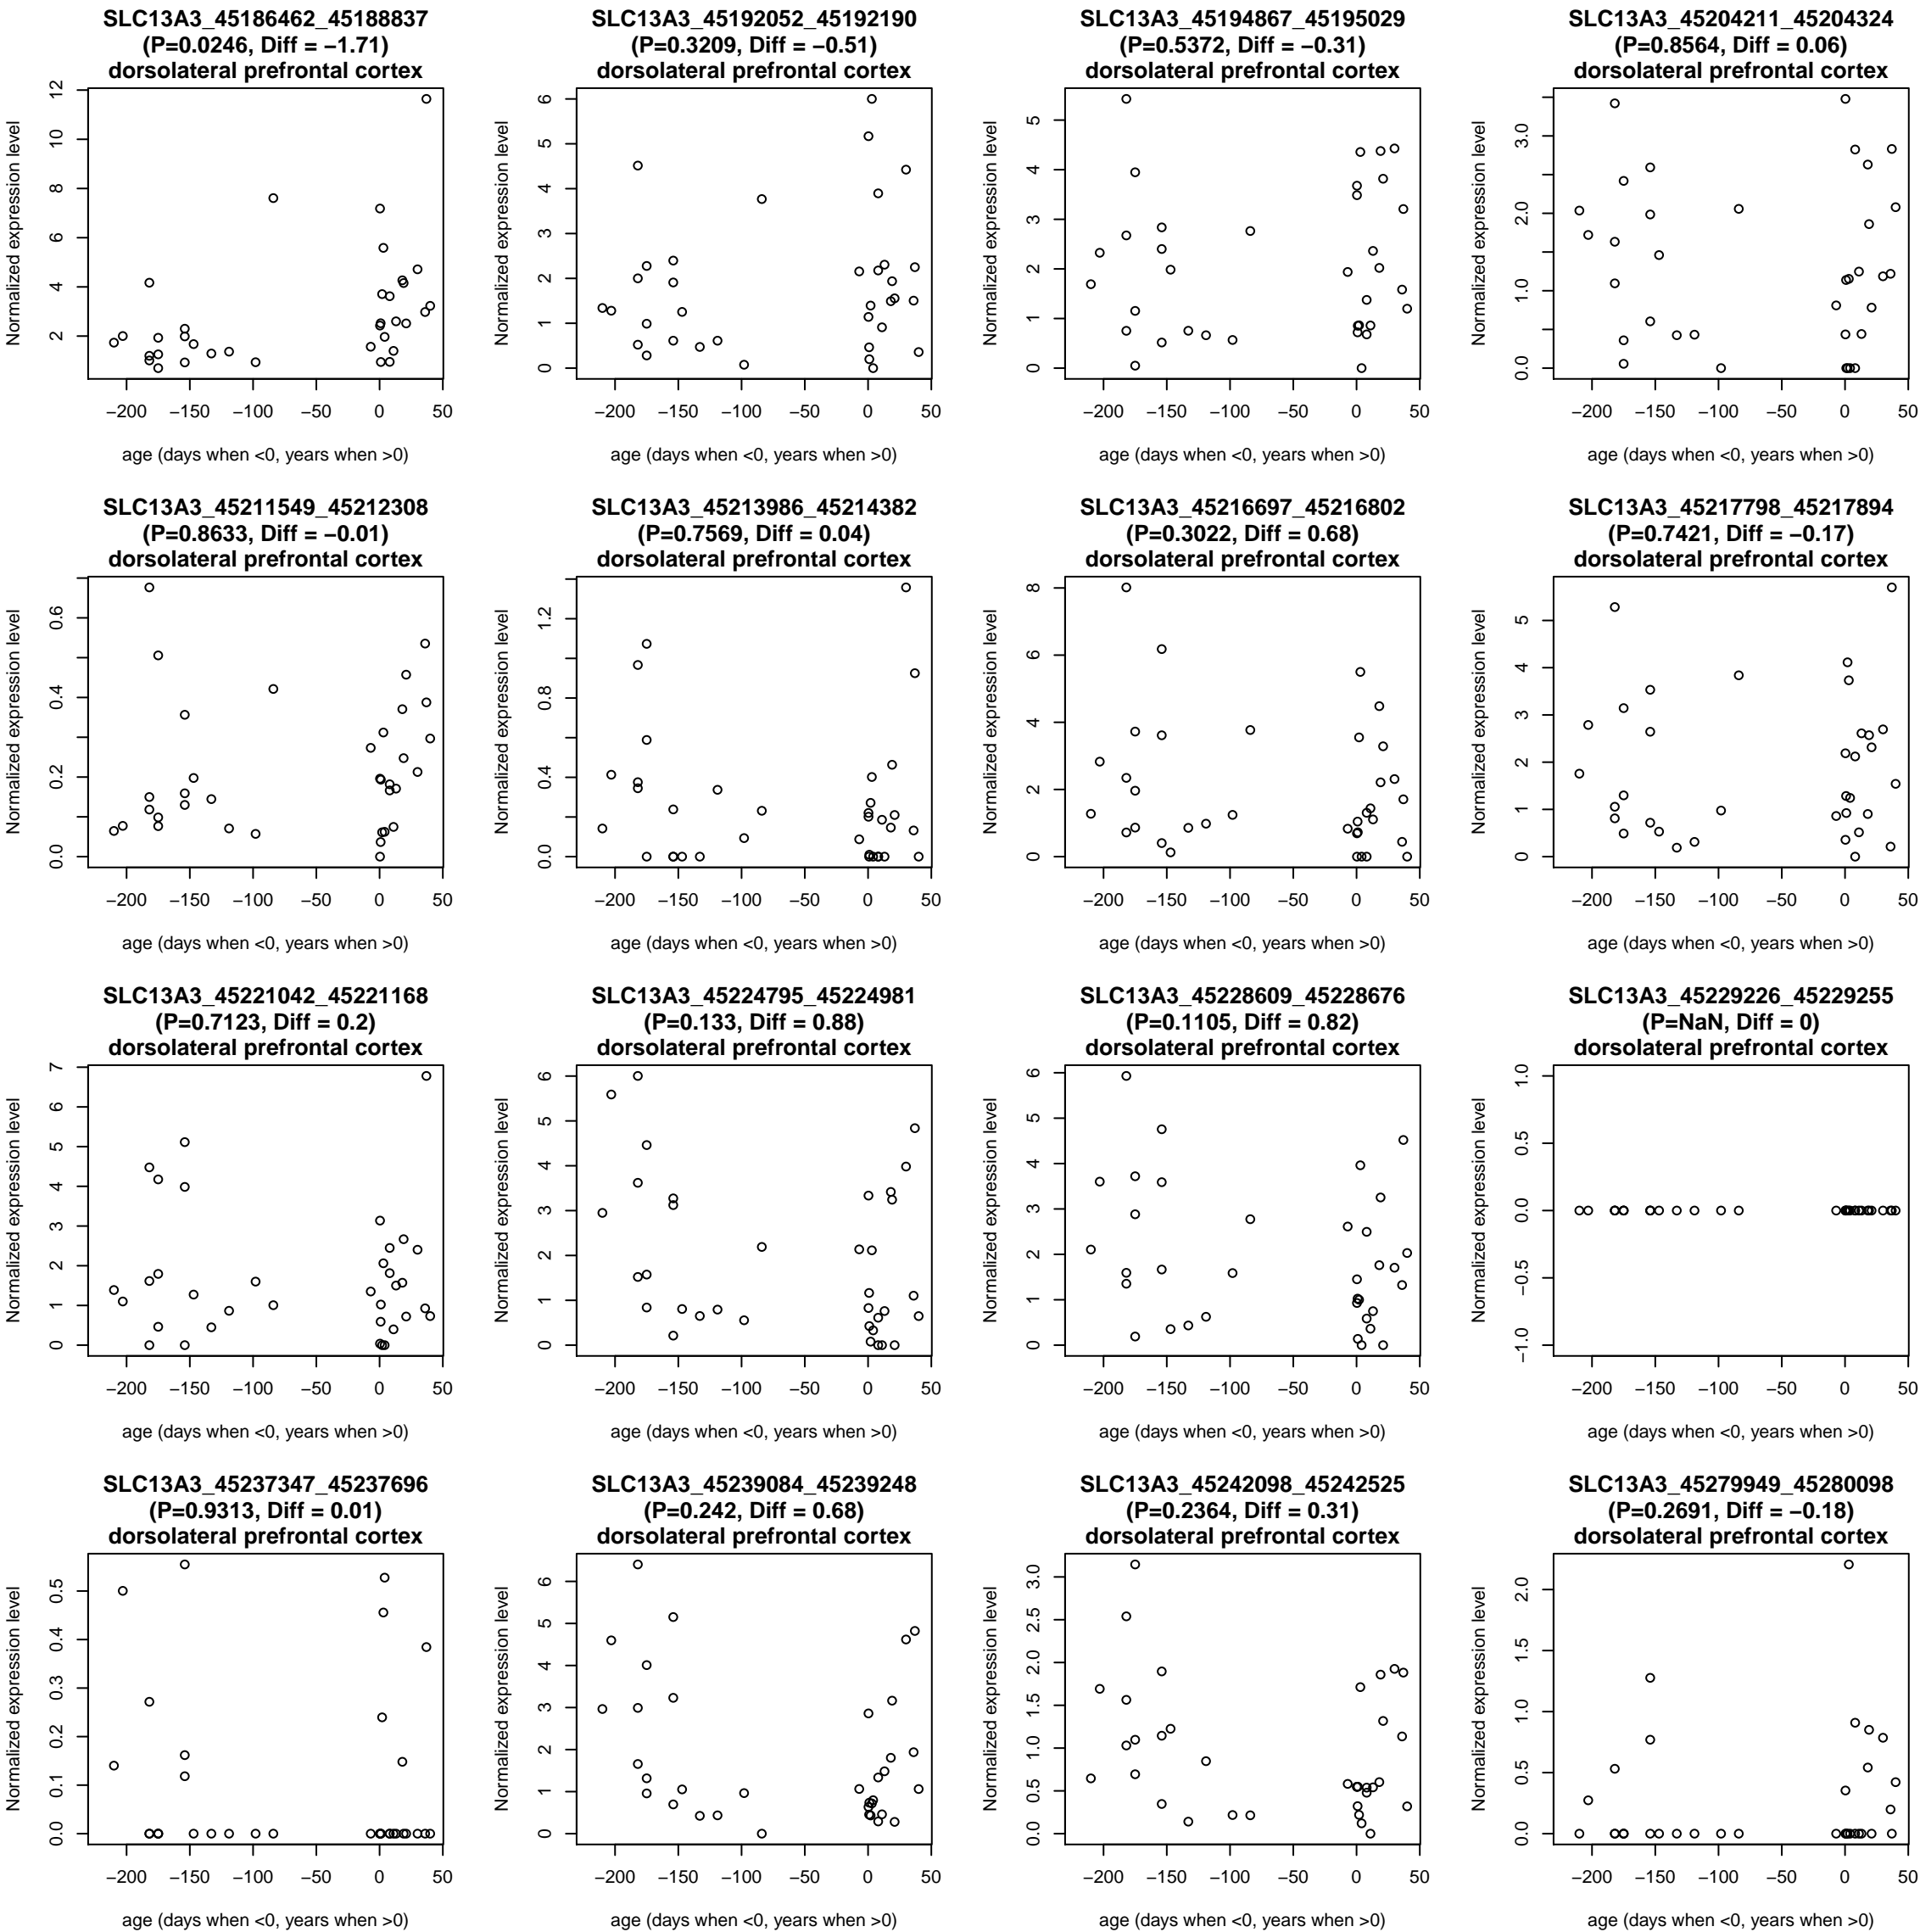

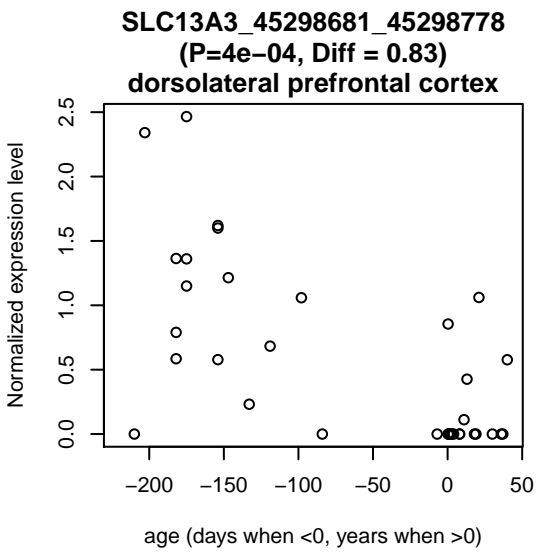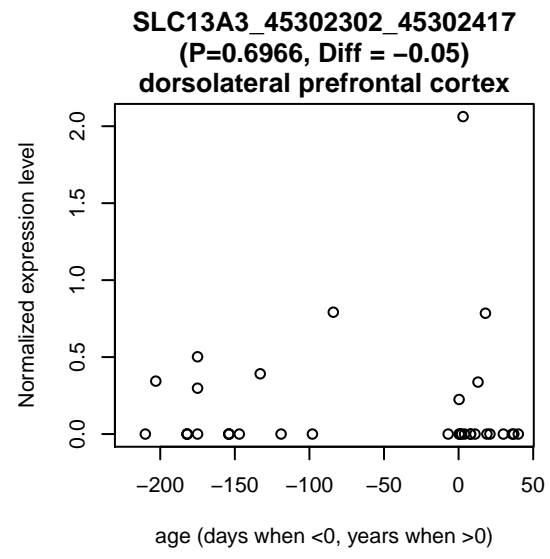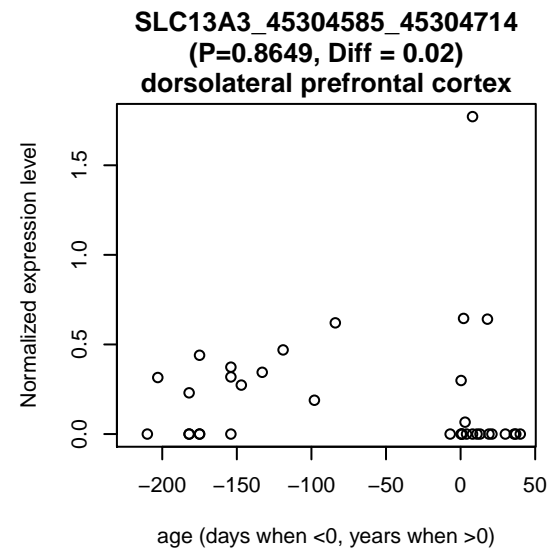

**HTR1B\_78171947\_78173490**  
**(P=0.0066, Diff = -0.56)**  
**dorsolateral prefrontal cortex**

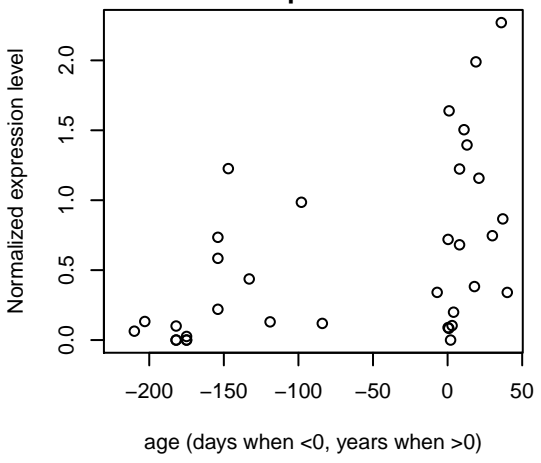

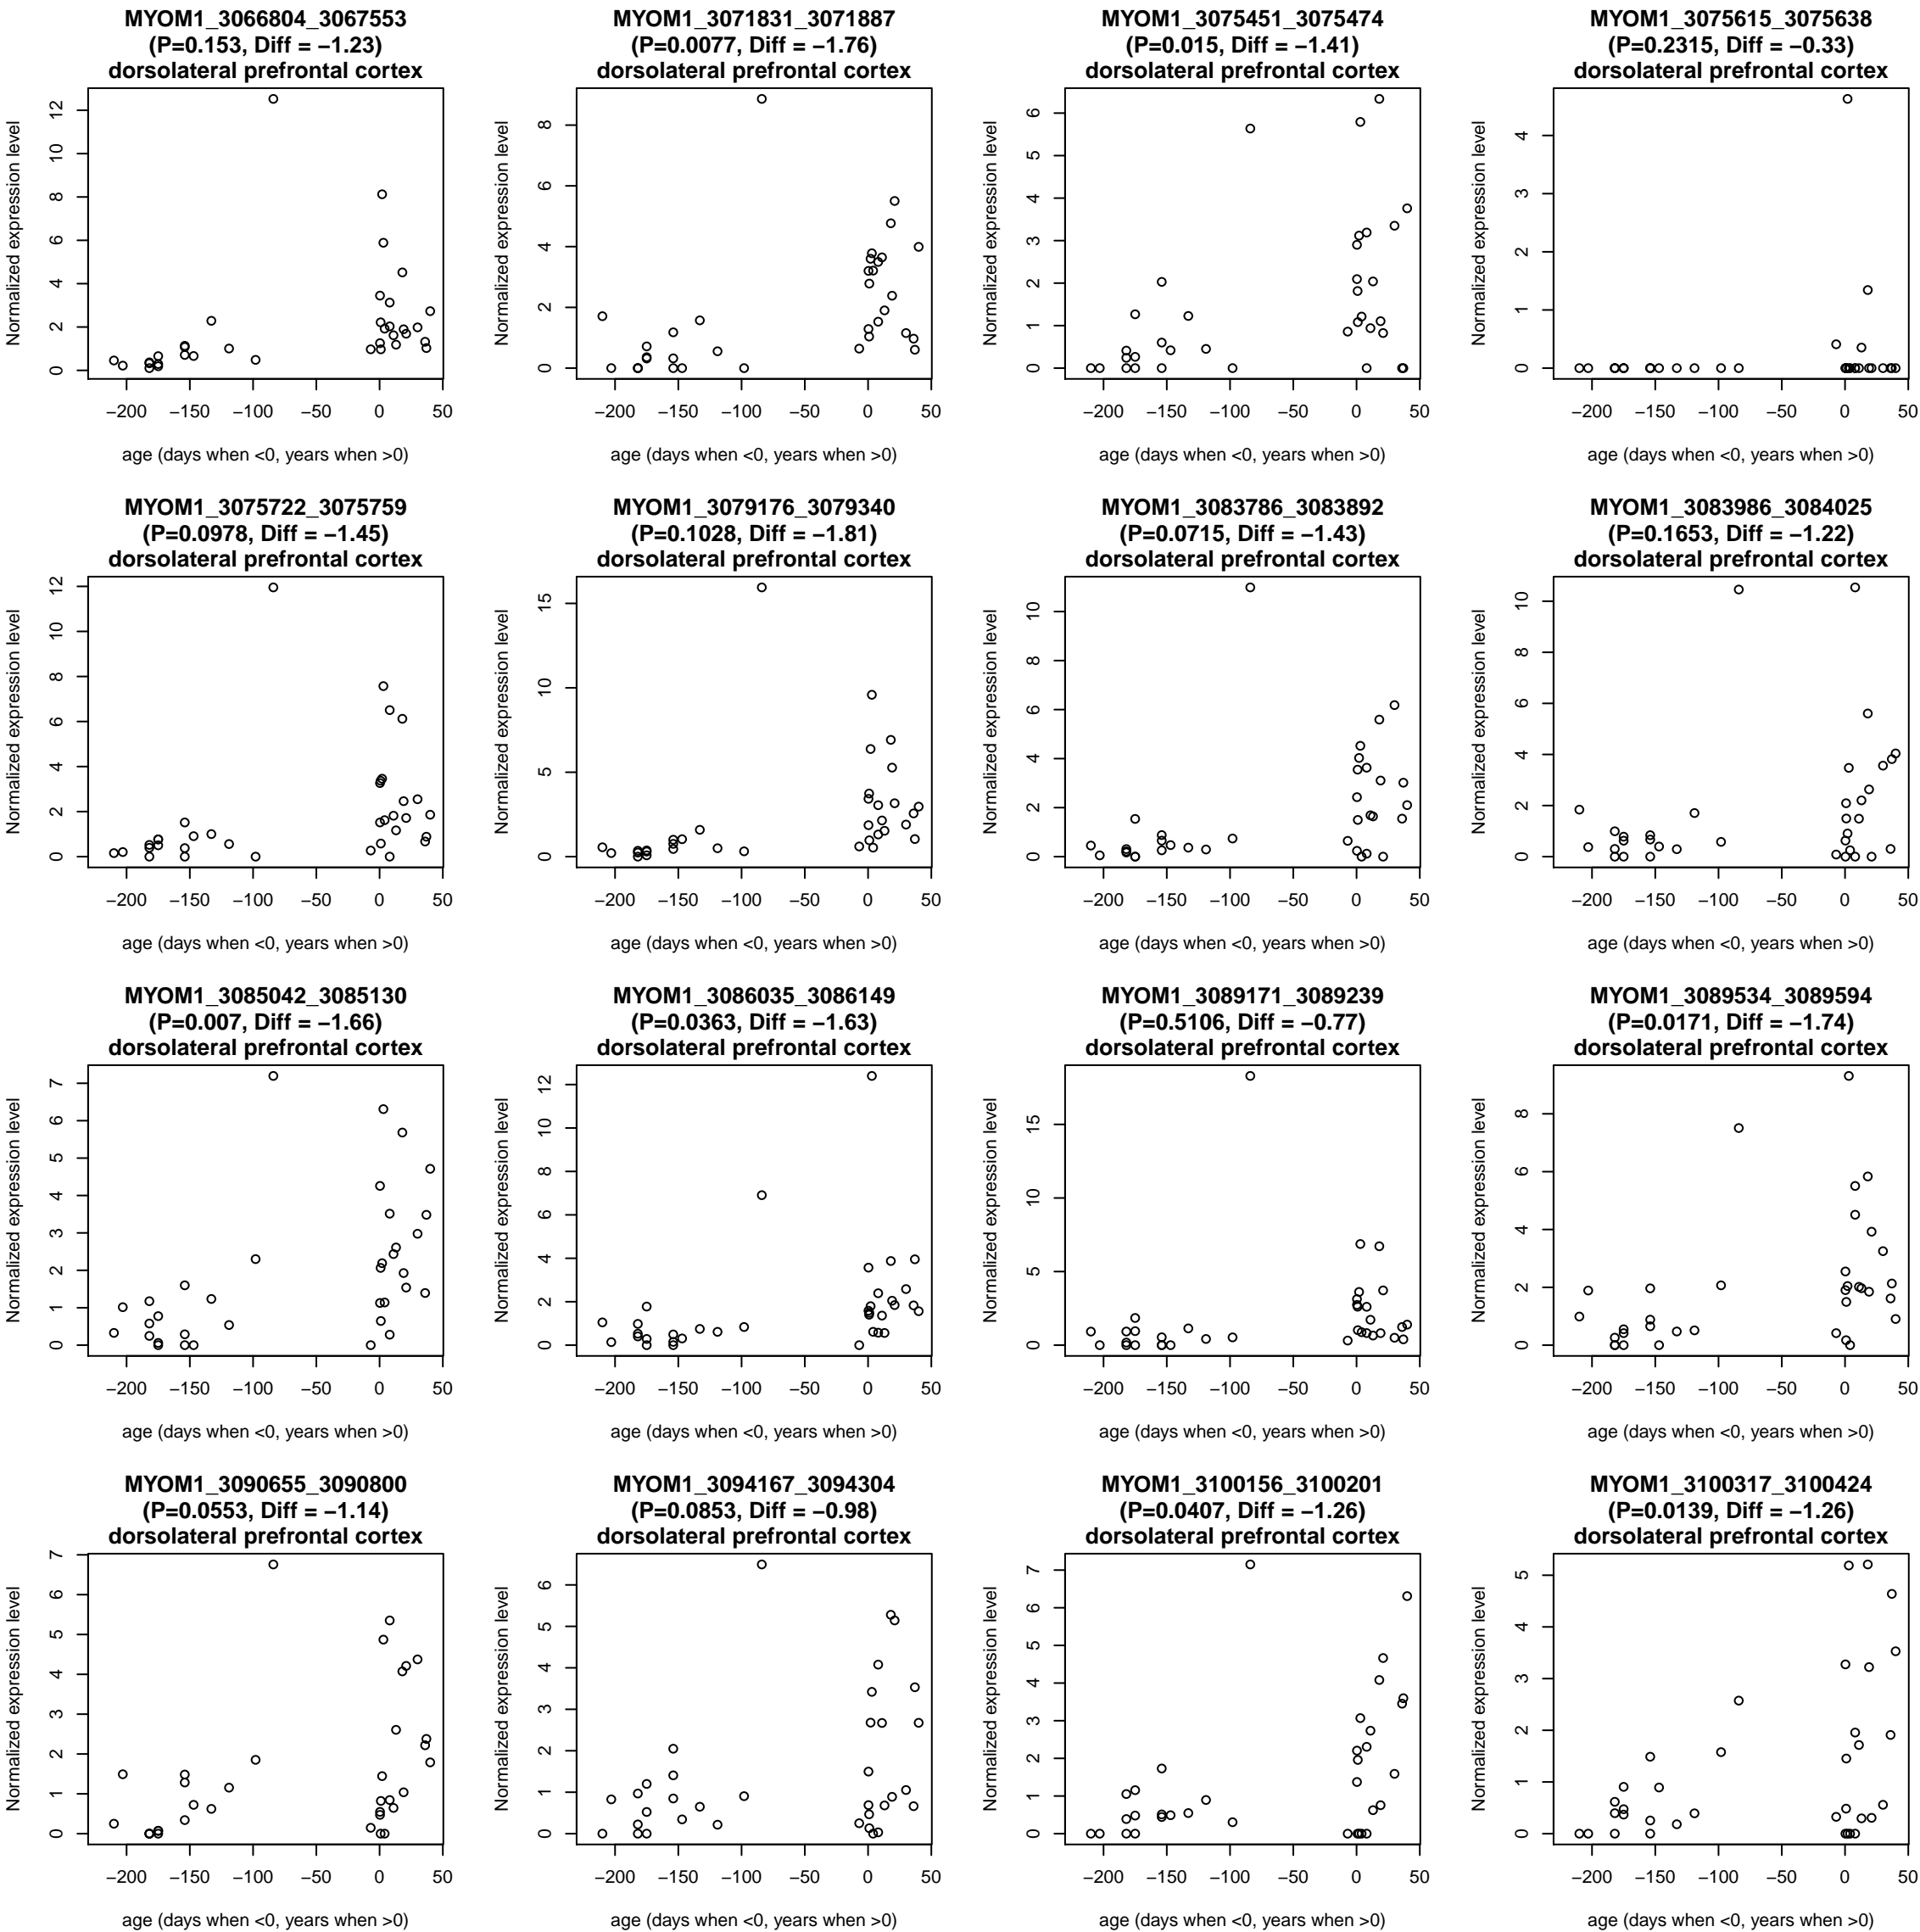

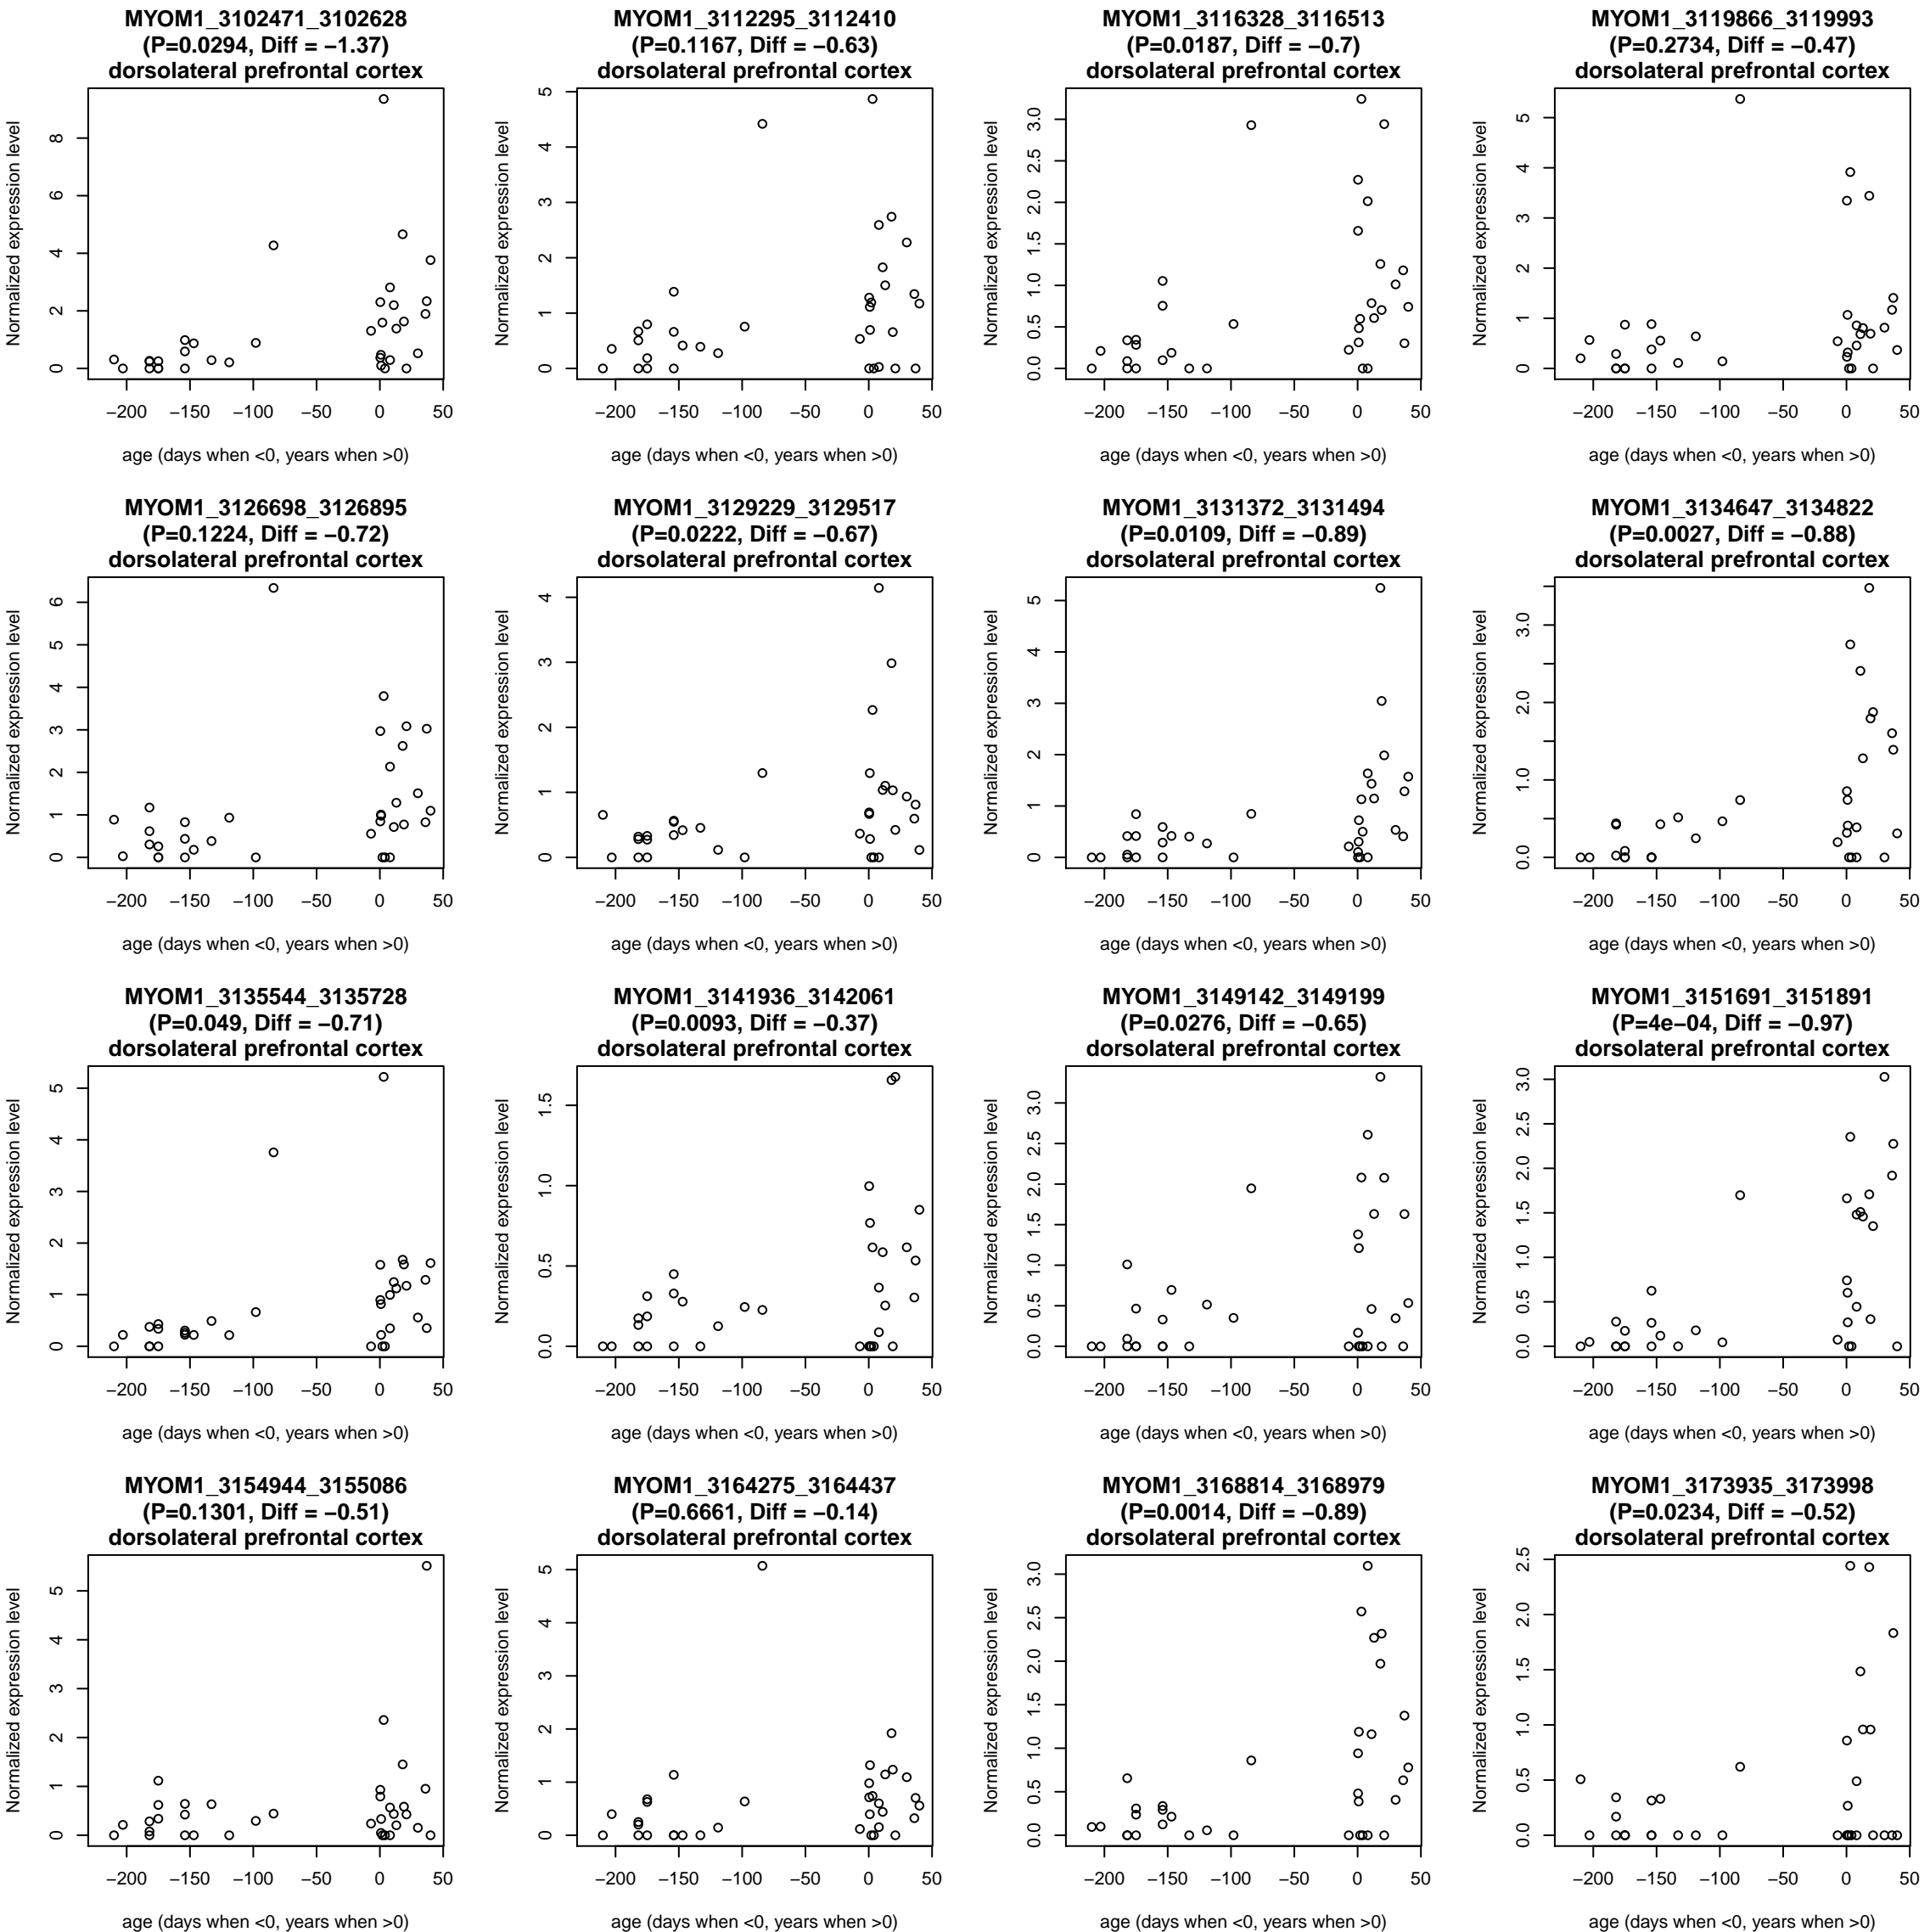



**MYOM1\_3174117\_3174206**  
(P=0.063, Diff = -0.42)  
dorsolateral prefrontal cortex

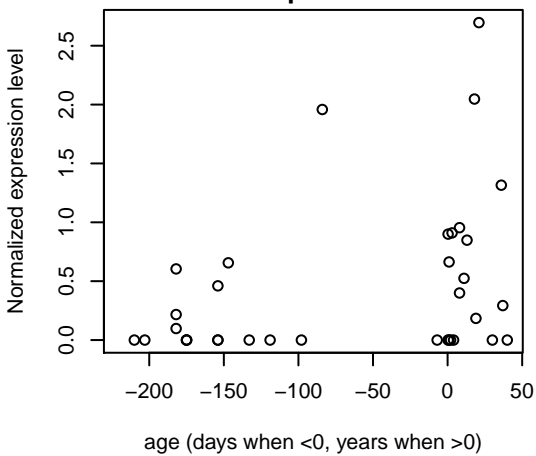

**MYOM1\_3176039\_3176132**  
(P=0.0107, Diff = -0.4)  
dorsolateral prefrontal cortex

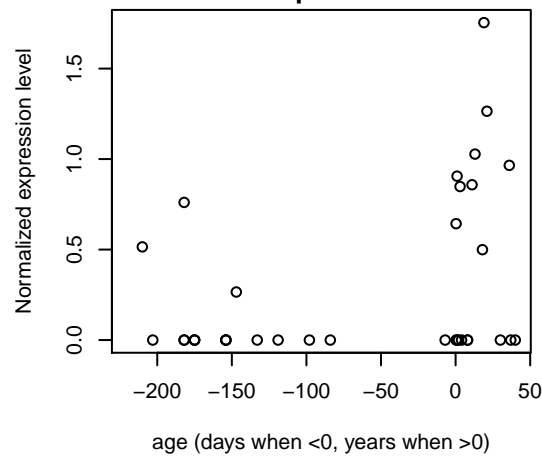

**MYOM1\_3187477\_3187635**  
(P=0.0242, Diff = -0.41)  
dorsolateral prefrontal cortex

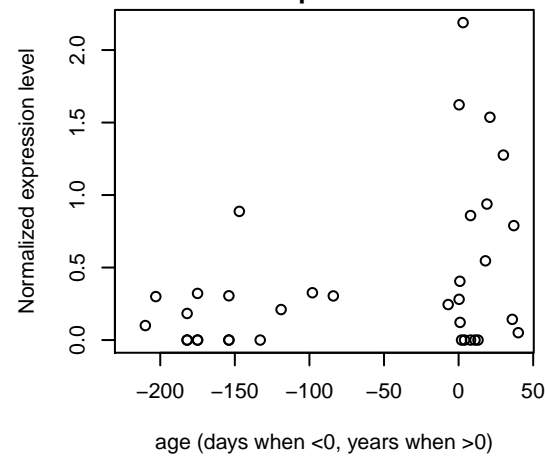

**MYOM1\_3188745\_3189085**  
(P=0.0073, Diff = -0.45)  
dorsolateral prefrontal cortex

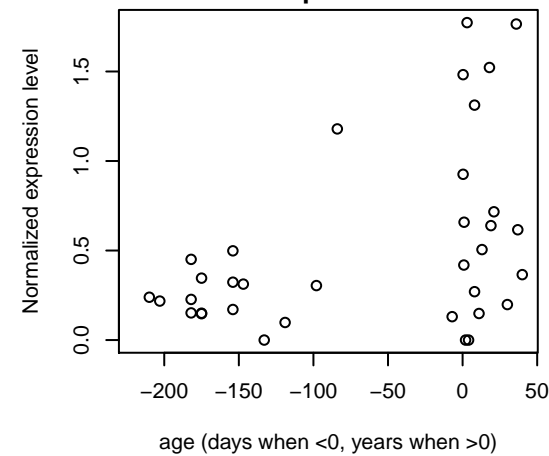

**MYOM1\_3193815\_3193956**  
(P=0.0484, Diff = -0.46)  
dorsolateral prefrontal cortex

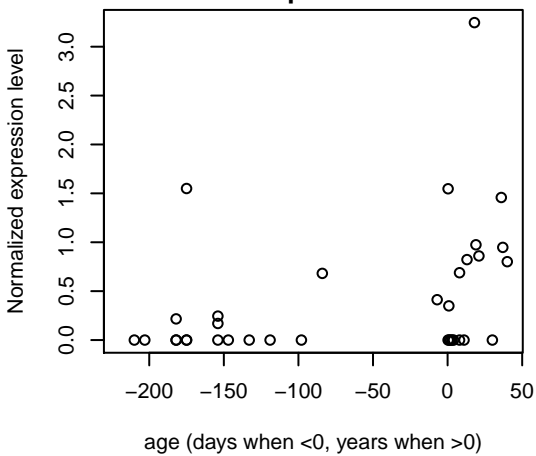

**MYOM1\_3214931\_3215249**  
(P=0.0014, Diff = -0.35)  
dorsolateral prefrontal cortex

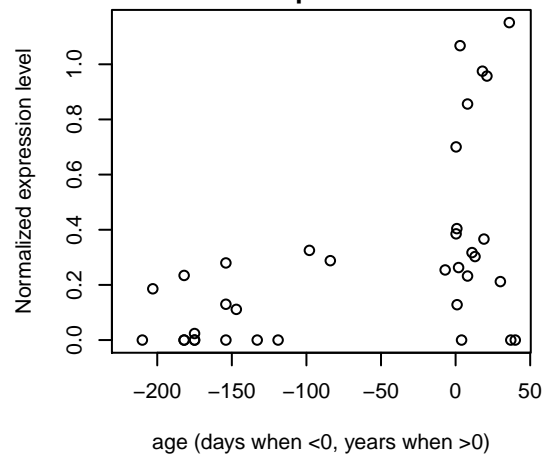

**MYOM1\_3219800\_3220106**  
(P=0.2343, Diff = -0.11)  
dorsolateral prefrontal cortex

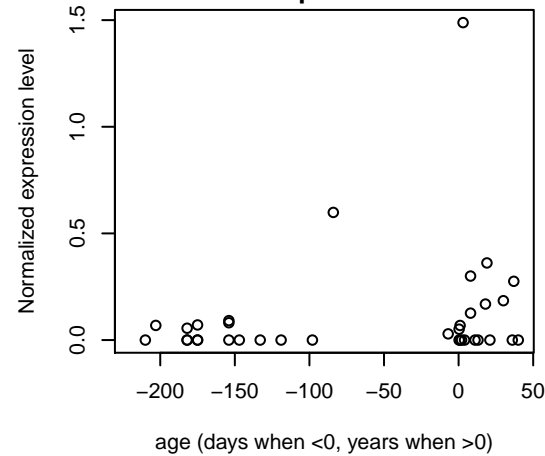

**USP44\_95910335\_95912129**  
(P=0.0996, Diff = 0.42)  
dorsolateral prefrontal cortex

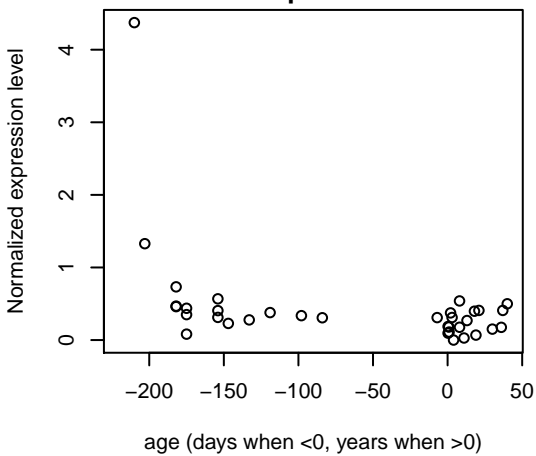

**USP44\_95914772\_95914978**  
(P=0.0885, Diff = 0.66)  
dorsolateral prefrontal cortex

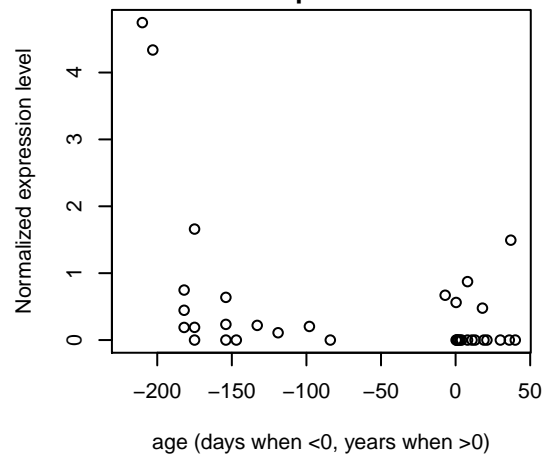

**USP44\_95918295\_95918564**  
(P=0.1736, Diff = 0.3)  
dorsolateral prefrontal cortex

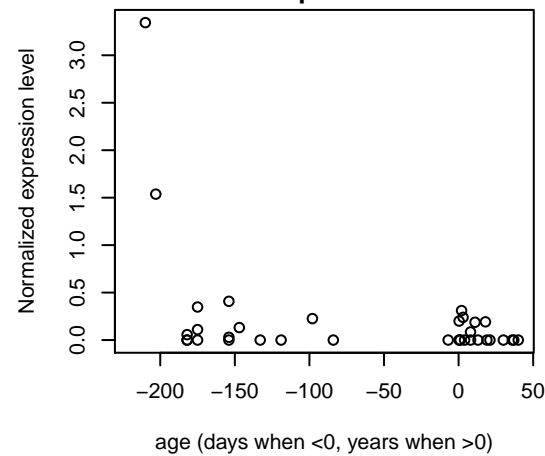

**USP44\_95922582\_95922778**  
(P=0.1249, Diff = 0.53)  
dorsolateral prefrontal cortex

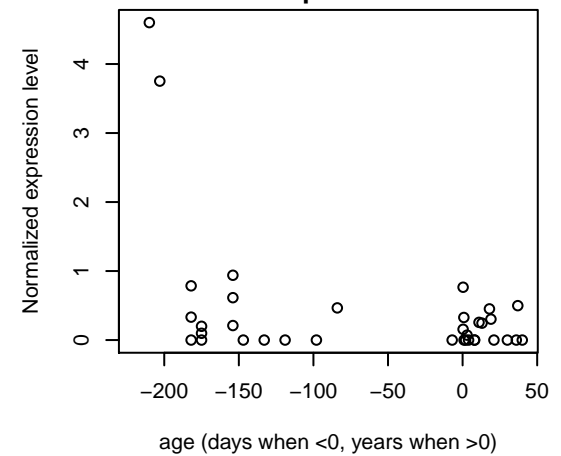

**USP44\_95926604\_95928102**  
(P=0.0635, Diff = 0.61)  
dorsolateral prefrontal cortex

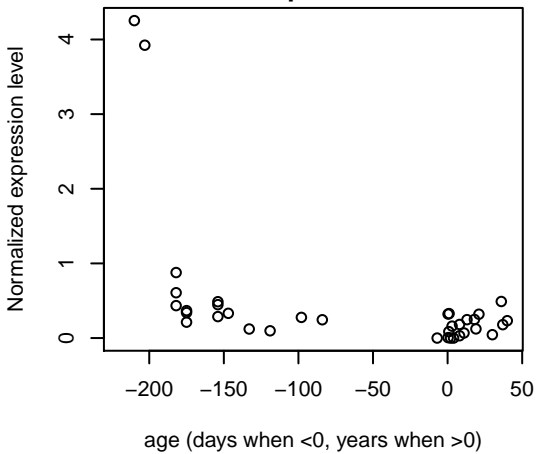

**USP44\_95929148\_95929202**  
(P=0.6349, Diff = -0.04)  
dorsolateral prefrontal cortex

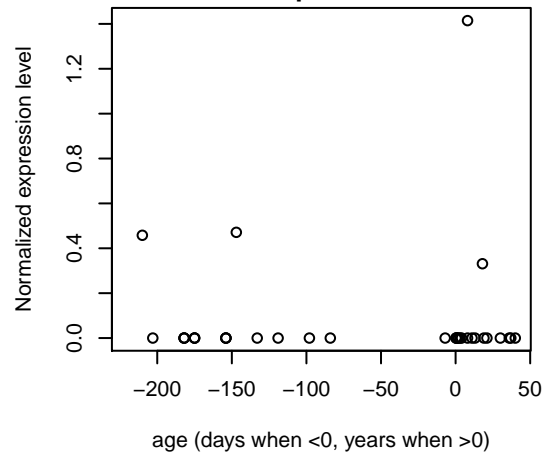

**USP44\_95940225\_95940766**  
(P=0.389, Diff = -0.03)  
dorsolateral prefrontal cortex

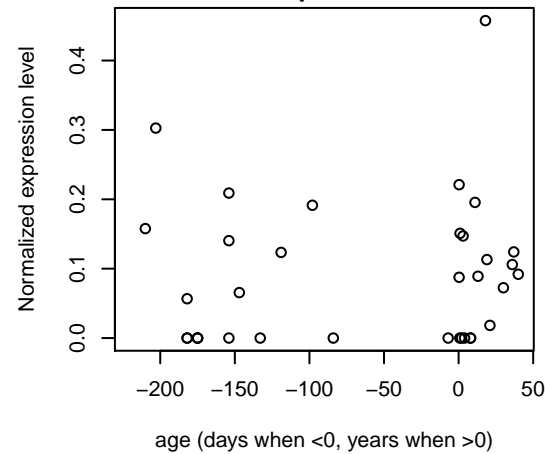

**USP44\_95941758\_95942048**  
(P=0.729, Diff = 0.01)  
dorsolateral prefrontal cortex

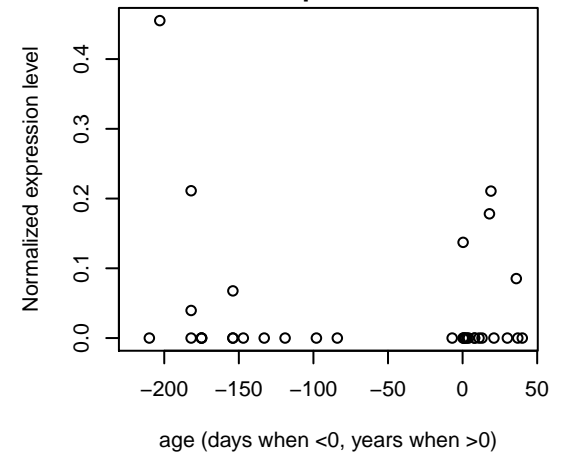

**USP44\_95942301\_95942620**  
(P=0.8139, Diff = -0.01)  
dorsolateral prefrontal cortex

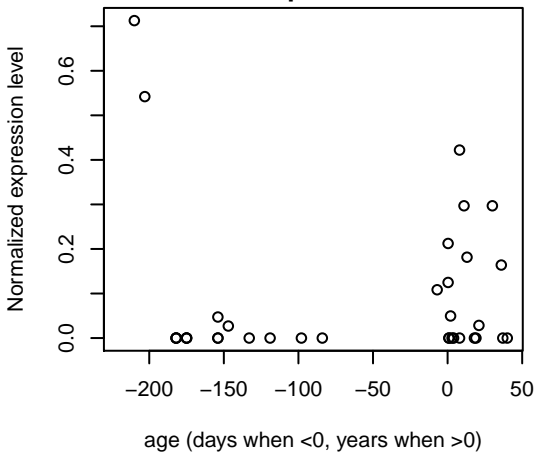

**USP44\_95945047\_95945266**  
(P=0.3313, Diff = -0.02)  
dorsolateral prefrontal cortex

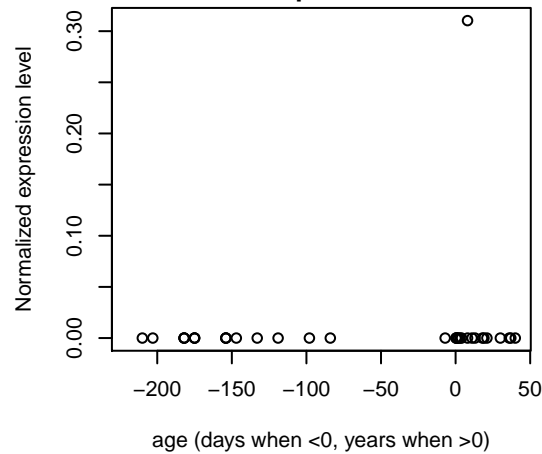

**IGFBP7\_57896938\_57897502**  
(P=0.1529, Diff = -20.75)  
dorsolateral prefrontal cortex

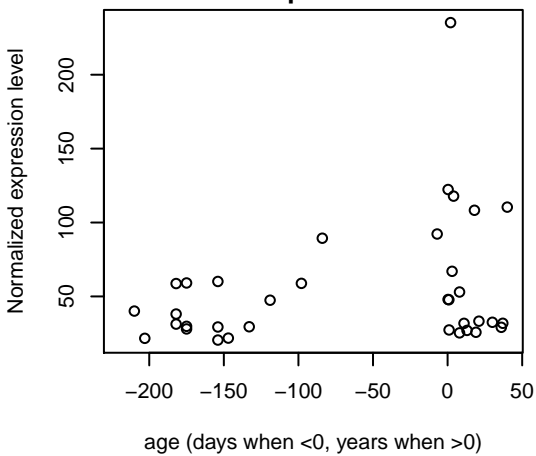

**IGFBP7\_57898203\_57898718**  
(P=0.04, Diff = -28.02)  
dorsolateral prefrontal cortex

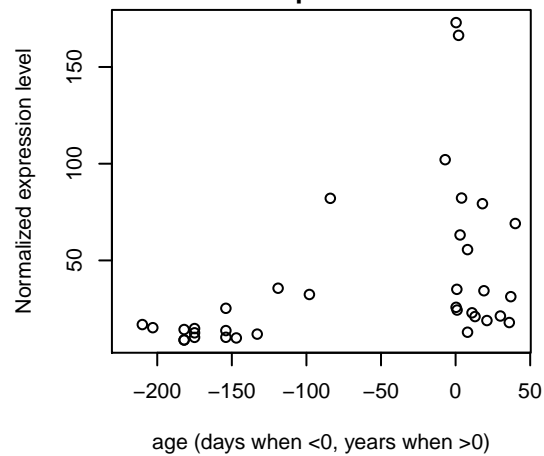

**IGFBP7\_57899360\_57899477**  
(P=0.0619, Diff = -87.19)  
dorsolateral prefrontal cortex

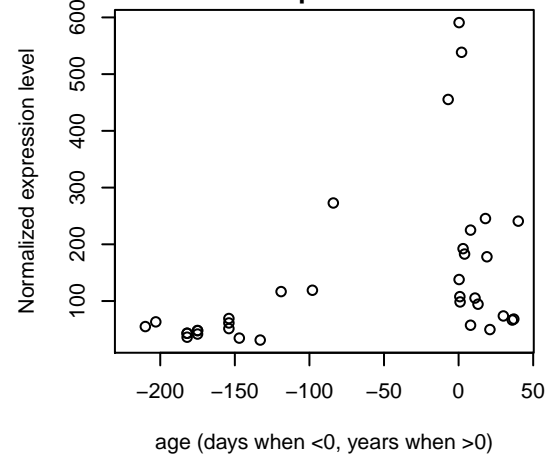

**IGFBP7\_57906989\_57907099**  
(P=0.0845, Diff = -71.36)  
dorsolateral prefrontal cortex

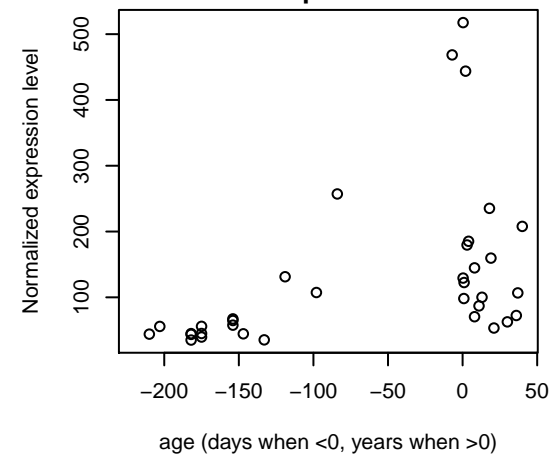

**IGFBP7\_57976042\_57976551**  
(P=0.2199, Diff = -11.95)  
dorsolateral prefrontal cortex

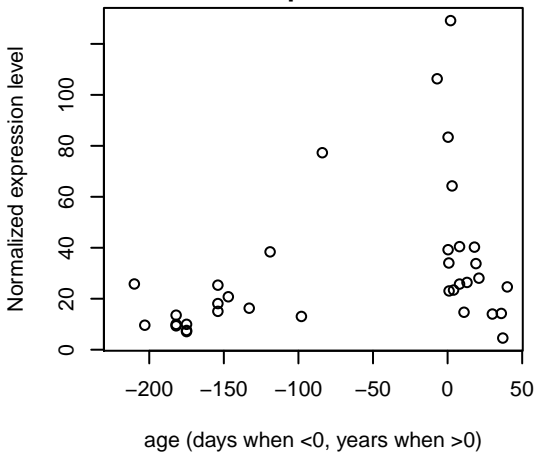

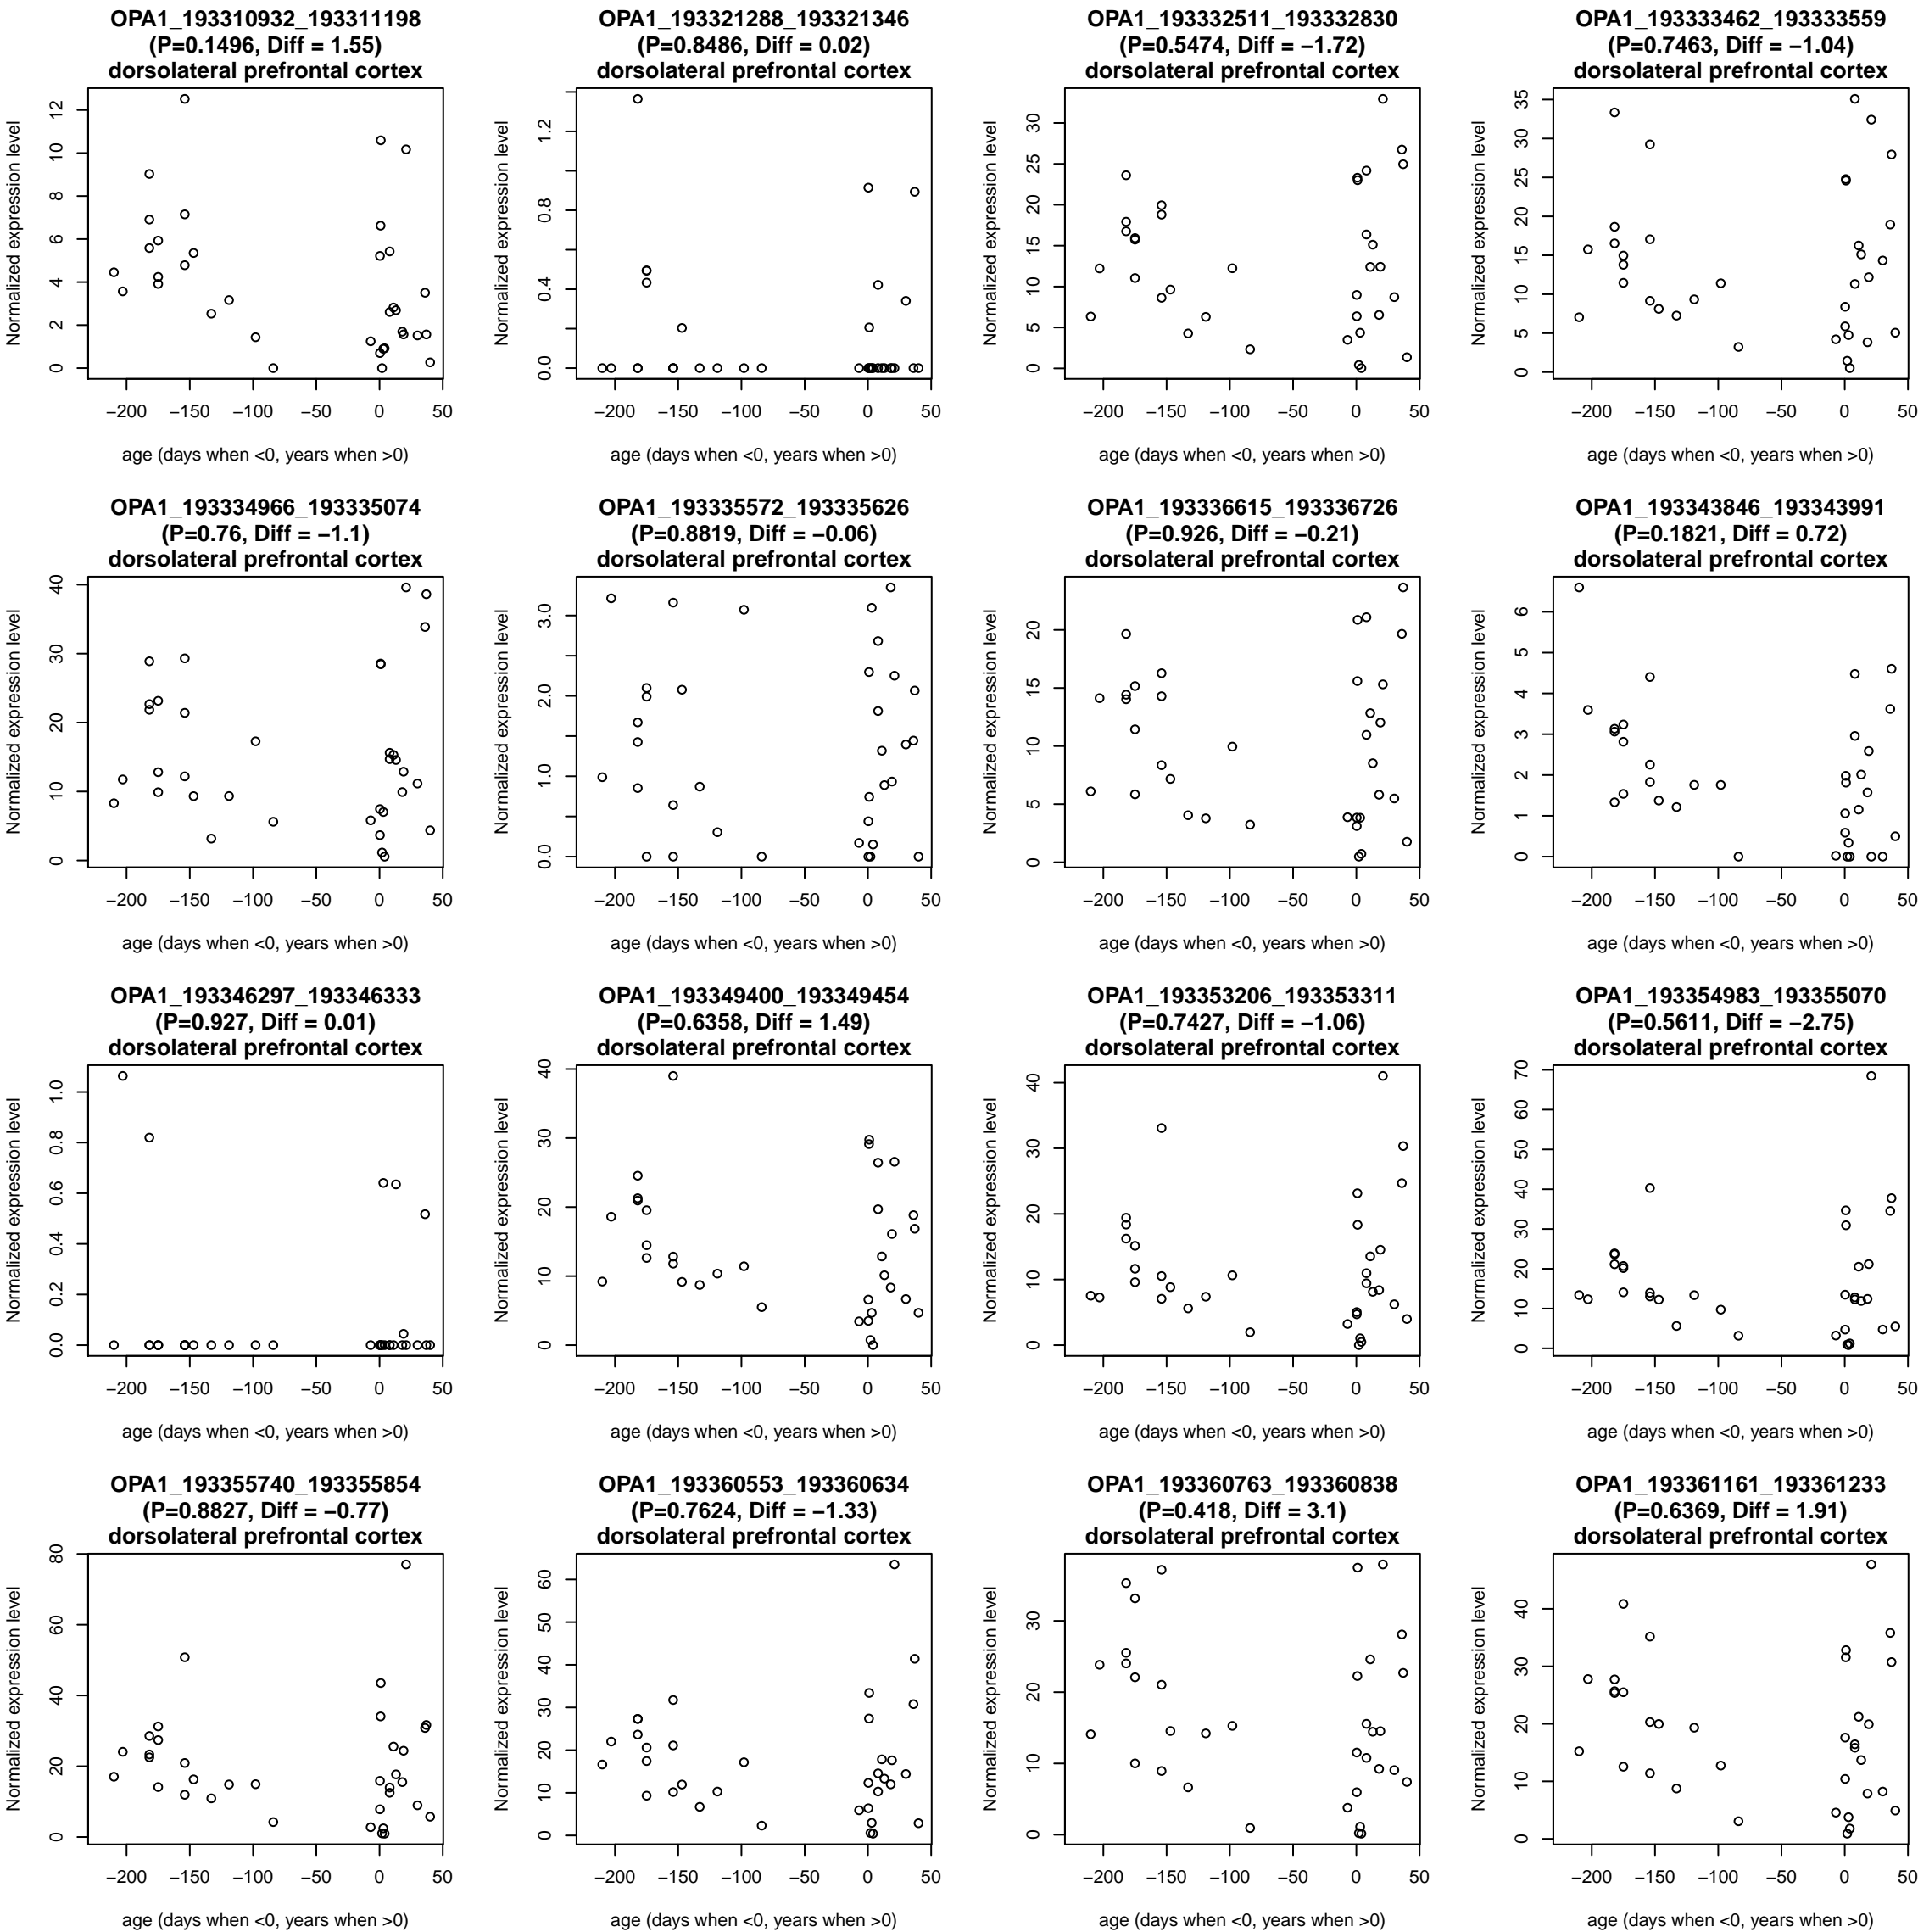

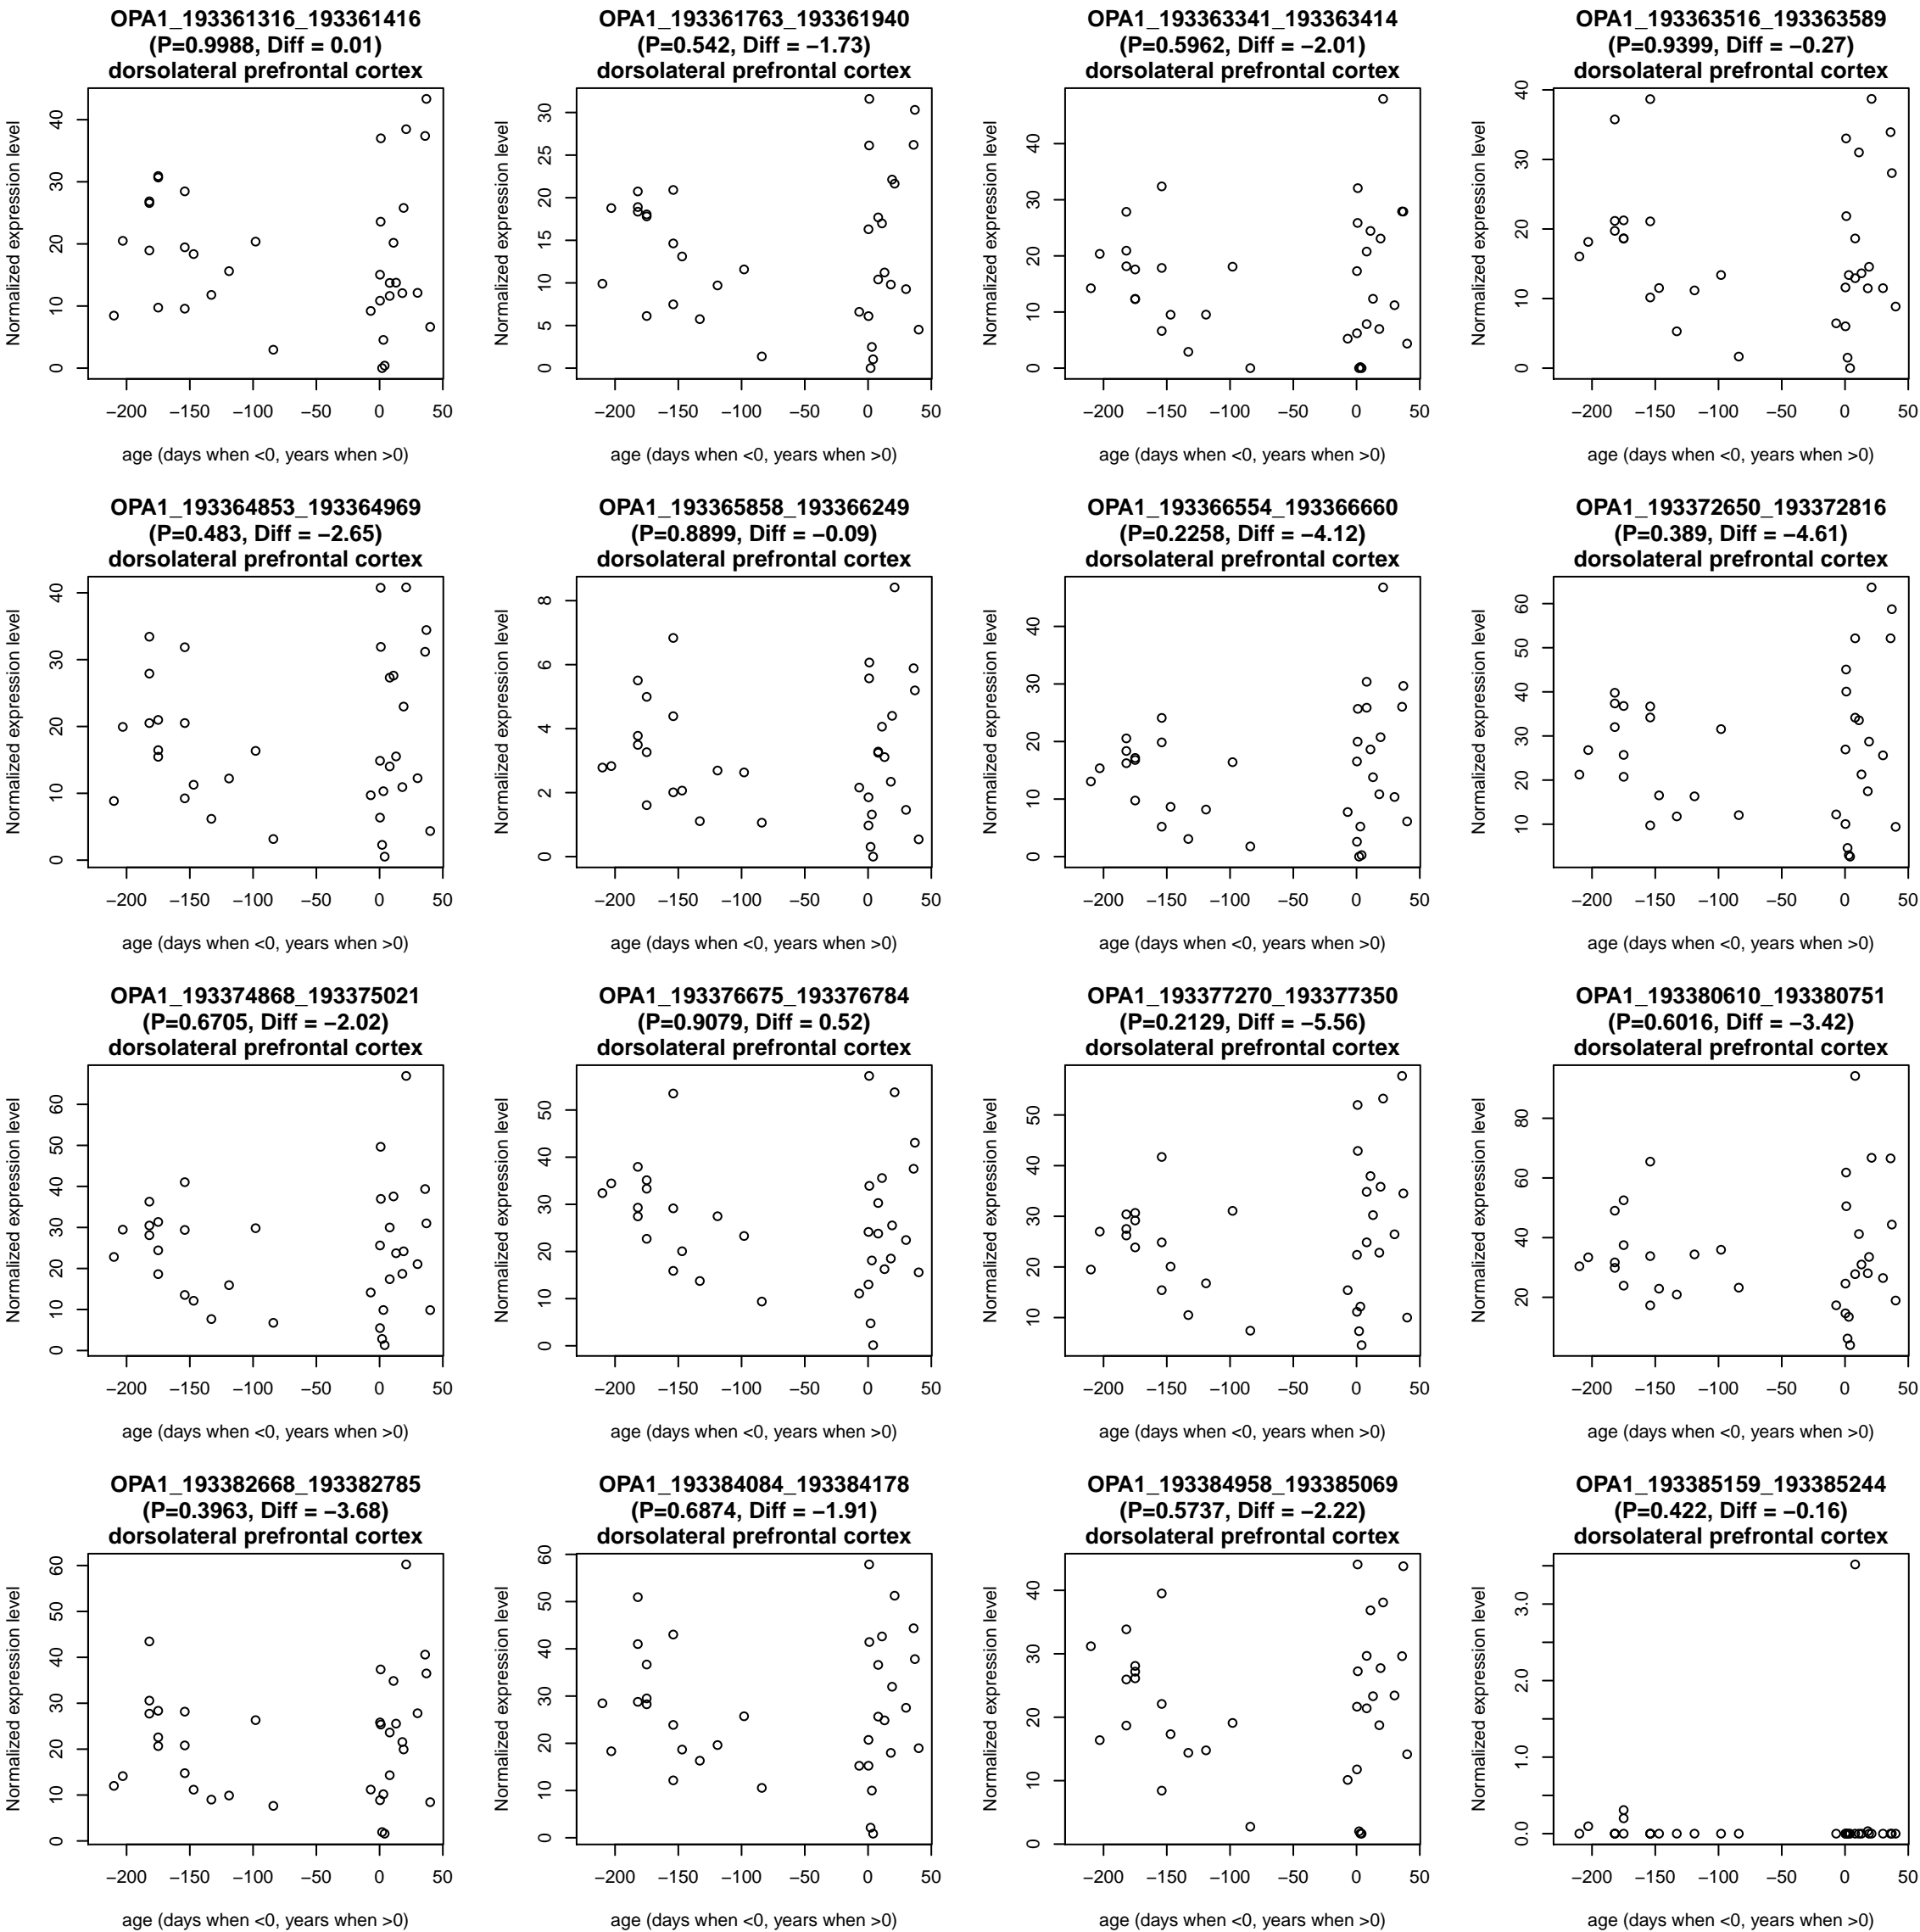

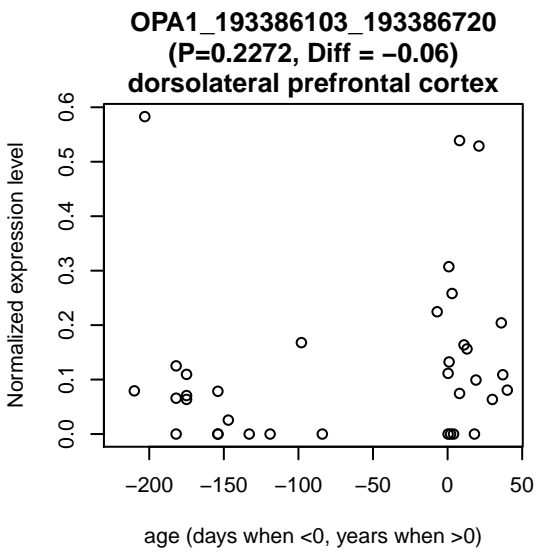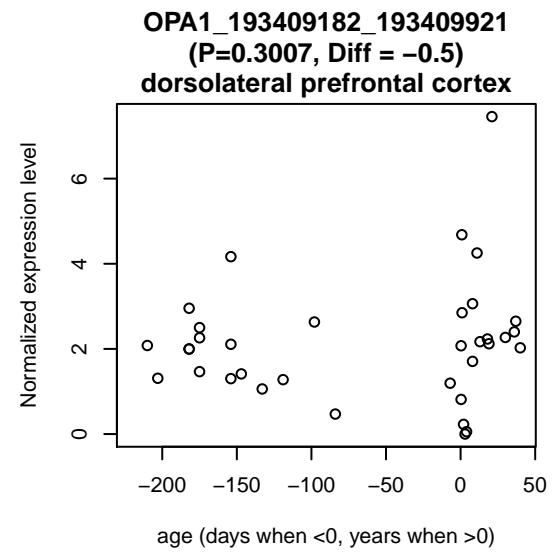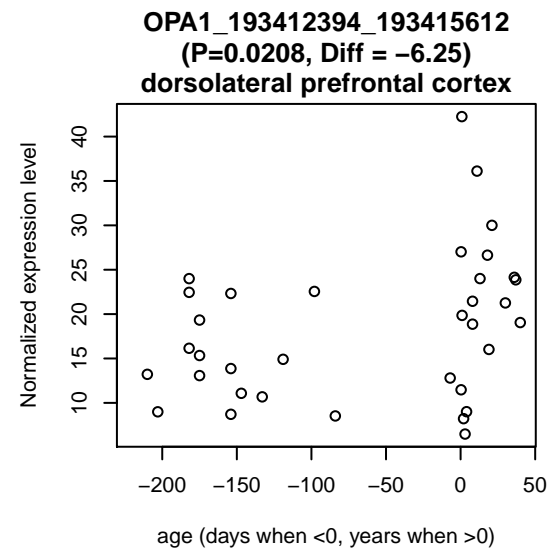

**ZMAT4\_40388108\_40389757**  
(P=0, Diff = -6.84)  
dorsolateral prefrontal cortex

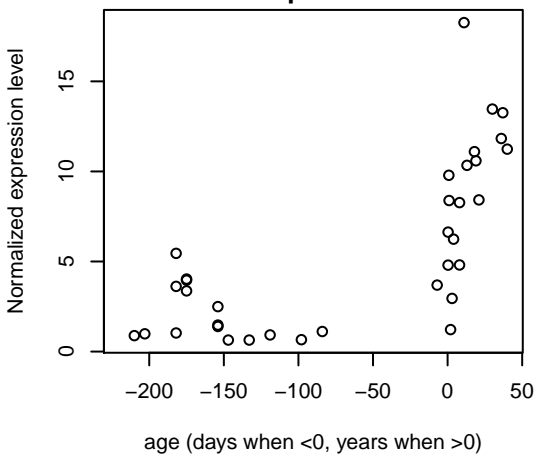

**ZMAT4\_40438683\_40438780**  
(P=1e-04, Diff = -7.25)  
dorsolateral prefrontal cortex

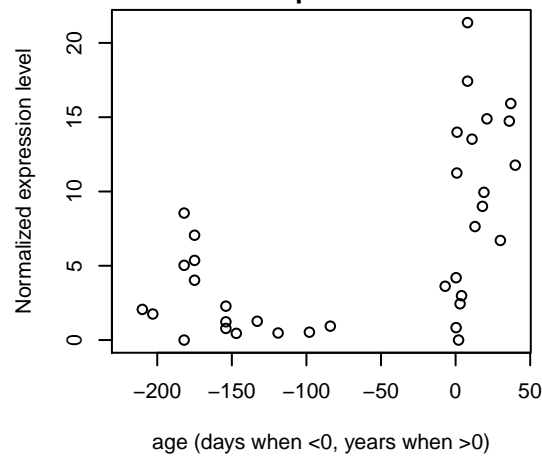

**ZMAT4\_40531882\_40532450**  
(P=1e-04, Diff = -2.2)  
dorsolateral prefrontal cortex

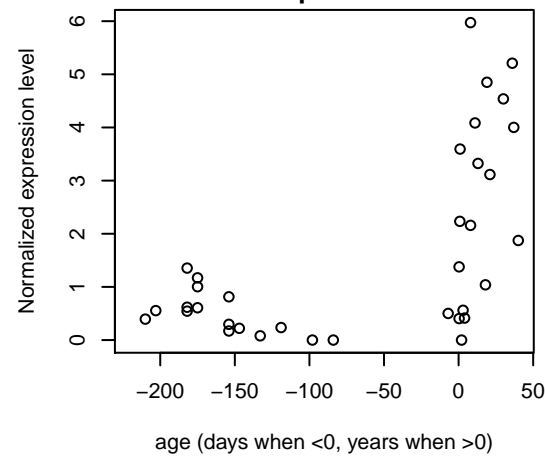

**ZMAT4\_40554514\_40554920**  
(P=1e-04, Diff = -1.71)  
dorsolateral prefrontal cortex

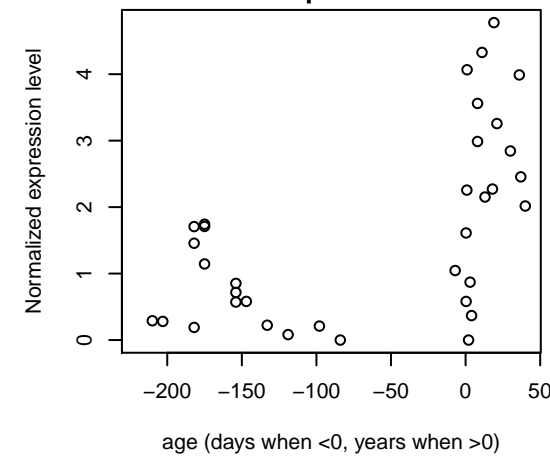

**ZMAT4\_40625159\_40625249**  
(P=0.0018, Diff = -3.93)  
dorsolateral prefrontal cortex

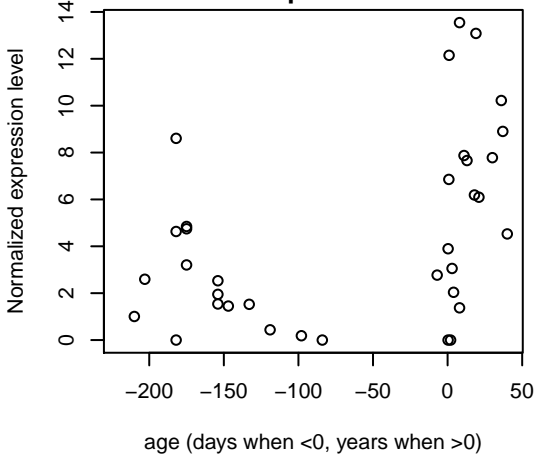

**ZMAT4\_40644207\_40644301**  
(P=0.3431, Diff = -0.12)  
dorsolateral prefrontal cortex

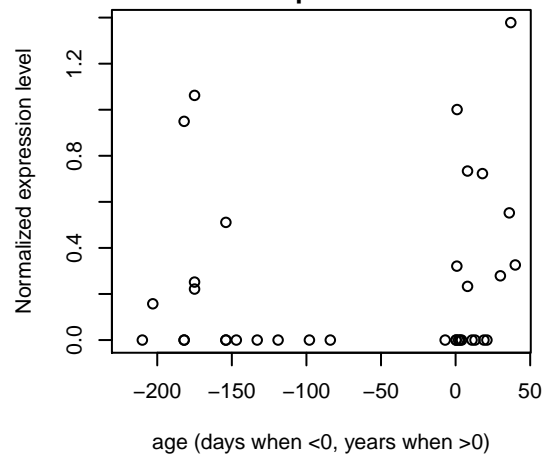

**ZMAT4\_40666027\_40666090**  
(P=0.9105, Diff = -0.02)  
dorsolateral prefrontal cortex

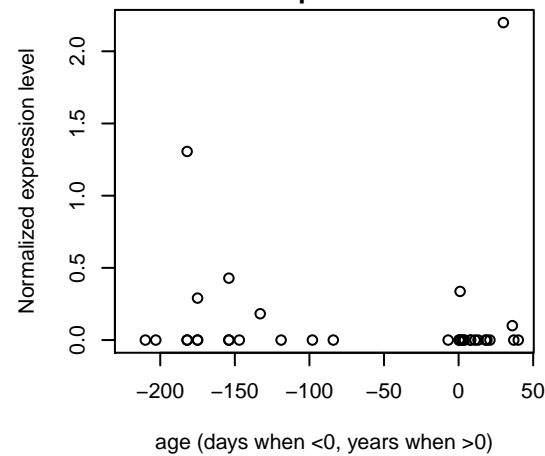

**ZMAT4\_40683093\_40683199**  
(P=5e-04, Diff = -5.41)  
dorsolateral prefrontal cortex

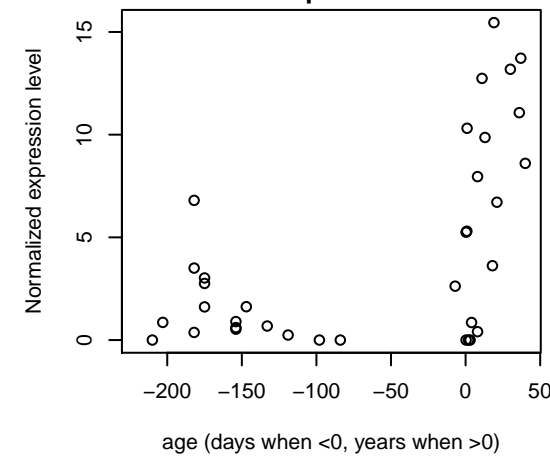

**ZMAT4\_40742047\_40742463**  
(P=4e-04, Diff = -0.19)  
dorsolateral prefrontal cortex

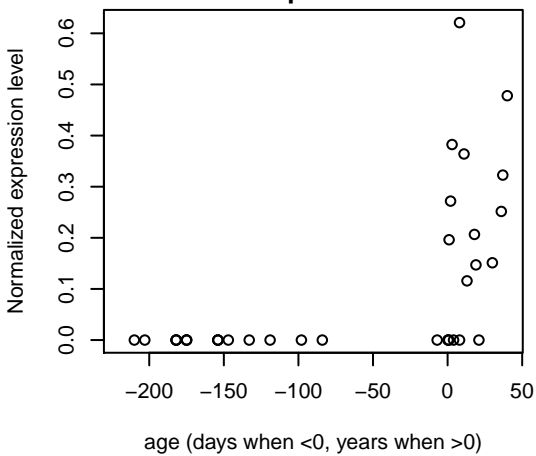

**ZMAT4\_40746013\_40746064**  
(P=0.3313, Diff = -0.02)  
dorsolateral prefrontal cortex

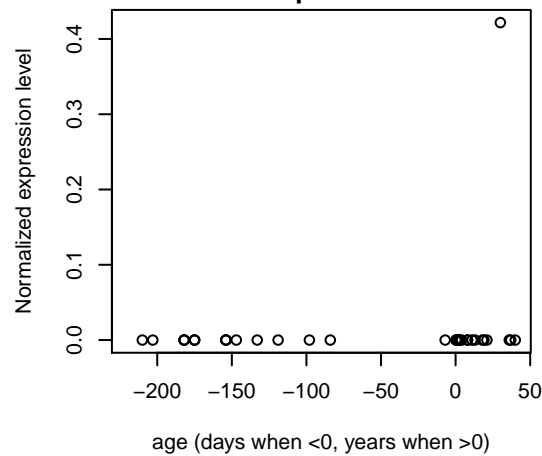

**ZMAT4\_40755201\_40755352**  
(P=0.0069, Diff = -1.08)  
dorsolateral prefrontal cortex

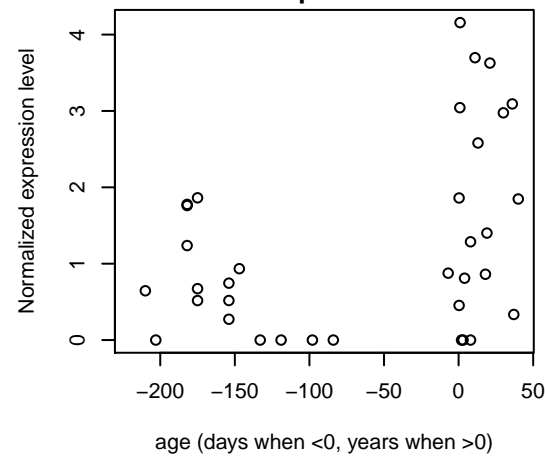

**CNDP1\_72201674\_72201926**  
( $P=0.0013$ , Diff =  $-5.11$ )  
dorsolateral prefrontal cortex

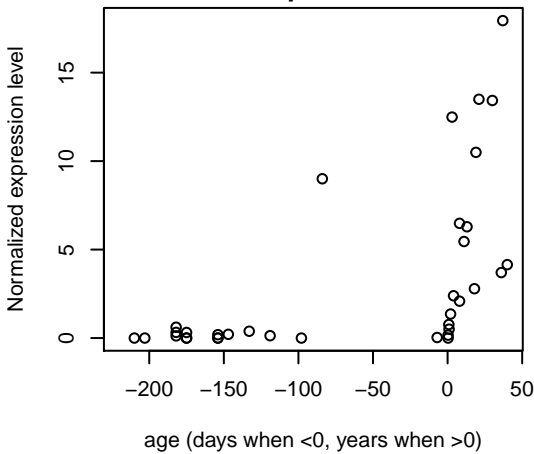

**CNDP1\_72223572\_72223701**  
( $P=0.0026$ , Diff =  $-10.04$ )  
dorsolateral prefrontal cortex

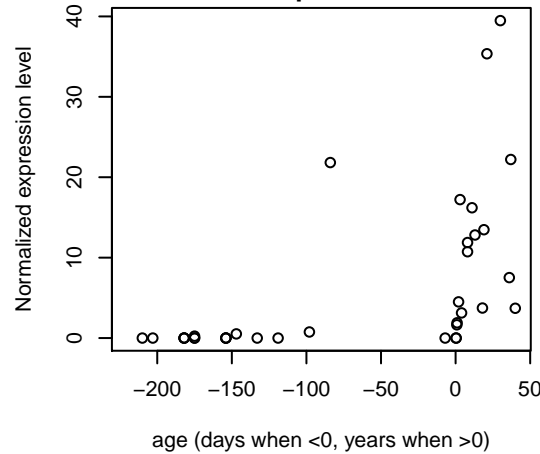

**CNDP1\_72226557\_72226707**  
( $P=4e-04$ , Diff =  $-11.3$ )  
dorsolateral prefrontal cortex

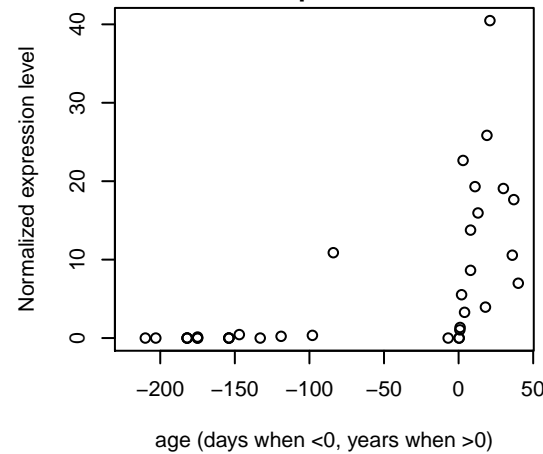

**CNDP1\_72228090\_72228253**  
( $P=0.001$ , Diff =  $-13.69$ )  
dorsolateral prefrontal cortex

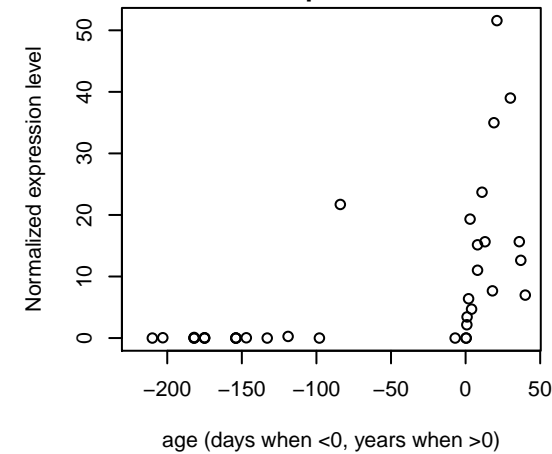

**CNDP1\_72229281\_72229370**  
( $P=7e-04$ , Diff =  $-22.29$ )  
dorsolateral prefrontal cortex

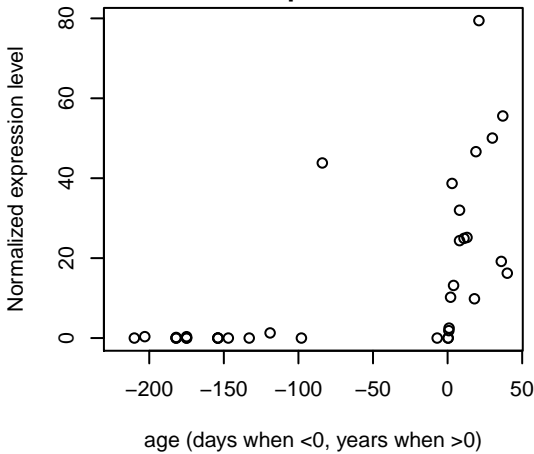

**CNDP1\_72234467\_72234668**  
( $P=0.0021$ , Diff =  $-26.75$ )  
dorsolateral prefrontal cortex

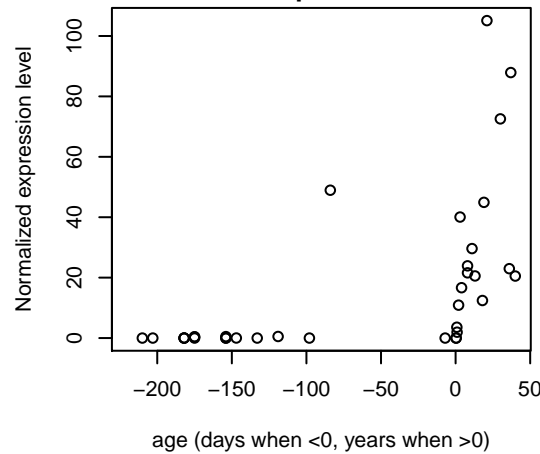

**CNDP1\_72238420\_72238505**  
( $P=0.0026$ , Diff =  $-29.81$ )  
dorsolateral prefrontal cortex

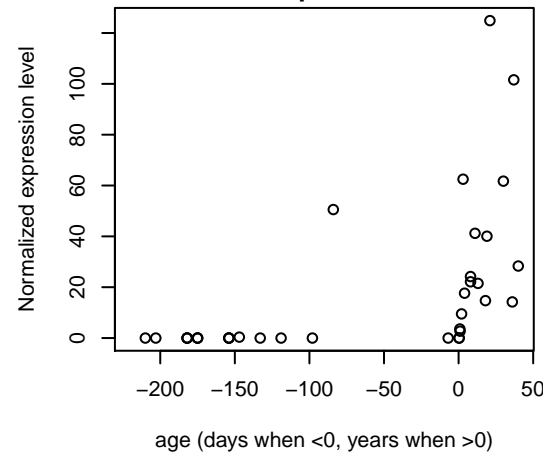

**CNDP1\_72244103\_72244264**  
( $P=0.0014$ , Diff =  $-22.2$ )  
dorsolateral prefrontal cortex

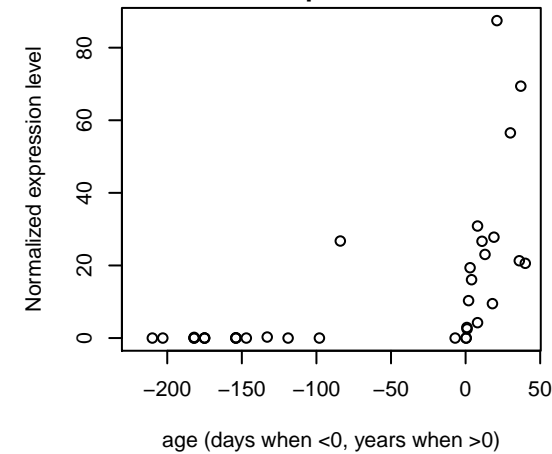

**CNDP1\_72245397\_72245562**  
( $P=0.0012$ , Diff =  $-29.43$ )  
dorsolateral prefrontal cortex

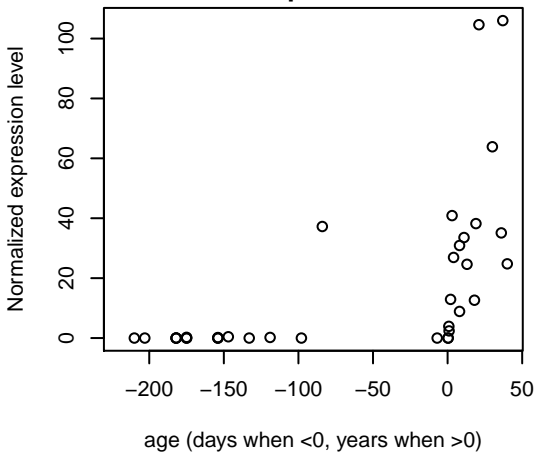

**CNDP1\_72247365\_72247507**  
( $P=0.001$ , Diff =  $-36.45$ )  
dorsolateral prefrontal cortex

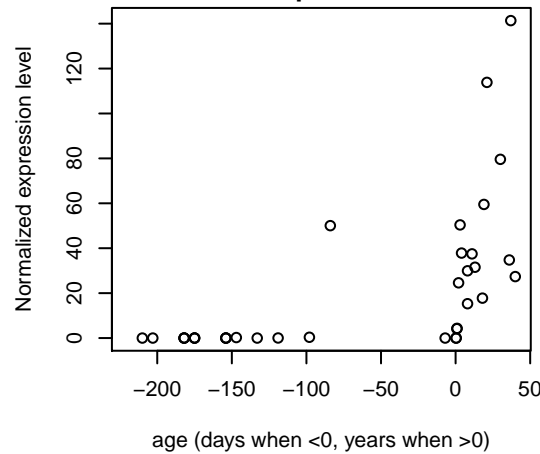

**CNDP1\_72250796\_72250944**  
( $P=9e-04$ , Diff =  $-35.54$ )  
dorsolateral prefrontal cortex

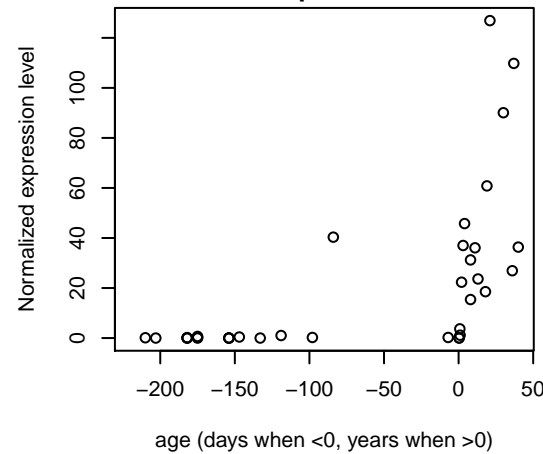

**CNDP1\_72251731\_72252261**  
( $P=4e-04$ , Diff =  $-24.22$ )  
dorsolateral prefrontal cortex

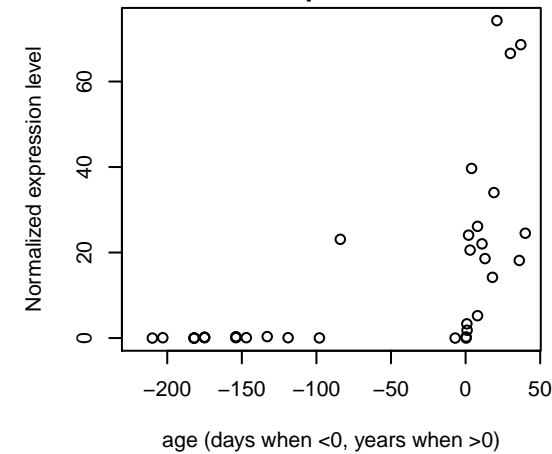



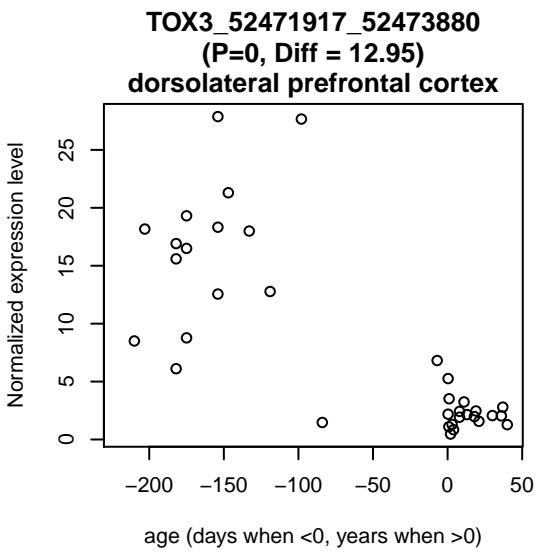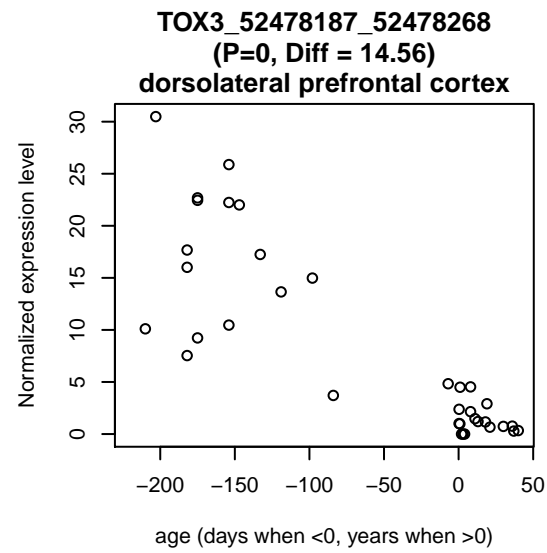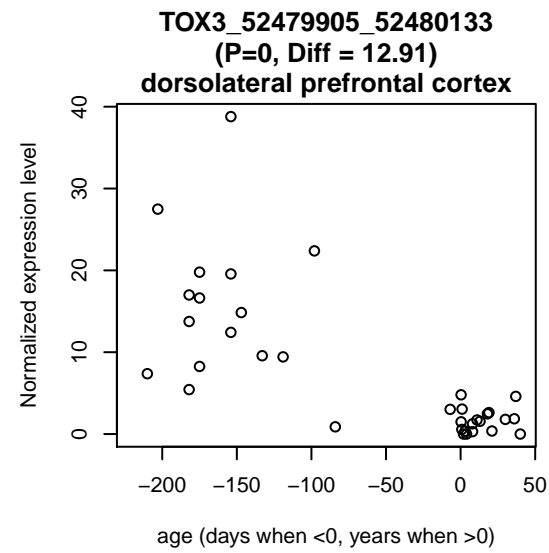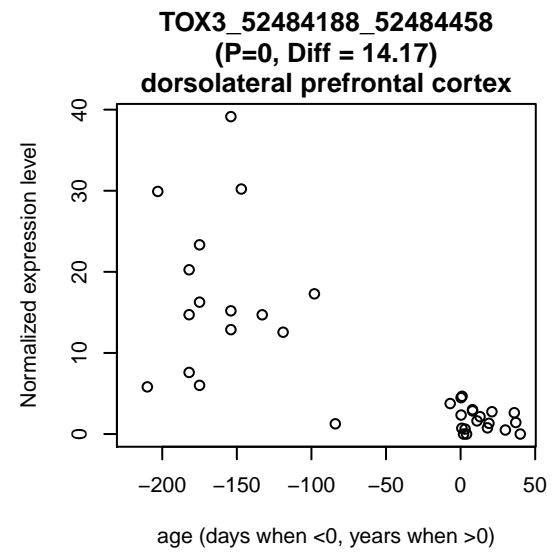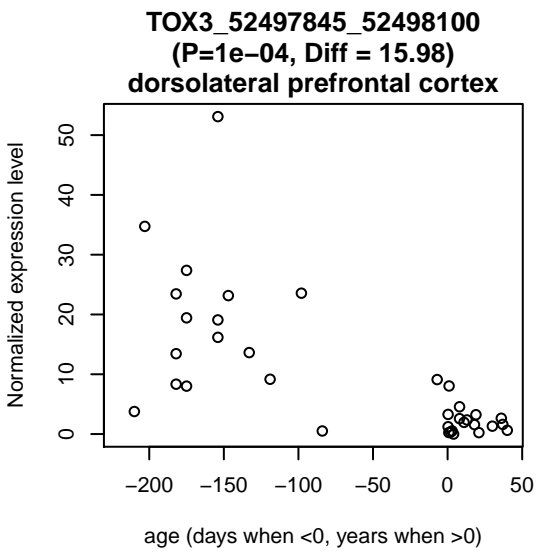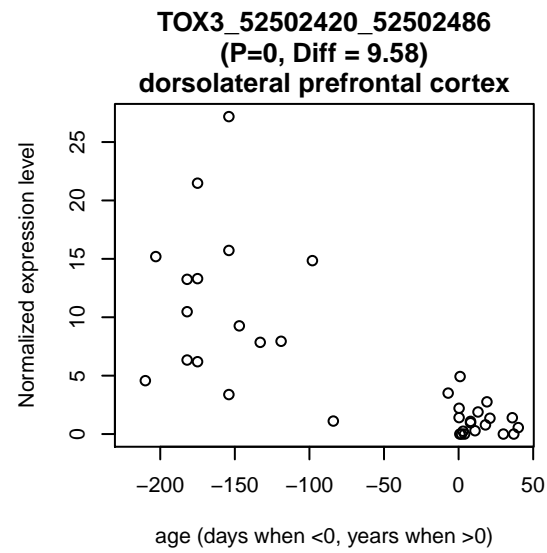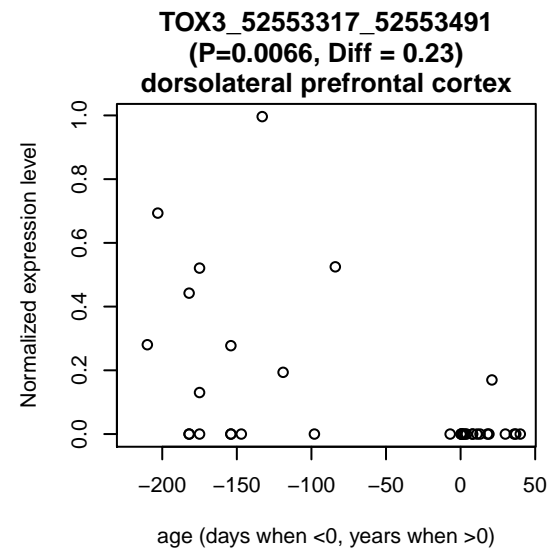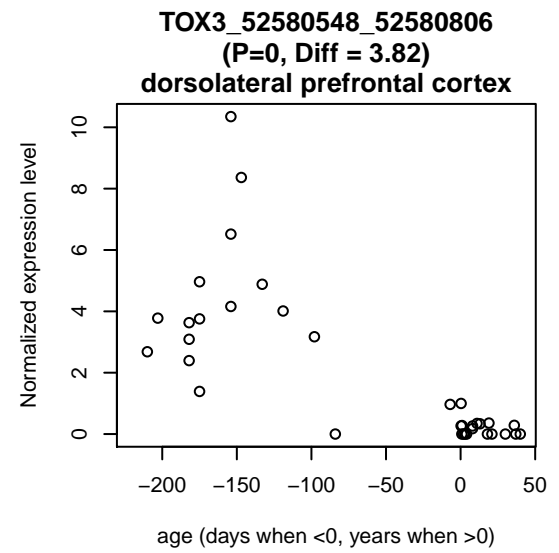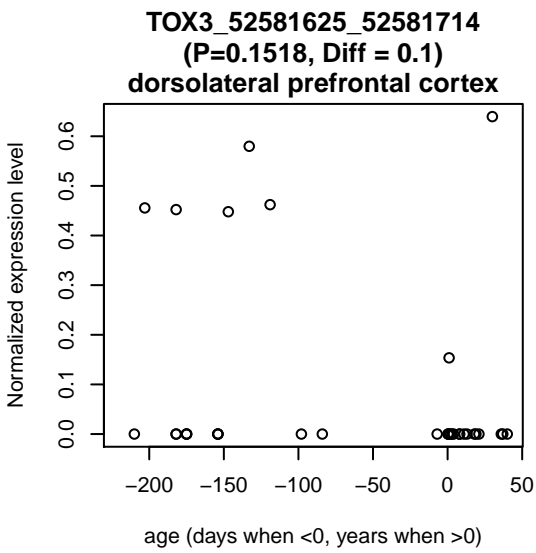

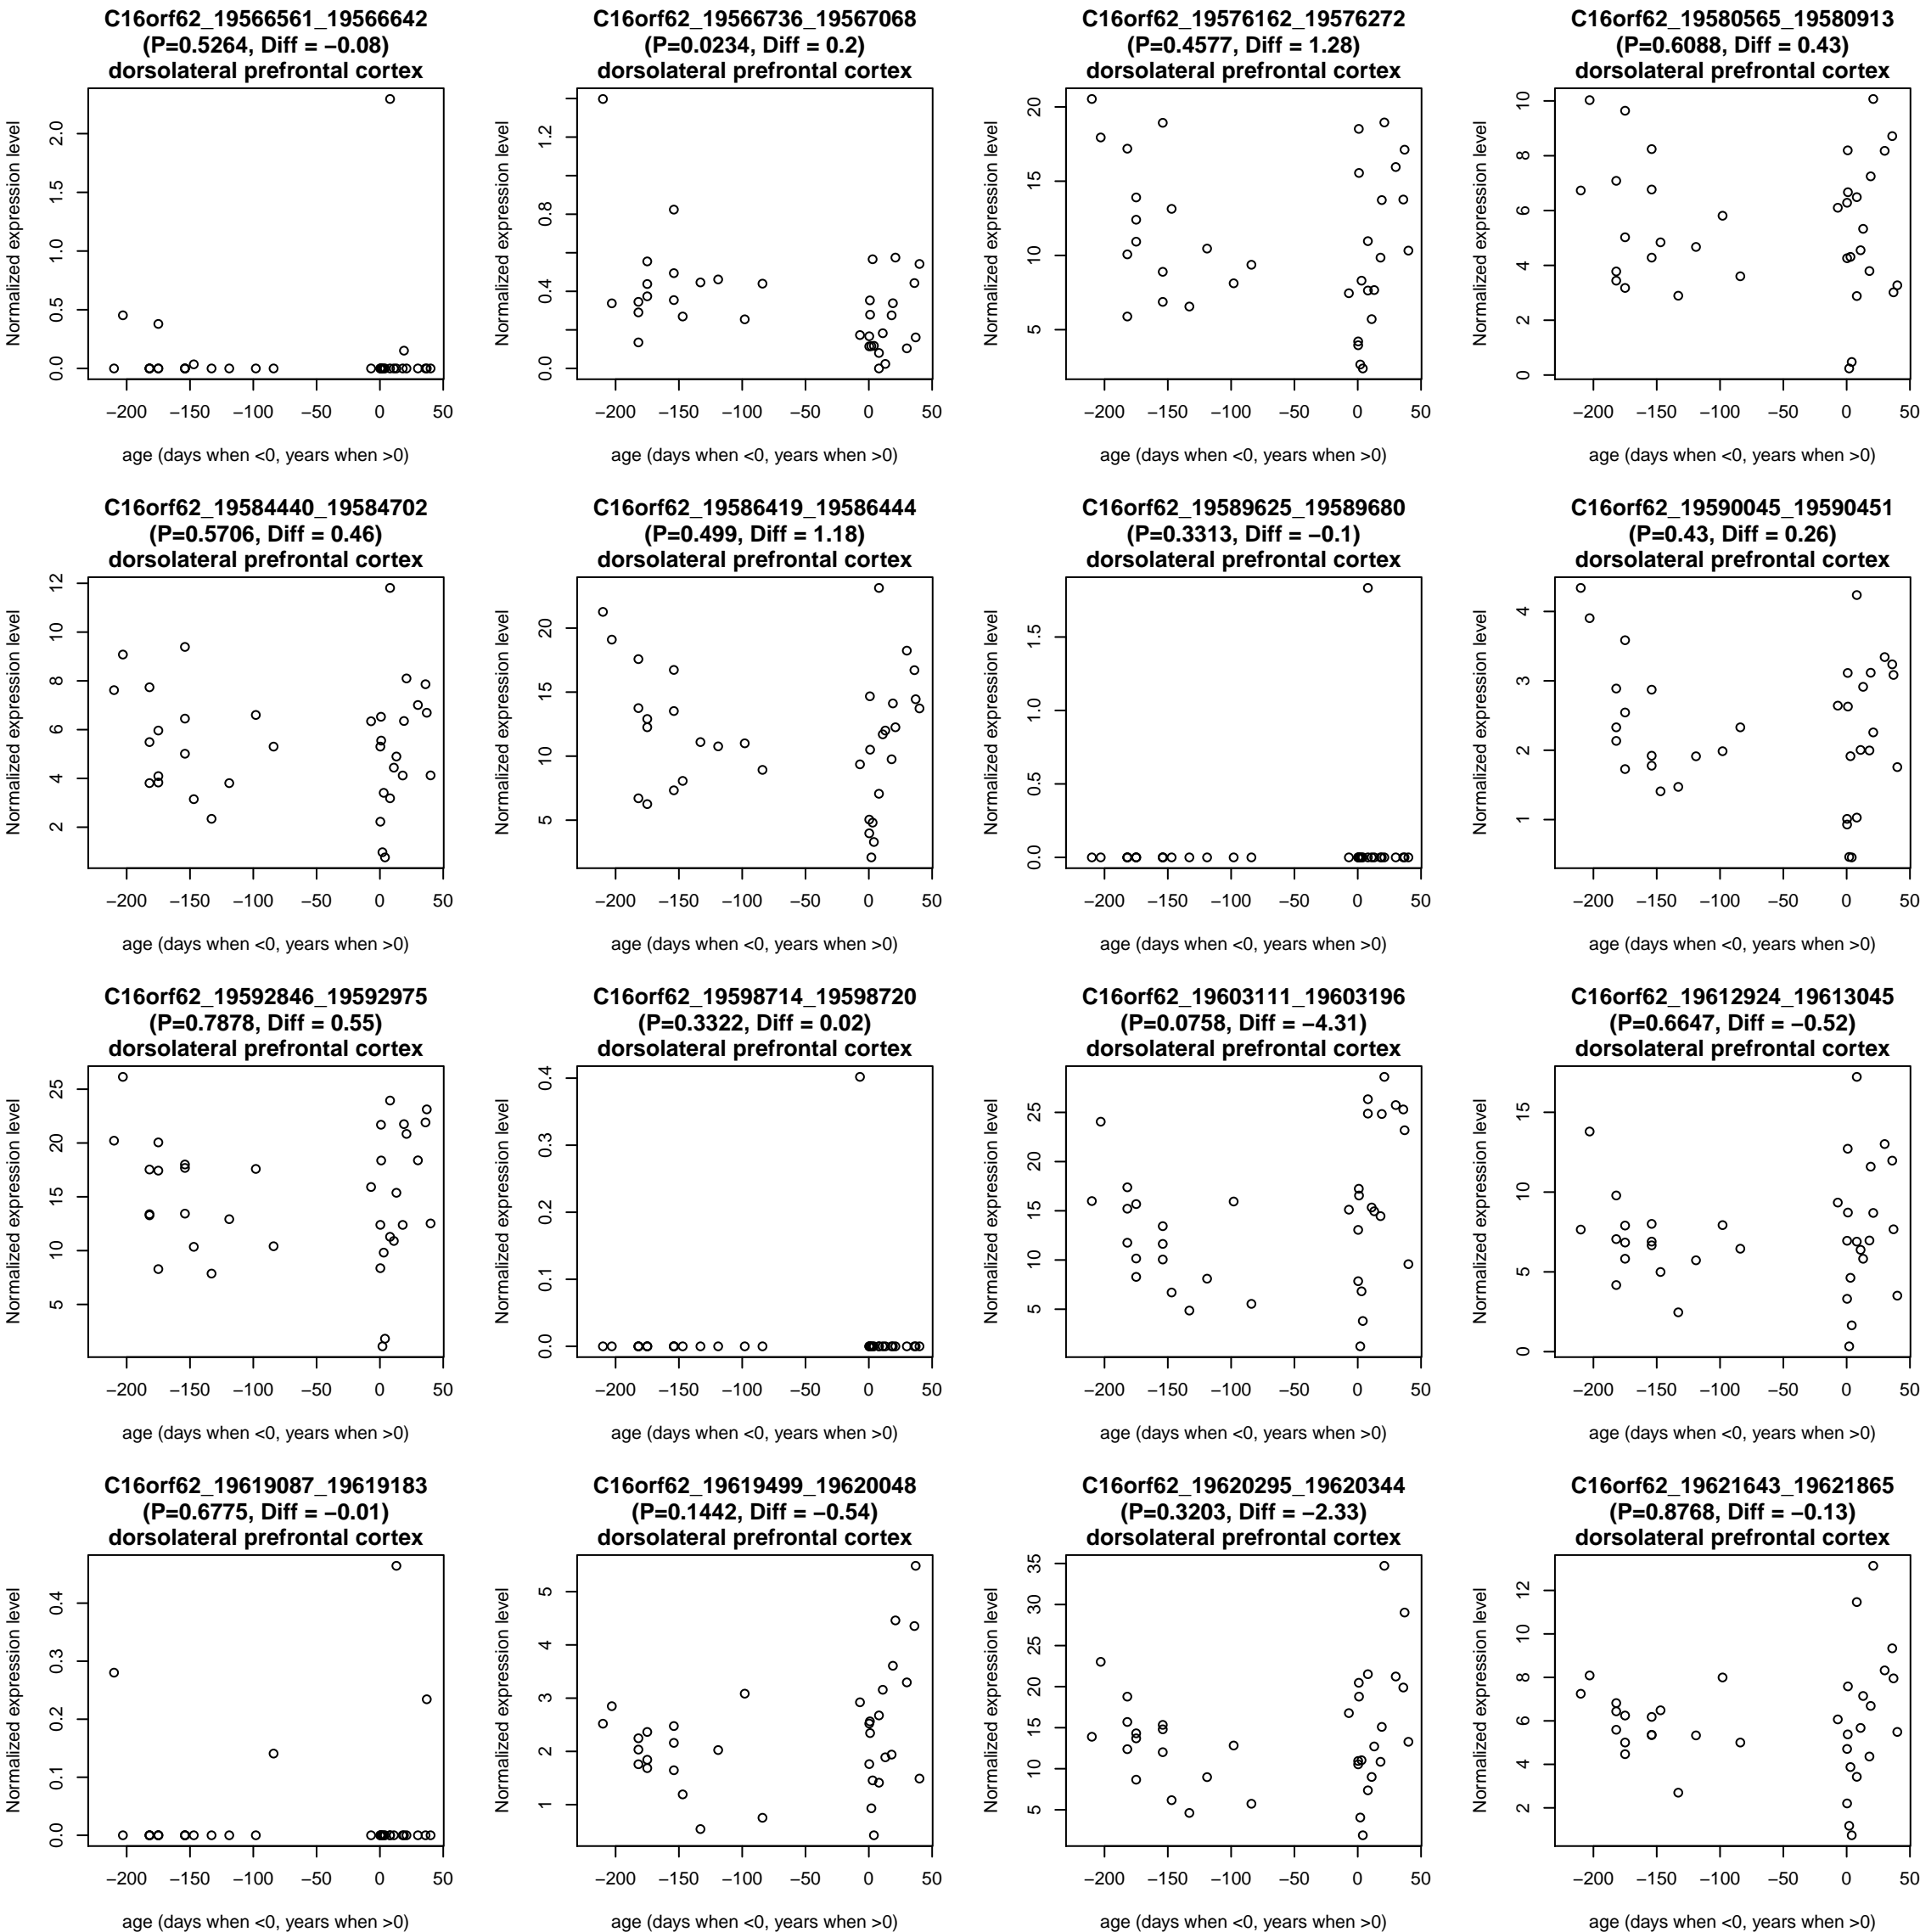

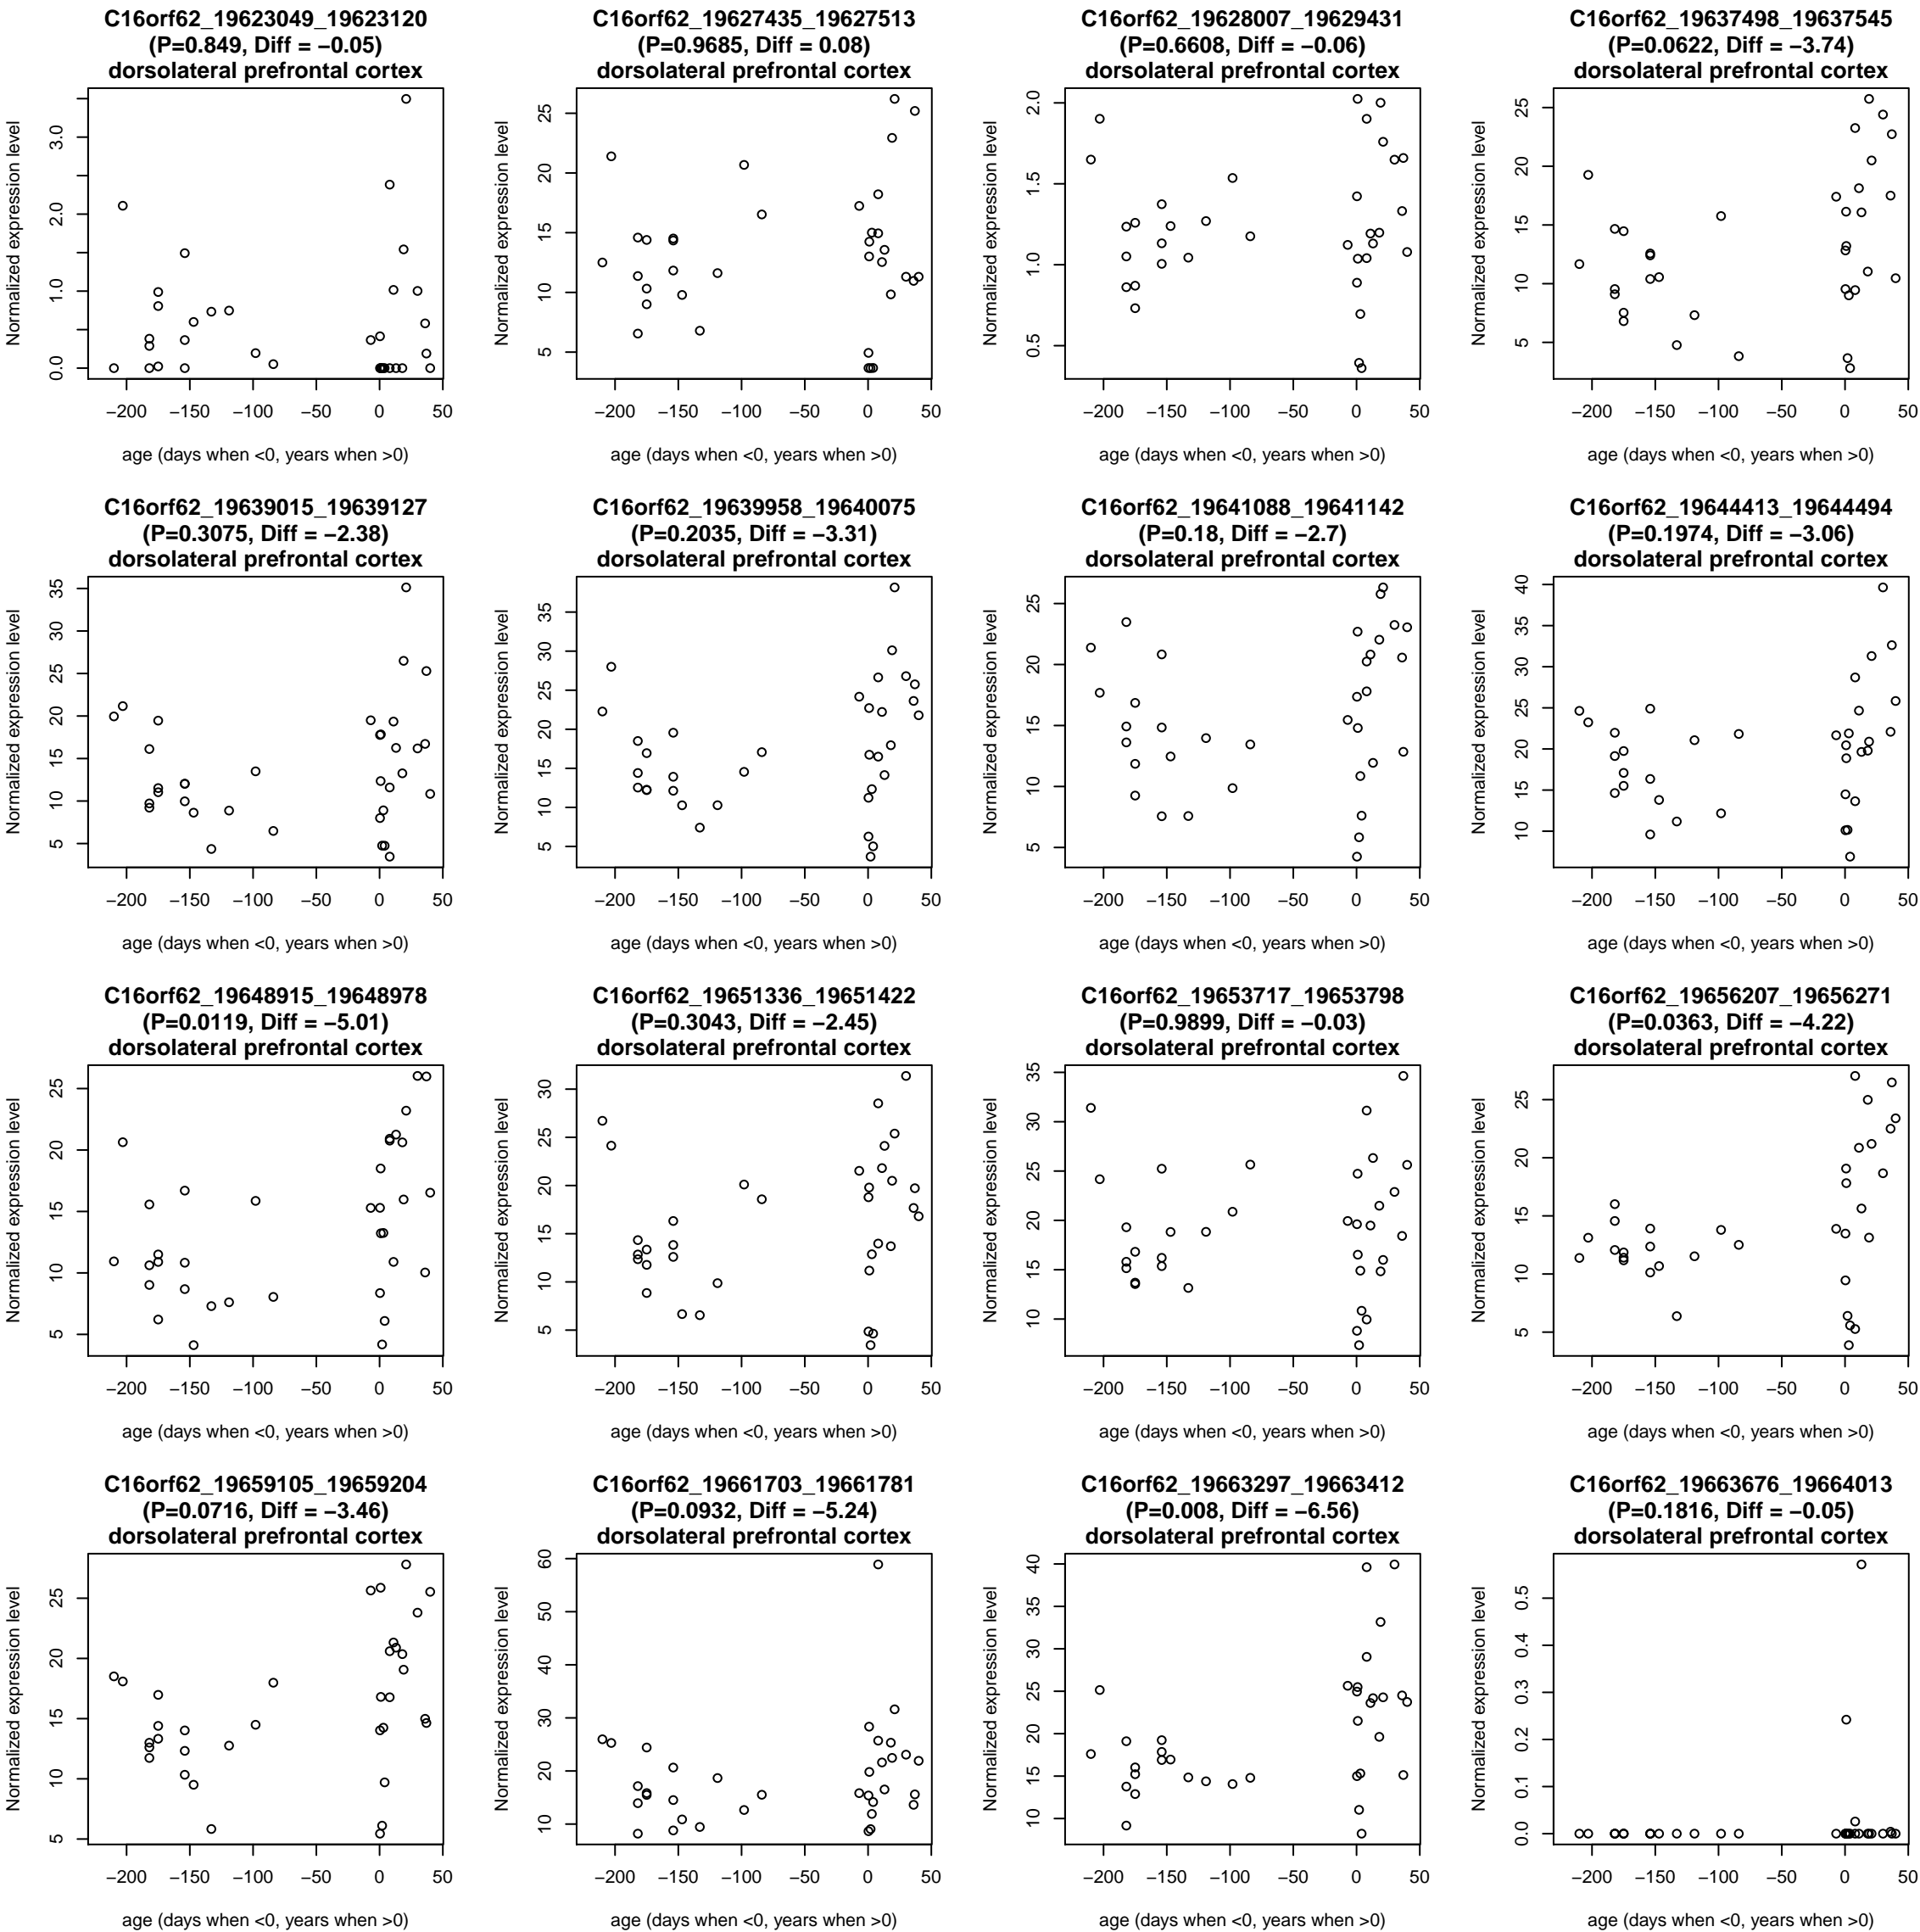

**C16orf62\_19680481\_19680621**  
(P=0.0101, Diff = -5.99)  
dorsolateral prefrontal cortex

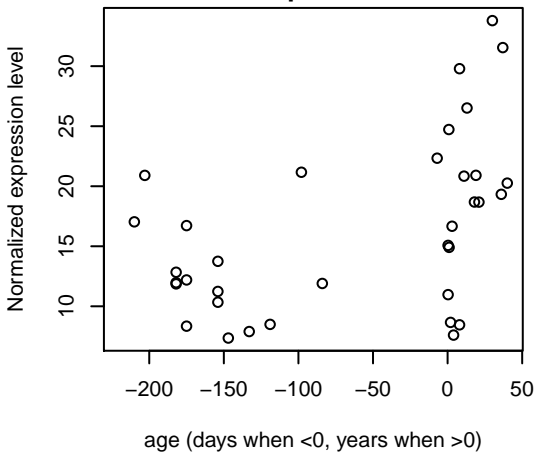

**C16orf62\_19693546\_19693712**  
(P=0.0026, Diff = -6.8)  
dorsolateral prefrontal cortex

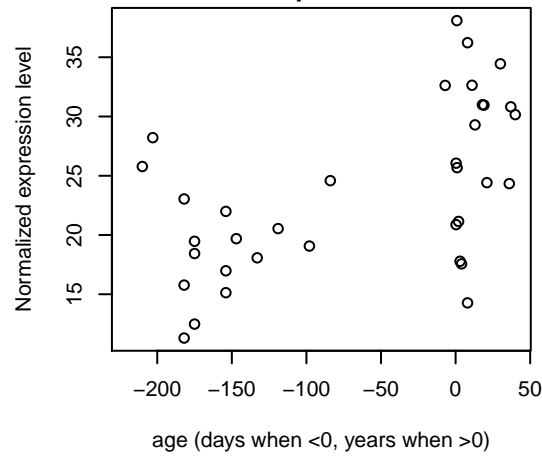

**C16orf62\_19702674\_19702793**  
(P=0.0206, Diff = -5.64)  
dorsolateral prefrontal cortex

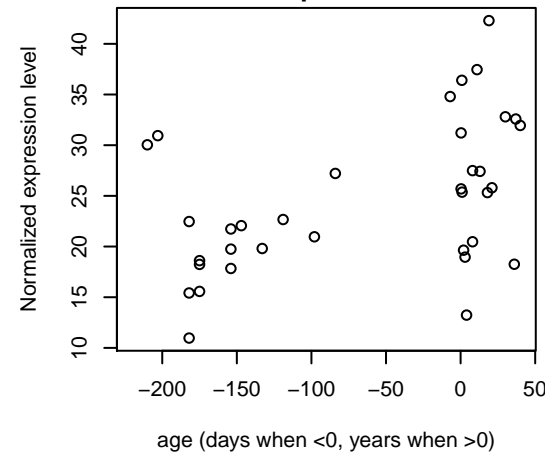

**C16orf62\_19710823\_19710970**  
(P=0.0106, Diff = -8.22)  
dorsolateral prefrontal cortex

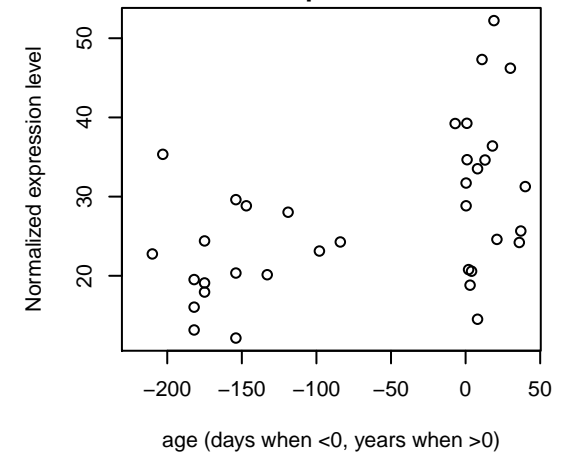

**C16orf62\_19711699\_19712448**  
(P=0.0023, Diff = -3.35)  
dorsolateral prefrontal cortex

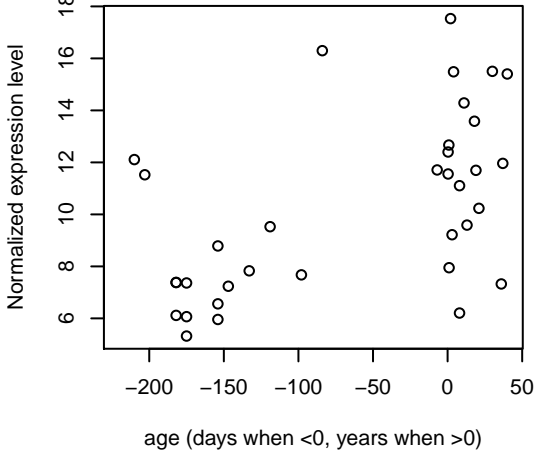

**C16orf62\_19716437\_19716880**  
(P=0.0287, Diff = 1)  
dorsolateral prefrontal cortex

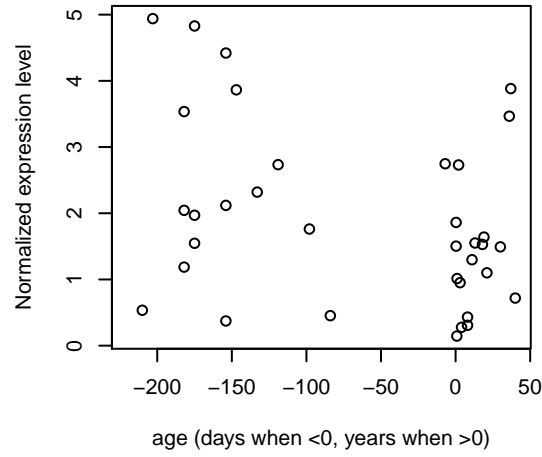

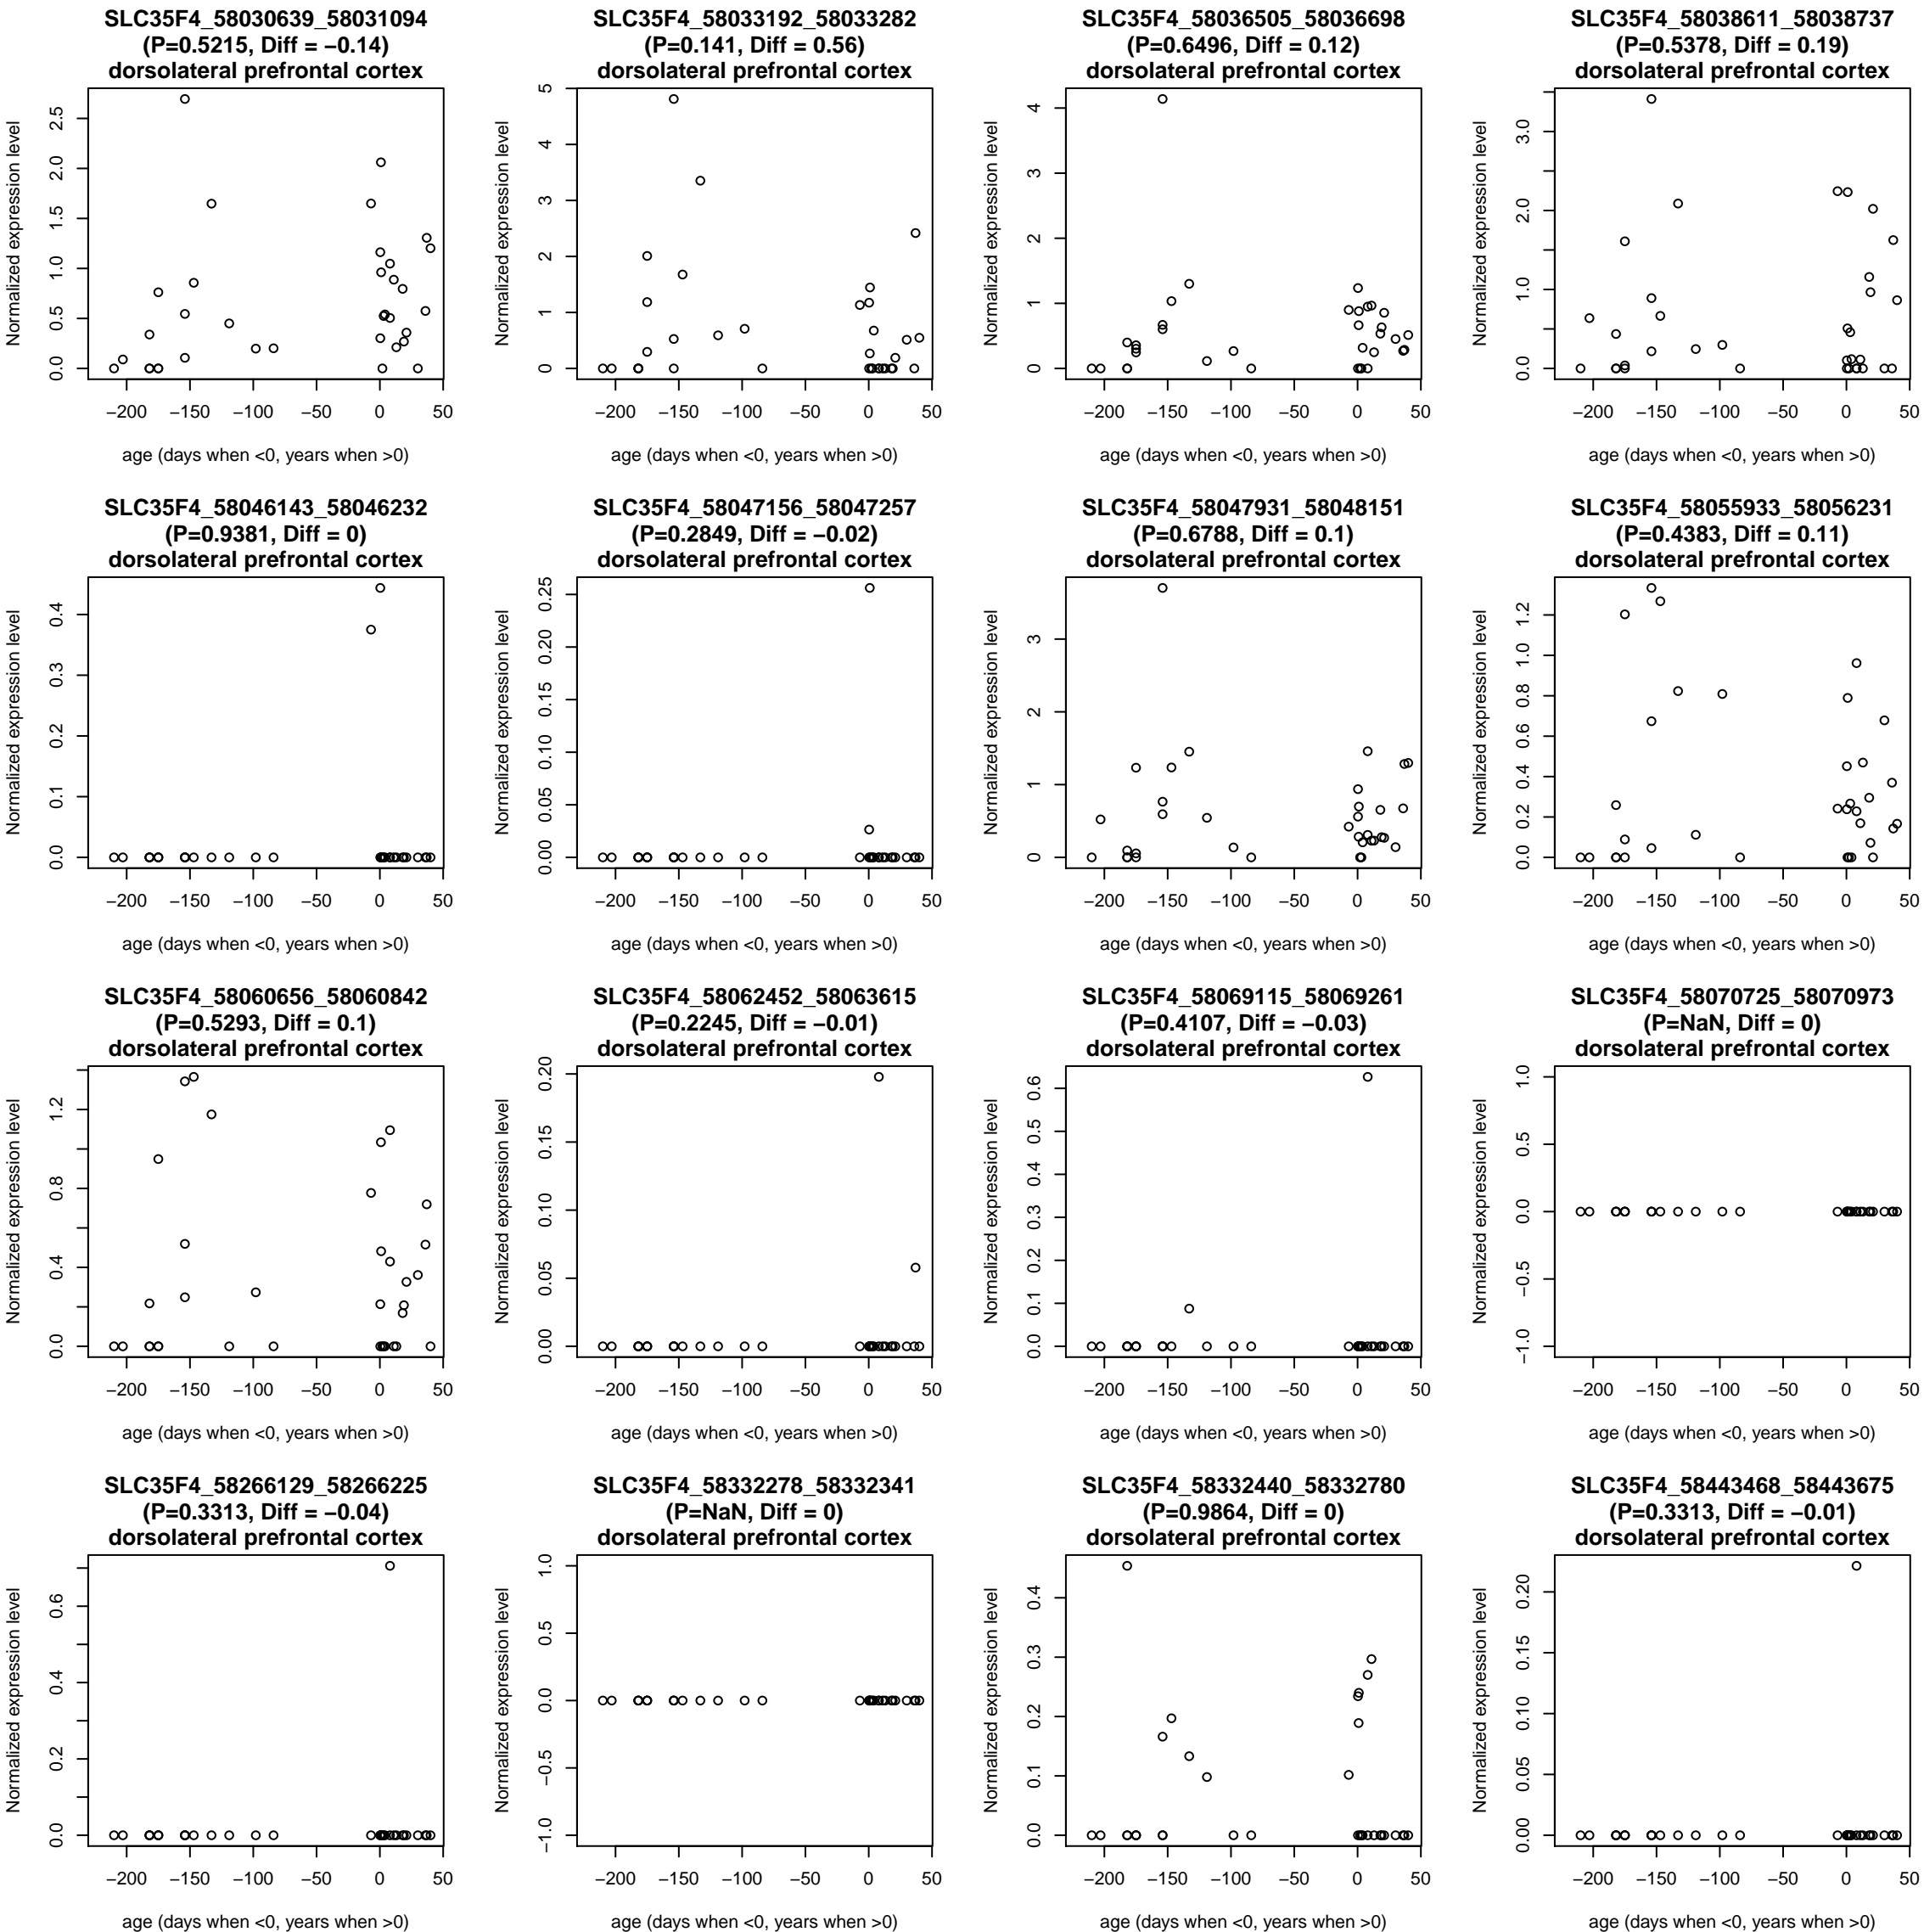

SLC35F4\_58448630\_58448912  
(P=NaN, Diff = 0)  
dorsolateral prefrontal cortex

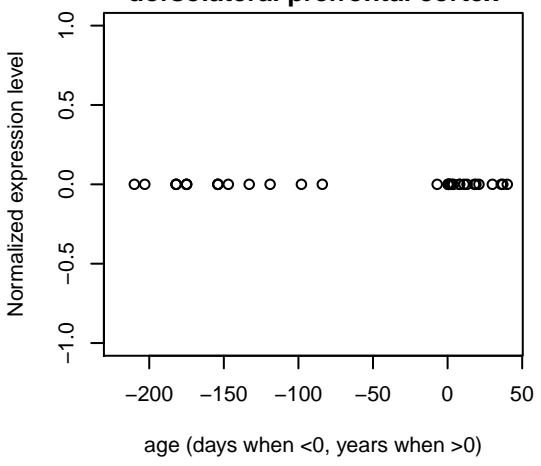

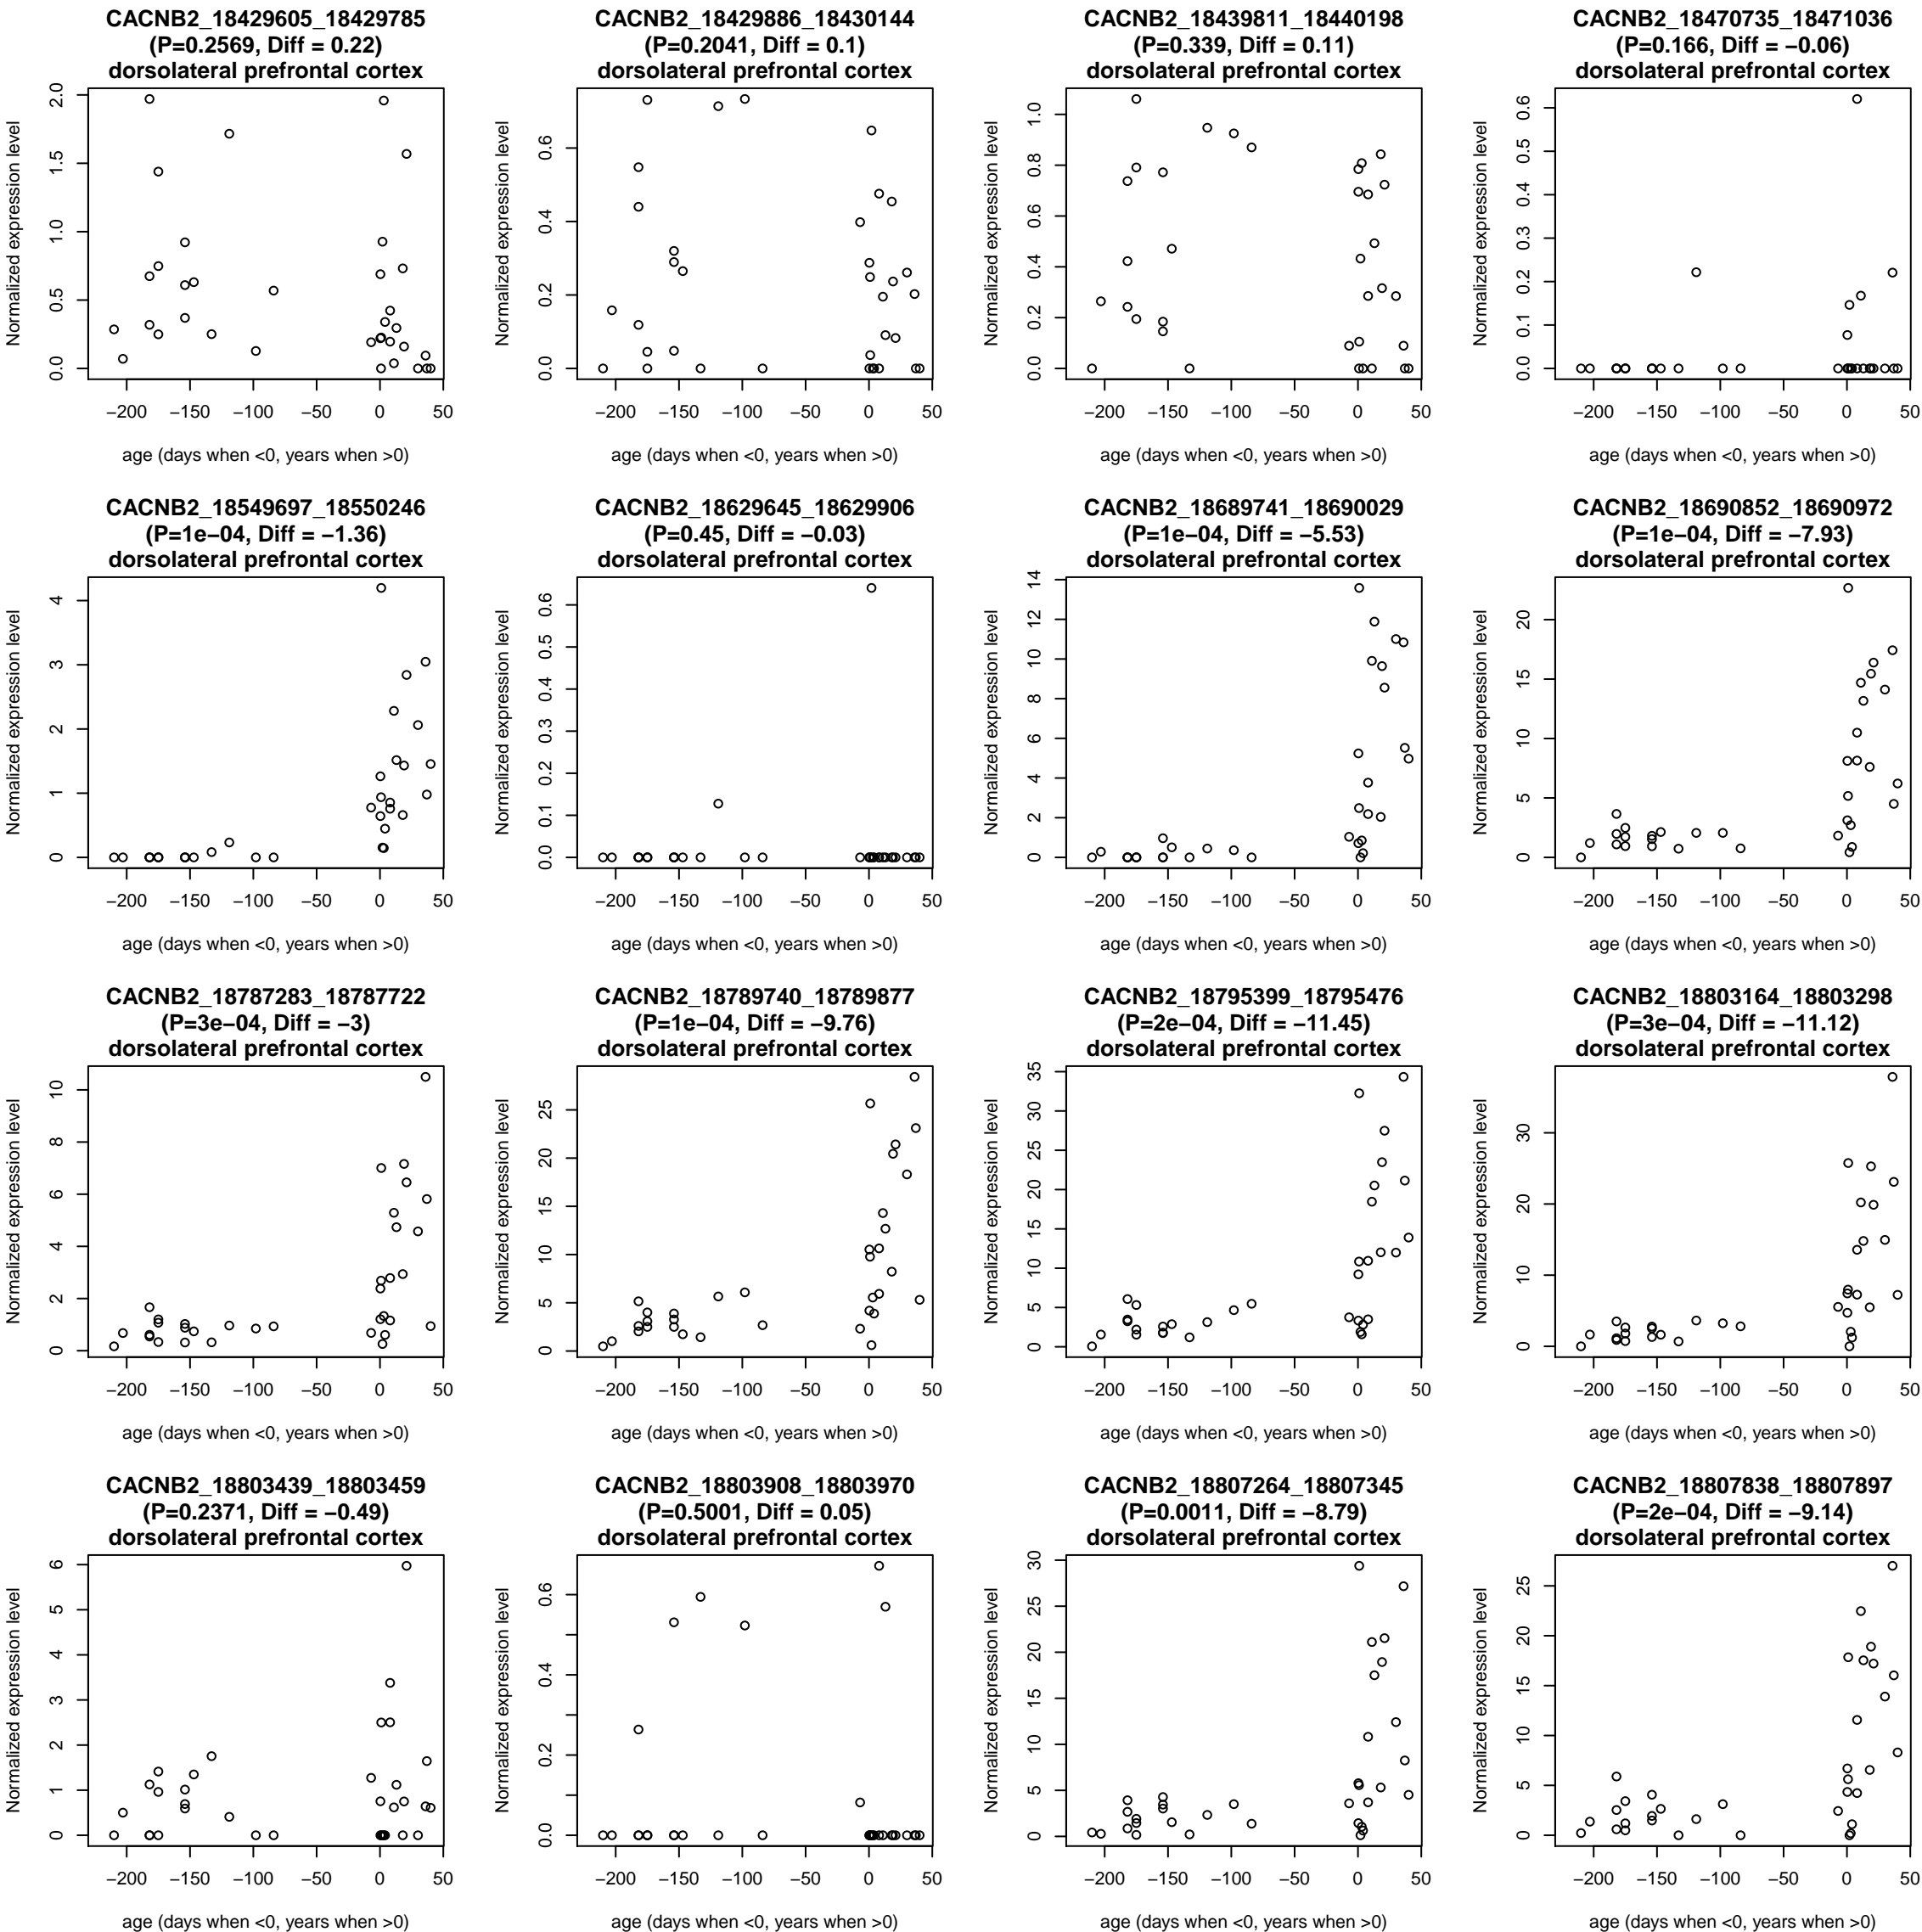

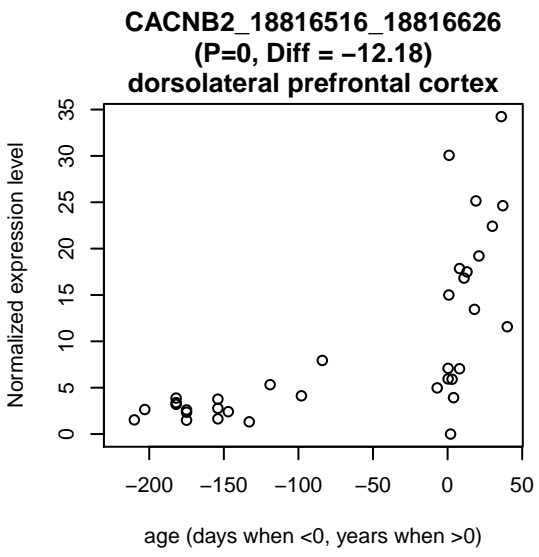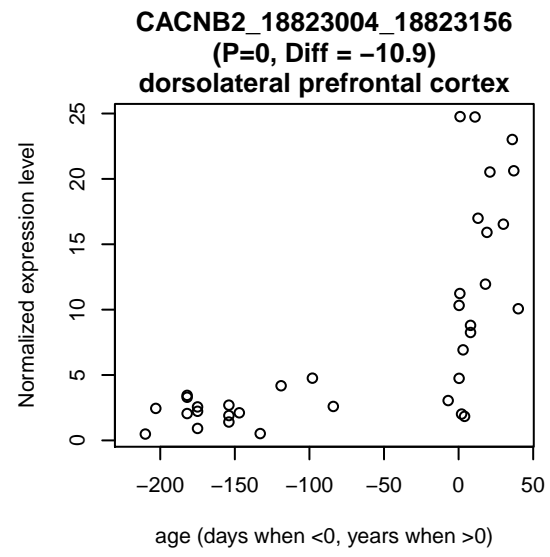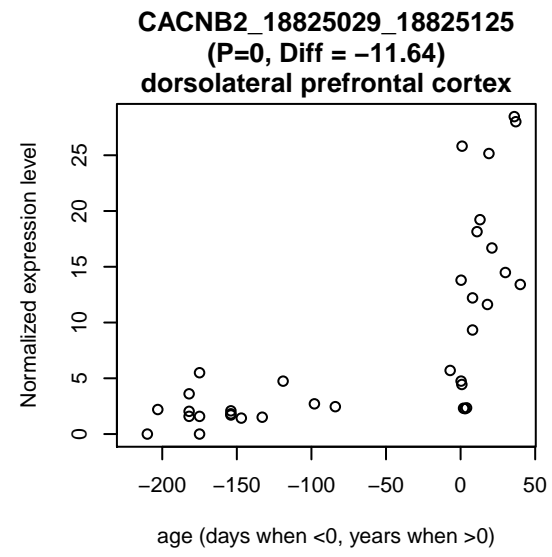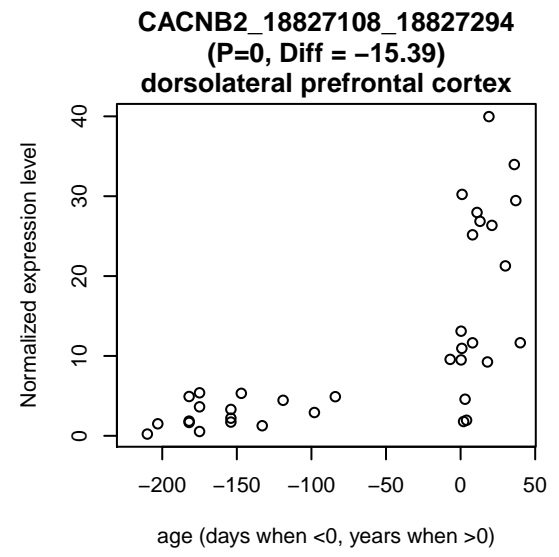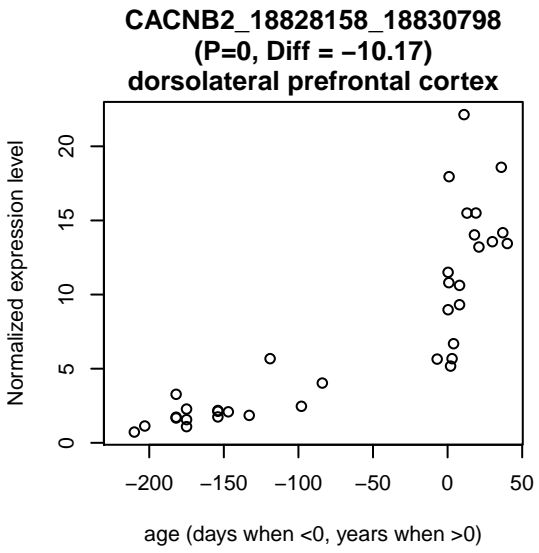



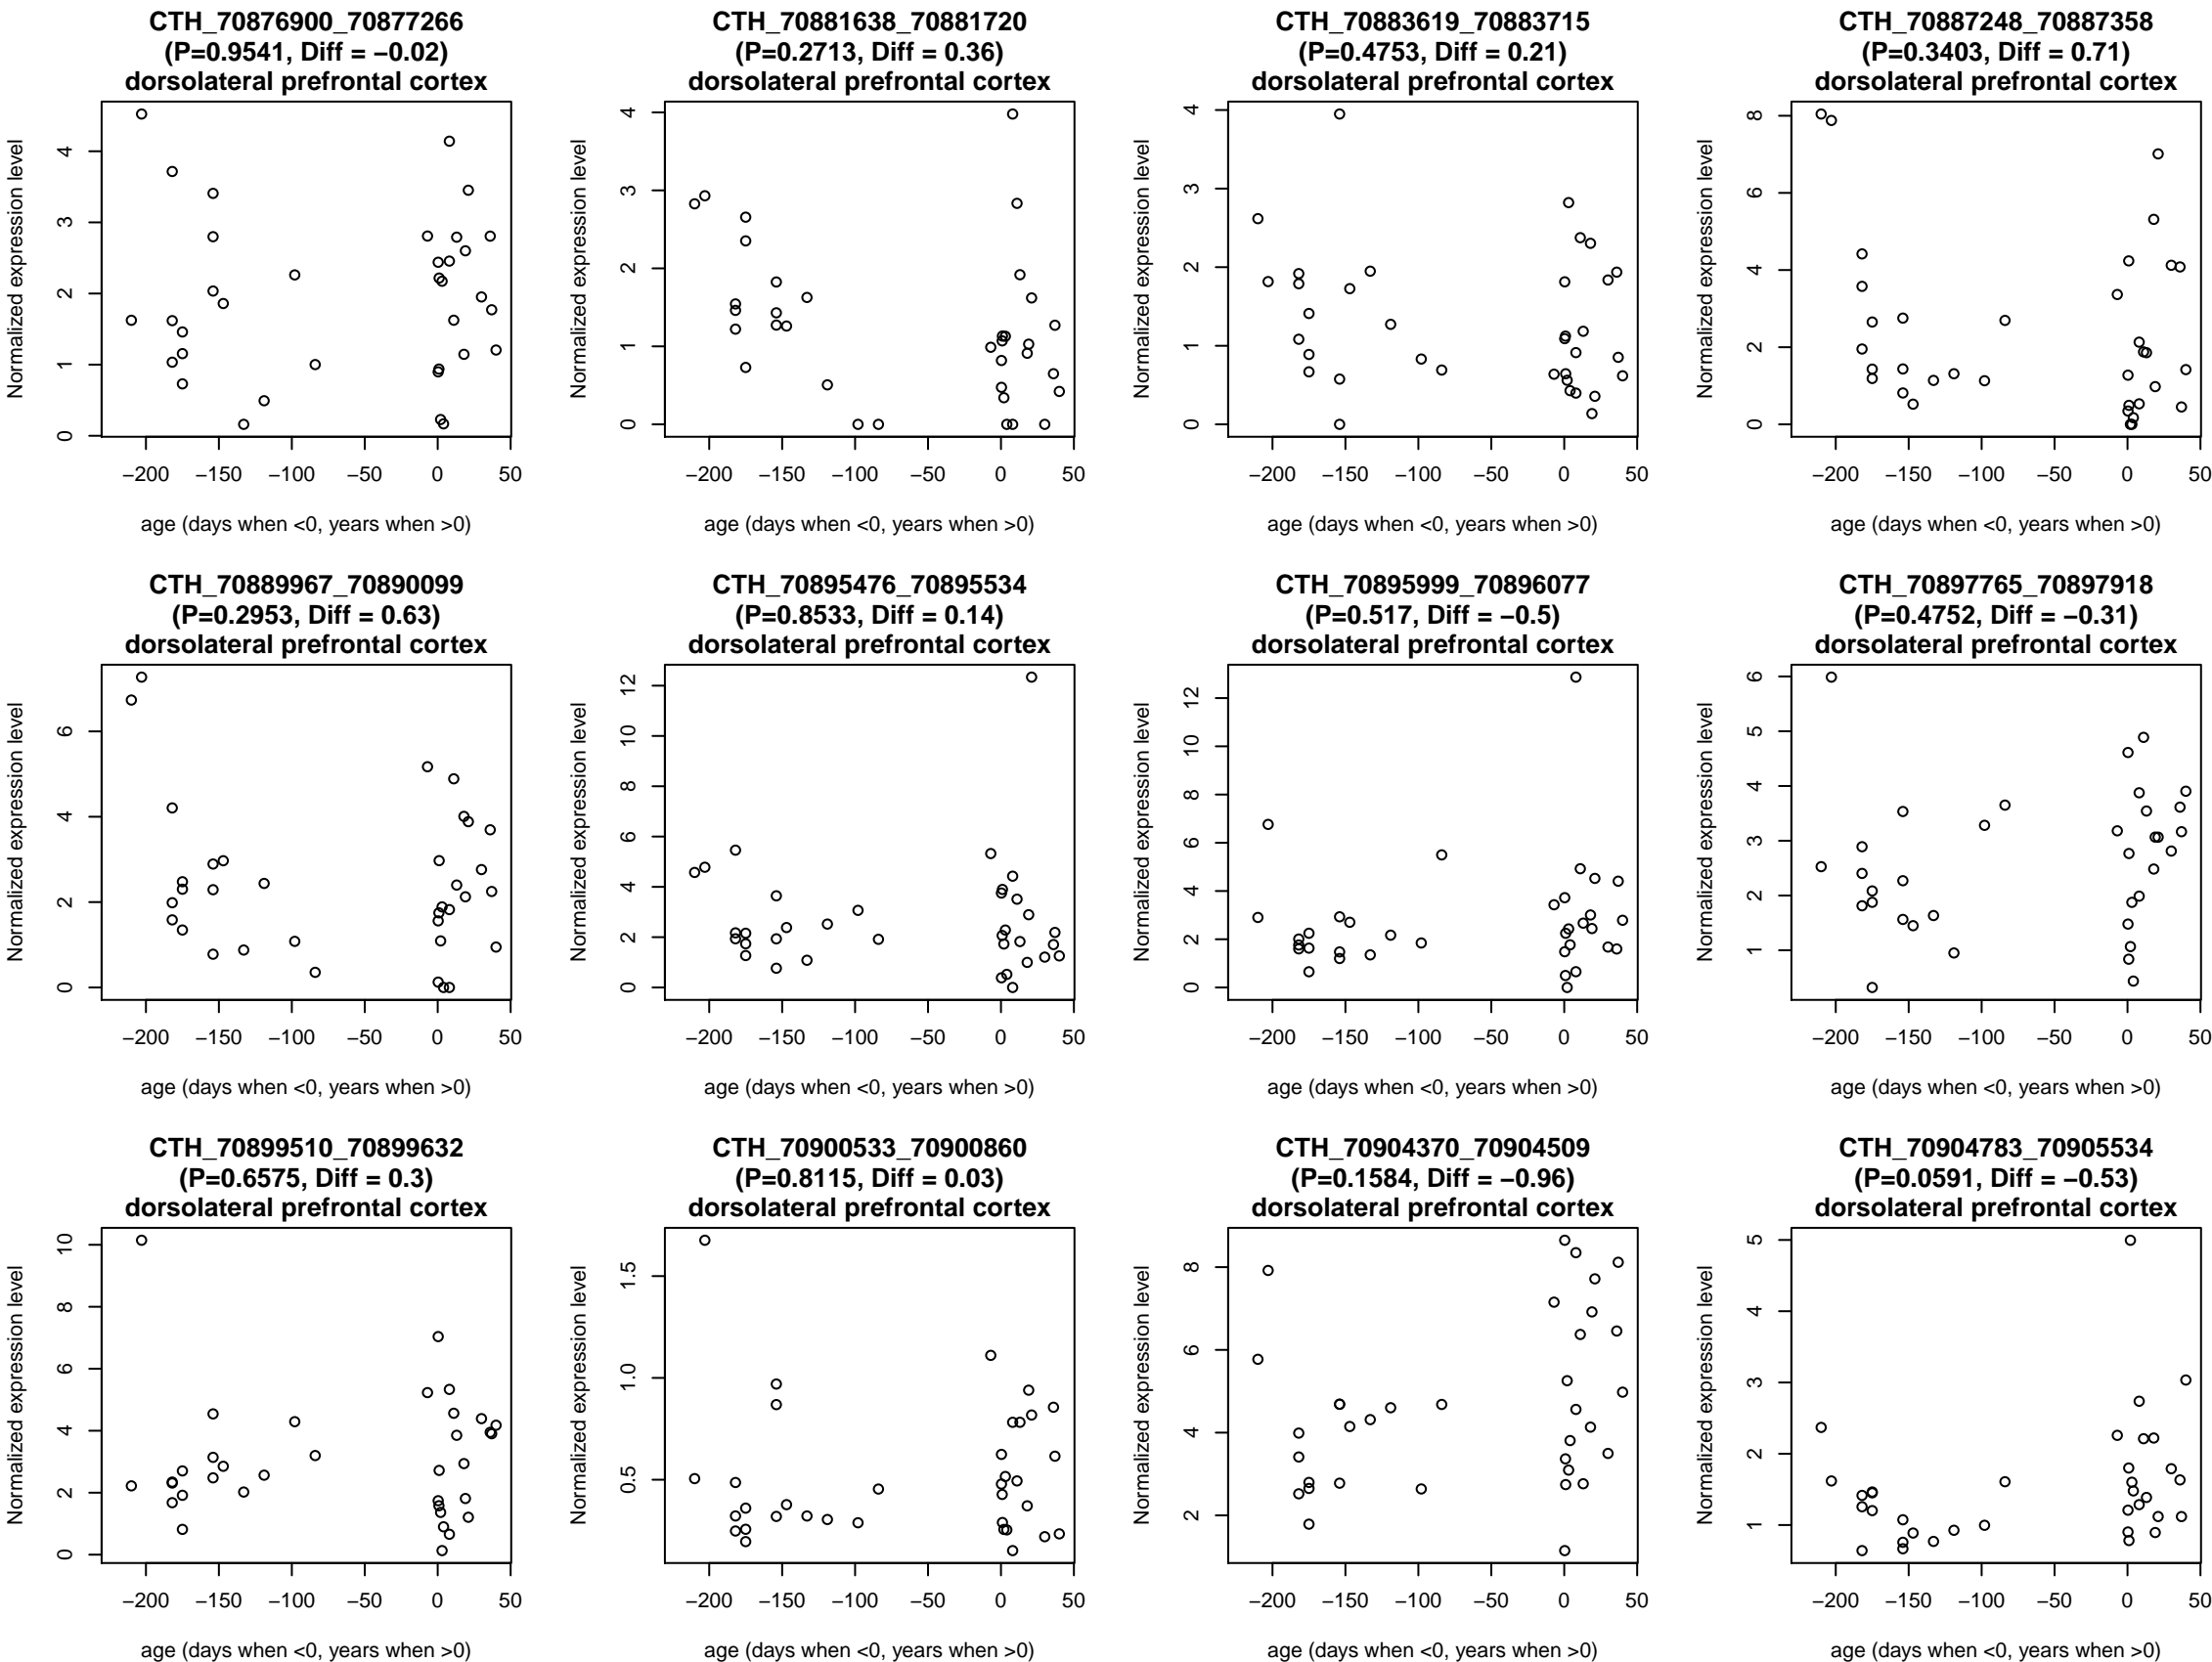

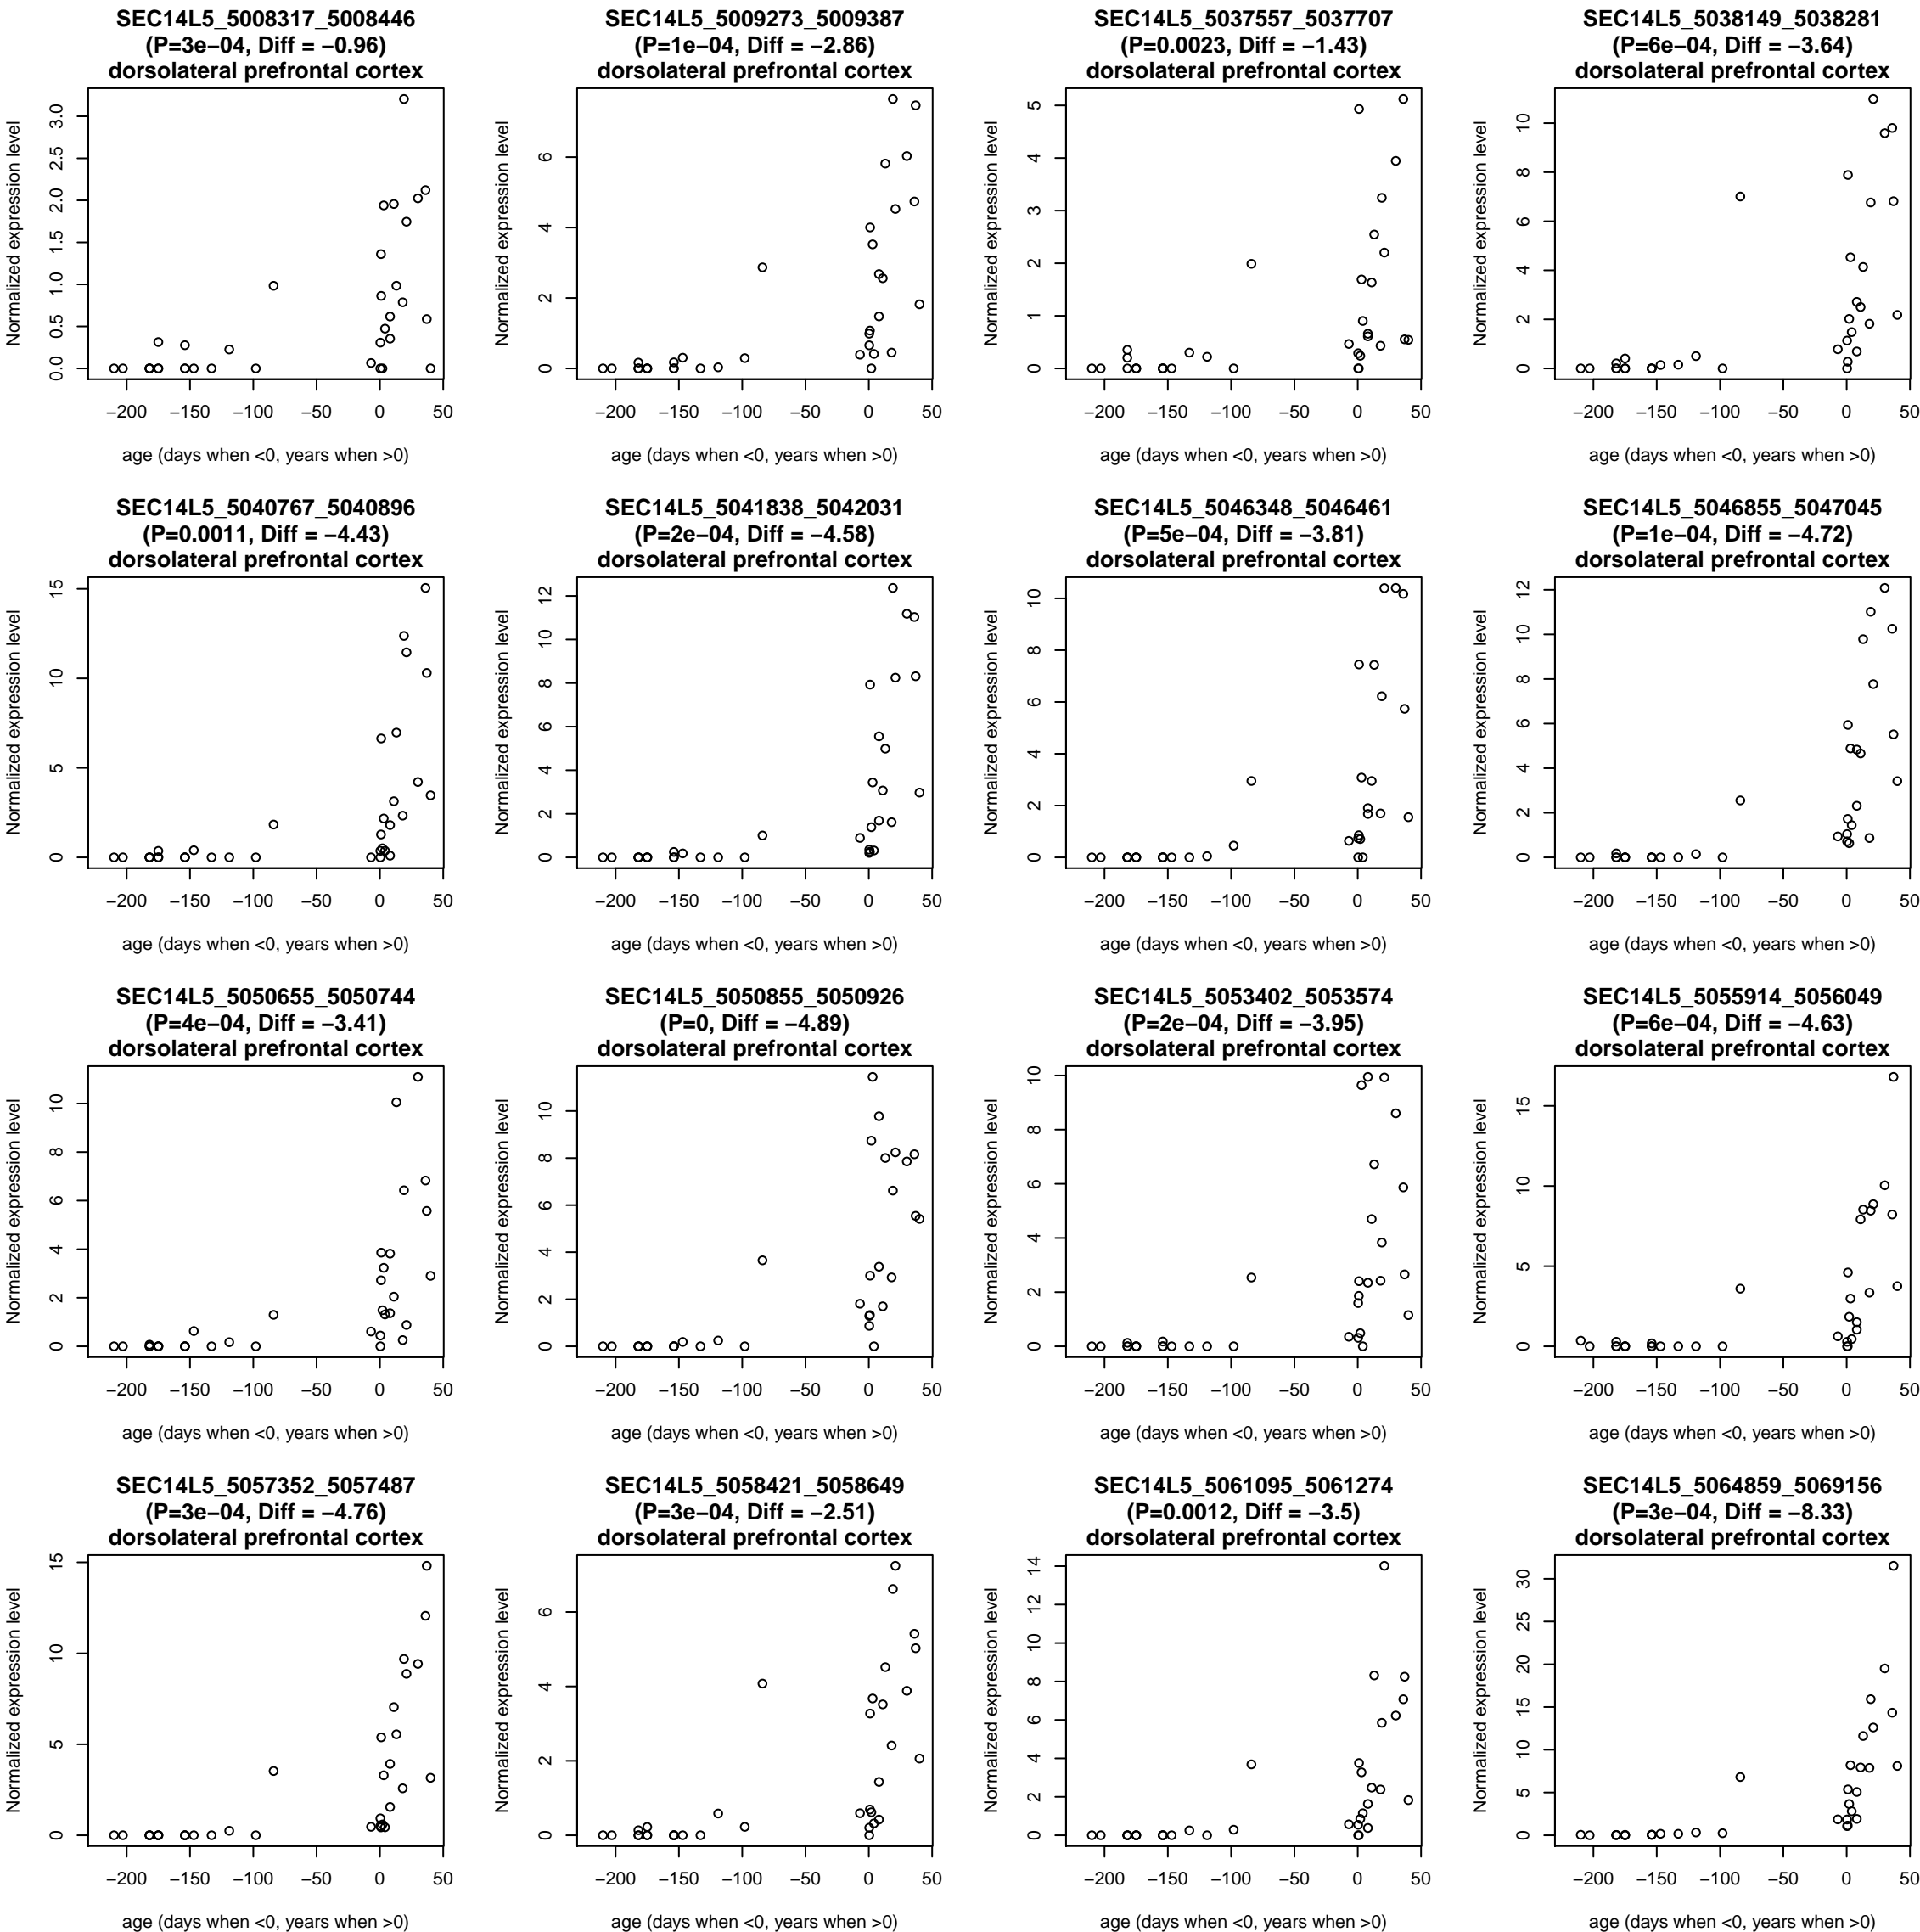

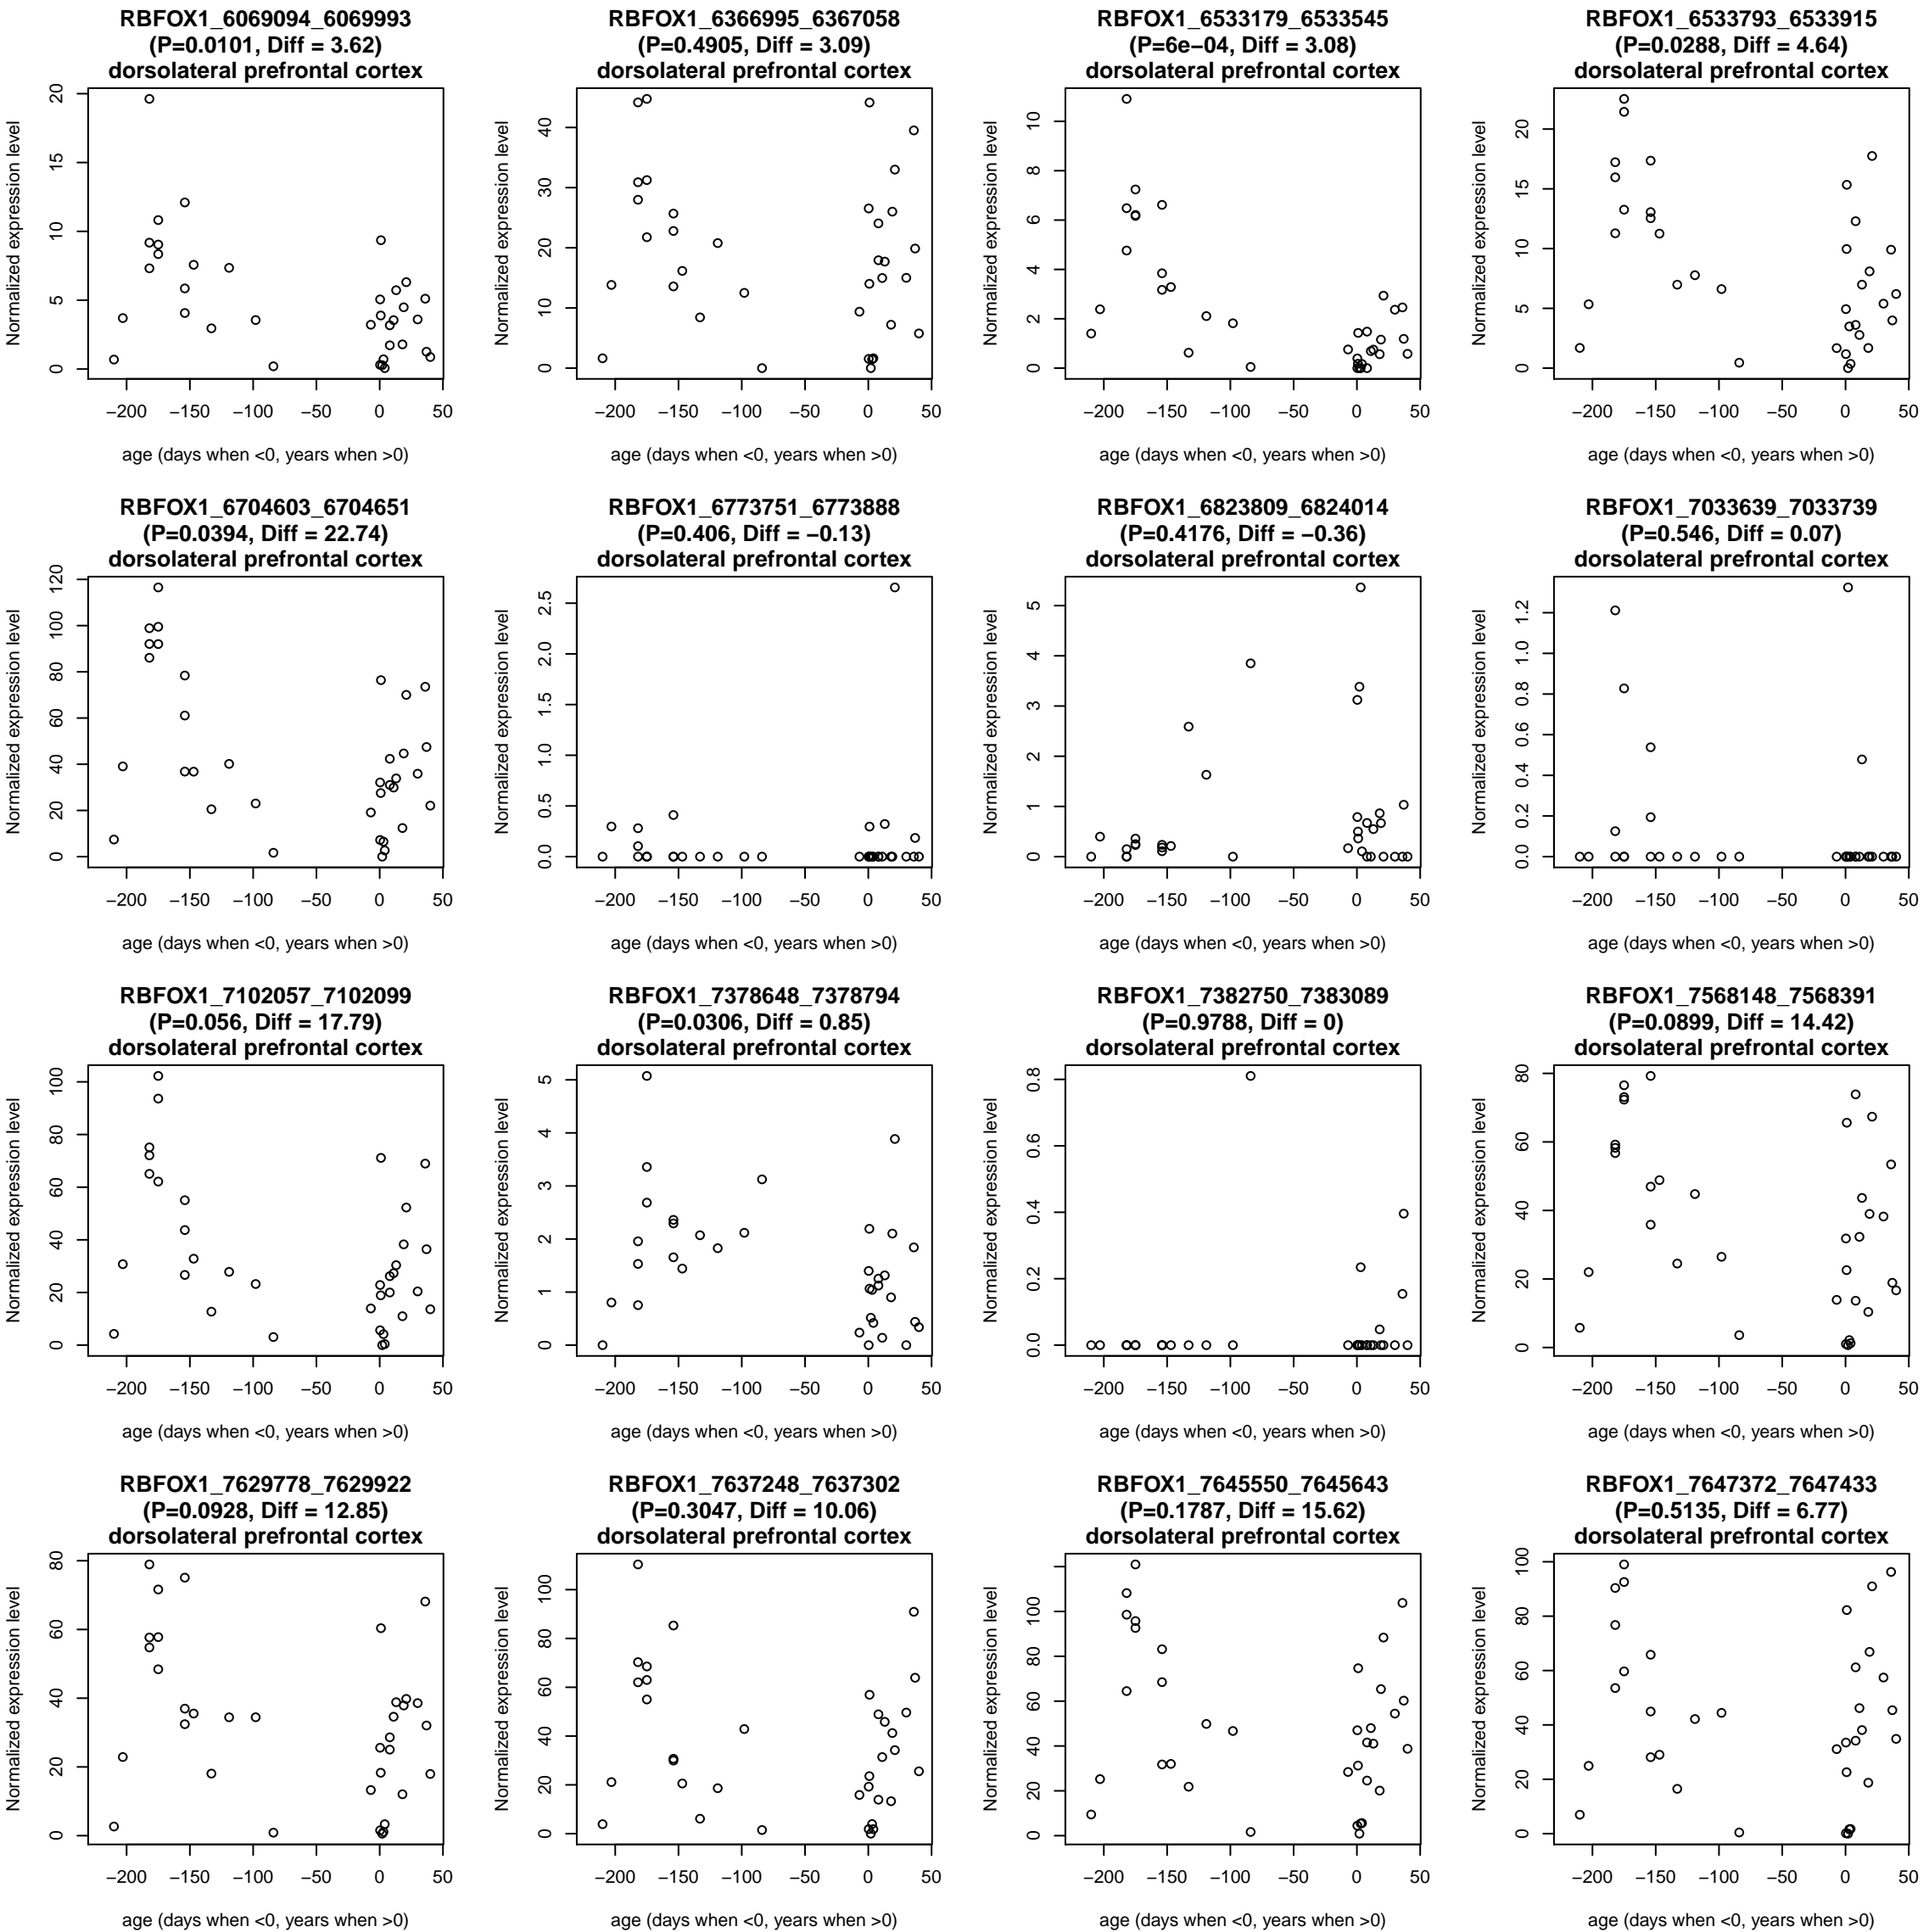

**RBFOX1\_7657286\_7657340**  
(P=0.9273, Diff = 1.21)  
dorsolateral prefrontal cortex

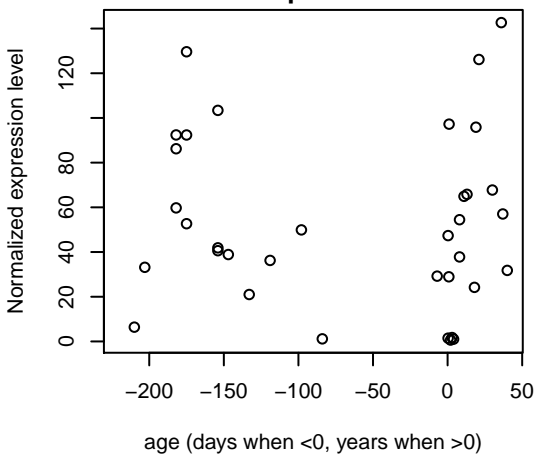

**RBFOX1\_7680604\_7680685**  
(P=0.4825, Diff = 7.82)  
dorsolateral prefrontal cortex

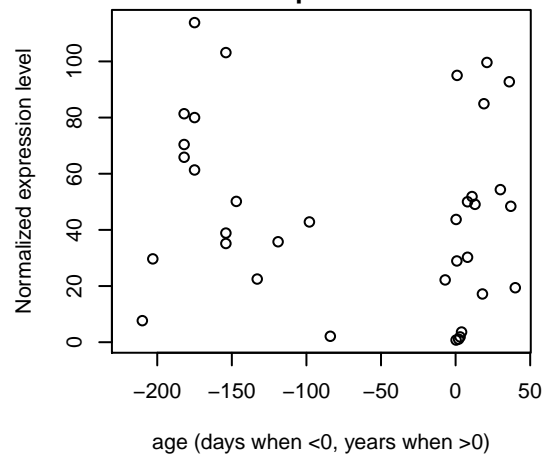

**RBFOX1\_7703816\_7703949**  
(P=0.1559, Diff = 9.2)  
dorsolateral prefrontal cortex

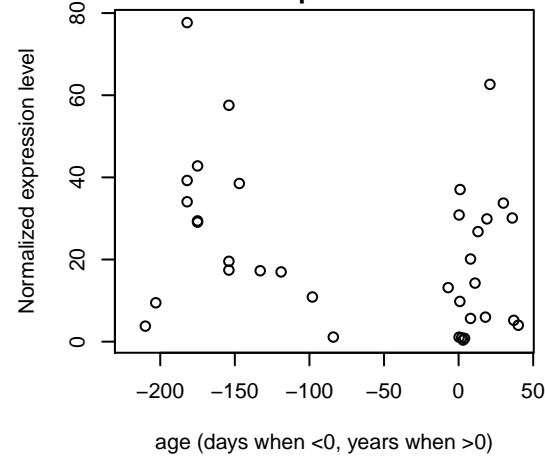

**RBFOX1\_7714930\_7714970**  
(P=0.7099, Diff = 2.93)  
dorsolateral prefrontal cortex

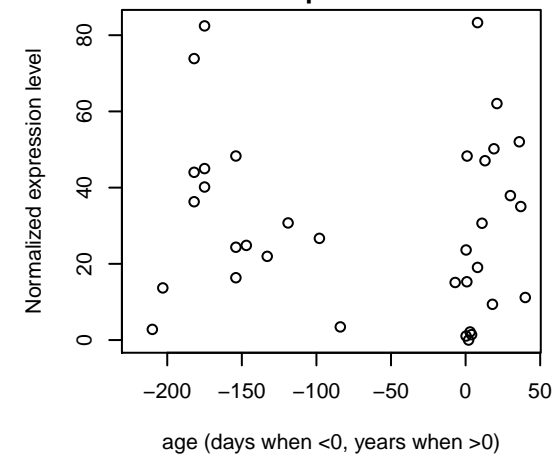

**RBFOX1\_7721558\_7721601**  
(P=0.9747, Diff = 0.01)  
dorsolateral prefrontal cortex

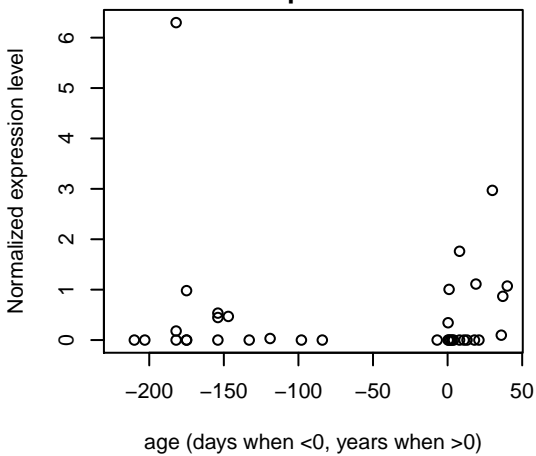

**RBFOX1\_7726775\_7726840**  
(P=0.4549, Diff = 8.34)  
dorsolateral prefrontal cortex

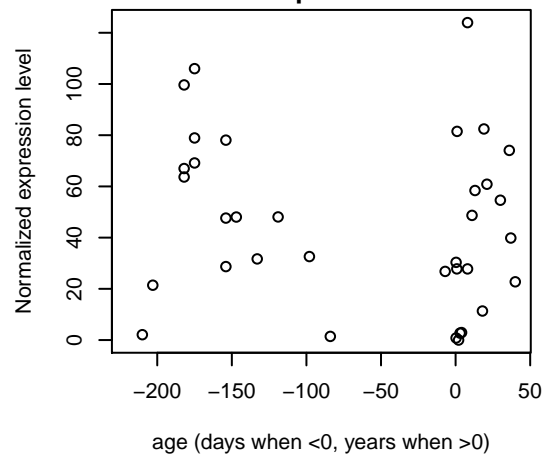

**RBFOX1\_7743316\_7743369**  
(P=0.7233, Diff = -1.78)  
dorsolateral prefrontal cortex

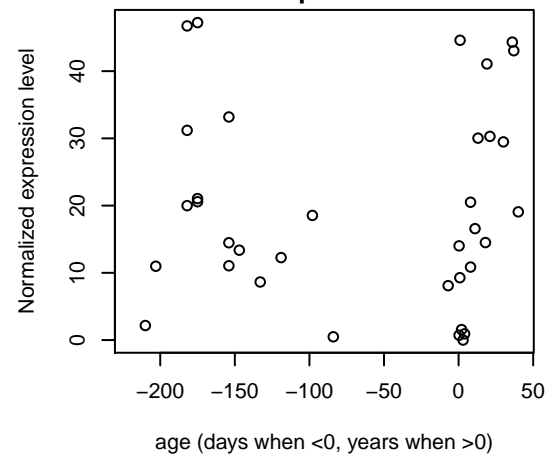

**RBFOX1\_7759057\_7759133**  
(P=0.4764, Diff = 8.34)  
dorsolateral prefrontal cortex

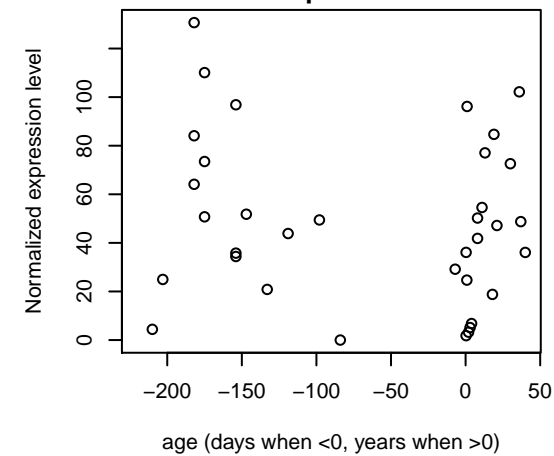

**RBFOX1\_7759495\_7763340**  
(P=0.7371, Diff = 2.33)  
dorsolateral prefrontal cortex

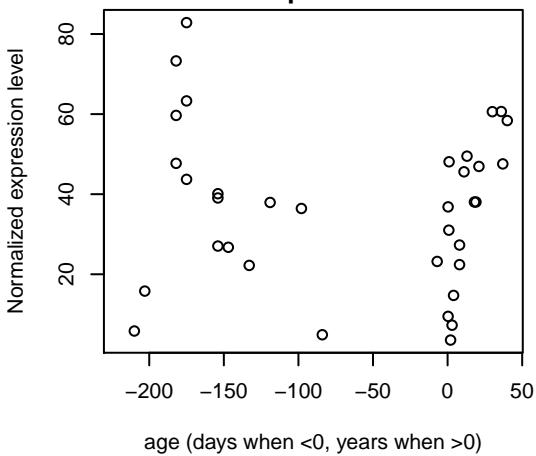

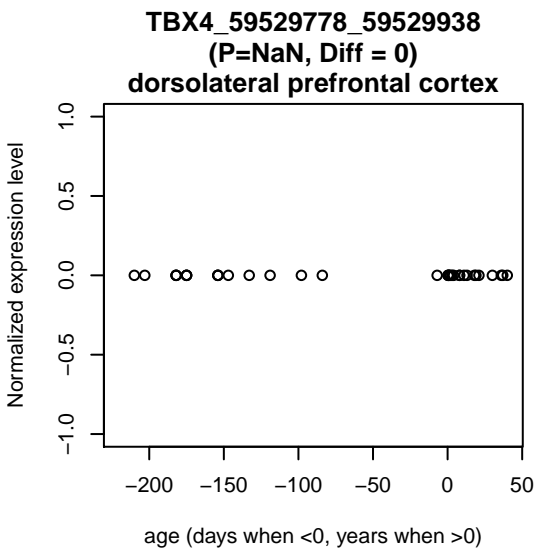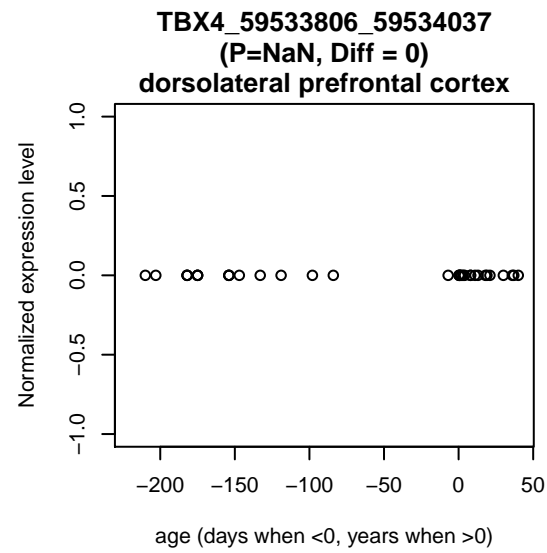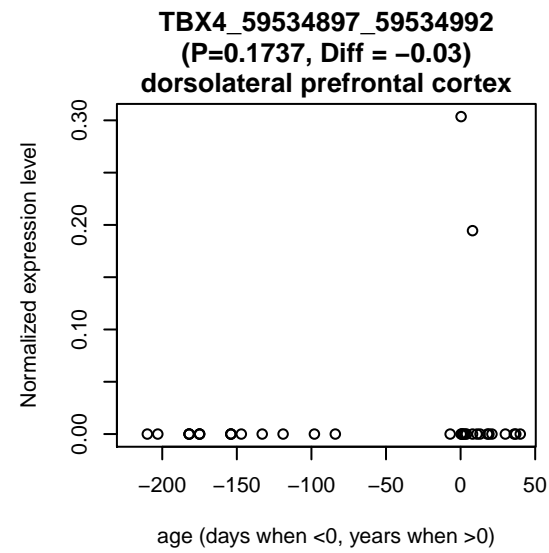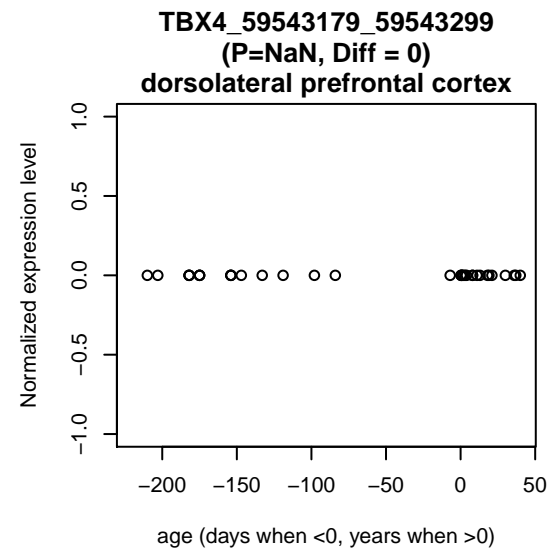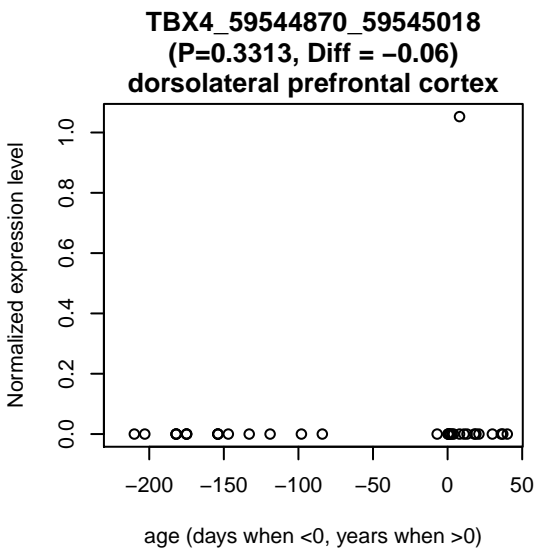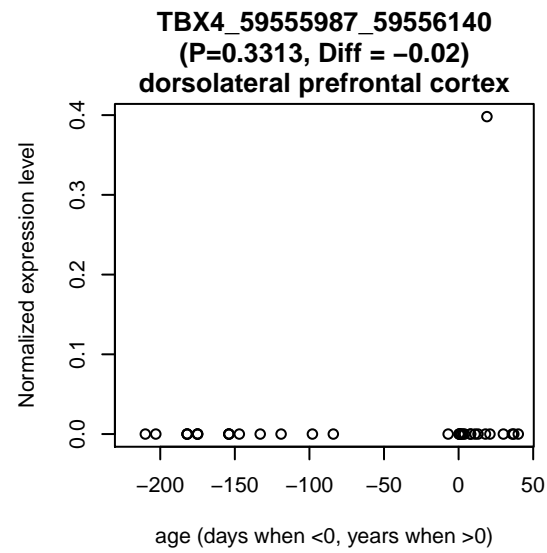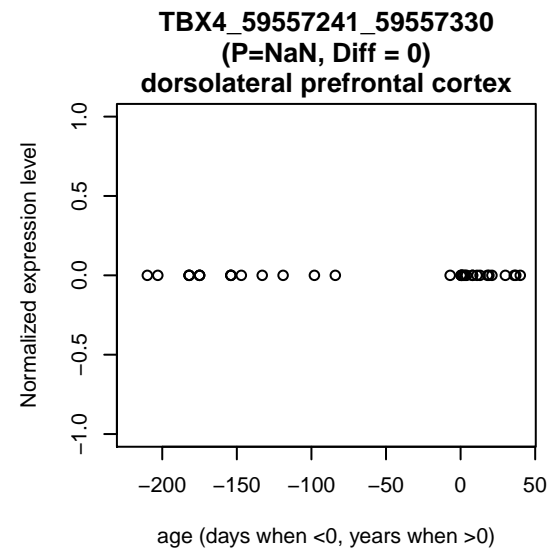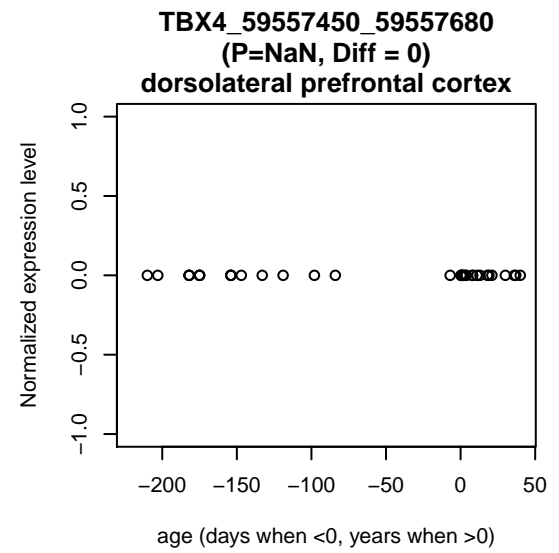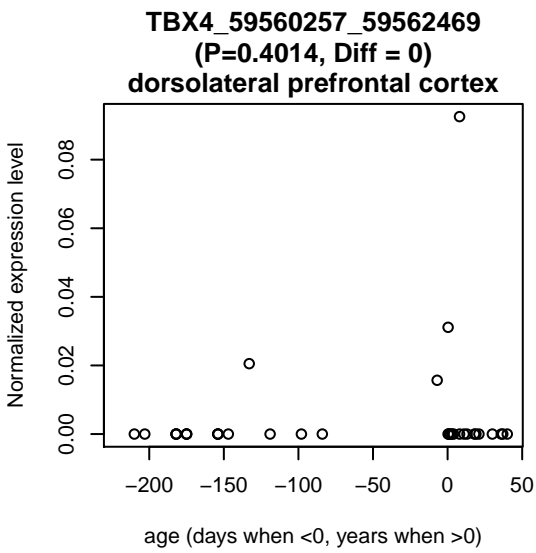

**FRG1\_190861942\_190862226**  
(P=0, Diff = 10.24)  
dorsolateral prefrontal cortex

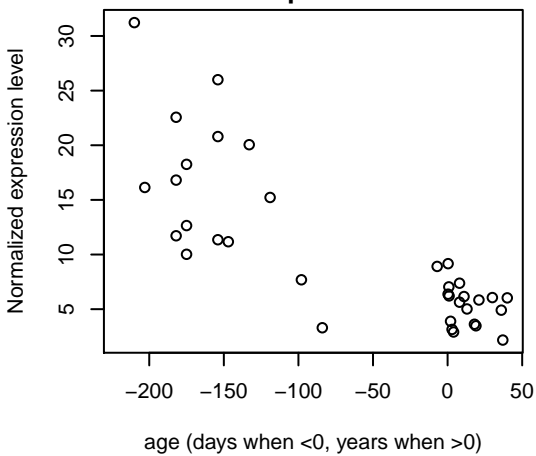

**FRG1\_190862987\_190863159**  
(P=0.2566, Diff = 0.05)  
dorsolateral prefrontal cortex

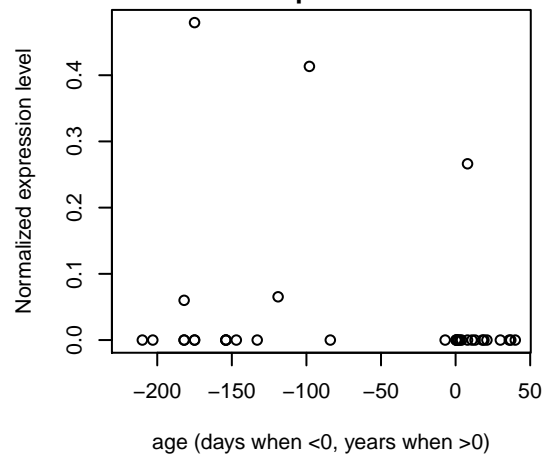

**FRG1\_190864356\_190864427**  
(P=3e-04, Diff = 11.58)  
dorsolateral prefrontal cortex

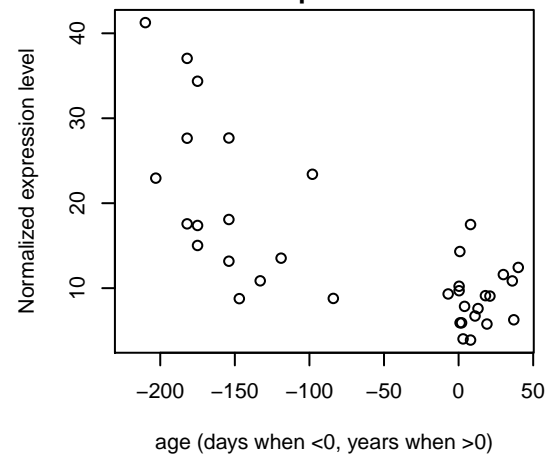

**FRG1\_190873316\_190873442**  
(P=2e-04, Diff = 22.11)  
dorsolateral prefrontal cortex

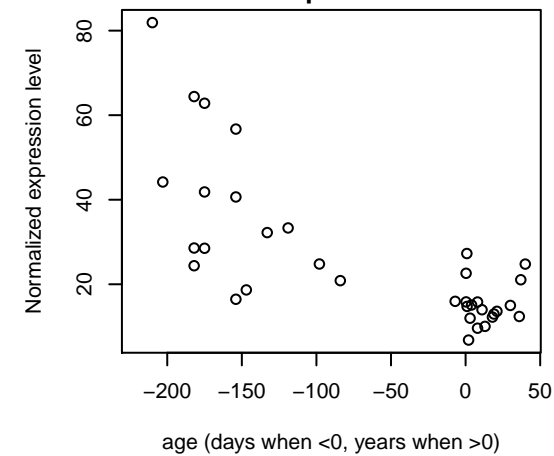

**FRG1\_190874222\_190874280**  
(P=1e-04, Diff = 12.02)  
dorsolateral prefrontal cortex

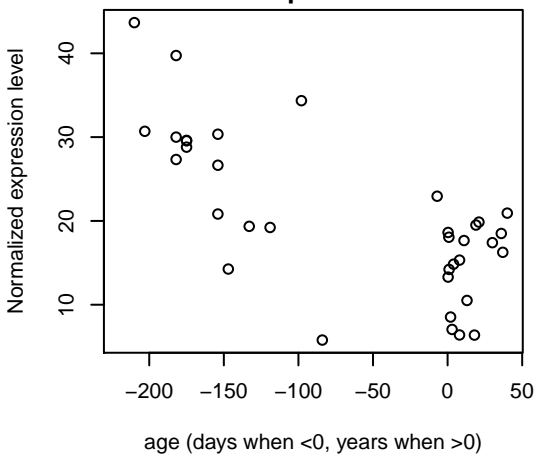

**FRG1\_190876191\_190876306**  
(P=1e-04, Diff = 14.06)  
dorsolateral prefrontal cortex

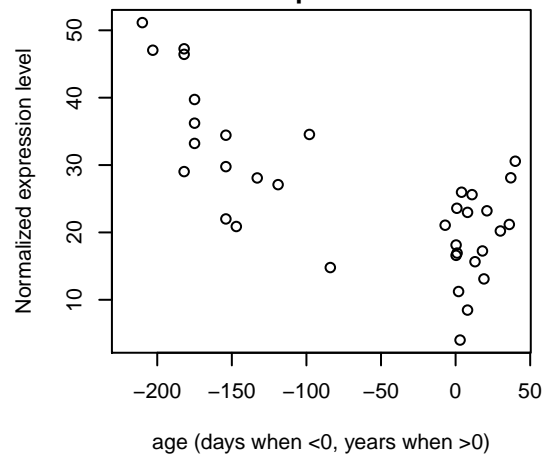

**FRG1\_190878552\_190878657**  
(P=0.0091, Diff = 5.32)  
dorsolateral prefrontal cortex

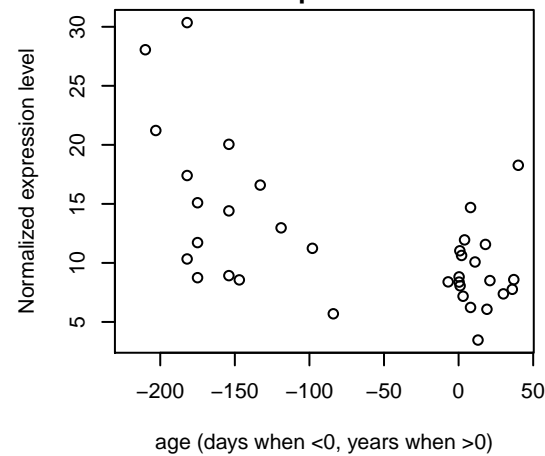

**FRG1\_190881902\_190881994**  
(P=0.0203, Diff = 4.81)  
dorsolateral prefrontal cortex

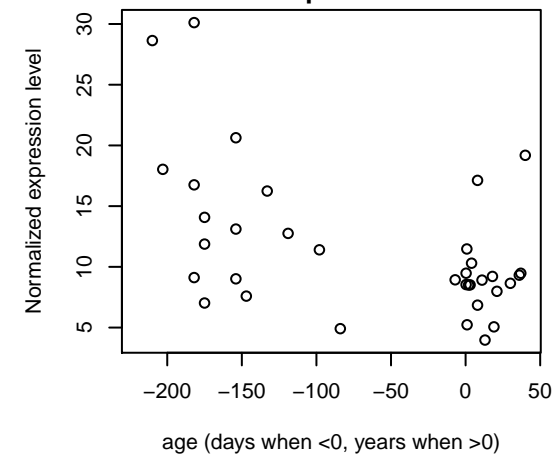

**FRG1\_190882016\_190882355**  
(P=0.0239, Diff = 0.32)  
dorsolateral prefrontal cortex

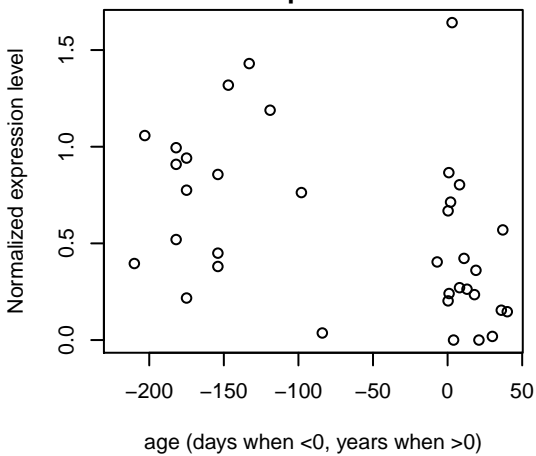

**FRG1\_190882583\_190882705**  
(P=0.9476, Diff = -0.01)  
dorsolateral prefrontal cortex

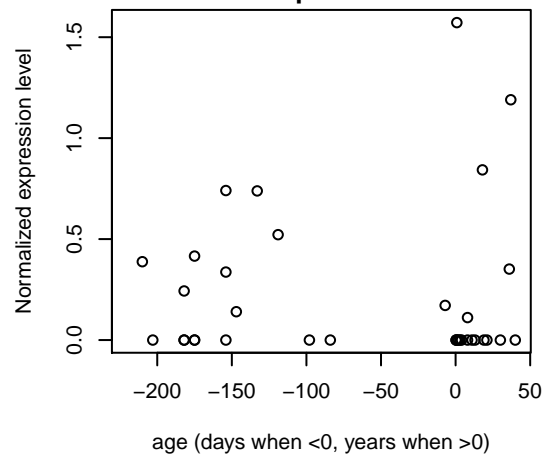

**FRG1\_190882976\_190883087**  
(P=0.0231, Diff = 14.76)  
dorsolateral prefrontal cortex

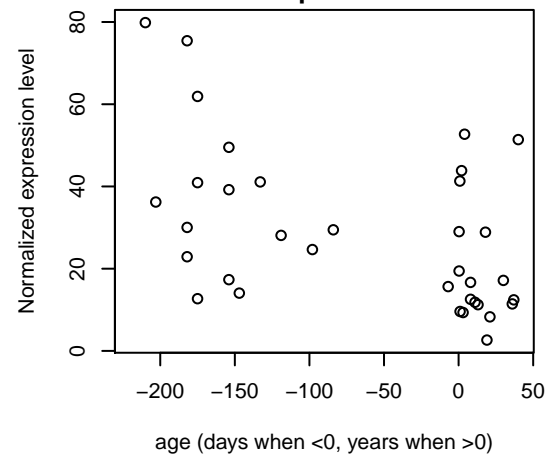

**FRG1\_190884247\_190884359**  
(P=0.0706, Diff = 6.78)  
dorsolateral prefrontal cortex

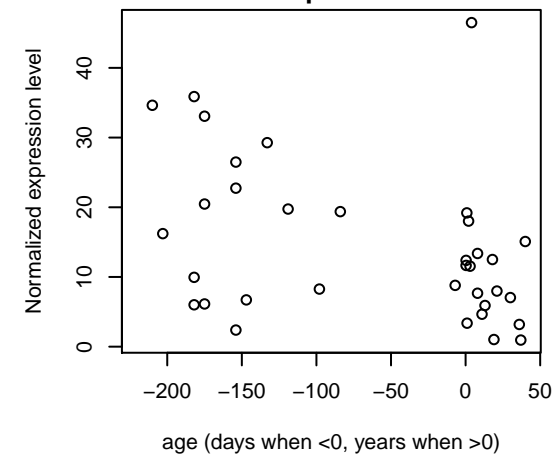

**METTL4\_2537523\_2539144**  
(P=0.8125, Diff = -0.07)  
dorsolateral prefrontal cortex

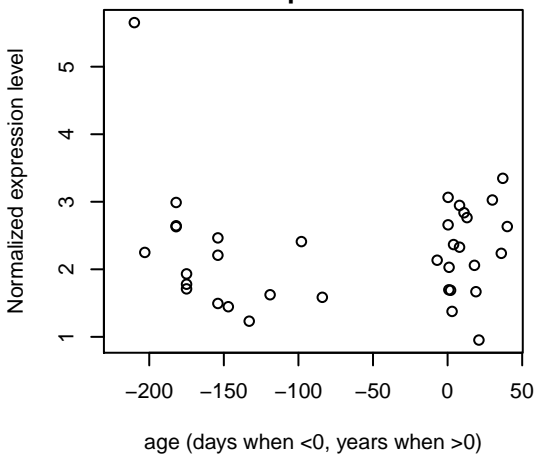

**METTL4\_2544193\_2544285**  
(P=0.4396, Diff = 0.44)  
dorsolateral prefrontal cortex

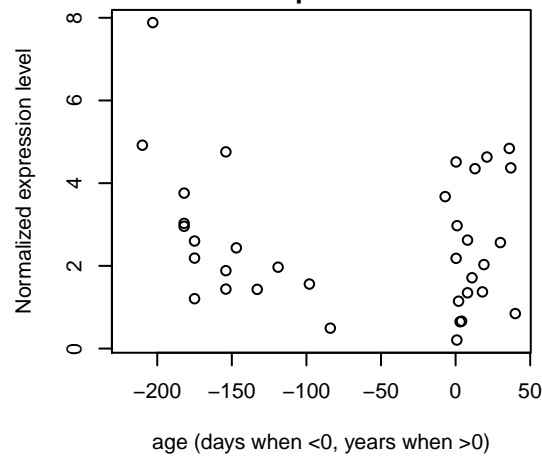

**METTL4\_2544651\_2544758**  
(P=0.4689, Diff = 0.37)  
dorsolateral prefrontal cortex

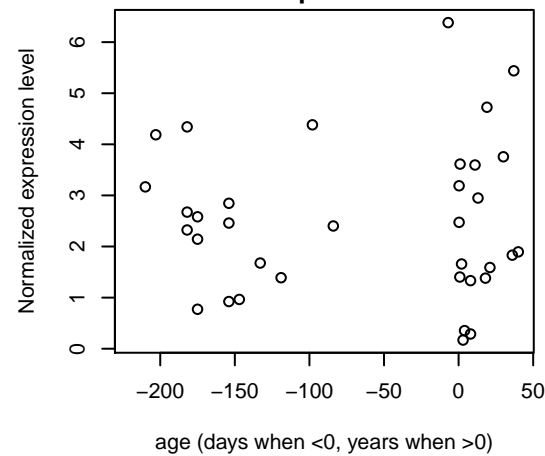

**METTL4\_2547353\_2547528**  
(P=0.0347, Diff = 0.99)  
dorsolateral prefrontal cortex

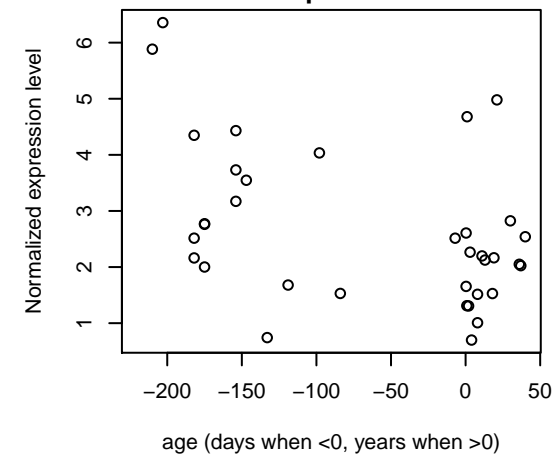

**METTL4\_2552693\_2552763**  
(P=0.5563, Diff = -0.39)  
dorsolateral prefrontal cortex

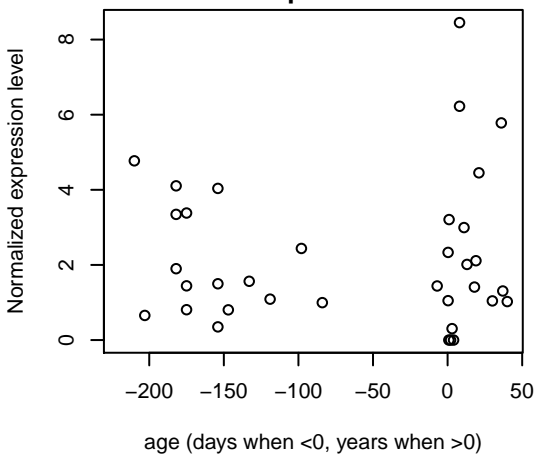

**METTL4\_2554667\_2555037**  
(P=0.3809, Diff = 0.36)  
dorsolateral prefrontal cortex

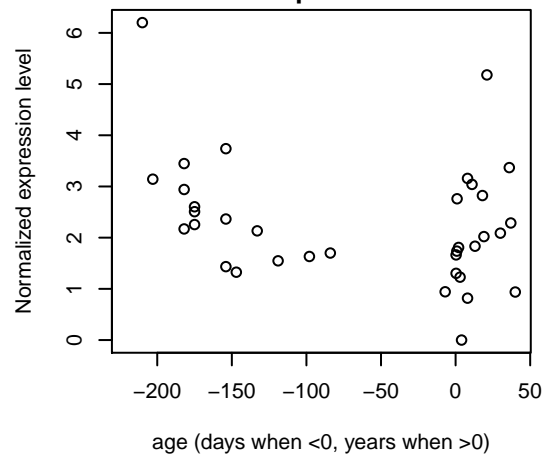

**METTL4\_2563795\_2563858**  
(P=0.0911, Diff = 1.12)  
dorsolateral prefrontal cortex

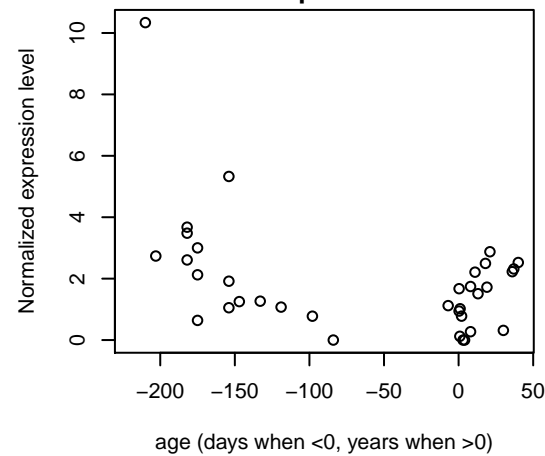

**METTL4\_2566819\_2567653**  
(P=0.0155, Diff = 1.03)  
dorsolateral prefrontal cortex

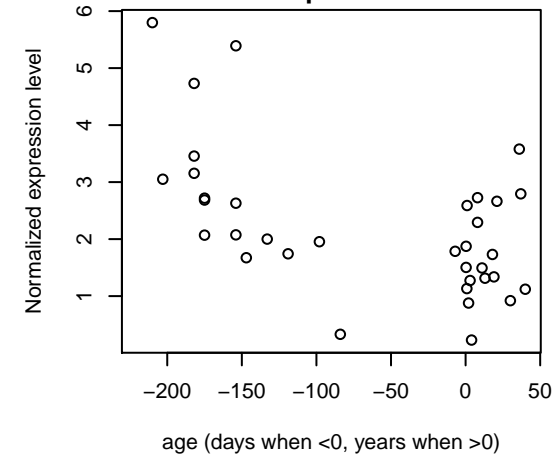

**METTL4\_2571147\_2571508**  
(P=0.0051, Diff = 1.05)  
dorsolateral prefrontal cortex

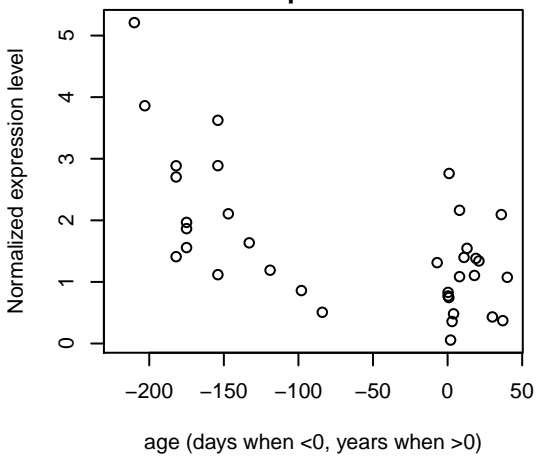

**C7orf11\_40172341\_40172858**  
(P=0.0041, Diff = 7.74)  
dorsolateral prefrontal cortex

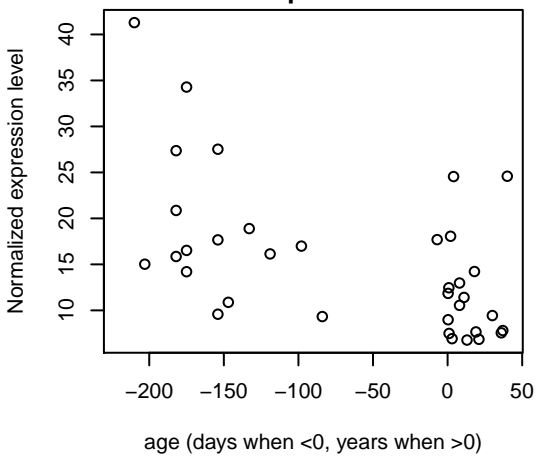

**C7orf11\_40173827\_40174258**  
(P=1e-04, Diff = 8.3)  
dorsolateral prefrontal cortex

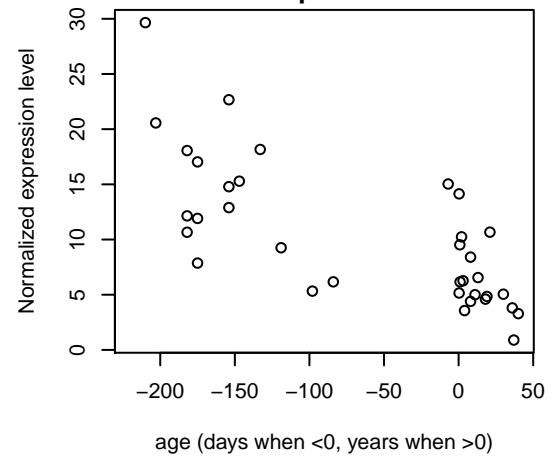



**KLF13\_31619057\_31619992**  
(P=0.0866, Diff = 0.95)  
hippocampus

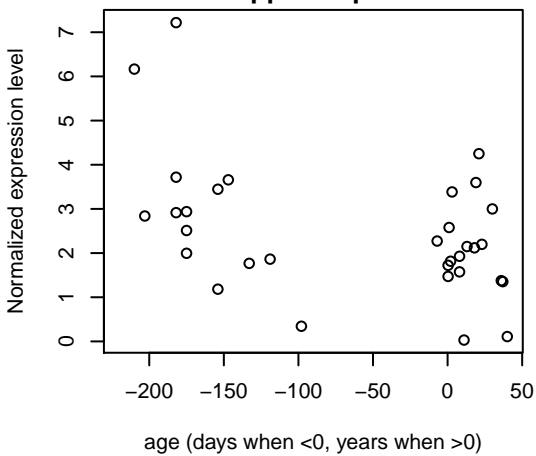

**KLF13\_31632135\_31632190**  
(P=0.8983, Diff = 0.01)  
hippocampus

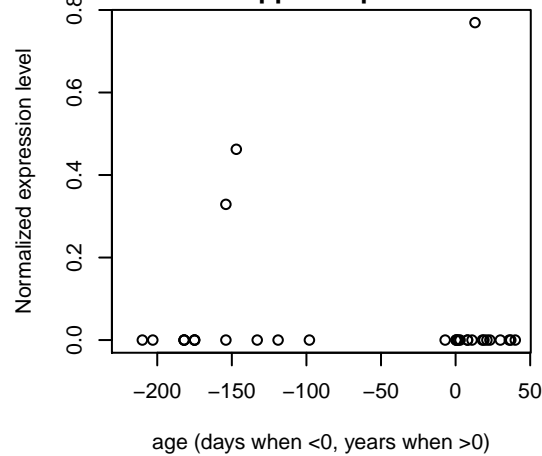

**KLF13\_31658356\_31658757**  
(P=0.0047, Diff = -0.41)  
hippocampus

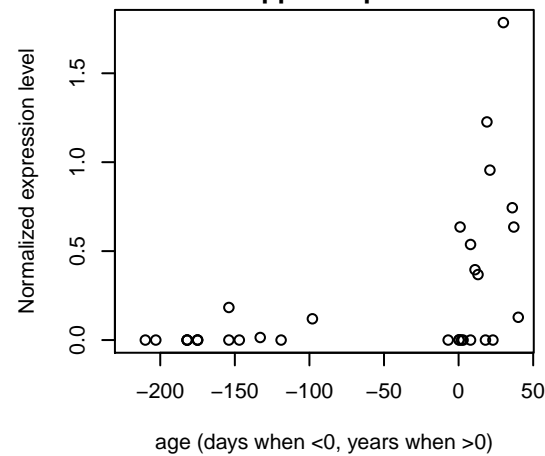

**KLF13\_31664212\_31670102**  
(P=0.0269, Diff = -5.2)  
hippocampus

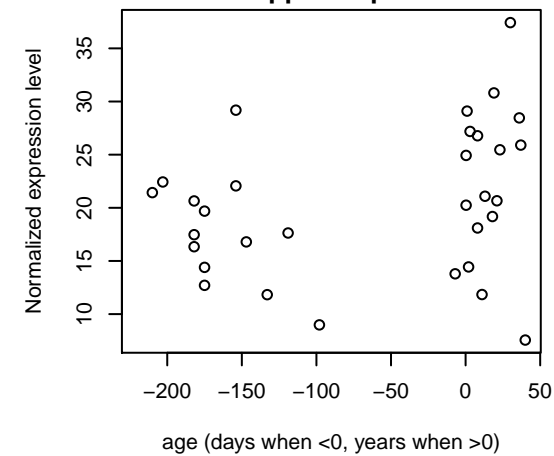

**KLF13\_31685045\_31685458**  
(P=0.107, Diff = -0.06)  
hippocampus

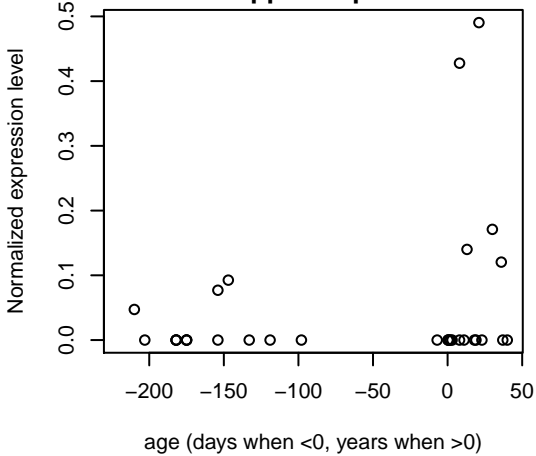

**KLF13\_31685777\_31685894**  
(P=0.5058, Diff = -0.08)  
hippocampus

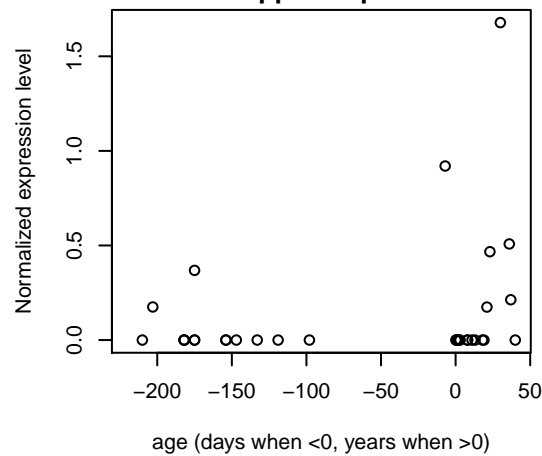

**KLF13\_31695630\_31696113**  
(P=0.0086, Diff = -0.13)  
hippocampus

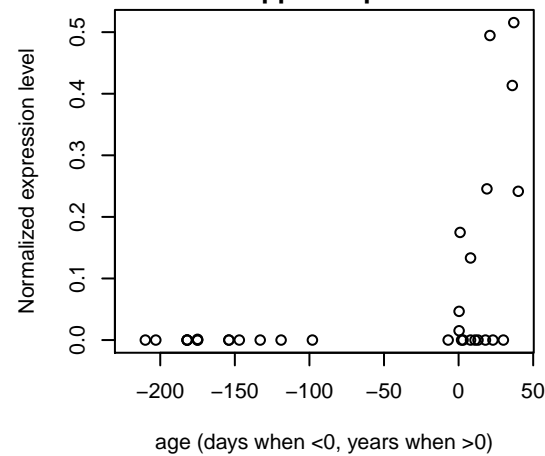

**KLF13\_31727572\_31727868**  
(P=0.0334, Diff = -0.16)  
hippocampus

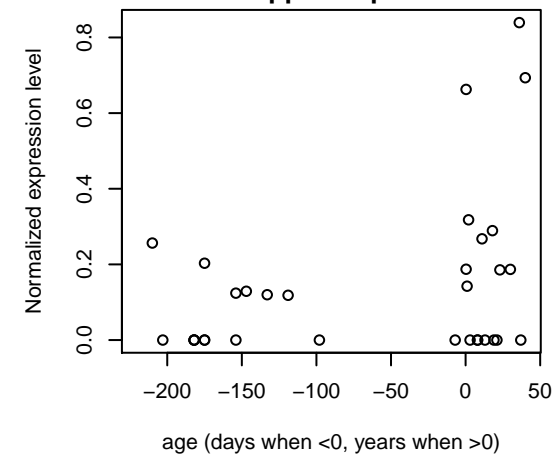

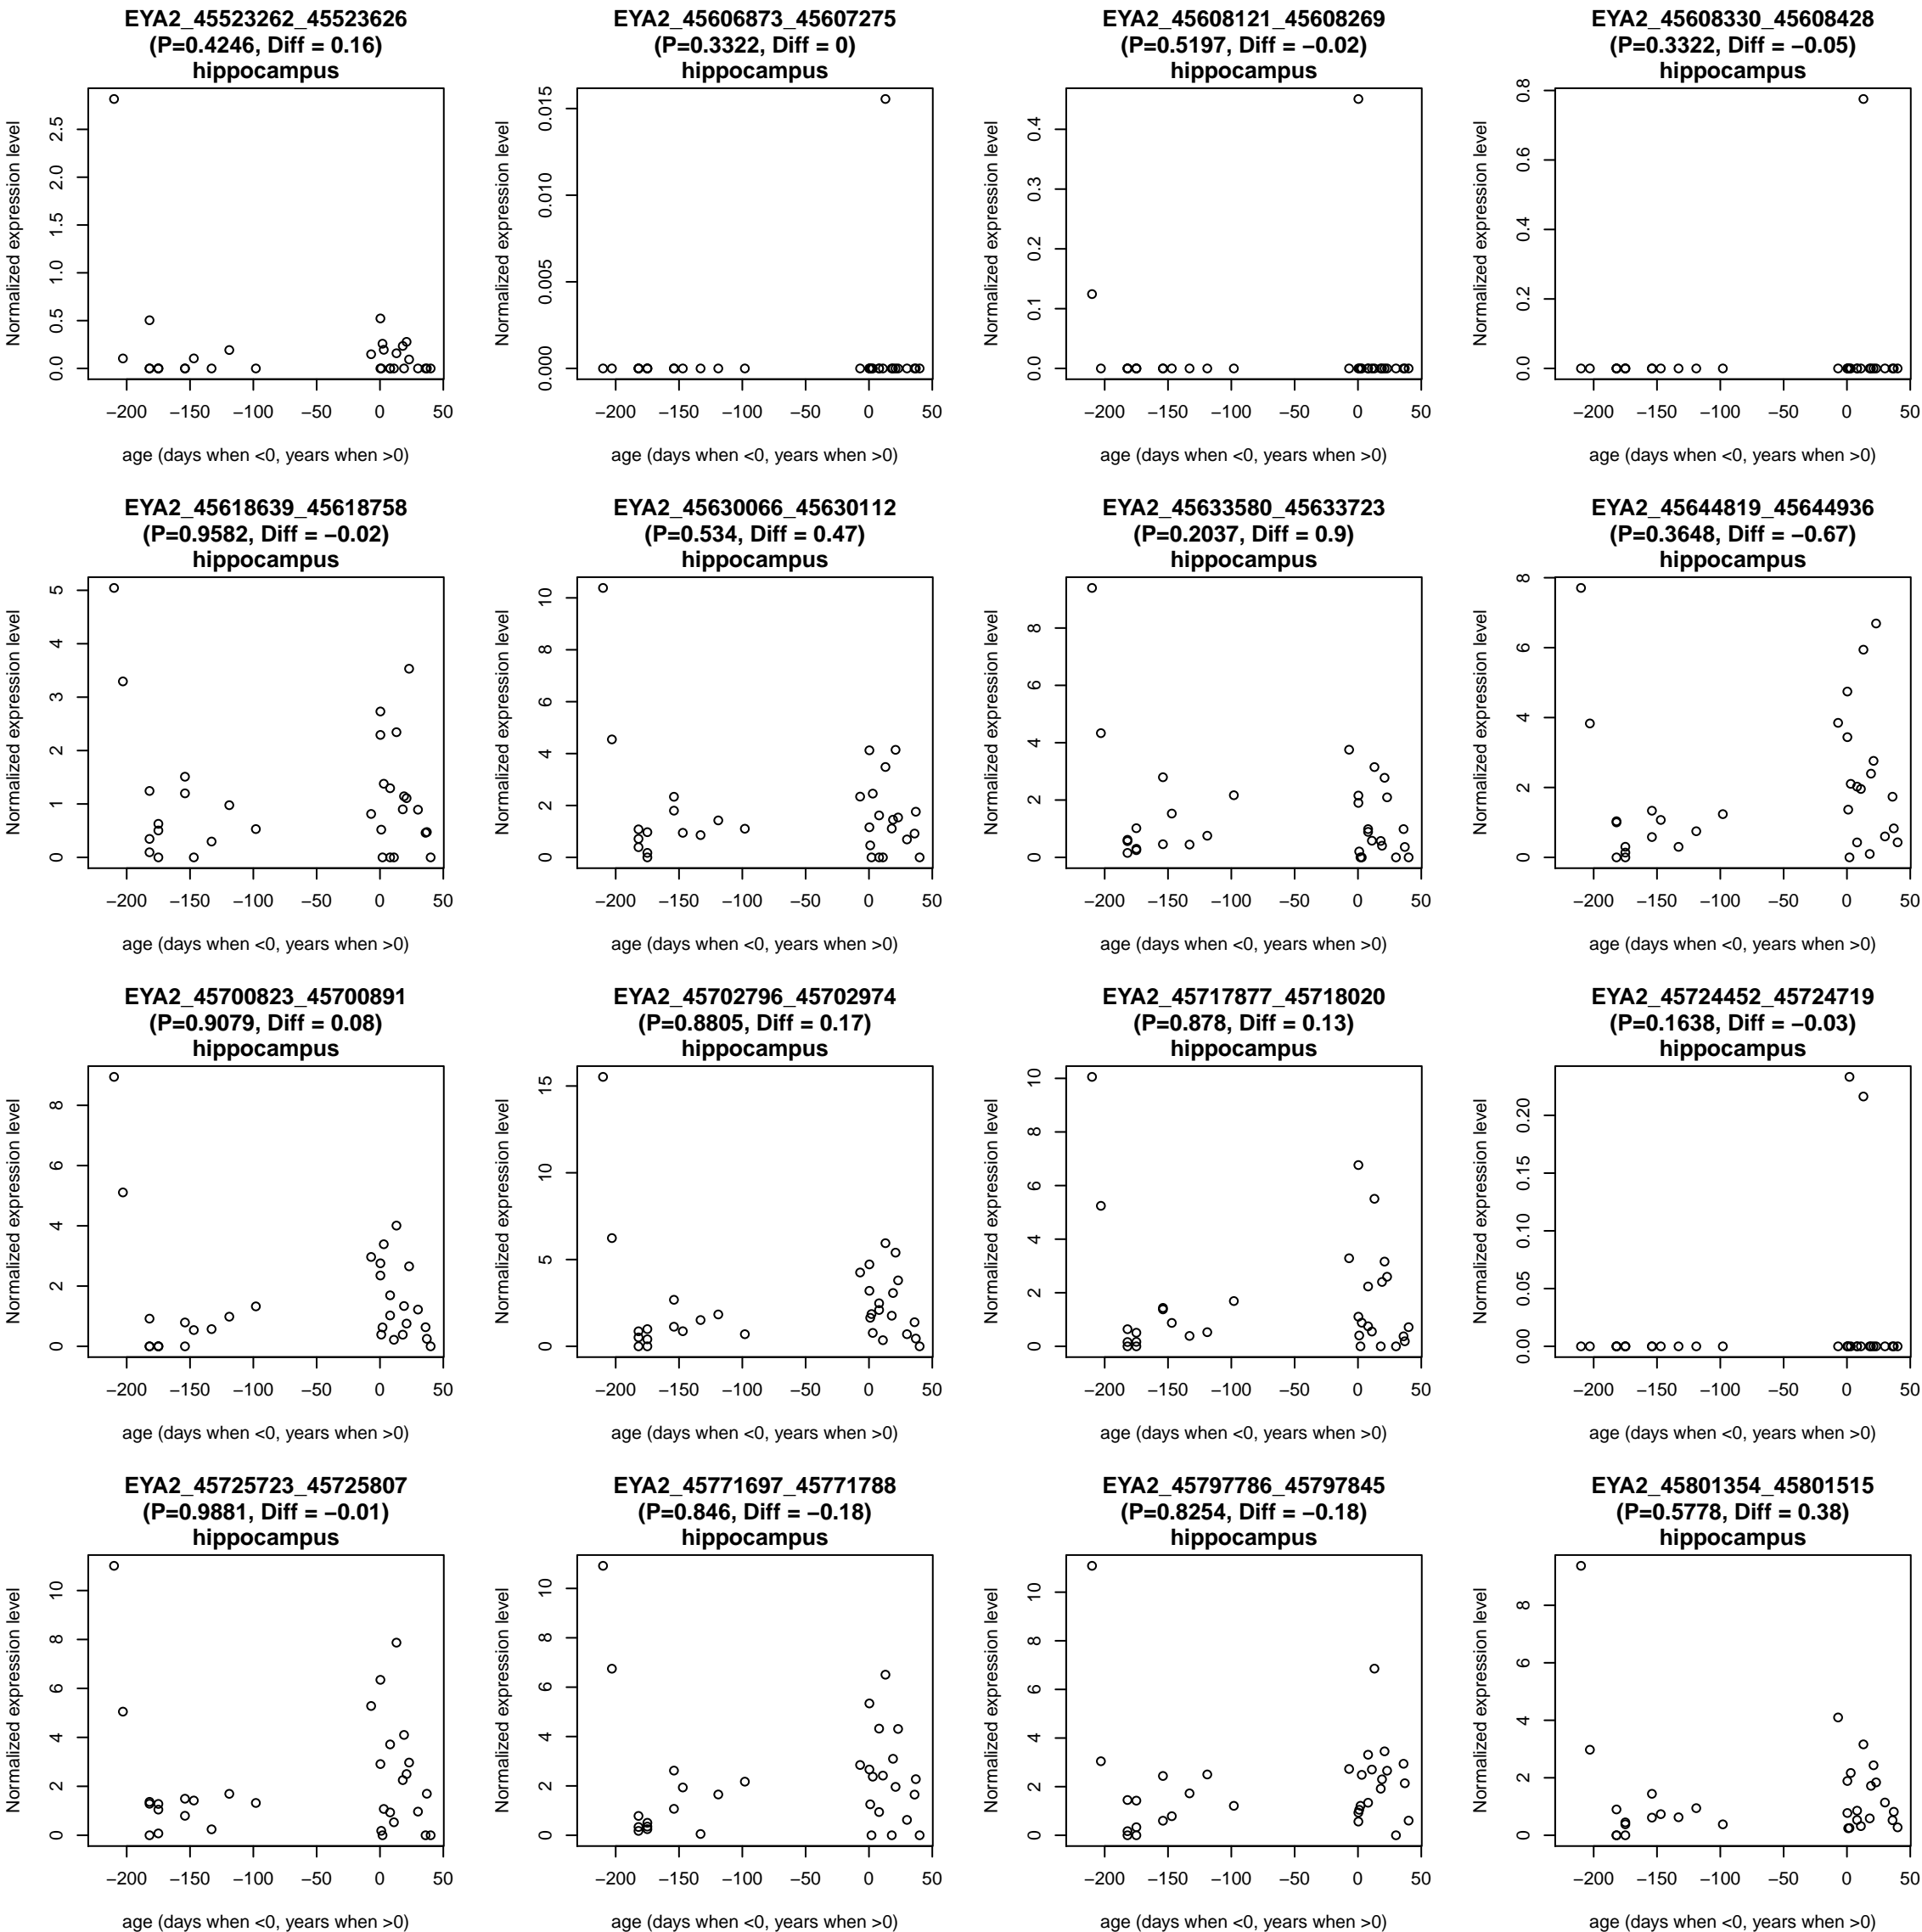

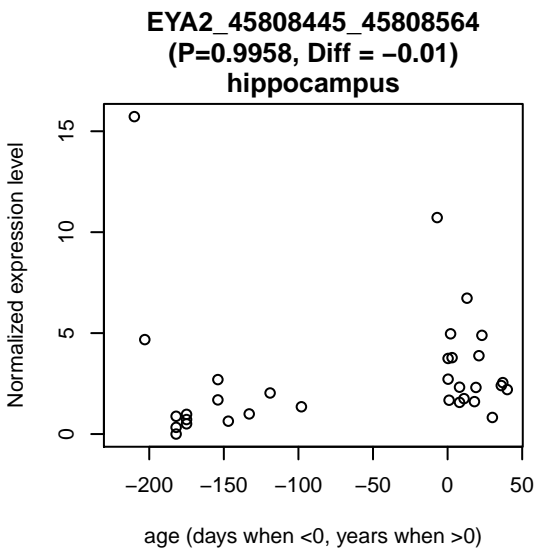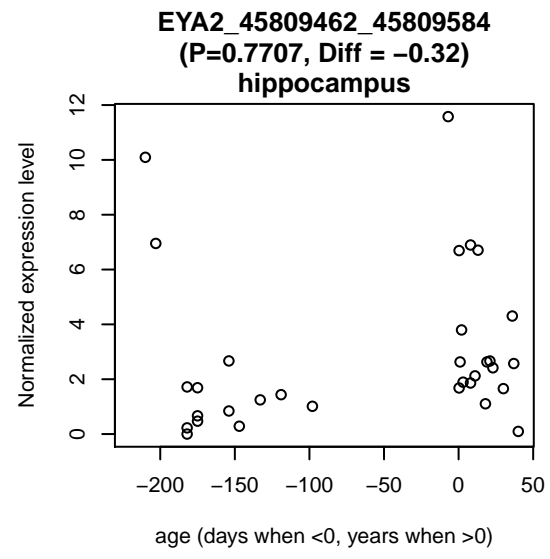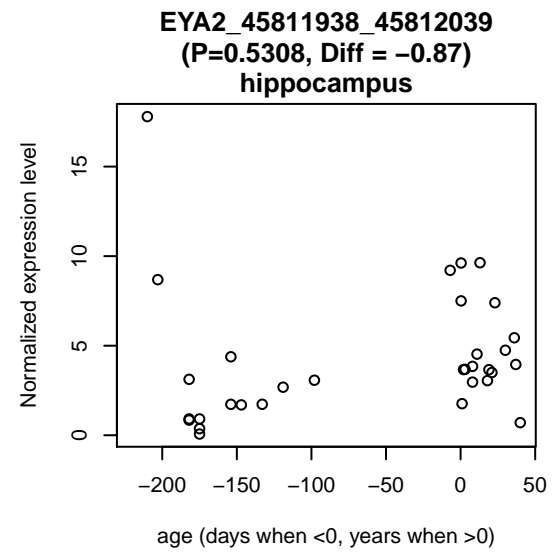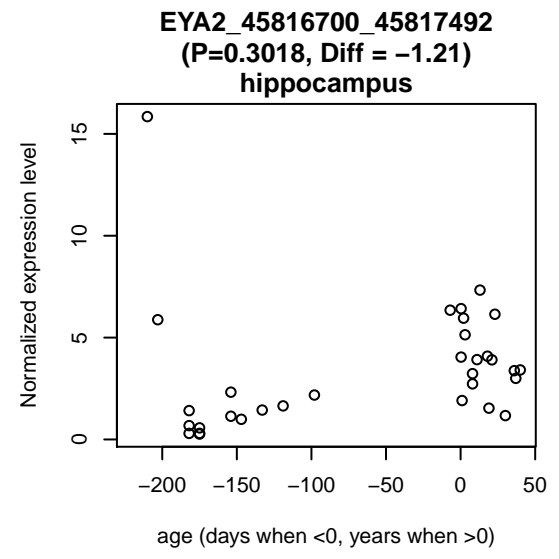

**LMCD1\_8543392\_8543666**  
(P=0.5158, Diff = 0.3)  
hippocampus

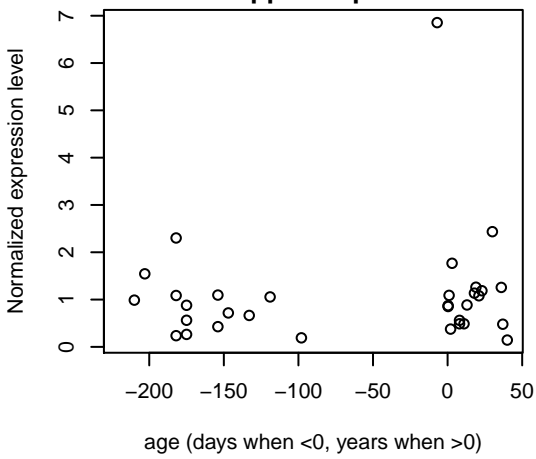

**LMCD1\_8556610\_8556681**  
(P=0.1208, Diff = -0.25)  
hippocampus

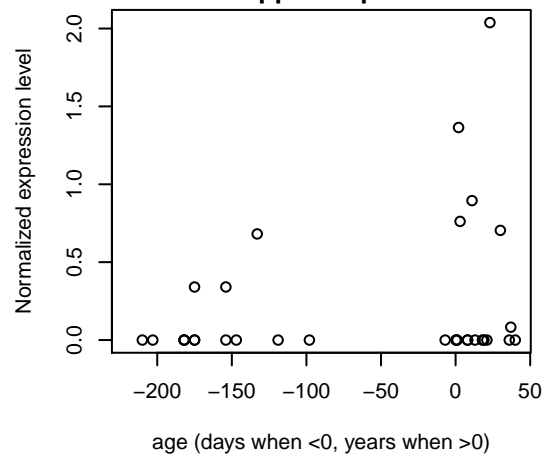

**LMCD1\_8574422\_8574511**  
(P=0.5753, Diff = -0.77)  
hippocampus

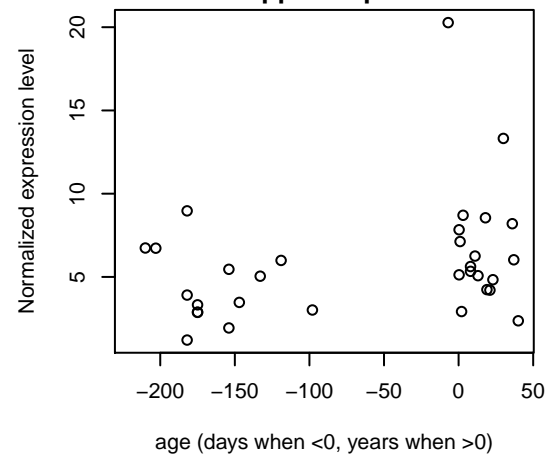

**LMCD1\_8578868\_8579204**  
(P=0.8622, Diff = -0.15)  
hippocampus

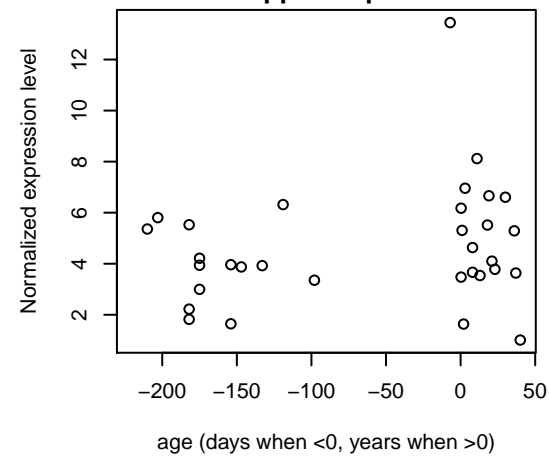

**LMCD1\_8590253\_8590589**  
(P=0.3933, Diff = -0.81)  
hippocampus

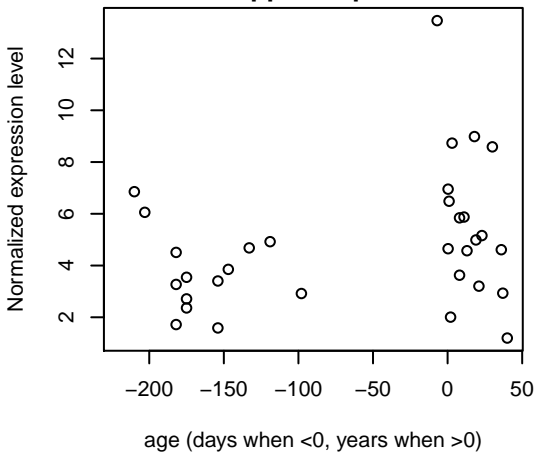

**LMCD1\_8591559\_8592135**  
(P=0.263, Diff = -0.04)  
hippocampus

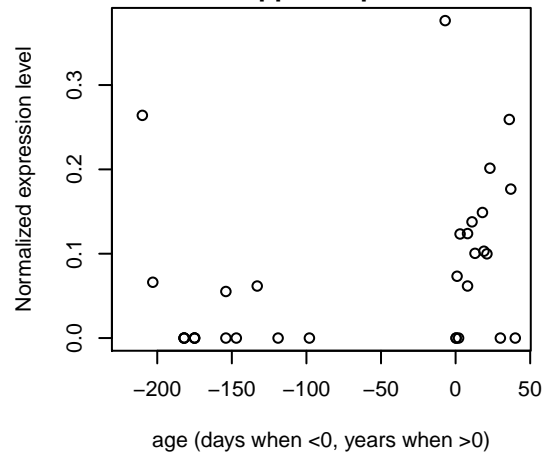

**LMCD1\_8607117\_8607333**  
(P=0.5942, Diff = -0.57)  
hippocampus

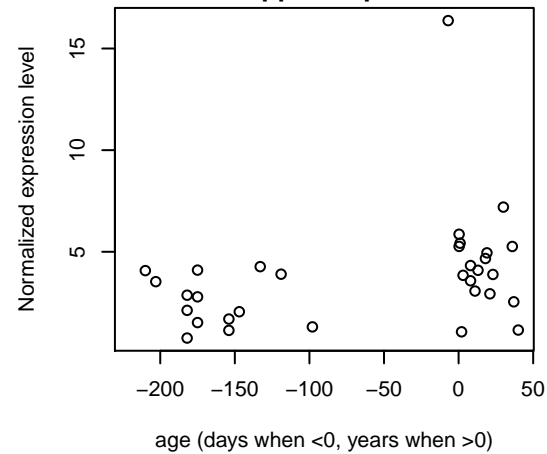

**LMCD1\_8609125\_8609805**  
(P=0.0036, Diff = -3.12)  
hippocampus

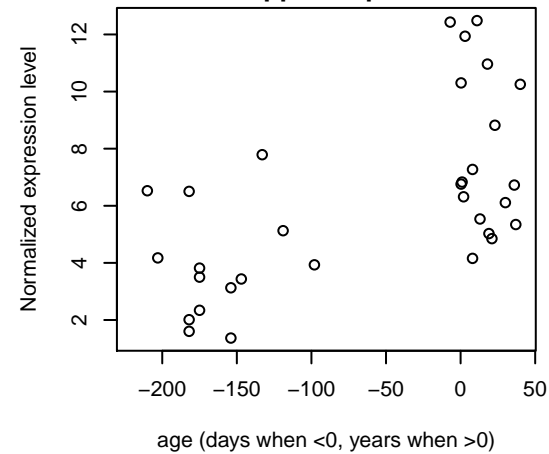

**WVOX\_78133550\_78133782**  
(P=0.5147, Diff = 0.63)  
hippocampus

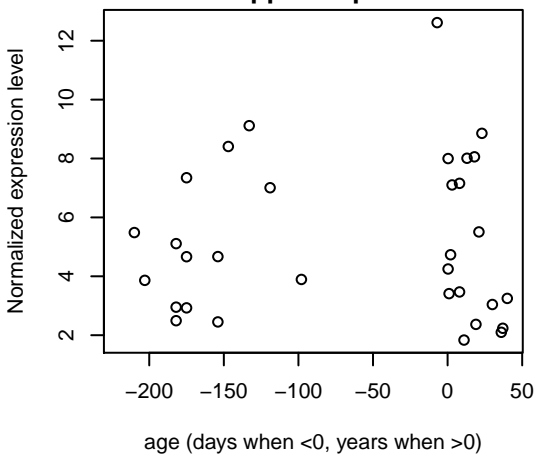

**WVOX\_78142319\_78142384**  
(P=0.9796, Diff = -0.03)  
hippocampus

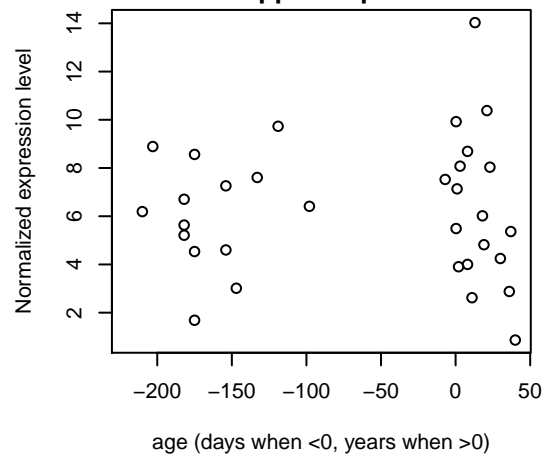

**WVOX\_78143674\_78143732**  
(P=0.3772, Diff = -1.16)  
hippocampus

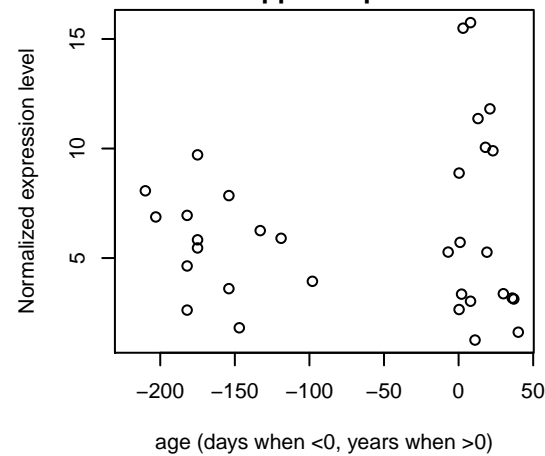

**WVOX\_78148872\_78149051**  
(P=0.6391, Diff = -0.42)  
hippocampus

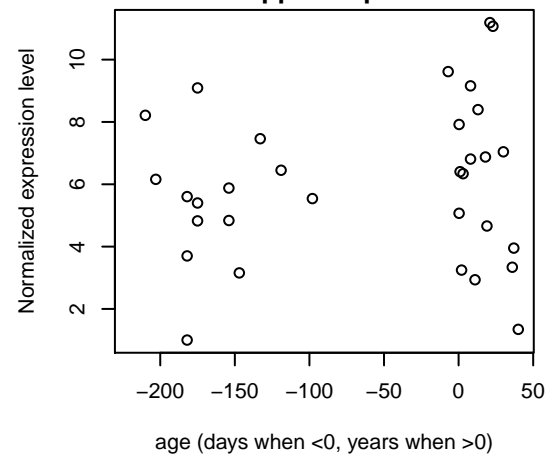

**WVOX\_78198079\_78198186**  
(P=0.5889, Diff = -0.5)  
hippocampus

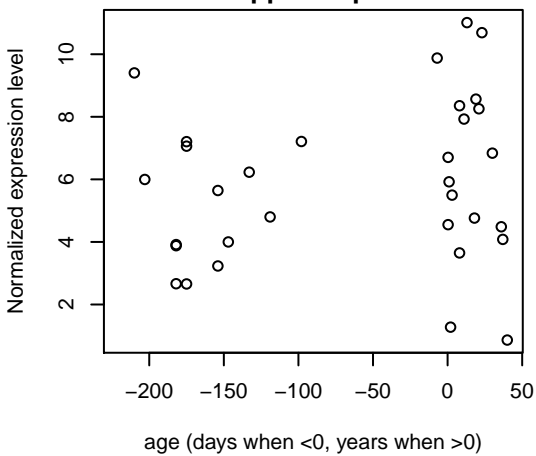

**WVOX\_78312499\_78312593**  
(P=0.879, Diff = -0.01)  
hippocampus

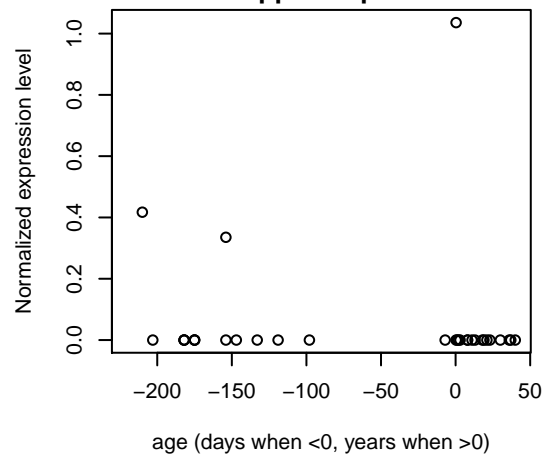

**WVOX\_78420756\_78420845**  
(P=0.1299, Diff = -1.72)  
hippocampus

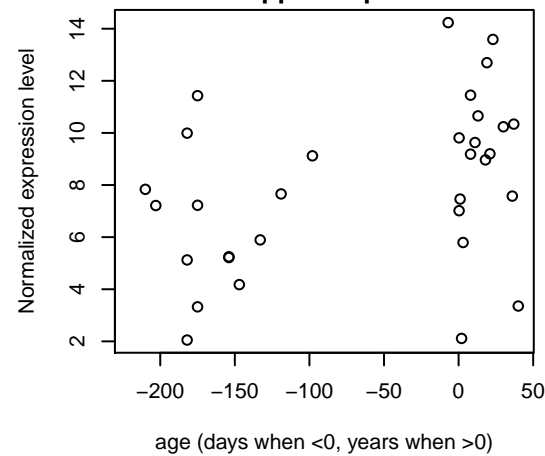

**WVOX\_78458766\_78458952**  
(P=0.0759, Diff = -2.01)  
hippocampus

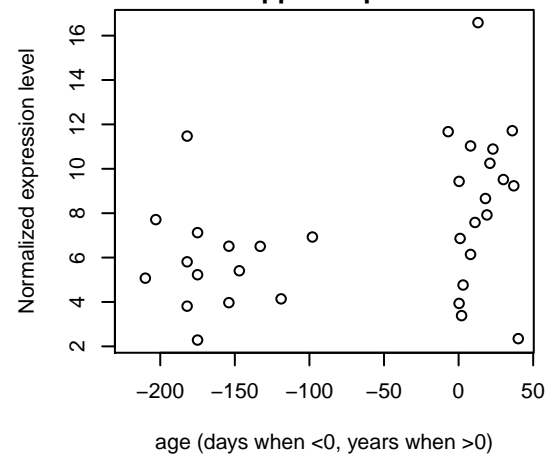

**WVOX\_78466384\_78466649**  
(P=0.0918, Diff = -1.6)  
hippocampus

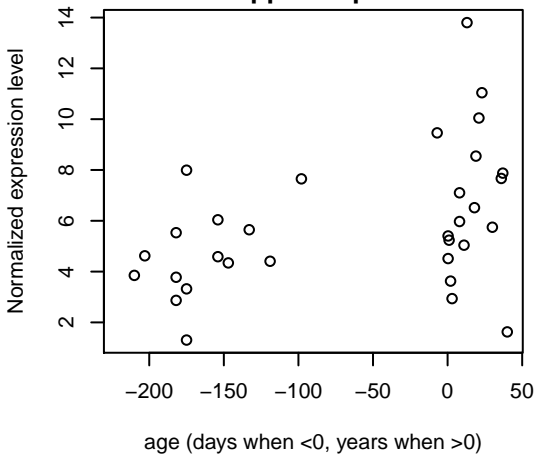

**WVOX\_78790836\_78790912**  
(P=0.9179, Diff = -0.01)  
hippocampus

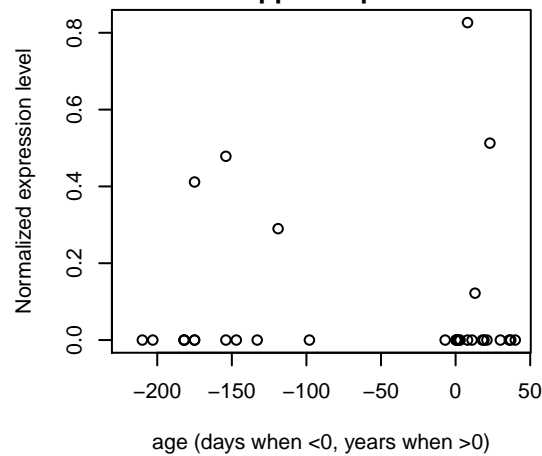

**WVOX\_79245504\_79246031**  
(P=0.0196, Diff = -2.04)  
hippocampus

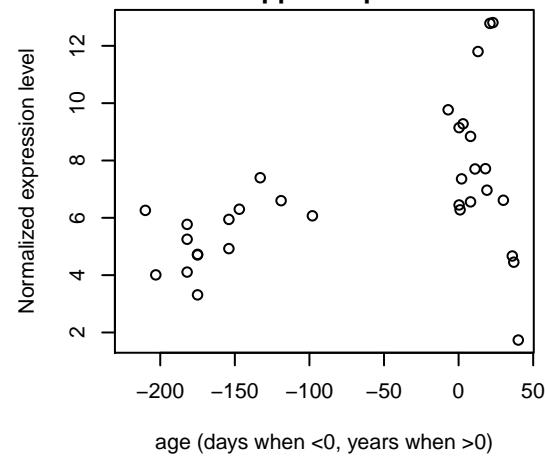

**SLC13A3\_45186462\_45188837**  
(P=0, Diff = -2.76)  
**hippocampus**

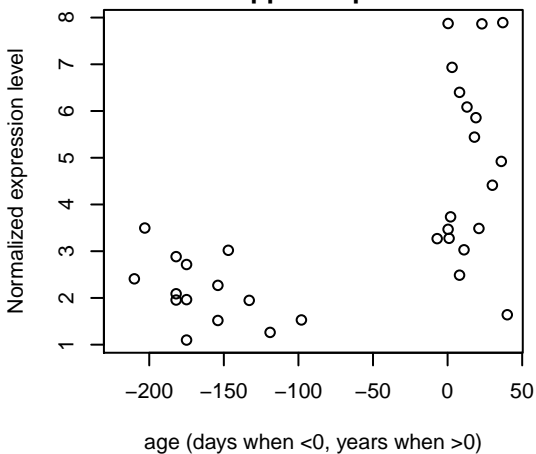

**SLC13A3\_45192052\_45192190**  
(P=0.0299, Diff = -1.11)  
**hippocampus**

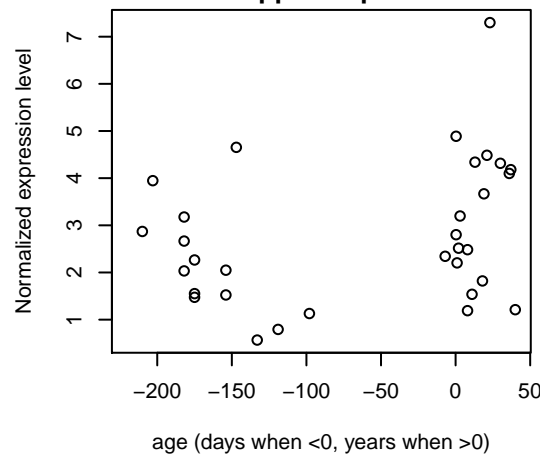

**SLC13A3\_45194867\_45195029**  
(P=0.0288, Diff = -1.25)  
**hippocampus**

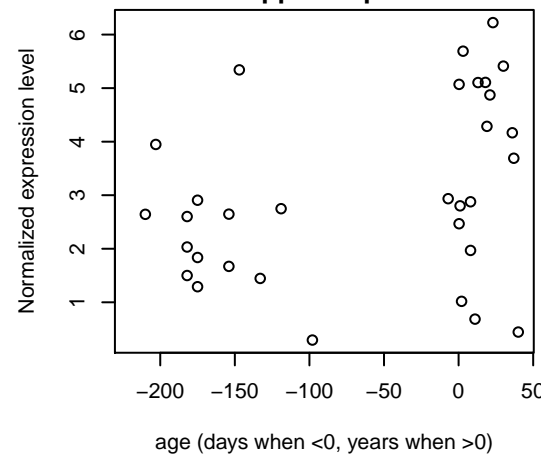

**SLC13A3\_45204211\_45204324**  
(P=0.386, Diff = -0.52)  
**hippocampus**

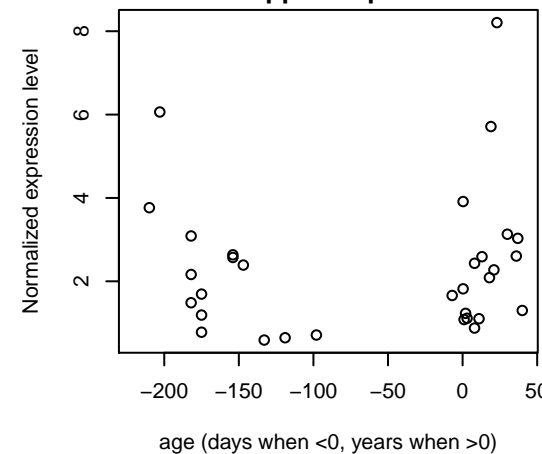

**SLC13A3\_45211549\_45212308**  
(P=0.0579, Diff = -0.15)  
**hippocampus**

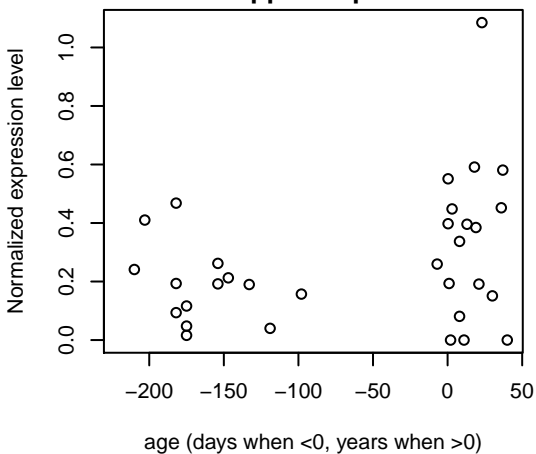

**SLC13A3\_45213986\_45214382**  
(P=0.446, Diff = 0.09)  
**hippocampus**

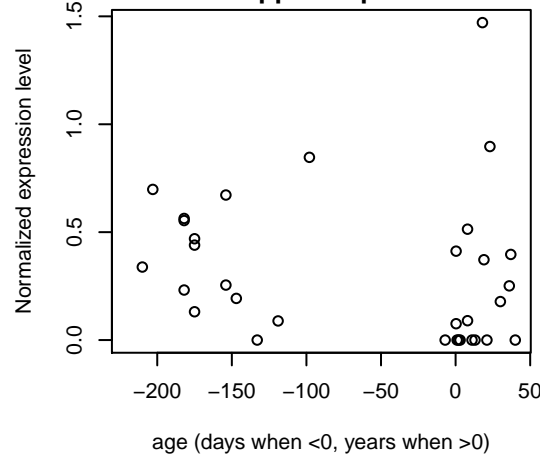

**SLC13A3\_45216697\_45216802**  
(P=0.9802, Diff = 0.01)  
**hippocampus**

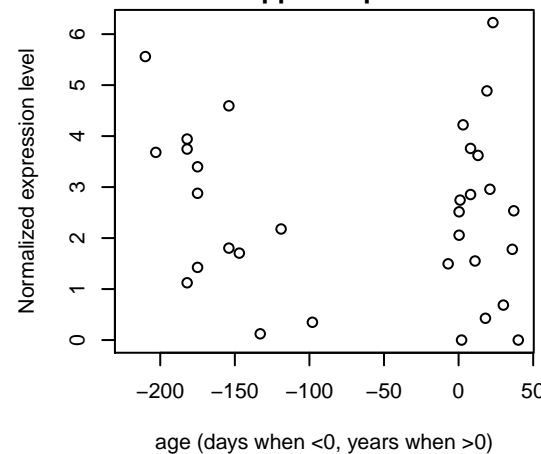

**SLC13A3\_45217798\_45217894**  
(P=0.2196, Diff = -0.64)  
**hippocampus**

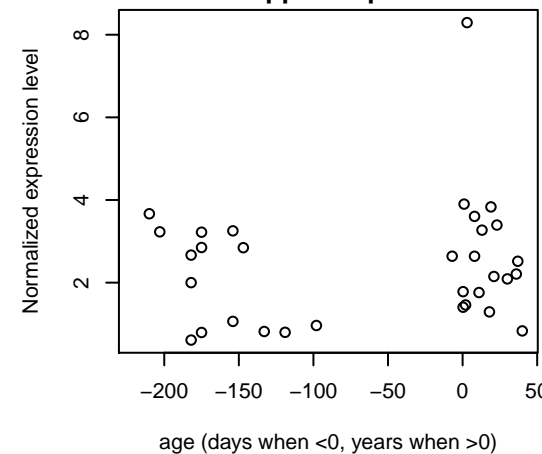

**SLC13A3\_45221042\_45221168**  
(P=0.0156, Diff = -1.15)  
**hippocampus**

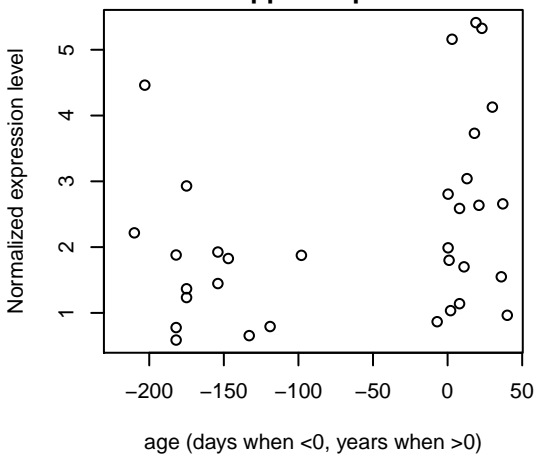

**SLC13A3\_45224795\_45224981**  
(P=0.5778, Diff = -0.33)  
**hippocampus**

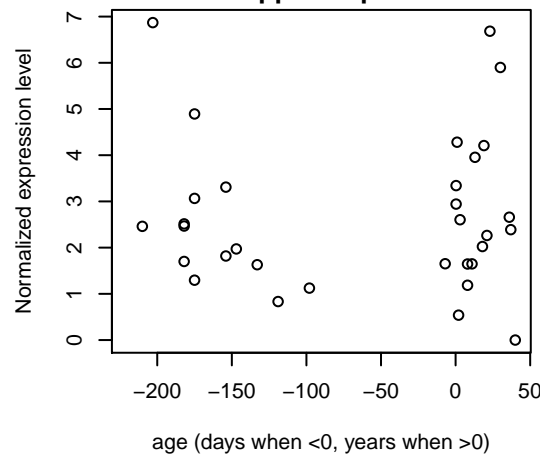

**SLC13A3\_45228609\_45228676**  
(P=0.9583, Diff = -0.03)  
**hippocampus**

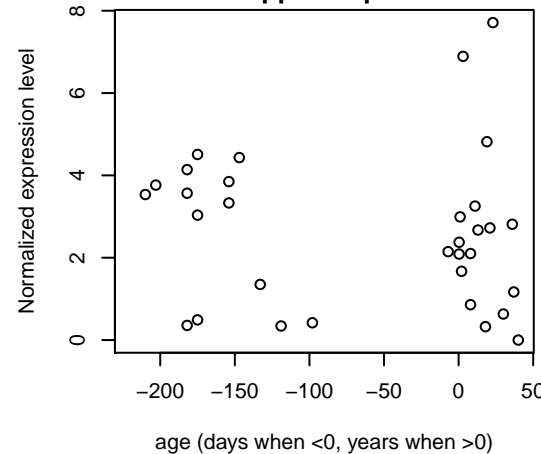

**SLC13A3\_45229226\_45229255**  
(P=NaN, Diff = 0)  
**hippocampus**

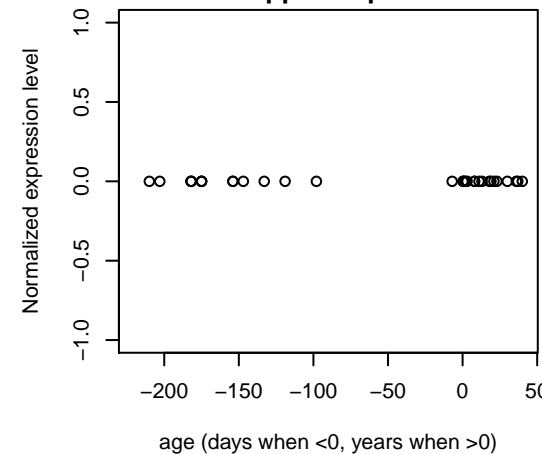

**SLC13A3\_45237347\_45237696**  
(P=0.4303, Diff = -0.05)  
**hippocampus**

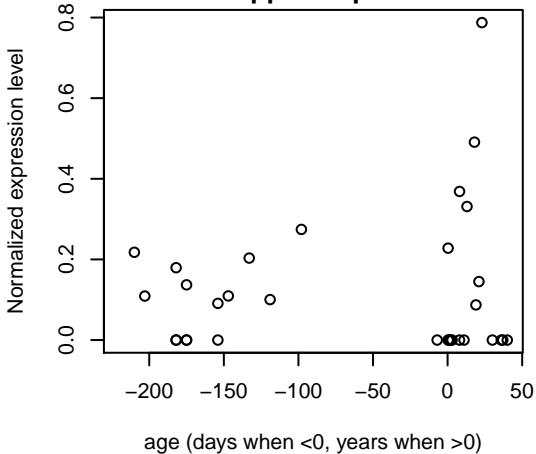

**SLC13A3\_45239084\_45239248**  
(P=0.7932, Diff = 0.15)  
**hippocampus**

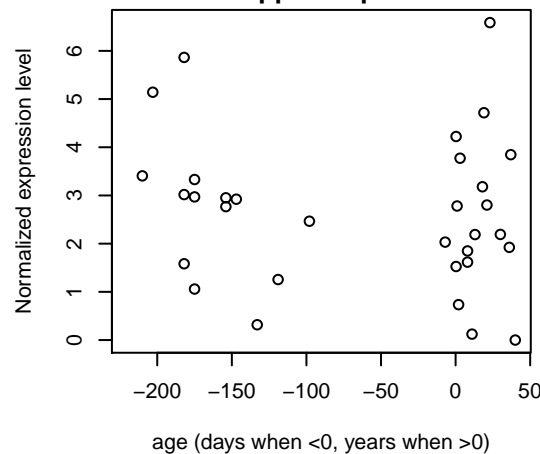

**SLC13A3\_45242098\_45242525**  
(P=0.9712, Diff = -0.01)  
**hippocampus**

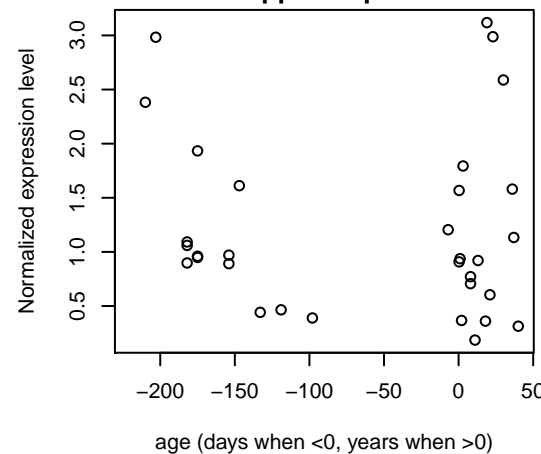

**SLC13A3\_45279949\_45280098**  
(P=0.1324, Diff = -0.23)  
**hippocampus**

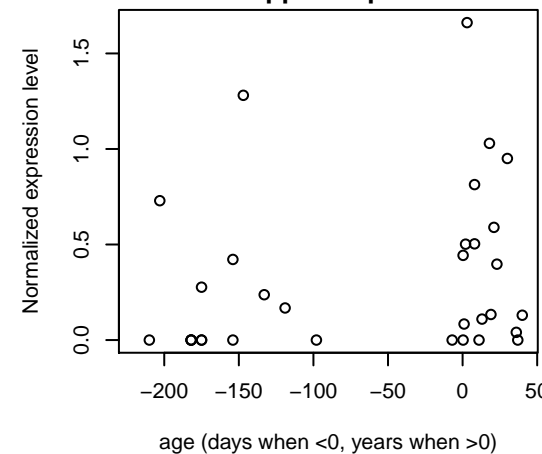

**SLC13A3\_45298681\_45298778**  
(P=0.01, Diff = 0.76)  
hippocampus

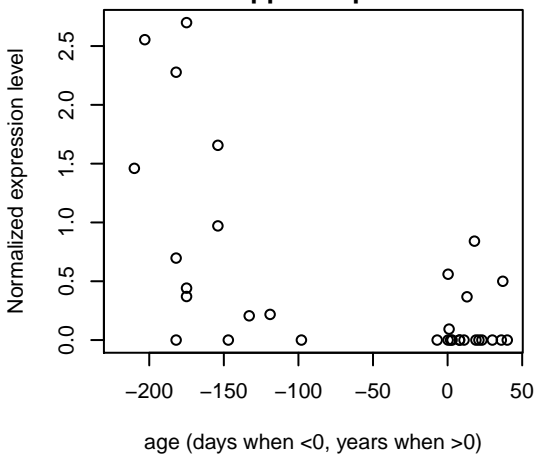

**SLC13A3\_45302302\_45302417**  
(P=0.044, Diff = -0.22)  
hippocampus

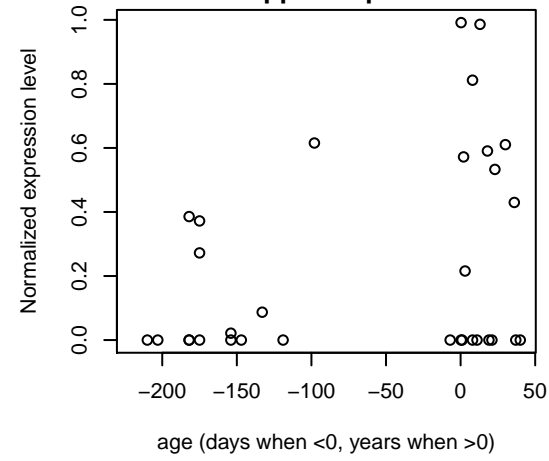

**SLC13A3\_45304585\_45304714**  
(P=0.0591, Diff = -0.3)  
hippocampus

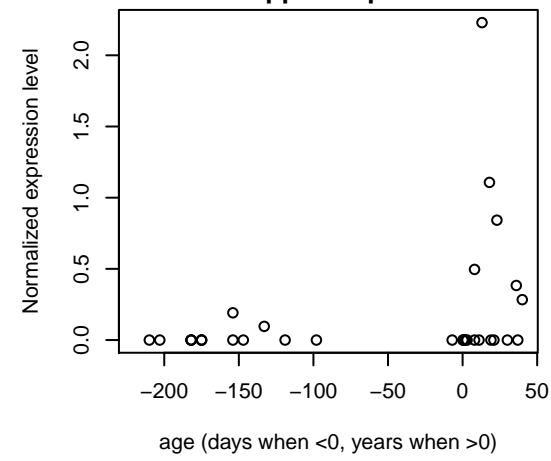

HTR1B\_78171947\_78173490  
(P=0.7975, Diff = 0.03)  
hippocampus

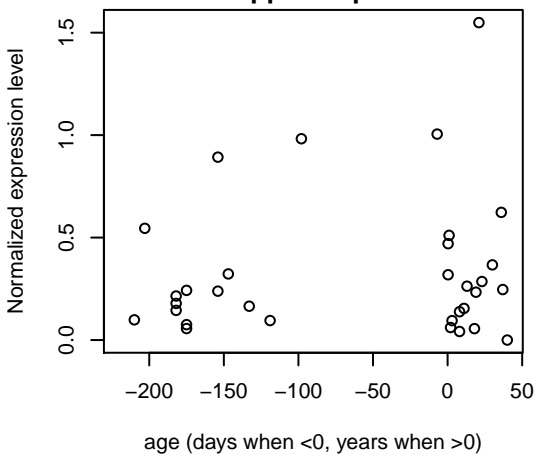



**MYOM1\_3066804\_3067553**  
(P=0, Diff = -4.72)  
**hippocampus**

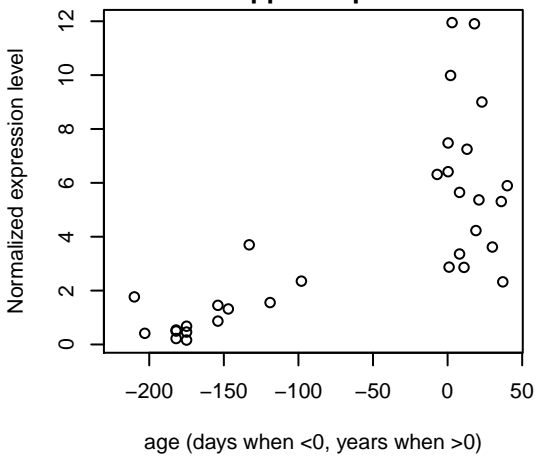

**MYOM1\_3071831\_3071887**  
(P=0, Diff = -3.91)  
**hippocampus**

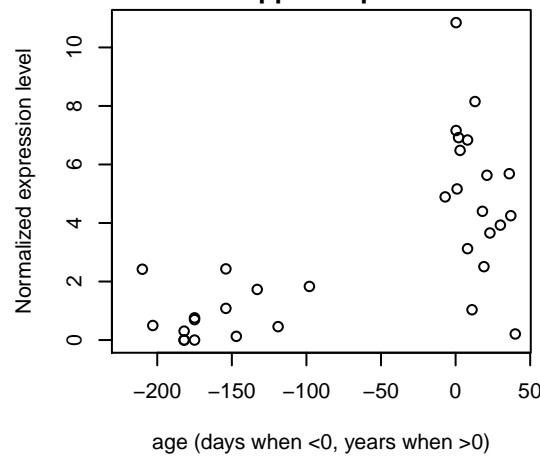

**MYOM1\_3075451\_3075474**  
(P=0, Diff = -4.41)  
**hippocampus**

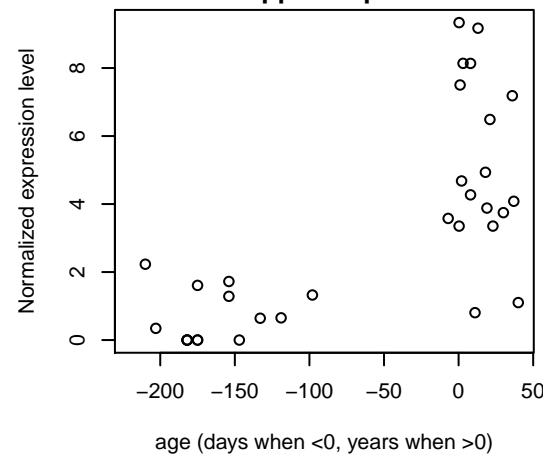

**MYOM1\_3075615\_3075638**  
(P=0.2108, Diff = -0.24)  
**hippocampus**

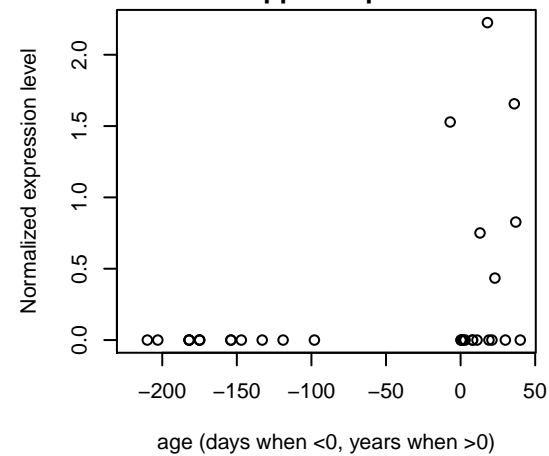

**MYOM1\_3075722\_3075759**  
(P=0, Diff = -5.33)  
**hippocampus**

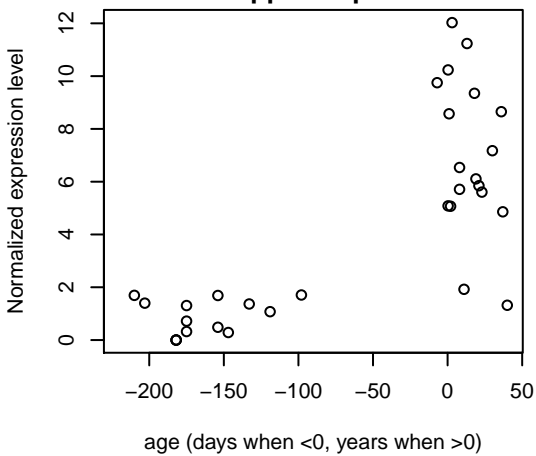

**MYOM1\_3079176\_3079340**  
(P=0, Diff = -4.1)  
**hippocampus**

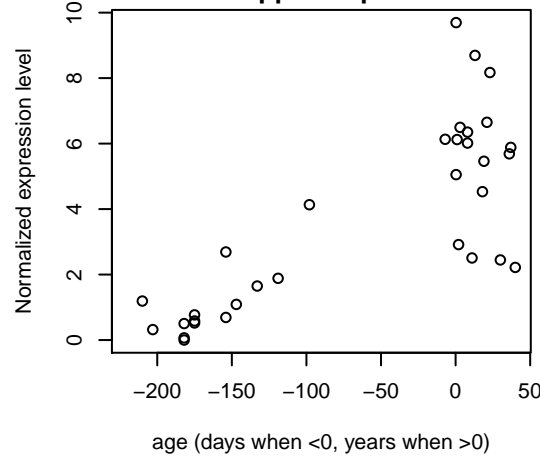

**MYOM1\_3083786\_3083892**  
(P=8e-04, Diff = -2.9)  
**hippocampus**

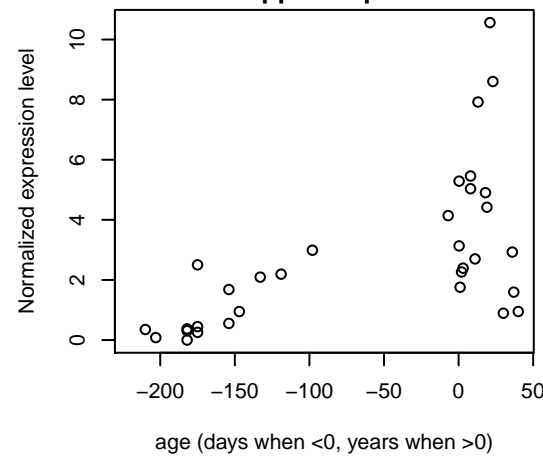

**MYOM1\_3083986\_3084025**  
(P=1e-04, Diff = -3.72)  
**hippocampus**

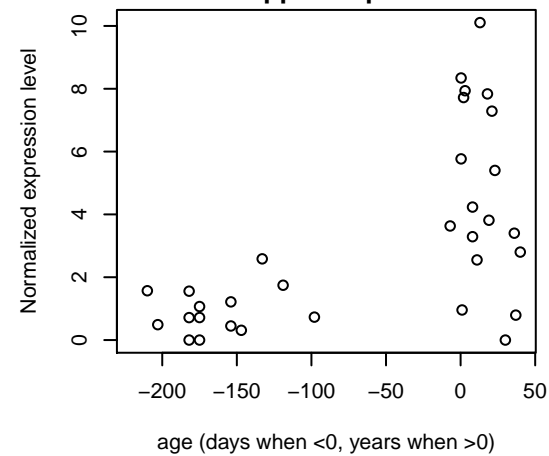

**MYOM1\_3085042\_3085130**  
(P=0, Diff = -3.33)  
**hippocampus**

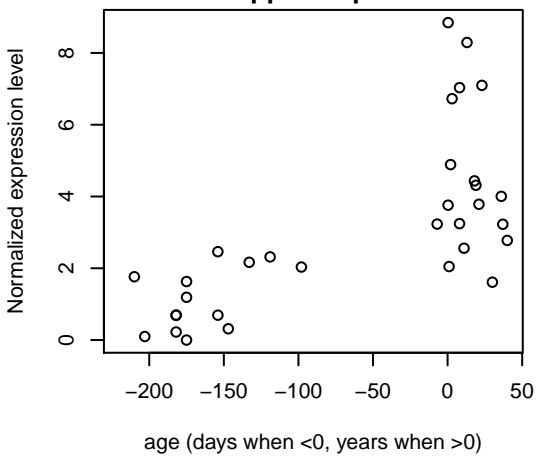

**MYOM1\_3086035\_3086149**  
(P=2e-04, Diff = -3.51)  
**hippocampus**

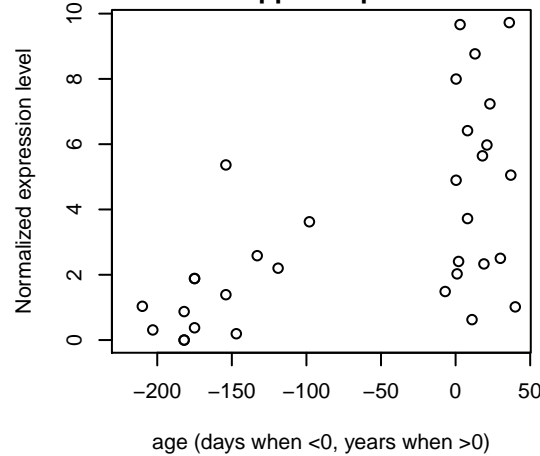

**MYOM1\_3089171\_3089239**  
(P=0.0011, Diff = -2.99)  
**hippocampus**

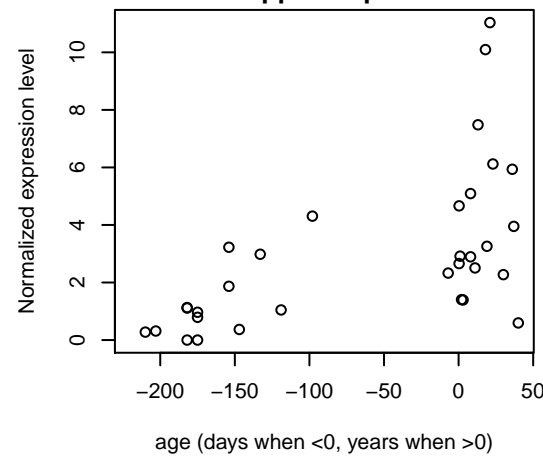

**MYOM1\_3089534\_3089594**  
(P=0.0069, Diff = -2.99)  
**hippocampus**

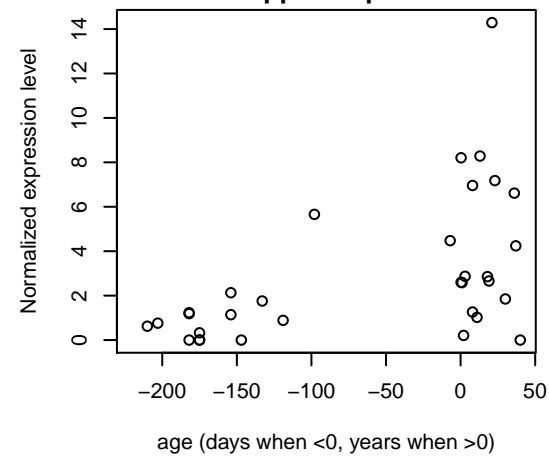

**MYOM1\_3090655\_3090800**  
(P=1e-04, Diff = -3.4)  
**hippocampus**

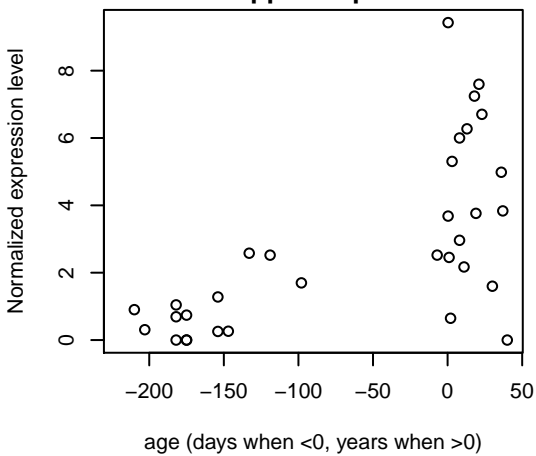

**MYOM1\_3094167\_3094304**  
(P=0.0012, Diff = -1.89)  
**hippocampus**

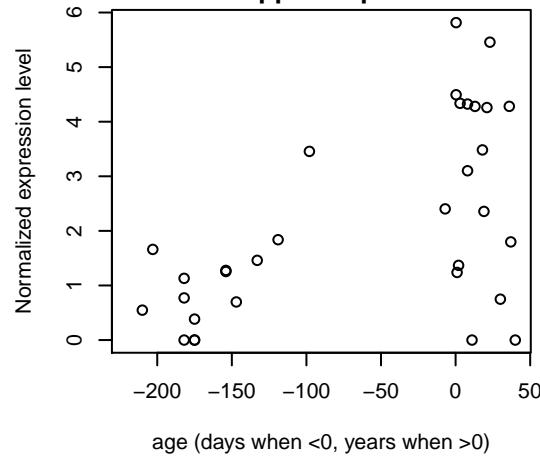

**MYOM1\_3100156\_3100201**  
(P=0.0013, Diff = -1.92)  
**hippocampus**

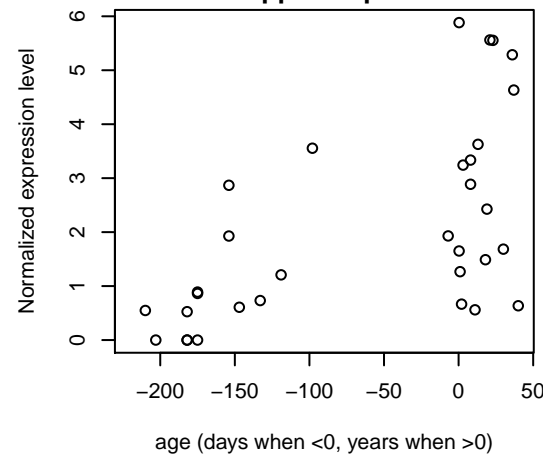

**MYOM1\_3100317\_3100424**  
(P=0, Diff = -2.79)  
**hippocampus**

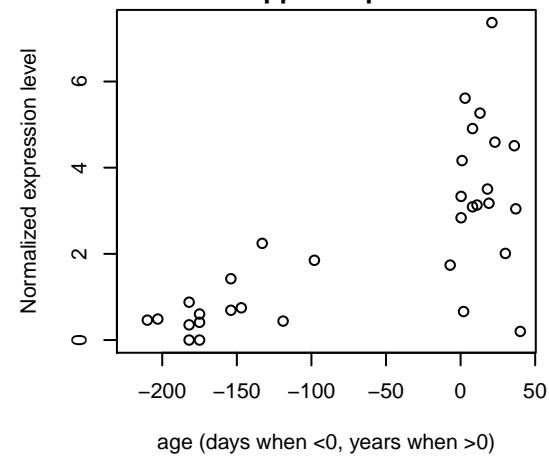



**MYOM1\_3174117\_3174206**  
(P=0.0022, Diff = -1.17)  
hippocampus

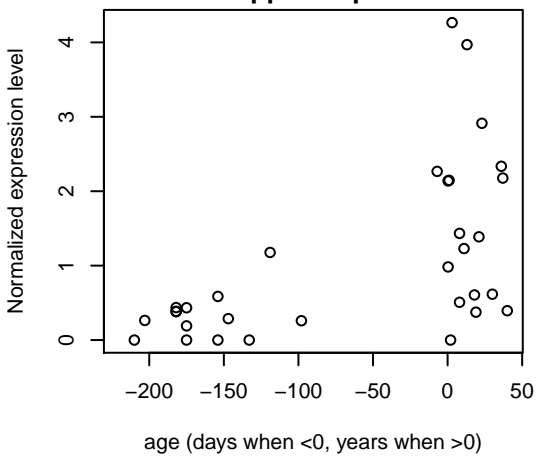

**MYOM1\_3176039\_3176132**  
(P=2e-04, Diff = -0.73)  
hippocampus

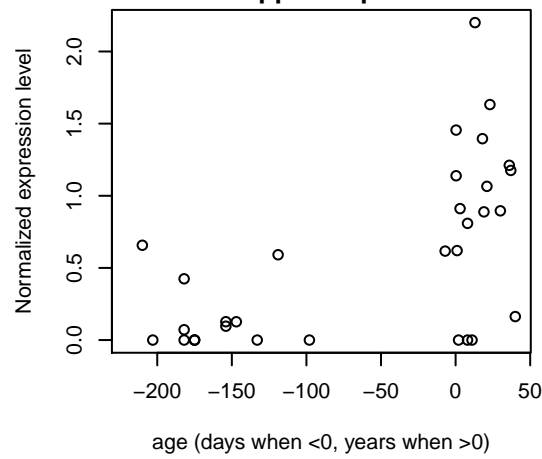

**MYOM1\_3187477\_3187635**  
(P=0.0209, Diff = -0.63)  
hippocampus

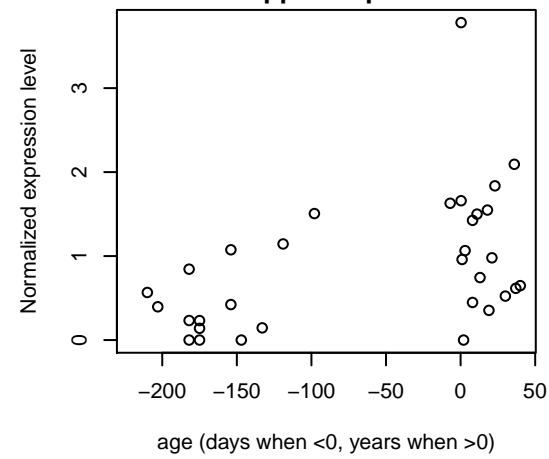

**MYOM1\_3188745\_3189085**  
(P=0.0178, Diff = -0.89)  
hippocampus

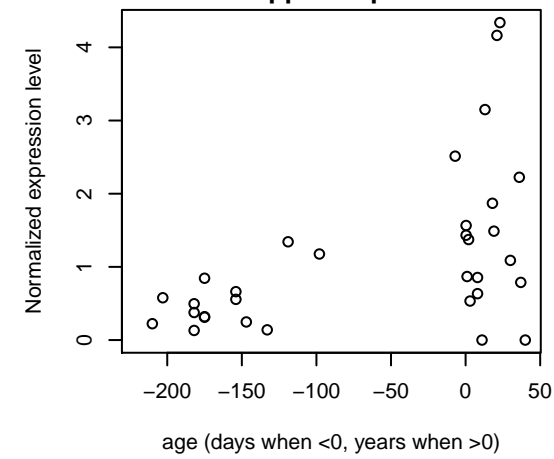

**MYOM1\_3193815\_3193956**  
(P=0.0158, Diff = -0.78)  
hippocampus

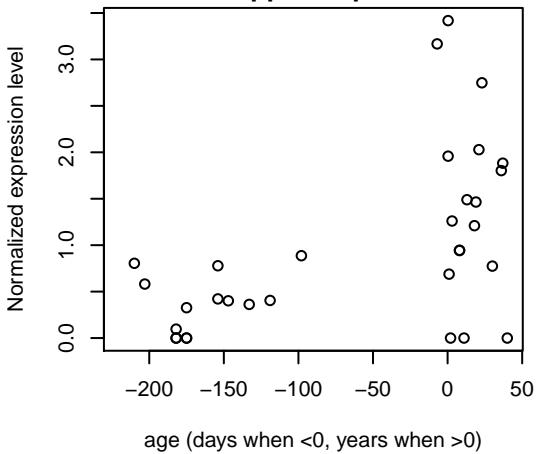

**MYOM1\_3214931\_3215249**  
(P=0.1044, Diff = -0.33)  
hippocampus

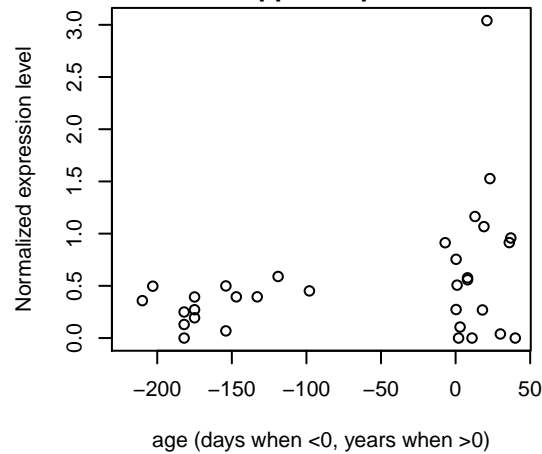

**MYOM1\_3219800\_3220106**  
(P=0.0522, Diff = -0.15)  
hippocampus

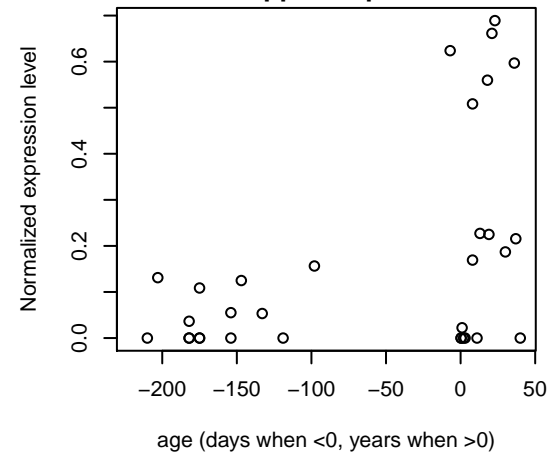

**USP44\_95910335\_95912129**  
(P=0.1457, Diff = 0.16)  
hippocampus

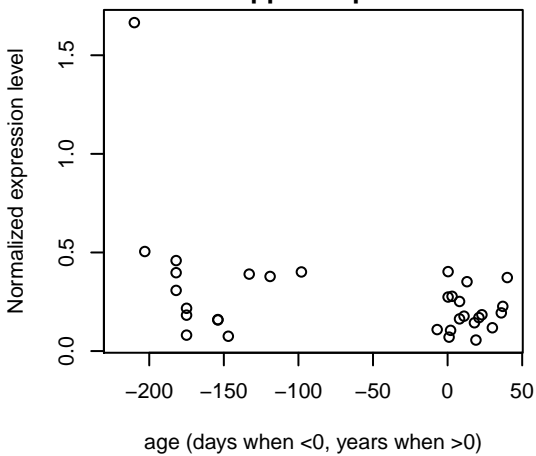

**USP44\_95914772\_95914978**  
(P=0.1069, Diff = 0.14)  
hippocampus

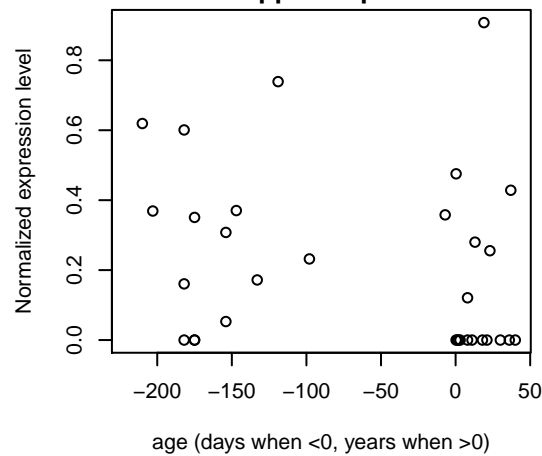

**USP44\_95918295\_95918564**  
(P=0.0043, Diff = 0.07)  
hippocampus

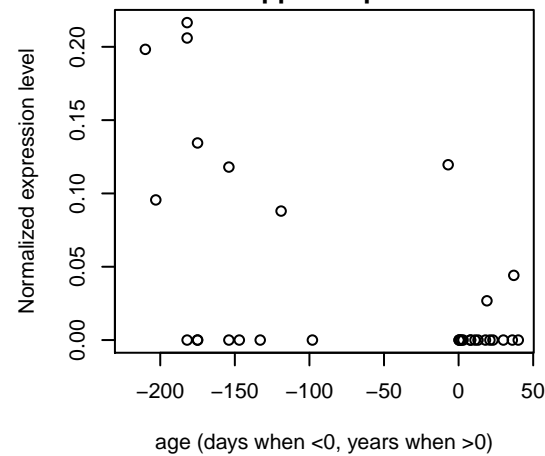

**USP44\_95922582\_95922778**  
(P=0.1573, Diff = 0.1)  
hippocampus

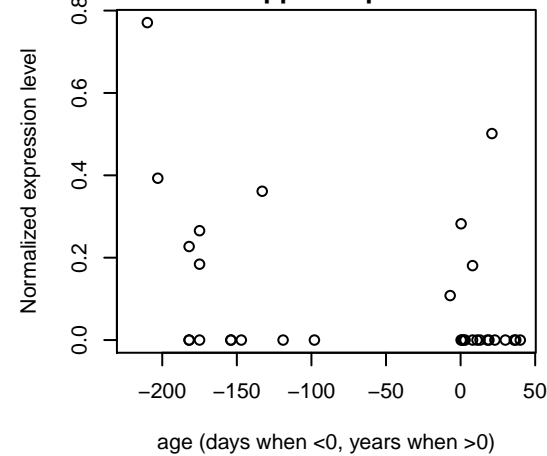

**USP44\_95926604\_95928102**  
(P=0.0478, Diff = 0.17)  
hippocampus

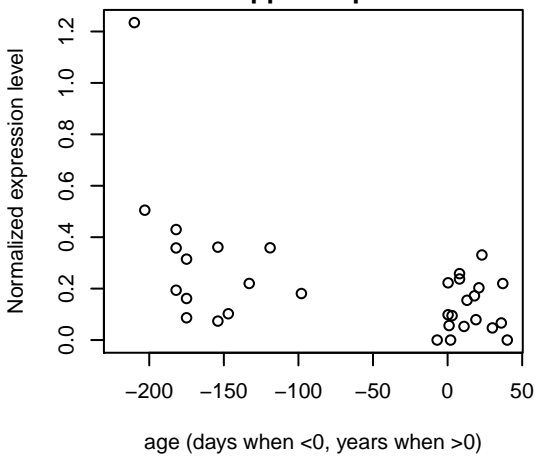

**USP44\_95929148\_95929202**  
(P=NaN, Diff = 0)  
hippocampus

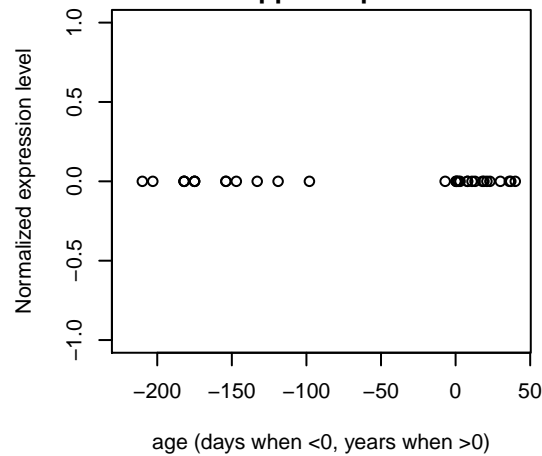

**USP44\_95940225\_95940766**  
(P=0.9183, Diff = 0)  
hippocampus

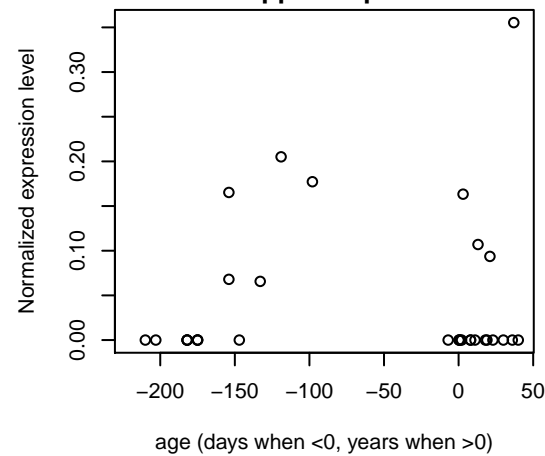

**USP44\_95941758\_95942048**  
(P=0.8411, Diff = 0)  
hippocampus

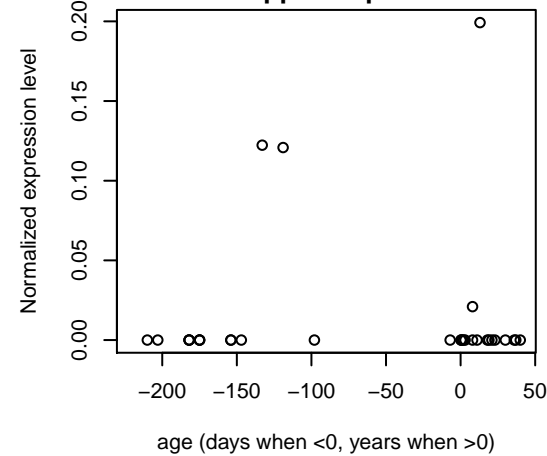

**USP44\_95942301\_95942620**  
(P=0.1516, Diff = 0.05)  
hippocampus

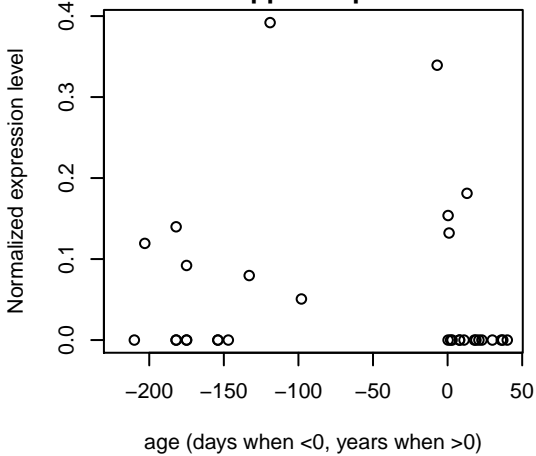

**USP44\_95945047\_95945266**  
(P=NaN, Diff = 0)  
hippocampus

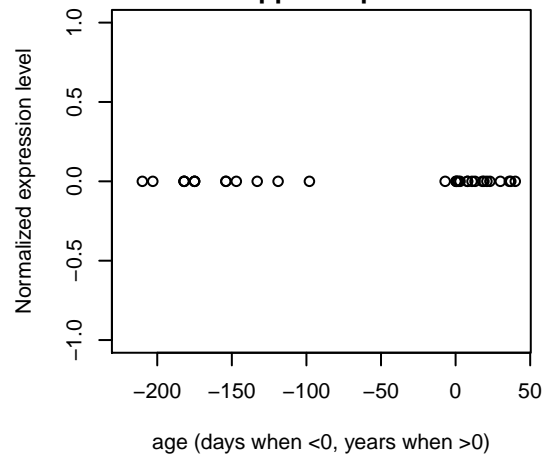

**IGFBP7\_57896938\_57897502**  
(P=0.0028, Diff = -53.52)  
hippocampus

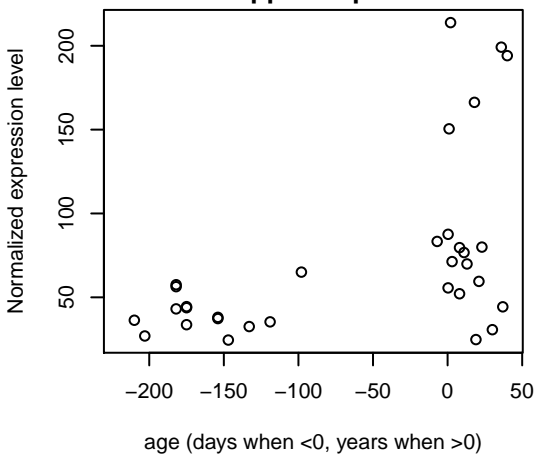

**IGFBP7\_57898203\_57898718**  
(P=0.0015, Diff = -48.32)  
hippocampus

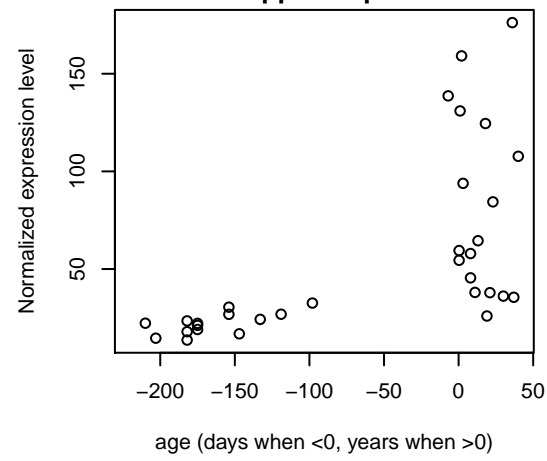

**IGFBP7\_57899360\_57899477**  
(P=0.0165, Diff = -141.5)  
hippocampus

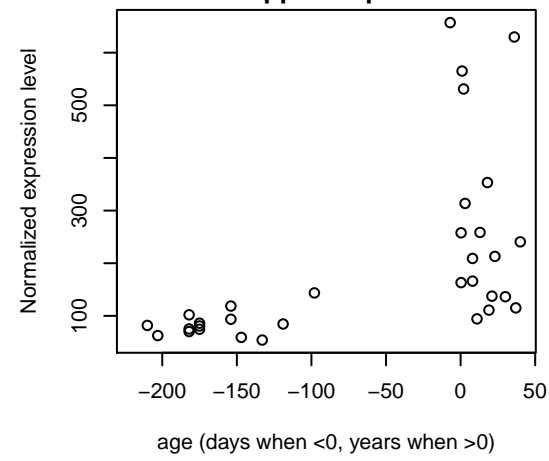

**IGFBP7\_57906989\_57907099**  
(P=0.027, Diff = -140.63)  
hippocampus

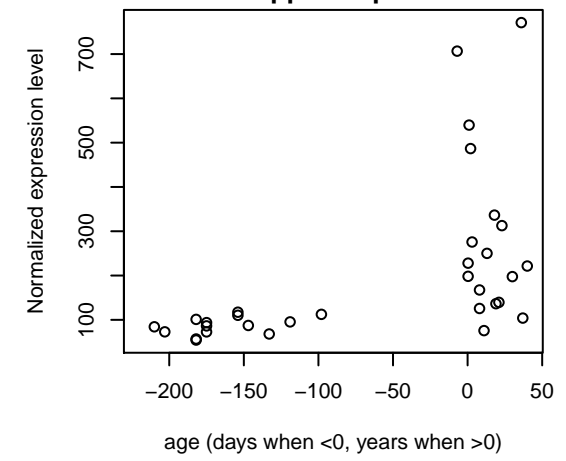

**IGFBP7\_57976042\_57976551**  
(P=0.4973, Diff = -12.89)  
hippocampus

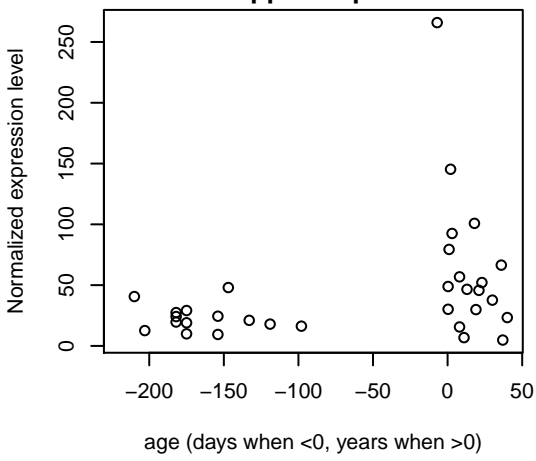

**OPA1\_193310932\_193311198**  
(**P=0.005, Diff = 2.13**)  
**hippocampus**

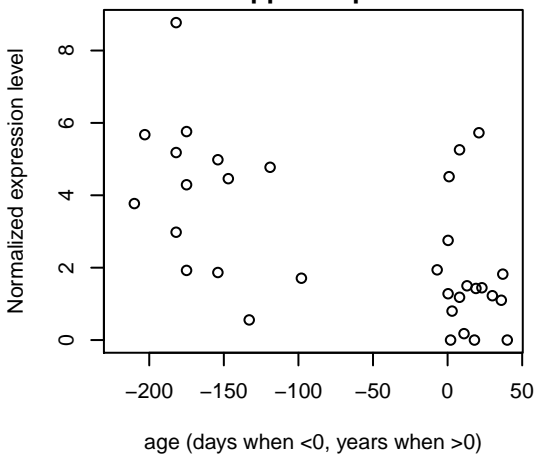

**OPA1\_193321288\_193321346**  
(**P=0.2942, Diff = -0.13**)  
**hippocampus**

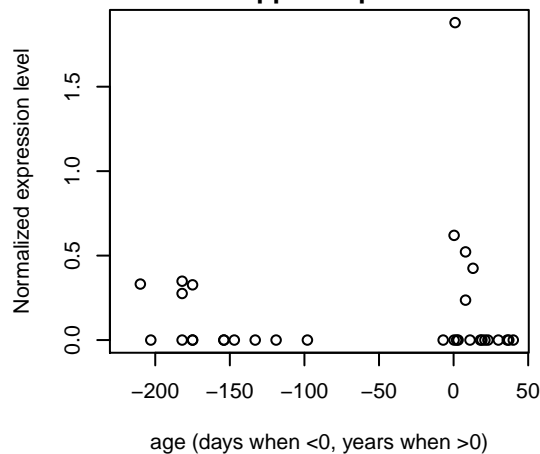

**OPA1\_193332511\_193332830**  
(**P=0.8148, Diff = 0.55**)  
**hippocampus**

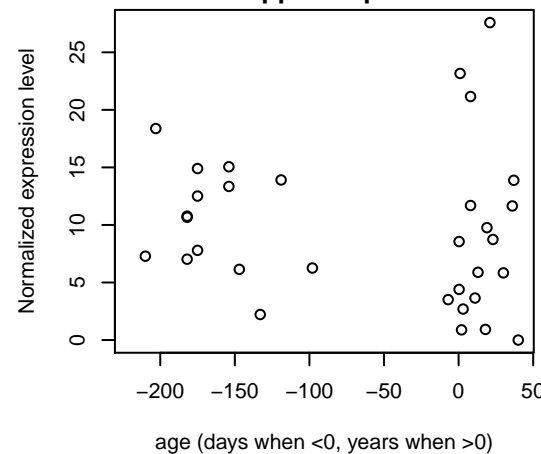

**OPA1\_193333462\_193333559**  
(**P=0.6962, Diff = 1.05**)  
**hippocampus**

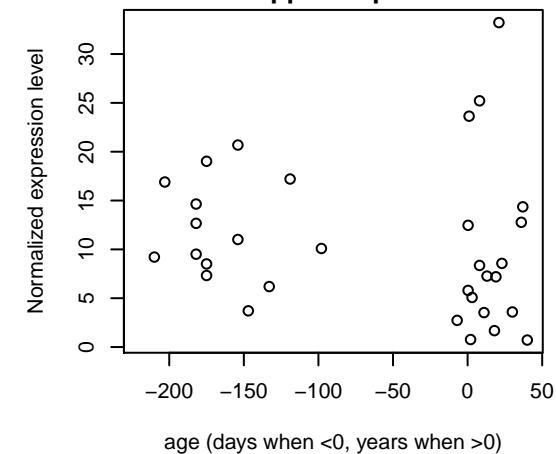

**OPA1\_193334966\_193335074**  
(**P=0.8082, Diff = 0.78**)  
**hippocampus**

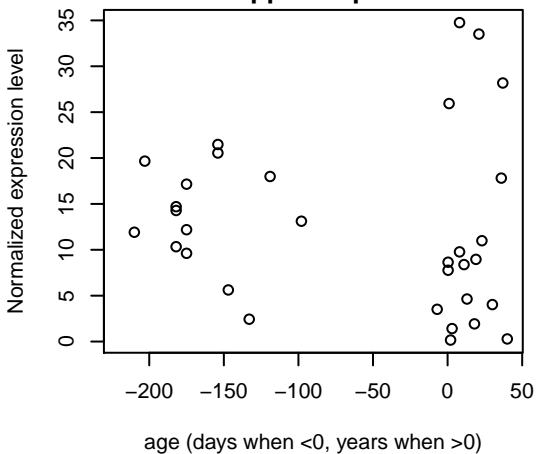

**OPA1\_193335572\_193335626**  
(**P=0.6679, Diff = 0.16**)  
**hippocampus**

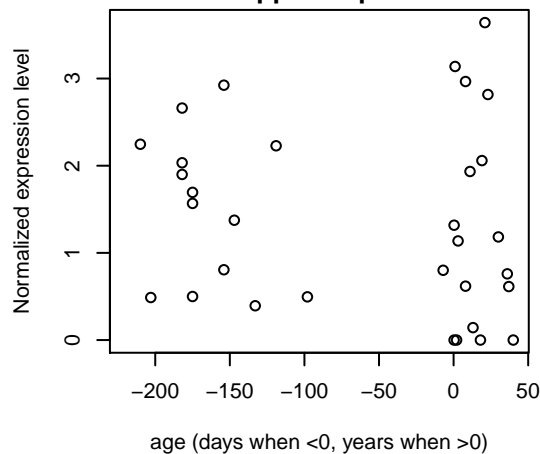

**OPA1\_193336615\_193336726**  
(**P=0.3581, Diff = 1.91**)  
**hippocampus**

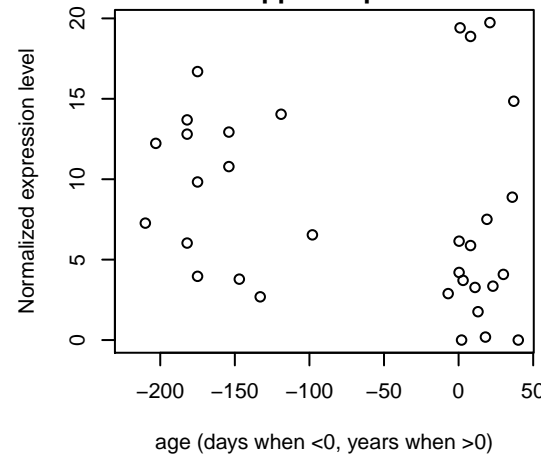

**OPA1\_193343846\_193343991**  
(**P=0.0636, Diff = 1.04**)  
**hippocampus**

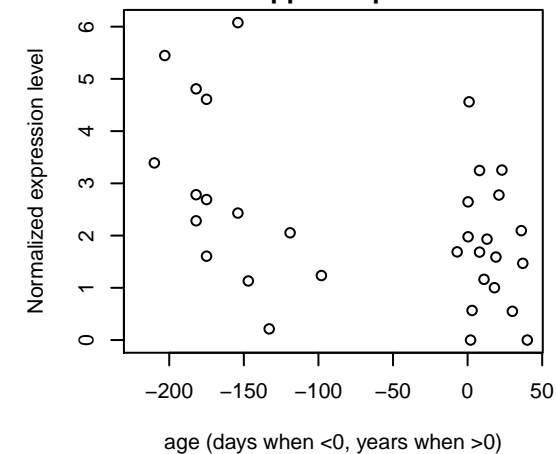

**OPA1\_193346297\_193346333**  
(**P=0.46, Diff = -0.11**)  
**hippocampus**

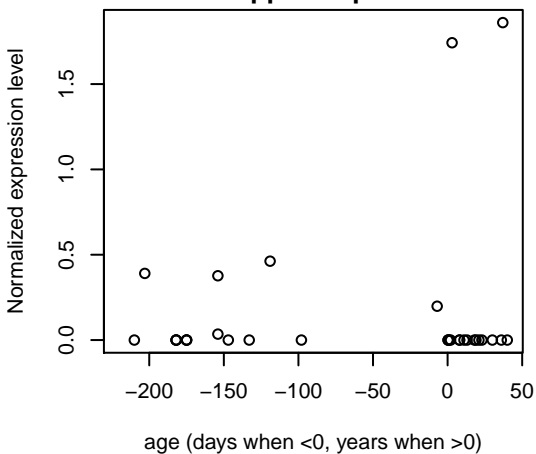

**OPA1\_193349400\_193349454**  
(**P=0.2472, Diff = 3.42**)  
**hippocampus**

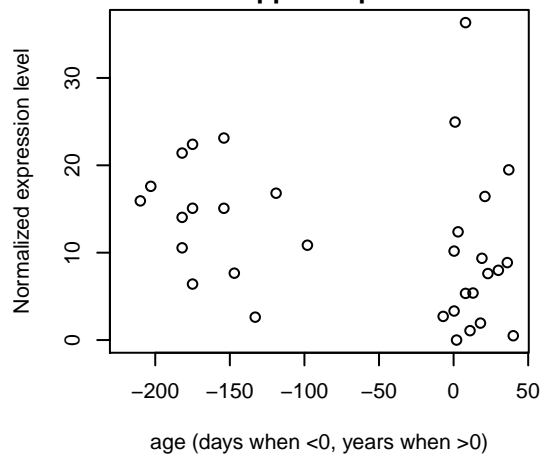

**OPA1\_193353206\_193353311**  
(**P=0.2244, Diff = 2.97**)  
**hippocampus**

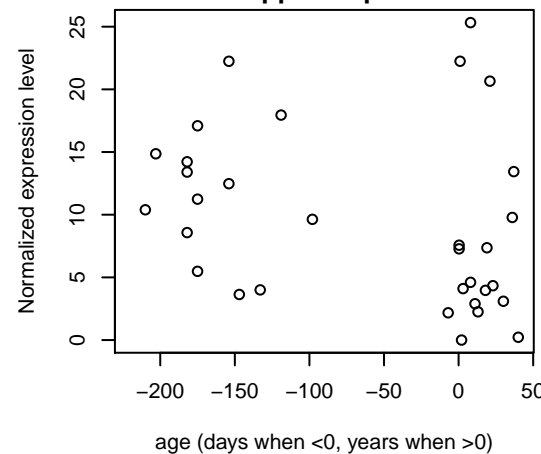

**OPA1\_193354983\_193355070**  
(**P=0.3896, Diff = 3.04**)  
**hippocampus**

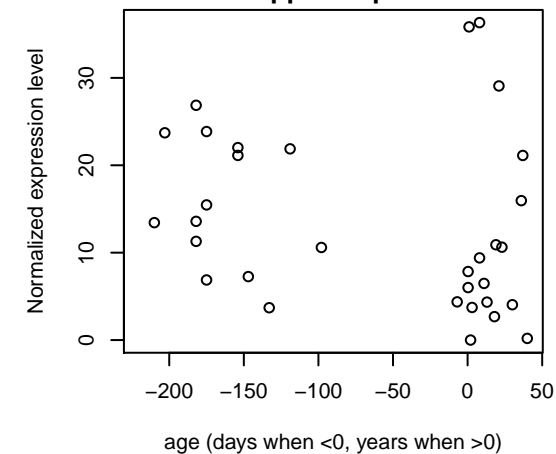

**OPA1\_193355740\_193355854**  
(**P=0.5609, Diff = 2.31**)  
**hippocampus**

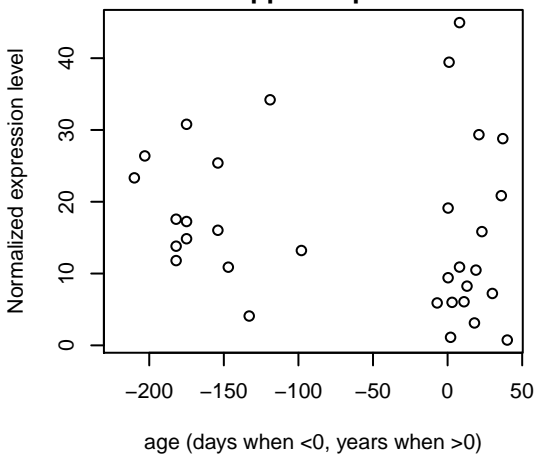

**OPA1\_193360553\_193360634**  
(**P=0.5986, Diff = 1.79**)  
**hippocampus**

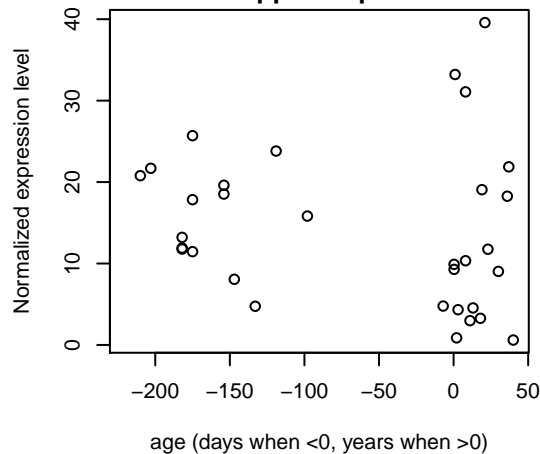

**OPA1\_193360763\_193360838**  
(**P=0.2843, Diff = 3.31**)  
**hippocampus**

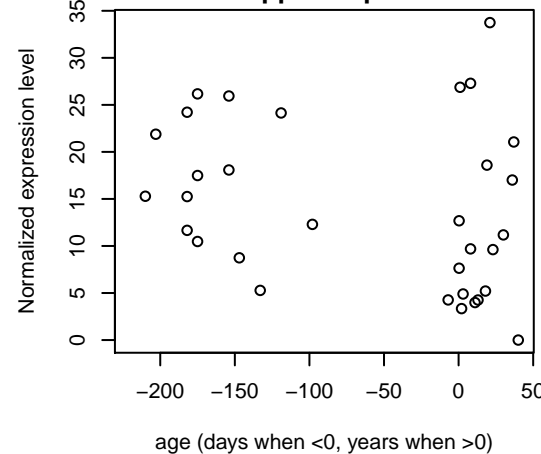

**OPA1\_193361161\_193361233**  
(**P=0.42, Diff = 2.7**)  
**hippocampus**

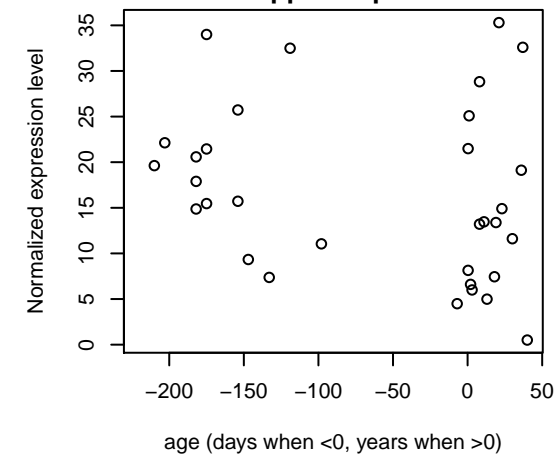

**OPA1\_193361316\_193361416**  
**(P=0.892, Diff = 0.43)**  
**hippocampus**

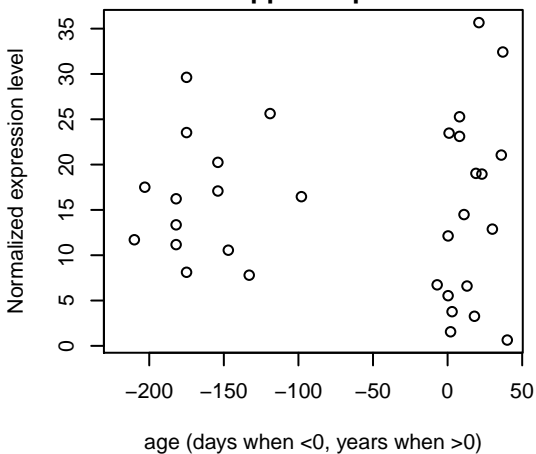

**OPA1\_193361763\_193361940**  
**(P=0.8171, Diff = 0.62)**  
**hippocampus**

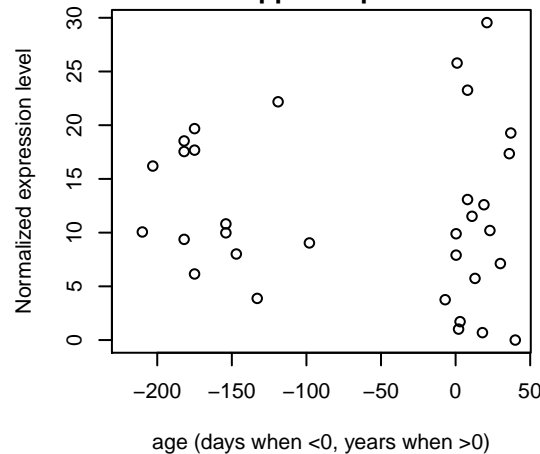

**OPA1\_193363341\_193363414**  
**(P=0.7317, Diff = -1.1)**  
**hippocampus**

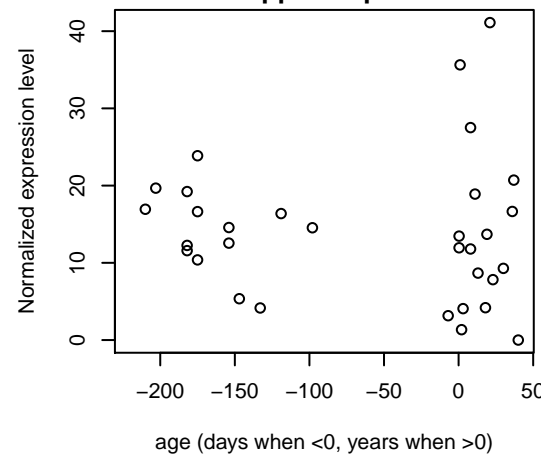

**OPA1\_193363516\_193363589**  
**(P=0.714, Diff = 1.13)**  
**hippocampus**

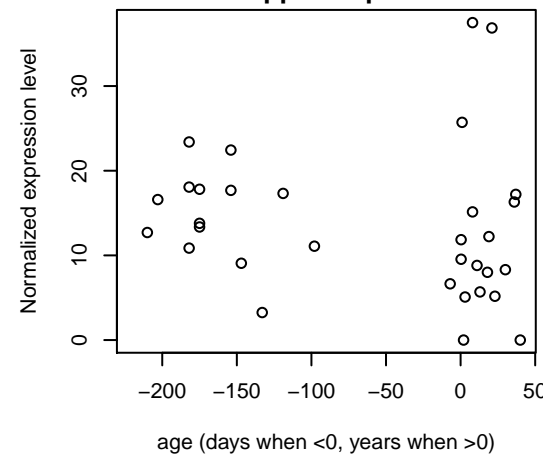

**OPA1\_193364853\_193364969**  
**(P=0.8607, Diff = 0.65)**  
**hippocampus**

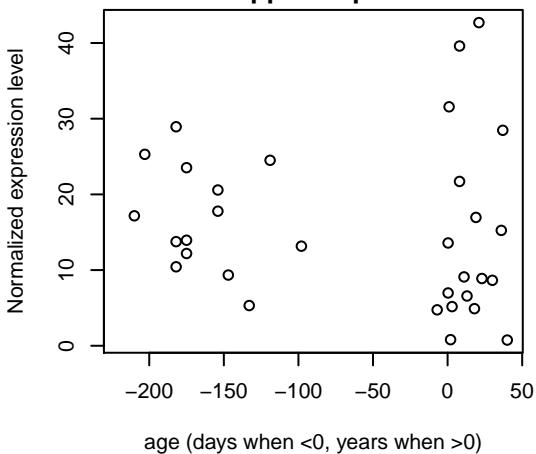

**OPA1\_193365858\_193366249**  
**(P=0.9475, Diff = 0.04)**  
**hippocampus**

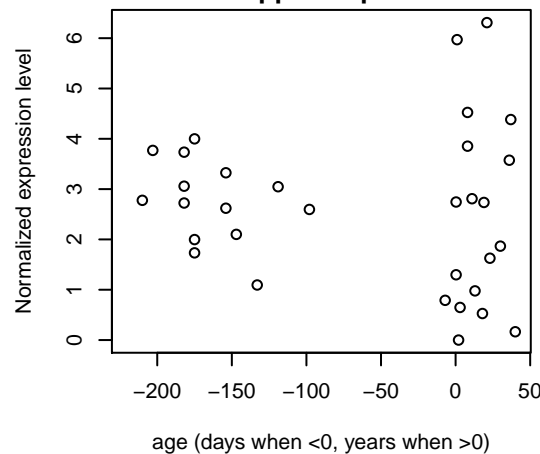

**OPA1\_193366554\_193366660**  
**(P=0.6809, Diff = 1.15)**  
**hippocampus**

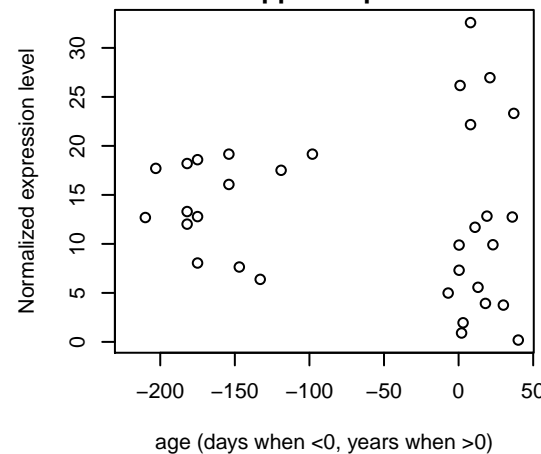

**OPA1\_193372650\_193372816**  
**(P=0.7582, Diff = 1.35)**  
**hippocampus**

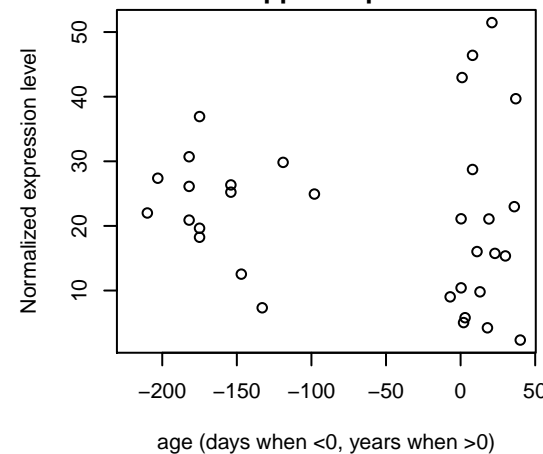

**OPA1\_193374868\_193375021**  
**(P=0.9718, Diff = 0.15)**  
**hippocampus**

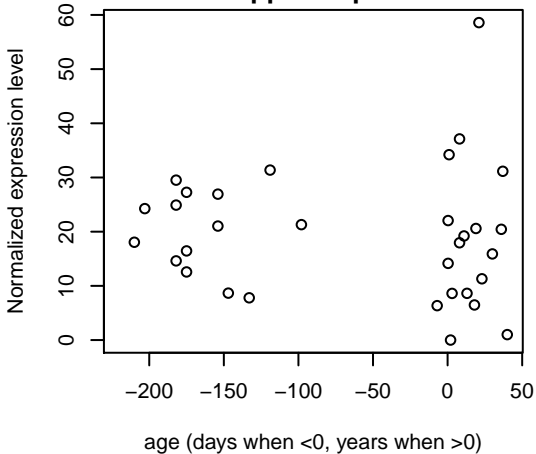

**OPA1\_193376675\_193376784**  
**(P=0.5985, Diff = 2.77)**  
**hippocampus**

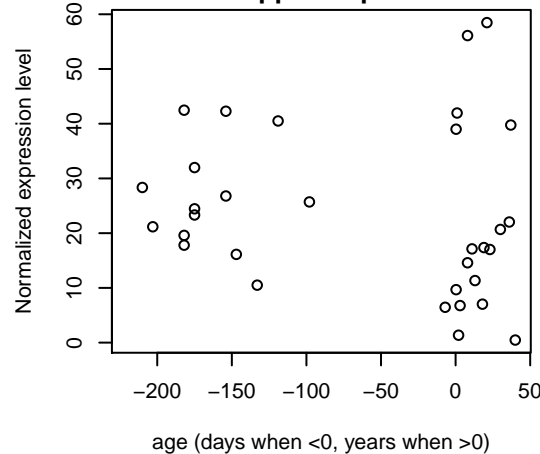

**OPA1\_193377270\_193377350**  
**(P=0.6311, Diff = -2.2)**  
**hippocampus**

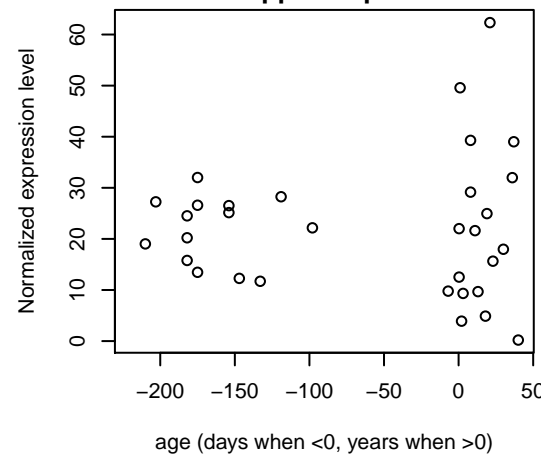

**OPA1\_193380610\_193380751**  
**(P=0.8466, Diff = -1.14)**  
**hippocampus**

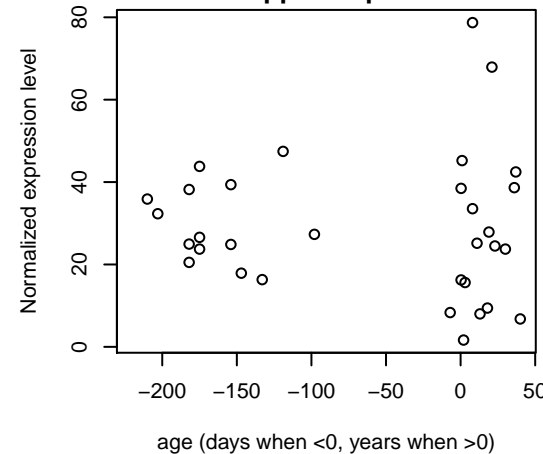

**OPA1\_193382668\_193382785**  
**(P=0.7517, Diff = -1.42)**  
**hippocampus**

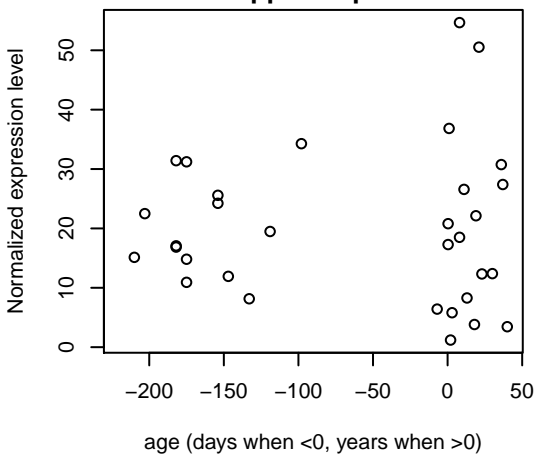

**OPA1\_193384084\_193384178**  
**(P=0.6573, Diff = -2.16)**  
**hippocampus**

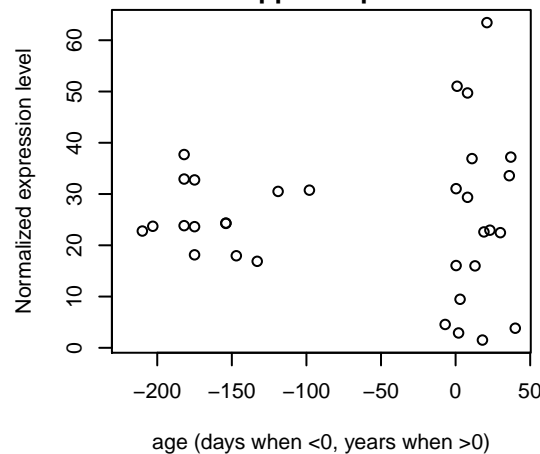

**OPA1\_193384958\_193385069**  
**(P=0.4187, Diff = -2.96)**  
**hippocampus**

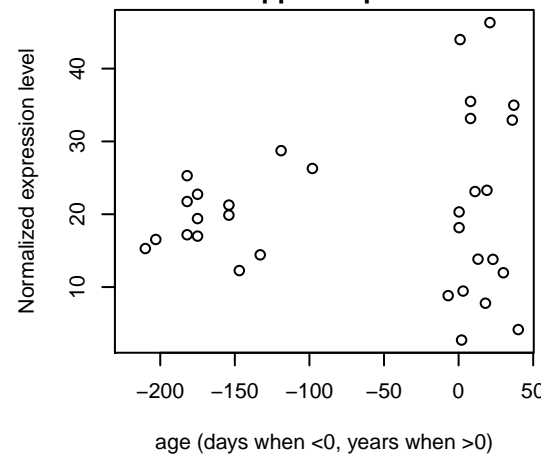

**OPA1\_193385159\_193385244**  
**(P=0.2655, Diff = -0.07)**  
**hippocampus**

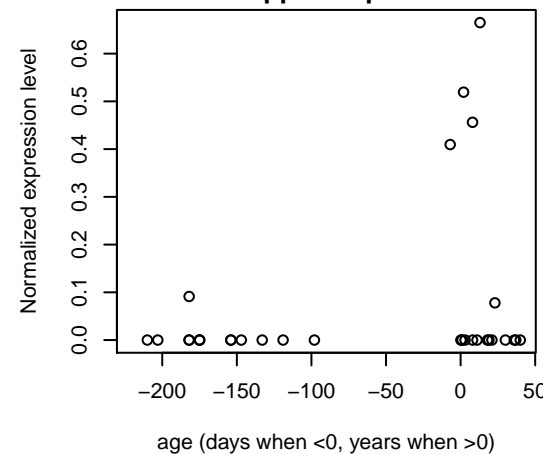

**OPA1\_193386103\_193386720**  
(P=0.9692, Diff = 0)  
hippocampus

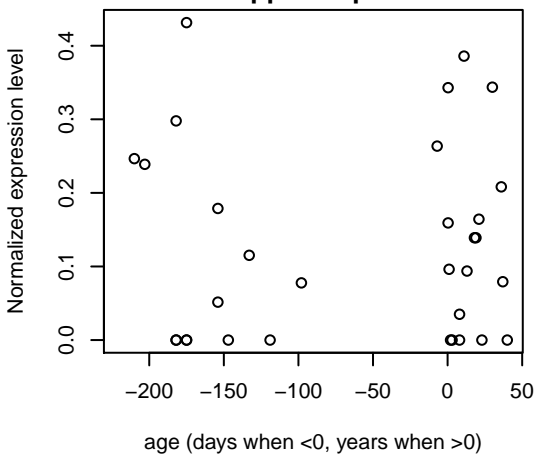

**OPA1\_193409182\_193409921**  
(P=0.4771, Diff = -0.3)  
hippocampus

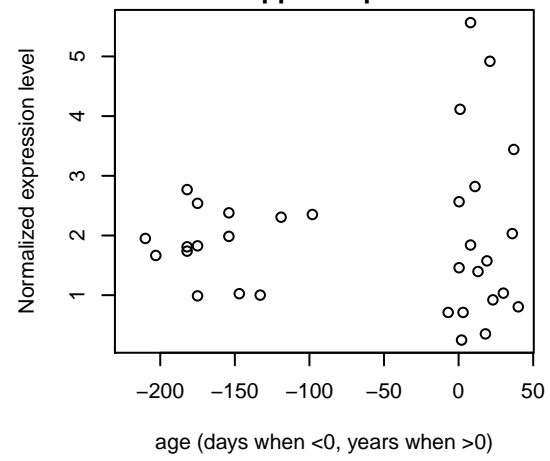

**OPA1\_193412394\_193415612**  
(P=0.0486, Diff = -6.86)  
hippocampus

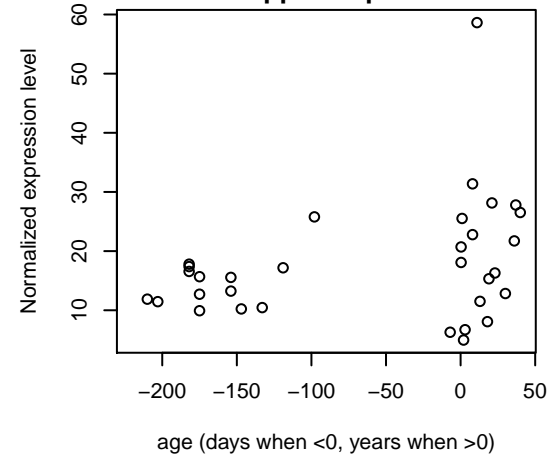



**ZMAT4\_40388108\_40389757**  
(P=0, Diff = -5.37)  
hippocampus

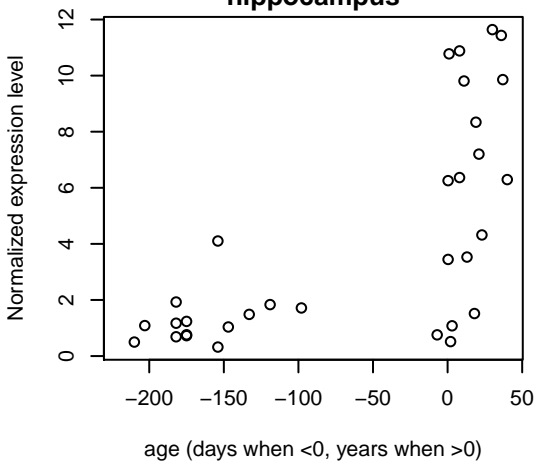

**ZMAT4\_40438683\_40438780**  
(P=4e-04, Diff = -5.55)  
hippocampus

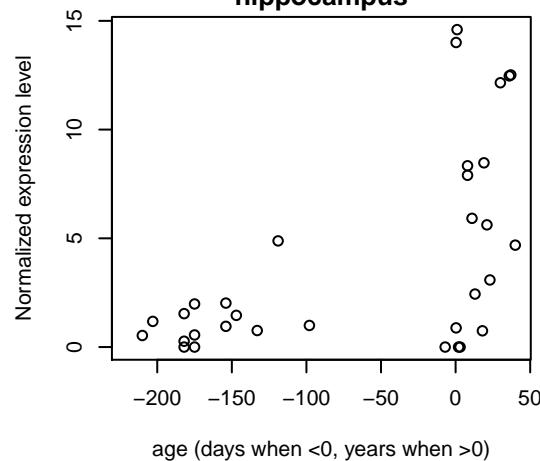

**ZMAT4\_40531882\_40532450**  
(P=0.0022, Diff = -1.19)  
hippocampus

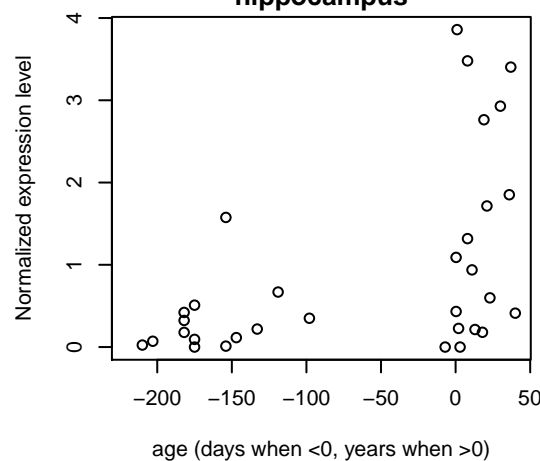

**ZMAT4\_40554514\_40554920**  
(P=0.0059, Diff = -1.34)  
hippocampus

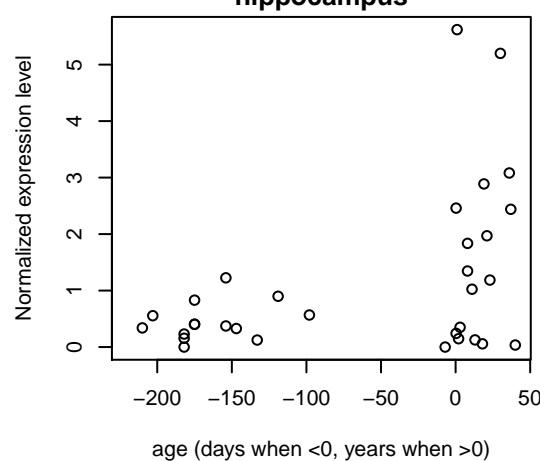

**ZMAT4\_40625159\_40625249**  
(P=0.0221, Diff = -3.14)  
hippocampus

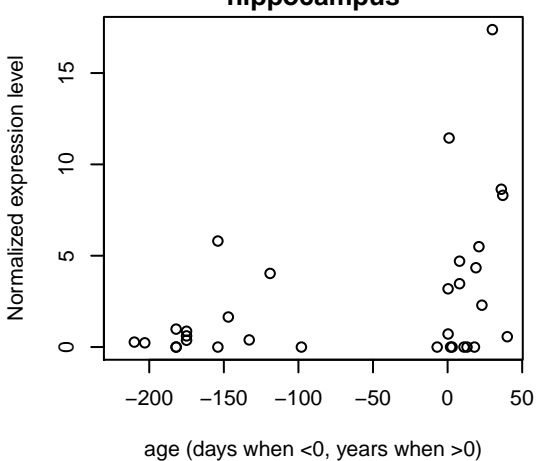

**ZMAT4\_40644207\_40644301**  
(P=0.115, Diff = -0.07)  
hippocampus

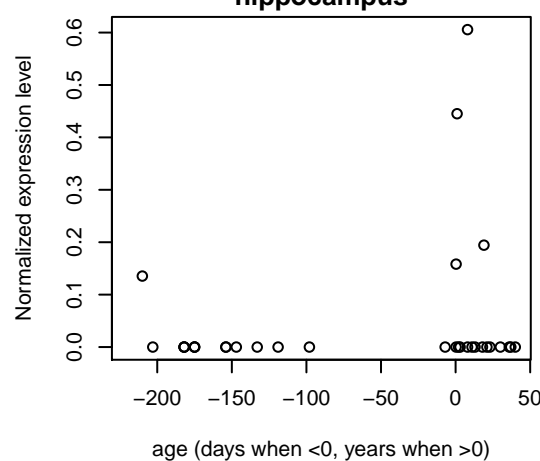

**ZMAT4\_40666027\_40666090**  
(P=0.324, Diff = -0.16)  
hippocampus

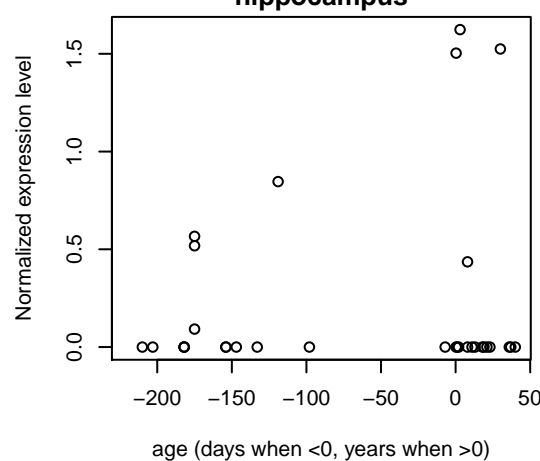

**ZMAT4\_40683093\_40683199**  
(P=0.0164, Diff = -2.99)  
hippocampus

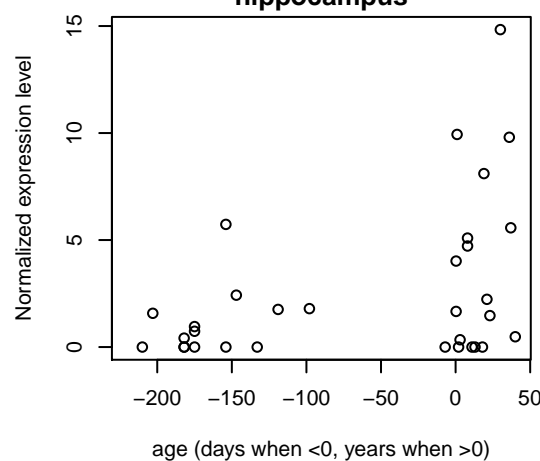

**ZMAT4\_40742047\_40742463**  
(P=0.0016, Diff = -0.15)  
hippocampus

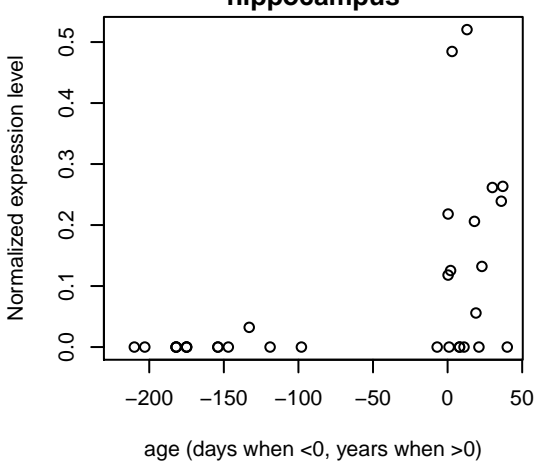

**ZMAT4\_40746013\_40746064**  
(P=0.3322, Diff = -0.04)  
hippocampus

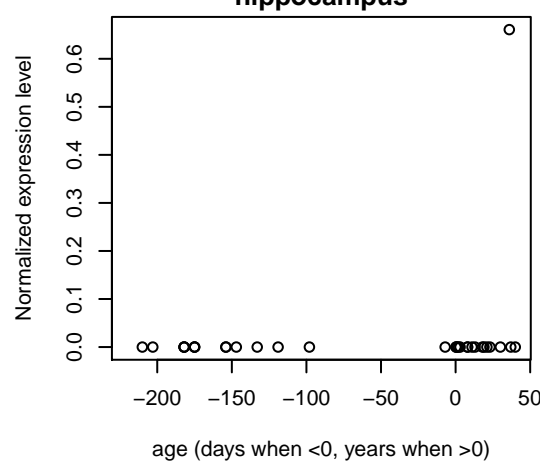

**ZMAT4\_40755201\_40755352**  
(P=0.1067, Diff = -0.79)  
hippocampus

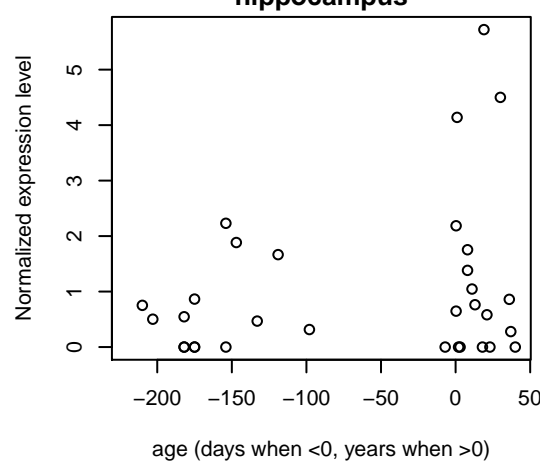

**CNDP1\_72201674\_72201926**  
(P=1e-04, Diff = -11.21)  
hippocampus

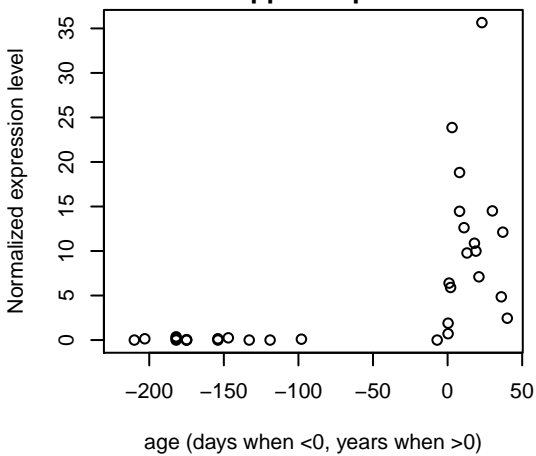

**CNDP1\_72223572\_72223701**  
(P=2e-04, Diff = -27.14)  
hippocampus

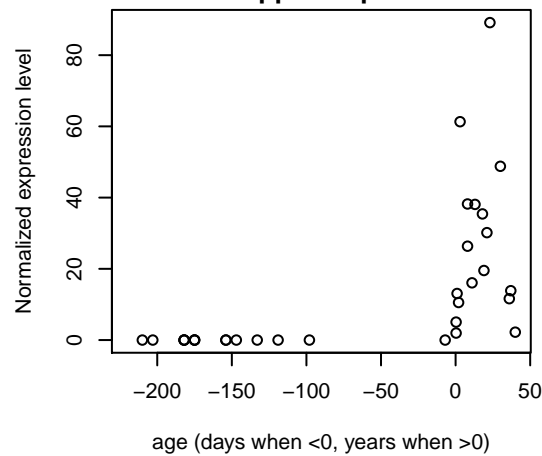

**CNDP1\_72226557\_72226707**  
(P=0, Diff = -26.54)  
hippocampus

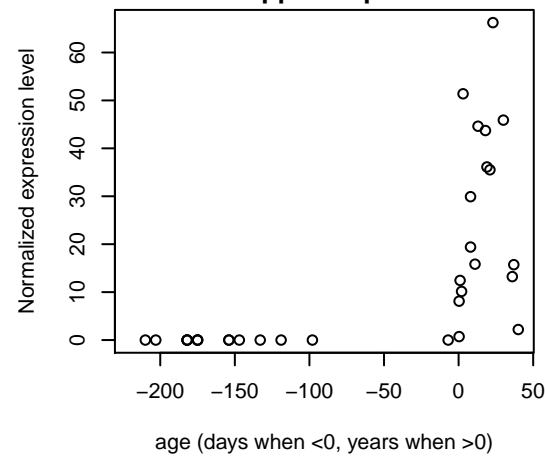

**CNDP1\_72228090\_72228253**  
(P=1e-04, Diff = -35.34)  
hippocampus

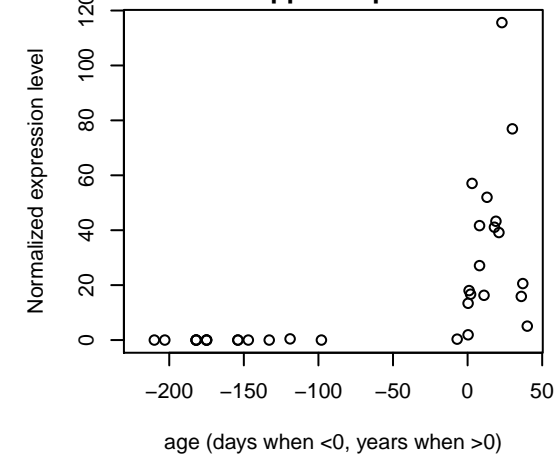

**CNDP1\_72229281\_72229370**  
(P=1e-04, Diff = -53.23)  
hippocampus

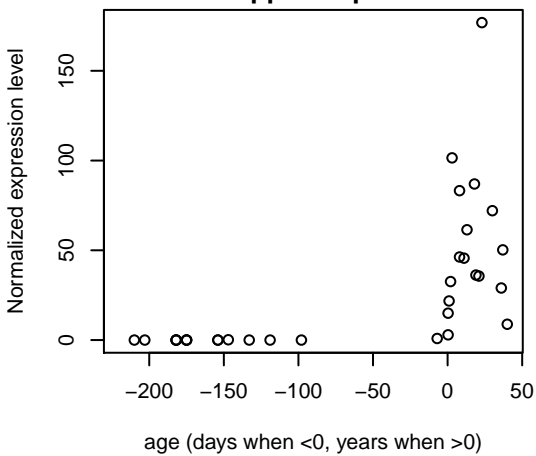

**CNDP1\_72234467\_72234668**  
(P=0, Diff = -60.68)  
hippocampus

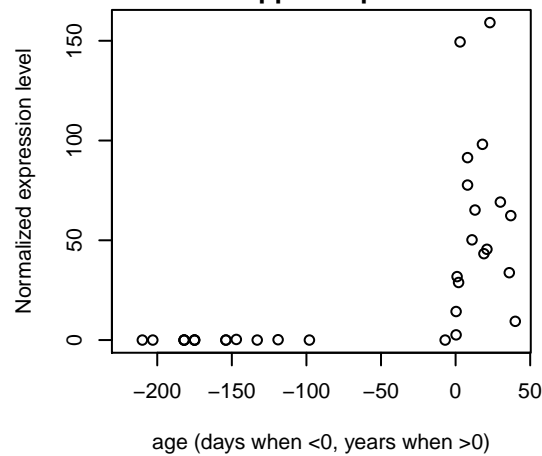

**CNDP1\_72238420\_72238505**  
(P=1e-04, Diff = -65.18)  
hippocampus

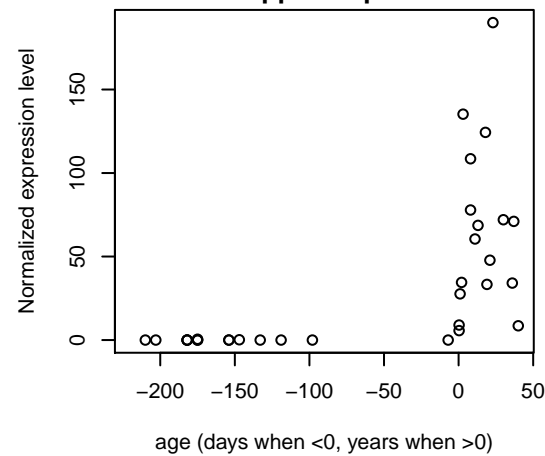

**CNDP1\_72244103\_72244264**  
(P=0, Diff = -45.19)  
hippocampus

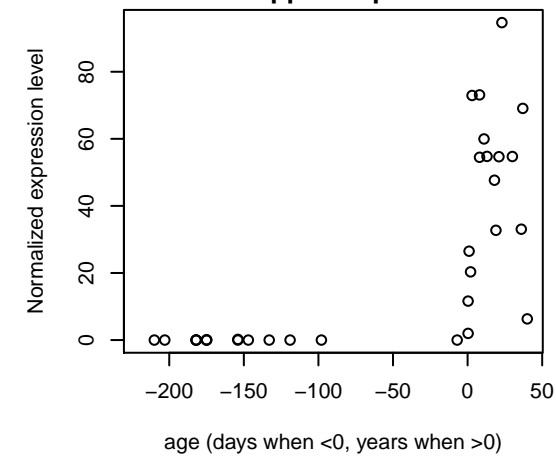

**CNDP1\_72245397\_72245562**  
(P=0, Diff = -58.73)  
hippocampus

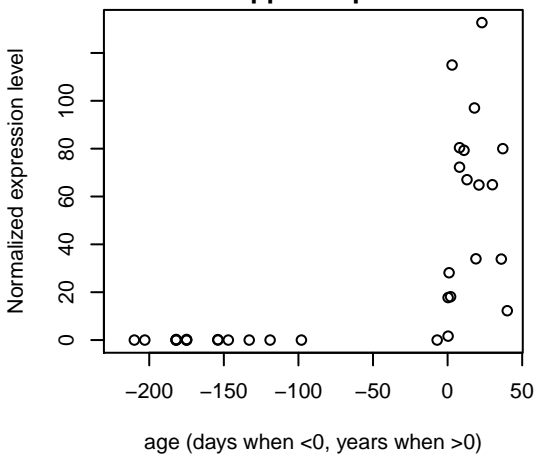

**CNDP1\_72247365\_72247507**  
(P=0, Diff = -73.47)  
hippocampus

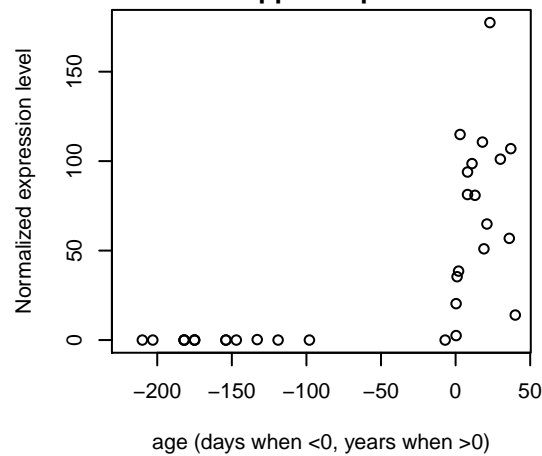

**CNDP1\_72250796\_72250944**  
(P=0, Diff = -67.66)  
hippocampus

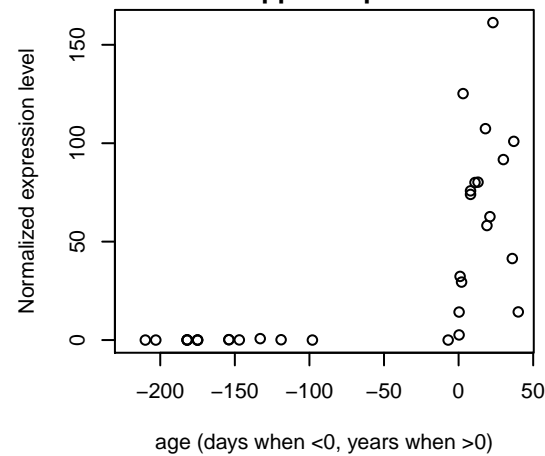

**CNDP1\_72251731\_72252261**  
(P=0, Diff = -44.65)  
hippocampus

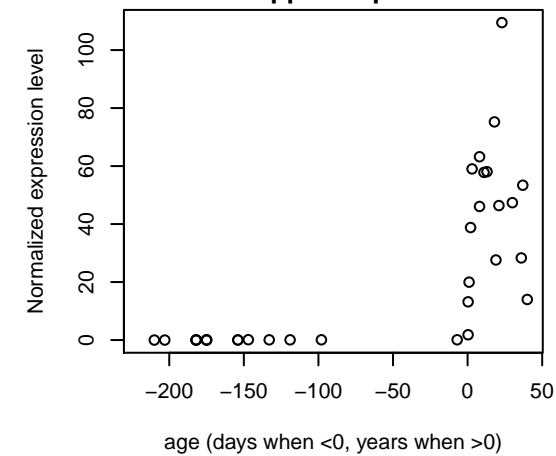

**TOX3\_52471917\_52473880**  
( $P=1e-04$ , Diff = 10.19)  
hippocampus

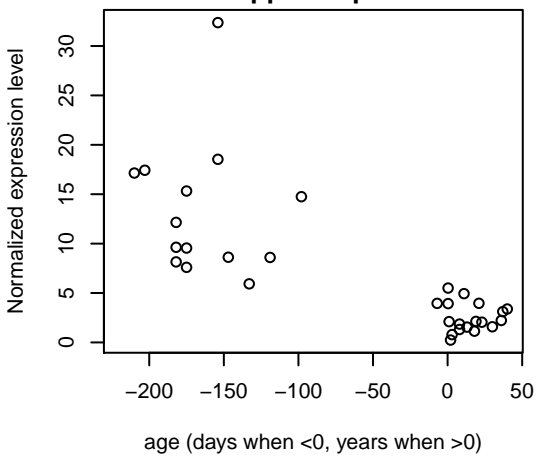

**TOX3\_52478187\_52478268**  
( $P=4e-04$ , Diff = 13.26)  
hippocampus

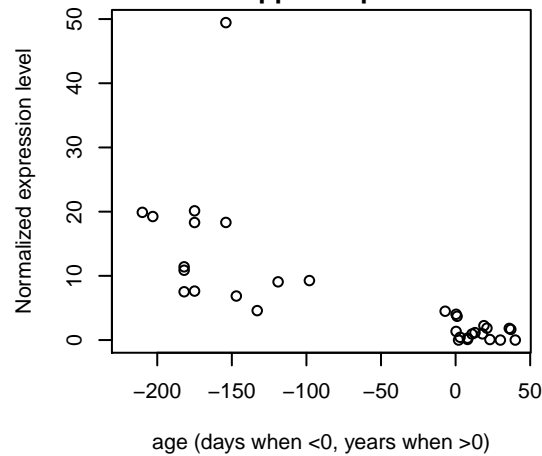

**TOX3\_52479905\_52480133**  
( $P=2e-04$ , Diff = 10.61)  
hippocampus

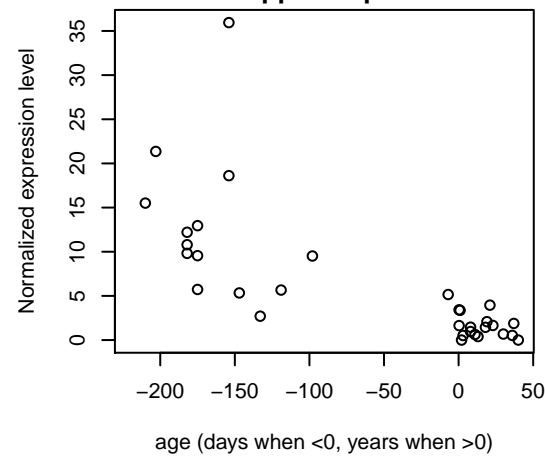

**TOX3\_52484188\_52484458**  
( $P=1e-04$ , Diff = 11.25)  
hippocampus

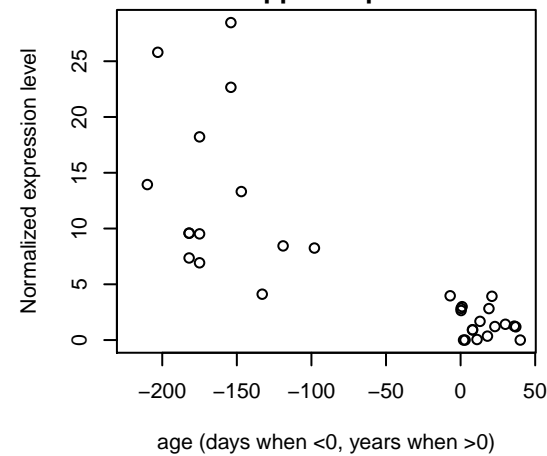

**TOX3\_52497845\_52498100**  
( $P=5e-04$ , Diff = 13.51)  
hippocampus

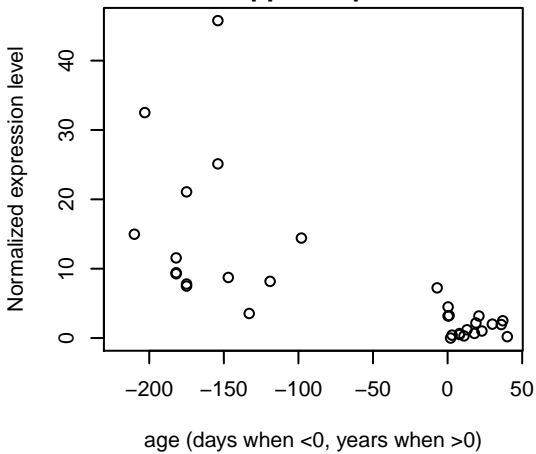

**TOX3\_52502420\_52502486**  
( $P=2e-04$ , Diff = 8.54)  
hippocampus

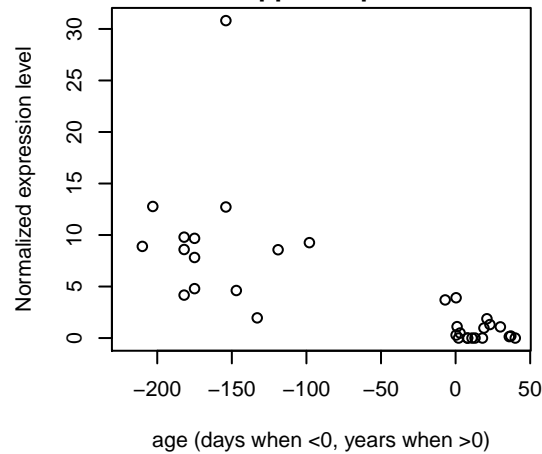

**TOX3\_52553317\_52553491**  
( $P=0.0242$ , Diff = 0.13)  
hippocampus

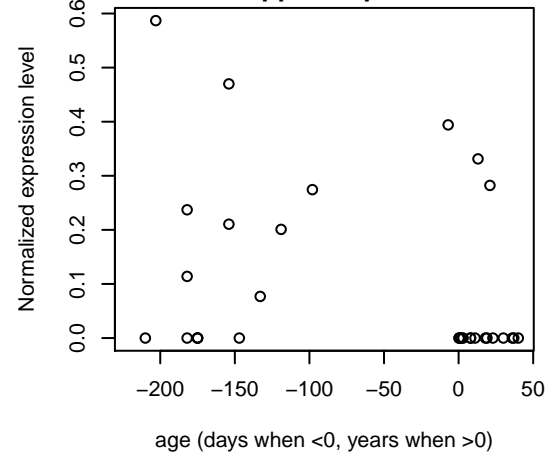

**TOX3\_52580548\_52580806**  
( $P=0.0011$ , Diff = 3.25)  
hippocampus

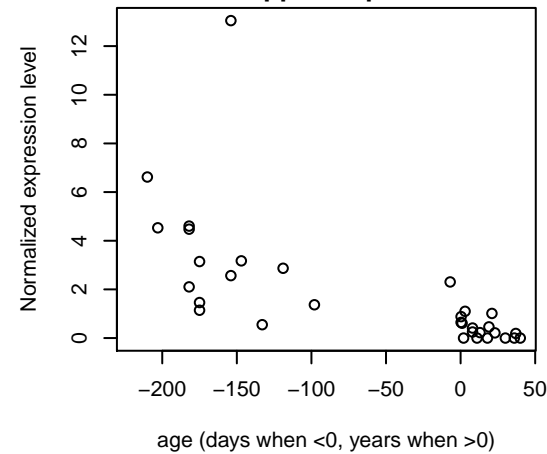

**TOX3\_52581625\_52581714**  
( $P=0.847$ , Diff = 0.01)  
hippocampus

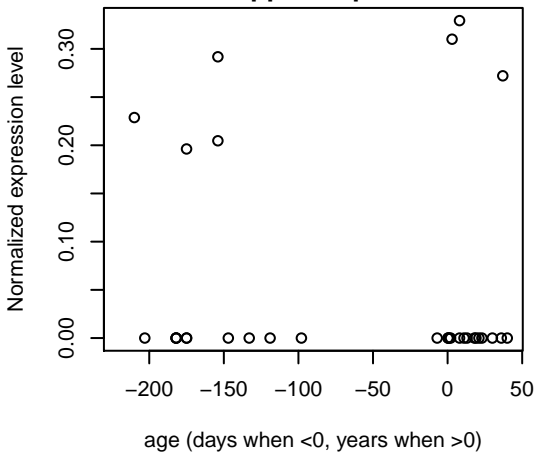

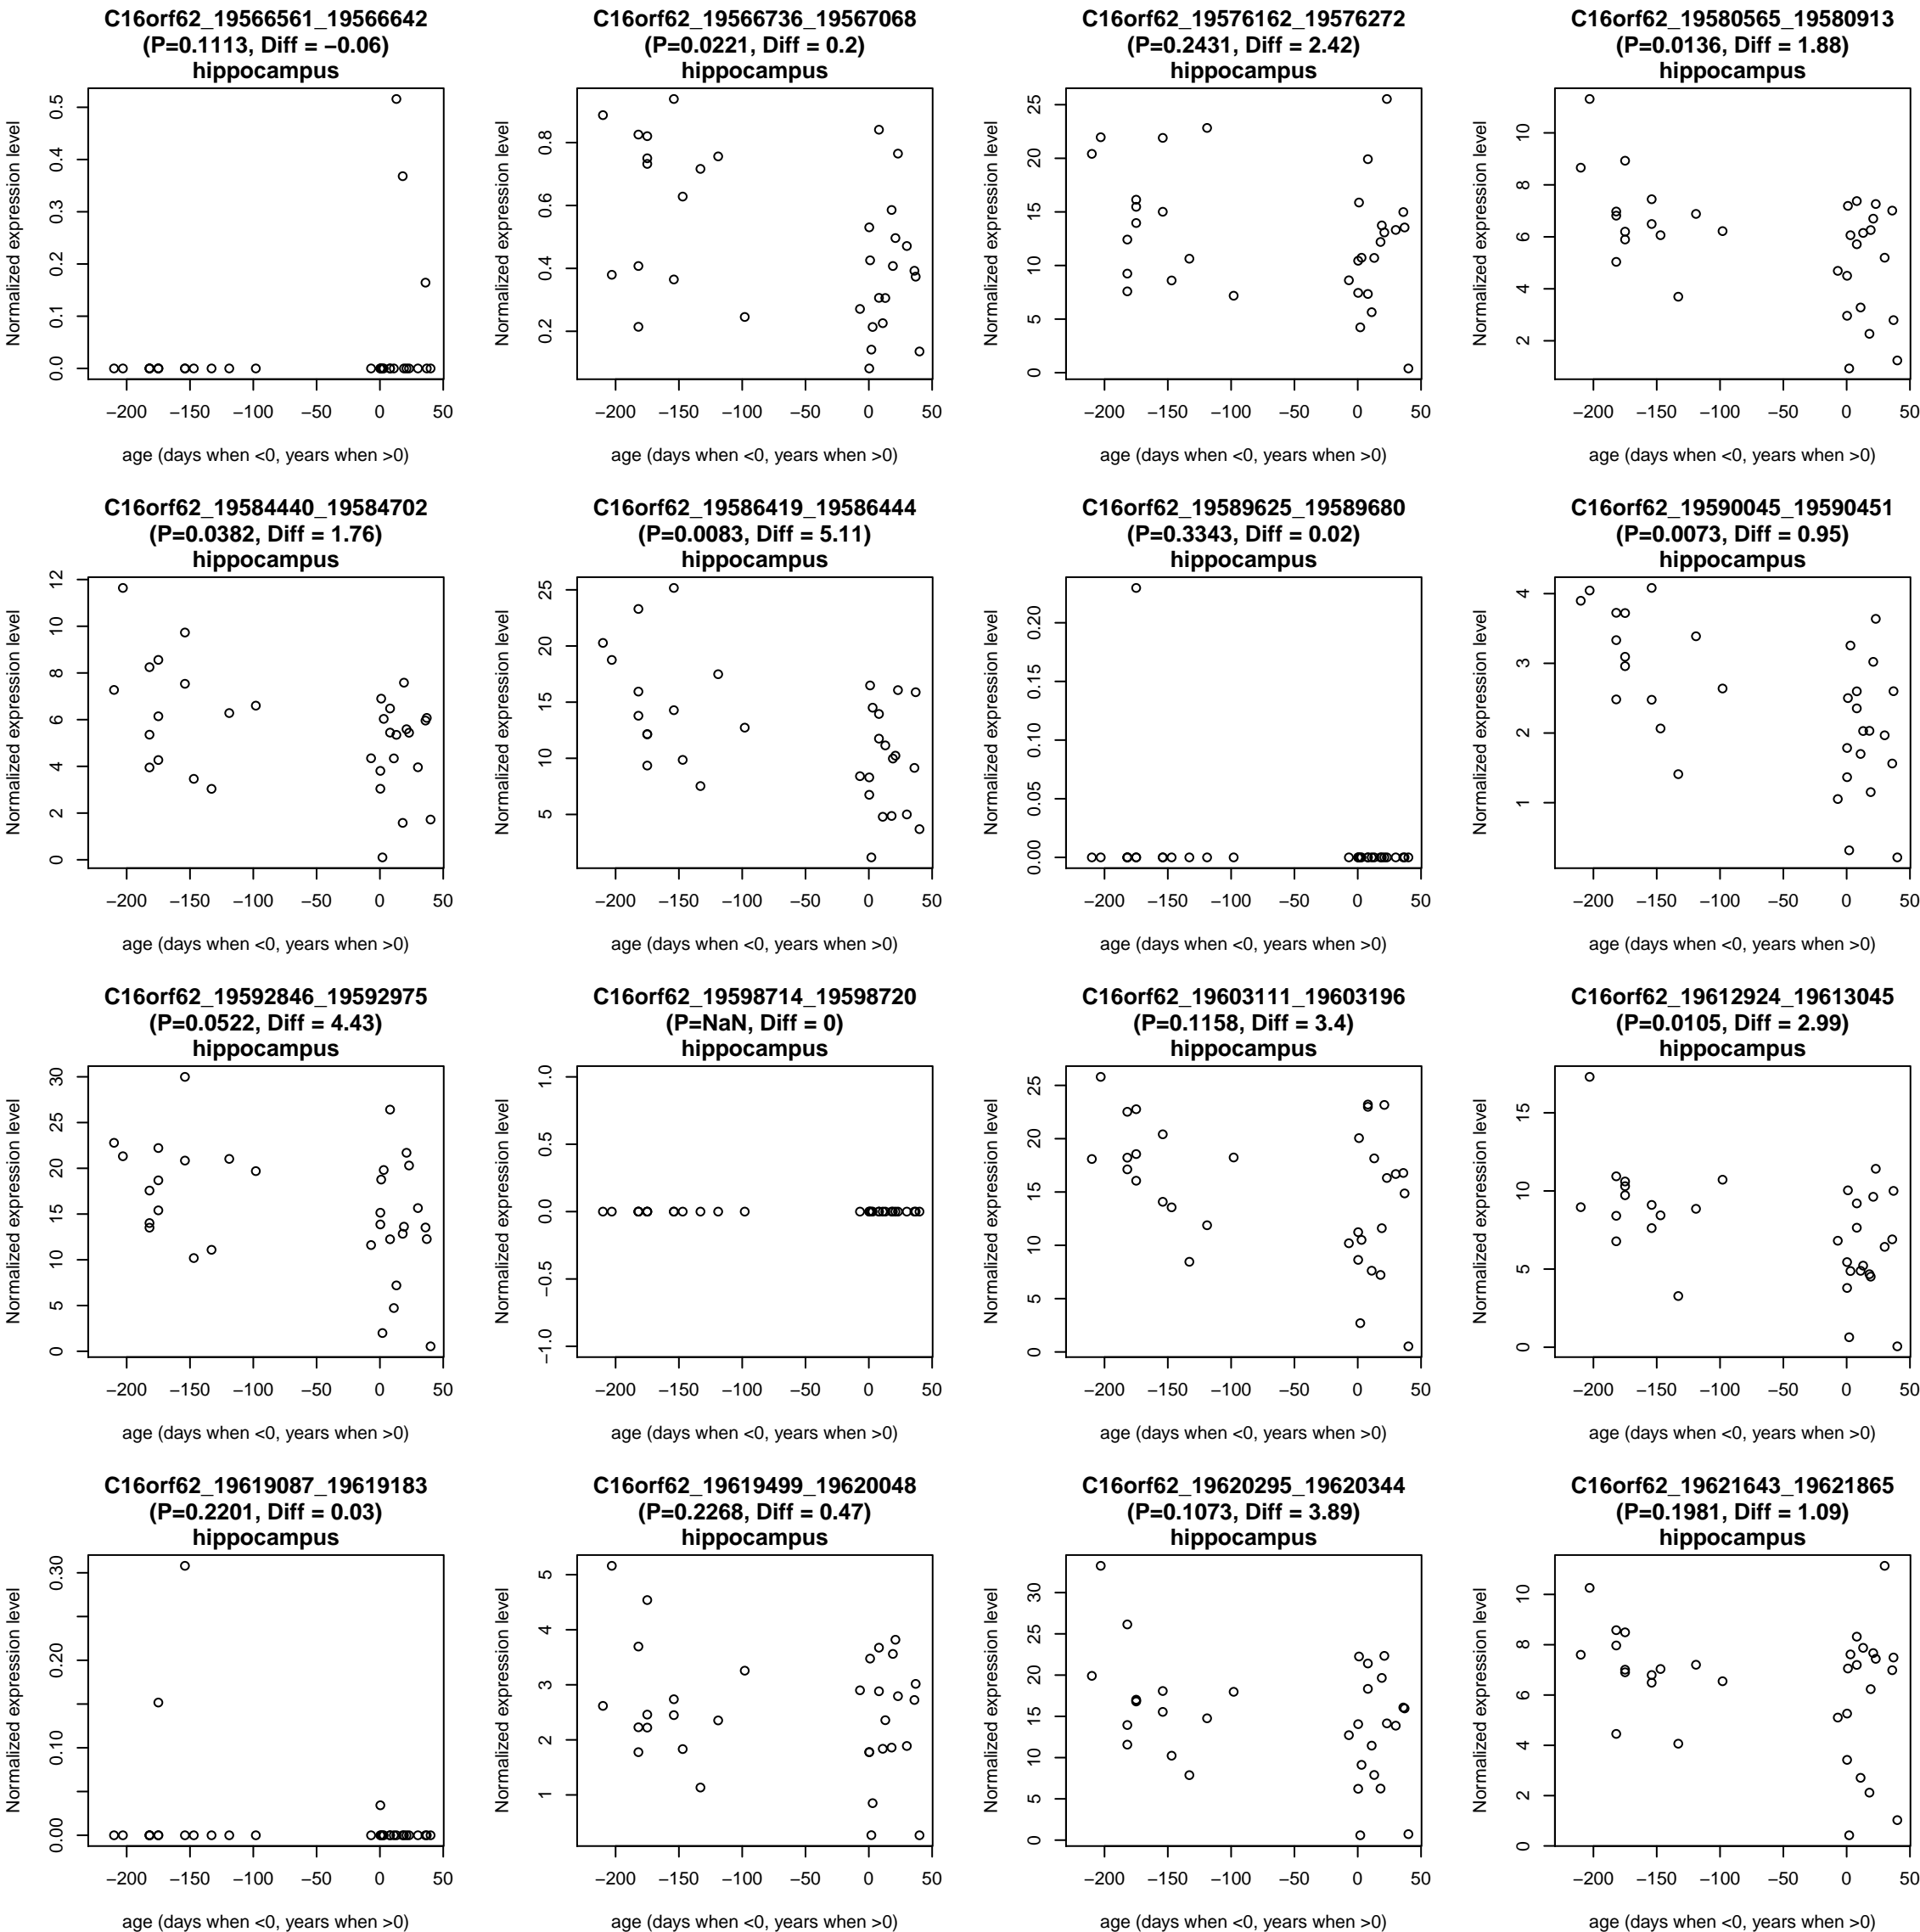

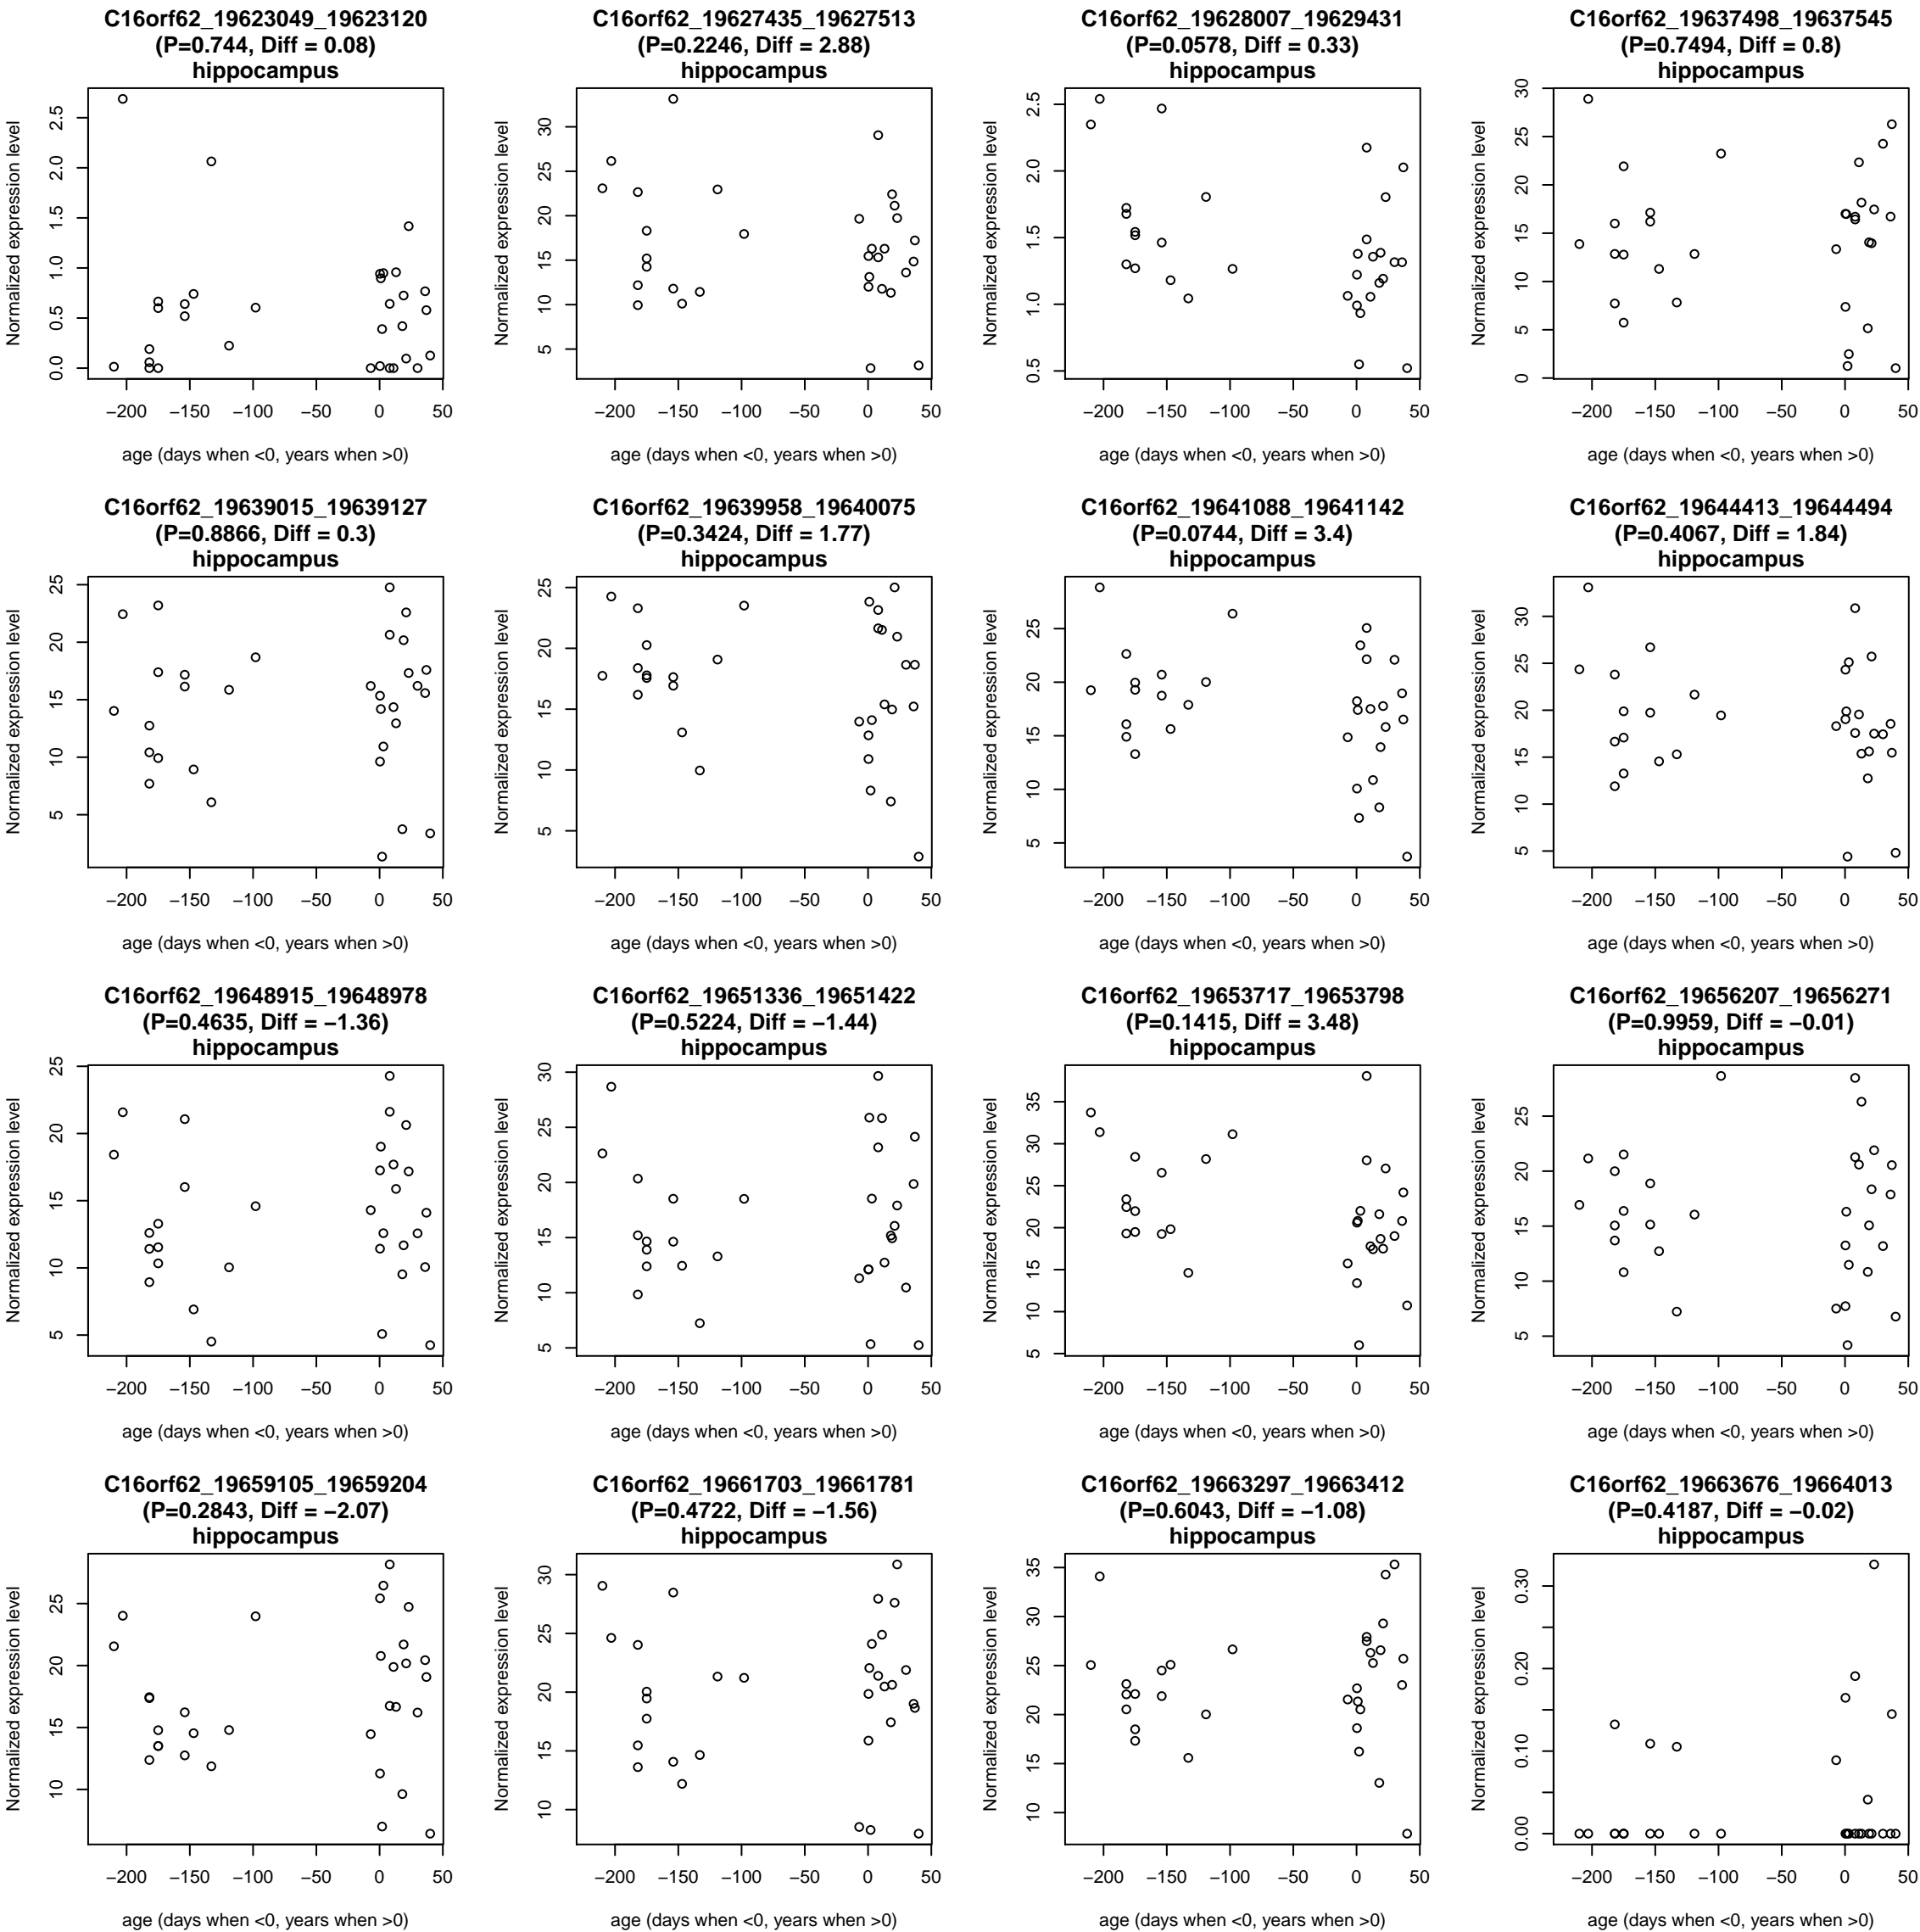

**C16orf62\_19680481\_19680621**  
(P=0.0908, Diff = -3.97)  
hippocampus

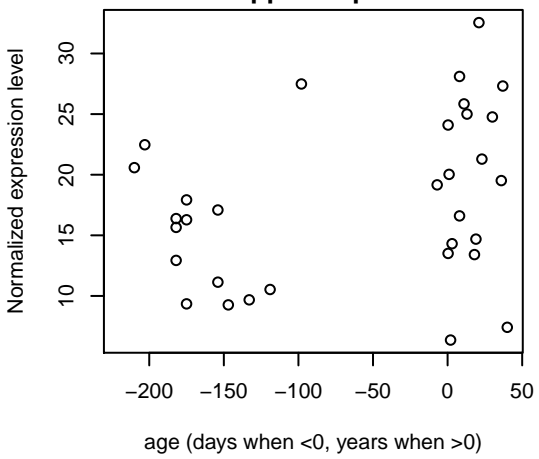

**C16orf62\_19693546\_19693712**  
(P=0.2084, Diff = -3.14)  
hippocampus

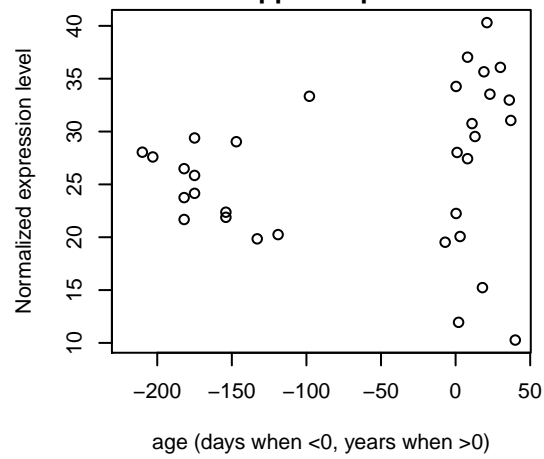

**C16orf62\_19702674\_19702793**  
(P=0.0925, Diff = -4.47)  
hippocampus

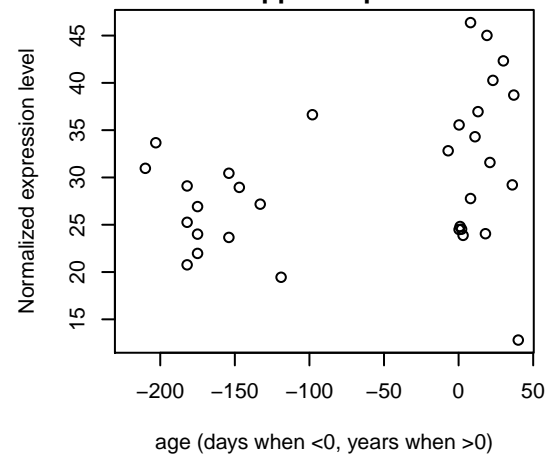

**C16orf62\_19710823\_19710970**  
(P=0.0626, Diff = -6.14)  
hippocampus

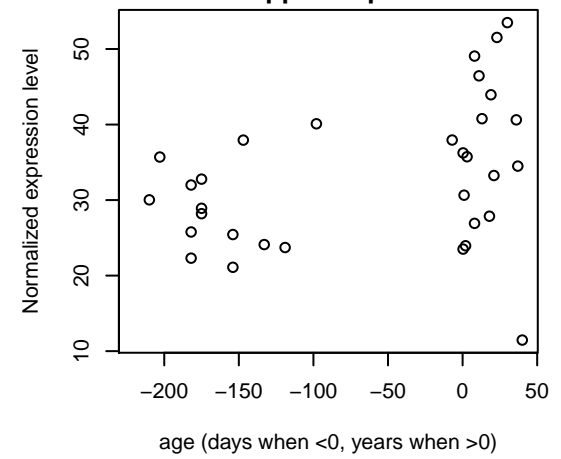

**C16orf62\_19711699\_19712448**  
(P=0.002, Diff = -2.77)  
hippocampus

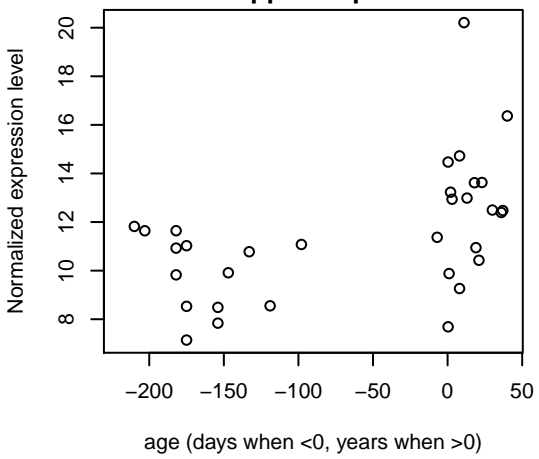

**C16orf62\_19716437\_19716880**  
(P=0.0064, Diff = 1.39)  
hippocampus

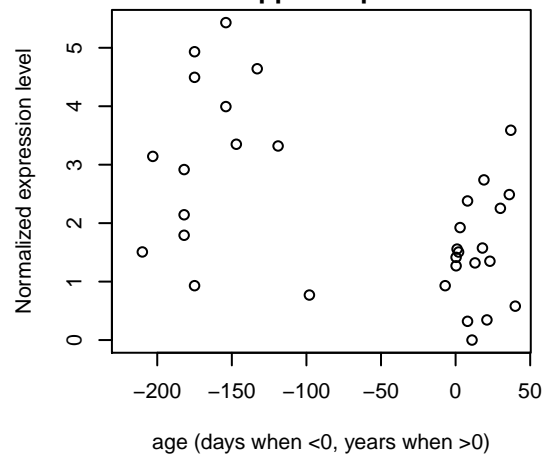

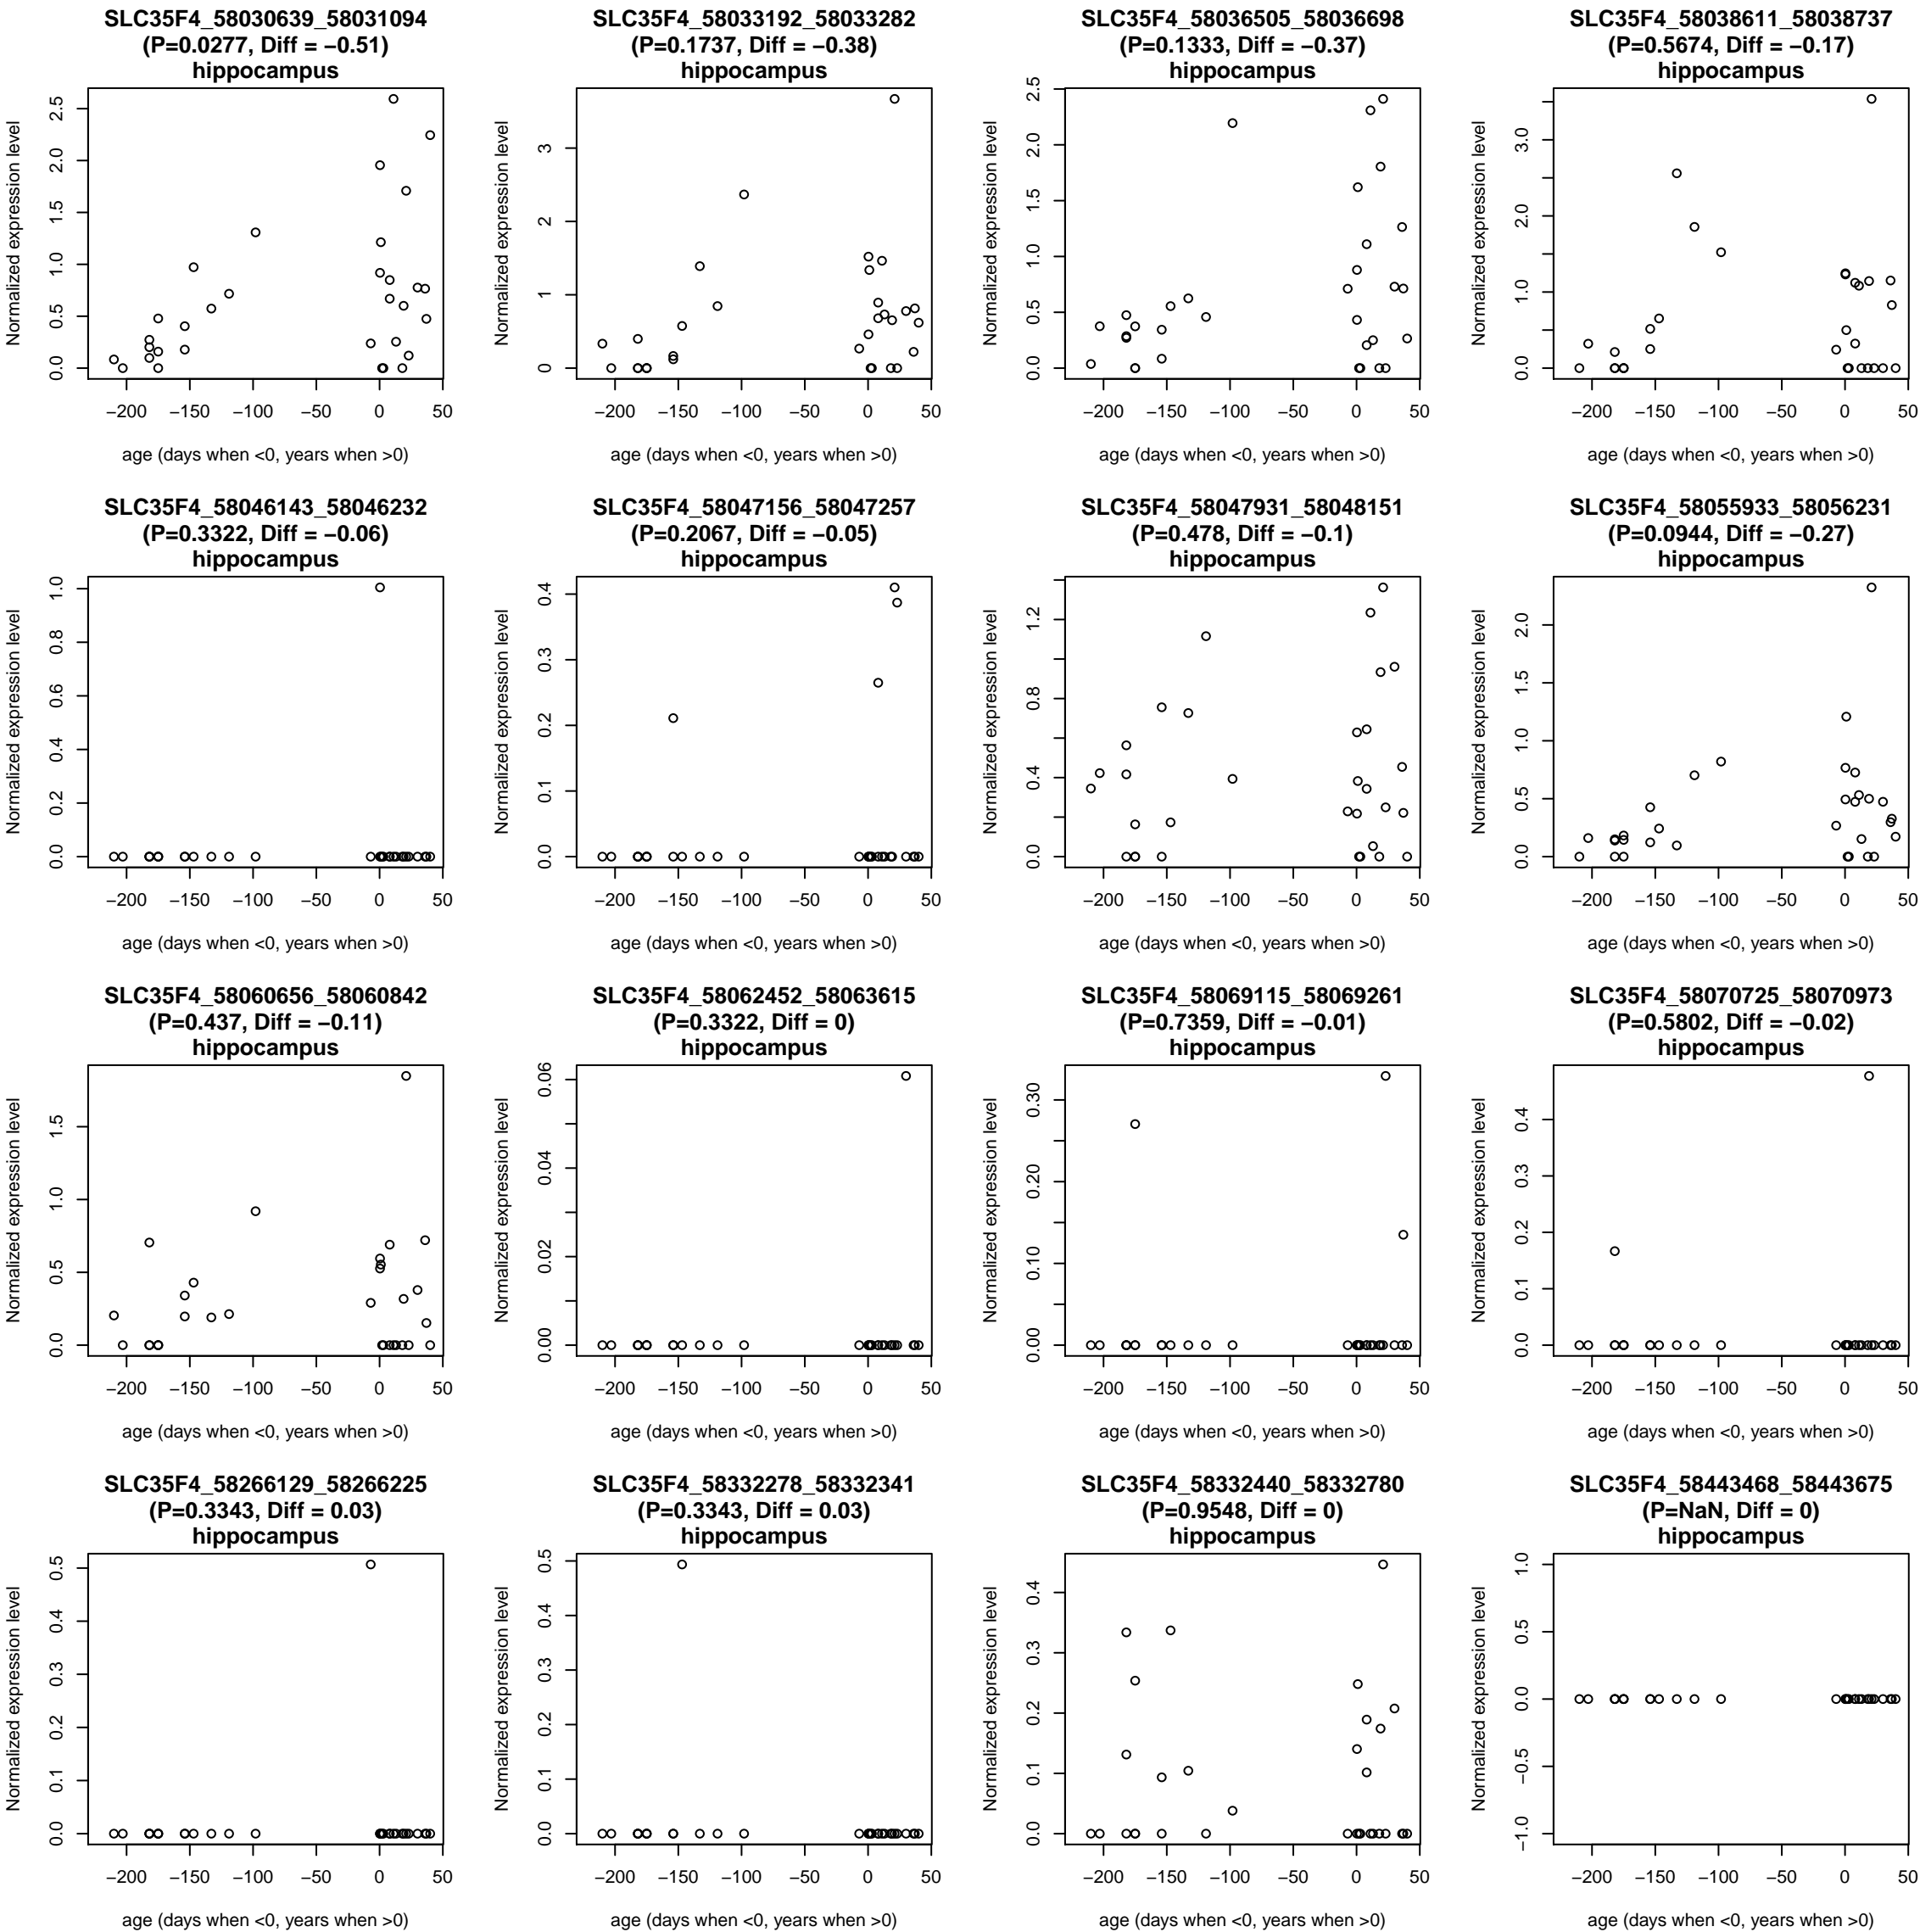

SLC35F4\_58448630\_58448912  
(P=0.2746, Diff = -0.05)  
hippocampus

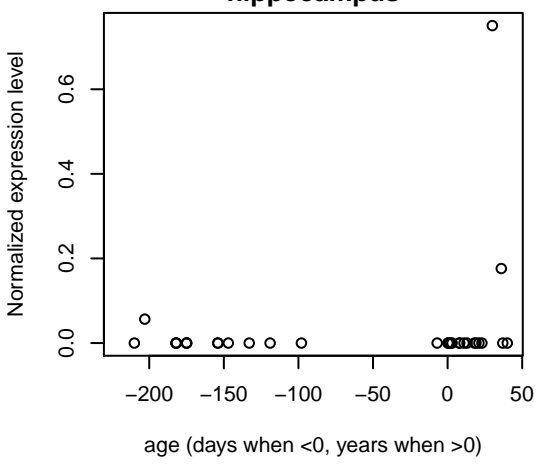



**CACNB2\_18429605\_18429785**  
(P=0.5023, Diff = -0.14)  
**hippocampus**

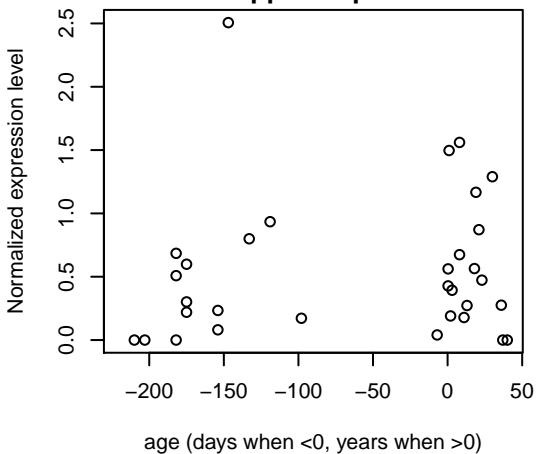

**CACNB2\_18429886\_18430144**  
(P=0.2138, Diff = -0.2)  
**hippocampus**

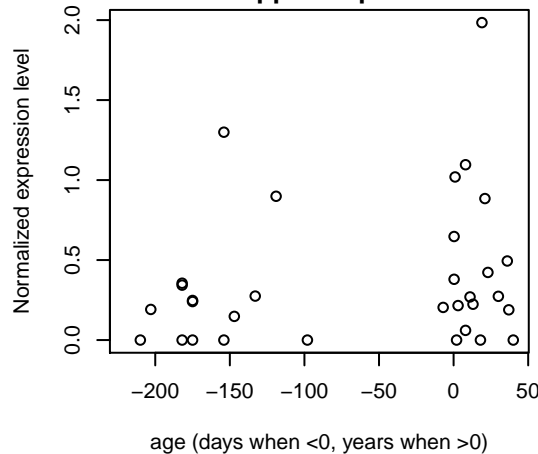

**CACNB2\_18439811\_18440198**  
(P=0.0665, Diff = -0.32)  
**hippocampus**

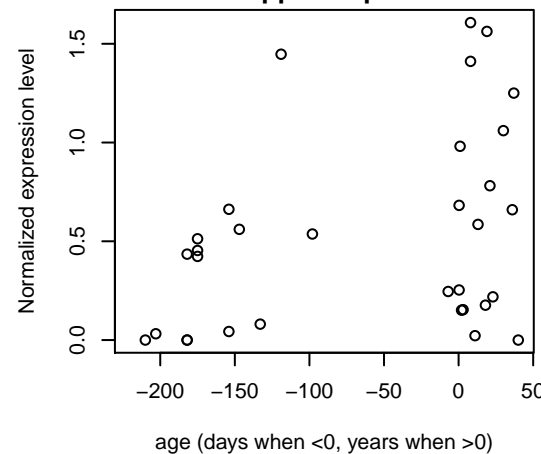

**CACNB2\_18470735\_18471036**  
(P=0.2771, Diff = -0.02)  
**hippocampus**

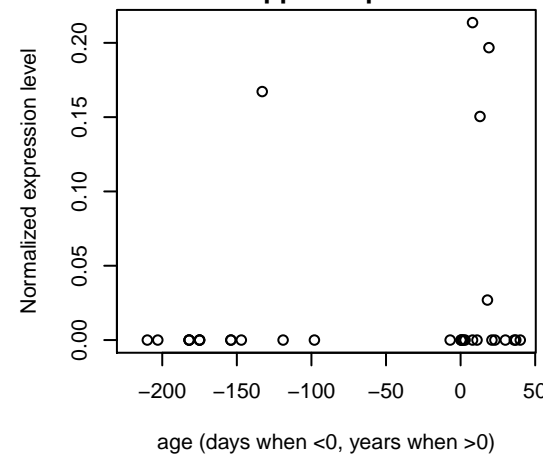

**CACNB2\_18549697\_18550246**  
(P=0.0035, Diff = -0.21)  
**hippocampus**

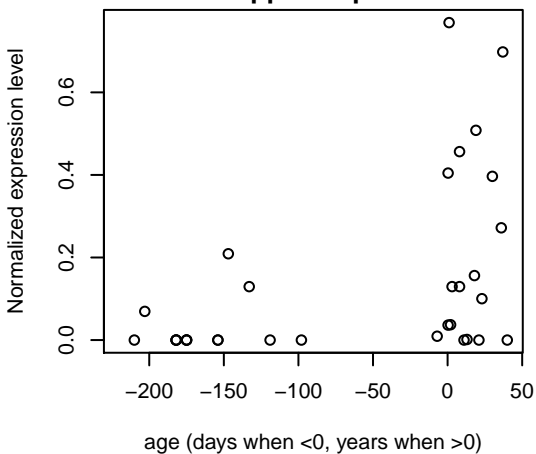

**CACNB2\_18629645\_18629906**  
(P=0.3268, Diff = -0.02)  
**hippocampus**

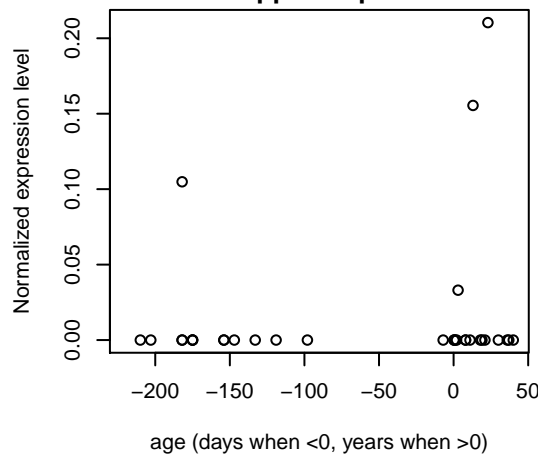

**CACNB2\_18689741\_18690029**  
(P=0.0105, Diff = -0.89)  
**hippocampus**

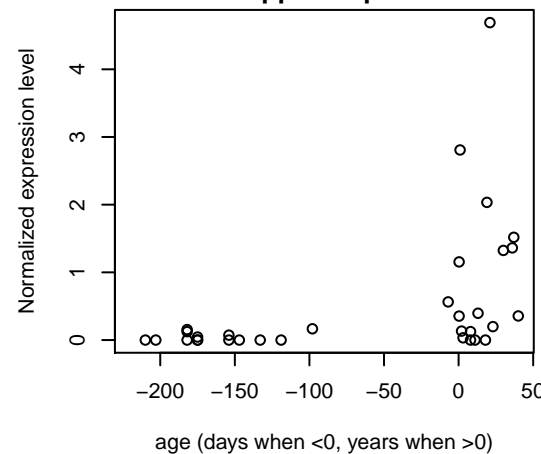

**CACNB2\_18690852\_18690972**  
(P=0.0069, Diff = -2.46)  
**hippocampus**

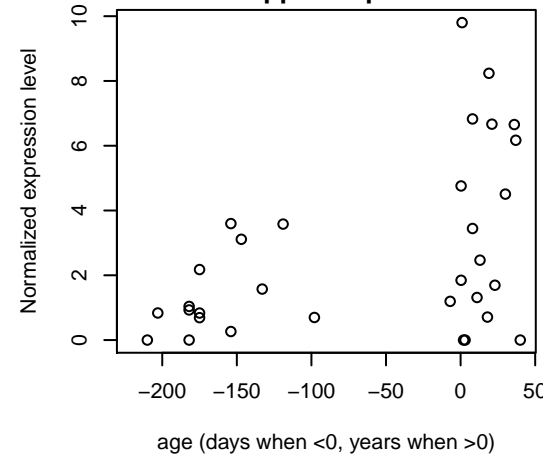

**CACNB2\_18787283\_18787722**  
(P=0.0146, Diff = -0.77)  
**hippocampus**

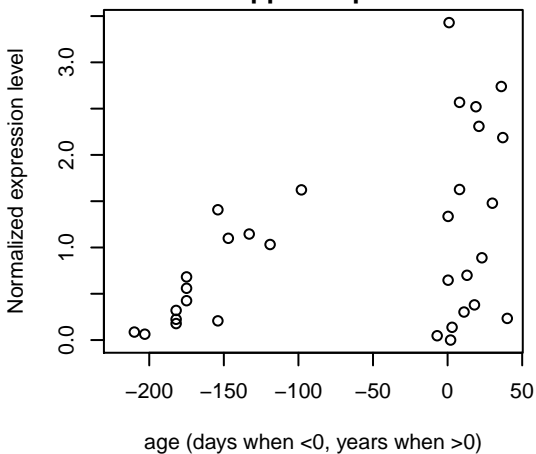

**CACNB2\_18789740\_18789877**  
(P=0.0113, Diff = -2.85)  
**hippocampus**

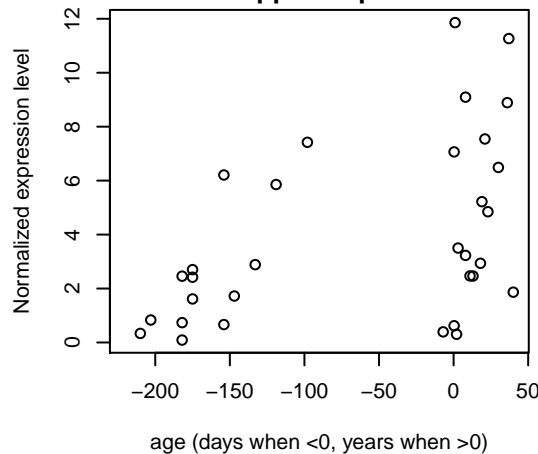

**CACNB2\_18795399\_18795476**  
(P=0.0078, Diff = -3.72)  
**hippocampus**

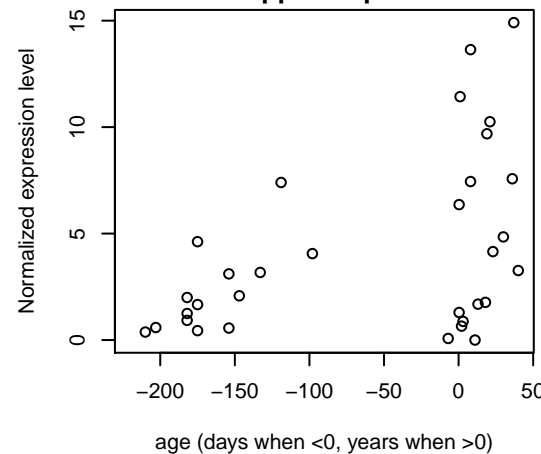

**CACNB2\_18803164\_18803298**  
(P=0.0021, Diff = -3.69)  
**hippocampus**

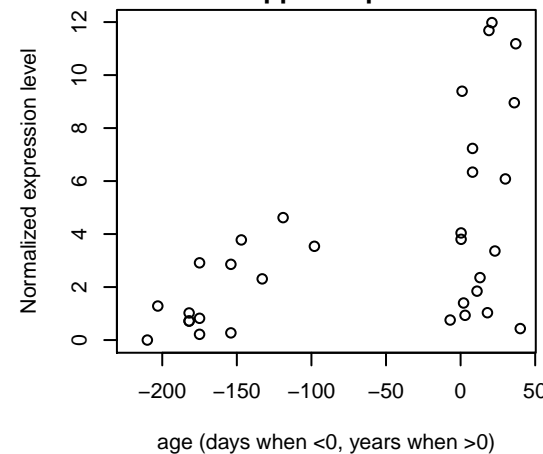

**CACNB2\_18803439\_18803459**  
(P=0.5128, Diff = -0.14)  
**hippocampus**

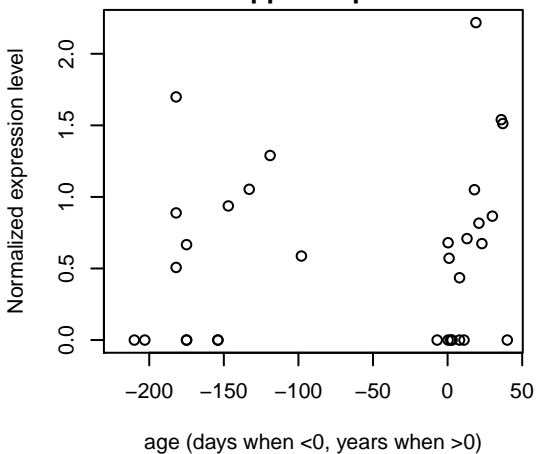

**CACNB2\_18803908\_18803970**  
(P=0.3343, Diff = 0.05)  
**hippocampus**

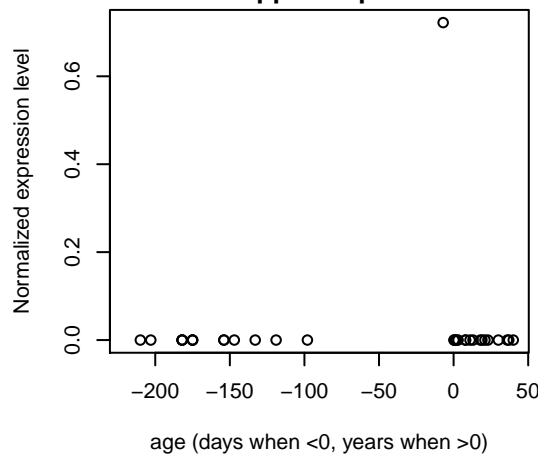

**CACNB2\_18807264\_18807345**  
(P=0.0242, Diff = -2.82)  
**hippocampus**

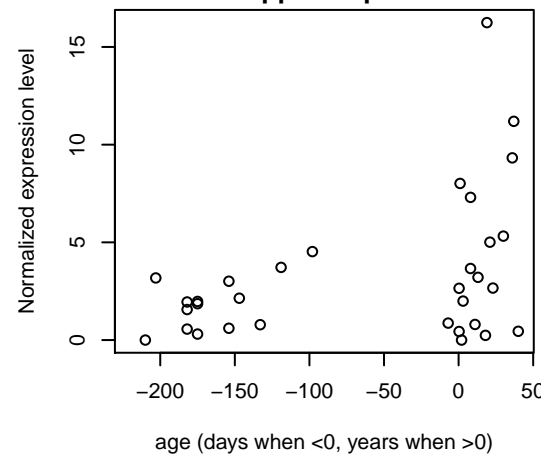

**CACNB2\_18807838\_18807897**  
(P=0.011, Diff = -2.82)  
**hippocampus**

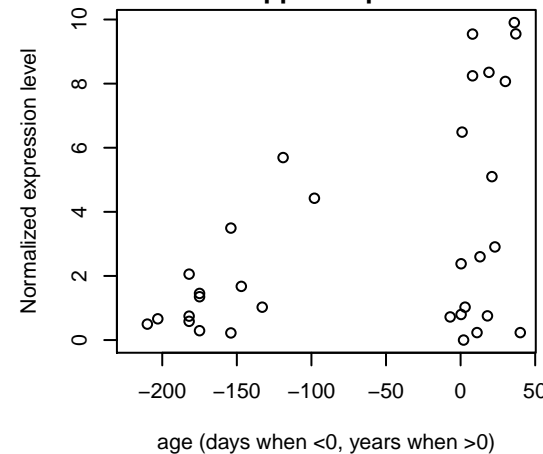

**CACNB2\_18816516\_18816626**  
(P=0.0082, Diff = -3.63)  
hippocampus

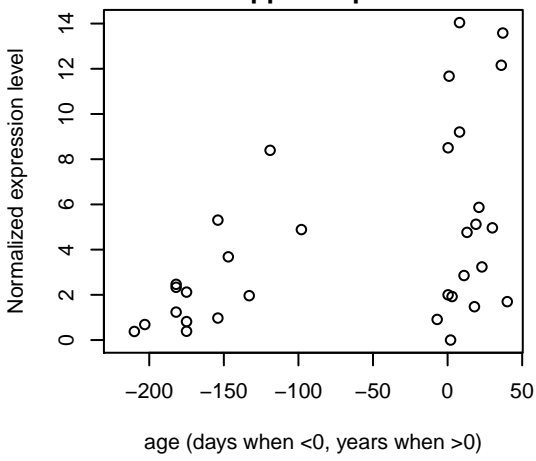

**CACNB2\_18823004\_18823156**  
(P=0.0019, Diff = -4.24)  
hippocampus

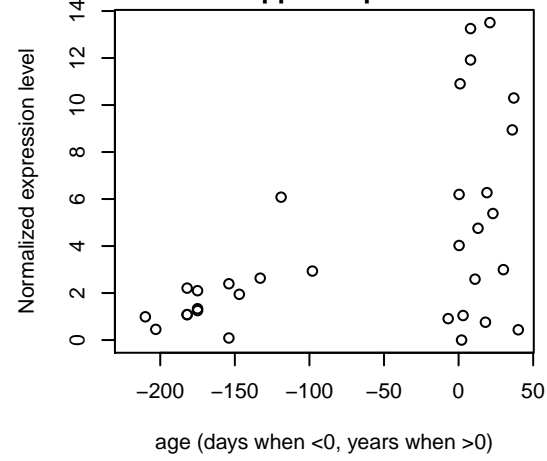

**CACNB2\_18825029\_18825125**  
(P=0.001, Diff = -5.1)  
hippocampus

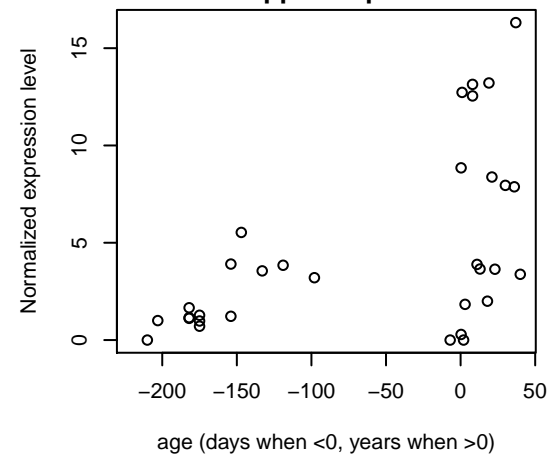

**CACNB2\_18827108\_18827294**  
(P=0.0038, Diff = -5.53)  
hippocampus

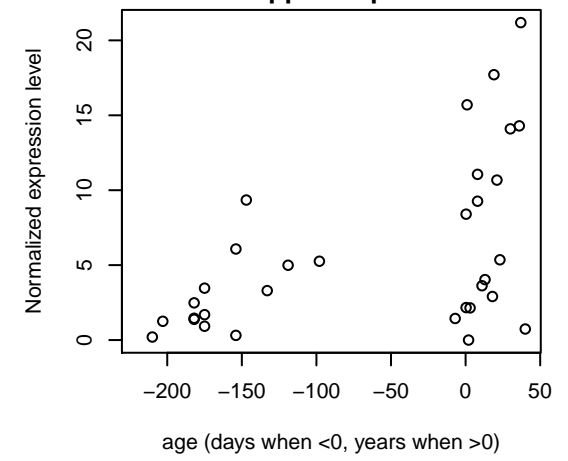

**CACNB2\_18828158\_18830798**  
(P=0, Diff = -5.61)  
hippocampus

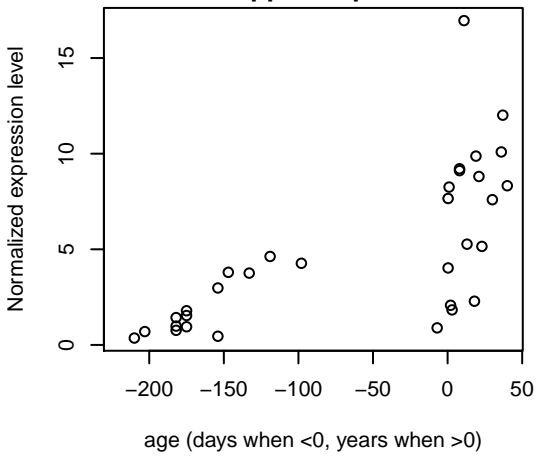

**CTH\_70876900\_70877266**  
(P=0.0019, Diff = 1.41)  
hippocampus

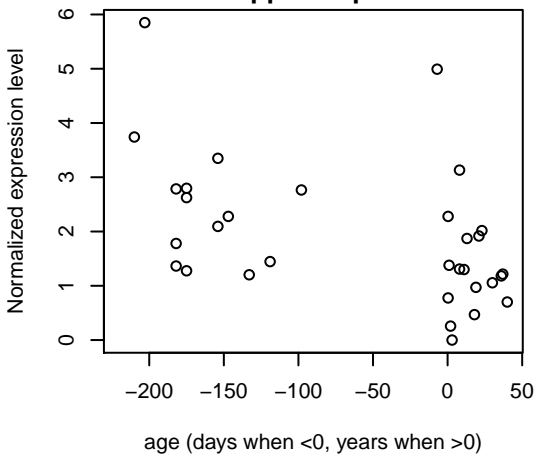

**CTH\_70881638\_70881720**  
(P=0.0222, Diff = 1.38)  
hippocampus

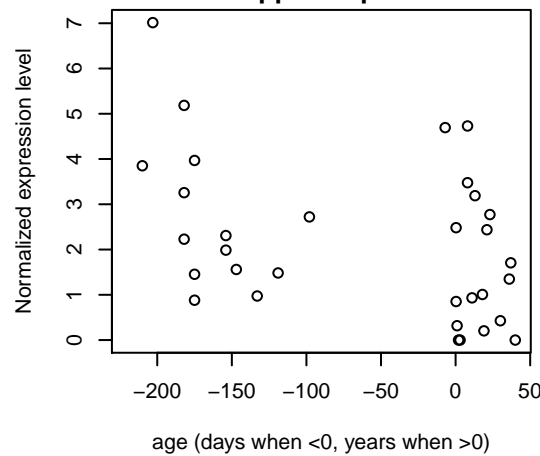

**CTH\_70883619\_70883715**  
(P=9e-04, Diff = 1.17)  
hippocampus

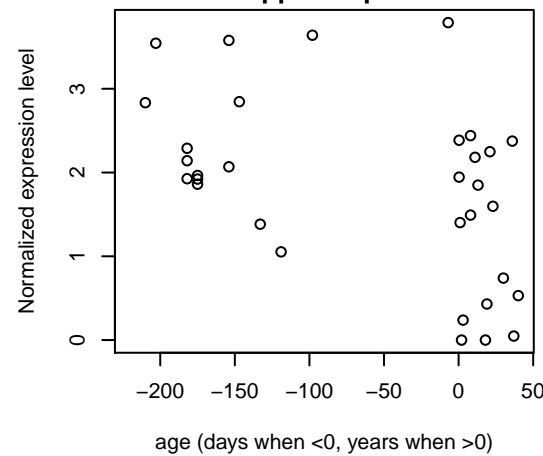

**CTH\_70887248\_70887358**  
(P=0.0165, Diff = 1.44)  
hippocampus

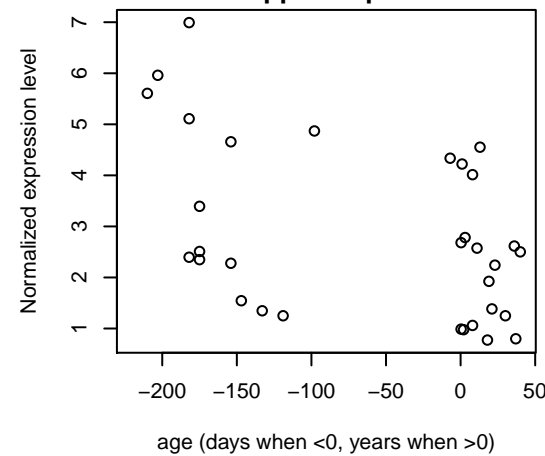

**CTH\_70889967\_70890099**  
(P=0.258, Diff = 0.82)  
hippocampus

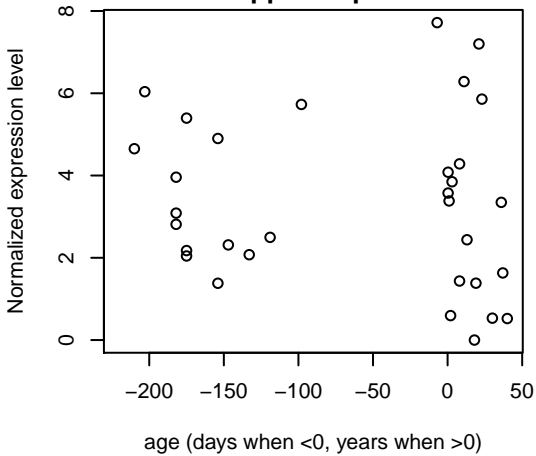

**CTH\_70895476\_70895534**  
(P=0.0134, Diff = 1.45)  
hippocampus

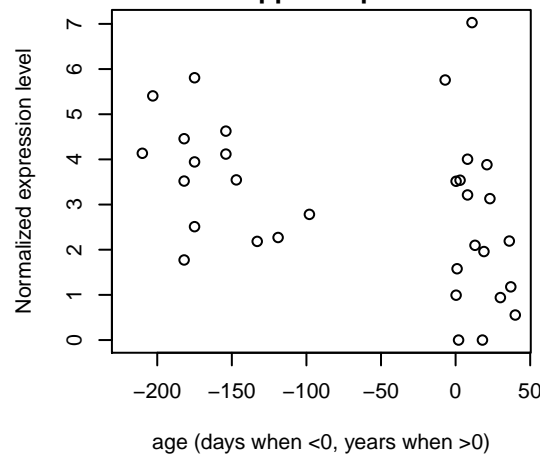

**CTH\_70895999\_70896077**  
(P=0.0487, Diff = 1.34)  
hippocampus

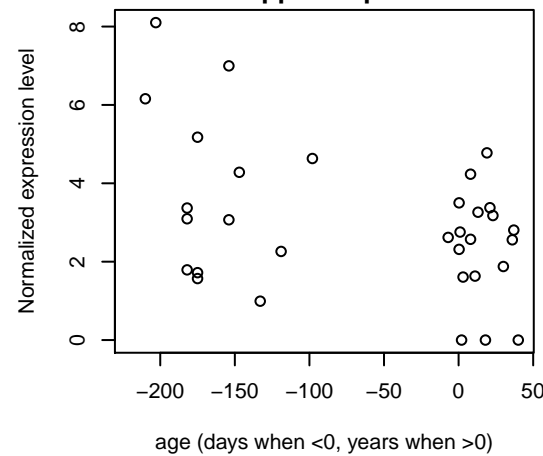

**CTH\_70897765\_70897918**  
(P=0.0062, Diff = 1.21)  
hippocampus

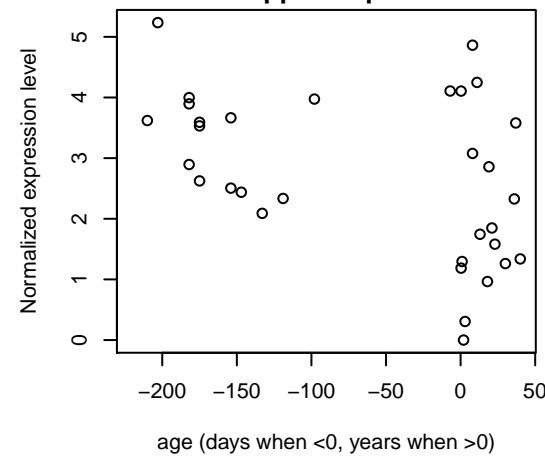

**CTH\_70899510\_70899632**  
(P=0.0716, Diff = 1.2)  
hippocampus

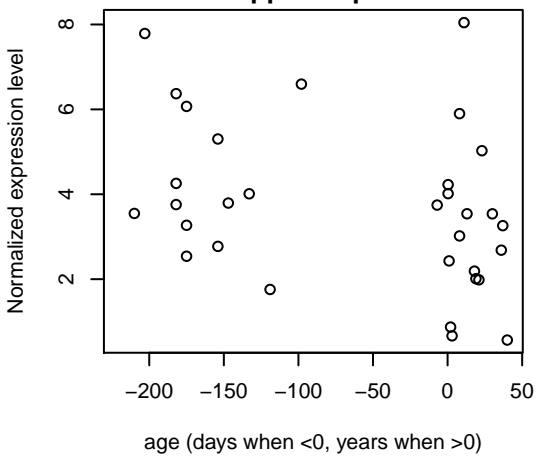

**CTH\_70900533\_70900860**  
(P=0.7631, Diff = 0.04)  
hippocampus

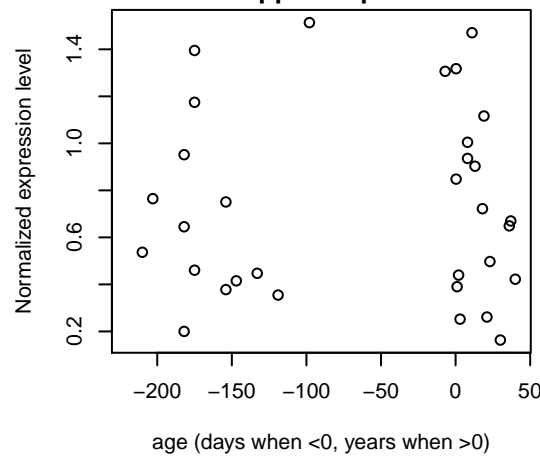

**CTH\_70904370\_70904509**  
(P=0.9845, Diff = 0.02)  
hippocampus

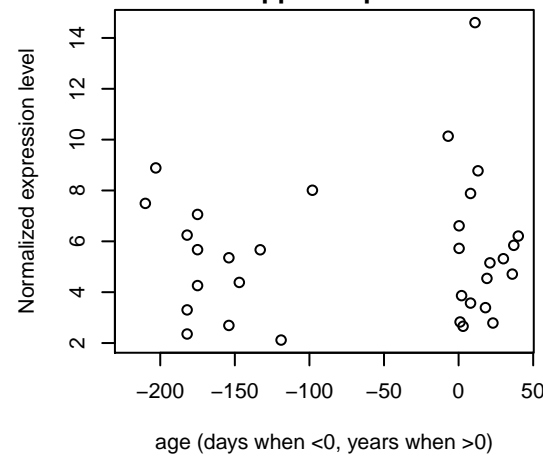

**CTH\_70904783\_70905534**  
(P=0.6234, Diff = -0.14)  
hippocampus

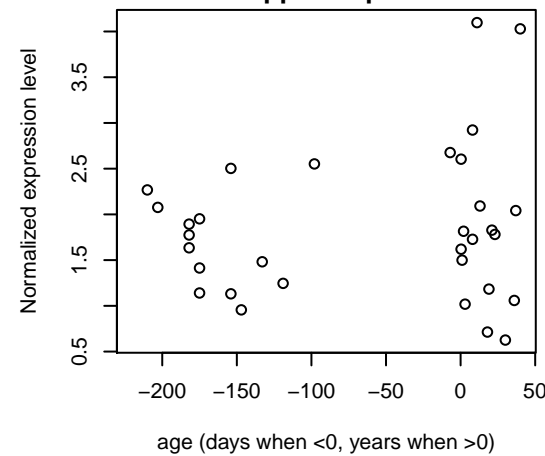

**SEC14L5\_5008317\_5008446**  
( $P=0.0033$ , Diff =  $-1.51$ )  
hippocampus

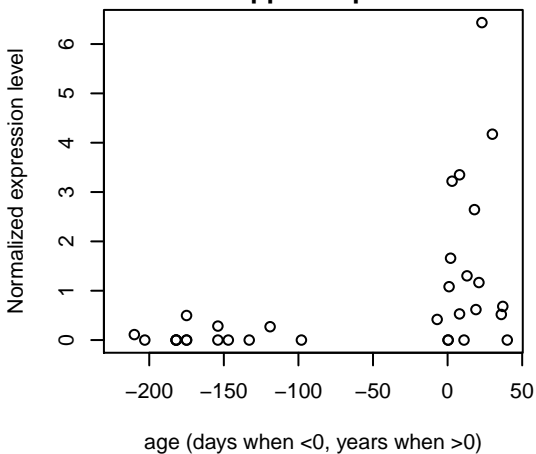

**SEC14L5\_5009273\_5009387**  
( $P=8e-04$ , Diff =  $-4.18$ )  
hippocampus

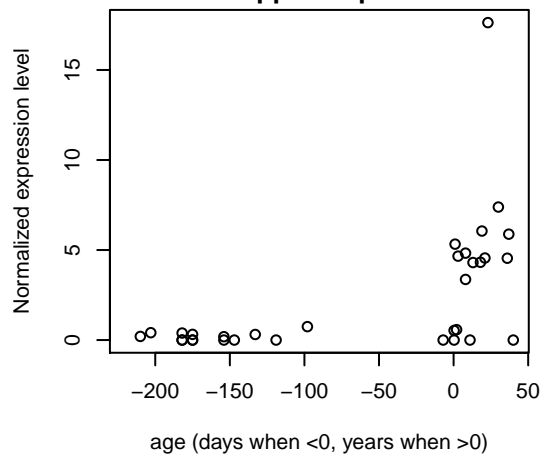

**SEC14L5\_5037557\_5037707**  
( $P=4e-04$ , Diff =  $-2.35$ )  
hippocampus

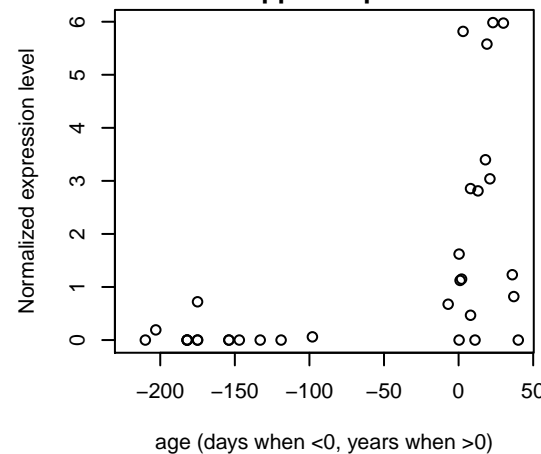

**SEC14L5\_5038149\_5038281**  
( $P=0.0019$ , Diff =  $-5.46$ )  
hippocampus

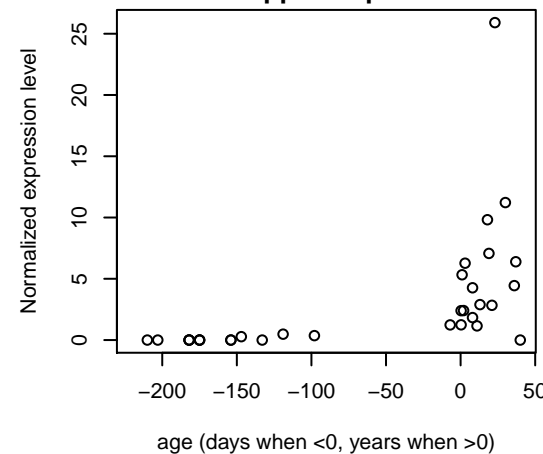

**SEC14L5\_5040767\_5040896**  
( $P=7e-04$ , Diff =  $-5.97$ )  
hippocampus

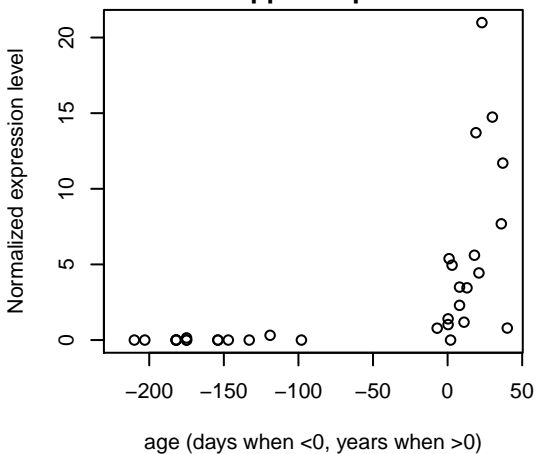

**SEC14L5\_5041838\_5042031**  
( $P=6e-04$ , Diff =  $-5.18$ )  
hippocampus

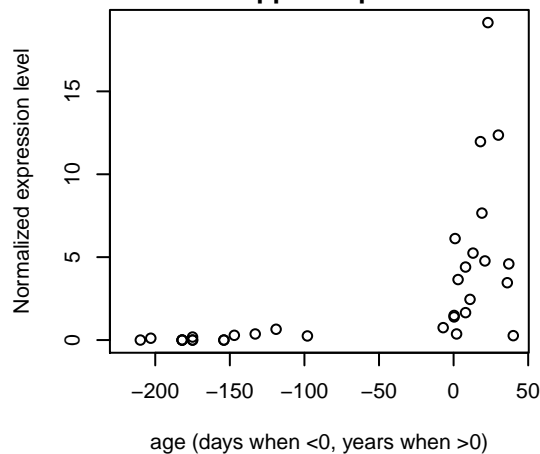

**SEC14L5\_5046348\_5046461**  
( $P=0.0016$ , Diff =  $-4.86$ )  
hippocampus

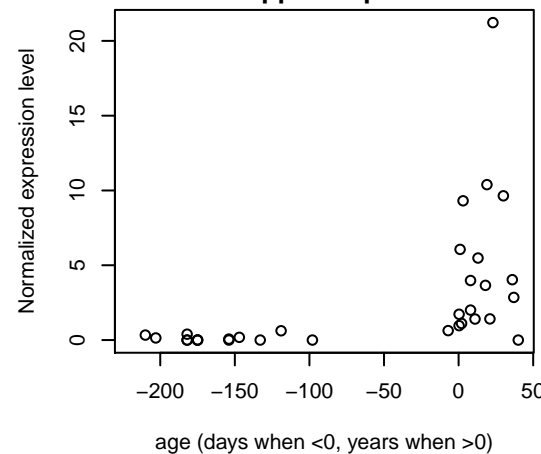

**SEC14L5\_5046855\_5047045**  
( $P=0$ , Diff =  $-6.6$ )  
hippocampus

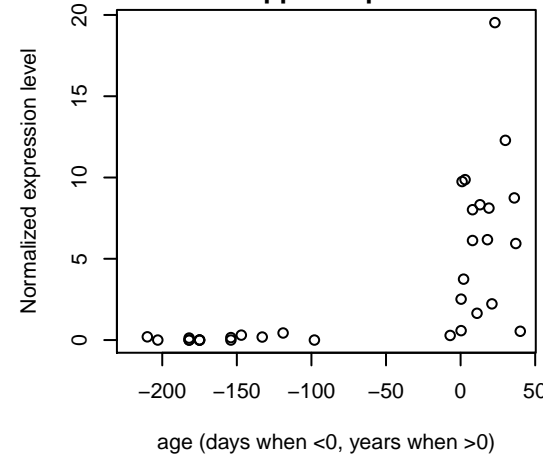

**SEC14L5\_5050655\_5050744**  
( $P=1e-04$ , Diff =  $-4.55$ )  
hippocampus

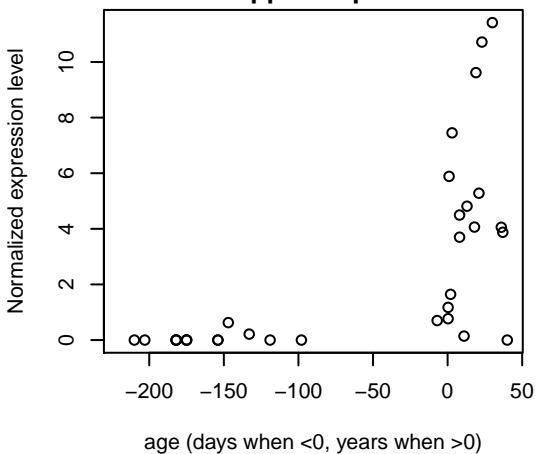

**SEC14L5\_5050855\_5050926**  
( $P=5e-04$ , Diff =  $-5.33$ )  
hippocampus

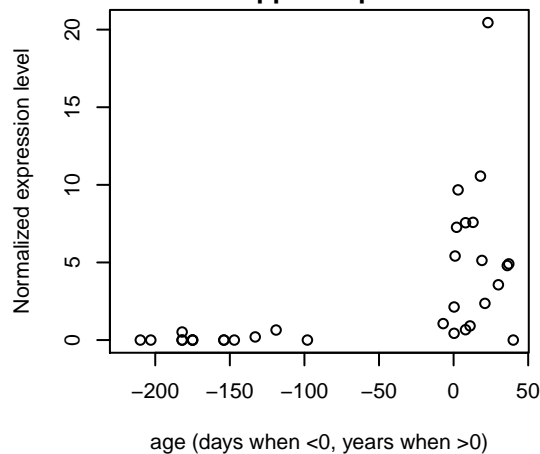

**SEC14L5\_5053402\_5053574**  
( $P=1e-04$ , Diff =  $-4.86$ )  
hippocampus

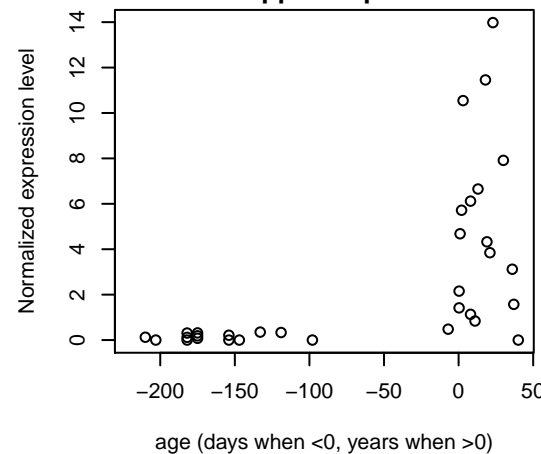

**SEC14L5\_5055914\_5056049**  
( $P=1e-04$ , Diff =  $-6.17$ )  
hippocampus

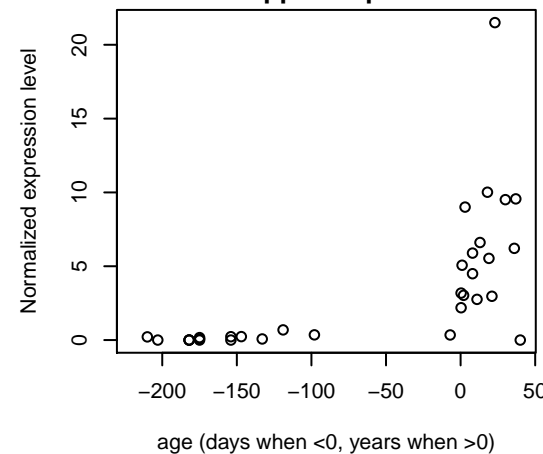

**SEC14L5\_5057352\_5057487**  
( $P=2e-04$ , Diff =  $-5.87$ )  
hippocampus

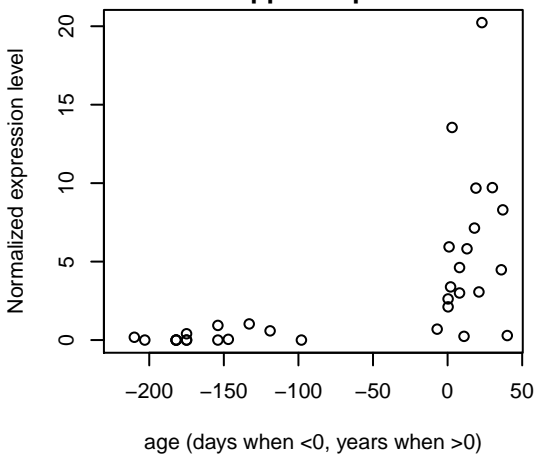

**SEC14L5\_5058421\_5058649**  
( $P=2e-04$ , Diff =  $-4$ )  
hippocampus

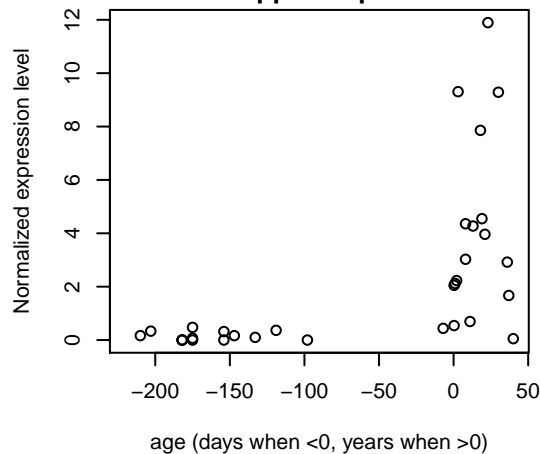

**SEC14L5\_5061095\_5061274**  
( $P=1e-04$ , Diff =  $-5.5$ )  
hippocampus

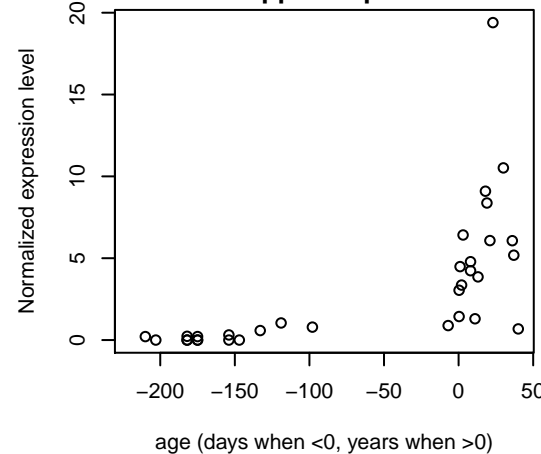

**SEC14L5\_5064859\_5069156**  
( $P=0$ , Diff =  $-10.48$ )  
hippocampus

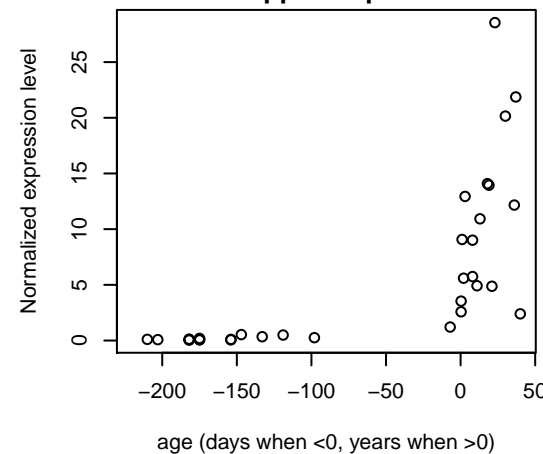

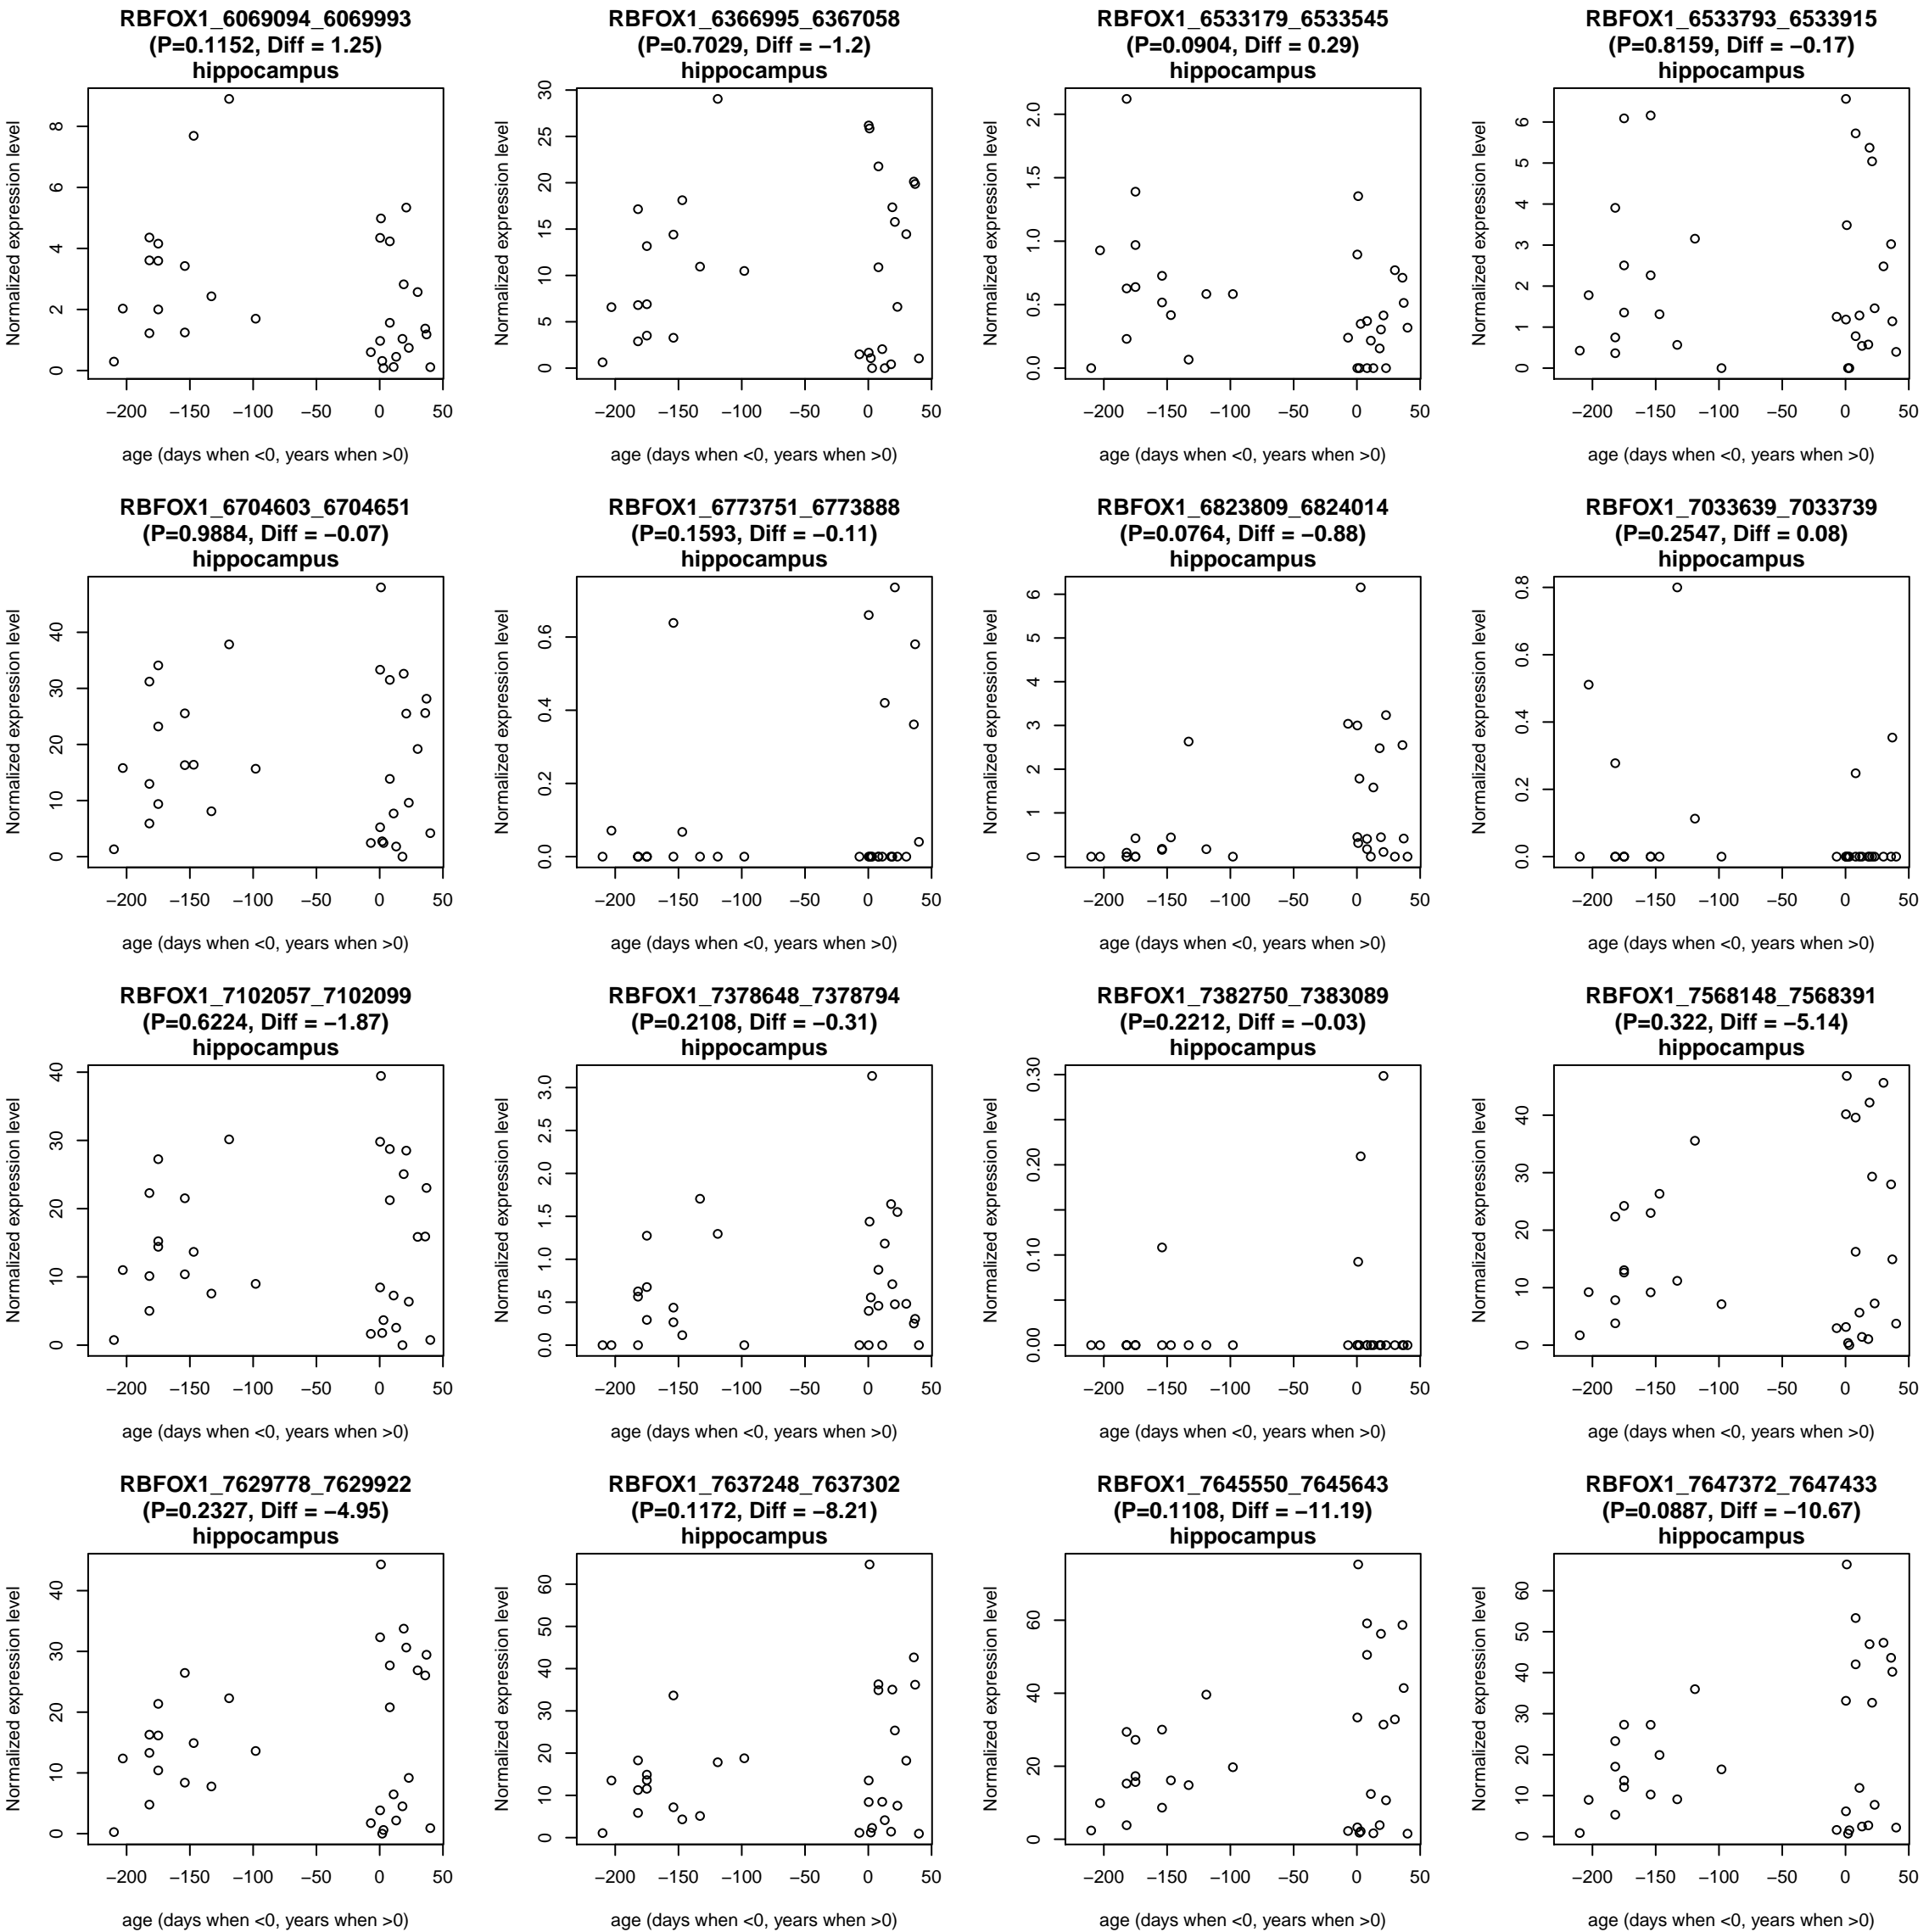

**RBFOX1\_7657286\_7657340**  
(P=0.0519, Diff = -14.47)  
hippocampus

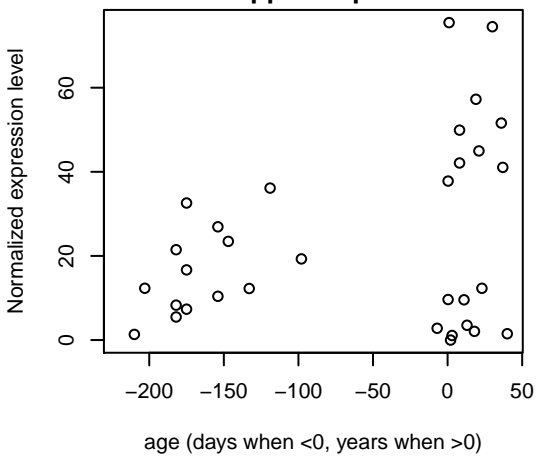

**RBFOX1\_7680604\_7680685**  
(P=0.0721, Diff = -13.48)  
hippocampus

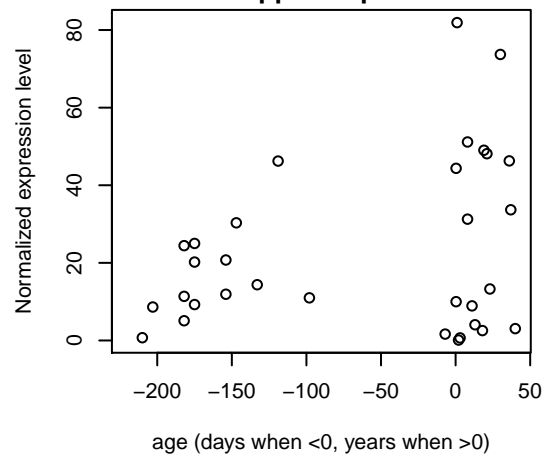

**RBFOX1\_7703816\_7703949**  
(P=0.3719, Diff = -3.09)  
hippocampus

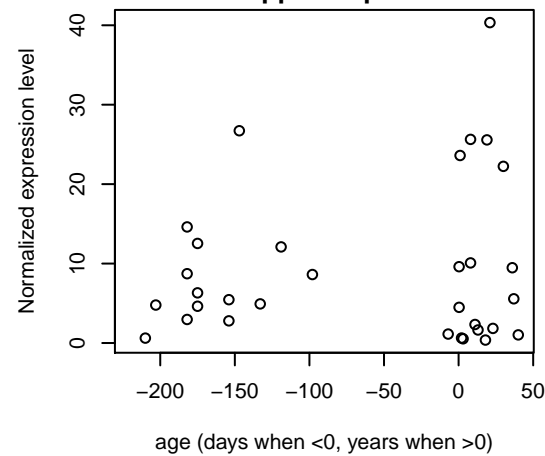

**RBFOX1\_7714930\_7714970**  
(P=0.2763, Diff = -4)  
hippocampus

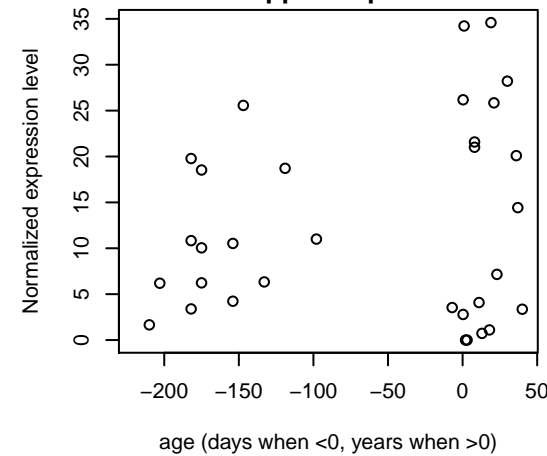

**RBFOX1\_7721558\_7721601**  
(P=0.0324, Diff = -0.43)  
hippocampus

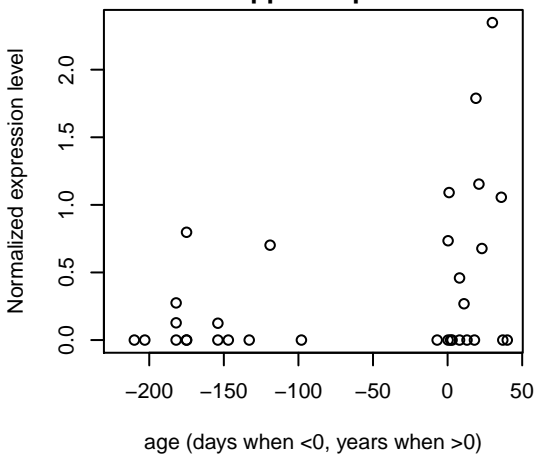

**RBFOX1\_7726775\_7726840**  
(P=0.1587, Diff = -9.84)  
hippocampus

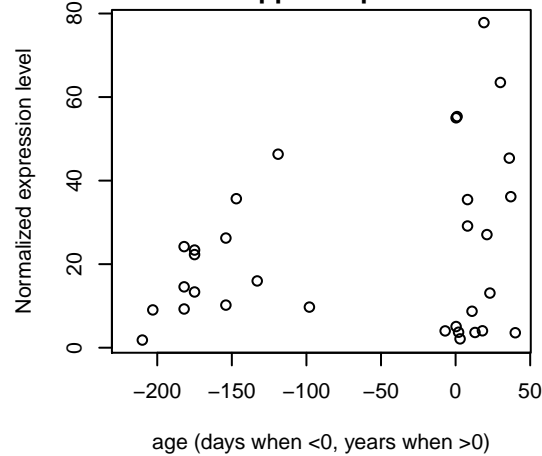

**RBFOX1\_7743316\_7743369**  
(P=0.0234, Diff = -9.06)  
hippocampus

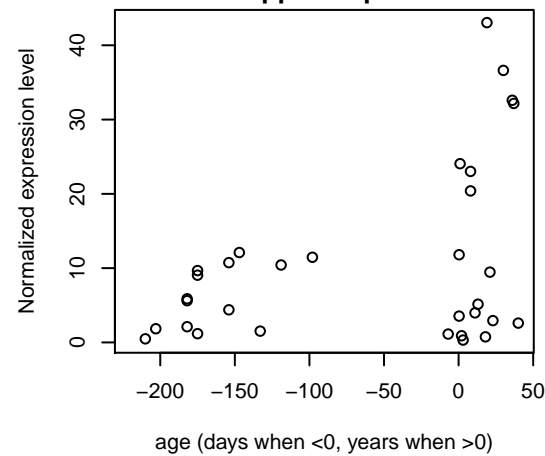

**RBFOX1\_7759057\_7759133**  
(P=0.0698, Diff = -14.3)  
hippocampus

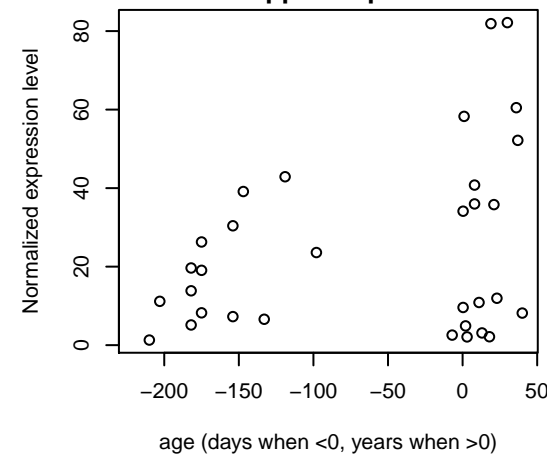

**RBFOX1\_7759495\_7763340**  
(P=7e-04, Diff = -16.74)  
hippocampus

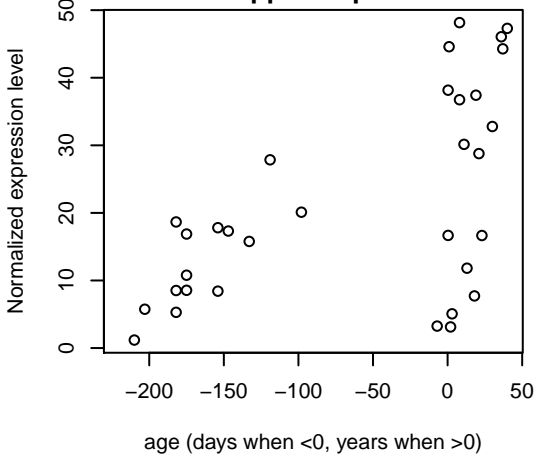

**TBX4\_59529778\_59529938**  
(P=NaN, Diff = 0)  
hippocampus

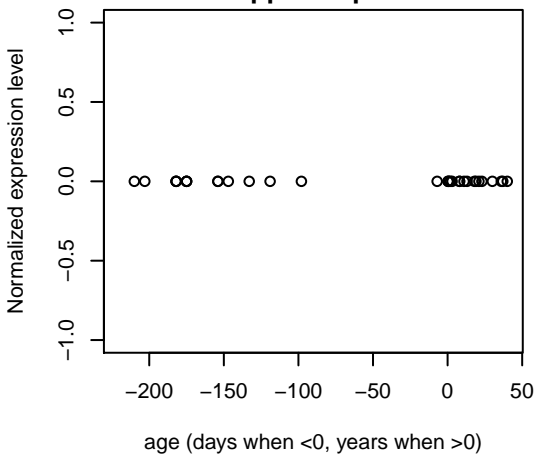

**TBX4\_59533806\_59534037**  
(P=0.3343, Diff = 0)  
hippocampus

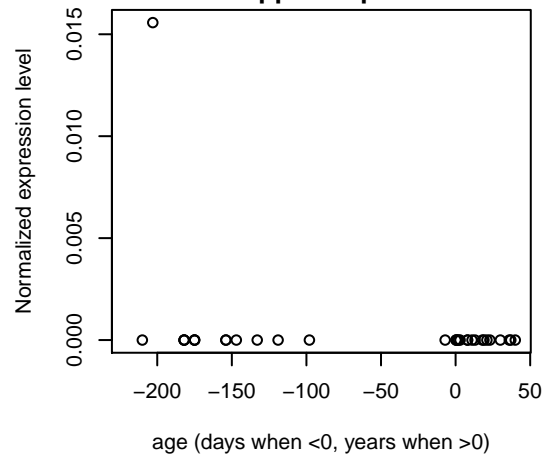

**TBX4\_59534897\_59534992**  
(P=0.3343, Diff = 0.01)  
hippocampus

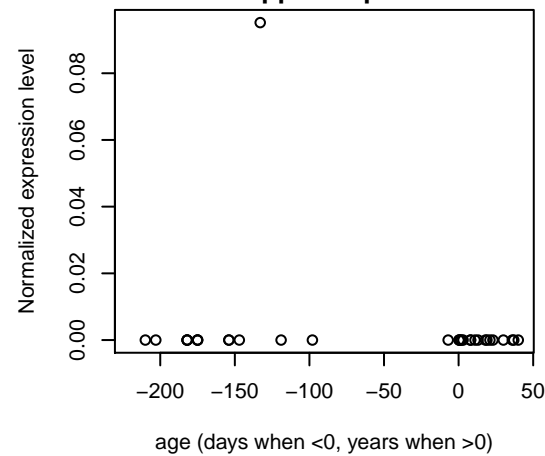

**TBX4\_59543179\_59543299**  
(P=0.1663, Diff = 0.03)  
hippocampus

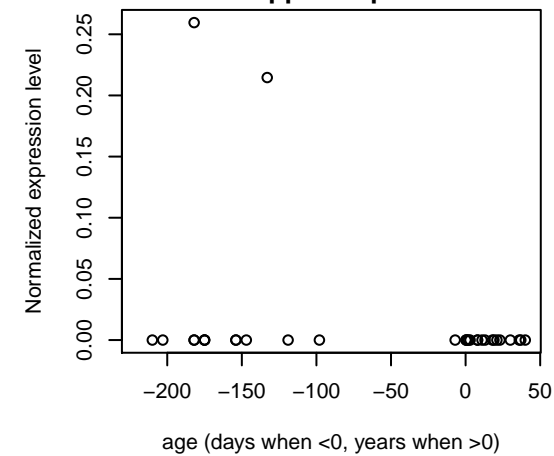

**TBX4\_59544870\_59545018**  
(P=0.3343, Diff = 0.02)  
hippocampus

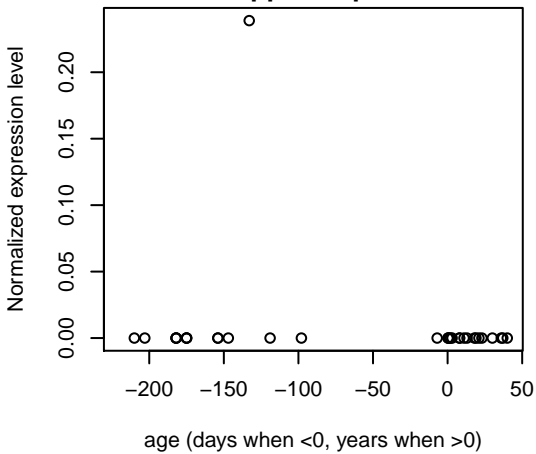

**TBX4\_59555987\_59556140**  
(P=0.3322, Diff = -0.01)  
hippocampus

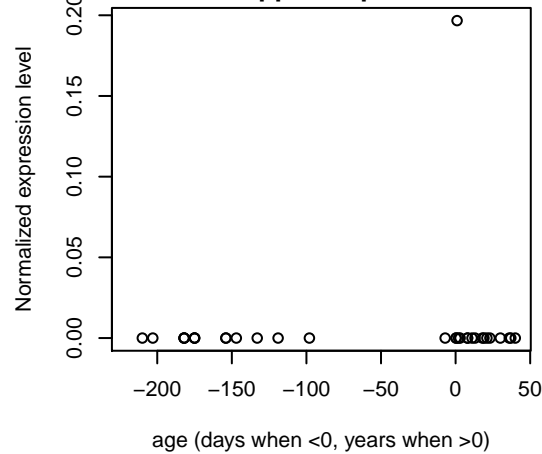

**TBX4\_59557241\_59557330**  
(P=0.3322, Diff = -0.01)  
hippocampus

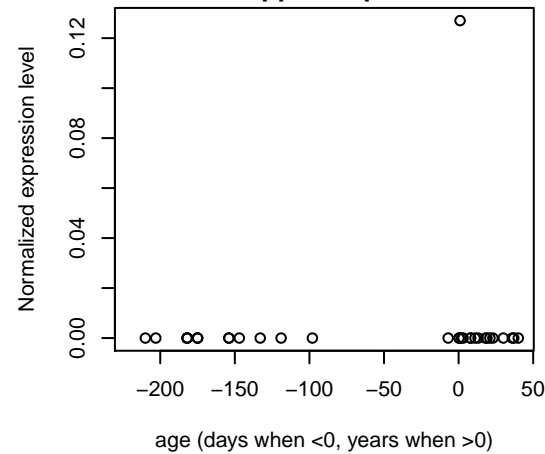

**TBX4\_59557450\_59557680**  
(P=NaN, Diff = 0)  
hippocampus

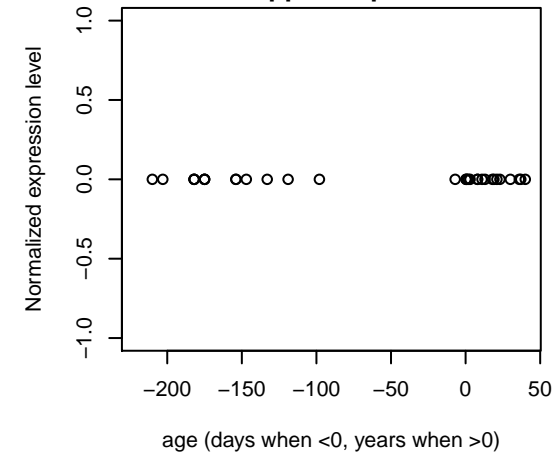

**TBX4\_59560257\_59562469**  
(P=0.3586, Diff = -0.01)  
hippocampus

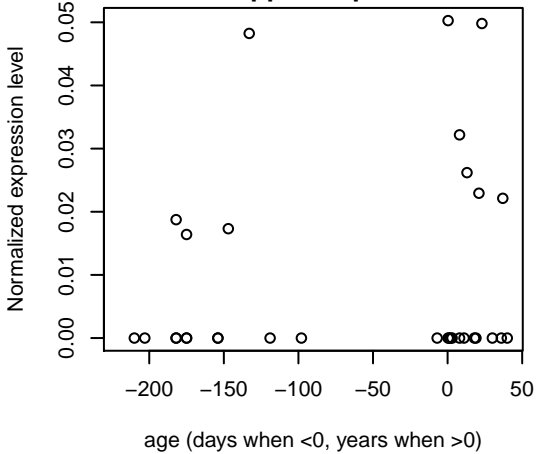

**FRG1\_190861942\_190862226**  
(P=0, Diff = 9.04)  
hippocampus

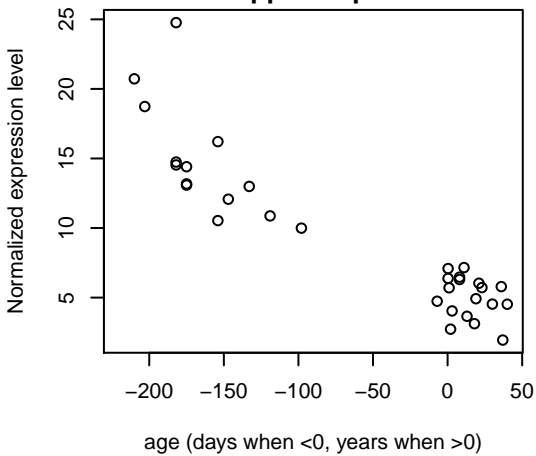

**FRG1\_190862987\_190863159**  
(P=0.034, Diff = -0.07)  
hippocampus

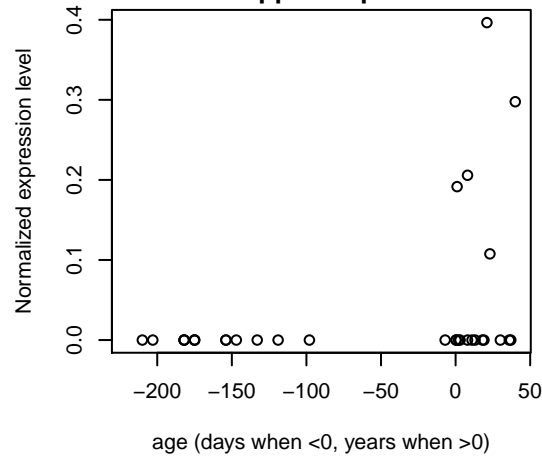

**FRG1\_190864356\_190864427**  
(P=1e-04, Diff = 11.31)  
hippocampus

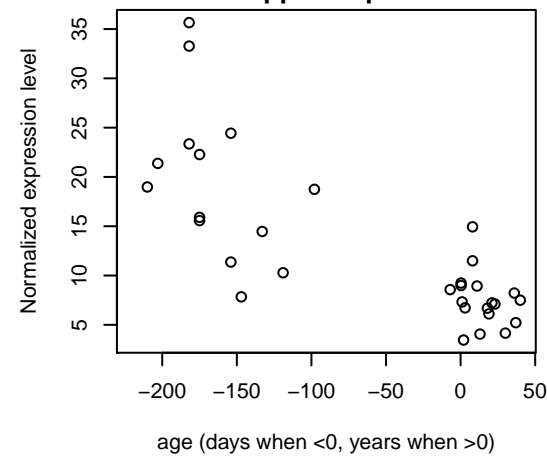

**FRG1\_190873316\_190873442**  
(P=4e-04, Diff = 22.08)  
hippocampus

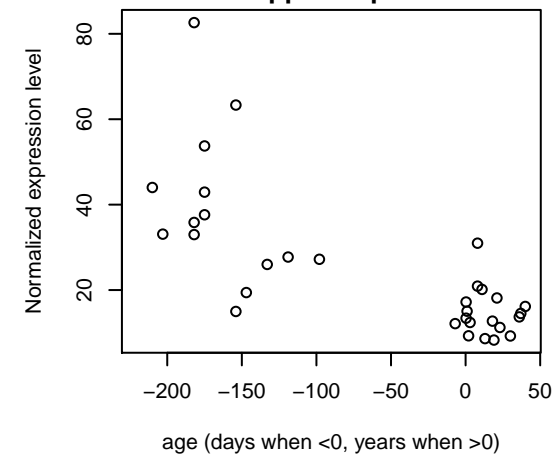

**FRG1\_190874222\_190874280**  
(P=6e-04, Diff = 10.87)  
hippocampus

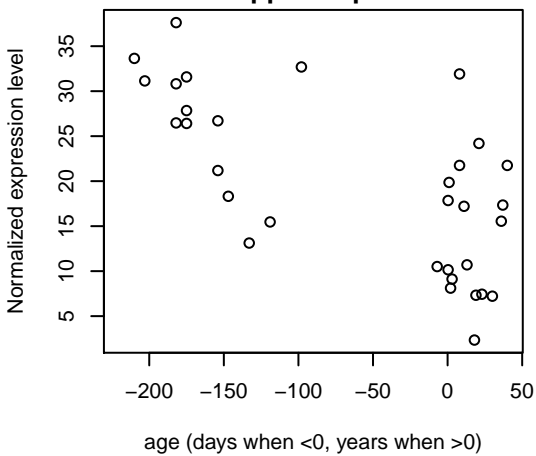

**FRG1\_190876191\_190876306**  
(P=2e-04, Diff = 13.75)  
hippocampus

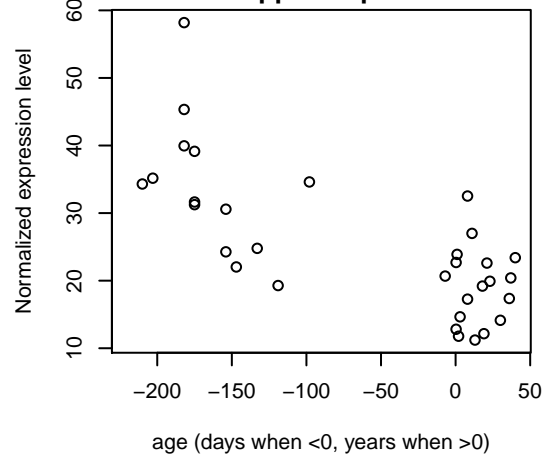

**FRG1\_190878552\_190878657**  
(P=0.2327, Diff = 2.57)  
hippocampus

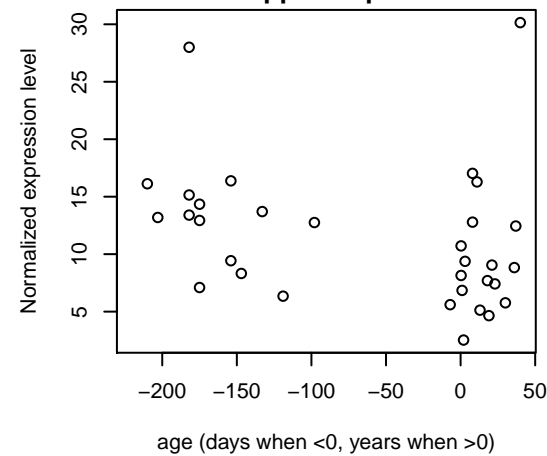

**FRG1\_190881902\_190881994**  
(P=0.3083, Diff = 2.53)  
hippocampus

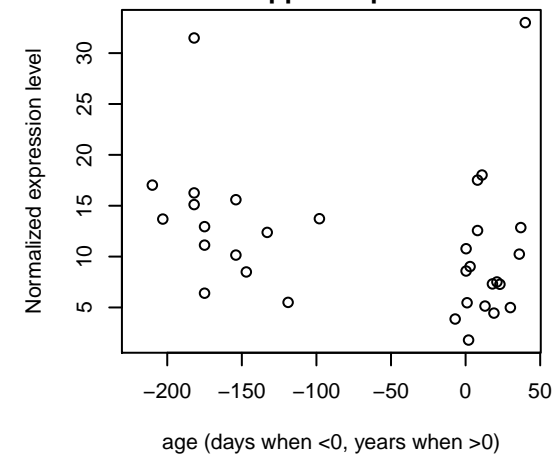

**FRG1\_190882016\_190882355**  
(P=0.023, Diff = 0.34)  
hippocampus

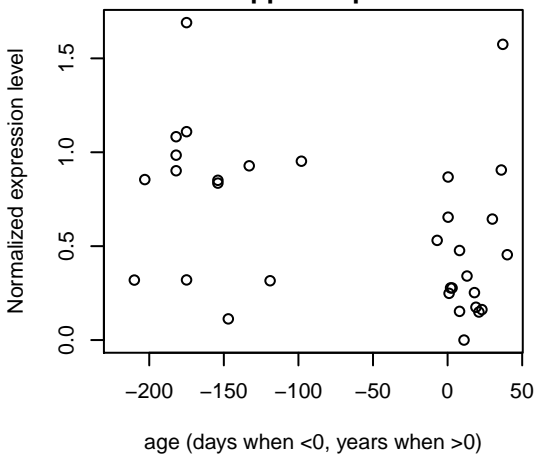

**FRG1\_190882583\_190882705**  
(P=0.7783, Diff = 0.03)  
hippocampus

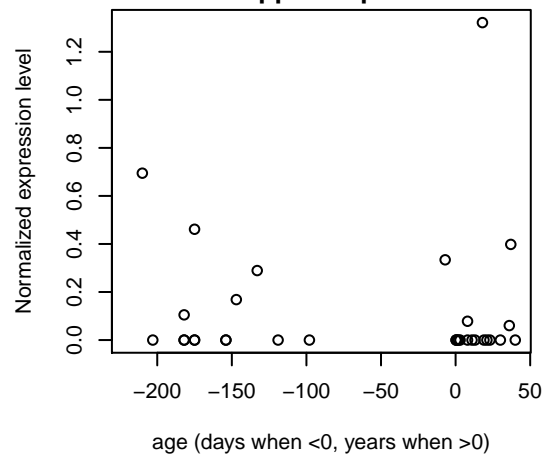

**FRG1\_190882976\_190883087**  
(P=0.1868, Diff = 10.12)  
hippocampus

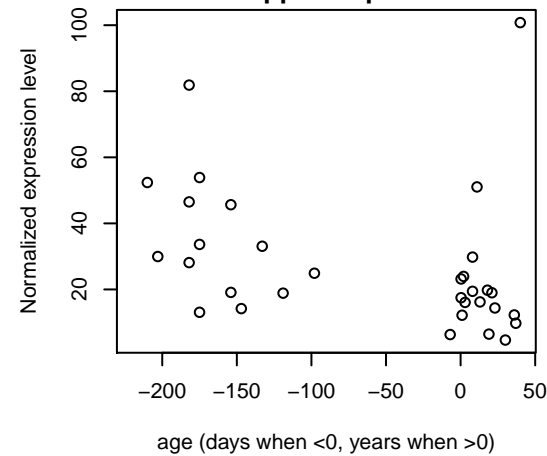

**FRG1\_190884247\_190884359**  
(P=0.3222, Diff = 3.6)  
hippocampus

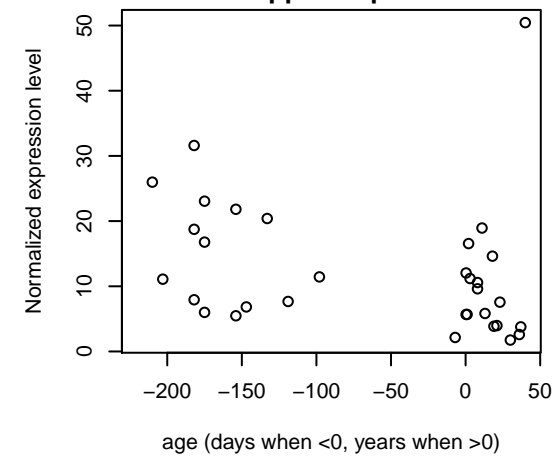



**METTL4\_2537523\_2539144**  
(P=0.4446, Diff = 0.29)  
hippocampus

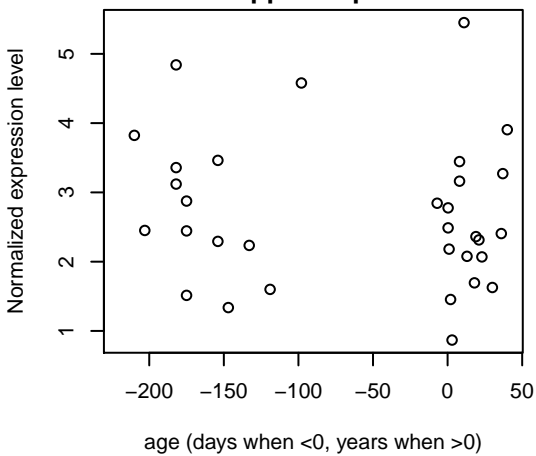

**METTL4\_2544193\_2544285**  
(P=0.0108, Diff = 1.63)  
hippocampus

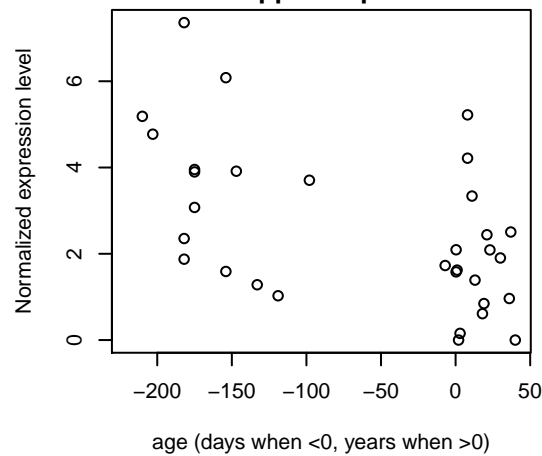

**METTL4\_2544651\_2544758**  
(P=0.0179, Diff = 1.28)  
hippocampus

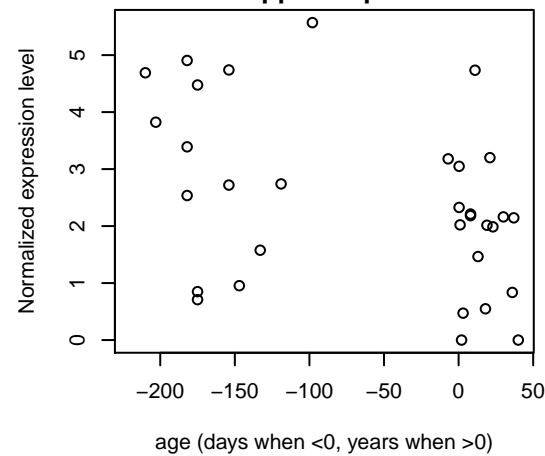

**METTL4\_2547353\_2547528**  
(P=0.0041, Diff = 1.44)  
hippocampus

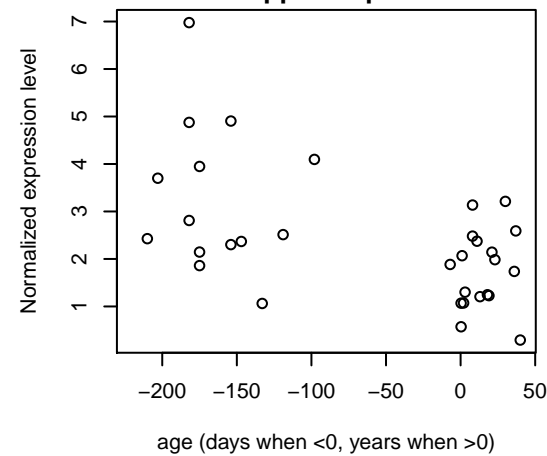

**METTL4\_2552693\_2552763**  
(P=0.0085, Diff = 1.09)  
hippocampus

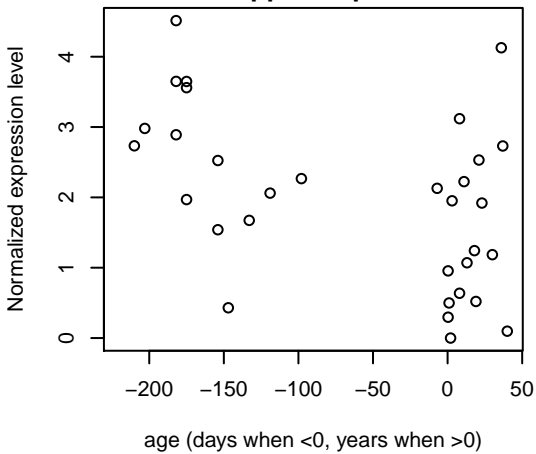

**METTL4\_2554667\_2555037**  
(P=3e-04, Diff = 1.9)  
hippocampus

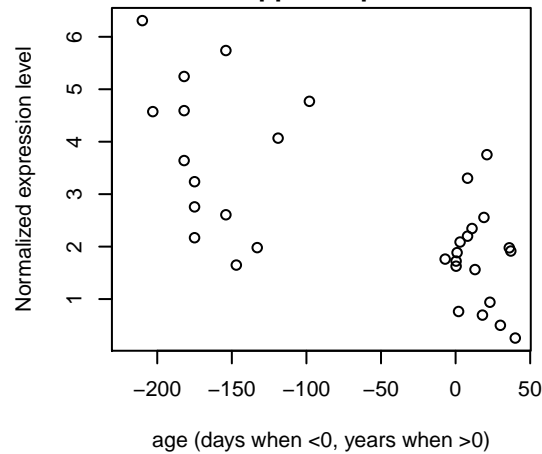

**METTL4\_2563795\_2563858**  
(P=0.0699, Diff = 0.95)  
hippocampus

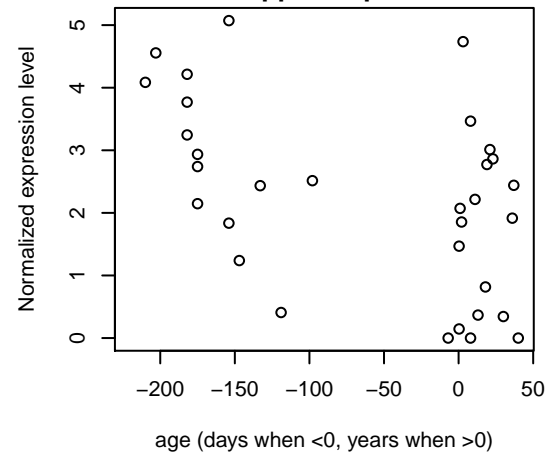

**METTL4\_2566819\_2567653**  
(P=3e-04, Diff = 1.74)  
hippocampus

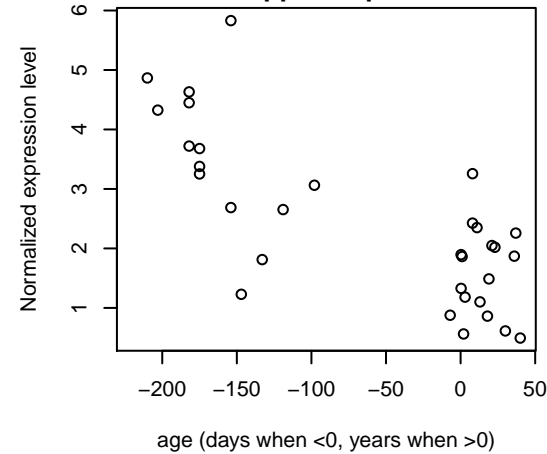

**METTL4\_2571147\_2571508**  
(P=0.0811, Diff = 0.51)  
hippocampus

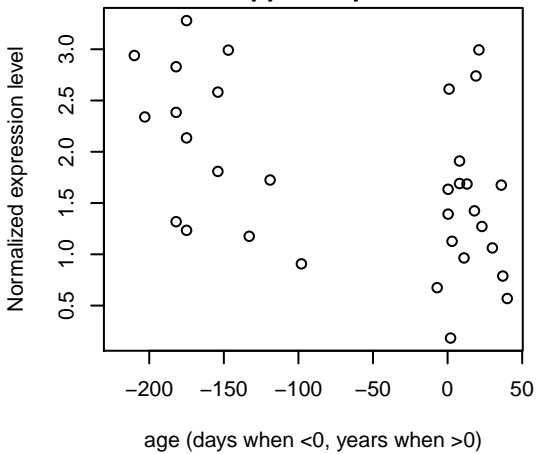

**C7orf11\_40172341\_40172858**  
(P=0.0091, Diff = 6.27)  
**hippocampus**

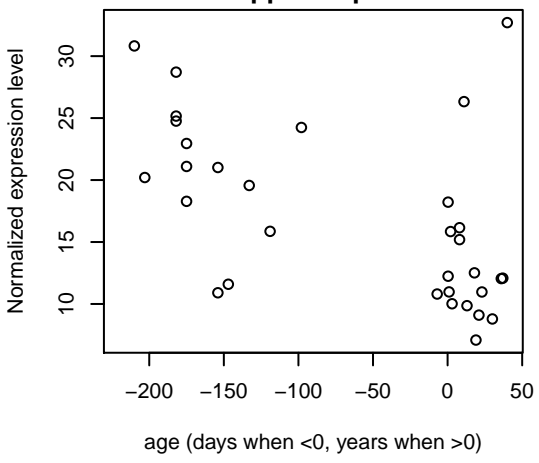

**C7orf11\_40173827\_40174258**  
(P=2e-04, Diff = 11.94)  
**hippocampus**

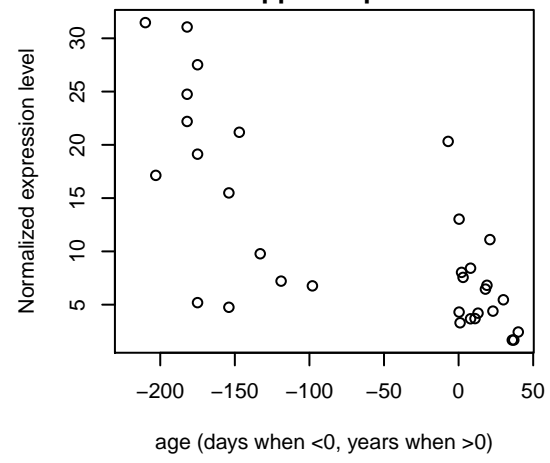

**KLF13\_31619057\_31619992**  
(P=0.3619, Diff = 0.42)  
inferolateral temporal cortex

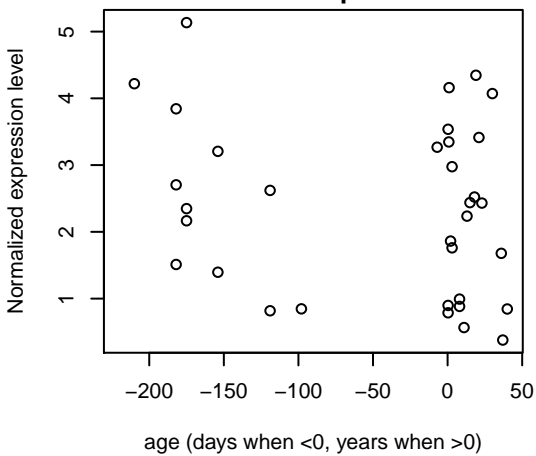

**KLF13\_31632135\_31632190**  
(P=0.5691, Diff = -0.03)  
inferolateral temporal cortex

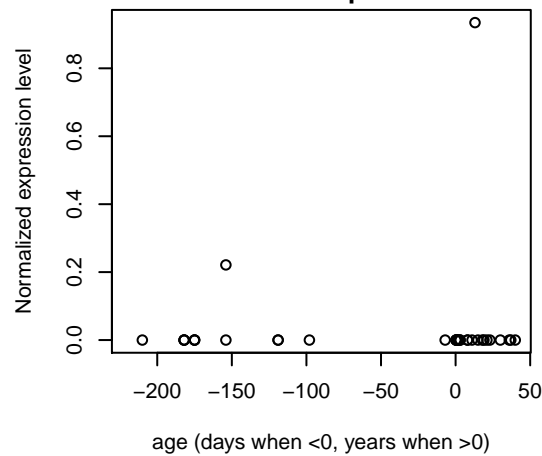

**KLF13\_31658356\_31658757**  
(P=0.0015, Diff = -0.21)  
inferolateral temporal cortex

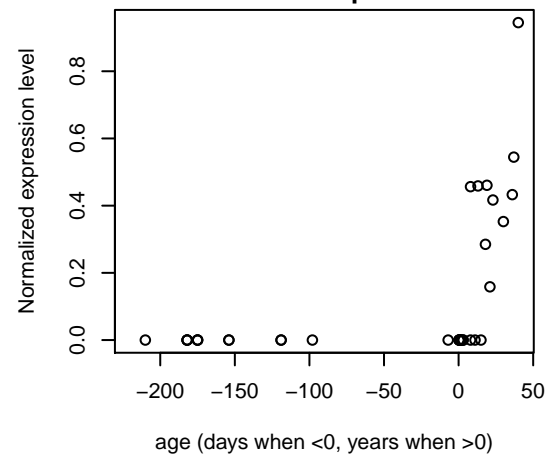

**KLF13\_31664212\_31670102**  
(P=1e-04, Diff = -10.28)  
inferolateral temporal cortex

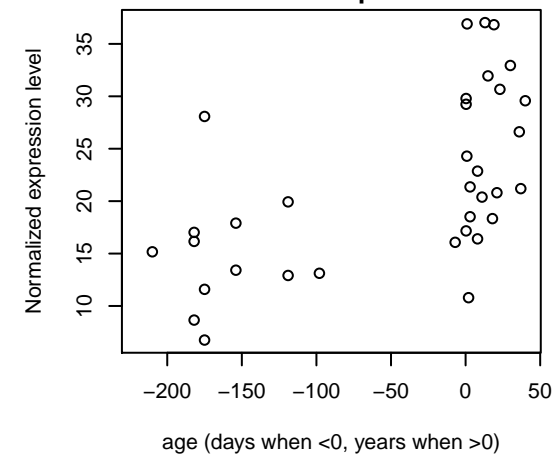

**KLF13\_31685045\_31685458**  
(P=0.0995, Diff = -0.05)  
inferolateral temporal cortex

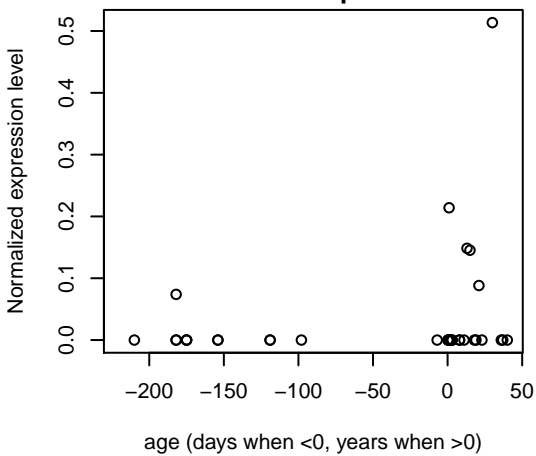

**KLF13\_31685777\_31685894**  
(P=0.0371, Diff = -0.1)  
inferolateral temporal cortex

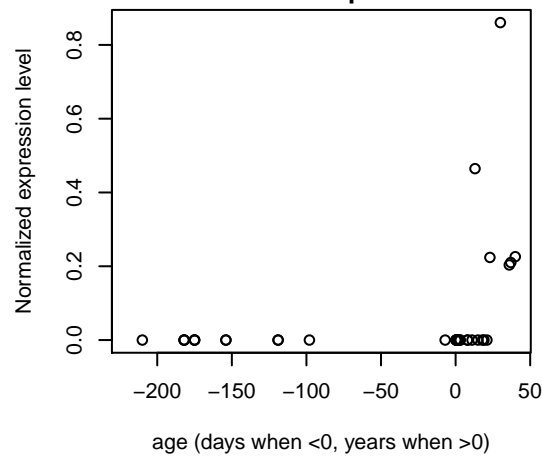

**KLF13\_31695630\_31696113**  
(P=0.0054, Diff = -0.13)  
inferolateral temporal cortex

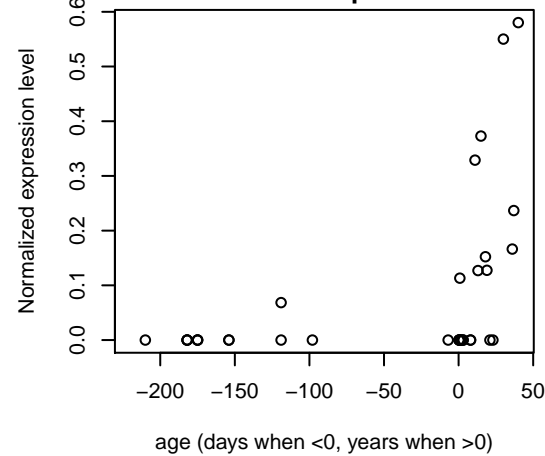

**KLF13\_31727572\_31727868**  
(P=0.1874, Diff = -0.06)  
inferolateral temporal cortex

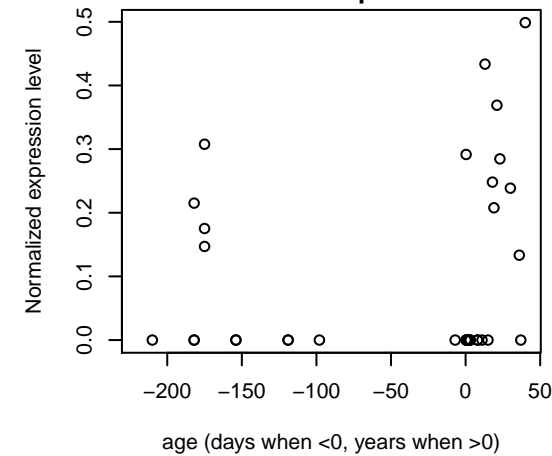

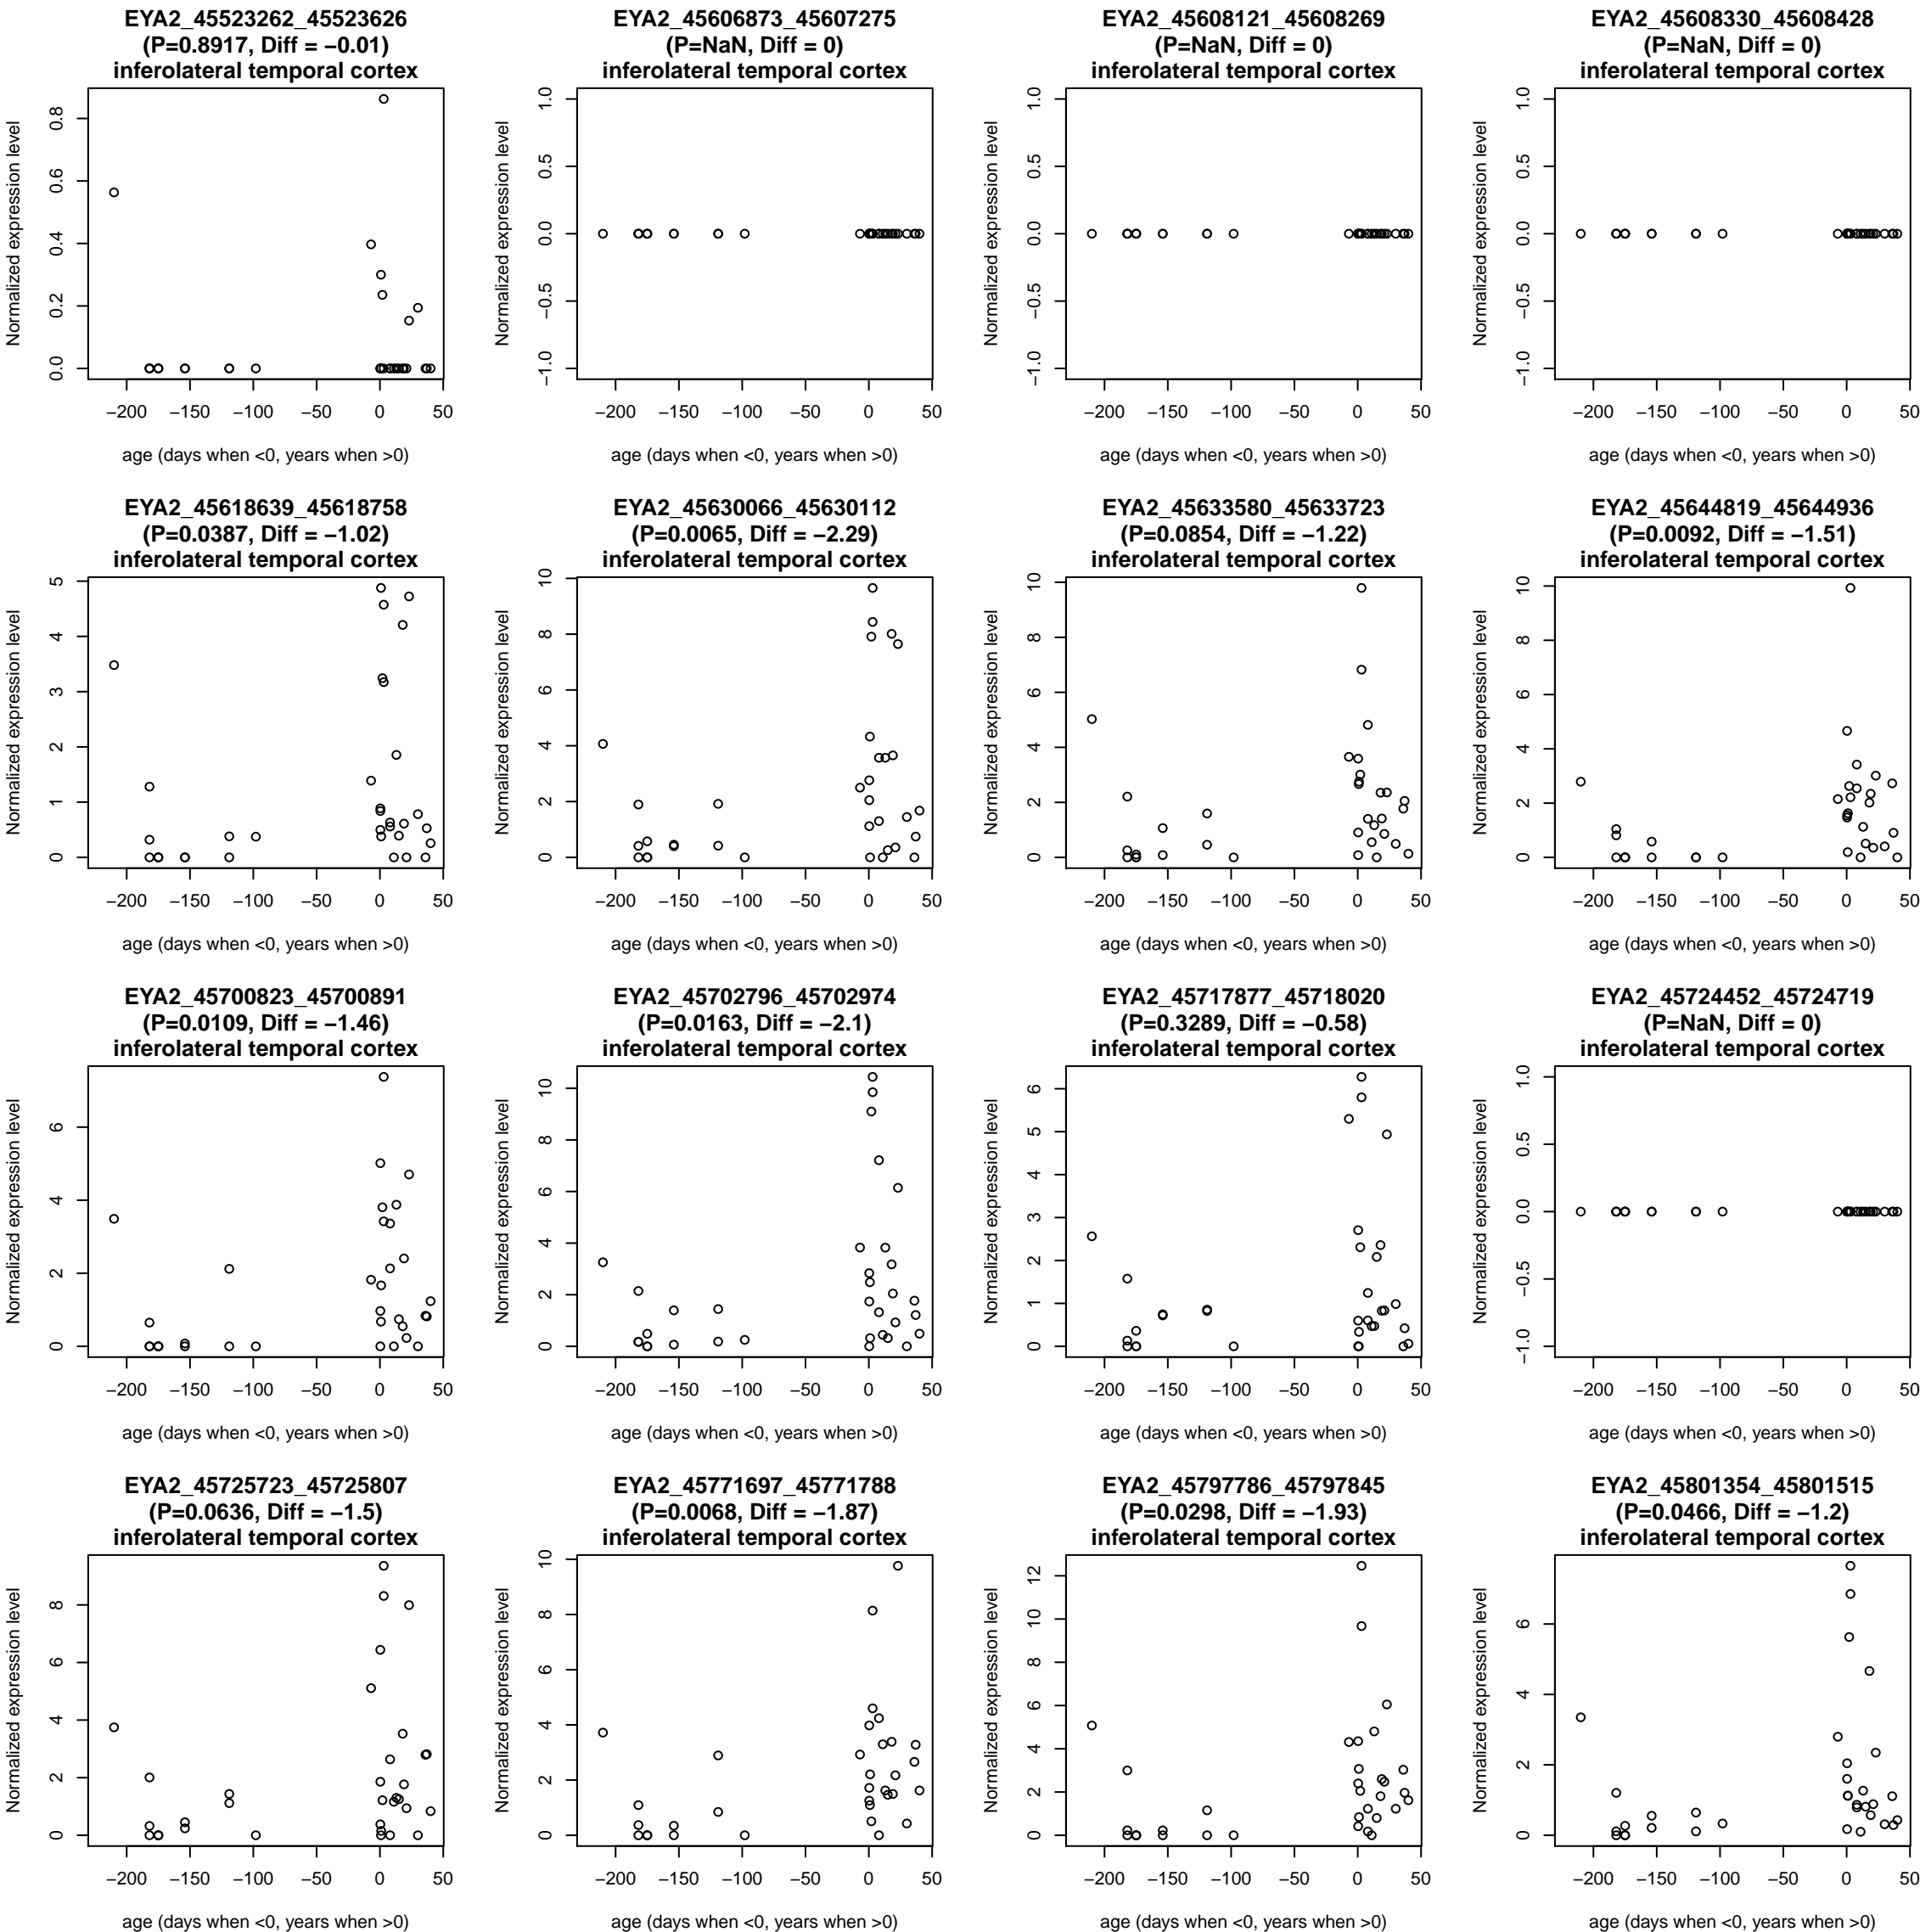

**EYA2\_45808445\_45808564**  
(P=0.0326, Diff = -2.27)  
inferolateral temporal cortex

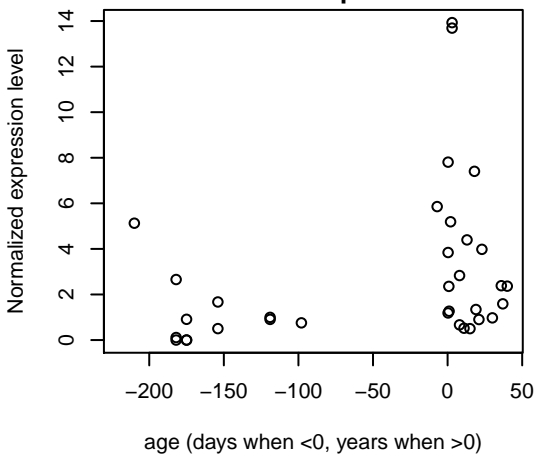

**EYA2\_45809462\_45809584**  
(P=0.0116, Diff = -2.44)  
inferolateral temporal cortex

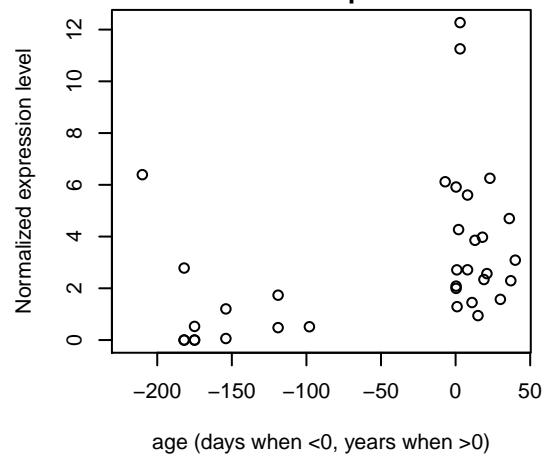

**EYA2\_45811938\_45812039**  
(P=7e-04, Diff = -4.49)  
inferolateral temporal cortex

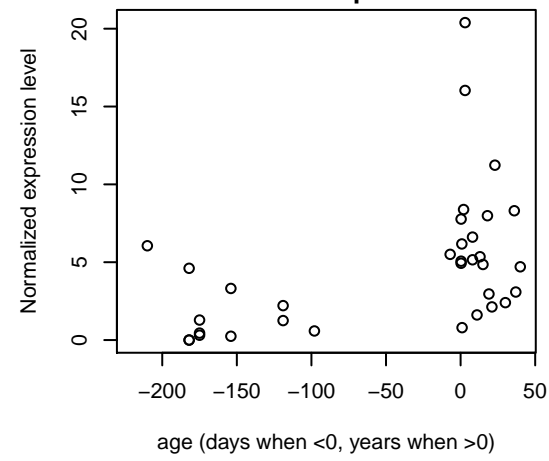

**EYA2\_45816700\_45817492**  
(P=2e-04, Diff = -4.07)  
inferolateral temporal cortex

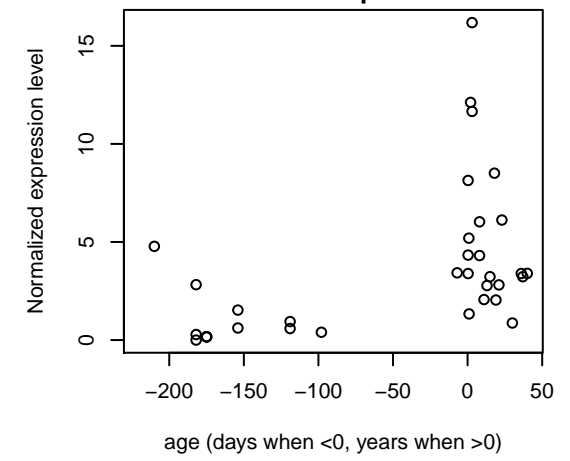

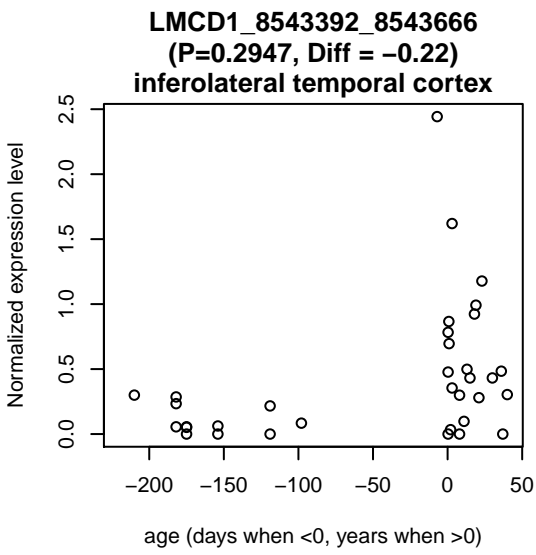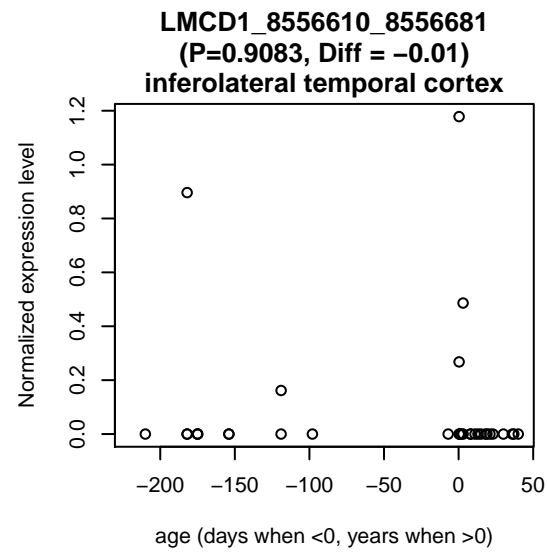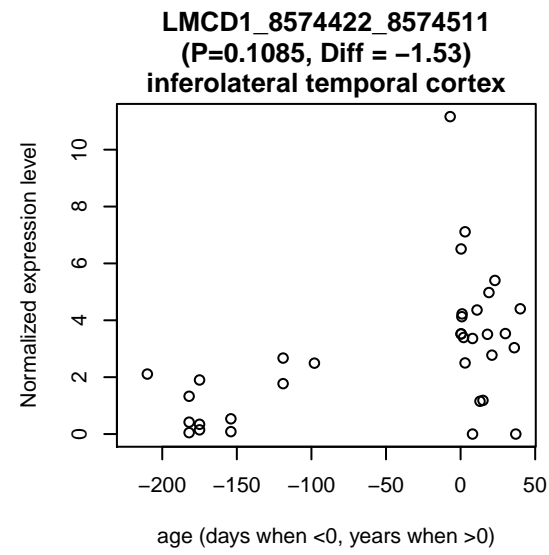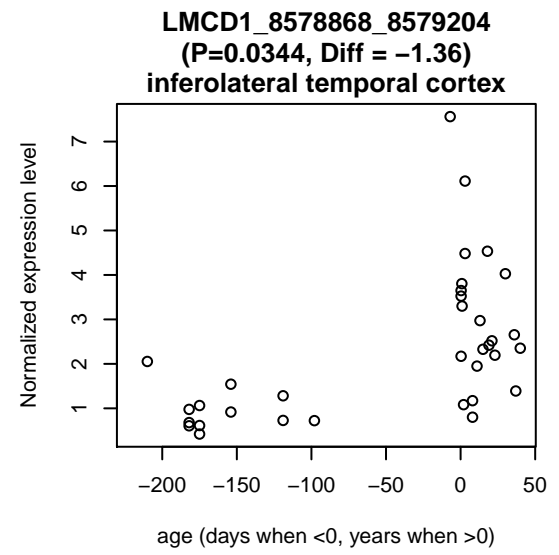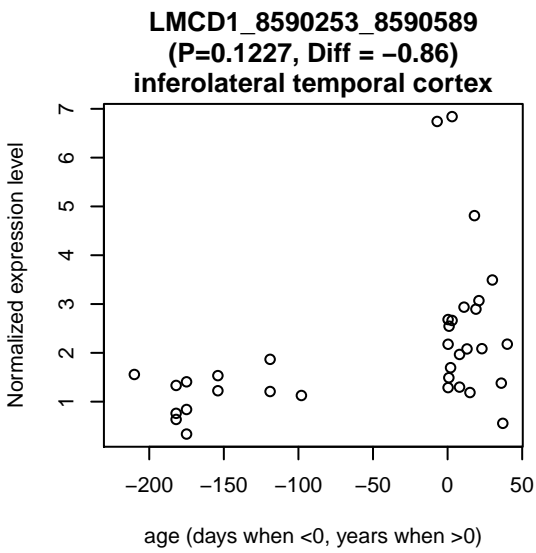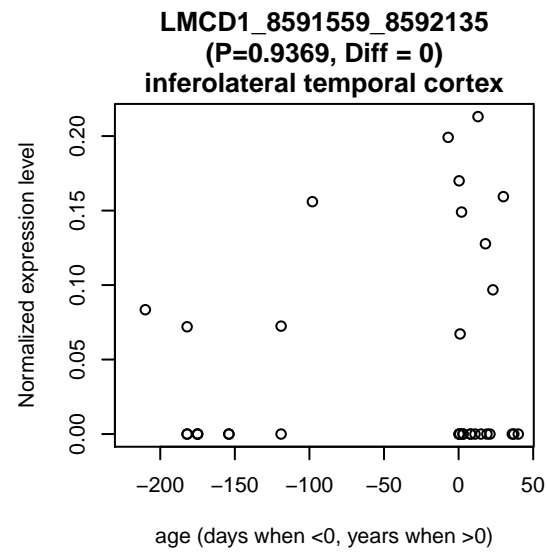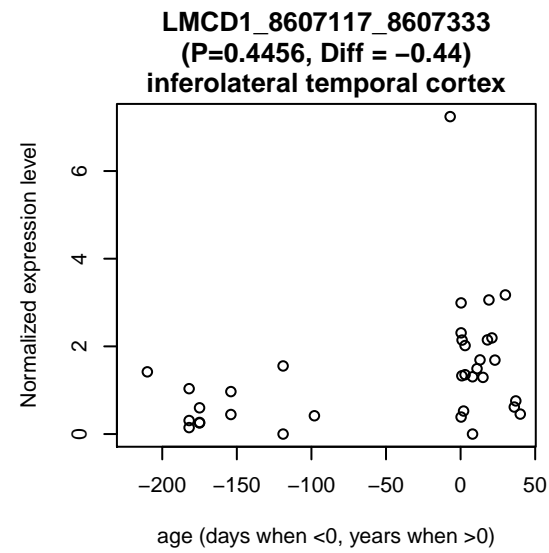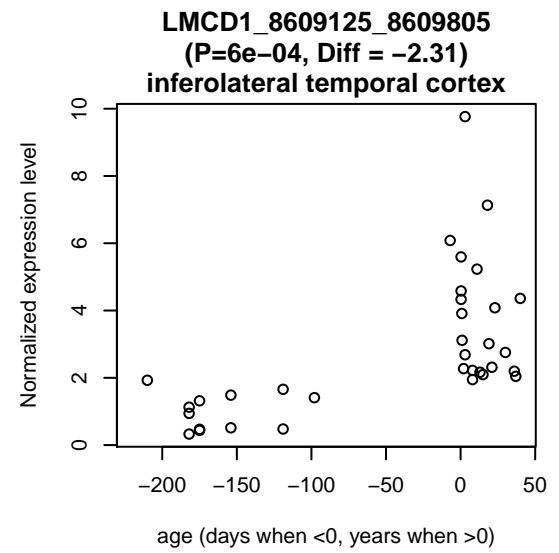

**WVOX\_78133550\_78133782**  
(P=0.8227, Diff = 0.13)  
inferolateral temporal cortex

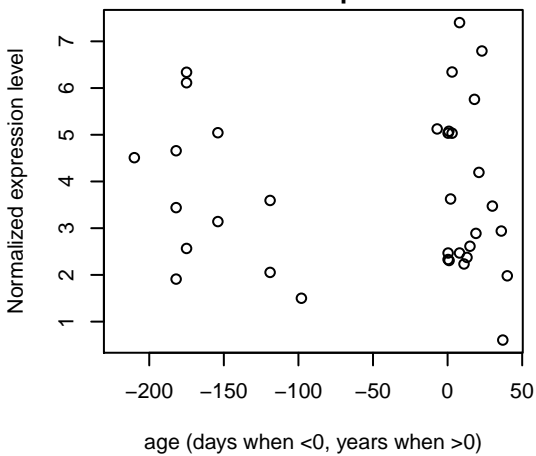

**WVOX\_78142319\_78142384**  
(P=0.0374, Diff = -2.34)  
inferolateral temporal cortex

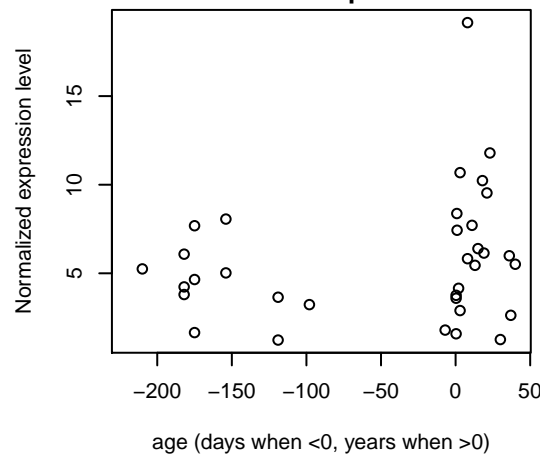

**WVOX\_78143674\_78143732**  
(P=0.0662, Diff = -2.08)  
inferolateral temporal cortex

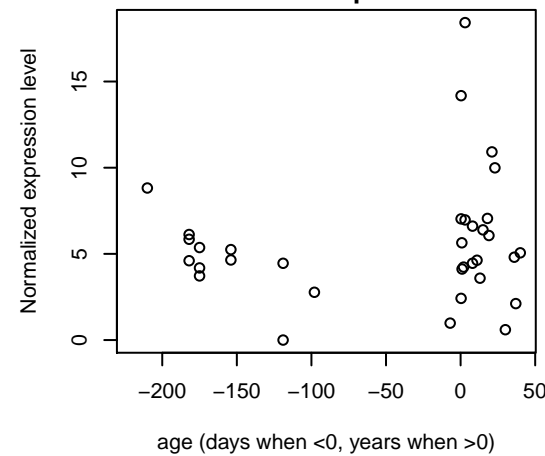

**WVOX\_78148872\_78149051**  
(P=0.086, Diff = -0.95)  
inferolateral temporal cortex

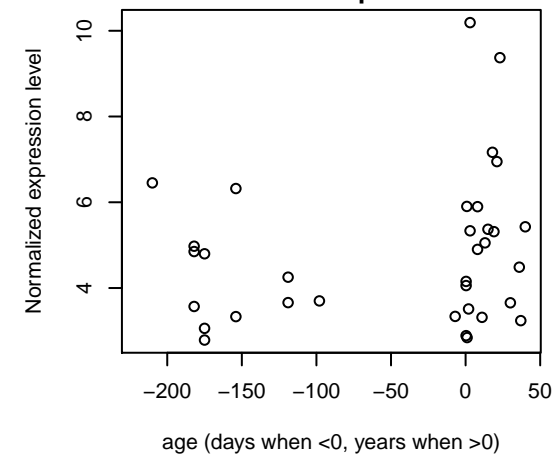

**WVOX\_78198079\_78198186**  
(P=0.012, Diff = -2.08)  
inferolateral temporal cortex

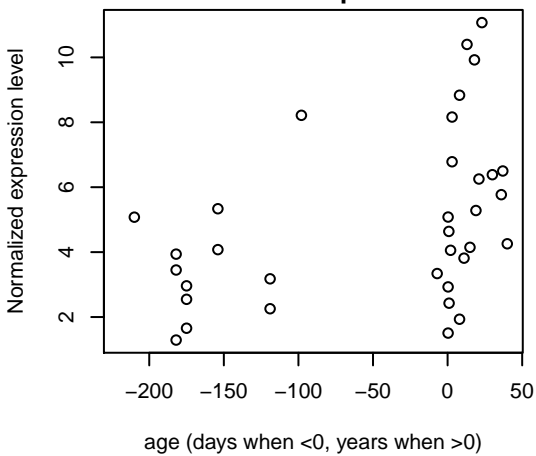

**WVOX\_78312499\_78312593**  
(P=0.3293, Diff = -0.01)  
inferolateral temporal cortex

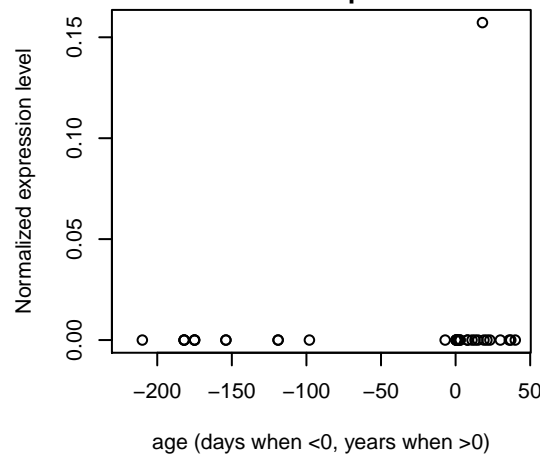

**WVOX\_78420756\_78420845**  
(P=2e-04, Diff = -4.21)  
inferolateral temporal cortex

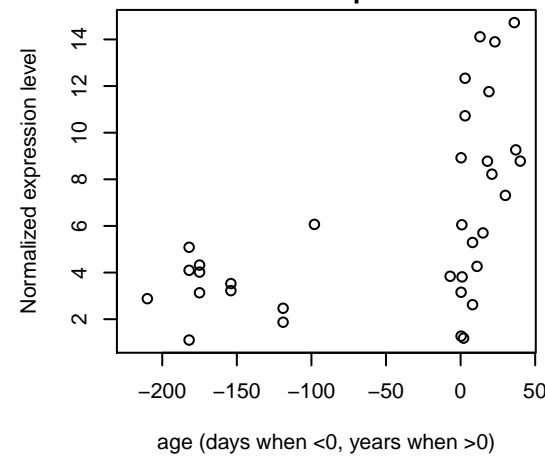

**WVOX\_78458766\_78458952**  
(P=0, Diff = -4.31)  
inferolateral temporal cortex

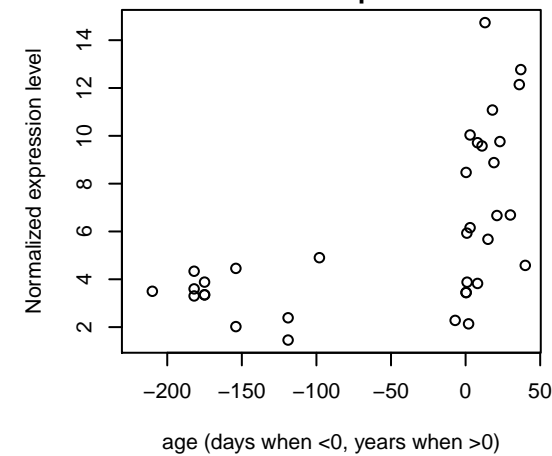

**WVOX\_78466384\_78466649**  
(P=2e-04, Diff = -3.26)  
inferolateral temporal cortex

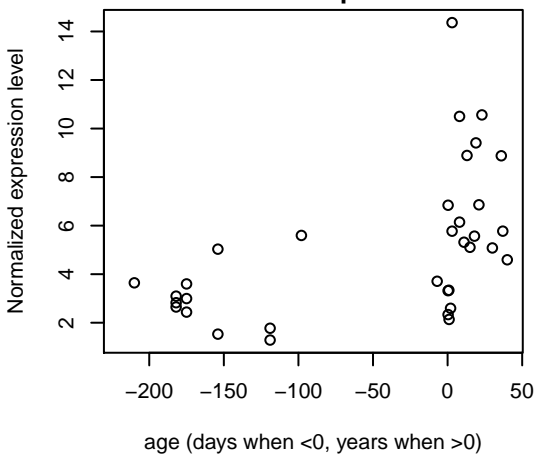

**WVOX\_78790836\_78790912**  
(P=0.1463, Diff = -0.06)  
inferolateral temporal cortex

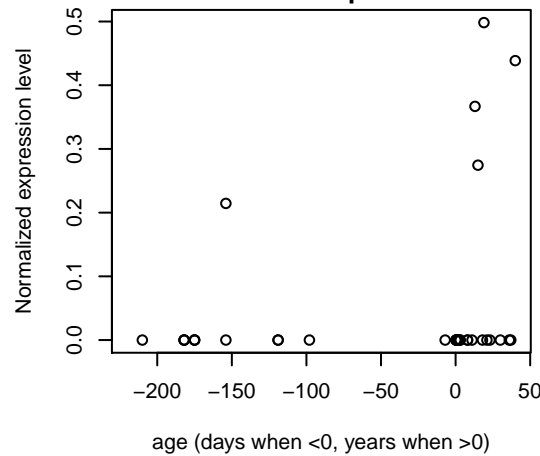

**WVOX\_79245504\_79246031**  
(P=1e-04, Diff = -2.78)  
inferolateral temporal cortex

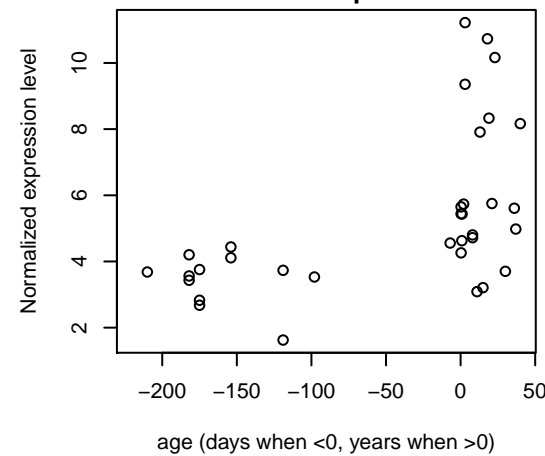

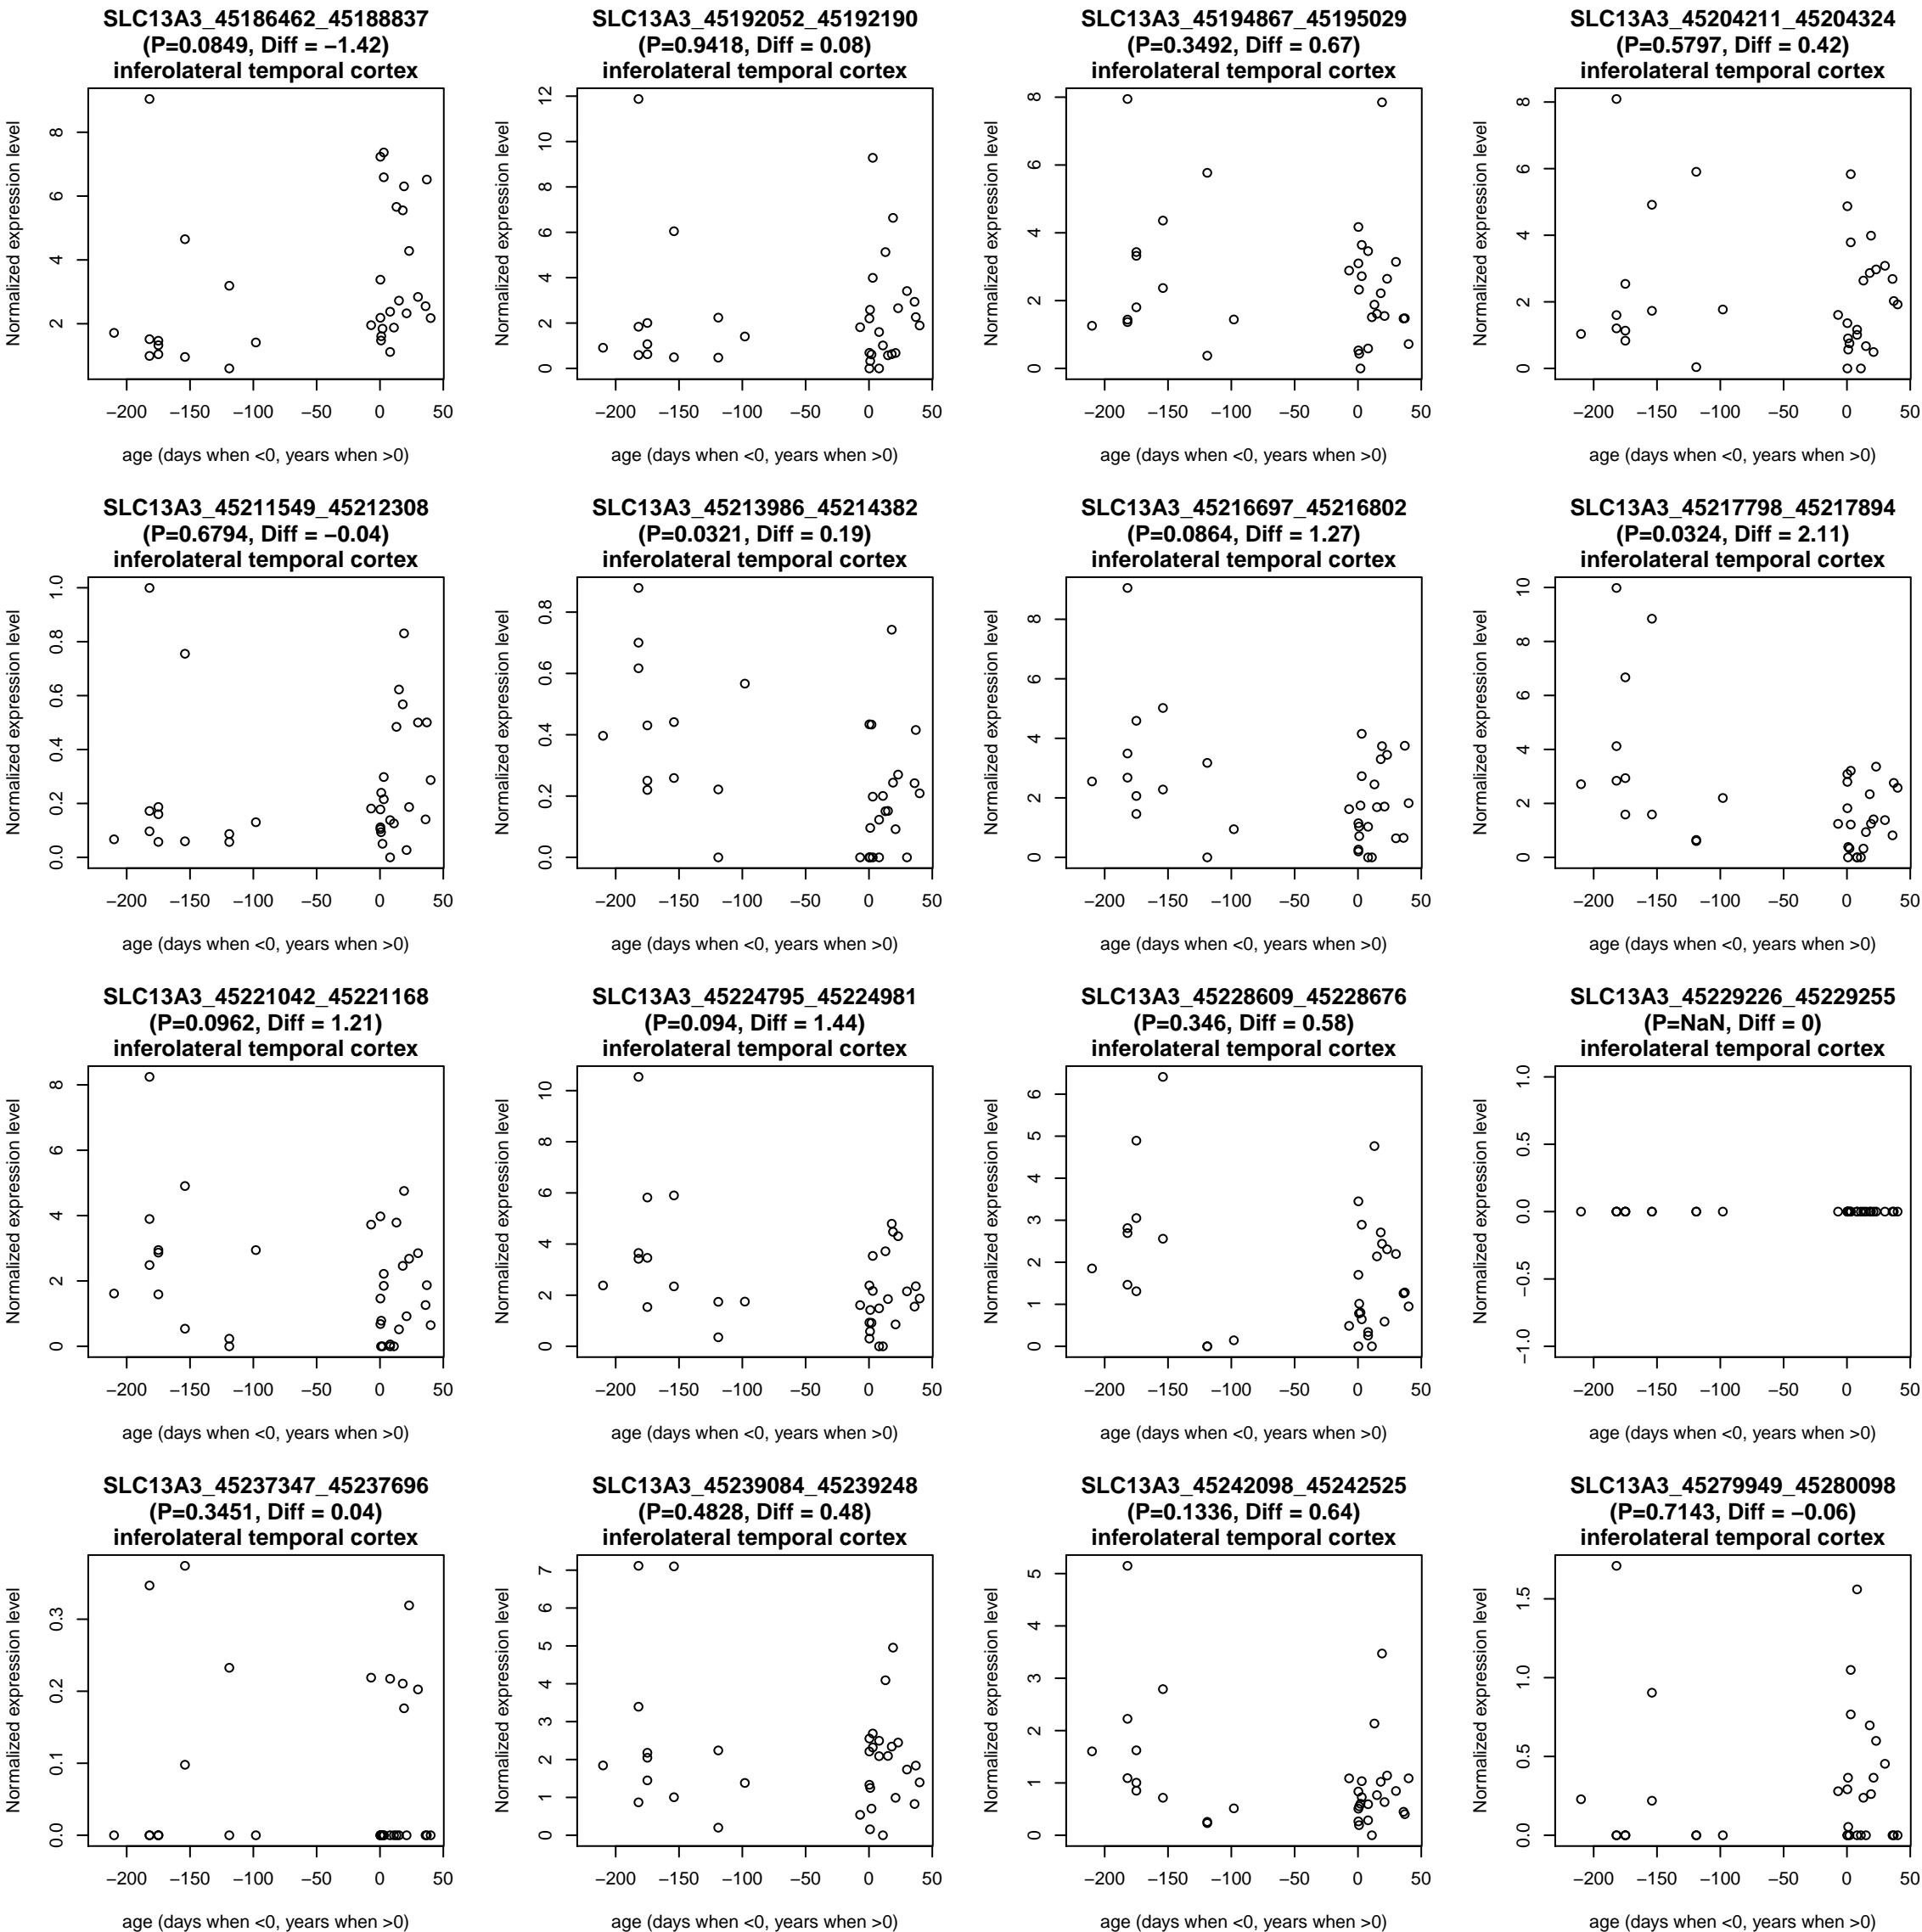



**SLC13A3\_45298681\_45298778**  
(P=0.003, Diff = 1.29)  
inferolateral temporal cortex

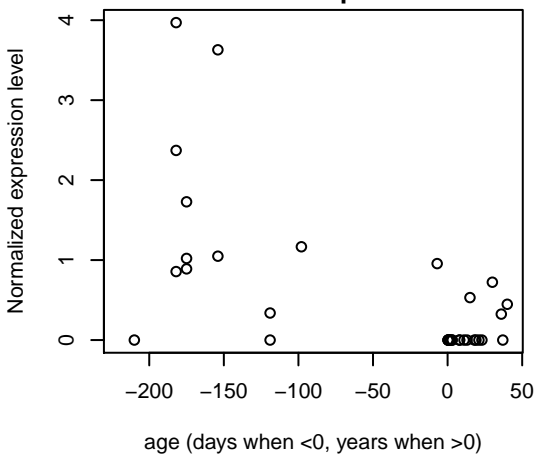

**SLC13A3\_45302302\_45302417**  
(P=0.6206, Diff = 0.08)  
inferolateral temporal cortex

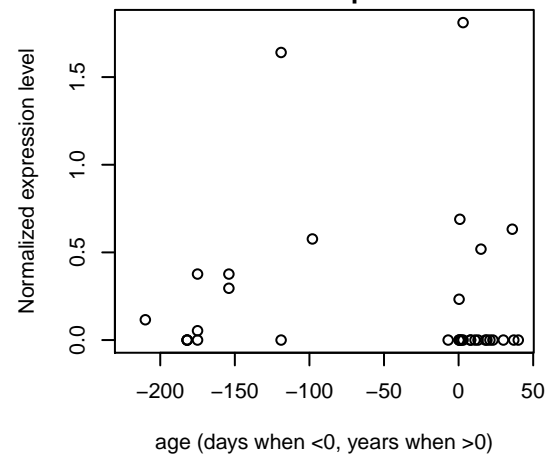

**SLC13A3\_45304585\_45304714**  
(P=0.5396, Diff = -0.04)  
inferolateral temporal cortex

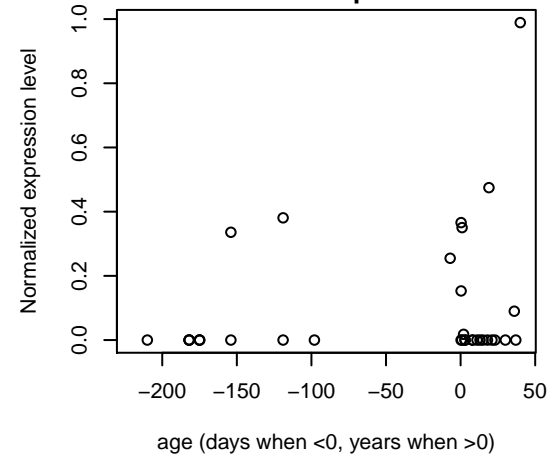

**HTR1B\_78171947\_78173490**  
**(P=0.8001, Diff = 0.05)**  
**inferolateral temporal cortex**

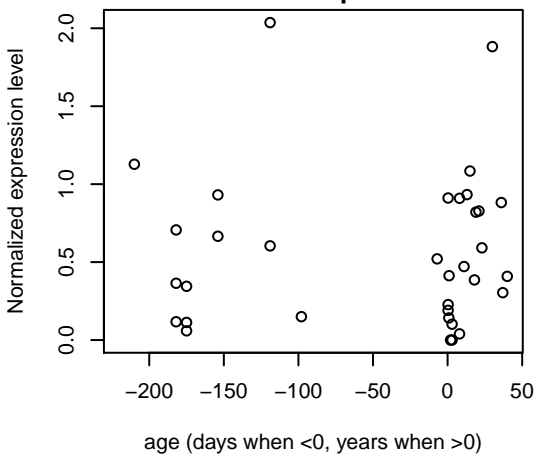

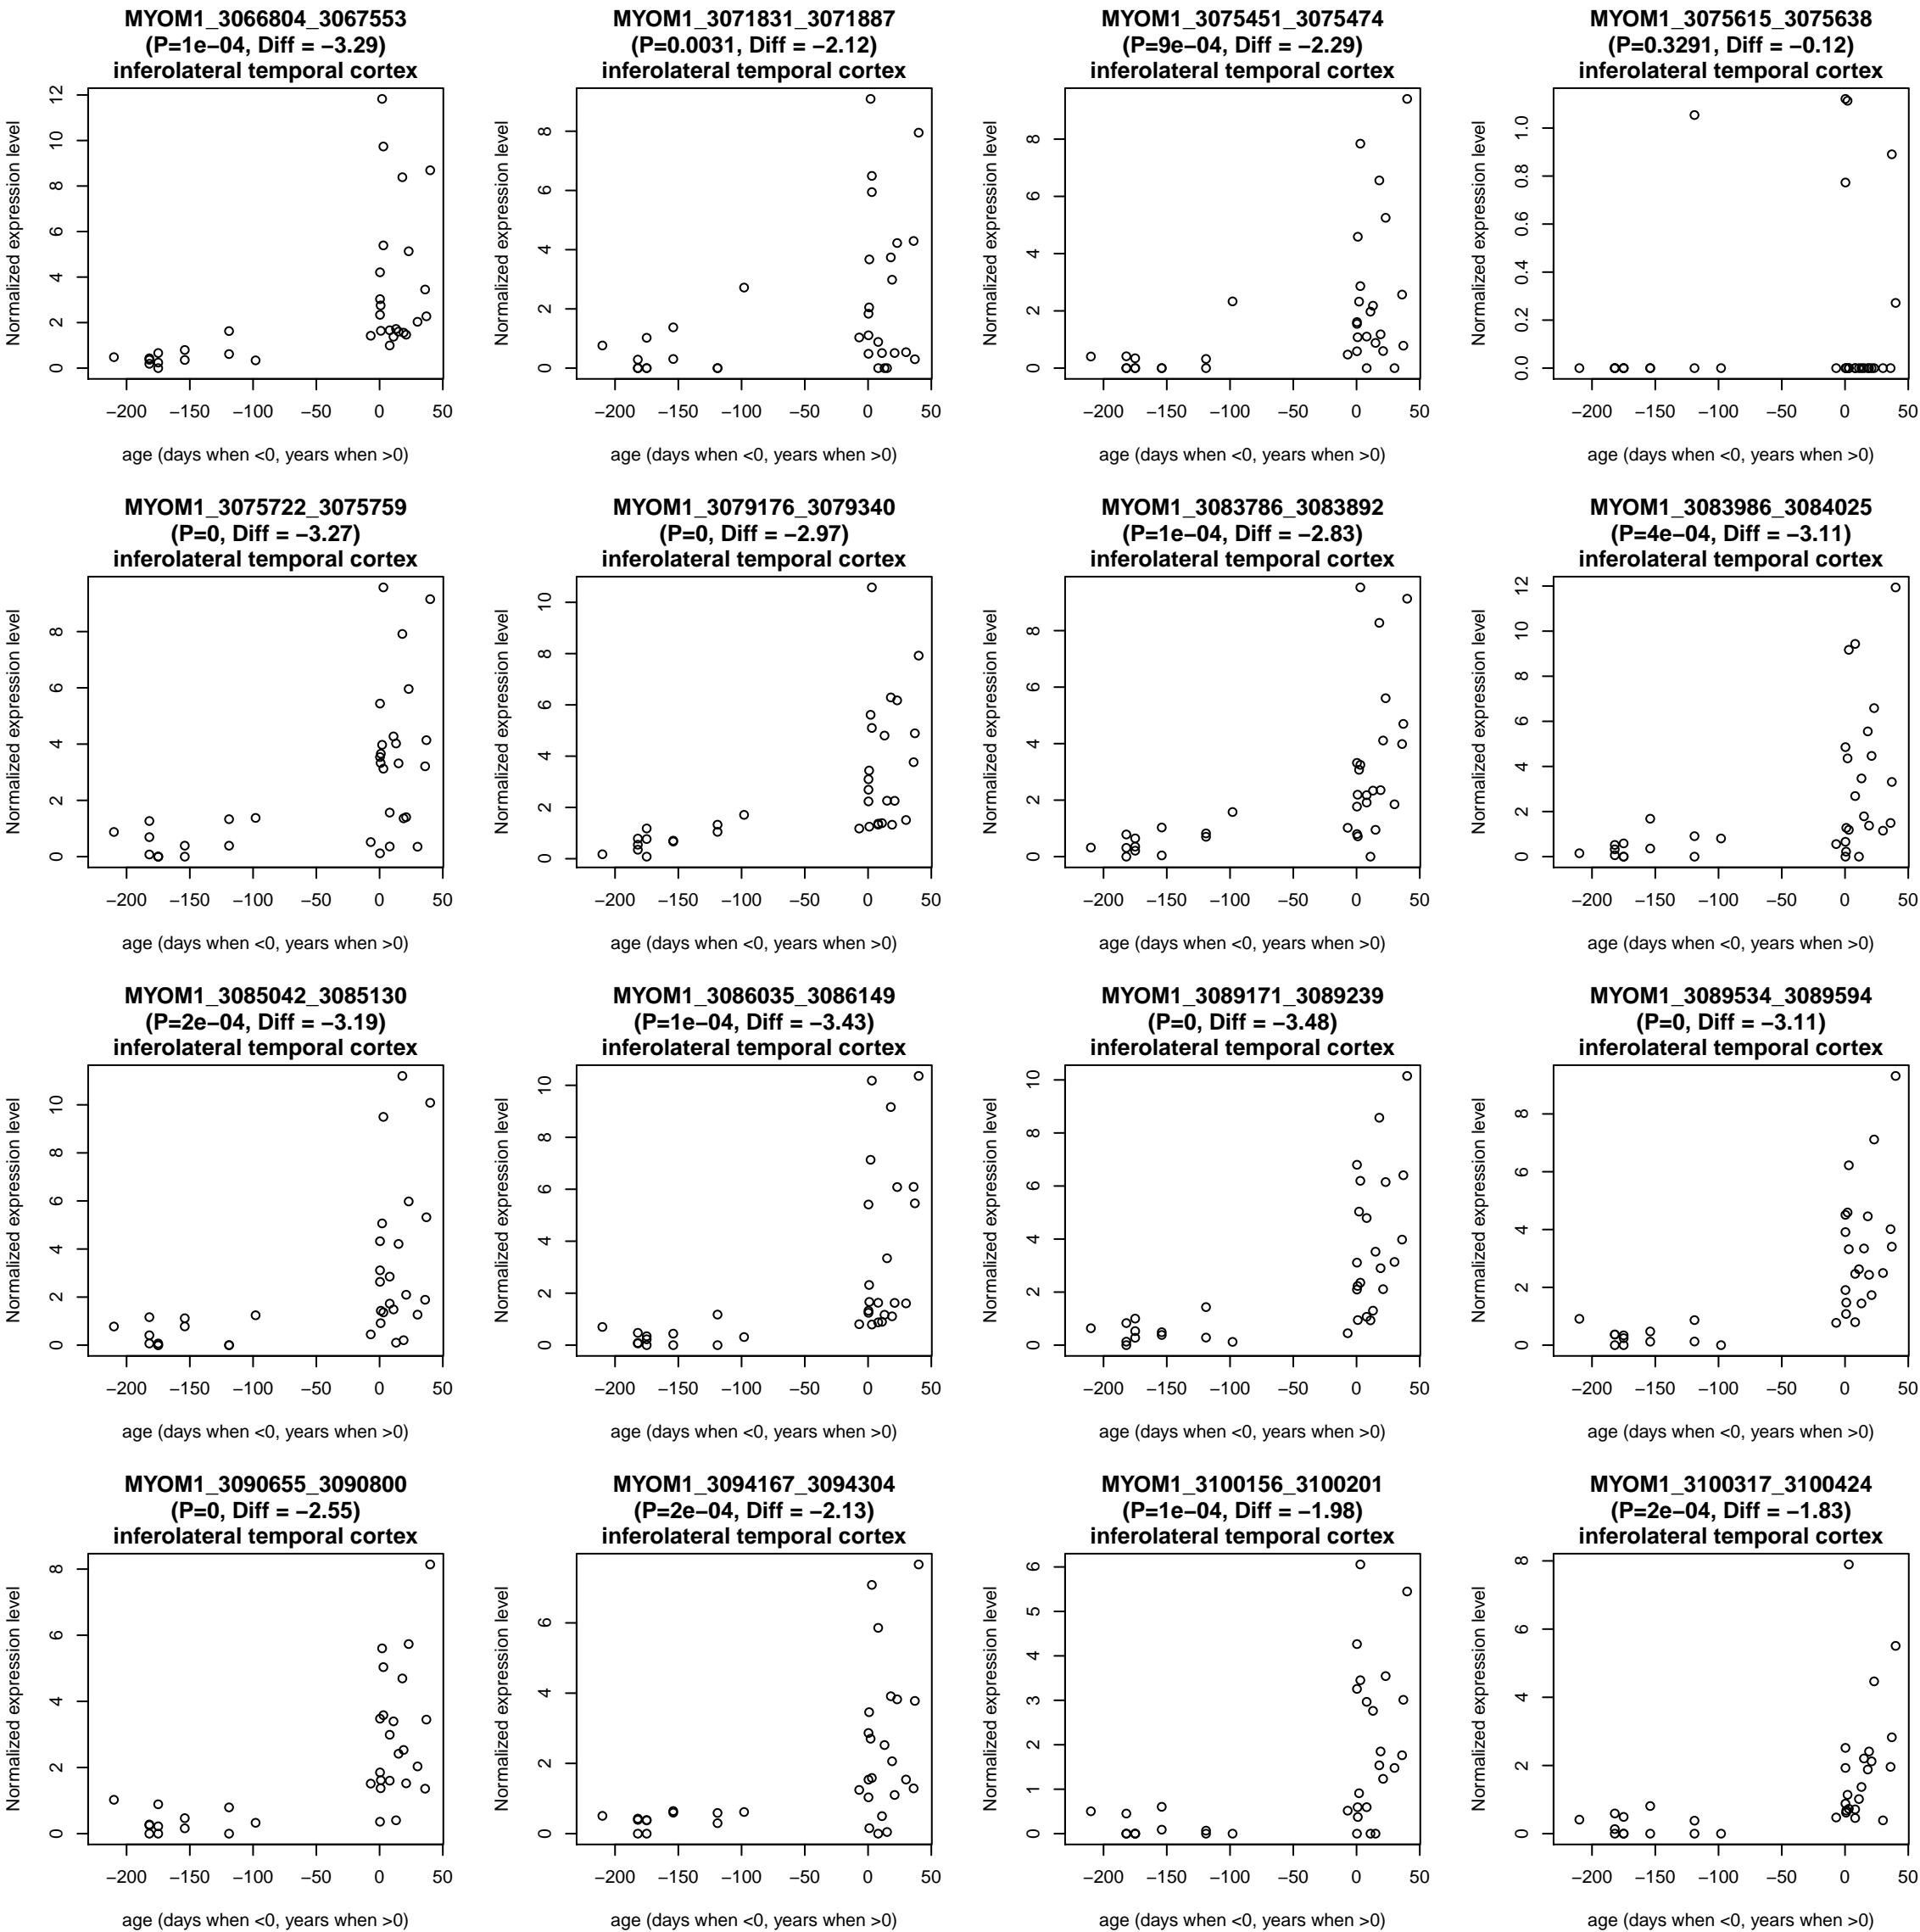

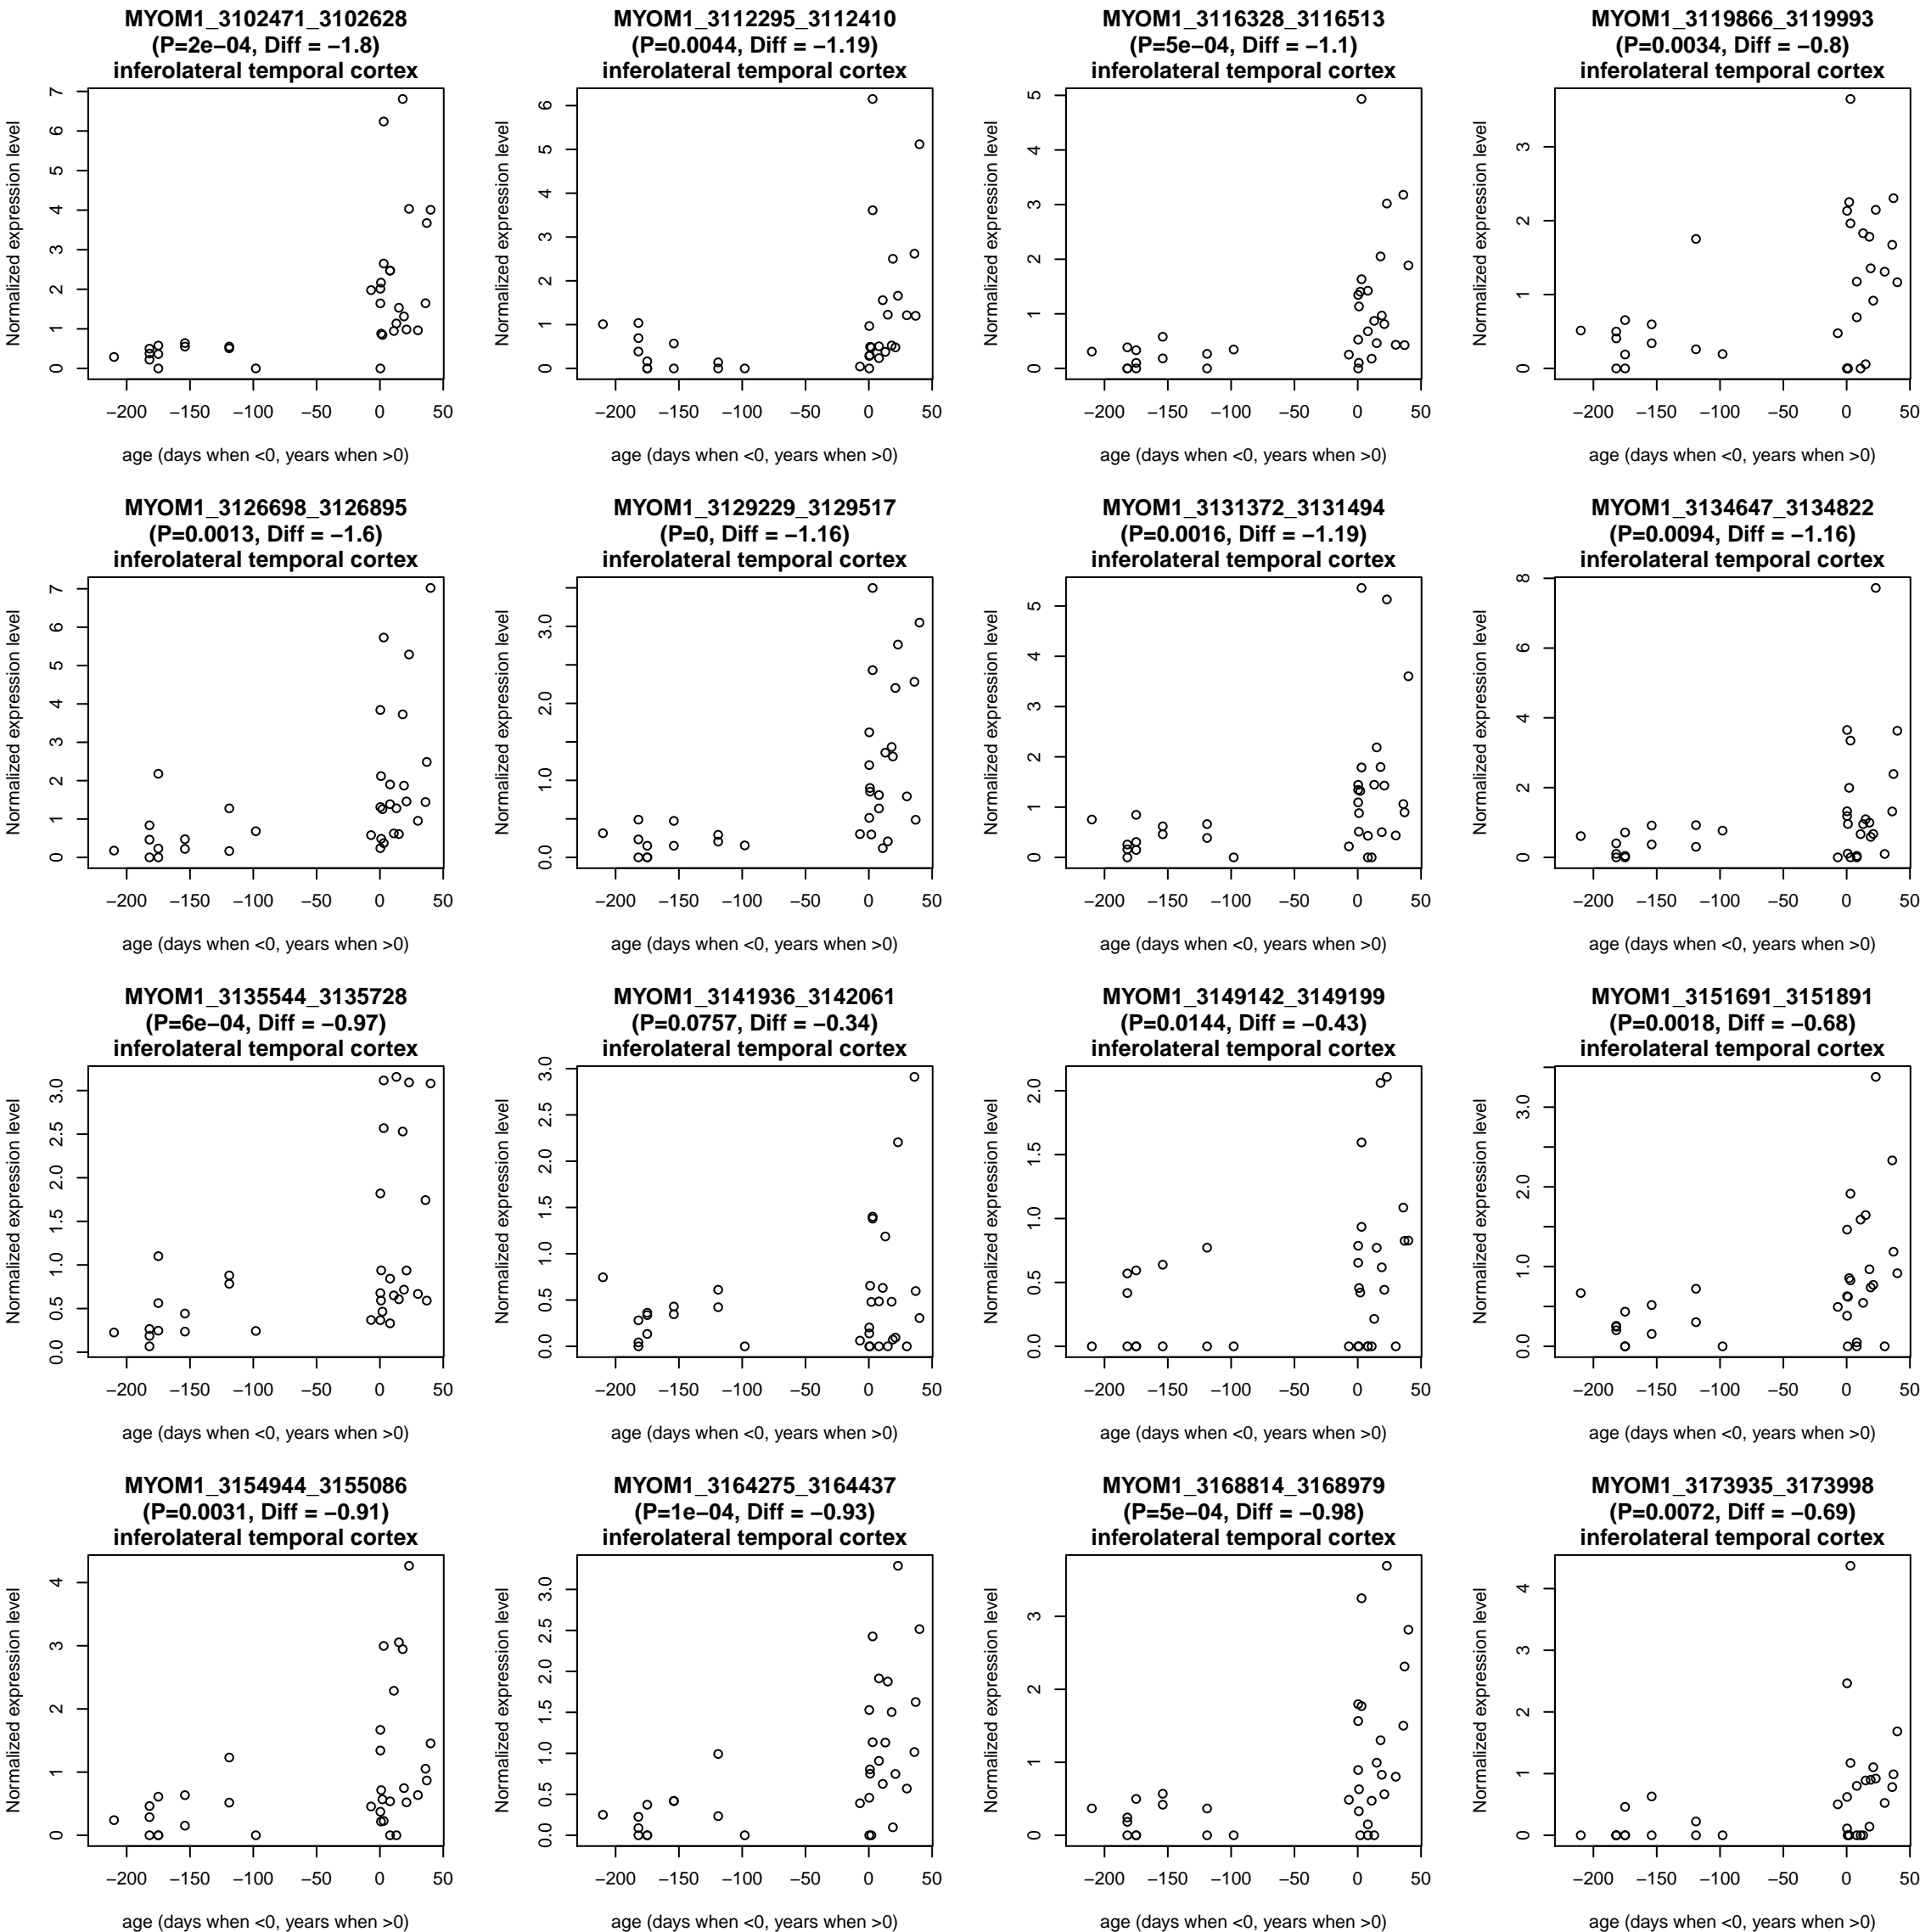

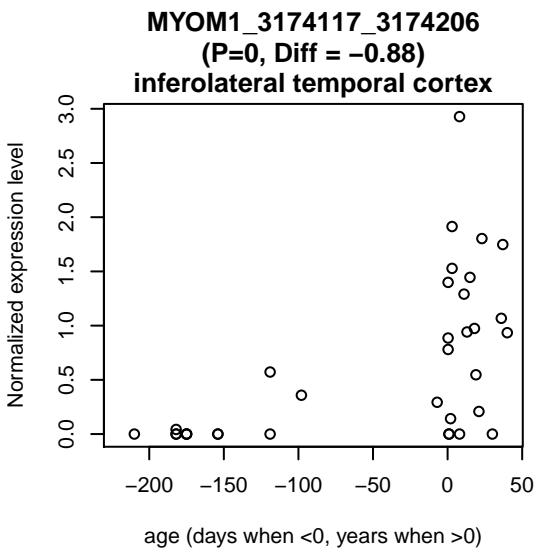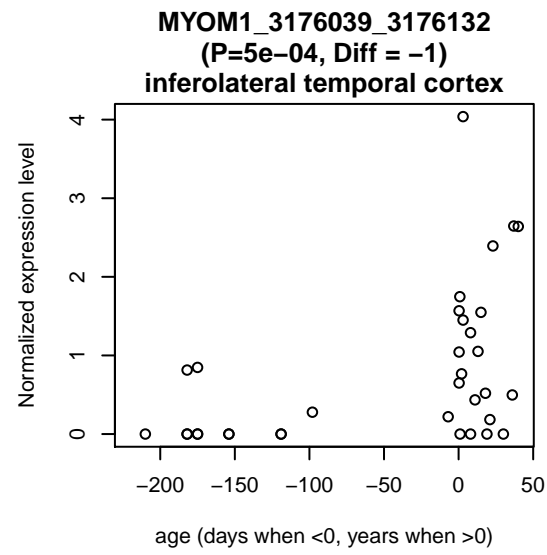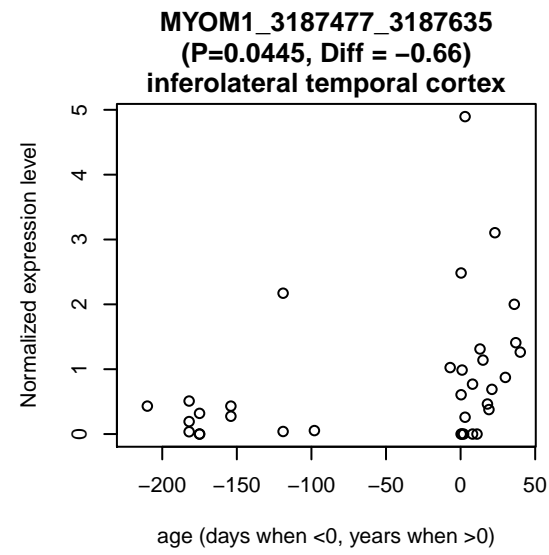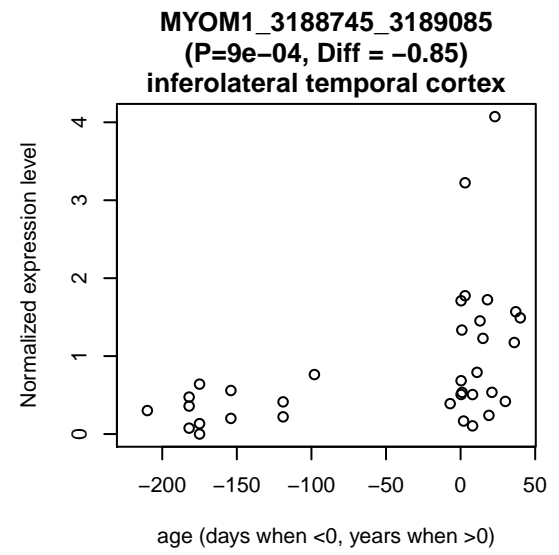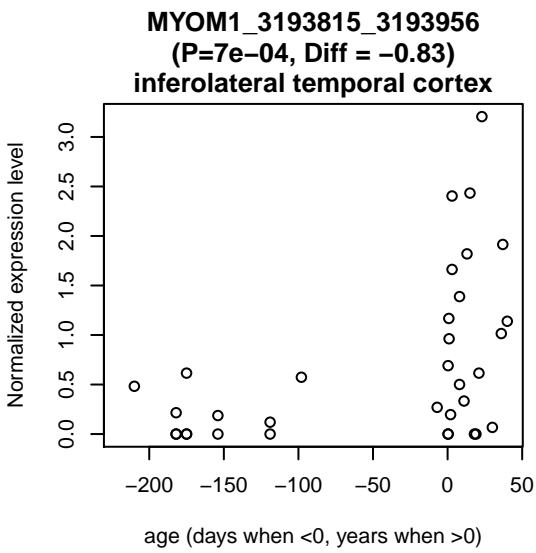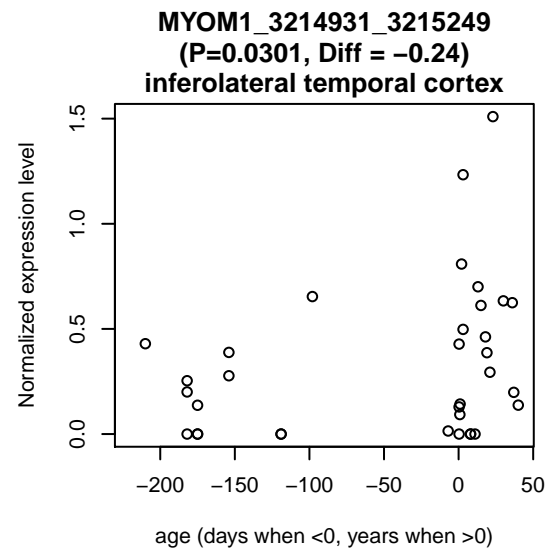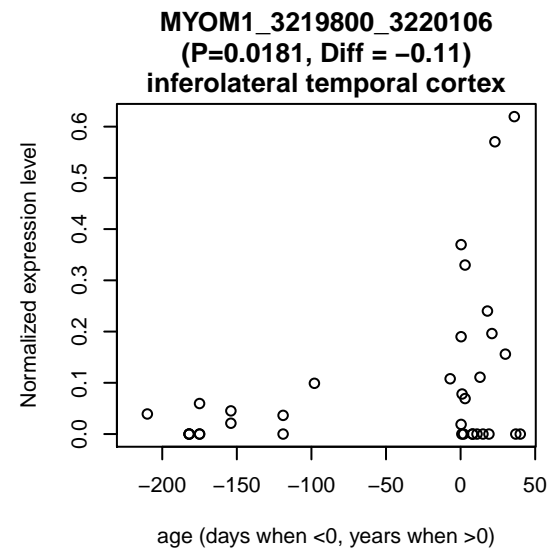

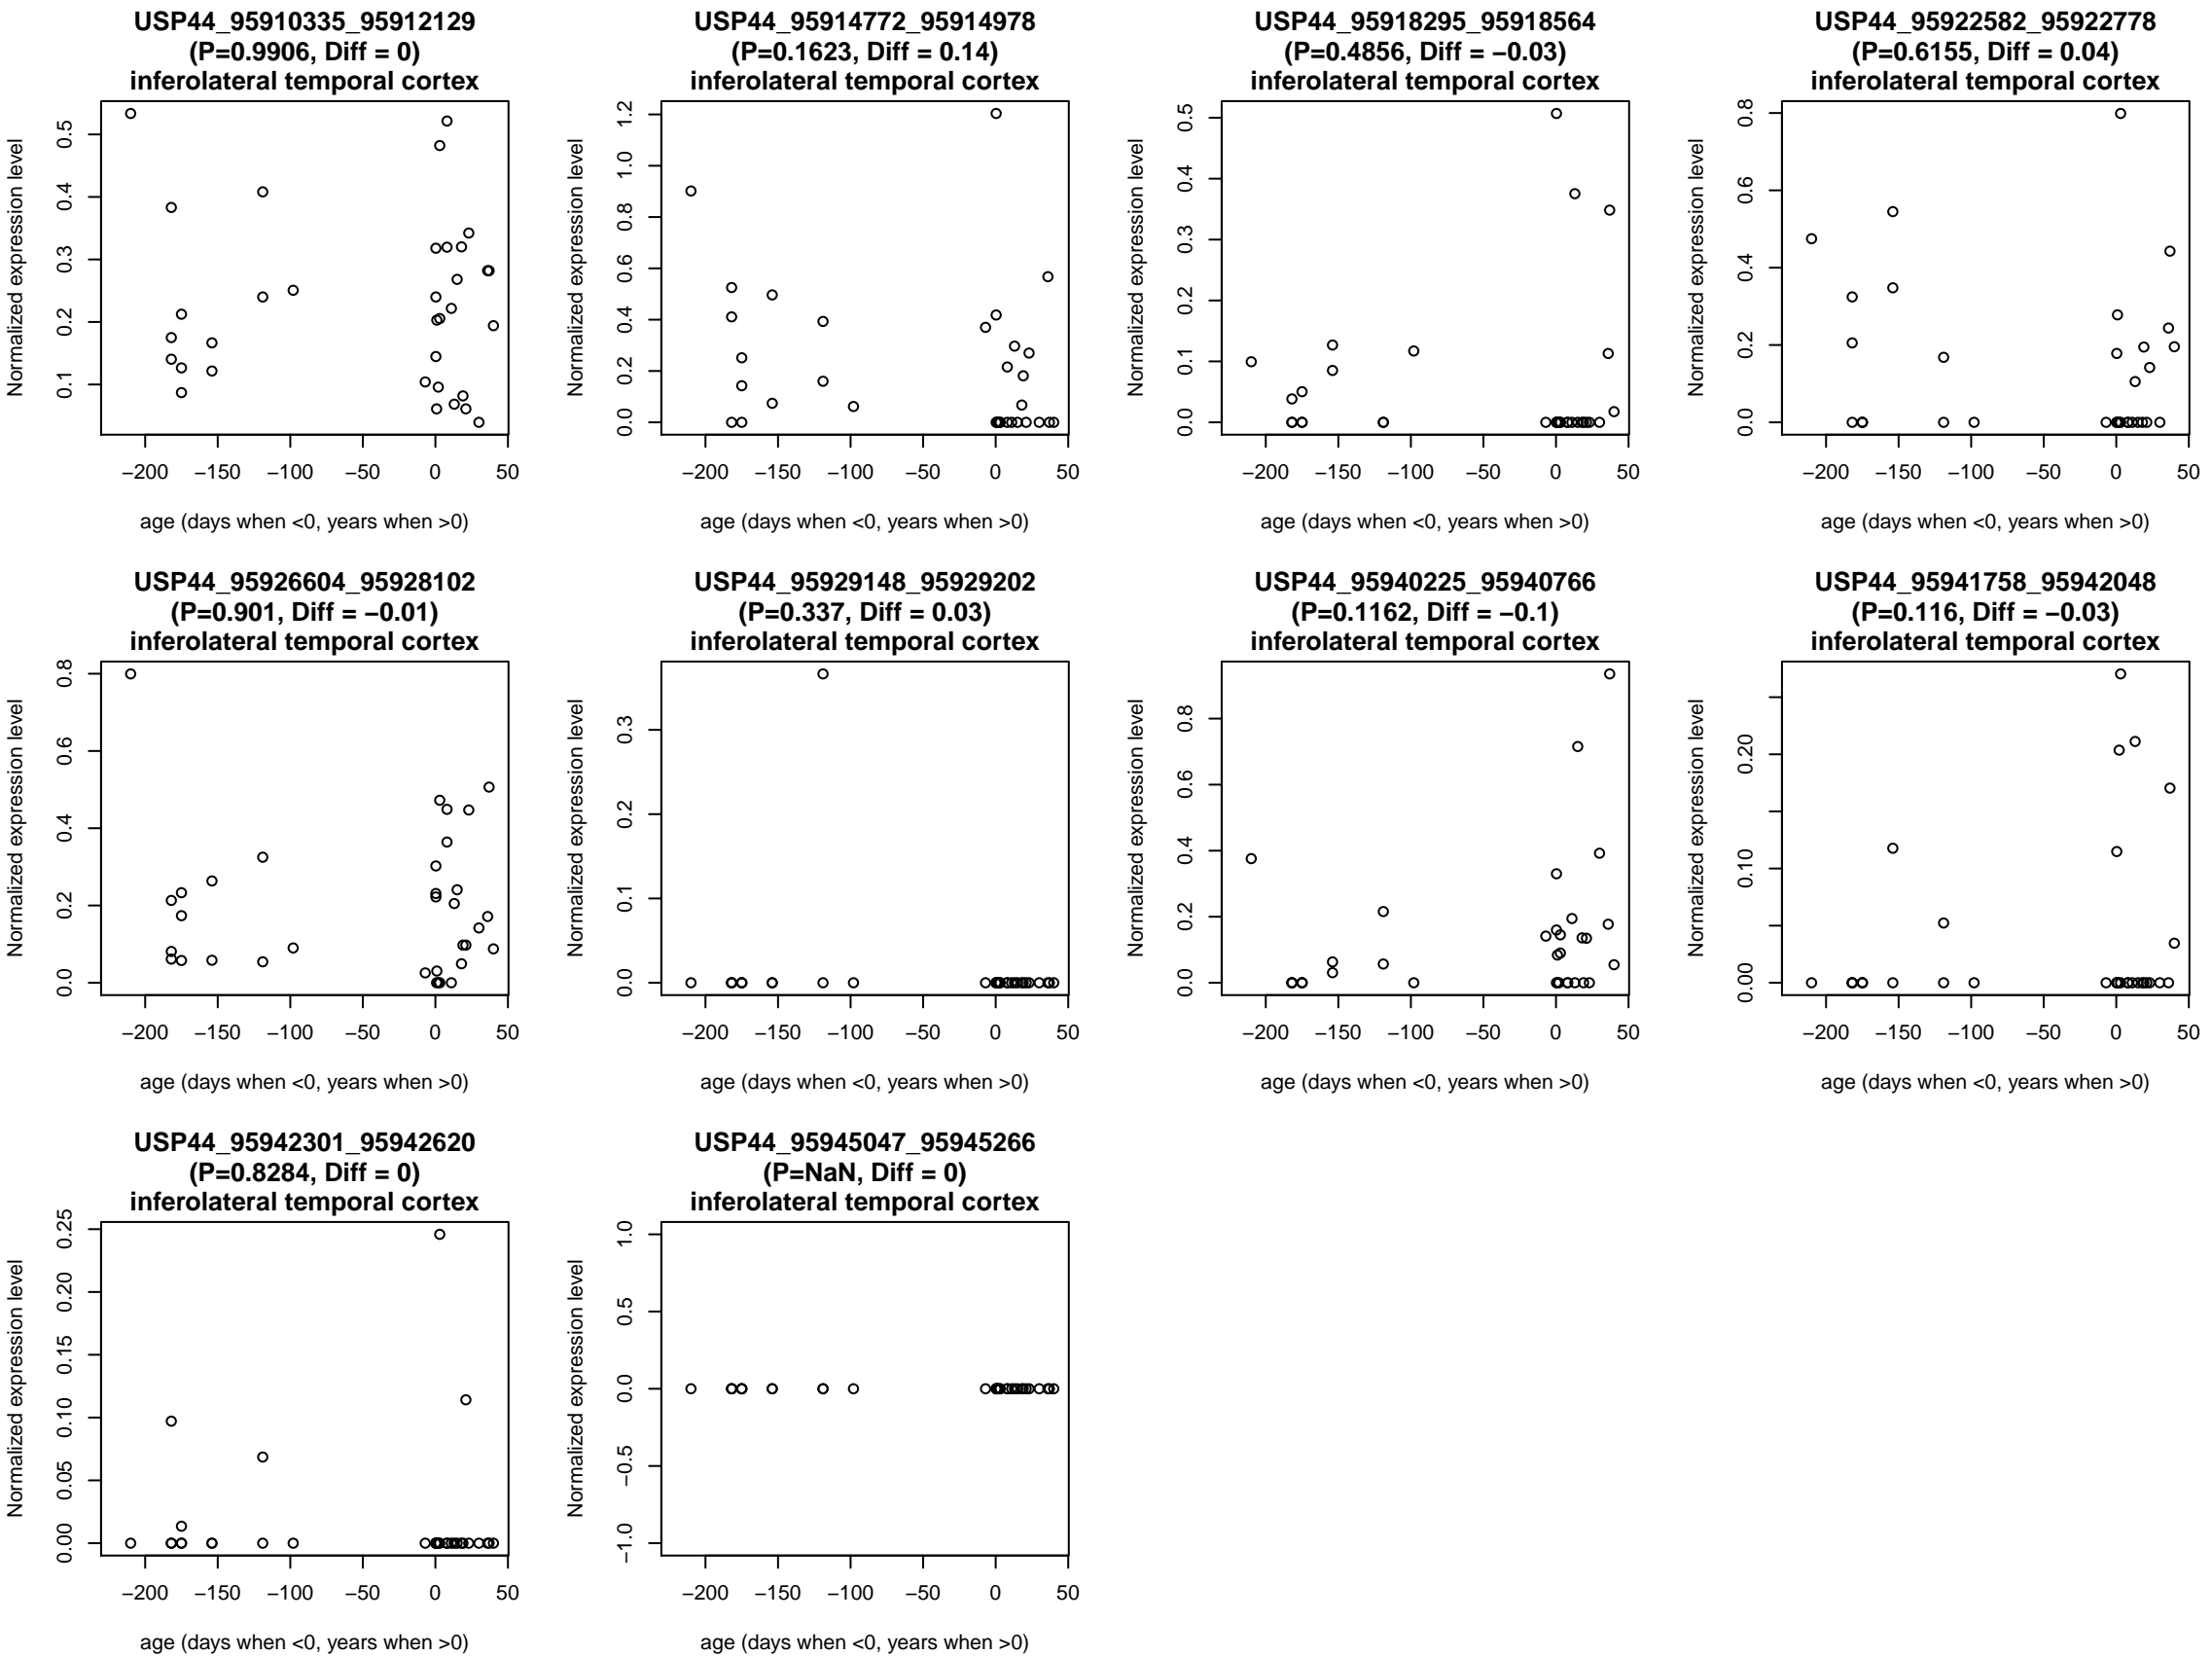

**IGFBP7\_57896938\_57897502**  
(P=0.0022, Diff = -28.95)  
inferolateral temporal cortex

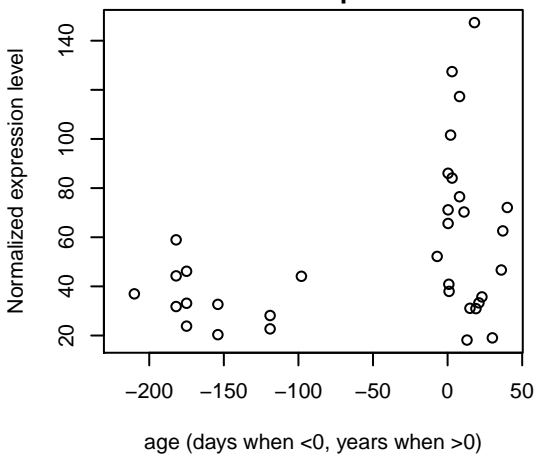

**IGFBP7\_57898203\_57898718**  
(P=9e-04, Diff = -31.53)  
inferolateral temporal cortex

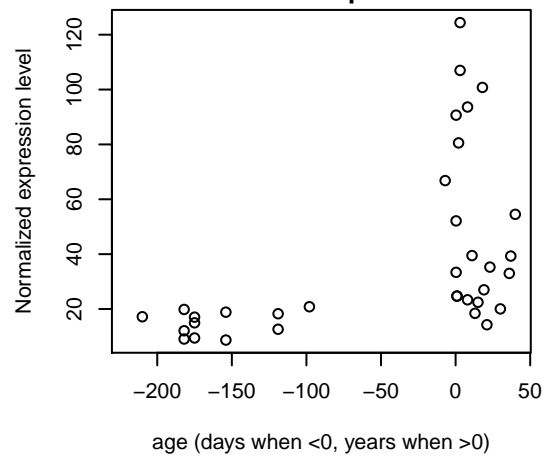

**IGFBP7\_57899360\_57899477**  
(P=0.0195, Diff = -91.93)  
inferolateral temporal cortex

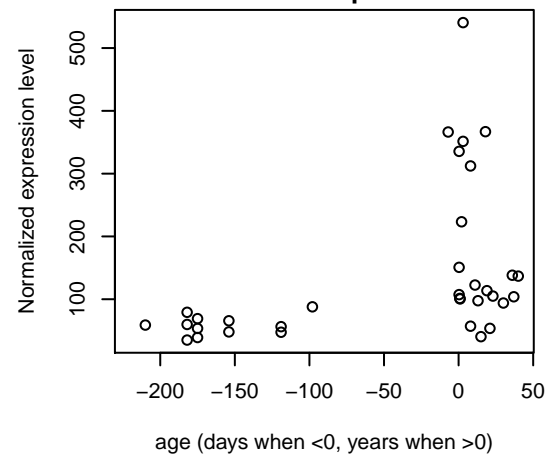

**IGFBP7\_57906989\_57907099**  
(P=0.0192, Diff = -90.36)  
inferolateral temporal cortex

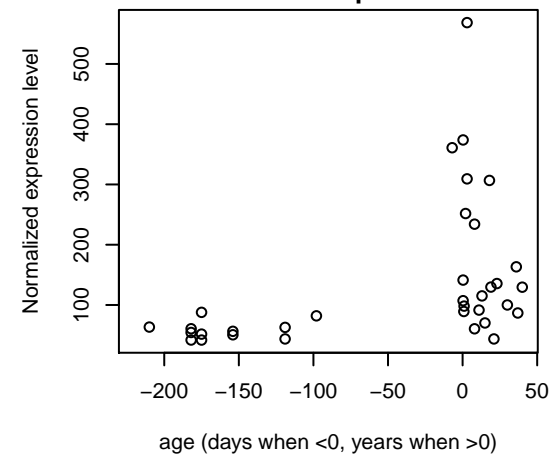

**IGFBP7\_57976042\_57976551**  
(P=0.362, Diff = -12.39)  
inferolateral temporal cortex

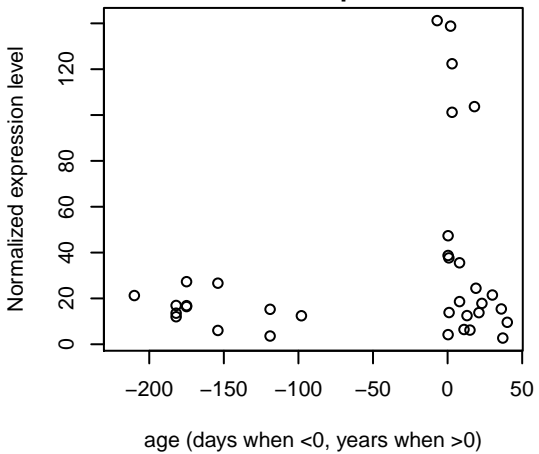

**OPA1\_193310932\_193311198**  
(P=0.01, Diff = 2.15)  
inferolateral temporal cortex

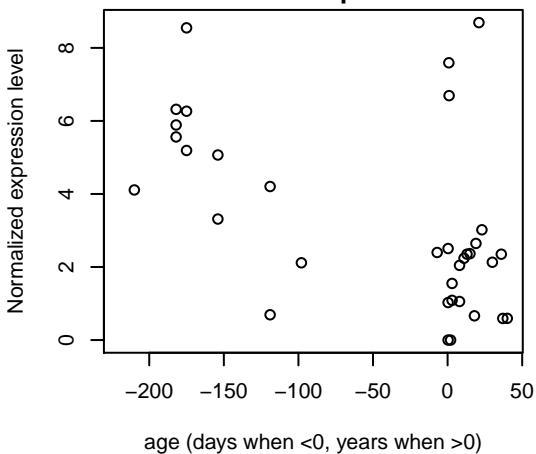

**OPA1\_193321288\_193321346**  
(P=0.9884, Diff = 0)  
inferolateral temporal cortex

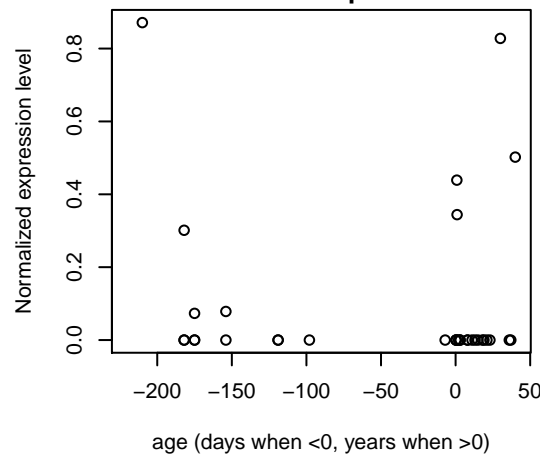

**OPA1\_19332511\_19332830**  
(P=0.6345, Diff = -1.53)  
inferolateral temporal cortex

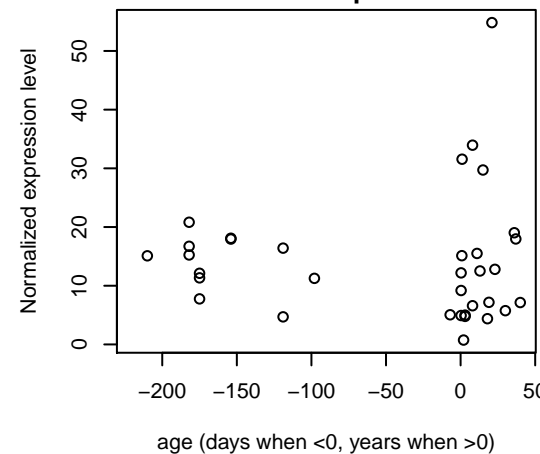

**OPA1\_193333462\_193333559**  
(P=0.4951, Diff = -2.35)  
inferolateral temporal cortex

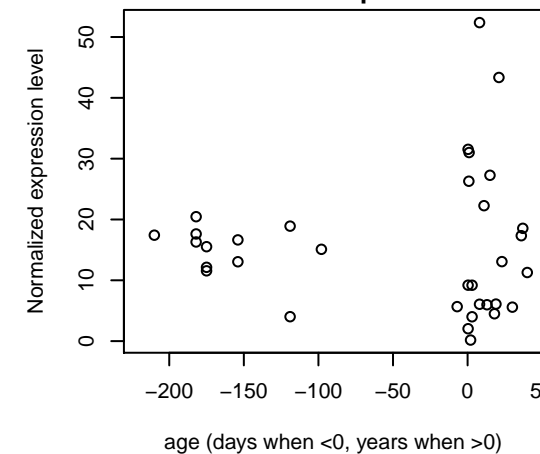

**OPA1\_193334966\_193335074**  
(P=0.863, Diff = -0.63)  
inferolateral temporal cortex

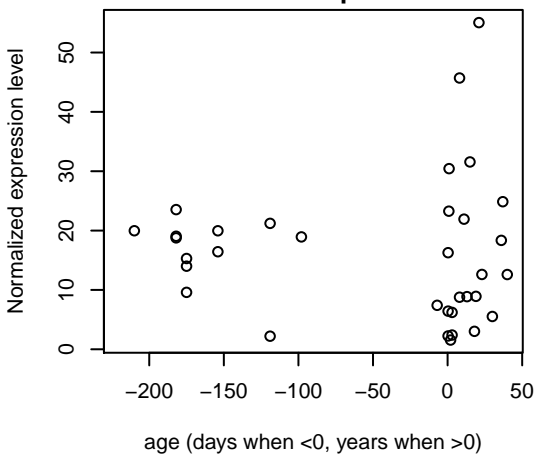

**OPA1\_193335572\_193335626**  
(P=0.437, Diff = -0.4)  
inferolateral temporal cortex

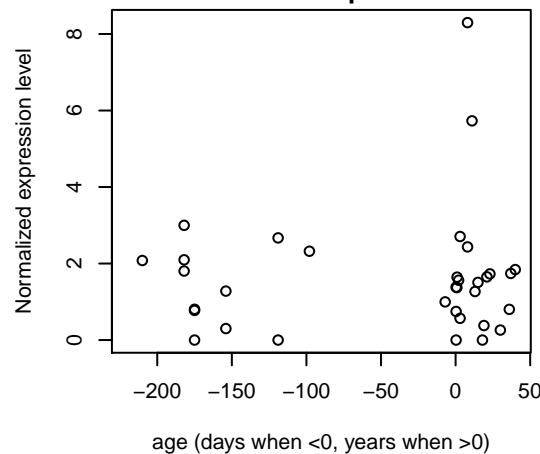

**OPA1\_193336615\_193336726**  
(P=0.9181, Diff = -0.22)  
inferolateral temporal cortex

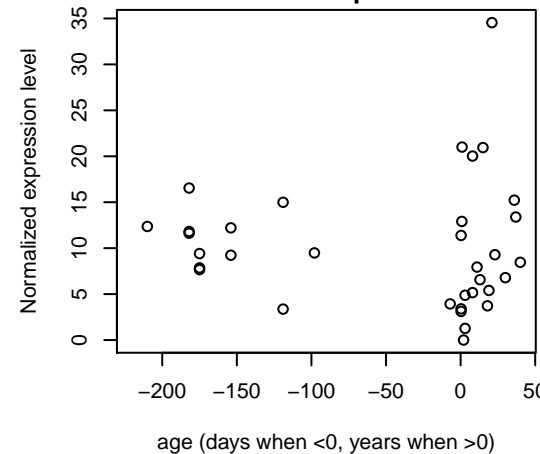

**OPA1\_193343846\_193343991**  
(P=0.2687, Diff = 0.58)  
inferolateral temporal cortex

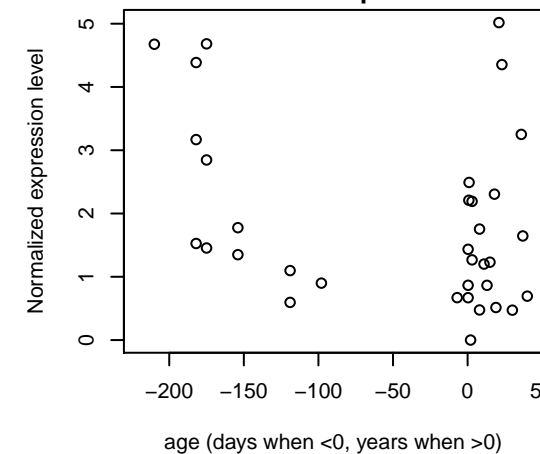

**OPA1\_193346297\_193346333**  
(P=0.1886, Diff = 0.03)  
inferolateral temporal cortex

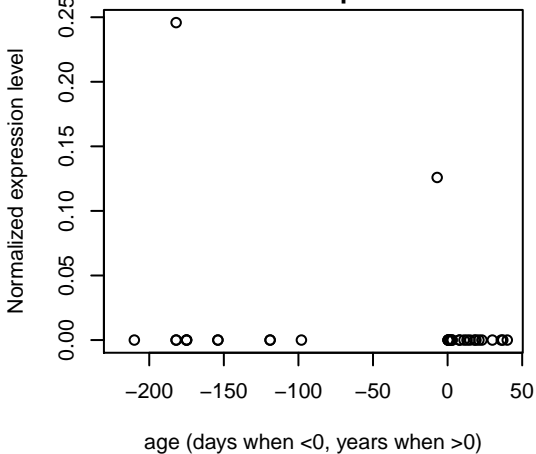

**OPA1\_193349400\_193349454**  
(P=0.7195, Diff = -1.11)  
inferolateral temporal cortex

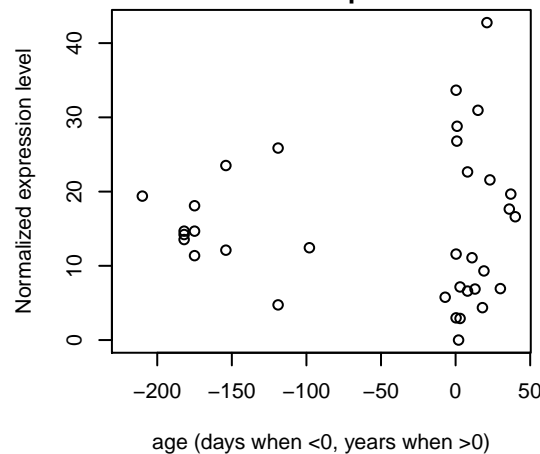

**OPA1\_193353206\_193353311**  
(P=0.6069, Diff = -1.54)  
inferolateral temporal cortex

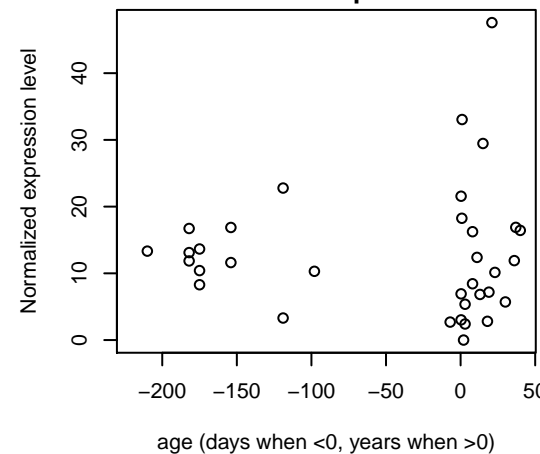

**OPA1\_193354983\_193355070**  
(P=0.8568, Diff = -0.66)  
inferolateral temporal cortex

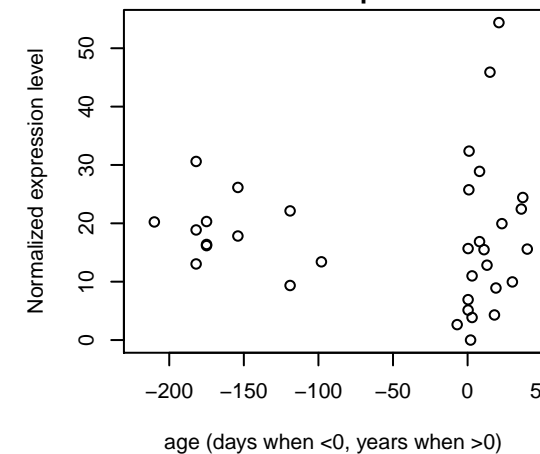

**OPA1\_193355740\_193355854**  
(P=0.3949, Diff = 3.27)  
inferolateral temporal cortex

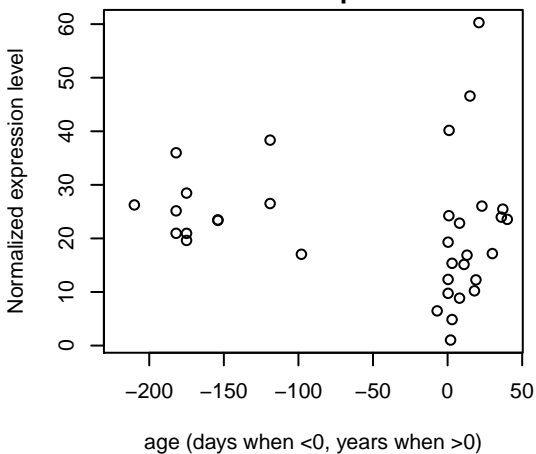

**OPA1\_193360553\_193360634**  
(P=0.9393, Diff = 0.27)  
inferolateral temporal cortex

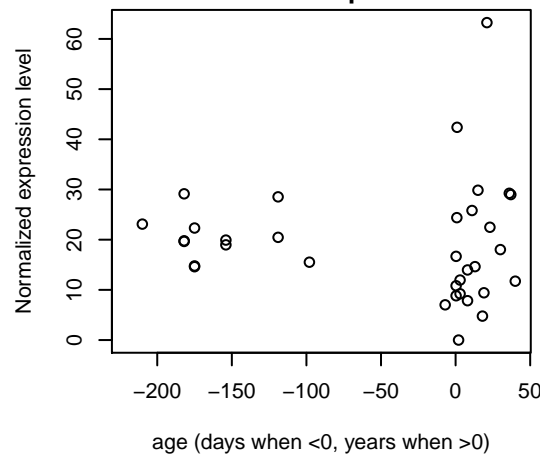

**OPA1\_193360763\_193360838**  
(P=0.7699, Diff = -1.02)  
inferolateral temporal cortex

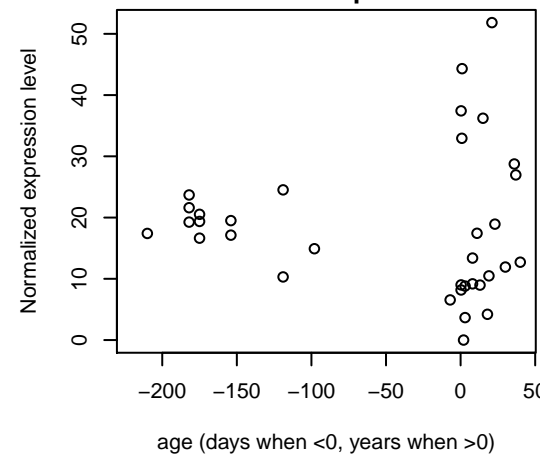

**OPA1\_193361161\_193361233**  
(P=0.8545, Diff = -0.65)  
inferolateral temporal cortex

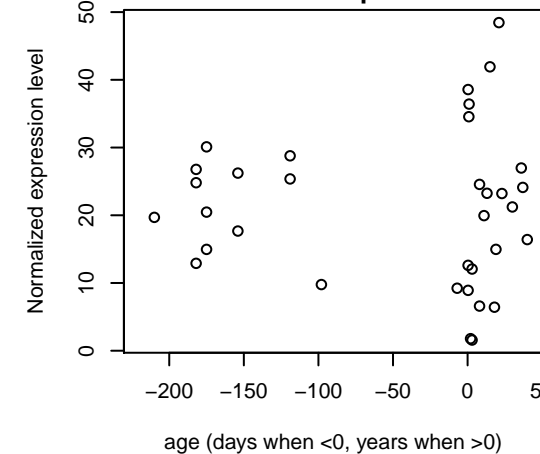



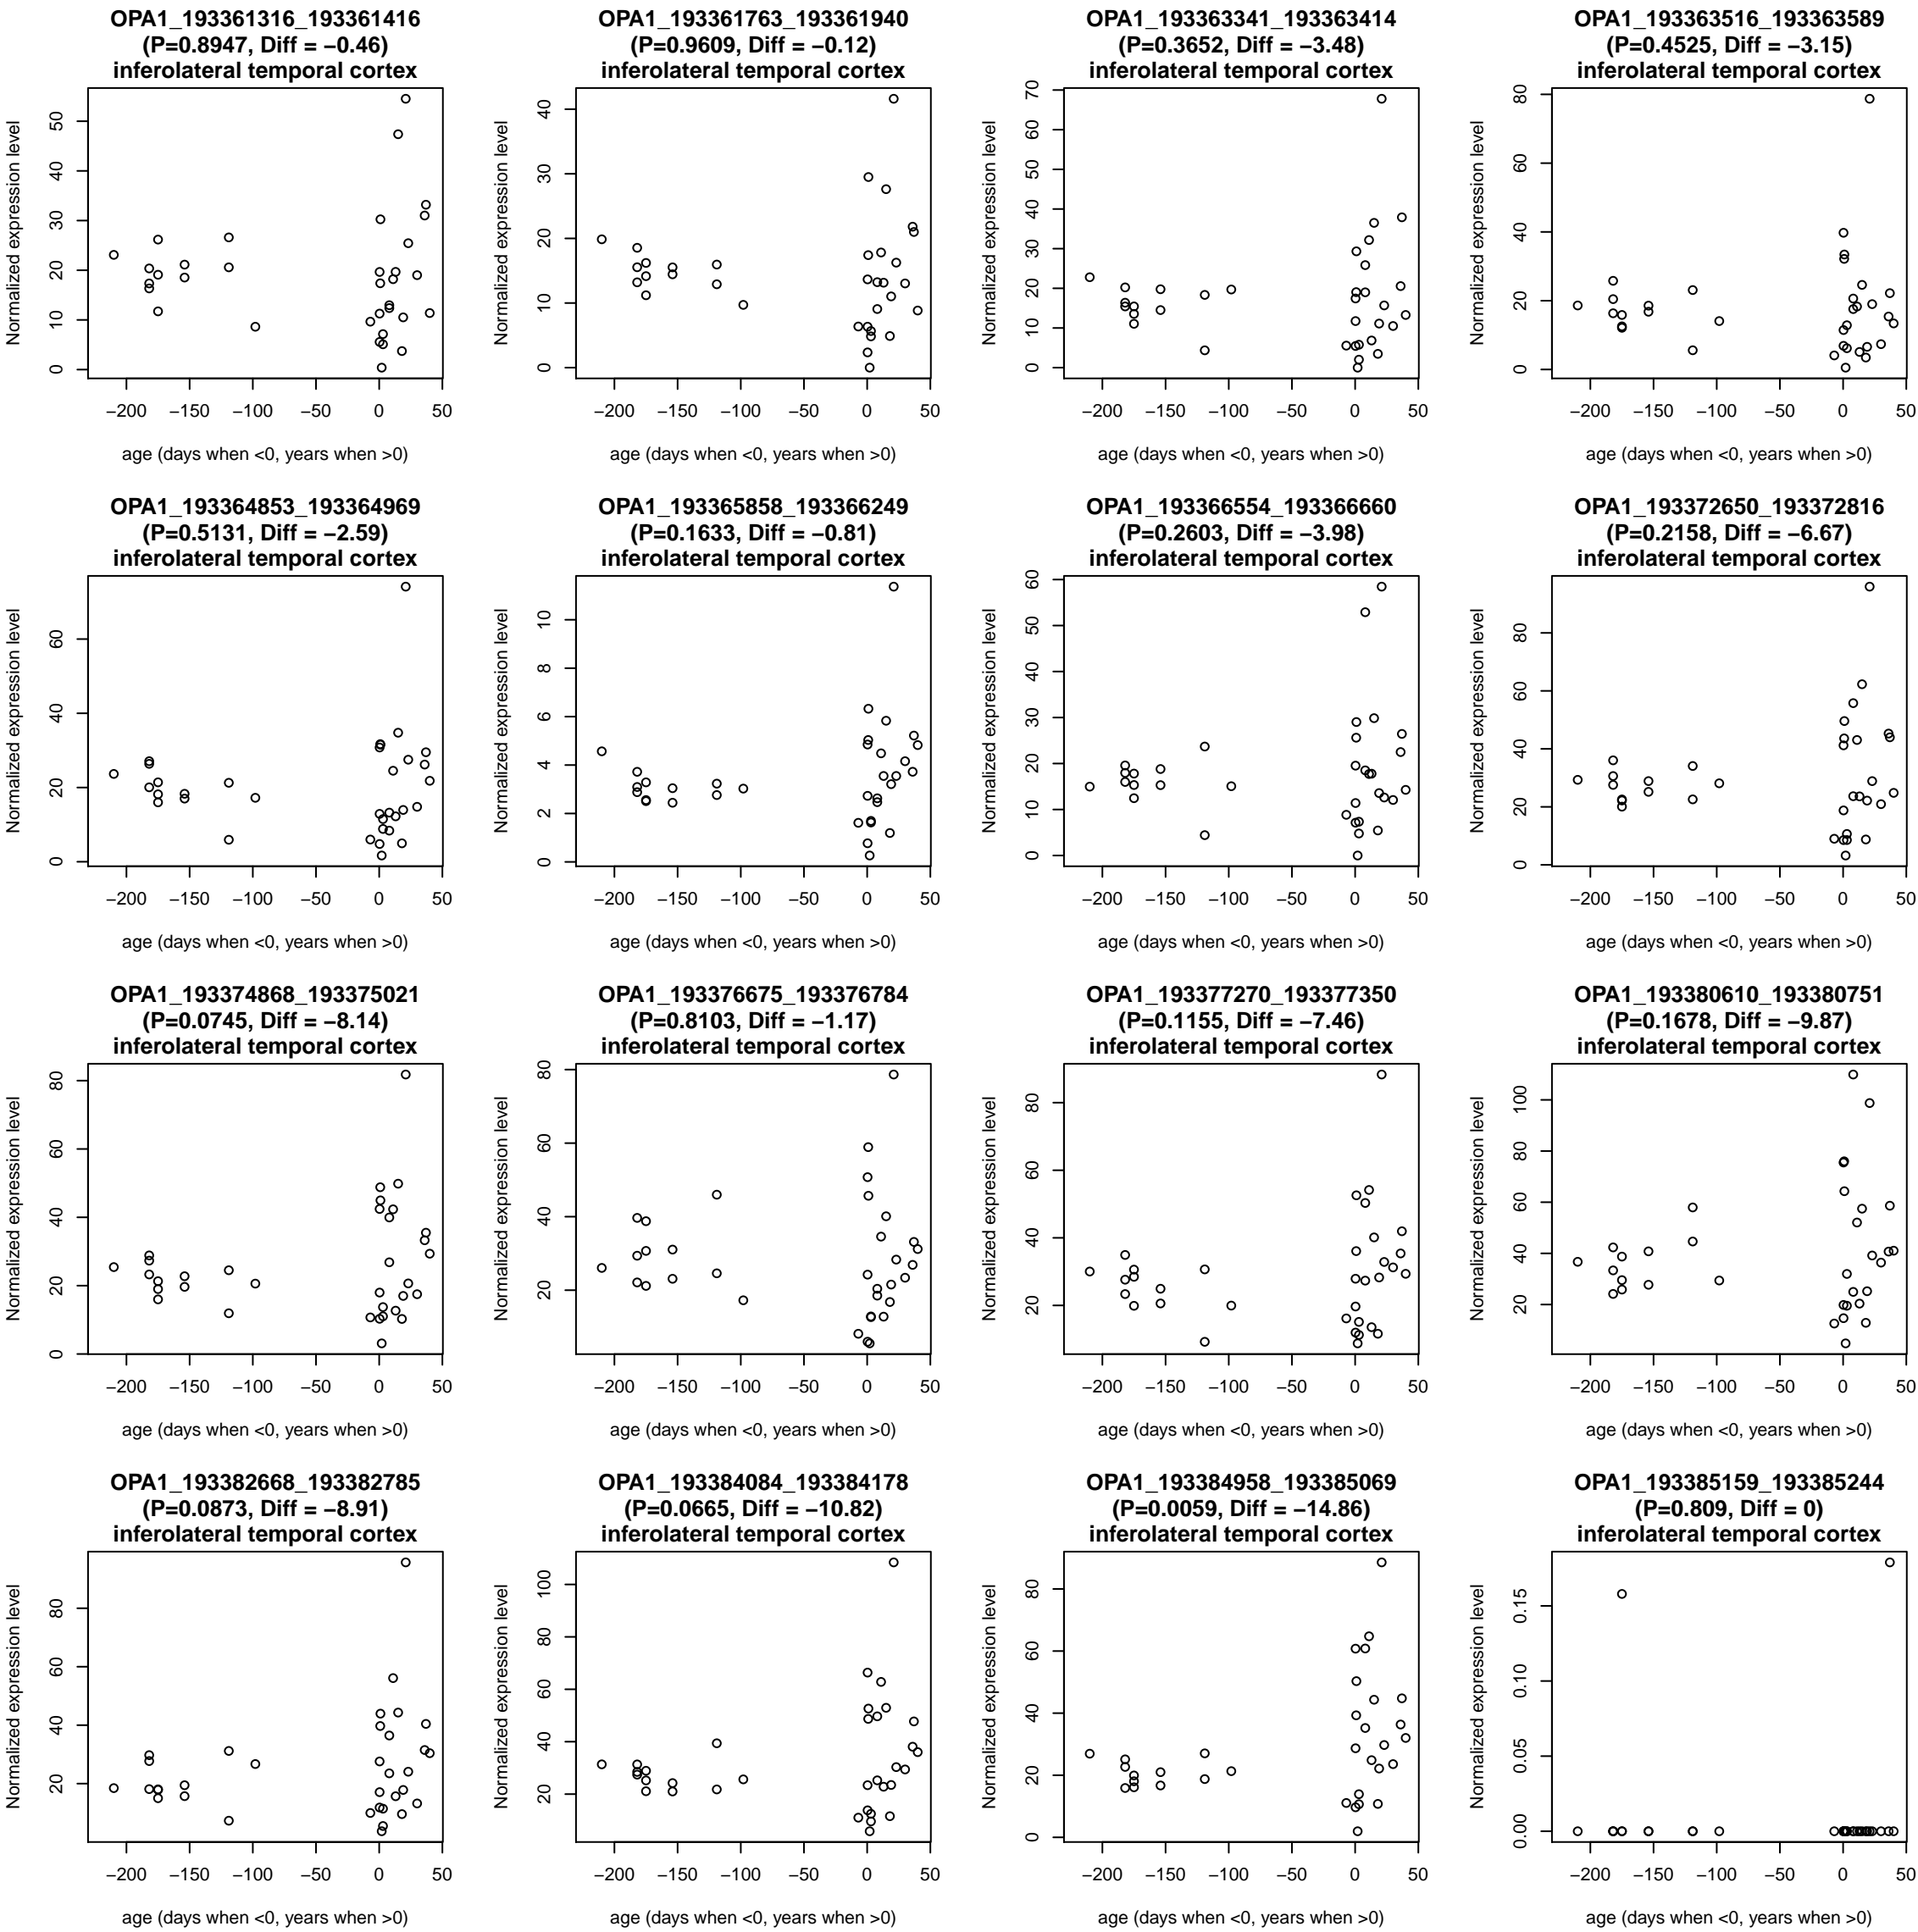

**OPA1\_193386103\_193386720**  
(P=0.751, Diff = -0.02)  
inferolateral temporal cortex

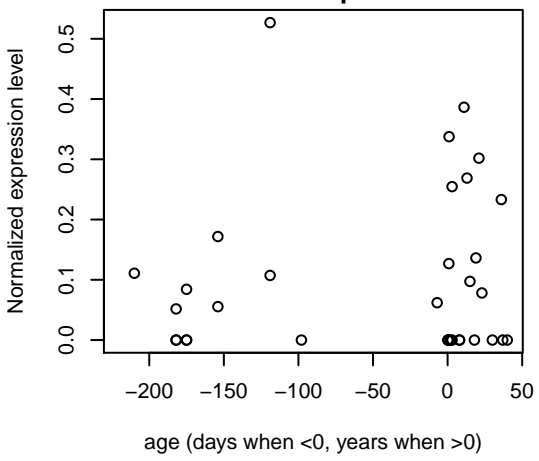

**OPA1\_193409182\_193409921**  
(P=0.0532, Diff = -0.87)  
inferolateral temporal cortex

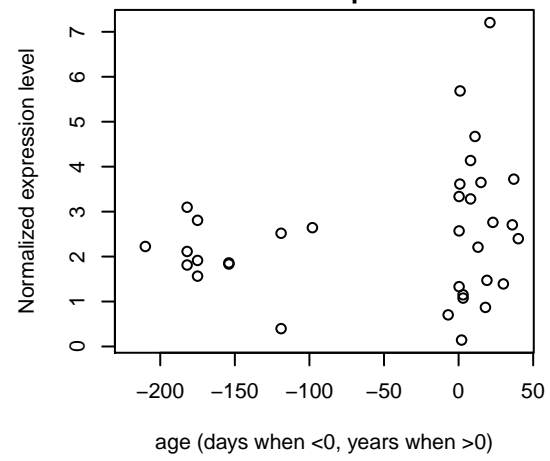

**OPA1\_193412394\_193415612**  
(P=0.0033, Diff = -11.23)  
inferolateral temporal cortex

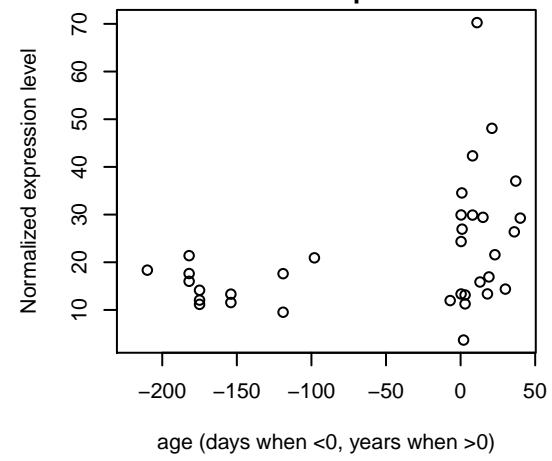

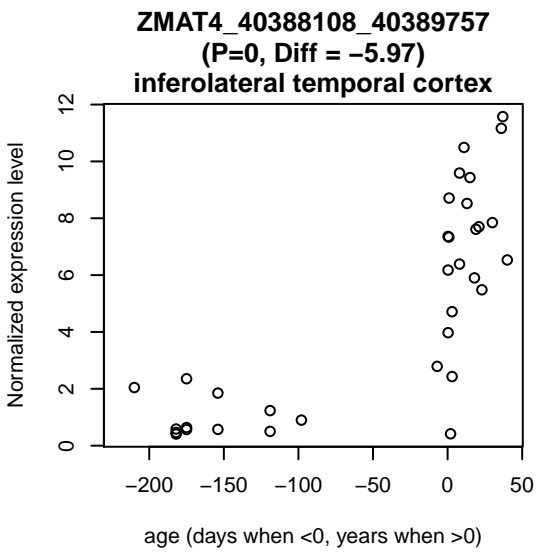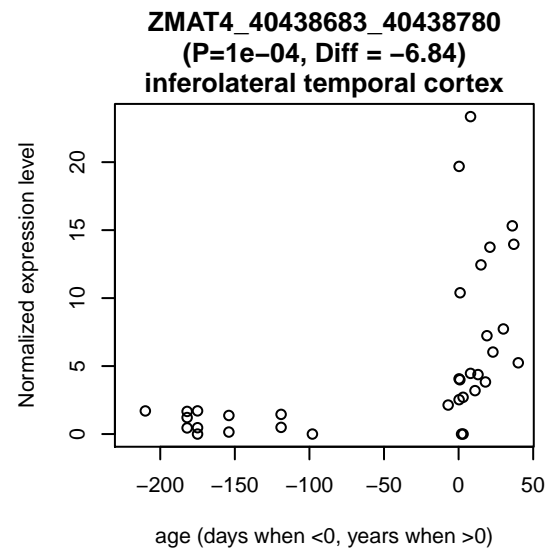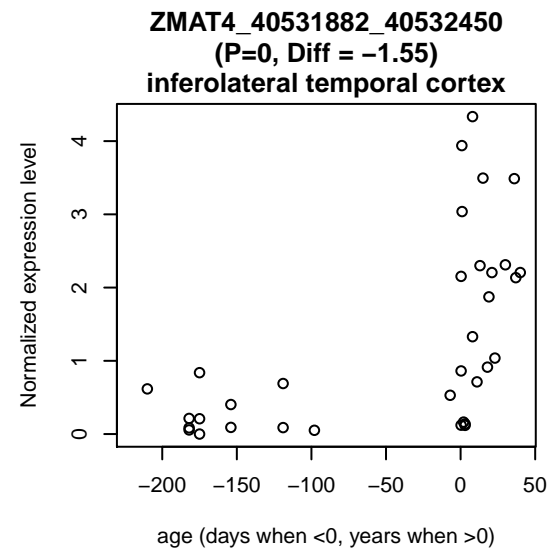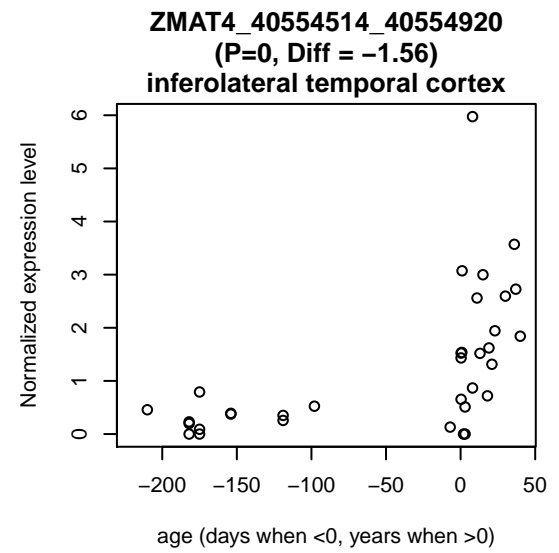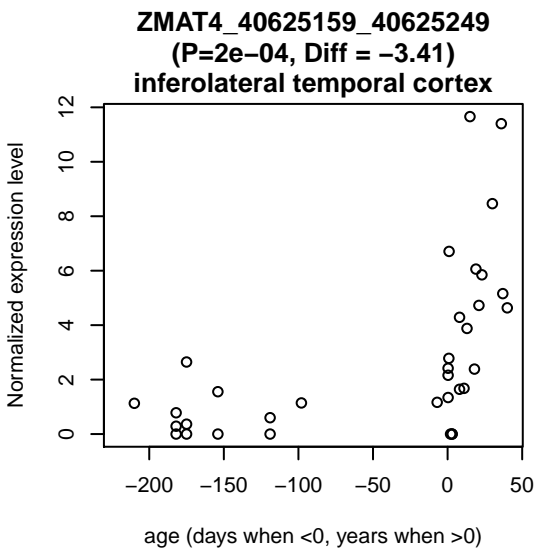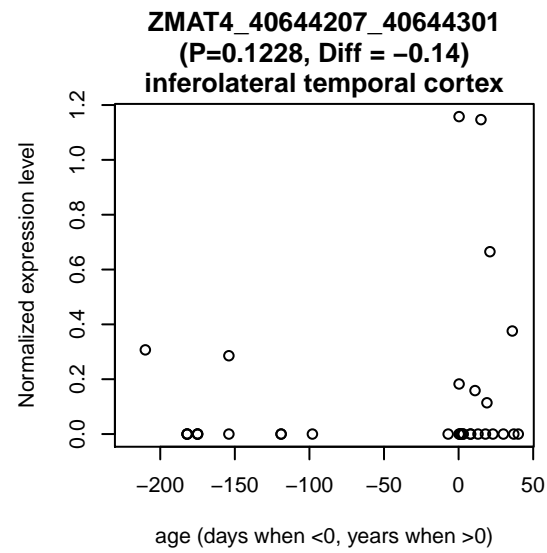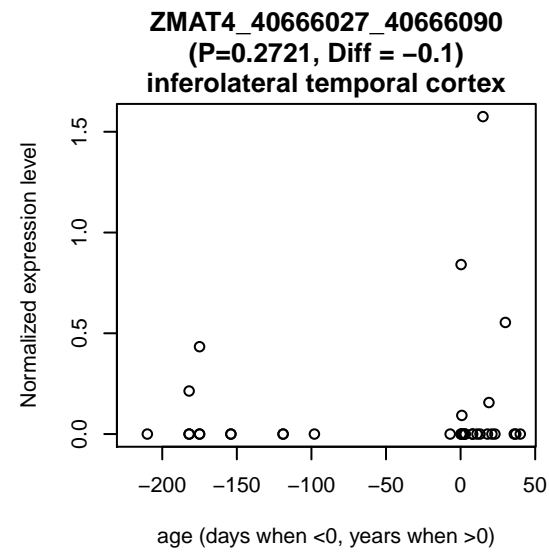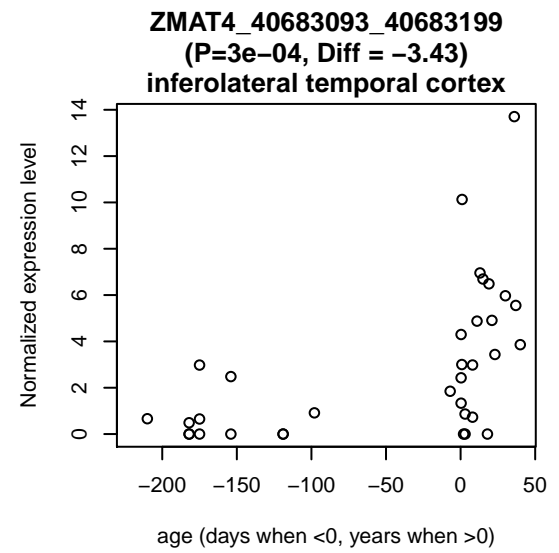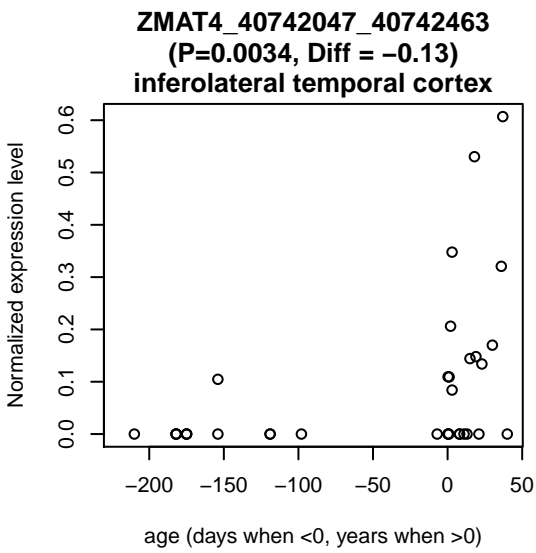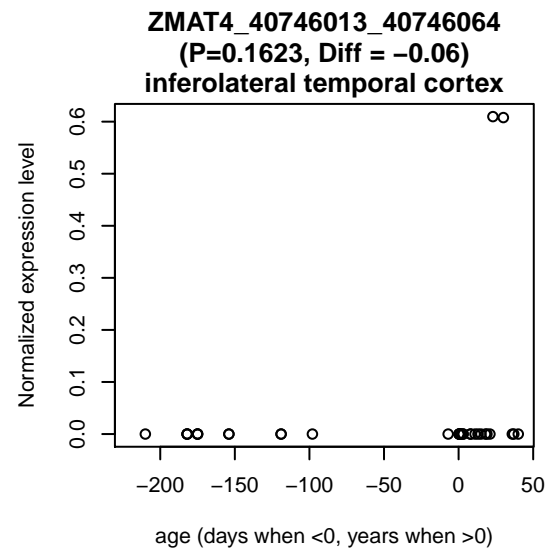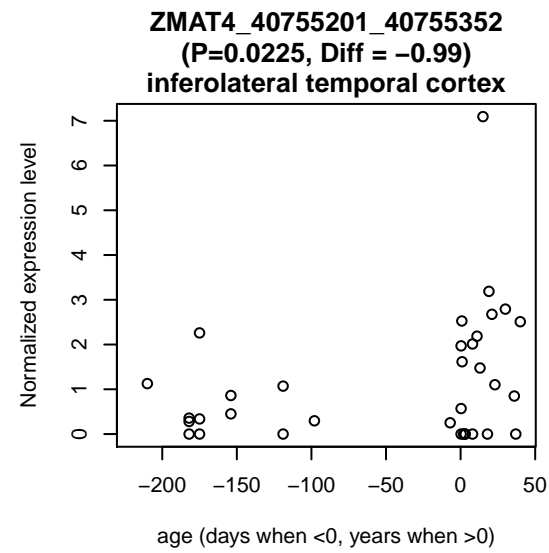

**CNDP1\_72201674\_72201926**  
(P=7e-04, Diff = -4.41)  
inferolateral temporal cortex

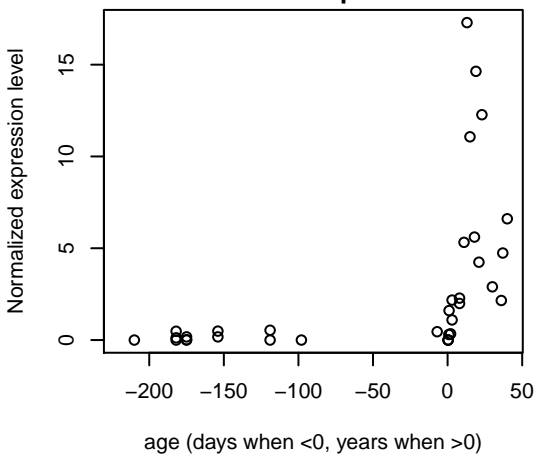

**CNDP1\_72223572\_72223701**  
(P=8e-04, Diff = -10.29)  
inferolateral temporal cortex

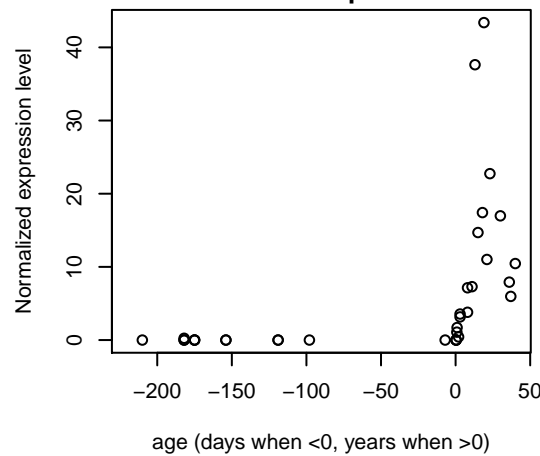

**CNDP1\_72226557\_72226707**  
(P=8e-04, Diff = -10.65)  
inferolateral temporal cortex

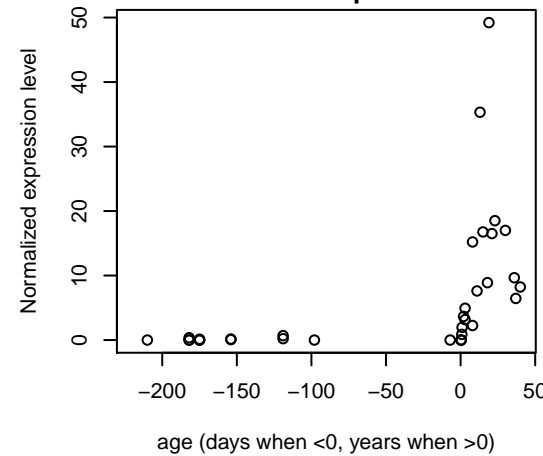

**CNDP1\_72228090\_72228253**  
(P=5e-04, Diff = -14.15)  
inferolateral temporal cortex

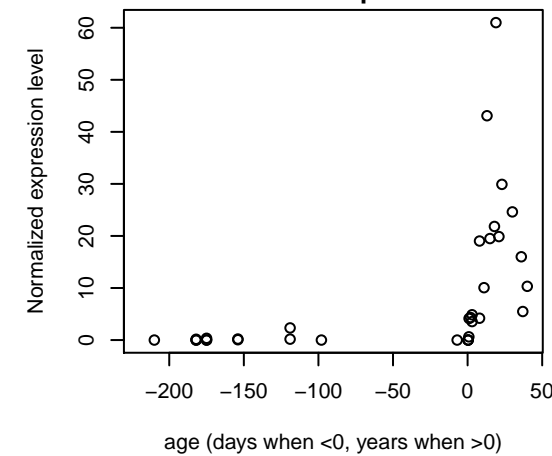

**CNDP1\_72229281\_72229370**  
(P=1e-04, Diff = -21.83)  
inferolateral temporal cortex

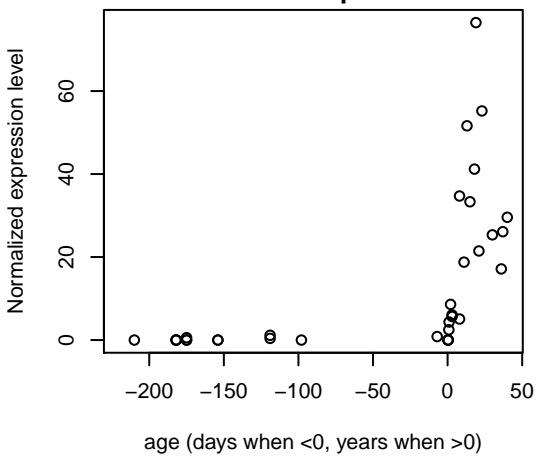

**CNDP1\_72234467\_72234668**  
(P=0, Diff = -23.45)  
inferolateral temporal cortex

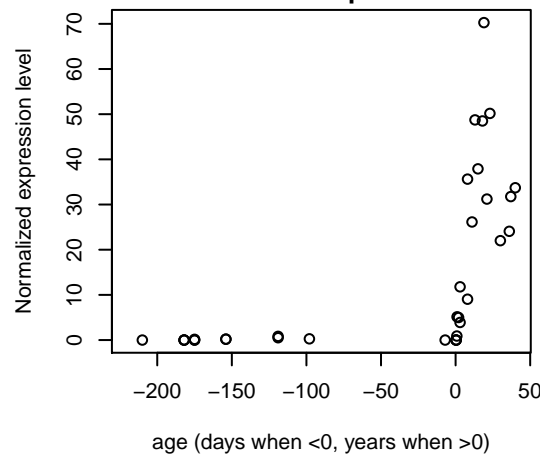

**CNDP1\_72238420\_72238505**  
(P=0, Diff = -24.18)  
inferolateral temporal cortex

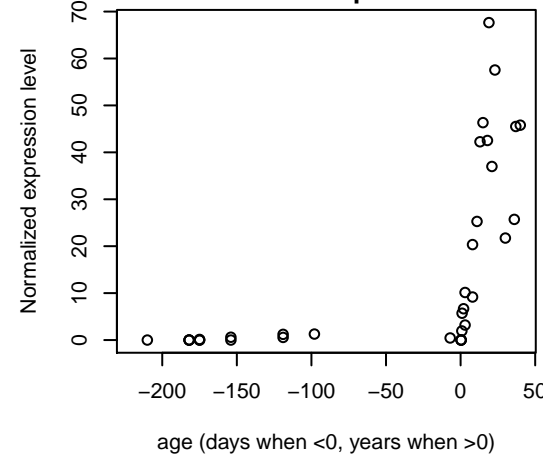

**CNDP1\_72244103\_72244264**  
(P=0, Diff = -18.49)  
inferolateral temporal cortex

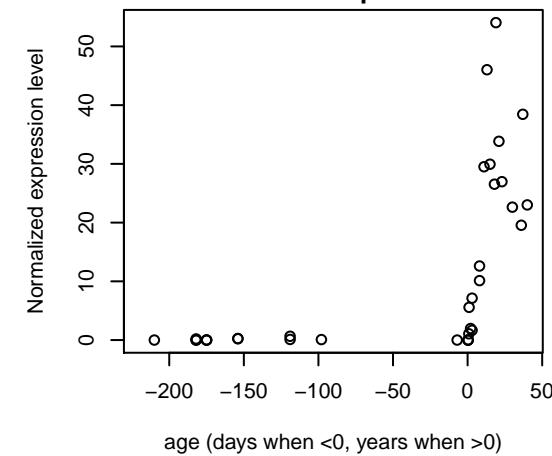

**CNDP1\_72245397\_72245562**  
(P=1e-04, Diff = -23.36)  
inferolateral temporal cortex

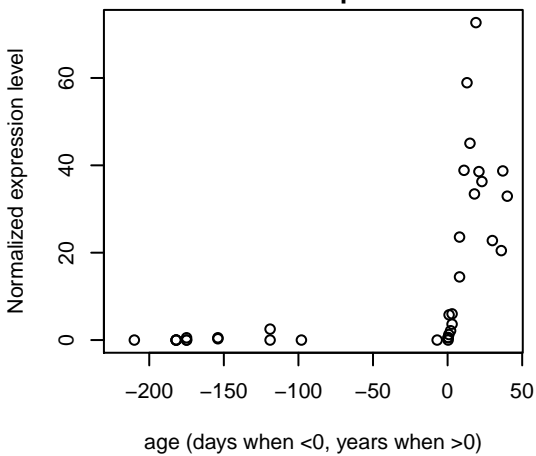

**CNDP1\_72247365\_72247507**  
(P=0, Diff = -32.7)  
inferolateral temporal cortex

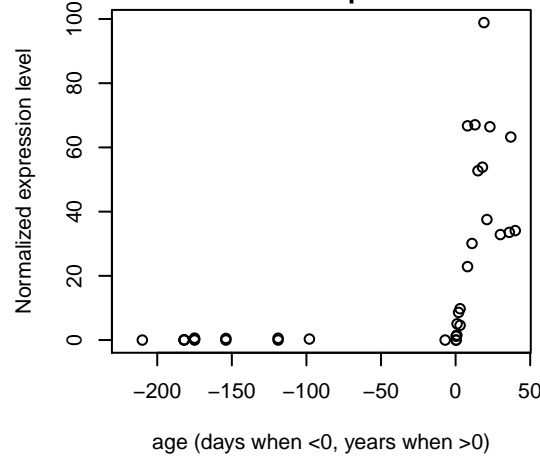

**CNDP1\_72250796\_72250944**  
(P=1e-04, Diff = -27.1)  
inferolateral temporal cortex

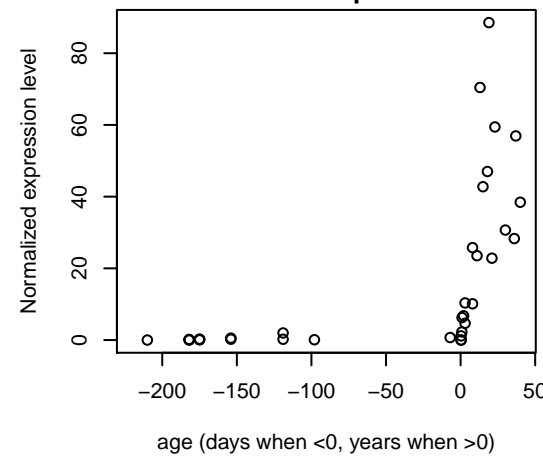

**CNDP1\_72251731\_72252261**  
(P=1e-04, Diff = -19.35)  
inferolateral temporal cortex

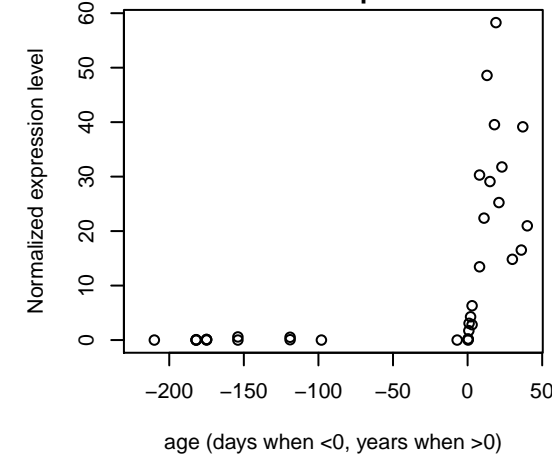

**TOX3\_52471917\_52473880**  
( $P=1e-04$ , Diff = 9.22)  
inferolateral temporal cortex

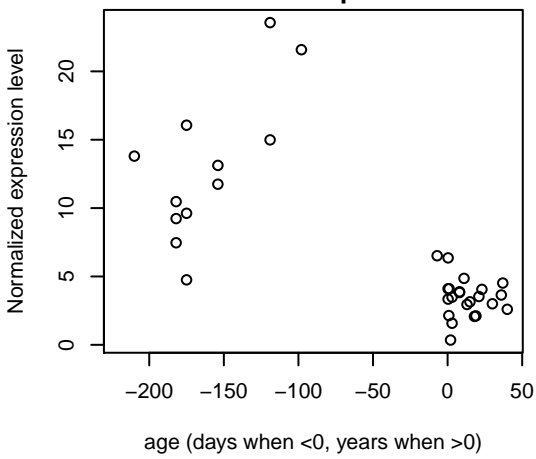

**TOX3\_52478187\_52478268**  
( $P=1e-04$ , Diff = 10.55)  
inferolateral temporal cortex

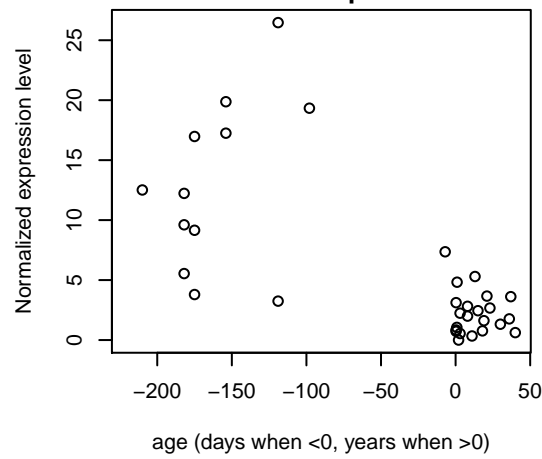

**TOX3\_52479905\_52480133**  
( $P=2e-04$ , Diff = 8.73)  
inferolateral temporal cortex

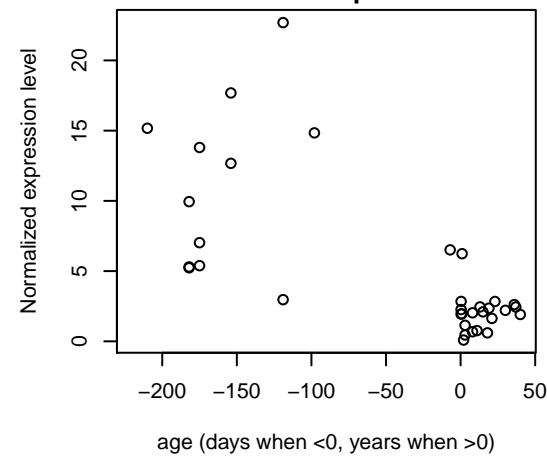

**TOX3\_52484188\_52484458**  
( $P=0$ , Diff = 12.46)  
inferolateral temporal cortex

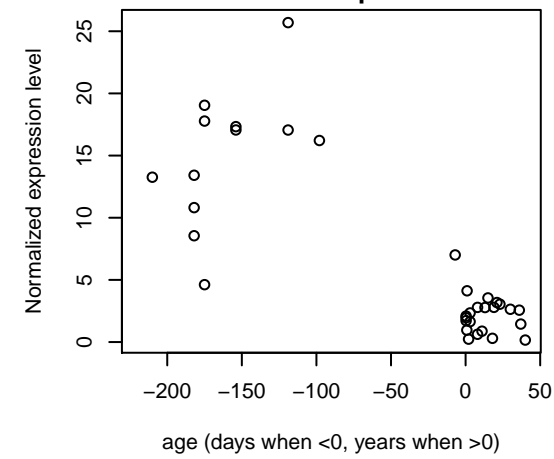

**TOX3\_52497845\_52498100**  
( $P=0$ , Diff = 12.81)  
inferolateral temporal cortex

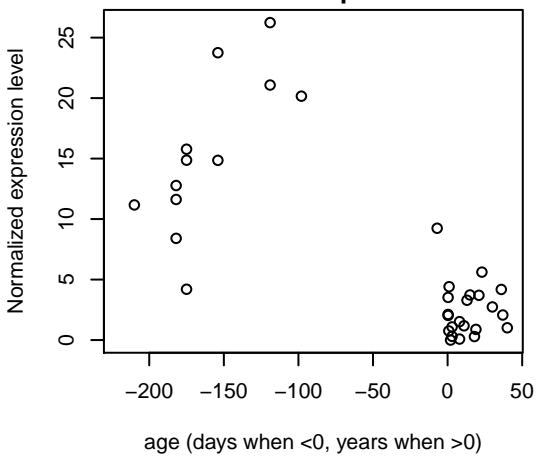

**TOX3\_52502420\_52502486**  
( $P=0$ , Diff = 7.9)  
inferolateral temporal cortex

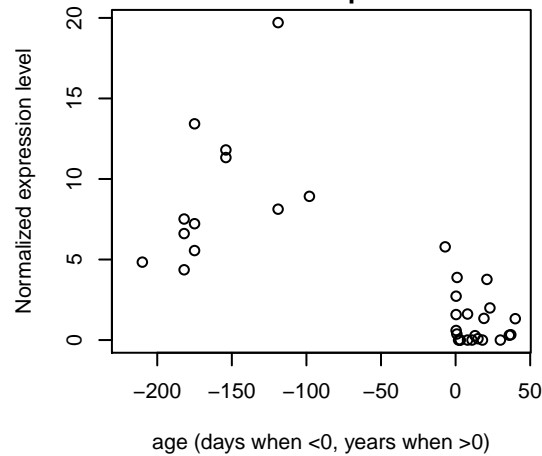

**TOX3\_52553317\_52553491**  
( $P=0.1882$ , Diff = 0.2)  
inferolateral temporal cortex

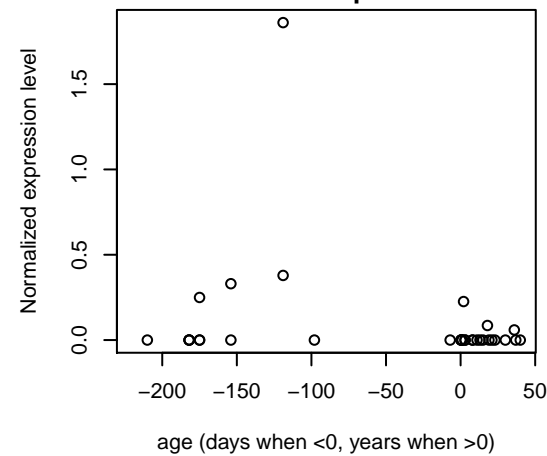

**TOX3\_52580548\_52580806**  
( $P=2e-04$ , Diff = 2.41)  
inferolateral temporal cortex

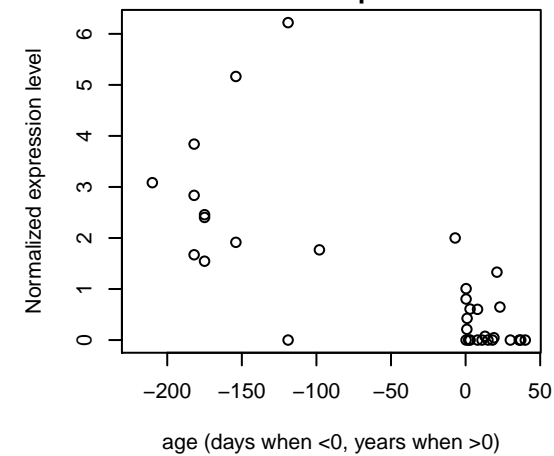

**TOX3\_52581625\_52581714**  
( $P=0.2327$ , Diff = 0.12)  
inferolateral temporal cortex

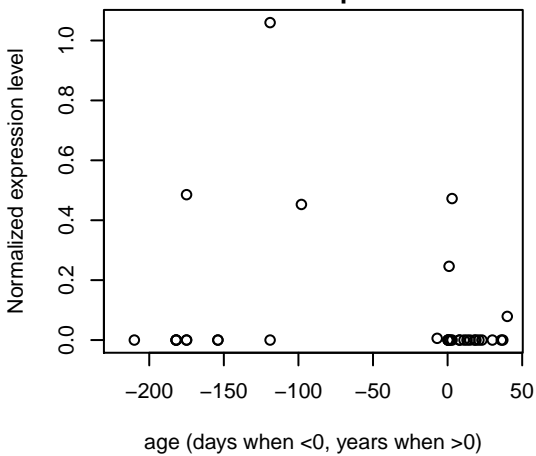

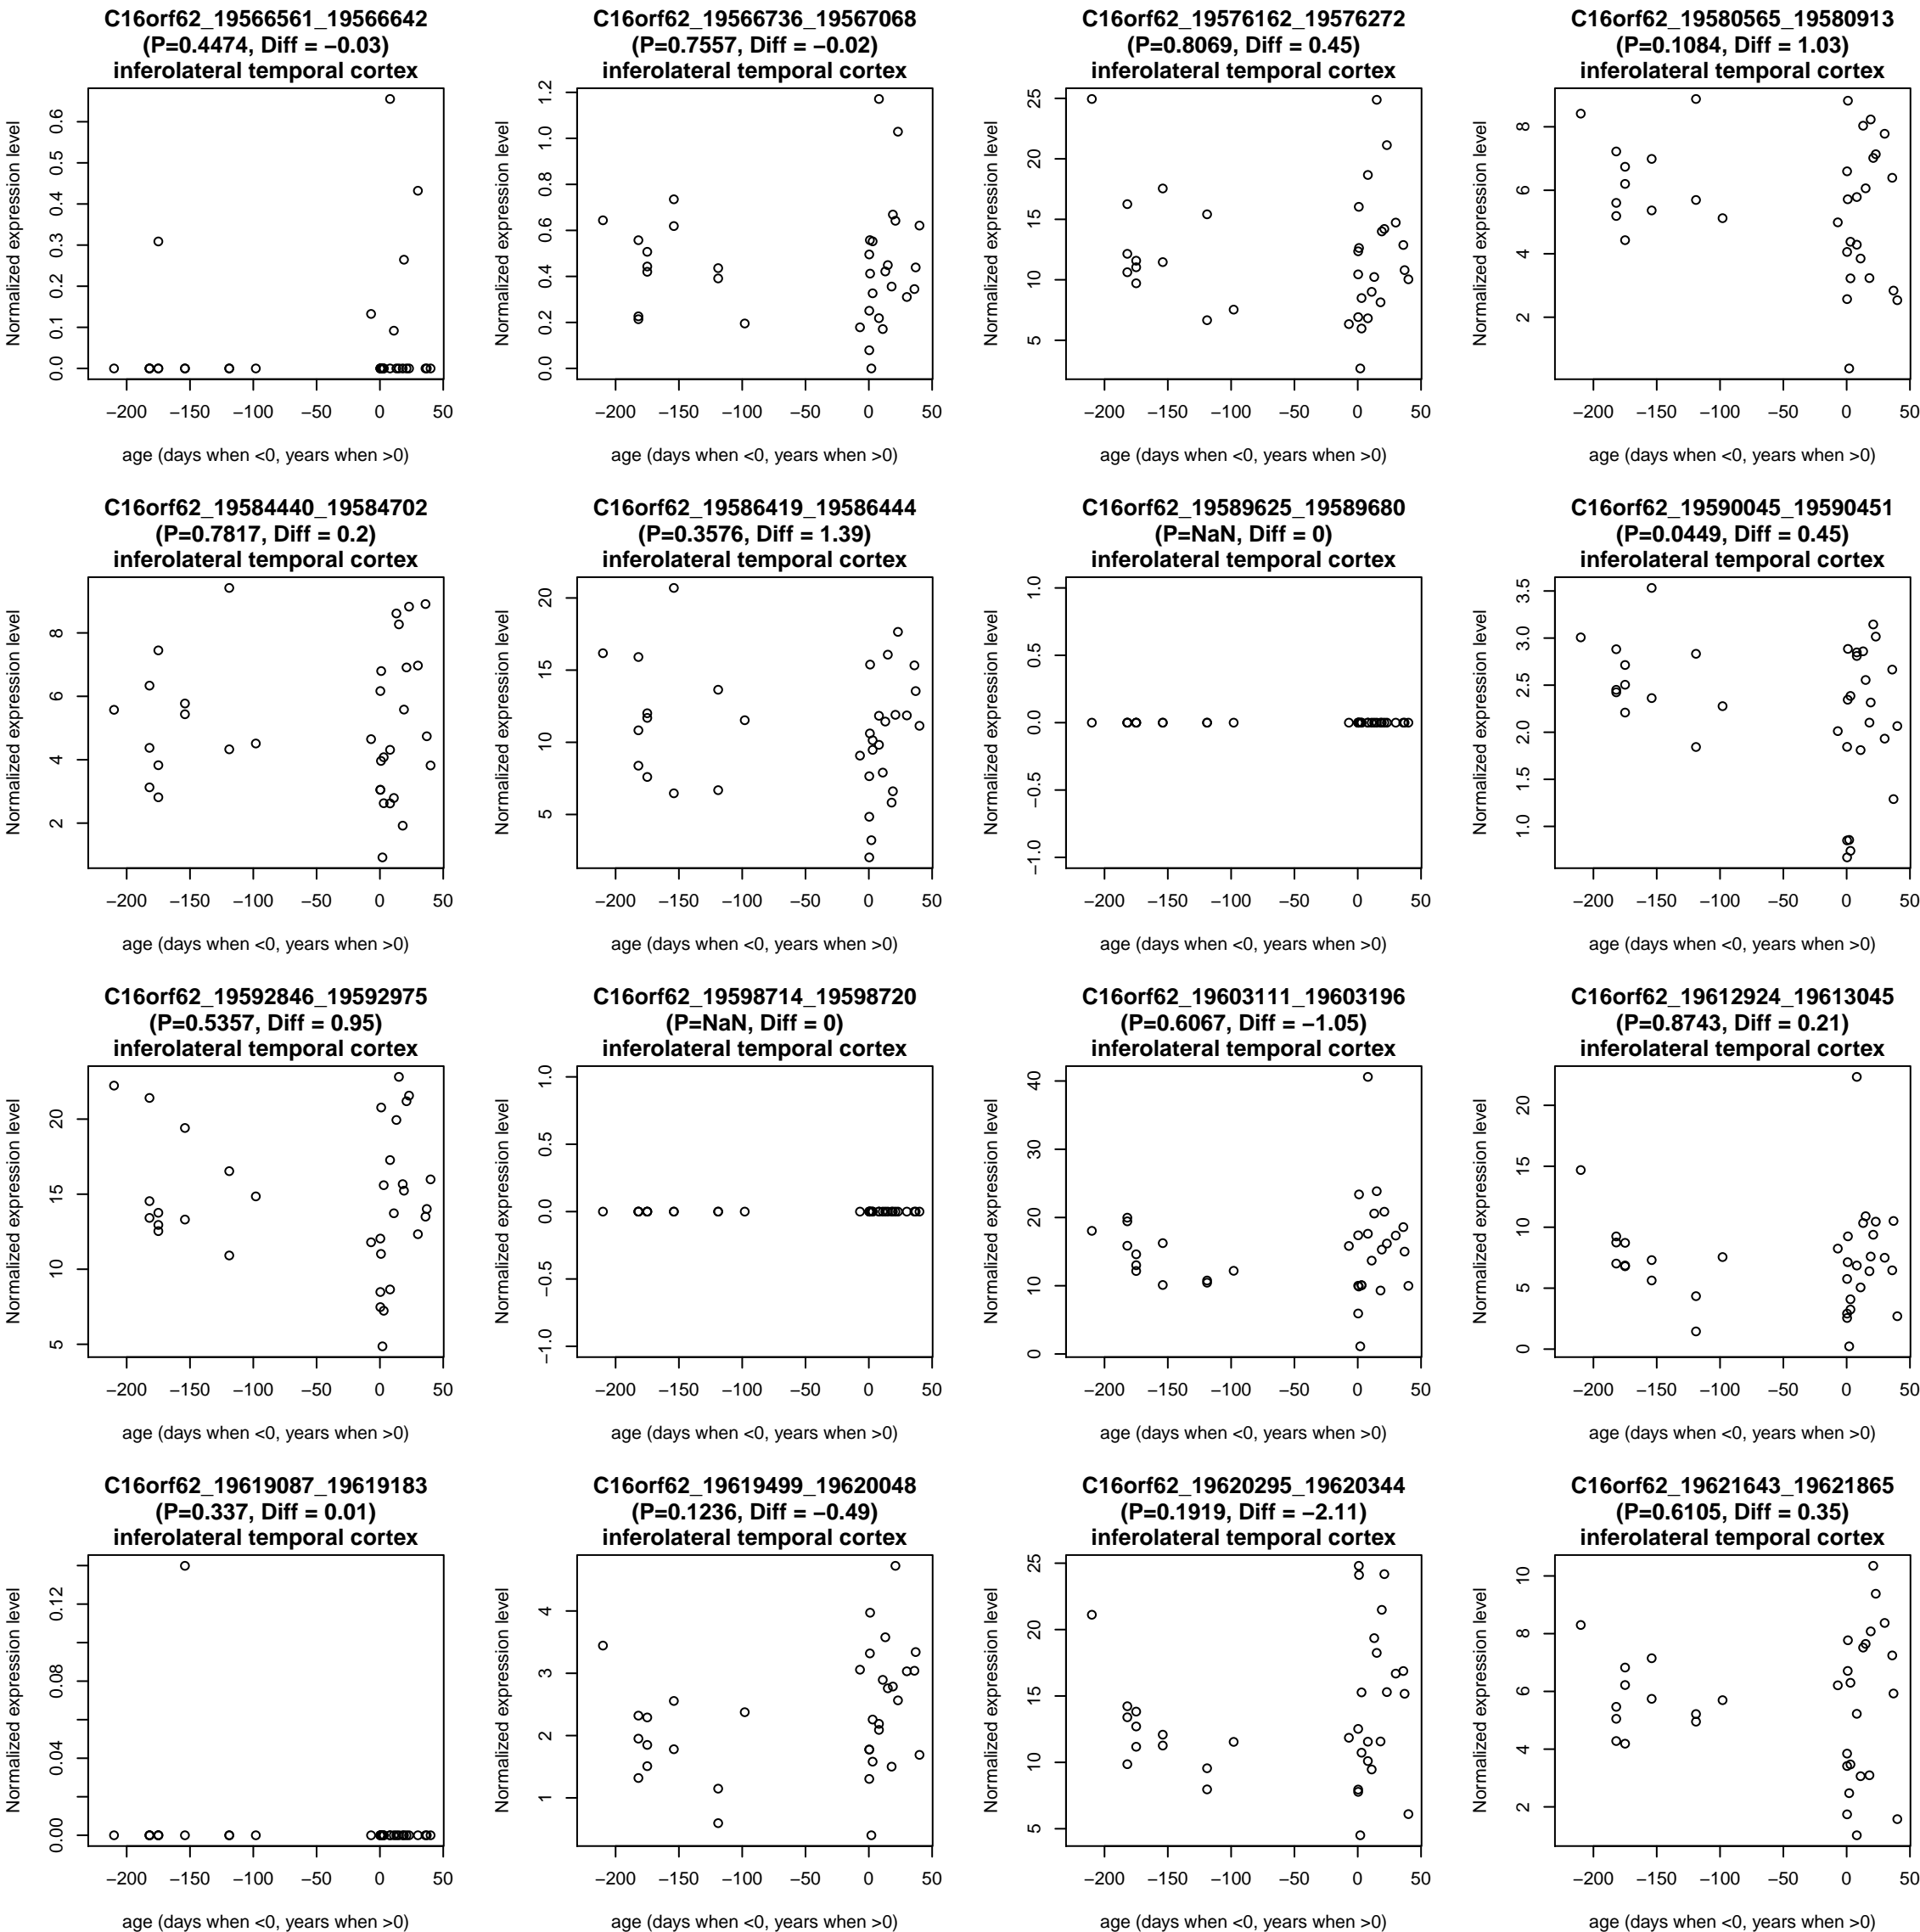

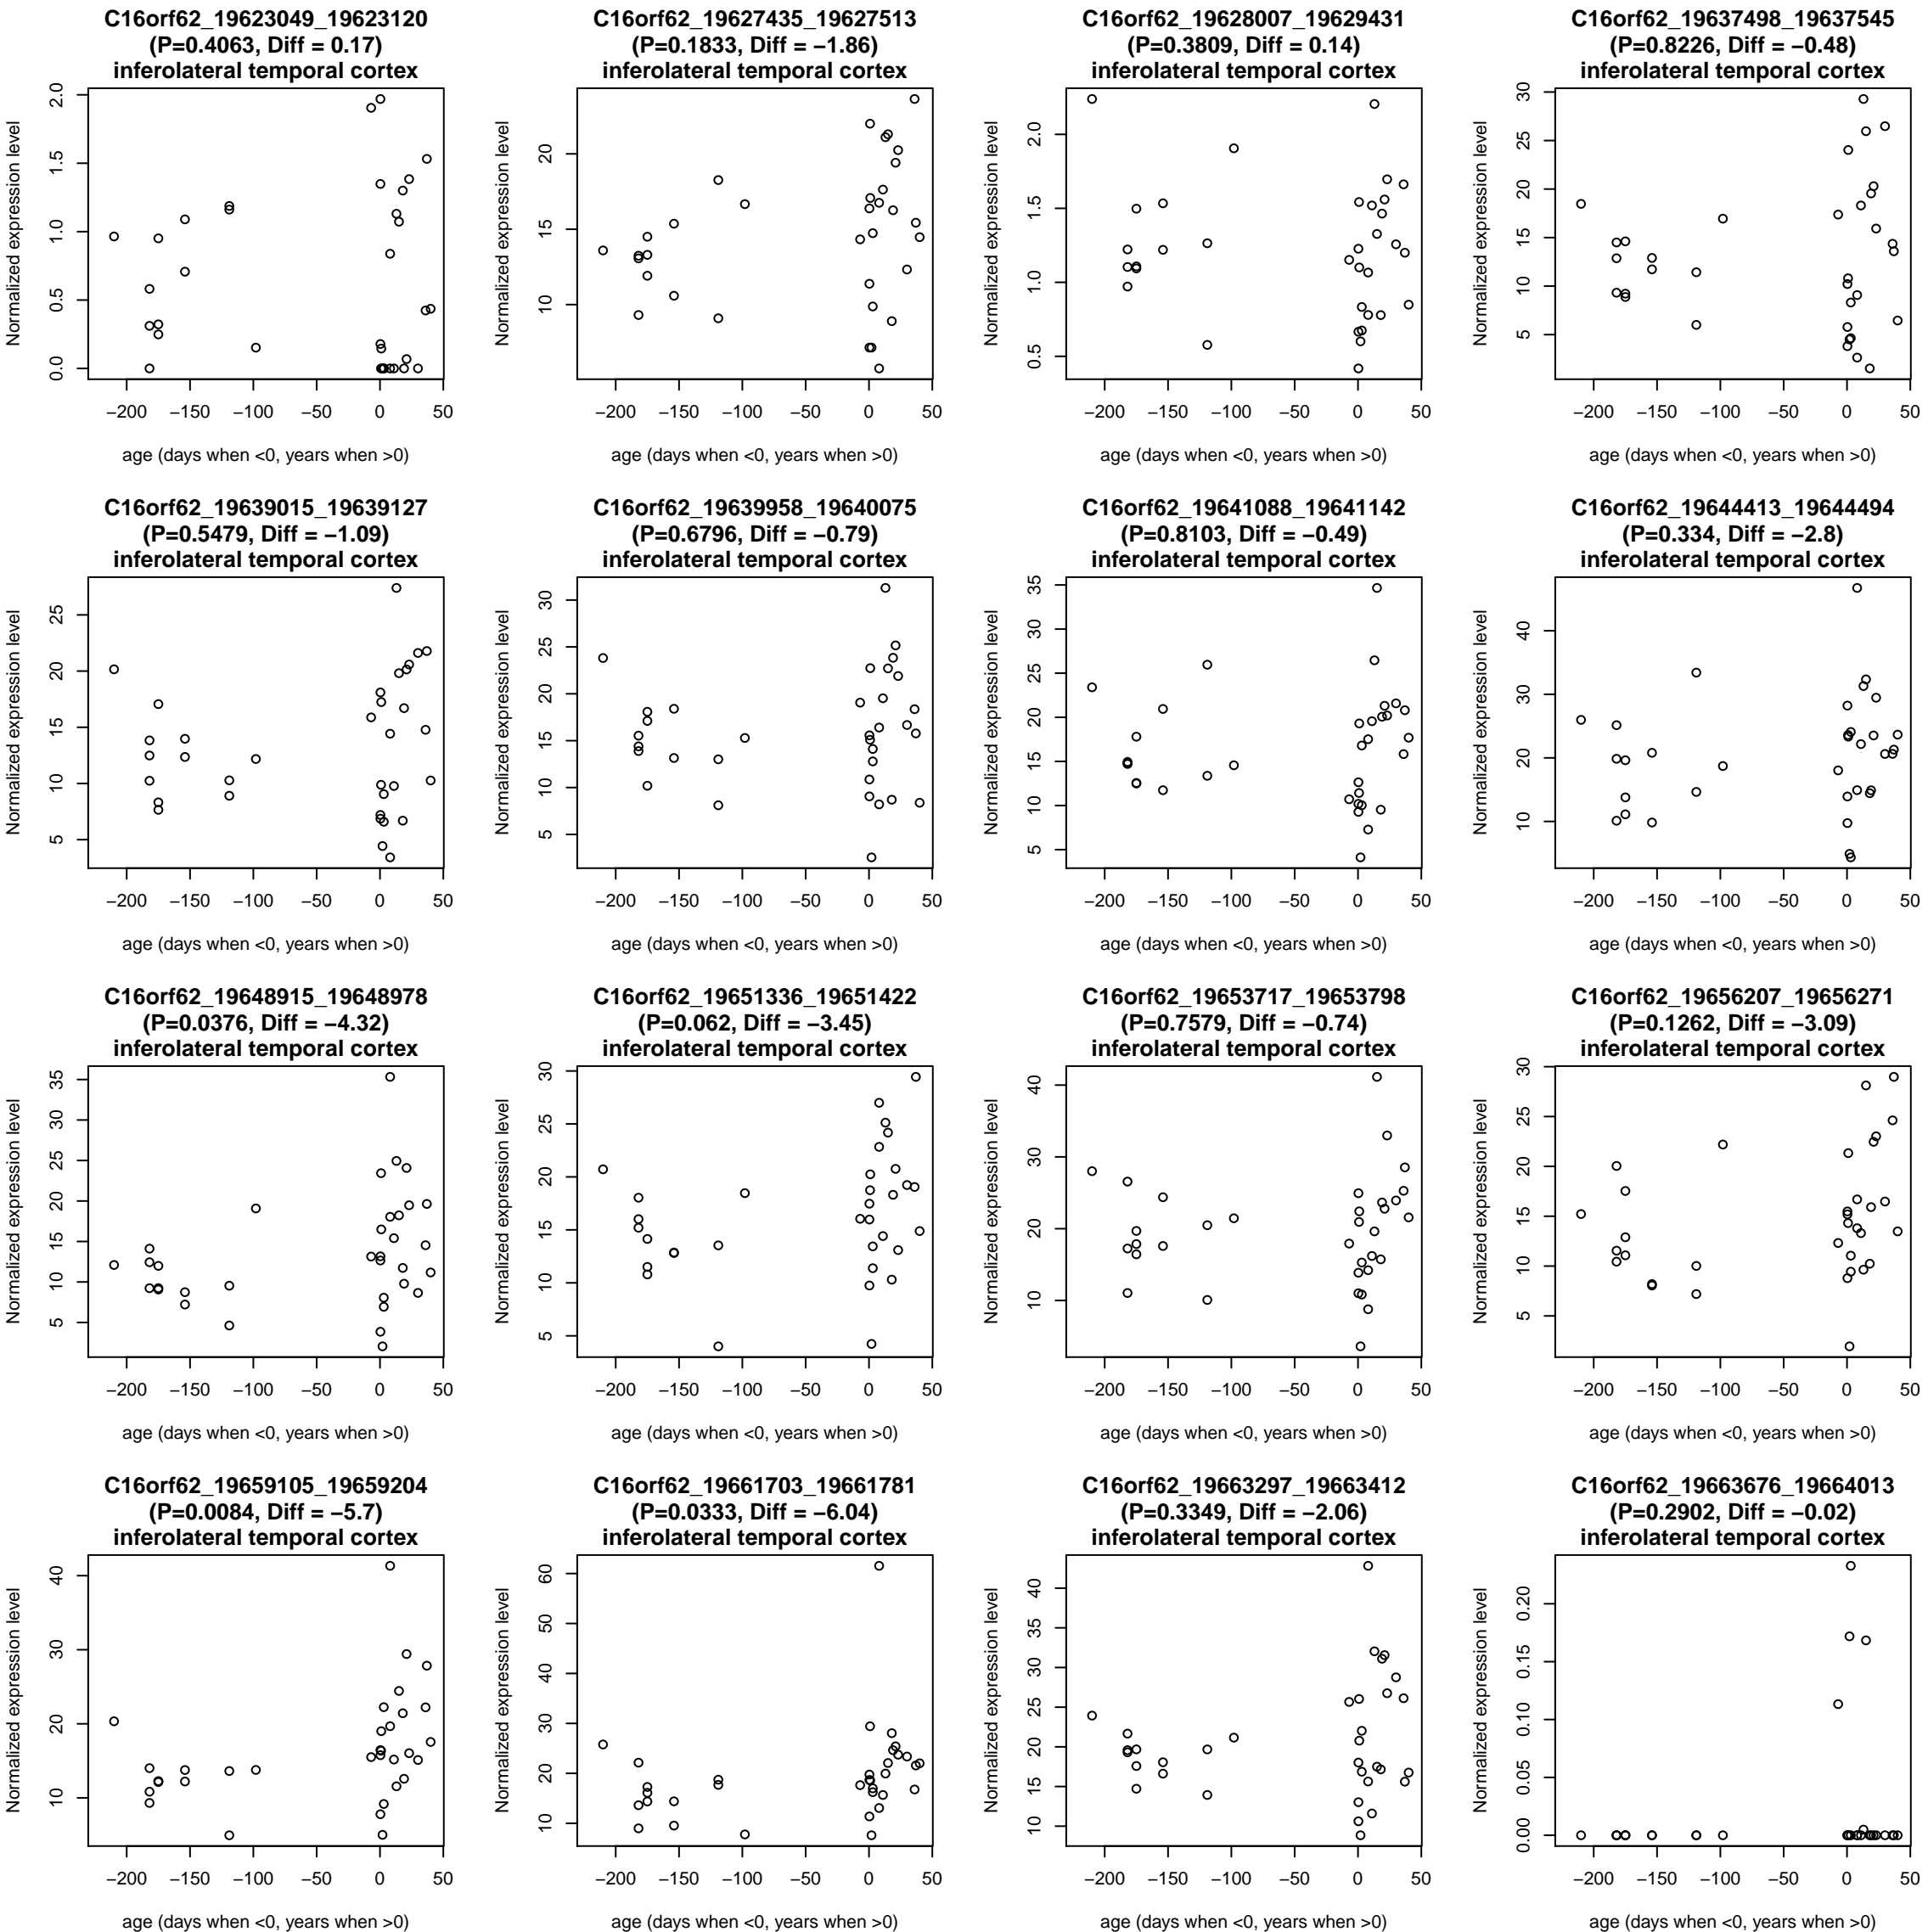

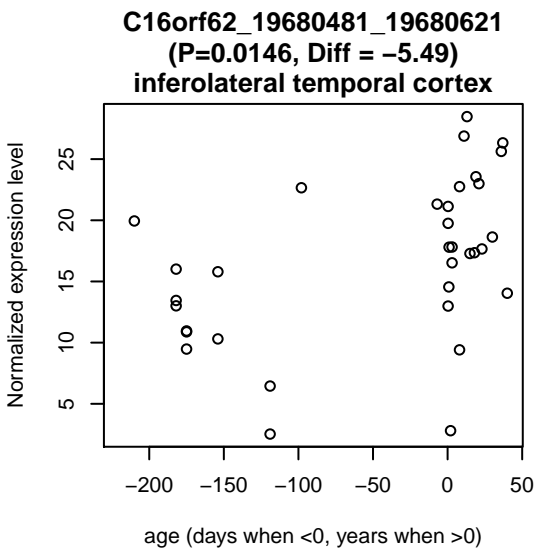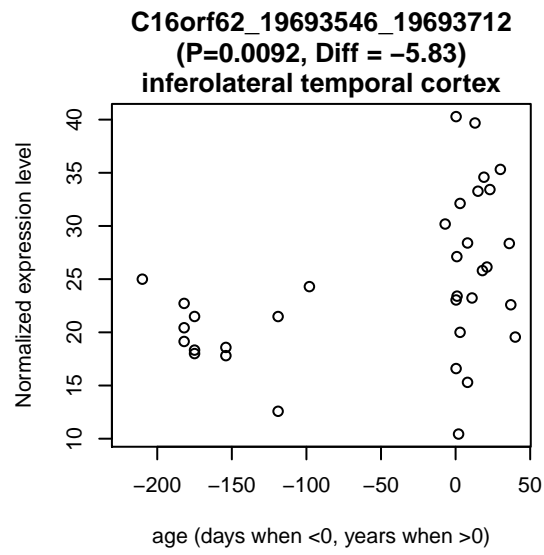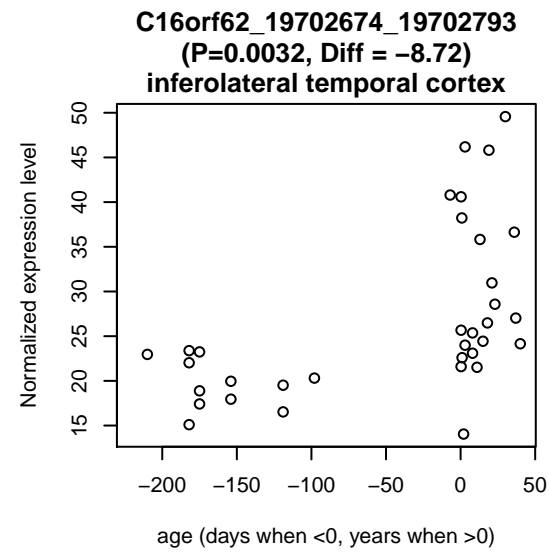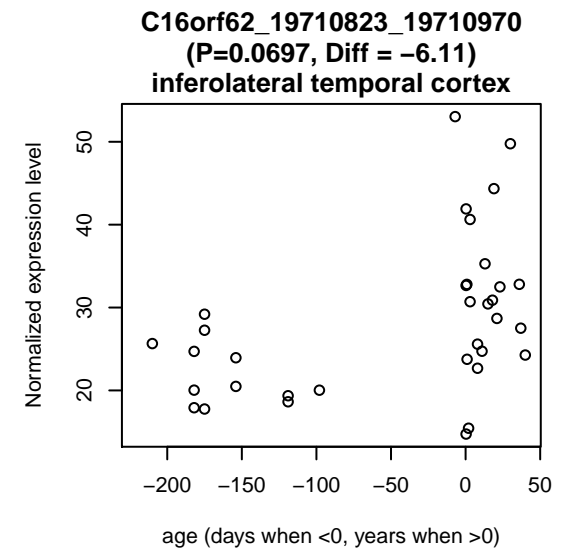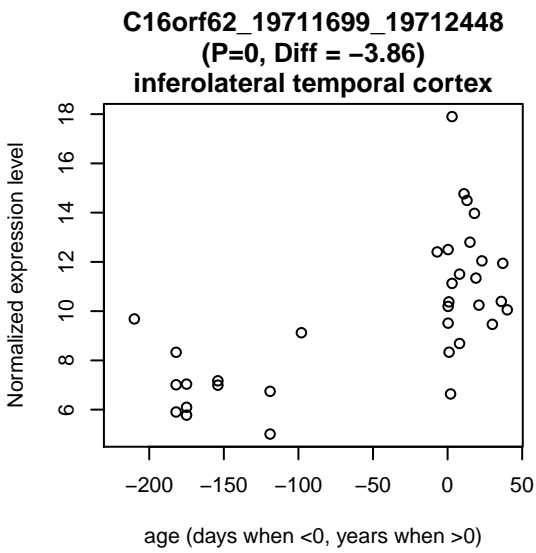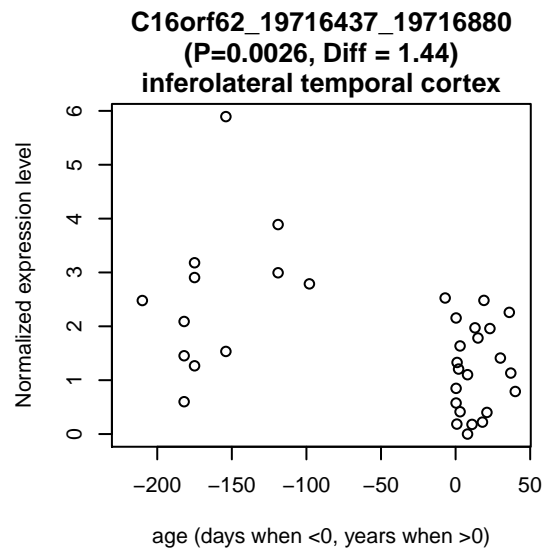



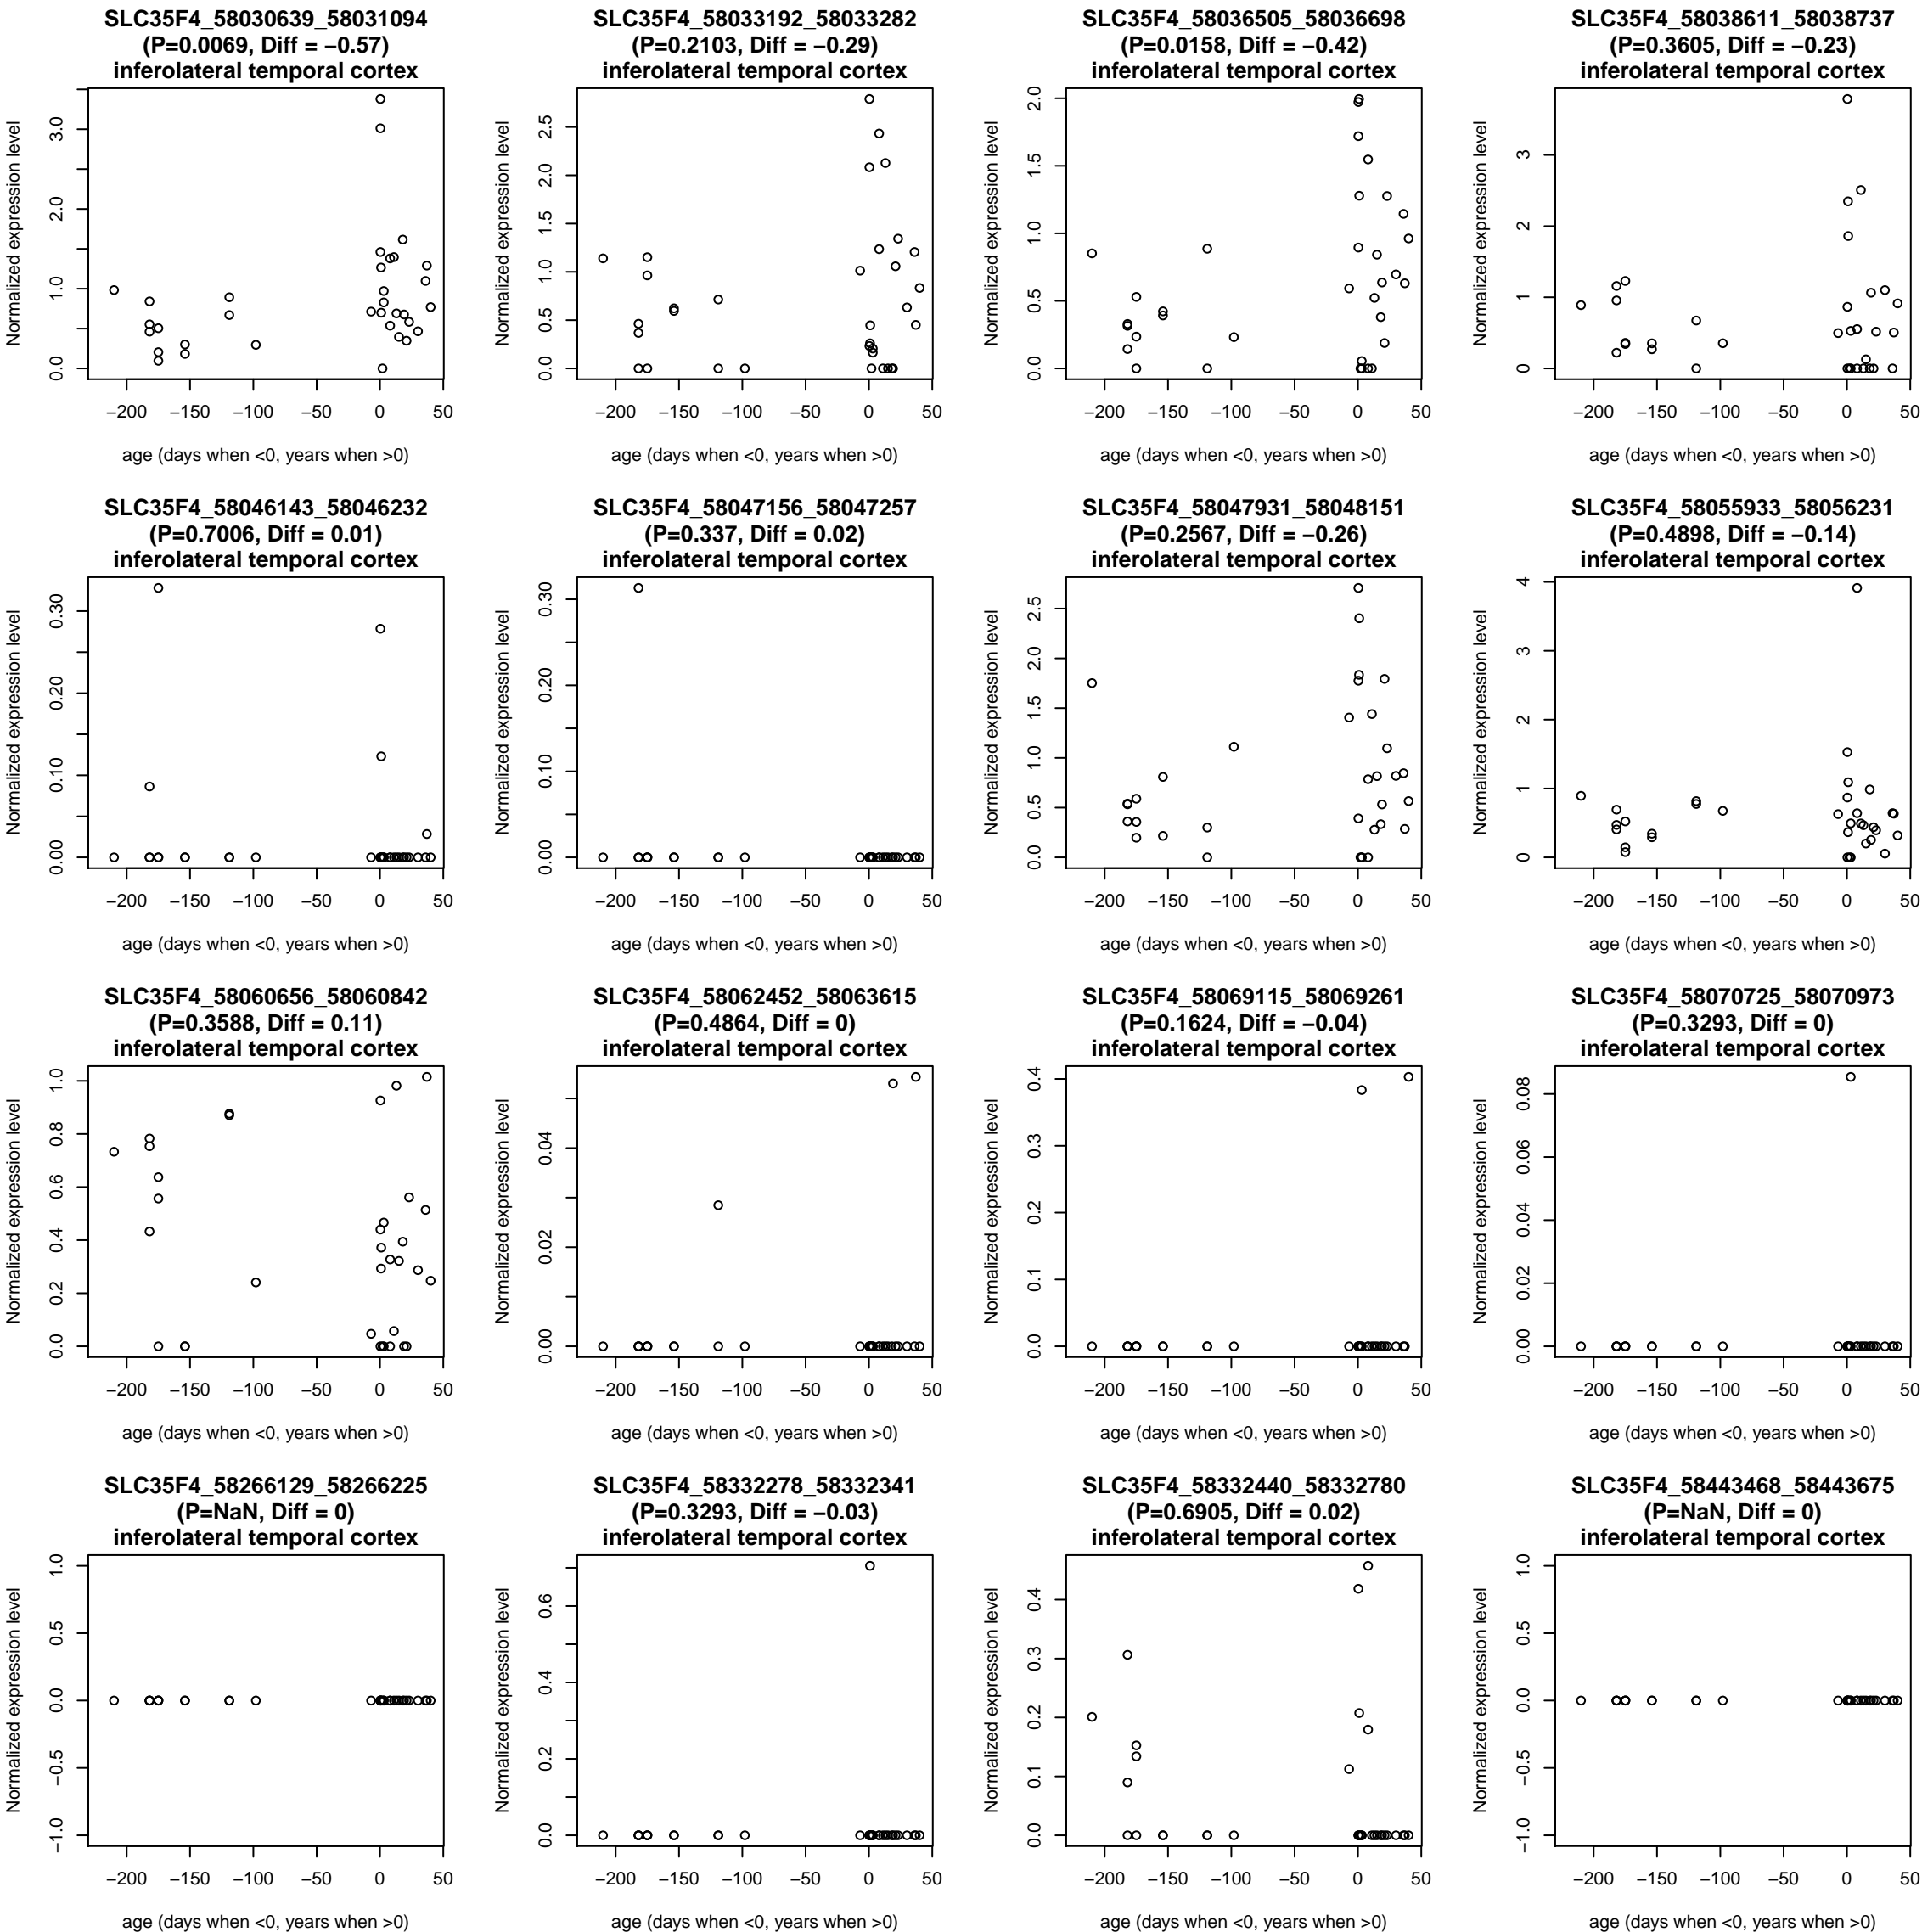

SLC35F4\_58448630\_58448912  
(P=0.3293, Diff = -0.01)  
inferolateral temporal cortex

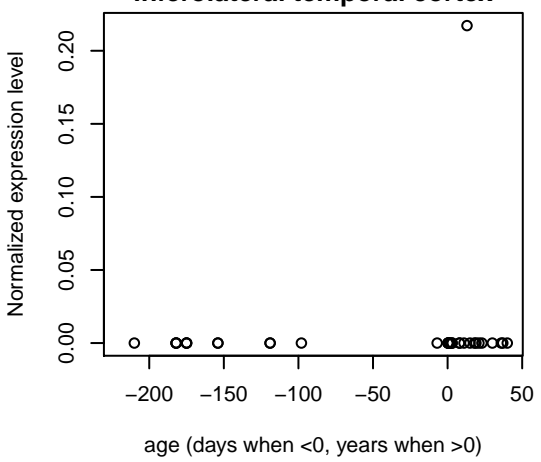

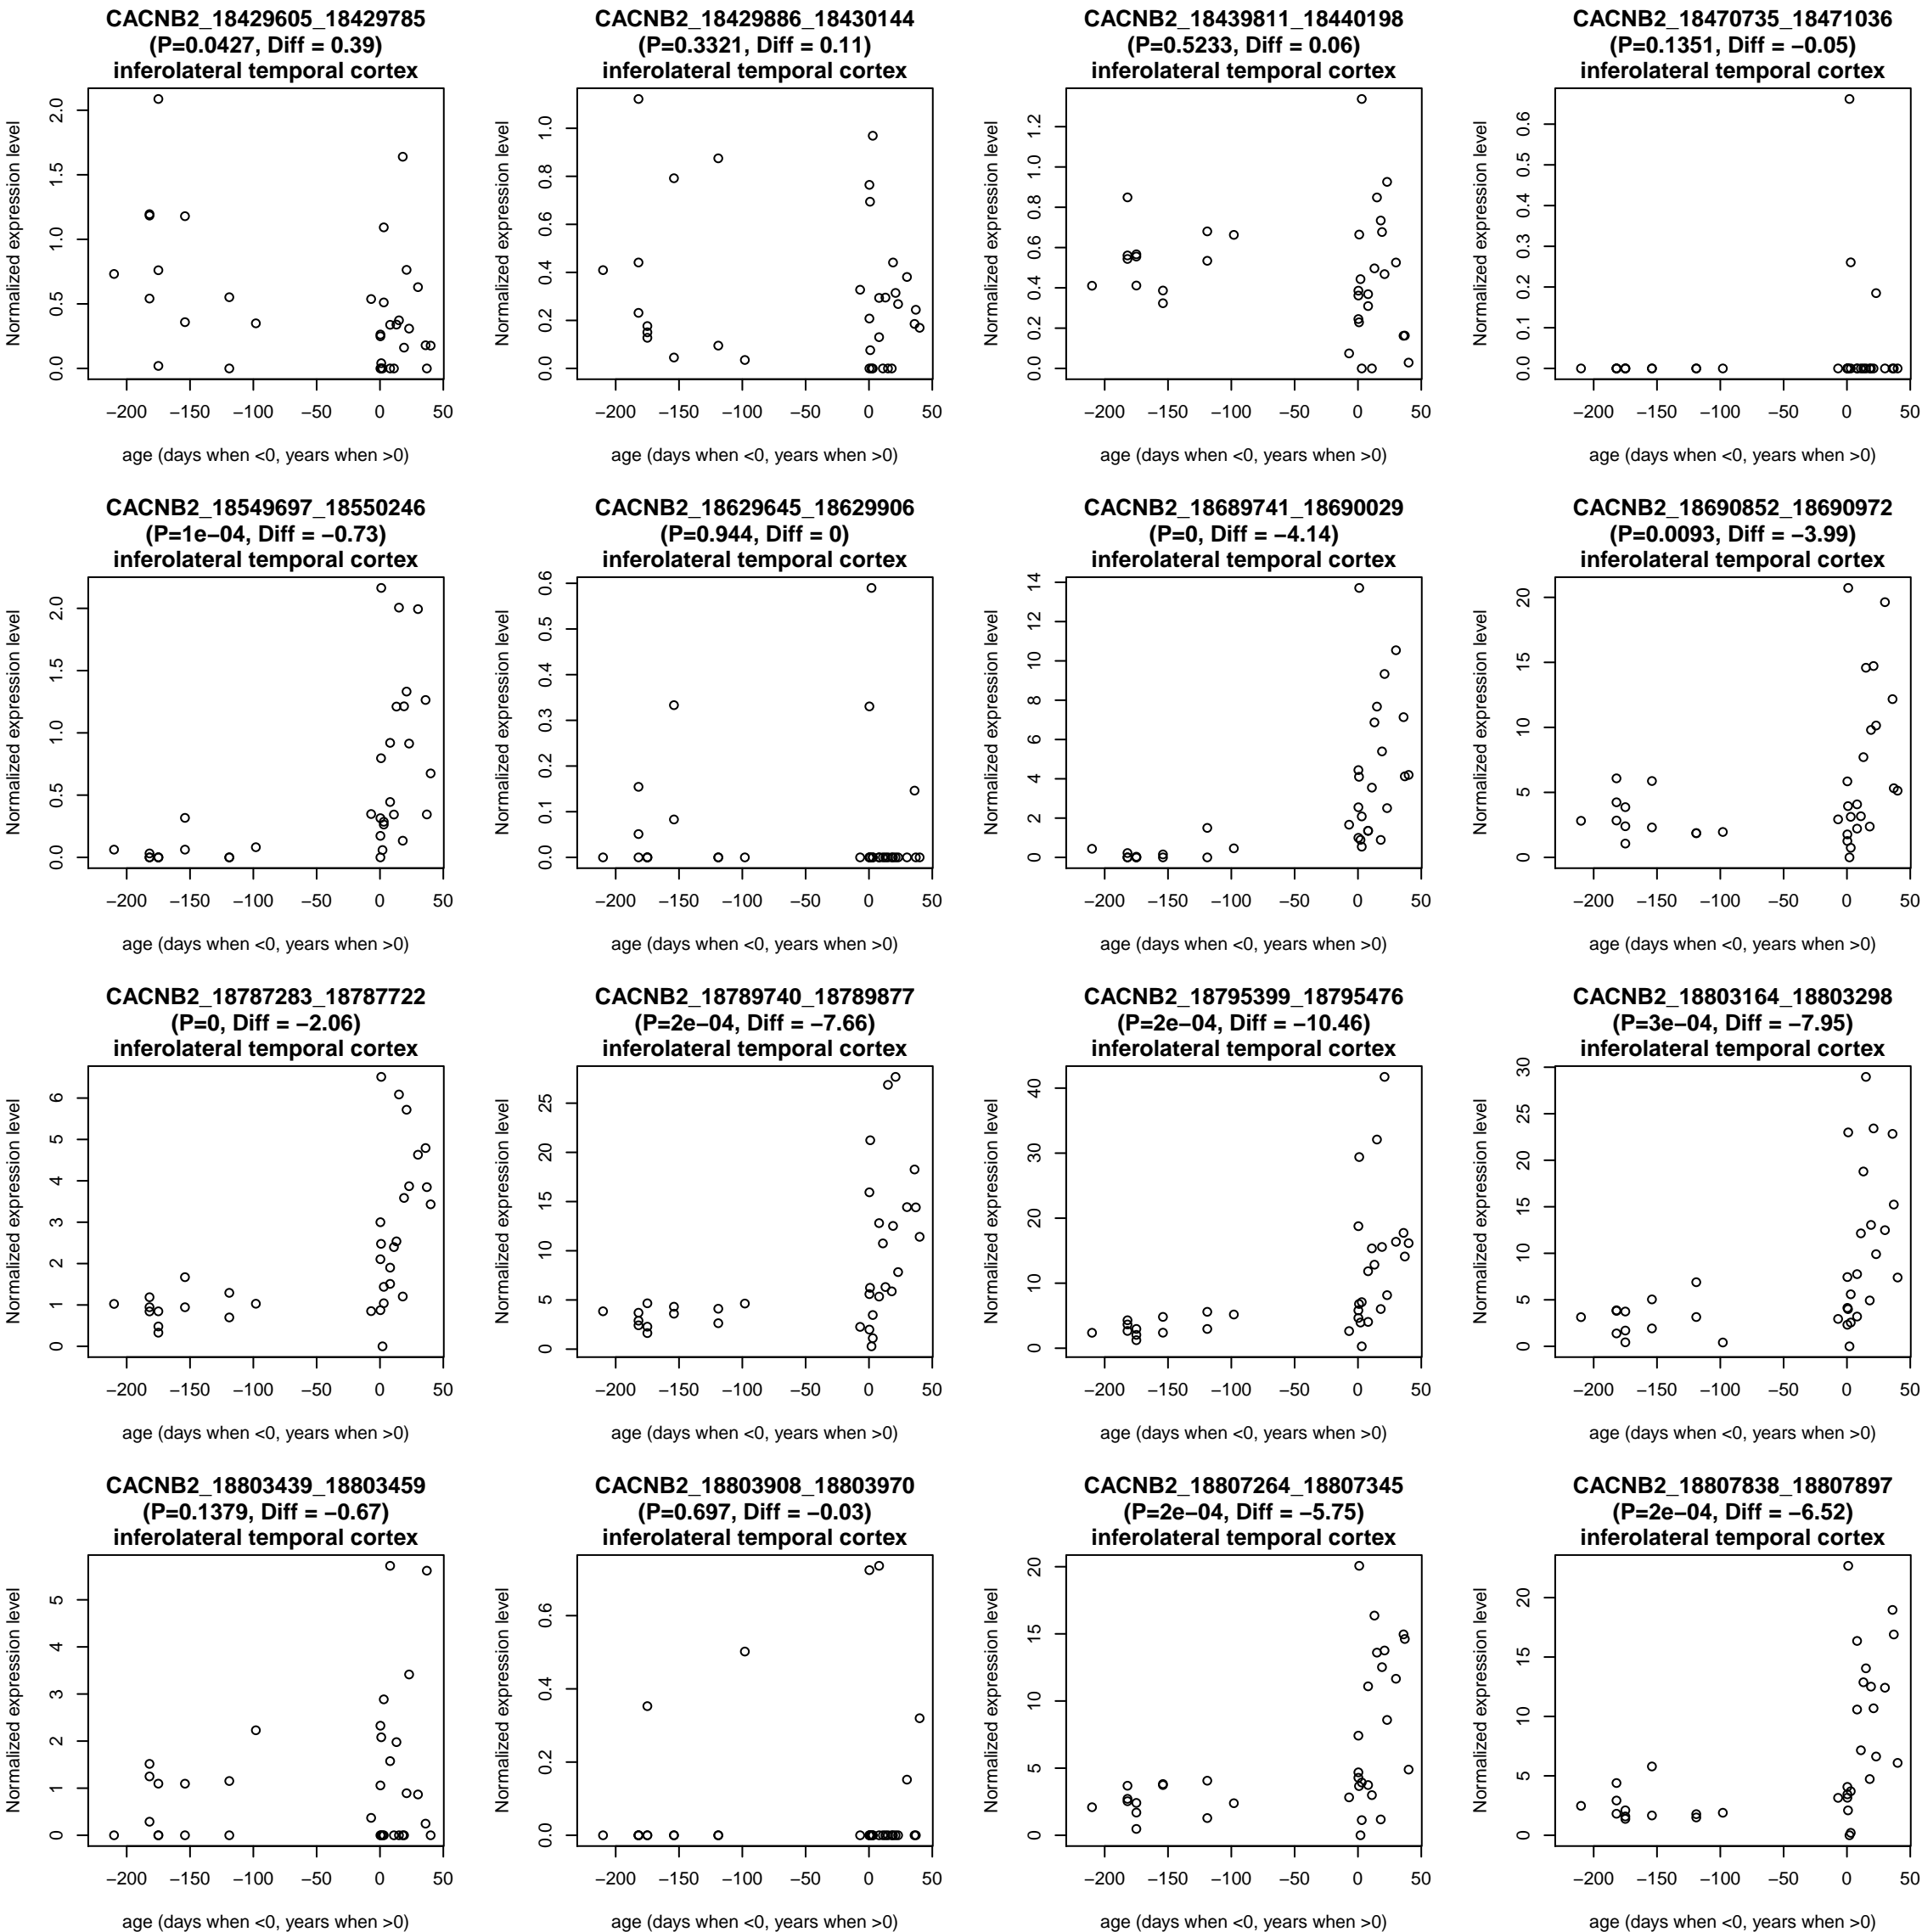

**CACNB2\_18816516\_18816626**  
(P=0, Diff = -9.65)  
inferolateral temporal cortex

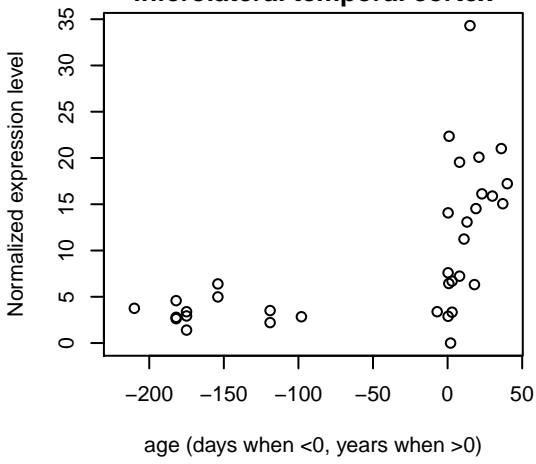

**CACNB2\_18823004\_18823156**  
(P=1e-04, Diff = -8.96)  
inferolateral temporal cortex

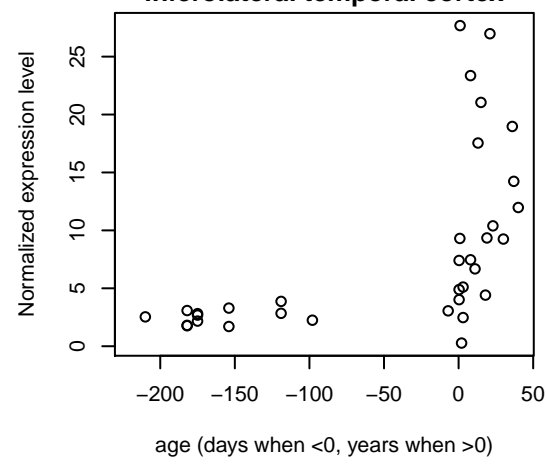

**CACNB2\_18825029\_18825125**  
(P=0, Diff = -9.51)  
inferolateral temporal cortex

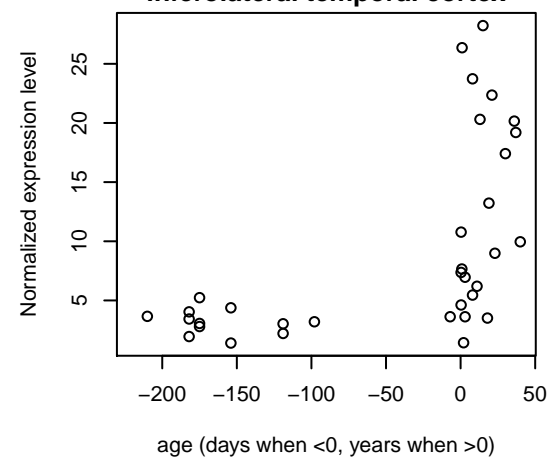

**CACNB2\_18827108\_18827294**  
(P=3e-04, Diff = -9.2)  
inferolateral temporal cortex

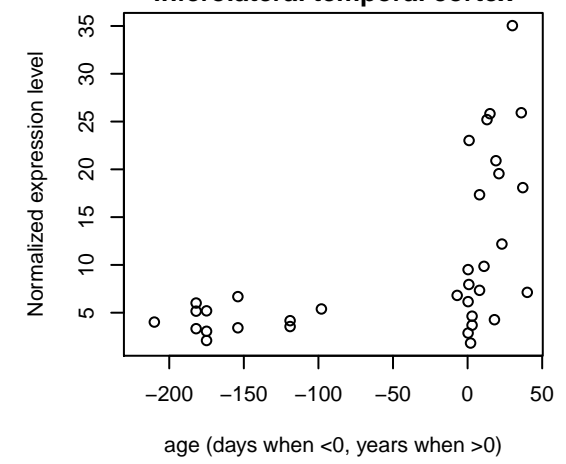

**CACNB2\_18828158\_18830798**  
(P=0, Diff = -9.06)  
inferolateral temporal cortex

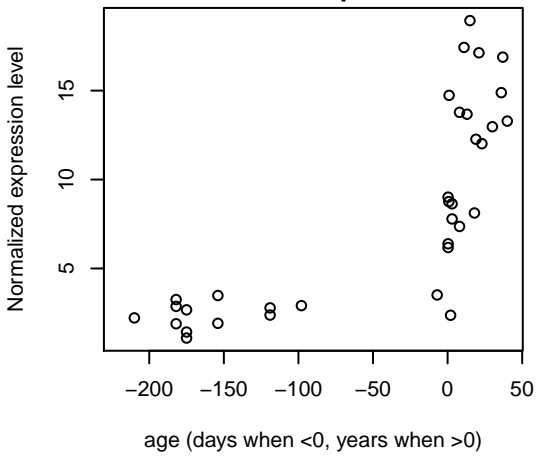

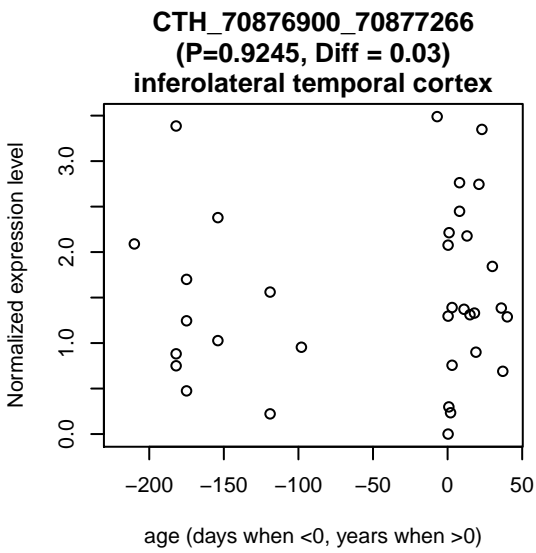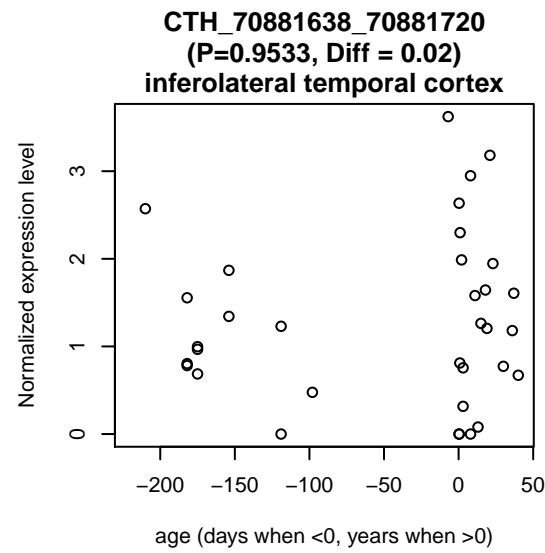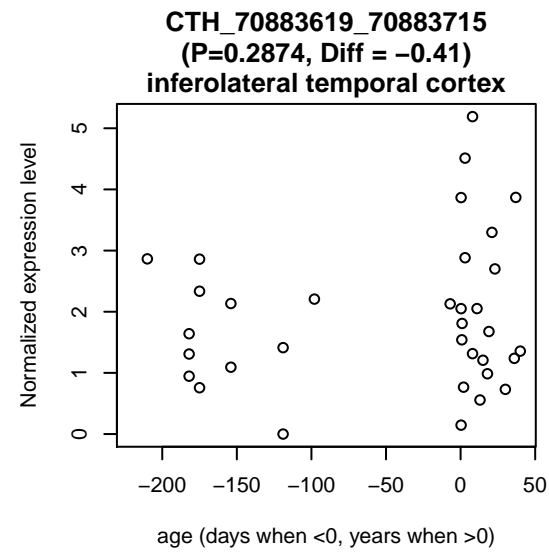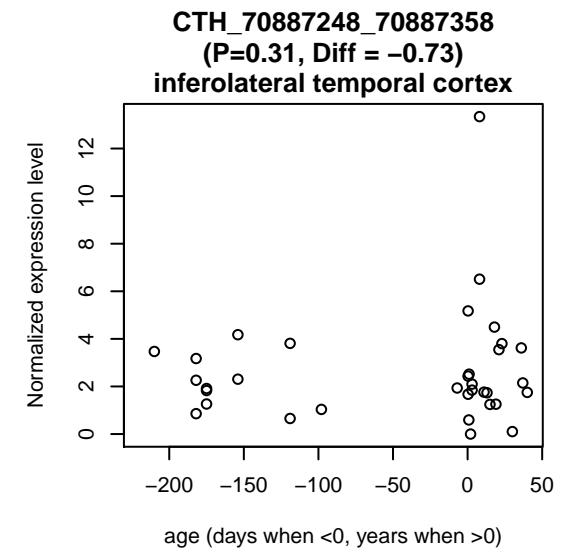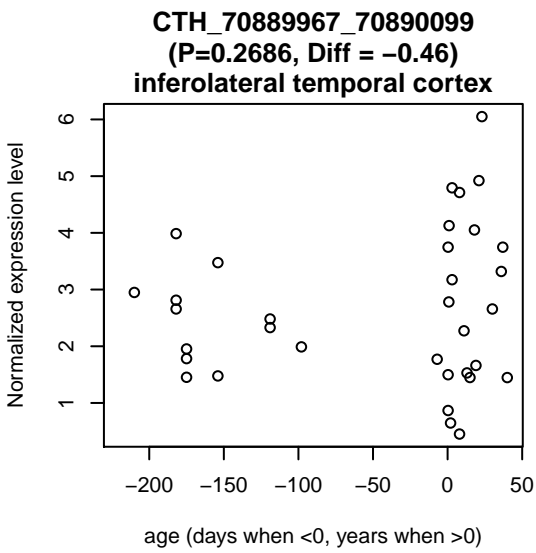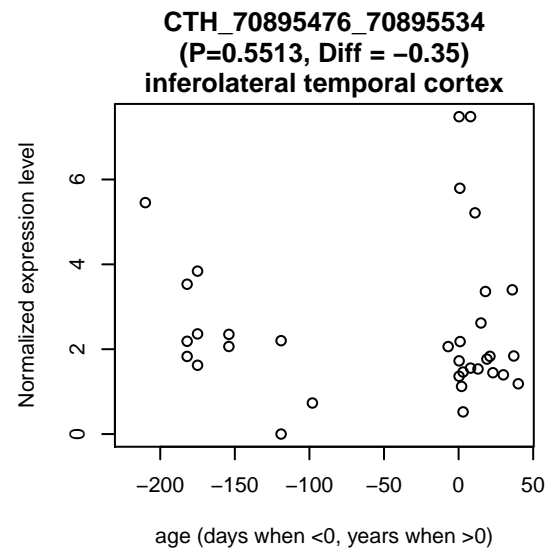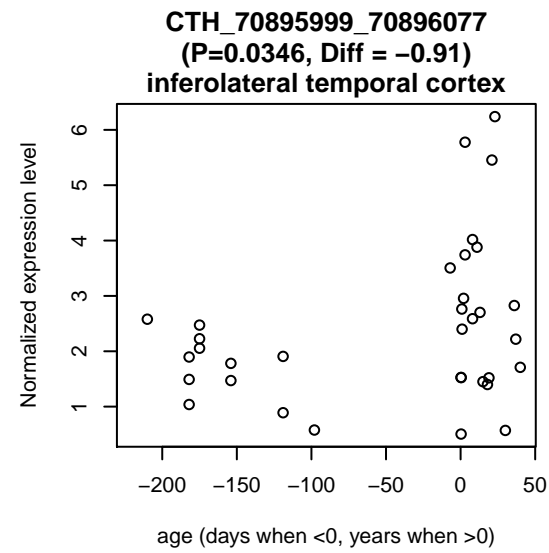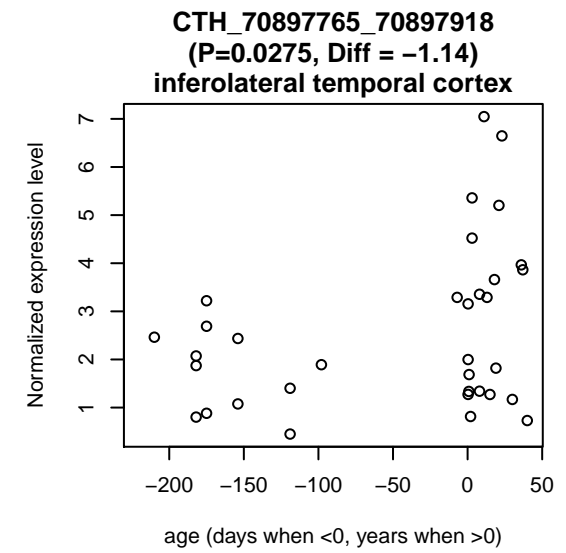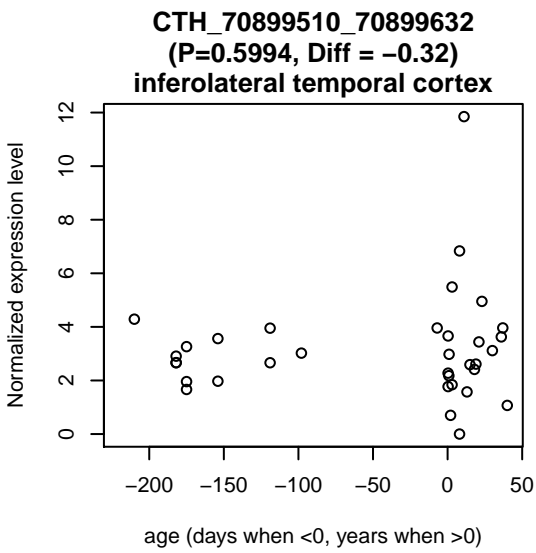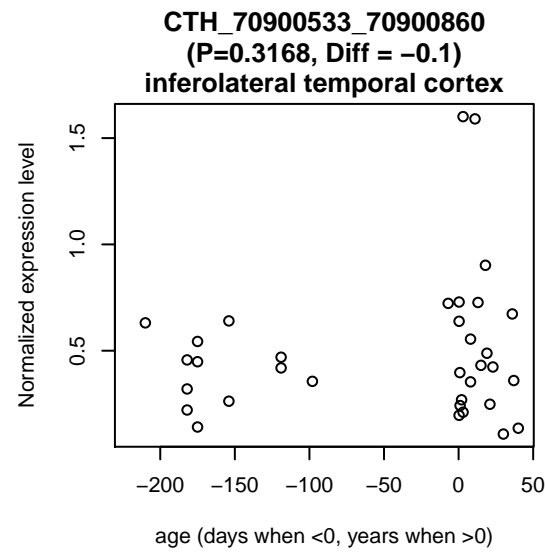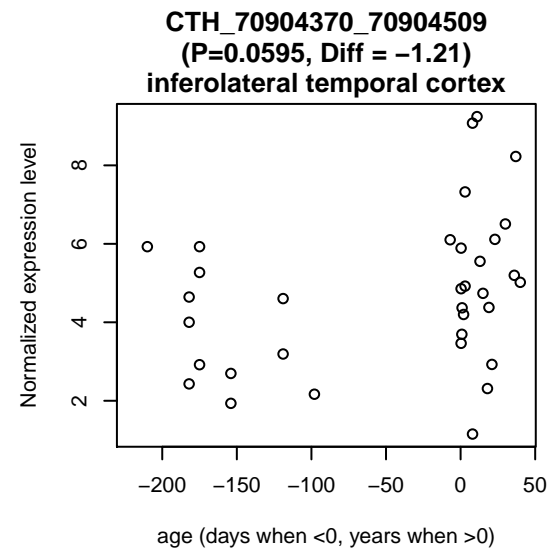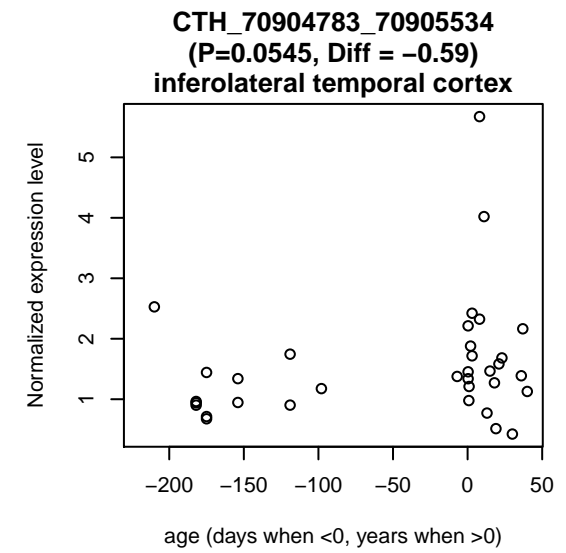

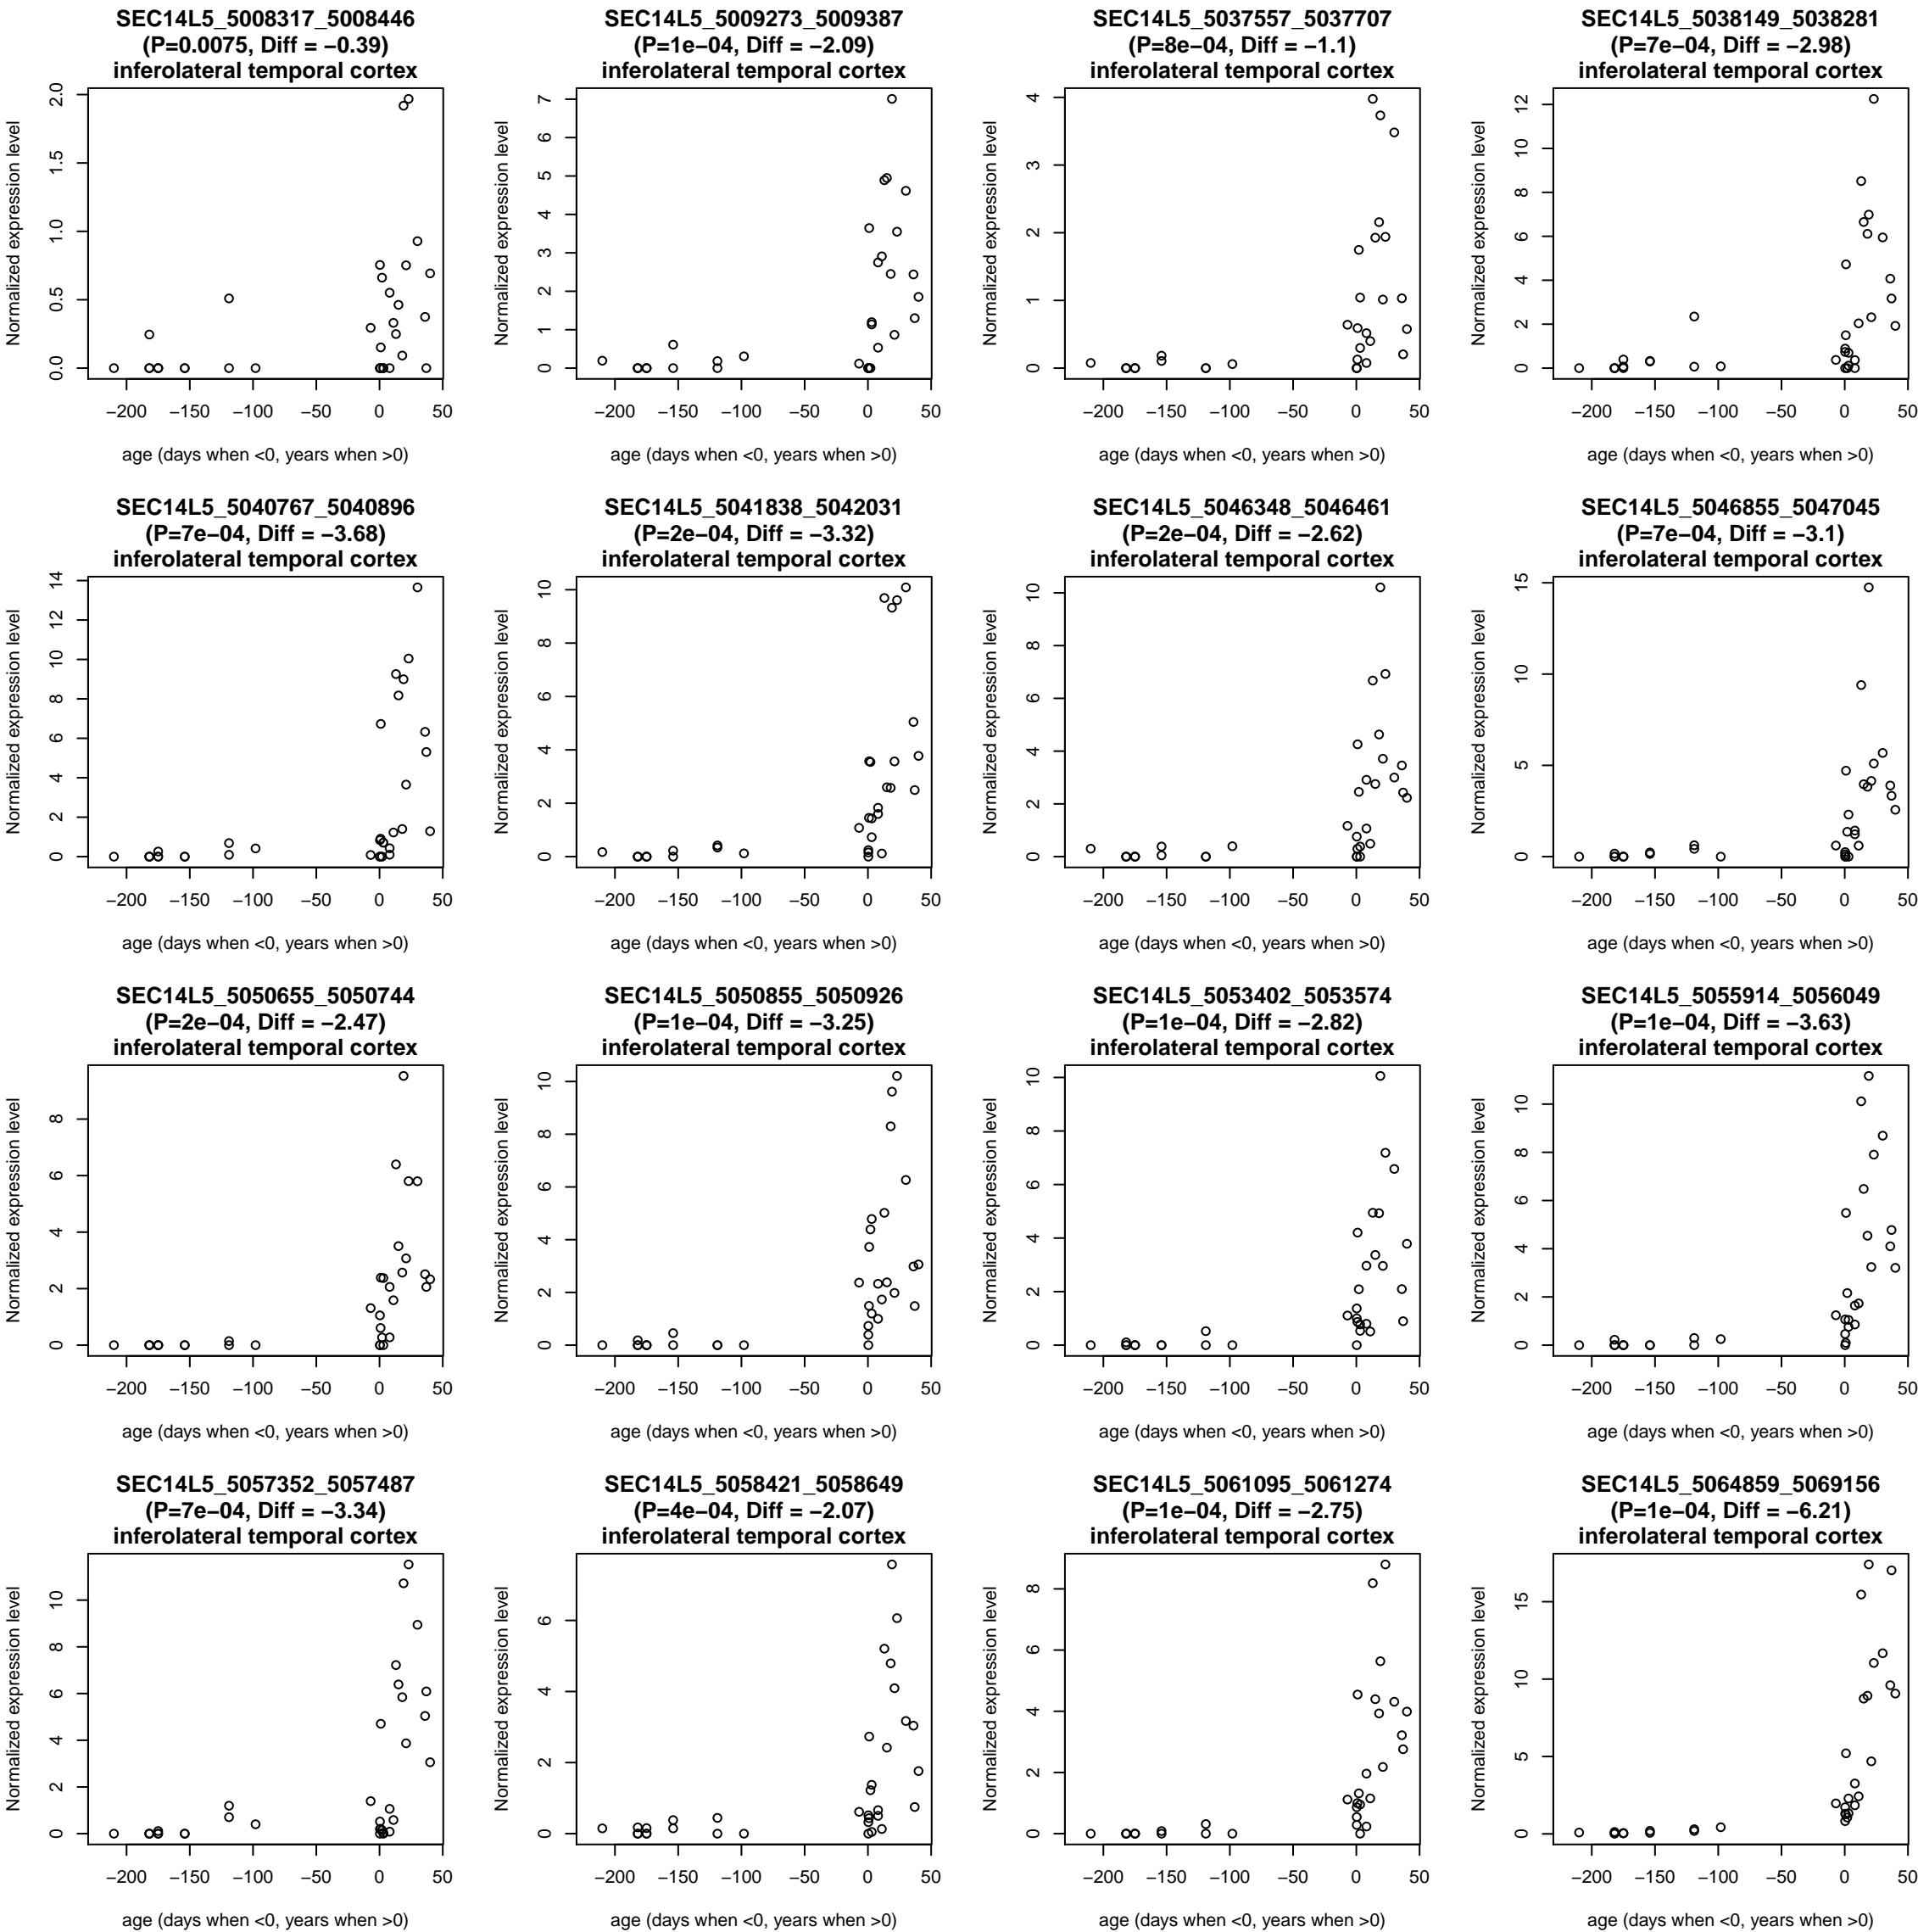

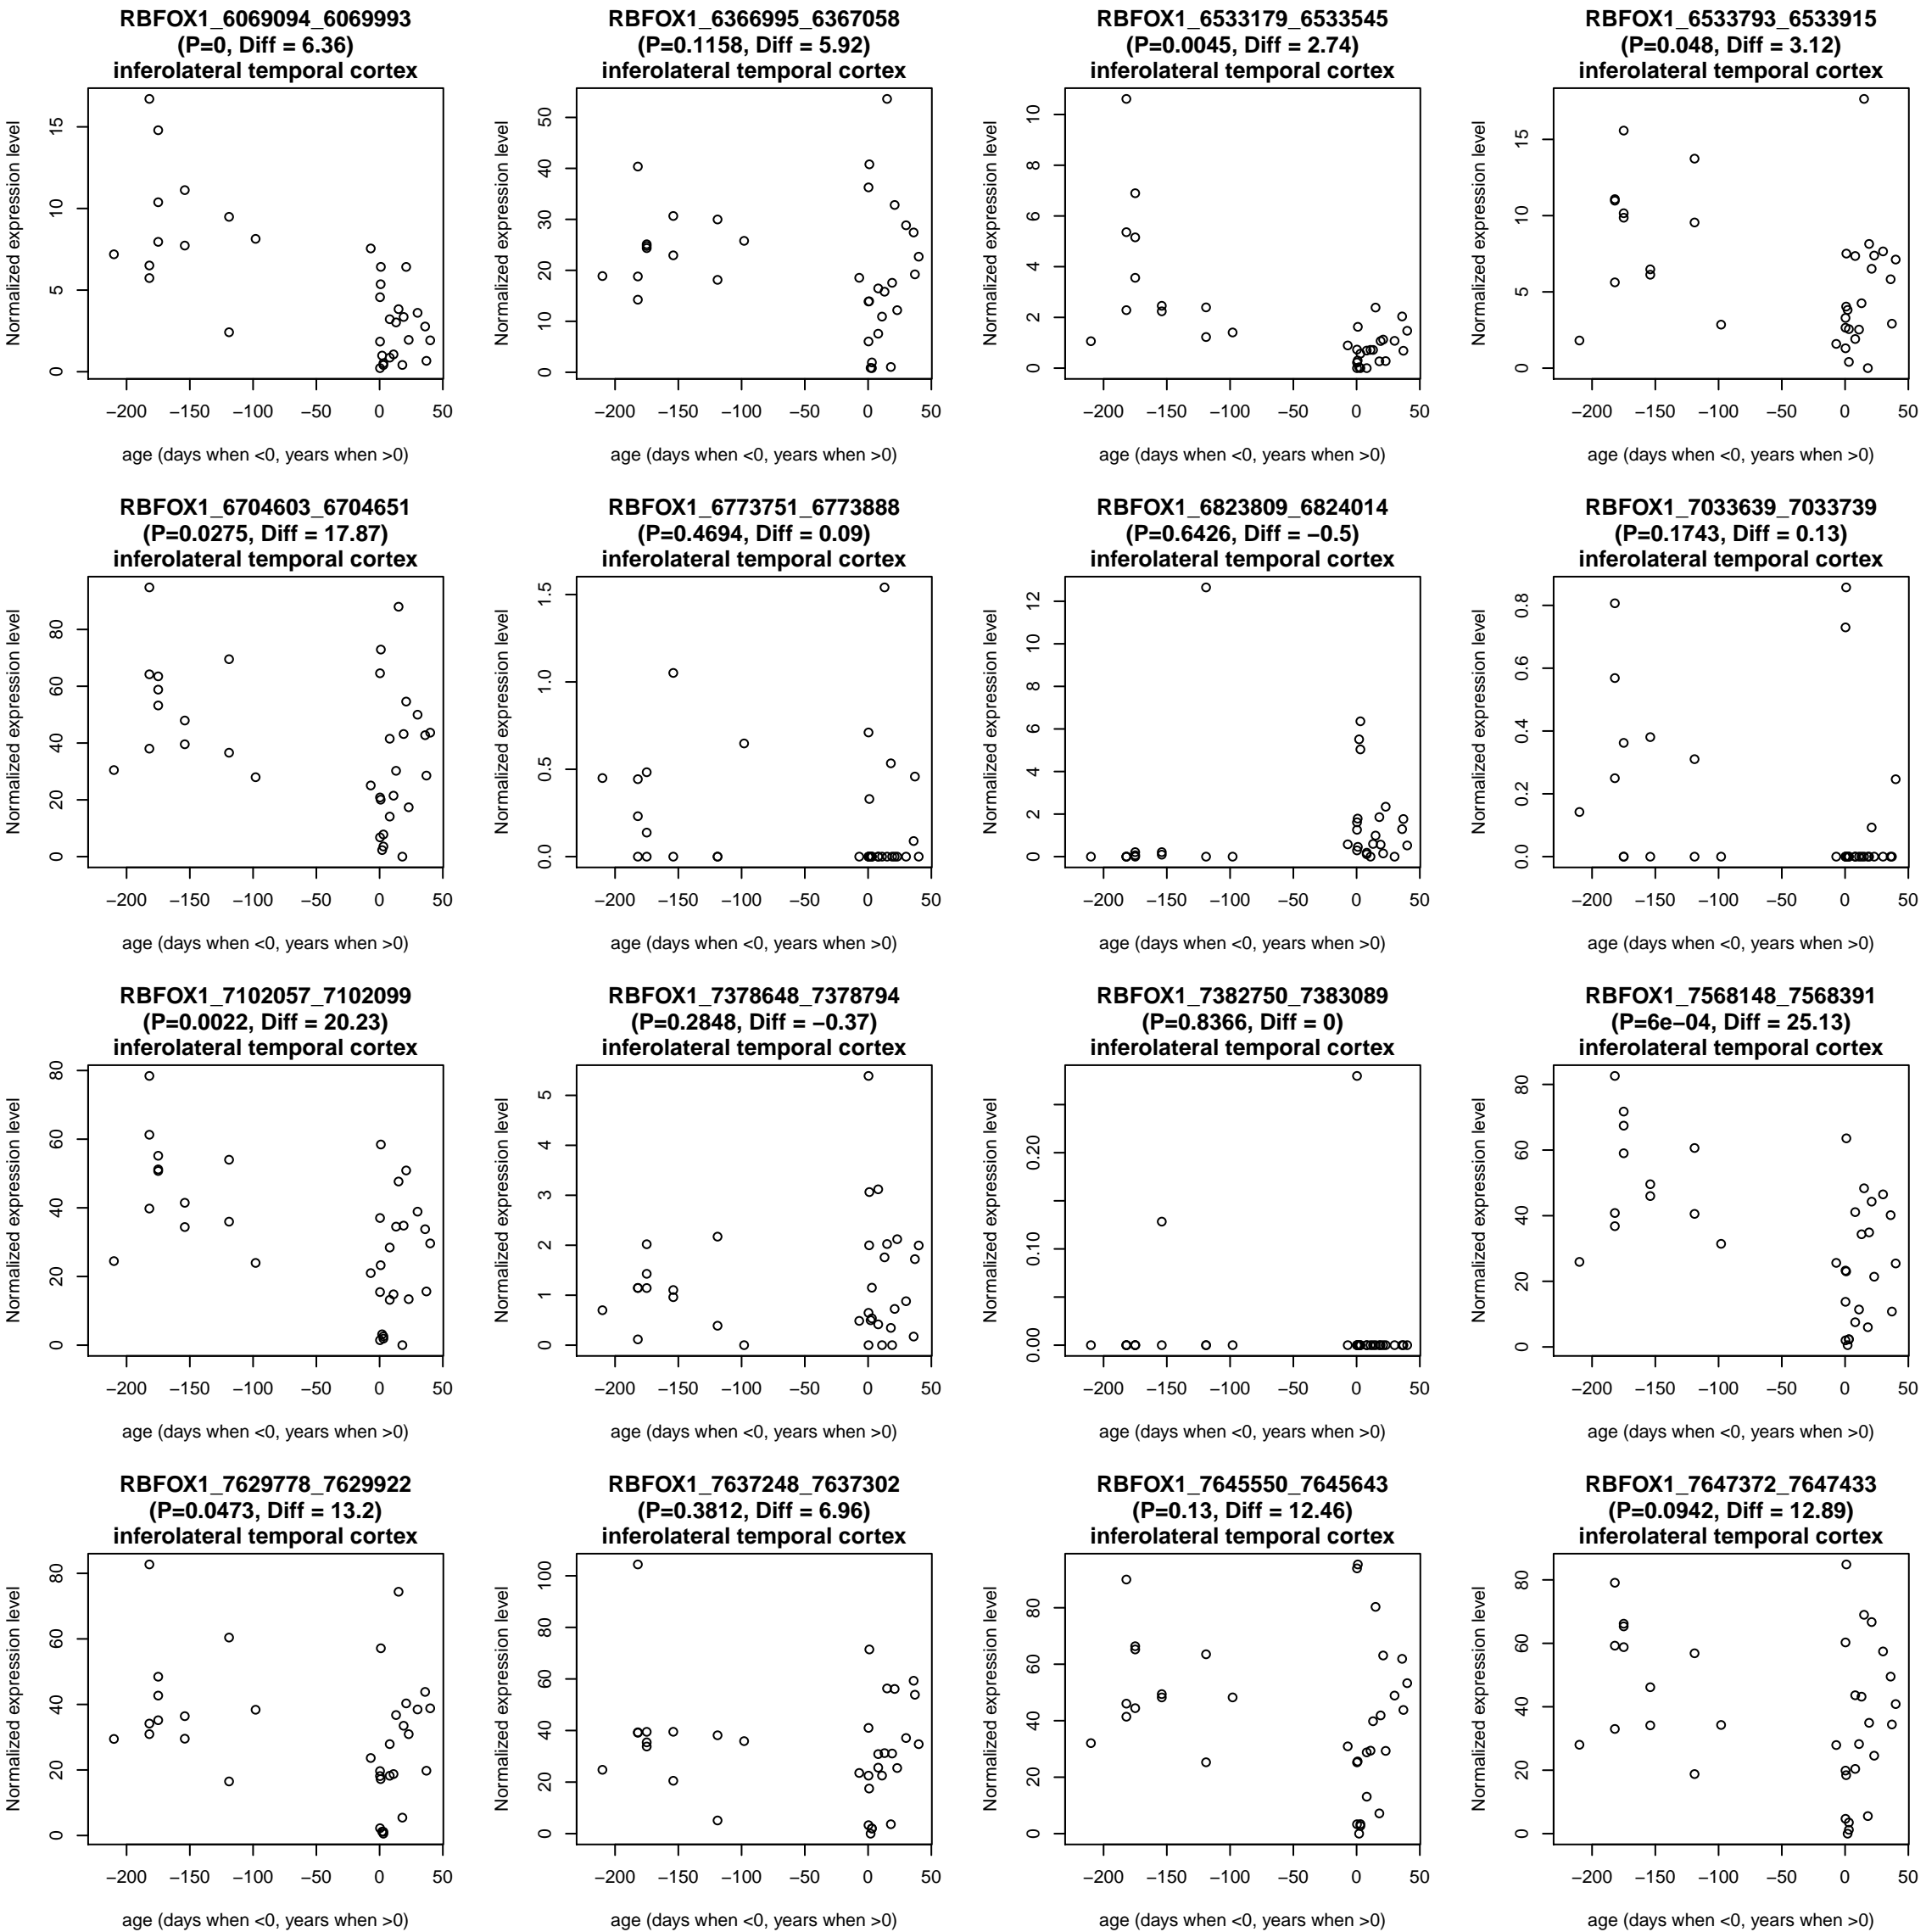

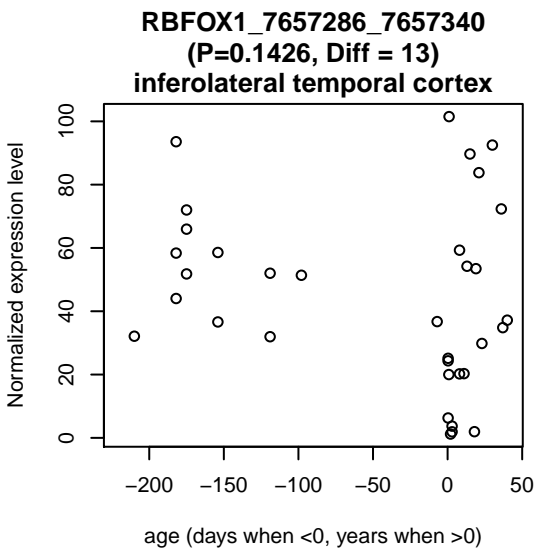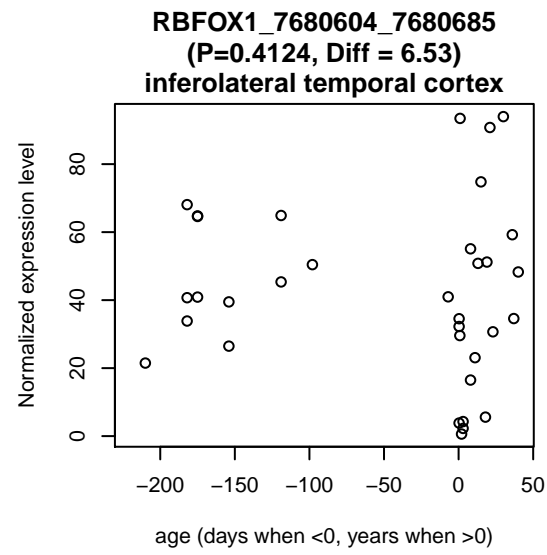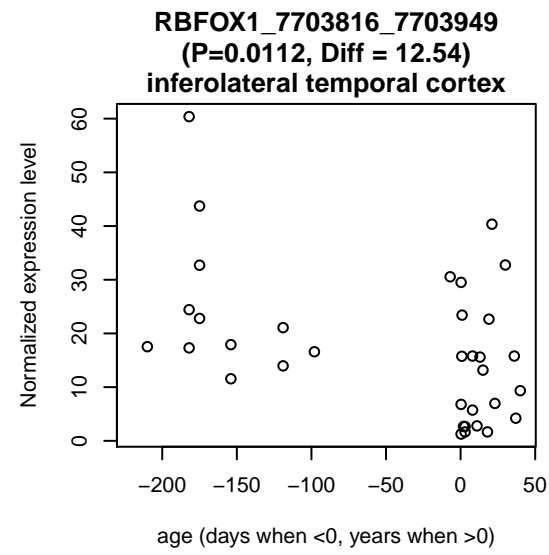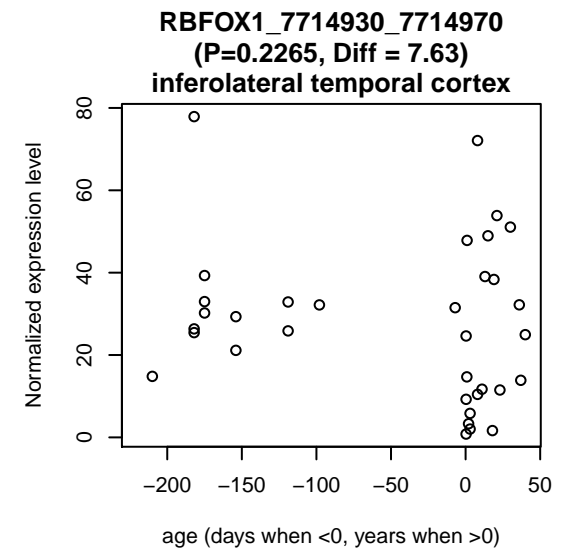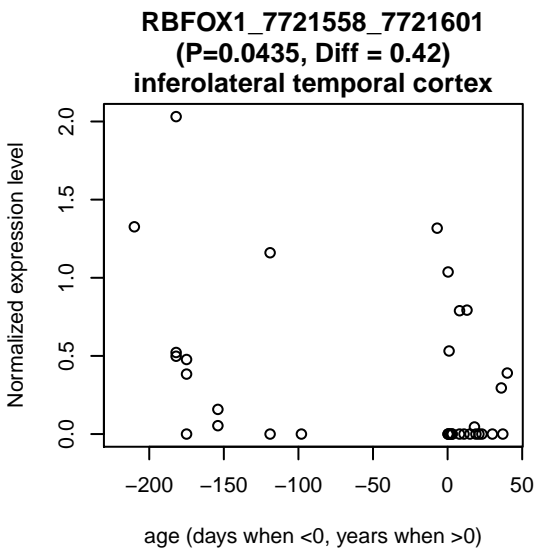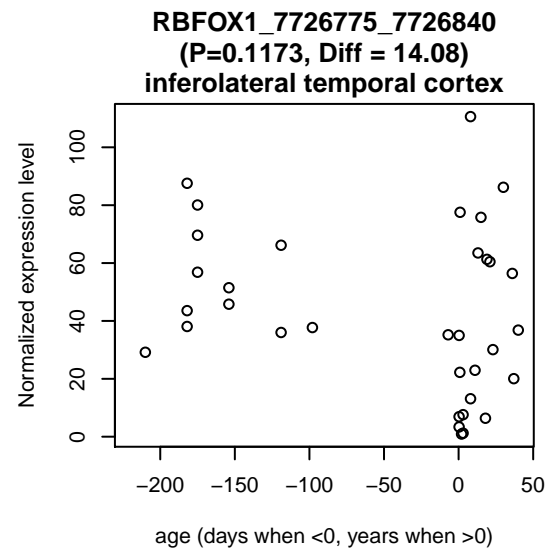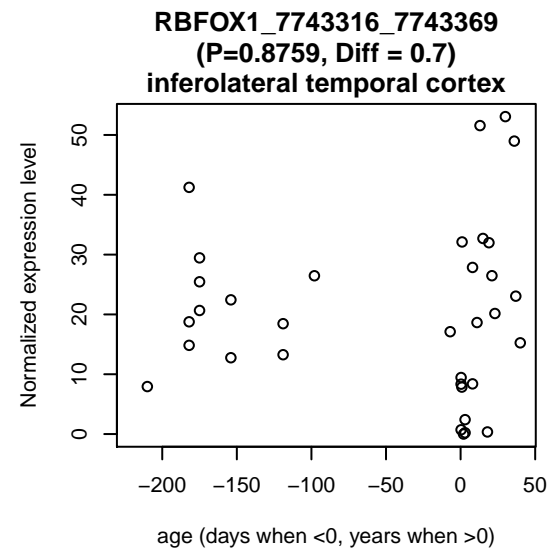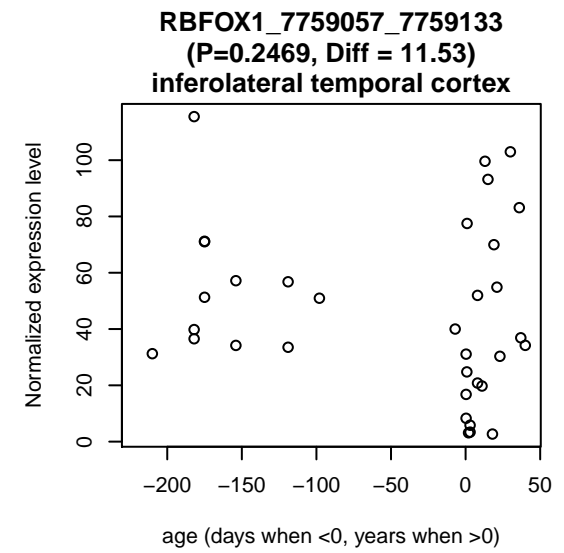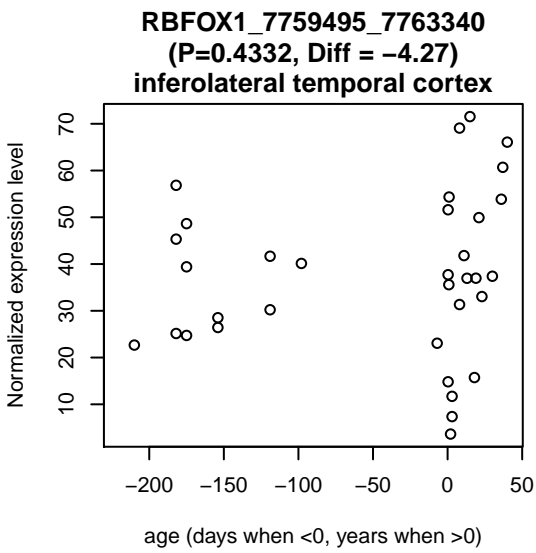



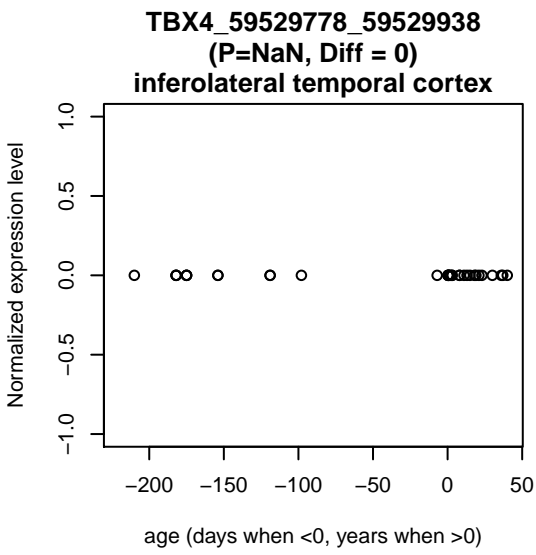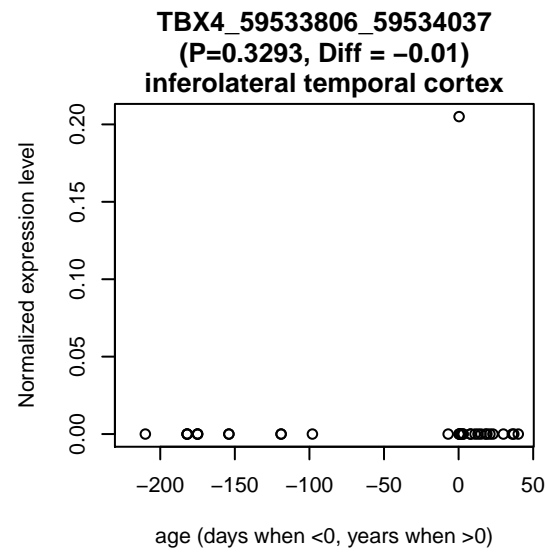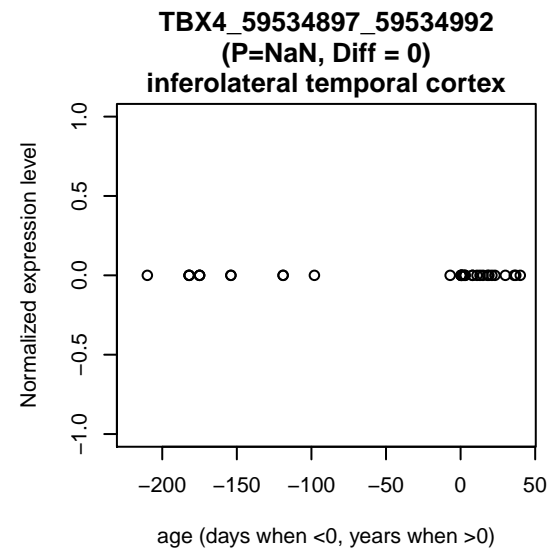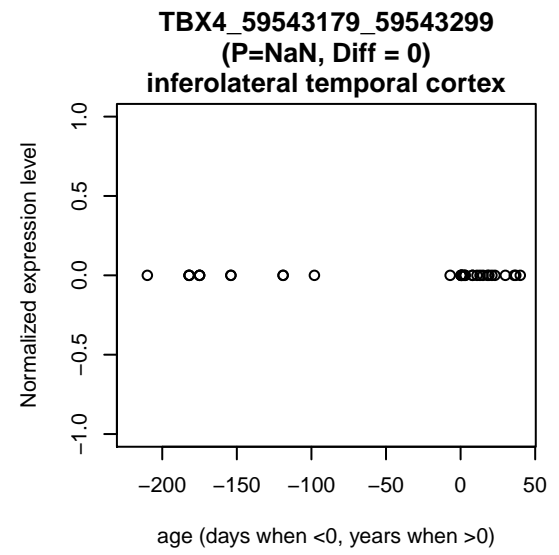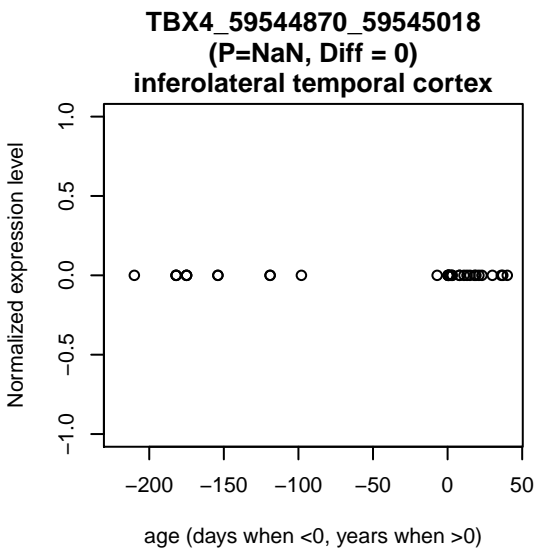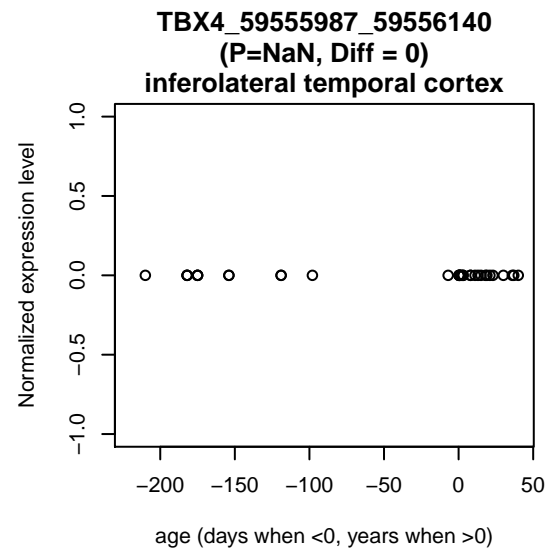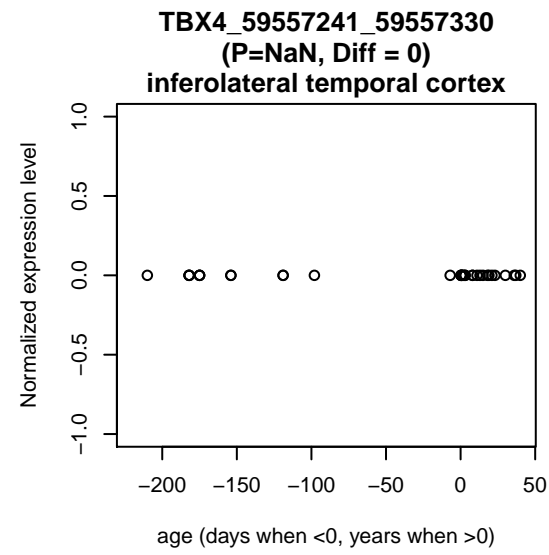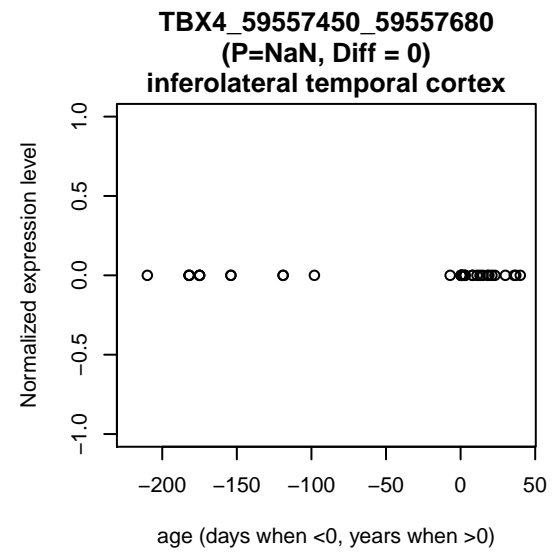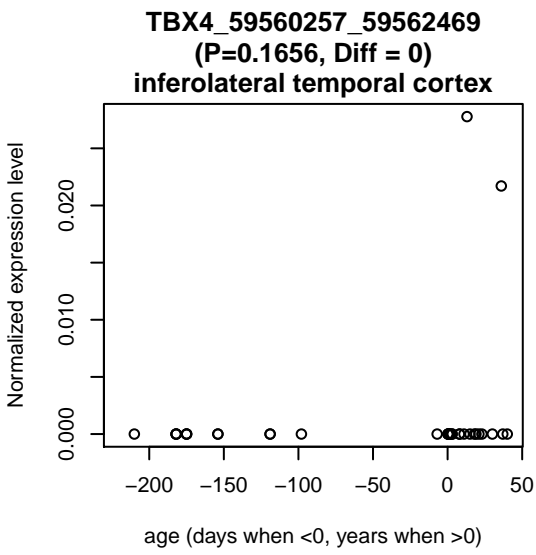

**FRG1\_190861942\_190862226**  
(P=0, Diff = 10.16)  
inferolateral temporal cortex

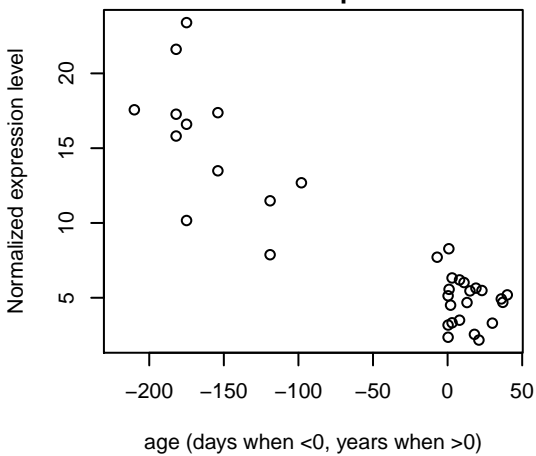

**FRG1\_190862987\_190863159**  
(P=0.4575, Diff = -0.01)  
inferolateral temporal cortex

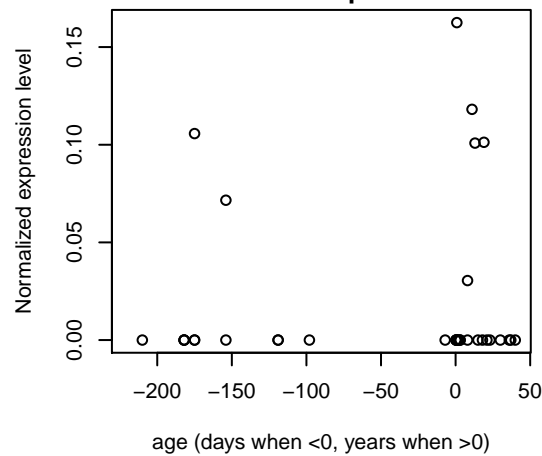

**FRG1\_190864356\_190864427**  
(P=0.0283, Diff = 6.74)  
inferolateral temporal cortex

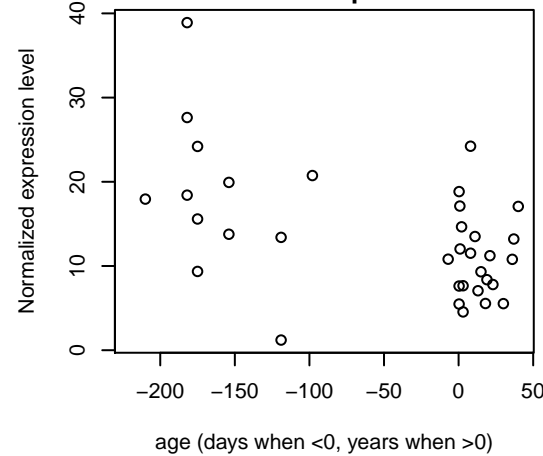

**FRG1\_190873316\_190873442**  
(P=0.0027, Diff = 17.75)  
inferolateral temporal cortex

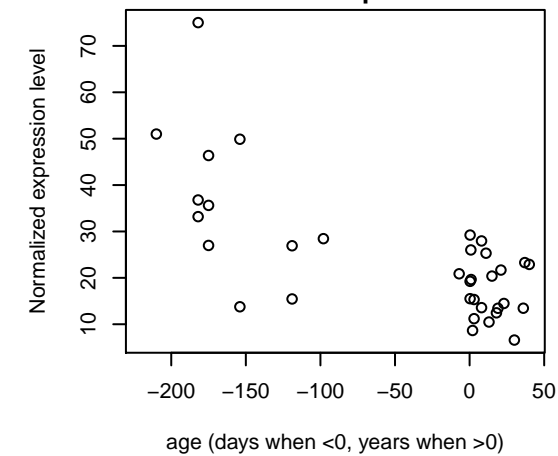

**FRG1\_190874222\_190874280**  
(P=0.0079, Diff = 10.8)  
inferolateral temporal cortex

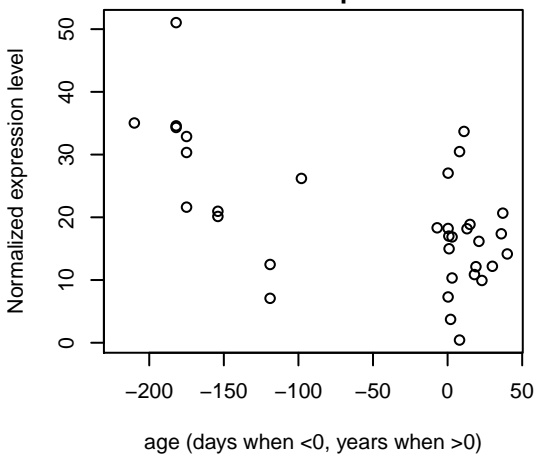

**FRG1\_190876191\_190876306**  
(P=0.0328, Diff = 8.16)  
inferolateral temporal cortex

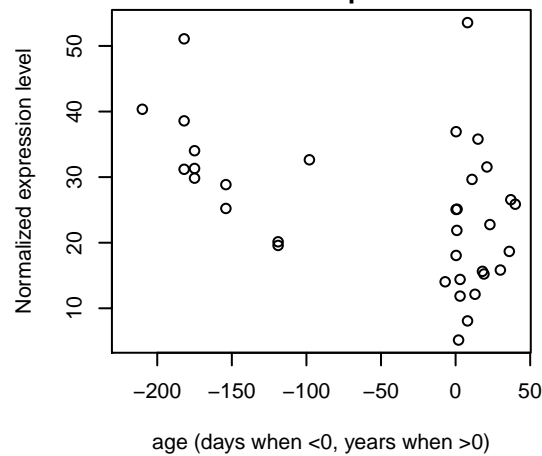

**FRG1\_190878552\_190878657**  
(P=0.7126, Diff = 0.84)  
inferolateral temporal cortex

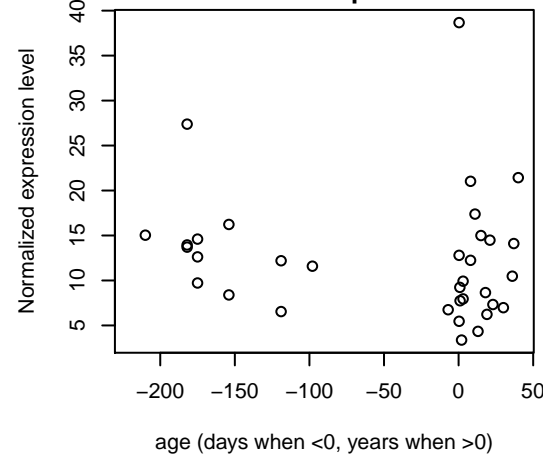

**FRG1\_190881902\_190881994**  
(P=0.739, Diff = 0.81)  
inferolateral temporal cortex

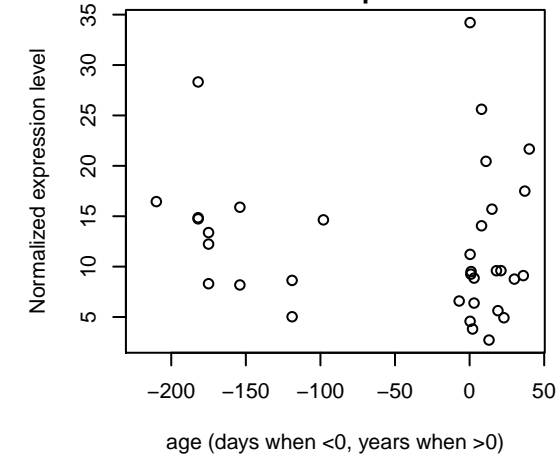

**FRG1\_190882016\_190882355**  
(P=0.3925, Diff = -0.1)  
inferolateral temporal cortex

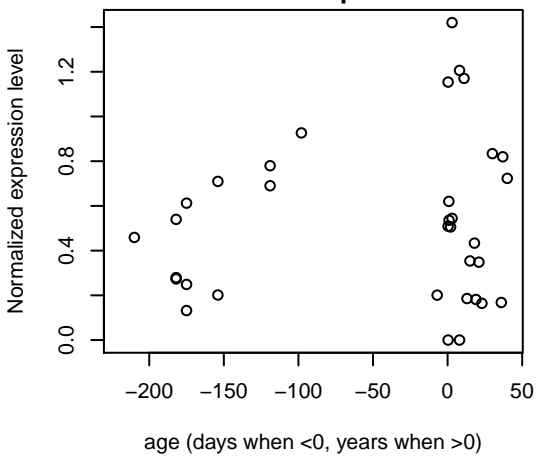

**FRG1\_190882583\_190882705**  
(P=0.7818, Diff = 0.03)  
inferolateral temporal cortex

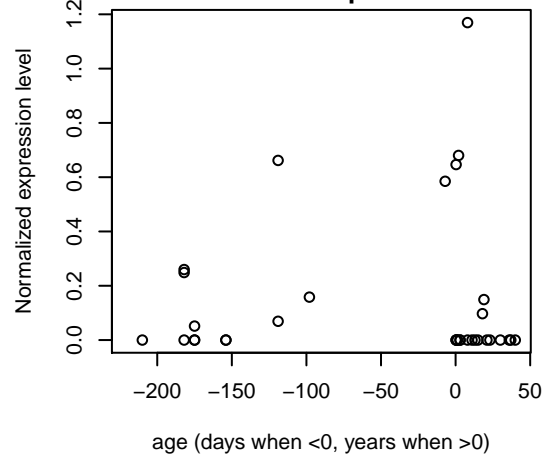

**FRG1\_190882976\_190883087**  
(P=0.2663, Diff = 7.04)  
inferolateral temporal cortex

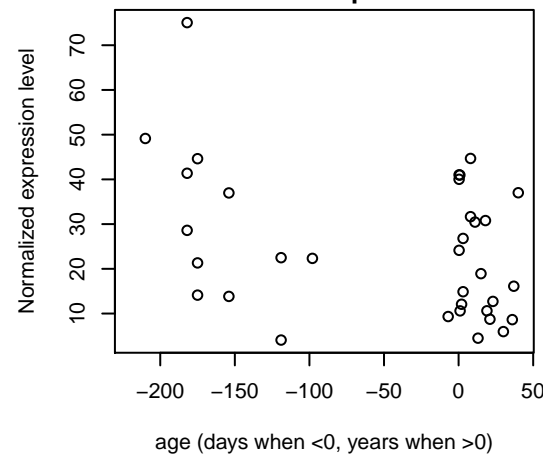

**FRG1\_190884247\_190884359**  
(P=0.7516, Diff = 0.75)  
inferolateral temporal cortex

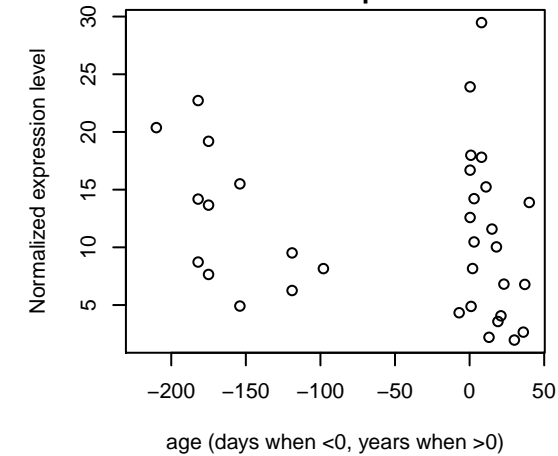

**METTL4\_2537523\_2539144**  
( $P=0.0902$ , Diff =  $-0.59$ )  
inferolateral temporal cortex

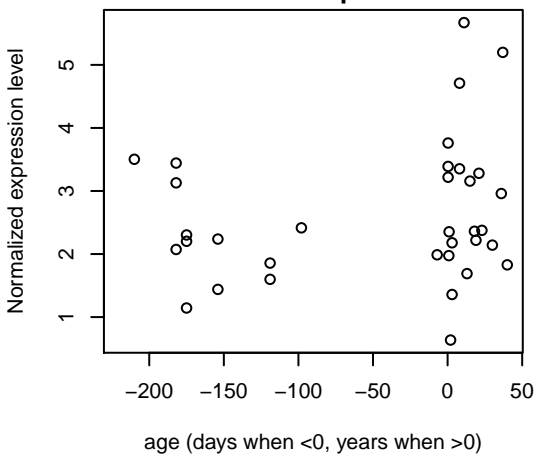

**METTL4\_2544193\_2544285**  
( $P=0.9684$ , Diff =  $0.02$ )  
inferolateral temporal cortex

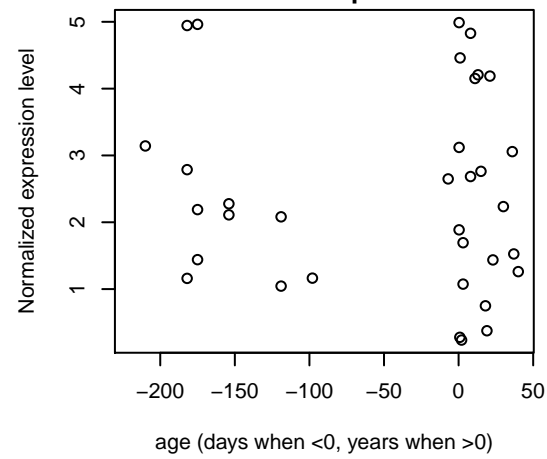

**METTL4\_2544651\_2544758**  
( $P=0.3121$ , Diff =  $0.57$ )  
inferolateral temporal cortex

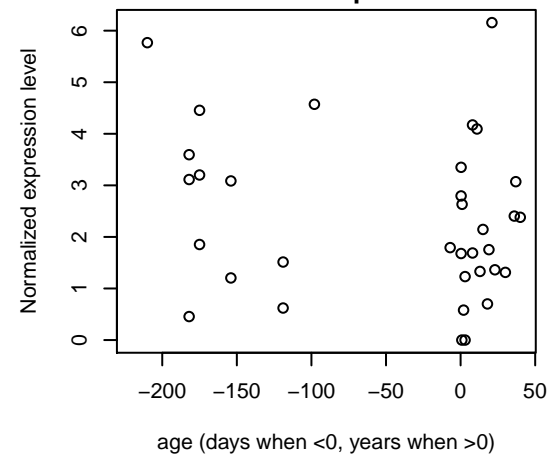

**METTL4\_2547353\_2547528**  
( $P=0.371$ , Diff =  $0.53$ )  
inferolateral temporal cortex

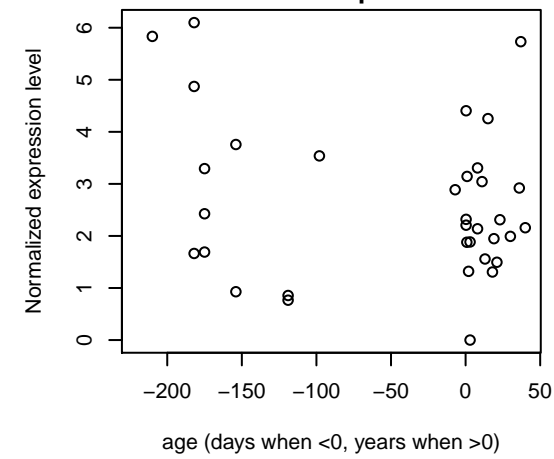

**METTL4\_2552693\_2552763**  
( $P=0.2404$ , Diff =  $0.58$ )  
inferolateral temporal cortex

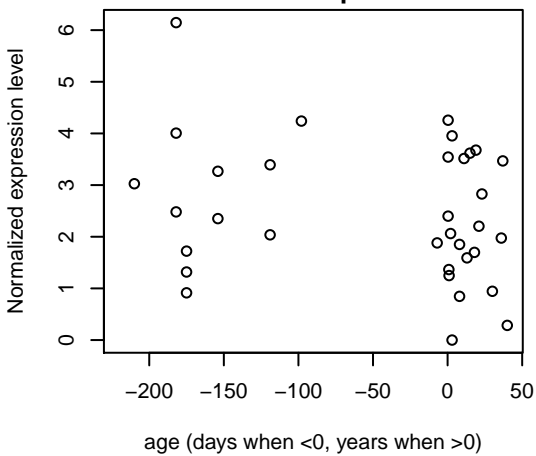

**METTL4\_2554667\_2555037**  
( $P=0.323$ , Diff =  $0.45$ )  
inferolateral temporal cortex

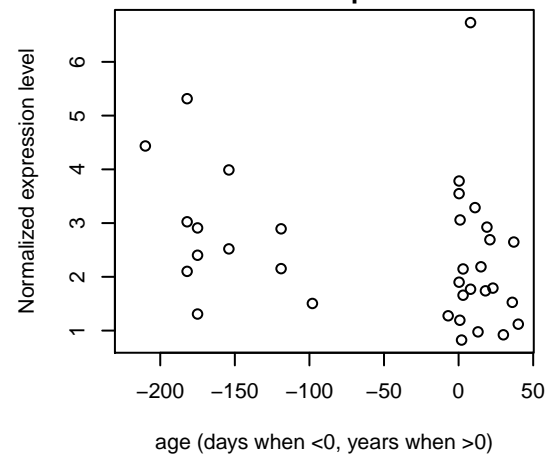

**METTL4\_2563795\_2563858**  
( $P=0.1815$ , Diff =  $0.73$ )  
inferolateral temporal cortex

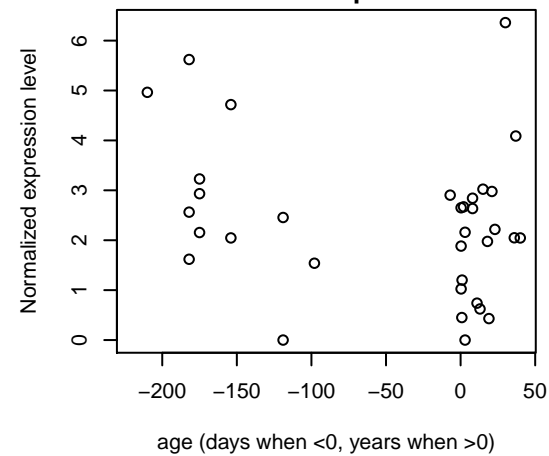

**METTL4\_2566819\_2567653**  
( $P=0.0125$ , Diff =  $0.96$ )  
inferolateral temporal cortex

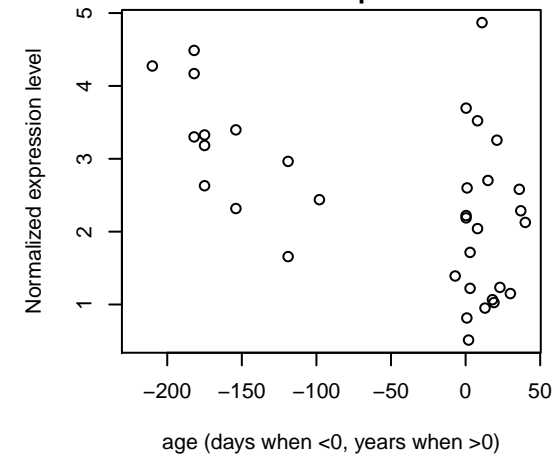

**METTL4\_2571147\_2571508**  
( $P=7e-04$ , Diff =  $1.12$ )  
inferolateral temporal cortex

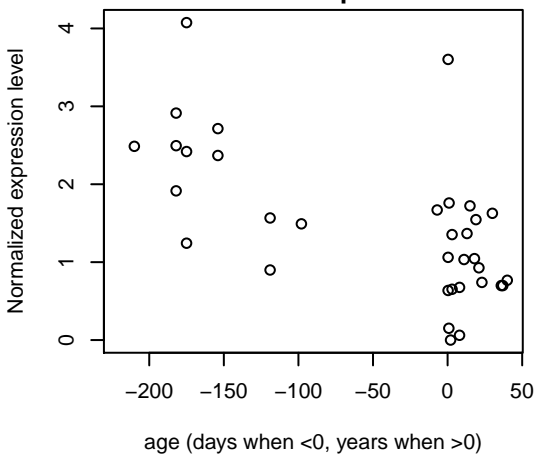

**C7orf11\_40172341\_40172858**  
(P=0.1253, Diff = 3.52)  
inferolateral temporal cortex

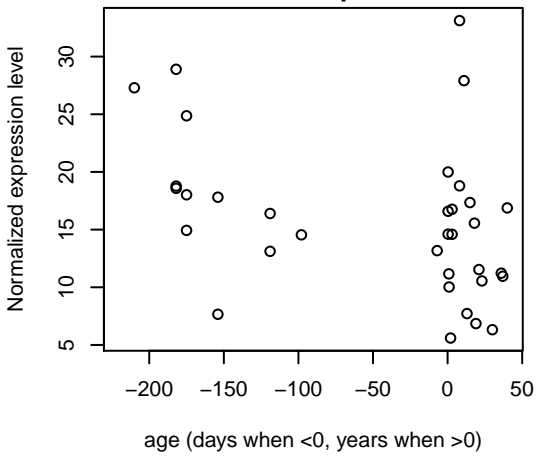

**C7orf11\_40173827\_40174258**  
(P=0.003, Diff = 8.9)  
inferolateral temporal cortex

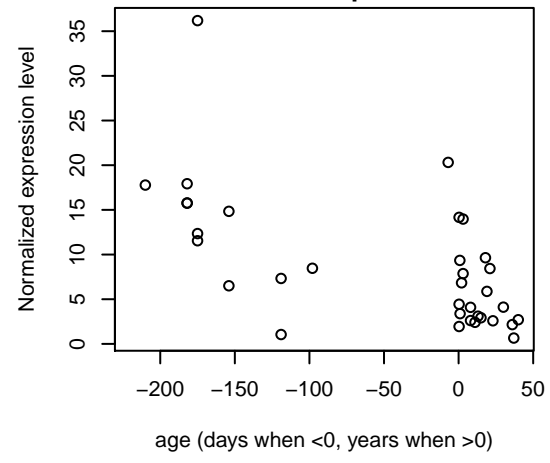

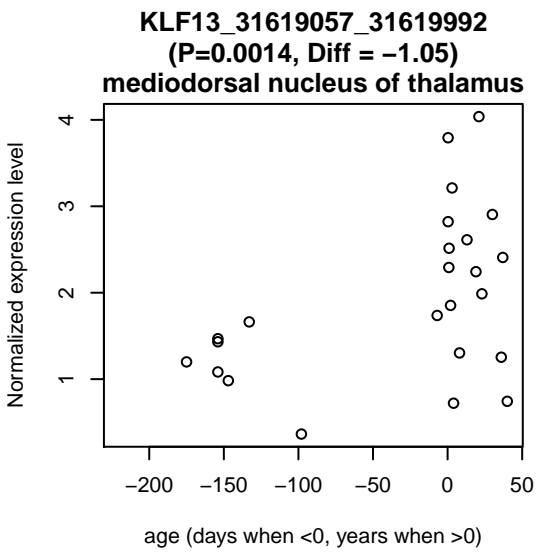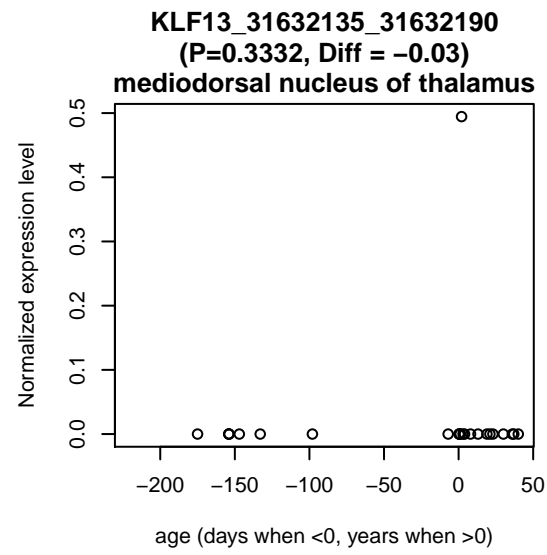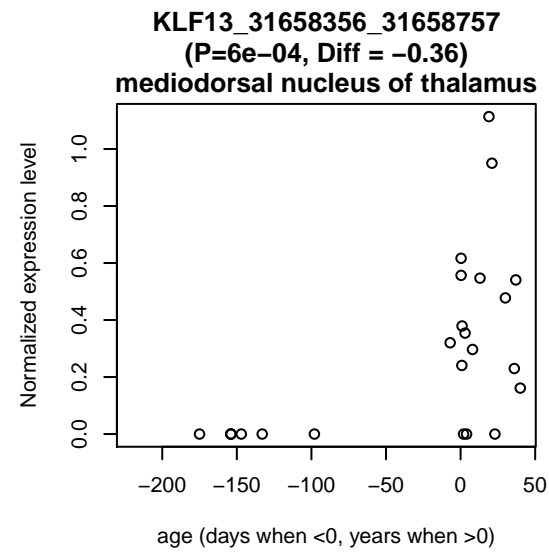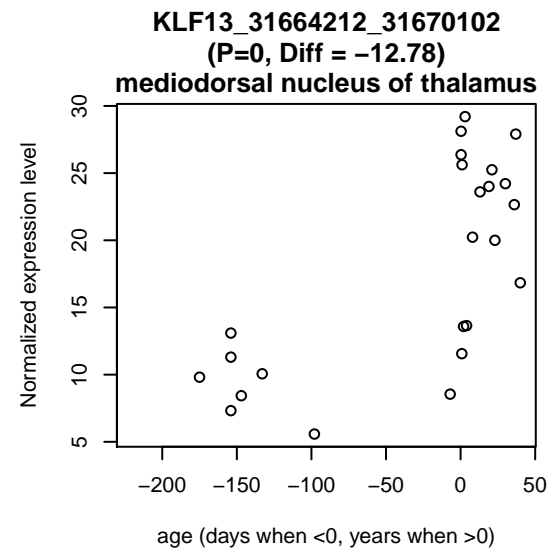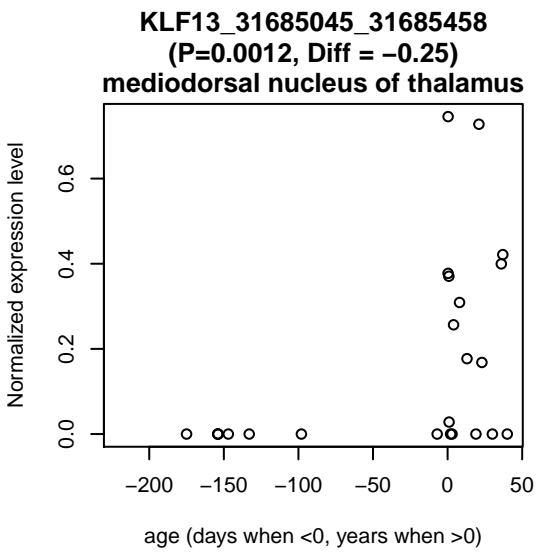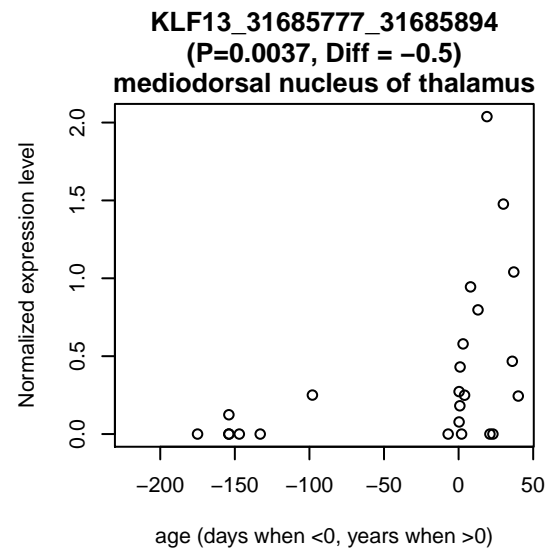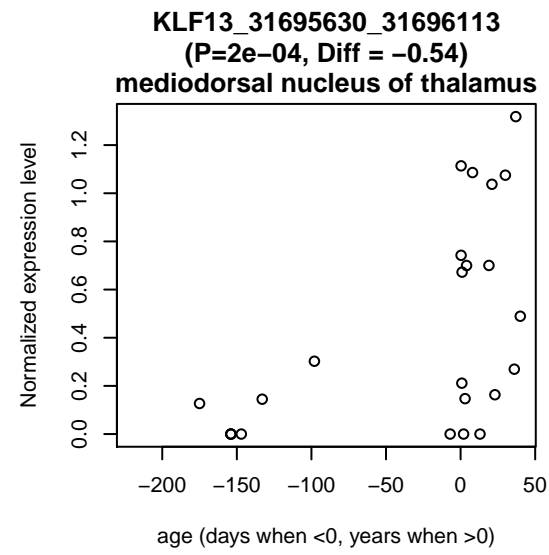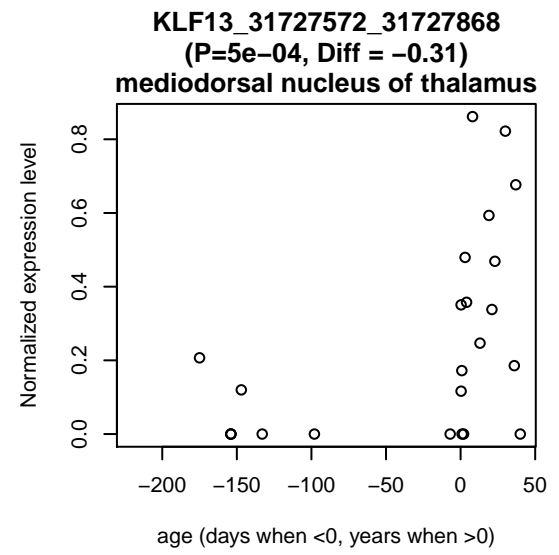

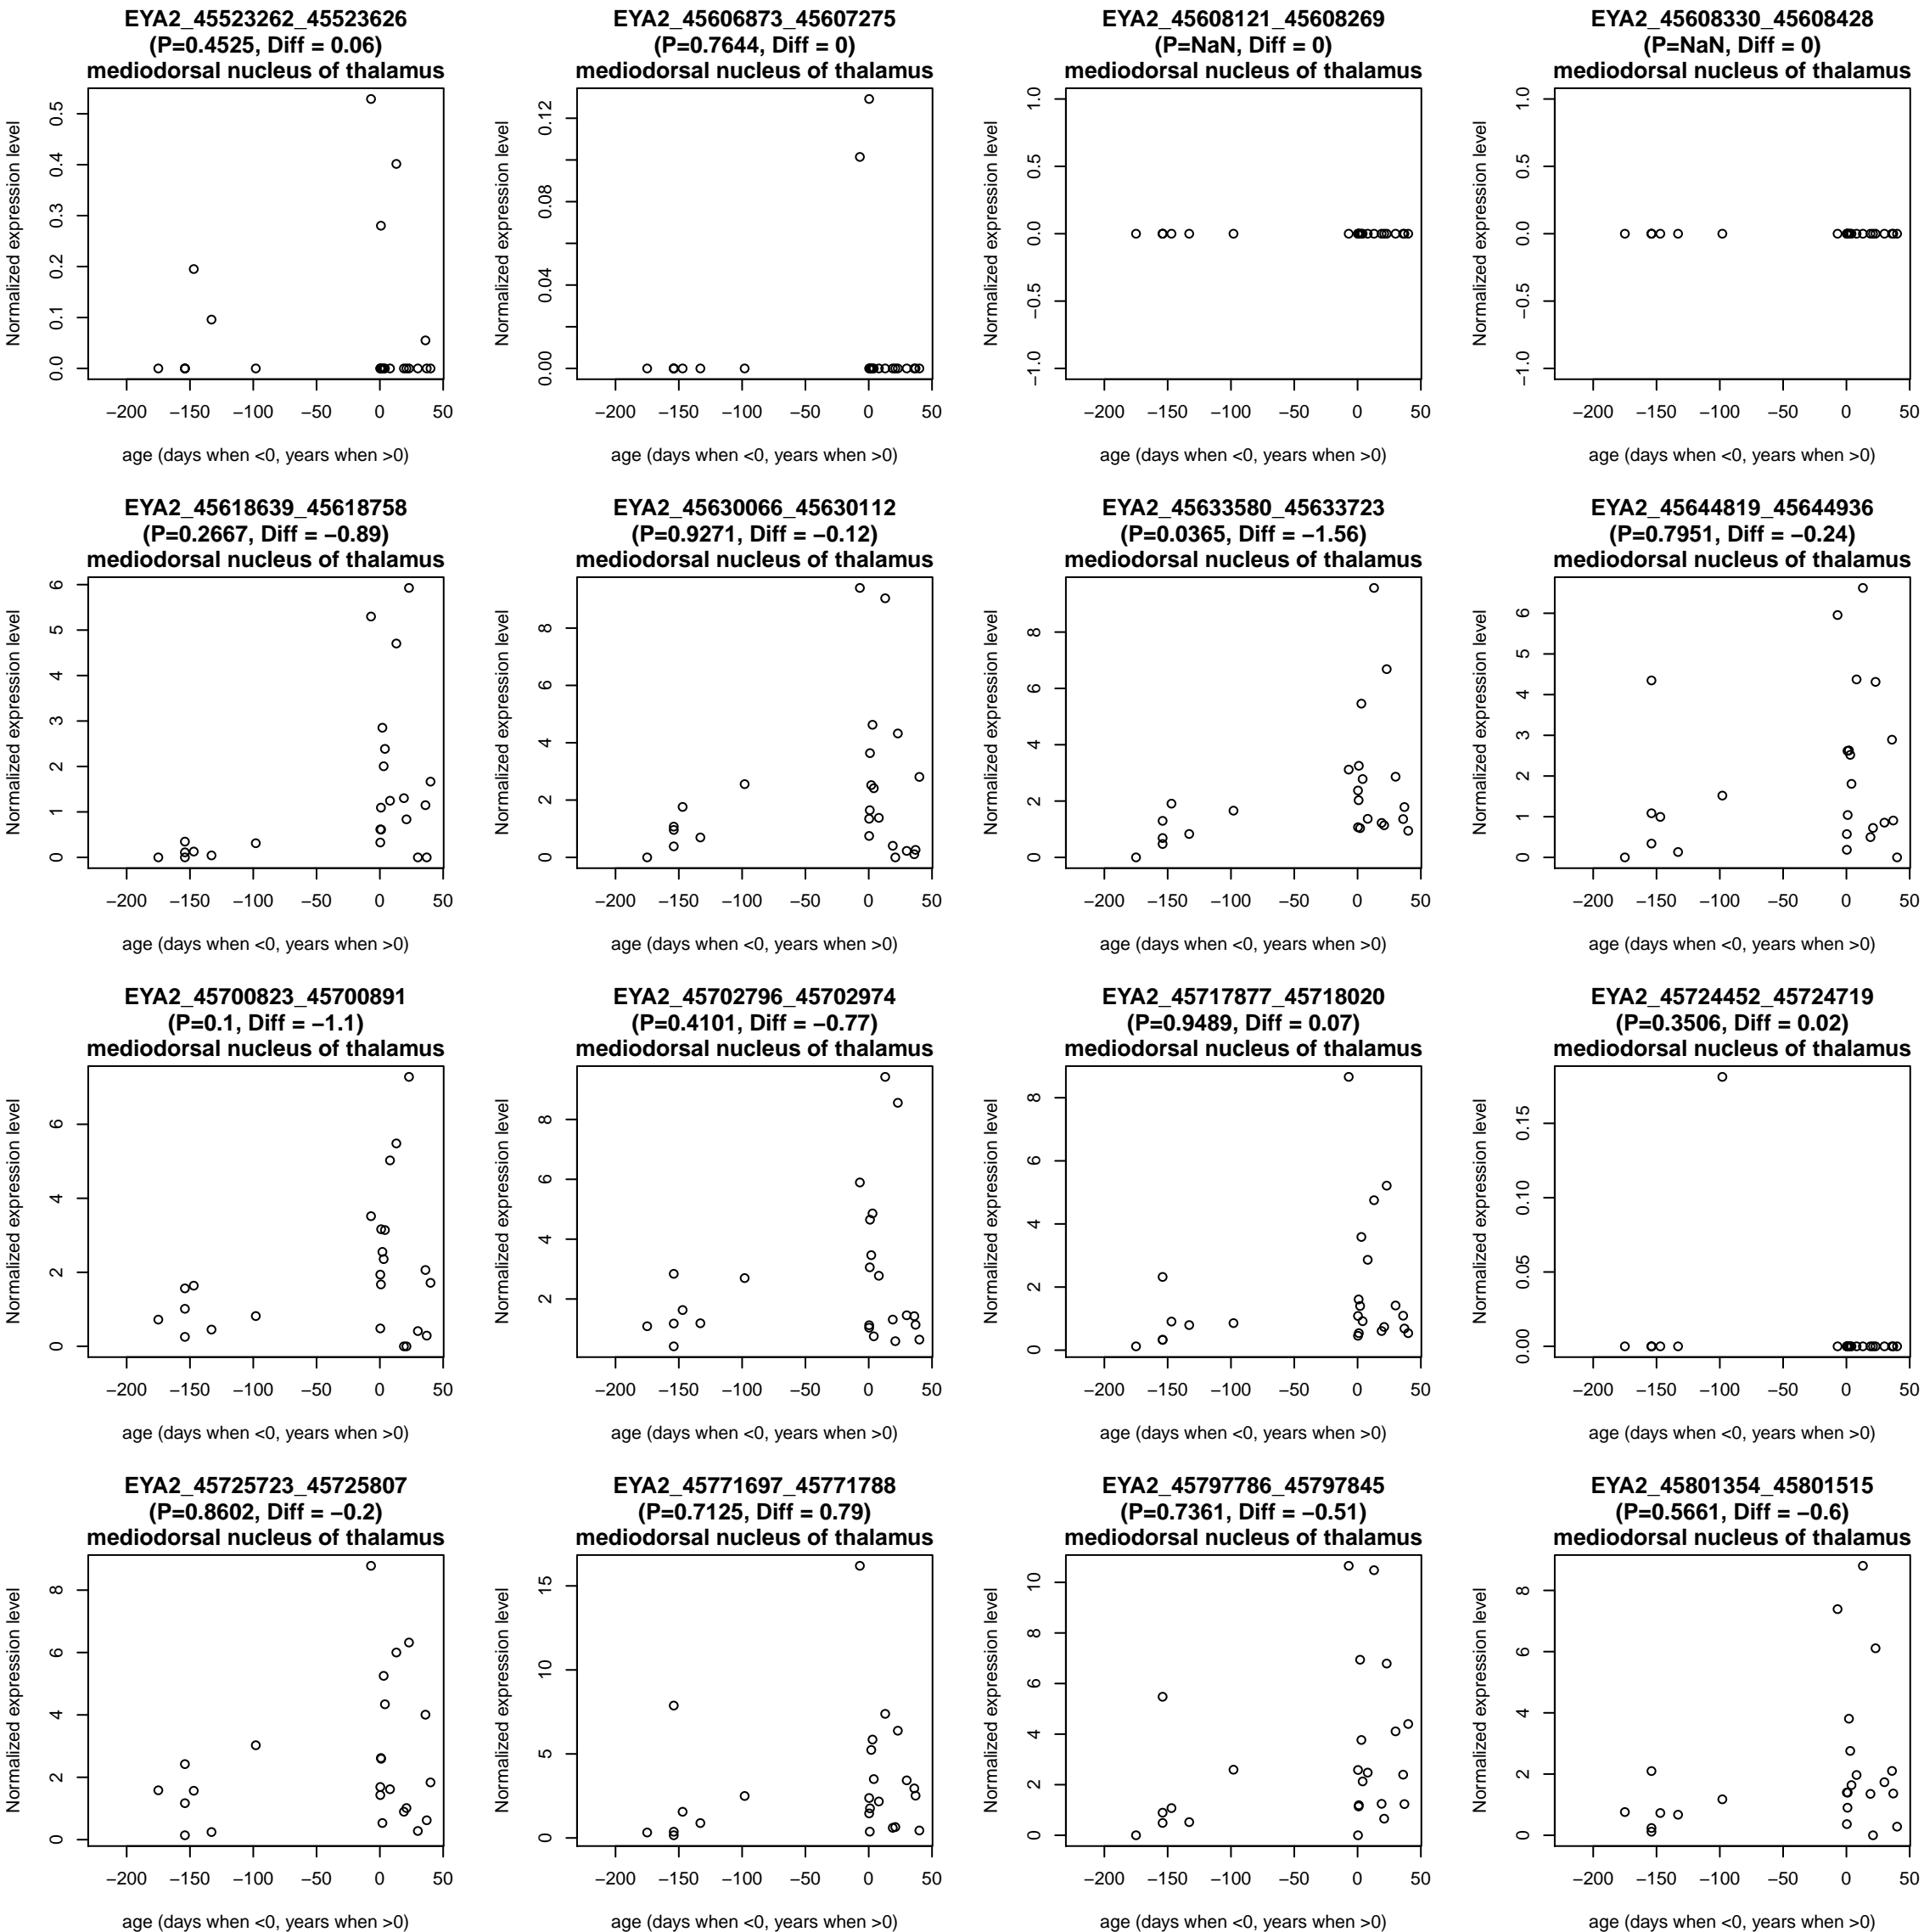

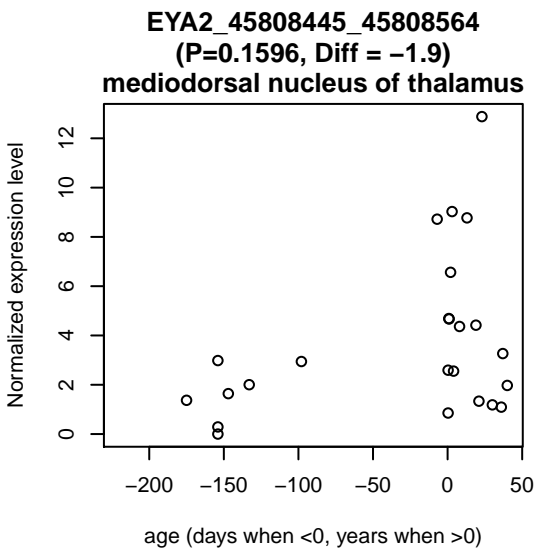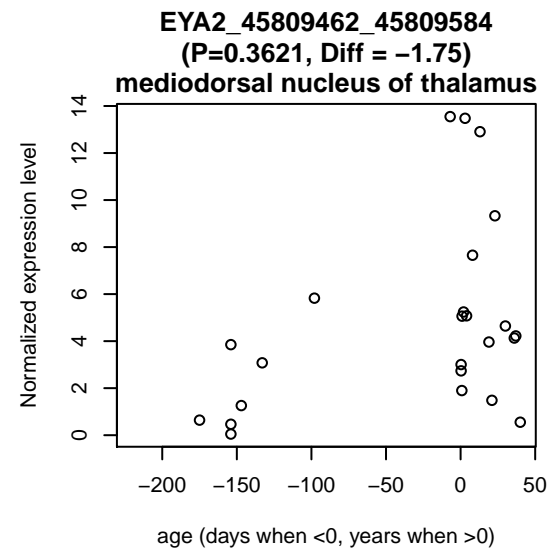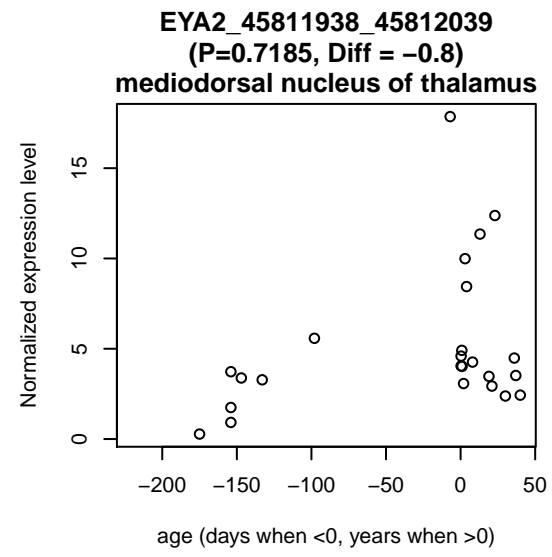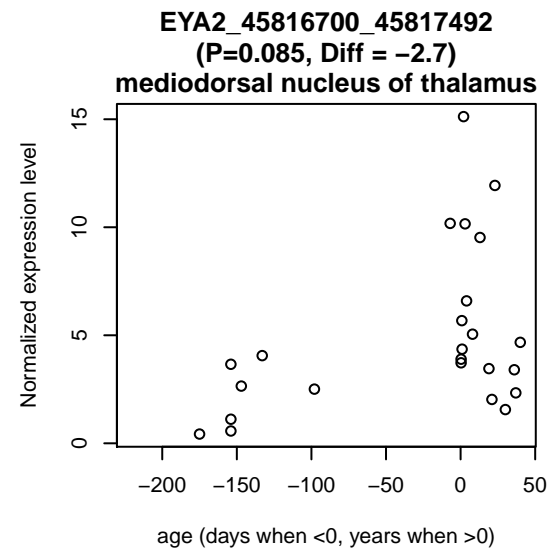

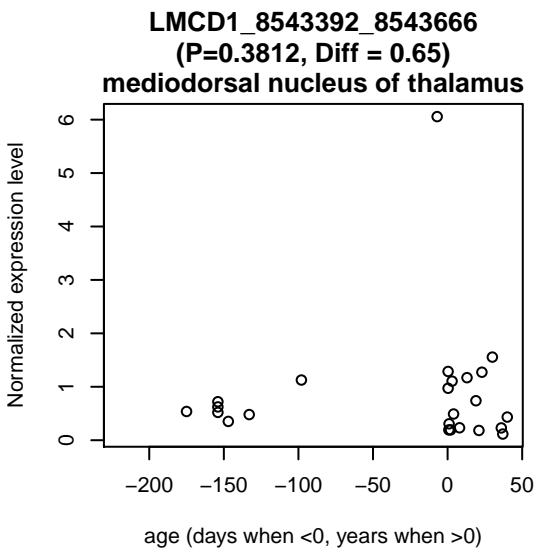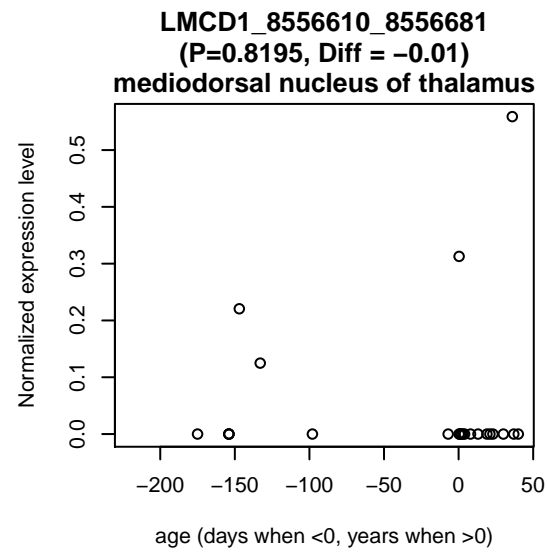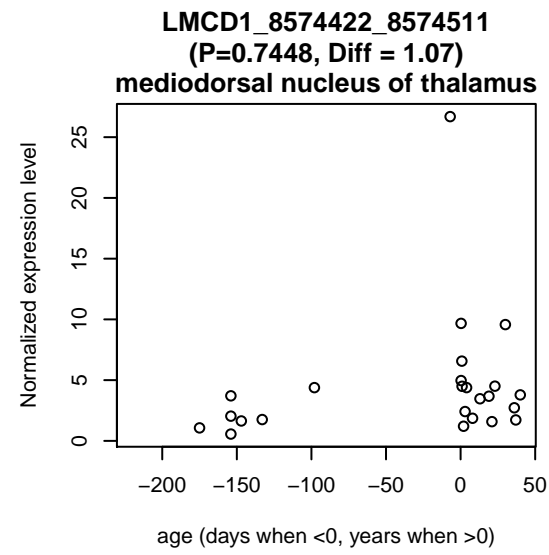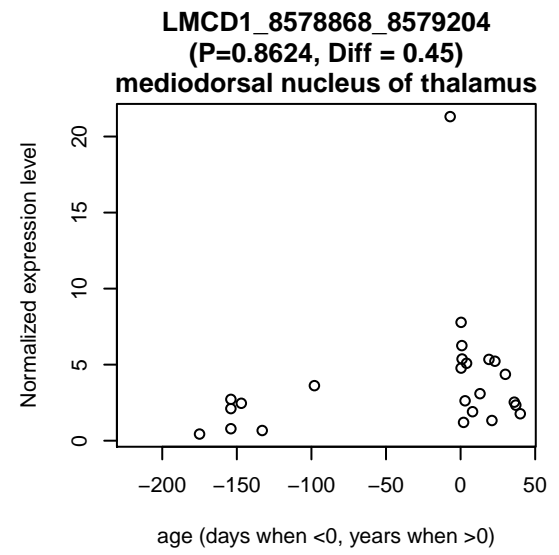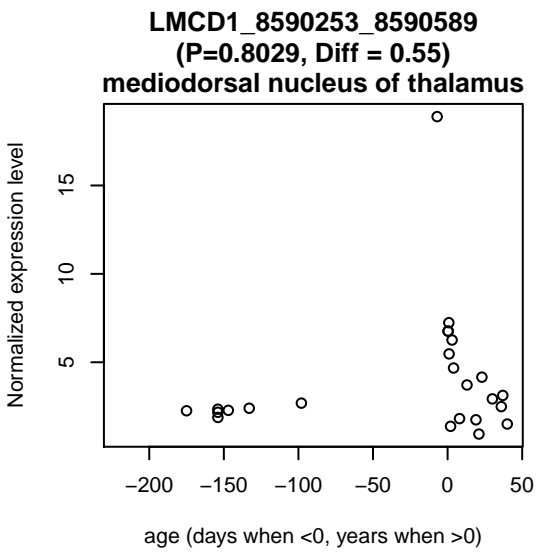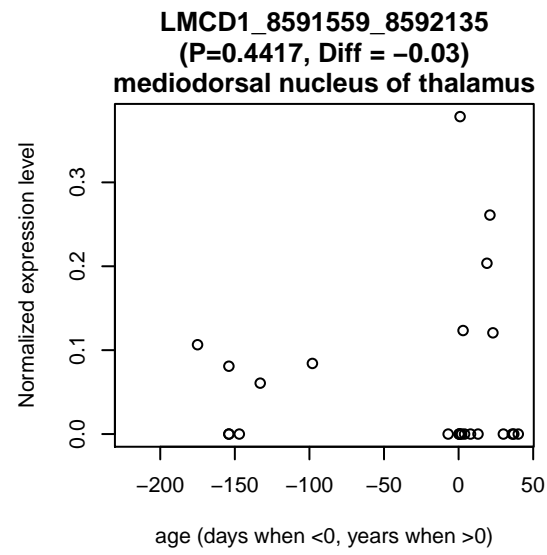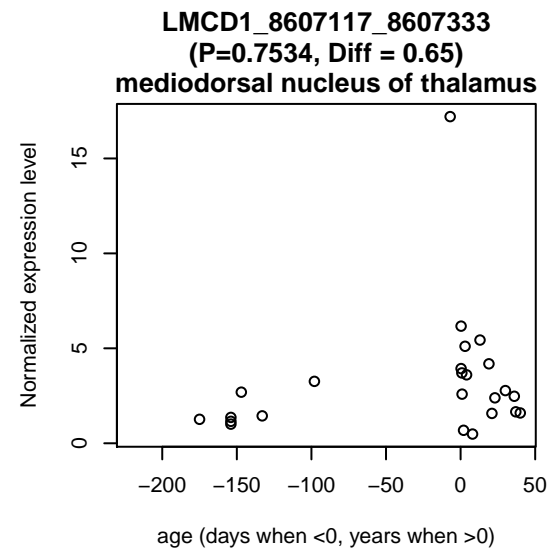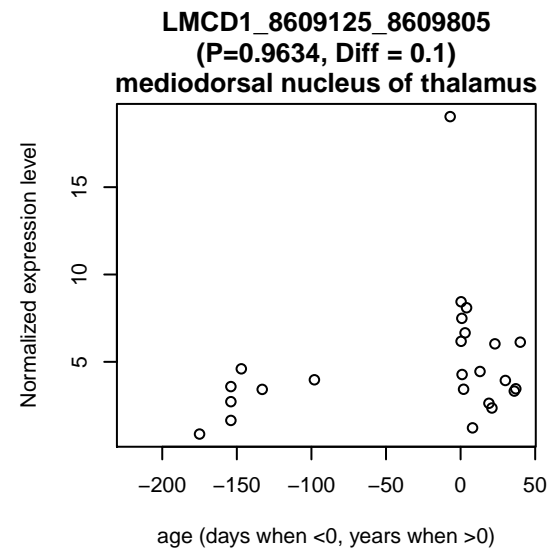



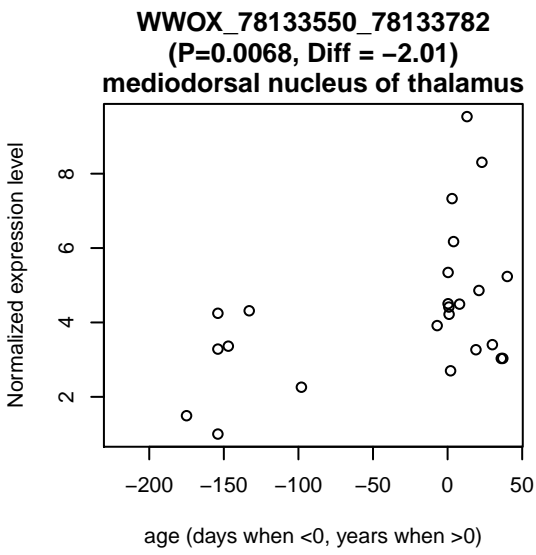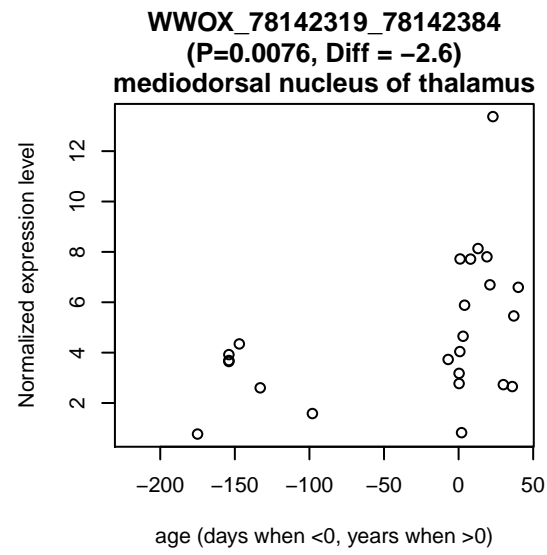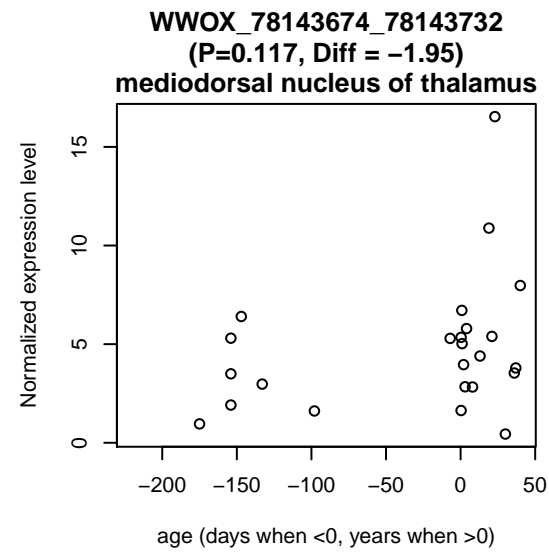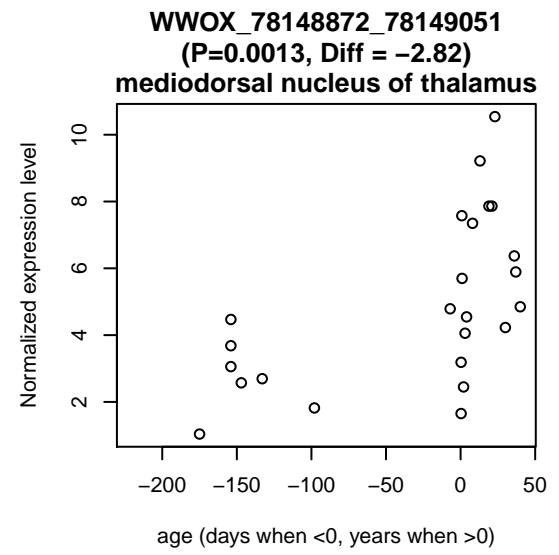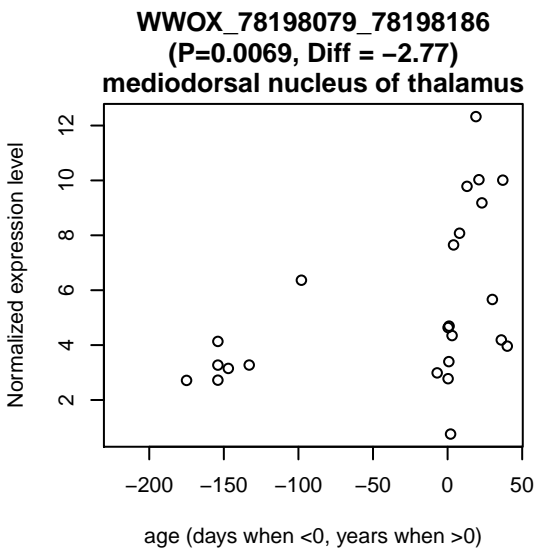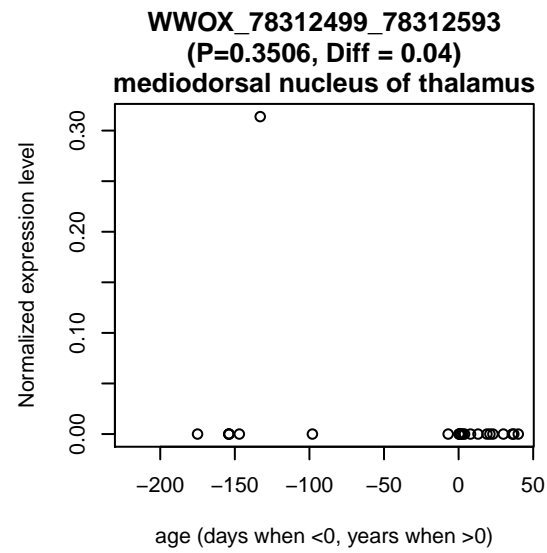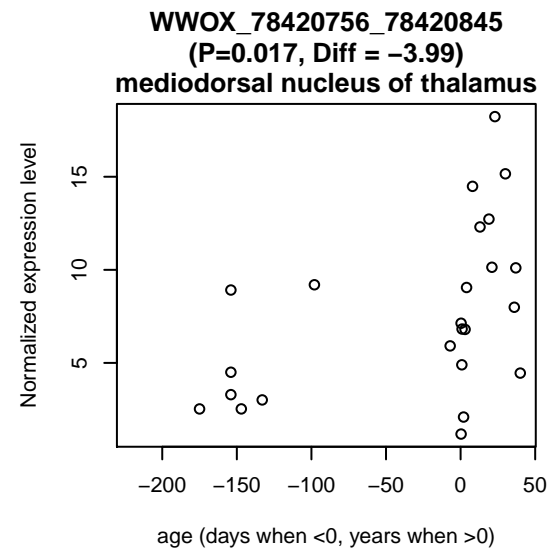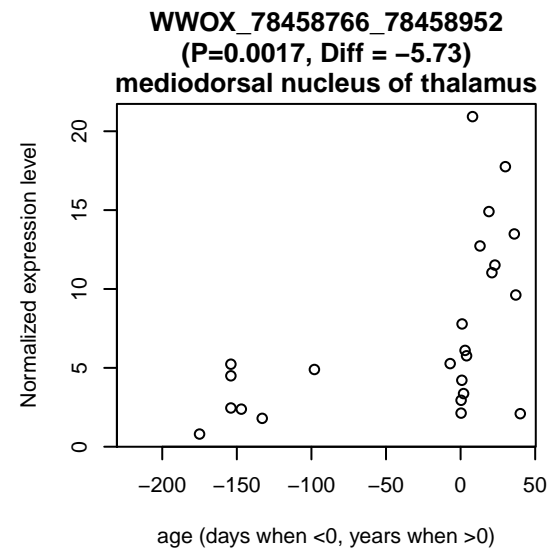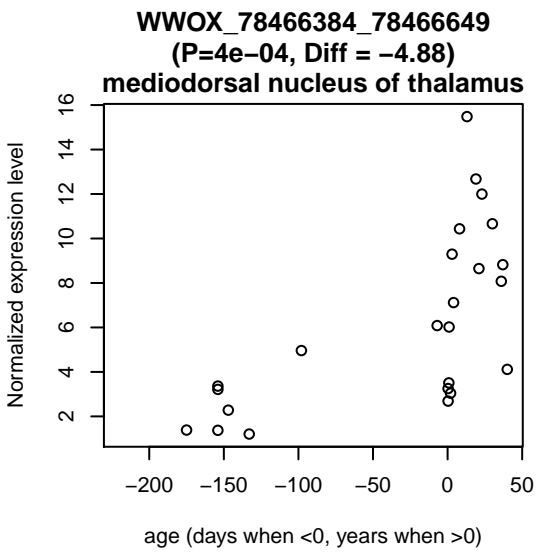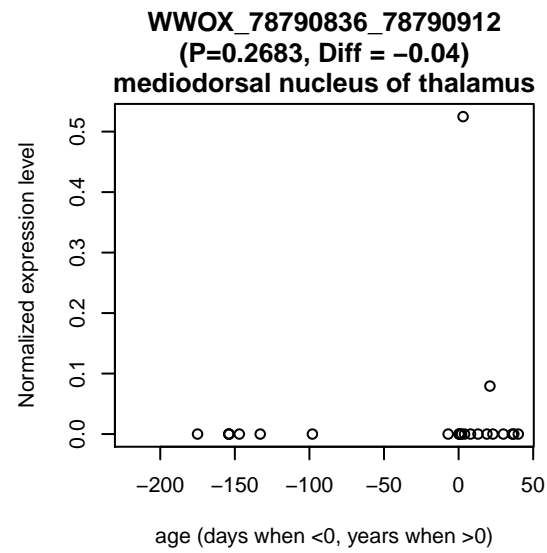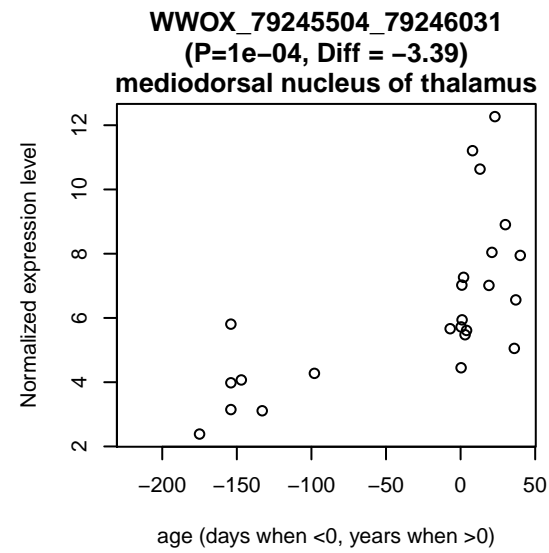

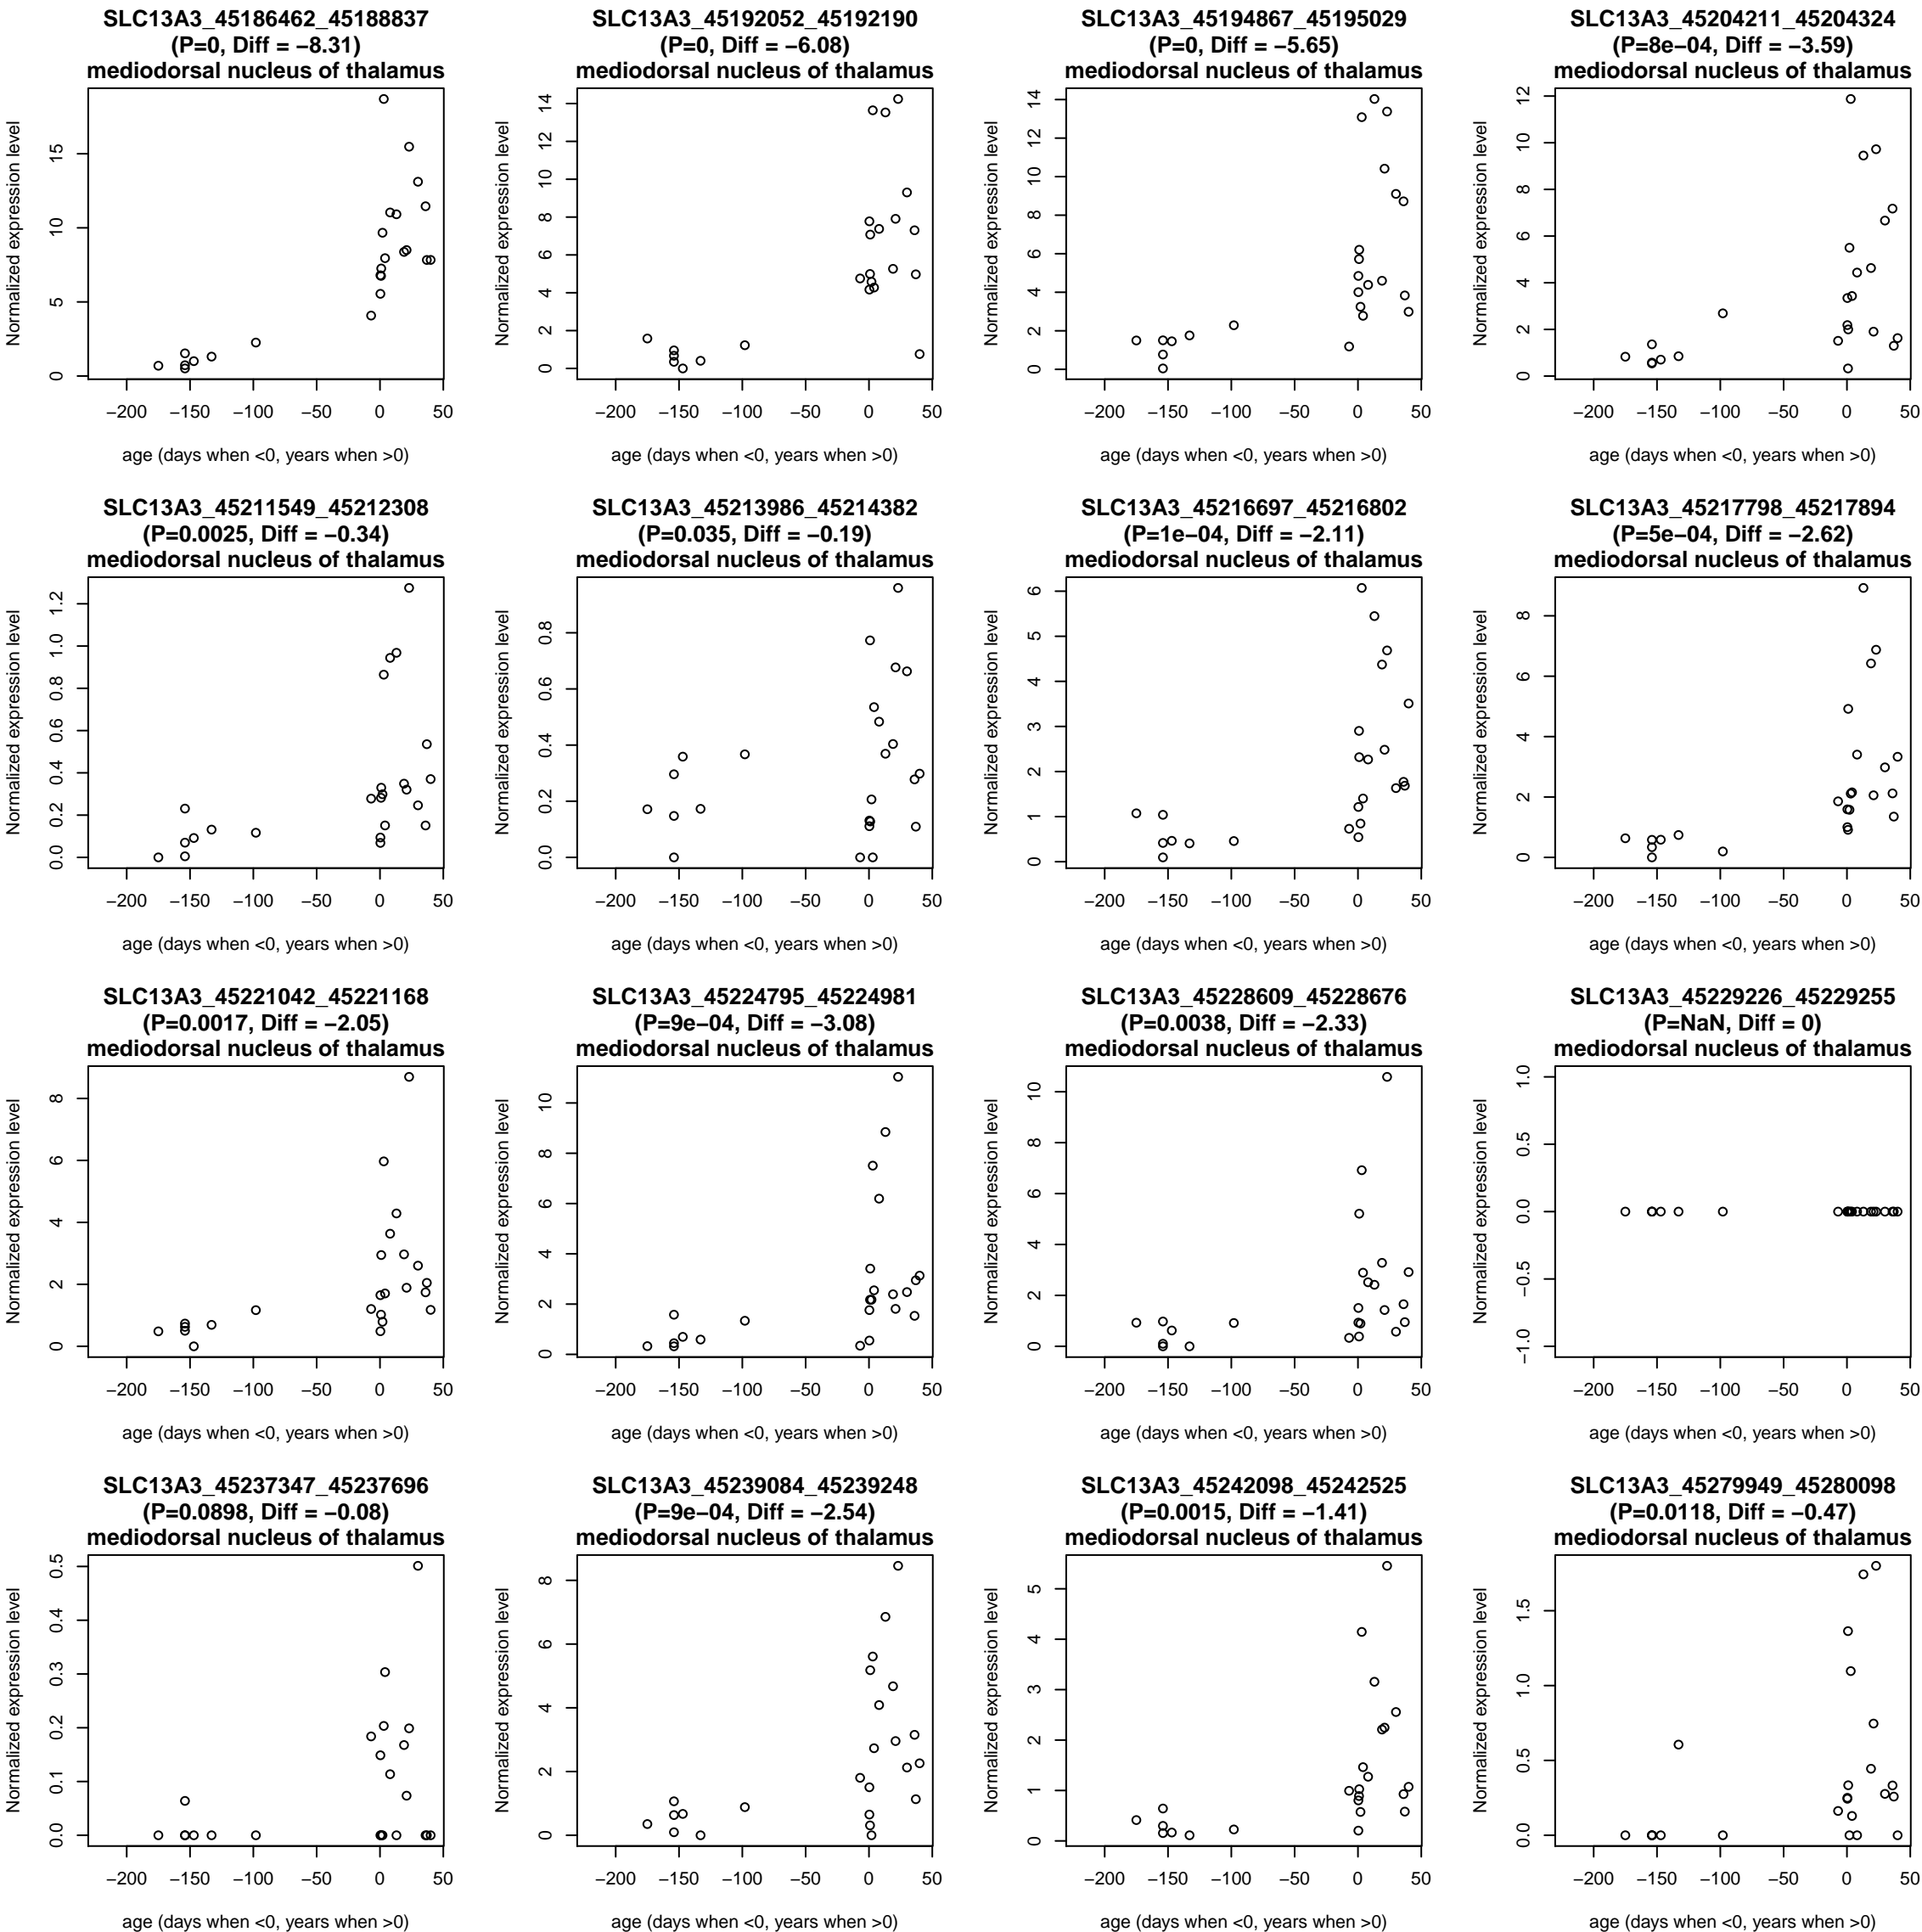

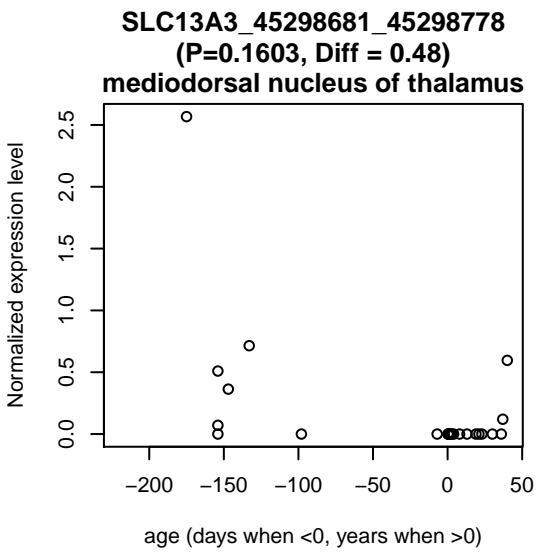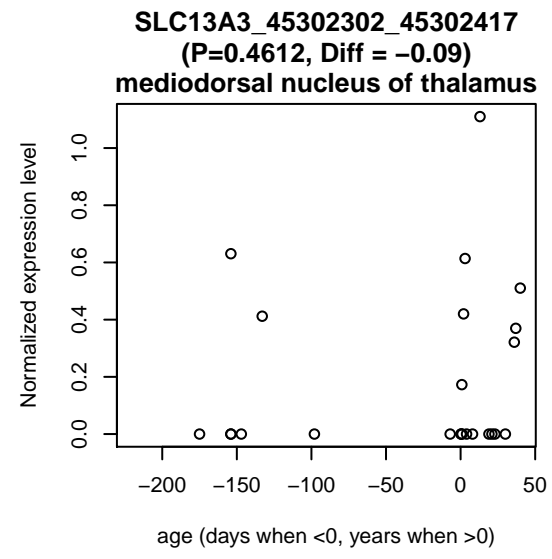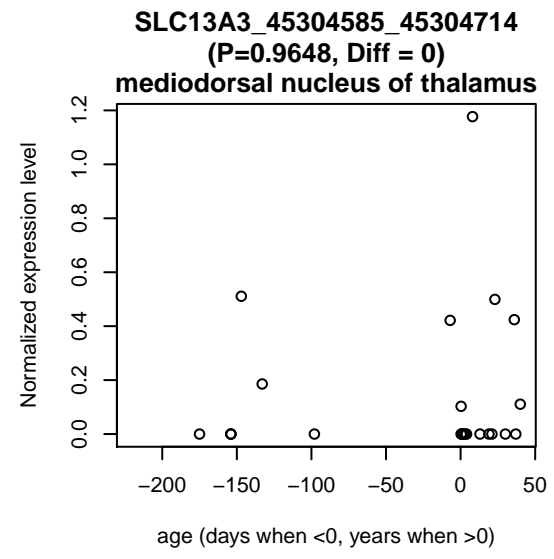

HTR1B\_78171947\_78173490

(P=0.1574, Diff = -0.61)

mediodorsal nucleus of thalamus

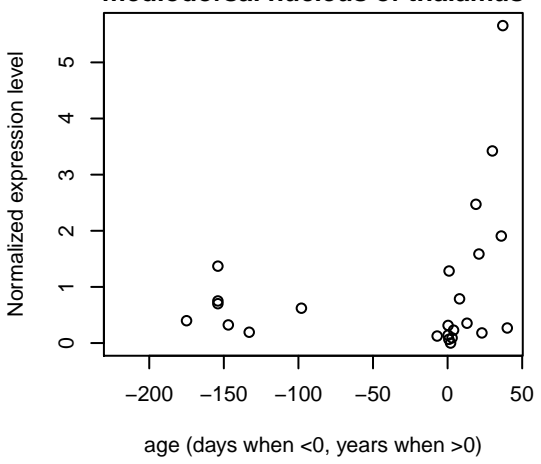

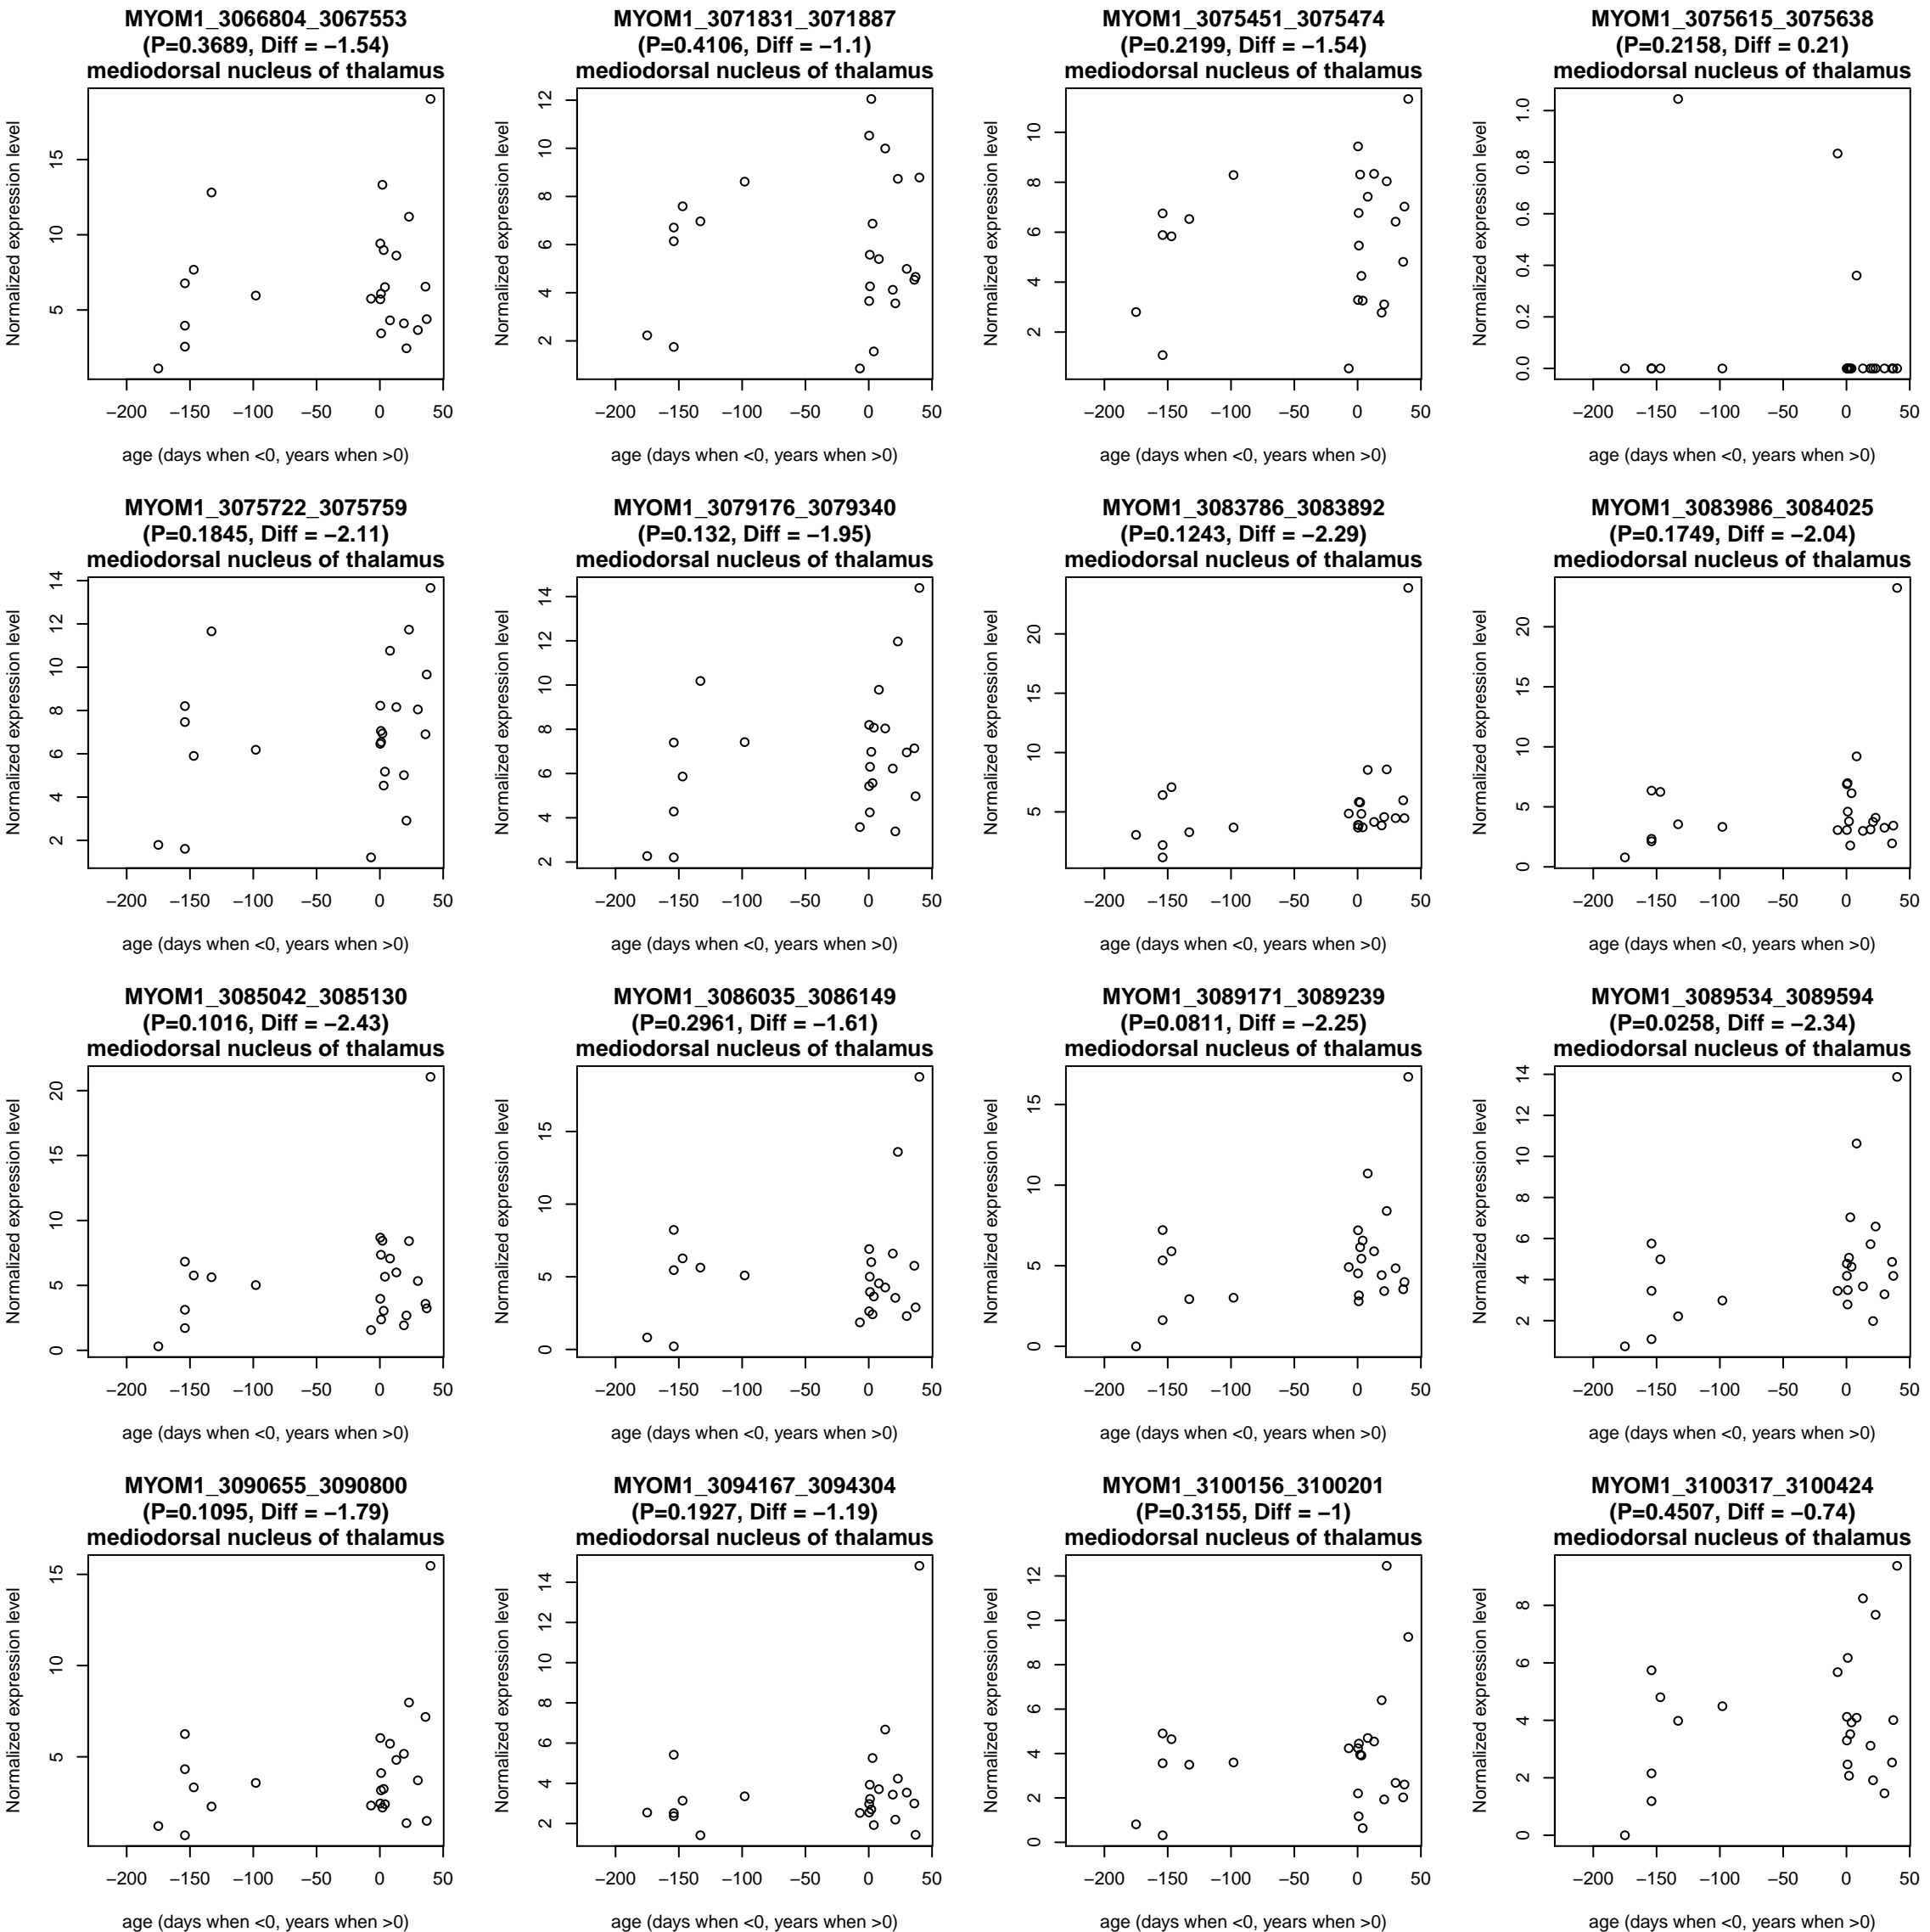

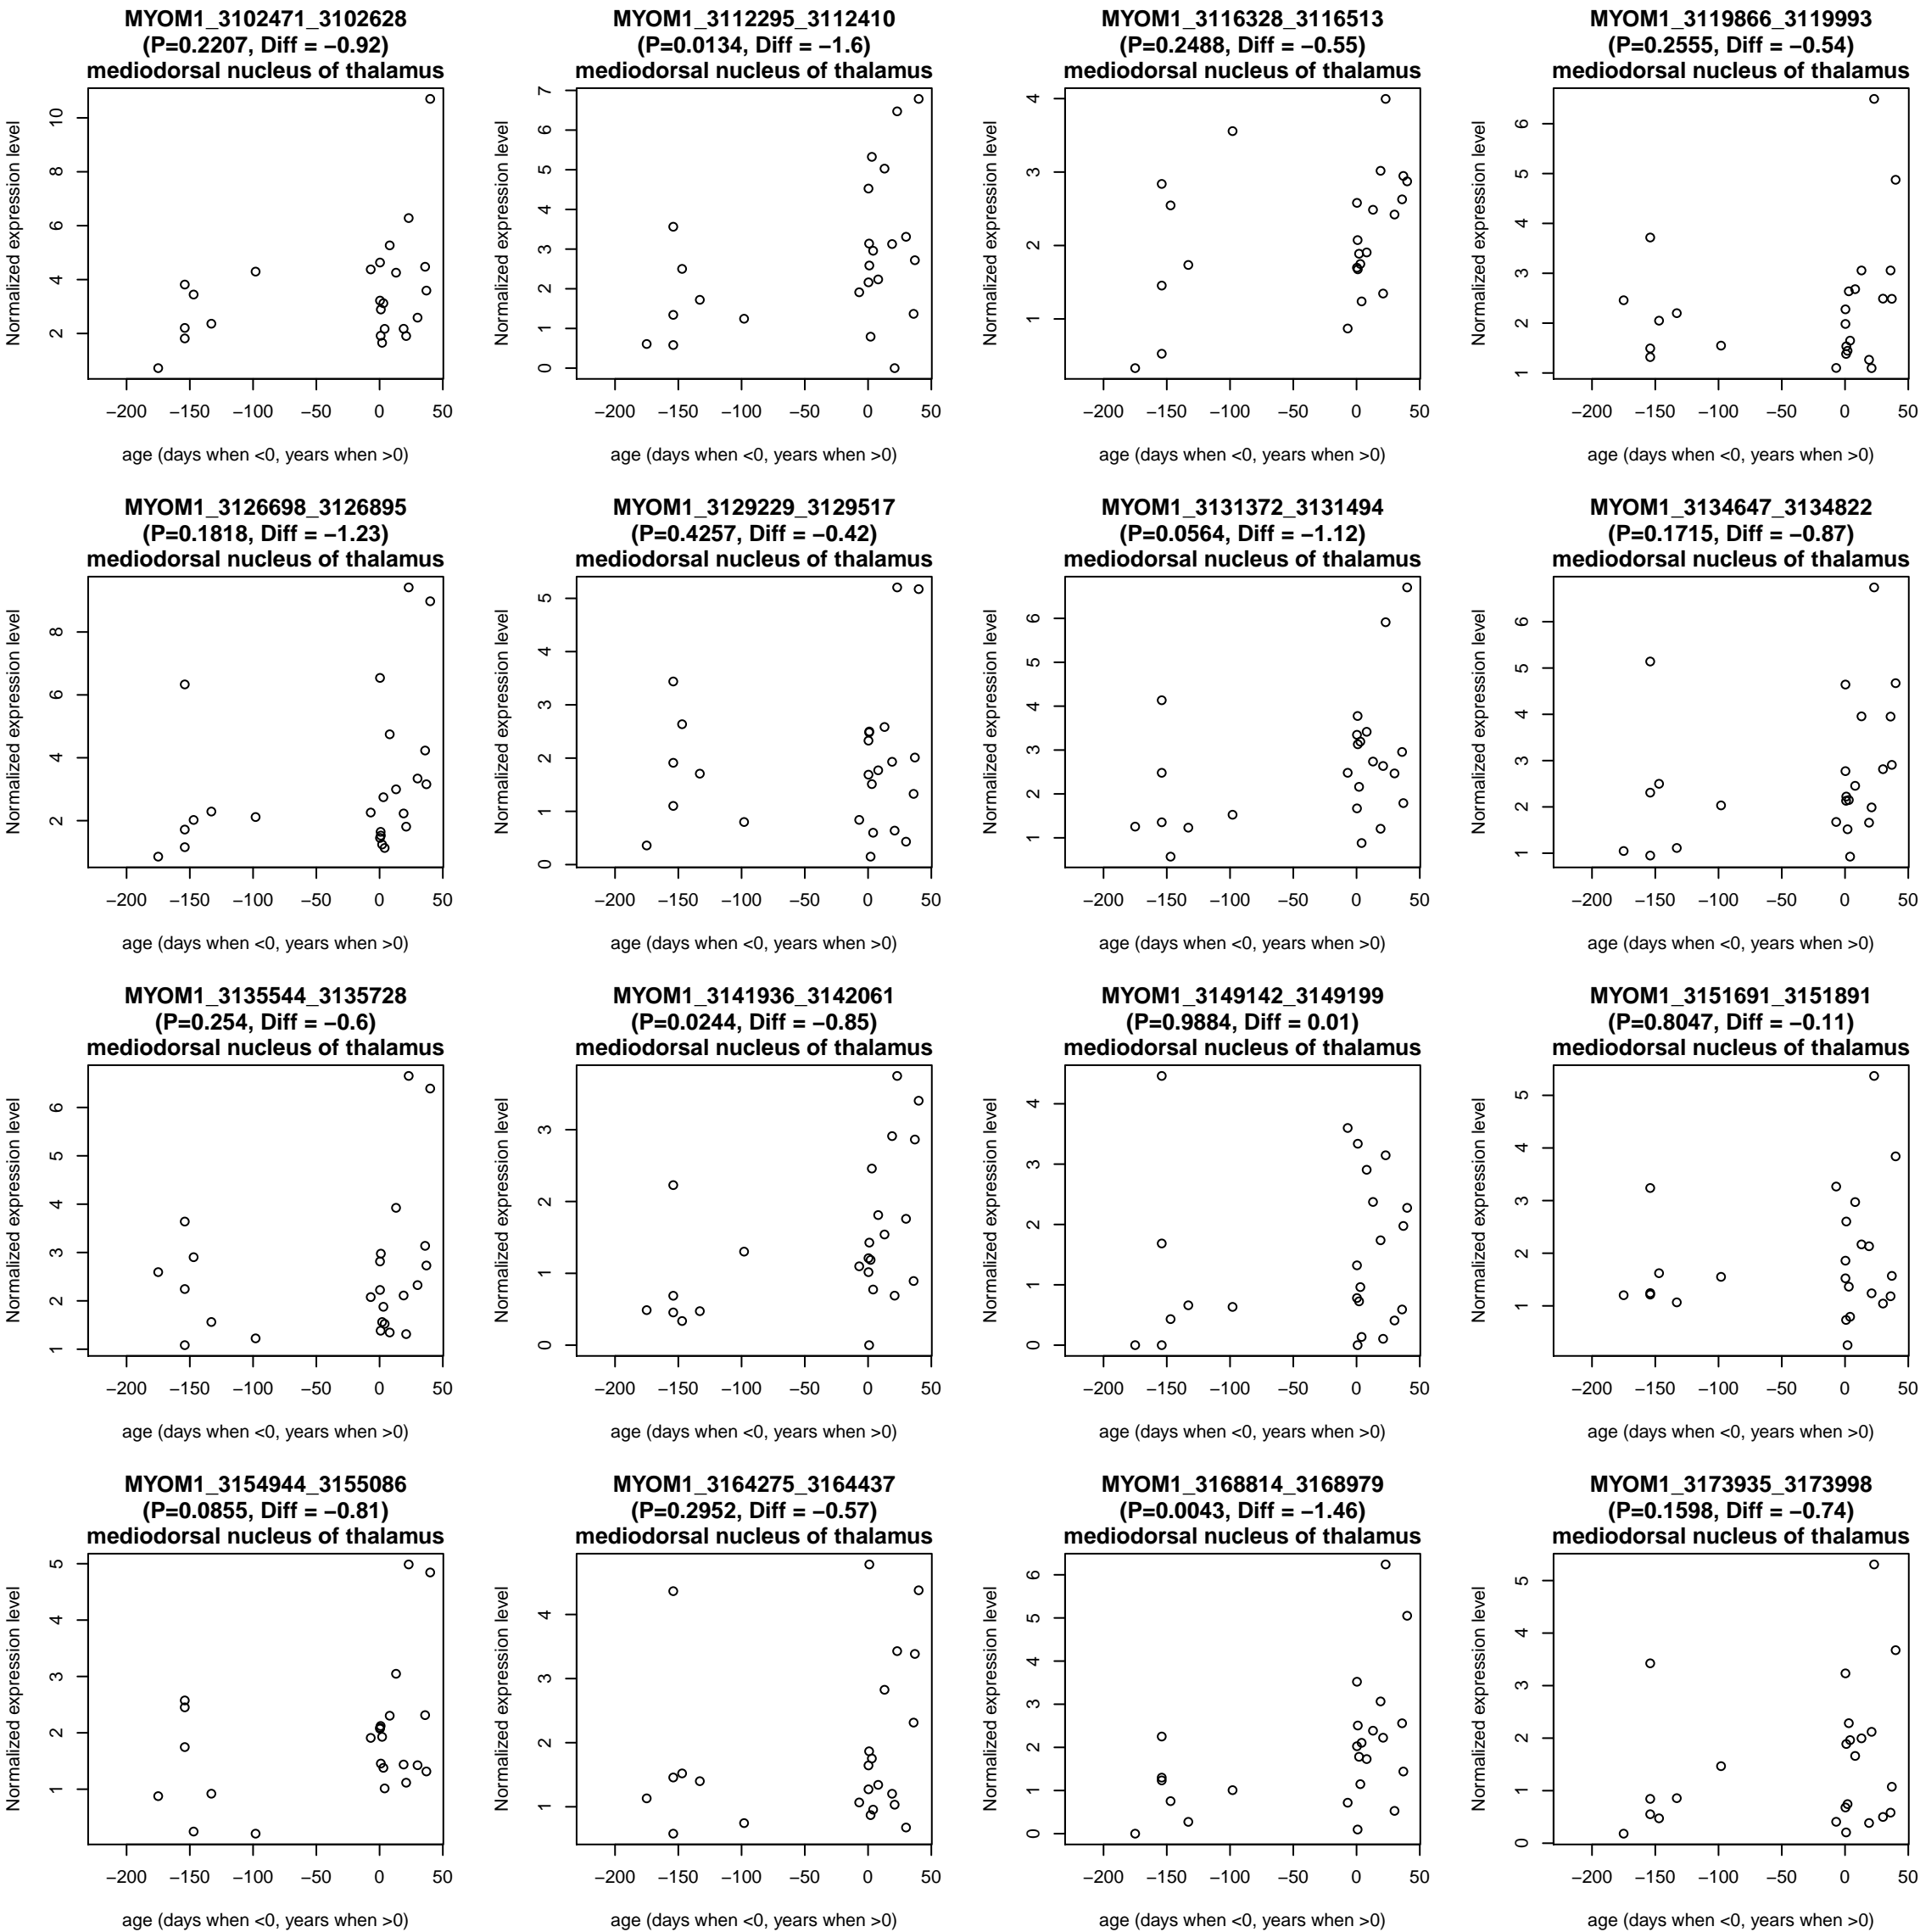

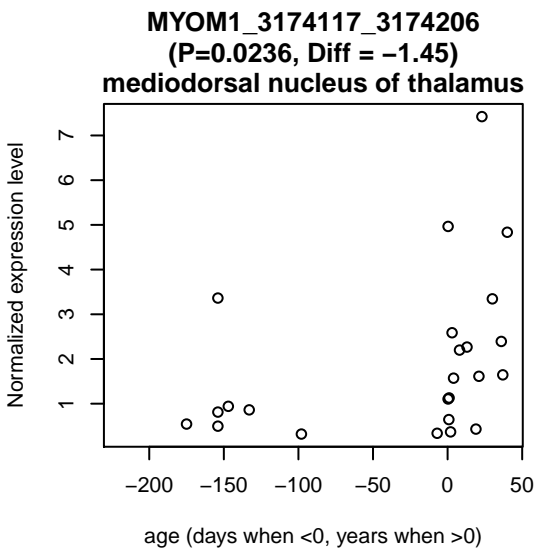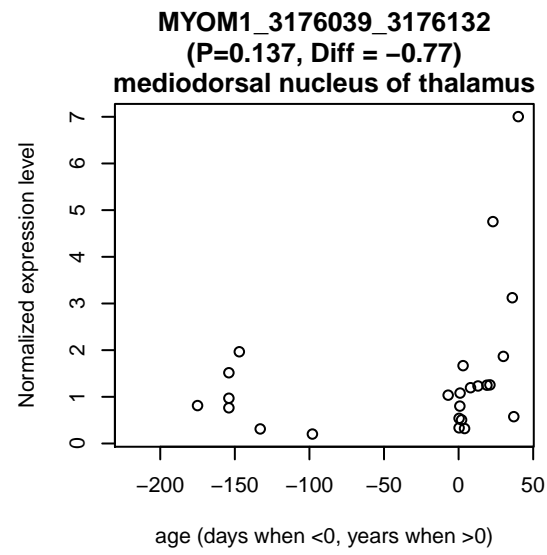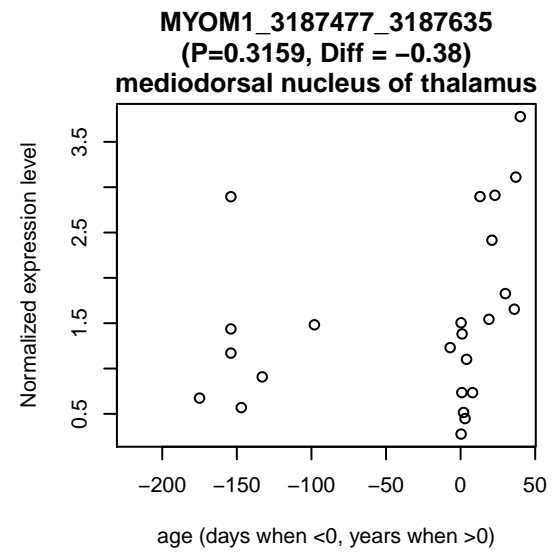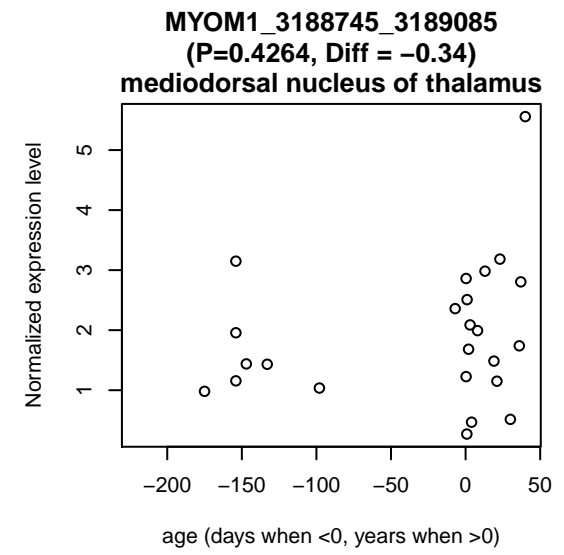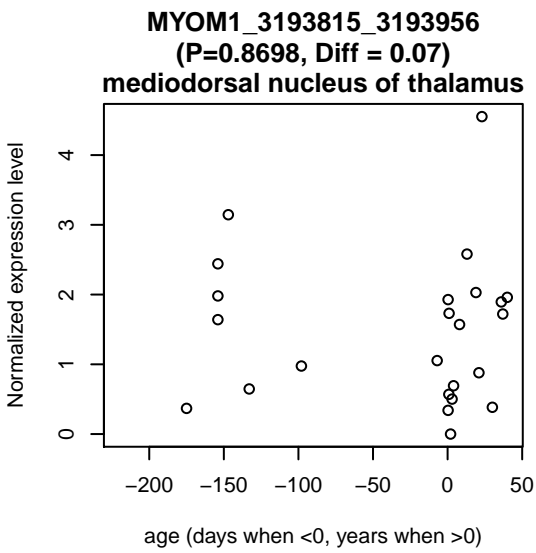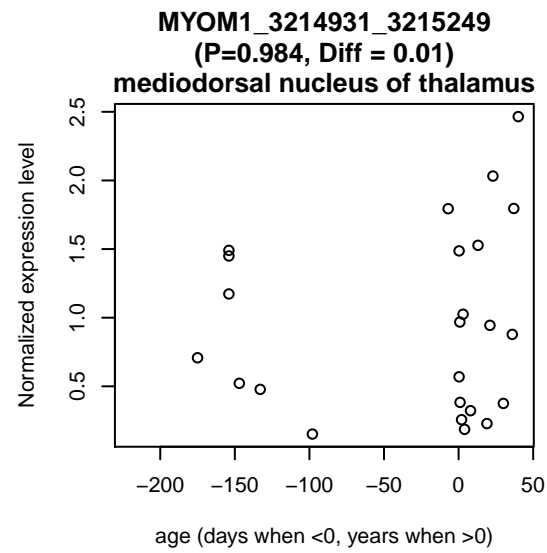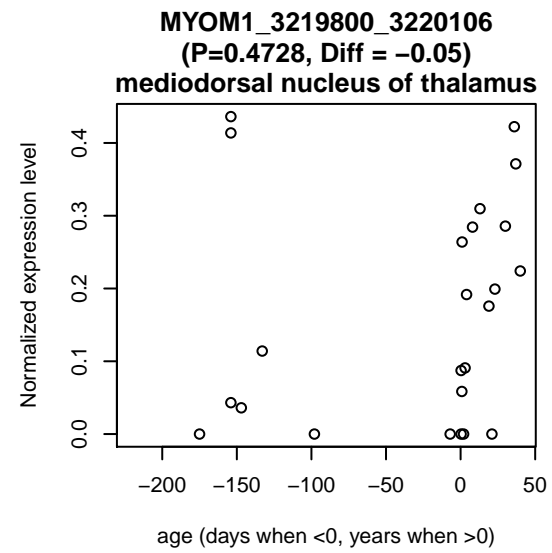

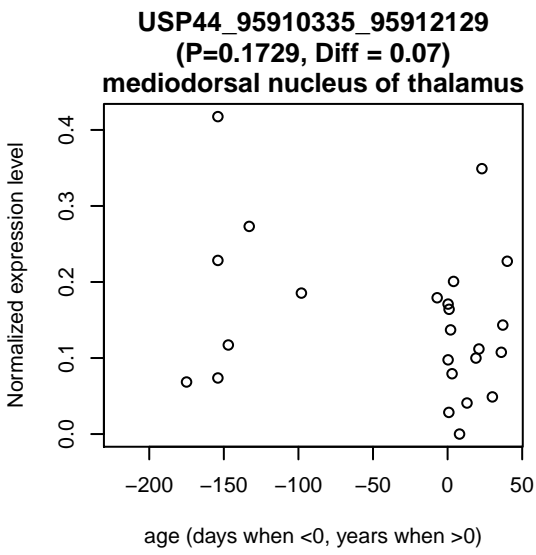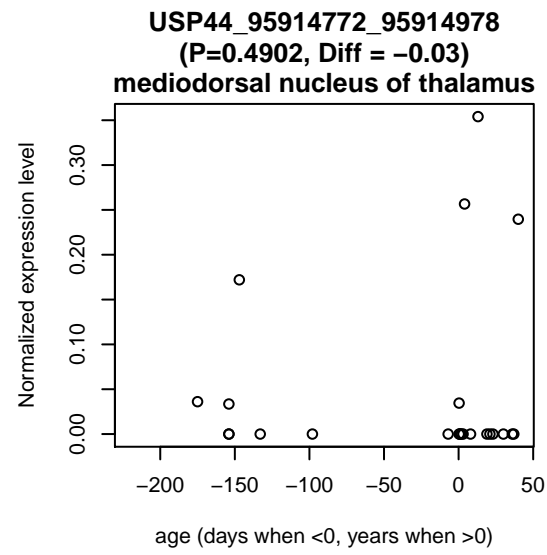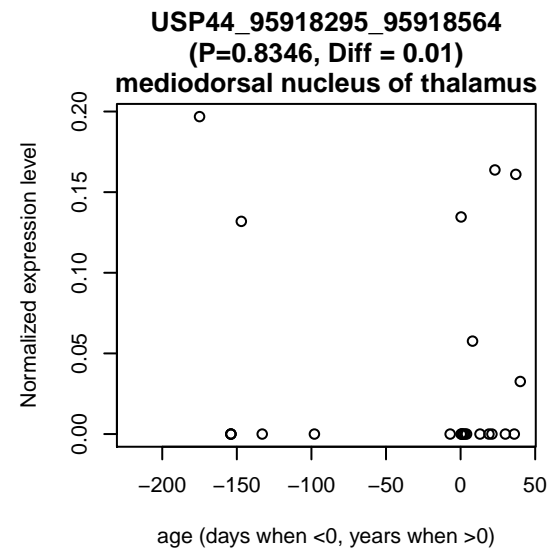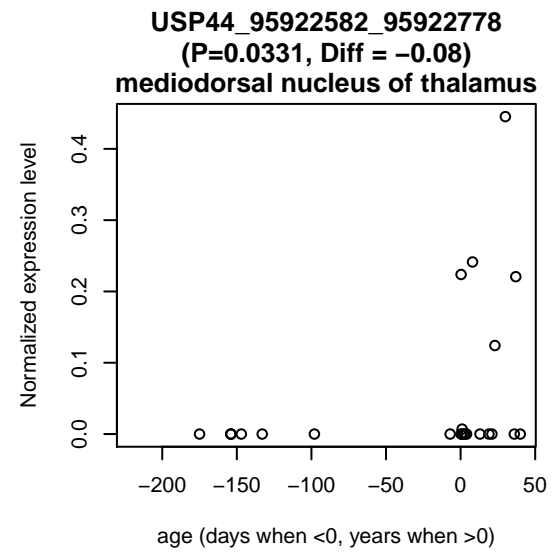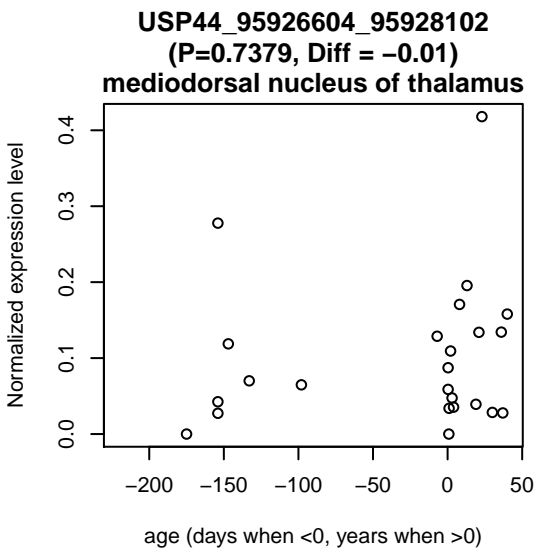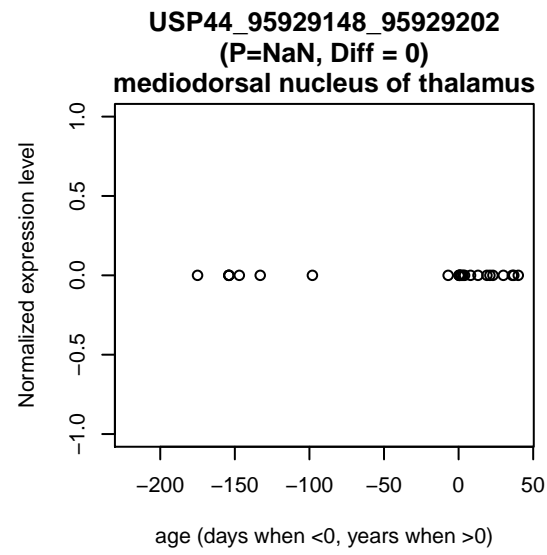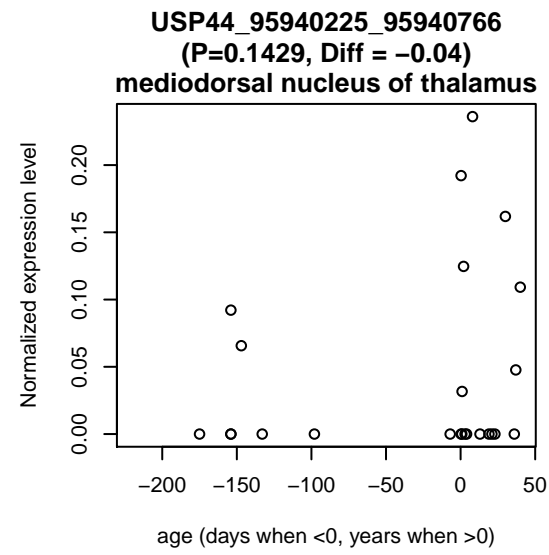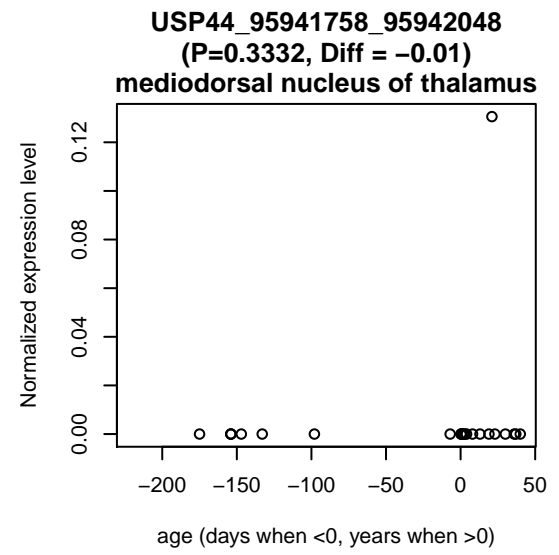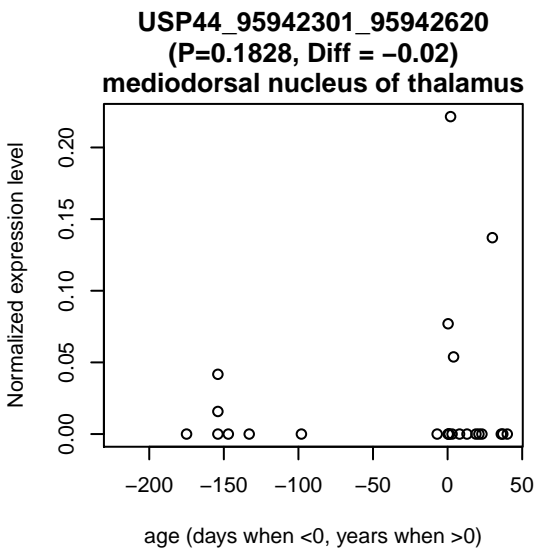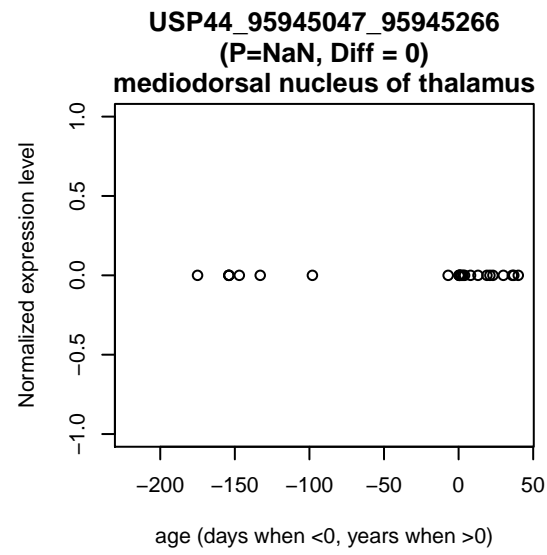



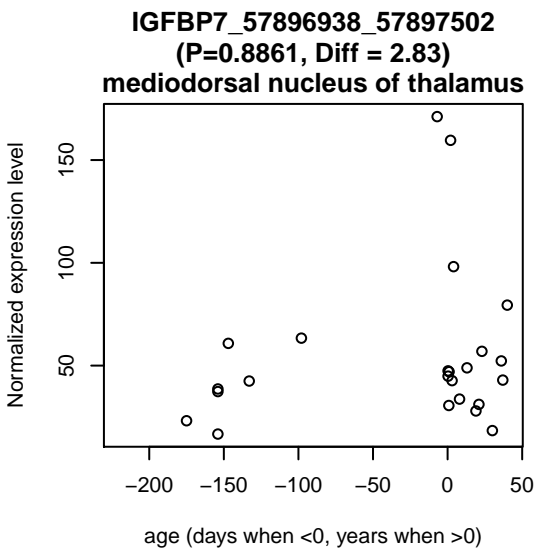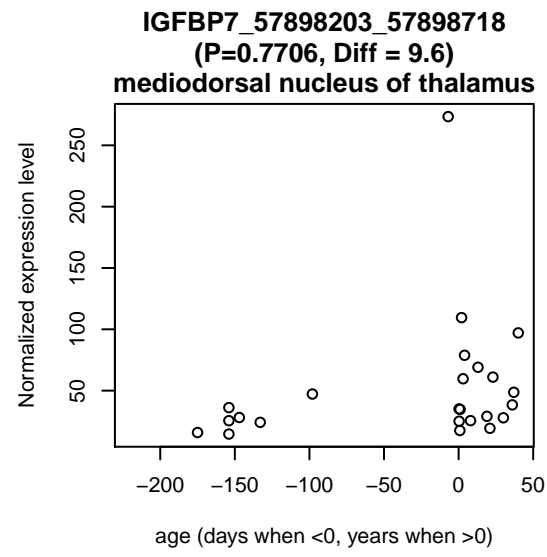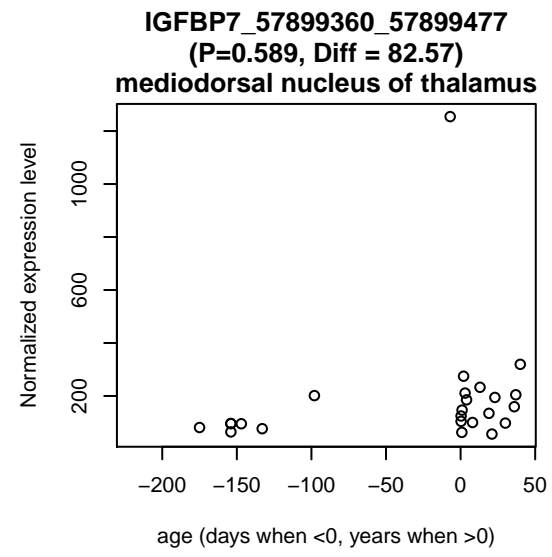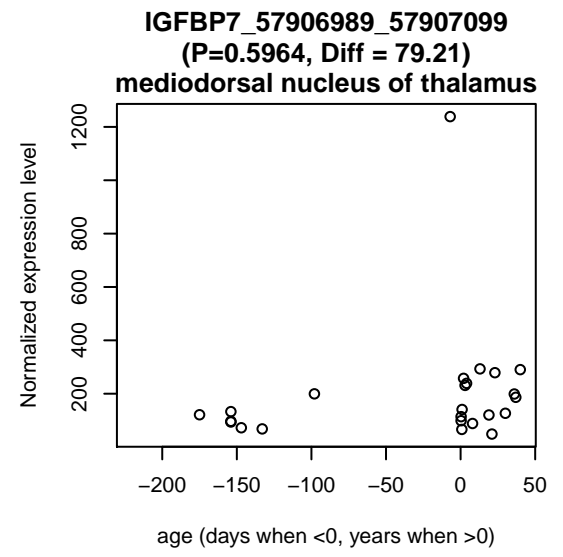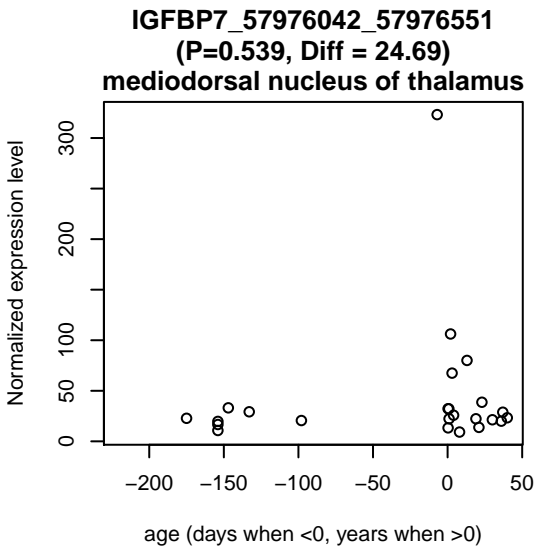

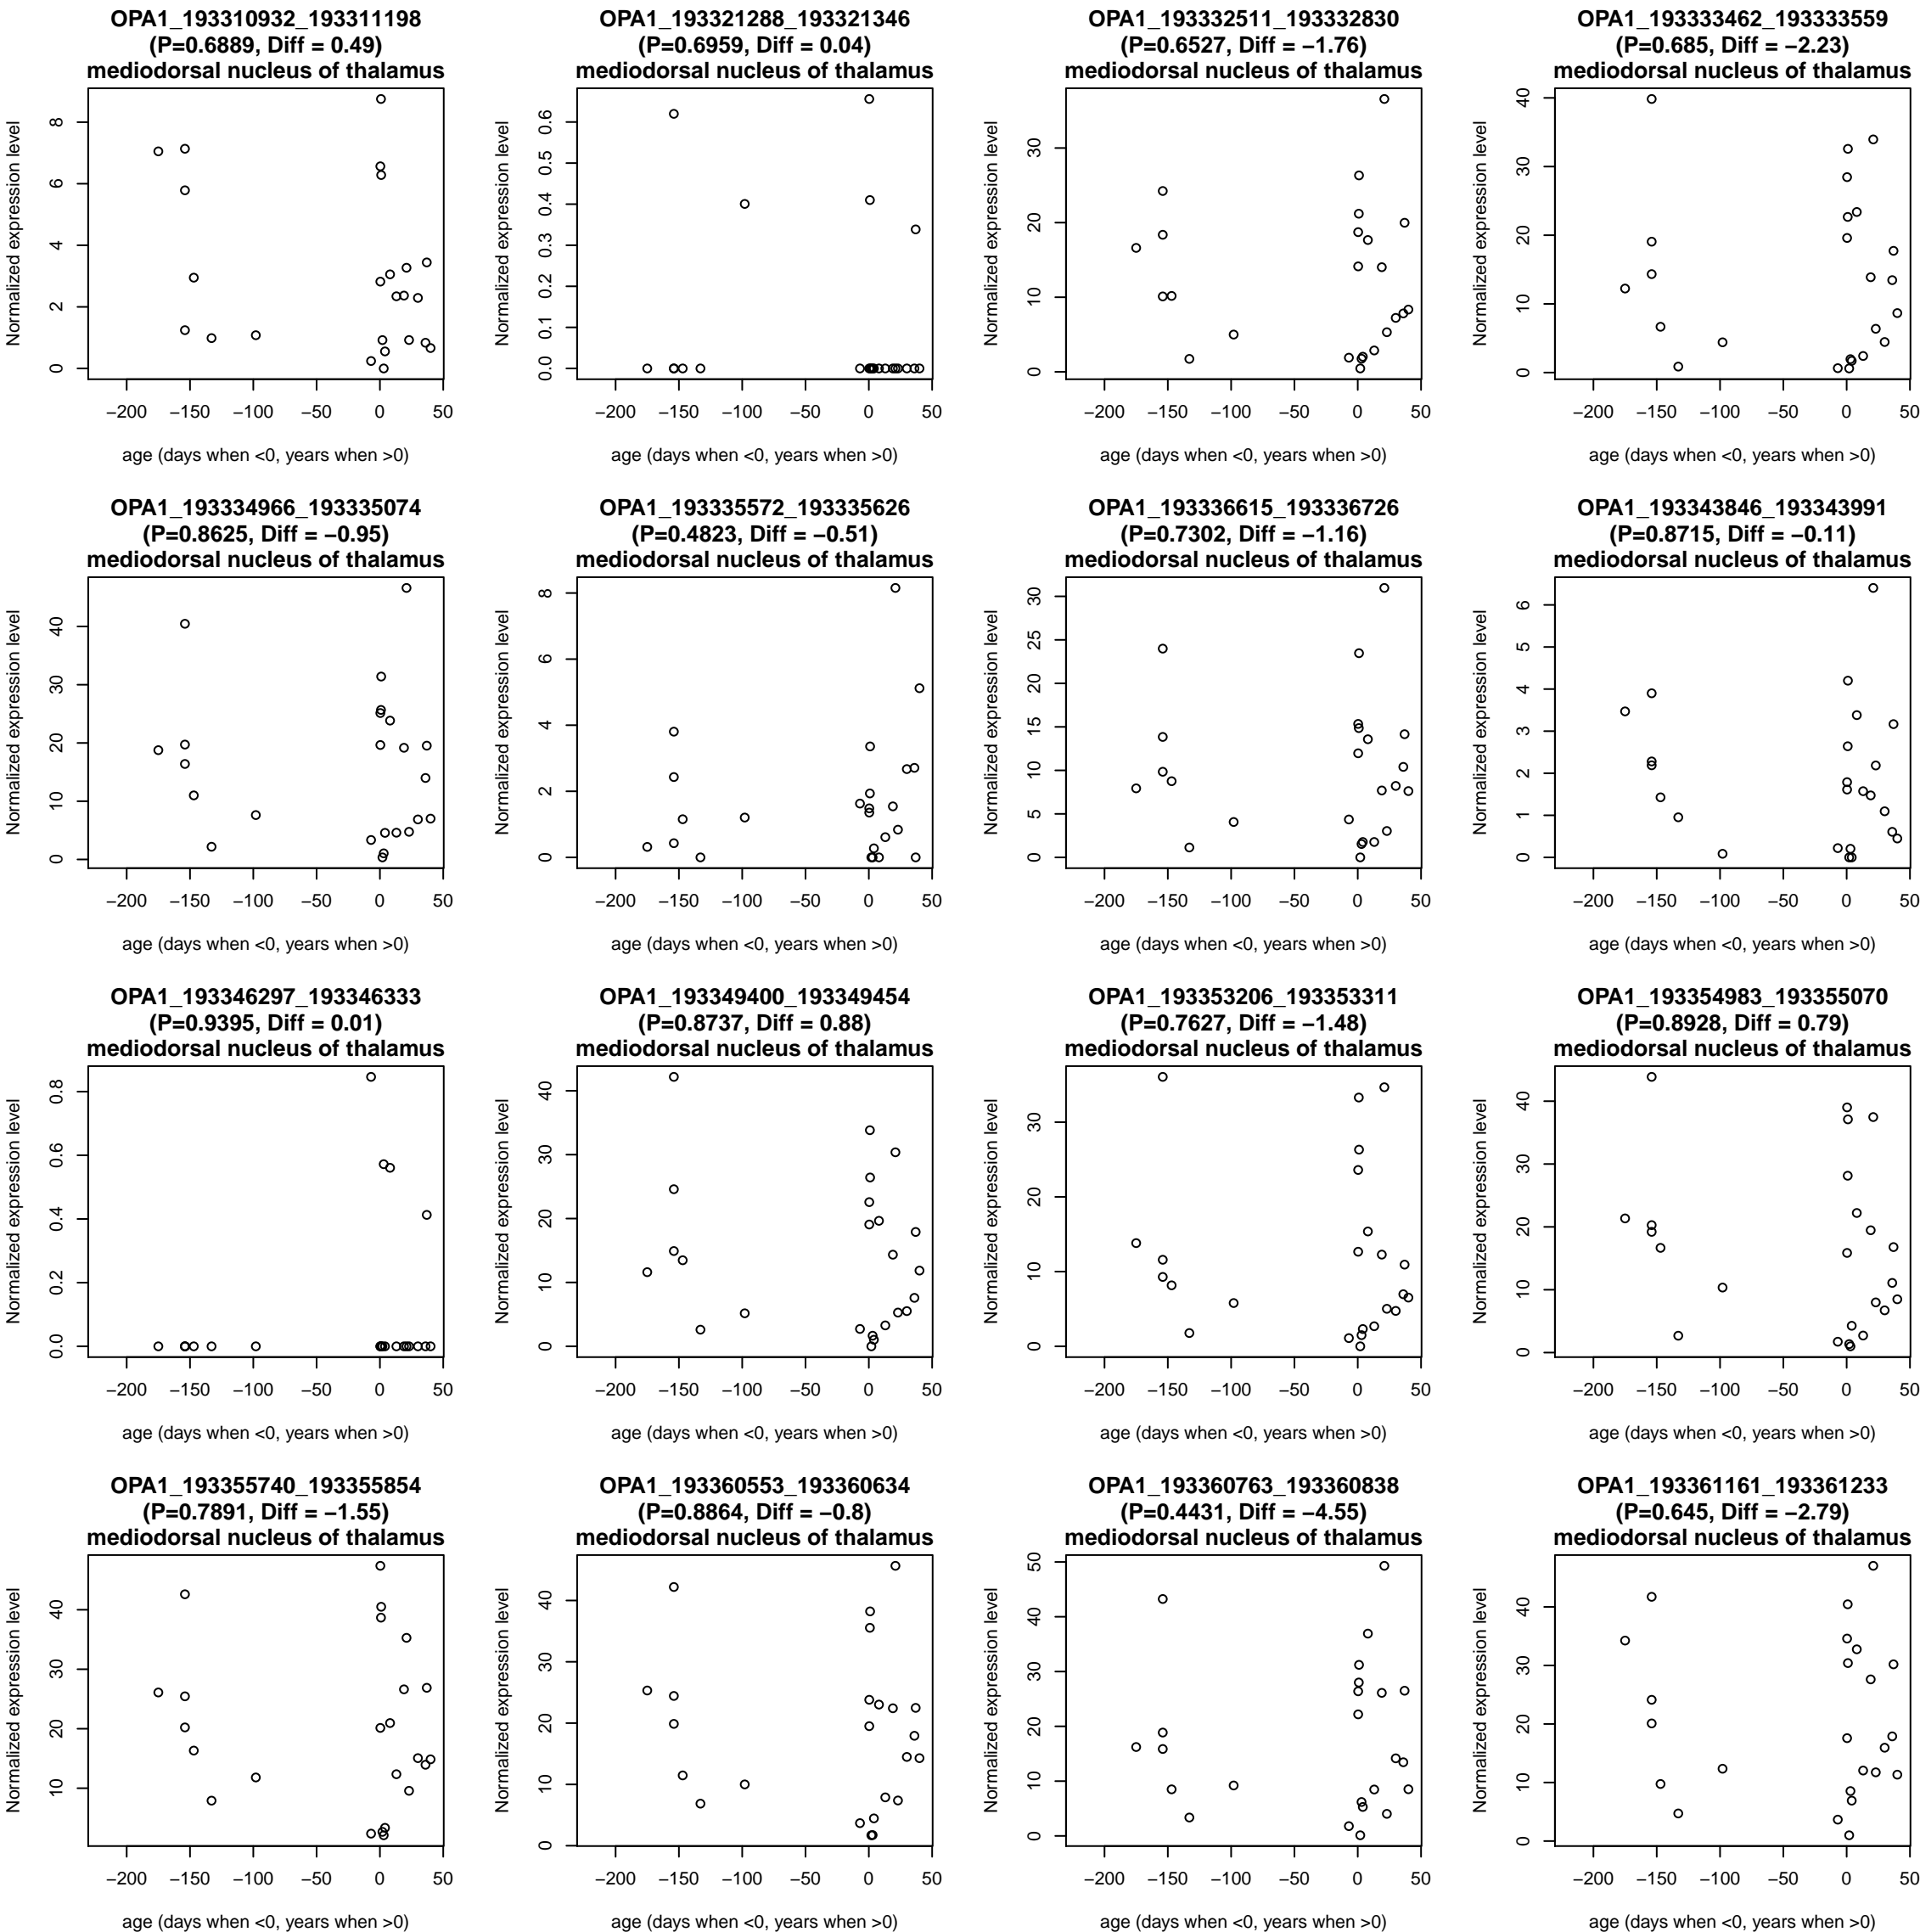

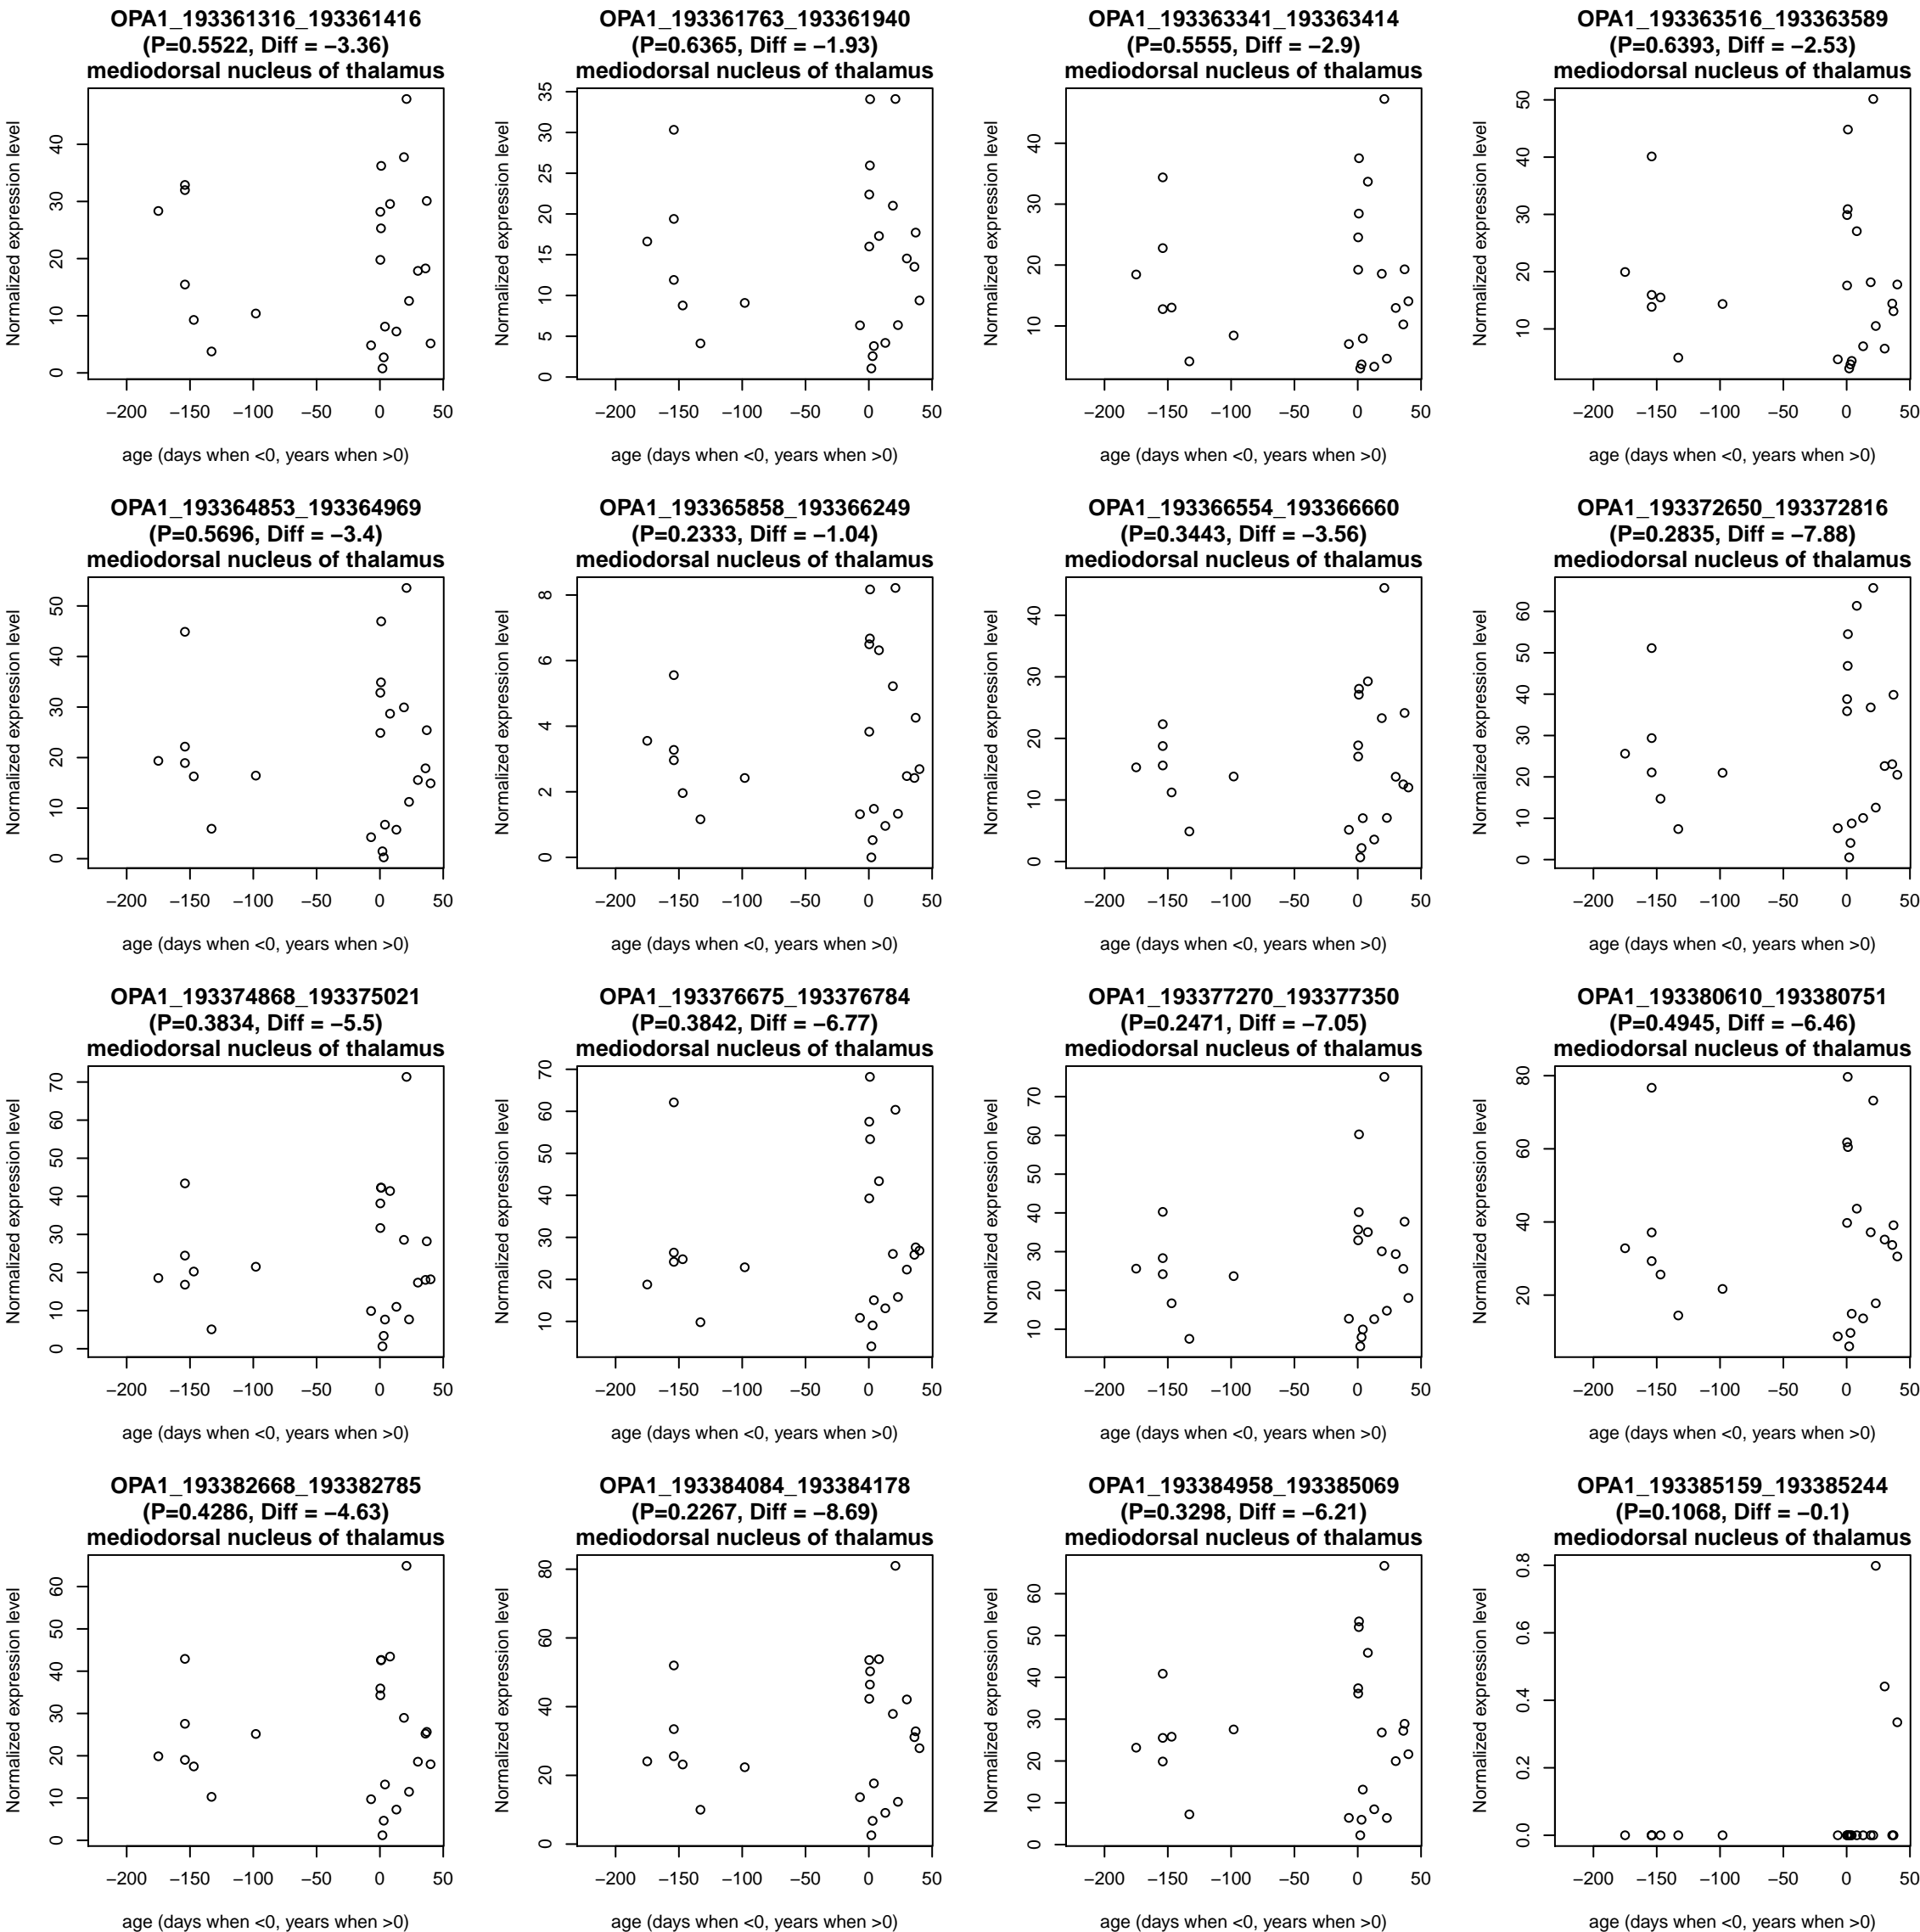

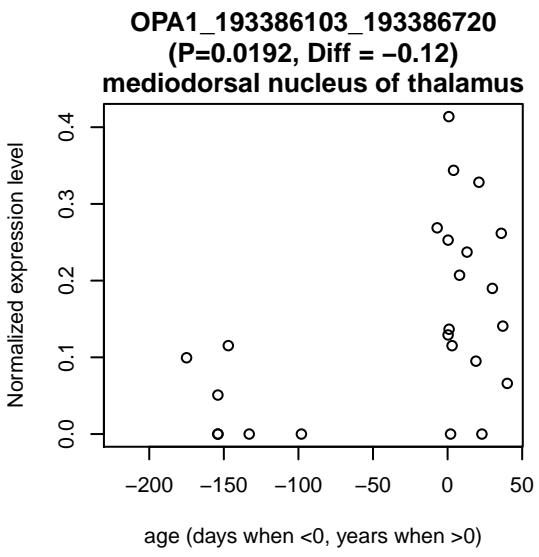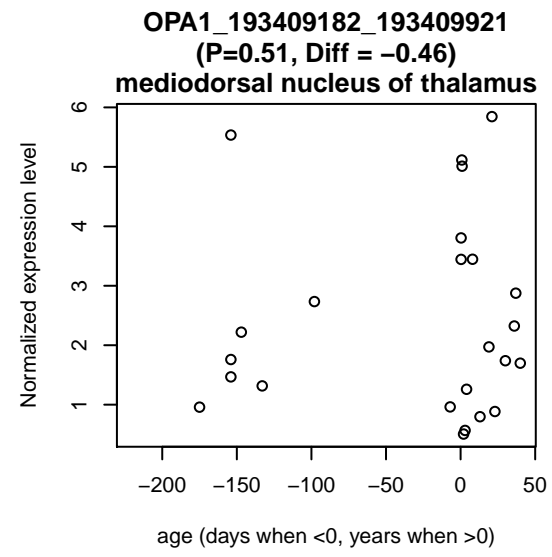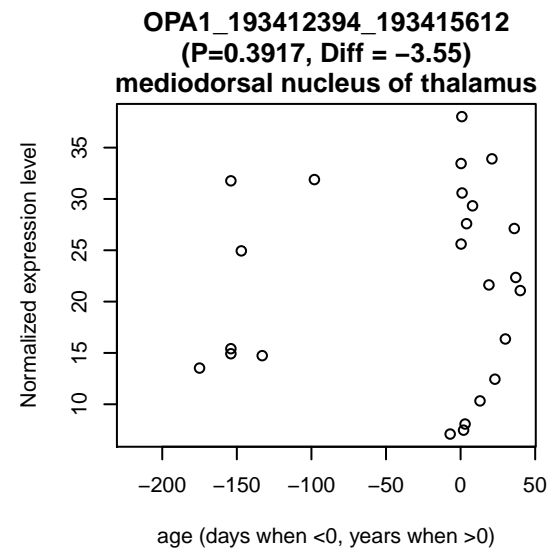

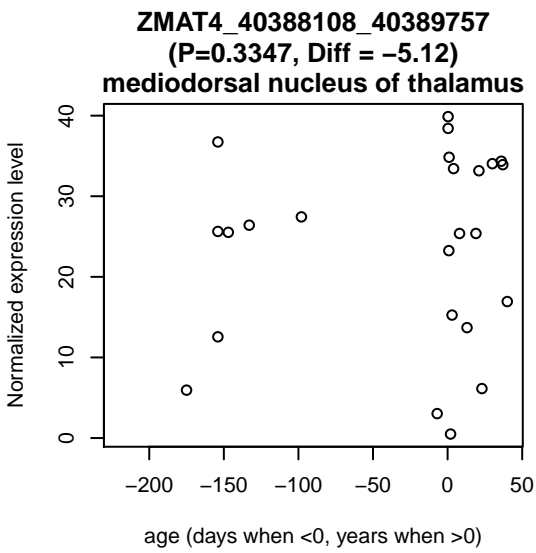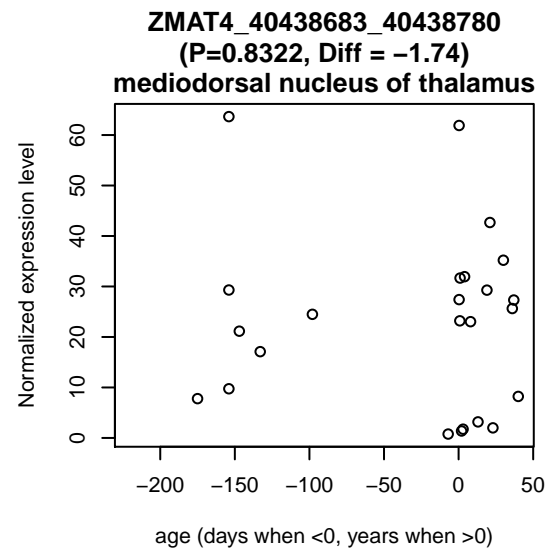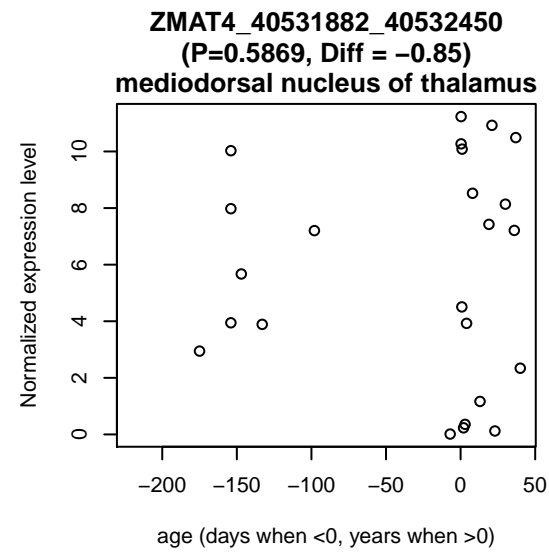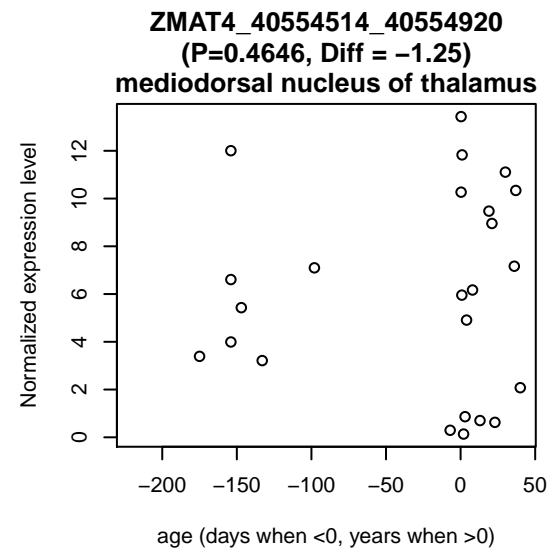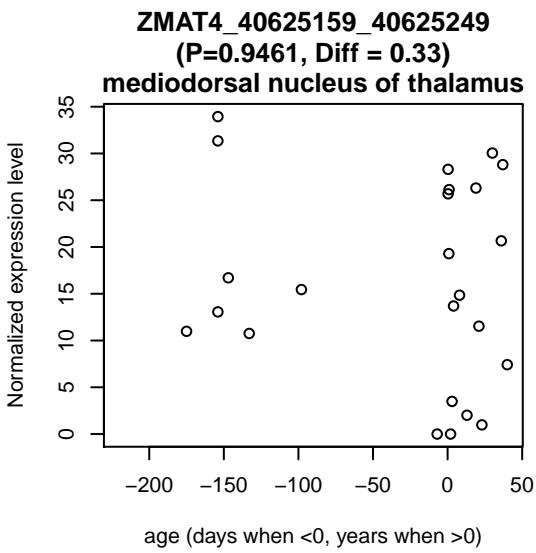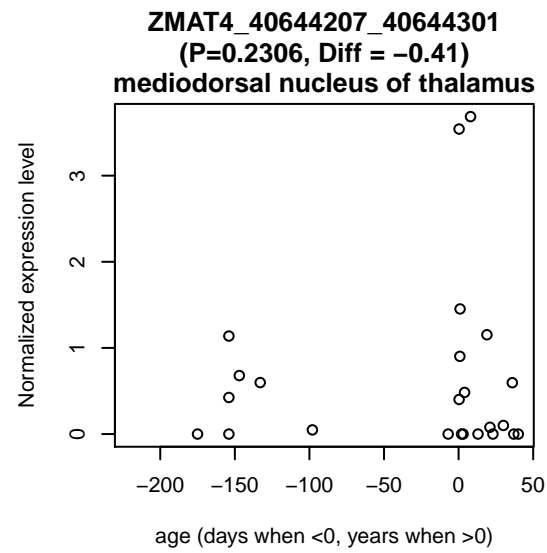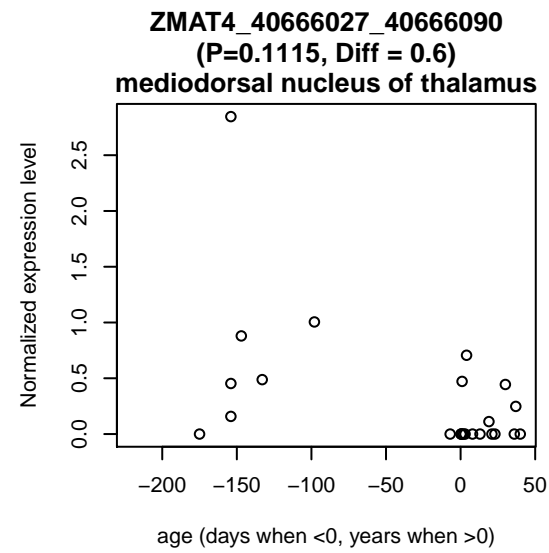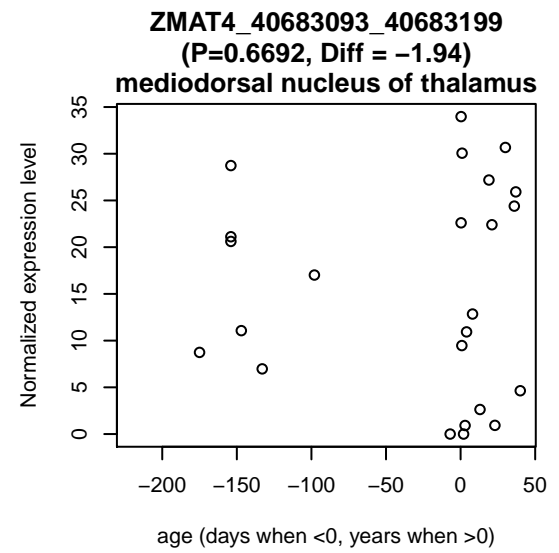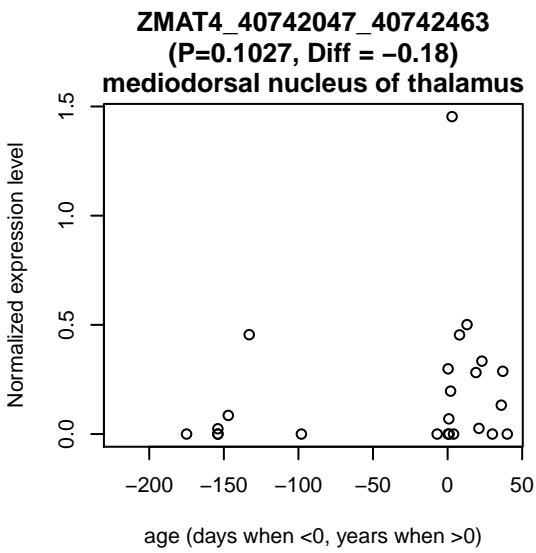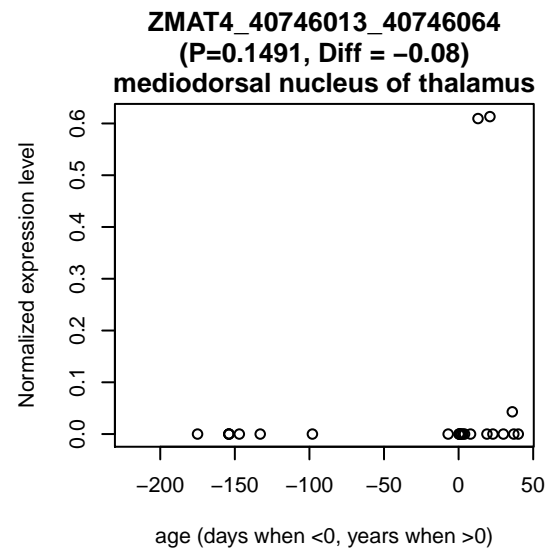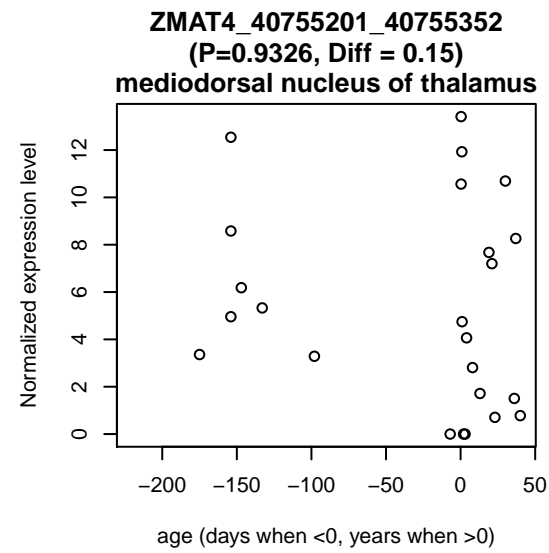

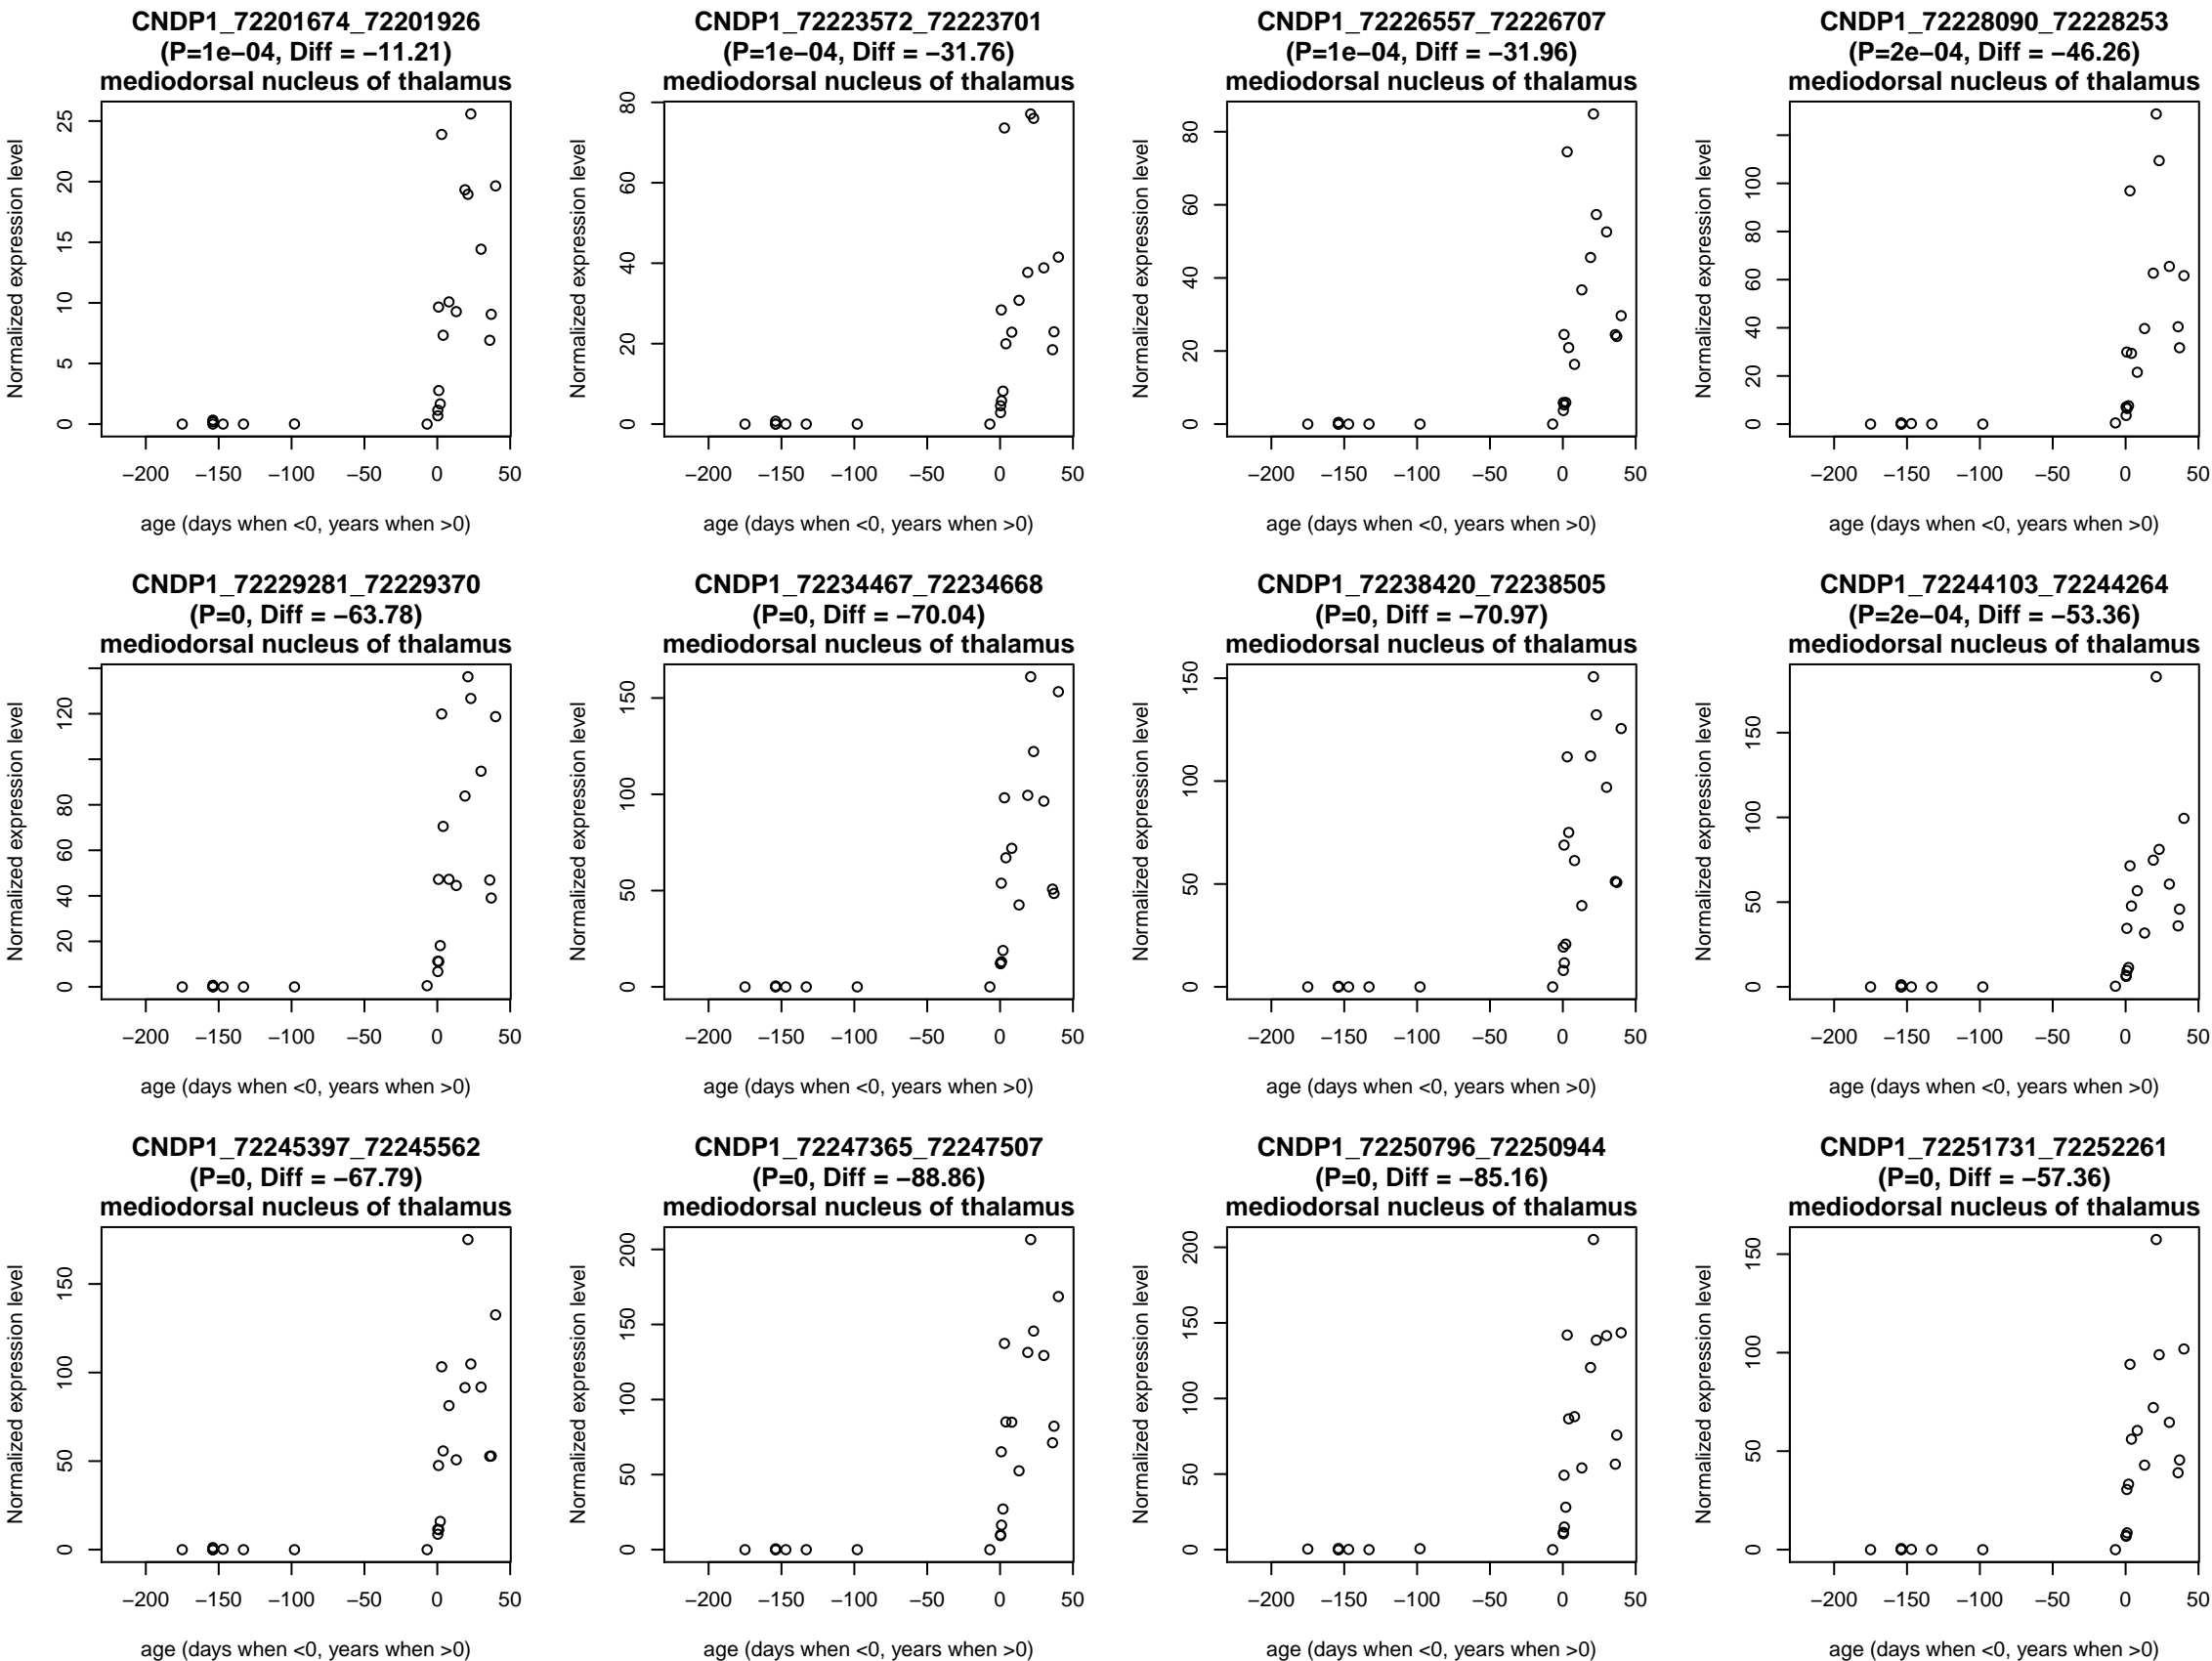

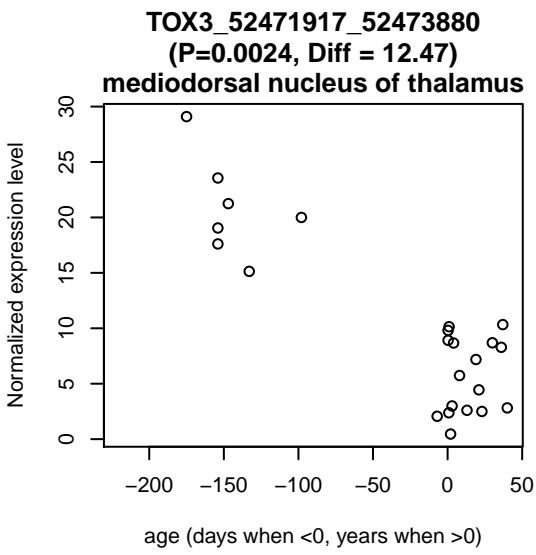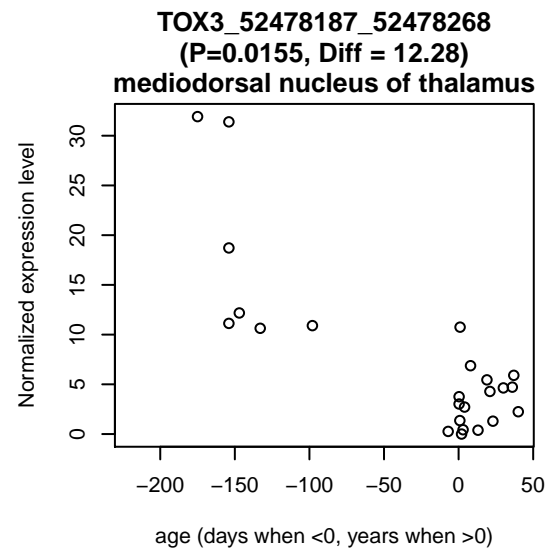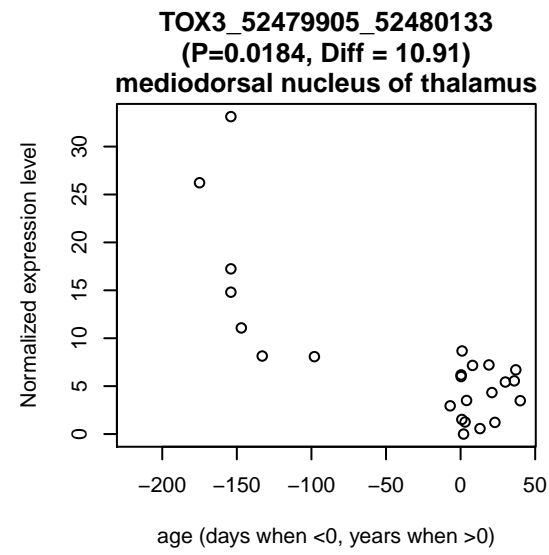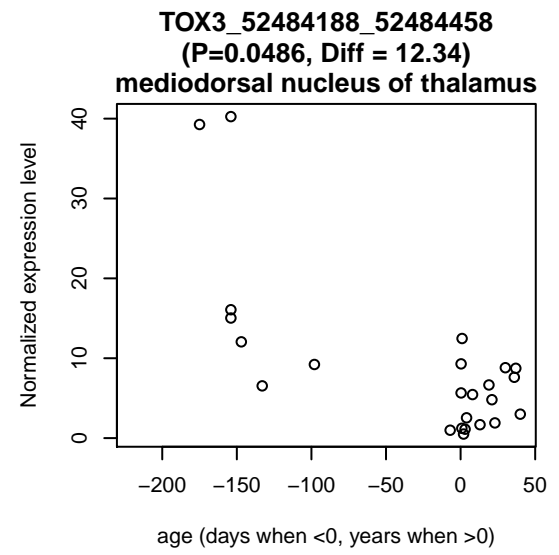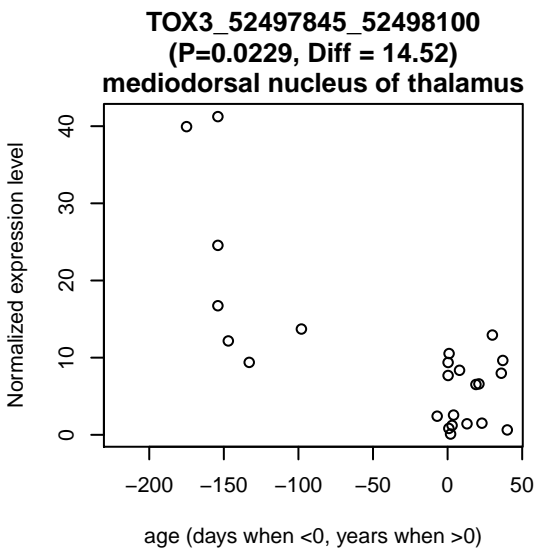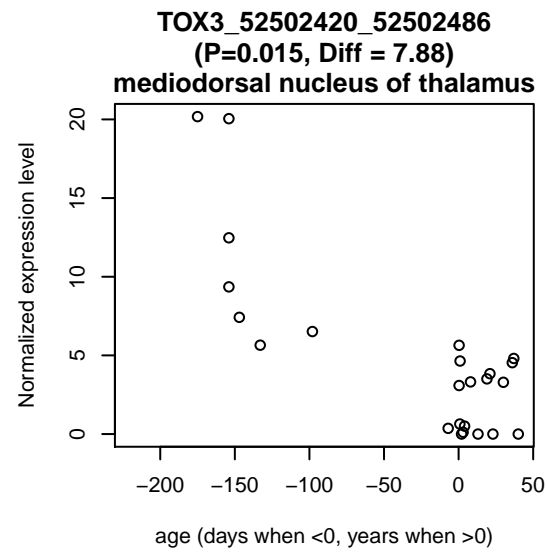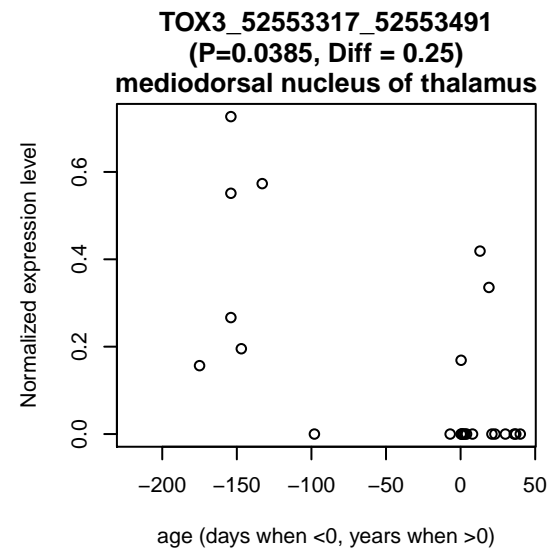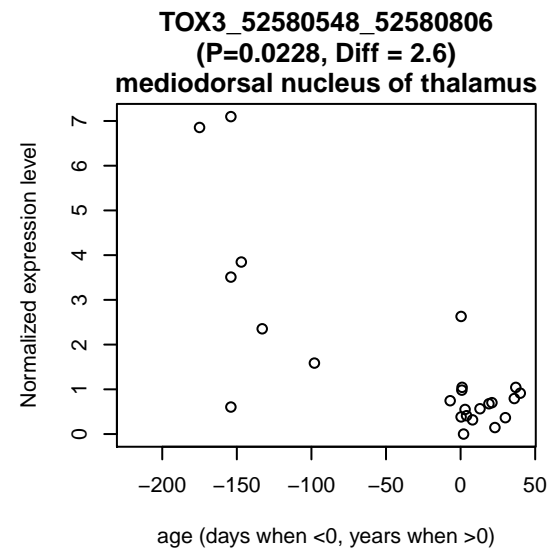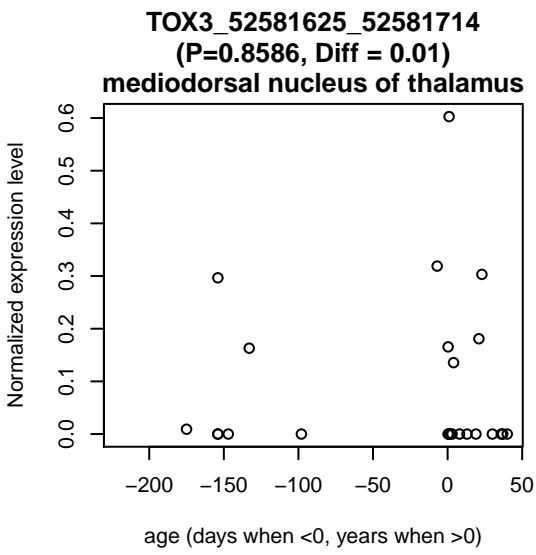

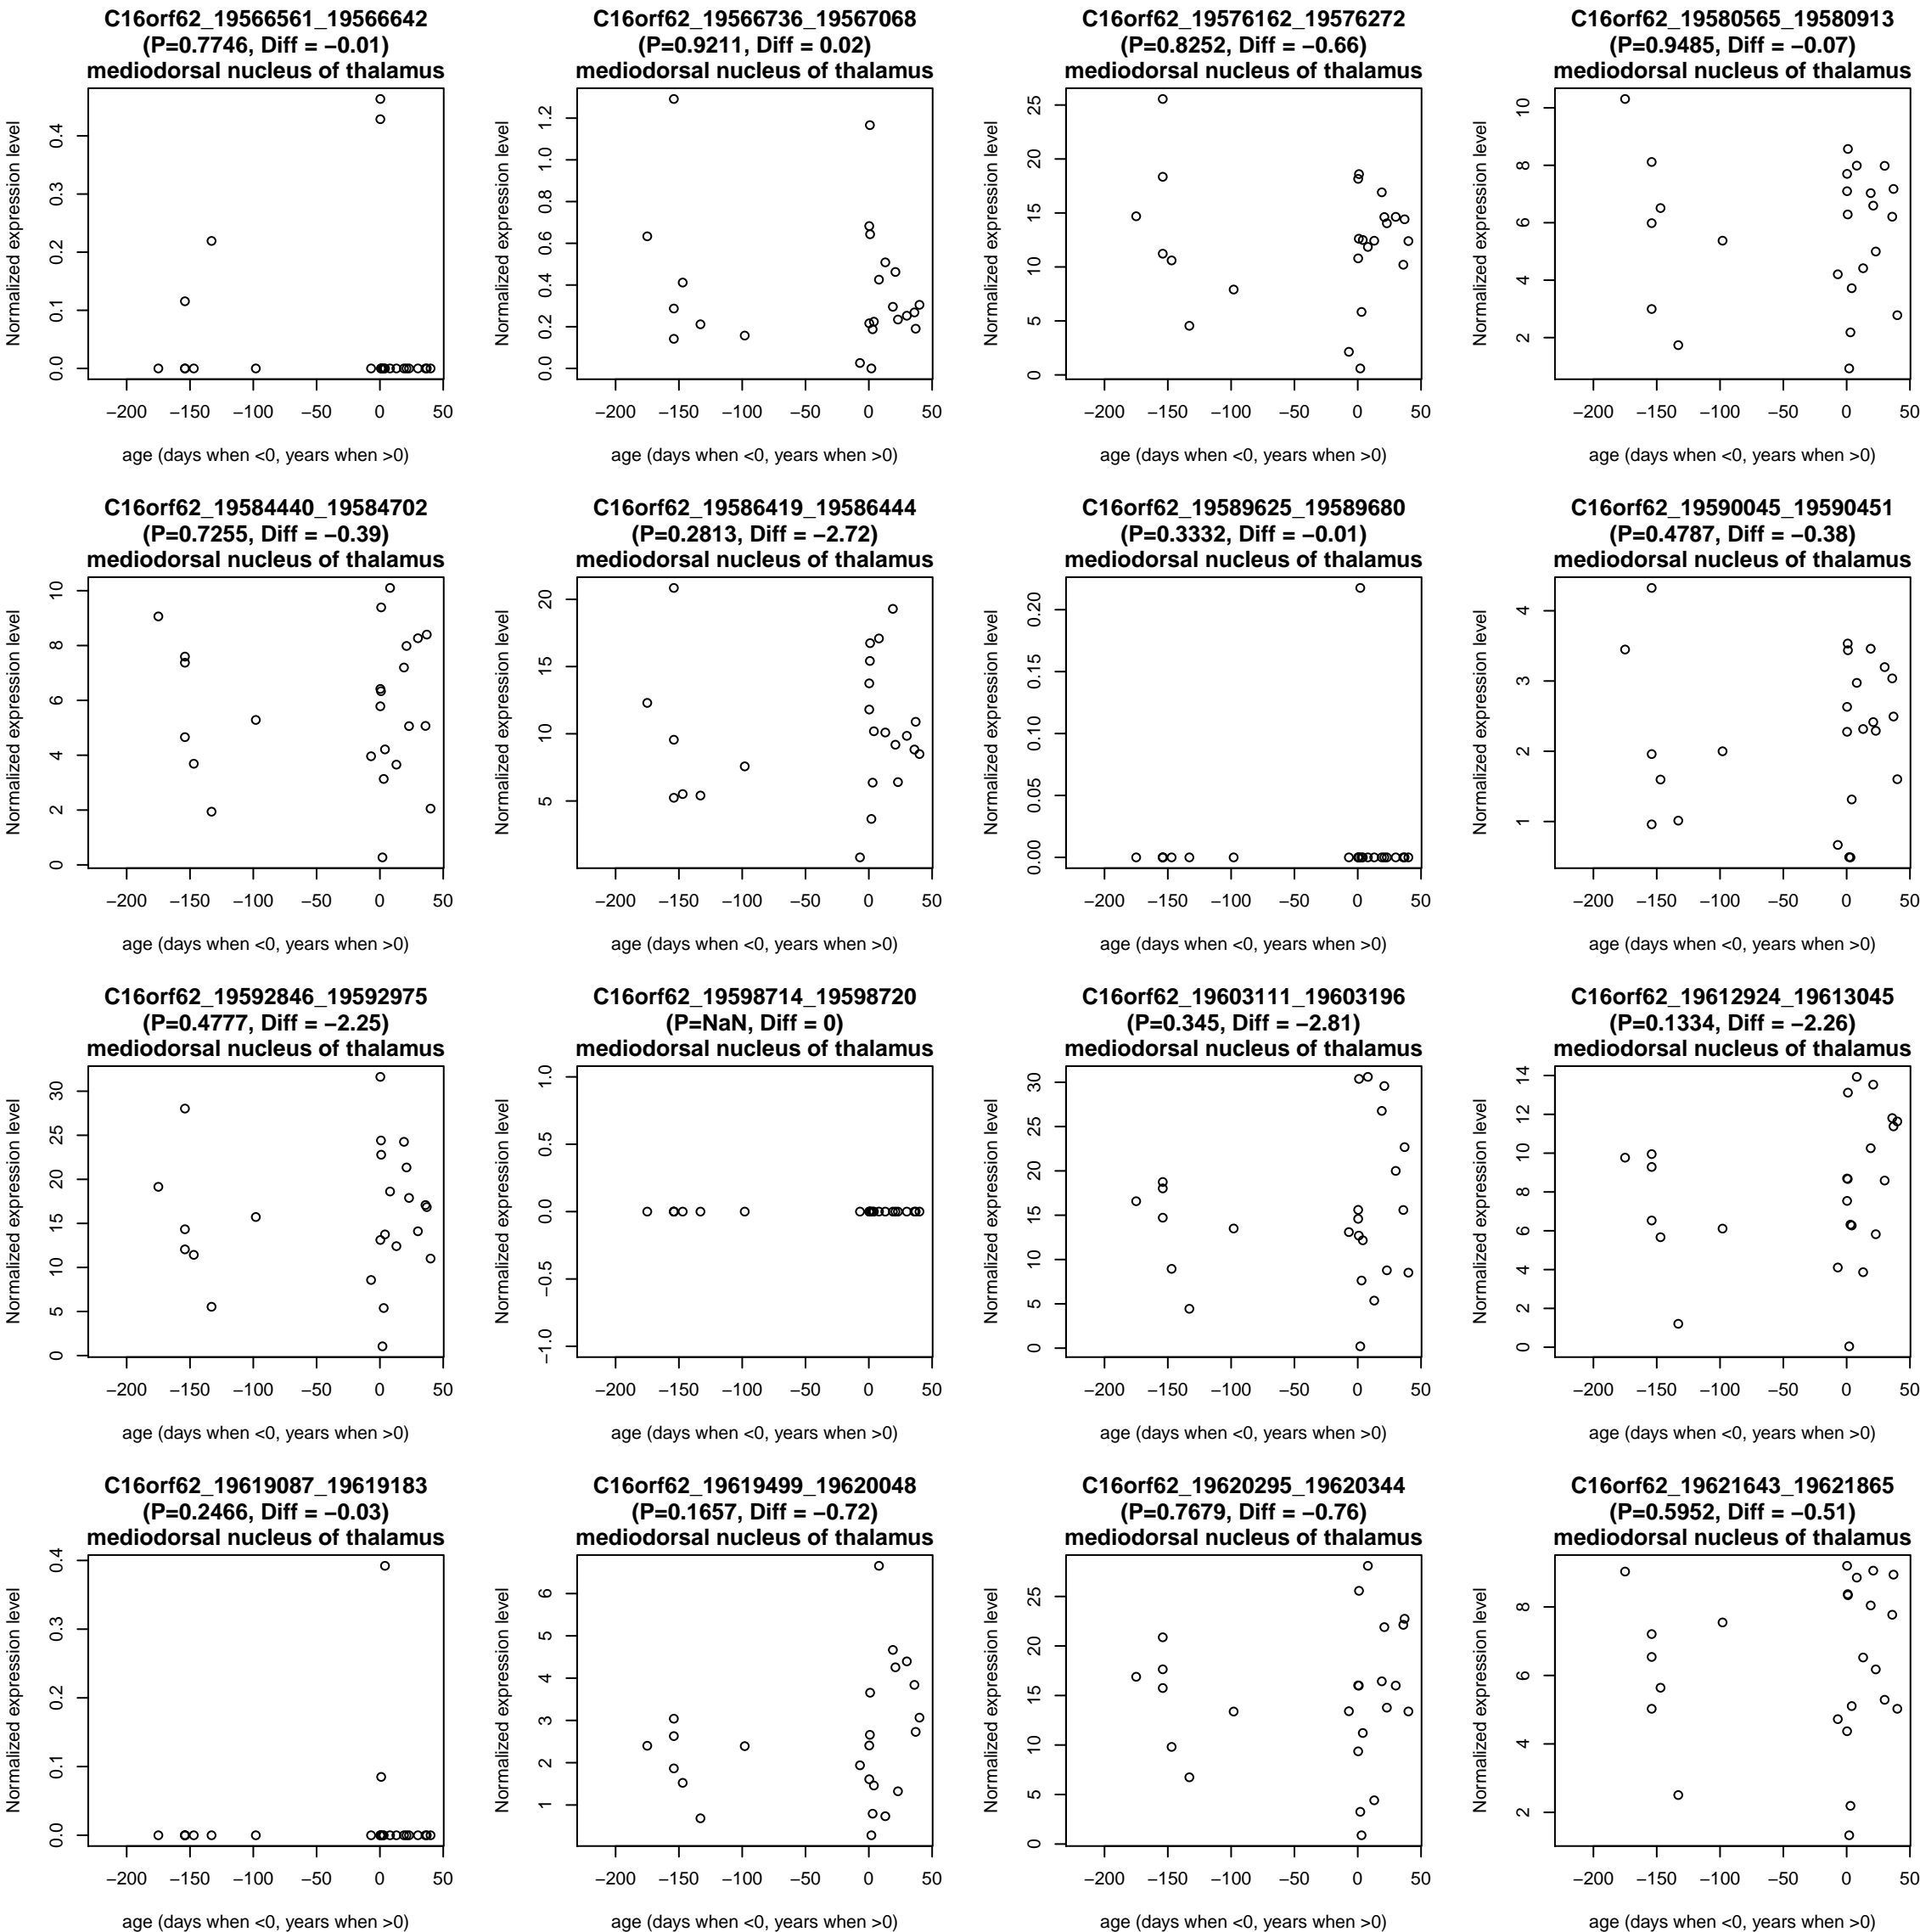



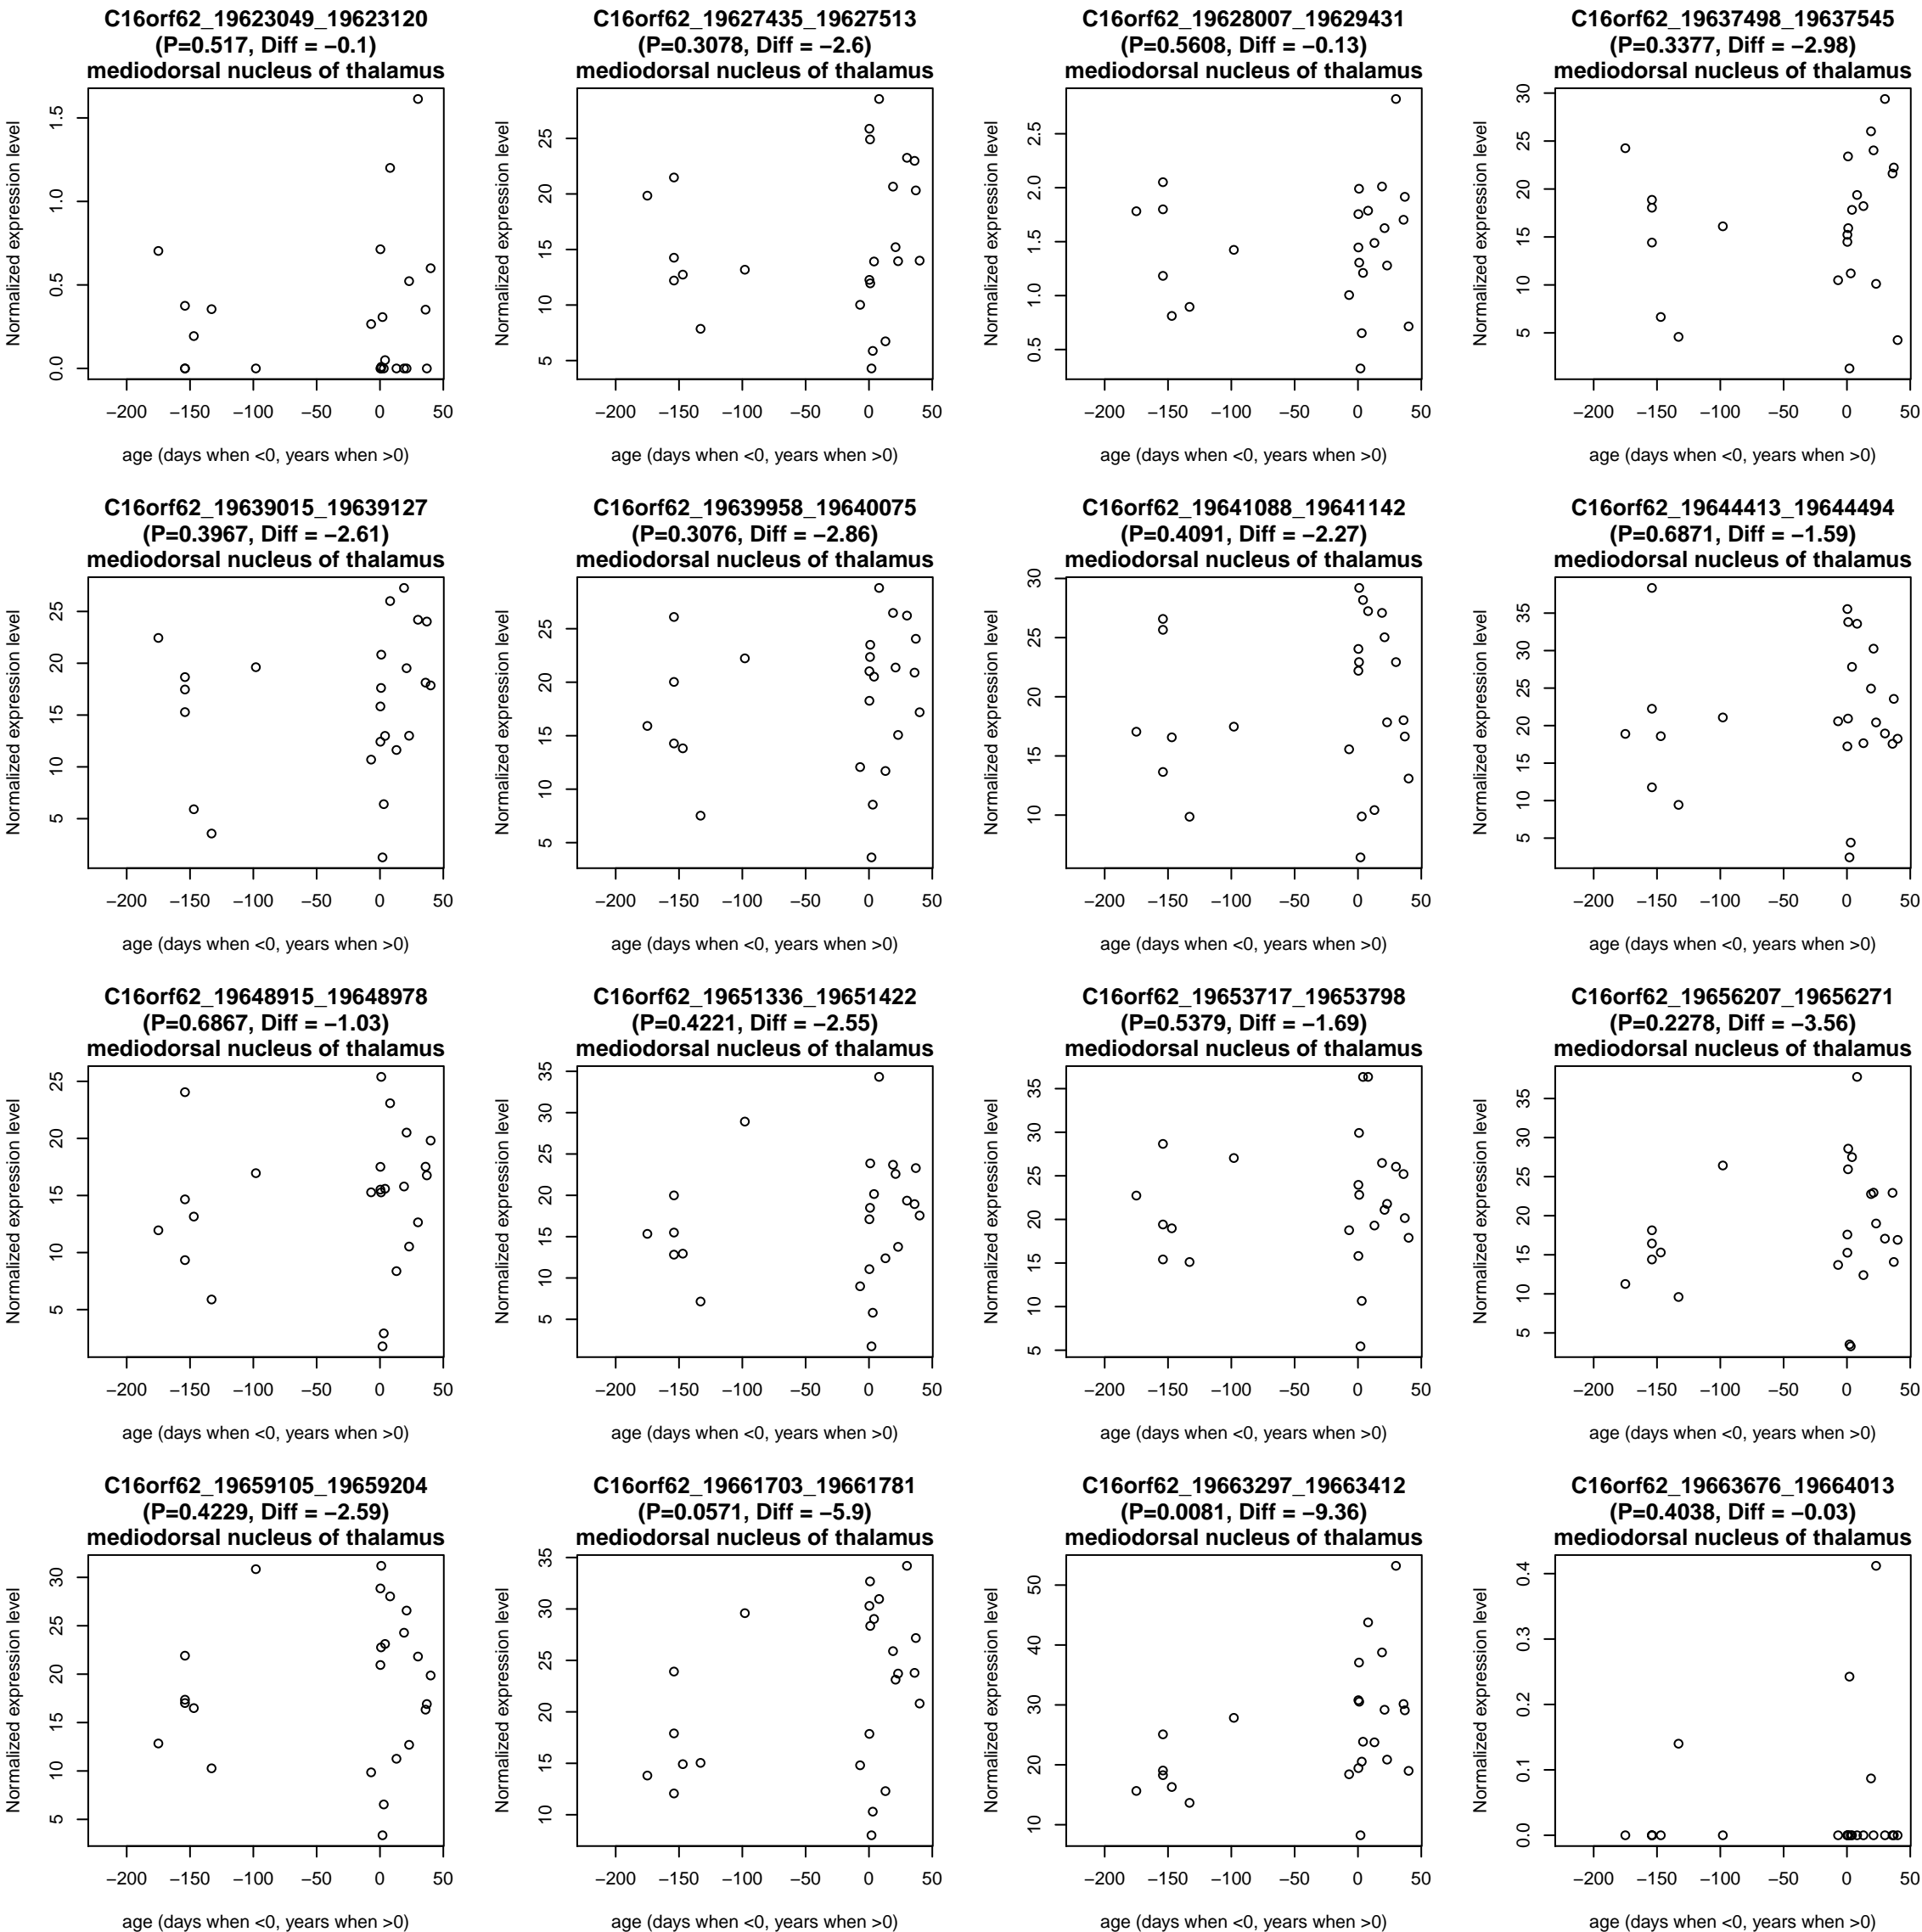

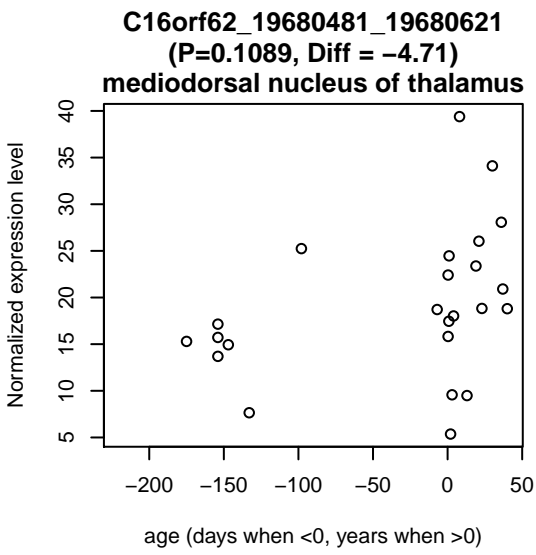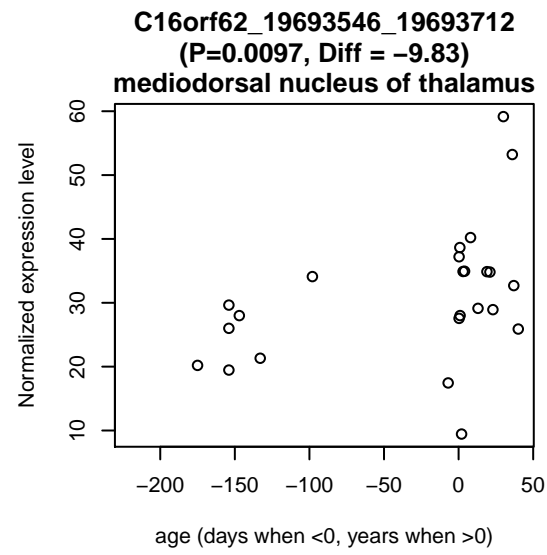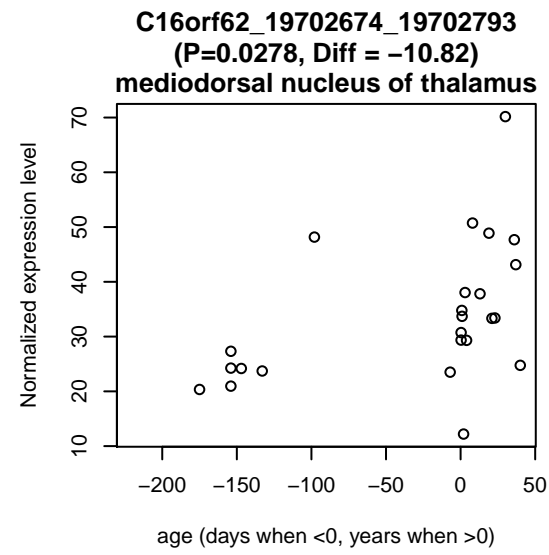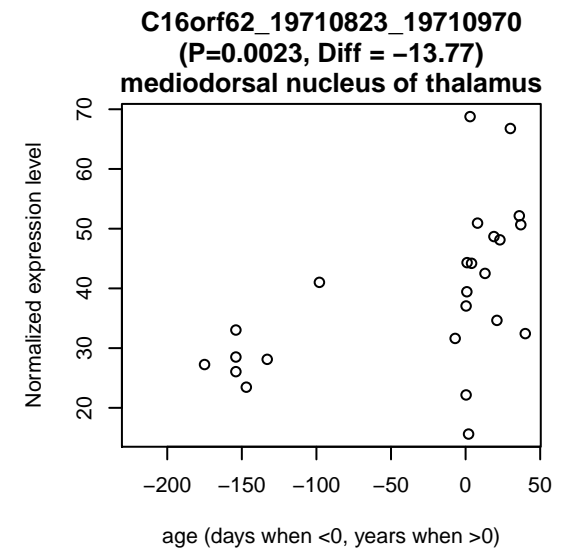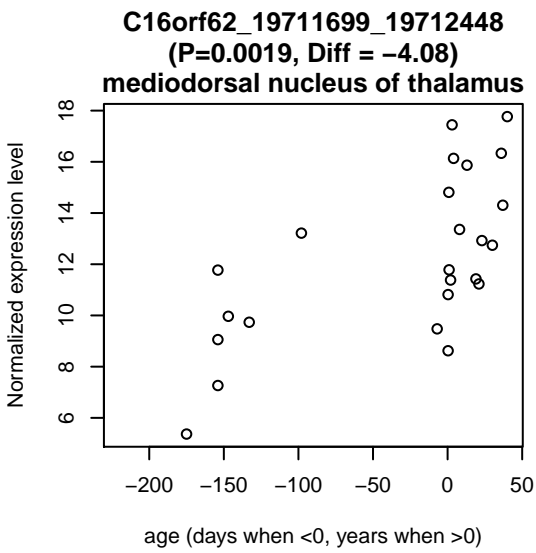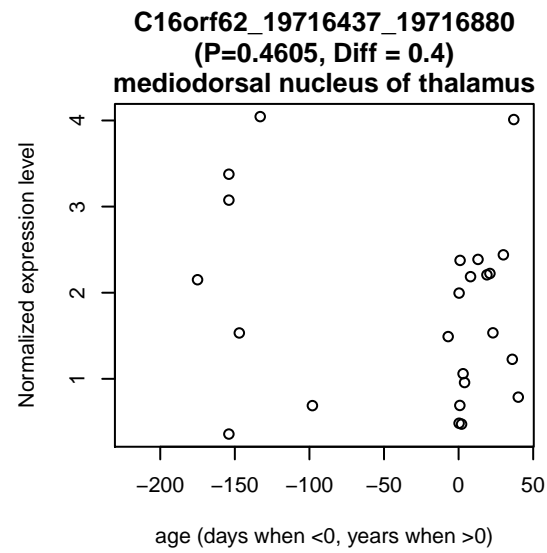

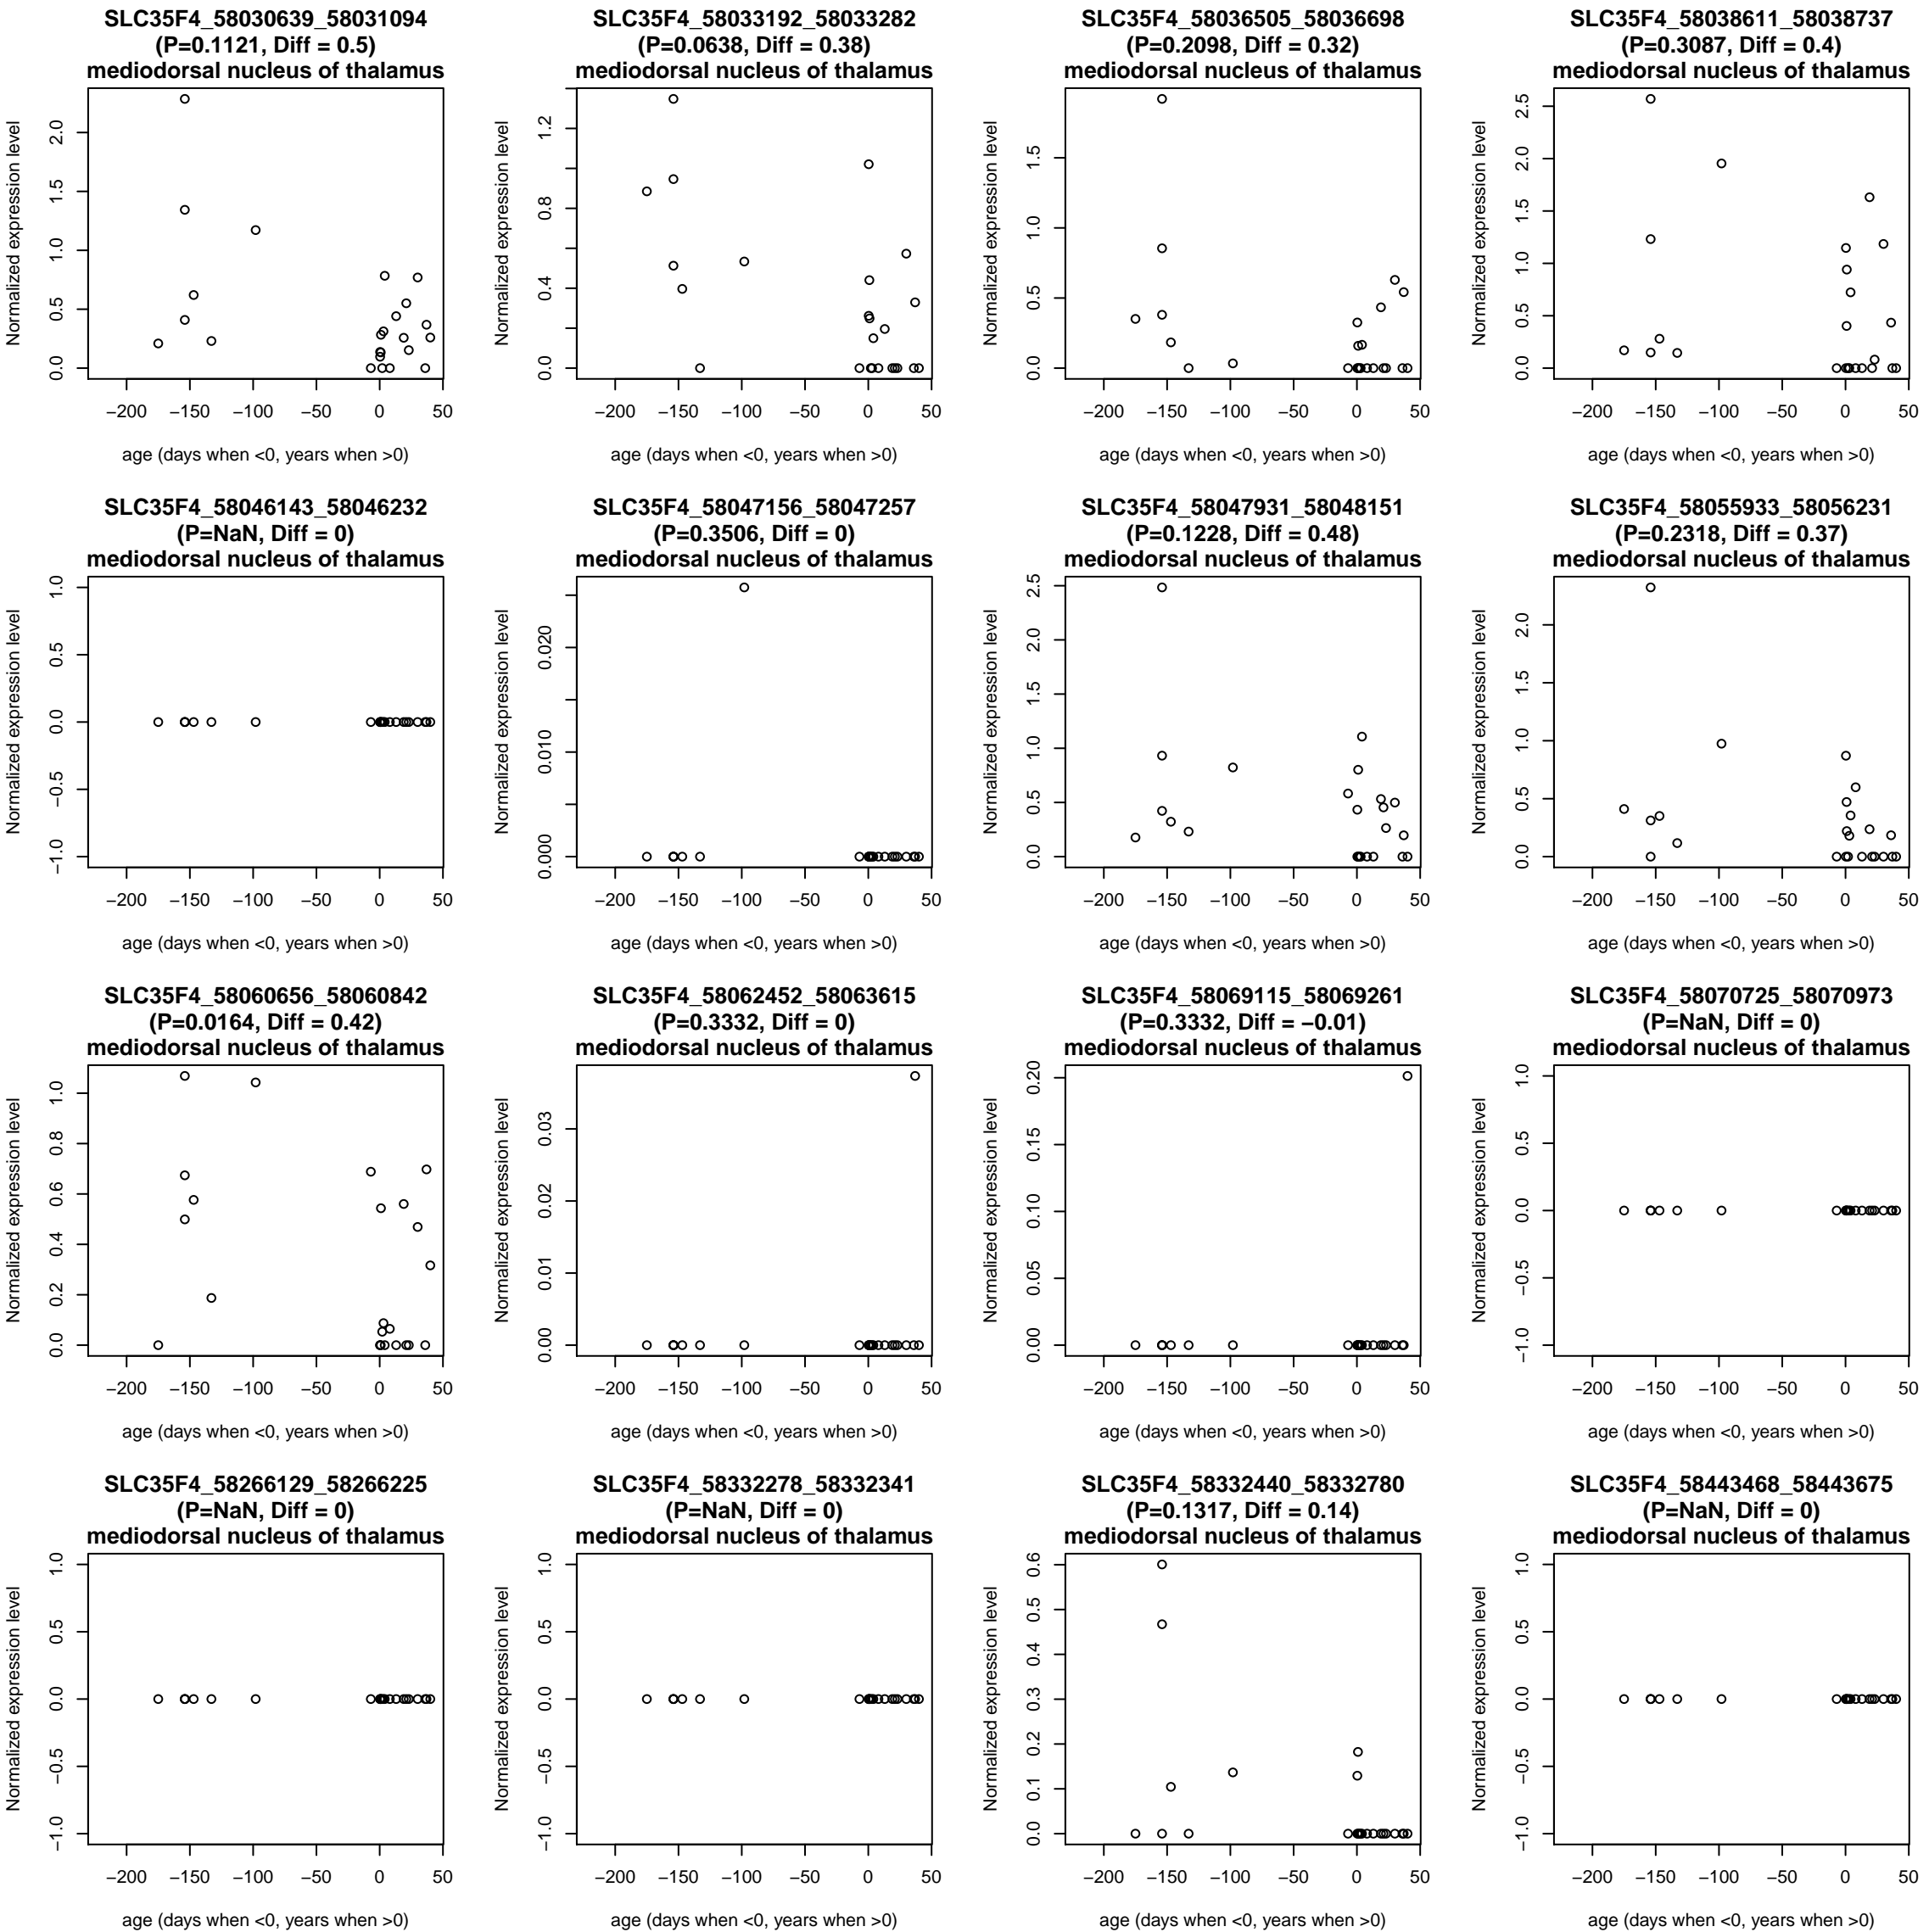

**SLC35F4\_58448630\_58448912**  
**(P=0.812, Diff = 0.01)**  
**mediodorsal nucleus of thalamus**

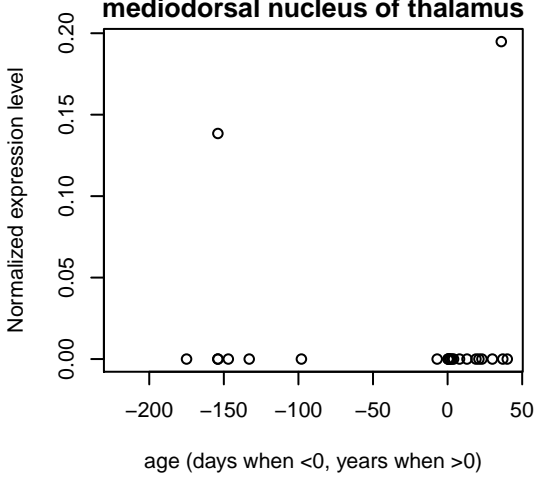

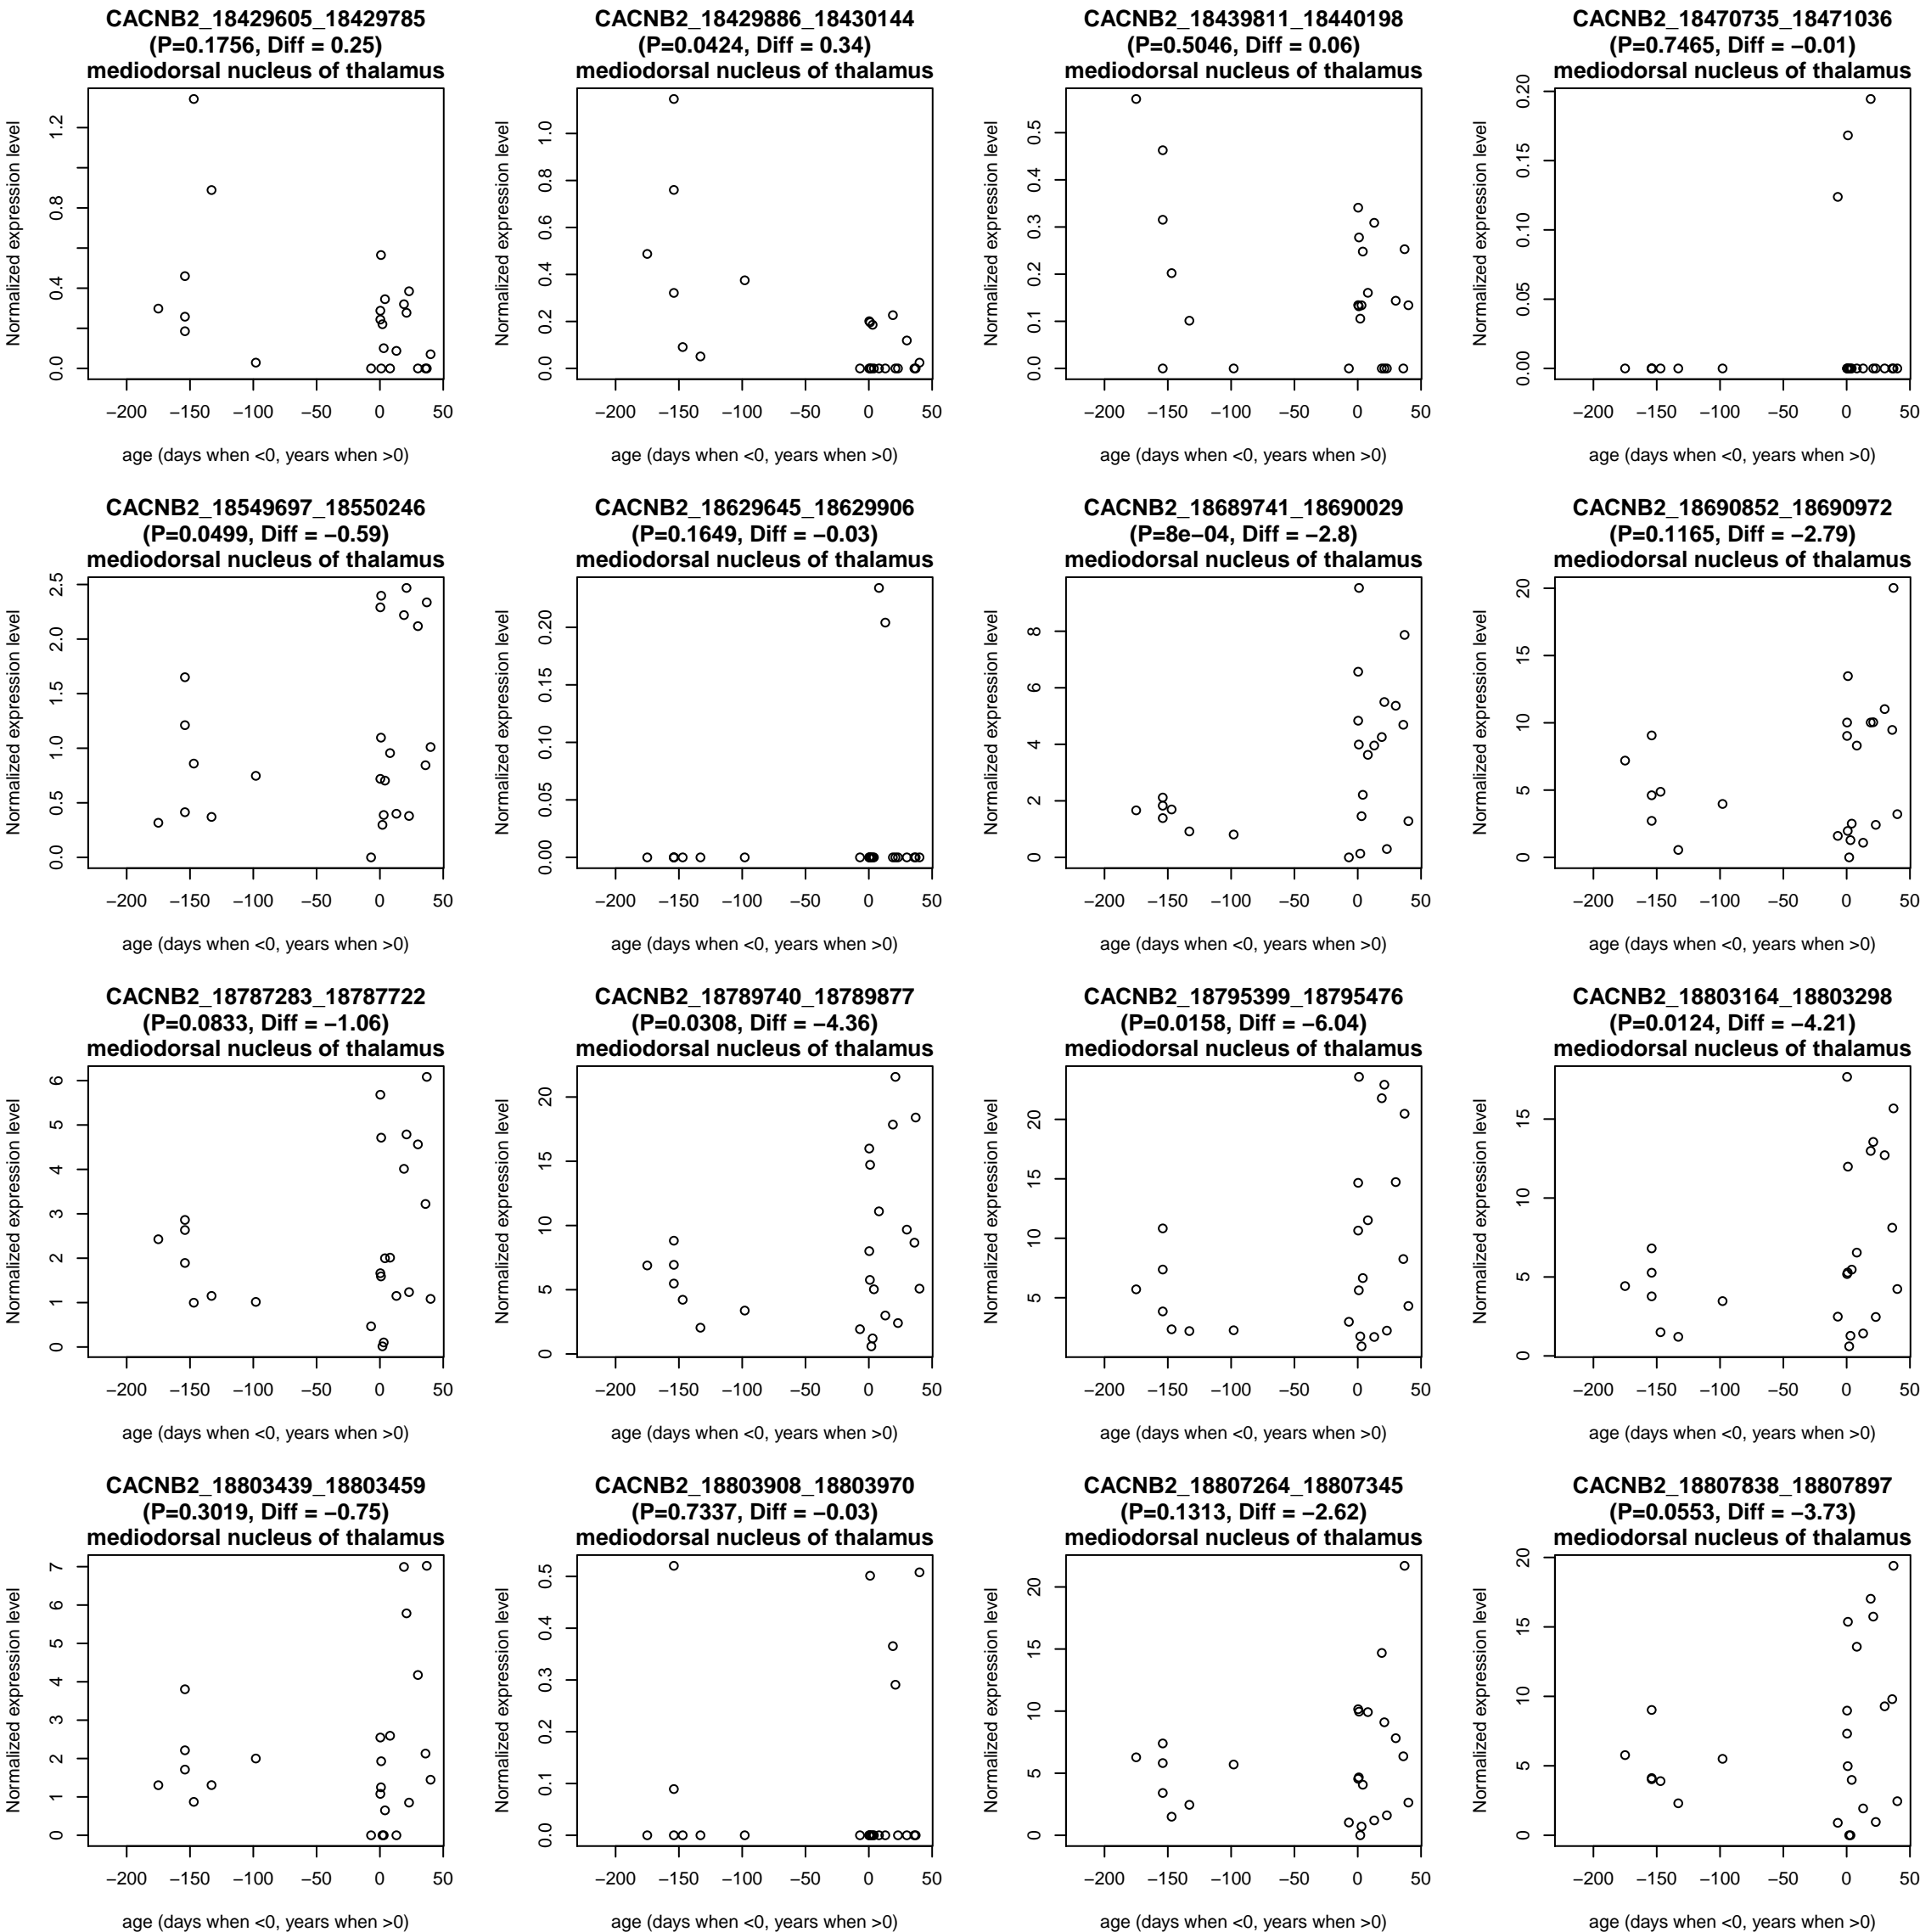

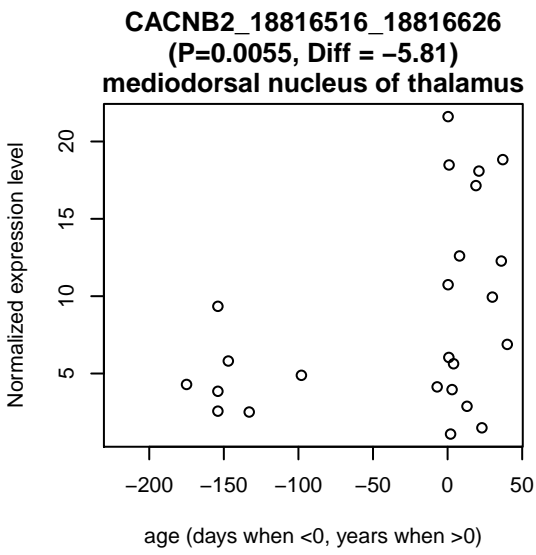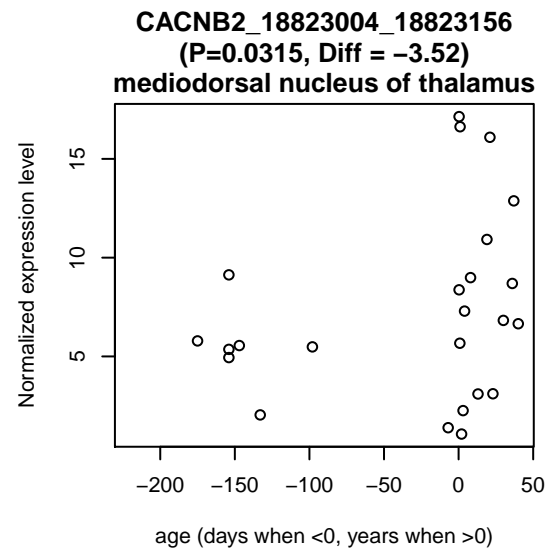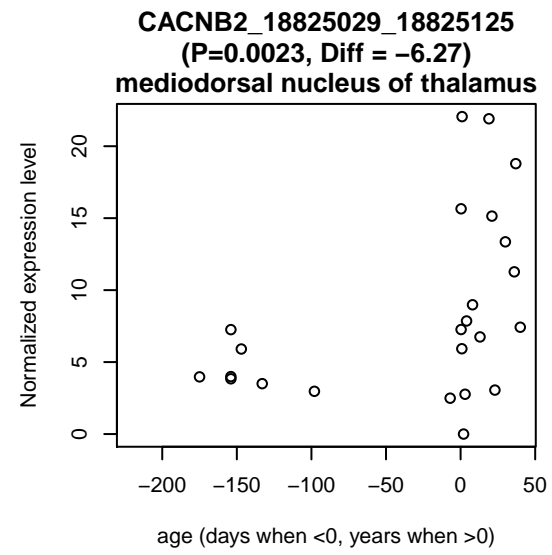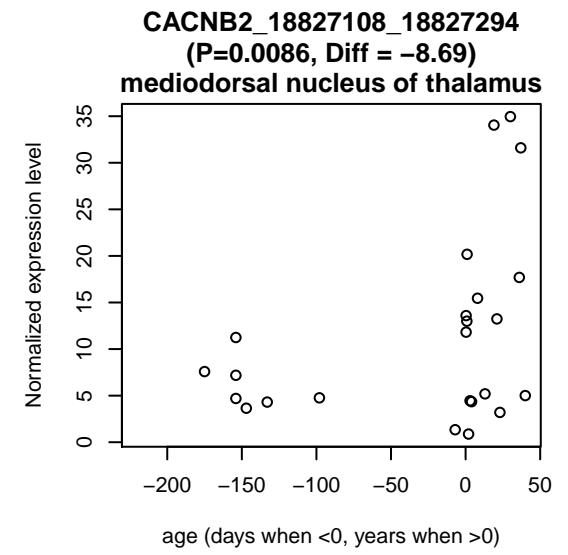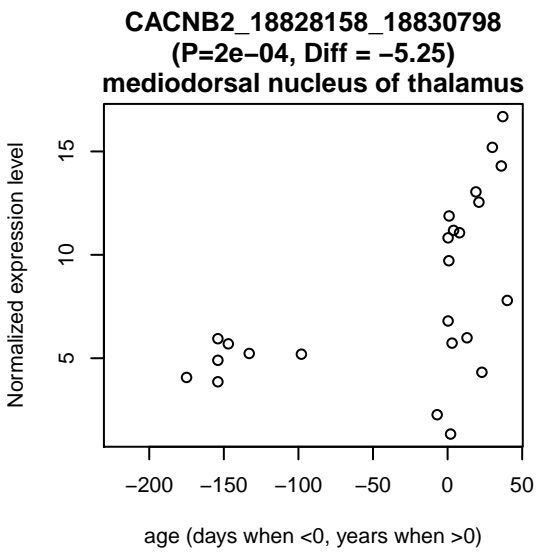

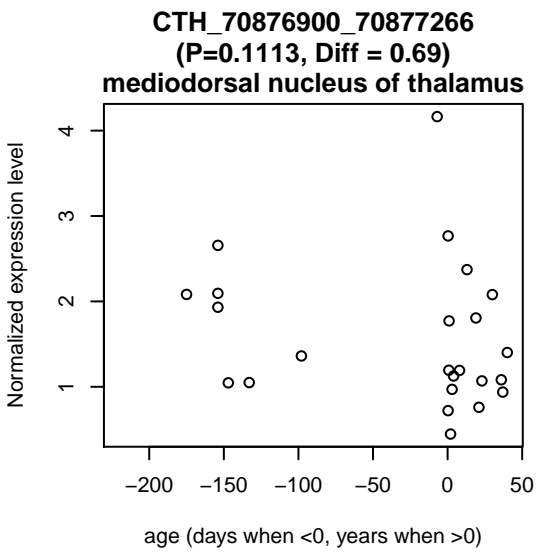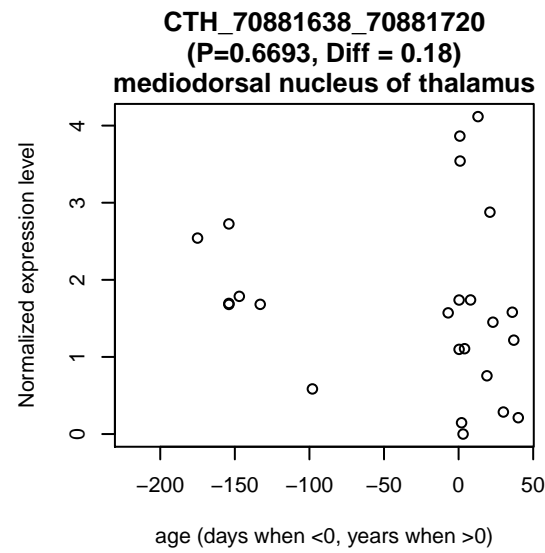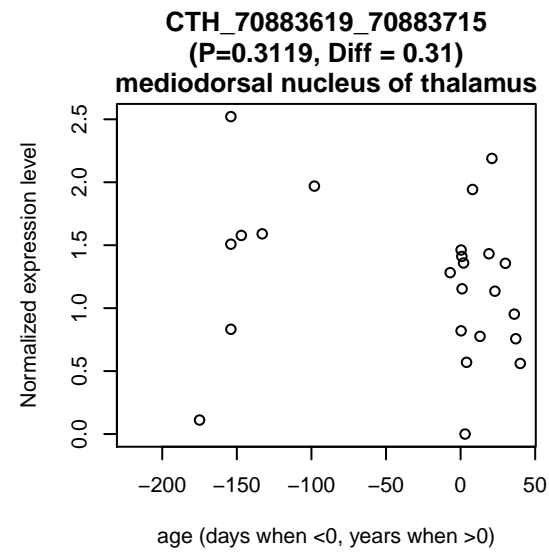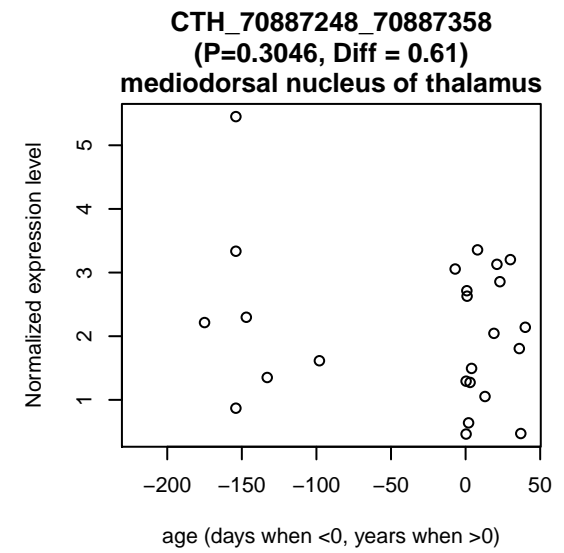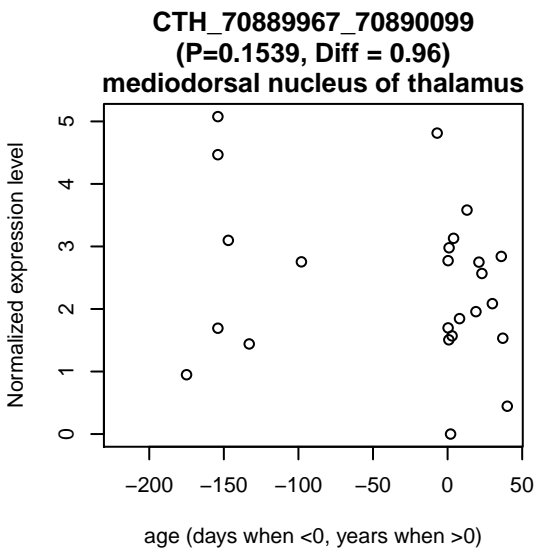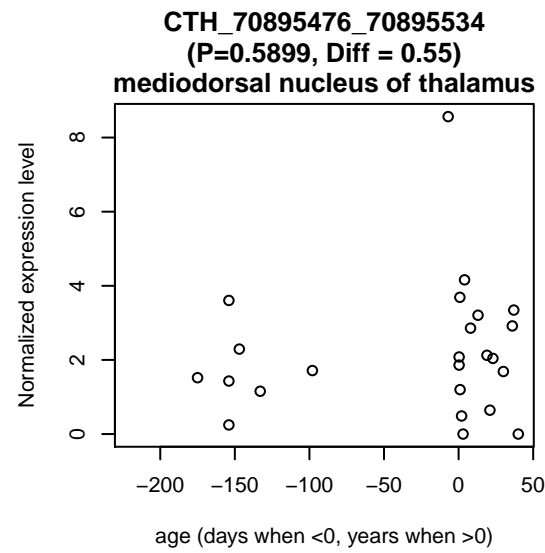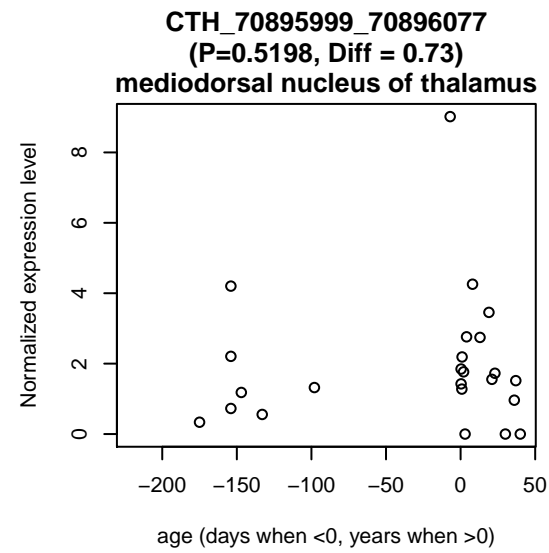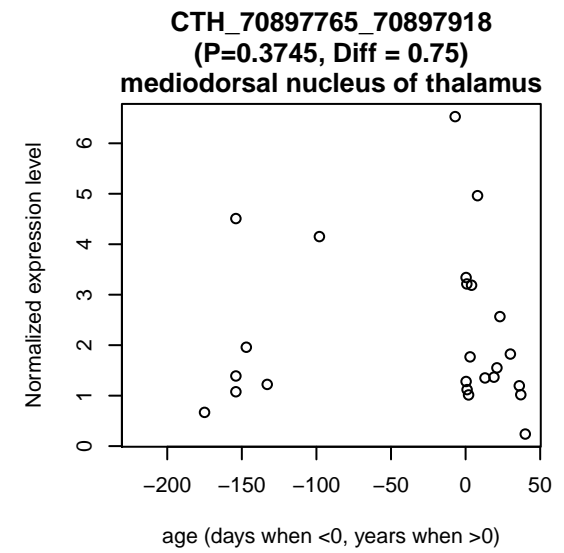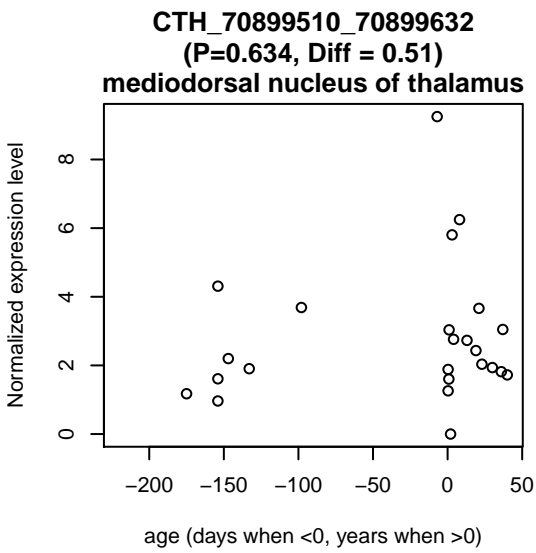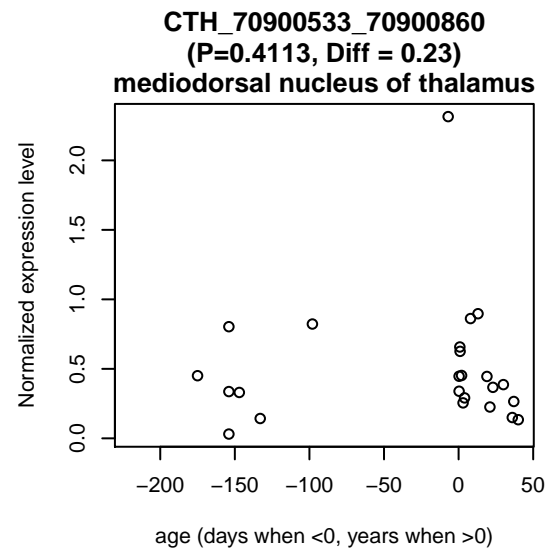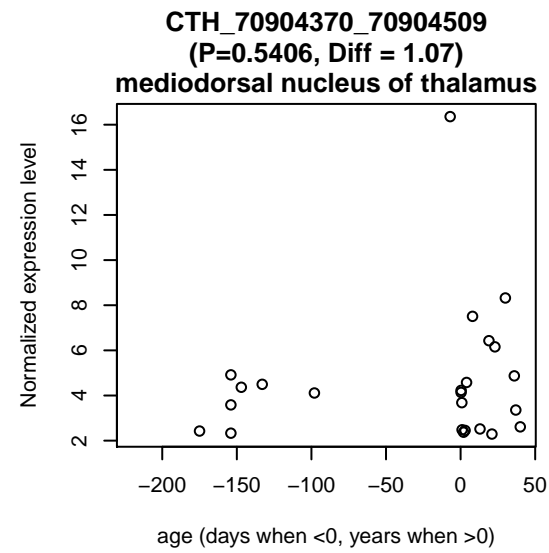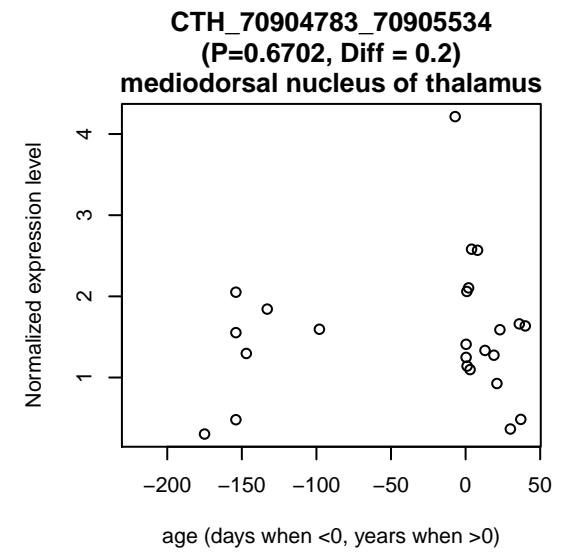

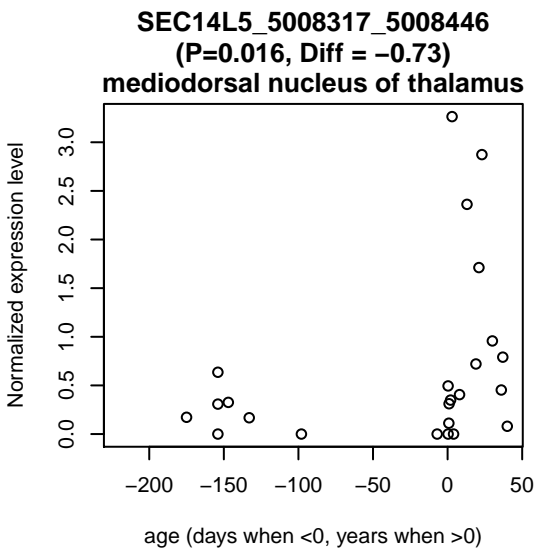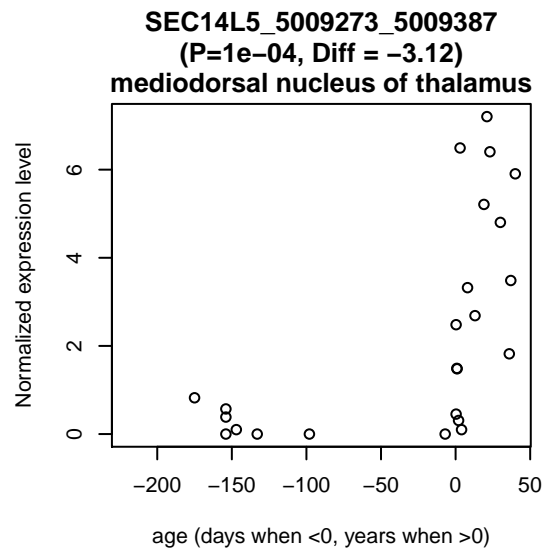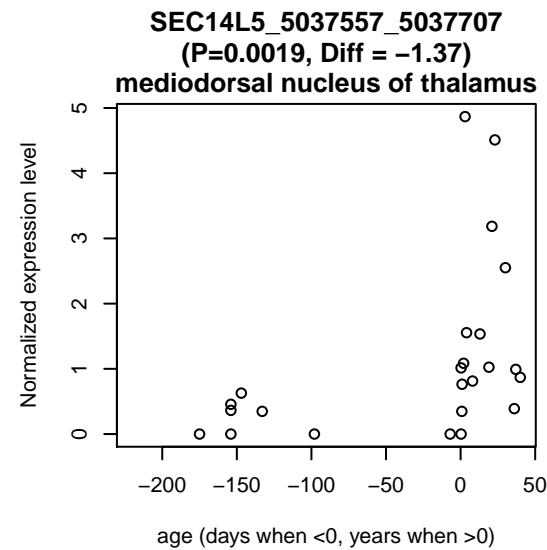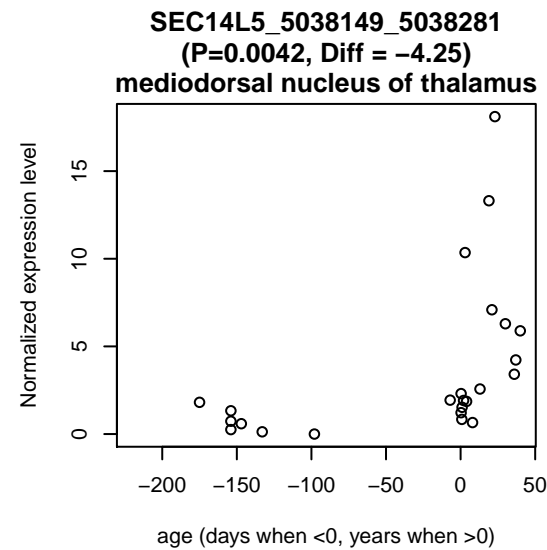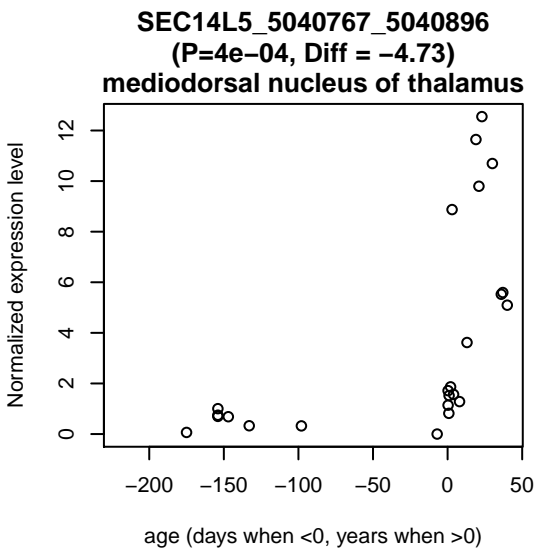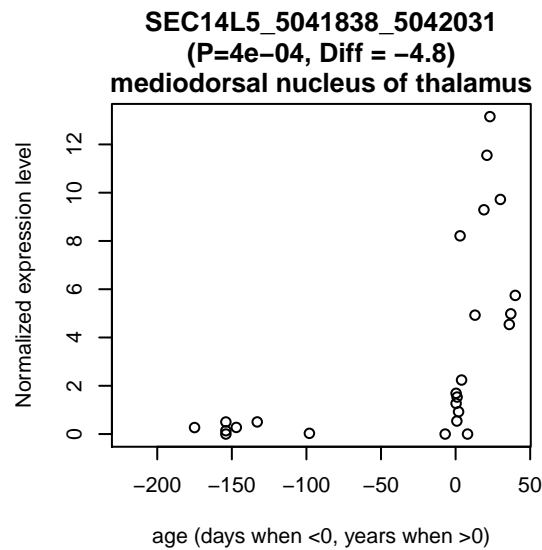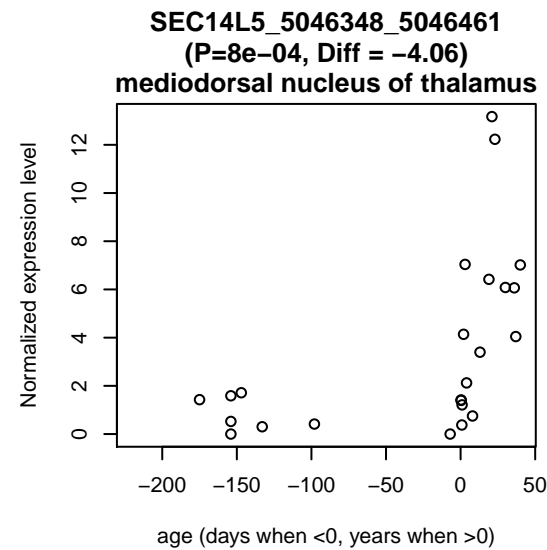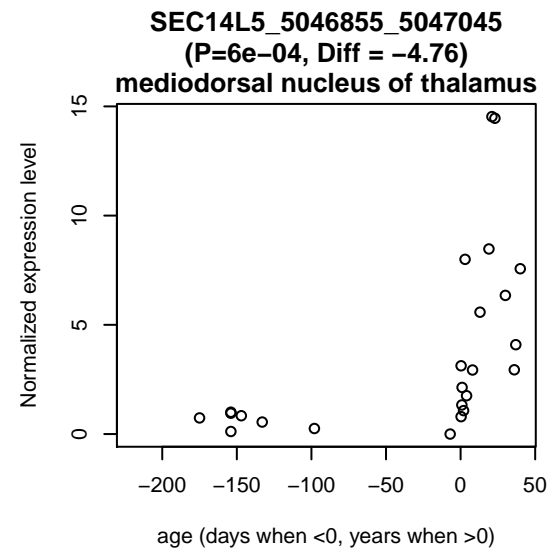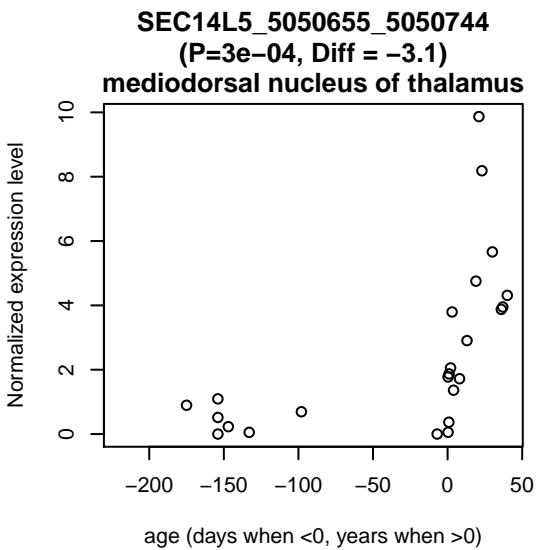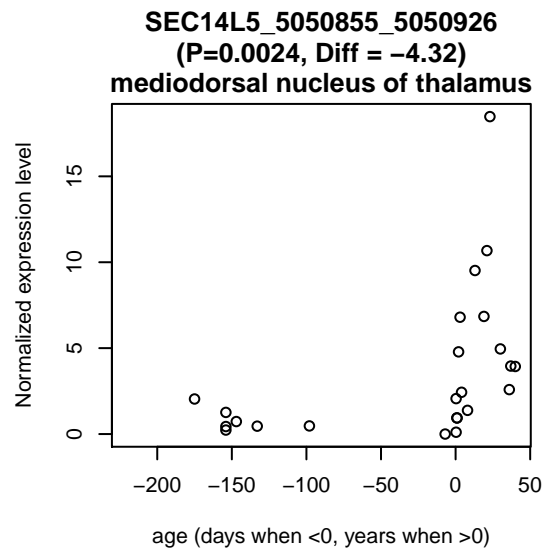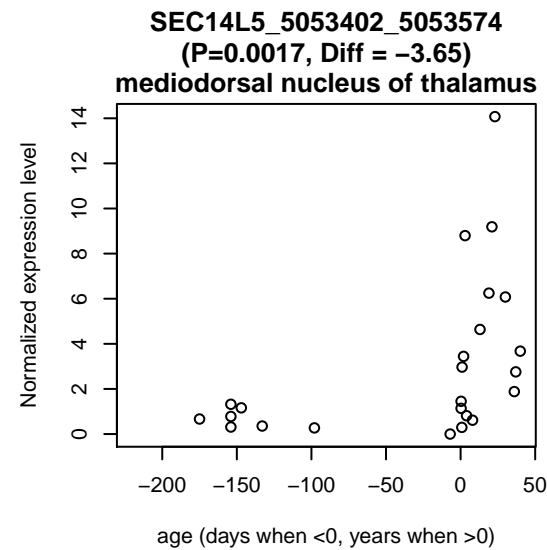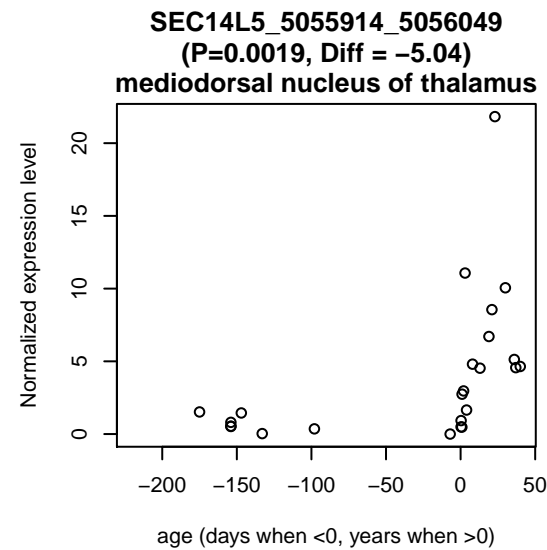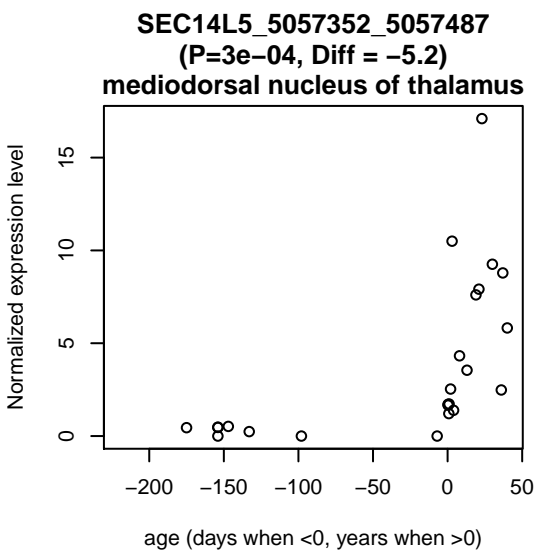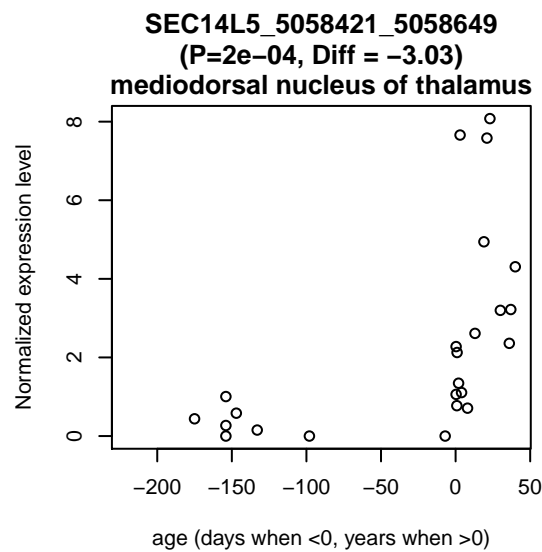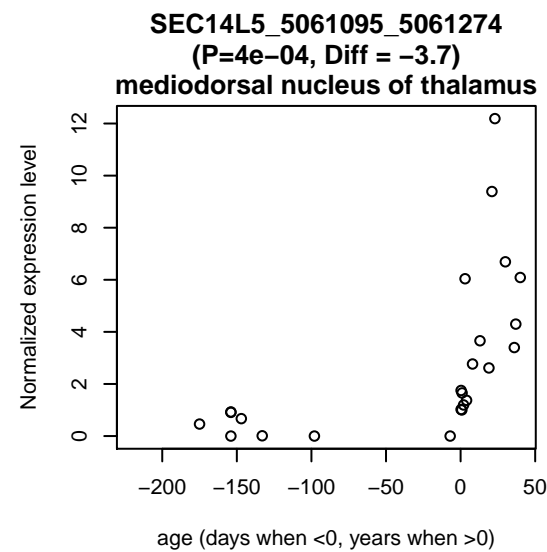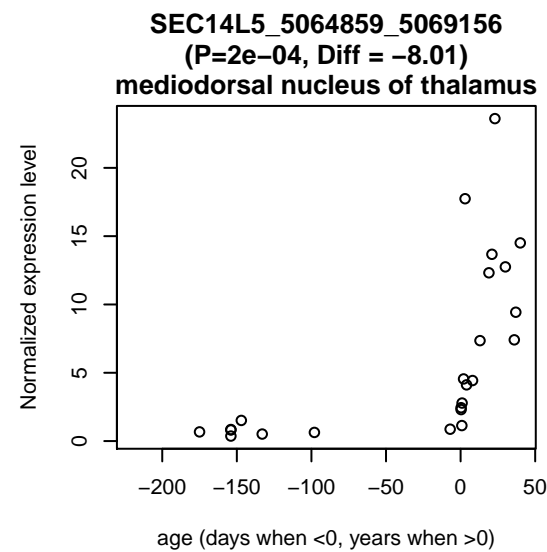



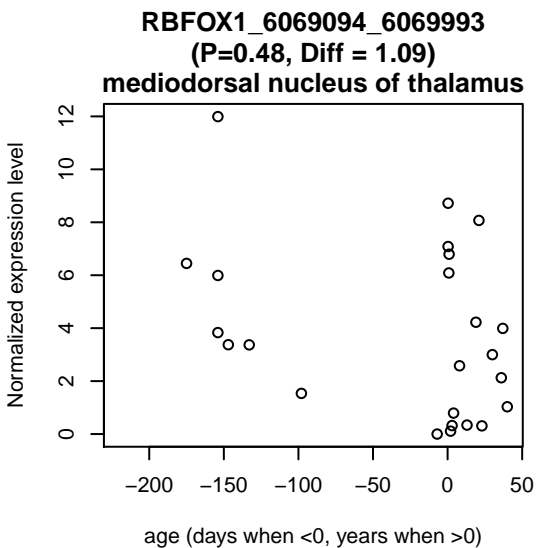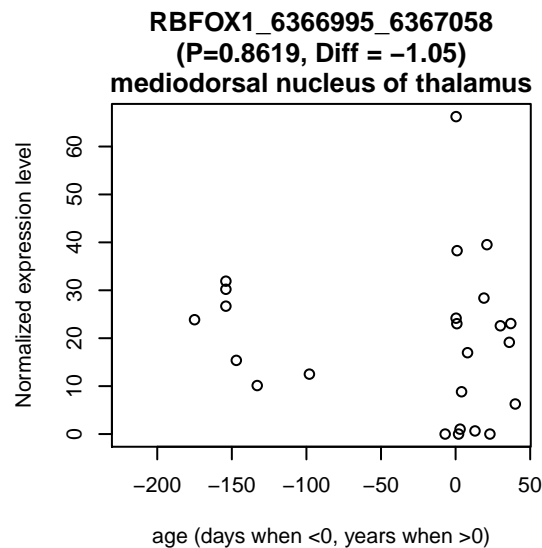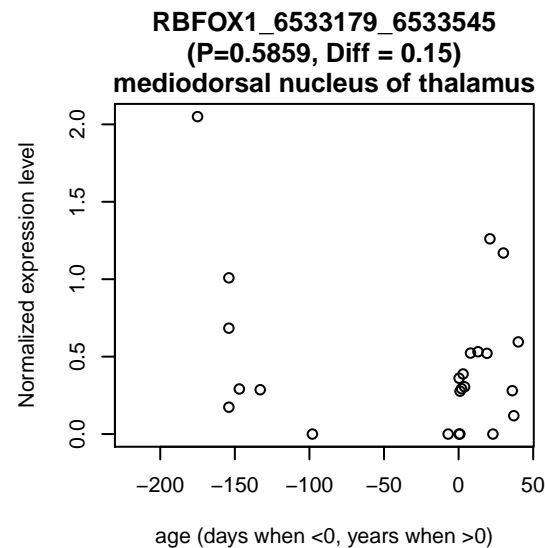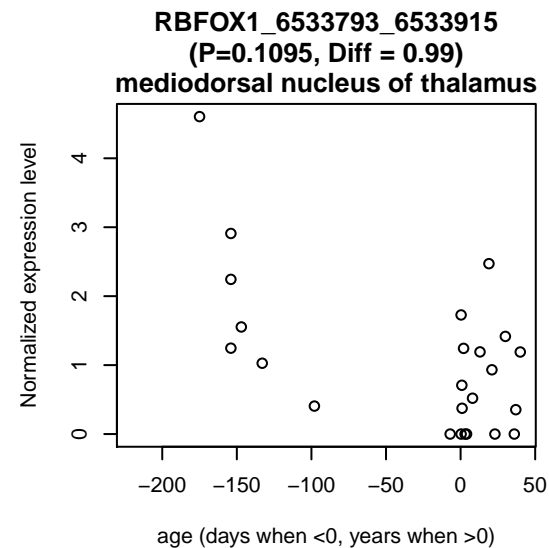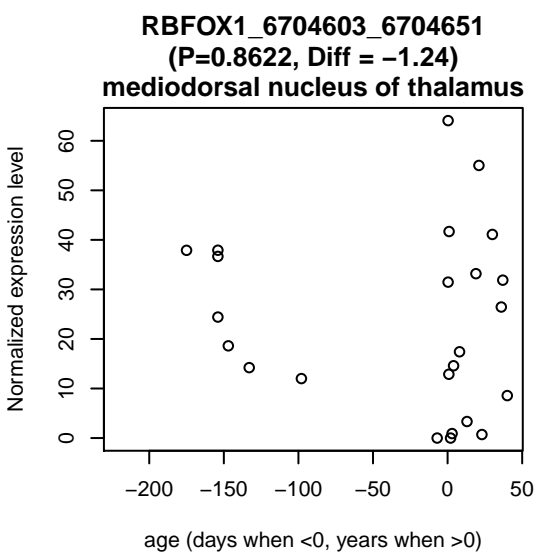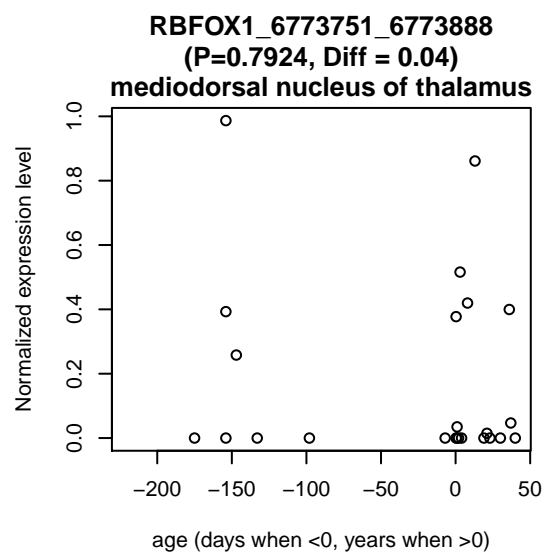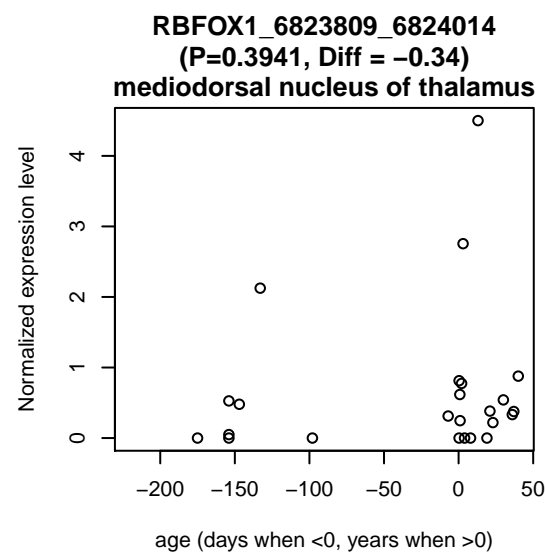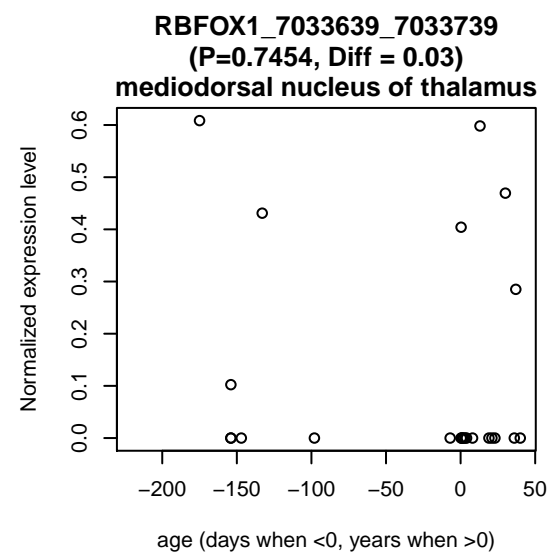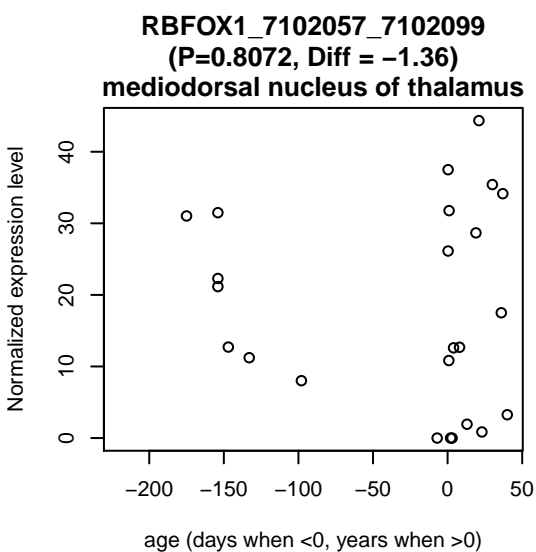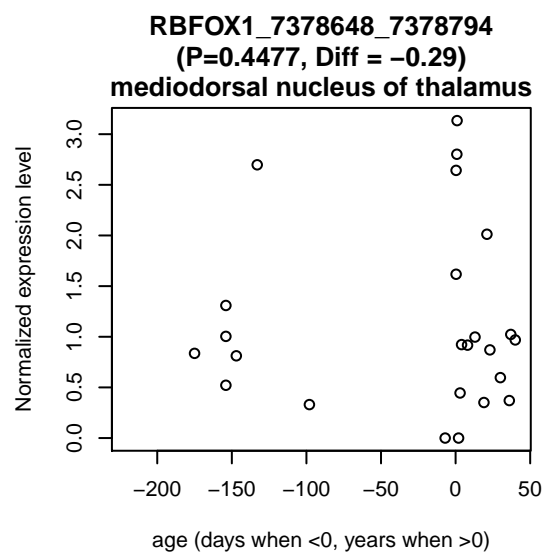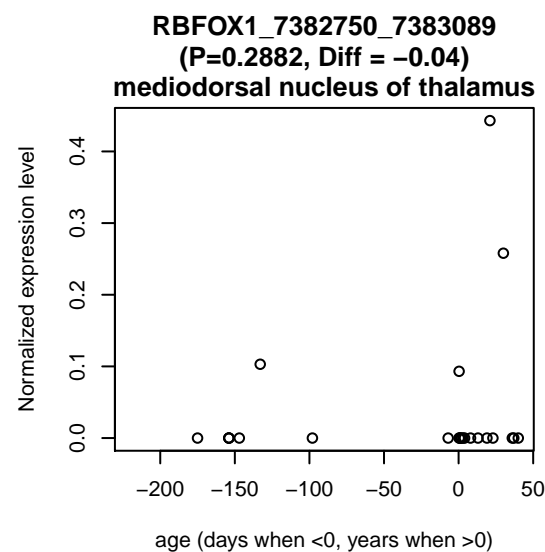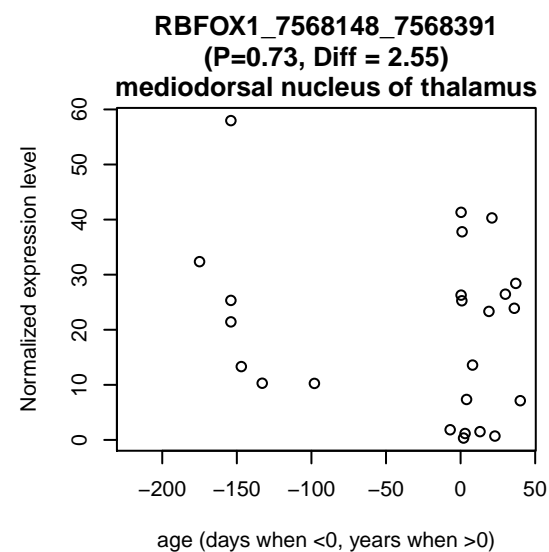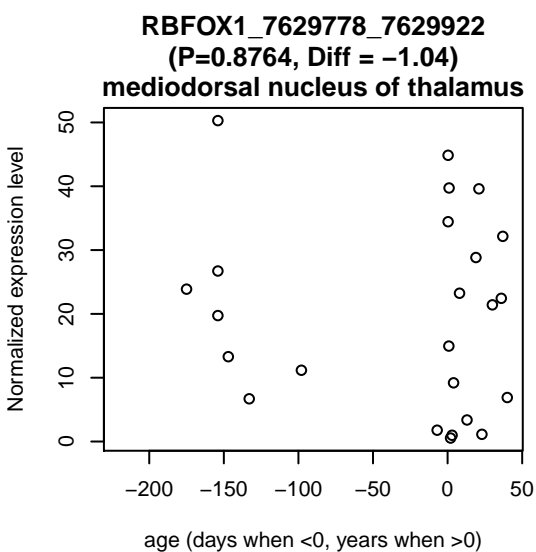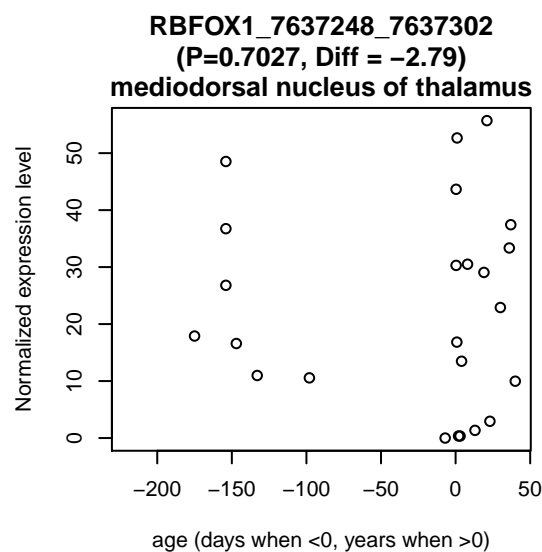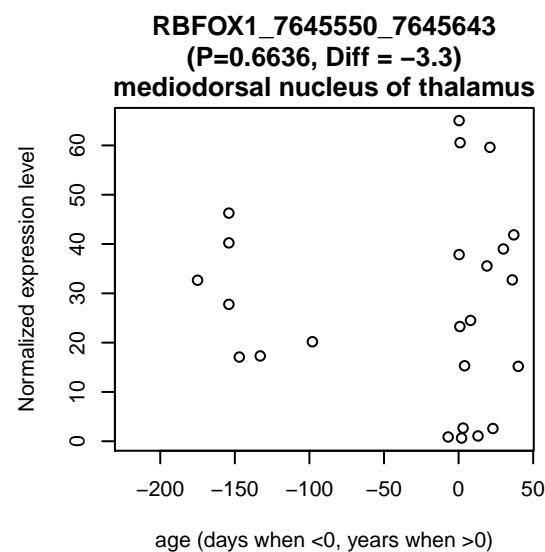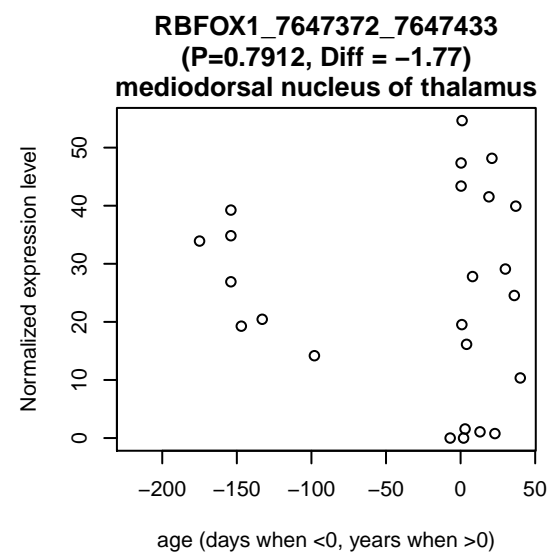

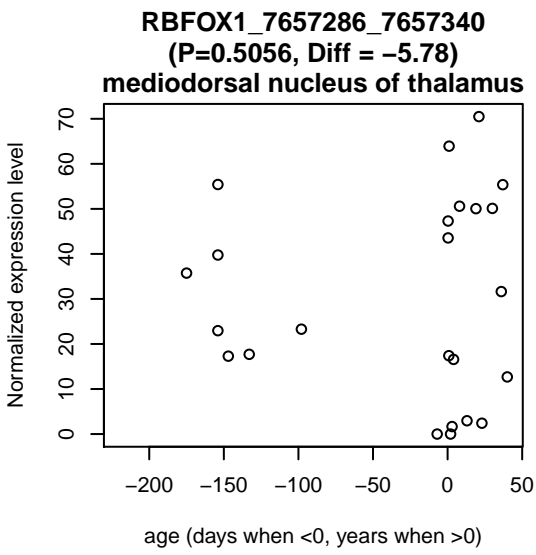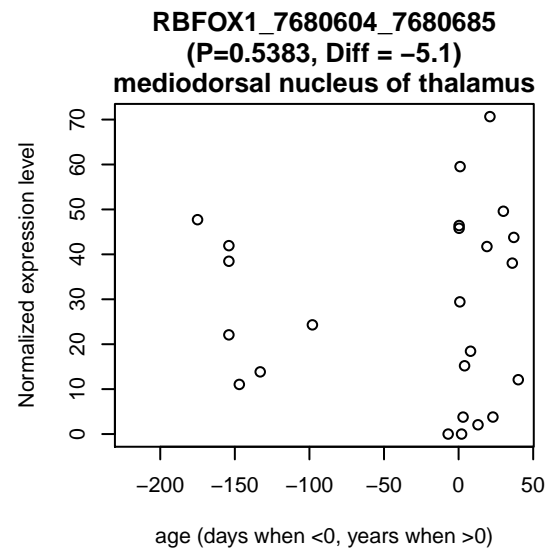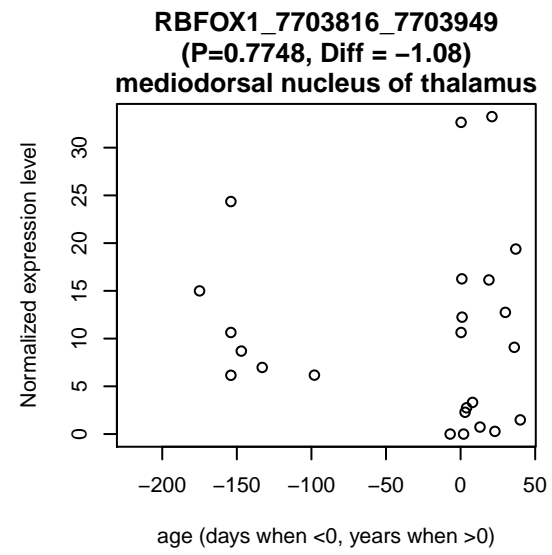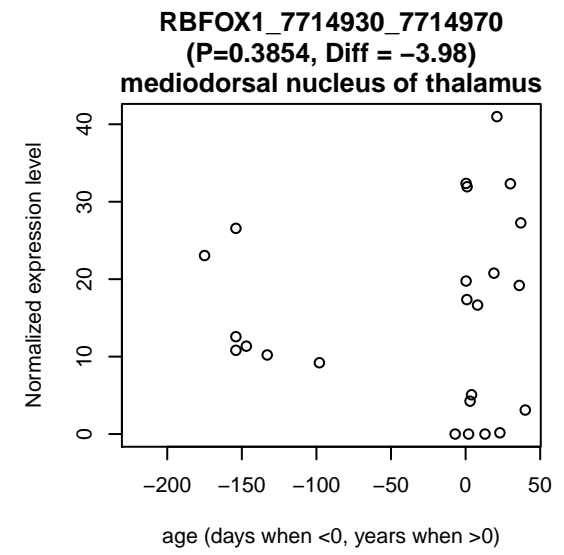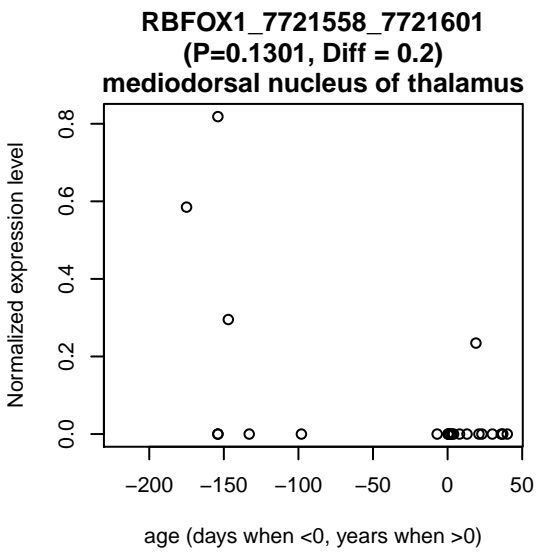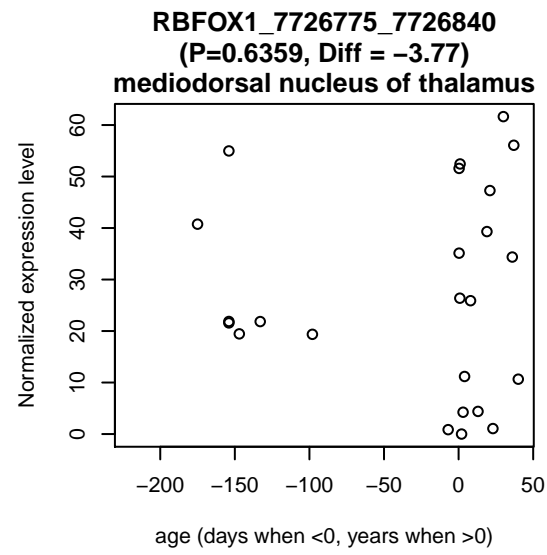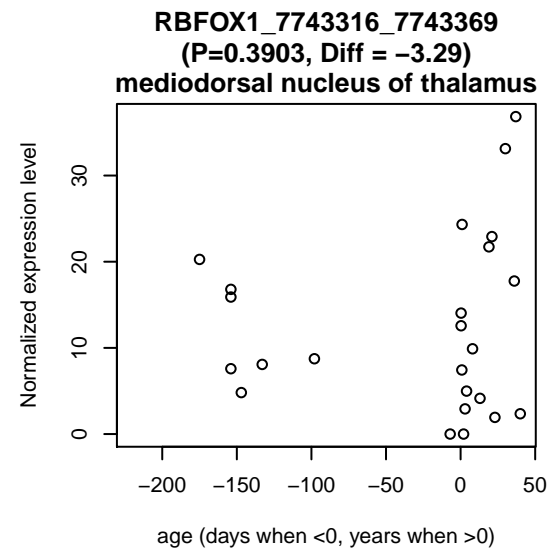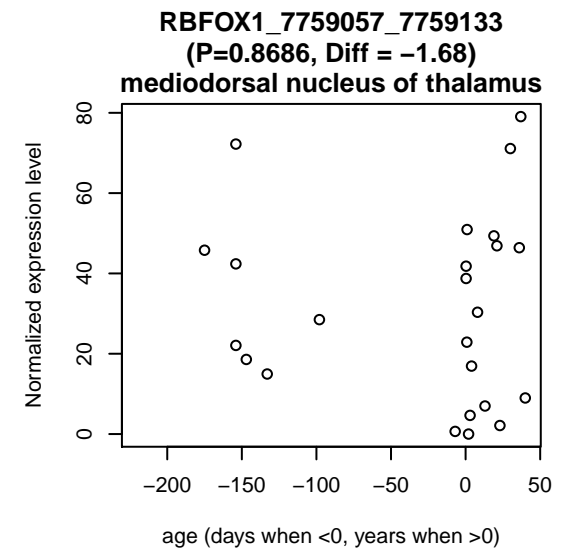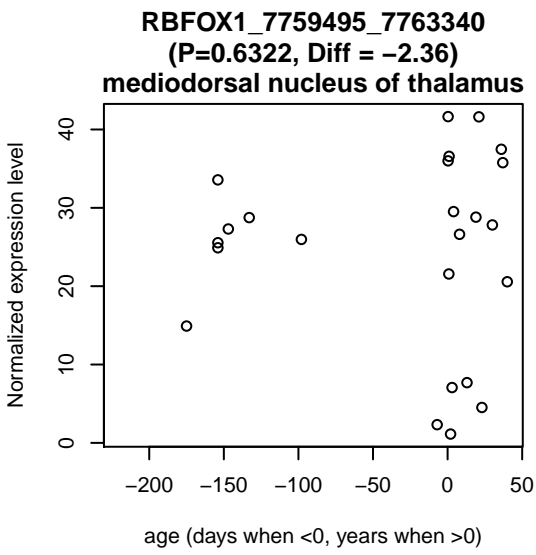

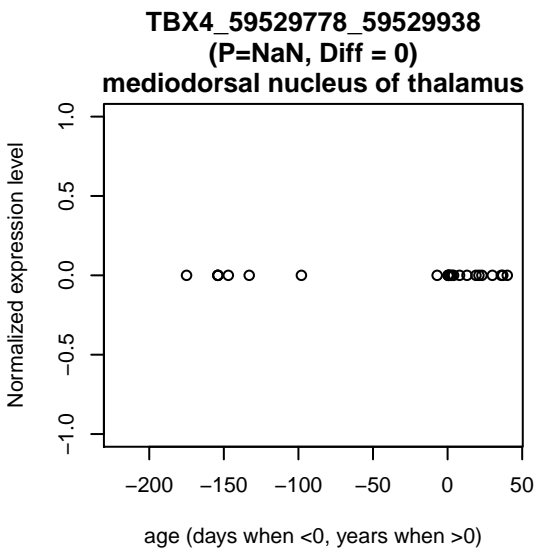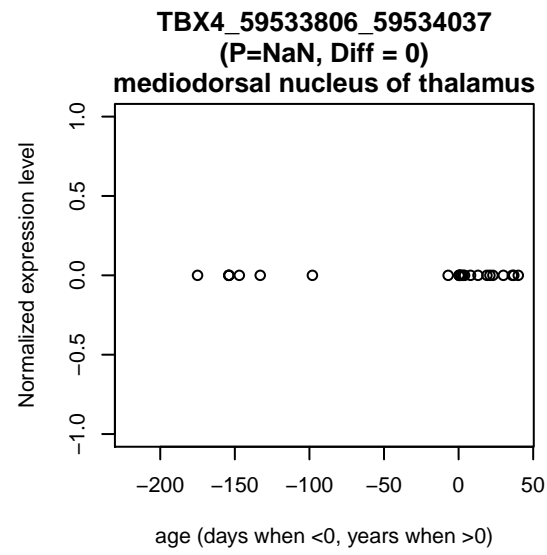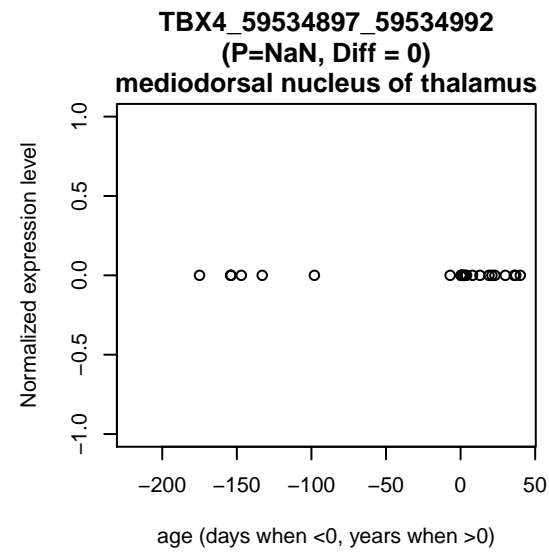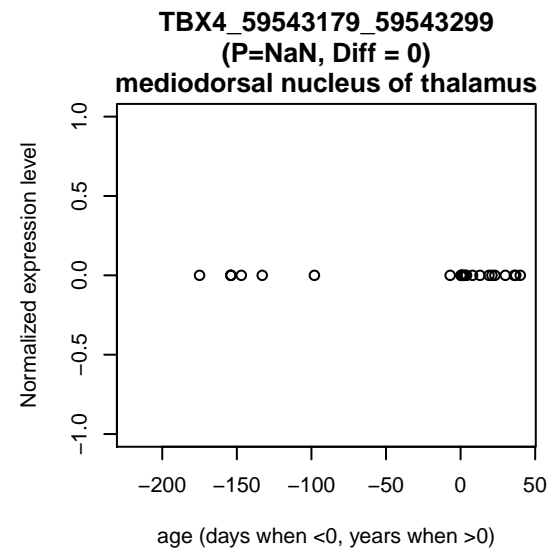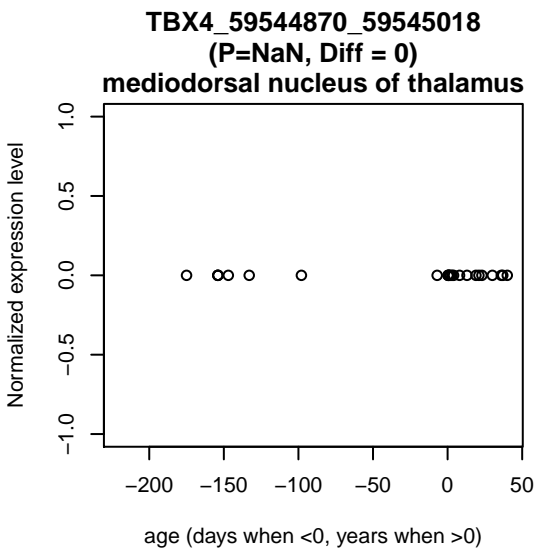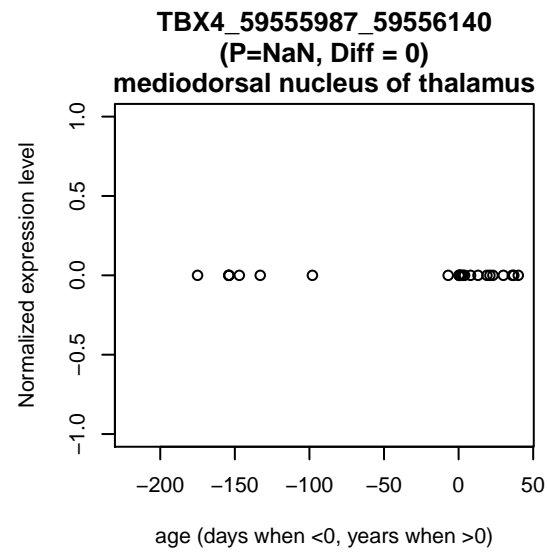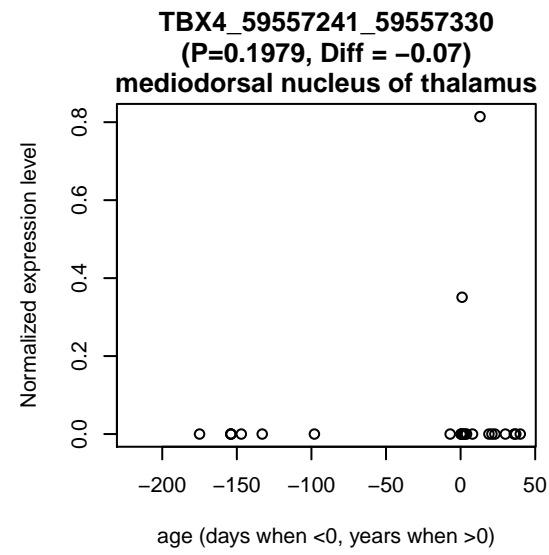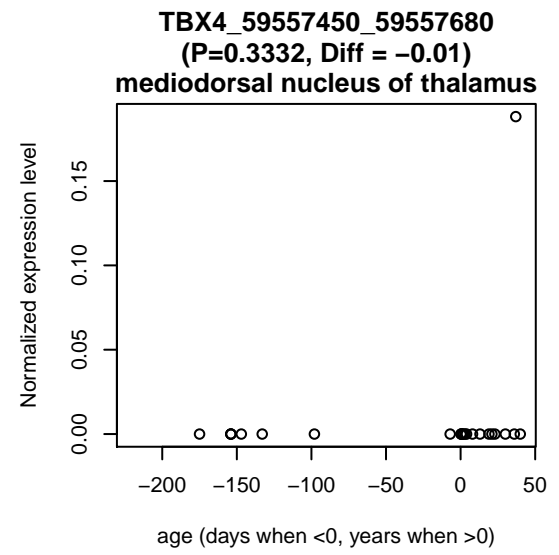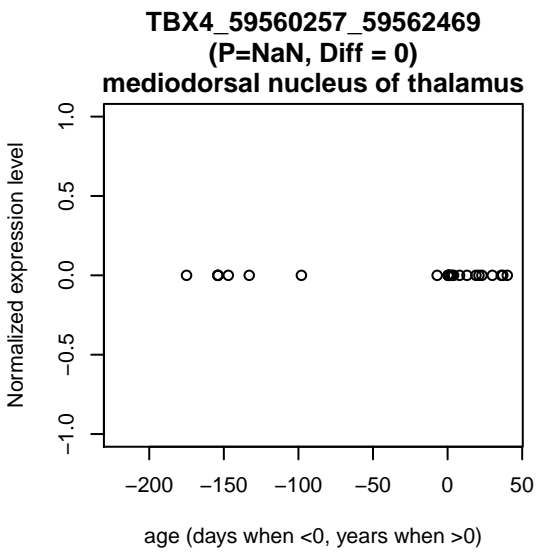

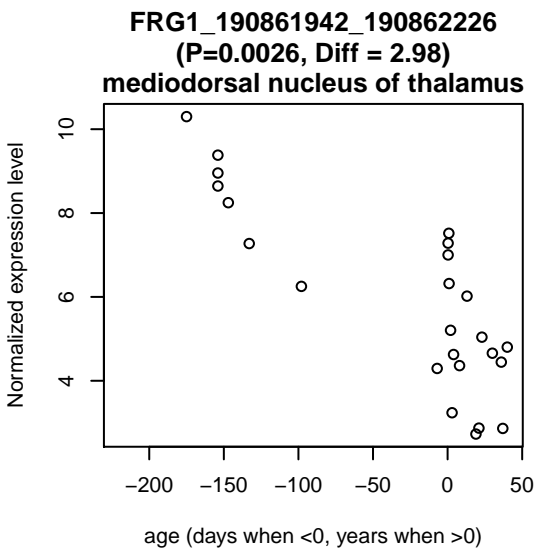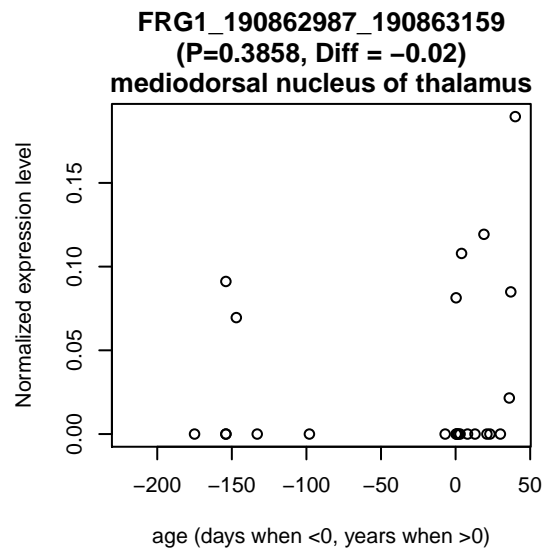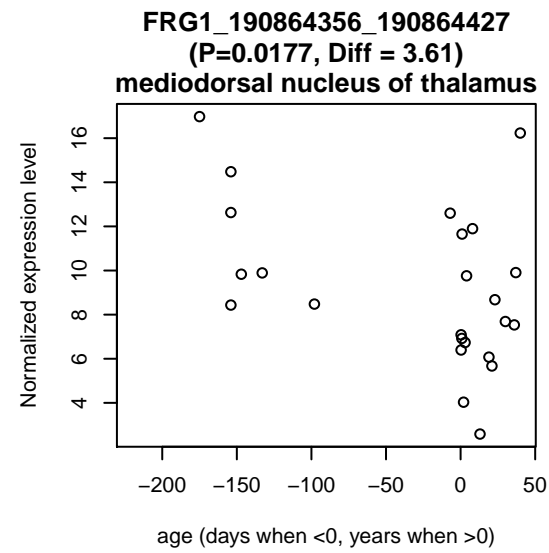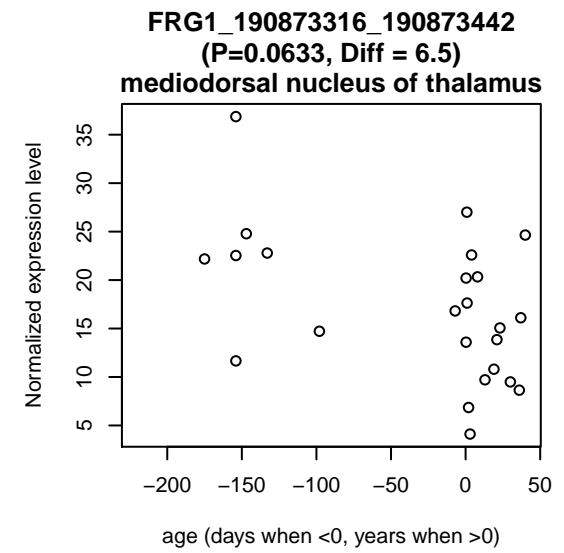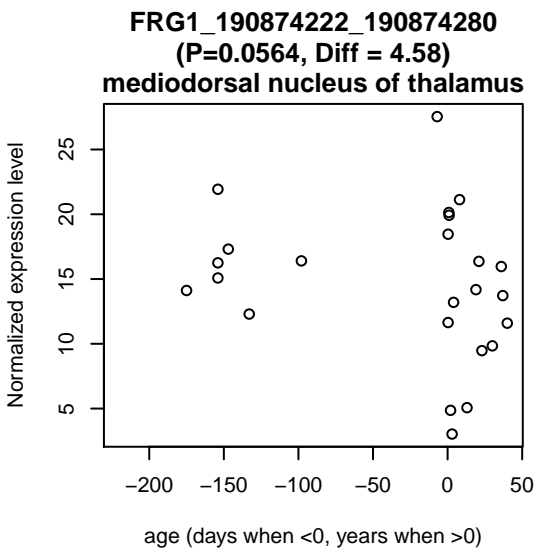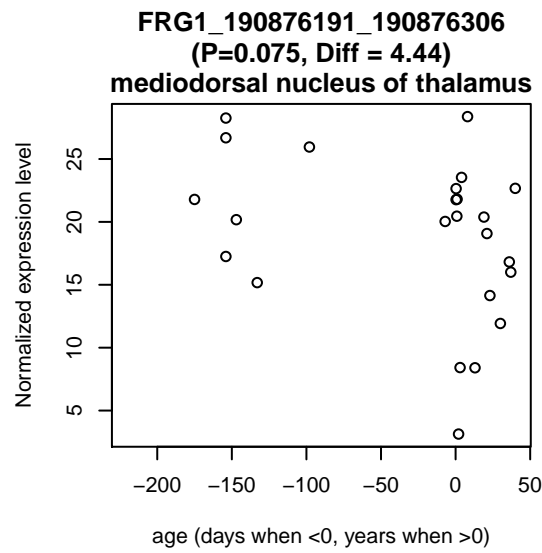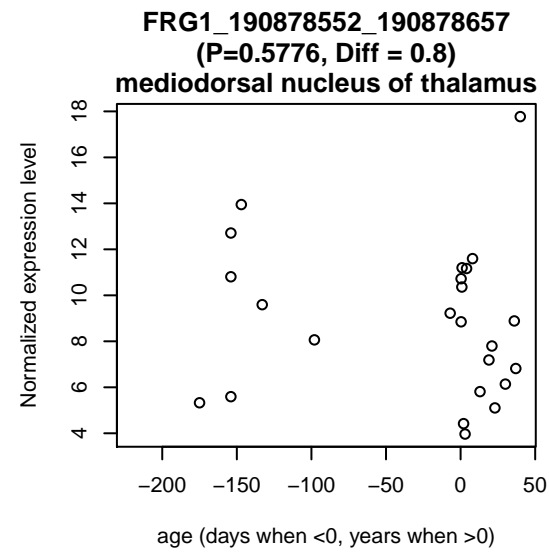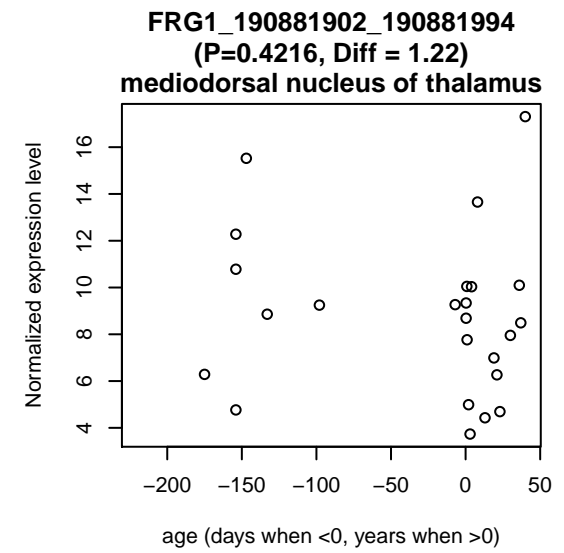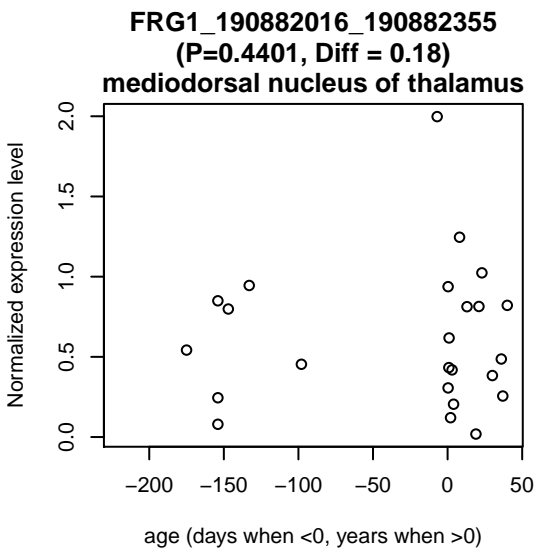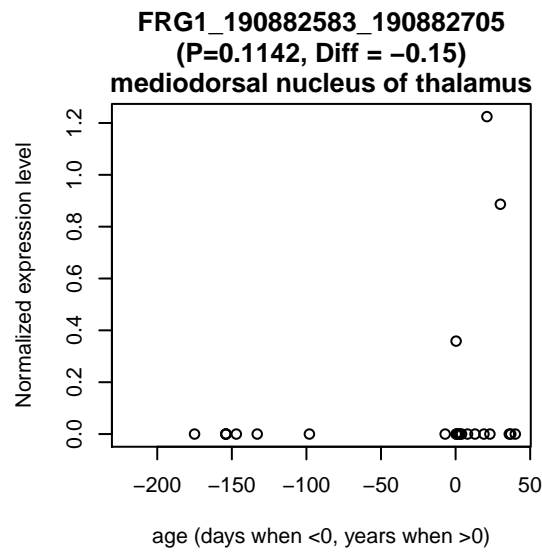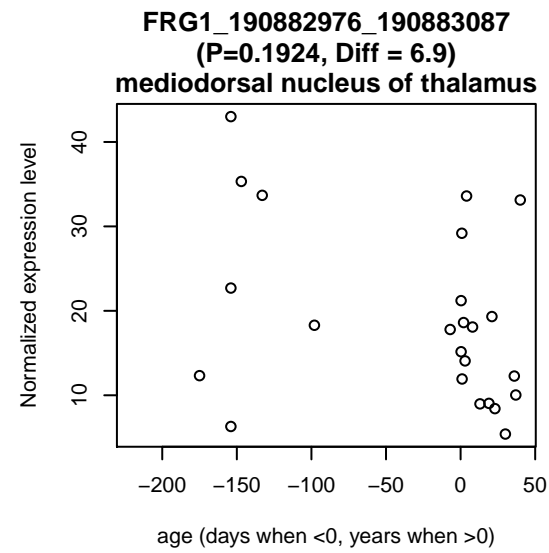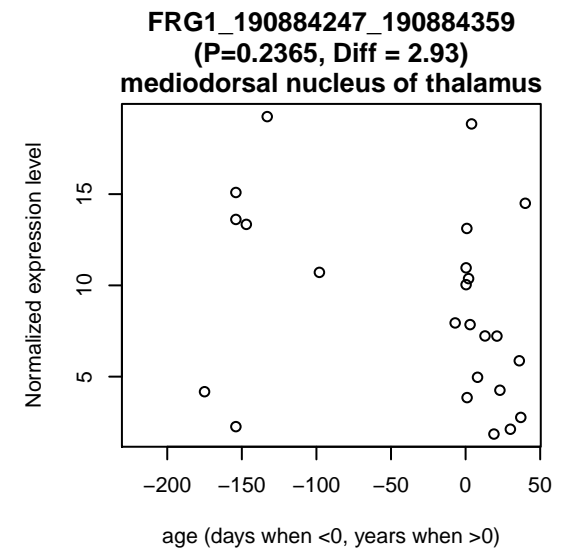

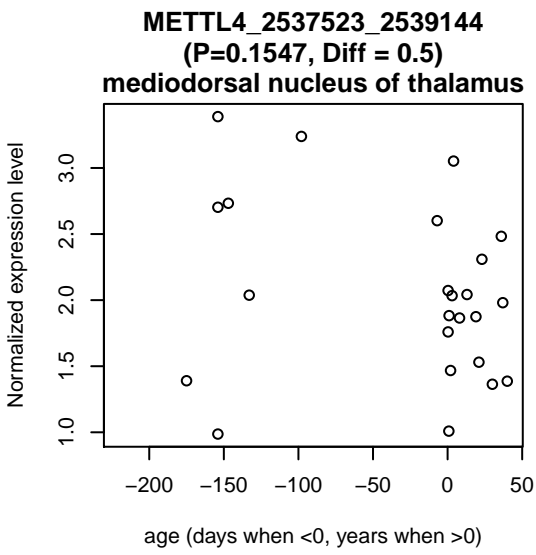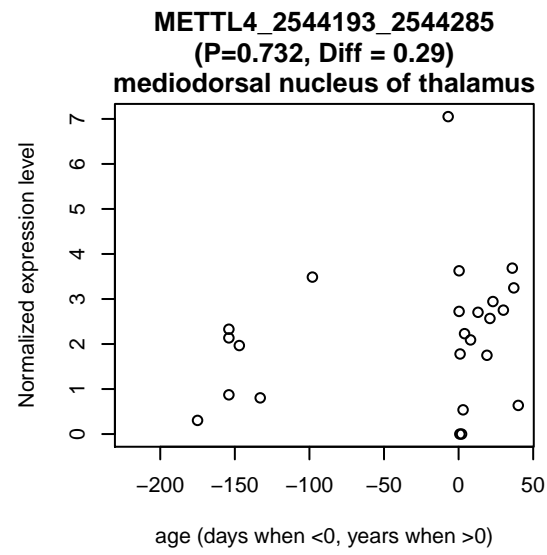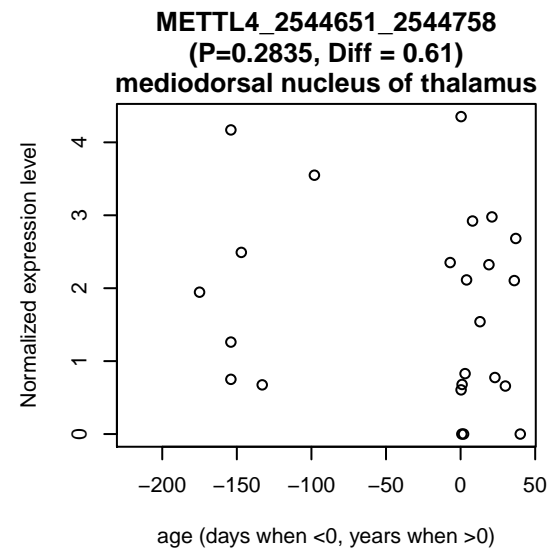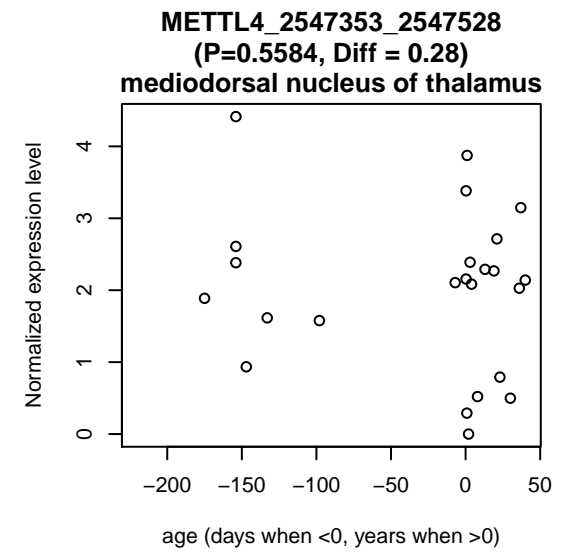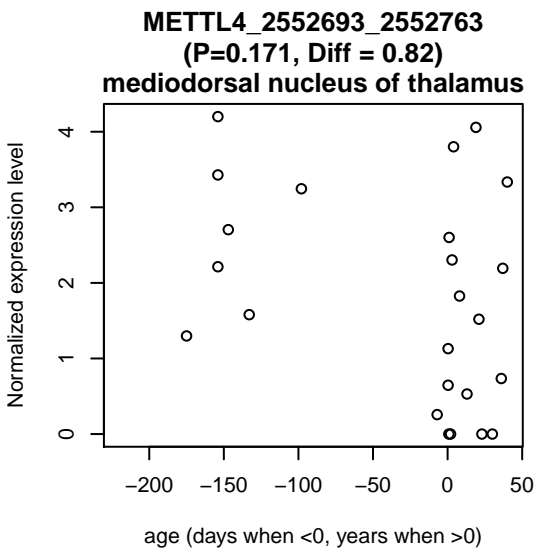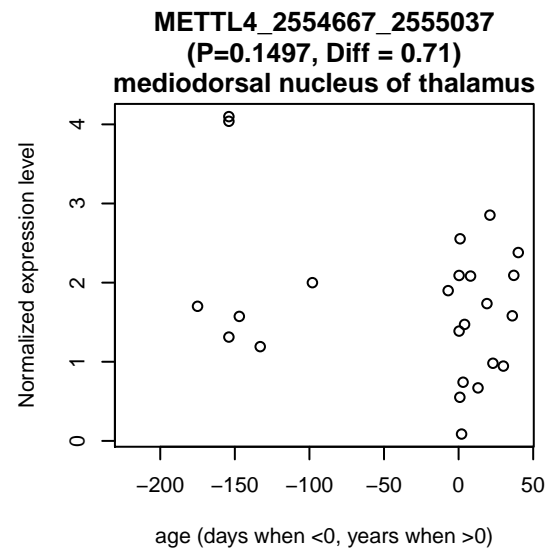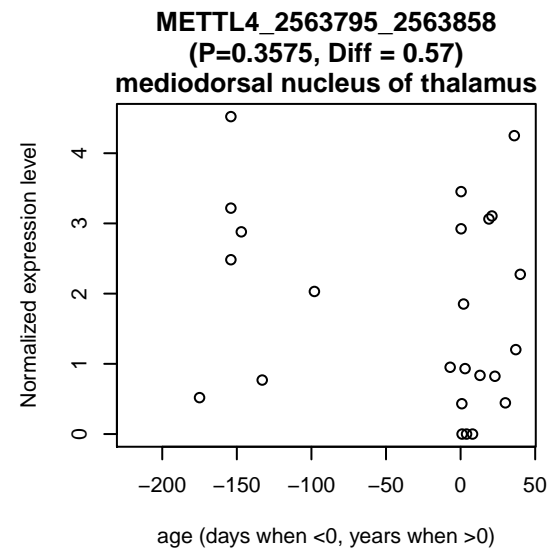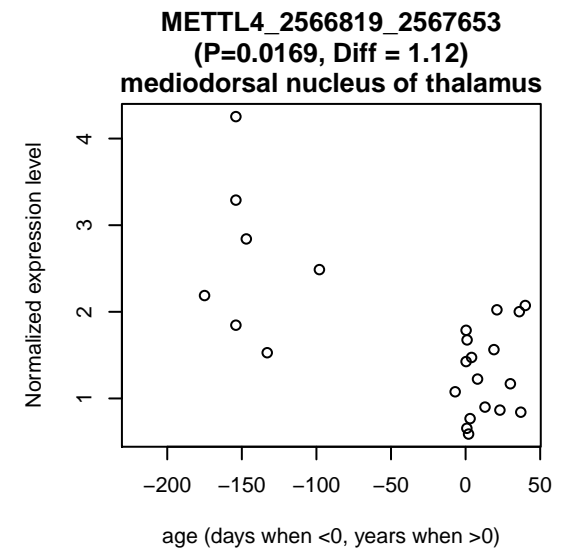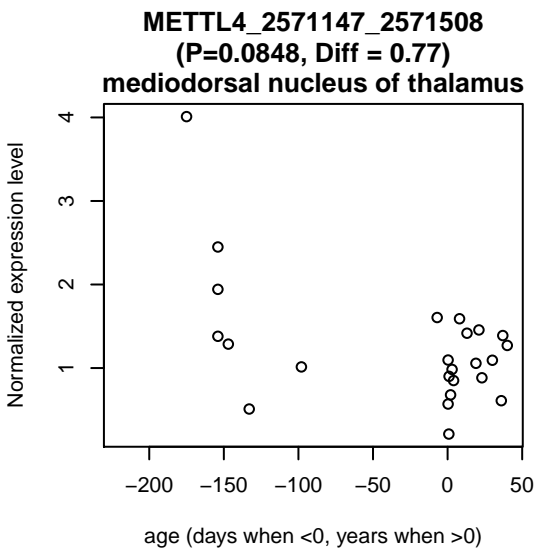

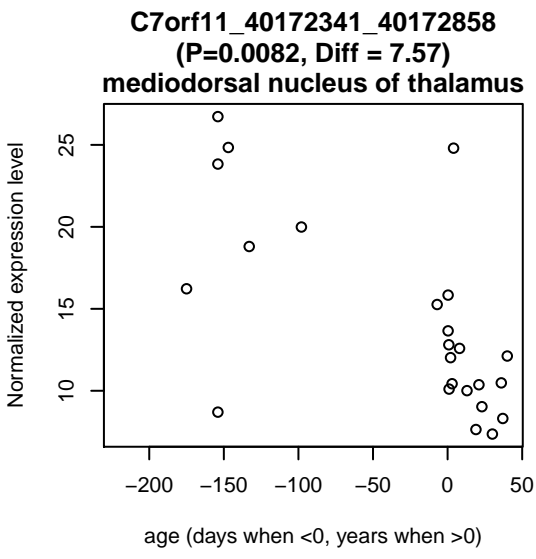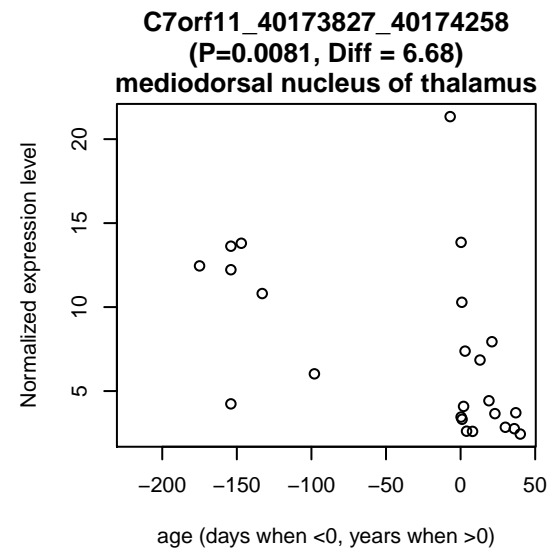

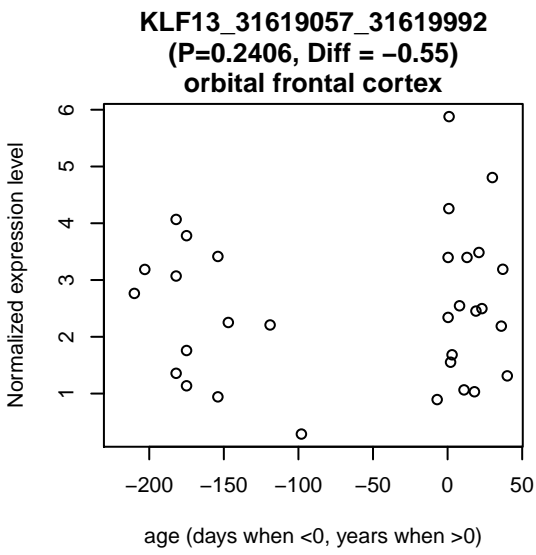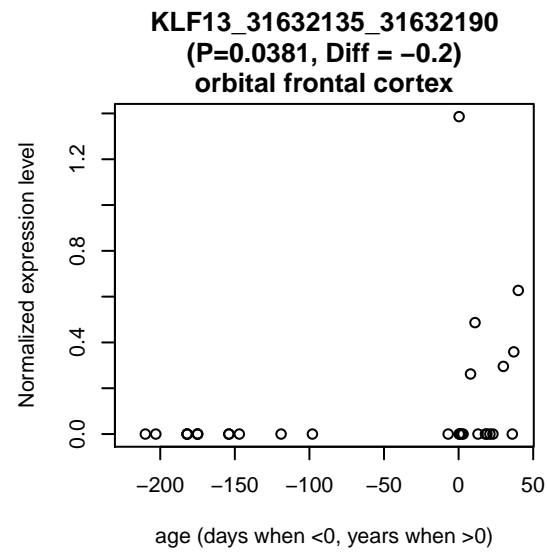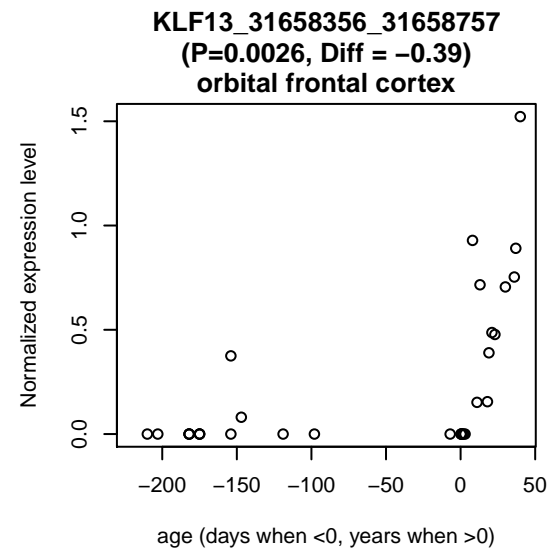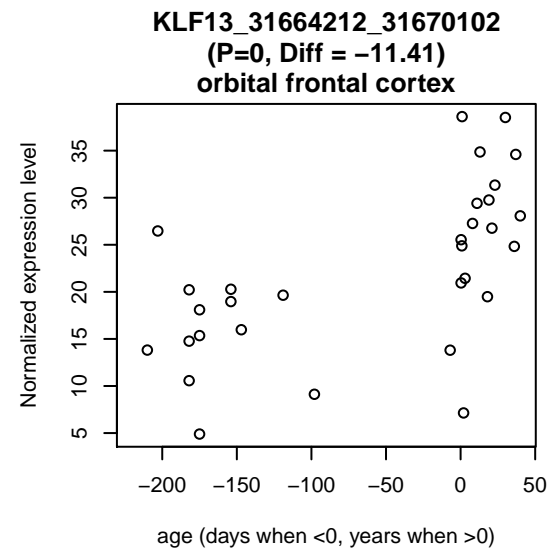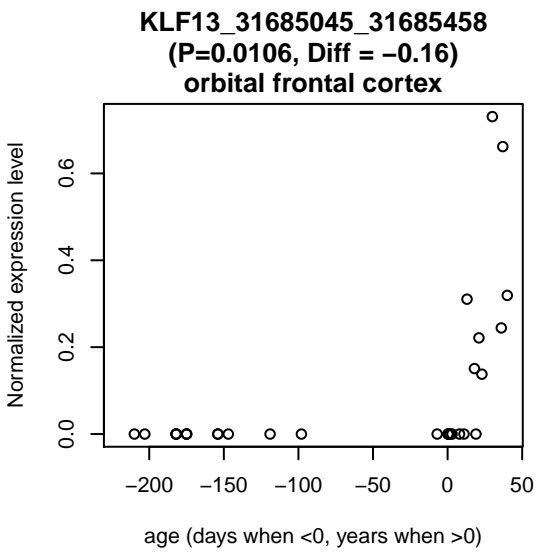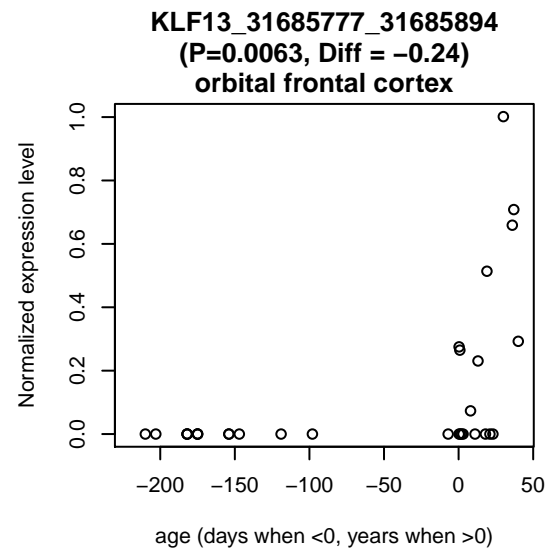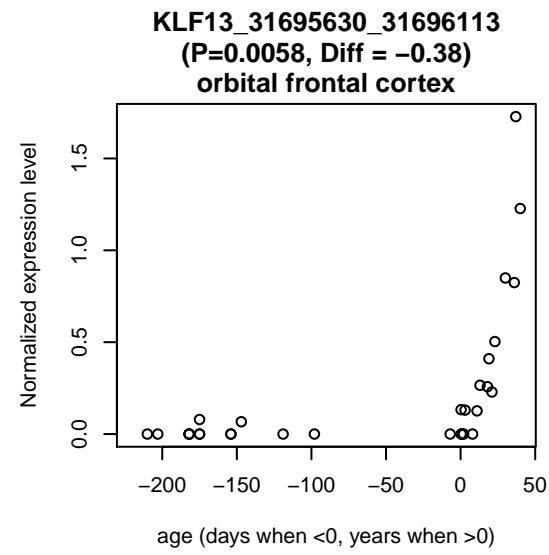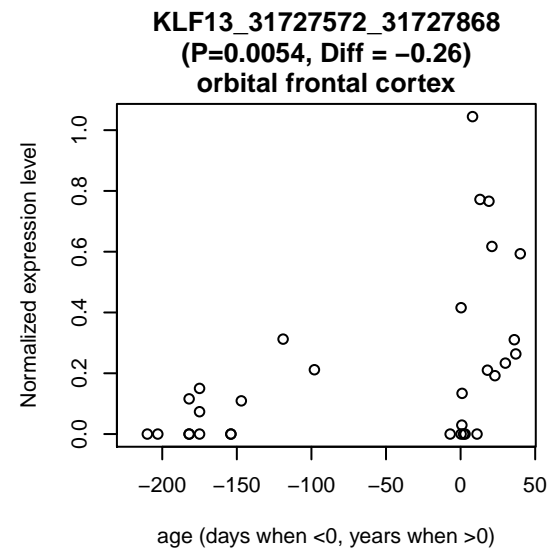

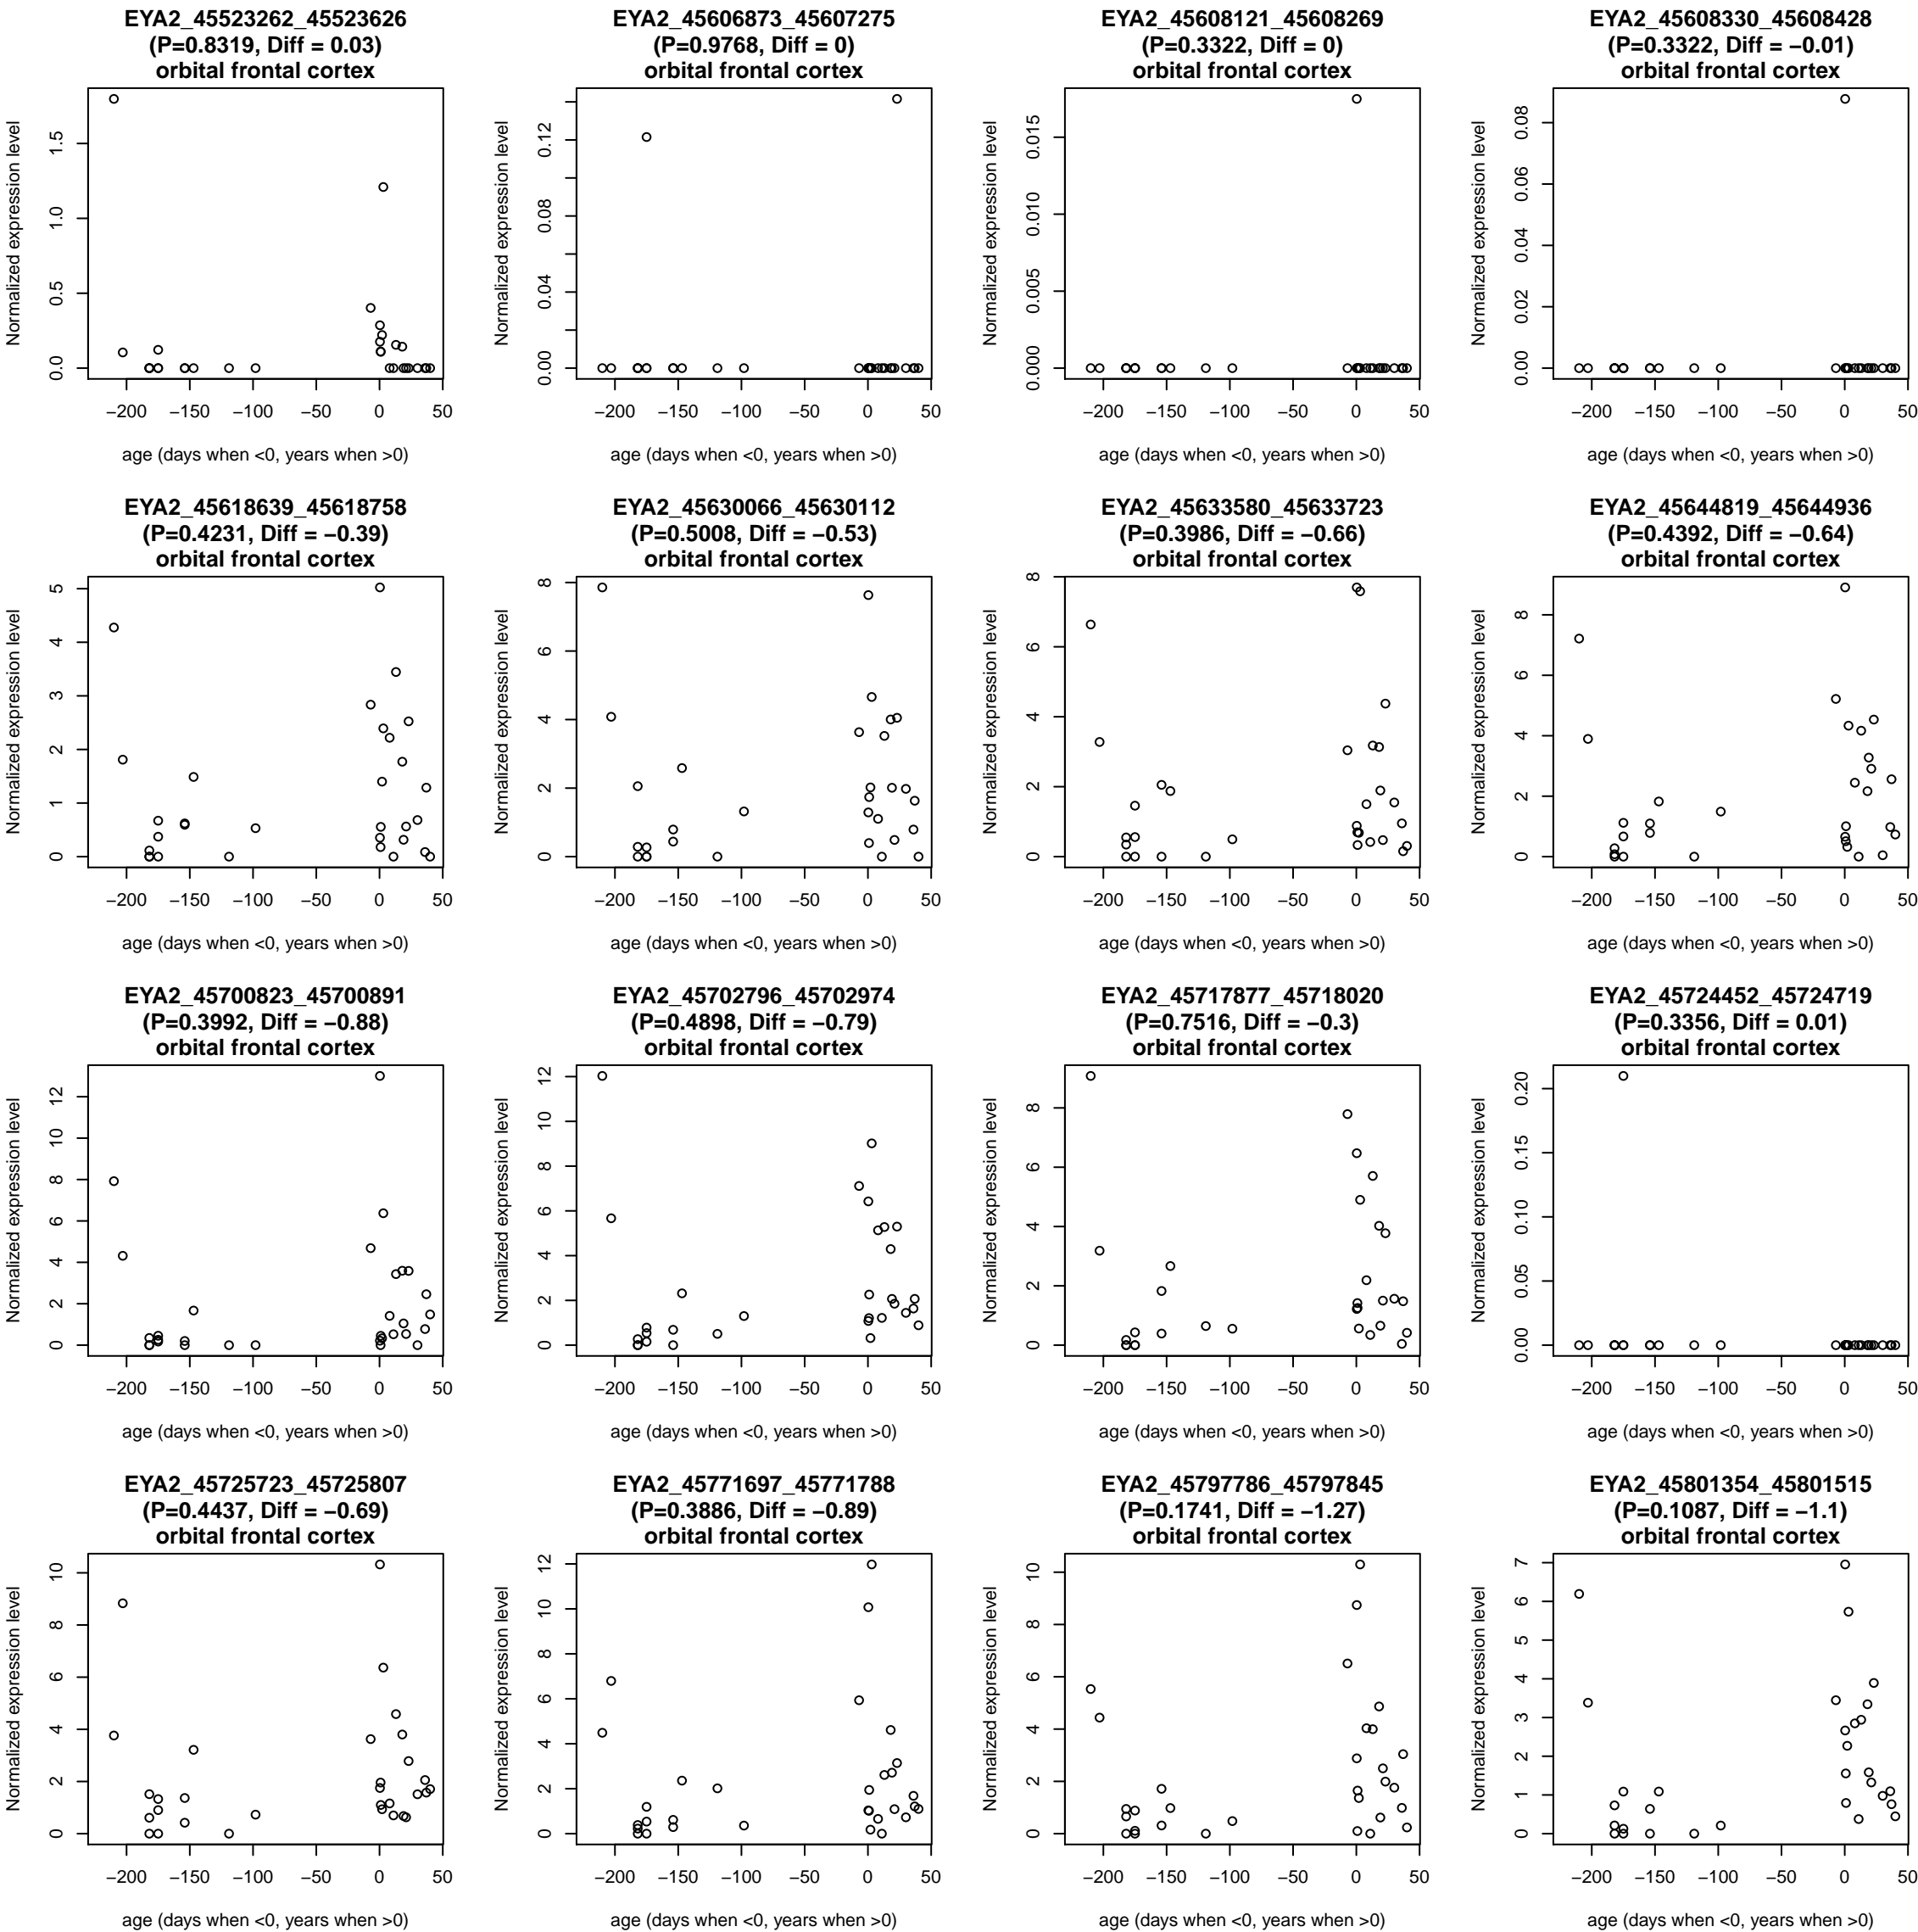



**EYA2\_45808445\_45808564**  
(P=0.4891, Diff = -0.71)  
orbital frontal cortex

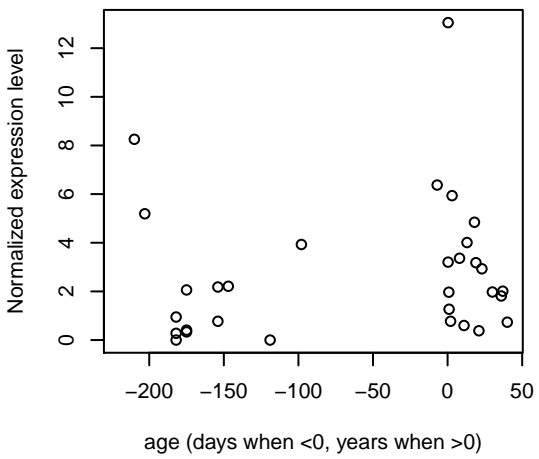

**EYA2\_45809462\_45809584**  
(P=0.1779, Diff = -1.7)  
orbital frontal cortex

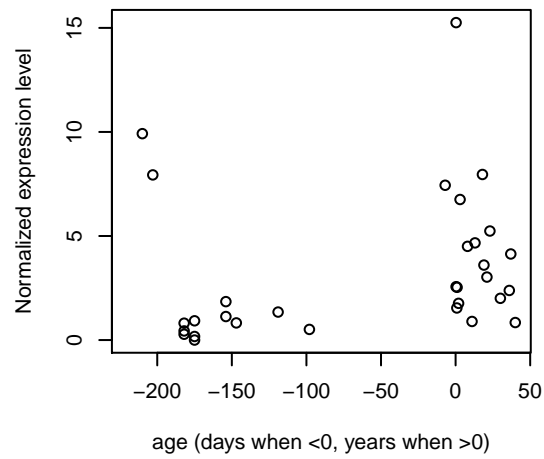

**EYA2\_45811938\_45812039**  
(P=0.2191, Diff = -2.2)  
orbital frontal cortex

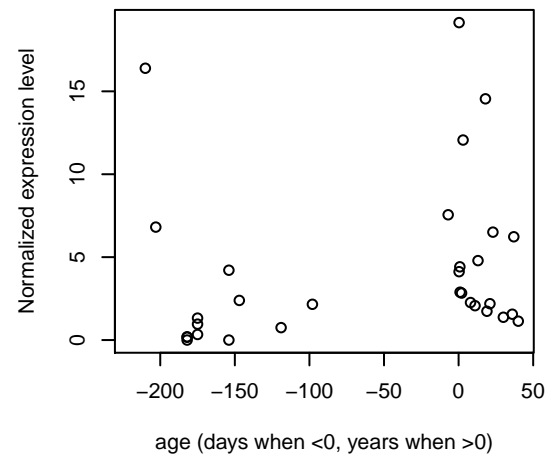

**EYA2\_45816700\_45817492**  
(P=0.1618, Diff = -2.05)  
orbital frontal cortex

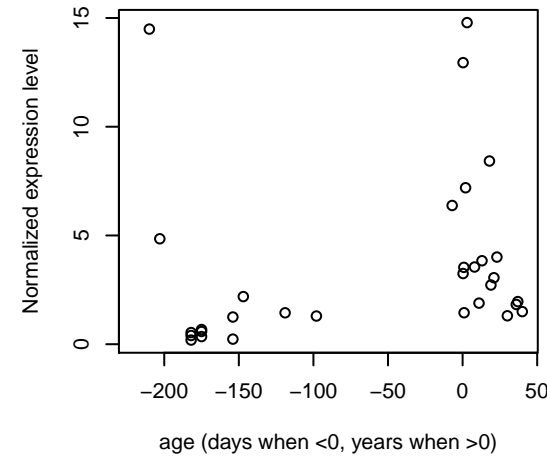

**LMCD1\_8543392\_8543666**  
(P=0.1443, Diff = -0.3)  
orbital frontal cortex

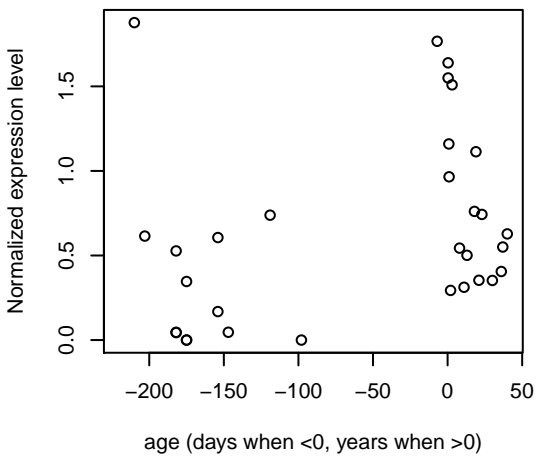

**LMCD1\_8556610\_8556681**  
(P=0.2161, Diff = -0.09)  
orbital frontal cortex

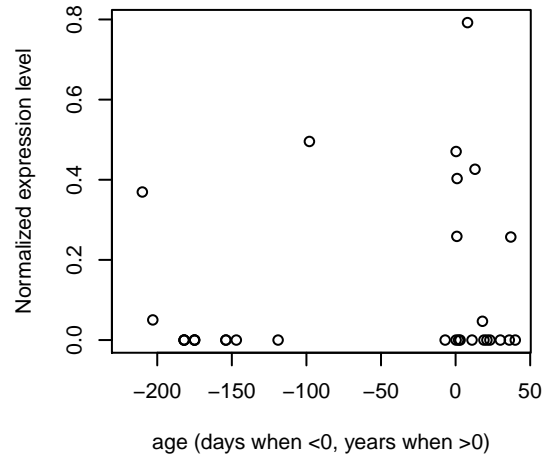

**LMCD1\_8574422\_8574511**  
(P=0.3253, Diff = -1.14)  
orbital frontal cortex

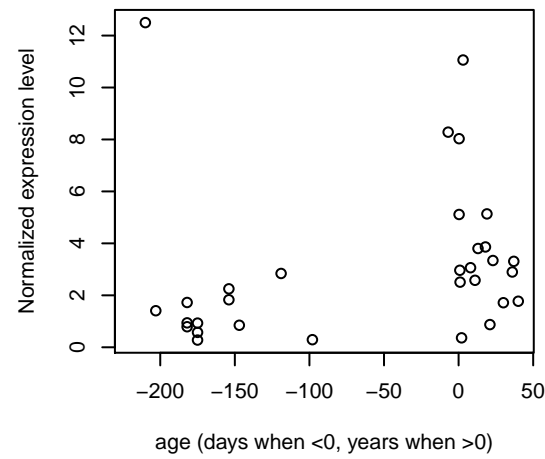

**LMCD1\_8578868\_8579204**  
(P=0.4307, Diff = -0.58)  
orbital frontal cortex

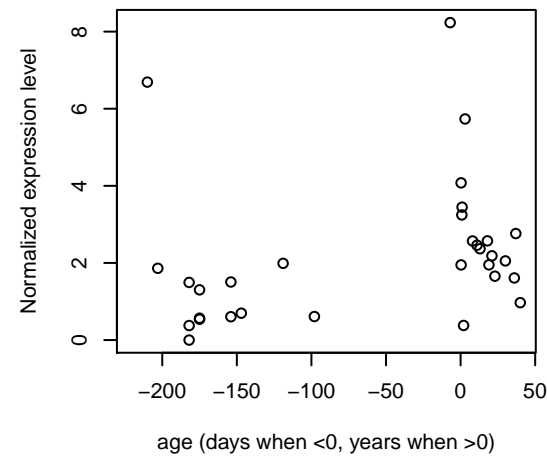

**LMCD1\_8590253\_8590589**  
(P=0.495, Diff = -0.54)  
orbital frontal cortex

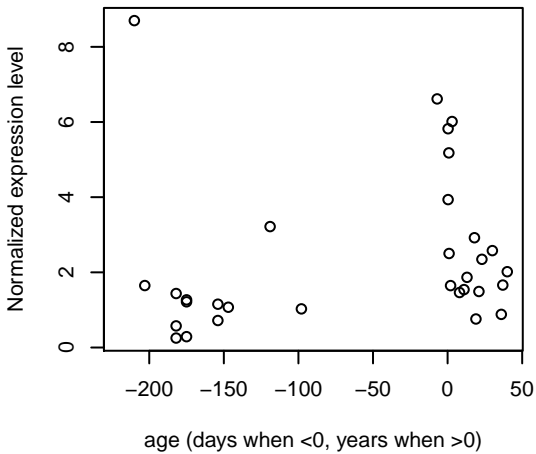

**LMCD1\_8591559\_8592135**  
(P=0.091, Diff = -0.04)  
orbital frontal cortex

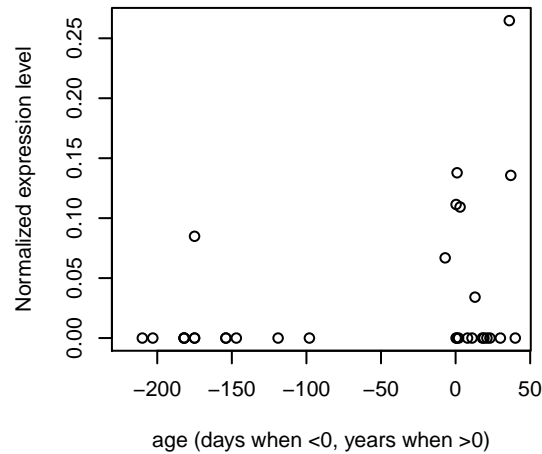

**LMCD1\_8607117\_8607333**  
(P=0.4445, Diff = -0.54)  
orbital frontal cortex

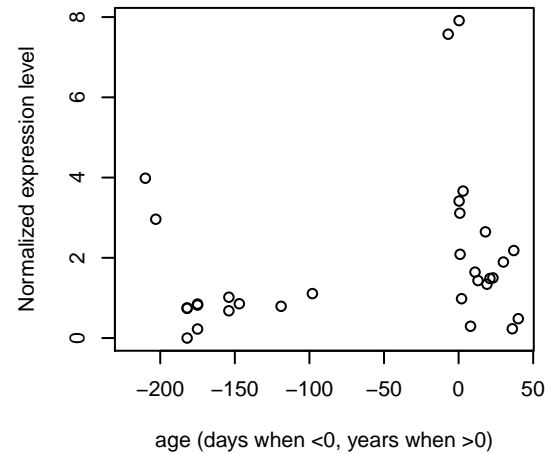

**LMCD1\_8609125\_8609805**  
(P=0.2405, Diff = -1.04)  
orbital frontal cortex

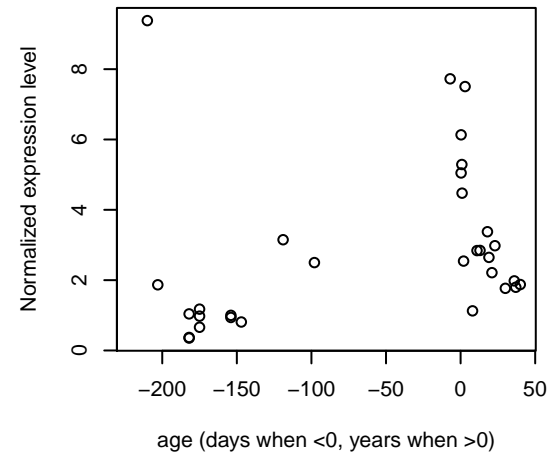

**WVOX\_78133550\_78133782**  
(P=0.654, Diff = -0.34)  
orbital frontal cortex

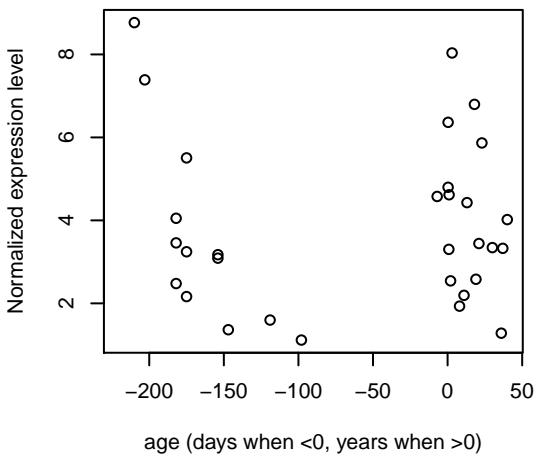

**WVOX\_78142319\_78142384**  
(P=0.0764, Diff = -1.55)  
orbital frontal cortex

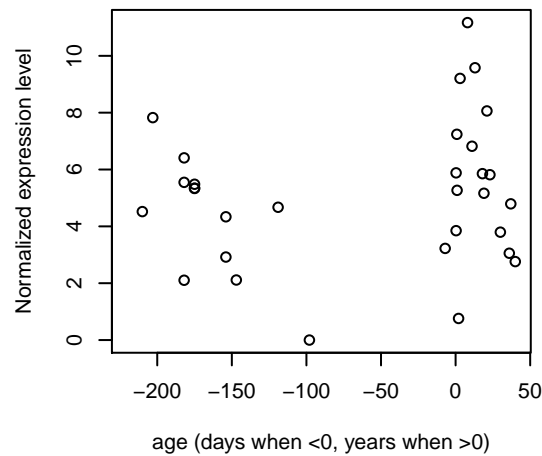

**WVOX\_78143674\_78143732**  
(P=0.3537, Diff = -1.1)  
orbital frontal cortex

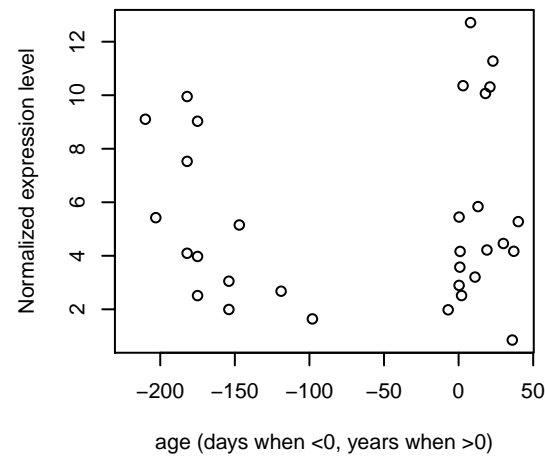

**WVOX\_78148872\_78149051**  
(P=0.0813, Diff = -1.45)  
orbital frontal cortex

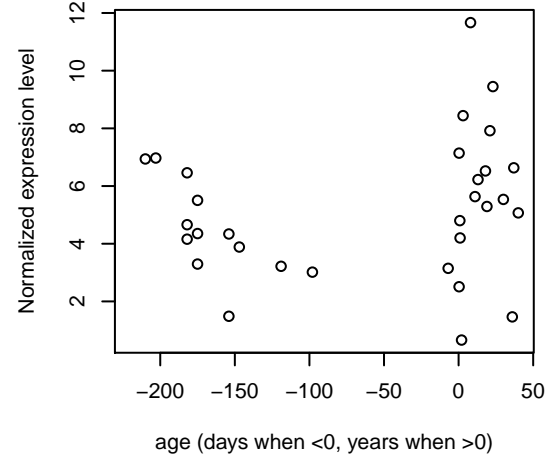

**WVOX\_78198079\_78198186**  
(P=0.0459, Diff = -1.95)  
orbital frontal cortex

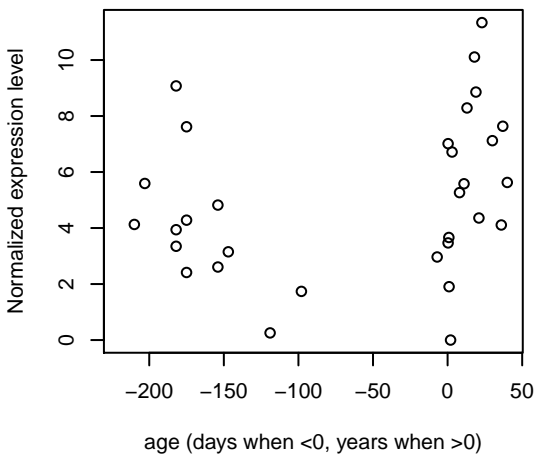

**WVOX\_78312499\_78312593**  
(P=NaN, Diff = 0)  
orbital frontal cortex

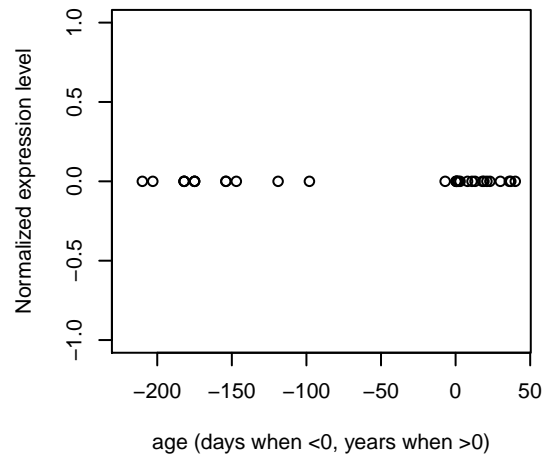

**WVOX\_78420756\_78420845**  
(P=0.0337, Diff = -2.84)  
orbital frontal cortex

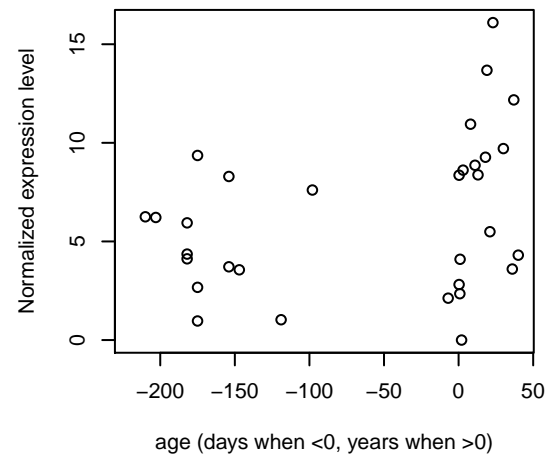

**WVOX\_78458766\_78458952**  
(P=0.0099, Diff = -2.95)  
orbital frontal cortex

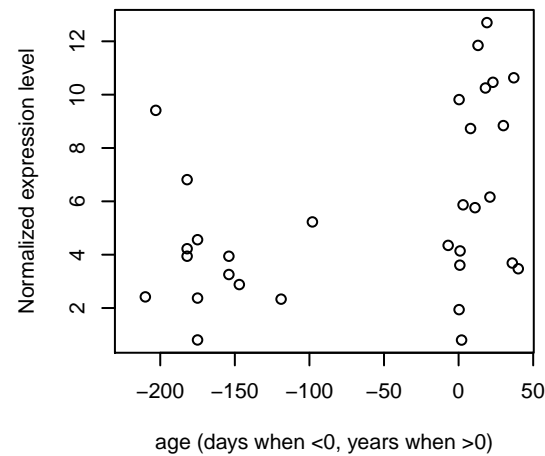

**WVOX\_78466384\_78466649**  
(P=0.0028, Diff = -2.33)  
orbital frontal cortex

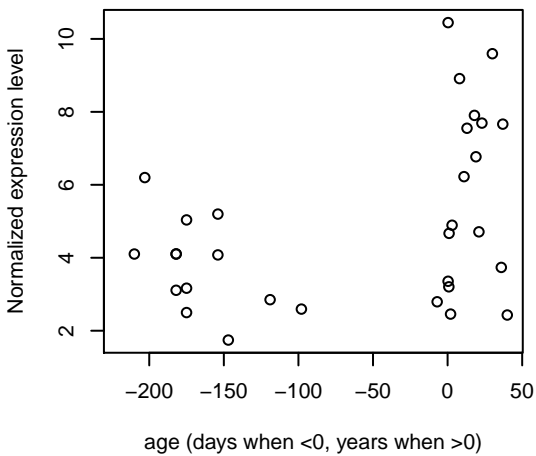

**WVOX\_78790836\_78790912**  
(P=0.0254, Diff = -0.13)  
orbital frontal cortex

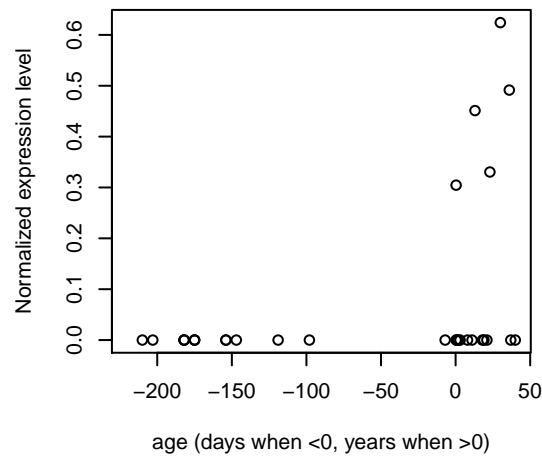

**WVOX\_79245504\_79246031**  
(P=1e-04, Diff = -2.77)  
orbital frontal cortex

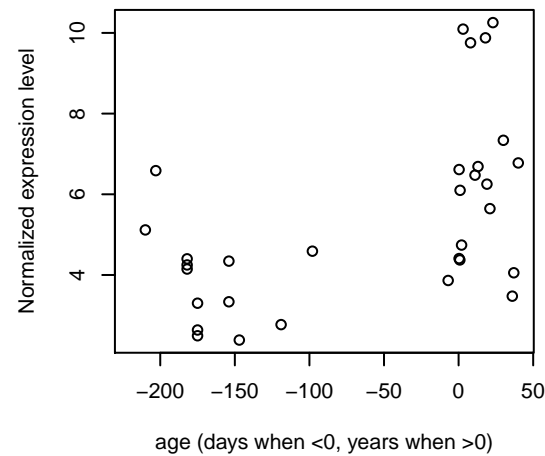

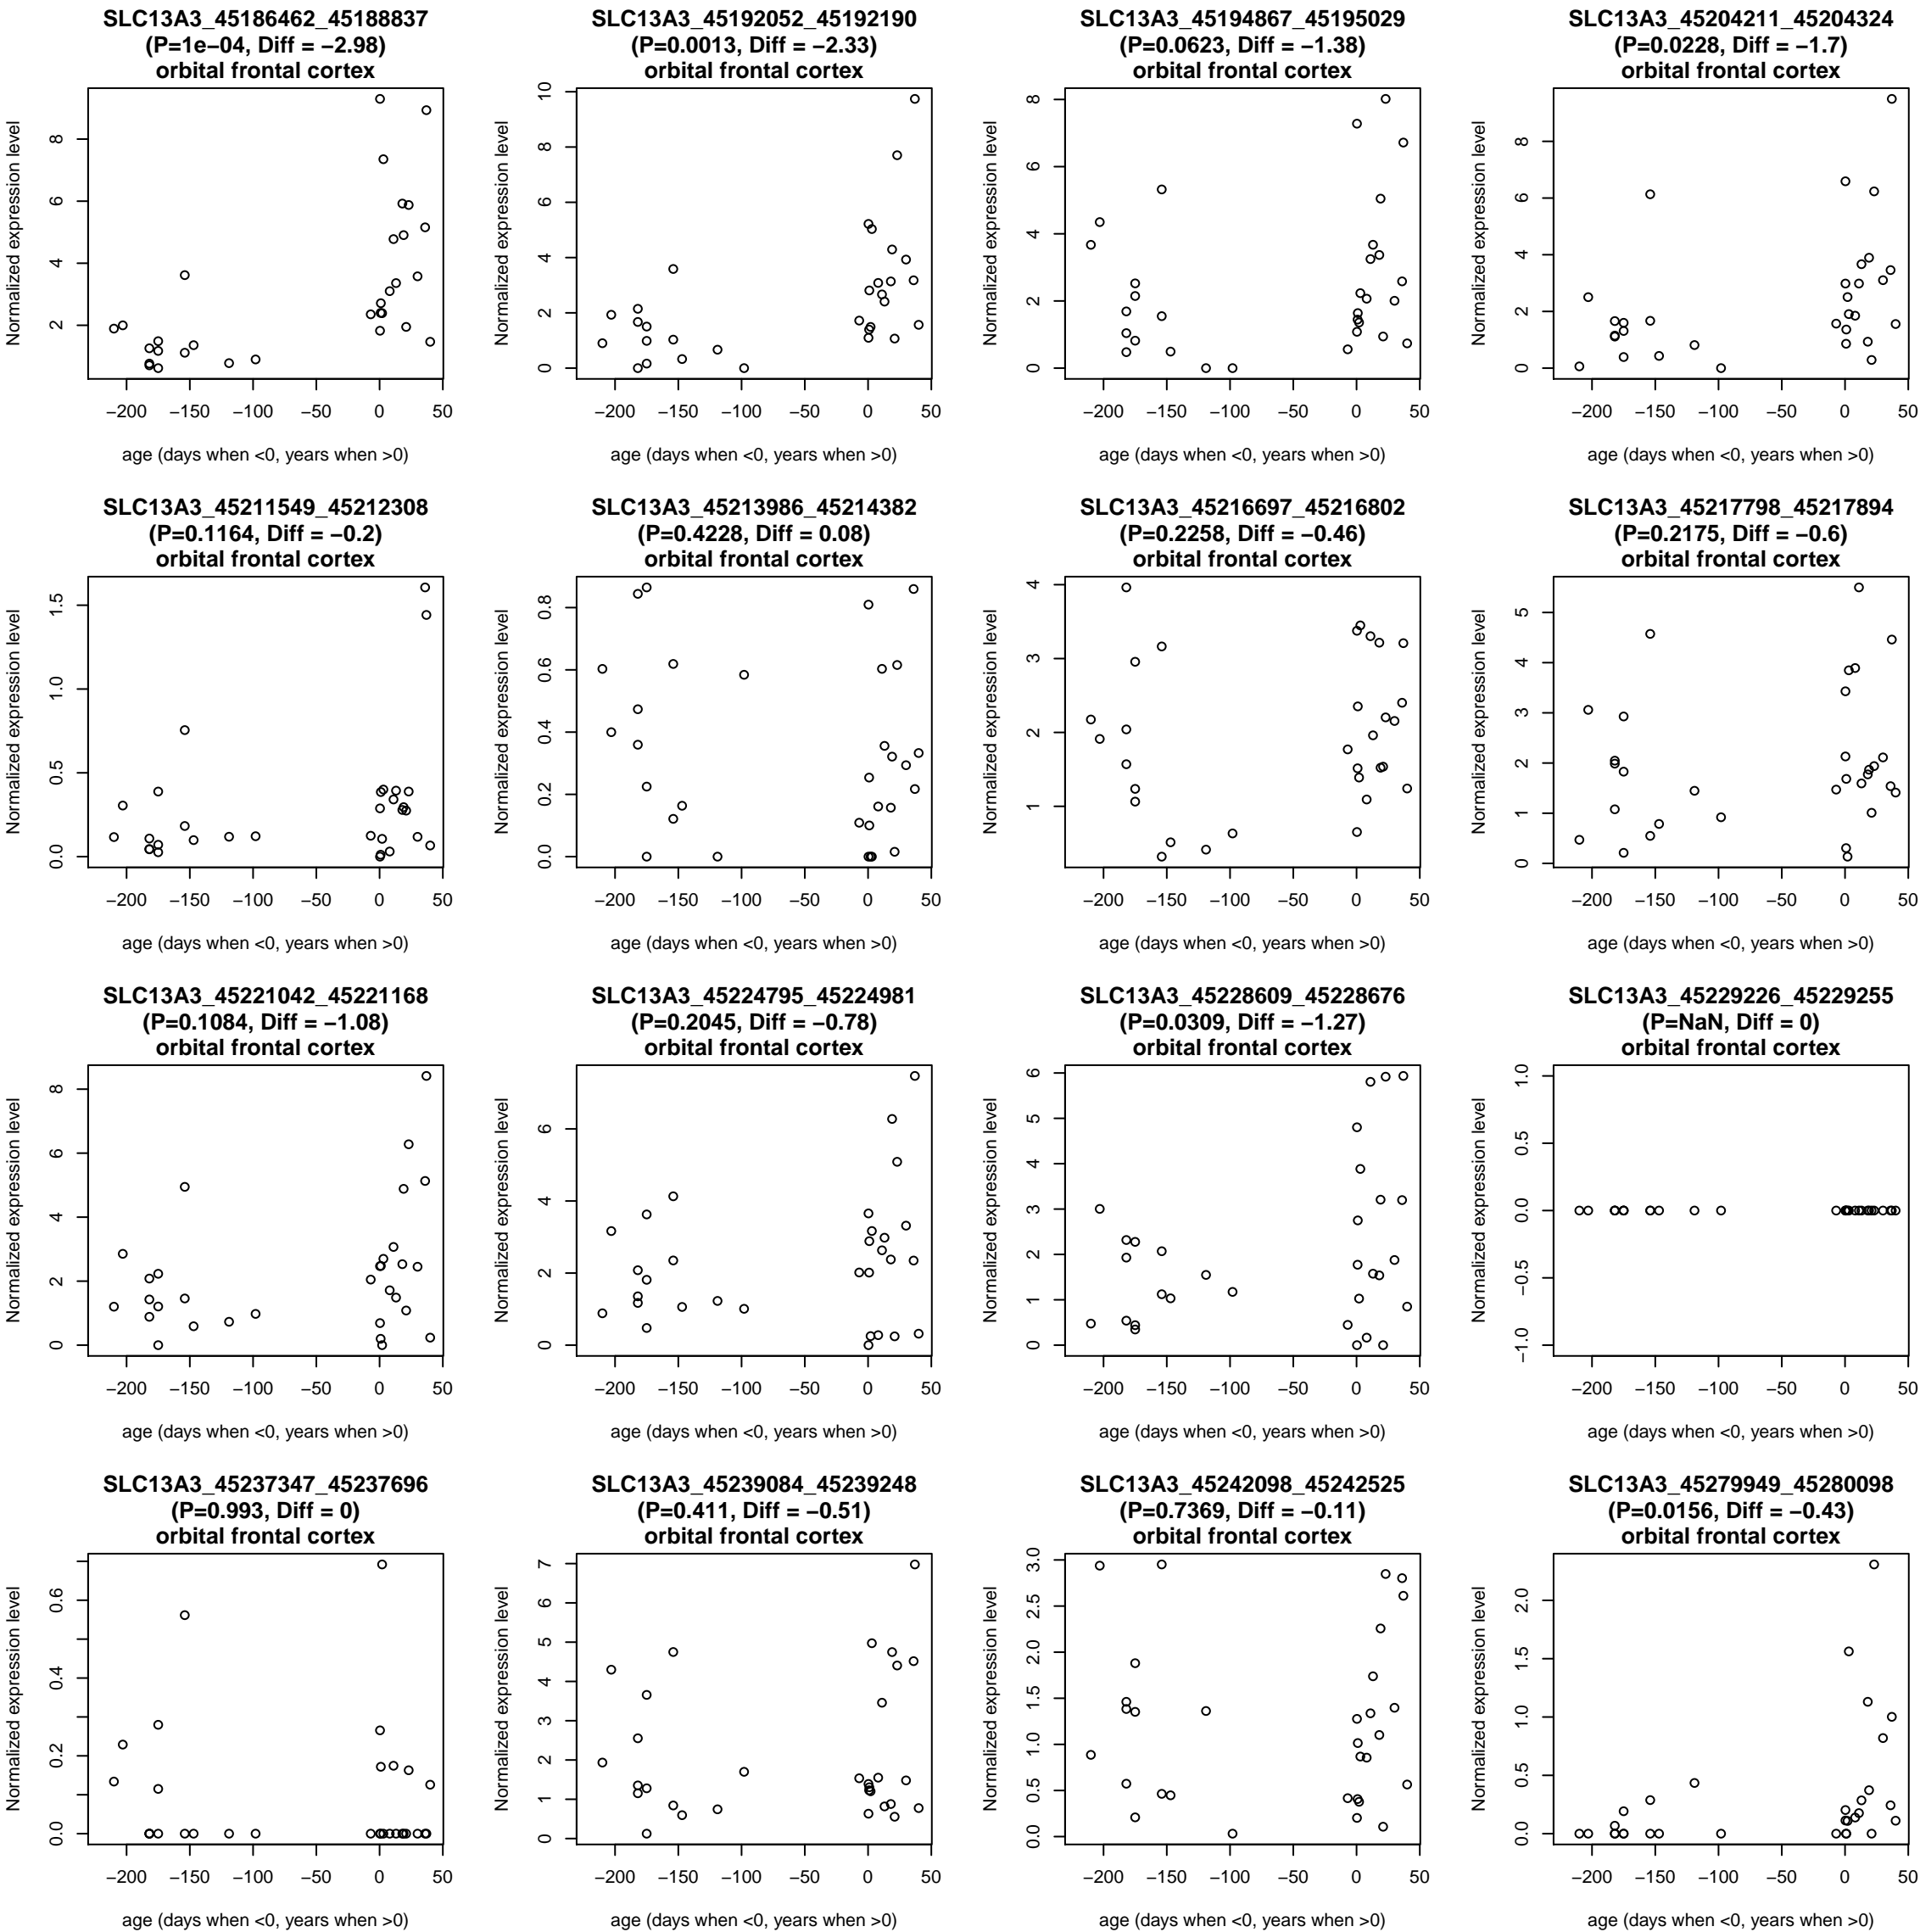

**SLC13A3\_45298681\_45298778**  
(P=0.0247, Diff = 0.84)  
orbital frontal cortex

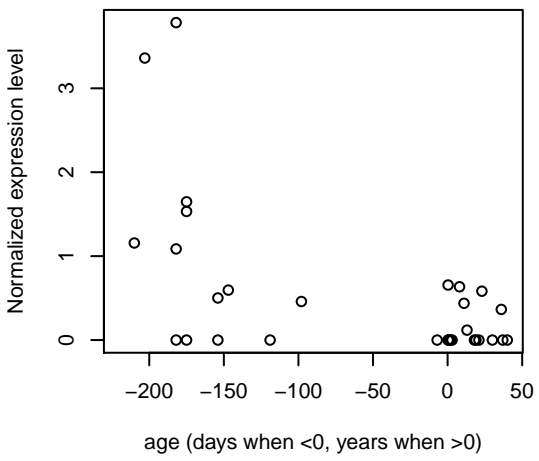

**SLC13A3\_45302302\_45302417**  
(P=0.2652, Diff = -0.09)  
orbital frontal cortex

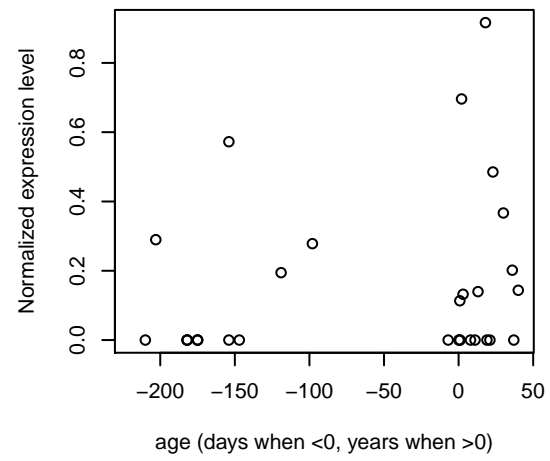

**SLC13A3\_45304585\_45304714**  
(P=0.3573, Diff = -0.15)  
orbital frontal cortex

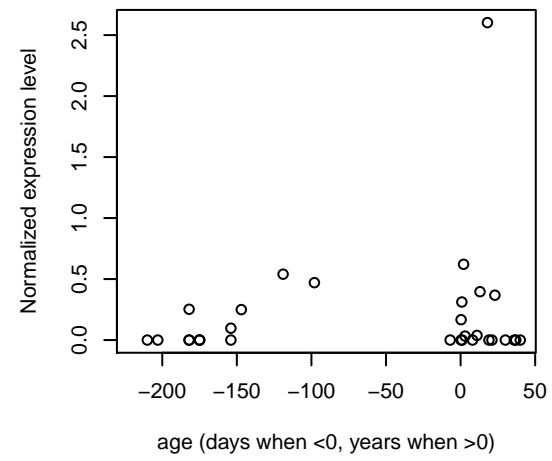

**HTR1B\_78171947\_78173490**  
**(P=0.0144, Diff = -0.45)**  
**orbital frontal cortex**

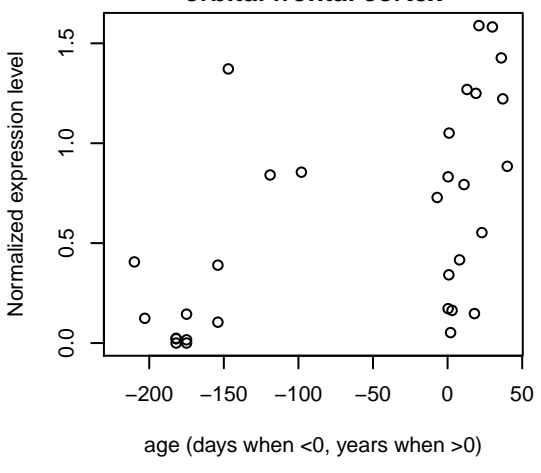

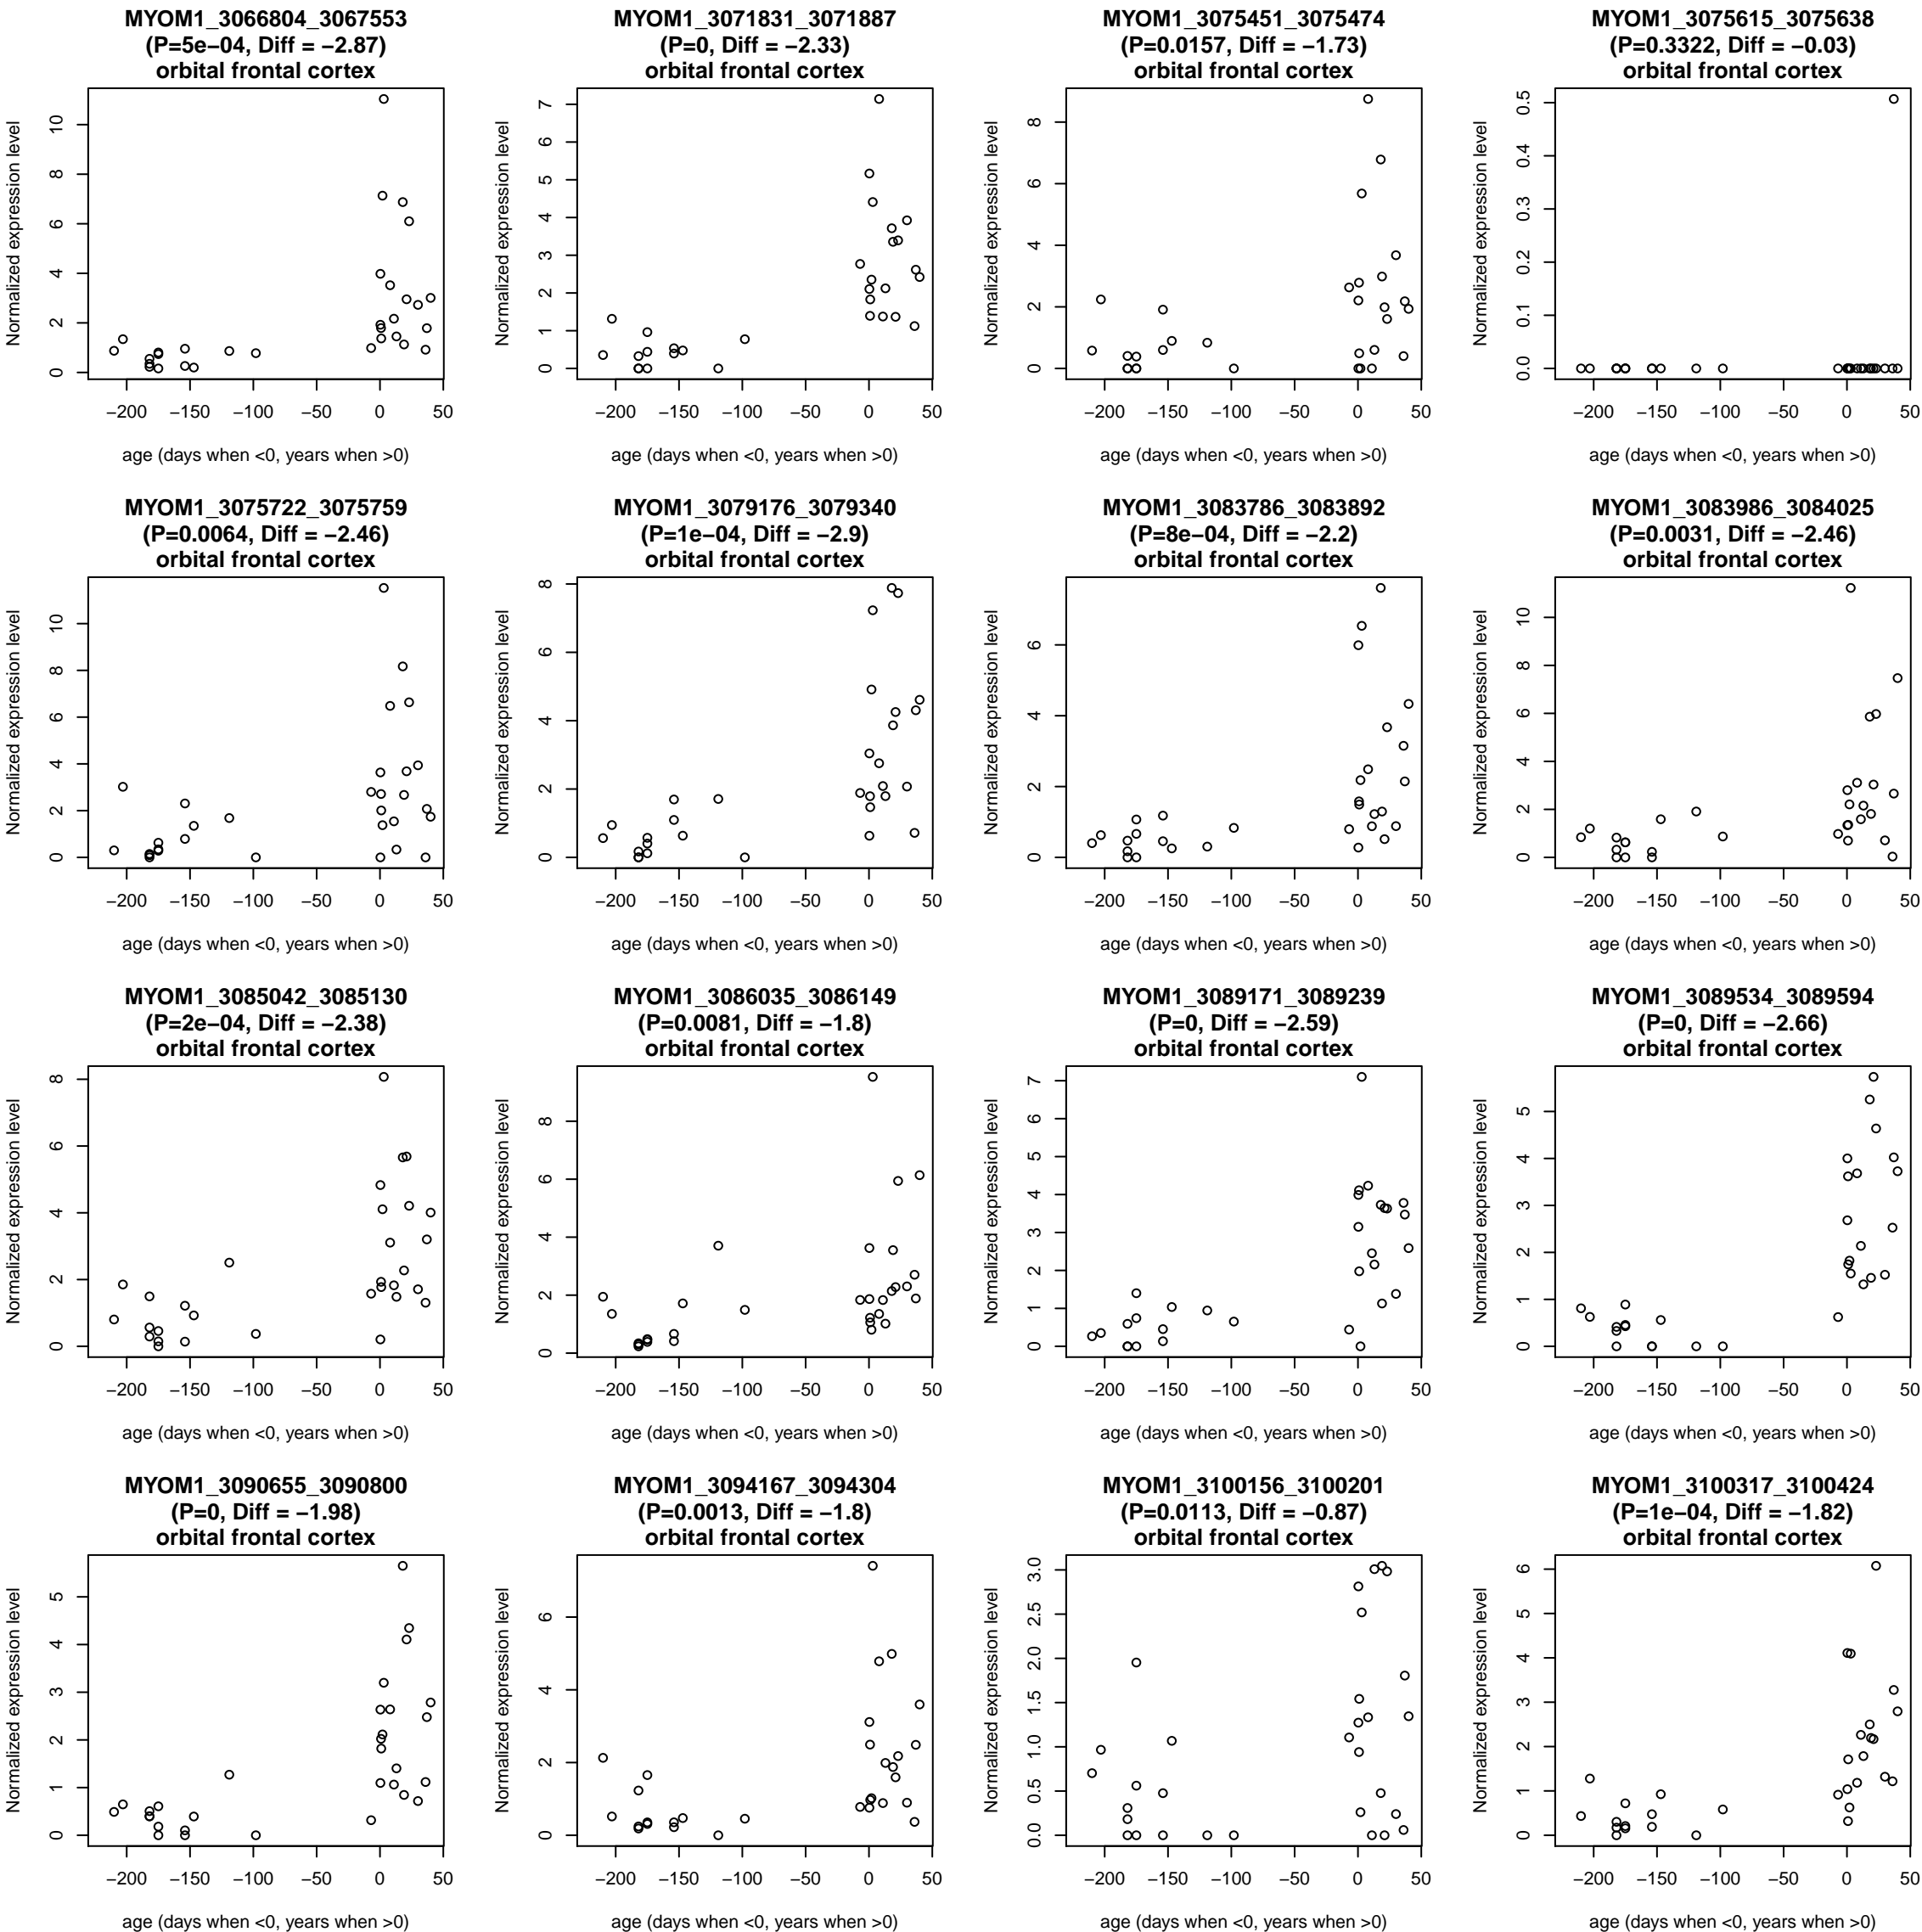

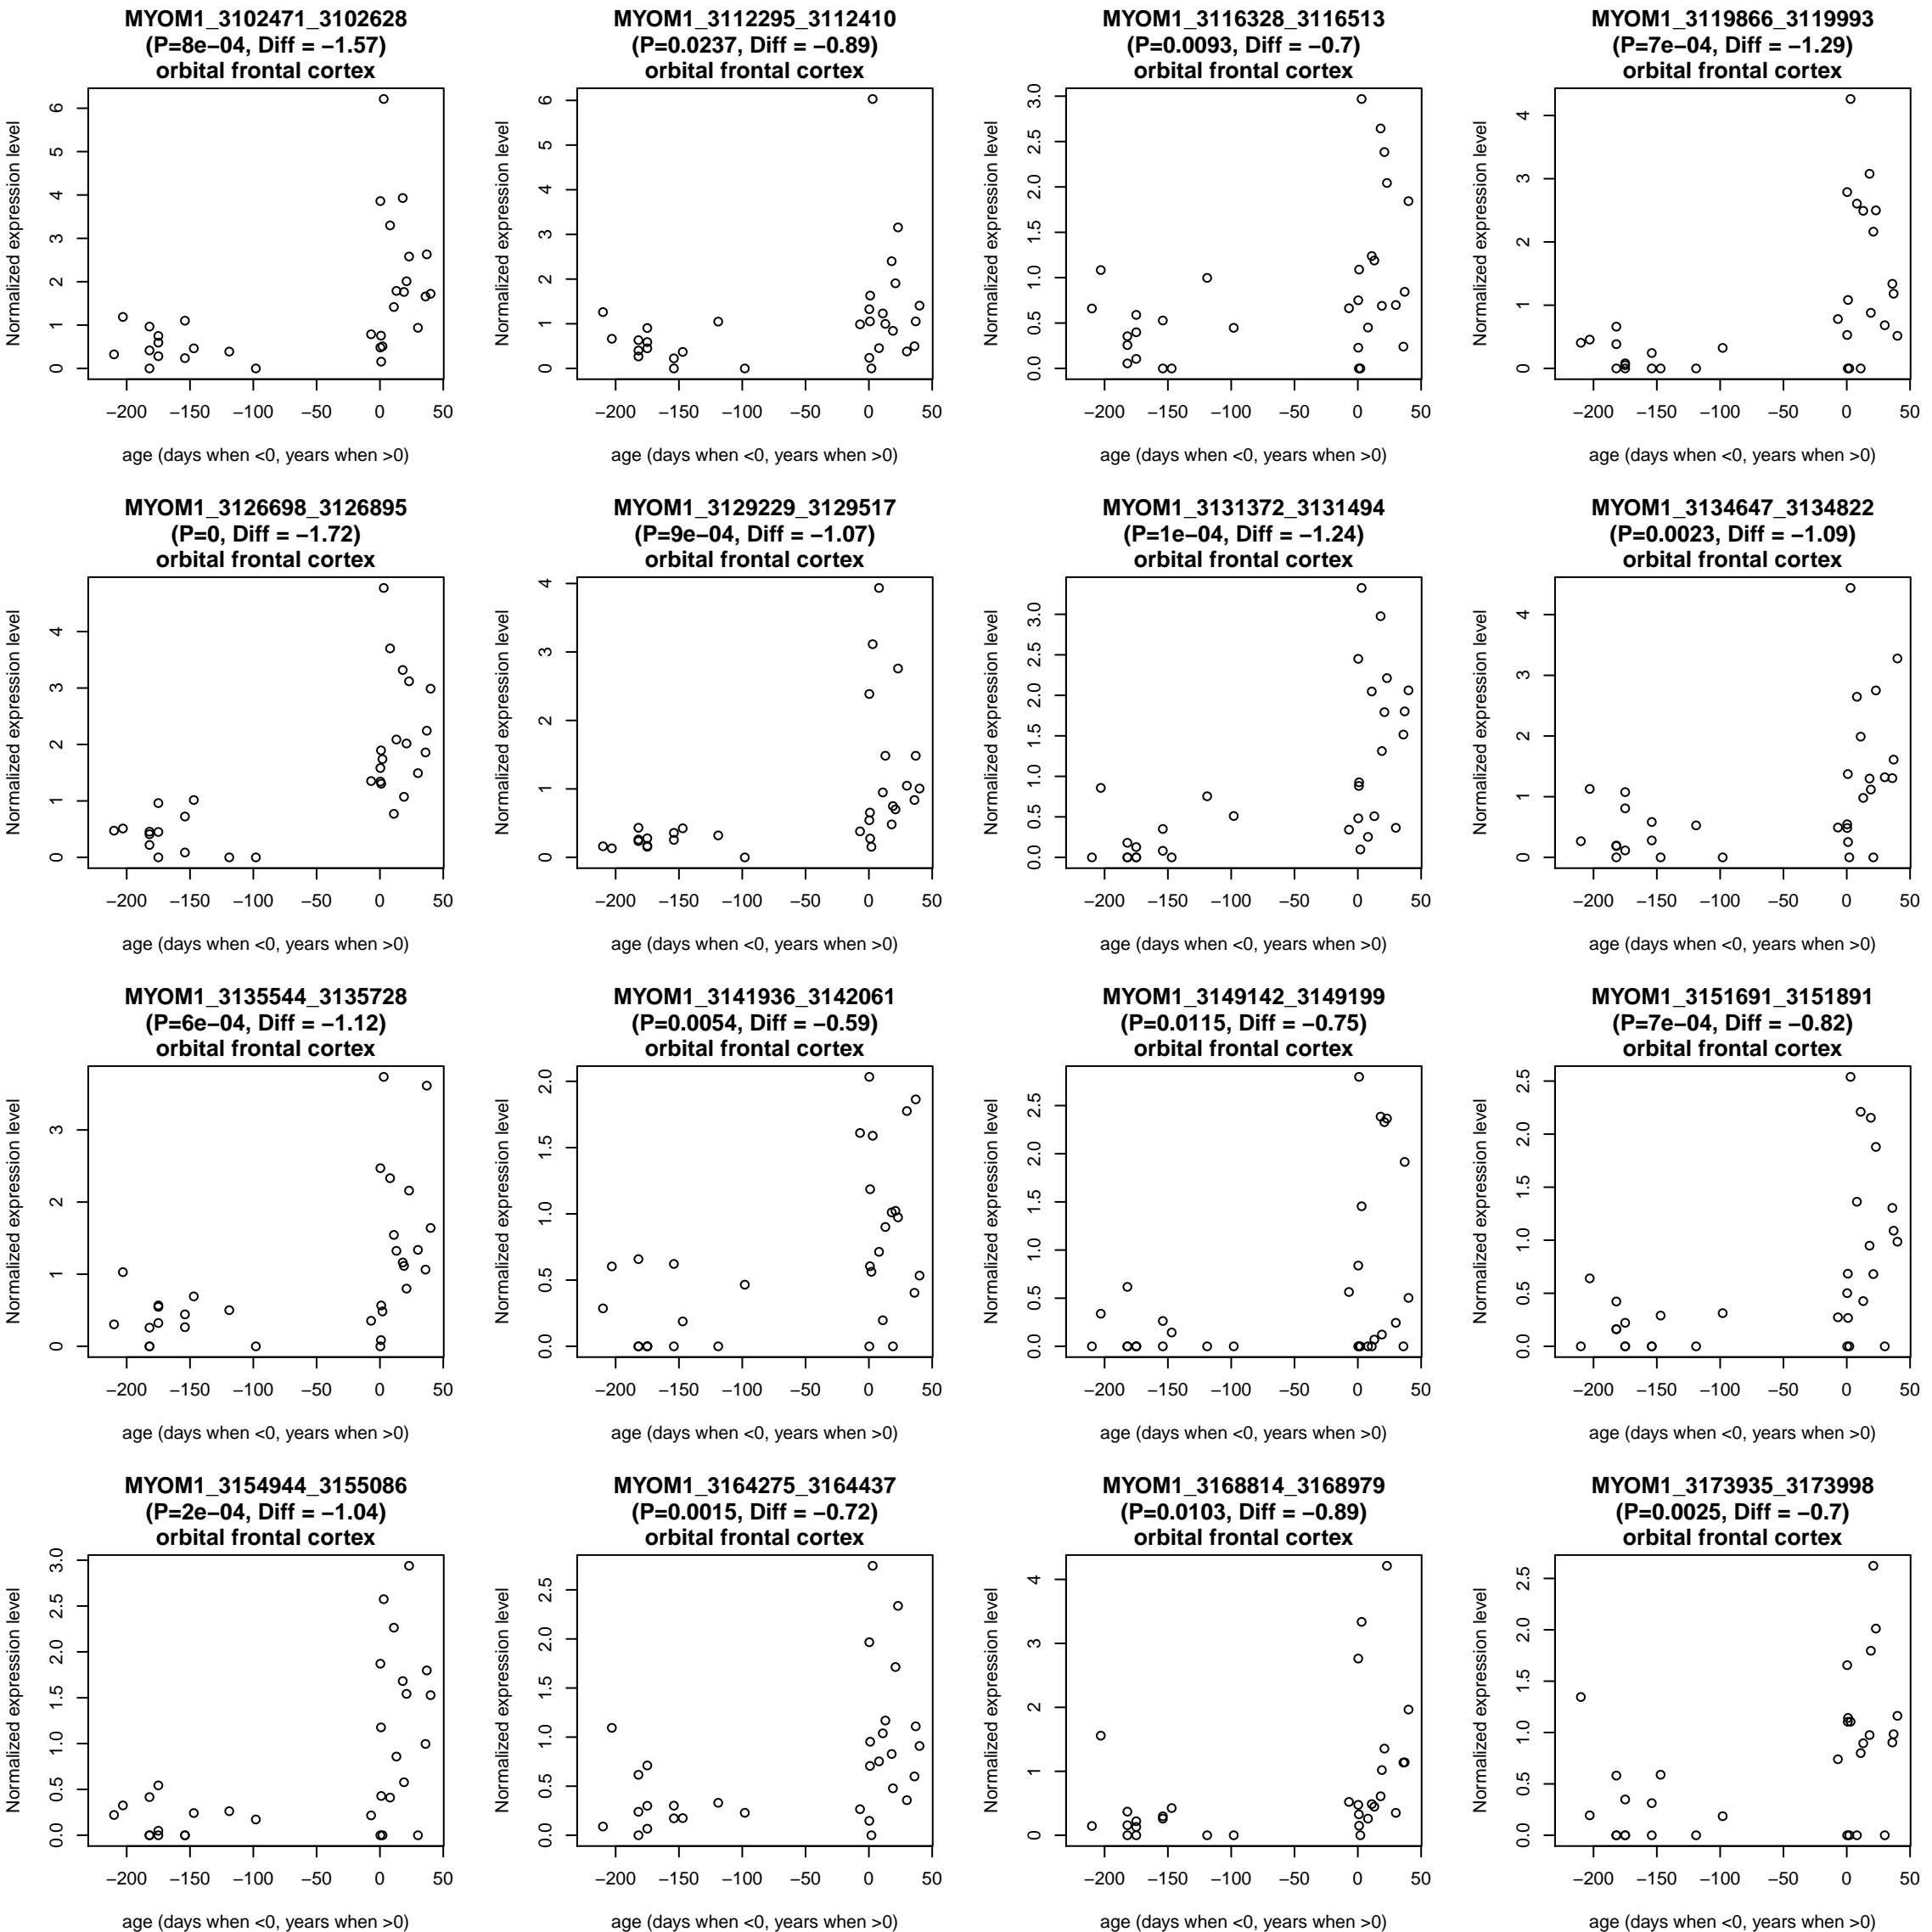



**MYOM1\_3174117\_3174206**  
(P=0.0031, Diff = -1.04)  
orbital frontal cortex

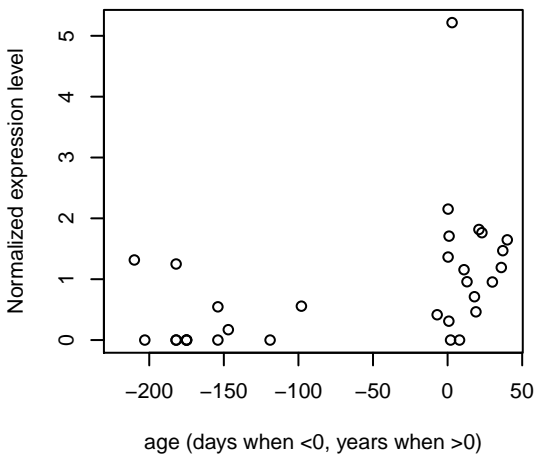

**MYOM1\_3176039\_3176132**  
(P=0.0021, Diff = -0.71)  
orbital frontal cortex

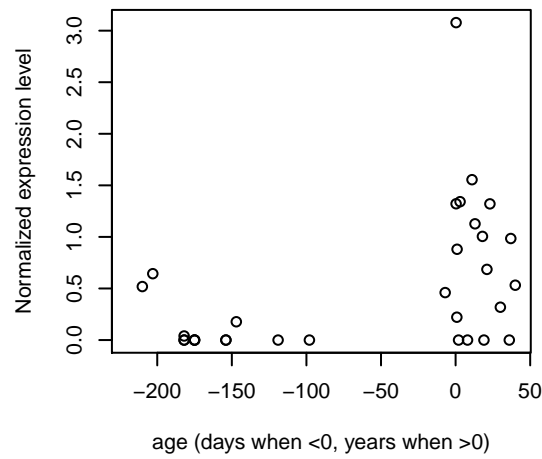

**MYOM1\_3187477\_3187635**  
(P=5e-04, Diff = -0.77)  
orbital frontal cortex

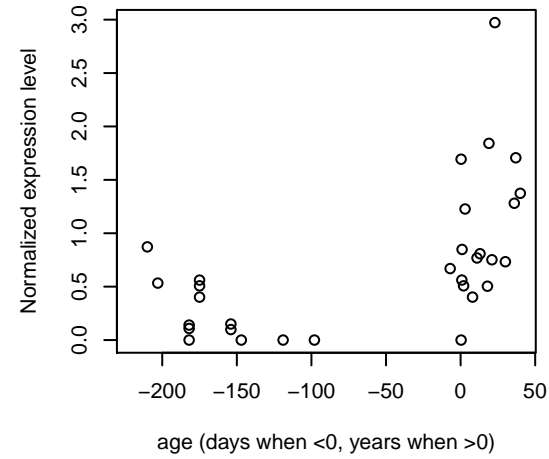

**MYOM1\_3188745\_3189085**  
(P=0.0019, Diff = -0.71)  
orbital frontal cortex

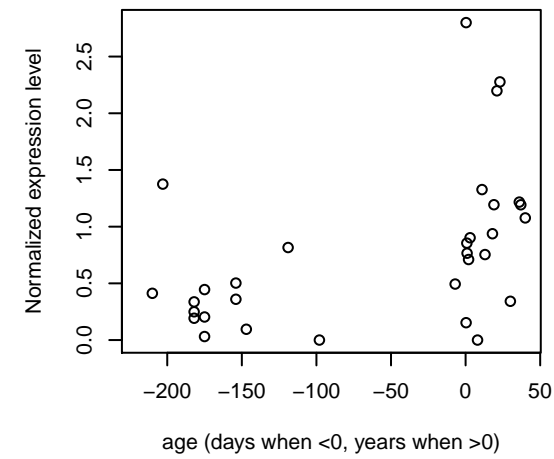

**MYOM1\_3193815\_3193956**  
(P=4e-04, Diff = -0.58)  
orbital frontal cortex

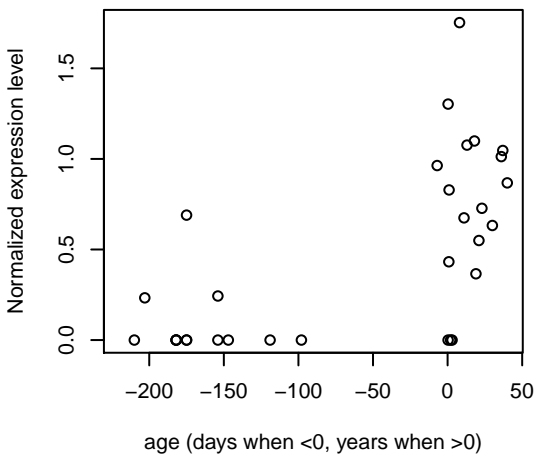

**MYOM1\_3214931\_3215249**  
(P=8e-04, Diff = -0.53)  
orbital frontal cortex

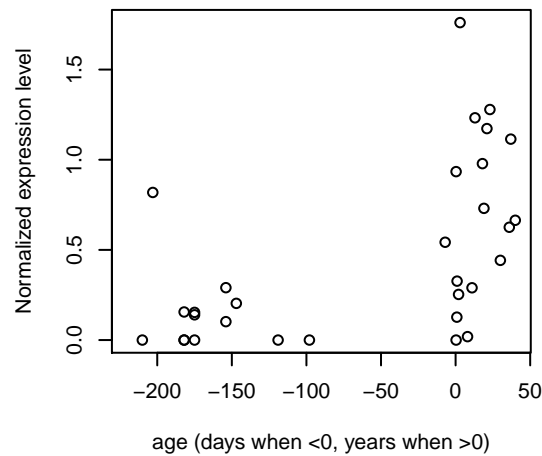

**MYOM1\_3219800\_3220106**  
(P=0.1862, Diff = -0.06)  
orbital frontal cortex

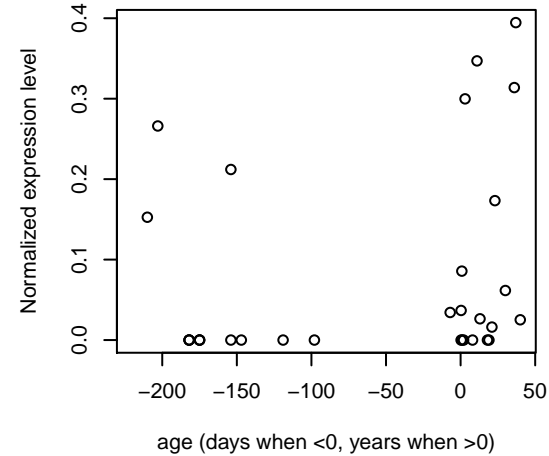

**USP44\_95910335\_95912129**  
(P=0.0249, Diff = 0.32)  
orbital frontal cortex

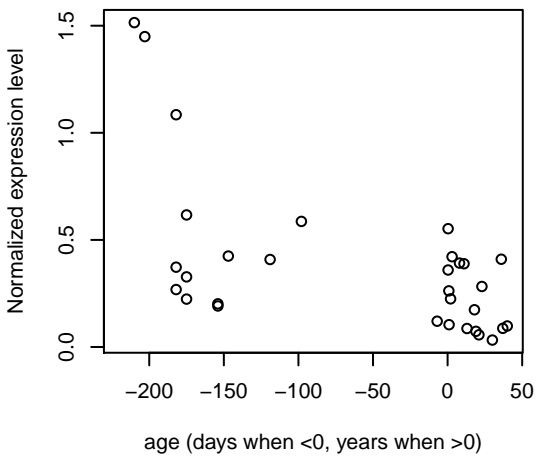

**USP44\_95914772\_95914978**  
(P=0.1106, Diff = 0.39)  
orbital frontal cortex

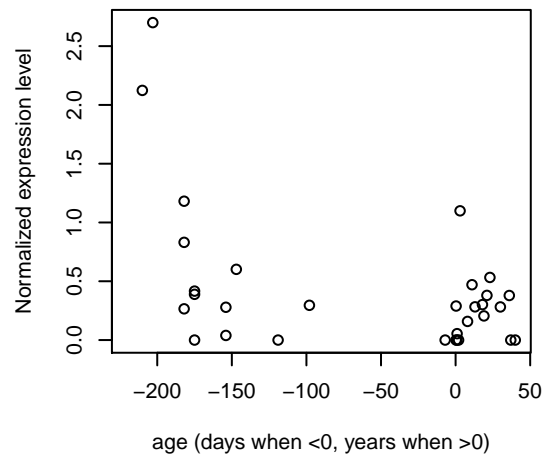

**USP44\_95918295\_95918564**  
(P=0.0346, Diff = 0.26)  
orbital frontal cortex

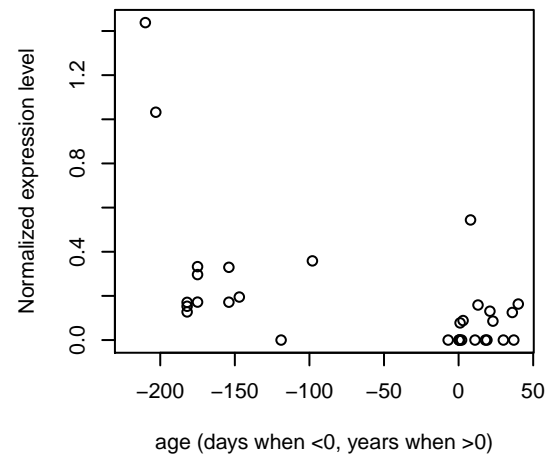

**USP44\_95922582\_95922778**  
(P=0.119, Diff = 0.3)  
orbital frontal cortex

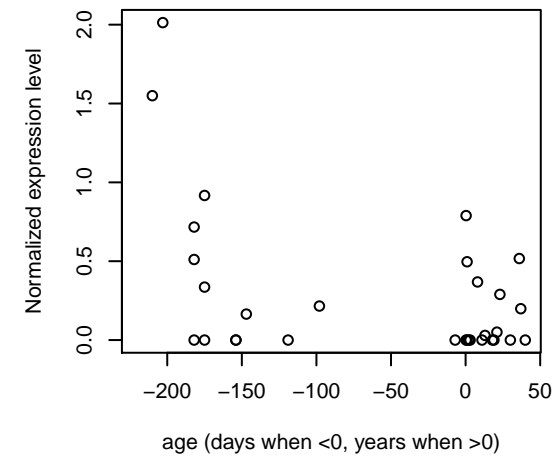

**USP44\_95926604\_95928102**  
(P=0.0413, Diff = 0.46)  
orbital frontal cortex

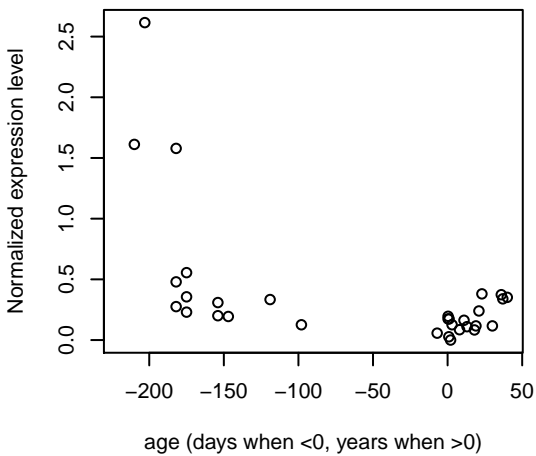

**USP44\_95929148\_95929202**  
(P=0.8718, Diff = -0.02)  
orbital frontal cortex

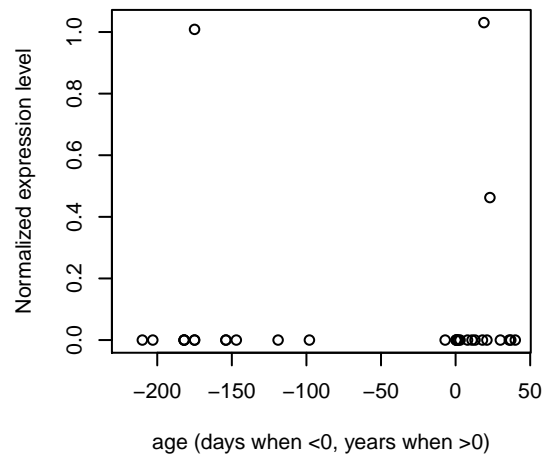

**USP44\_95940225\_95940766**  
(P=0.0539, Diff = -0.09)  
orbital frontal cortex

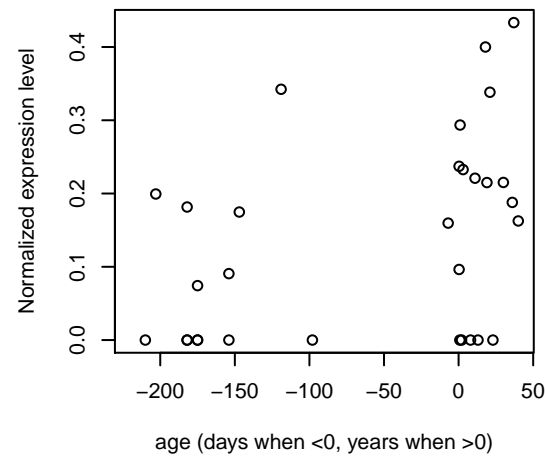

**USP44\_95941758\_95942048**  
(P=0.1213, Diff = 0.05)  
orbital frontal cortex

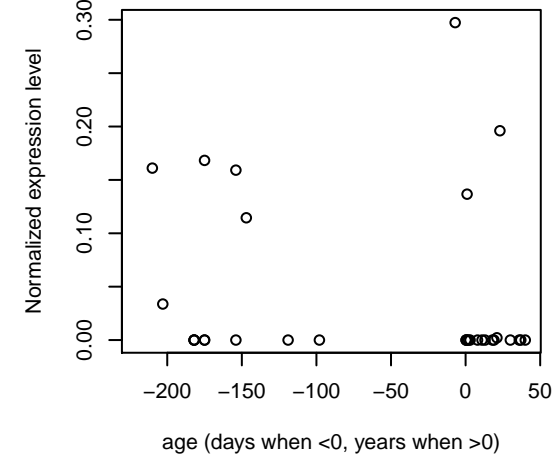

**USP44\_95942301\_95942620**  
(P=0.5158, Diff = -0.04)  
orbital frontal cortex

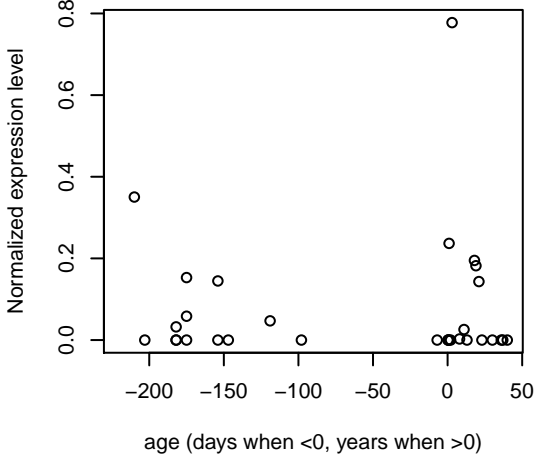

**USP44\_95945047\_95945266**  
(P=0.3356, Diff = 0.02)  
orbital frontal cortex

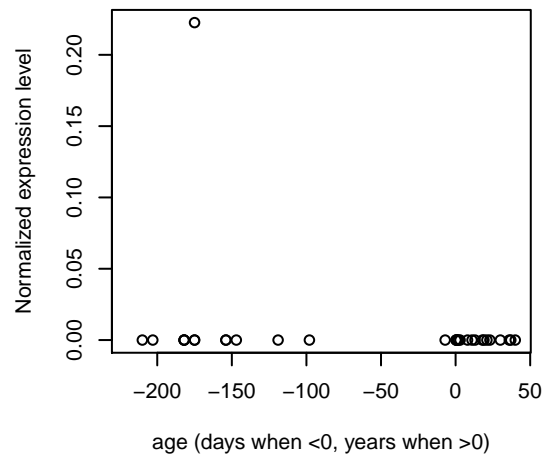

**IGFBP7\_57896938\_57897502**  
(P=0.2455, Diff = -10.9)  
orbital frontal cortex

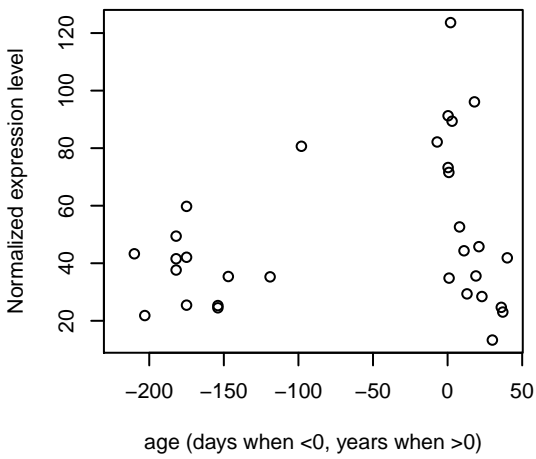

**IGFBP7\_57898203\_57898718**  
(P=0.0315, Diff = -20.63)  
orbital frontal cortex

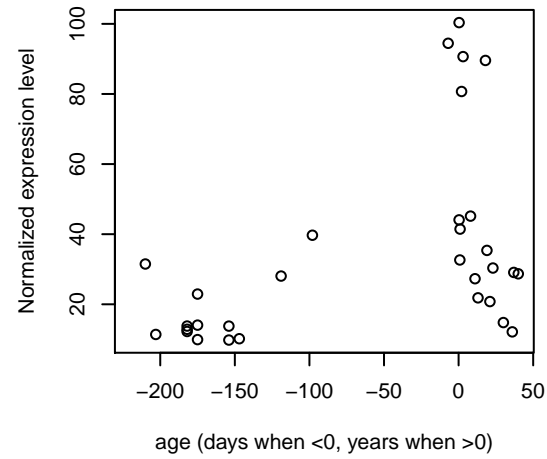

**IGFBP7\_57899360\_57899477**  
(P=0.0625, Diff = -74.87)  
orbital frontal cortex

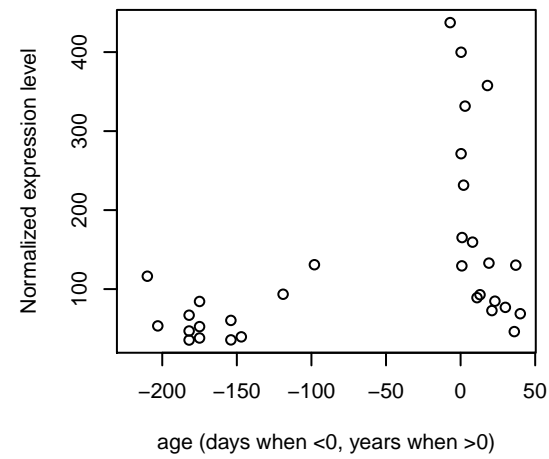

**IGFBP7\_57906989\_57907099**  
(P=0.0582, Diff = -76.01)  
orbital frontal cortex

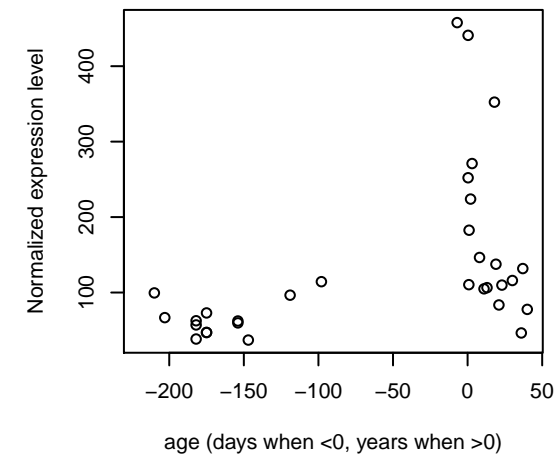

**IGFBP7\_57976042\_57976551**  
(P=0.0615, Diff = -22.41)  
orbital frontal cortex

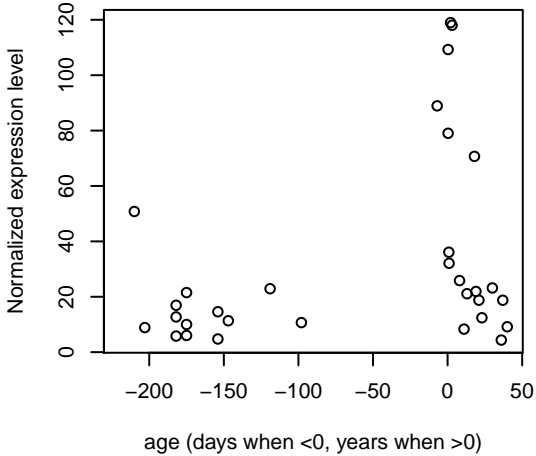

**OPA1\_193310932\_193311198**  
(P=0.017, Diff = 2.26)  
orbital frontal cortex

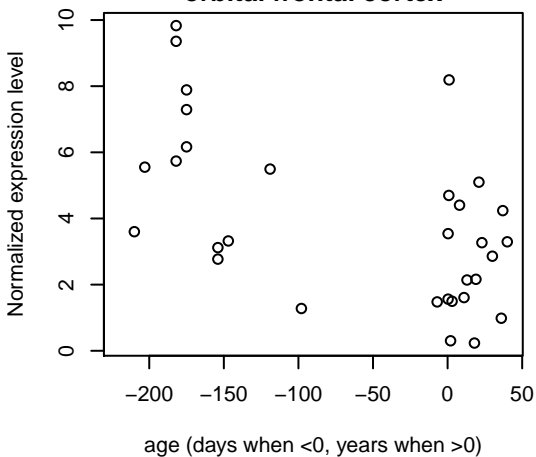

**OPA1\_193321288\_193321346**  
(P=0.6112, Diff = -0.05)  
orbital frontal cortex

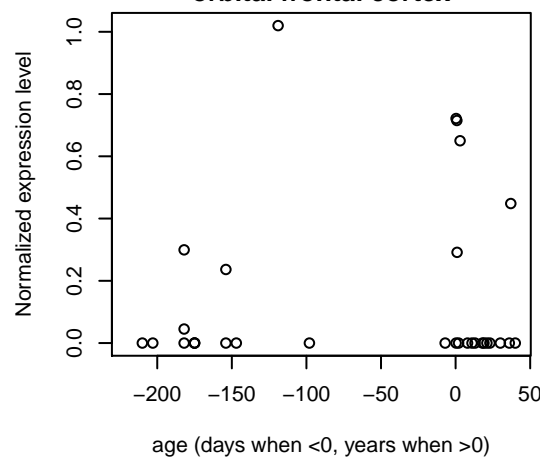

**OPA1\_193332511\_193332830**  
(P=0.4229, Diff = 2.46)  
orbital frontal cortex

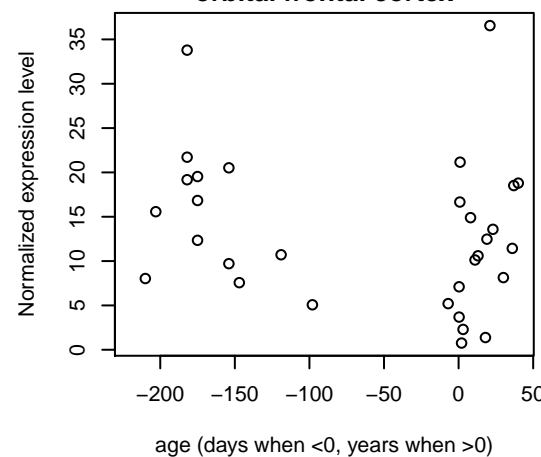

**OPA1\_193333462\_193333559**  
(P=0.6404, Diff = 1.43)  
orbital frontal cortex

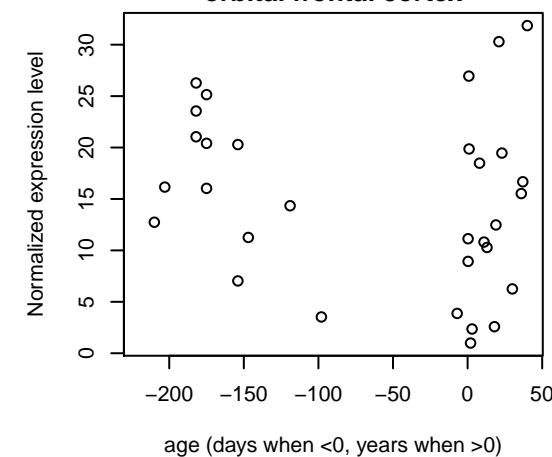

**OPA1\_193334966\_193335074**  
(P=0.8049, Diff = 0.91)  
orbital frontal cortex

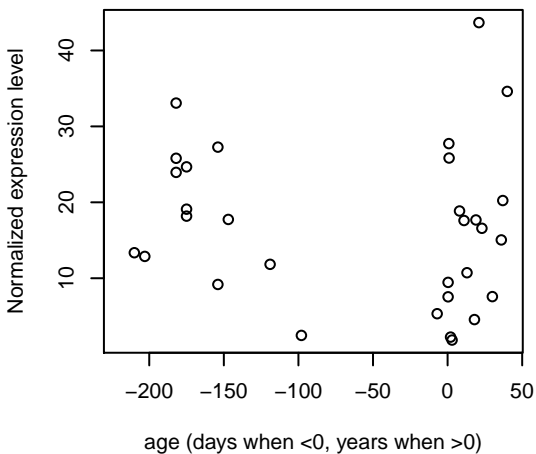

**OPA1\_193335572\_193335626**  
(P=0.6605, Diff = 0.21)  
orbital frontal cortex

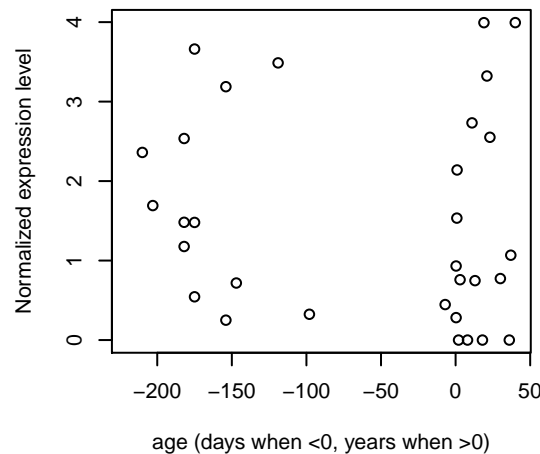

**OPA1\_193336615\_193336726**  
(P=0.2353, Diff = 2.72)  
orbital frontal cortex

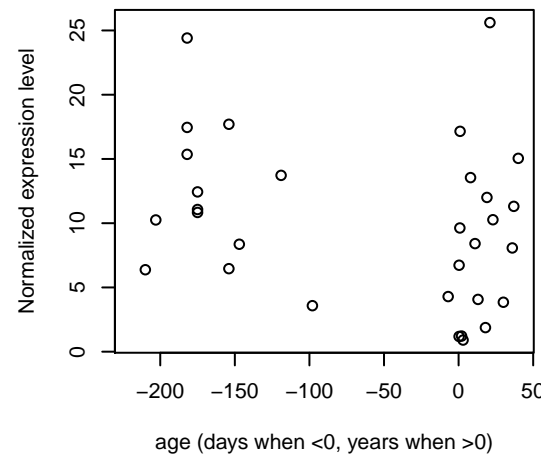

**OPA1\_193343846\_193343991**  
(P=0.1125, Diff = 0.92)  
orbital frontal cortex

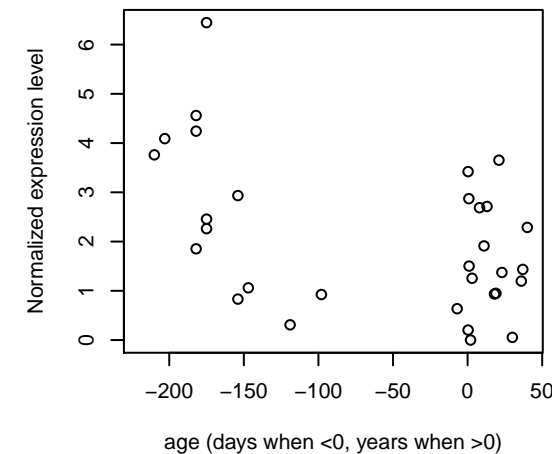

**OPA1\_193346297\_193346333**  
(P=0.3521, Diff = 0.09)  
orbital frontal cortex

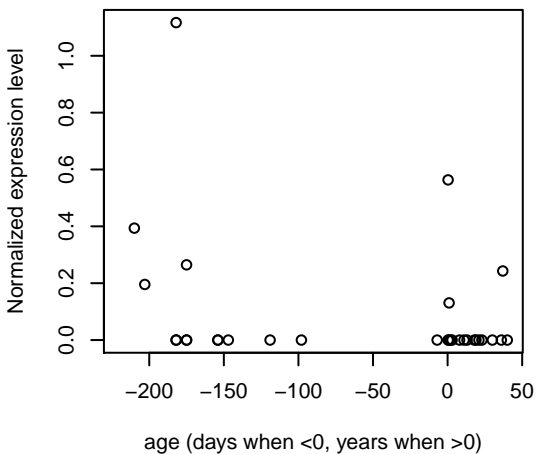

**OPA1\_193349400\_193349454**  
(P=0.2248, Diff = 4.3)  
orbital frontal cortex

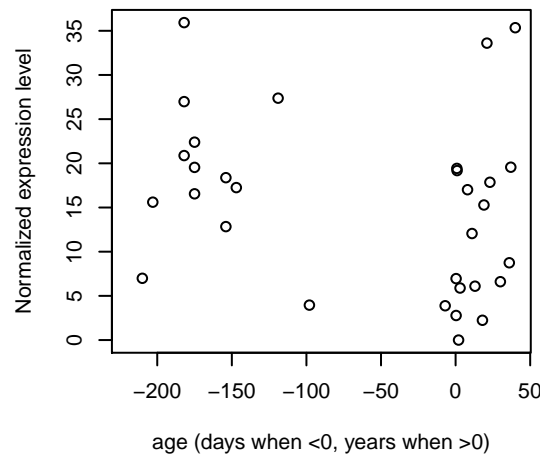

**OPA1\_193353206\_193353311**  
(P=0.6788, Diff = 1.24)  
orbital frontal cortex

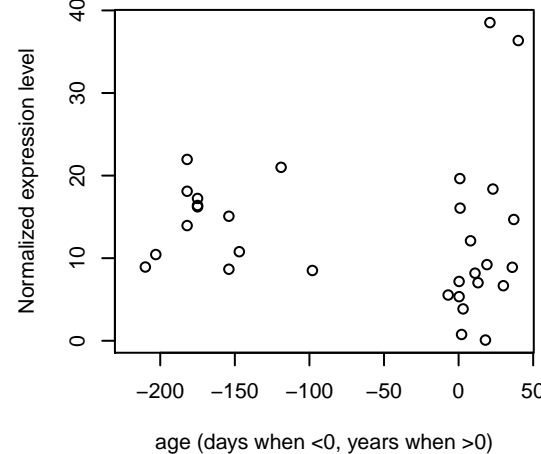

**OPA1\_193354983\_193355070**  
(P=0.8096, Diff = -0.84)  
orbital frontal cortex

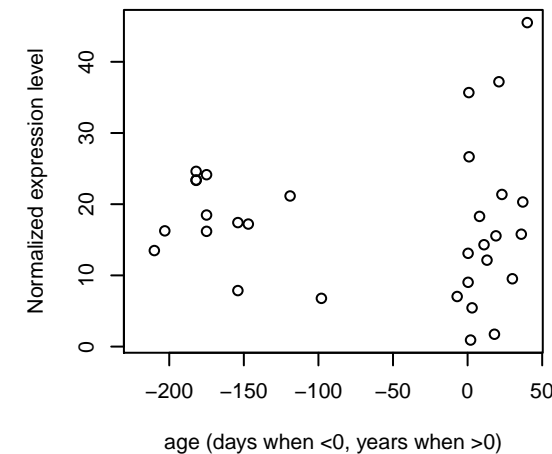

**OPA1\_193355740\_193355854**  
(P=0.2703, Diff = 4.08)  
orbital frontal cortex

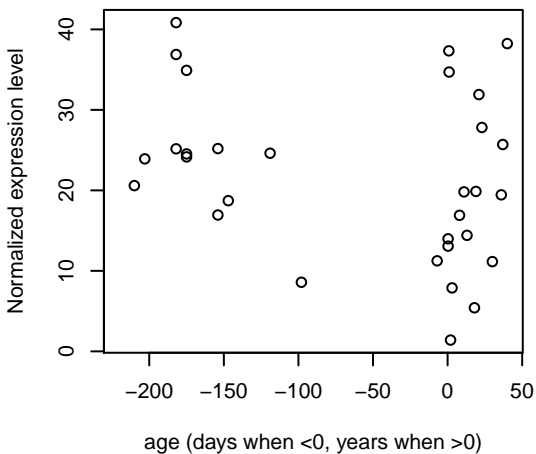

**OPA1\_193360553\_193360634**  
(P=0.7288, Diff = 1.35)  
orbital frontal cortex

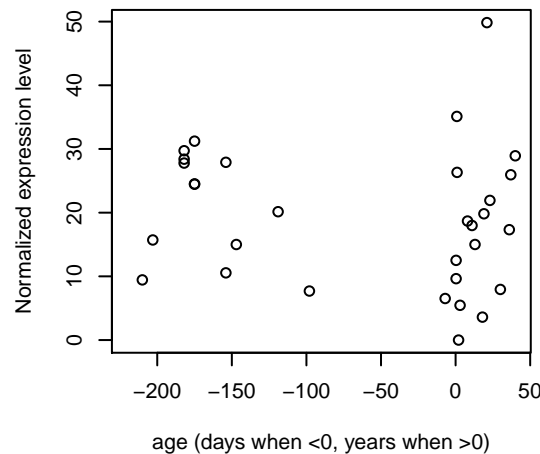

**OPA1\_193360763\_193360838**  
(P=0.752, Diff = 1.18)  
orbital frontal cortex

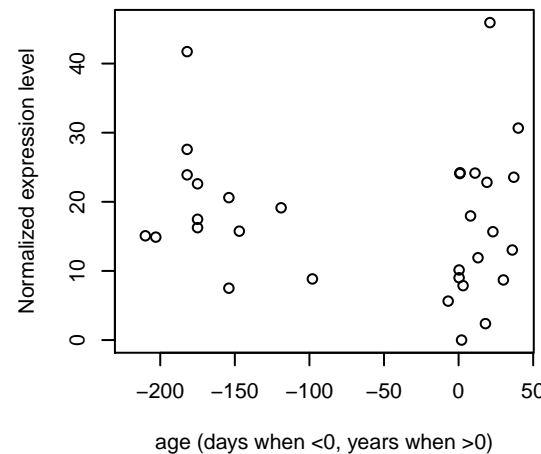

**OPA1\_193361161\_193361233**  
(P=0.7686, Diff = 1.14)  
orbital frontal cortex

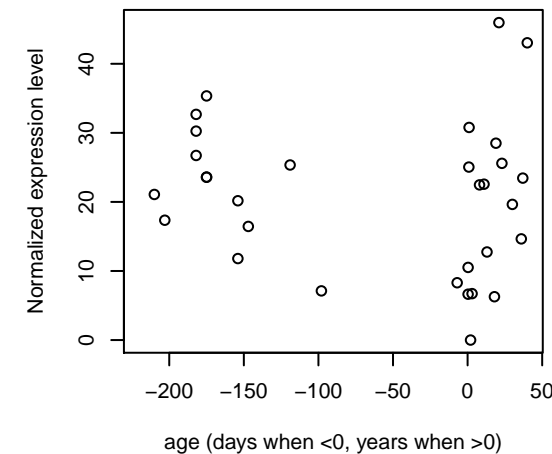

**OPA1\_193361316\_193361416**  
(P=0.7934, Diff = 0.85)  
orbital frontal cortex

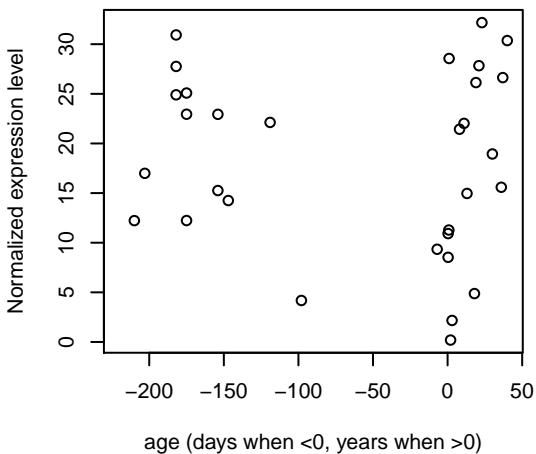

**OPA1\_193361763\_193361940**  
(P=0.5537, Diff = 1.41)  
orbital frontal cortex

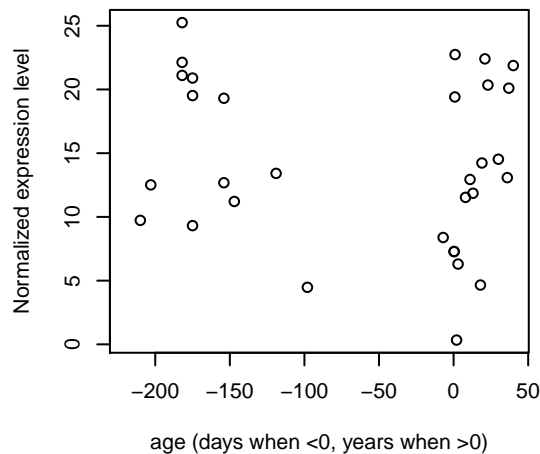

**OPA1\_193363341\_193363414**  
(P=0.8953, Diff = -0.48)  
orbital frontal cortex

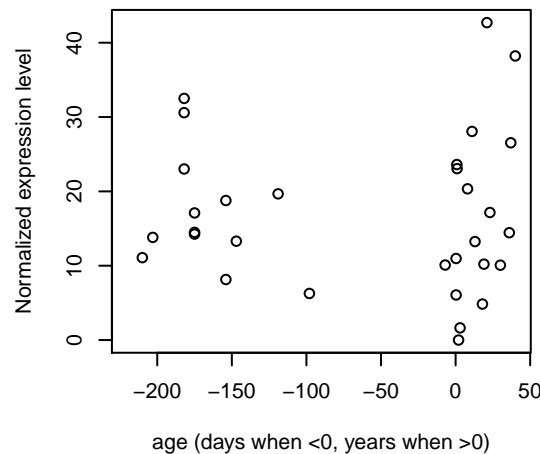

**OPA1\_193363516\_193363589**  
(P=0.4809, Diff = 2.91)  
orbital frontal cortex

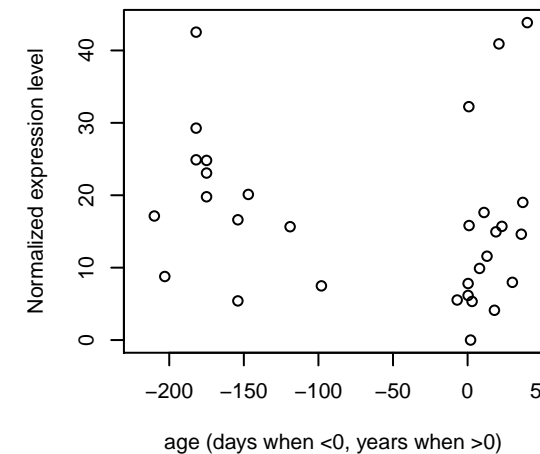

**OPA1\_193364853\_193364969**  
(P=0.8747, Diff = 0.65)  
orbital frontal cortex

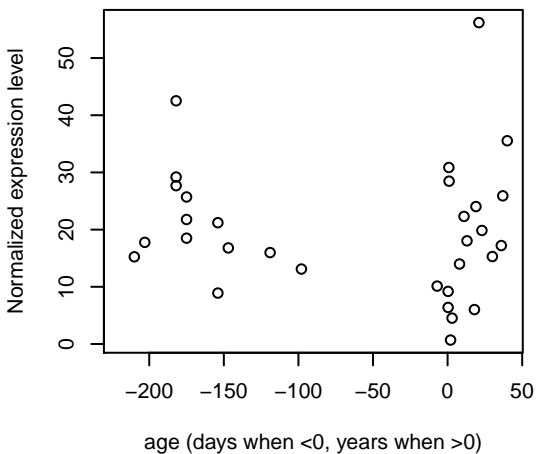

**OPA1\_193365858\_193366249**  
(P=0.7999, Diff = 0.16)  
orbital frontal cortex

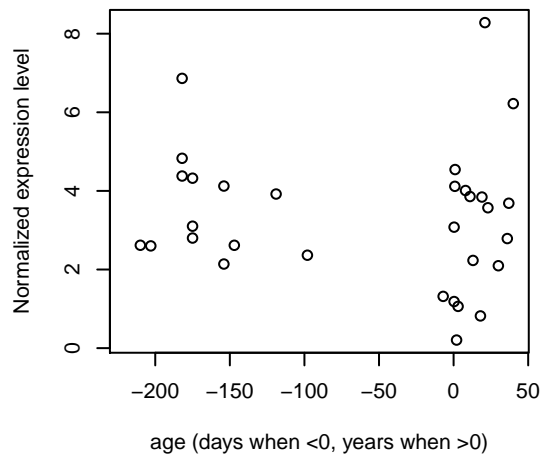

**OPA1\_193366554\_193366660**  
(P=0.8543, Diff = -0.55)  
orbital frontal cortex

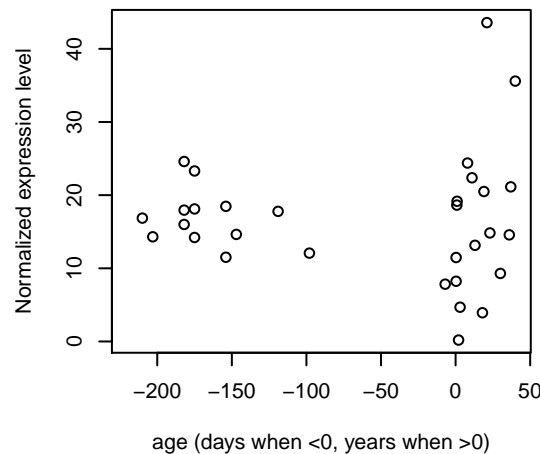

**OPA1\_193372650\_193372816**  
(P=0.7426, Diff = -1.7)  
orbital frontal cortex

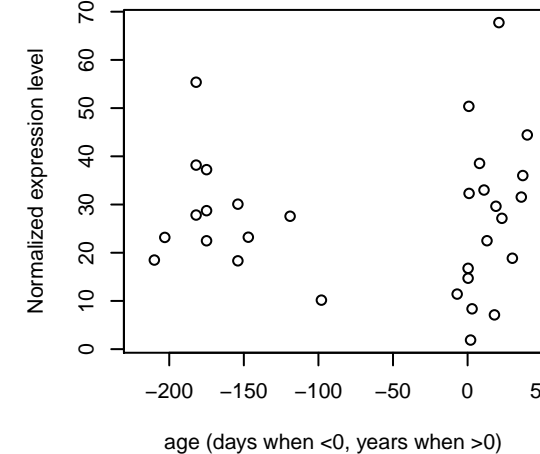

**OPA1\_193374868\_193375021**  
(P=0.8041, Diff = -1.07)  
orbital frontal cortex

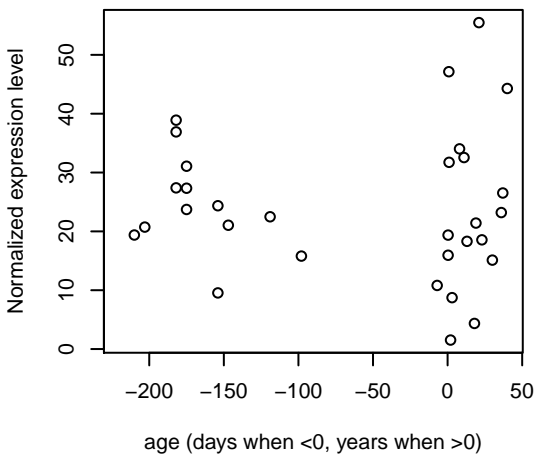

**OPA1\_193376675\_193376784**  
(P=0.6538, Diff = 2.12)  
orbital frontal cortex

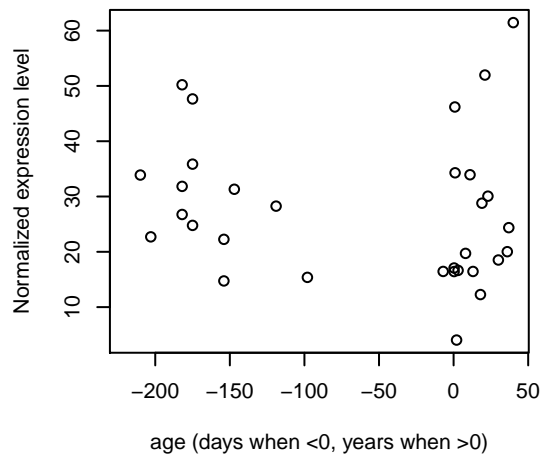

**OPA1\_193377270\_193377350**  
(P=0.5438, Diff = -2.29)  
orbital frontal cortex

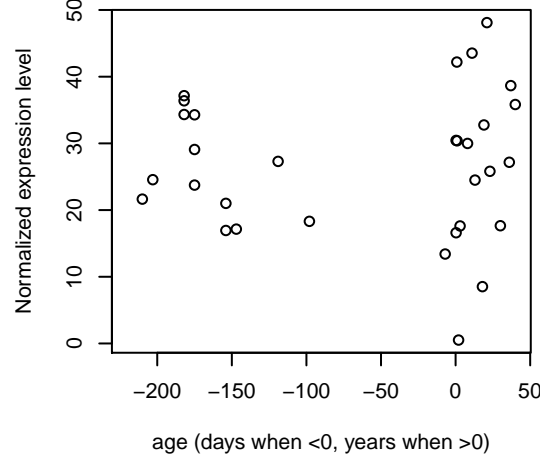

**OPA1\_193380610\_193380751**  
(P=0.8952, Diff = -0.85)  
orbital frontal cortex

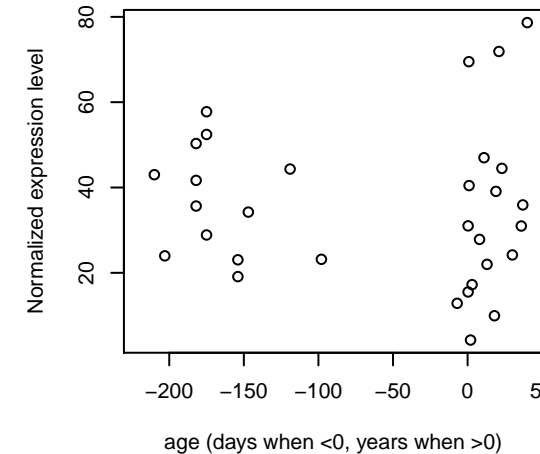

**OPA1\_193382668\_193382785**  
(P=0.3785, Diff = -3.91)  
orbital frontal cortex

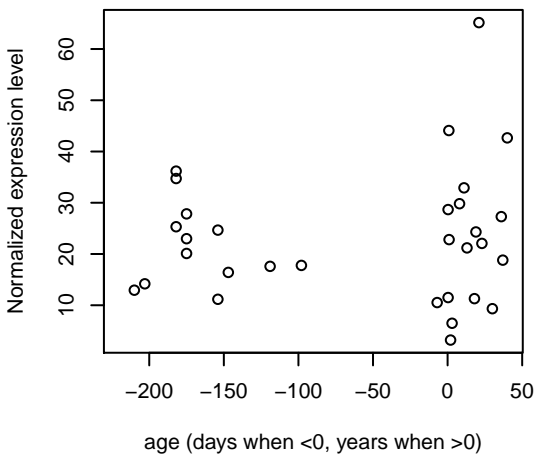

**OPA1\_193384084\_193384178**  
(P=0.9503, Diff = 0.33)  
orbital frontal cortex

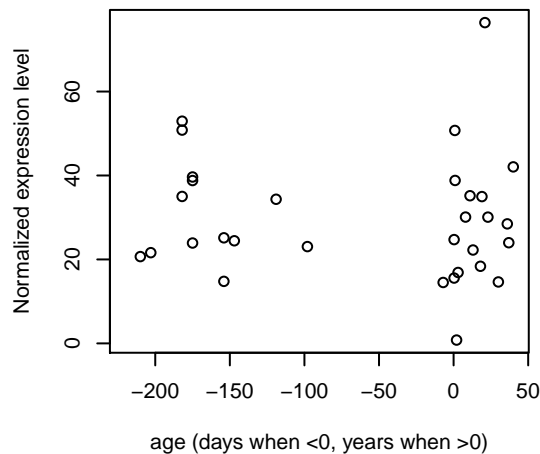

**OPA1\_193384958\_193385069**  
(P=0.7001, Diff = -1.82)  
orbital frontal cortex

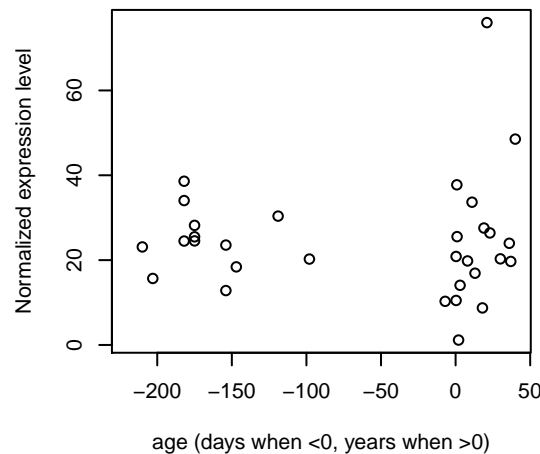

**OPA1\_193385159\_193385244**  
(P=0.3027, Diff = -0.07)  
orbital frontal cortex

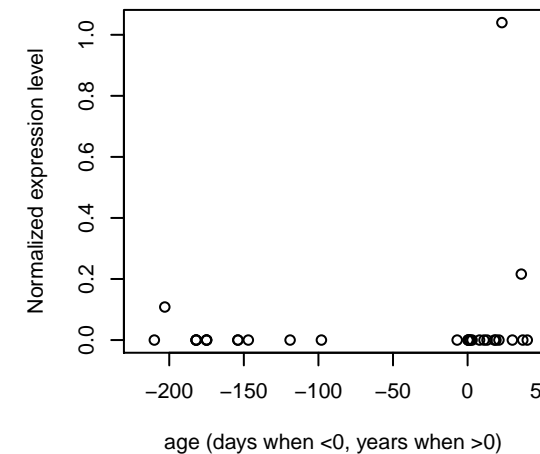

**OPA1\_193386103\_193386720**  
(P=0.8657, Diff = 0.01)  
orbital frontal cortex

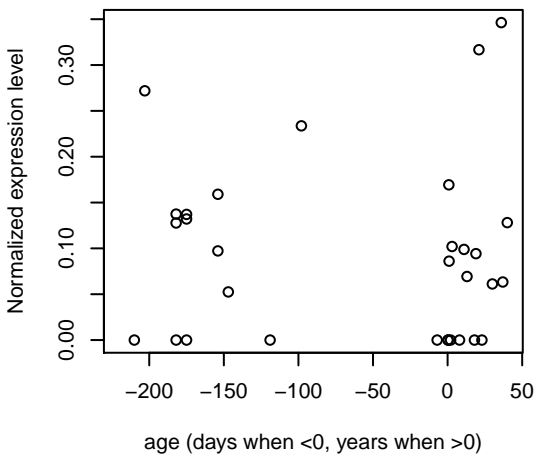

**OPA1\_193409182\_193409921**  
(P=0.6478, Diff = -0.22)  
orbital frontal cortex

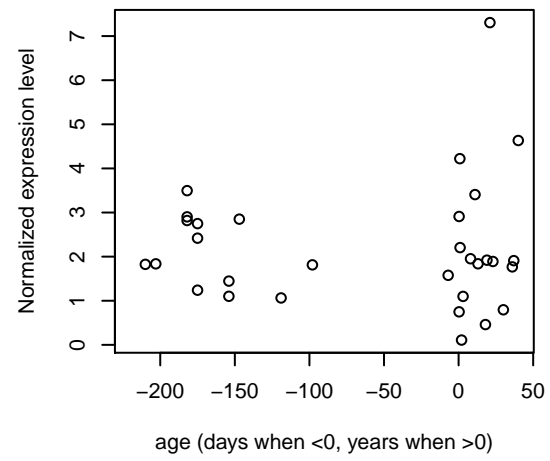

**OPA1\_193412394\_193415612**  
(P=0.1517, Diff = -4.76)  
orbital frontal cortex

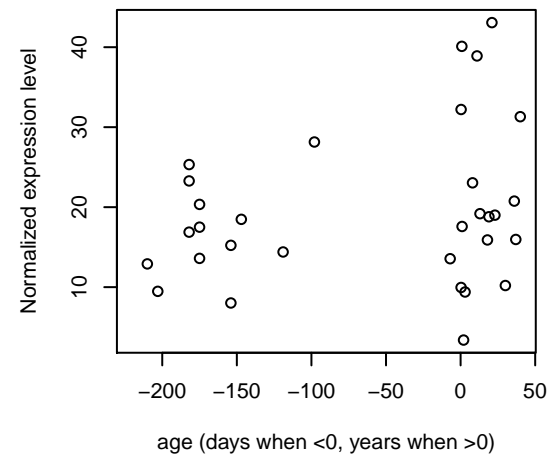

**ZMAT4\_40388108\_40389757**  
(P=0, Diff = -6.74)  
orbital frontal cortex

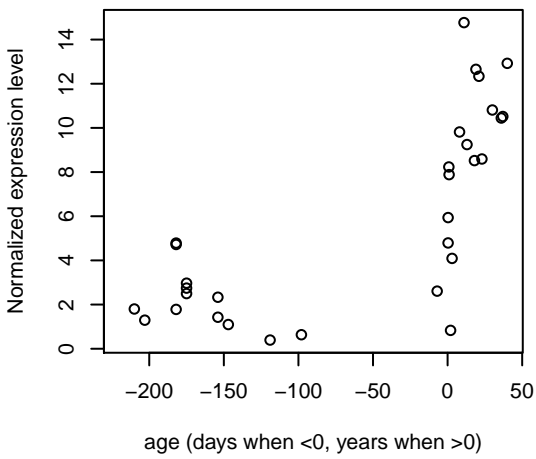

**ZMAT4\_40438683\_40438780**  
(P=0.0017, Diff = -6.59)  
orbital frontal cortex

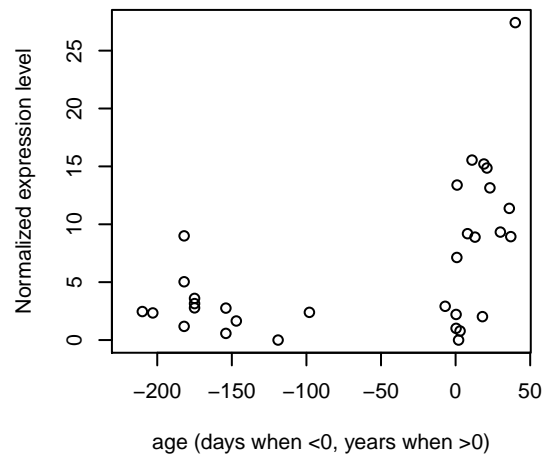

**ZMAT4\_40531882\_40532450**  
(P=5e-04, Diff = -1.57)  
orbital frontal cortex

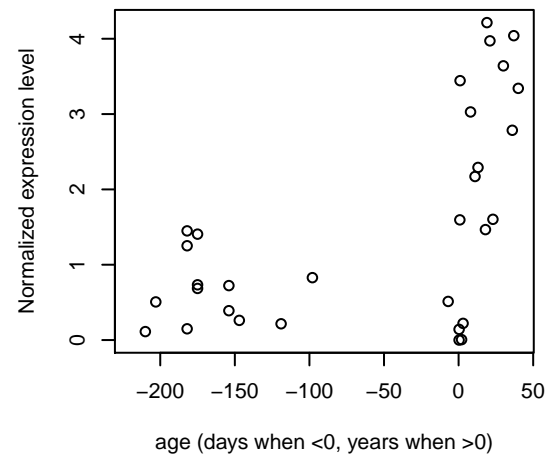

**ZMAT4\_40554514\_40554920**  
(P=0.0019, Diff = -1.56)  
orbital frontal cortex

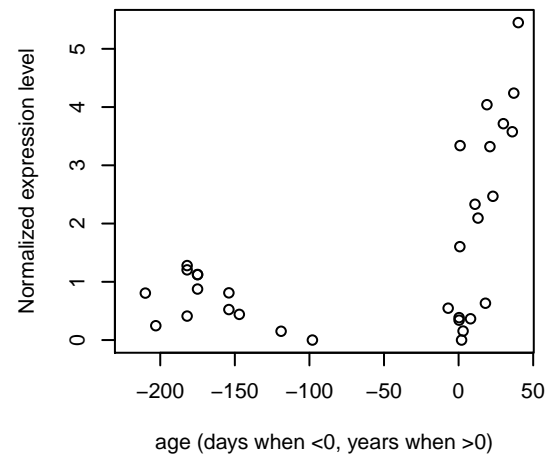

**ZMAT4\_40625159\_40625249**  
(P=7e-04, Diff = -5.4)  
orbital frontal cortex

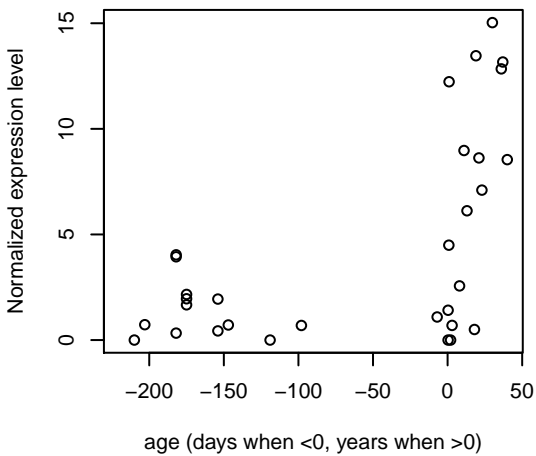

**ZMAT4\_40644207\_40644301**  
(P=0.1212, Diff = -0.17)  
orbital frontal cortex

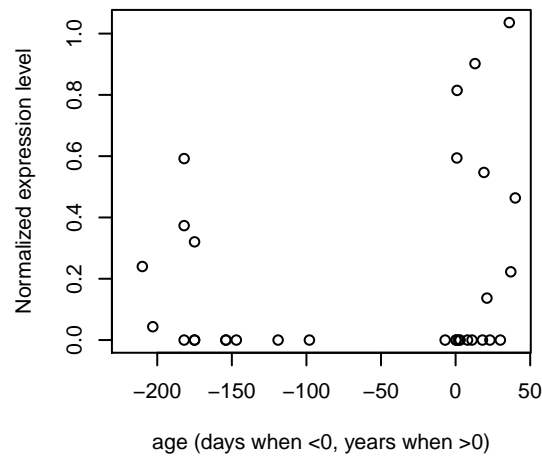

**ZMAT4\_40666027\_40666090**  
(P=0.1009, Diff = 0.14)  
orbital frontal cortex

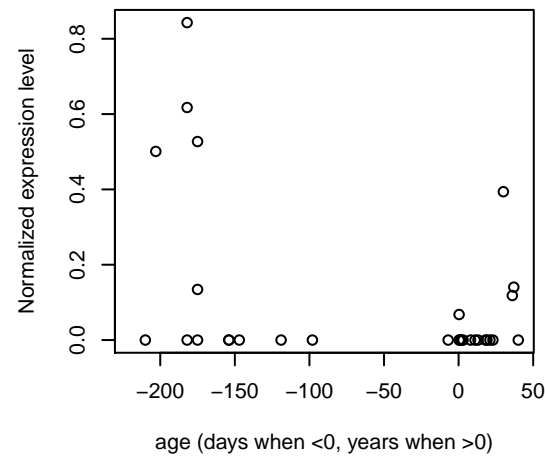

**ZMAT4\_40683093\_40683199**  
(P=0.002, Diff = -4.95)  
orbital frontal cortex

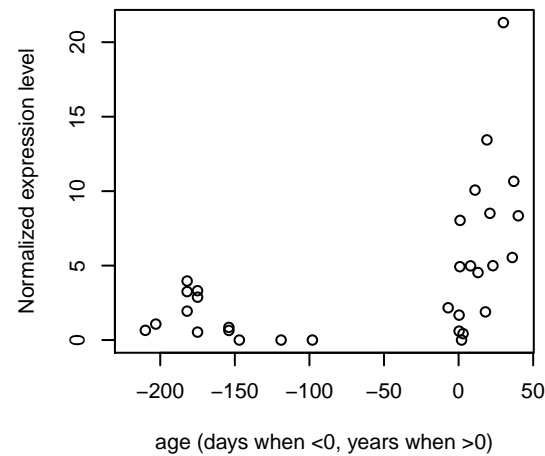

**ZMAT4\_40742047\_40742463**  
(P=1e-04, Diff = -0.2)  
orbital frontal cortex

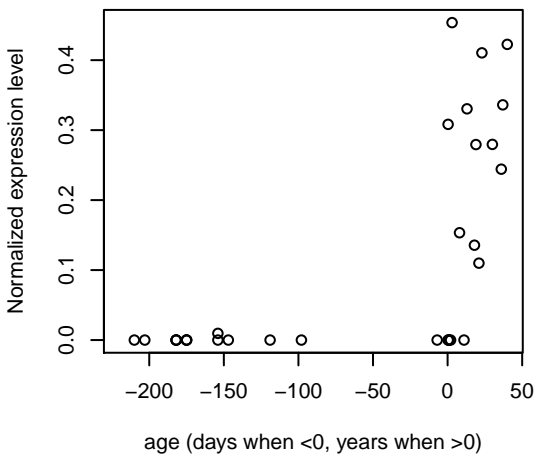

**ZMAT4\_40746013\_40746064**  
(P=0.3322, Diff = -0.03)  
orbital frontal cortex

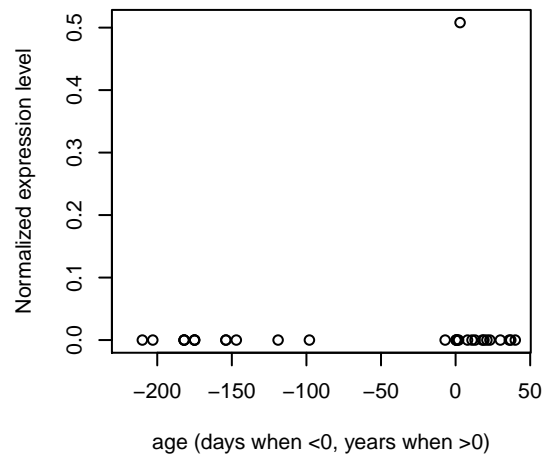

**ZMAT4\_40755201\_40755352**  
(P=0.0137, Diff = -1.49)  
orbital frontal cortex

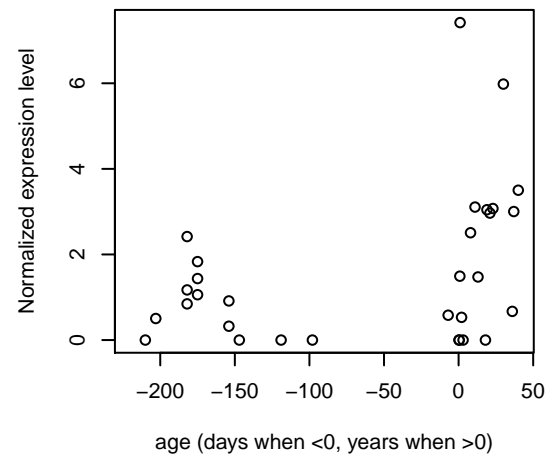

**CNDP1\_72201674\_72201926**  
( $P=4e-04$ , Diff =  $-7.59$ )  
orbital frontal cortex

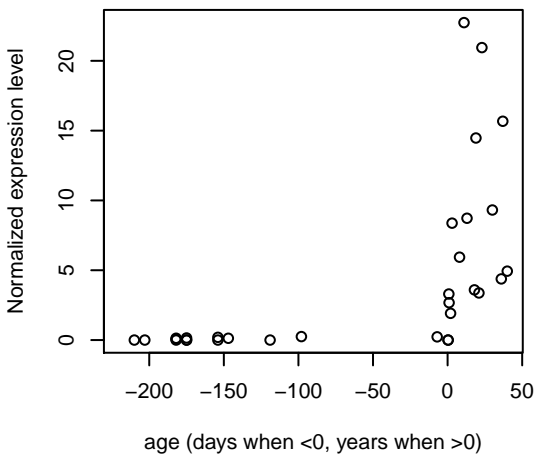

**CNDP1\_72223572\_72223701**  
( $P=5e-04$ , Diff =  $-14.94$ )  
orbital frontal cortex

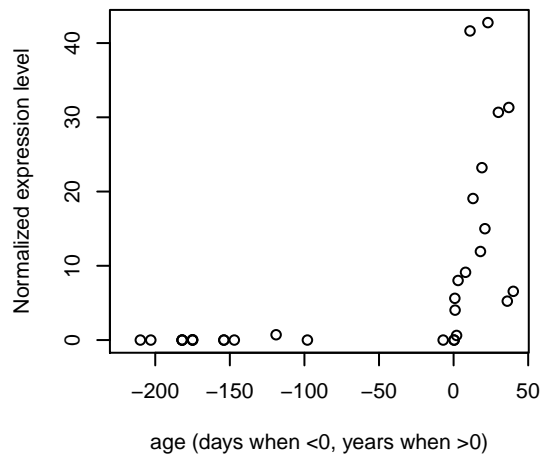

**CNDP1\_72226557\_72226707**  
( $P=4e-04$ , Diff =  $-16.42$ )  
orbital frontal cortex

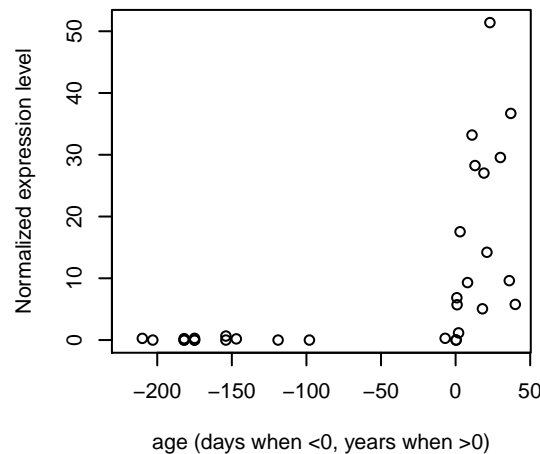

**CNDP1\_72228090\_72228253**  
( $P=3e-04$ , Diff =  $-22.26$ )  
orbital frontal cortex

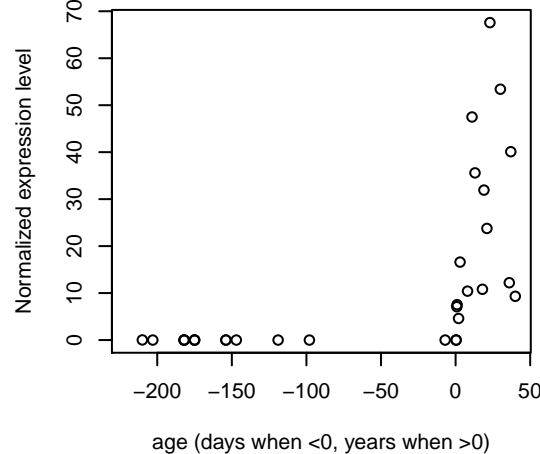

**CNDP1\_72229281\_72229370**  
( $P=6e-04$ , Diff =  $-35.18$ )  
orbital frontal cortex

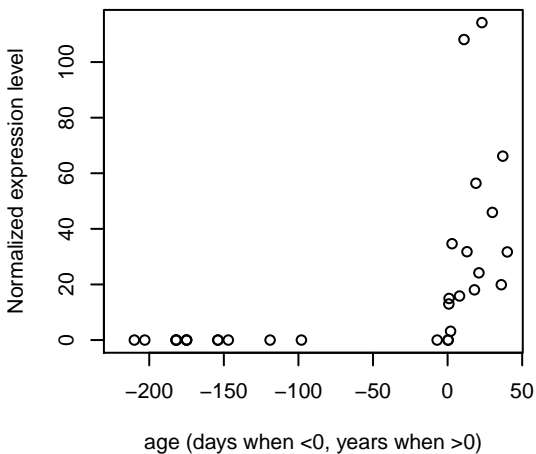

**CNDP1\_72234467\_72234668**  
( $P=5e-04$ , Diff =  $-34.92$ )  
orbital frontal cortex

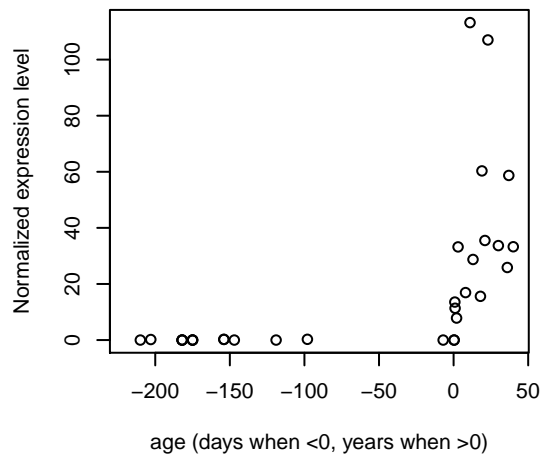

**CNDP1\_72238420\_72238505**  
( $P=0.0011$ , Diff =  $-39.67$ )  
orbital frontal cortex

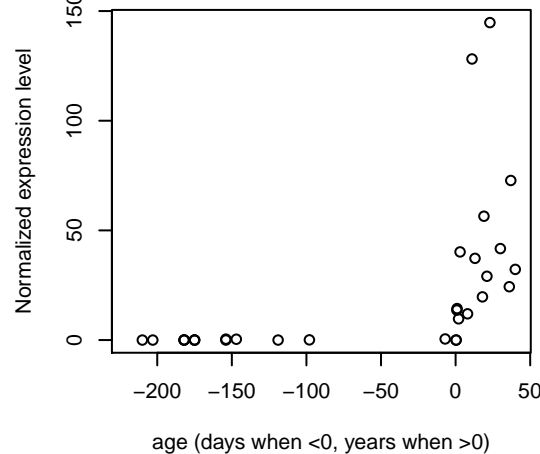

**CNDP1\_72244103\_72244264**  
( $P=0.0011$ , Diff =  $-27.96$ )  
orbital frontal cortex

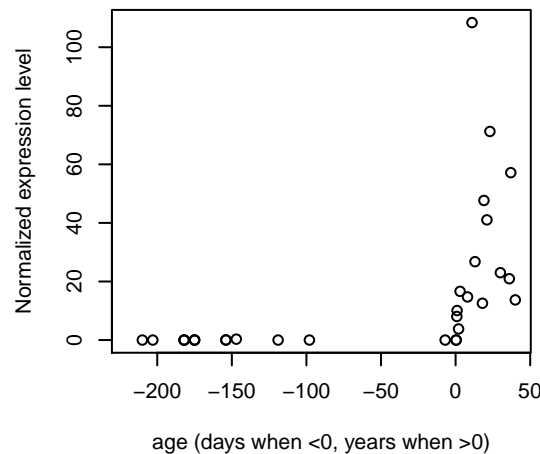

**CNDP1\_72245397\_72245562**  
( $P=7e-04$ , Diff =  $-36.05$ )  
orbital frontal cortex

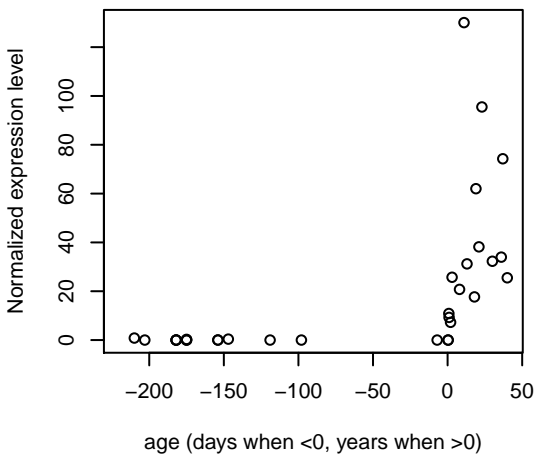

**CNDP1\_72247365\_72247507**  
( $P=7e-04$ , Diff =  $-44.52$ )  
orbital frontal cortex

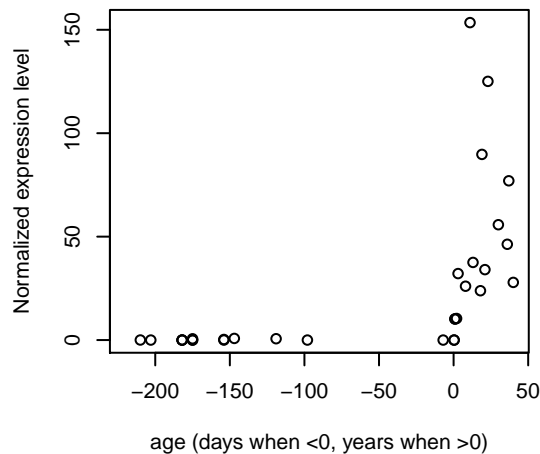

**CNDP1\_72250796\_72250944**  
( $P=5e-04$ , Diff =  $-43.54$ )  
orbital frontal cortex

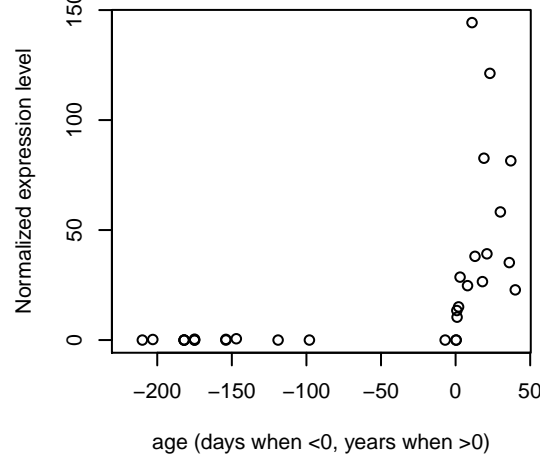

**CNDP1\_72251731\_72252261**  
( $P=2e-04$ , Diff =  $-27.08$ )  
orbital frontal cortex

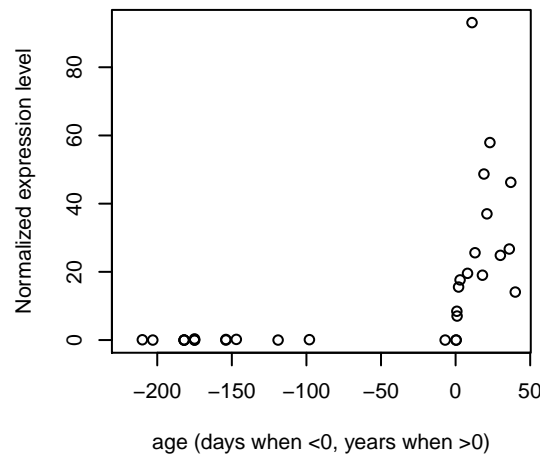



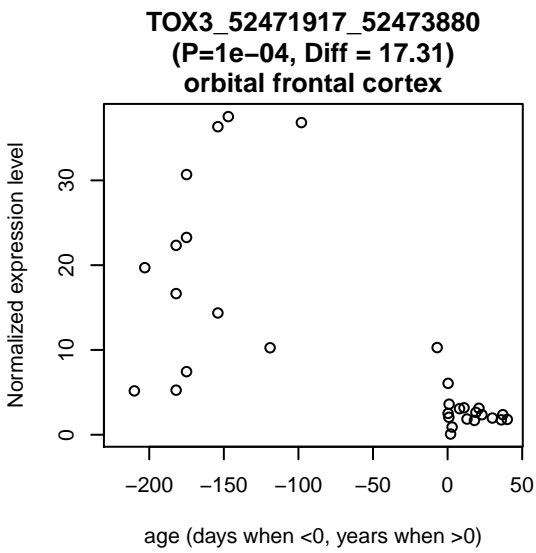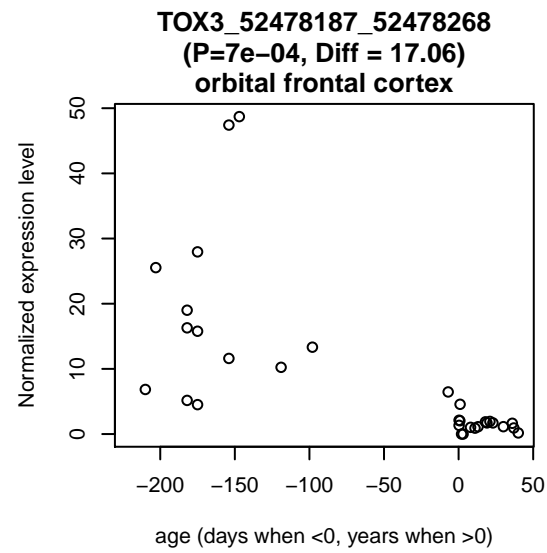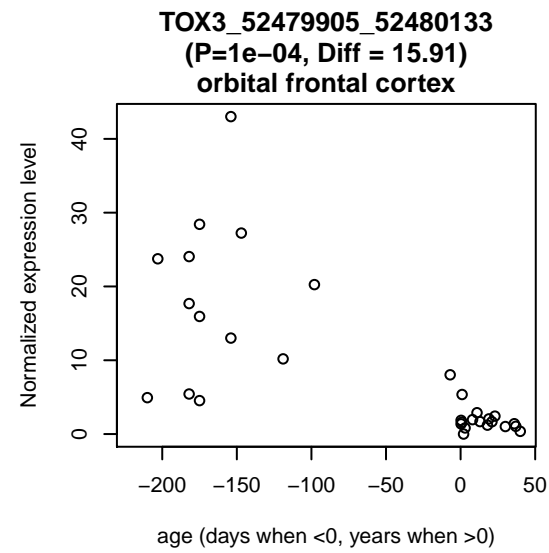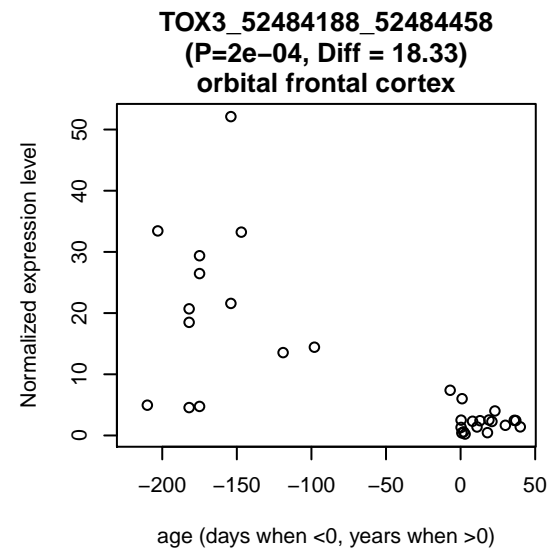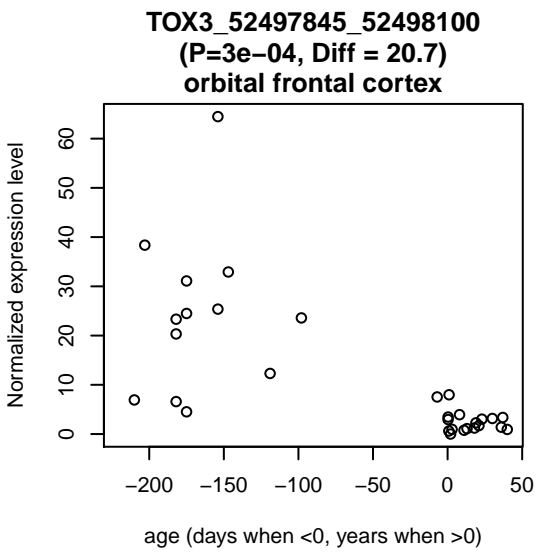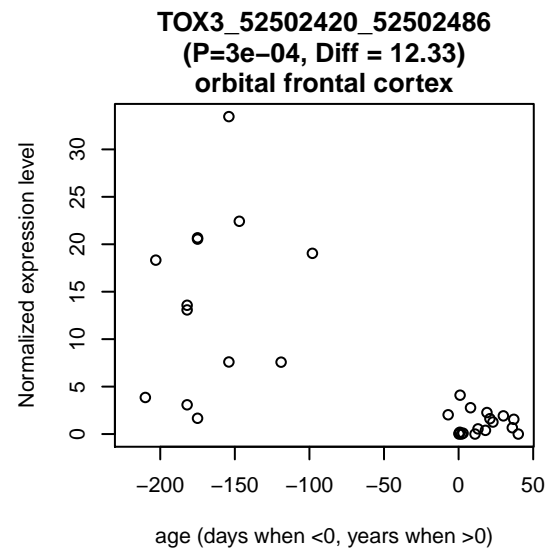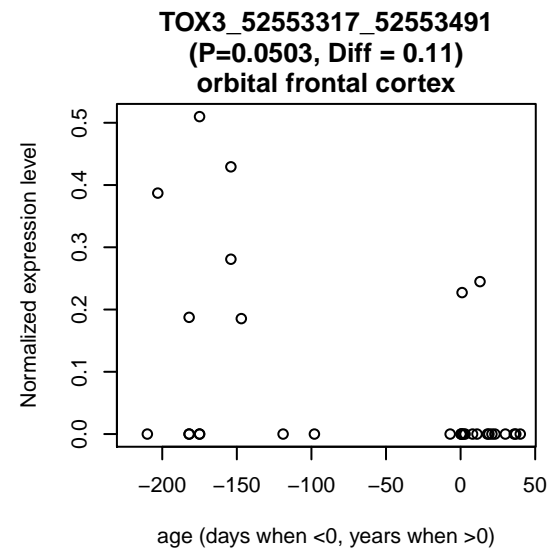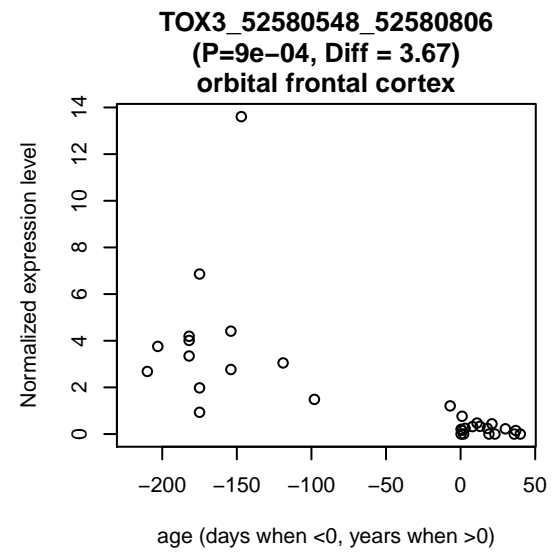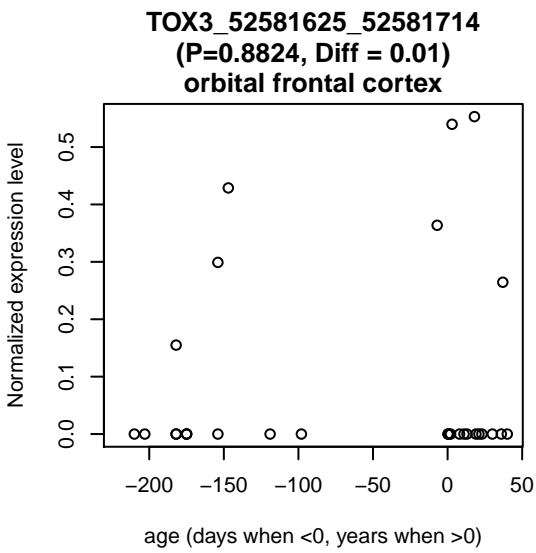

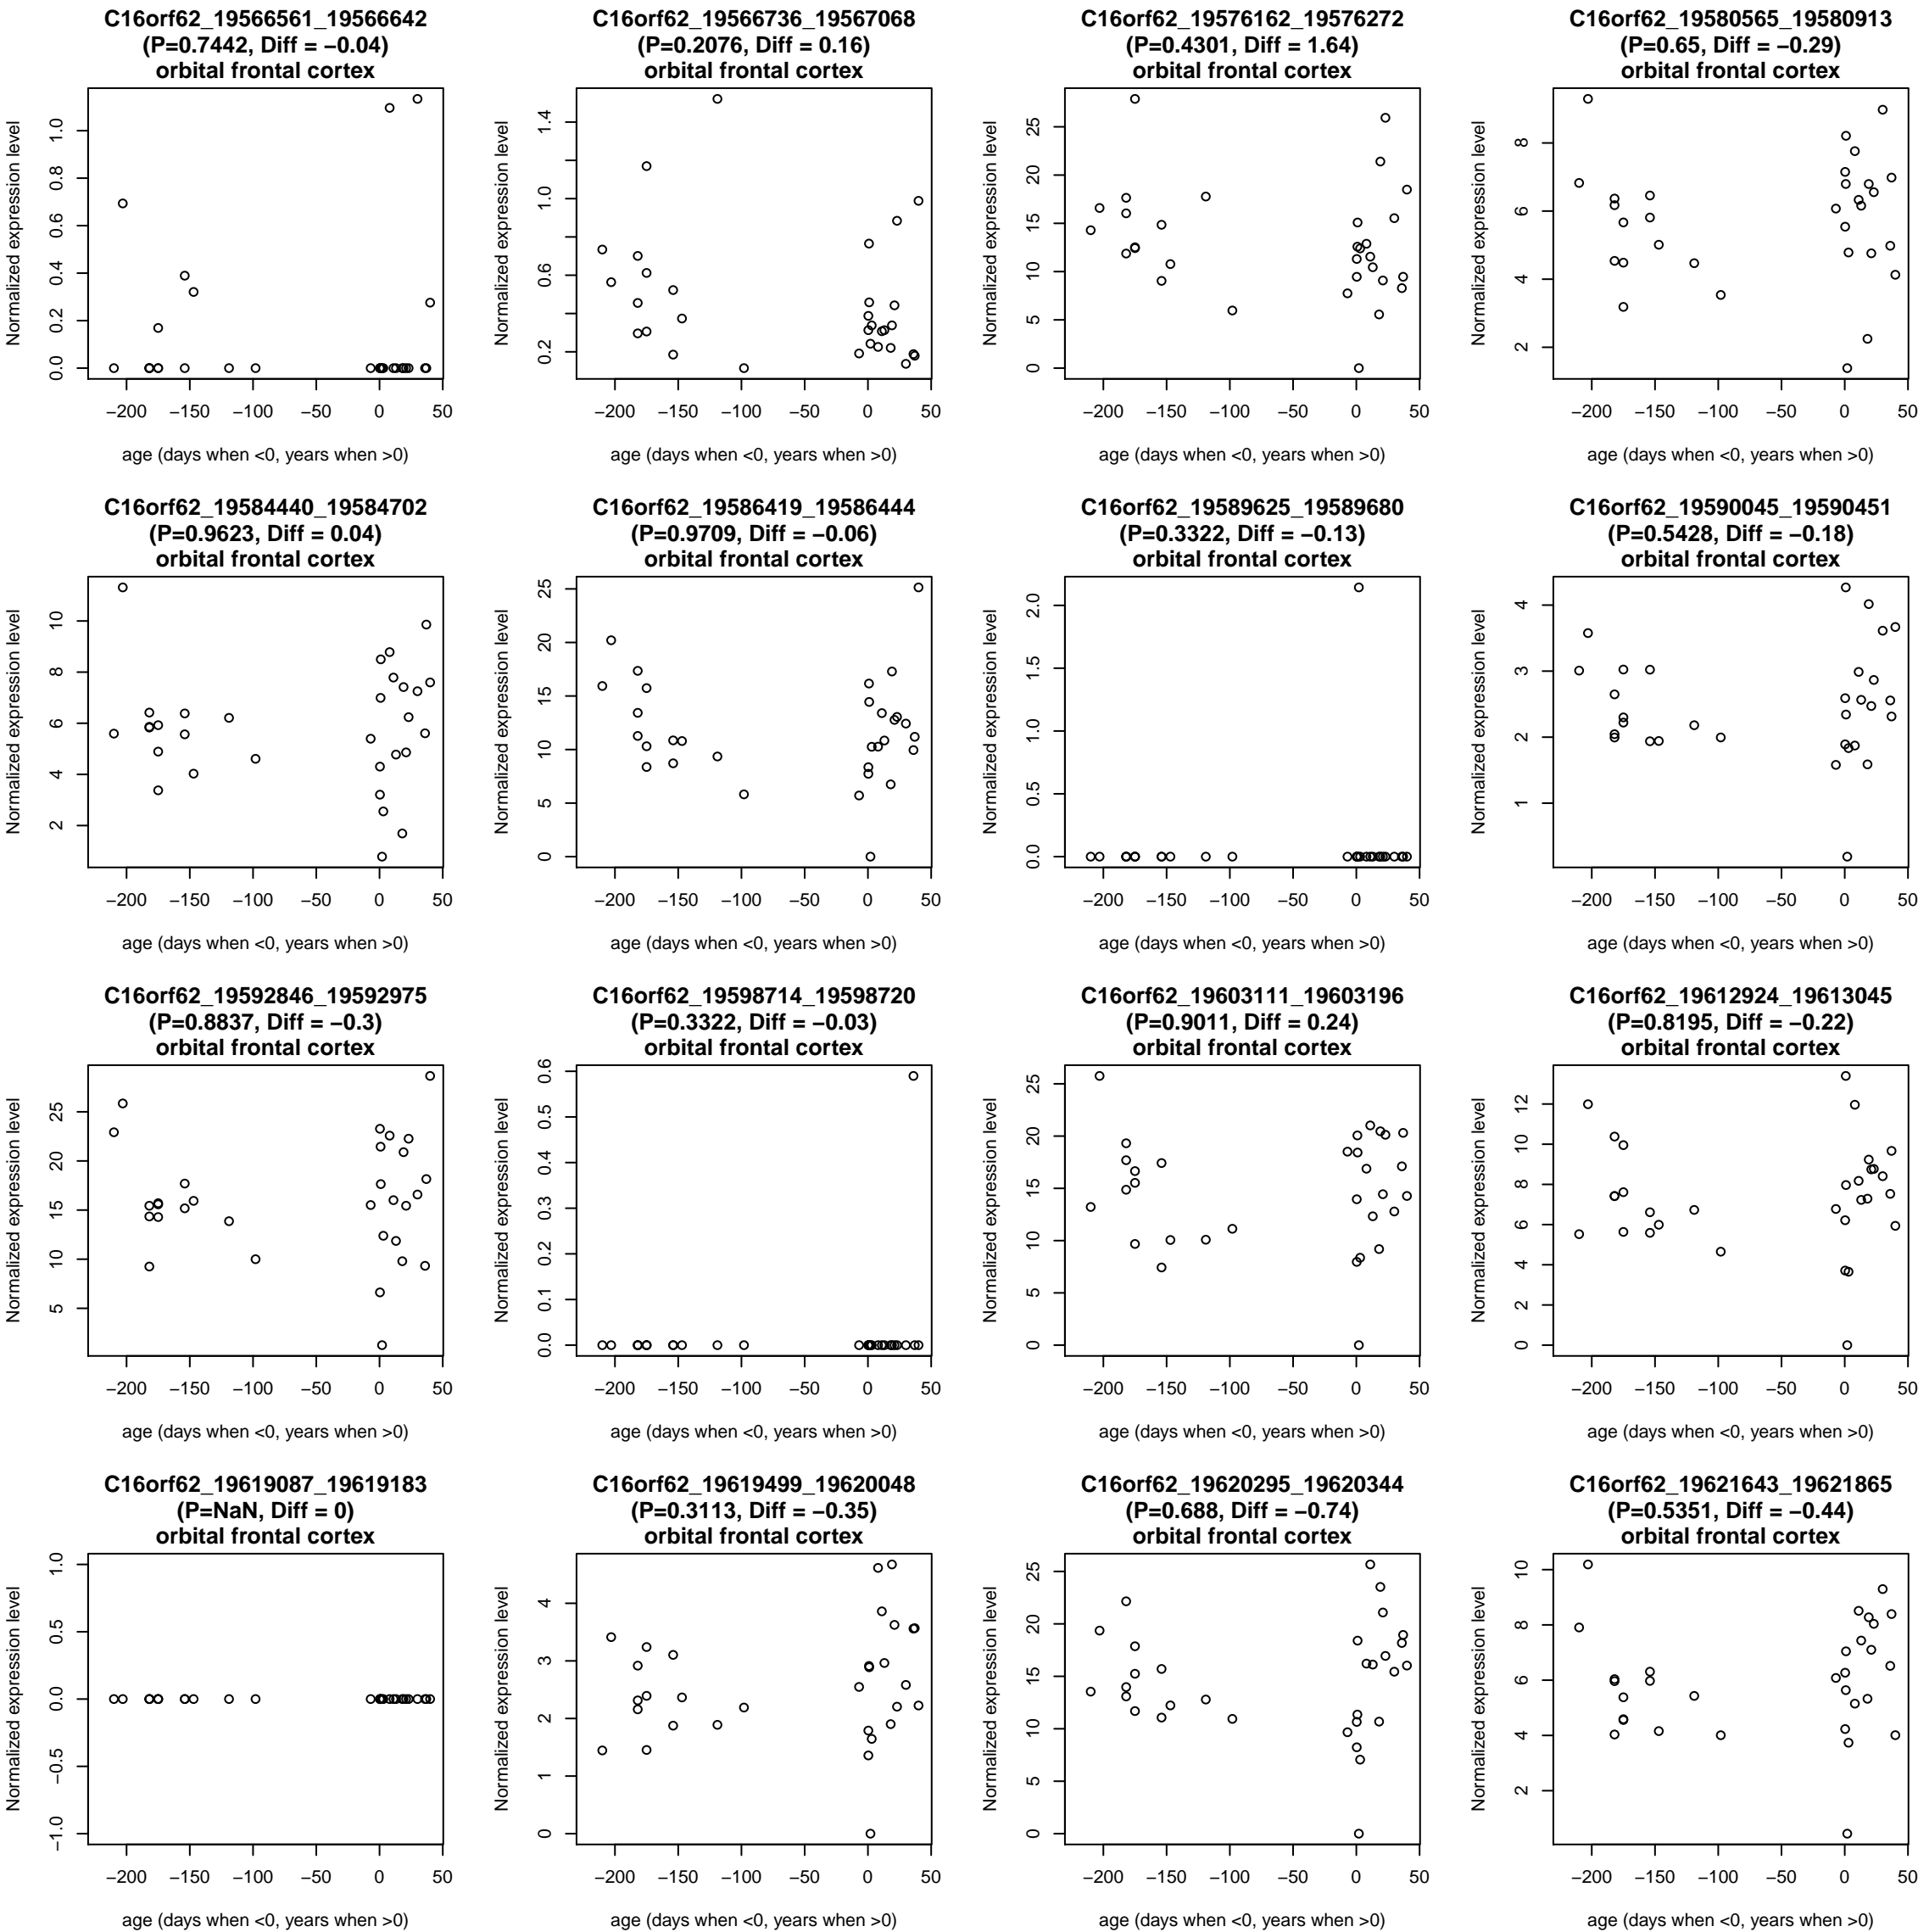

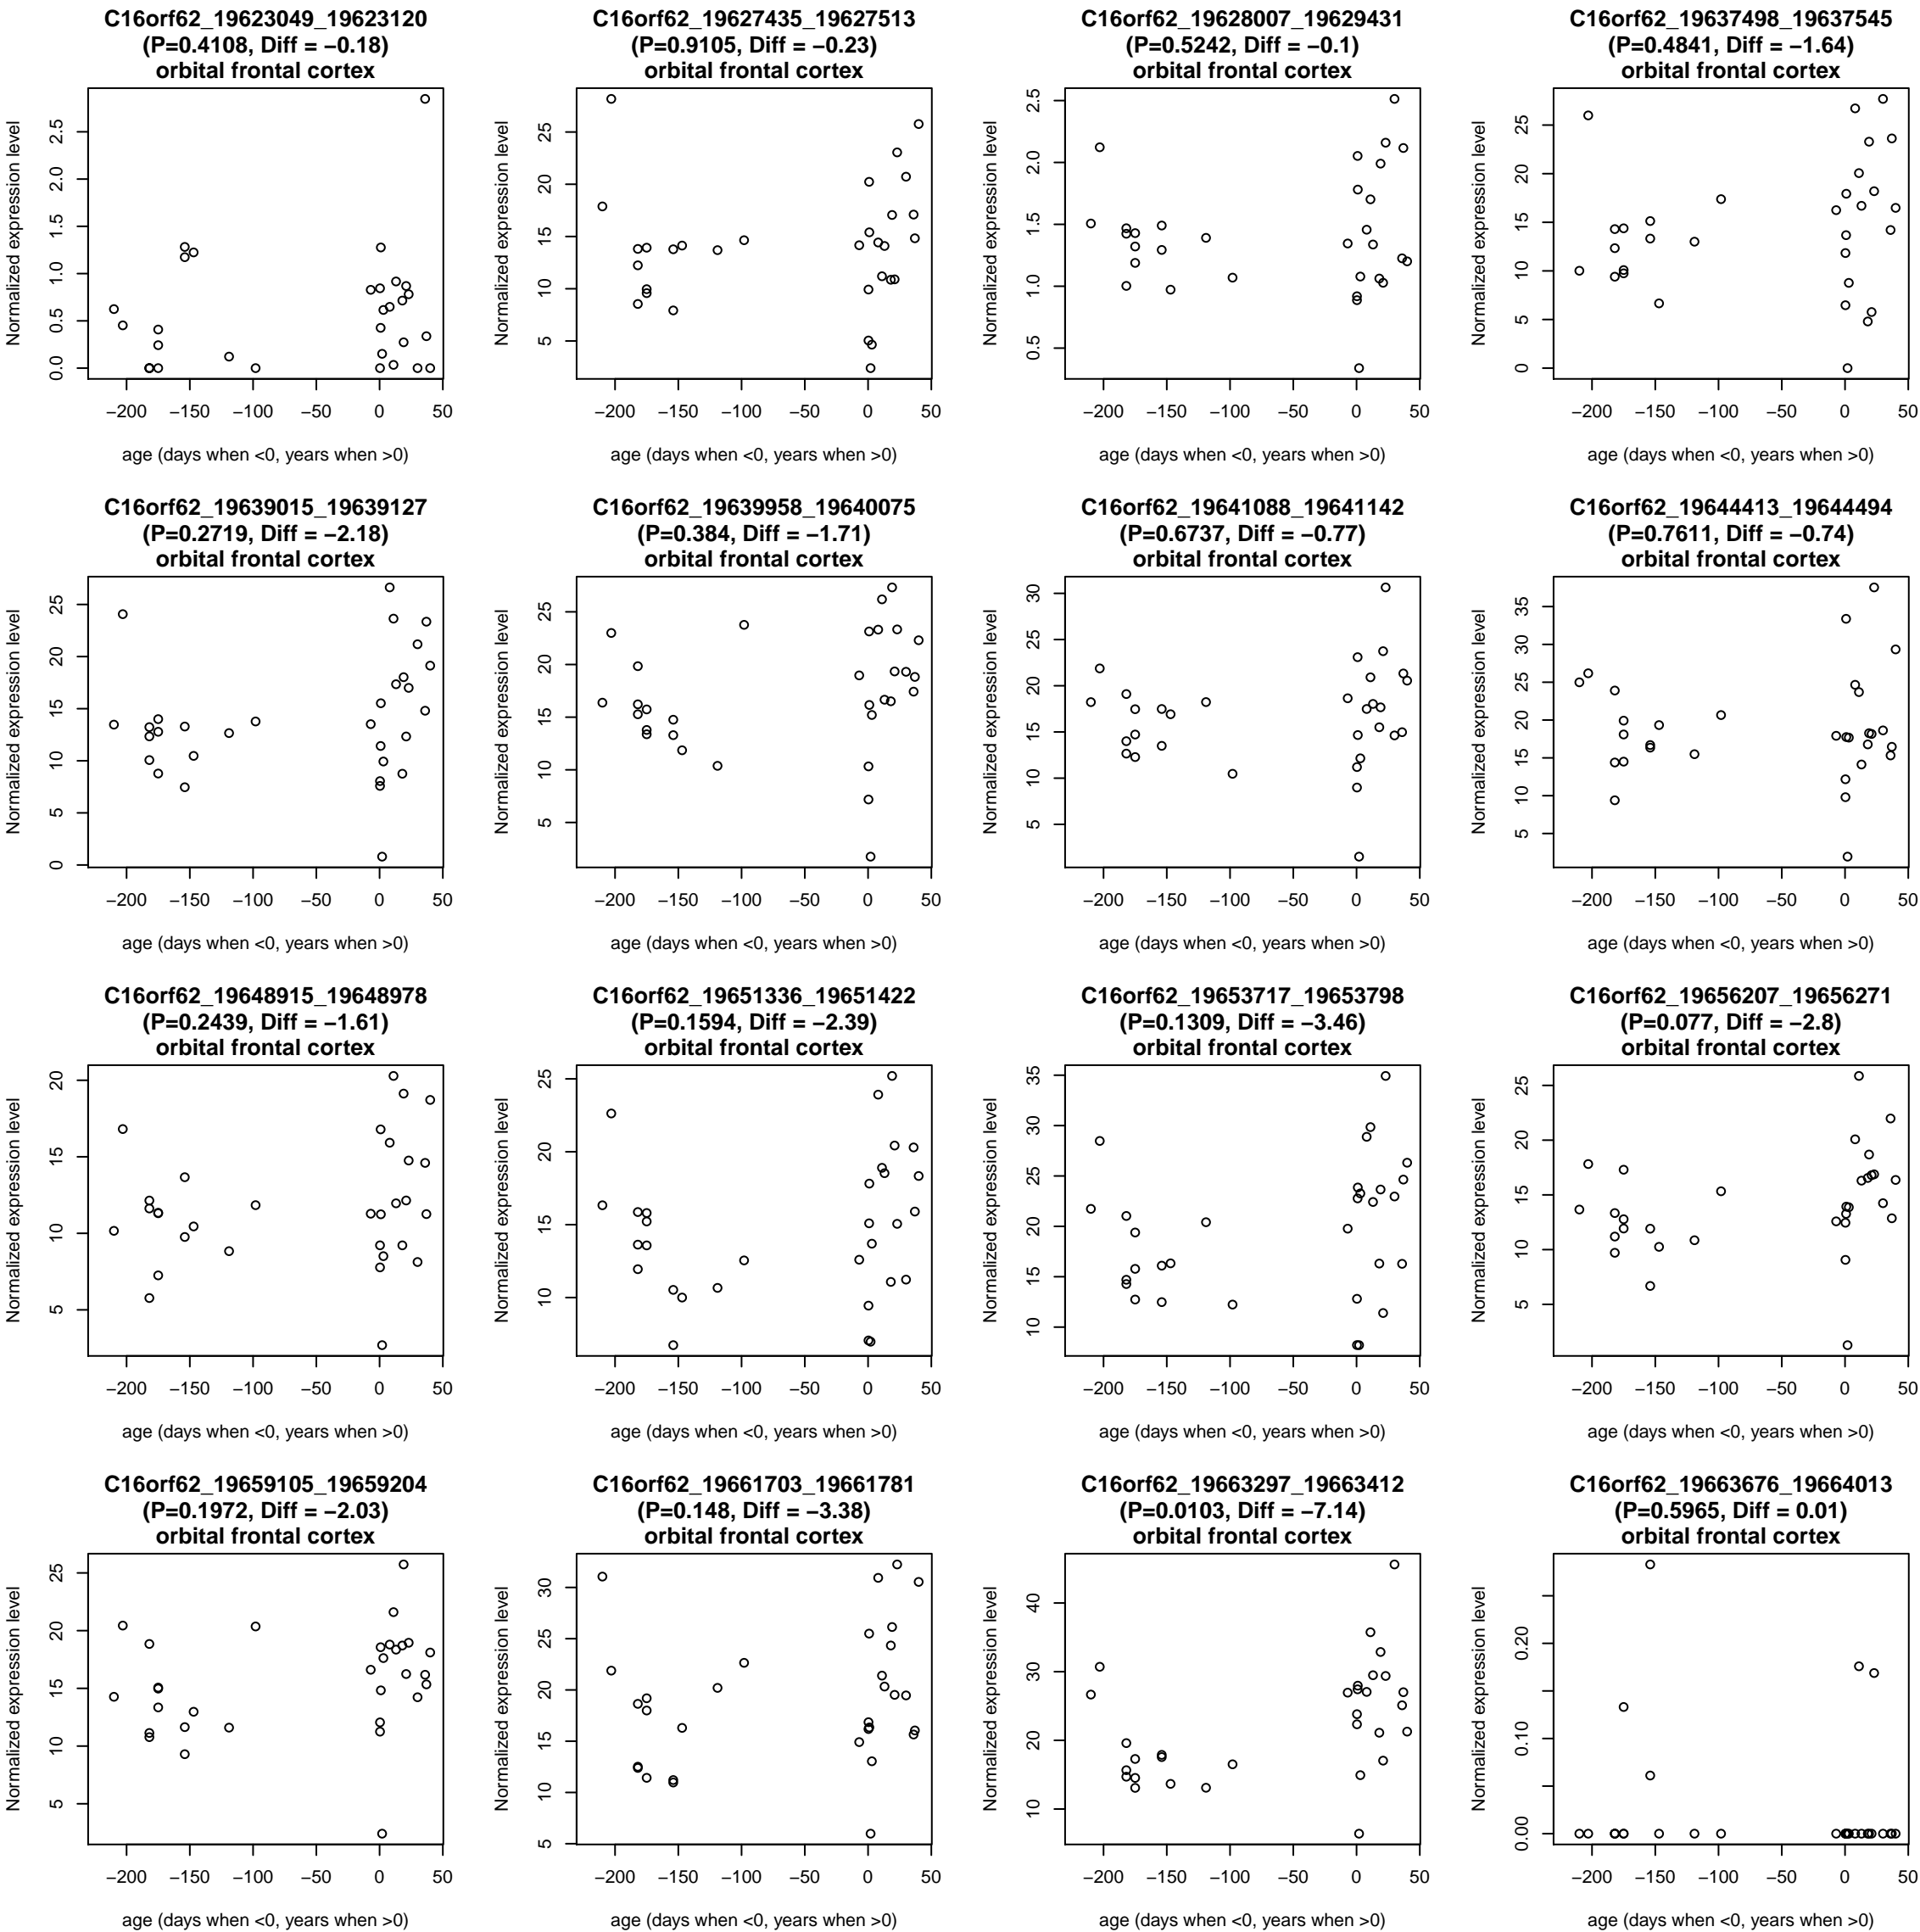

**C16orf62\_19680481\_19680621**  
(P=0.0314, Diff = -4.28)  
orbital frontal cortex

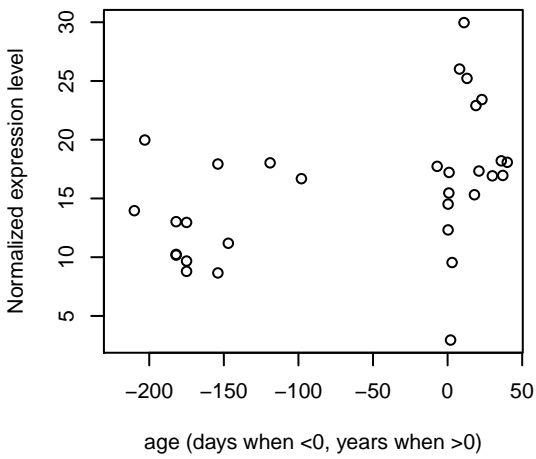

**C16orf62\_19693546\_19693712**  
(P=0.0052, Diff = -7.48)  
orbital frontal cortex

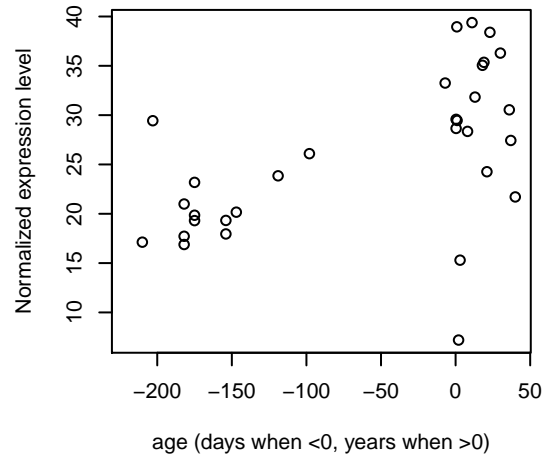

**C16orf62\_19702674\_19702793**  
(P=0.0333, Diff = -7.24)  
orbital frontal cortex

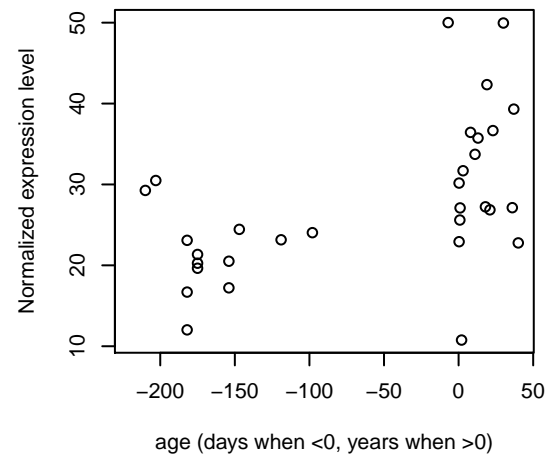

**C16orf62\_19710823\_19710970**  
(P=0.0127, Diff = -9.74)  
orbital frontal cortex

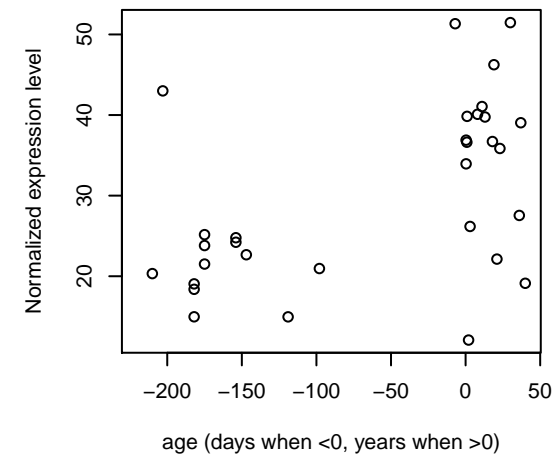

**C16orf62\_19711699\_19712448**  
(P=0.0044, Diff = -2.98)  
orbital frontal cortex

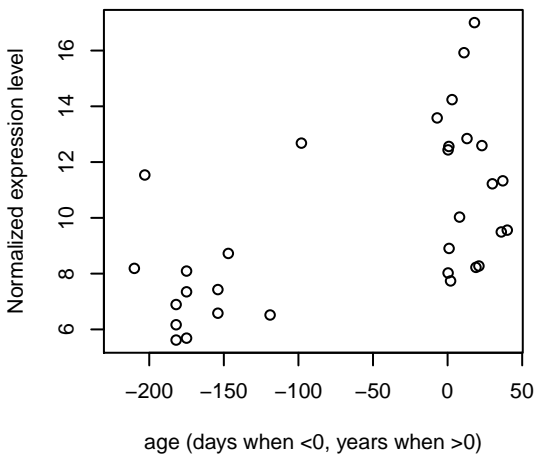

**C16orf62\_19716437\_19716880**  
(P=0.0944, Diff = 0.88)  
orbital frontal cortex

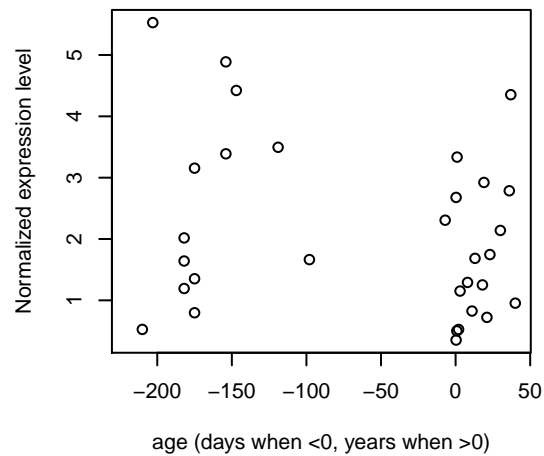

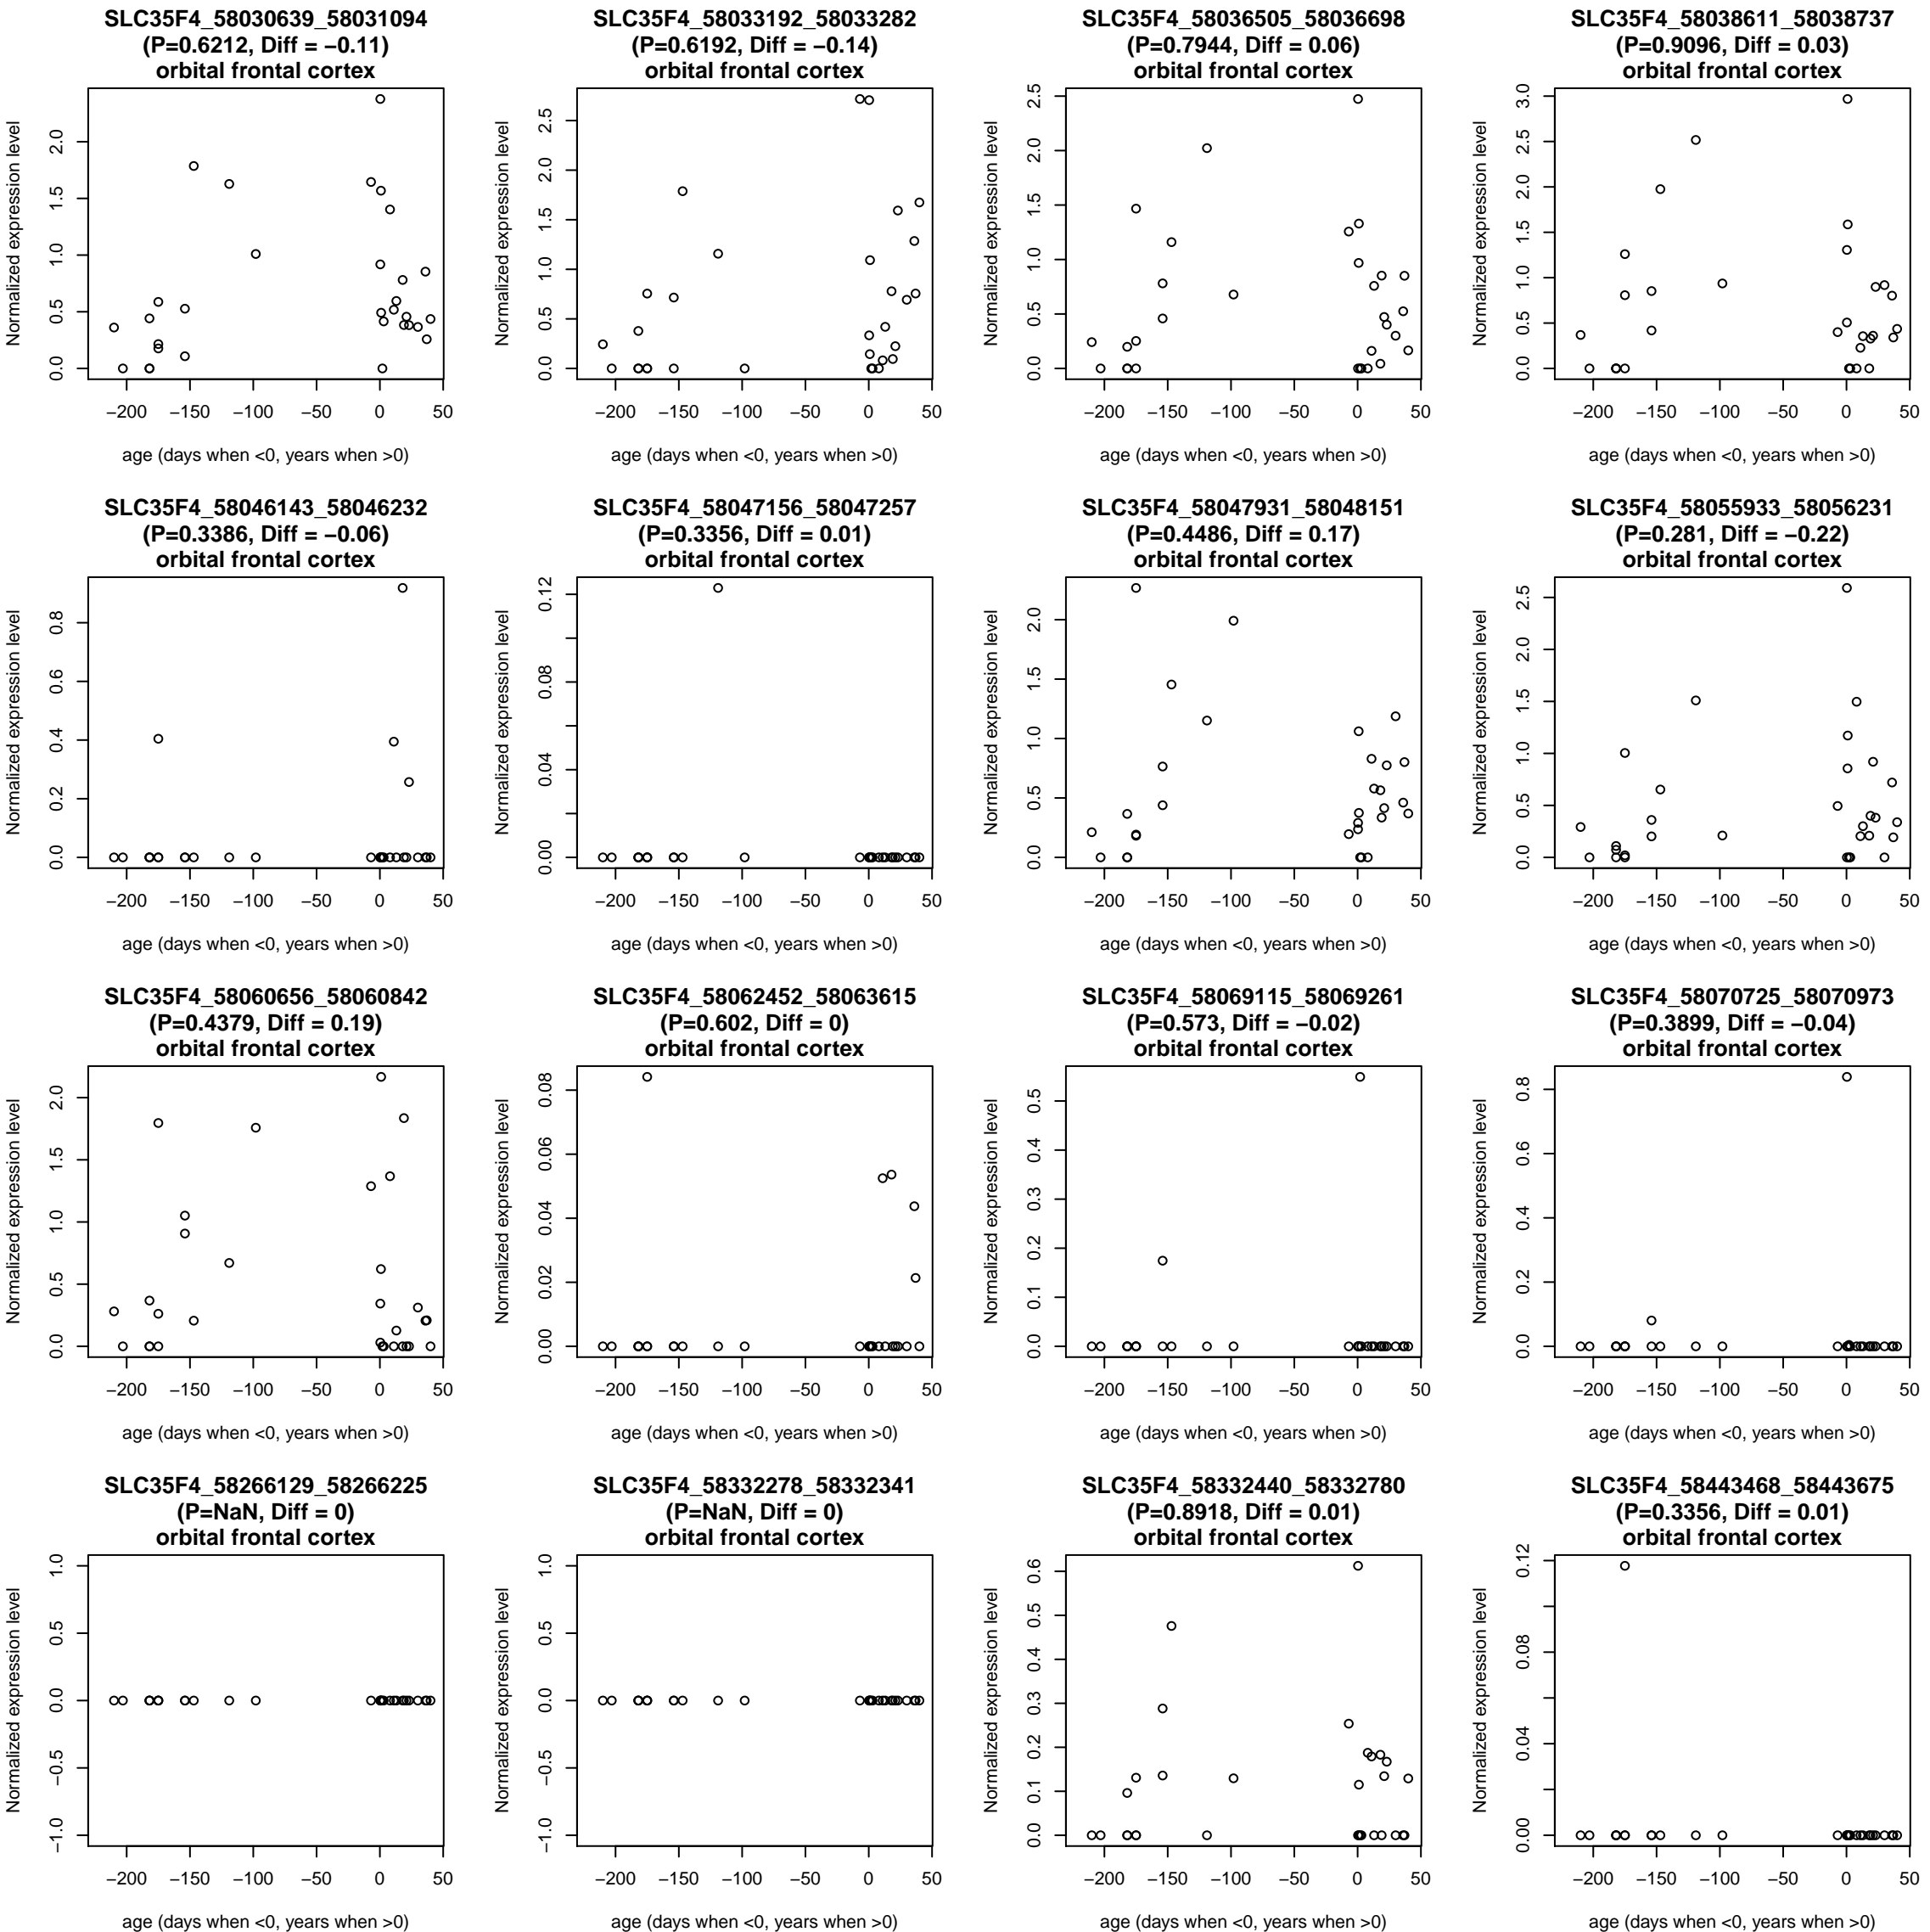

SLC35F4\_58448630\_58448912  
(P=0.6997, Diff = -0.01)  
orbital frontal cortex

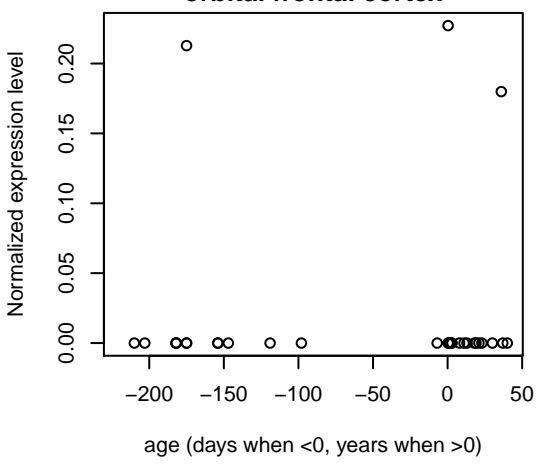

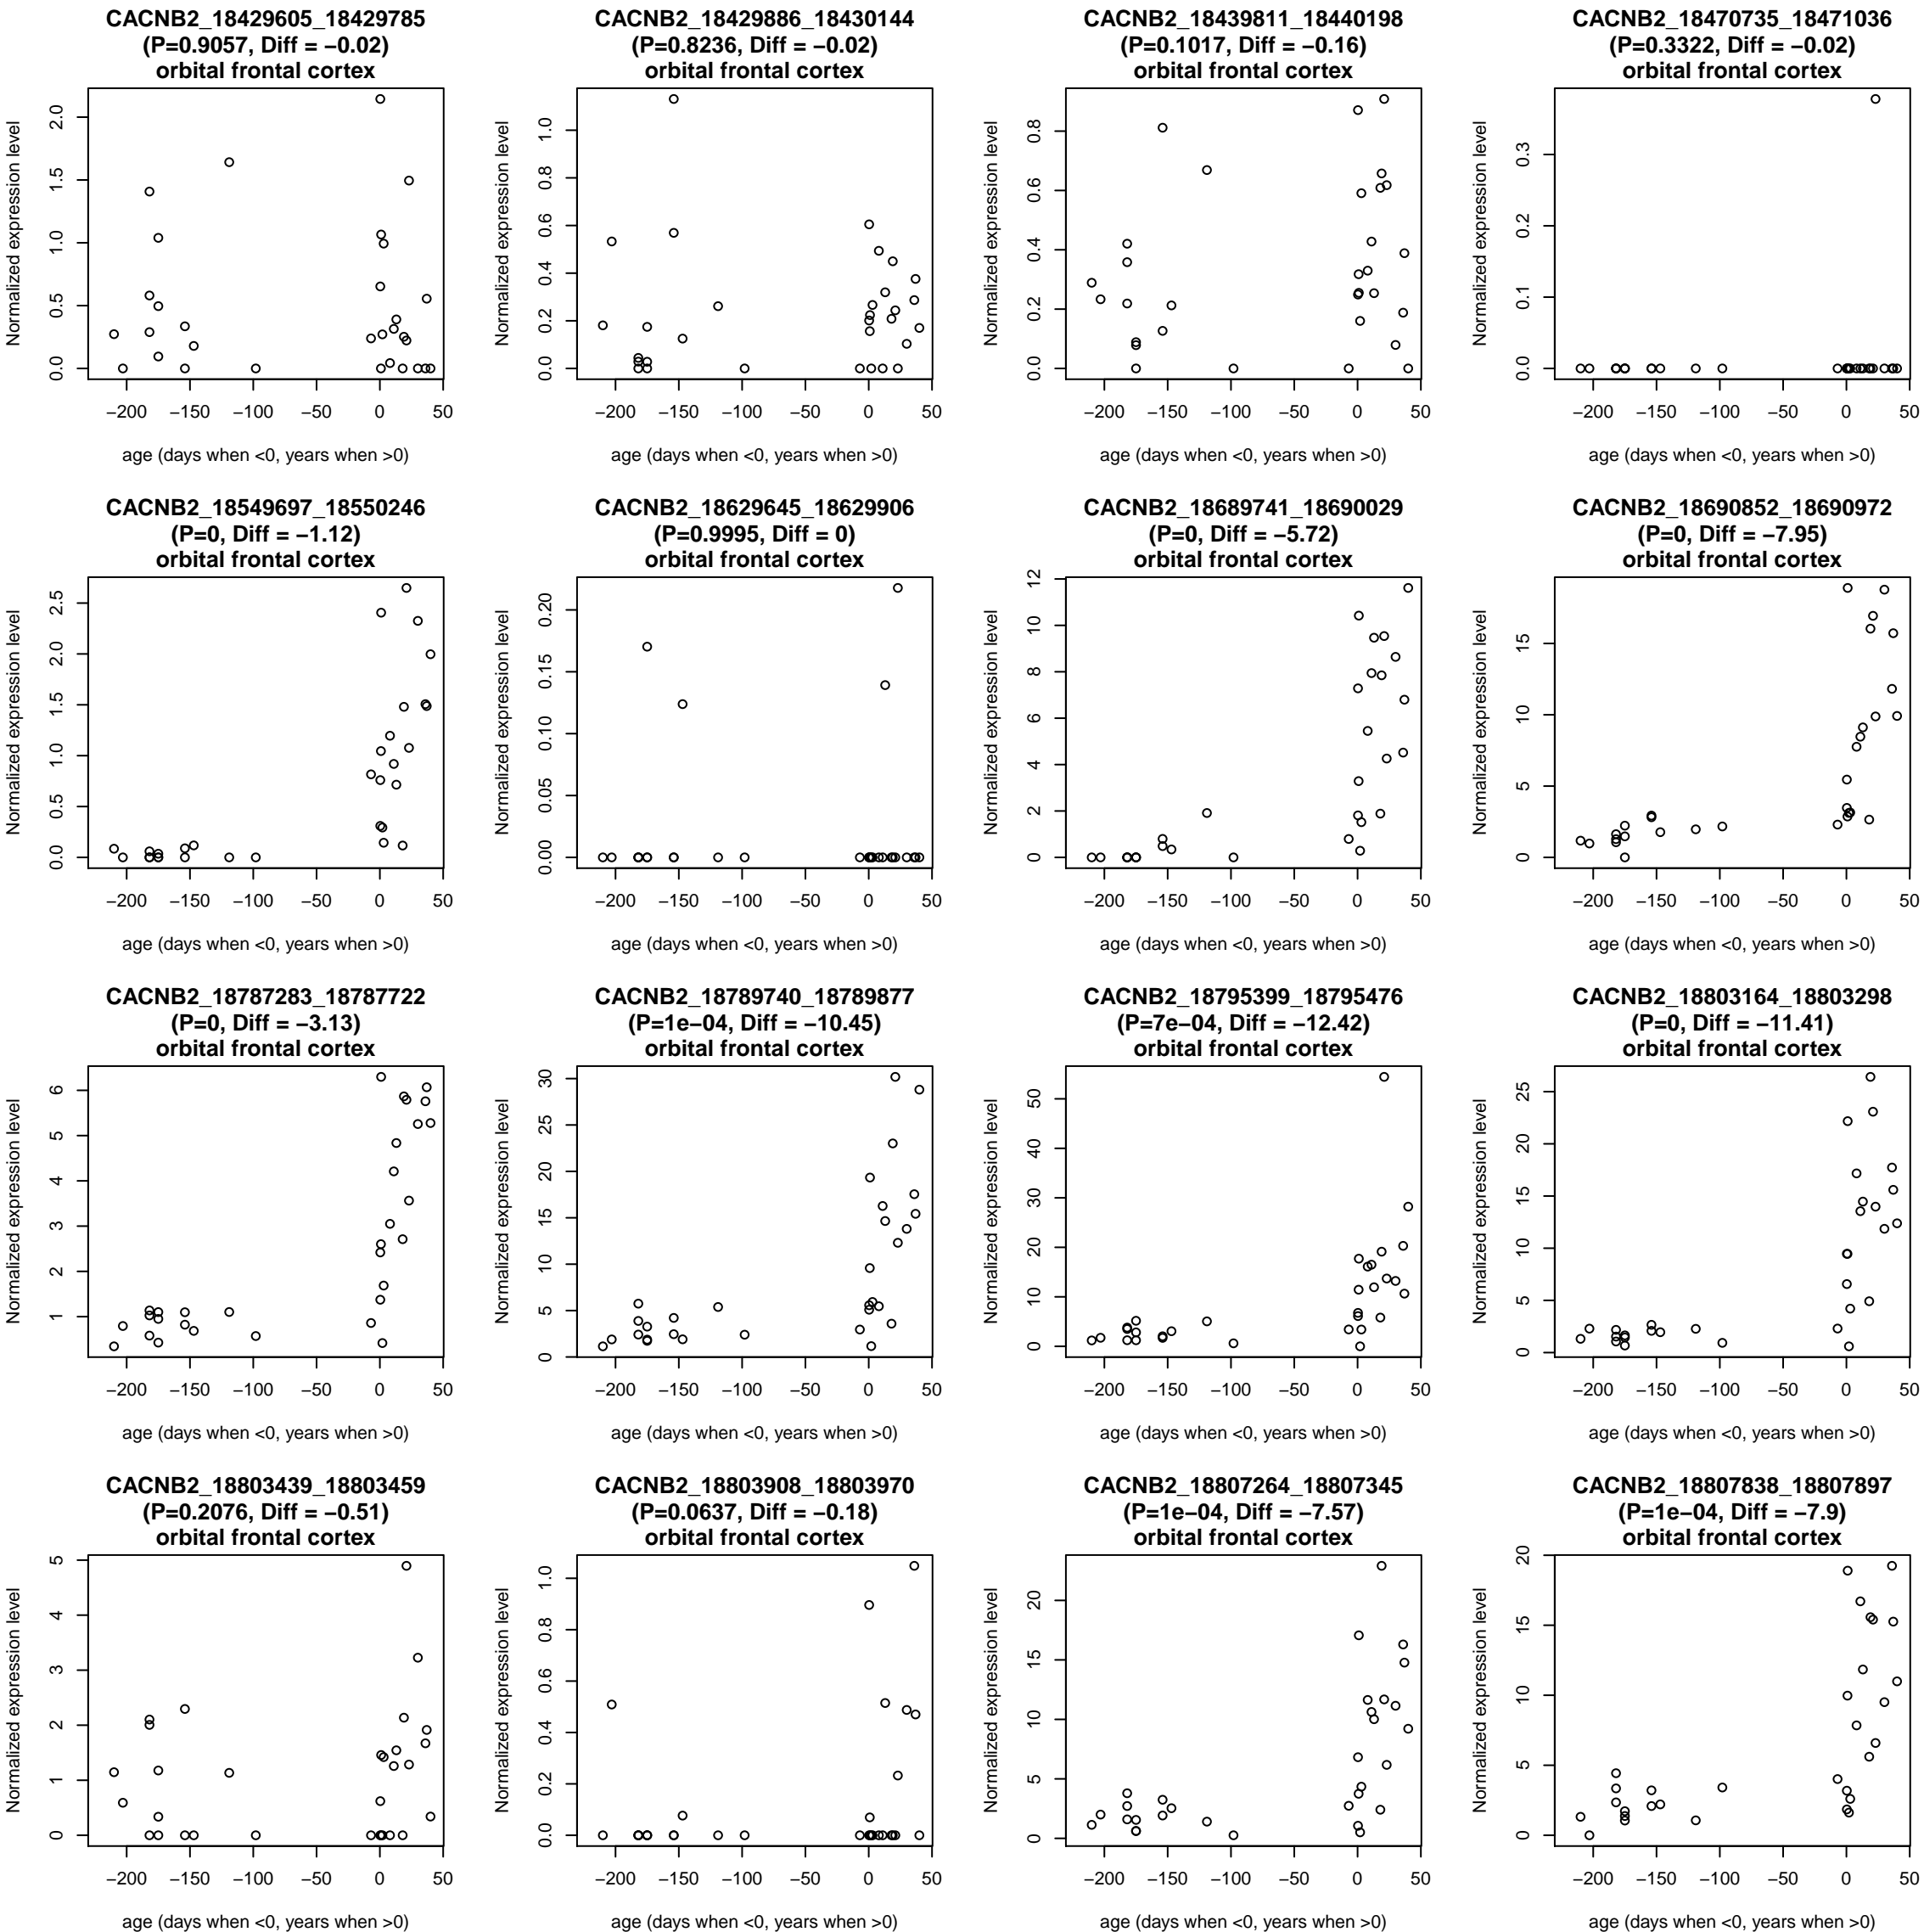

**CACNB2\_18816516\_18816626**  
(P=1e-04, Diff = -11.74)  
orbital frontal cortex

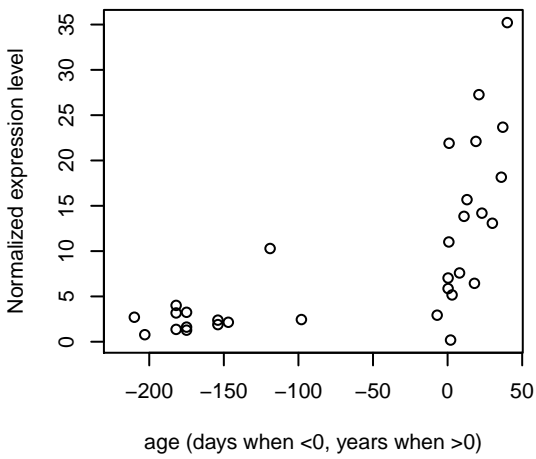

**CACNB2\_18823004\_18823156**  
(P=0, Diff = -8.83)  
orbital frontal cortex

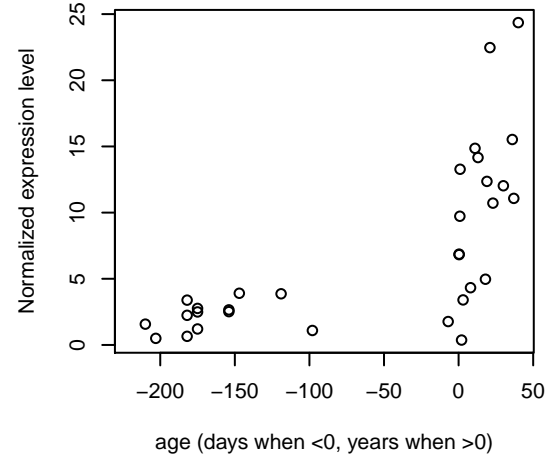

**CACNB2\_18825029\_18825125**  
(P=1e-04, Diff = -11.26)  
orbital frontal cortex

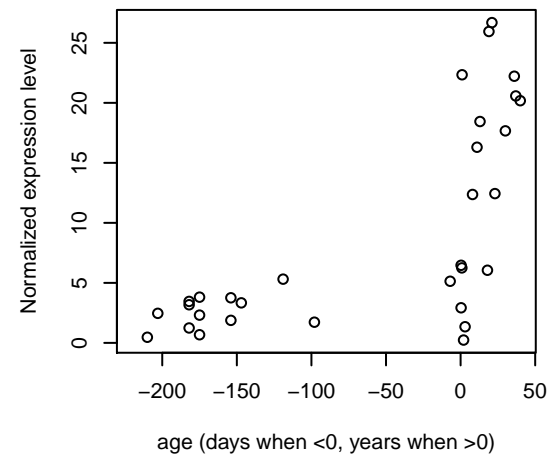

**CACNB2\_18827108\_18827294**  
(P=0, Diff = -13.87)  
orbital frontal cortex

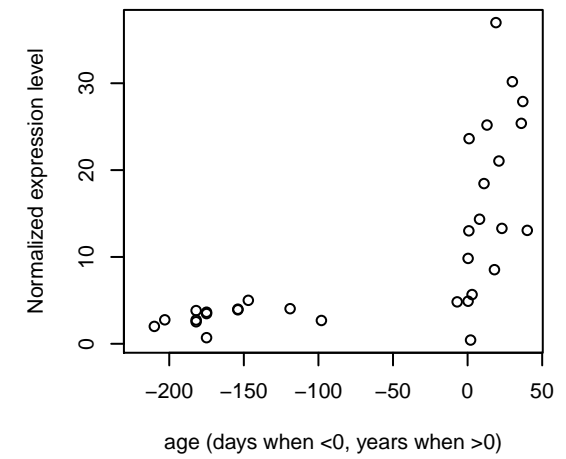

**CACNB2\_18828158\_18830798**  
(P=0, Diff = -10.05)  
orbital frontal cortex

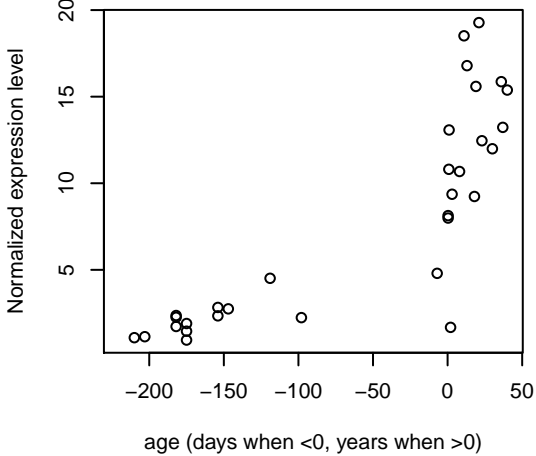



**CTH\_70876900\_70877266**  
(P=0.0639, Diff = 0.71)  
orbital frontal cortex

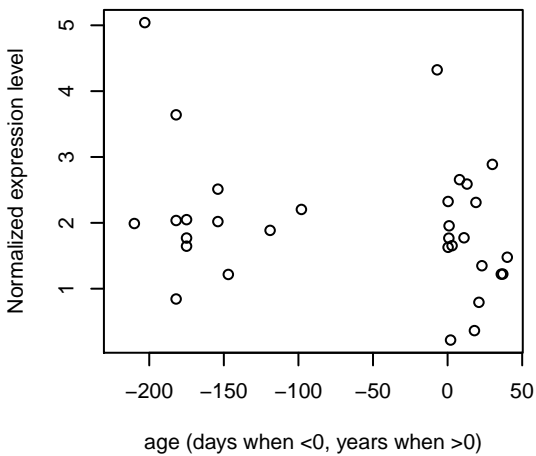

**CTH\_70881638\_70881720**  
(P=0.4144, Diff = 0.4)  
orbital frontal cortex

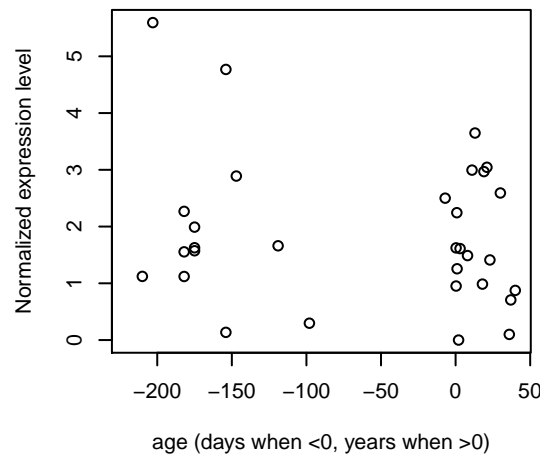

**CTH\_70883619\_70883715**  
(P=0.606, Diff = -0.18)  
orbital frontal cortex

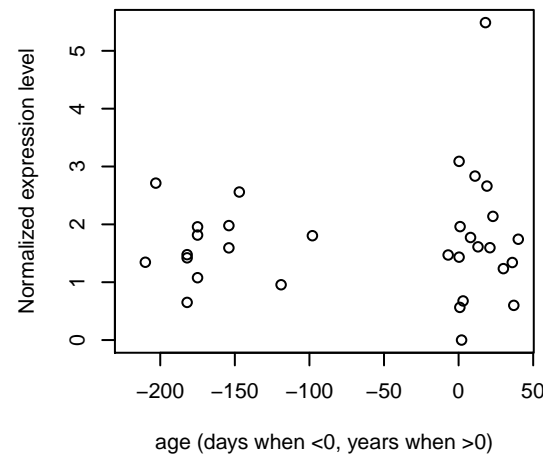

**CTH\_70887248\_70887358**  
(P=0.3884, Diff = 0.5)  
orbital frontal cortex

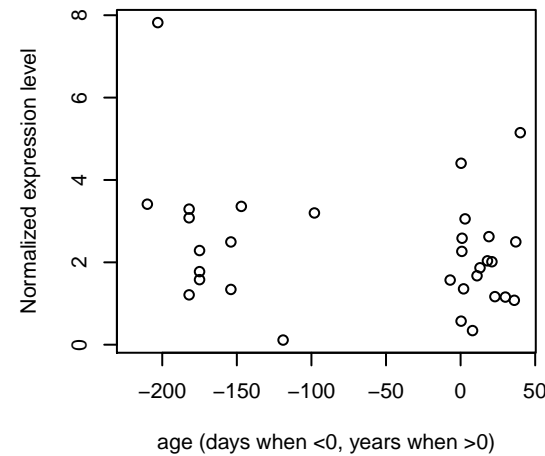

**CTH\_70889967\_70890099**  
(P=0.6516, Diff = -0.19)  
orbital frontal cortex

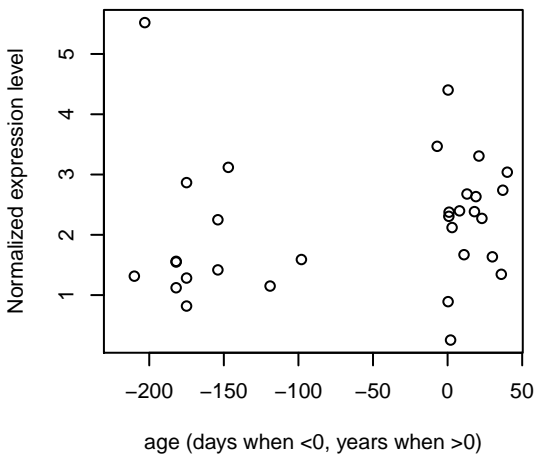

**CTH\_70895476\_70895534**  
(P=0.59, Diff = 0.24)  
orbital frontal cortex

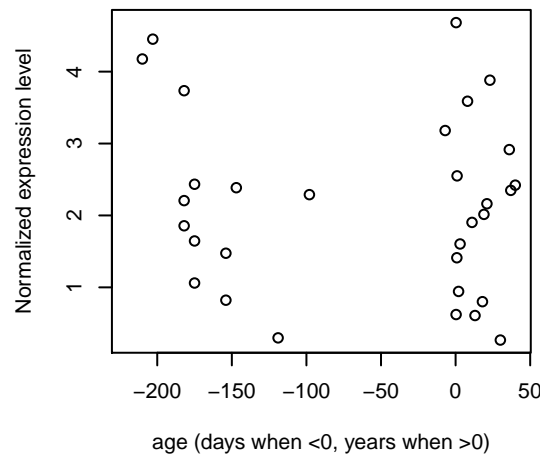

**CTH\_70895999\_70896077**  
(P=0.3076, Diff = 0.58)  
orbital frontal cortex

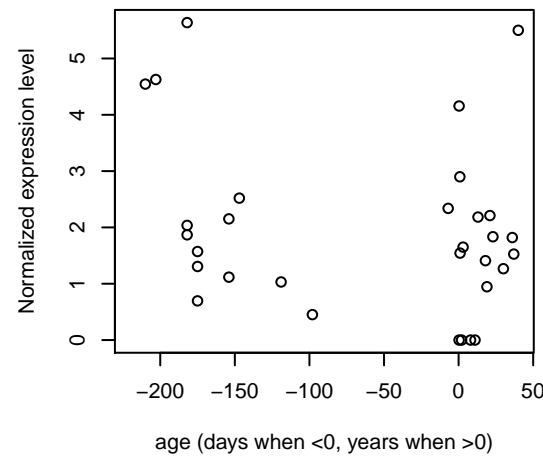

**CTH\_70897765\_70897918**  
(P=0.8912, Diff = 0.06)  
orbital frontal cortex

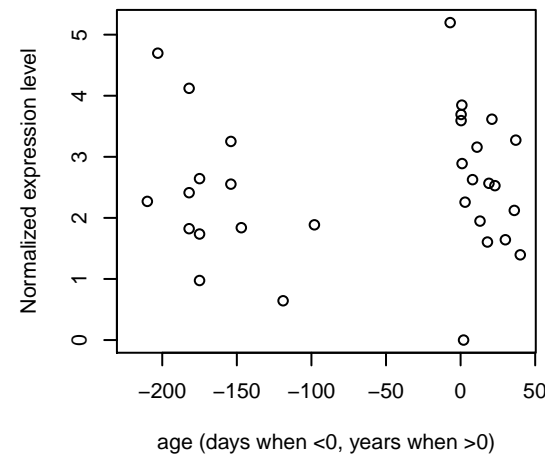

**CTH\_70899510\_70899632**  
(P=0.8747, Diff = 0.09)  
orbital frontal cortex

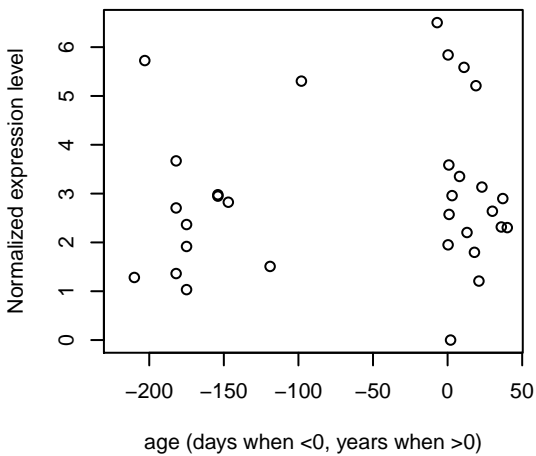

**CTH\_70900533\_70900860**  
(P=0.8891, Diff = -0.02)  
orbital frontal cortex

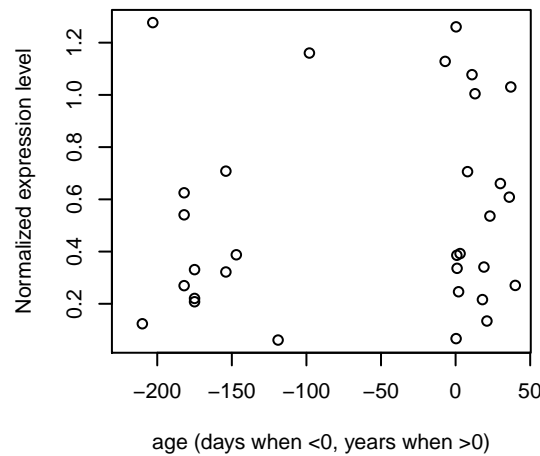

**CTH\_70904370\_70904509**  
(P=0.6825, Diff = -0.3)  
orbital frontal cortex

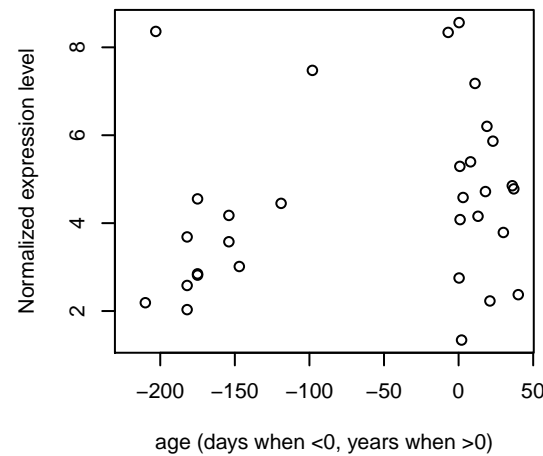

**CTH\_70904783\_70905534**  
(P=0.6387, Diff = -0.1)  
orbital frontal cortex

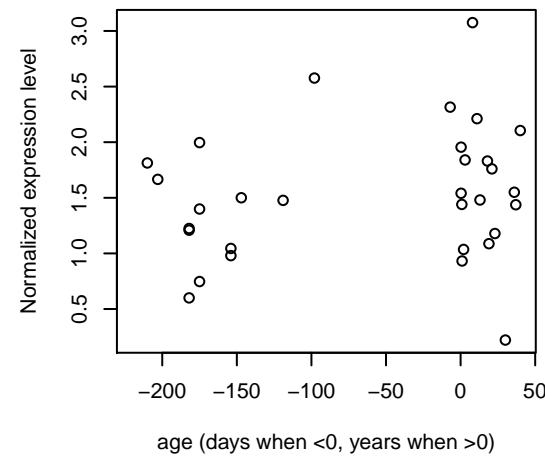

**SEC14L5\_5008317\_5008446**  
( $P=5e-04$ , Diff = -1.49)  
orbital frontal cortex

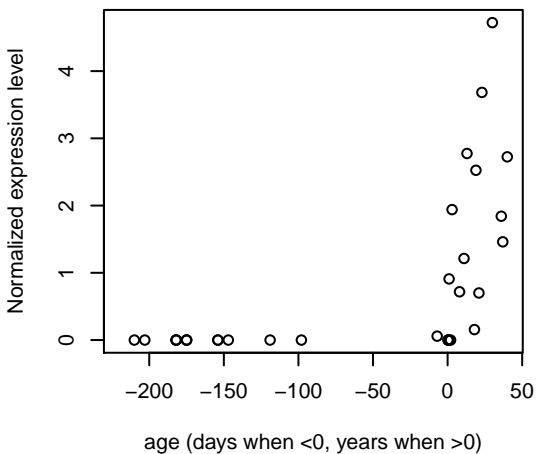

**SEC14L5\_5009273\_5009387**  
( $P=7e-04$ , Diff = -4.08)  
orbital frontal cortex

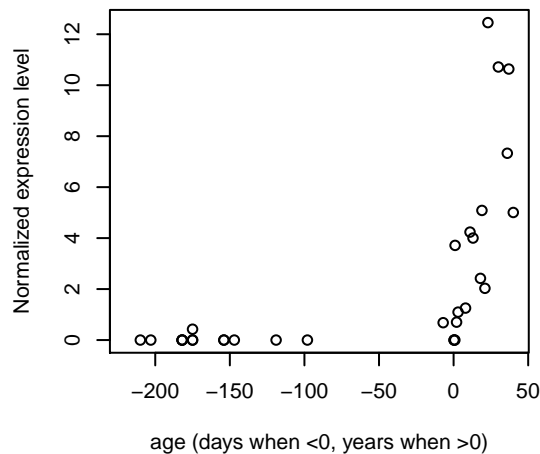

**SEC14L5\_5037557\_5037707**  
( $P=0.0029$ , Diff = -2.23)  
orbital frontal cortex

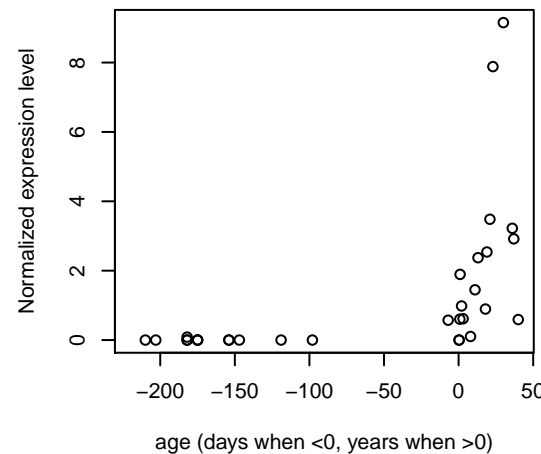

**SEC14L5\_5038149\_5038281**  
( $P=0.0014$ , Diff = -6)  
orbital frontal cortex

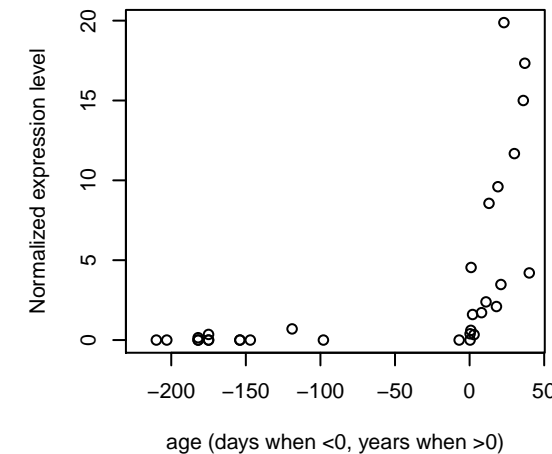

**SEC14L5\_5040767\_5040896**  
( $P=0.0012$ , Diff = -6.72)  
orbital frontal cortex

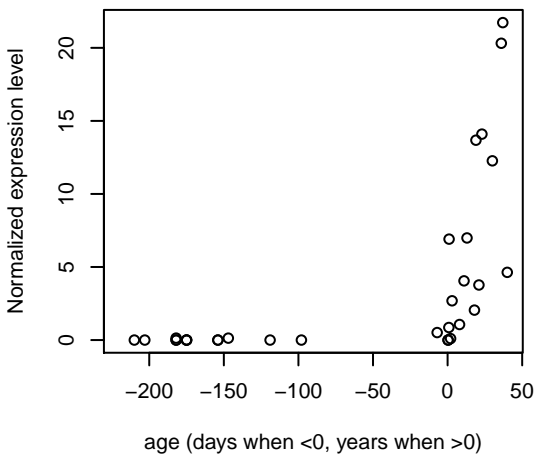

**SEC14L5\_5041838\_5042031**  
( $P=3e-04$ , Diff = -5.73)  
orbital frontal cortex

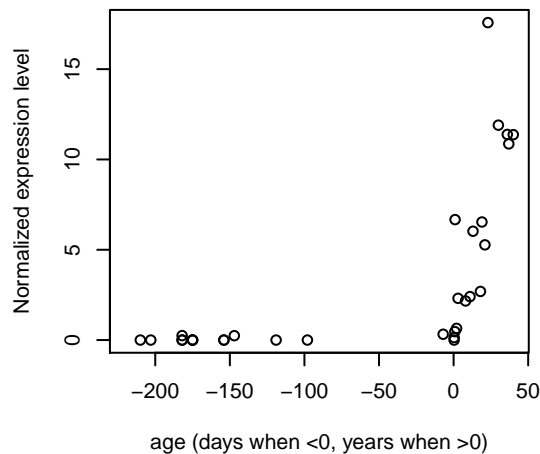

**SEC14L5\_5046348\_5046461**  
( $P=3e-04$ , Diff = -5.73)  
orbital frontal cortex

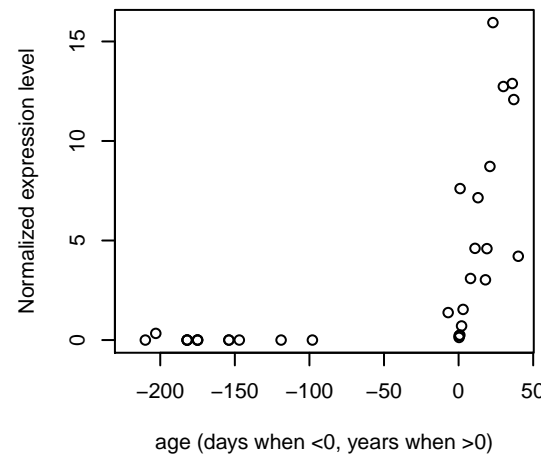

**SEC14L5\_5046855\_5047045**  
( $P=3e-04$ , Diff = -6.21)  
orbital frontal cortex

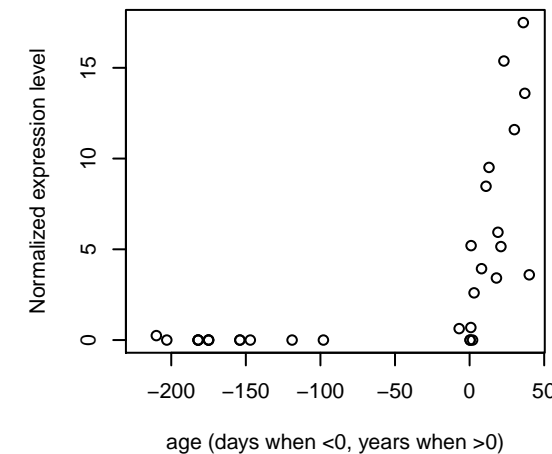

**SEC14L5\_5050655\_5050744**  
( $P=1e-04$ , Diff = -4.96)  
orbital frontal cortex

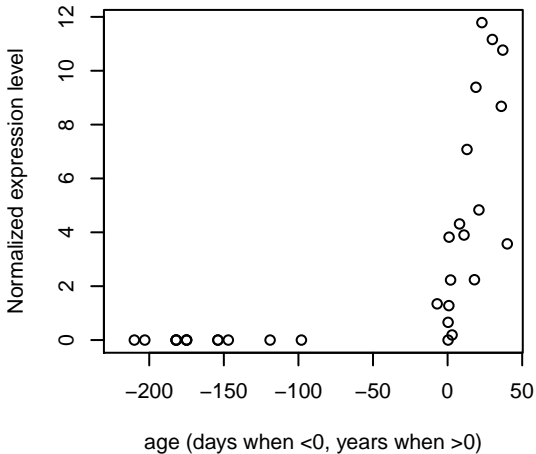

**SEC14L5\_5050855\_5050926**  
( $P=1e-04$ , Diff = -5.37)  
orbital frontal cortex

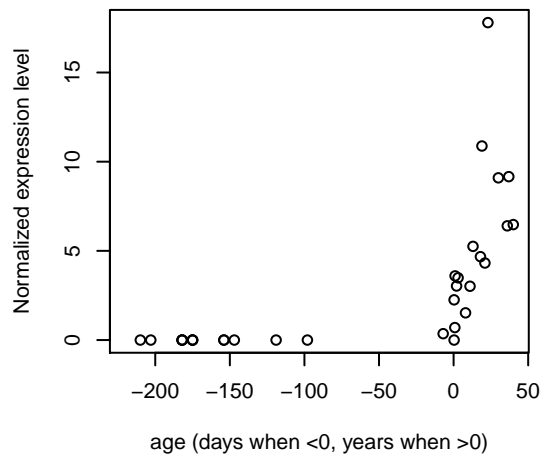

**SEC14L5\_5053402\_5053574**  
( $P=3e-04$ , Diff = -4.61)  
orbital frontal cortex

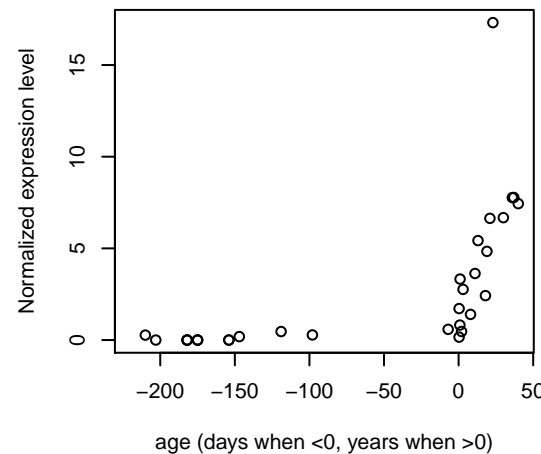

**SEC14L5\_5055914\_5056049**  
( $P=2e-04$ , Diff = -7.21)  
orbital frontal cortex

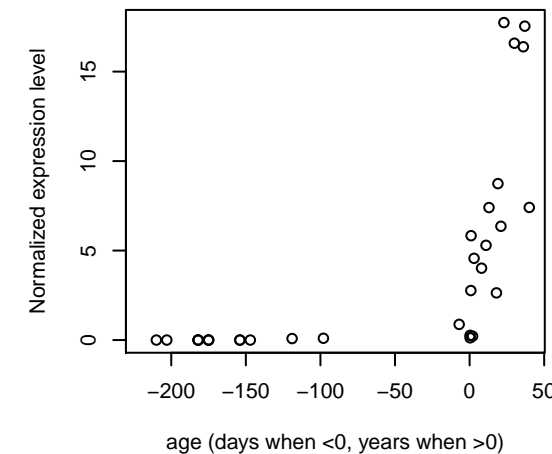

**SEC14L5\_5057352\_5057487**  
( $P=2e-04$ , Diff = -6.45)  
orbital frontal cortex

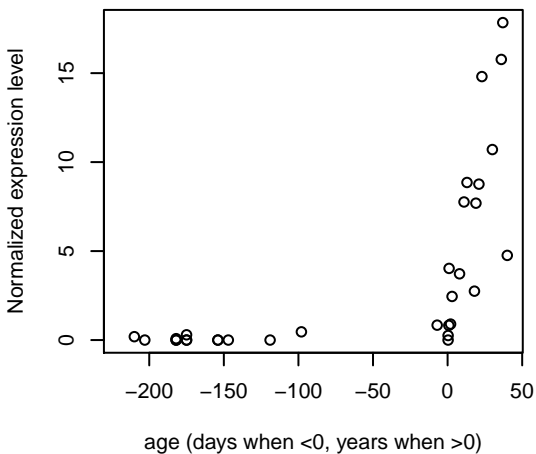

**SEC14L5\_5058421\_5058649**  
( $P=2e-04$ , Diff = -4.14)  
orbital frontal cortex

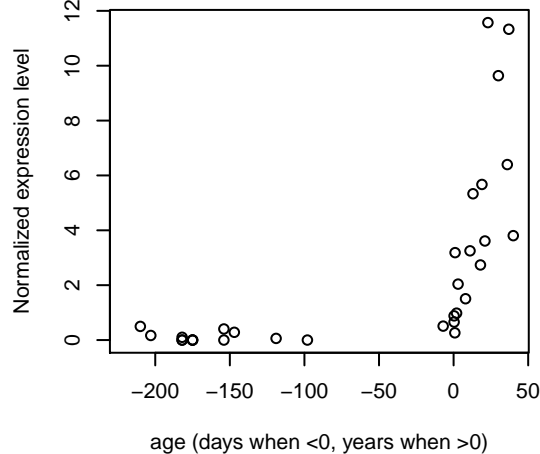

**SEC14L5\_5061095\_5061274**  
( $P=1e-04$ , Diff = -5.26)  
orbital frontal cortex

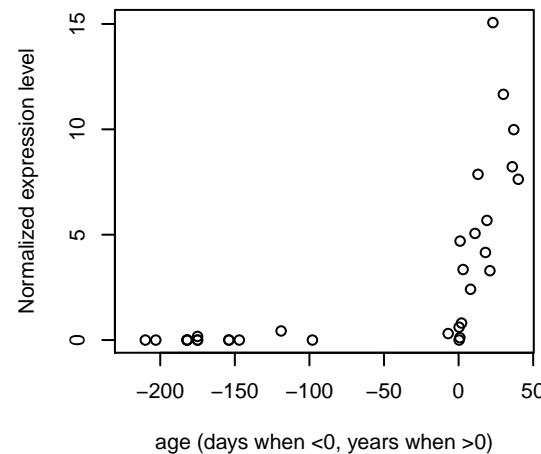

**SEC14L5\_5064859\_5069156**  
( $P=1e-04$ , Diff = -10.42)  
orbital frontal cortex

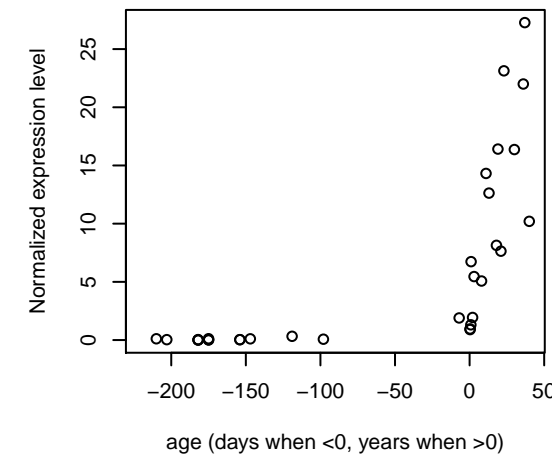

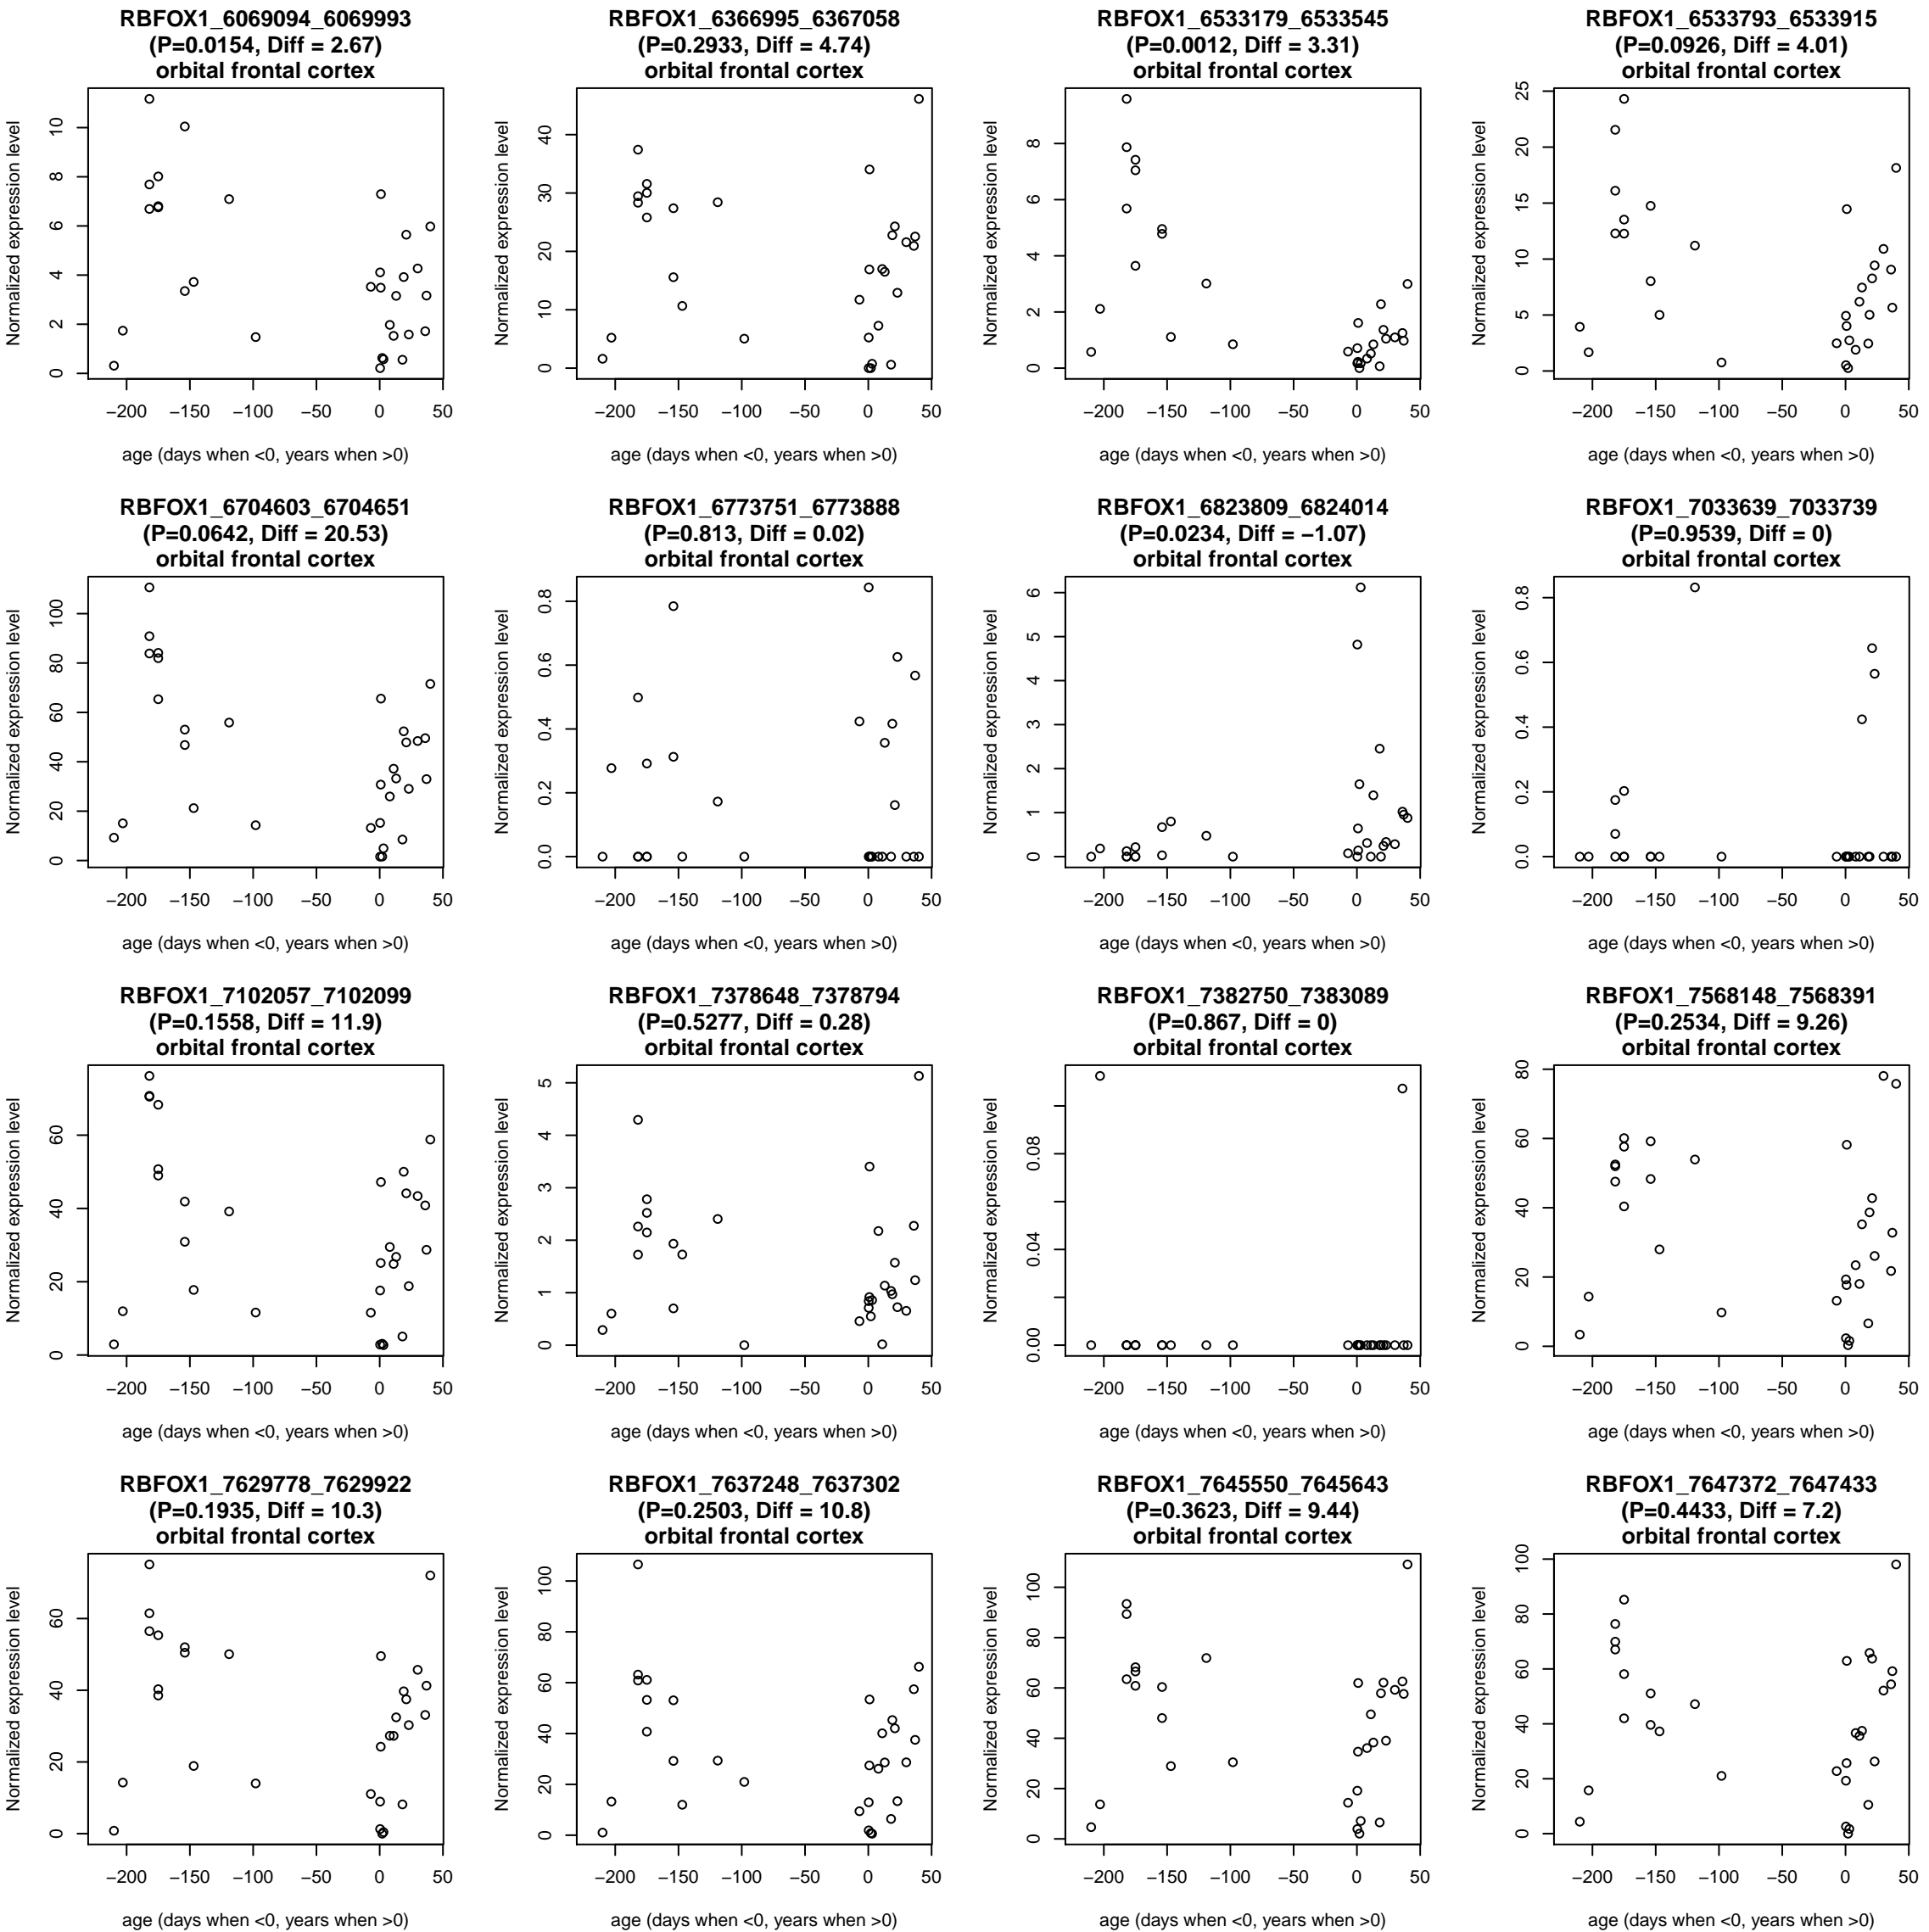

**RBFOX1\_7657286\_7657340**  
(P=0.8348, Diff = 2.1)  
orbital frontal cortex

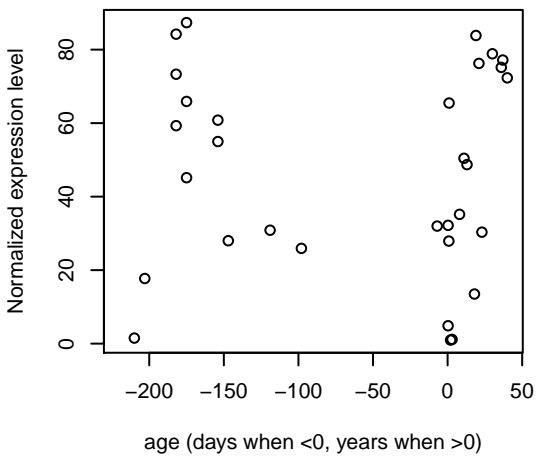

**RBFOX1\_7680604\_7680685**  
(P=0.8065, Diff = -2.42)  
orbital frontal cortex

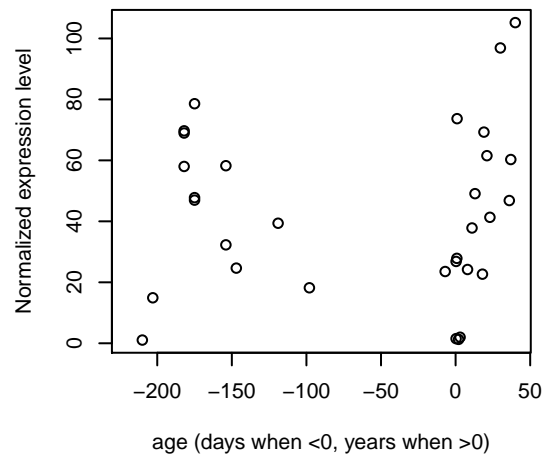

**RBFOX1\_7703816\_7703949**  
(P=0.5455, Diff = 2.93)  
orbital frontal cortex

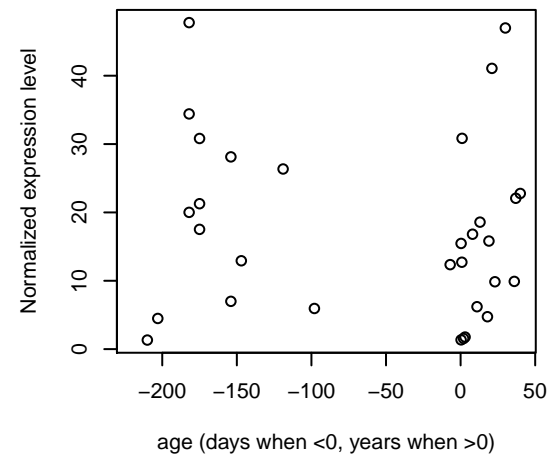

**RBFOX1\_7714930\_7714970**  
(P=0.7394, Diff = -2.07)  
orbital frontal cortex

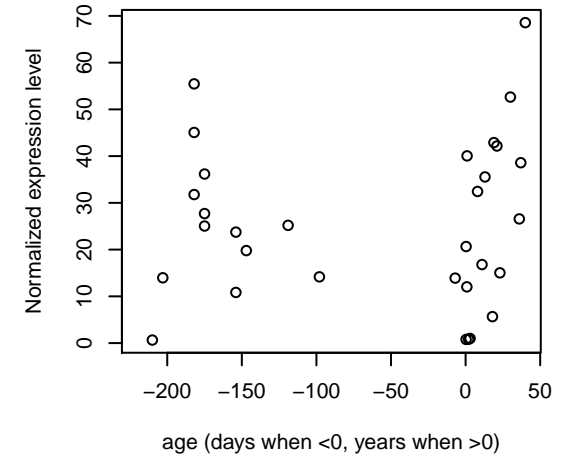

**RBFOX1\_7721558\_7721601**  
(P=0.2026, Diff = 0.26)  
orbital frontal cortex

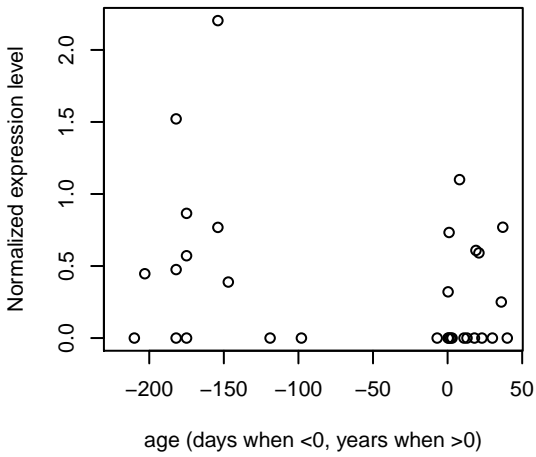

**RBFOX1\_7726775\_7726840**  
(P=0.7549, Diff = 2.87)  
orbital frontal cortex

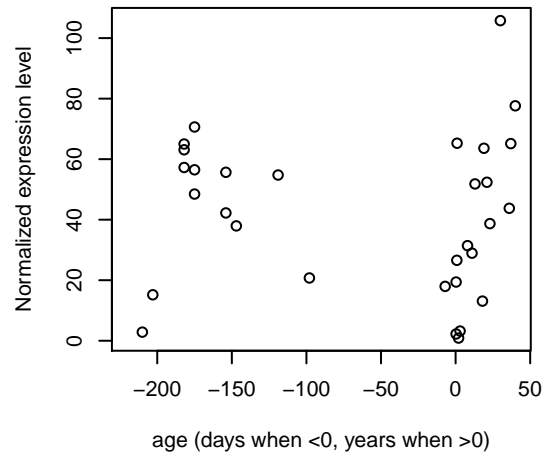

**RBFOX1\_7743316\_7743369**  
(P=0.9631, Diff = -0.23)  
orbital frontal cortex

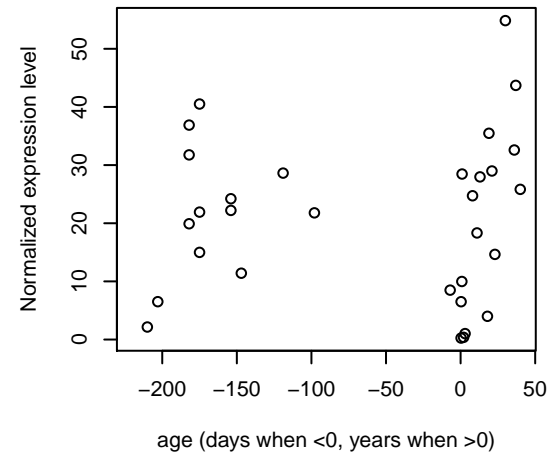

**RBFOX1\_7759057\_7759133**  
(P=0.7342, Diff = 4.08)  
orbital frontal cortex

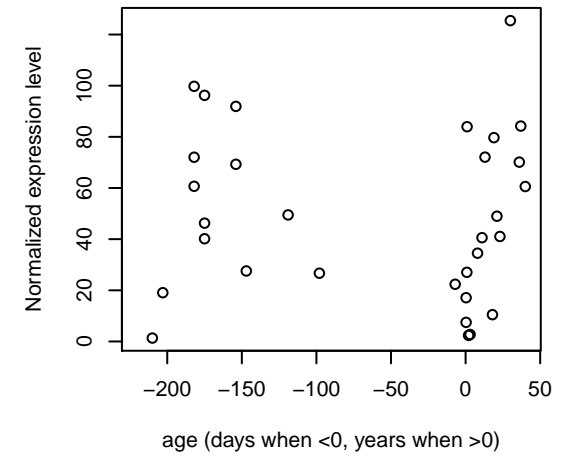

**RBFOX1\_7759495\_7763340**  
(P=0.9711, Diff = 0.24)  
orbital frontal cortex

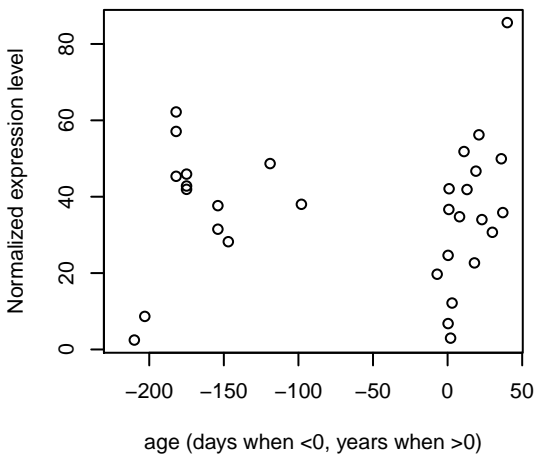

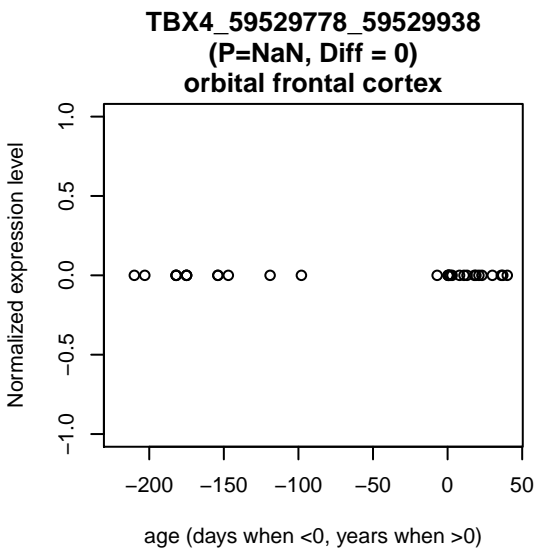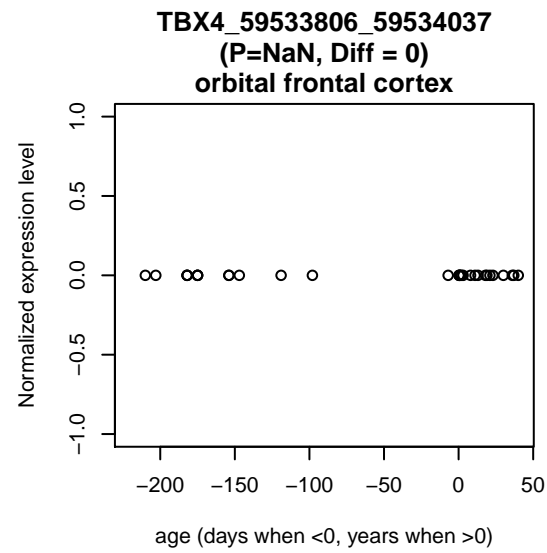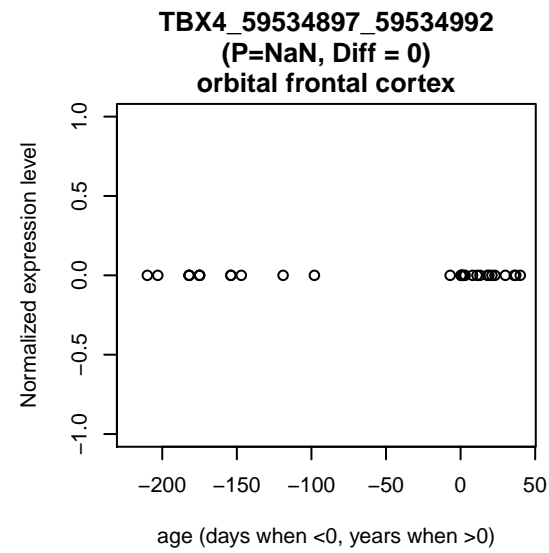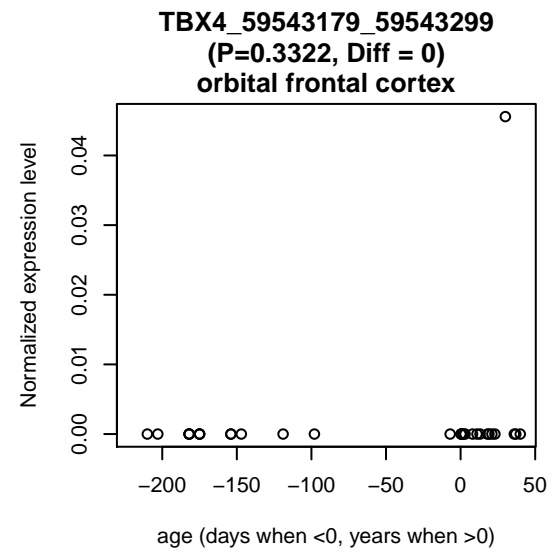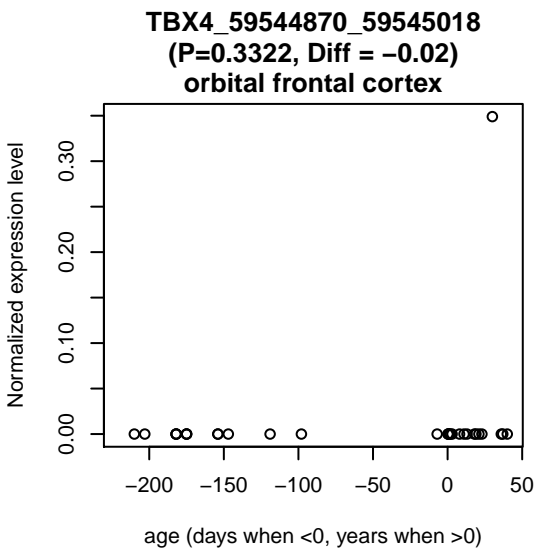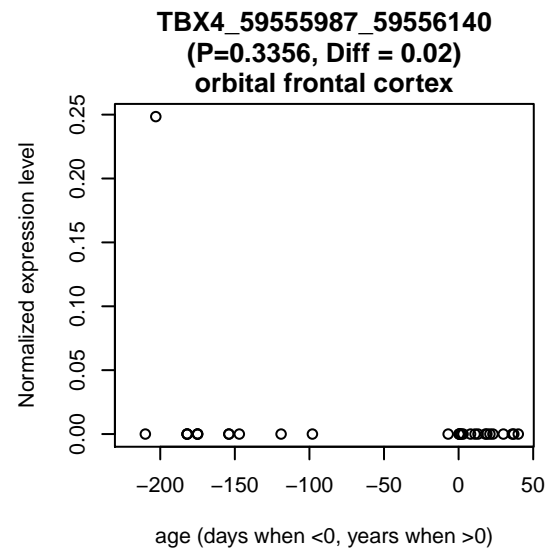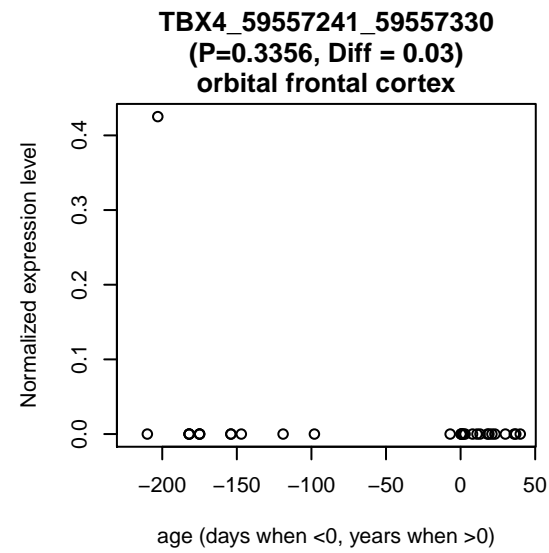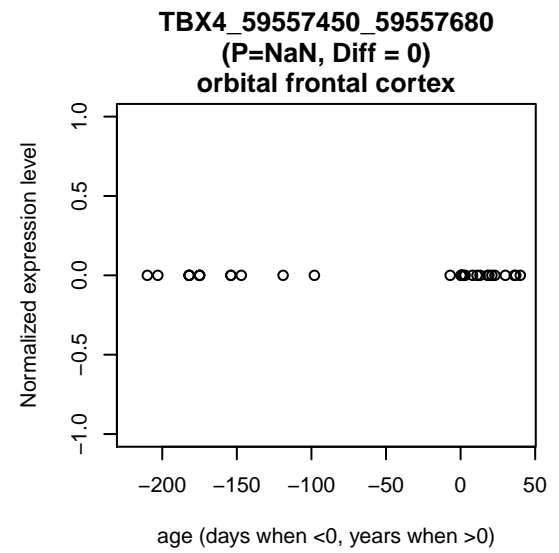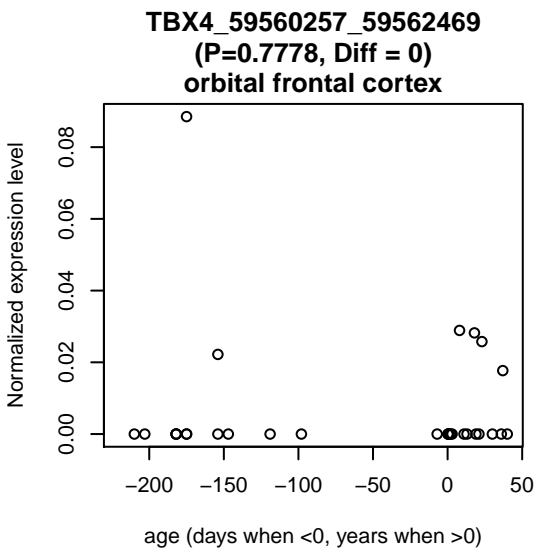

**FRG1\_190861942\_190862226**  
( $P=2e-04$ , Diff = 9.35)  
orbital frontal cortex

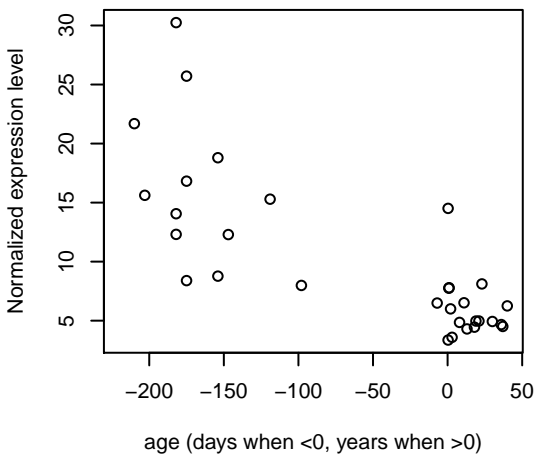

**FRG1\_190862987\_190863159**  
( $P=0.0174$ , Diff = 0.06)  
orbital frontal cortex

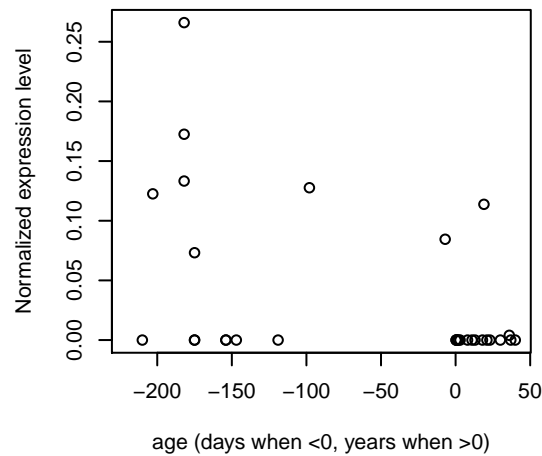

**FRG1\_190864356\_190864427**  
( $P=0.0011$ , Diff = 10.52)  
orbital frontal cortex

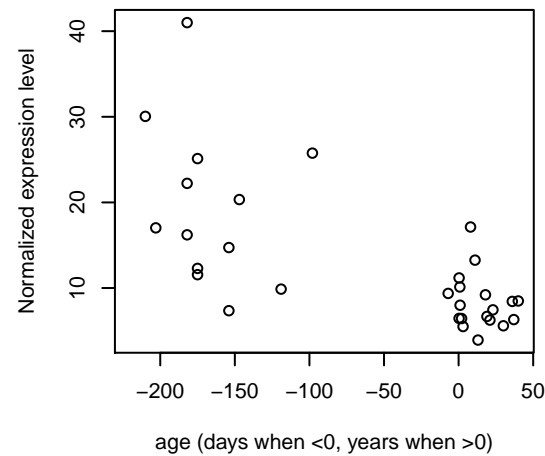

**FRG1\_190873316\_190873442**  
( $P=3e-04$ , Diff = 22.73)  
orbital frontal cortex

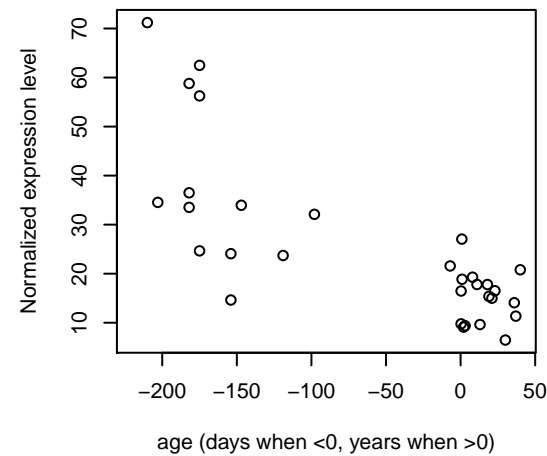

**FRG1\_190874222\_190874280**  
( $P=1e-04$ , Diff = 11.04)  
orbital frontal cortex

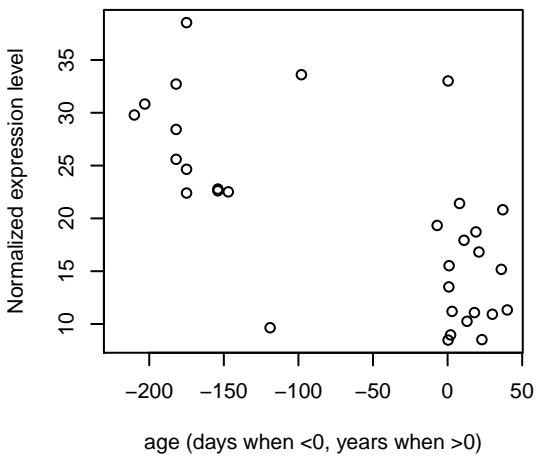

**FRG1\_190876191\_190876306**  
( $P=3e-04$ , Diff = 16.94)  
orbital frontal cortex

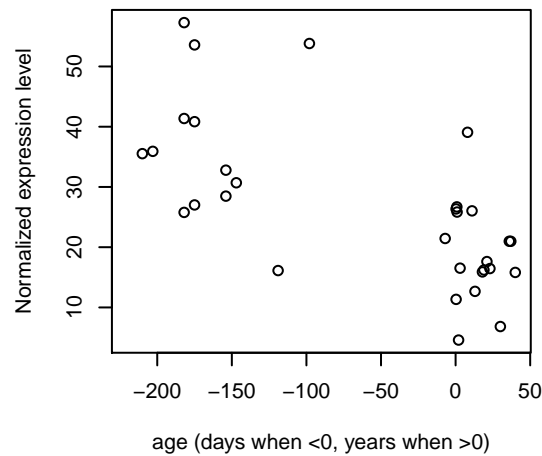

**FRG1\_190878552\_190878657**  
( $P=0.0029$ , Diff = 4.97)  
orbital frontal cortex

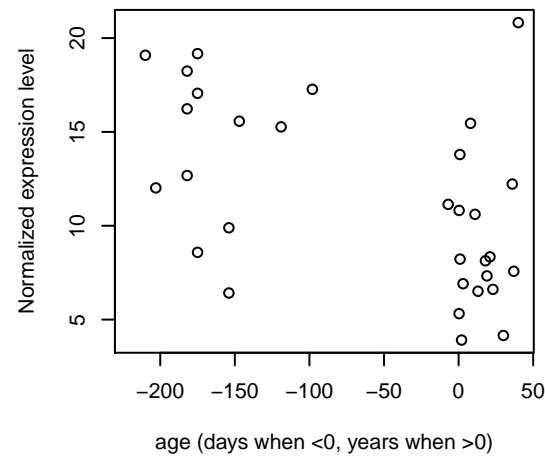

**FRG1\_190881902\_190881994**  
( $P=0.0202$ , Diff = 4.27)  
orbital frontal cortex

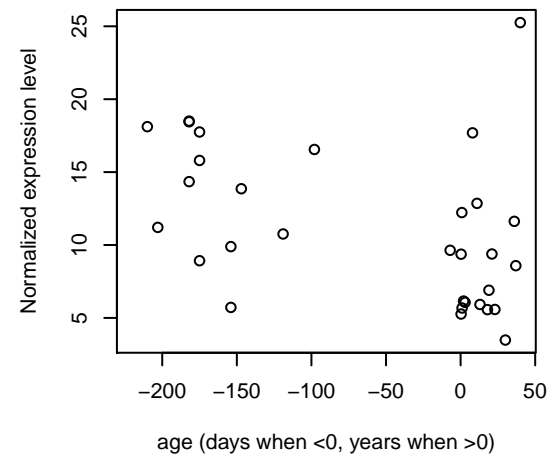

**FRG1\_190882016\_190882355**  
( $P=0.0216$ , Diff = 0.39)  
orbital frontal cortex

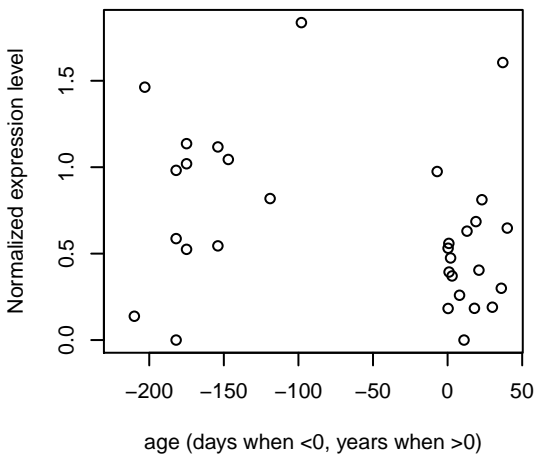

**FRG1\_190882583\_190882705**  
( $P=0.8413$ , Diff = 0.02)  
orbital frontal cortex

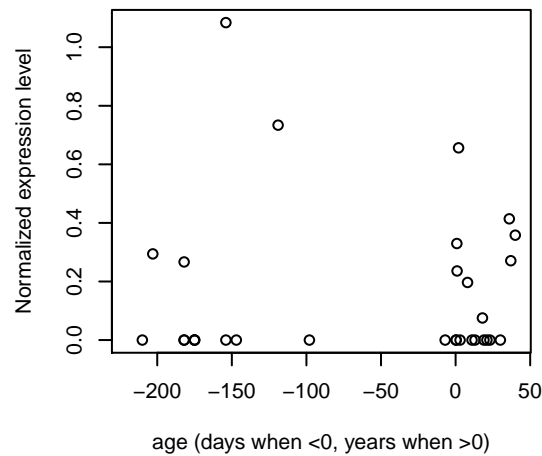

**FRG1\_190882976\_190883087**  
( $P=0.0076$ , Diff = 14.64)  
orbital frontal cortex

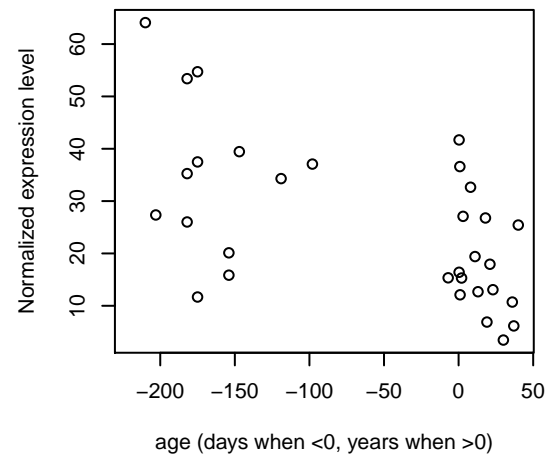

**FRG1\_190884247\_190884359**  
( $P=0.0062$ , Diff = 8.67)  
orbital frontal cortex

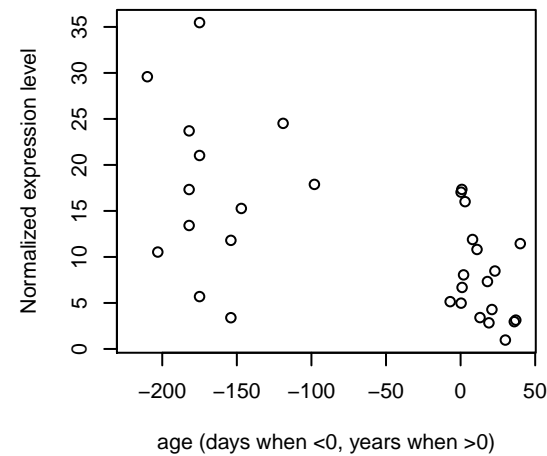

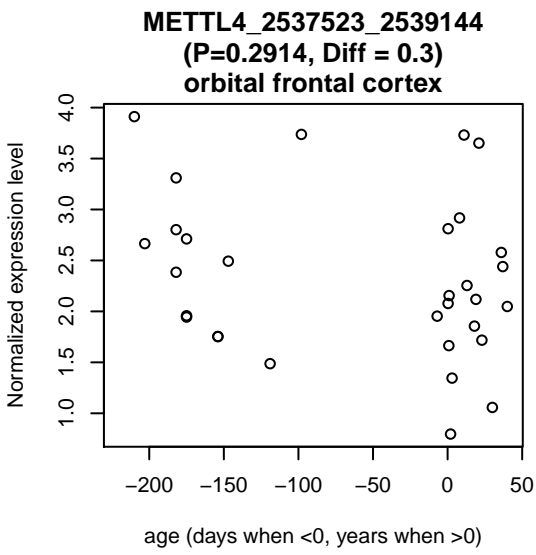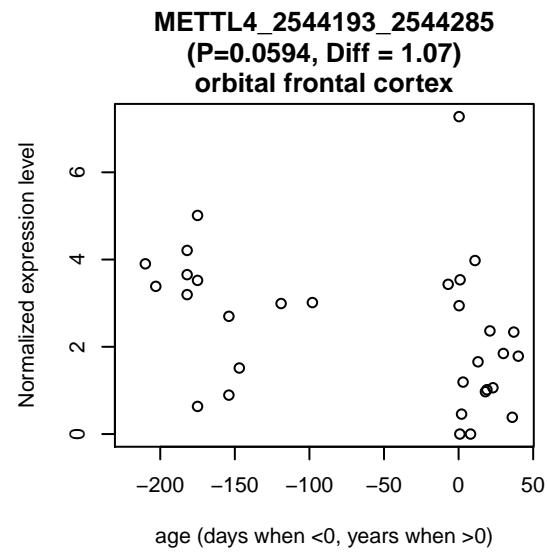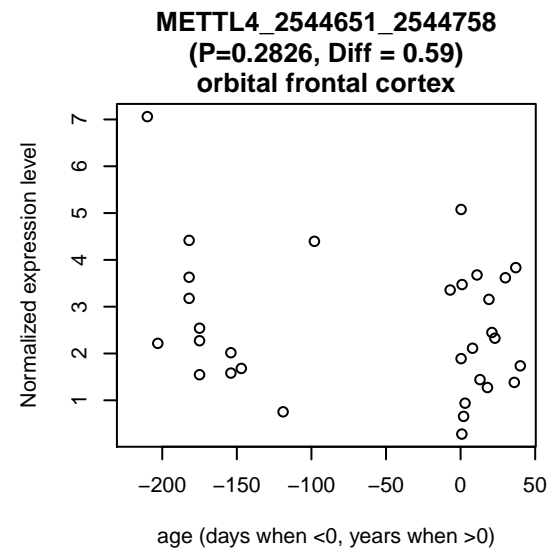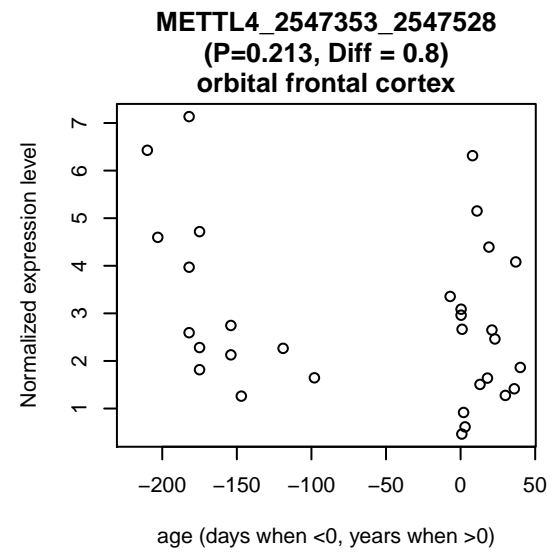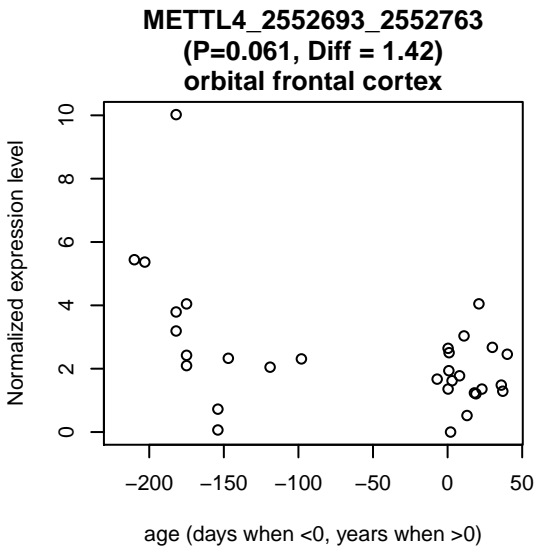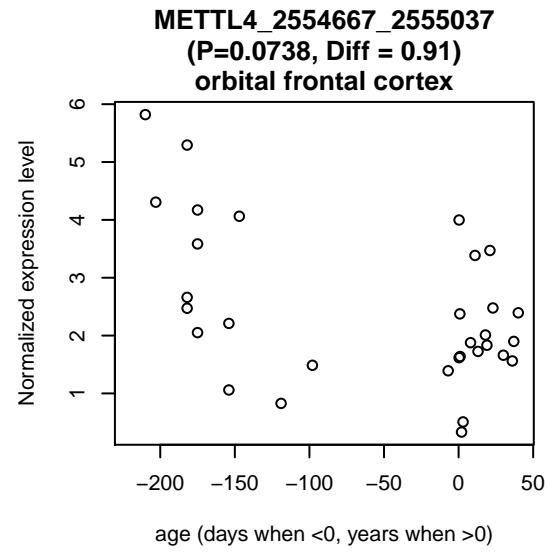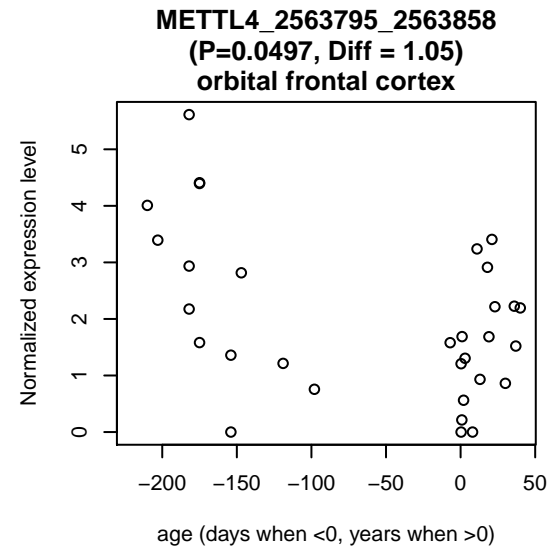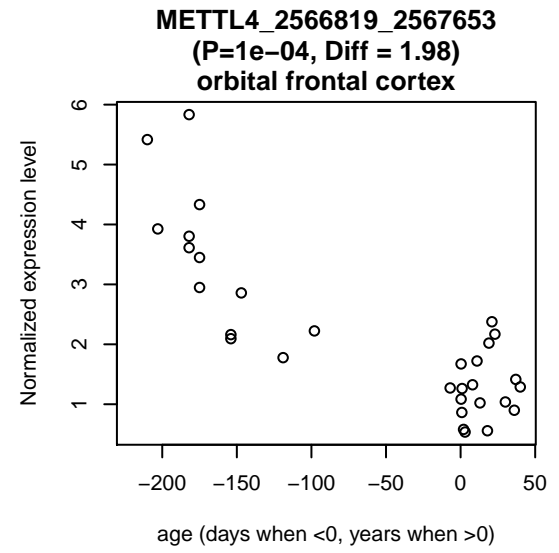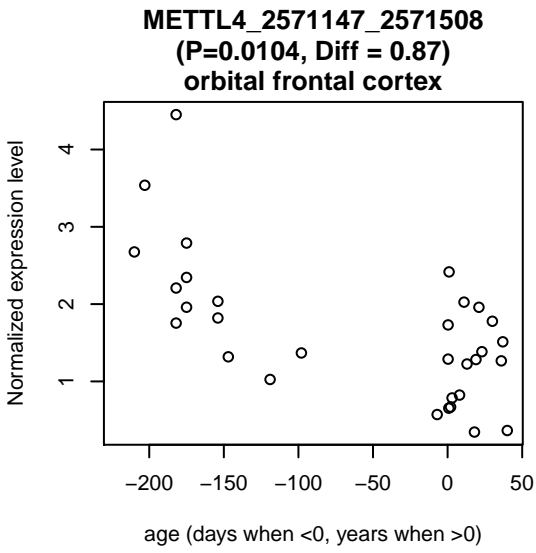

**C7orf11\_40172341\_40172858**  
(P=0.0013, Diff = 9.32)  
orbital frontal cortex

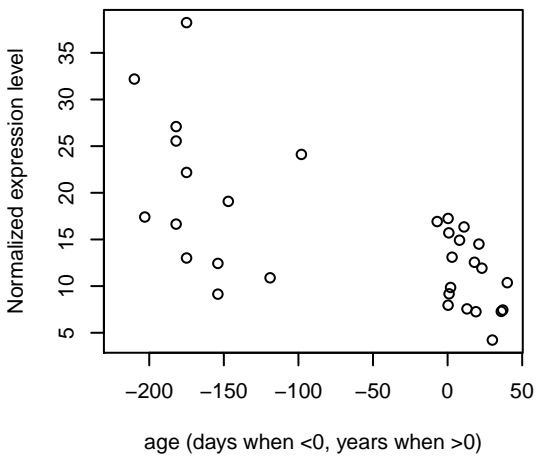

**C7orf11\_40173827\_40174258**  
(P=0.0067, Diff = 7.82)  
orbital frontal cortex

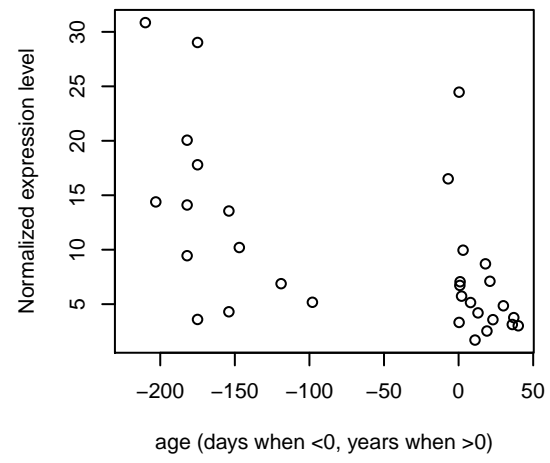



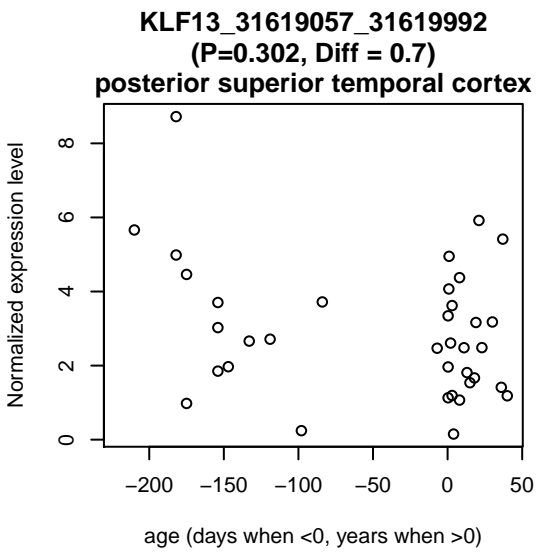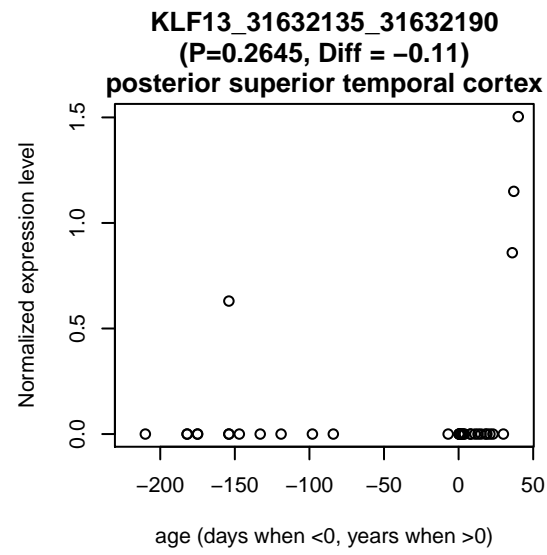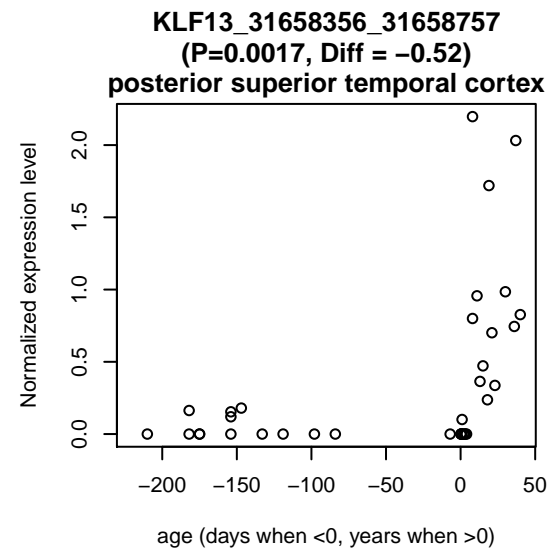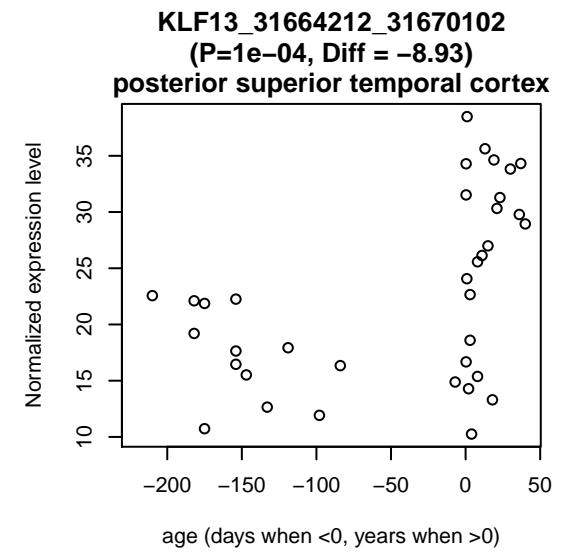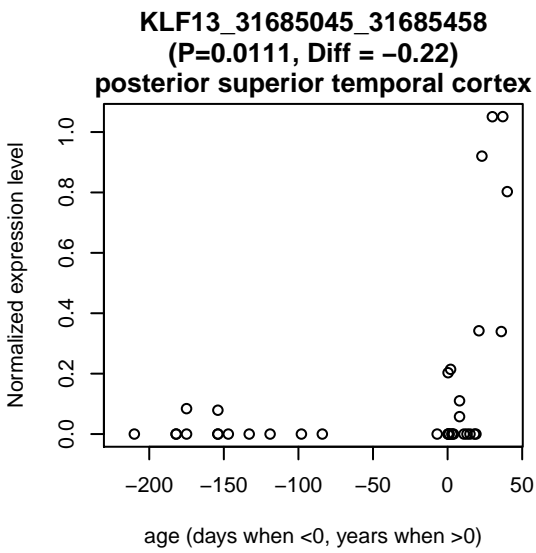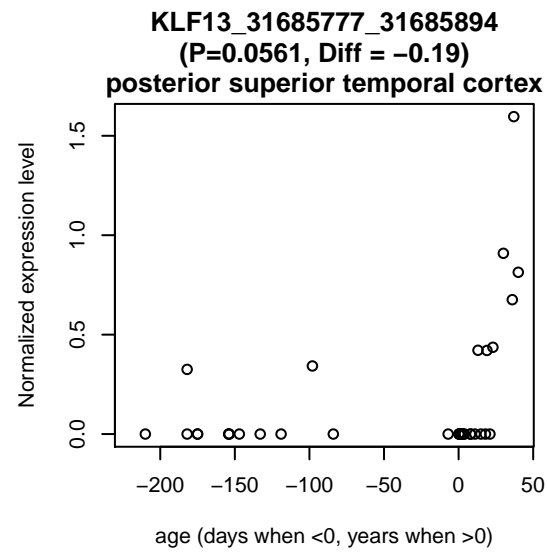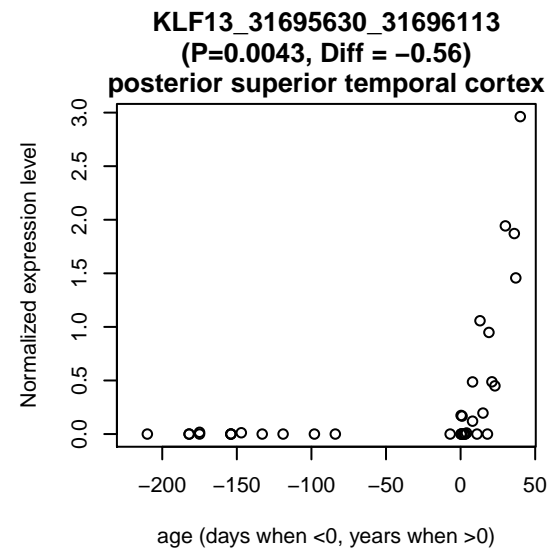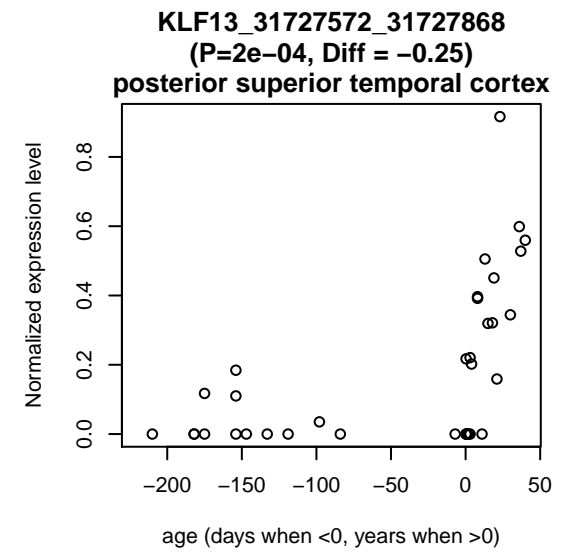

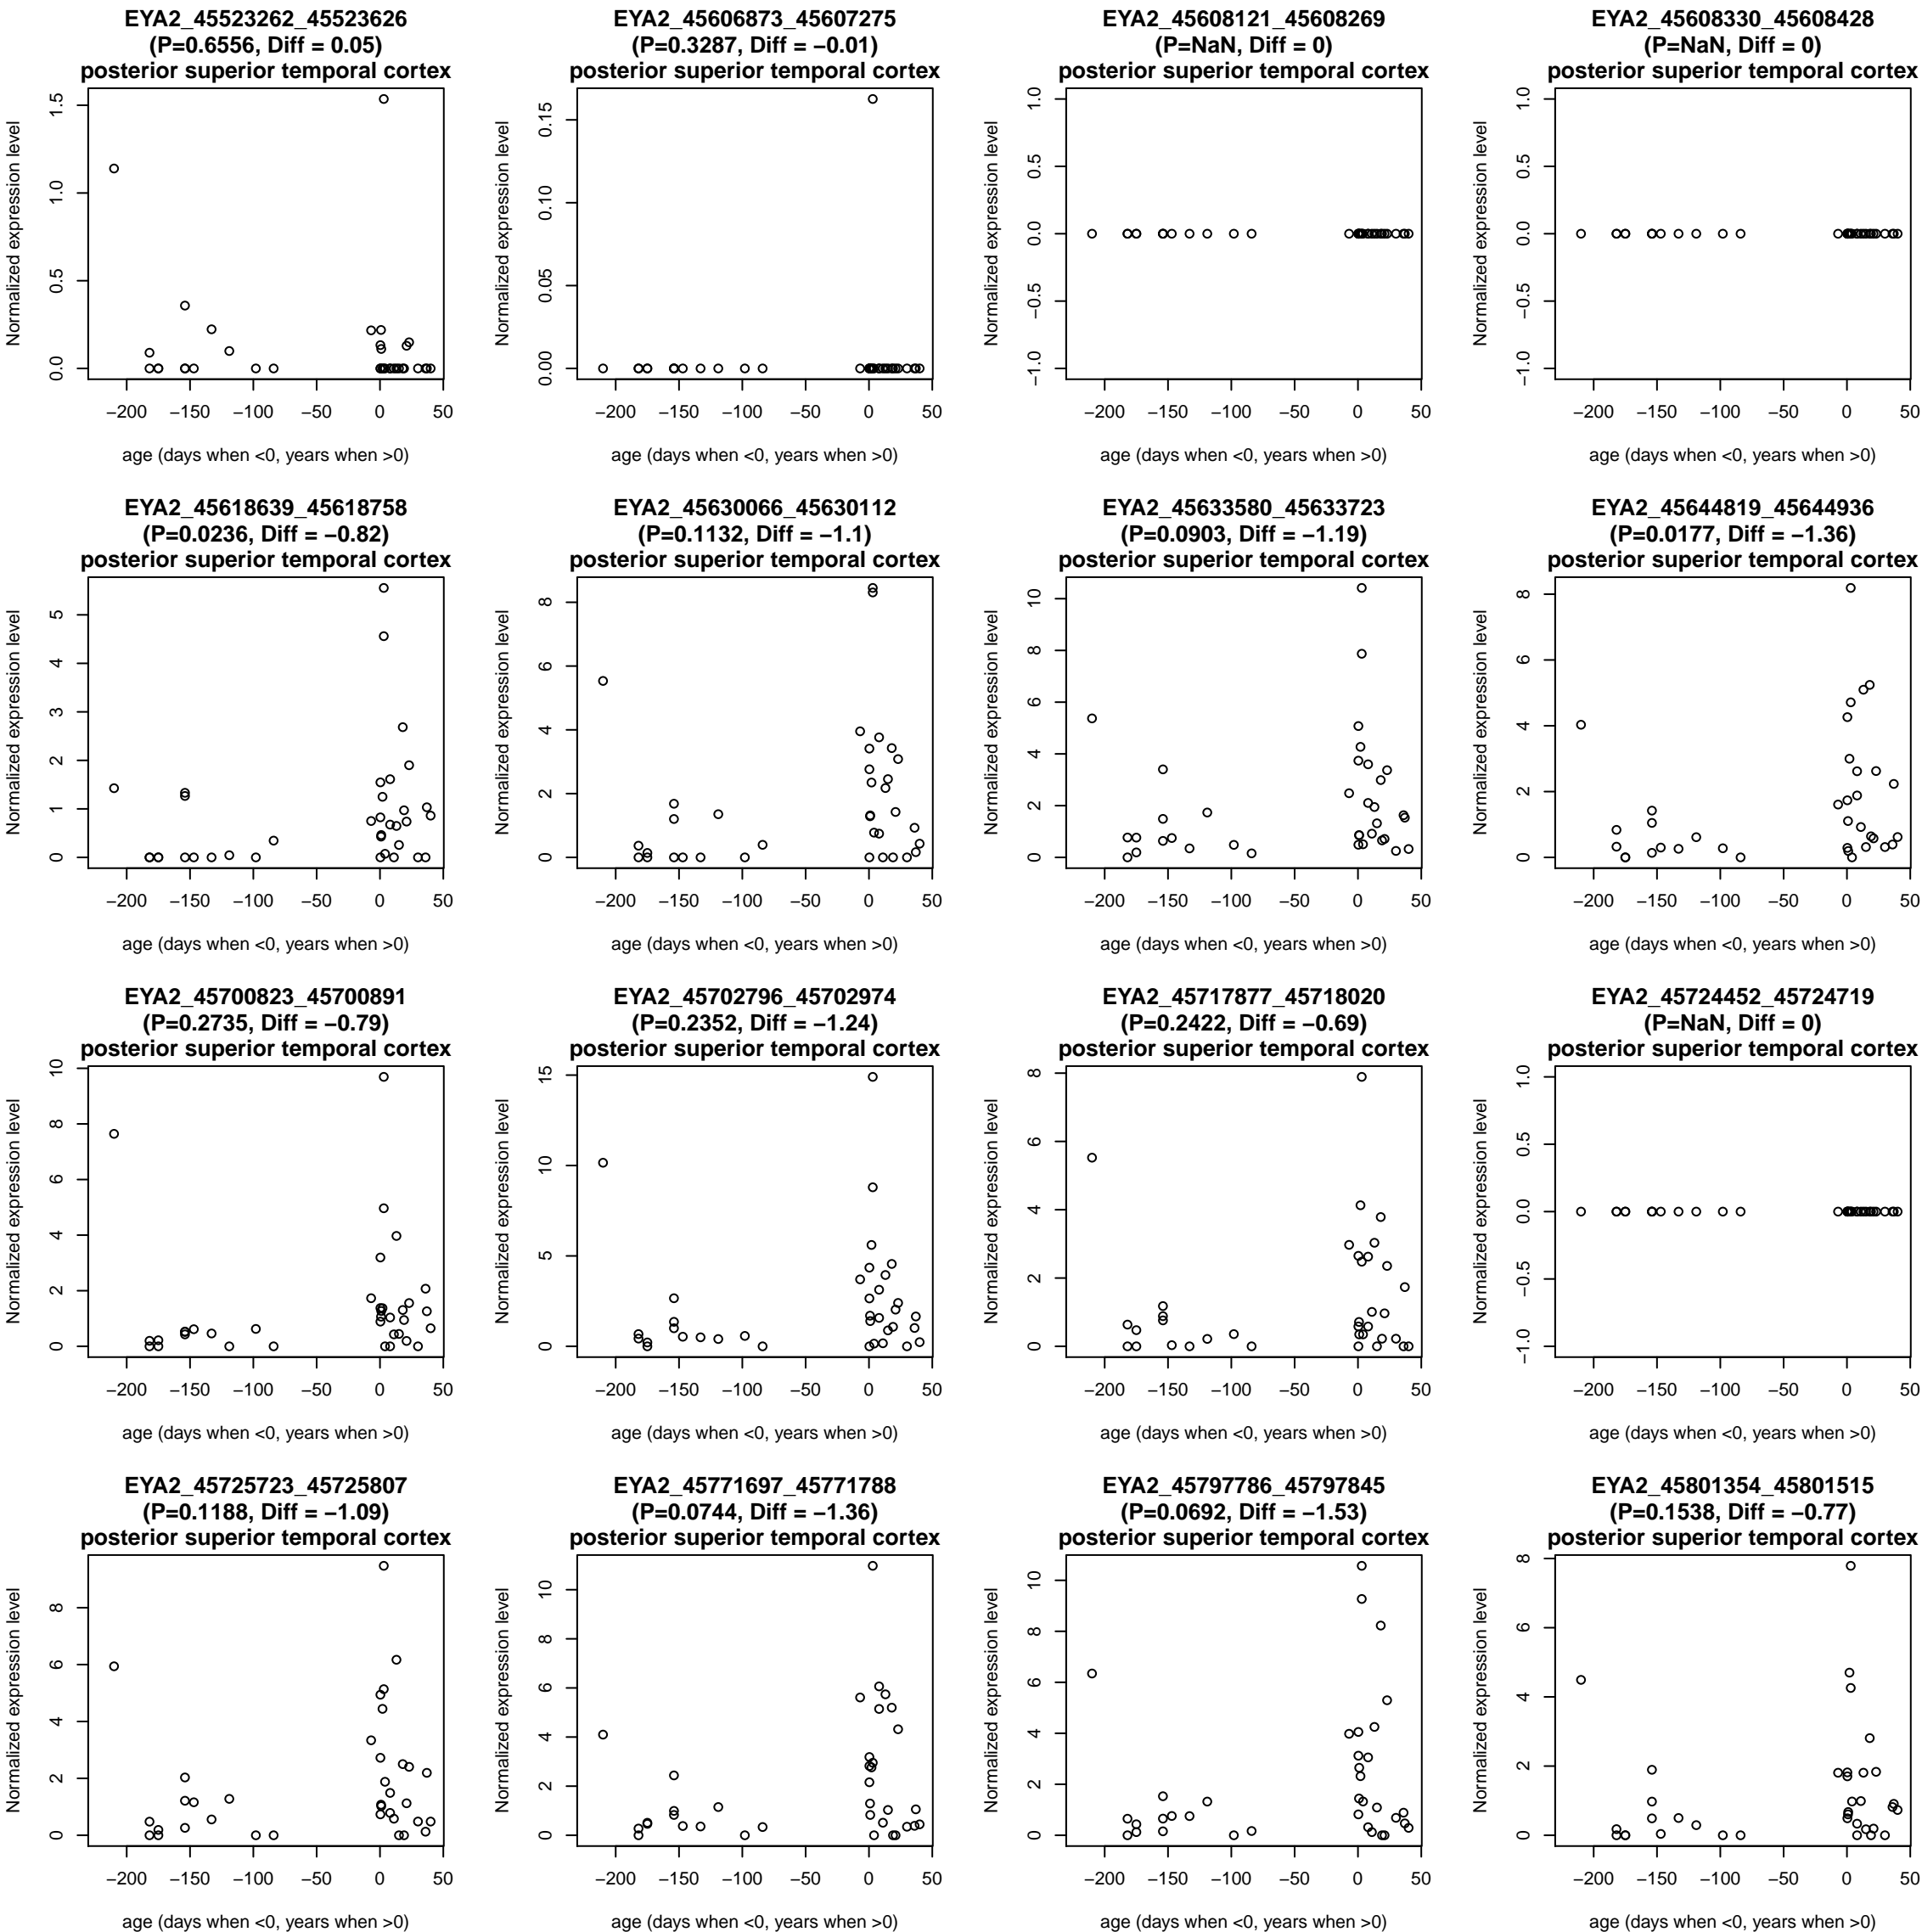

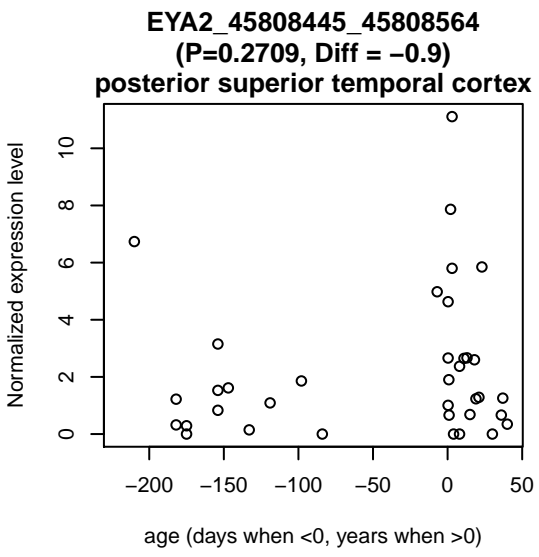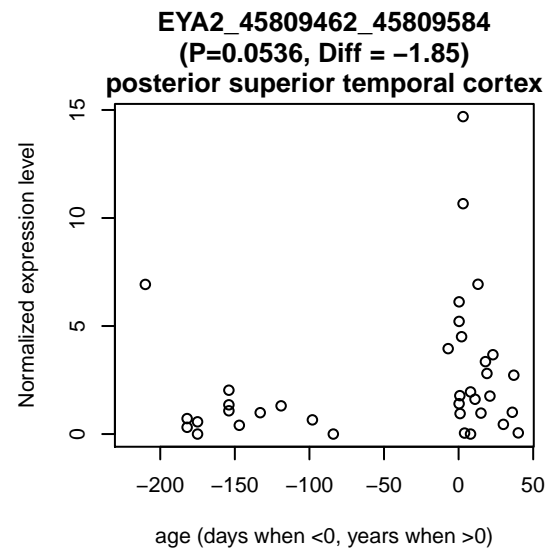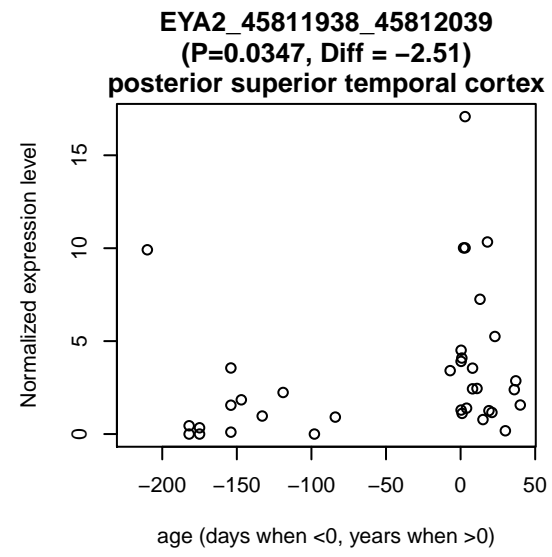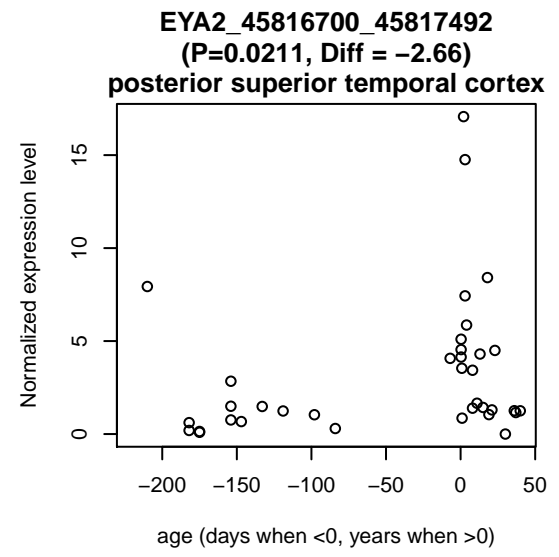

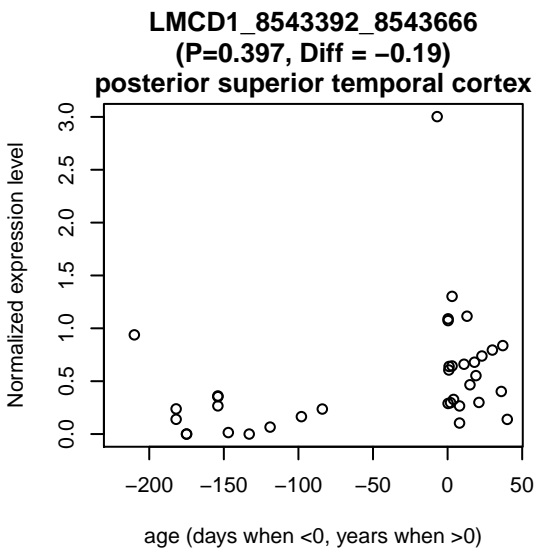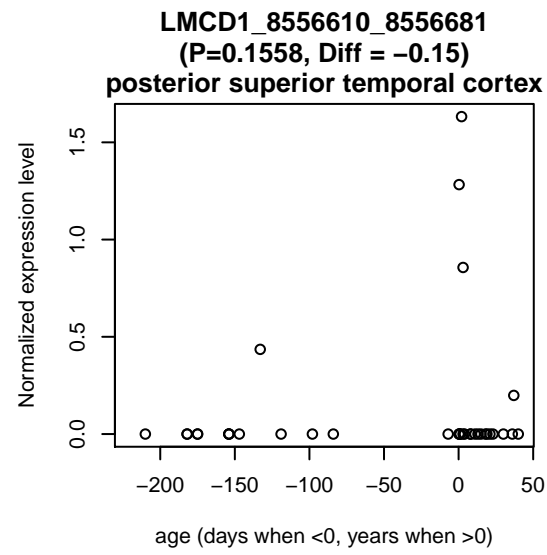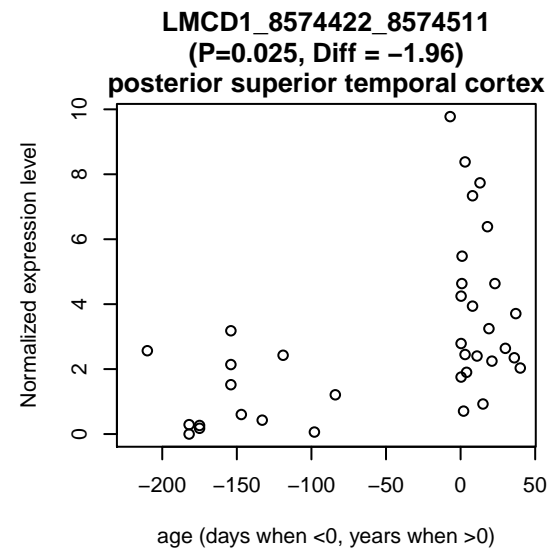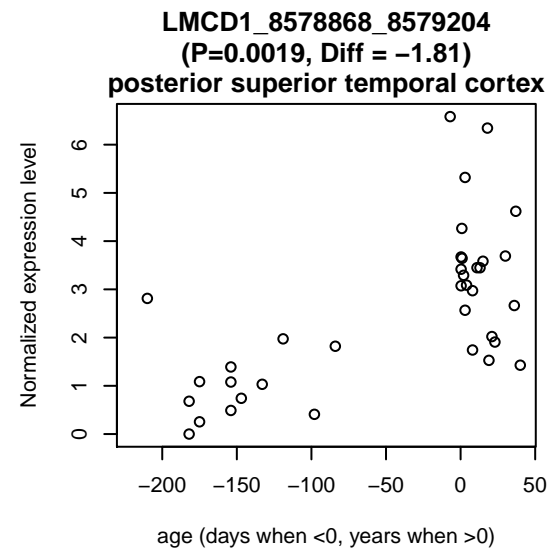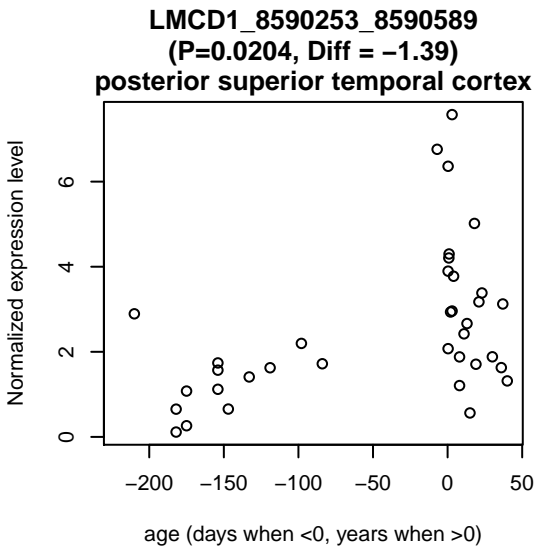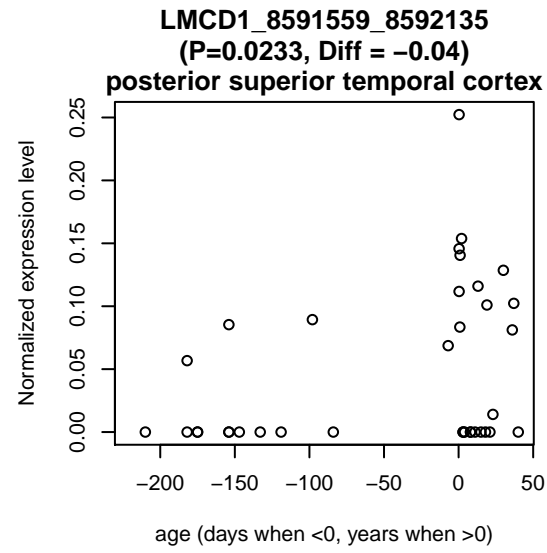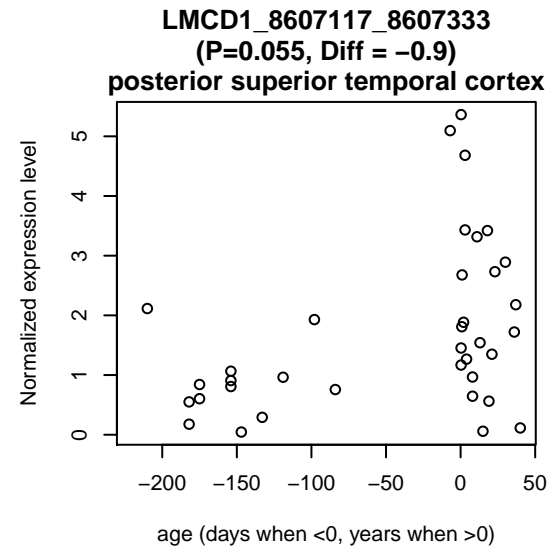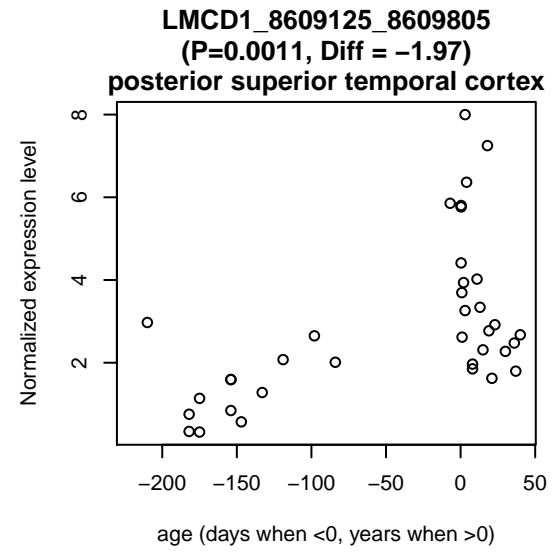

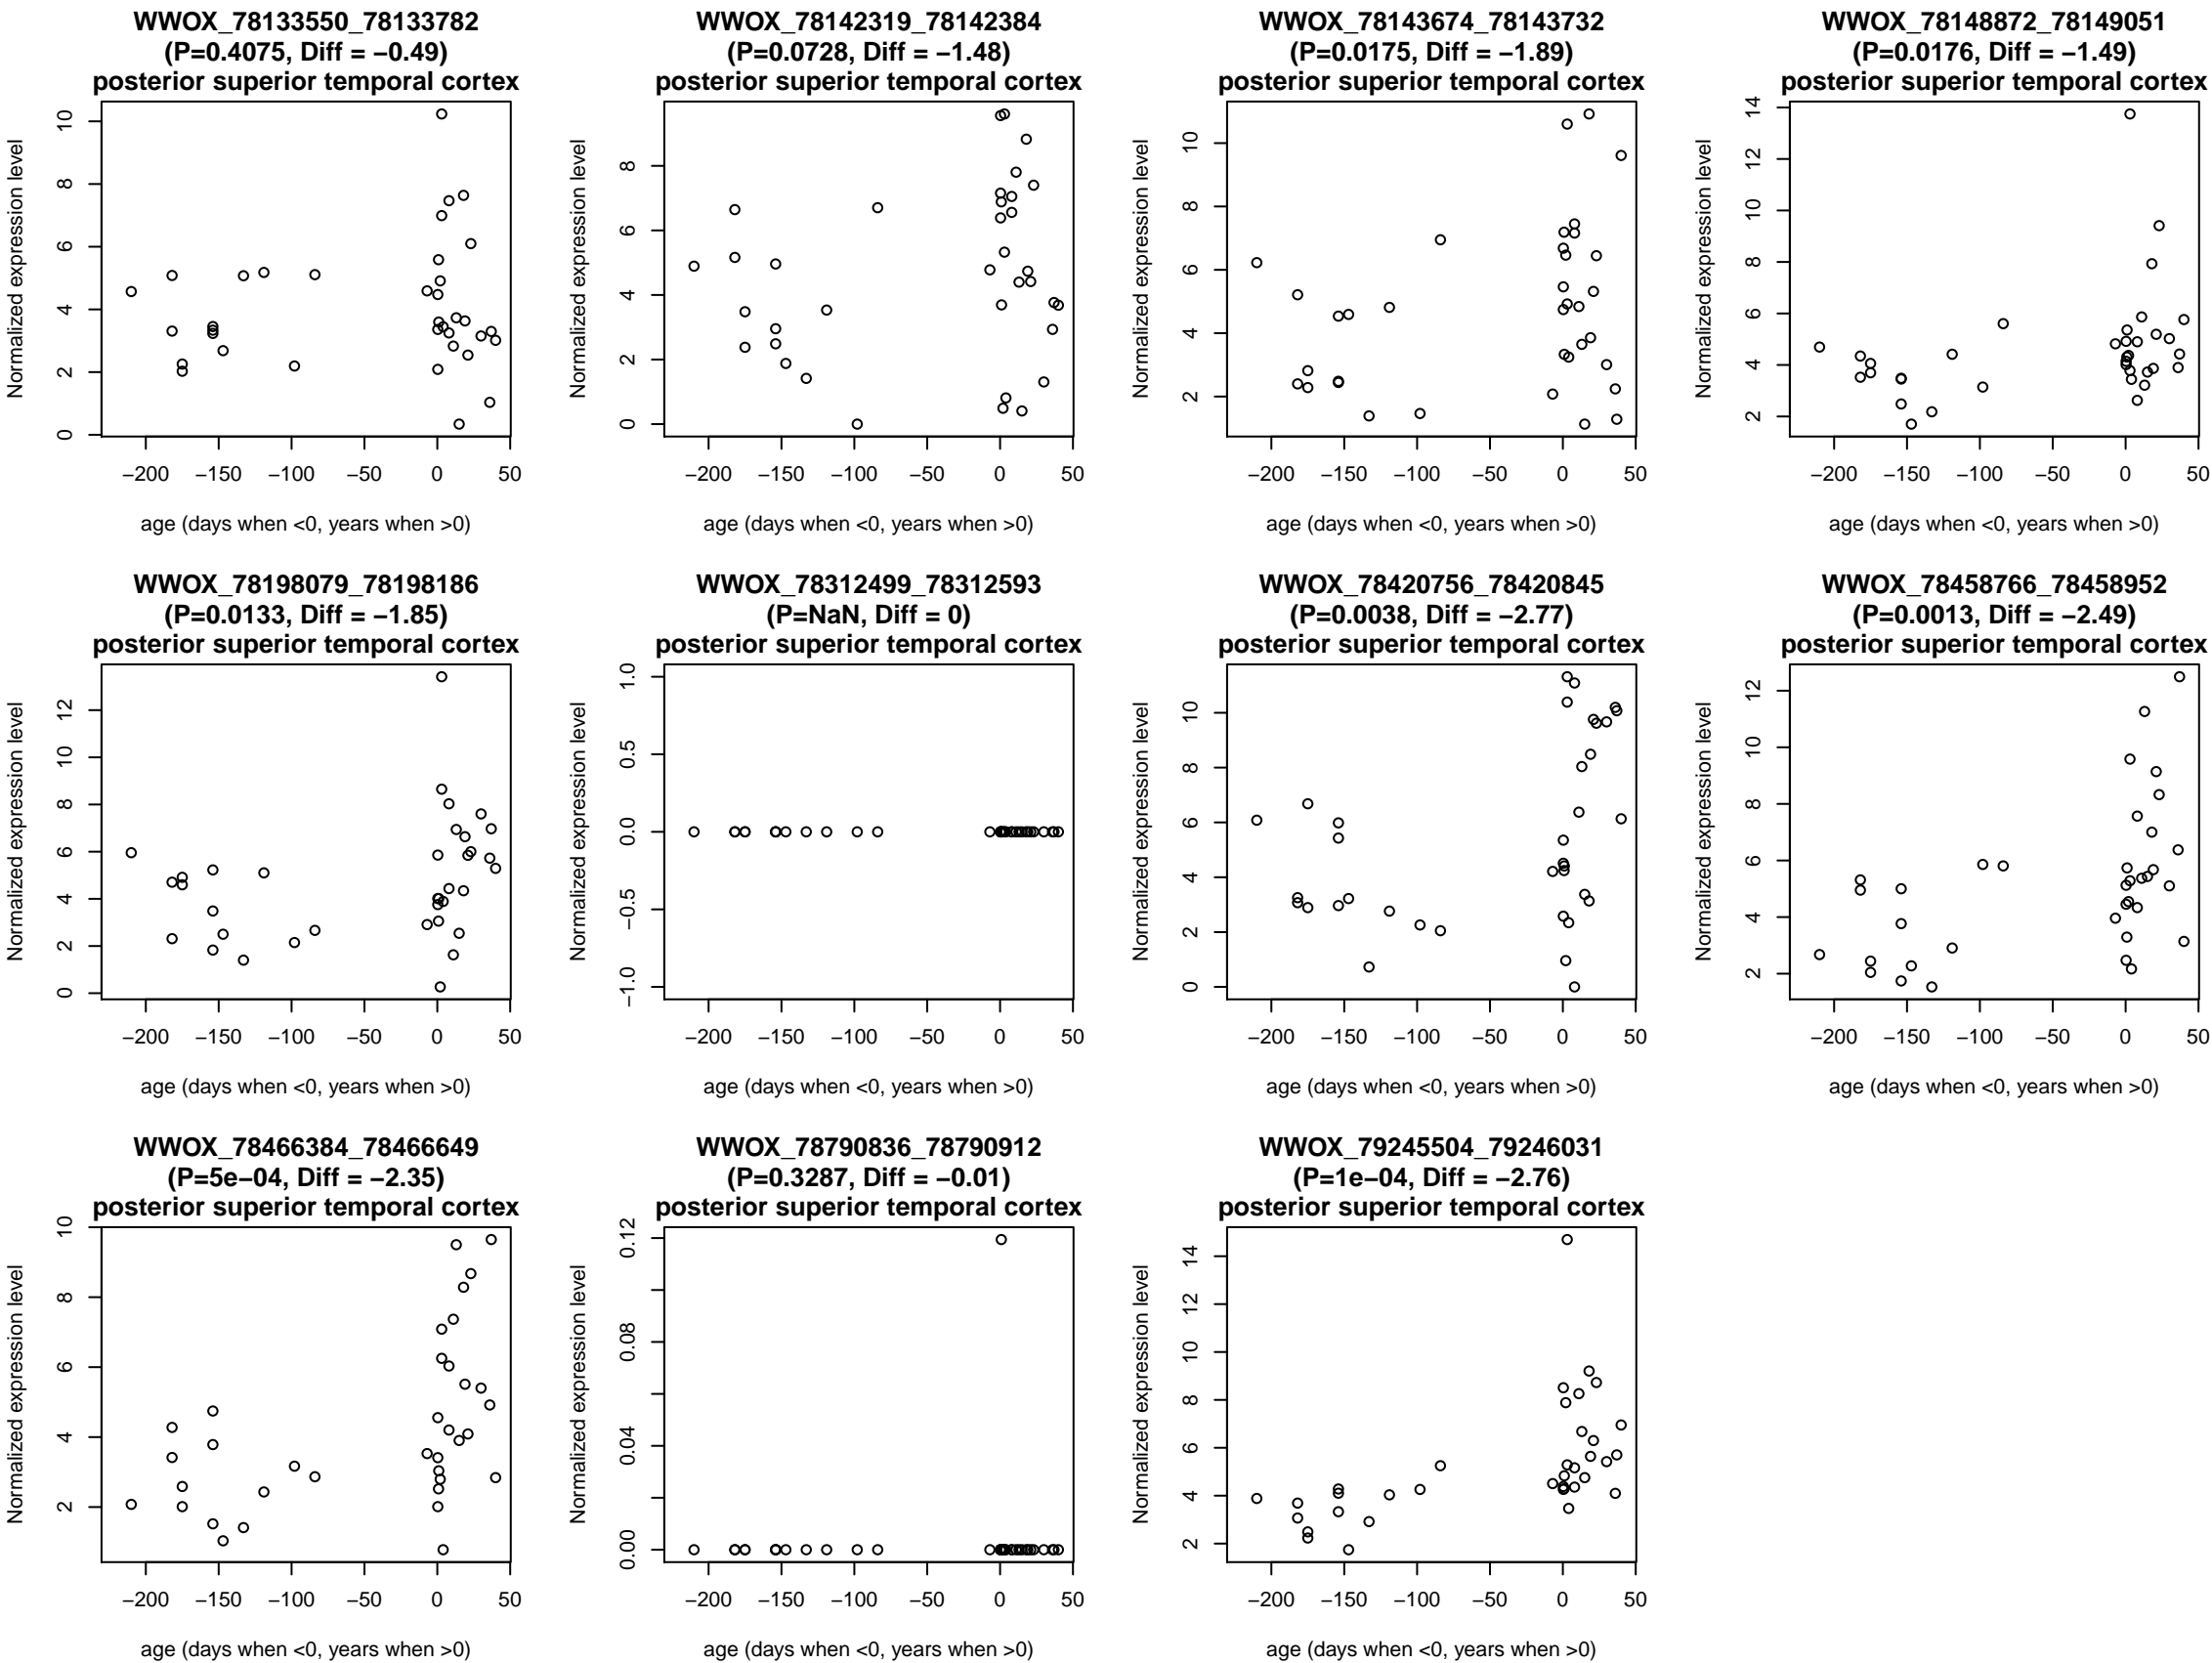

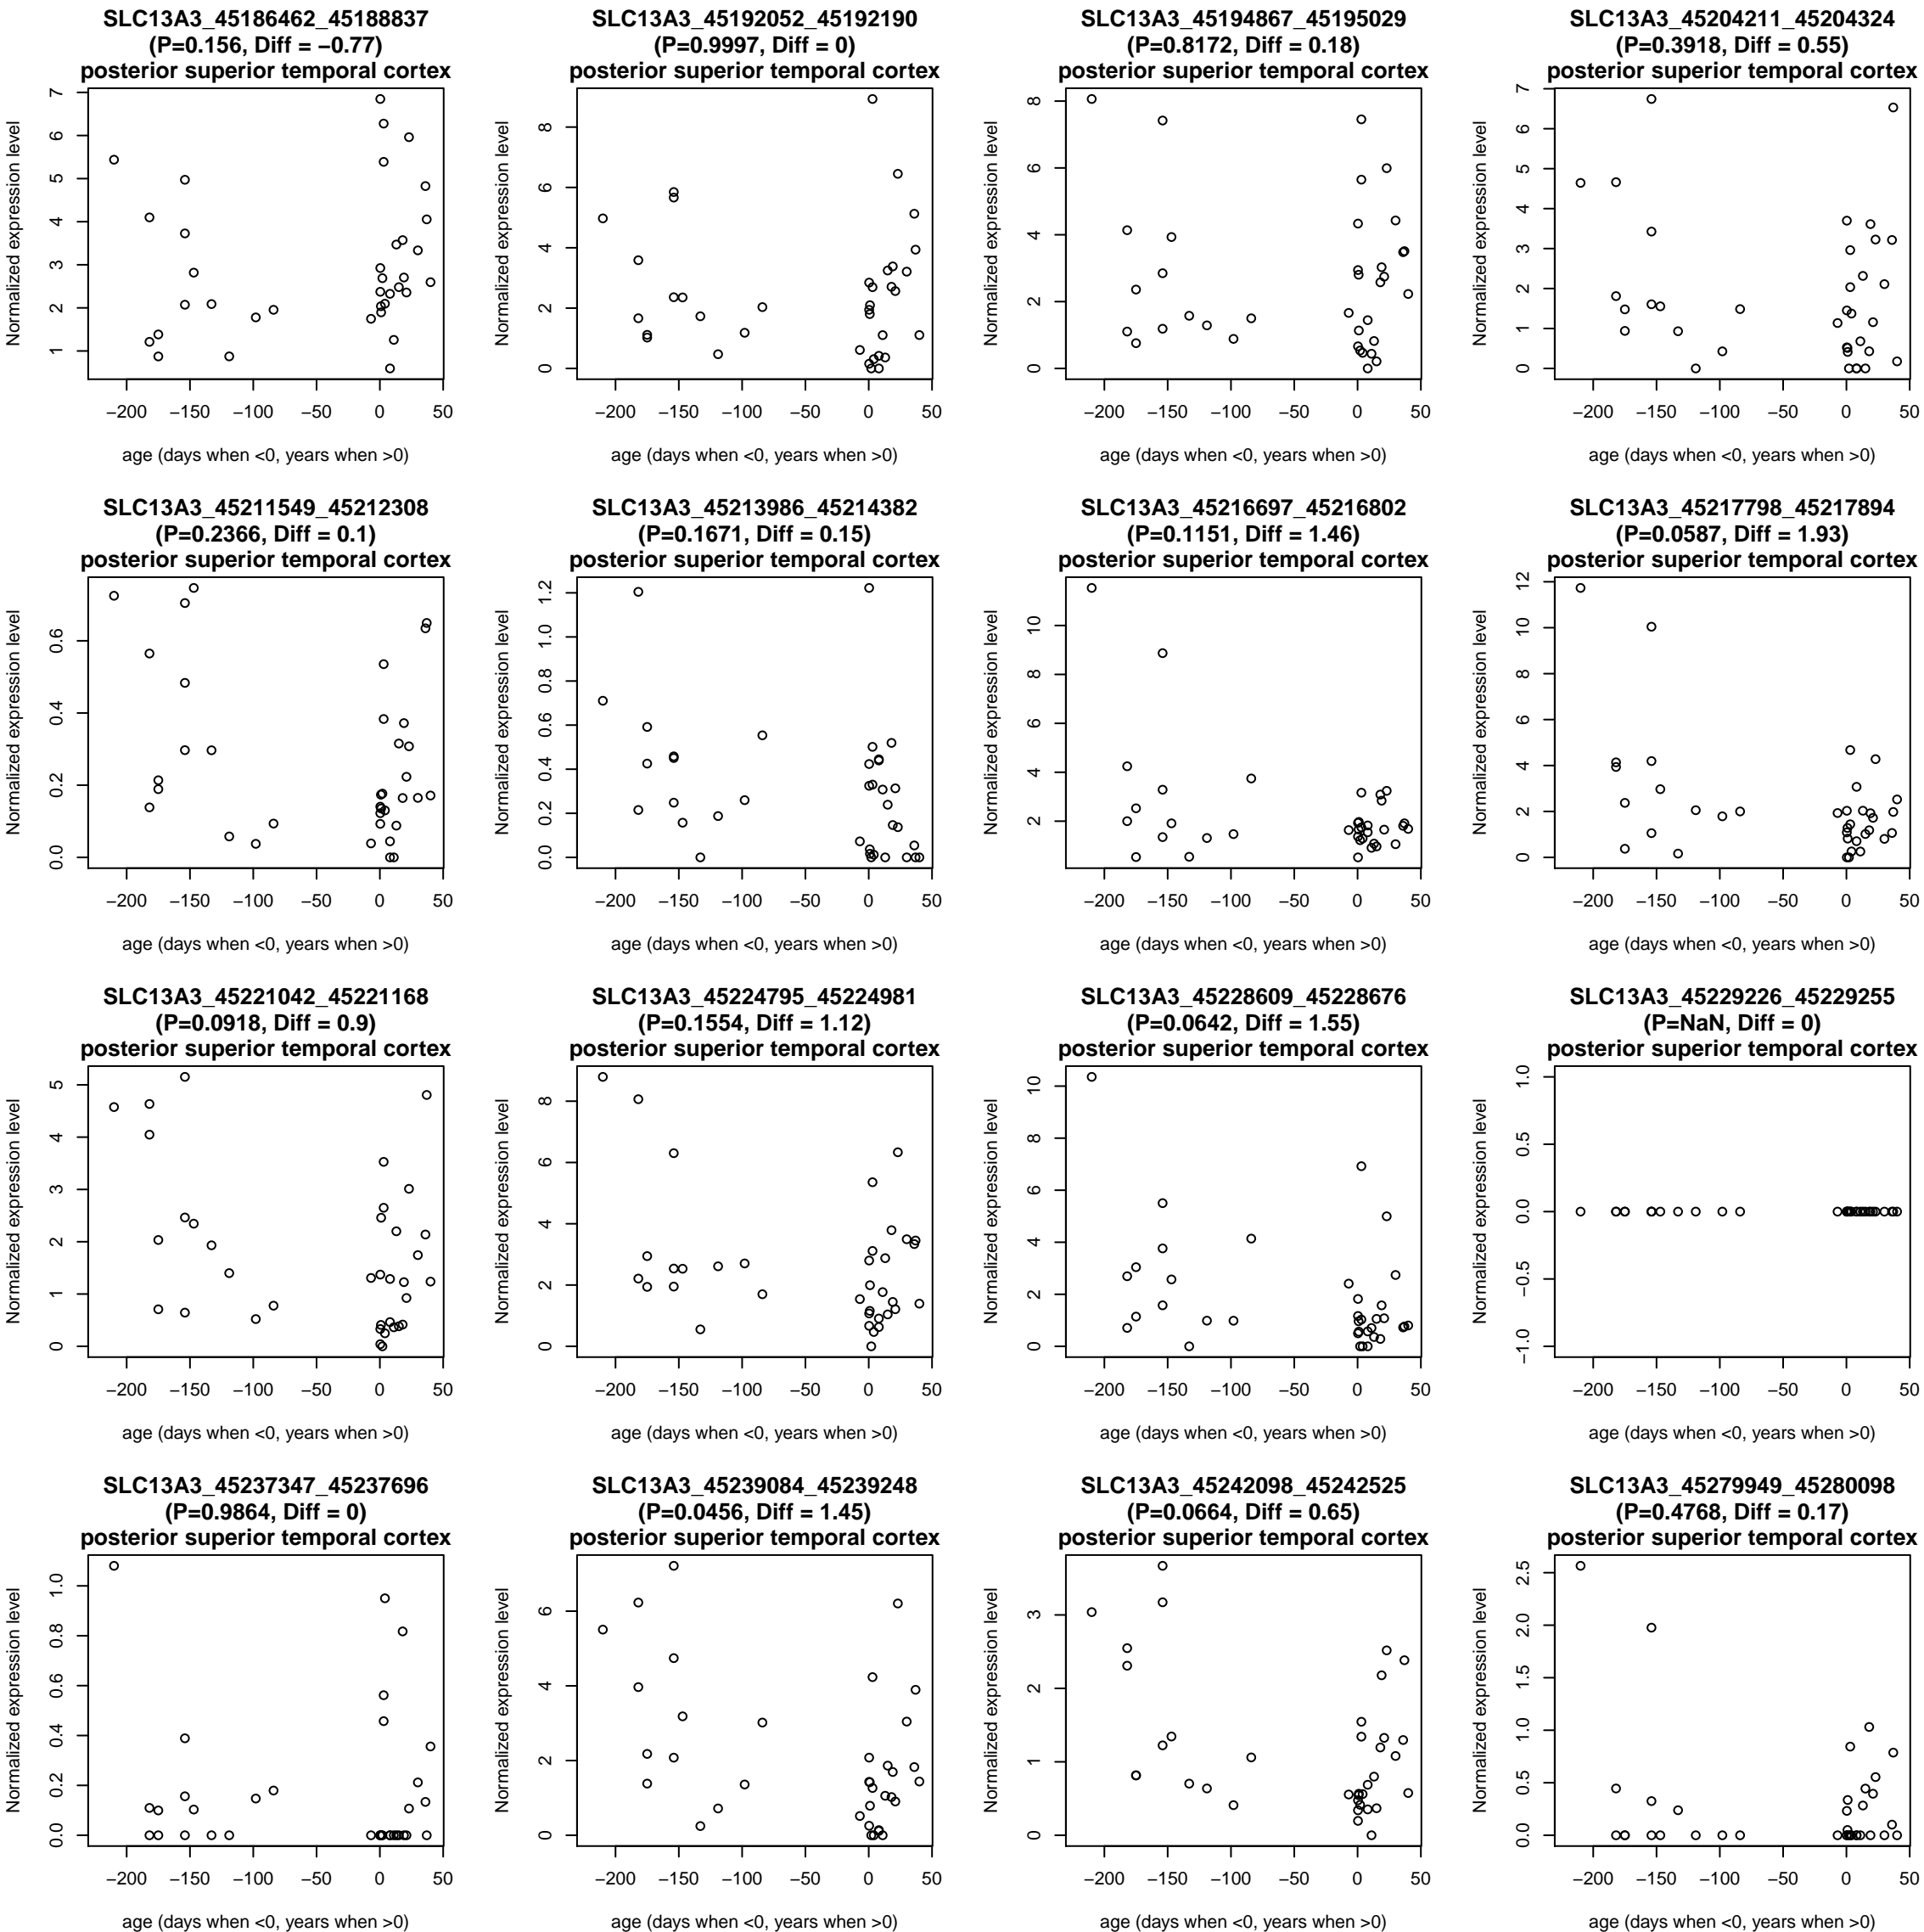

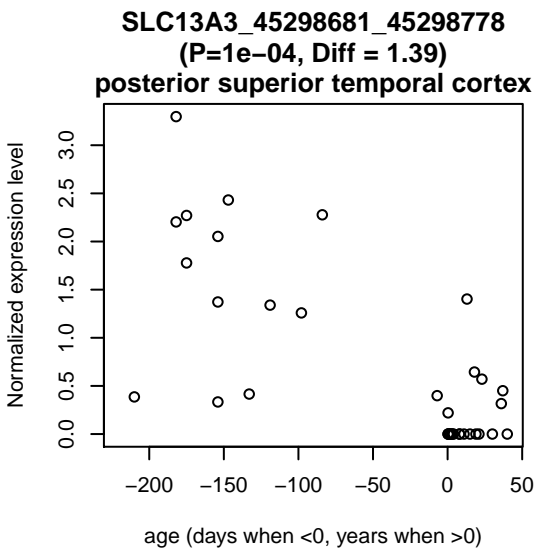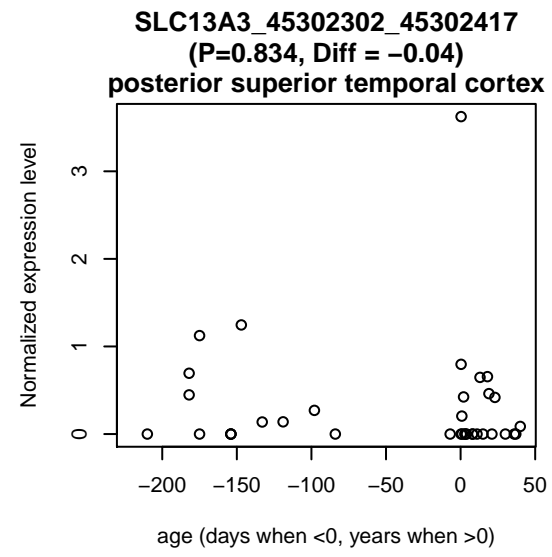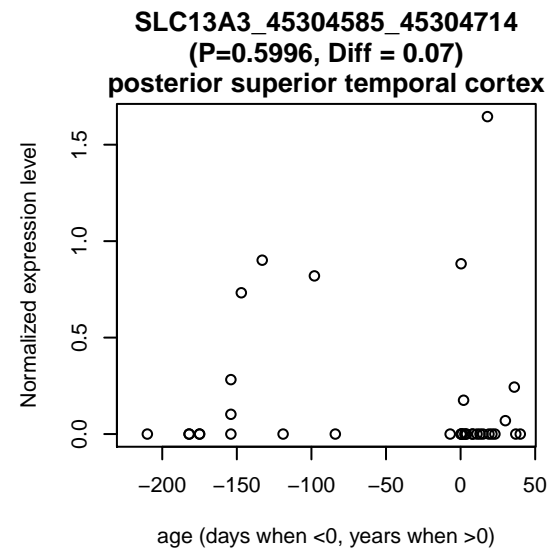

HTR1B\_78171947\_78173490

(P=0.0014, Diff = -0.61)

posterior superior temporal cortex

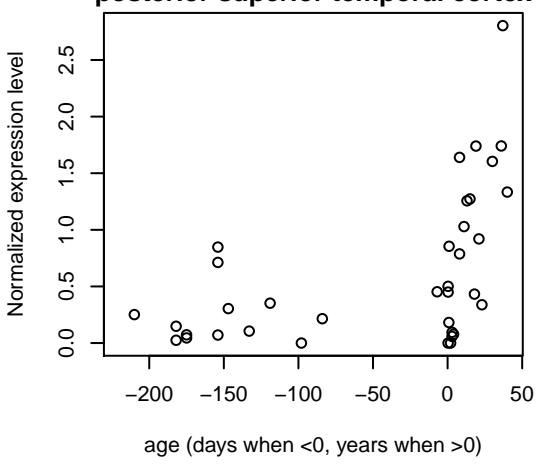



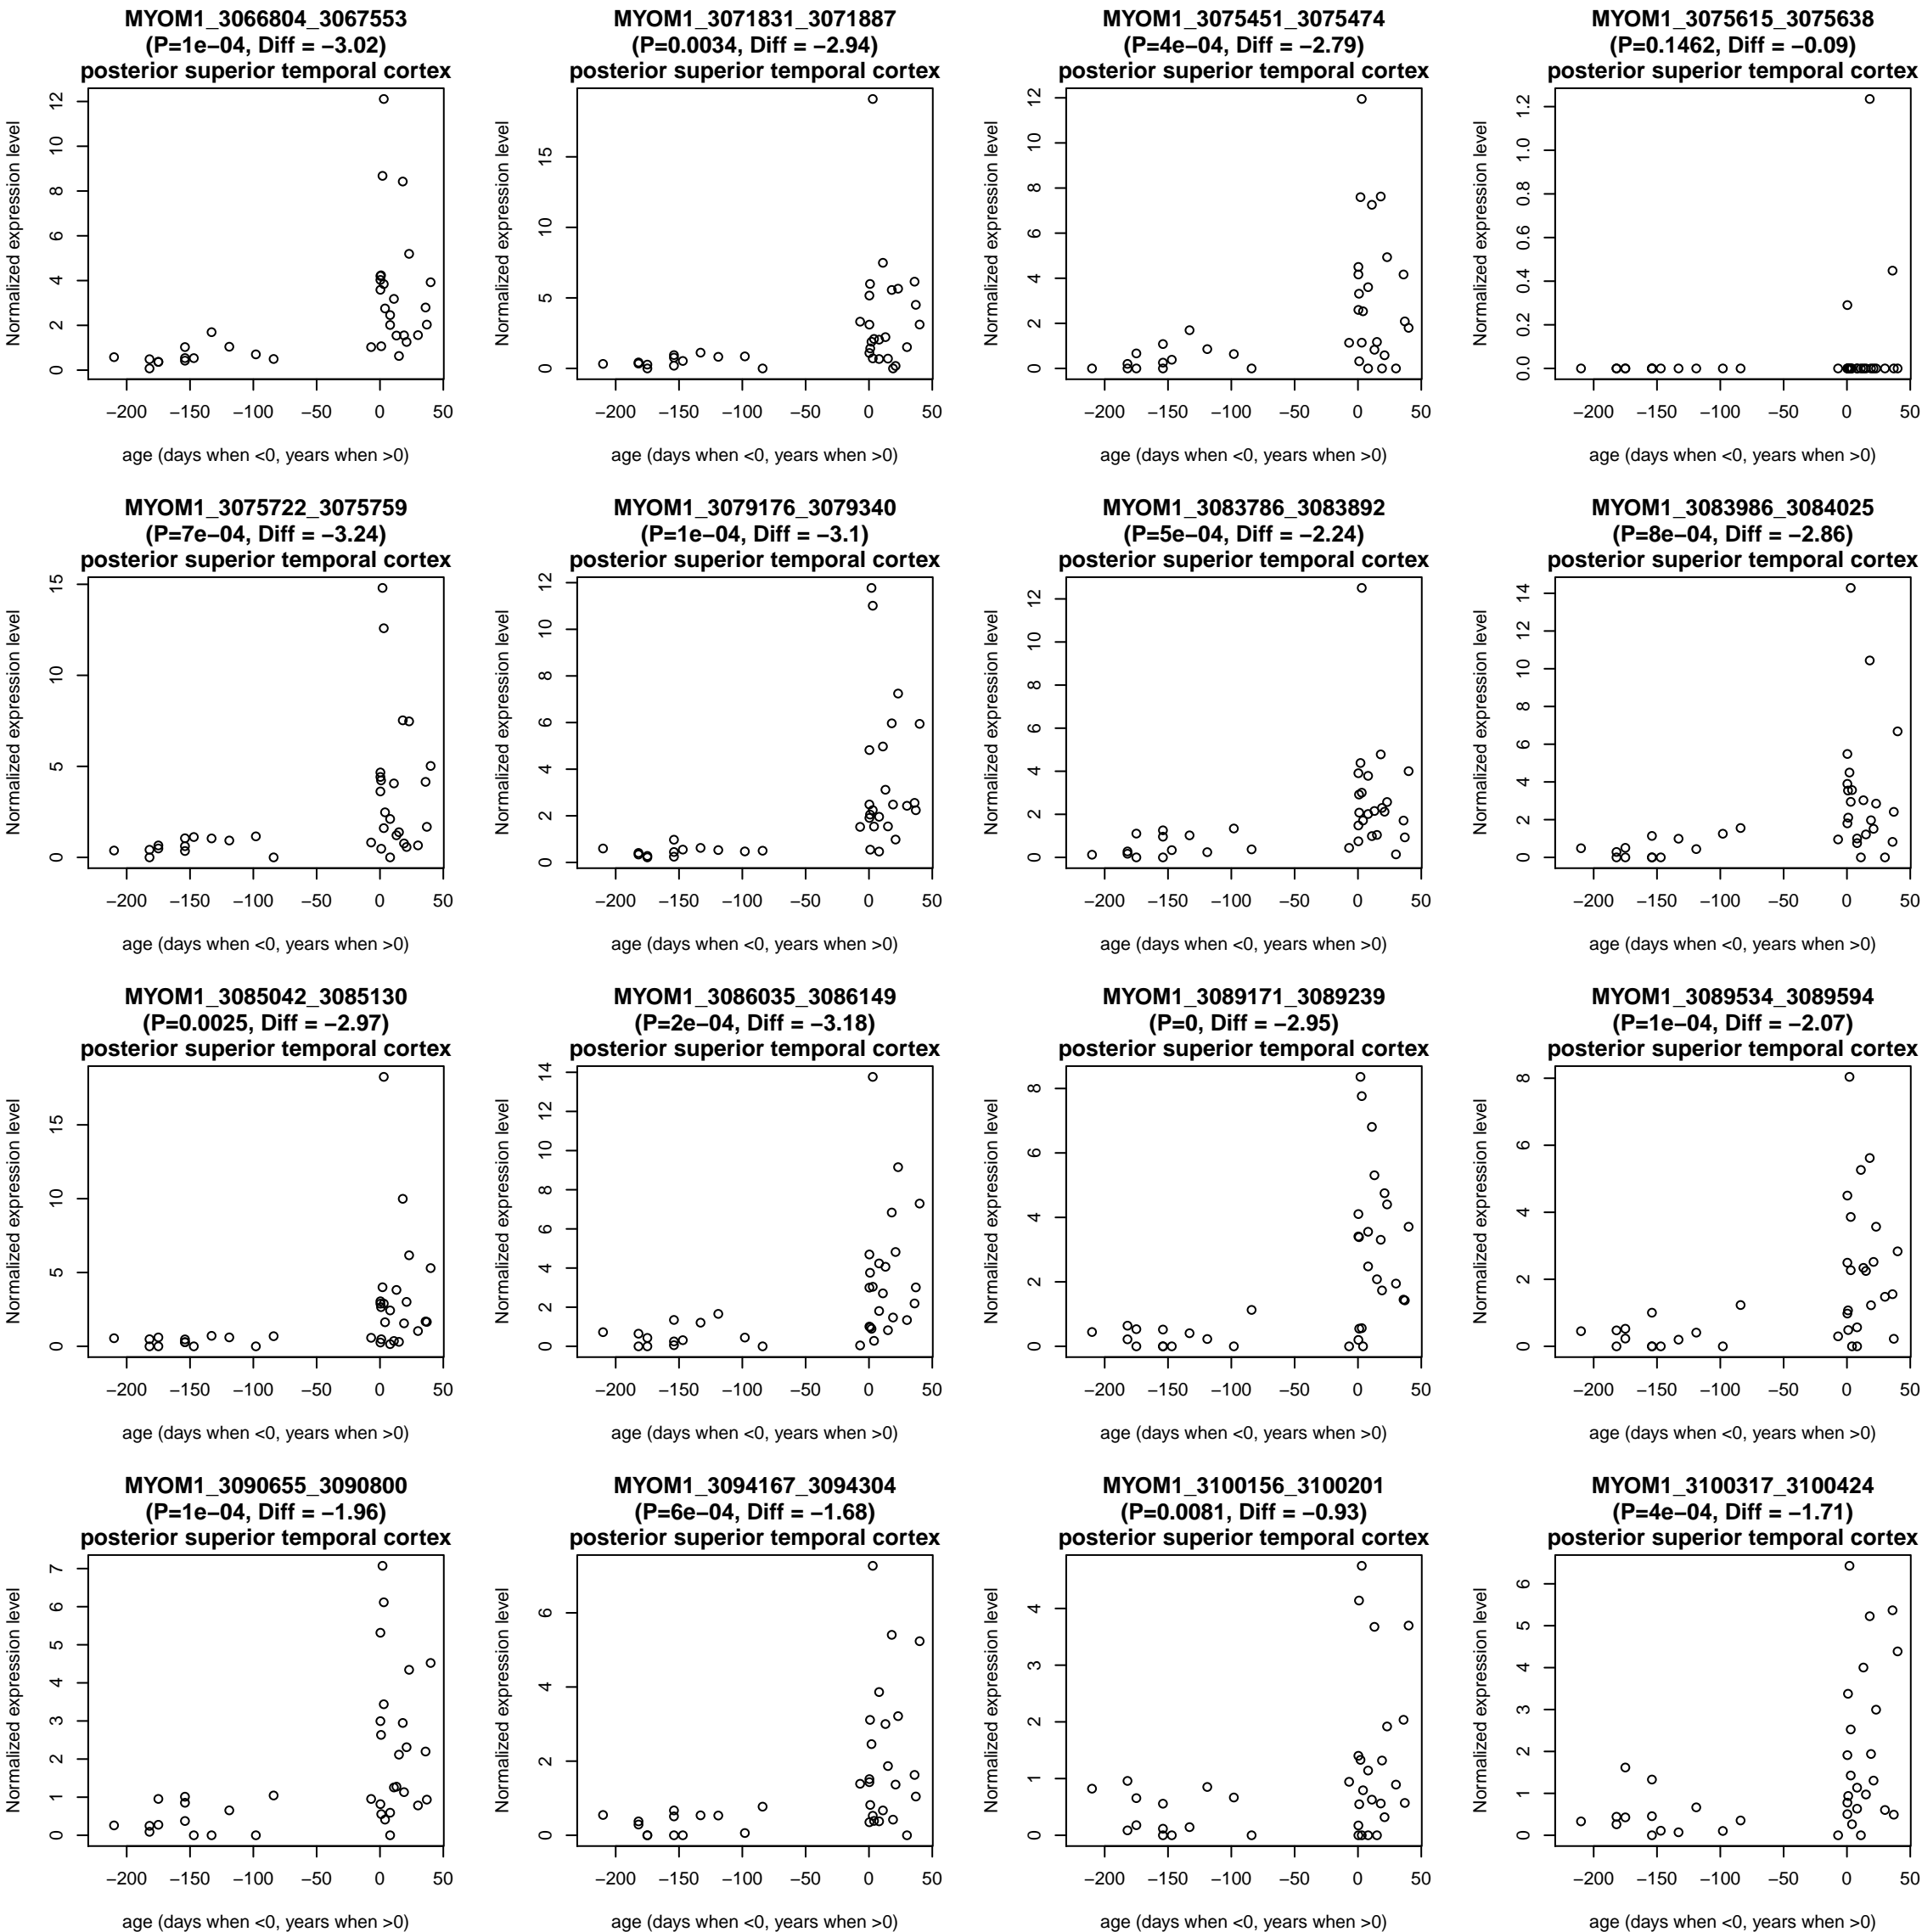

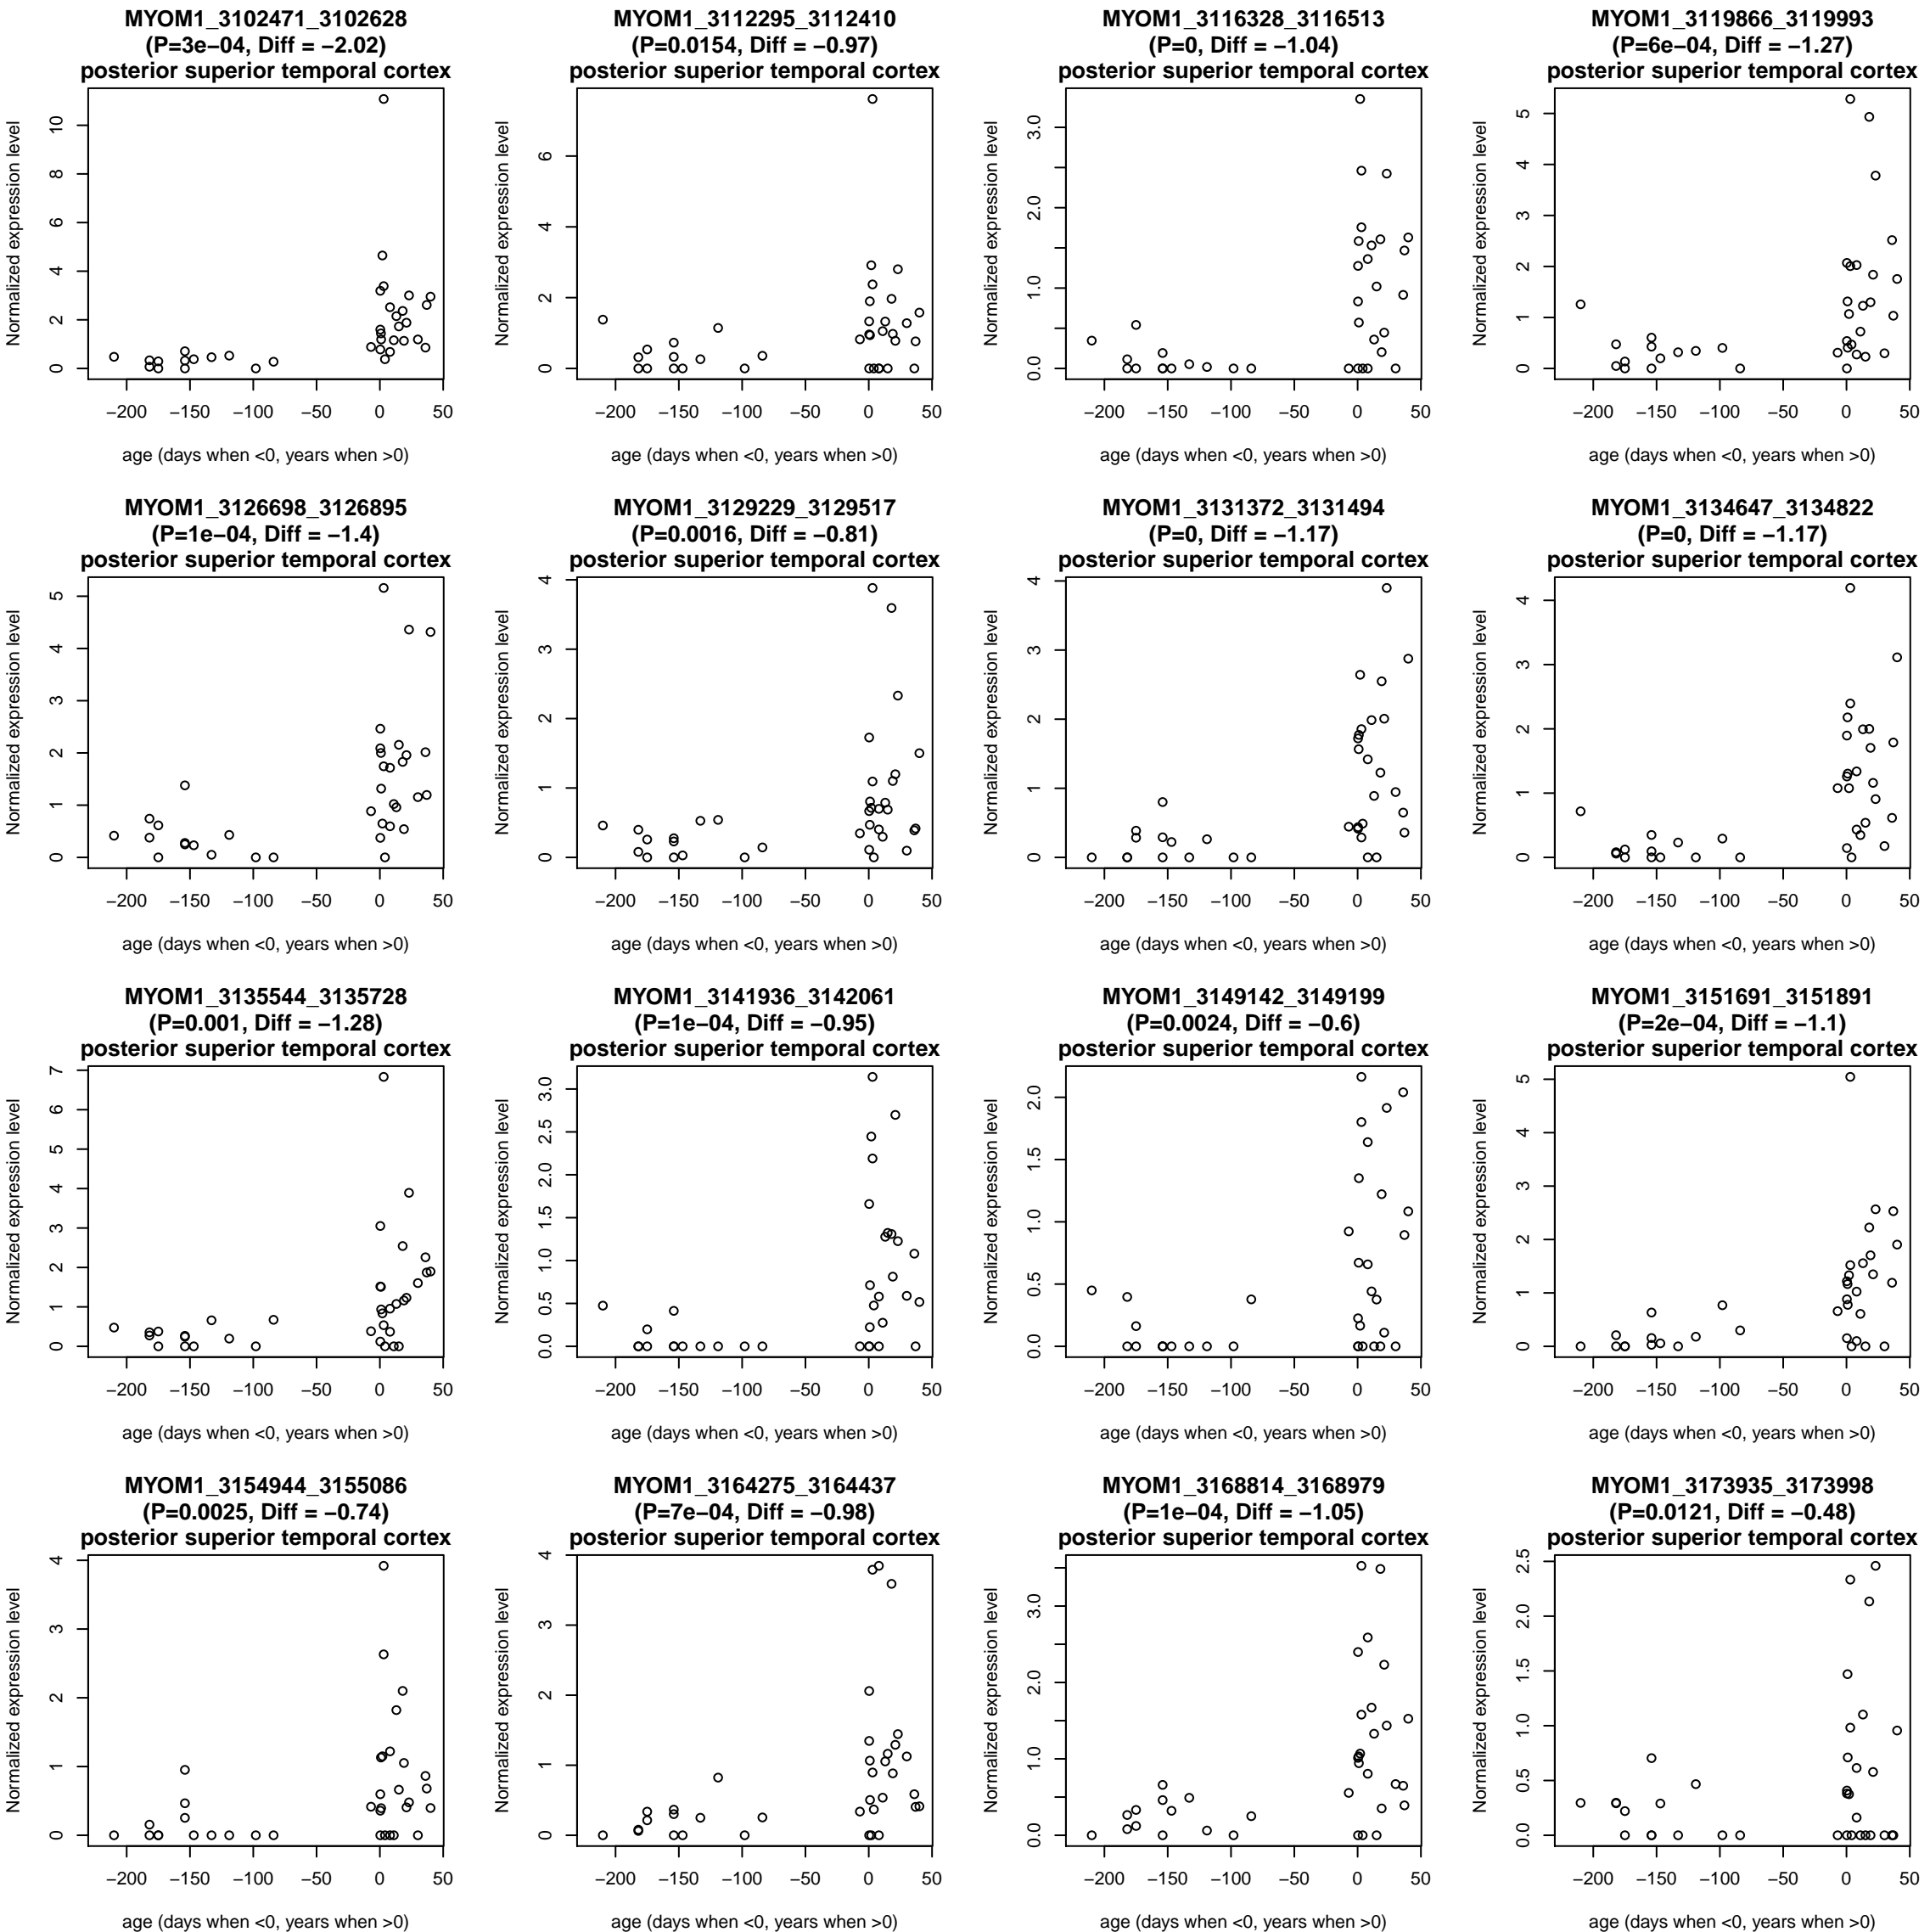

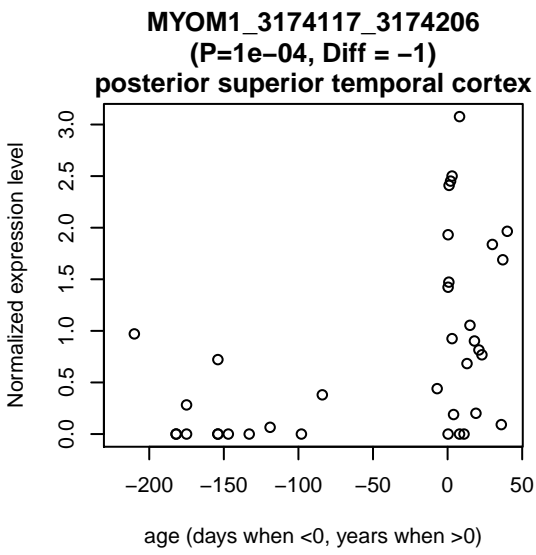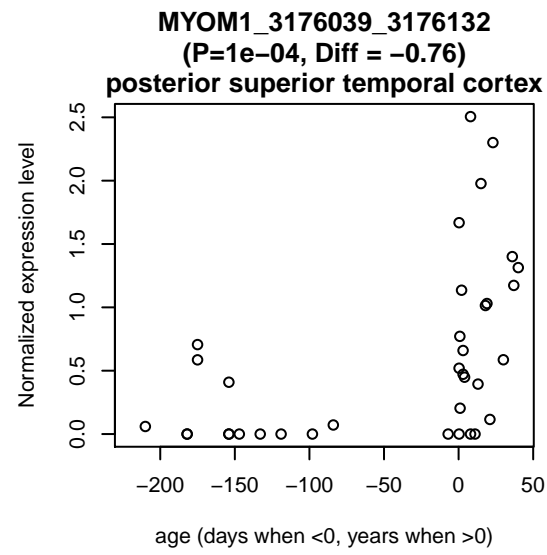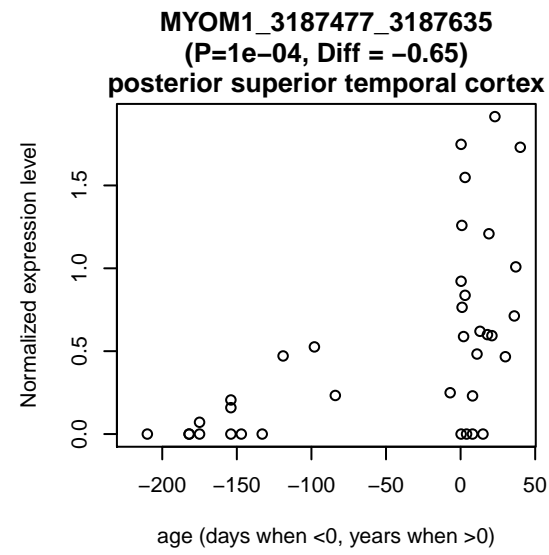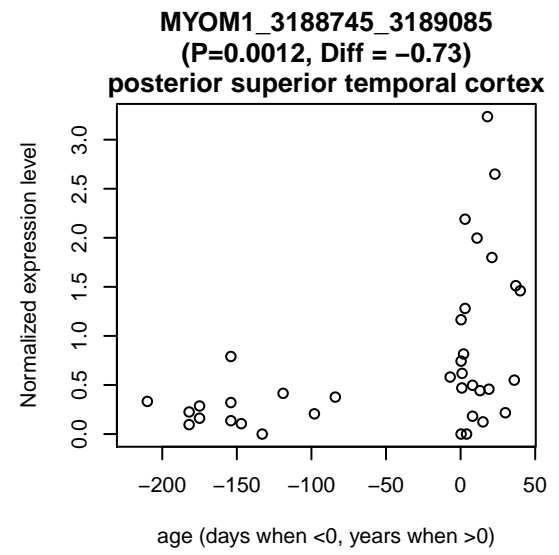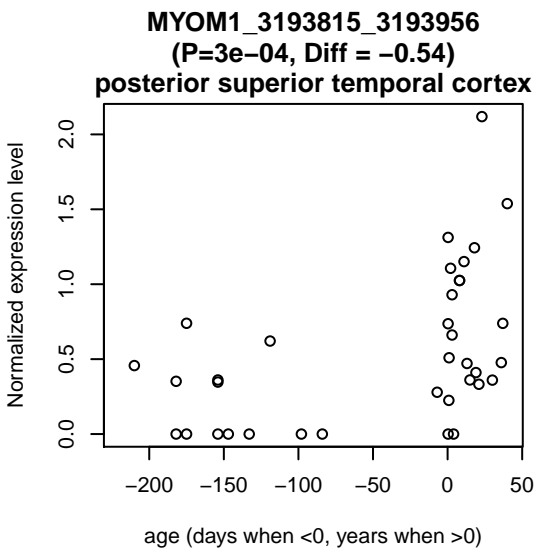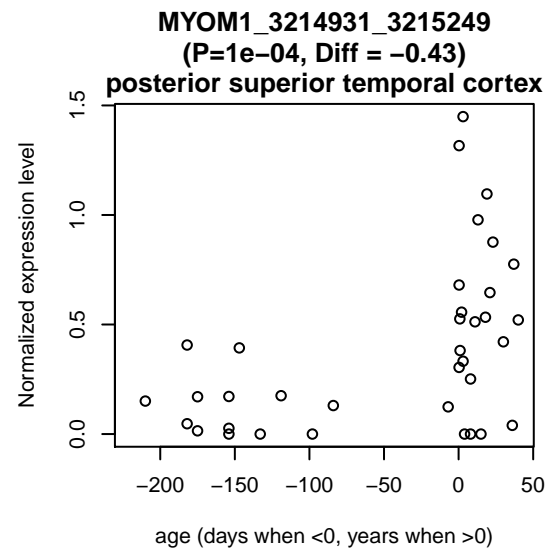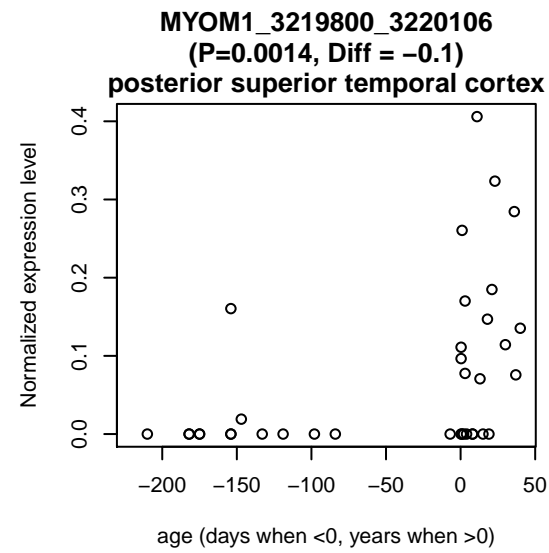

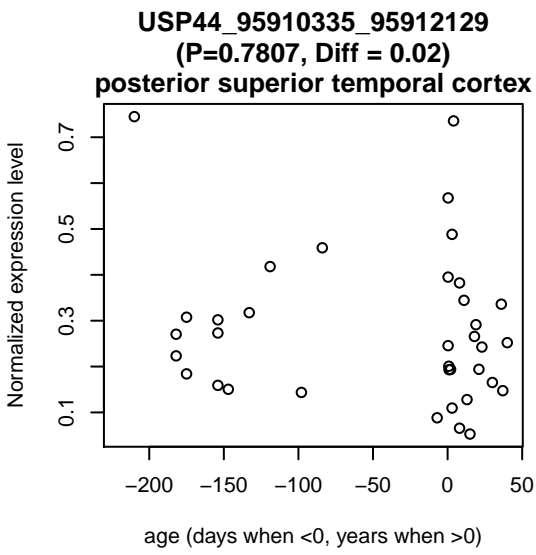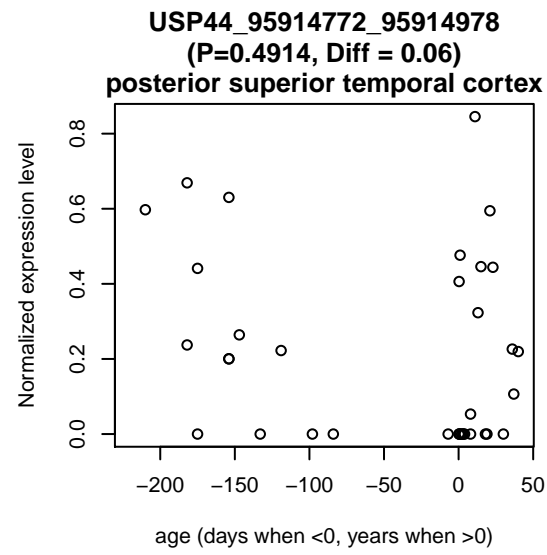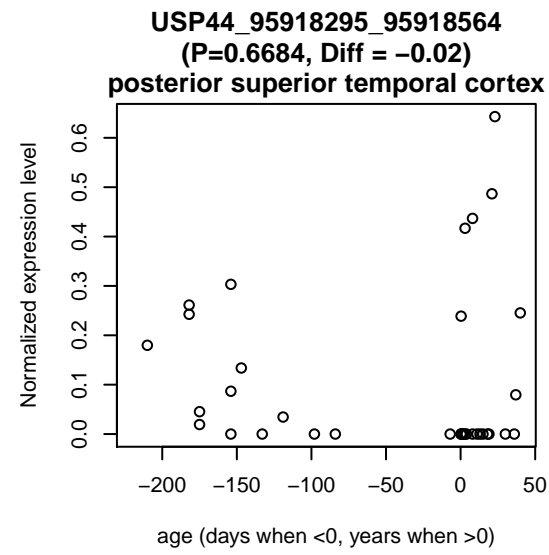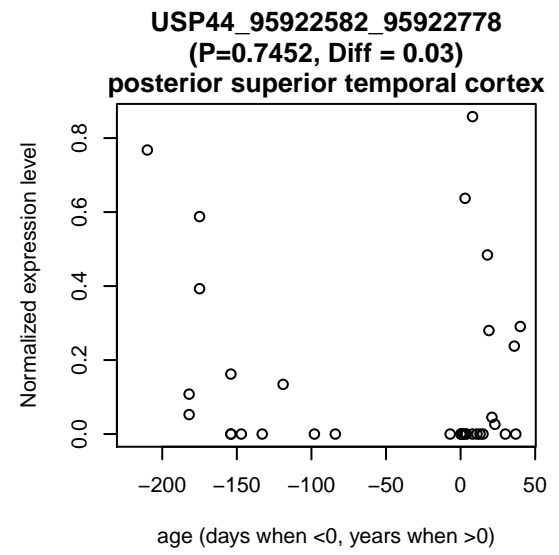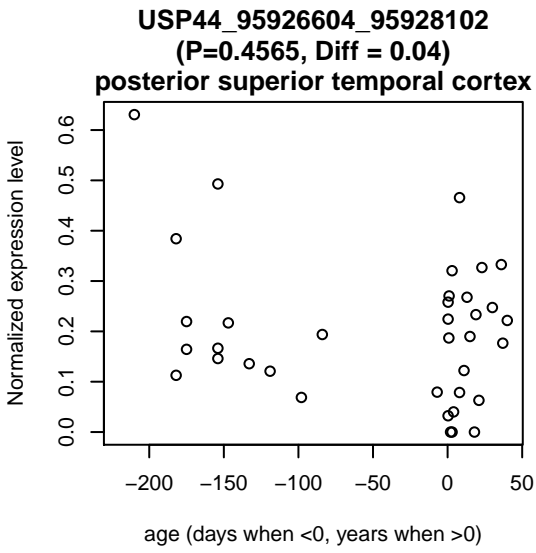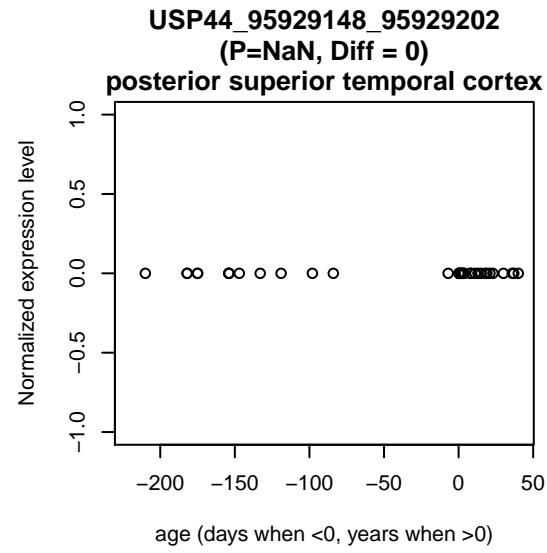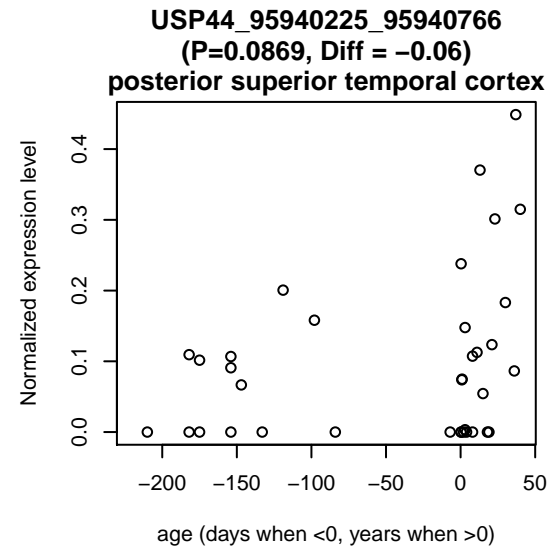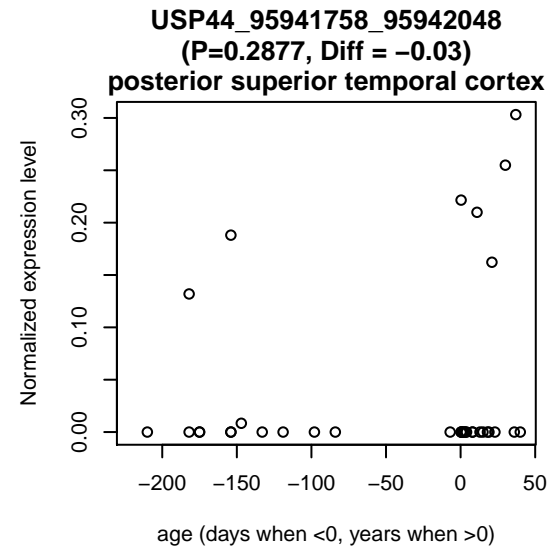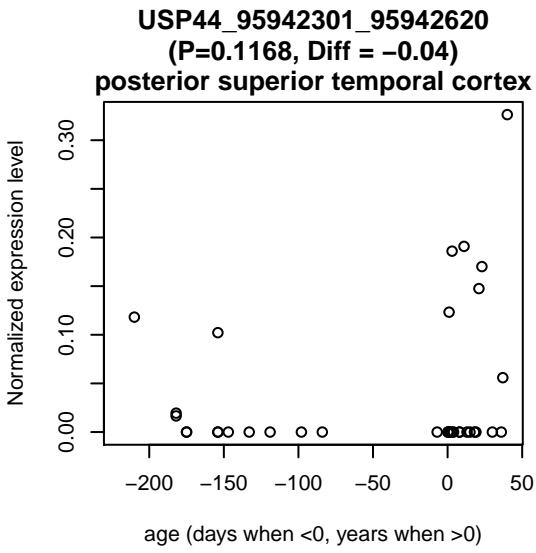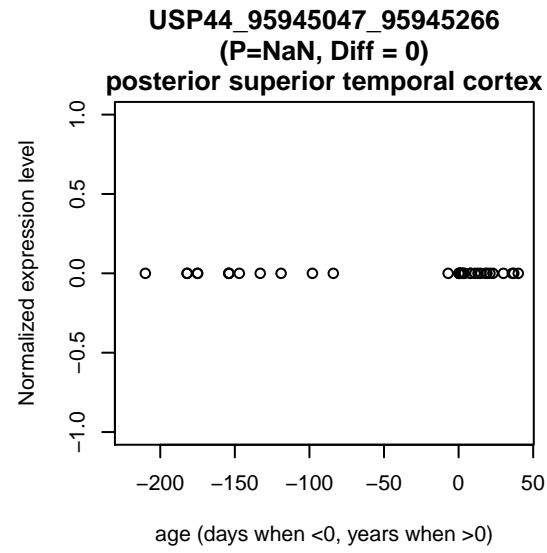

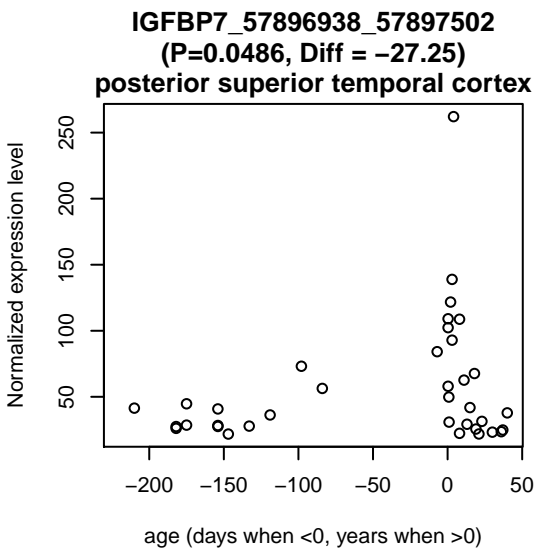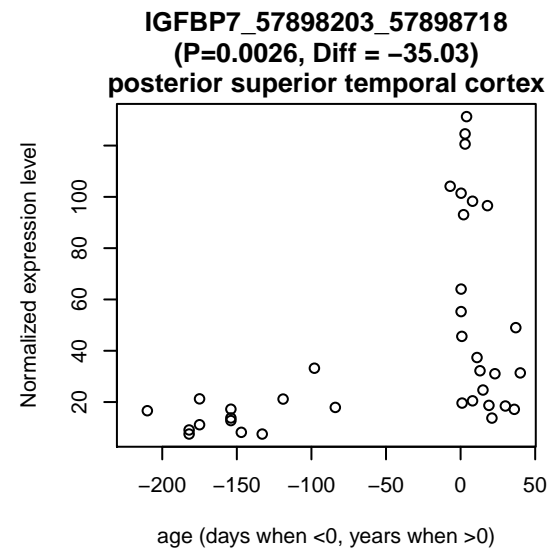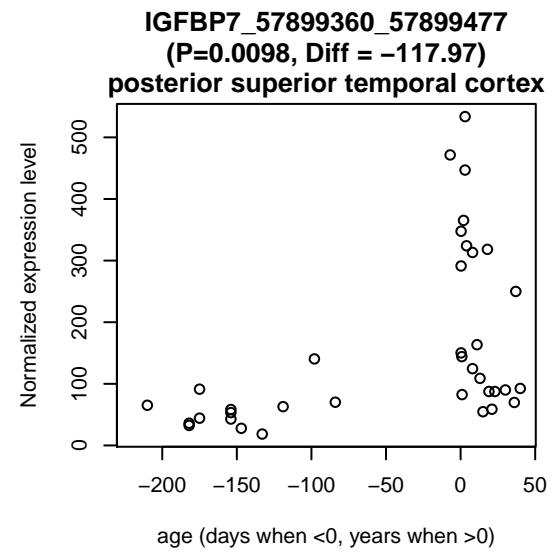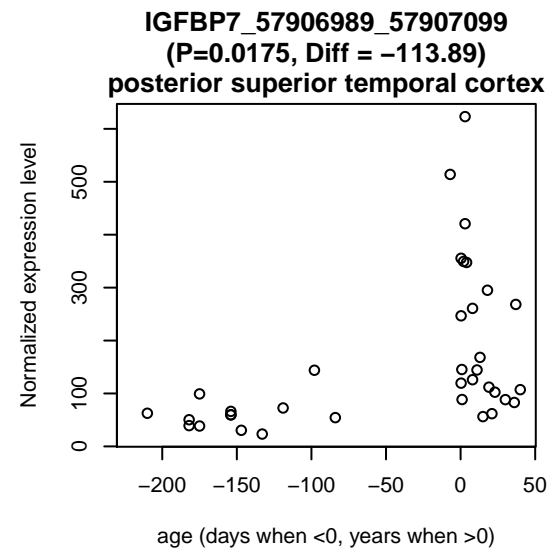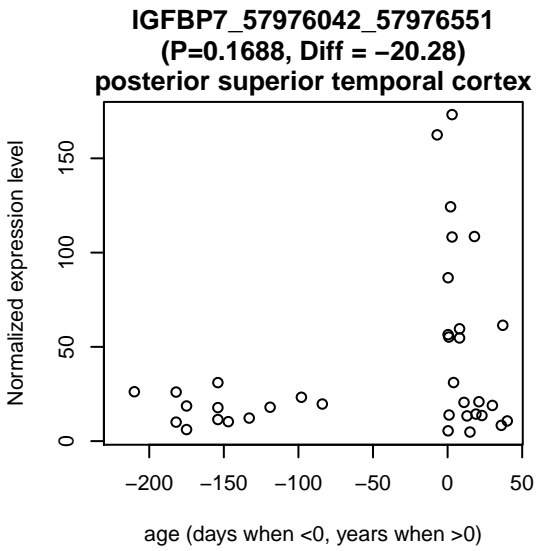

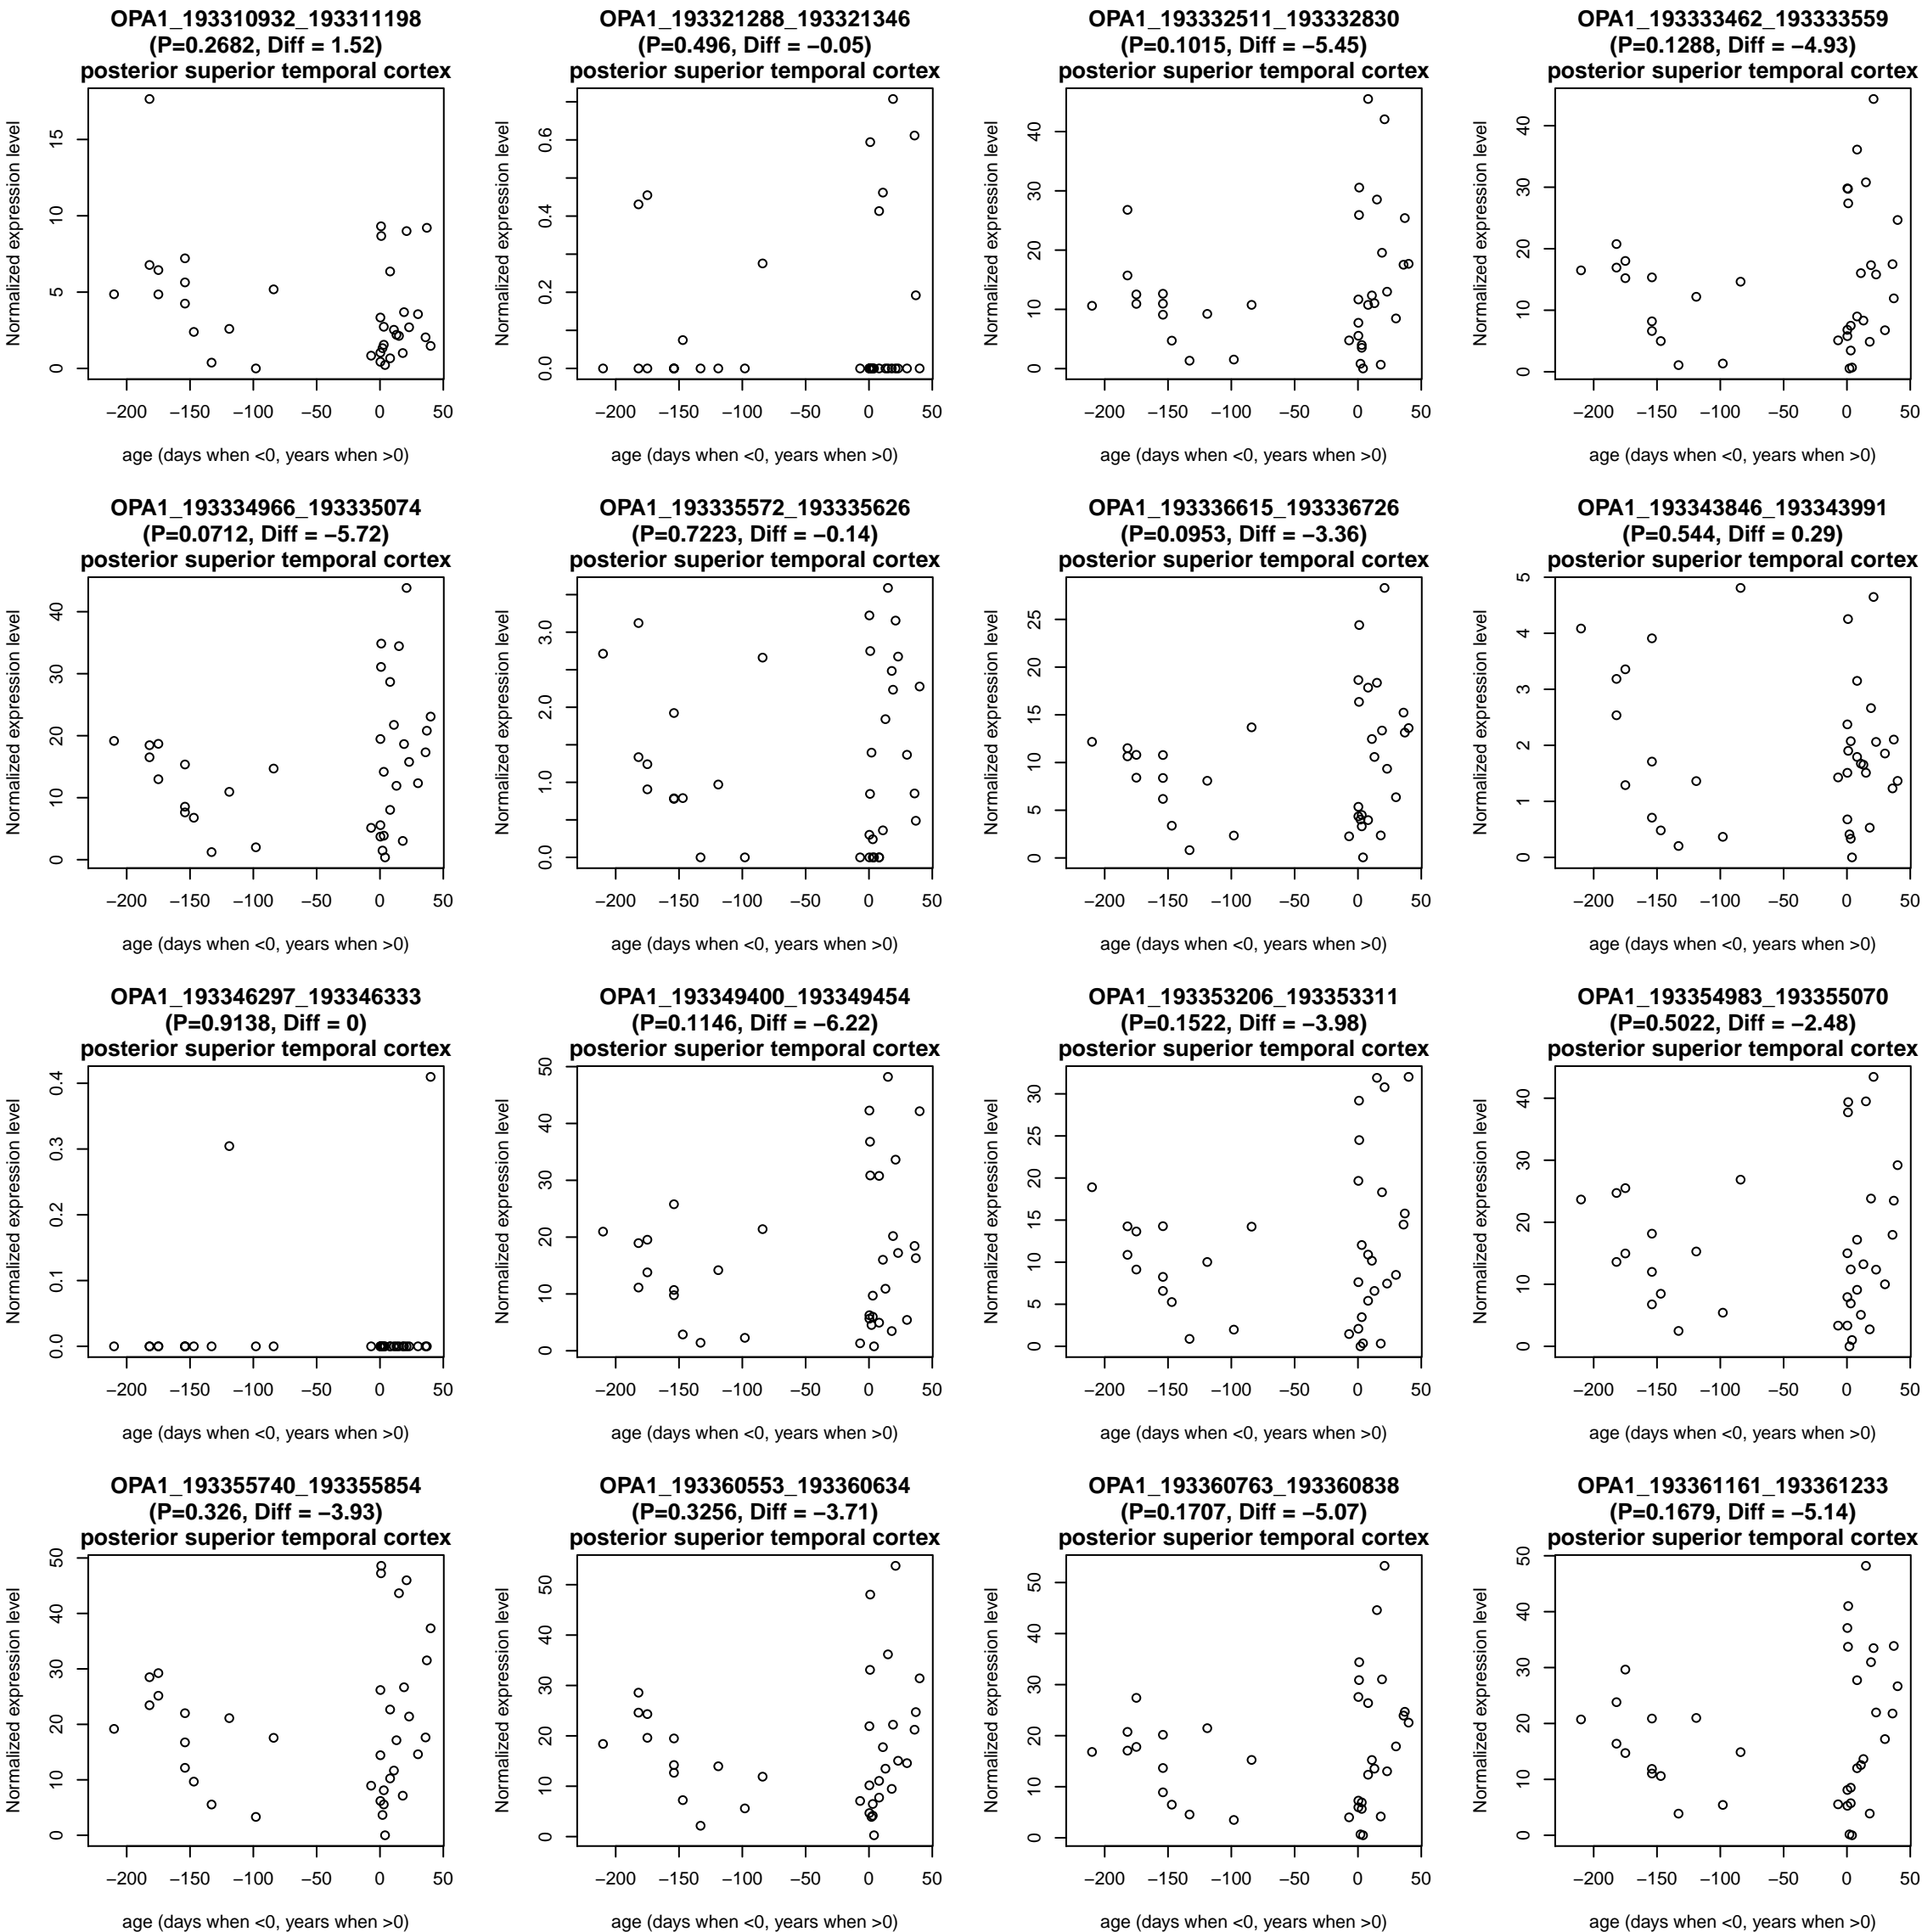

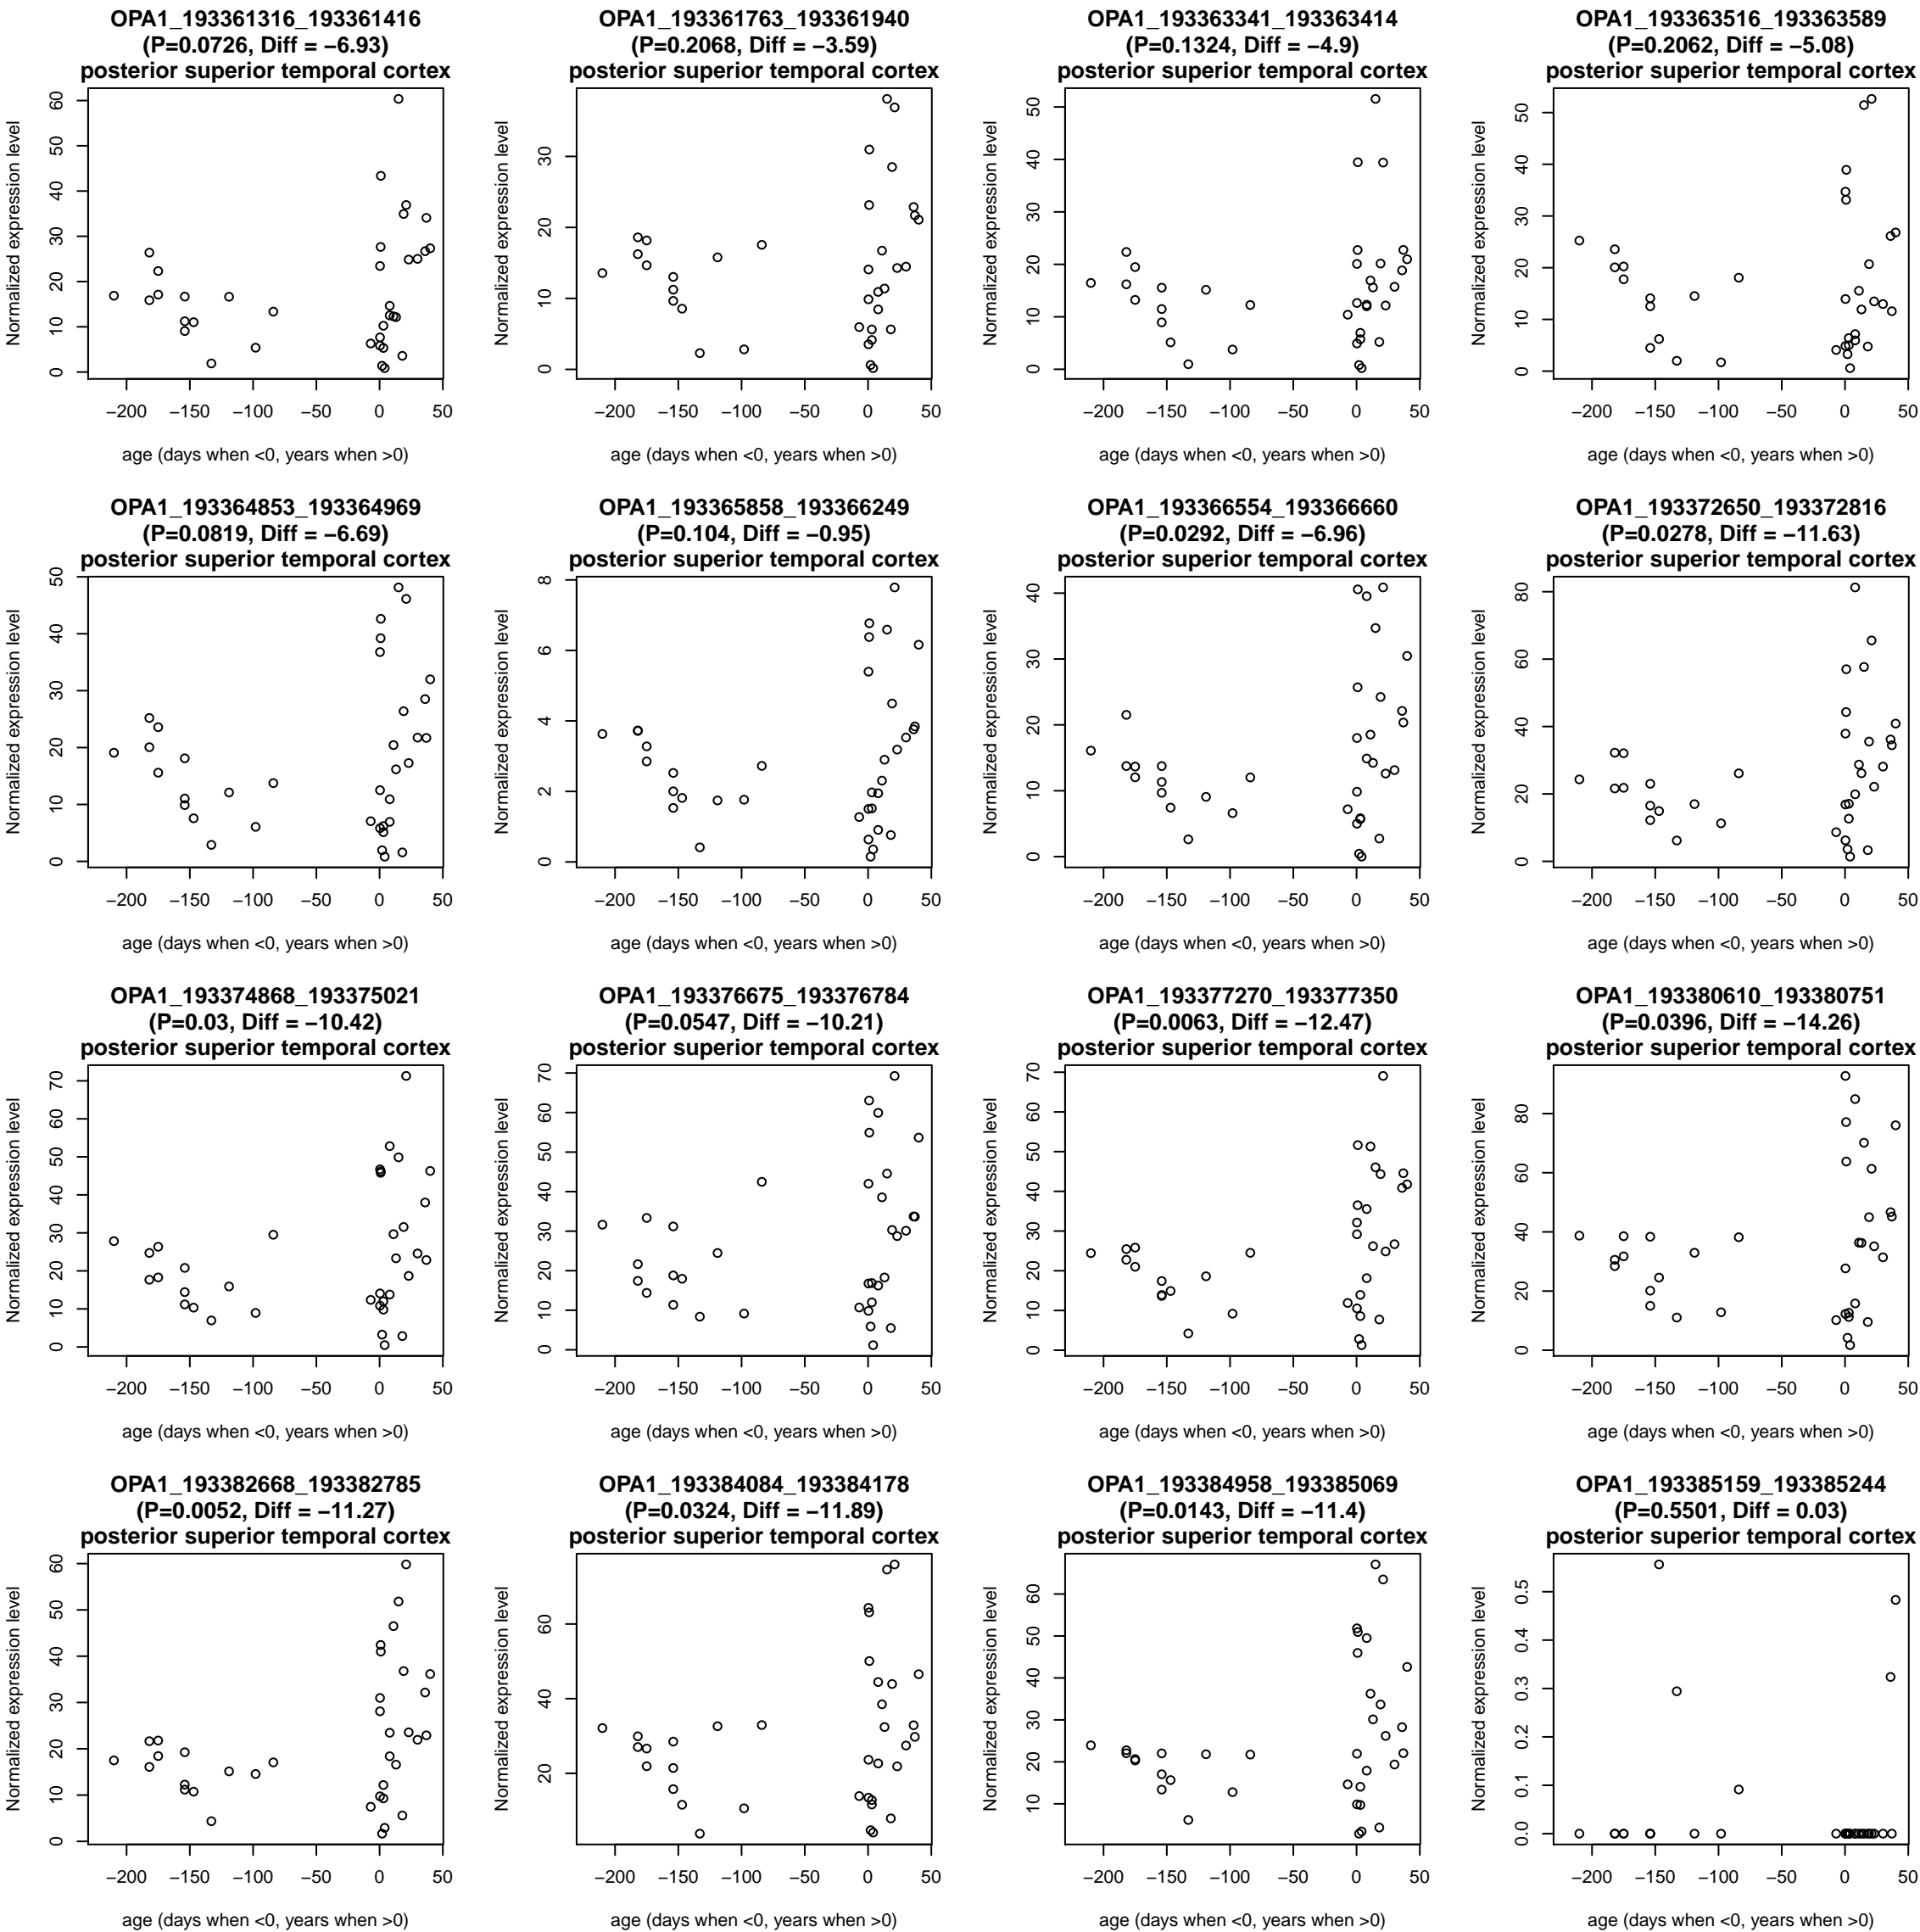

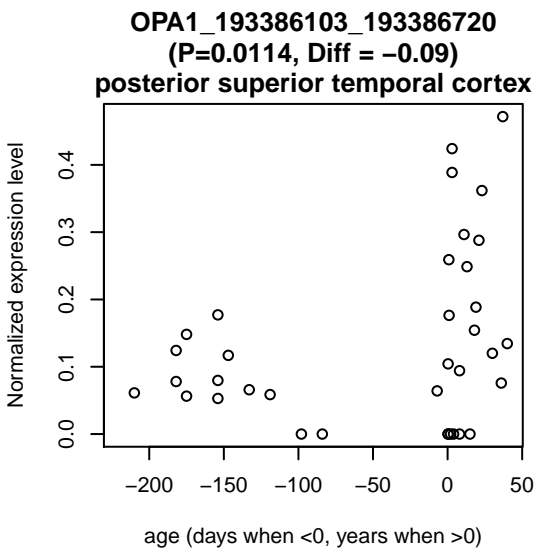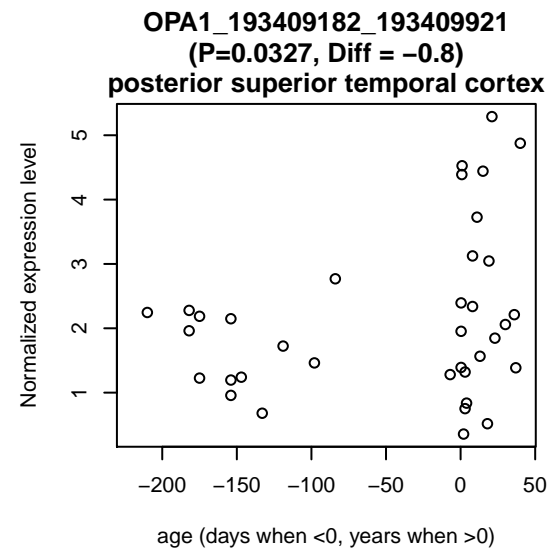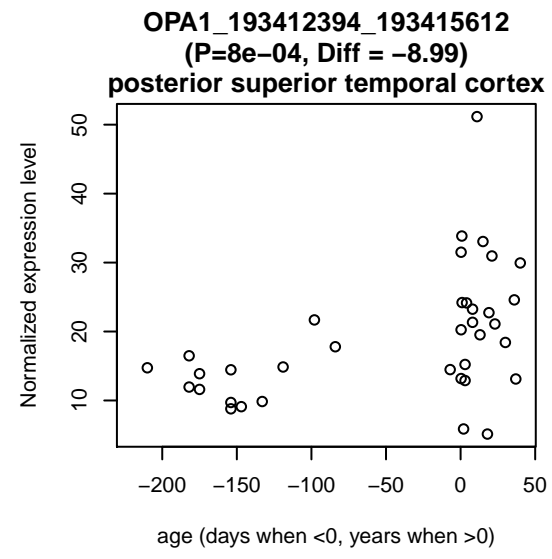



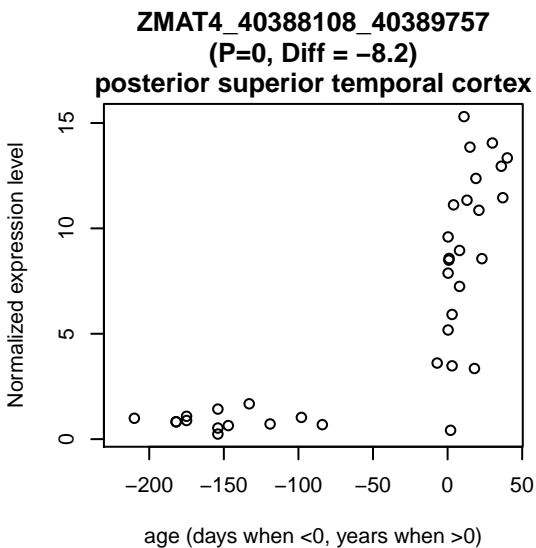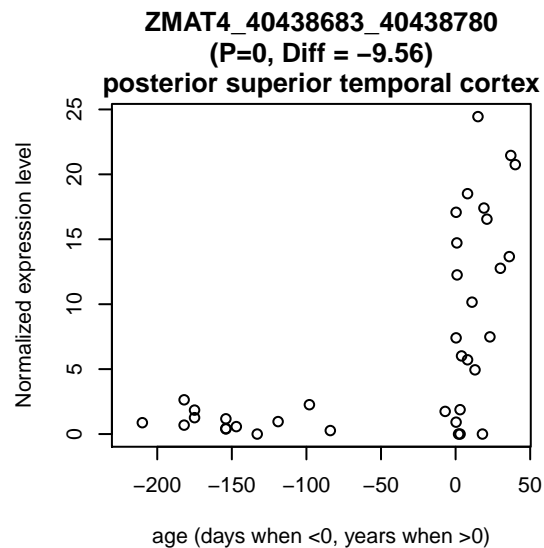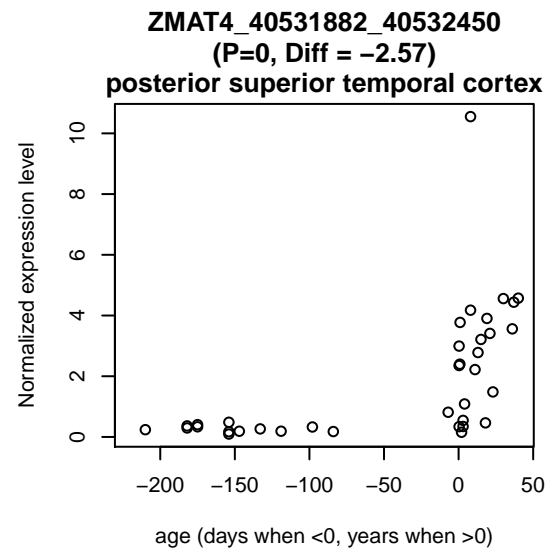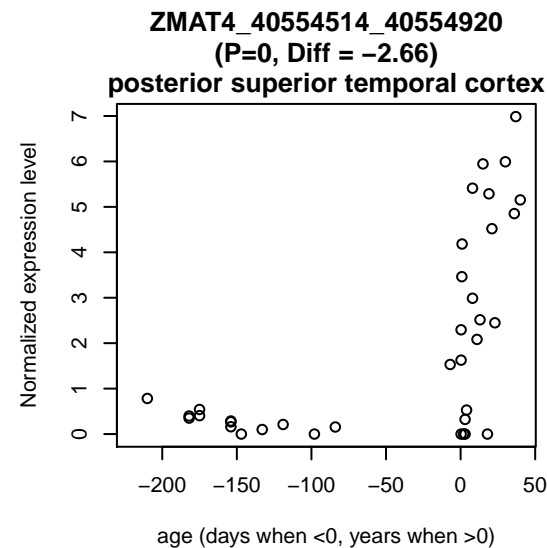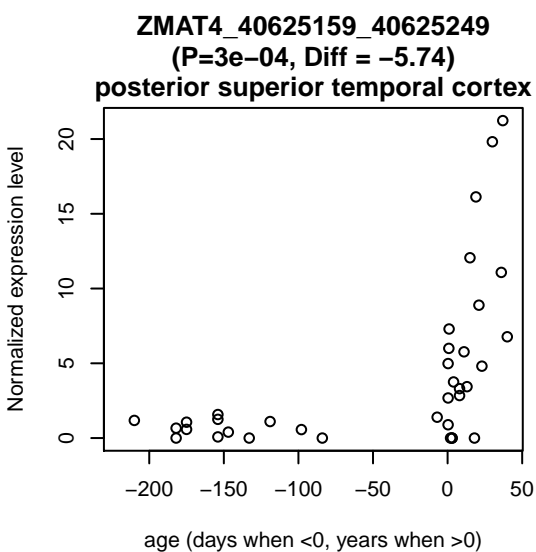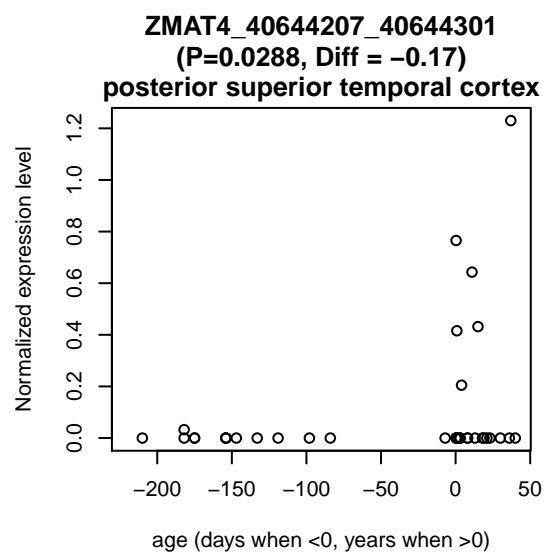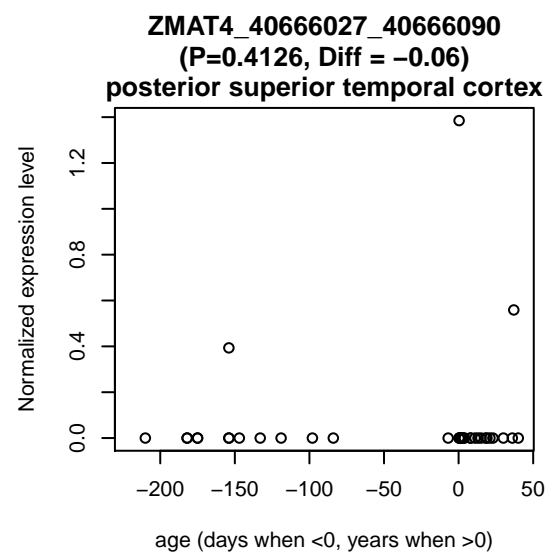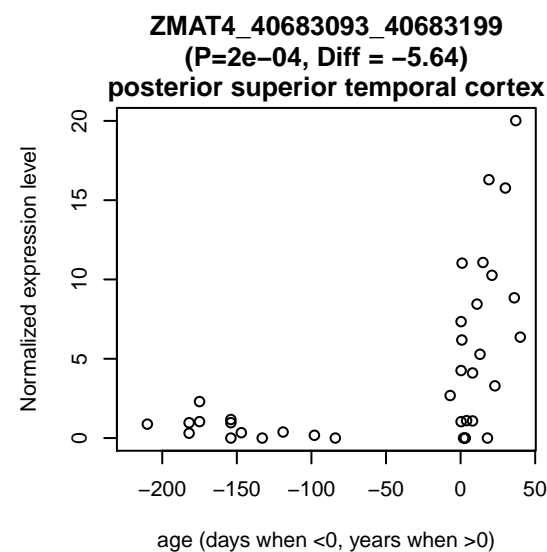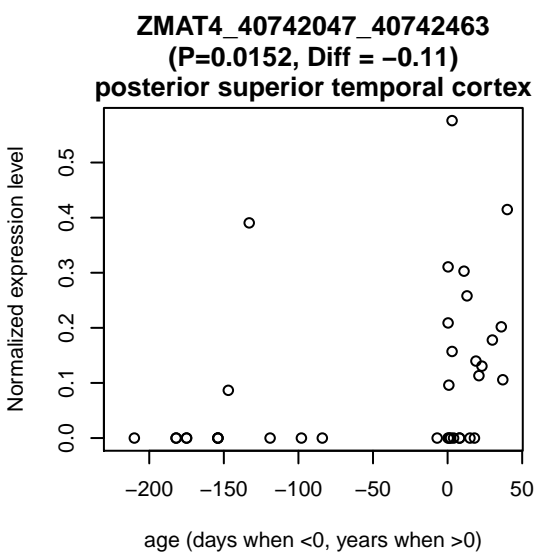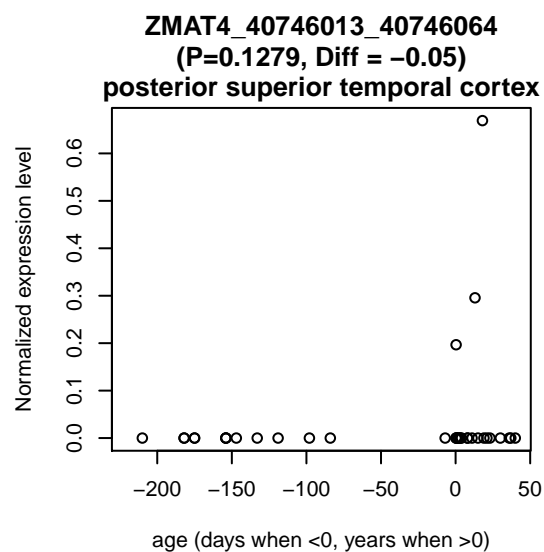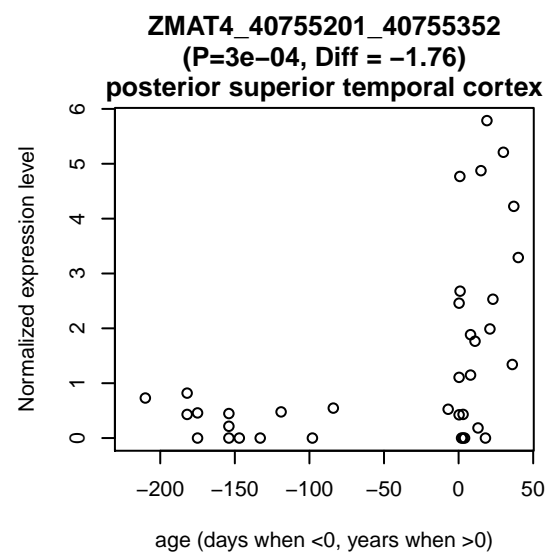

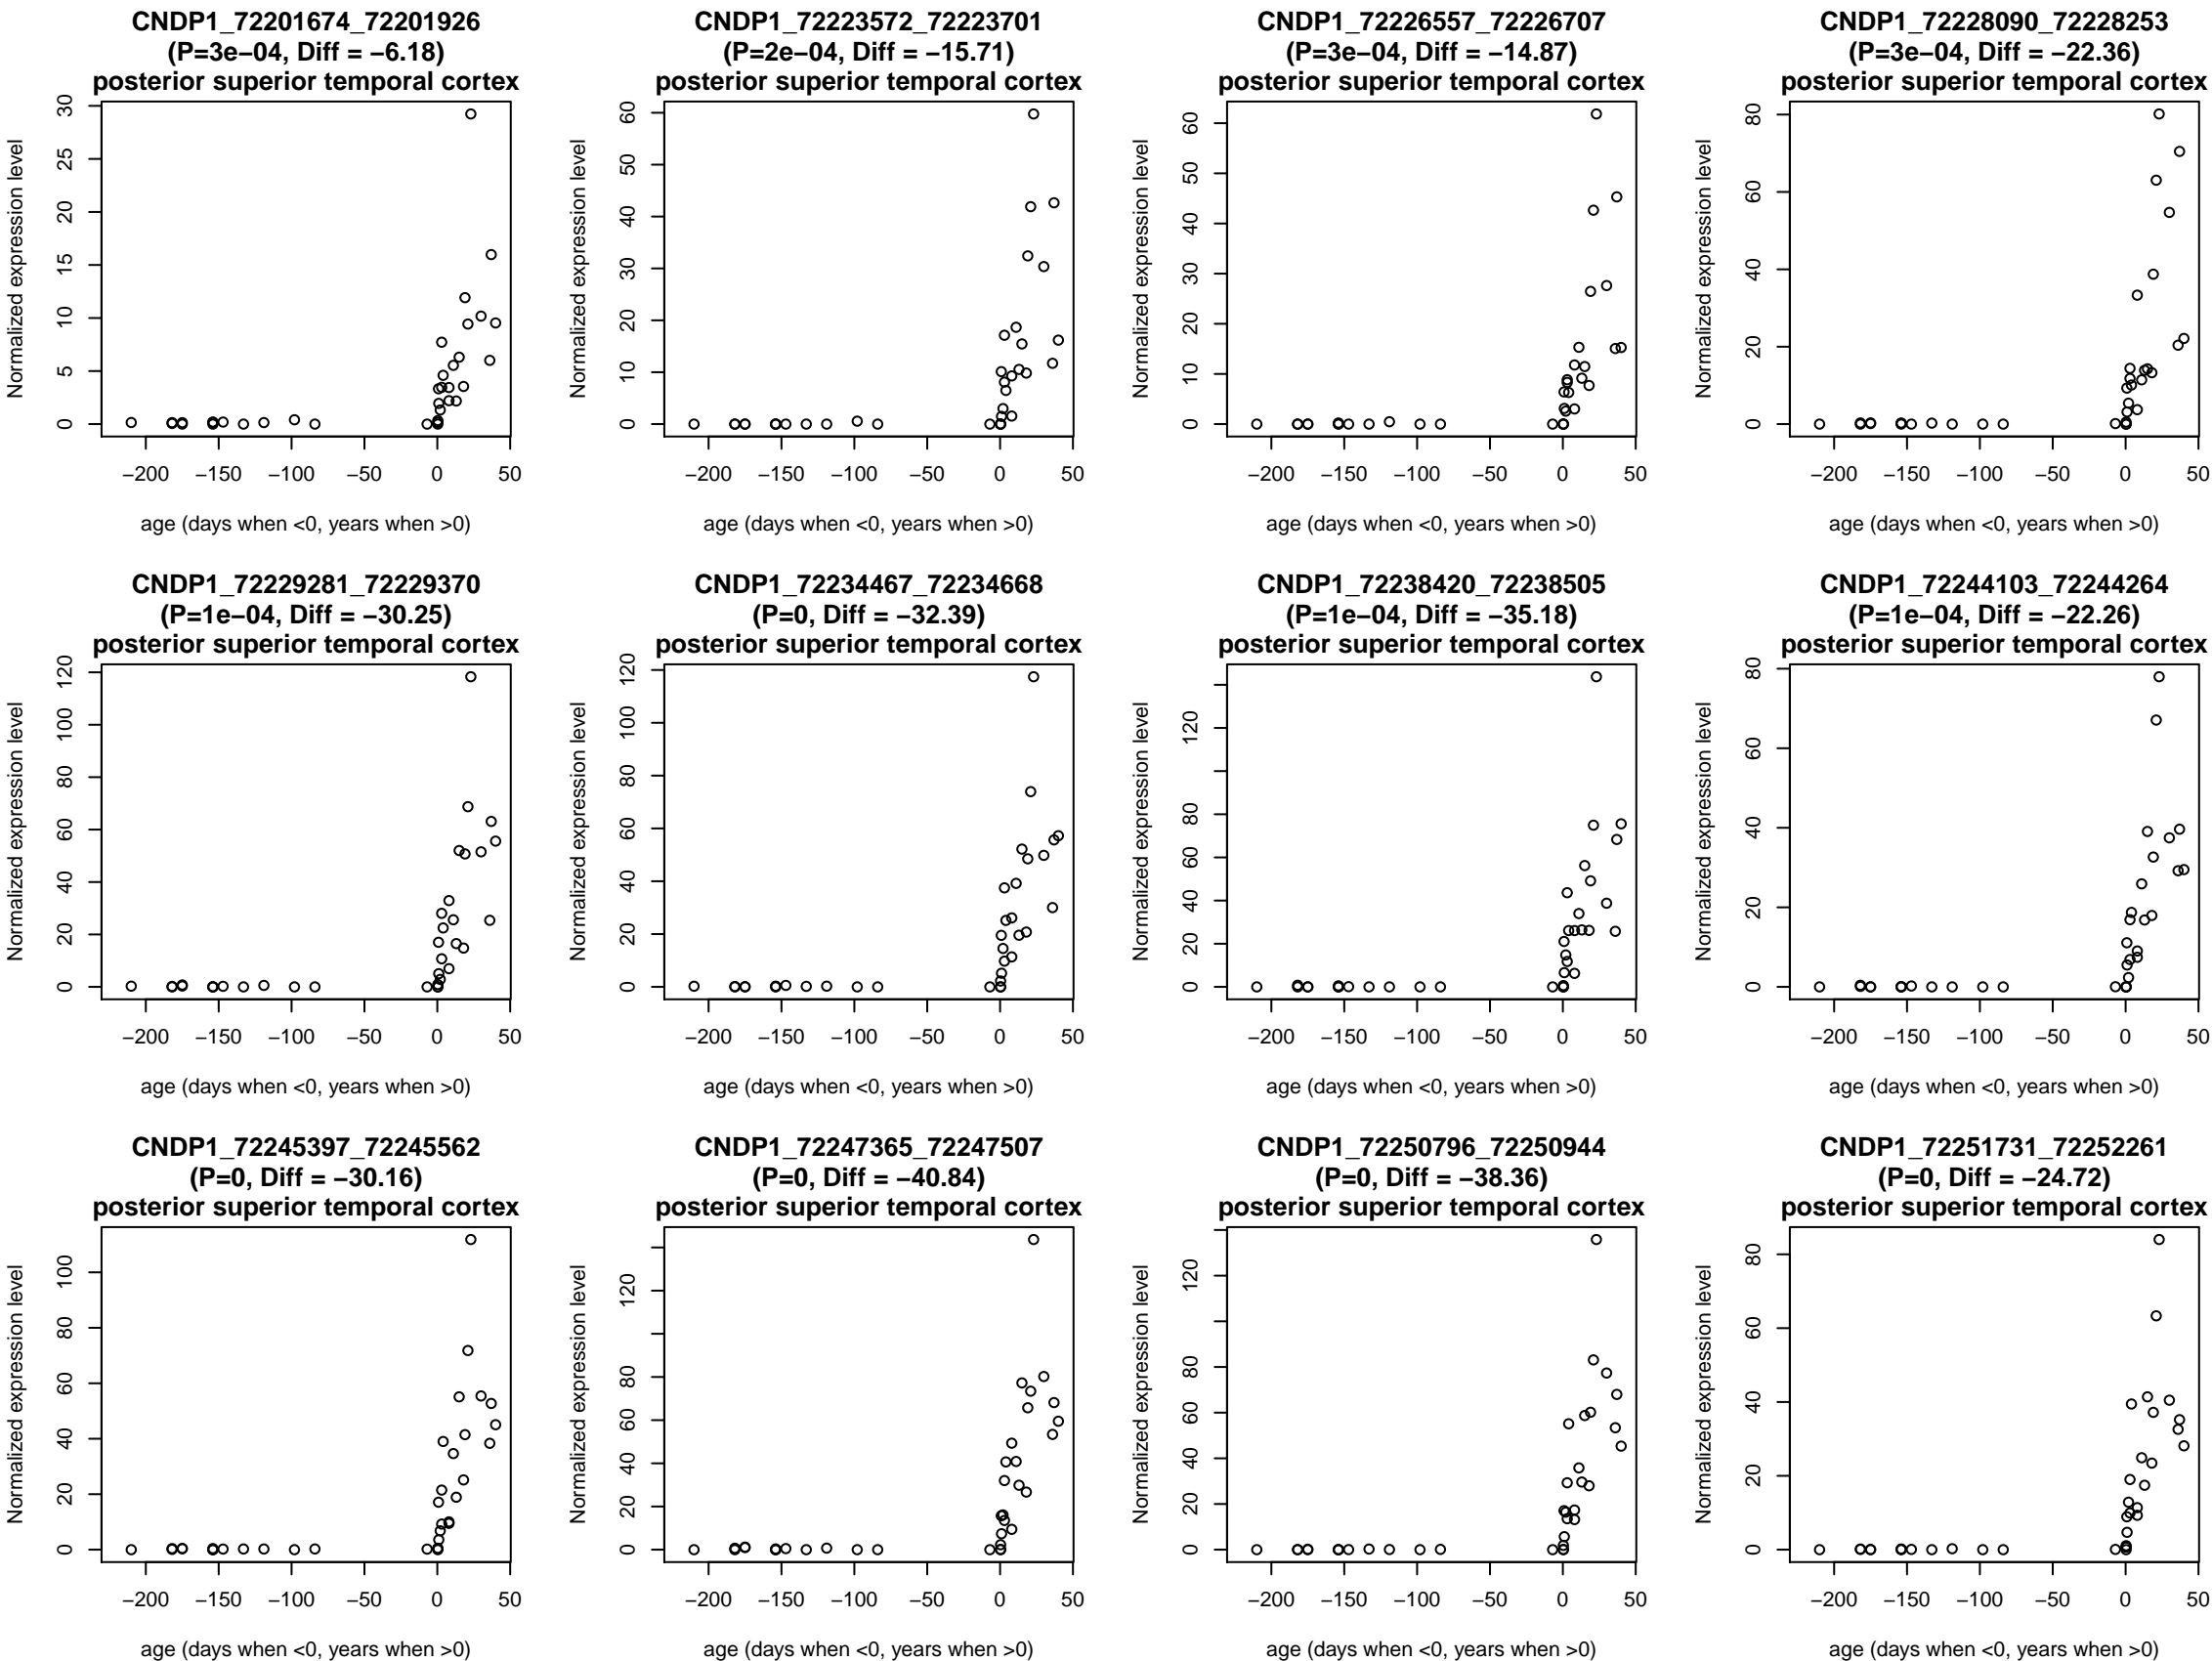

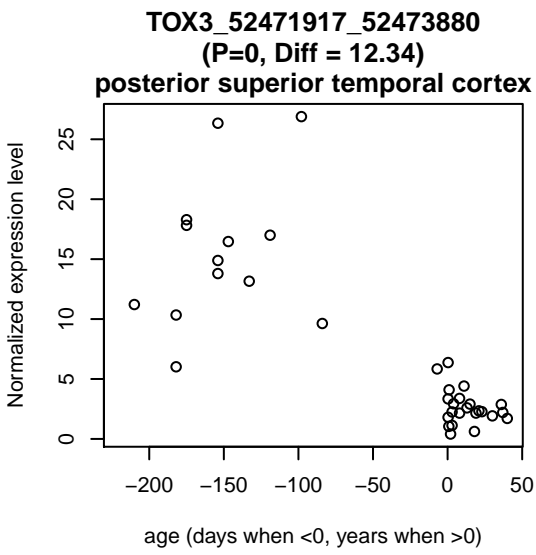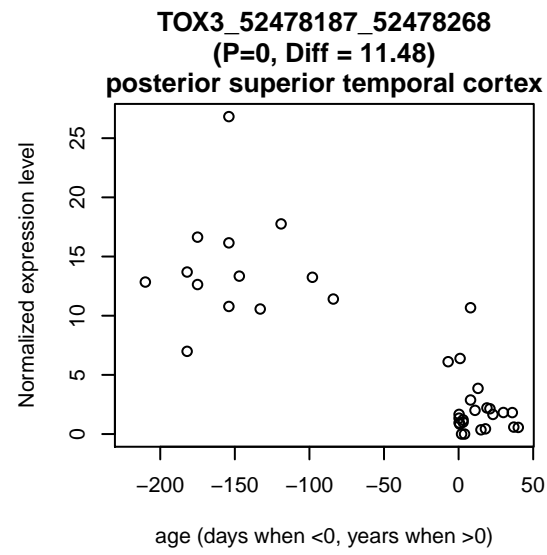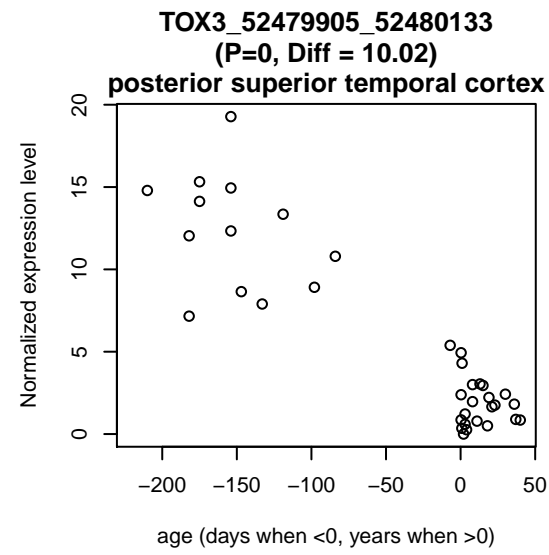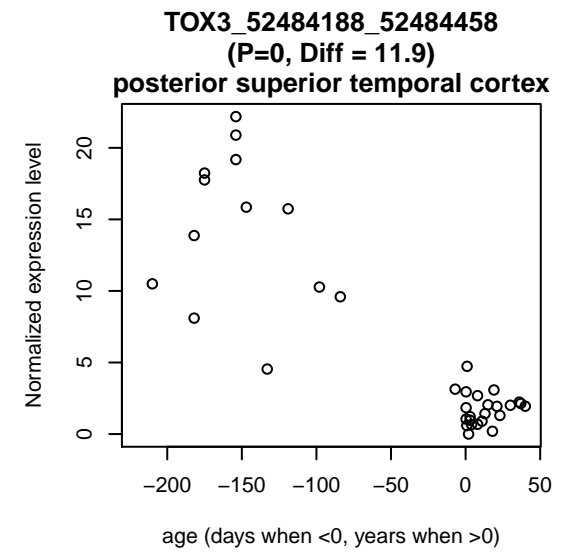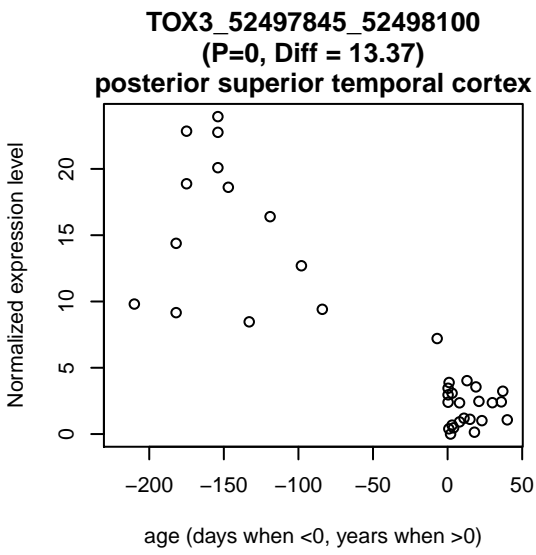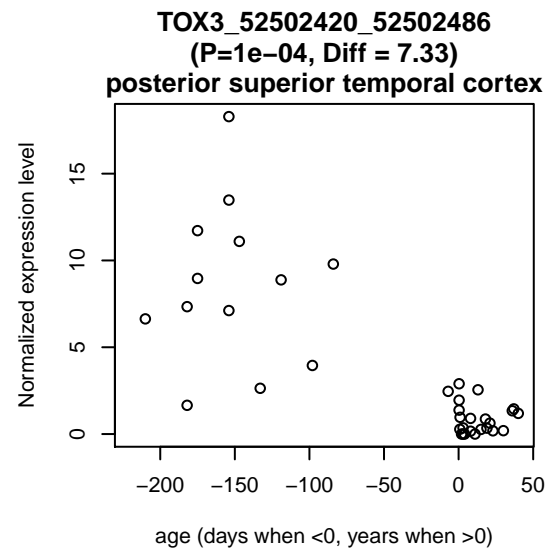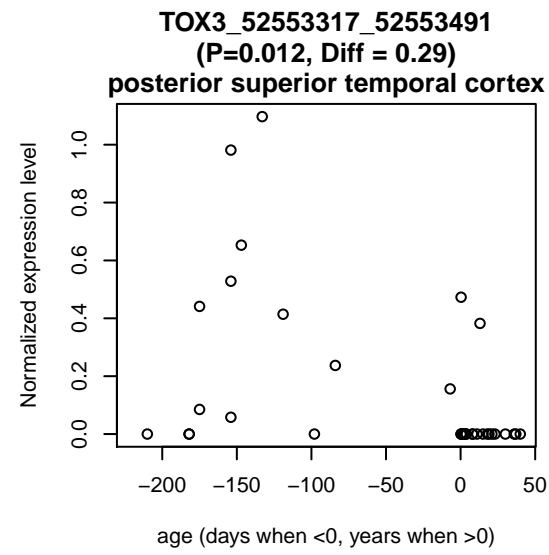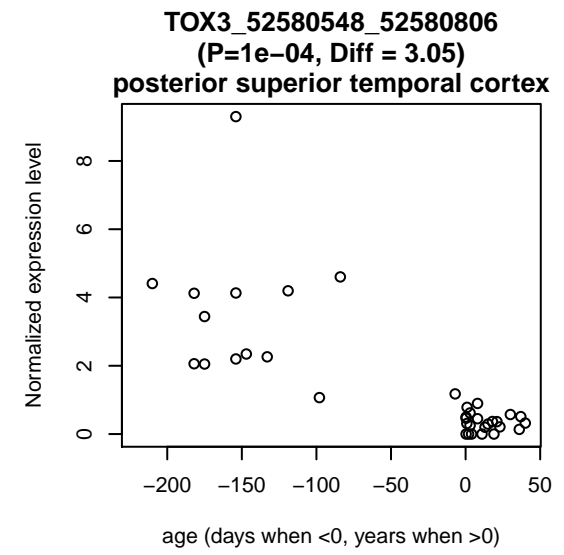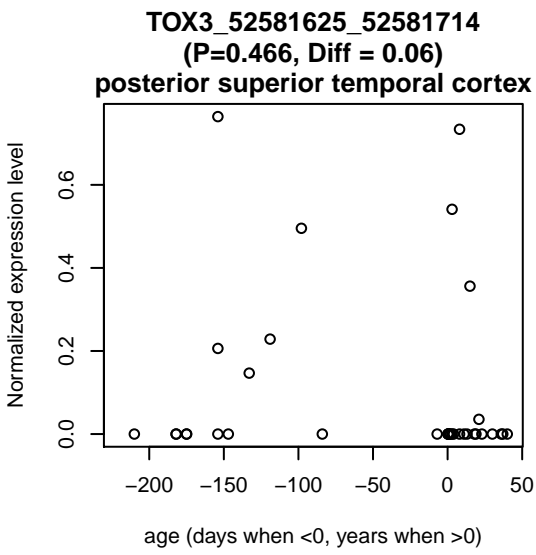

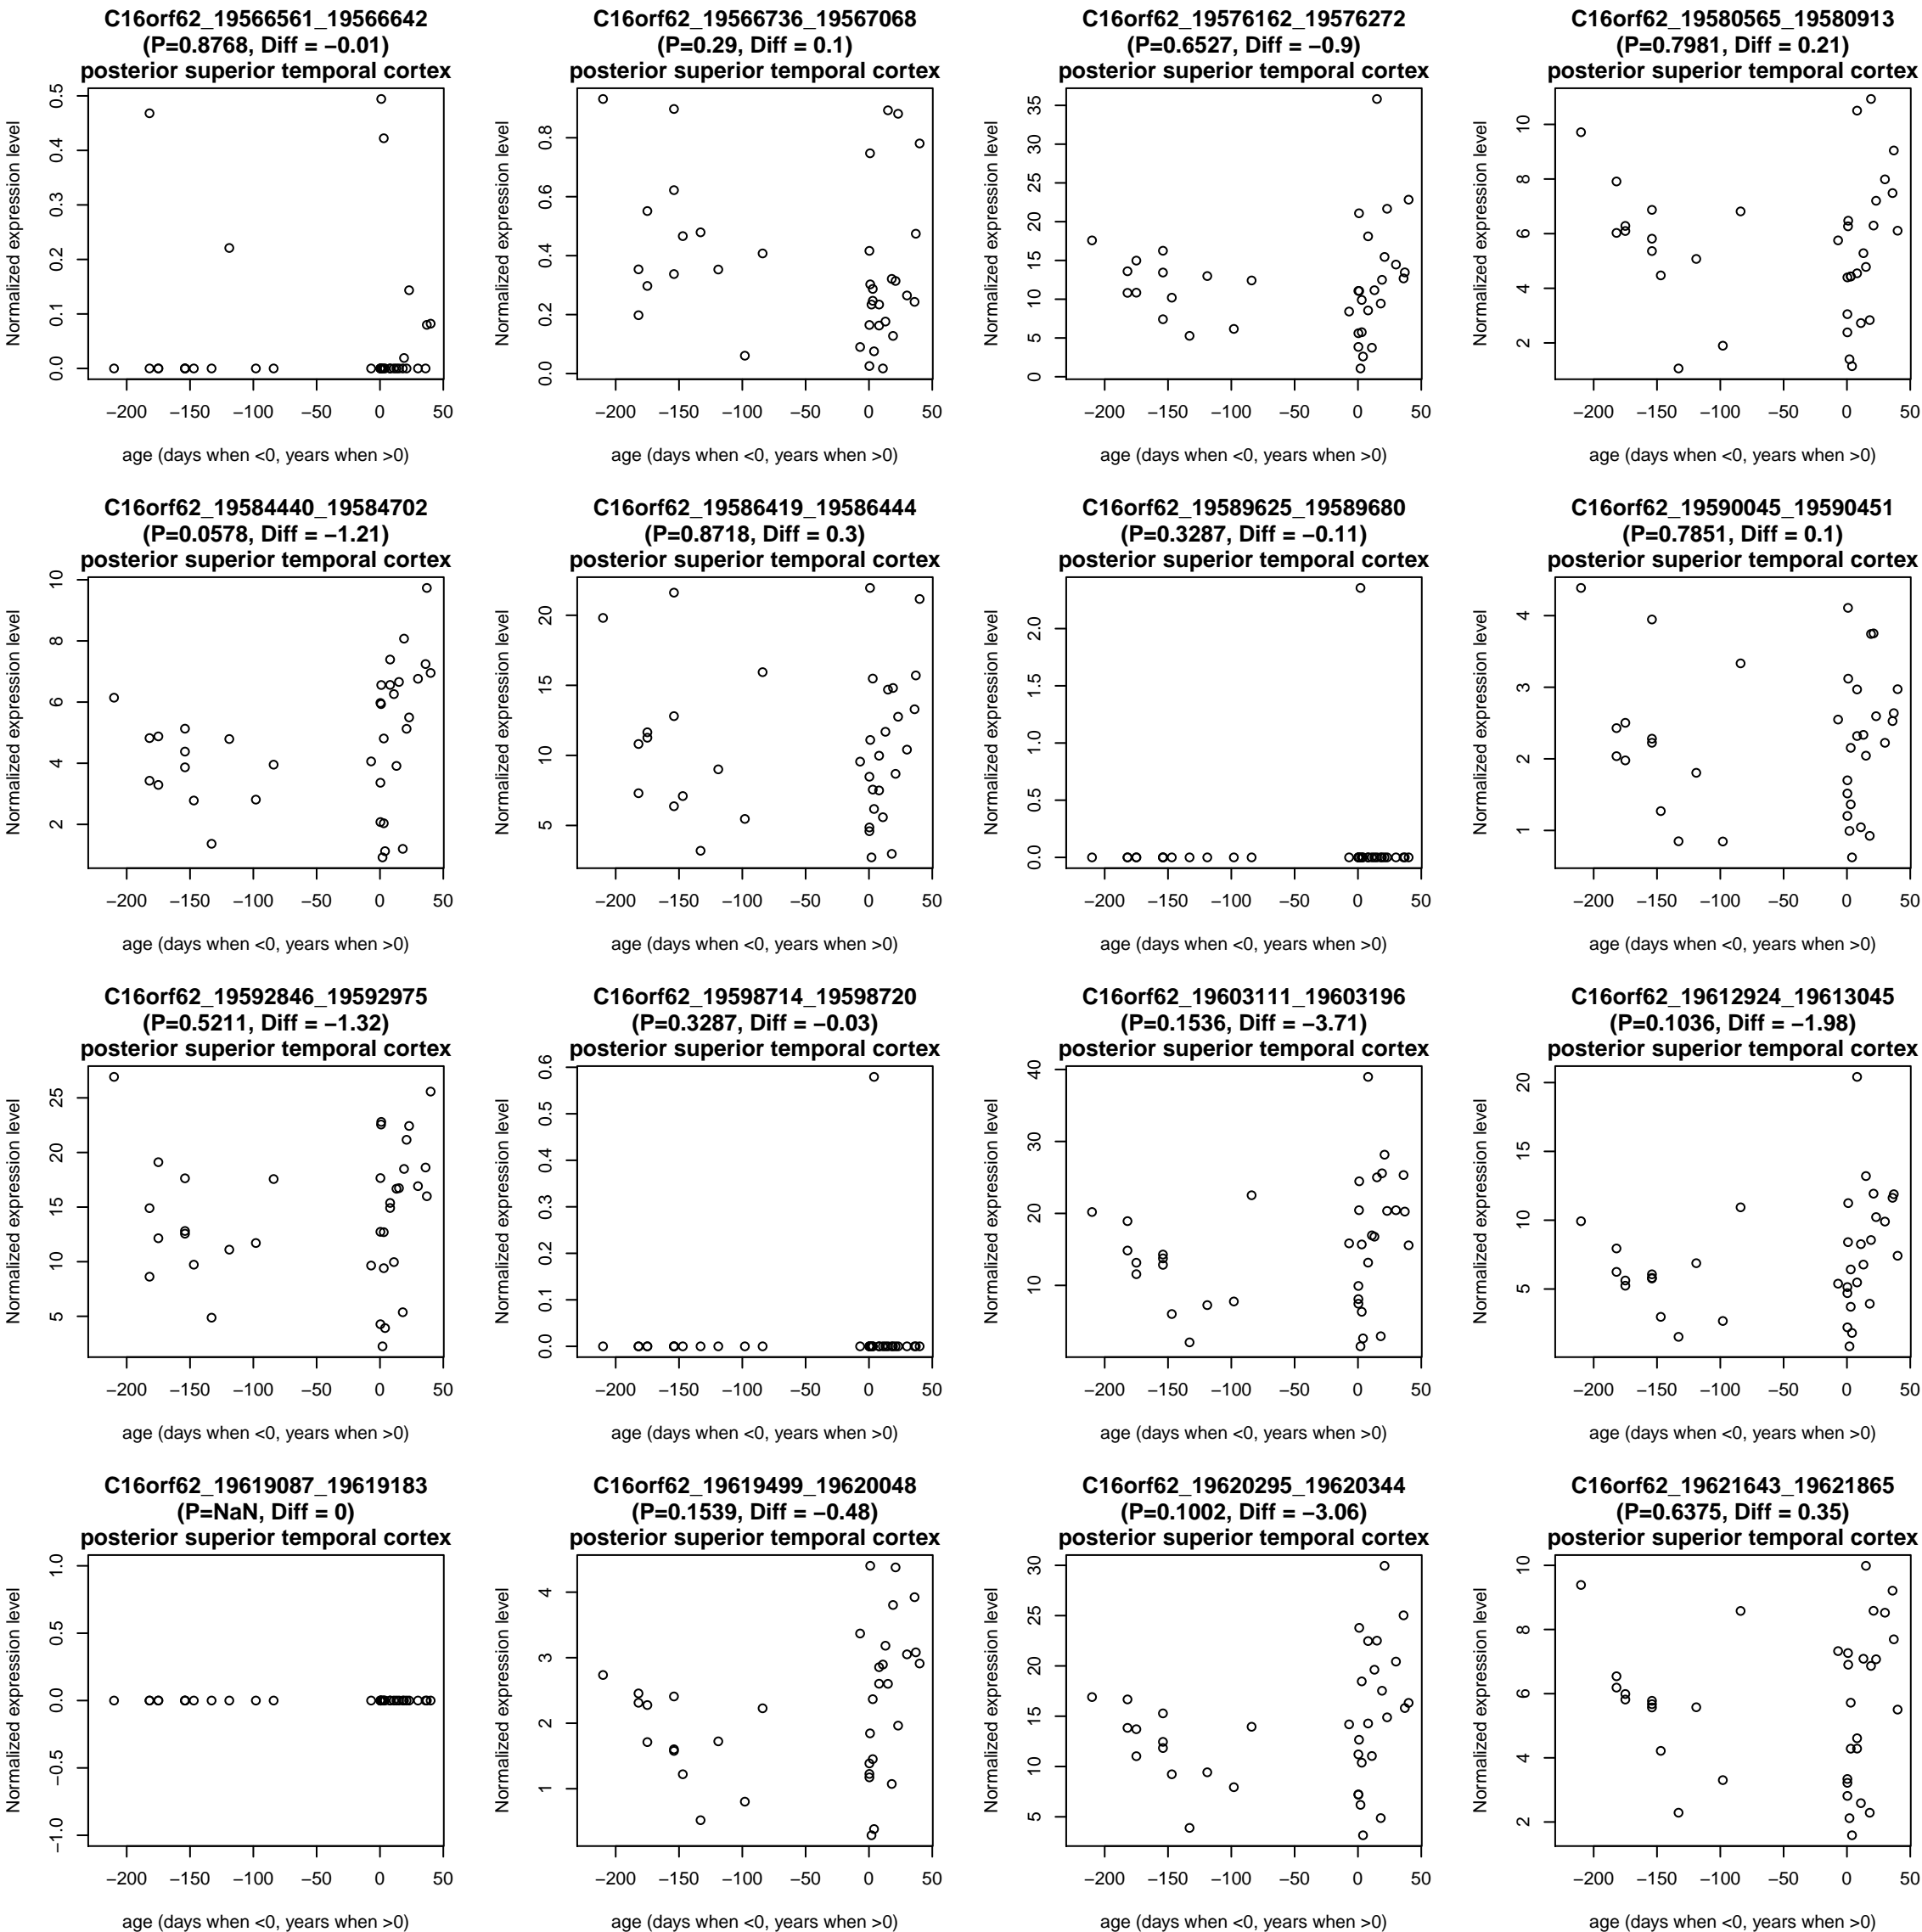

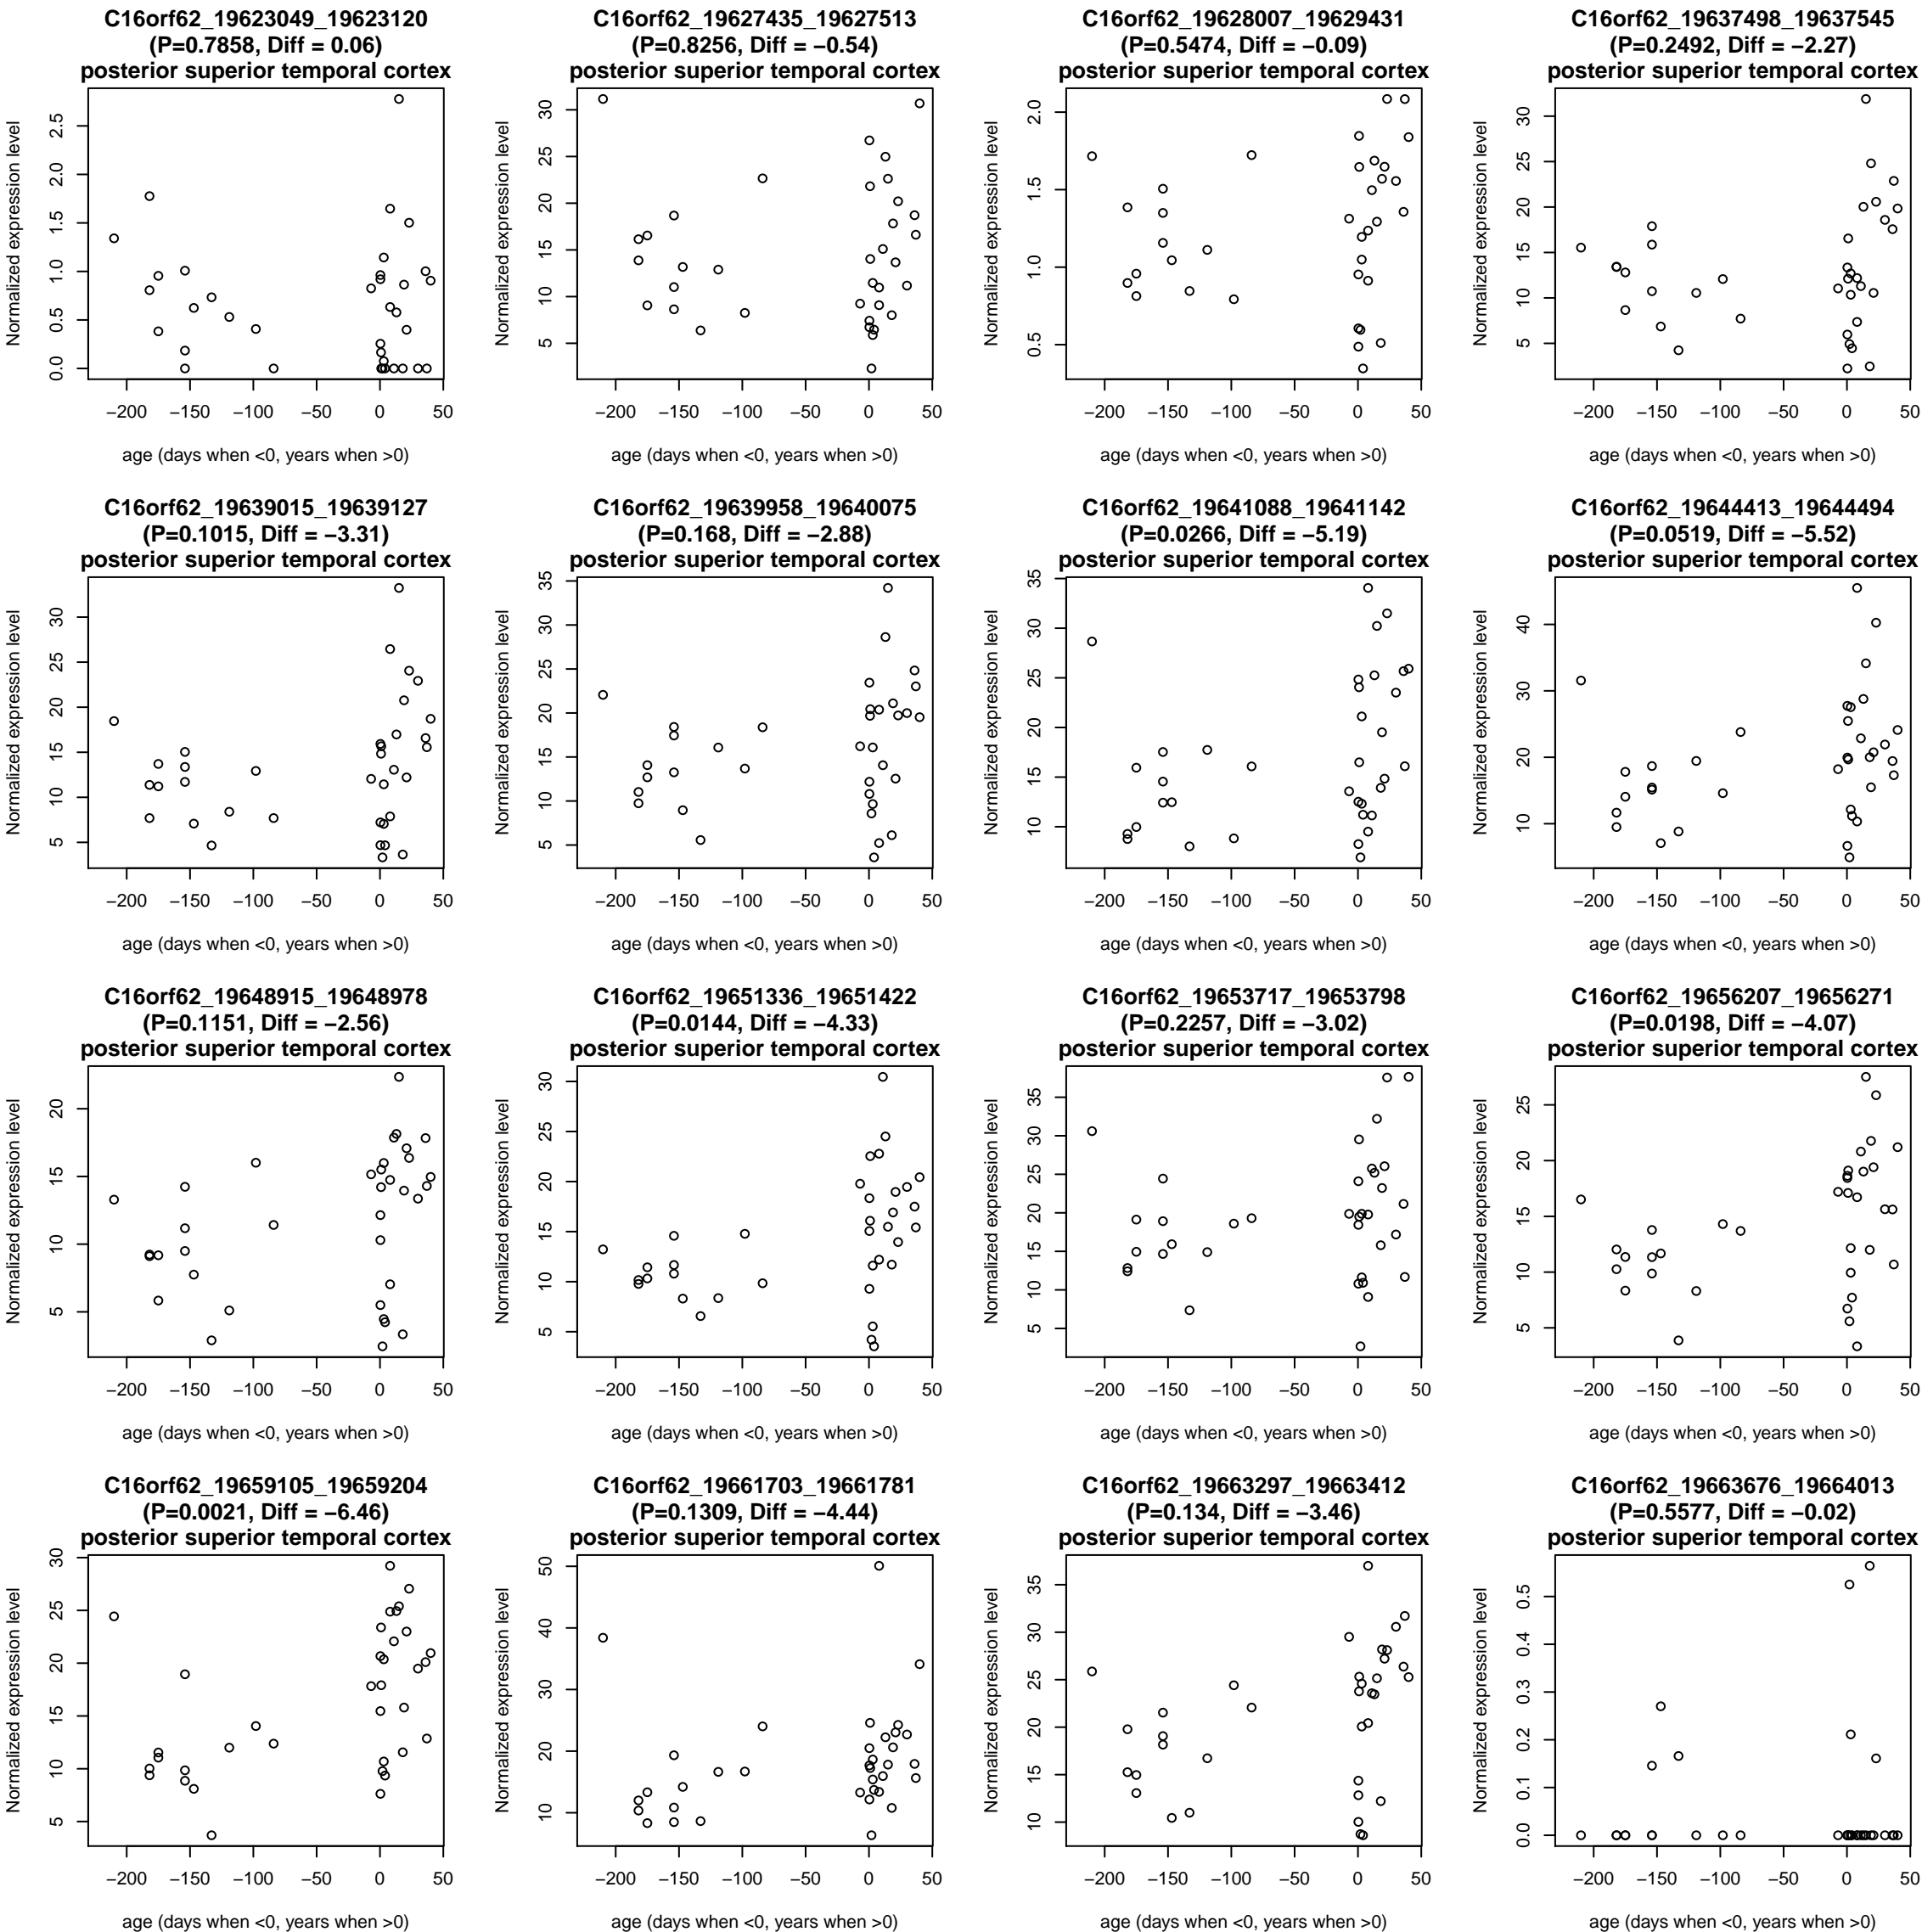

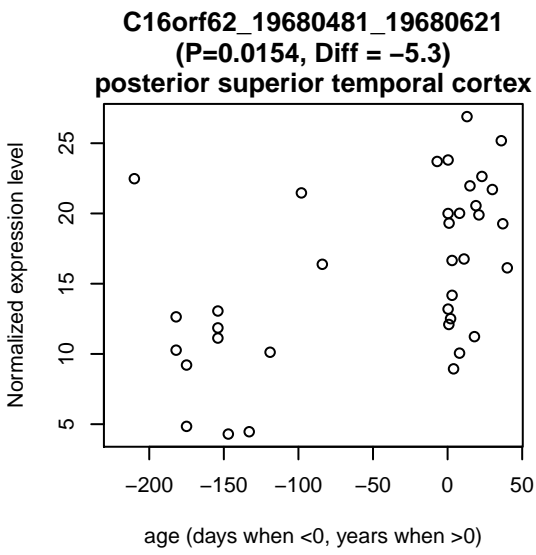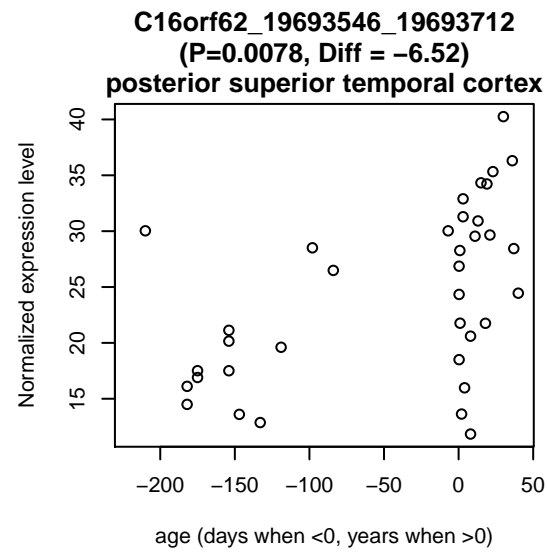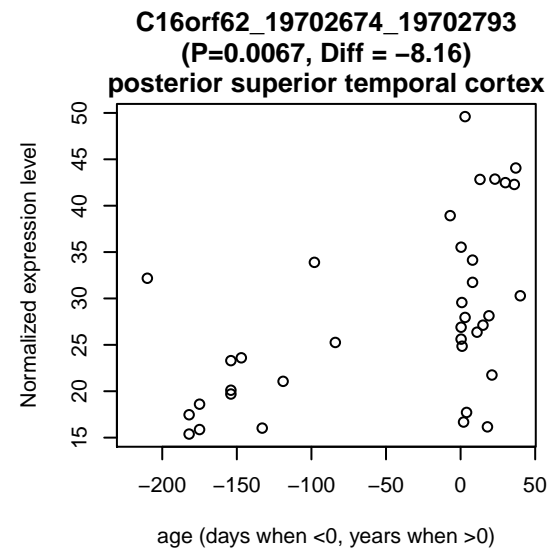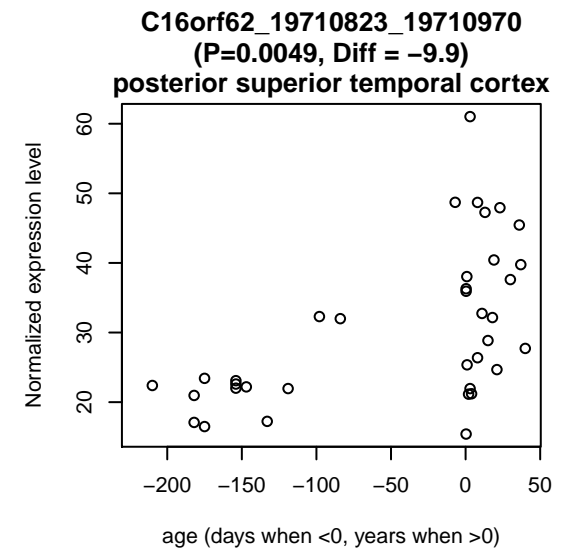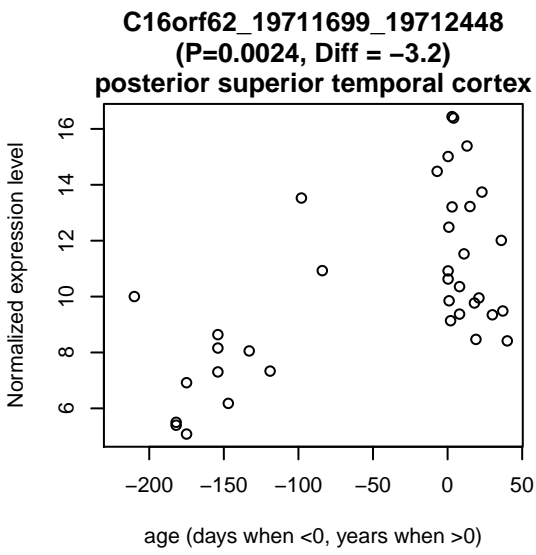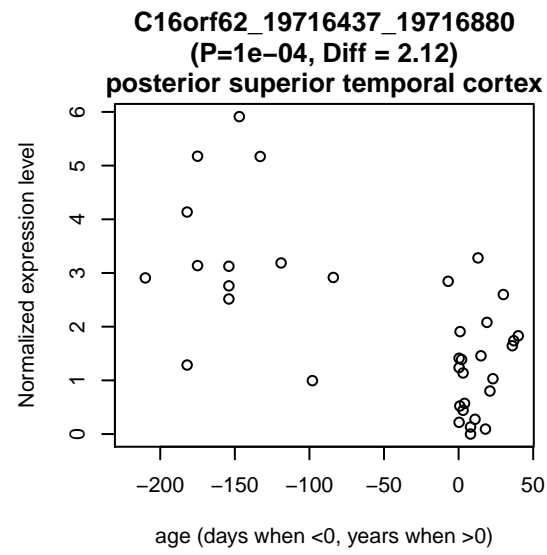

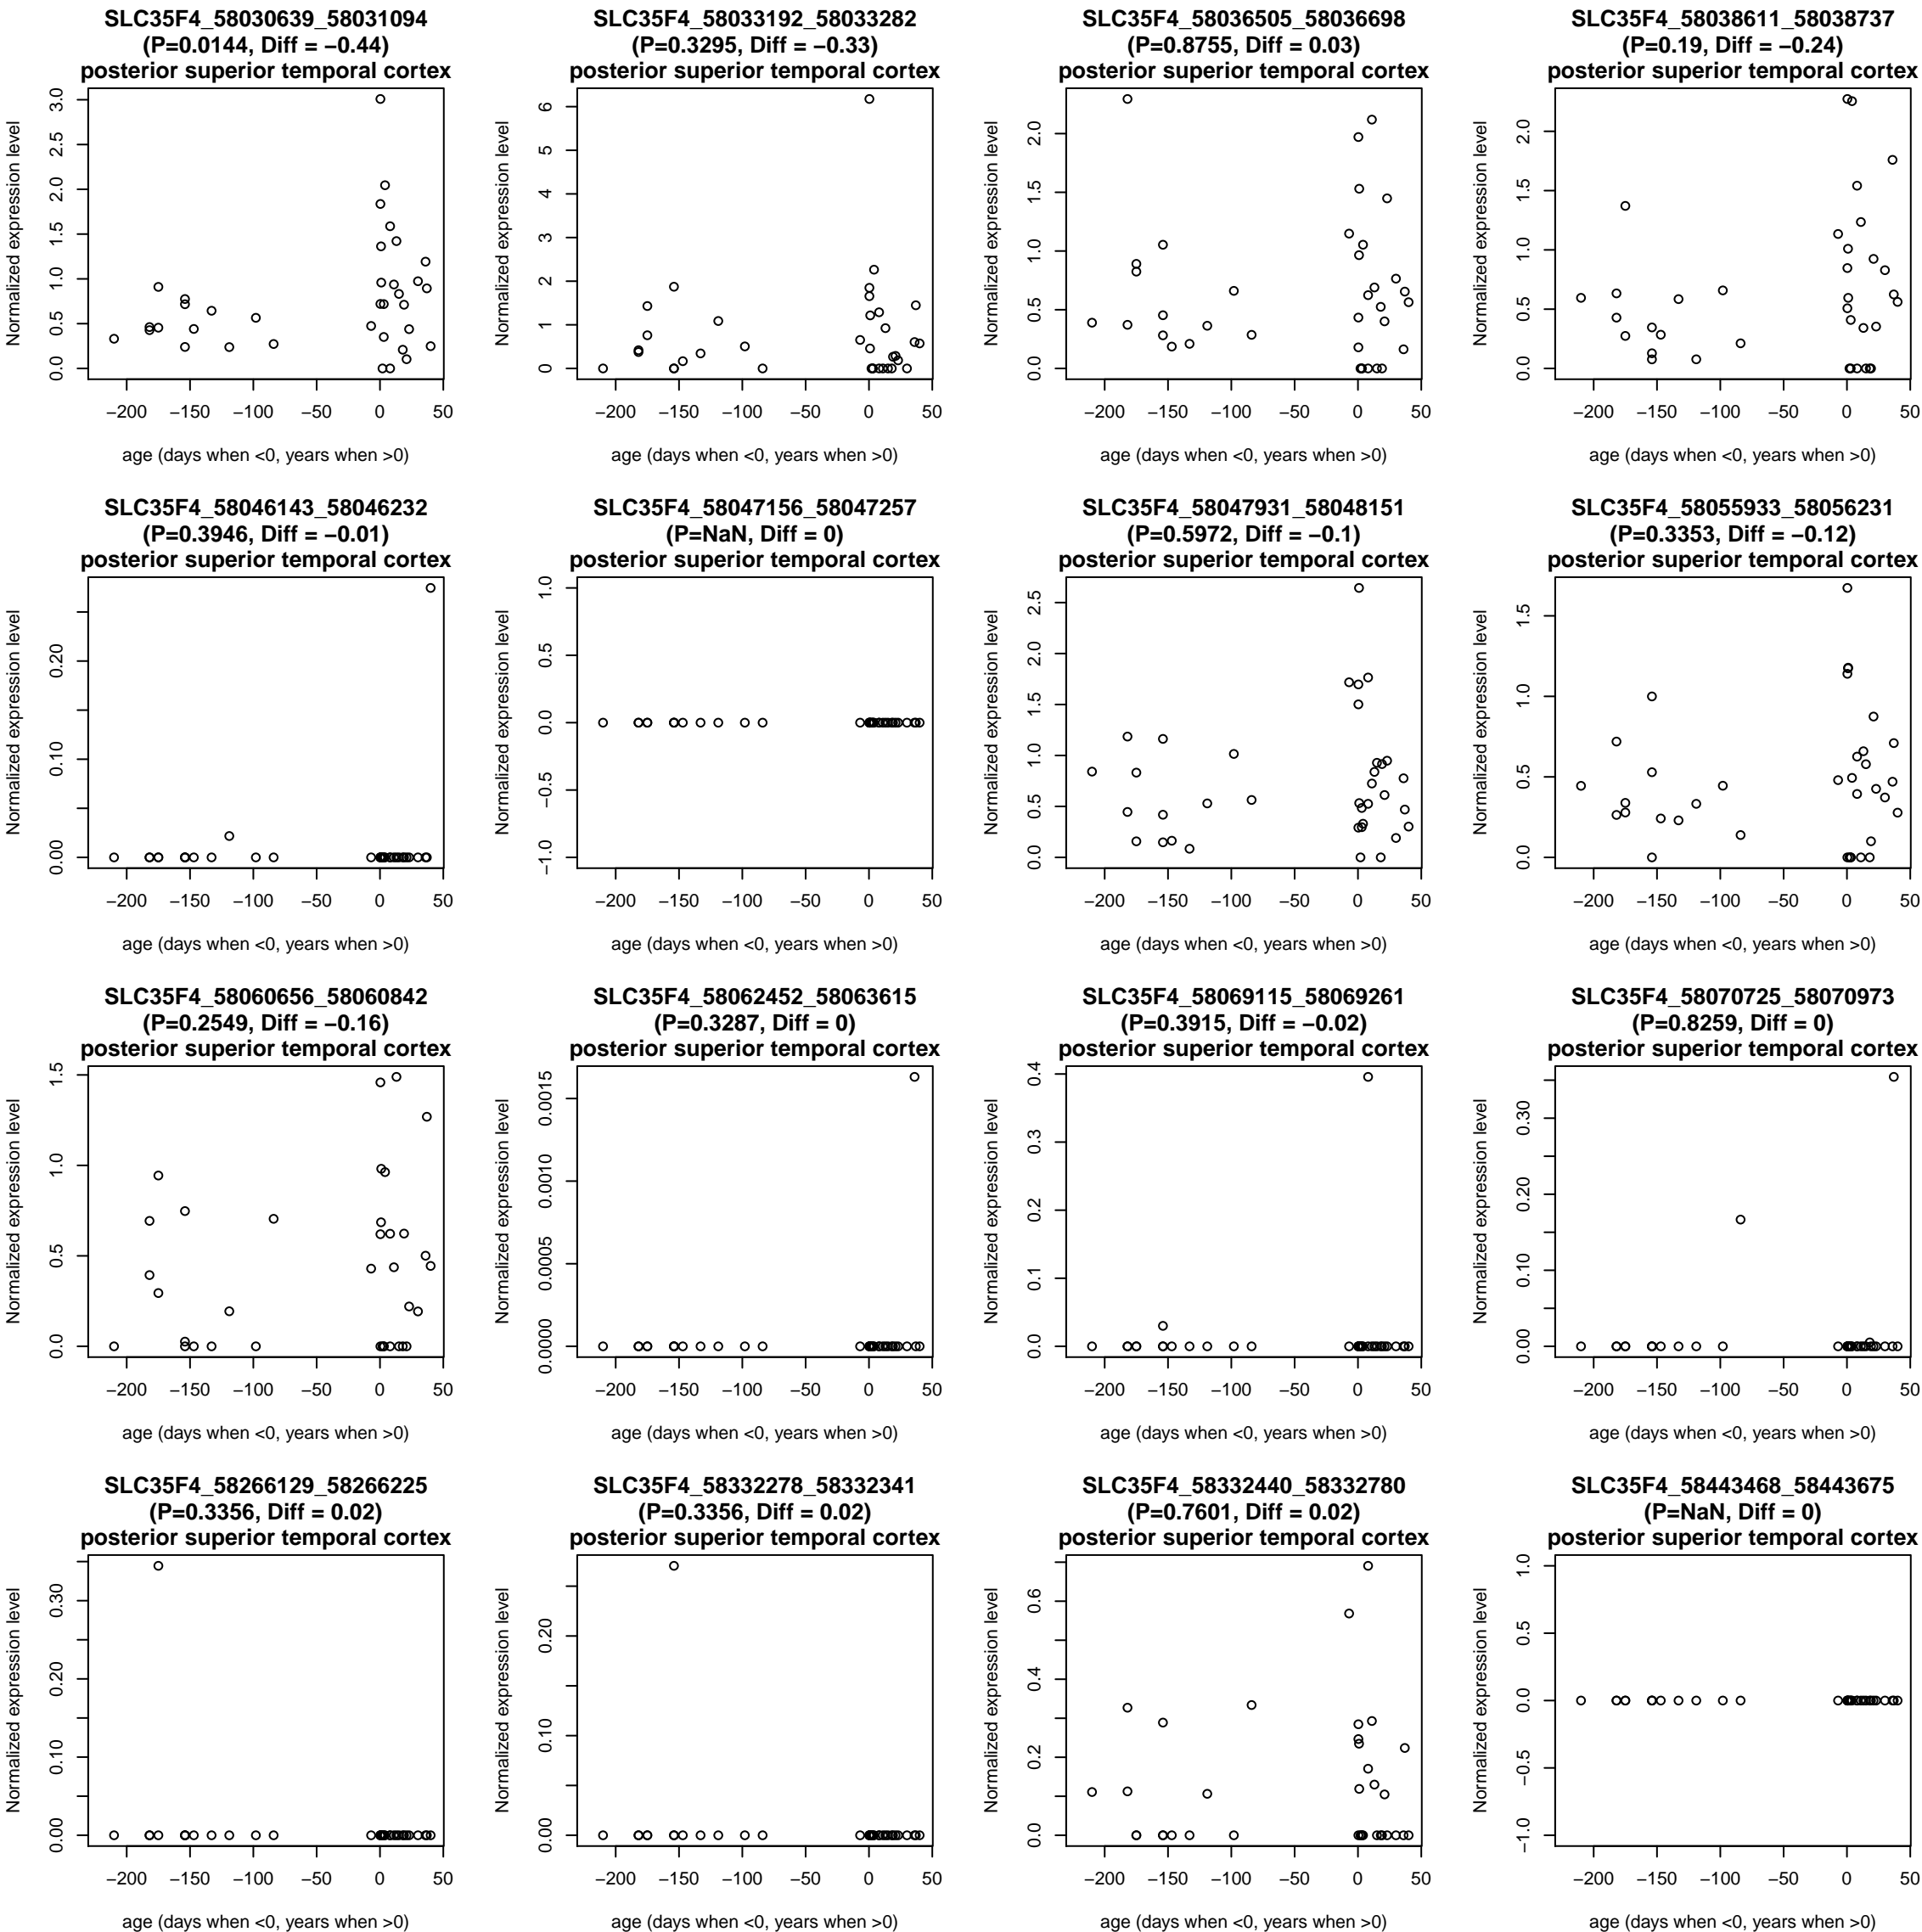

SLC35F4\_58448630\_58448912

(P=0.6691, Diff = -0.01)

posterior superior temporal cortex

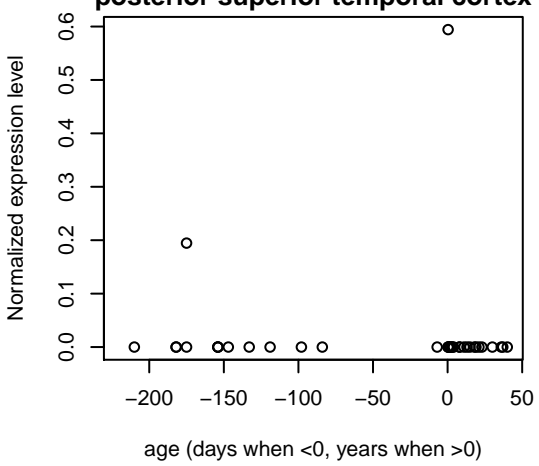



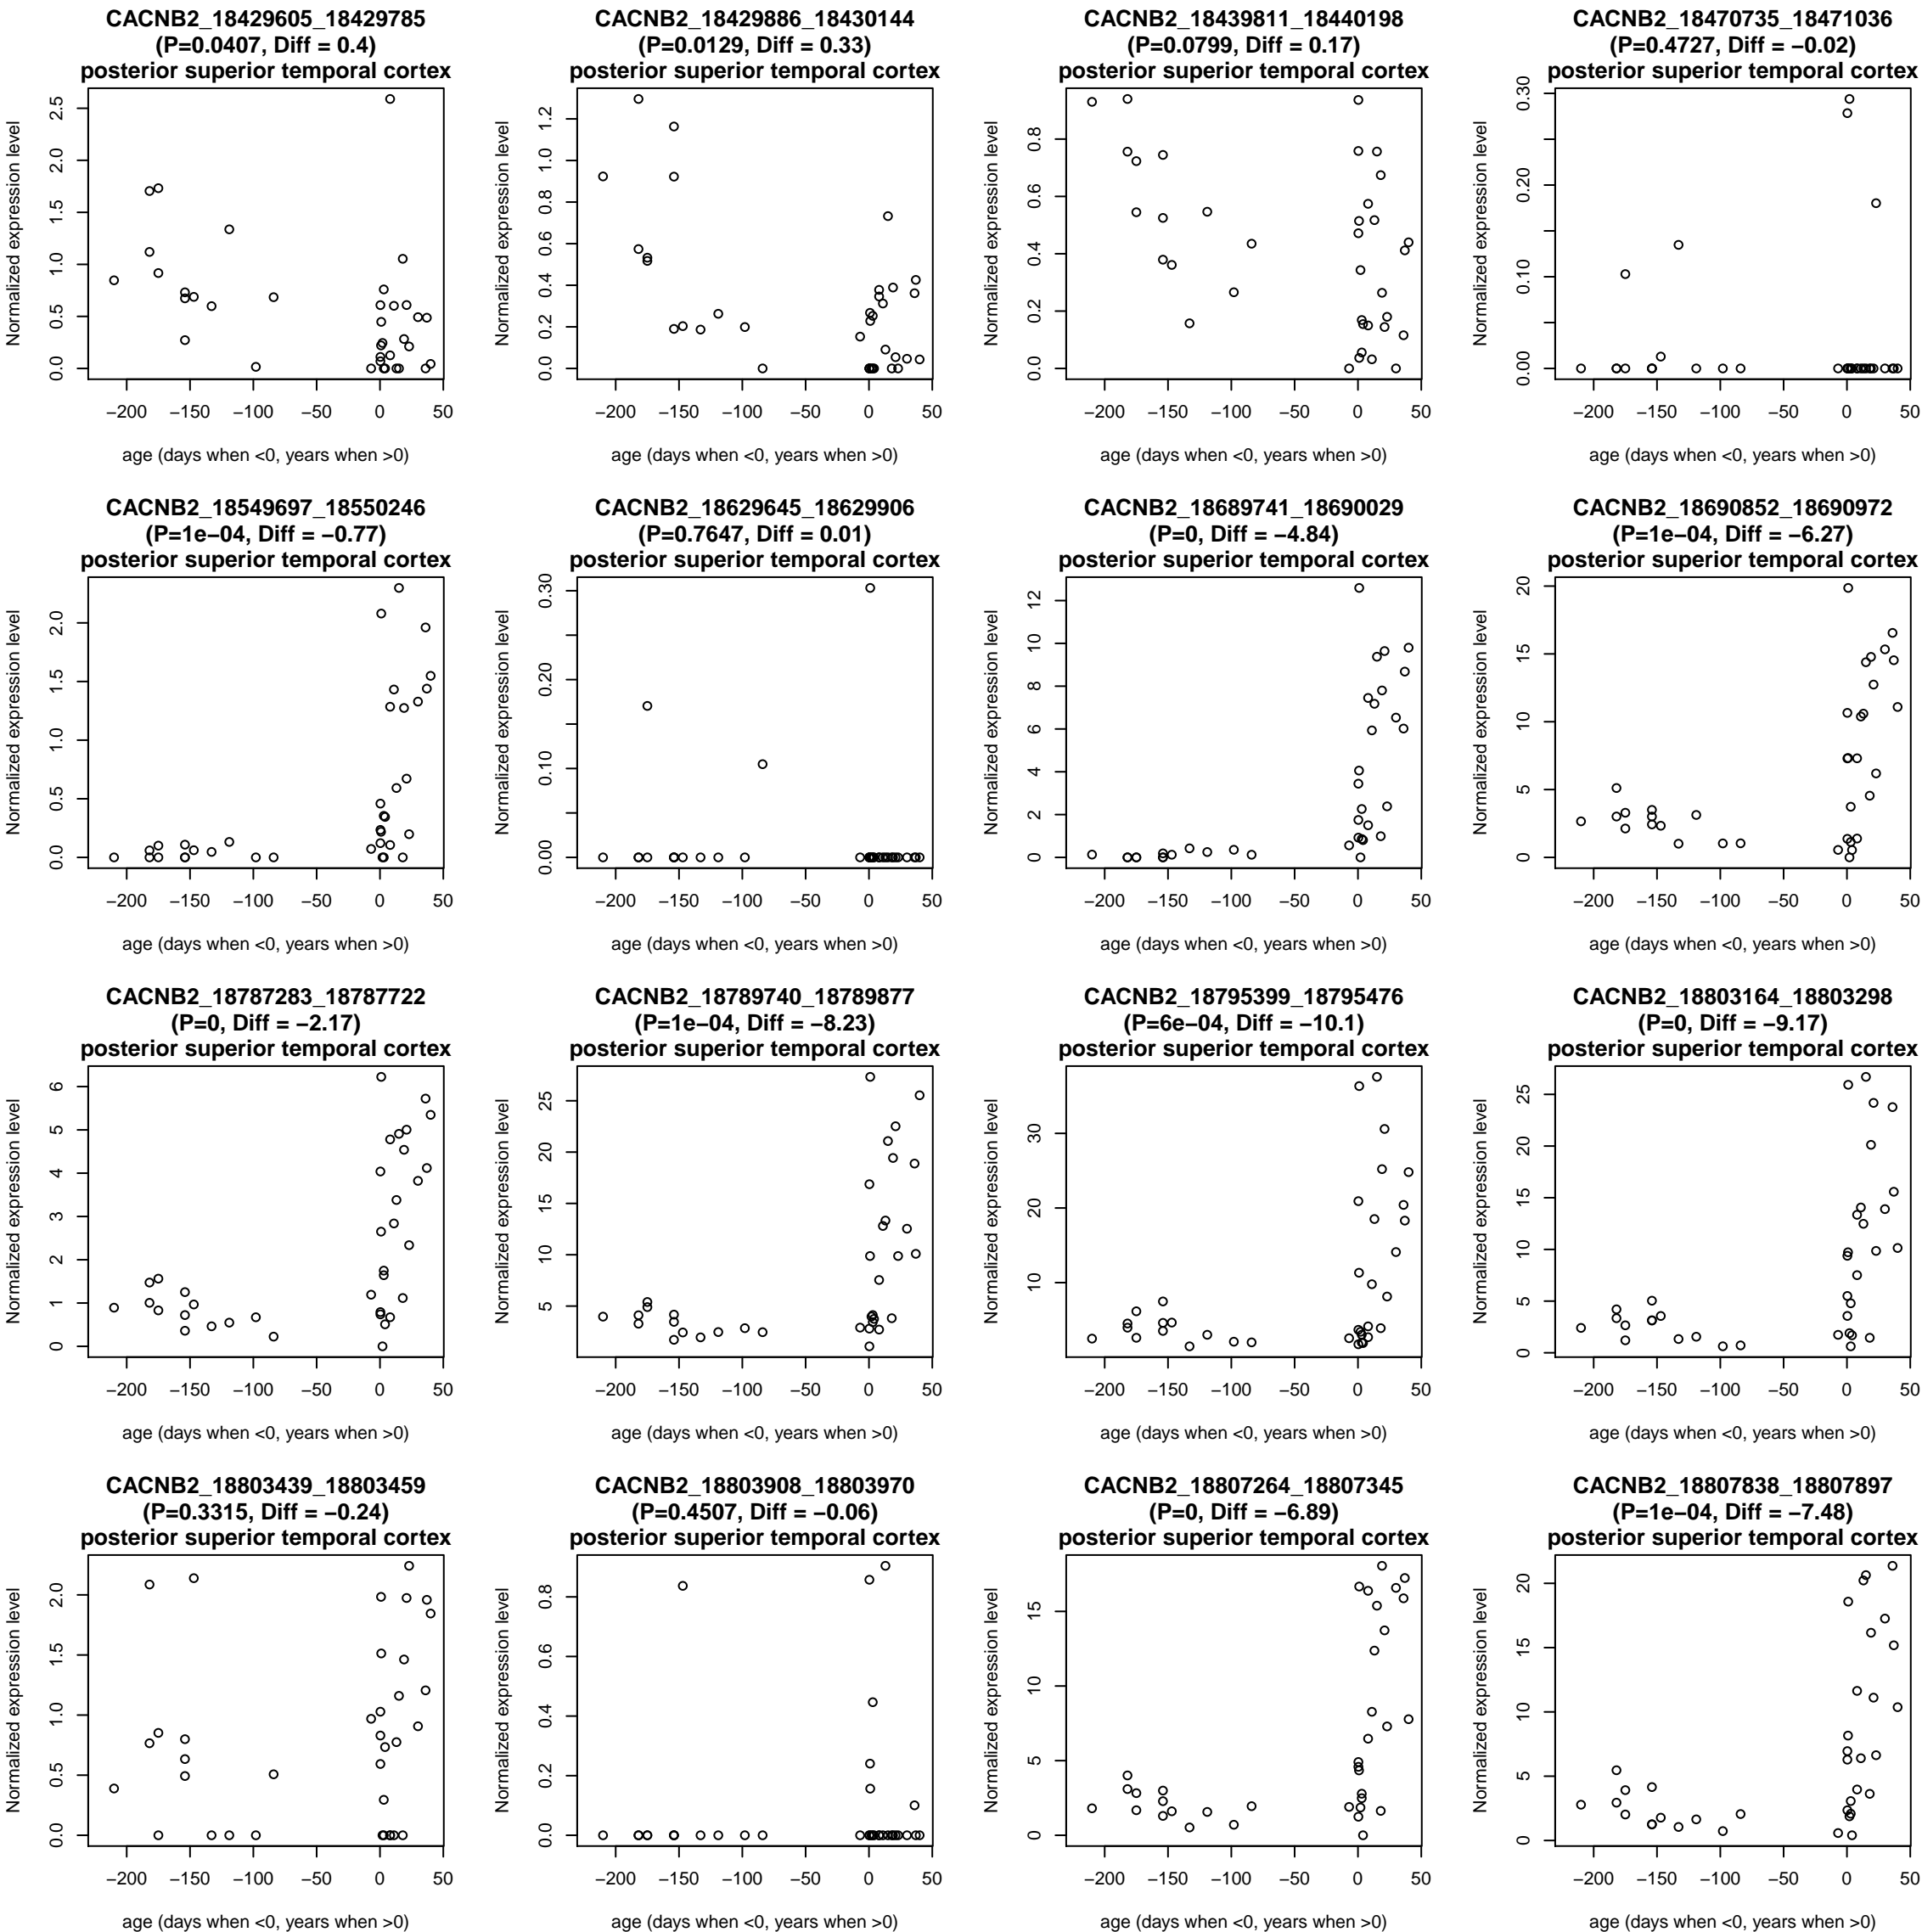

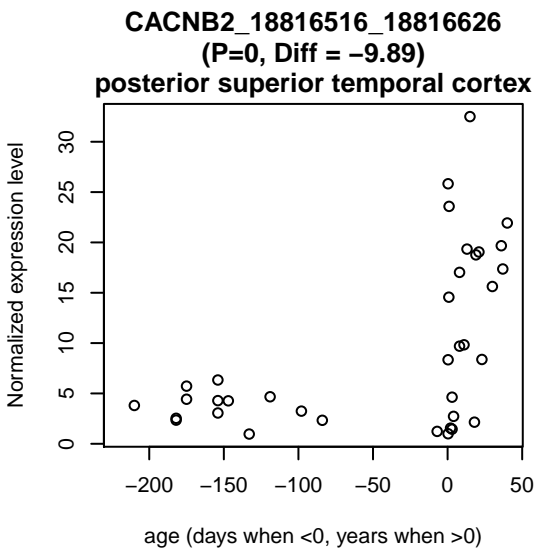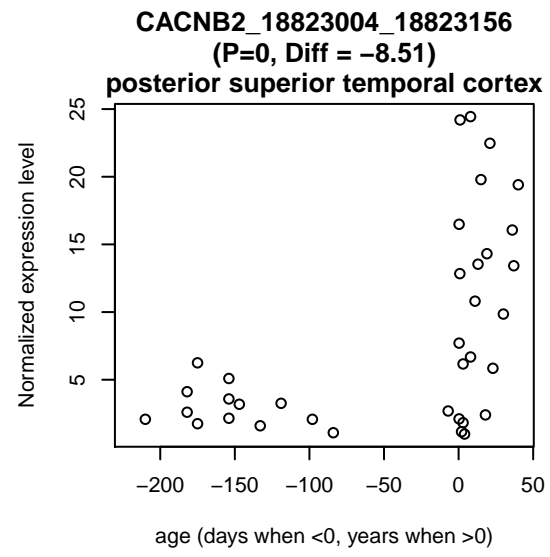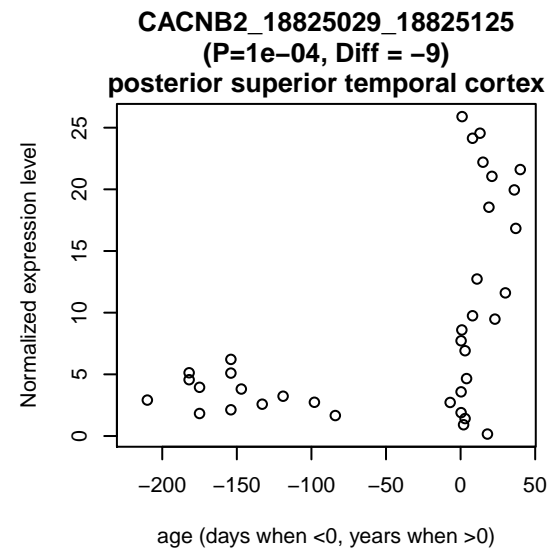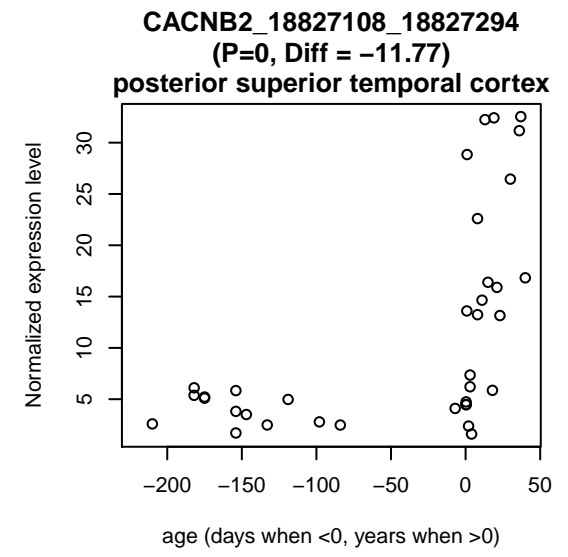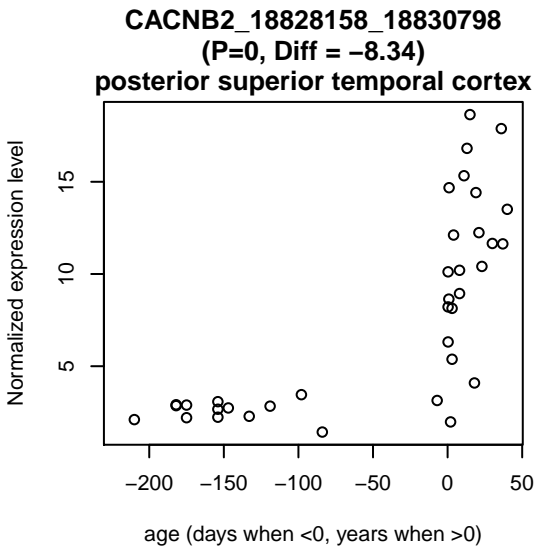

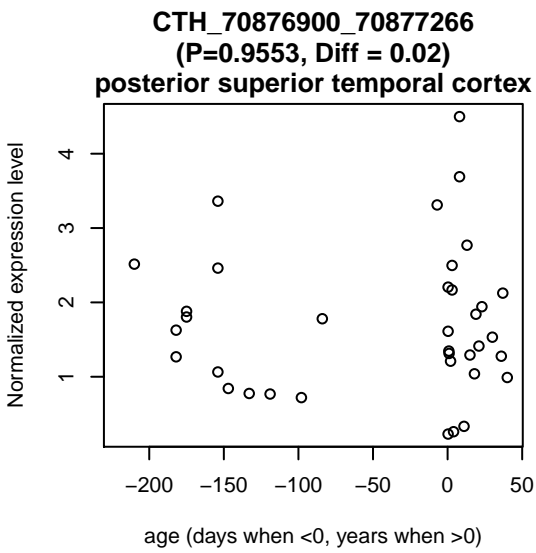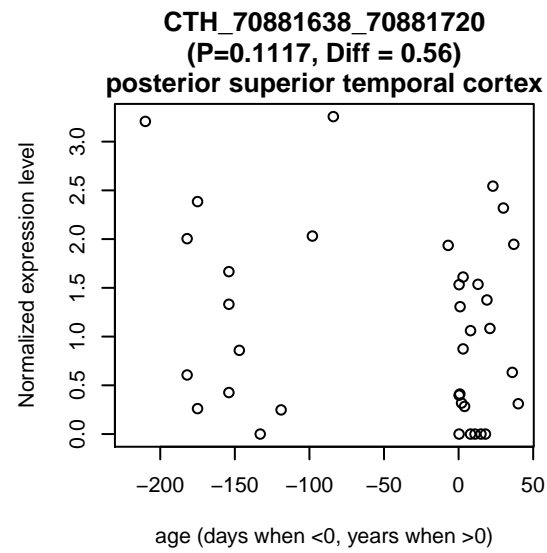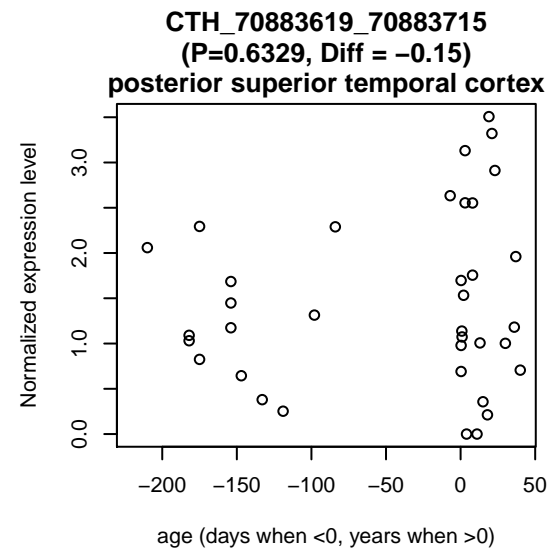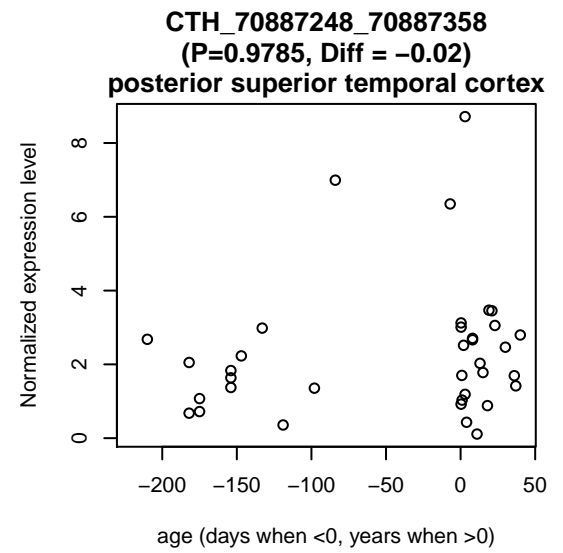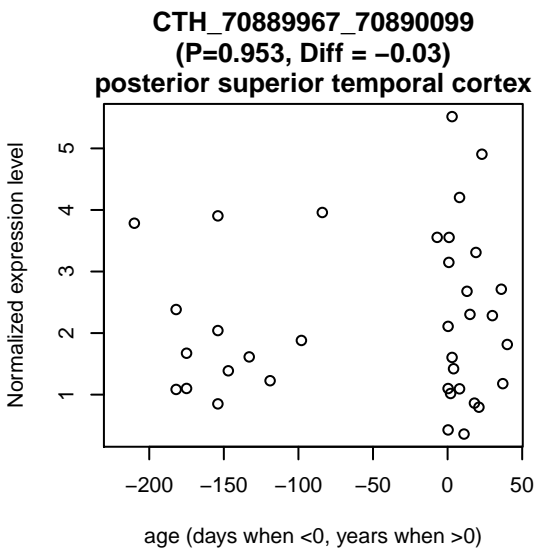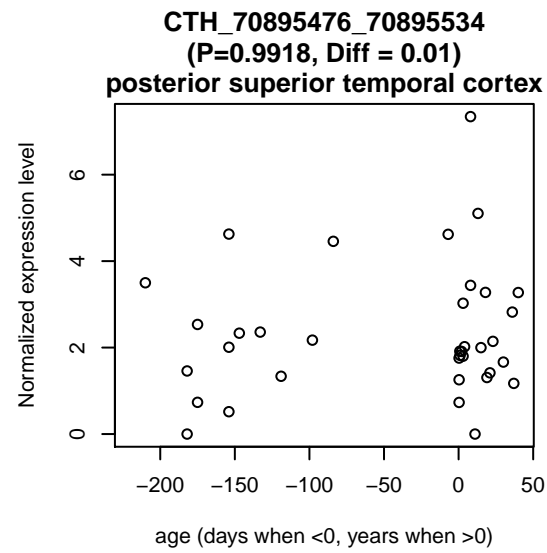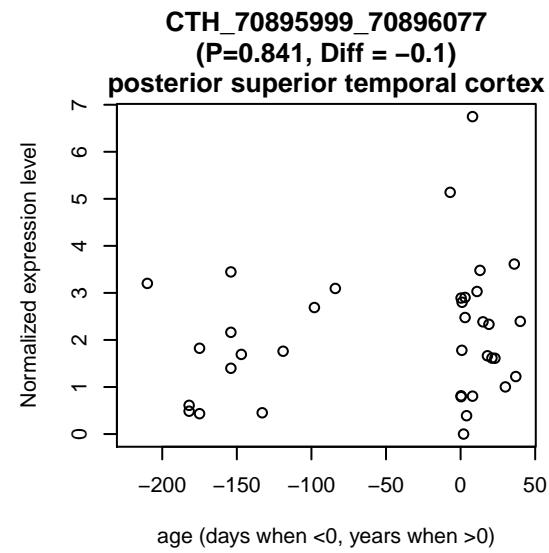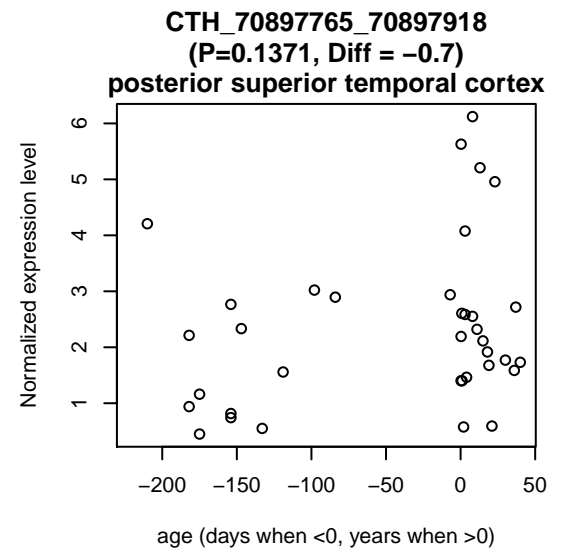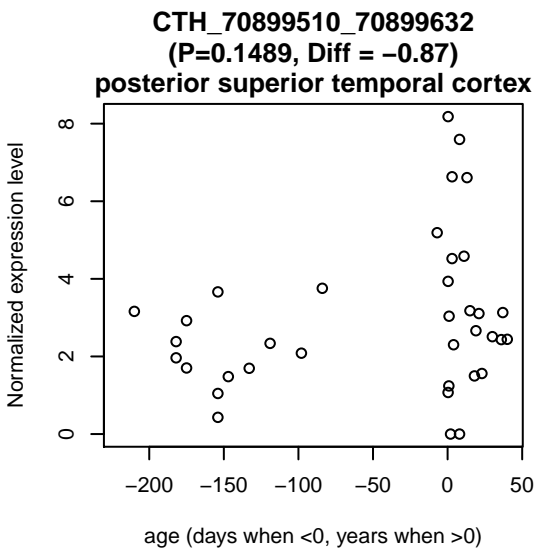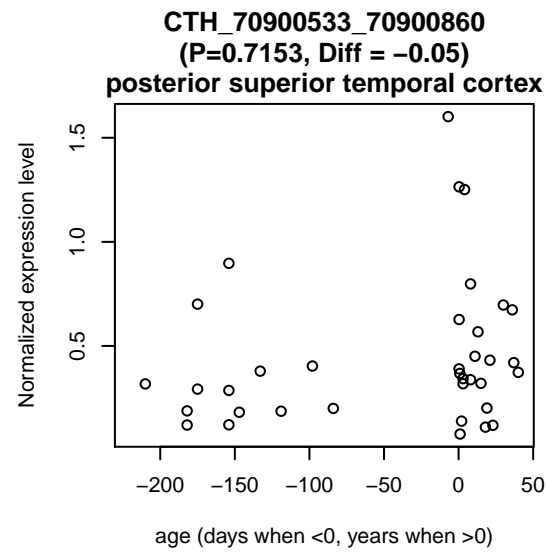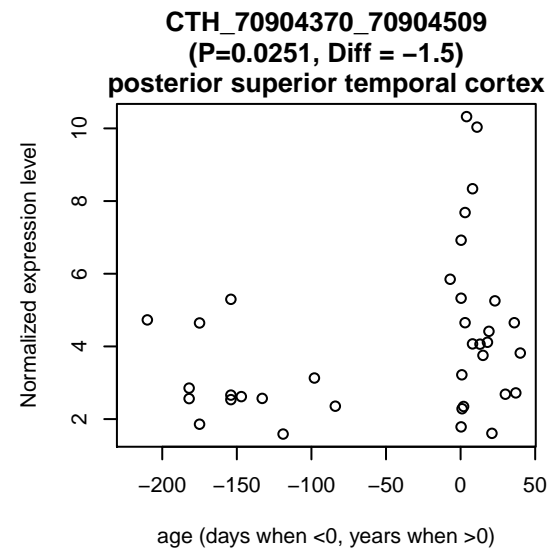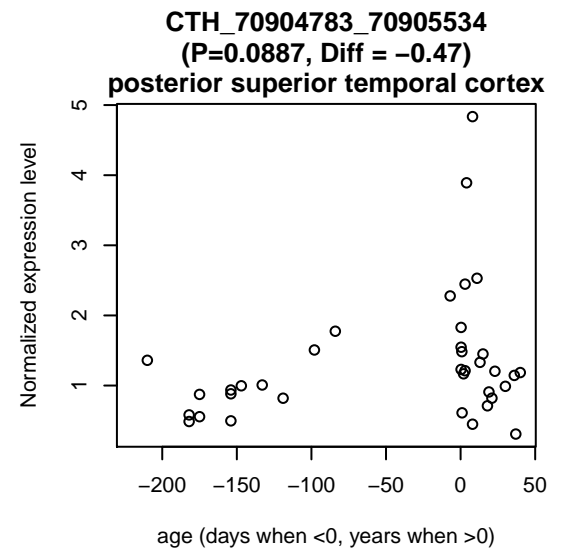

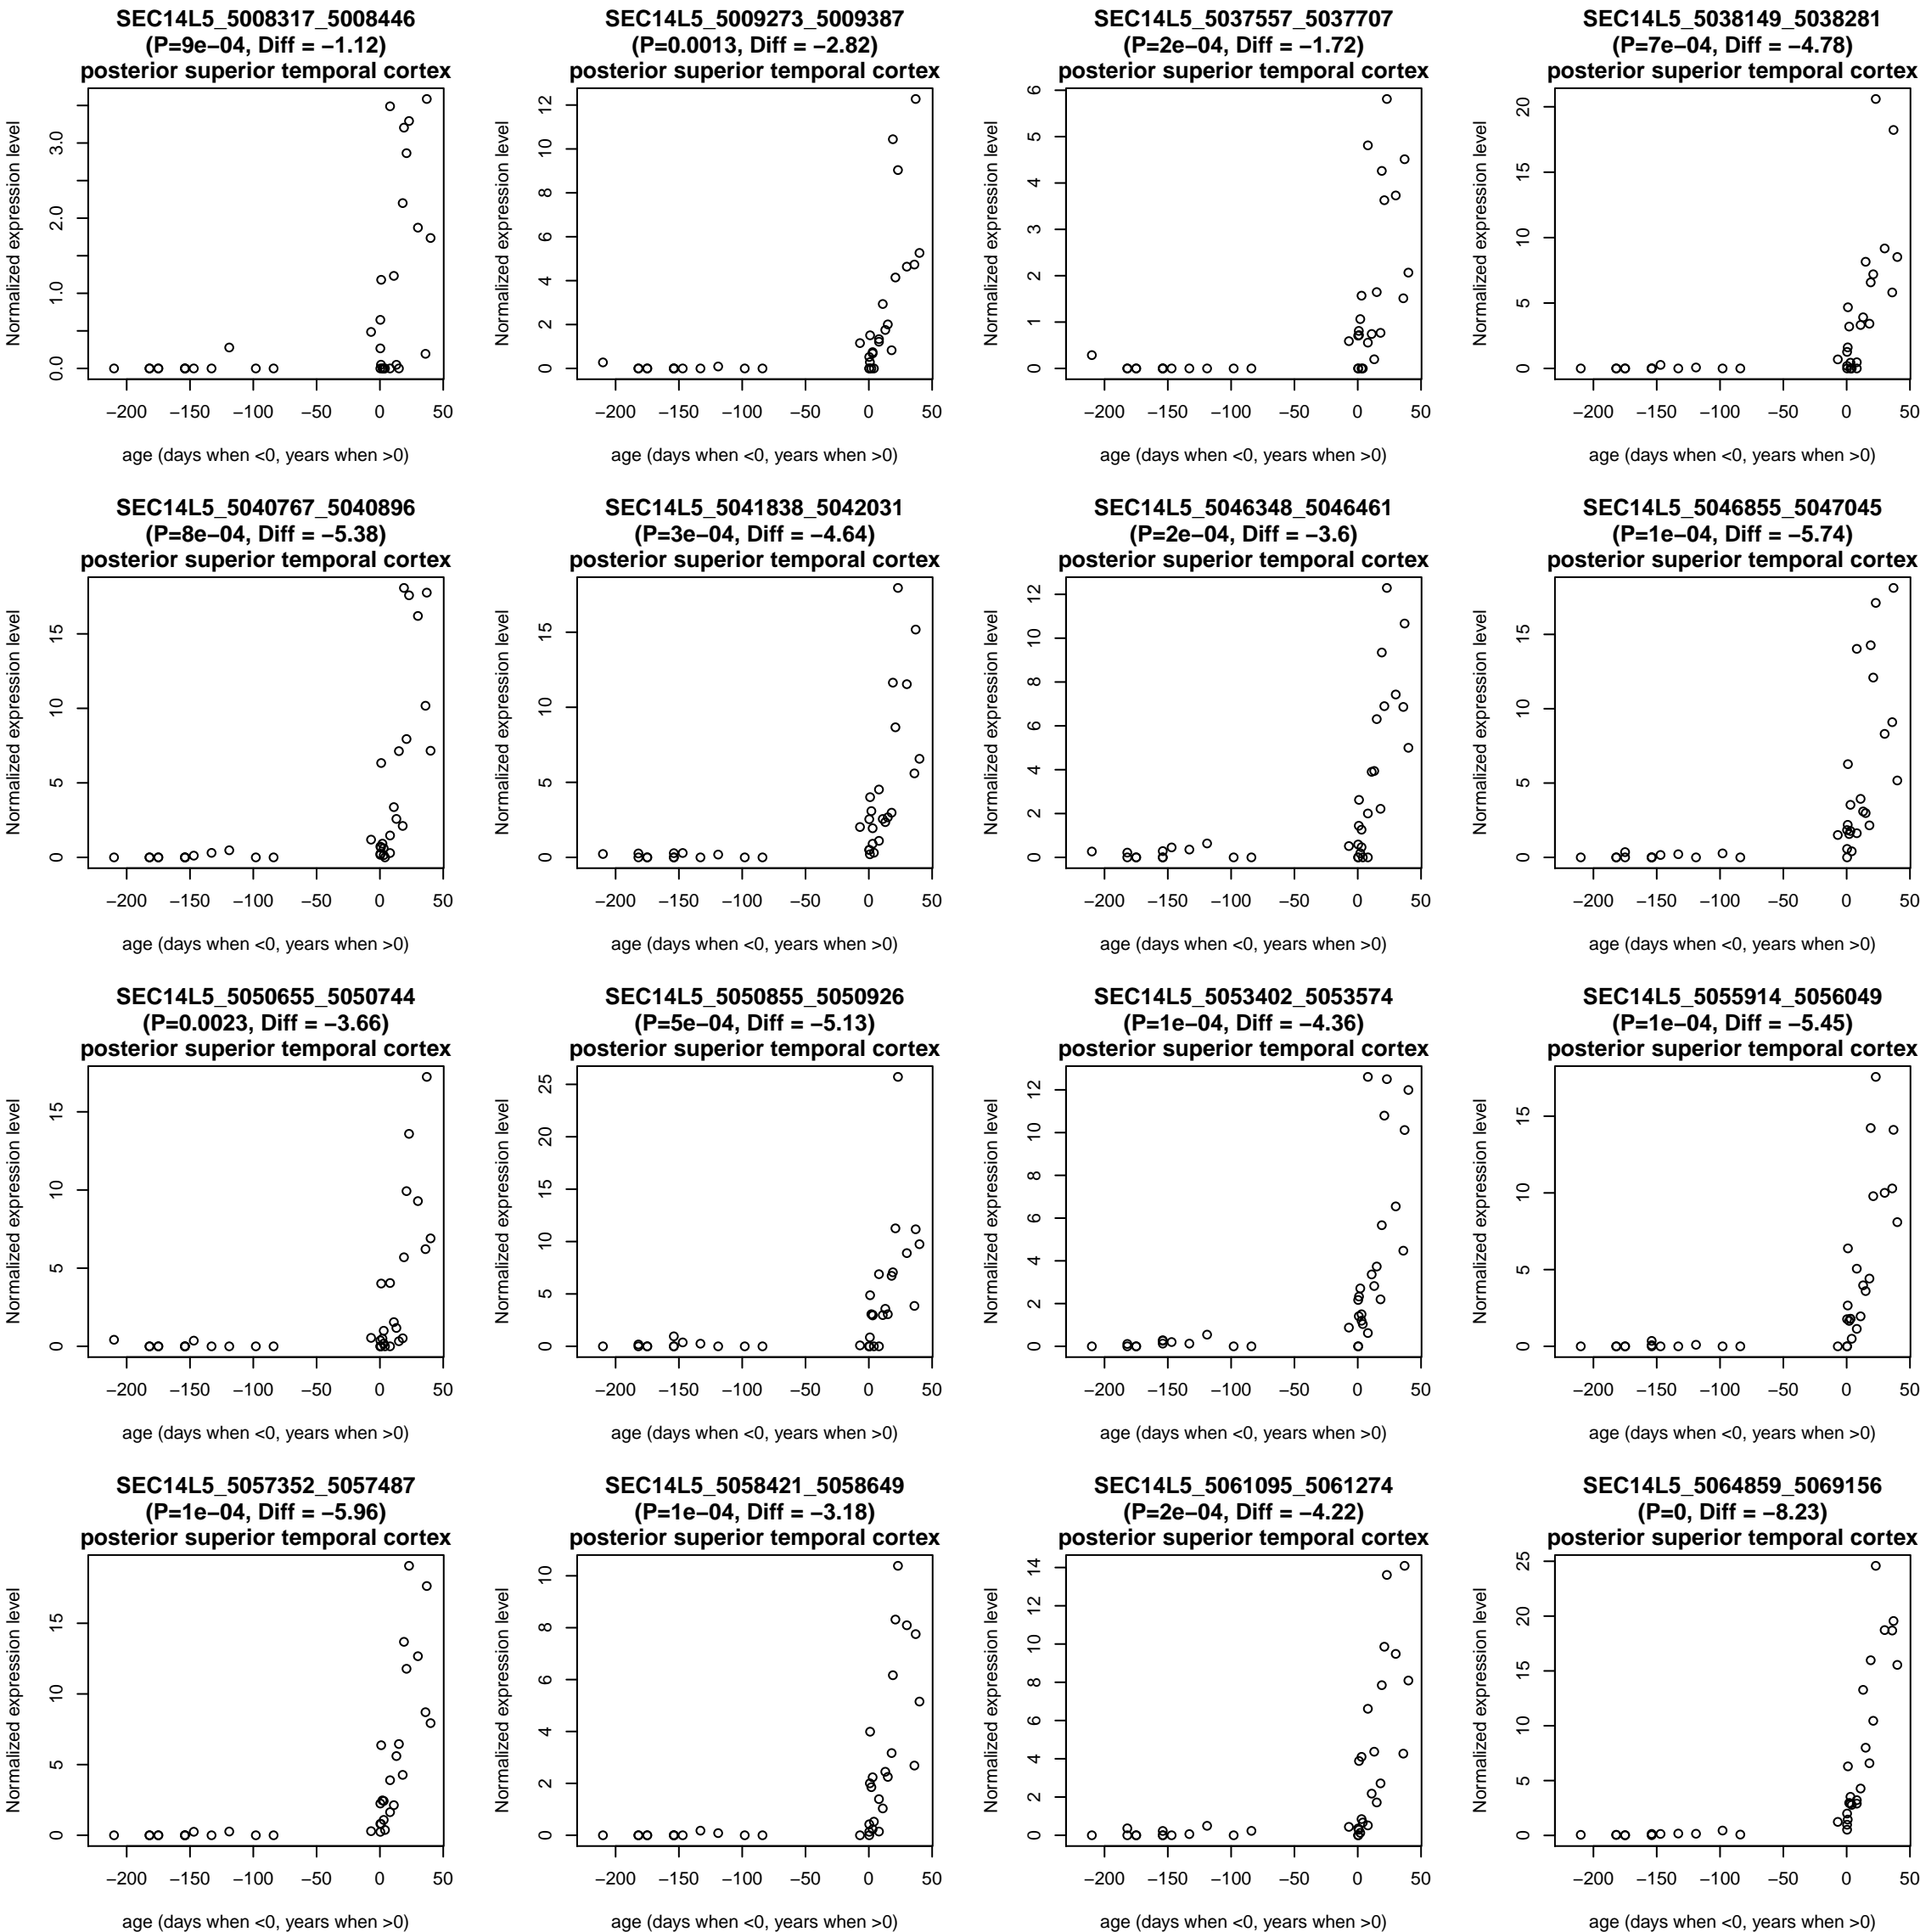

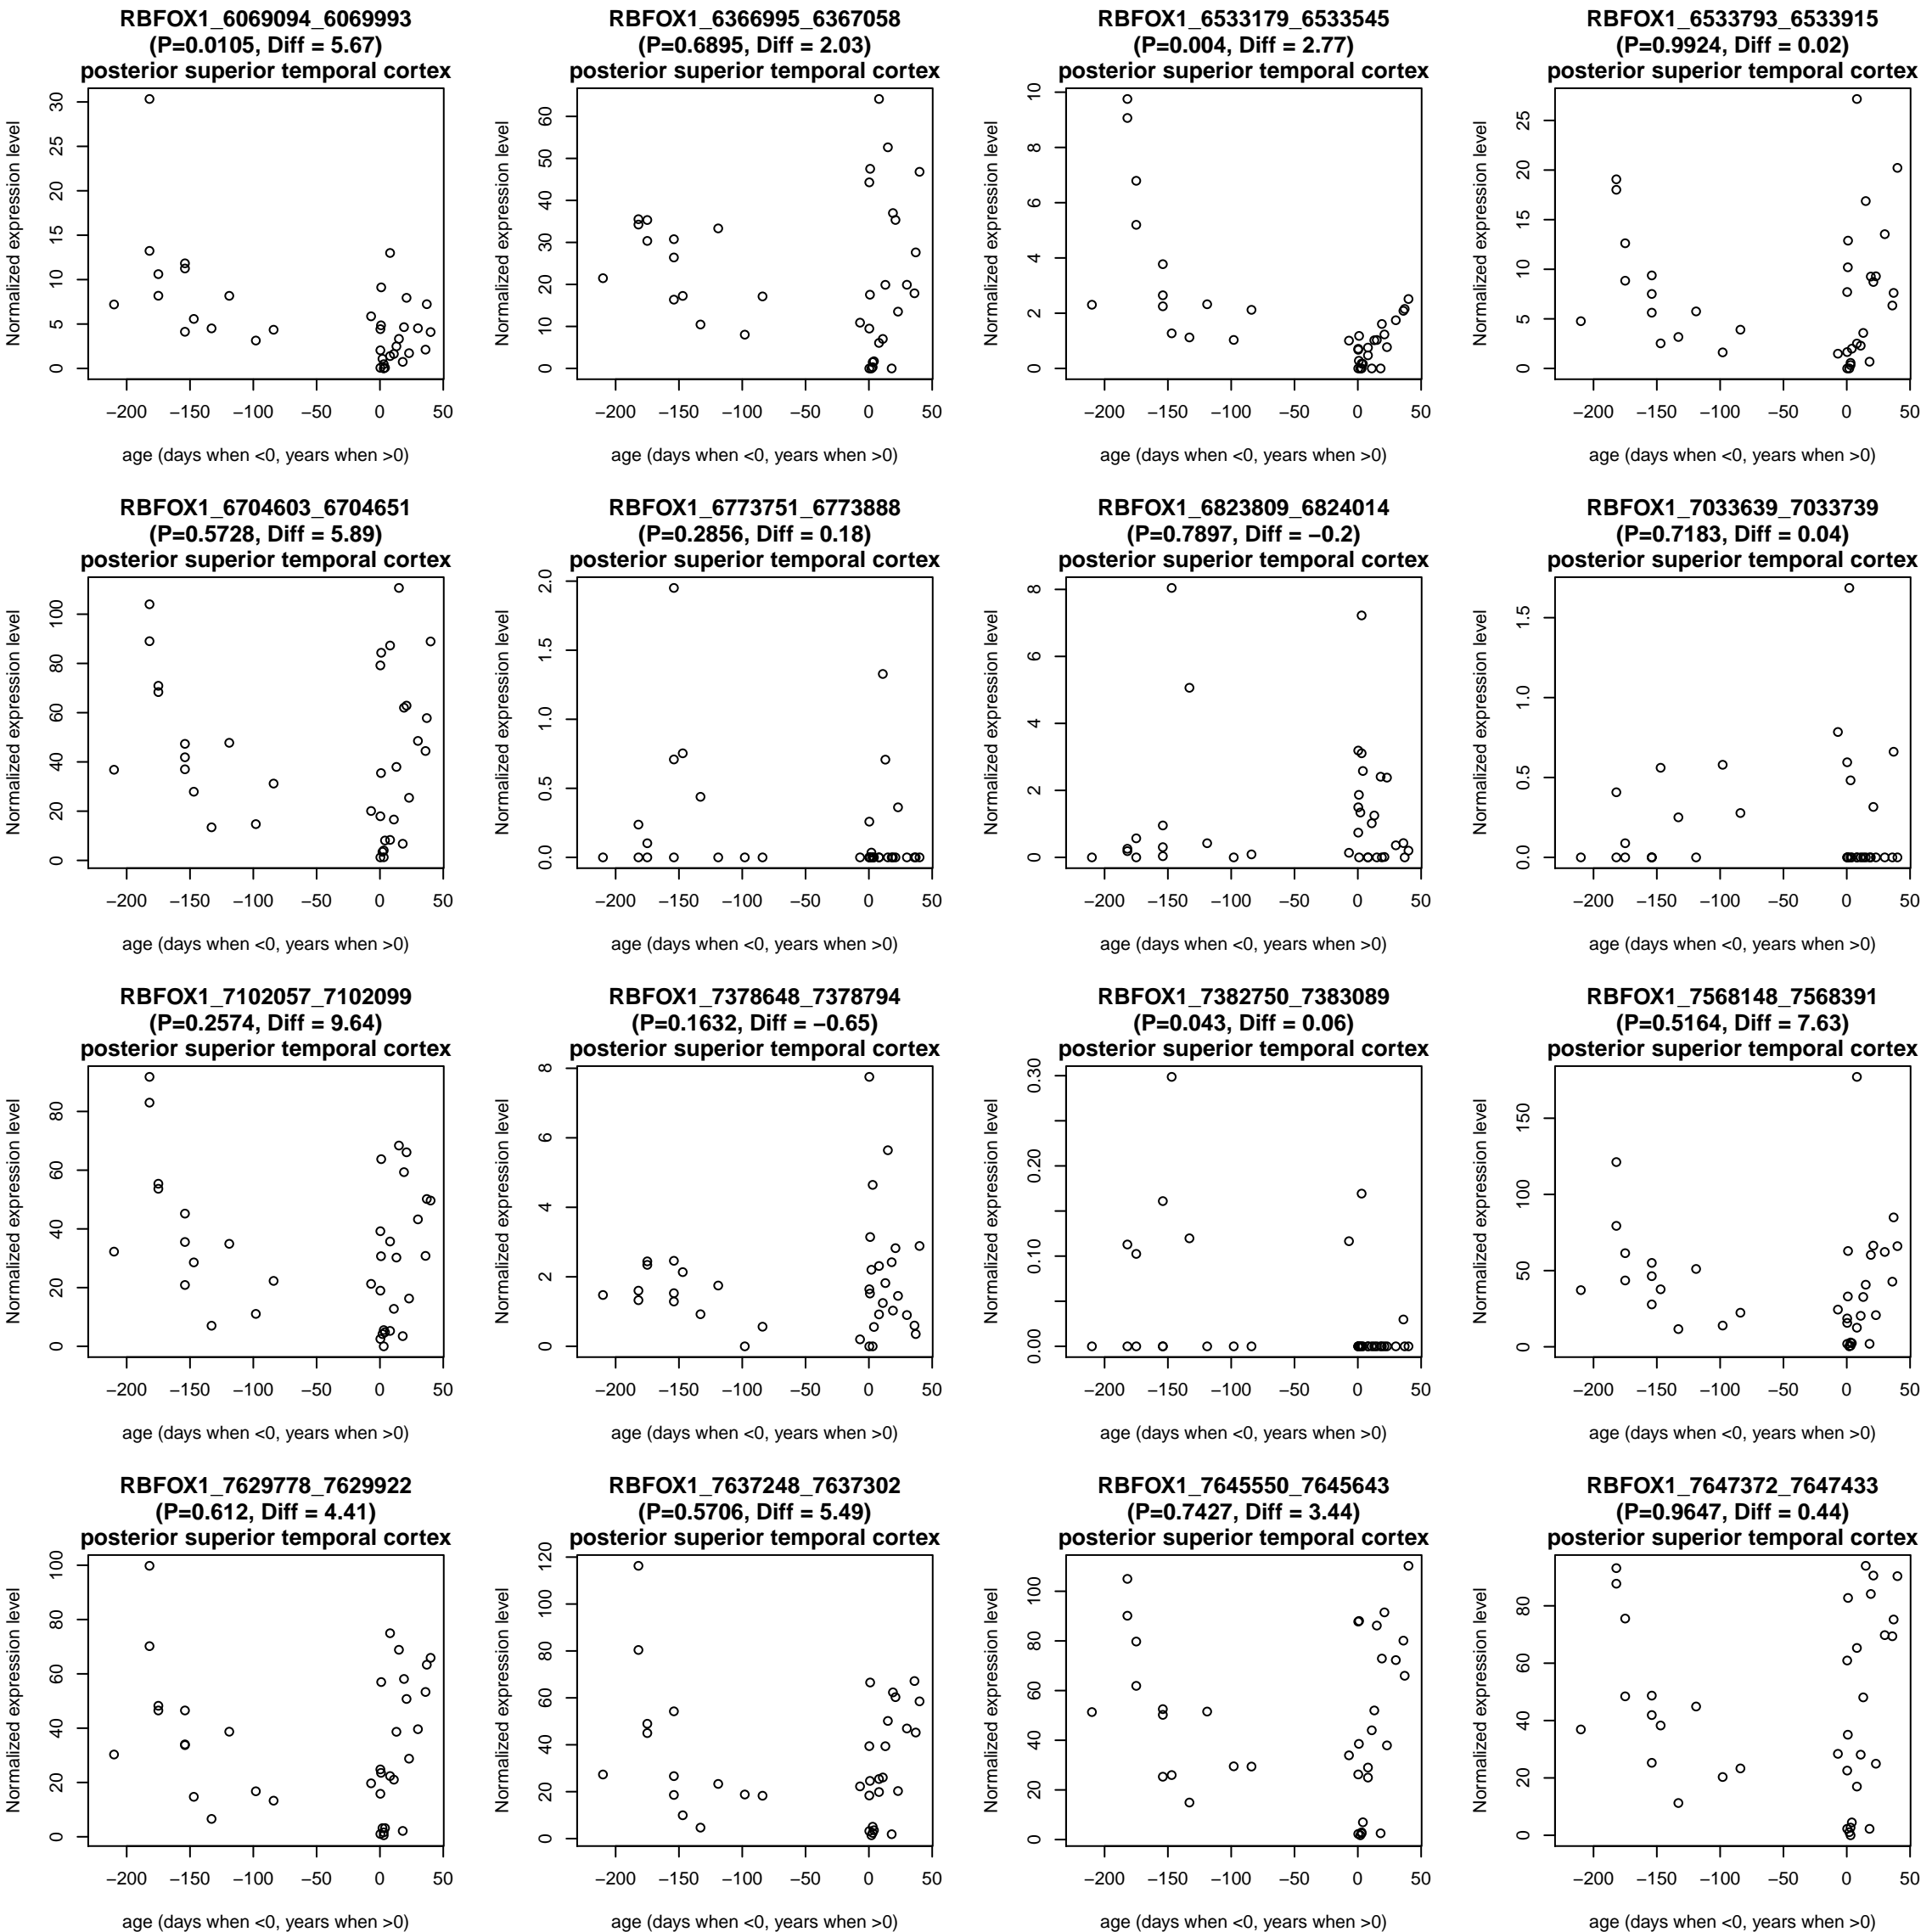

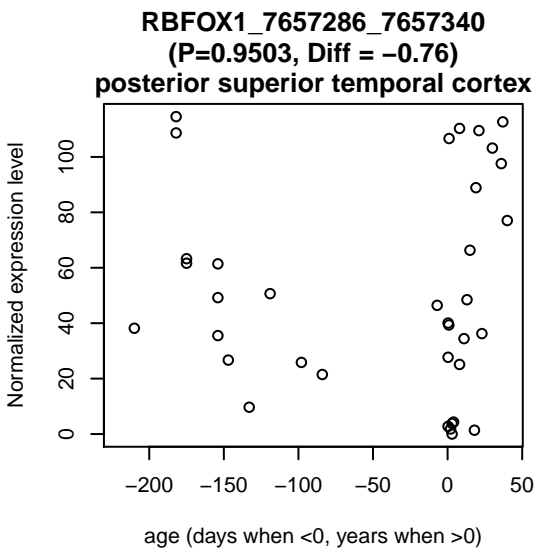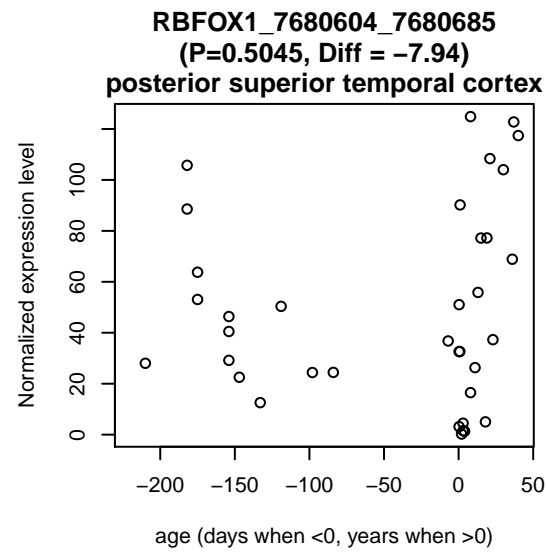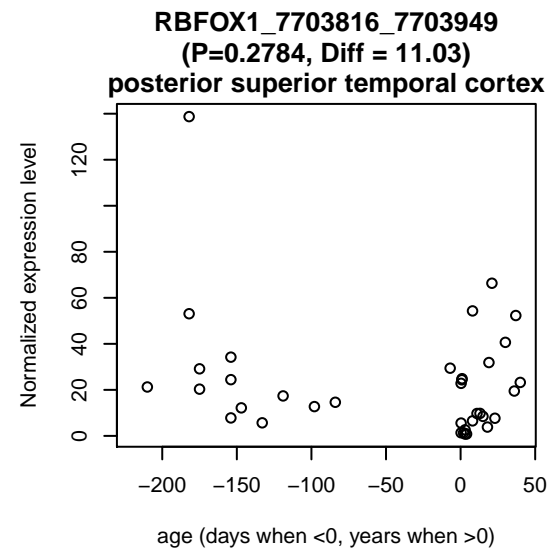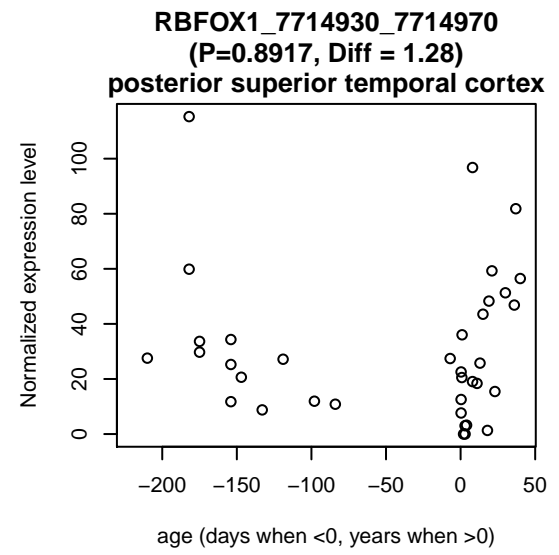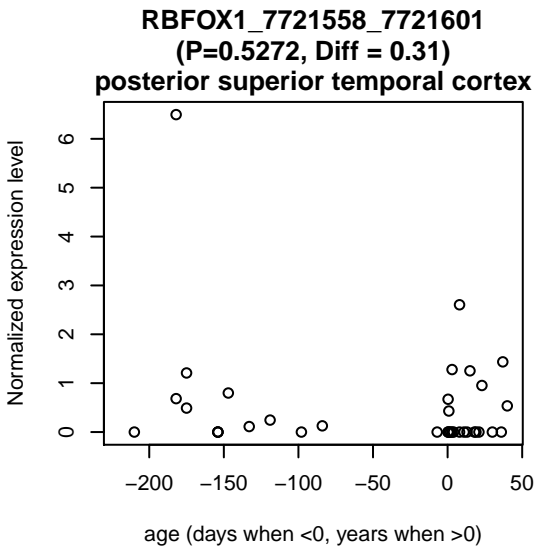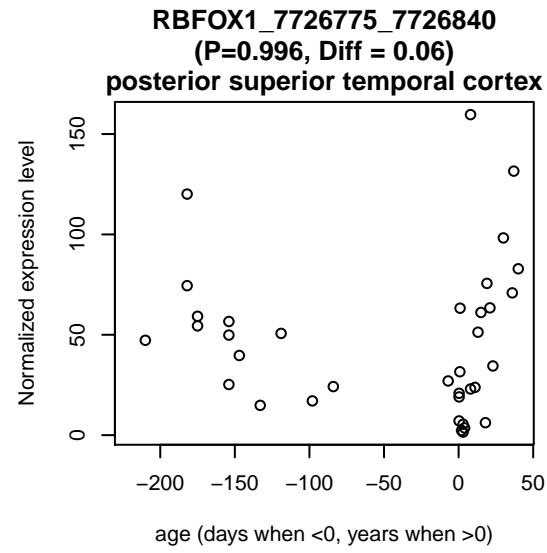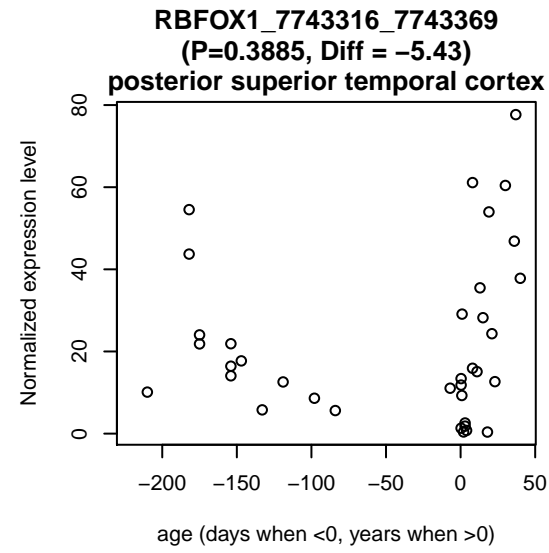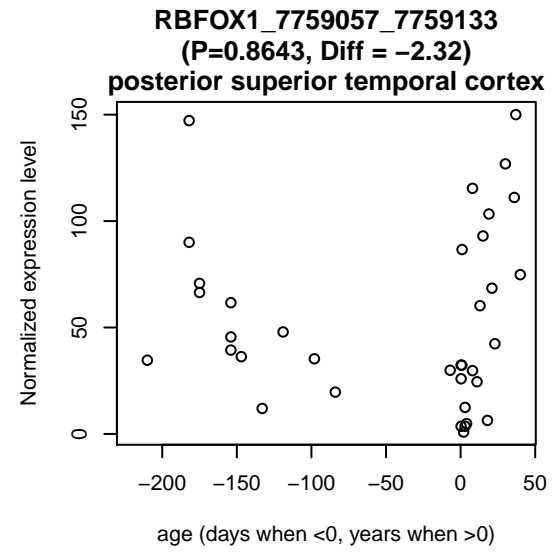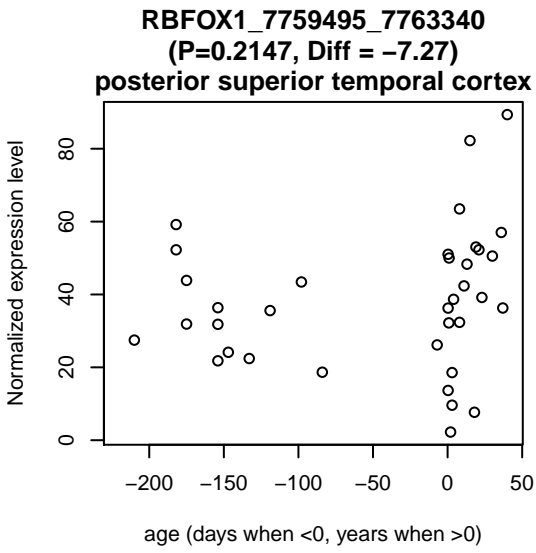

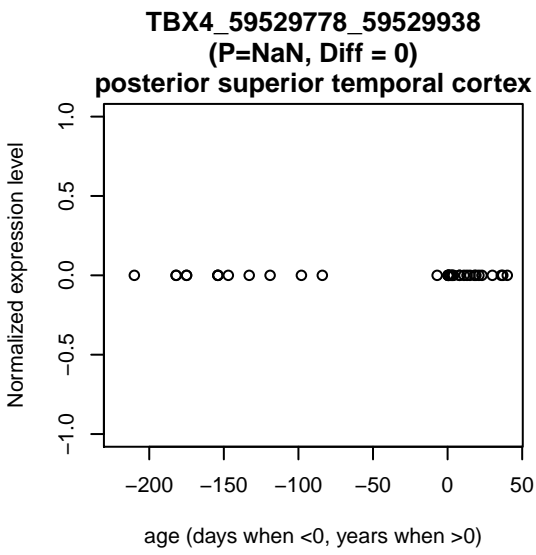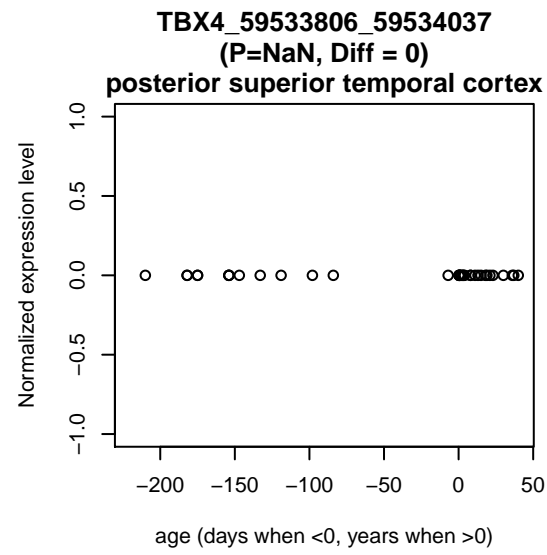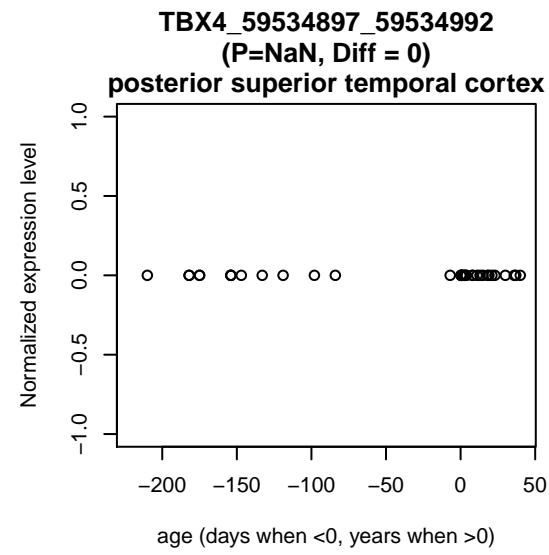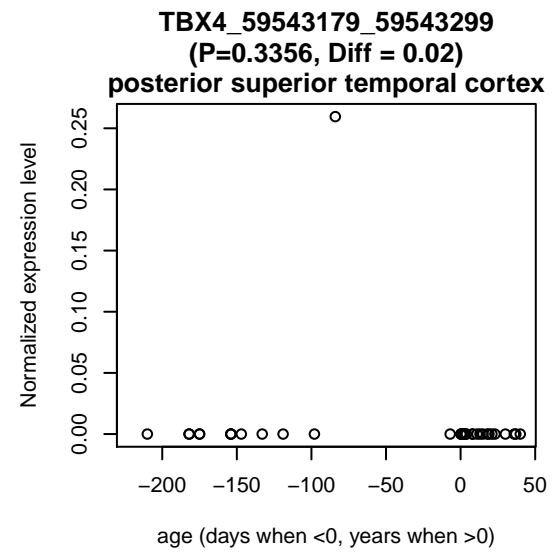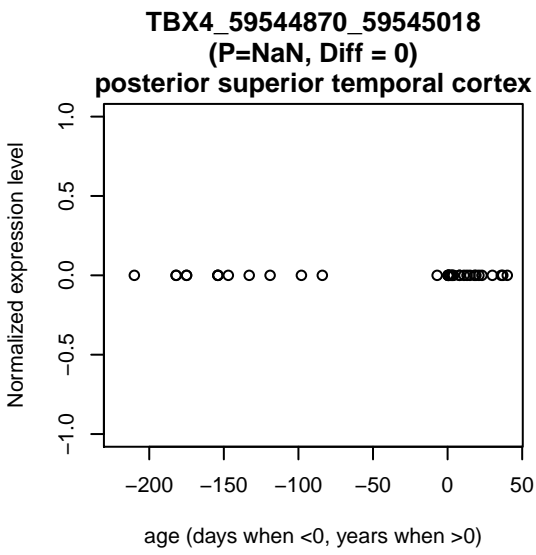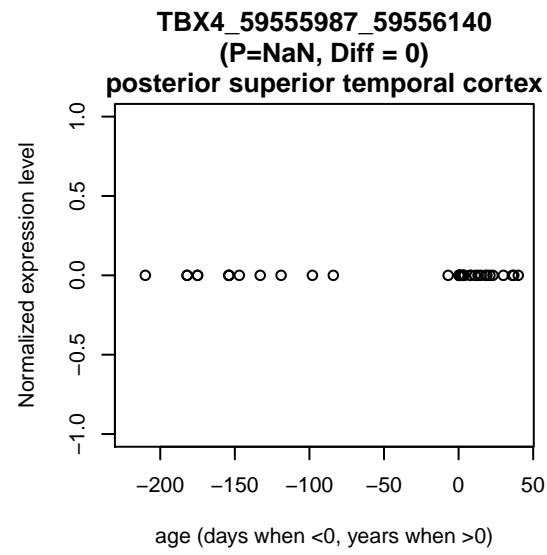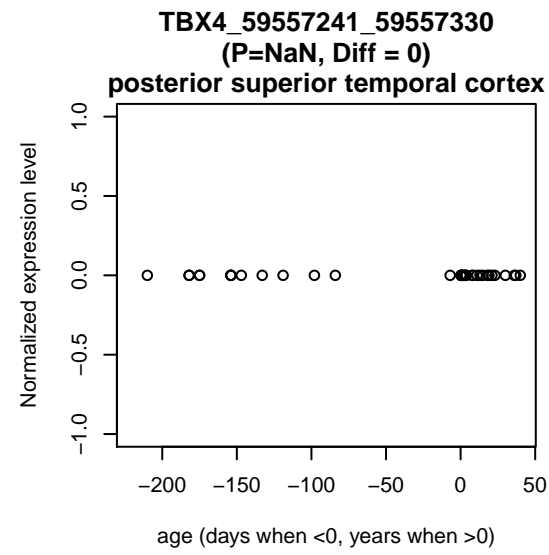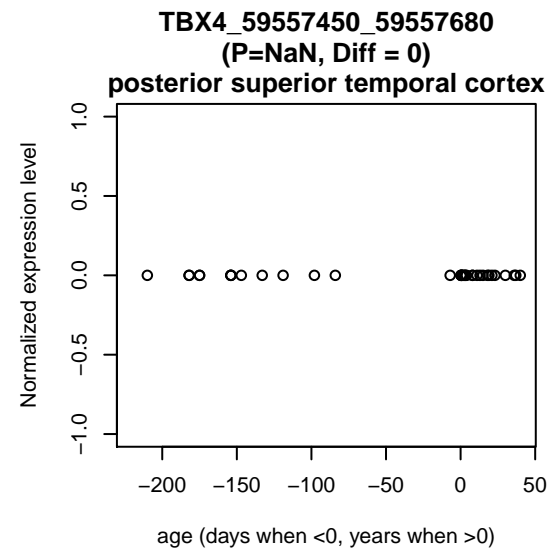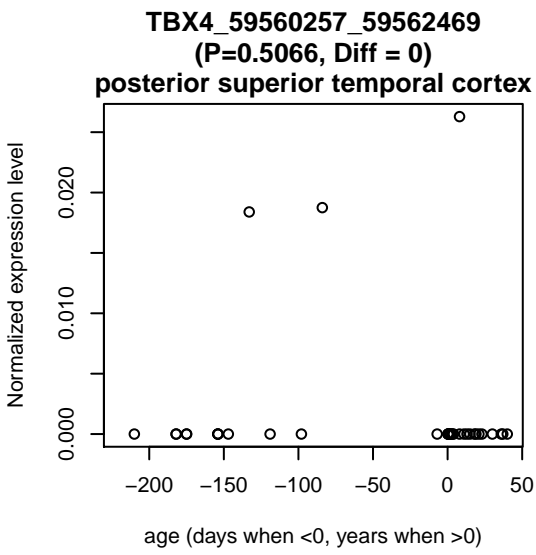

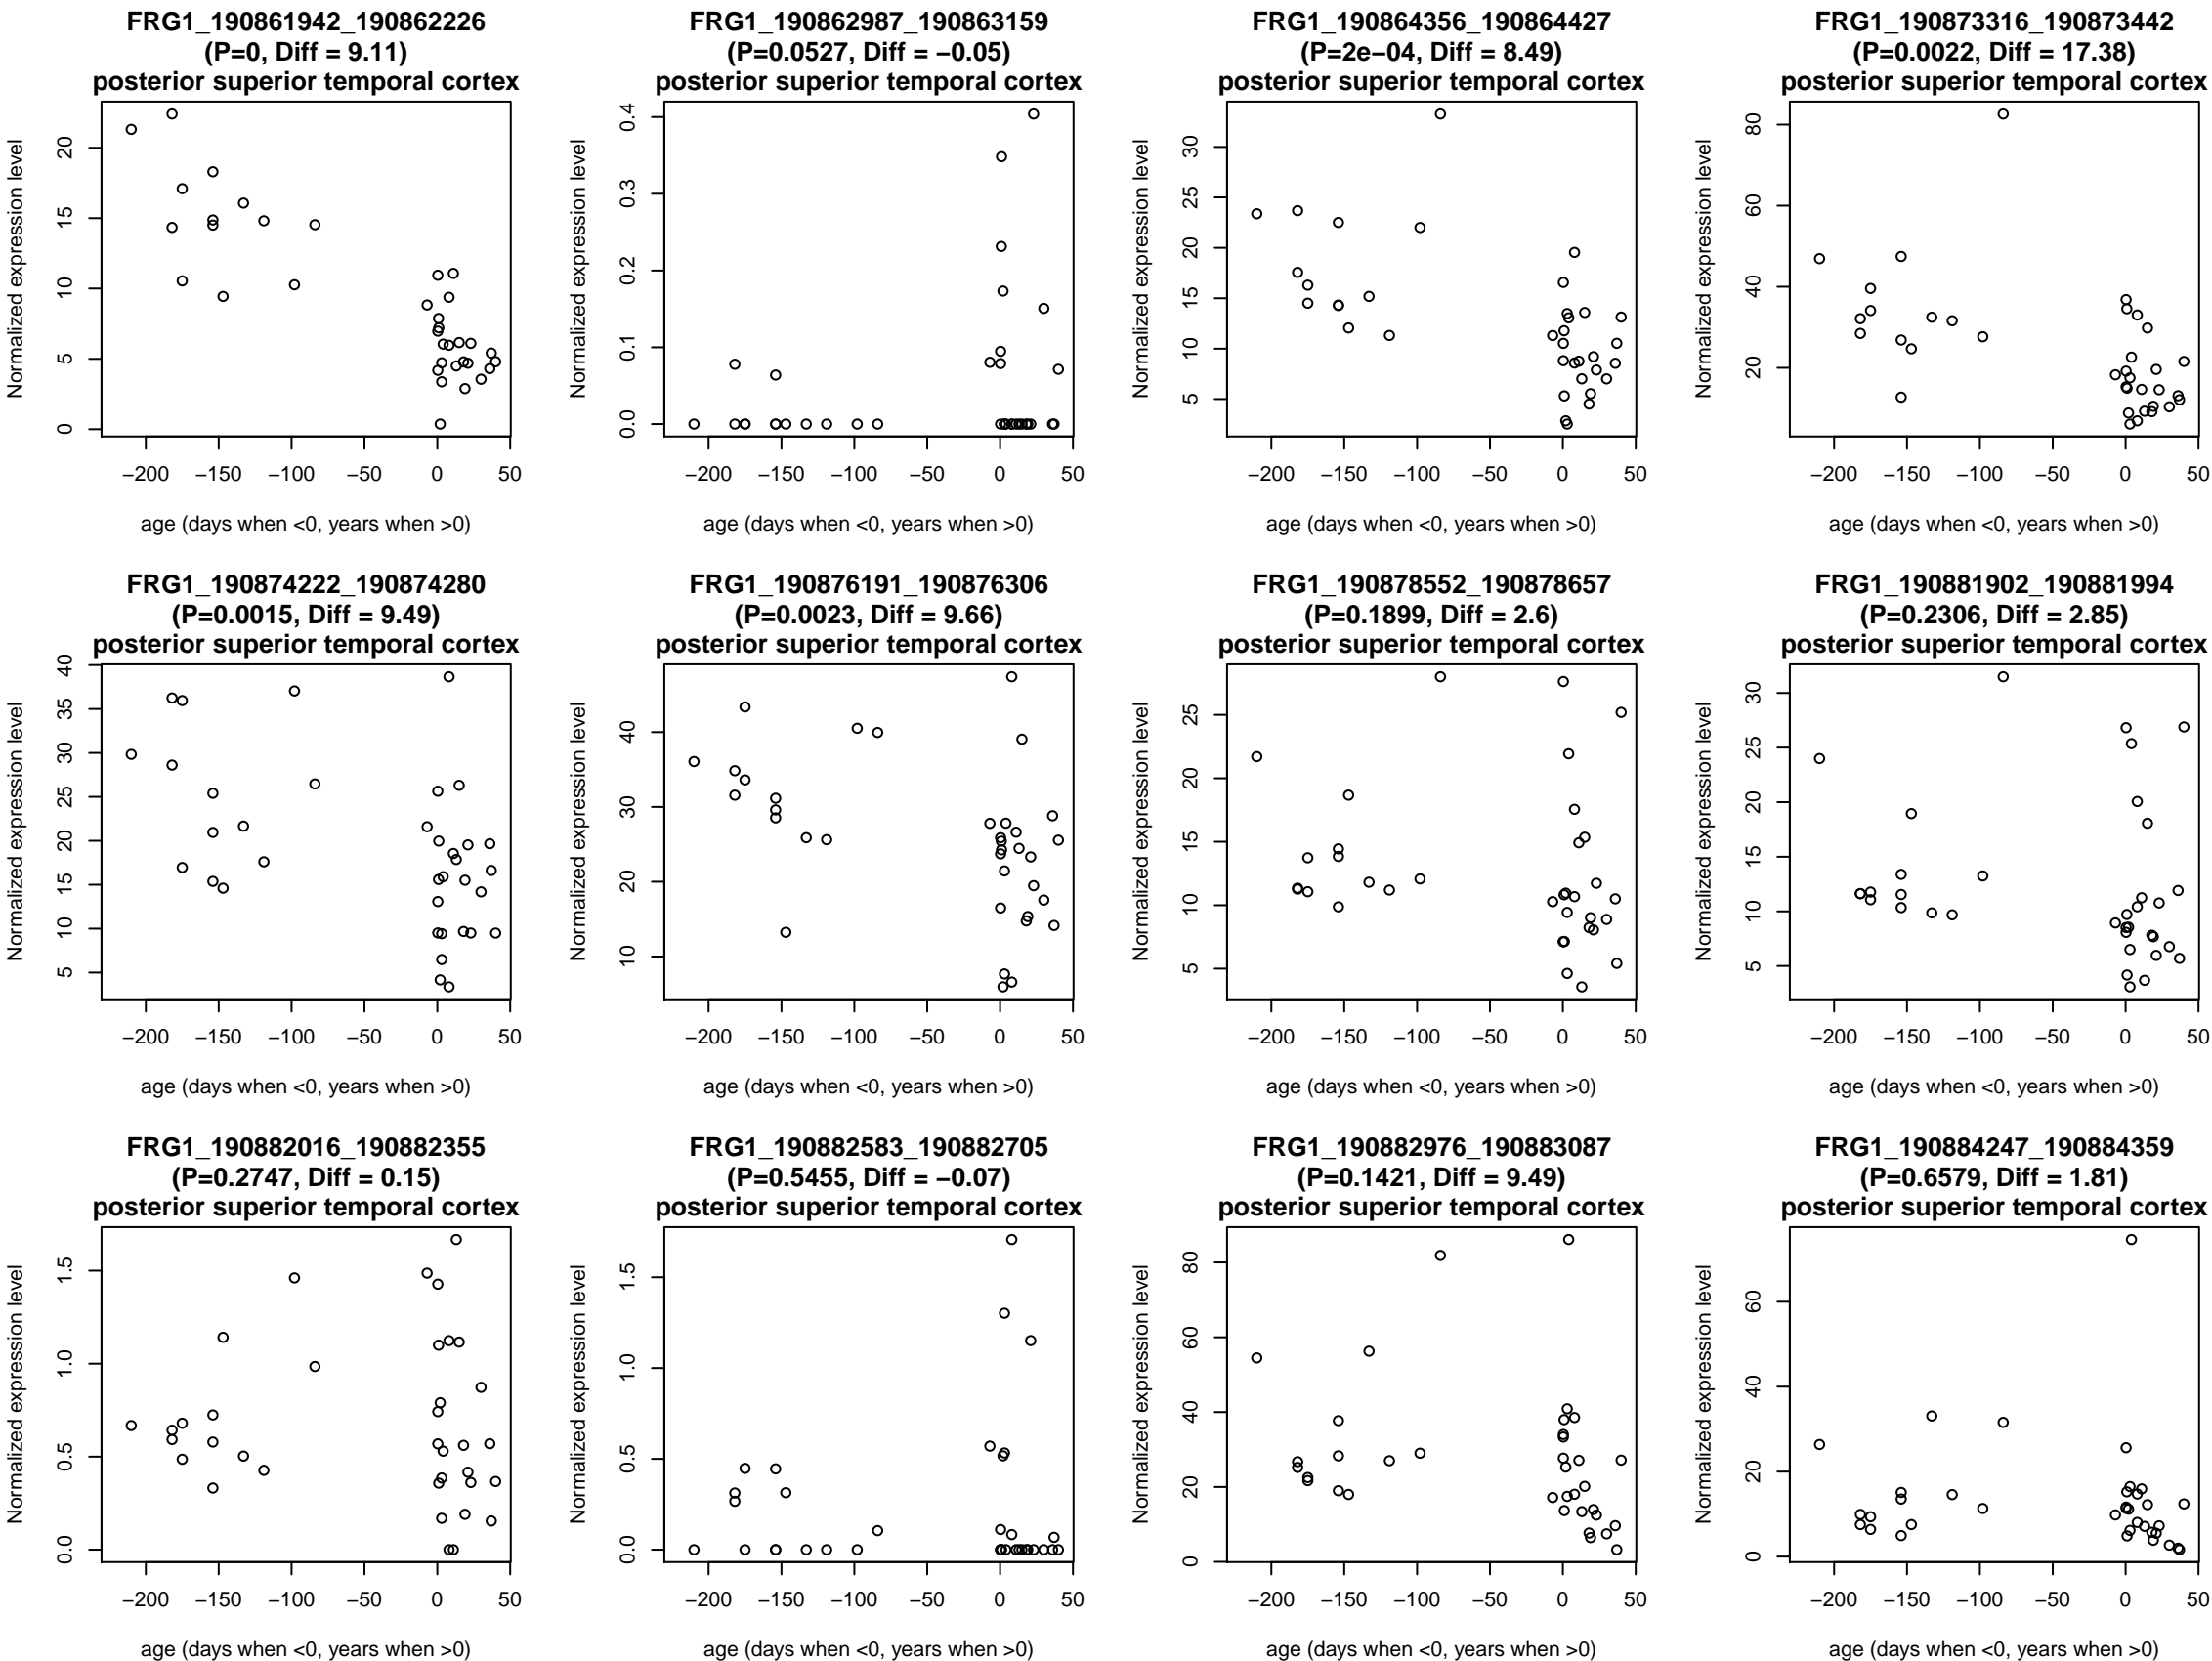



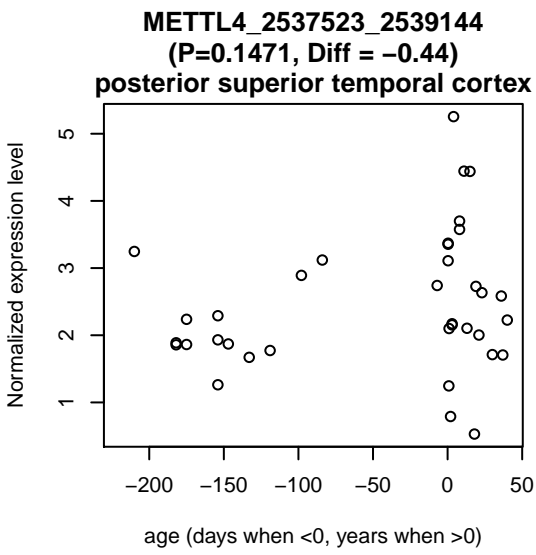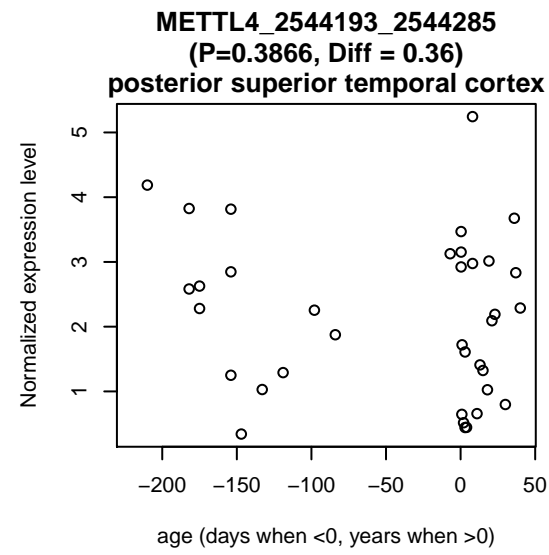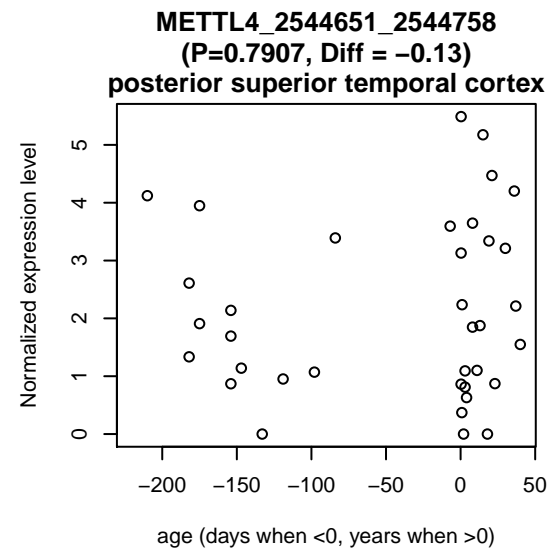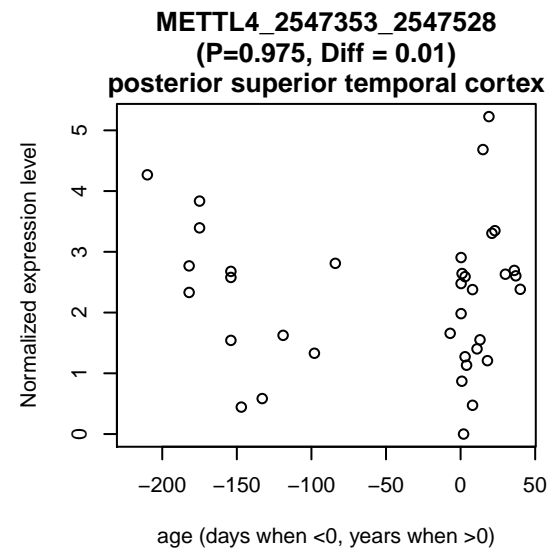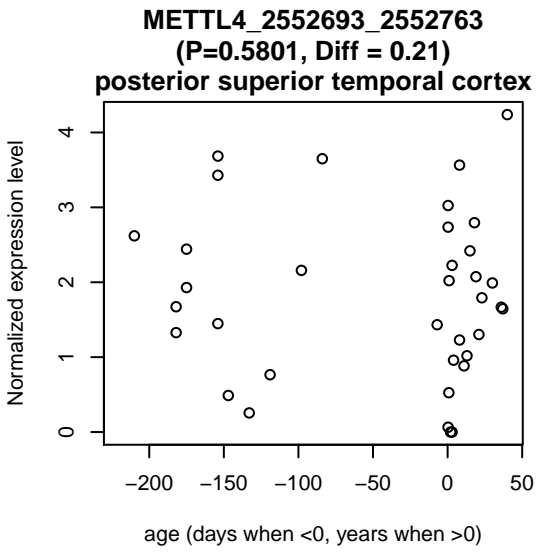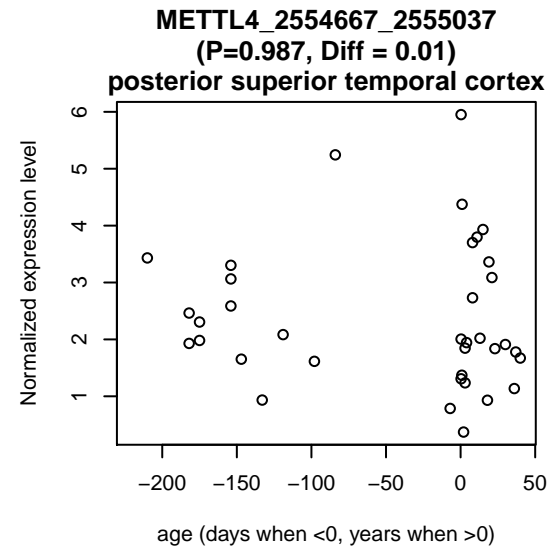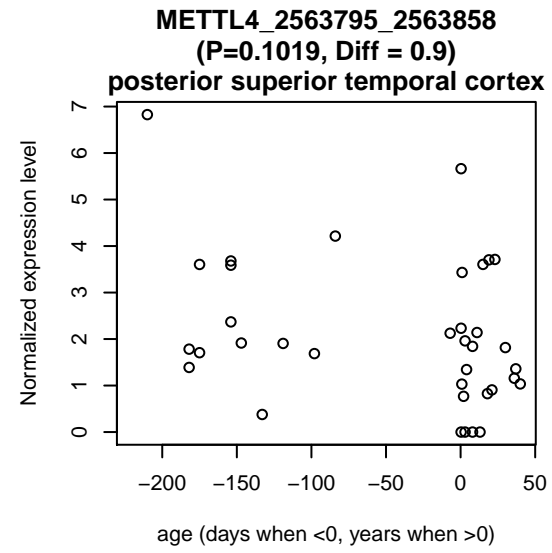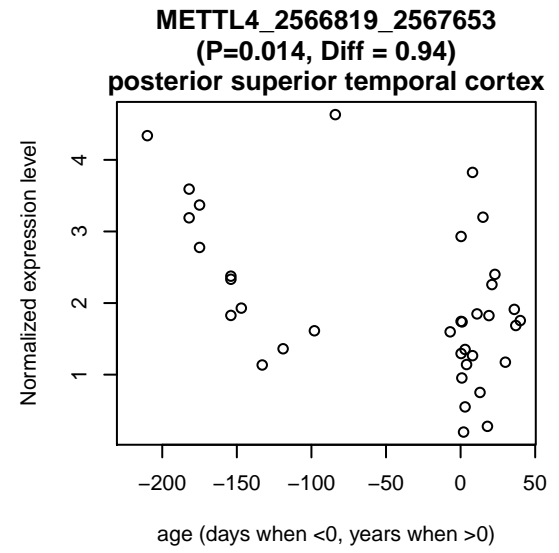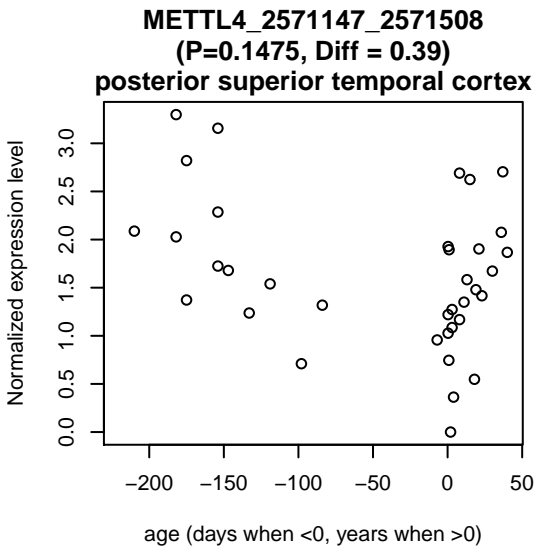

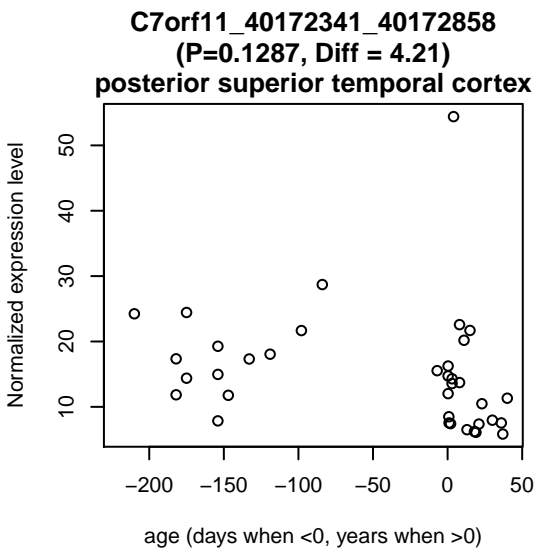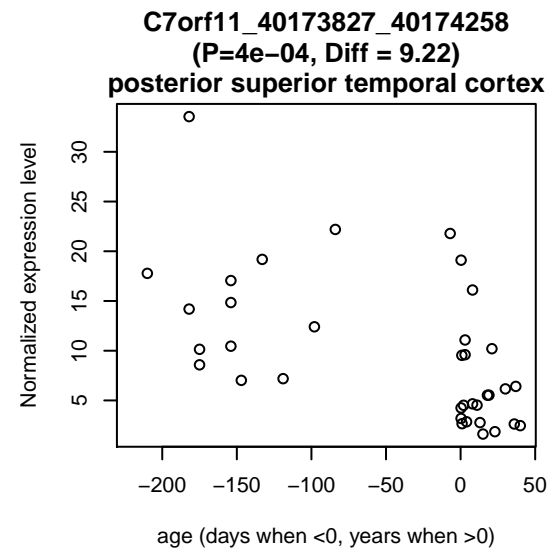

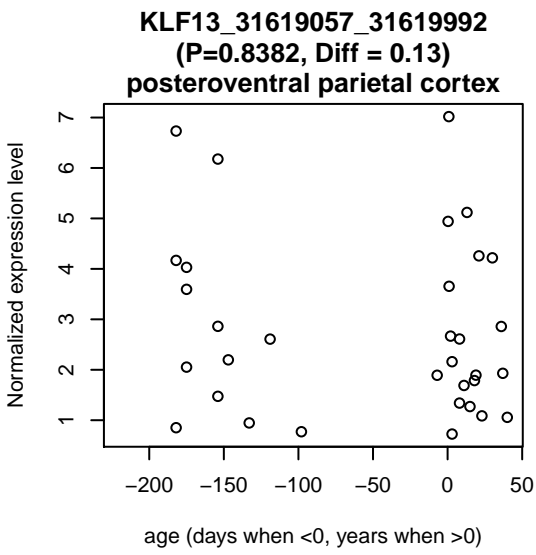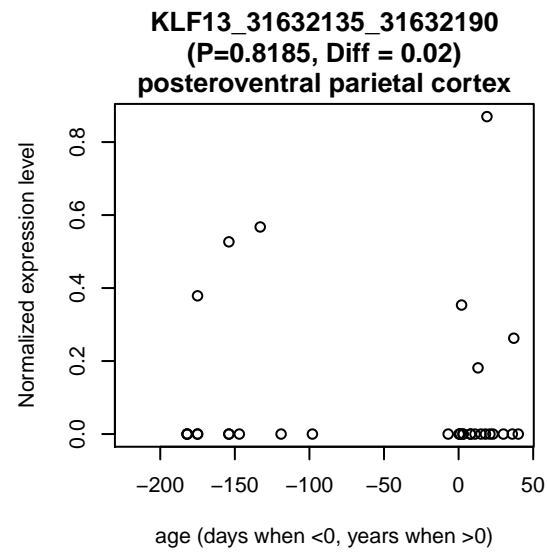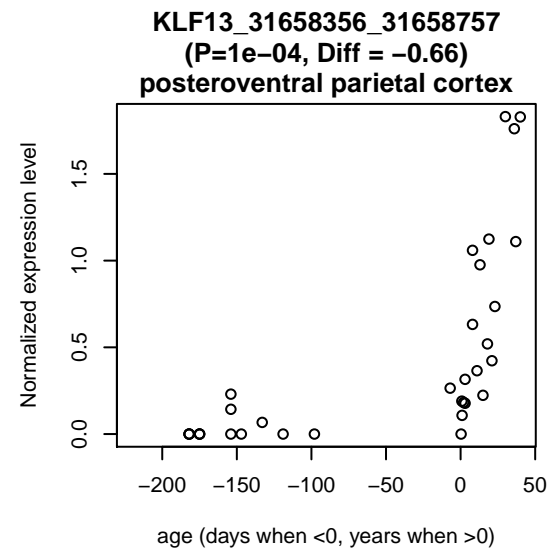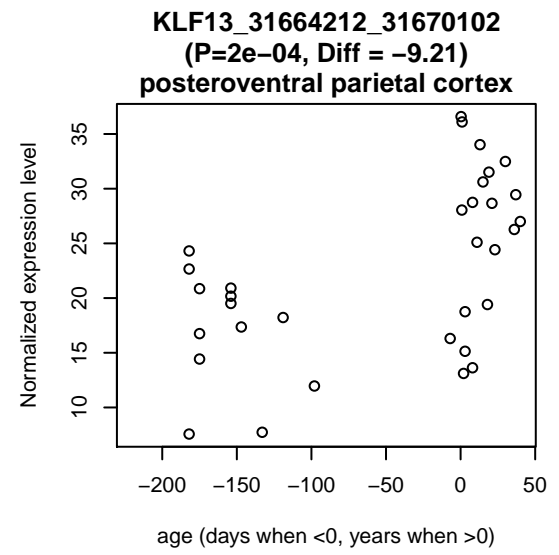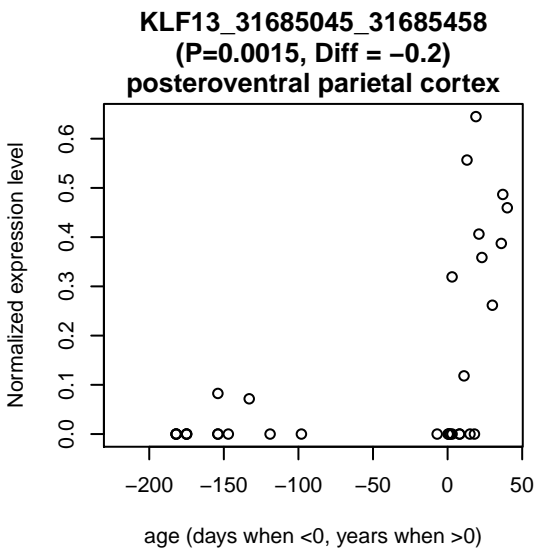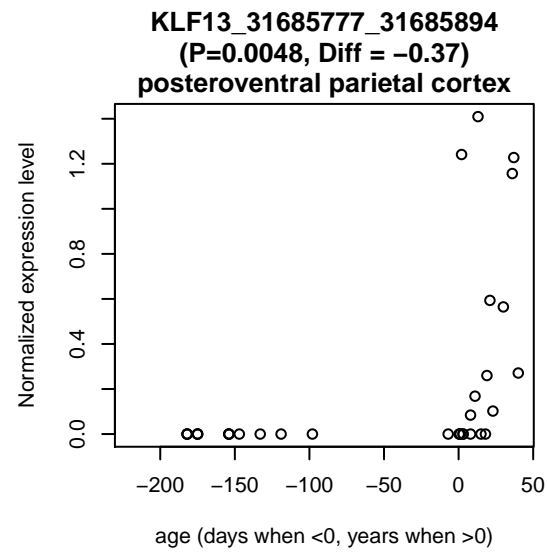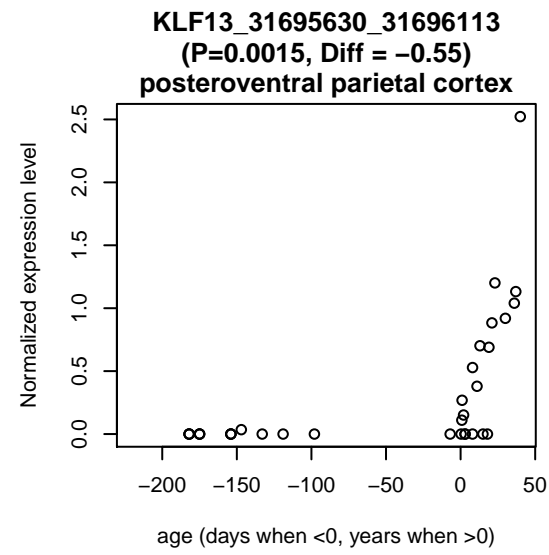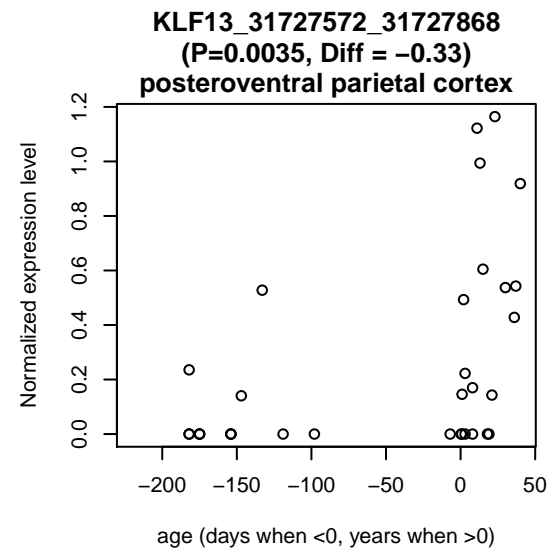

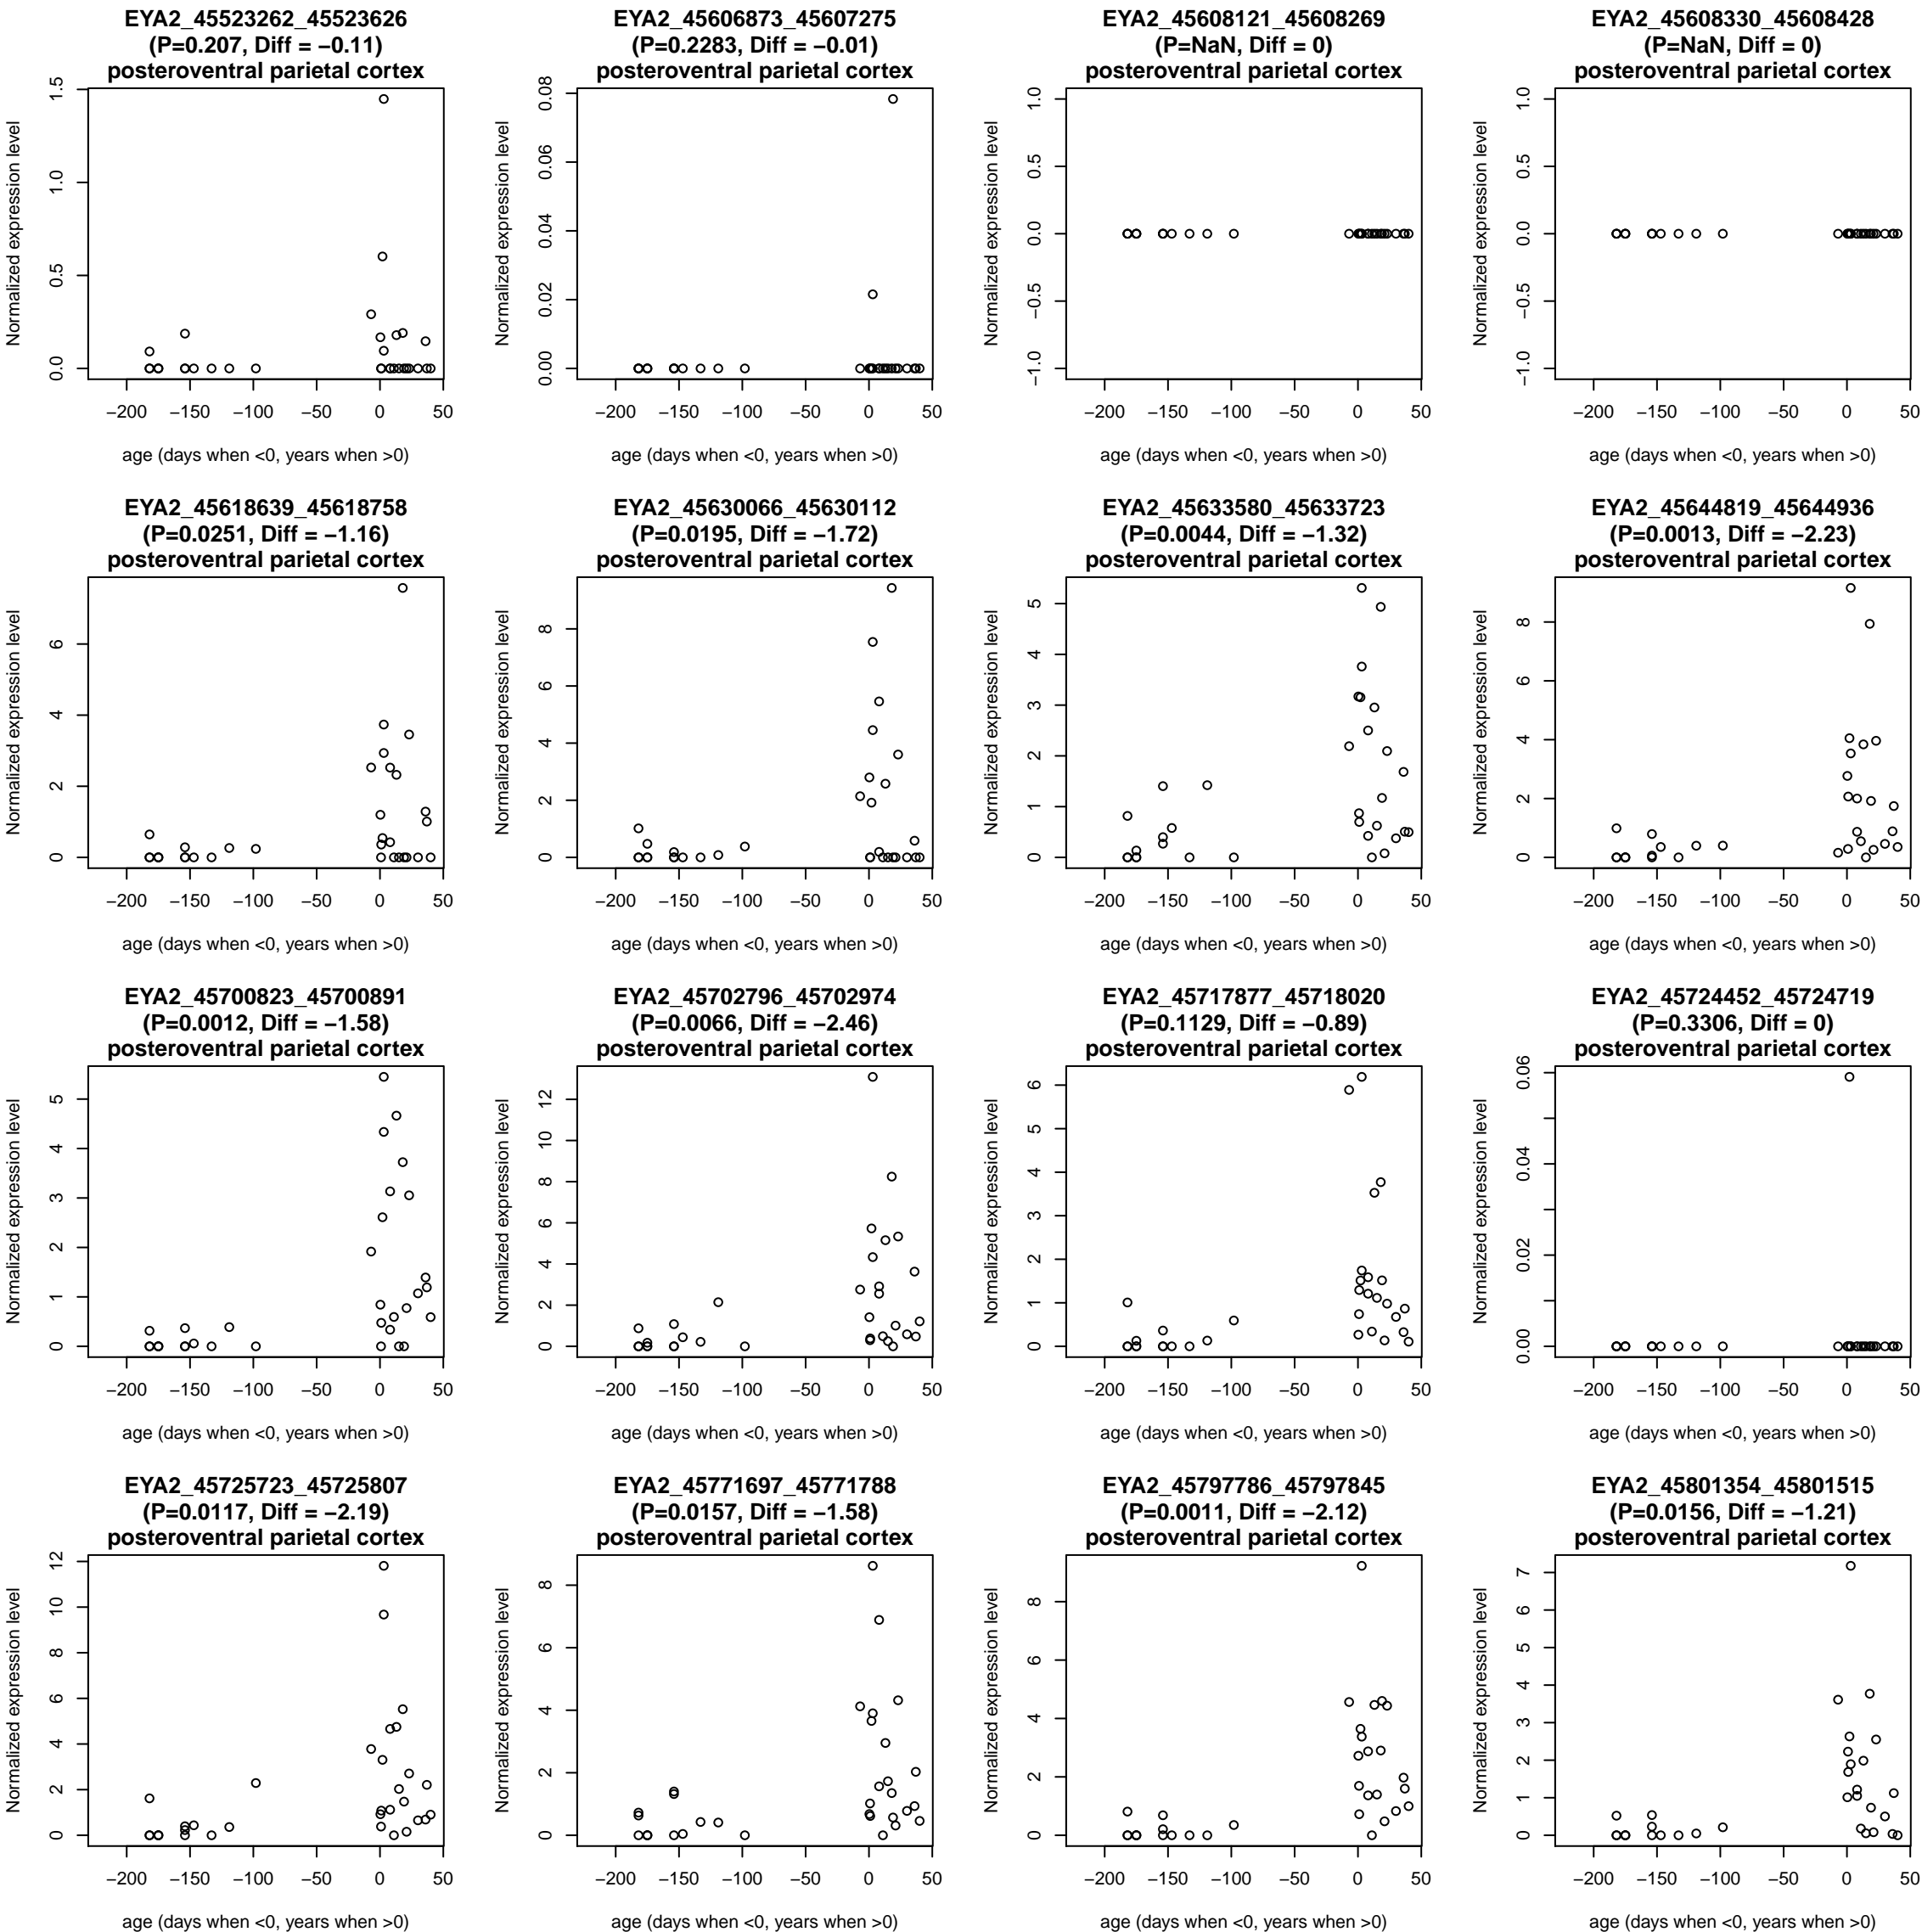

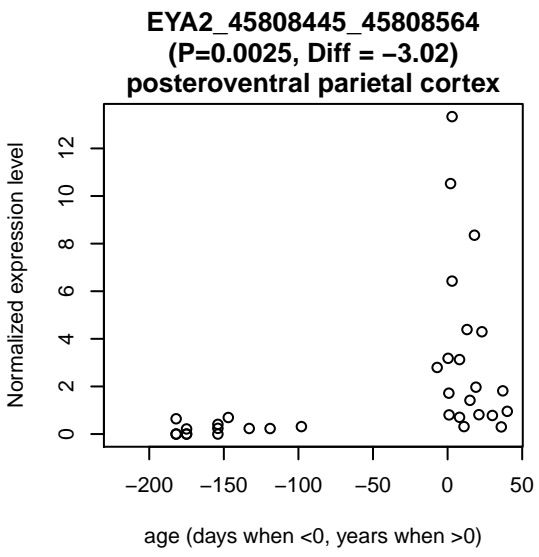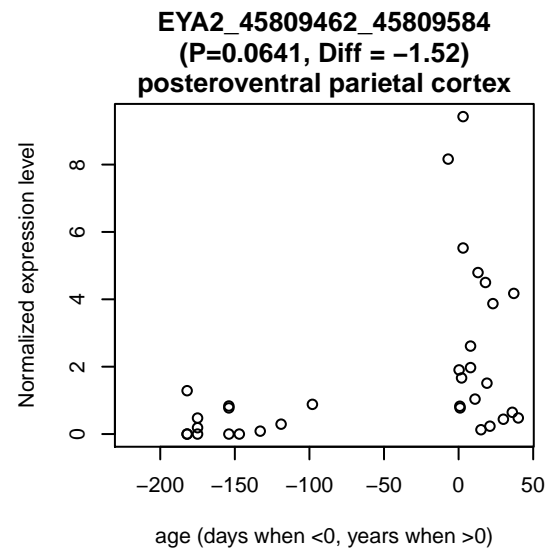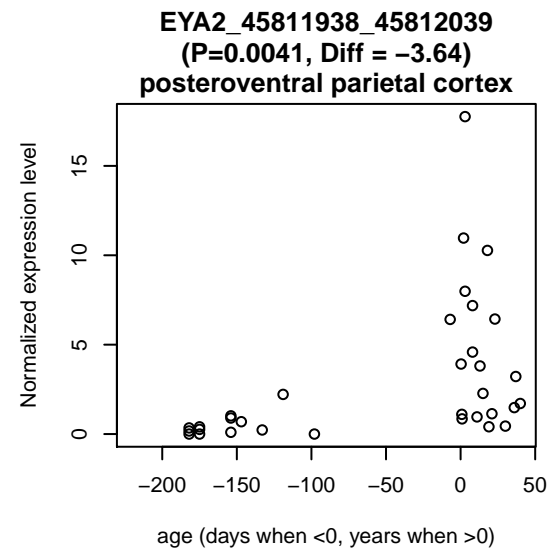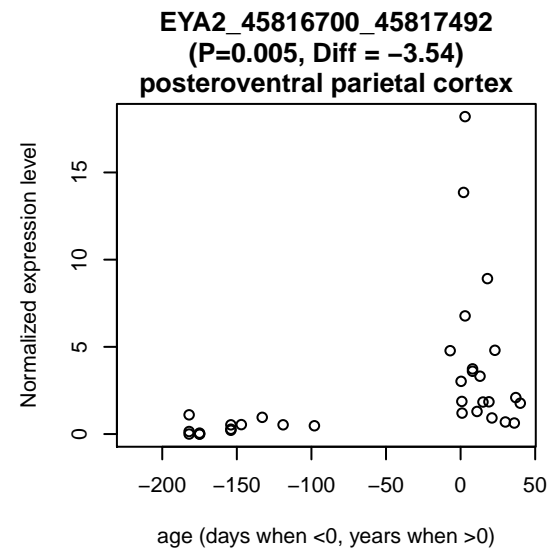

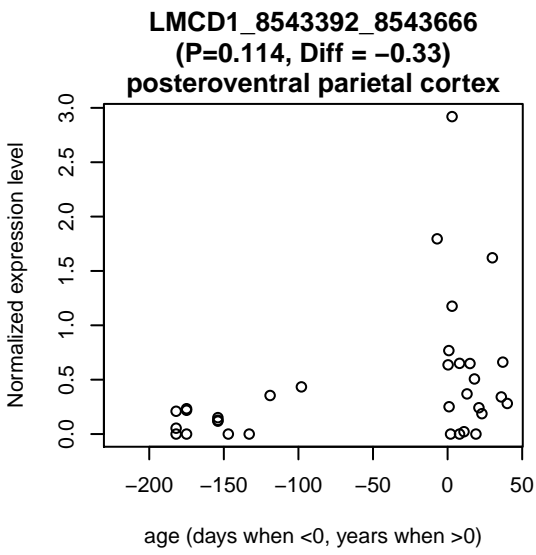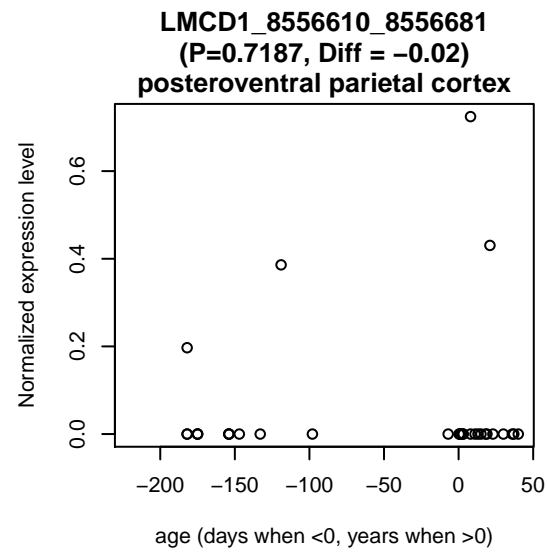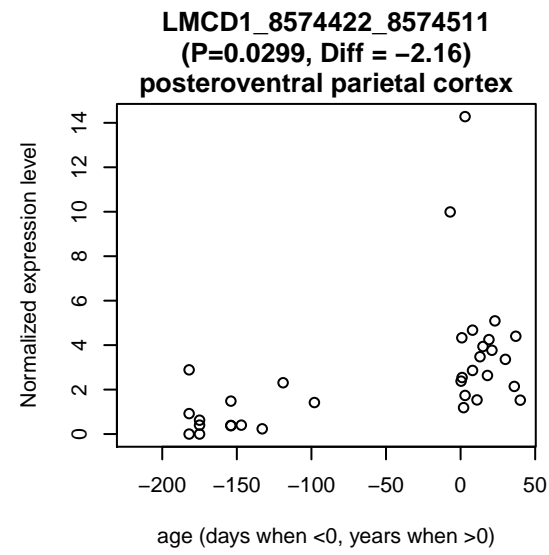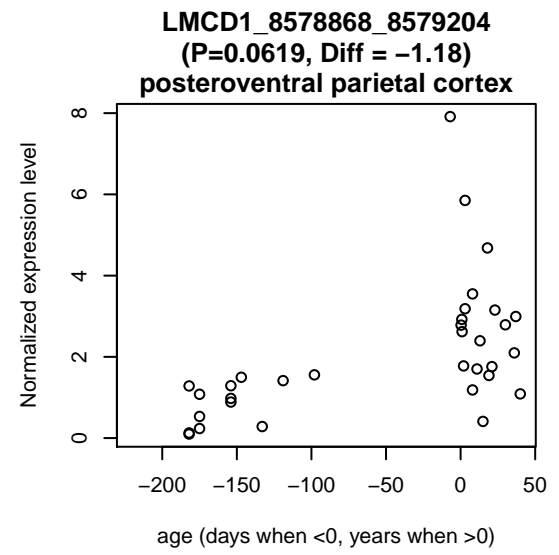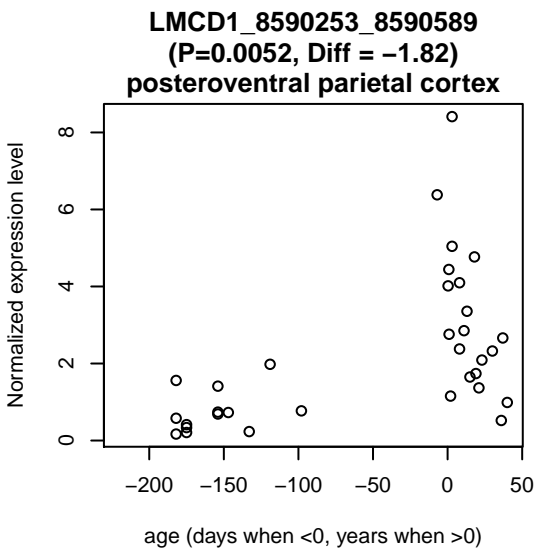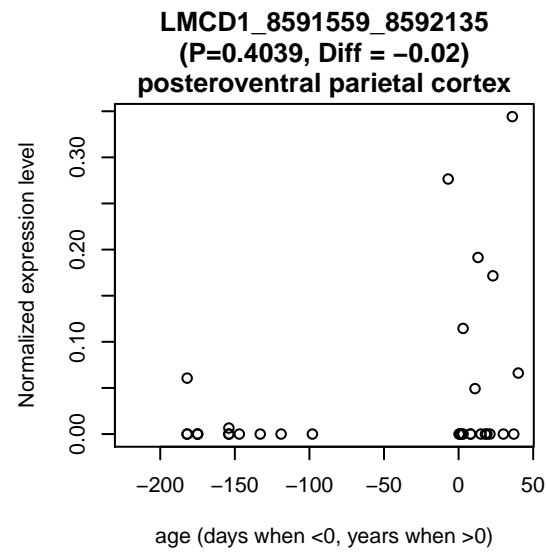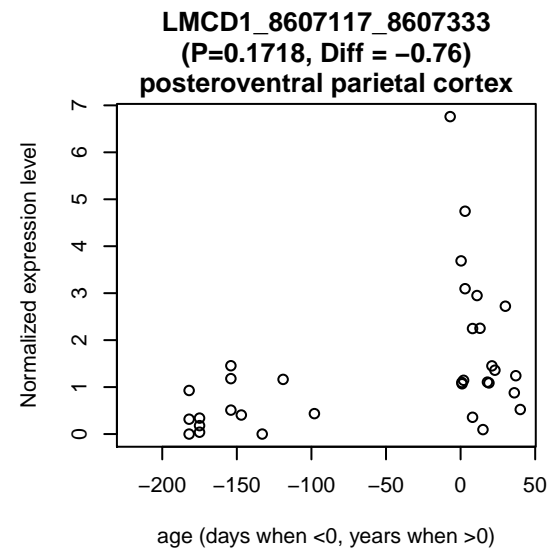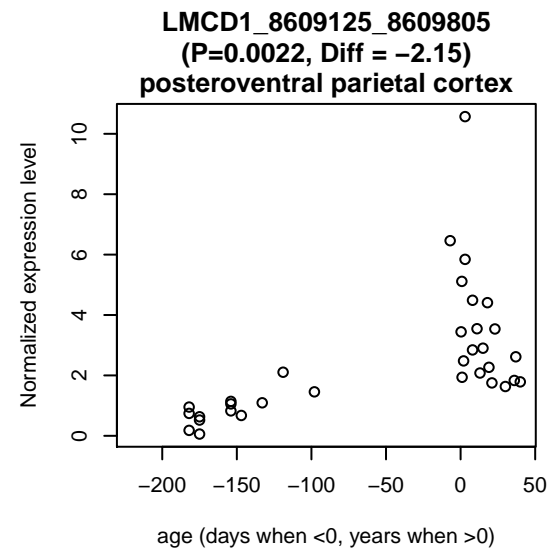

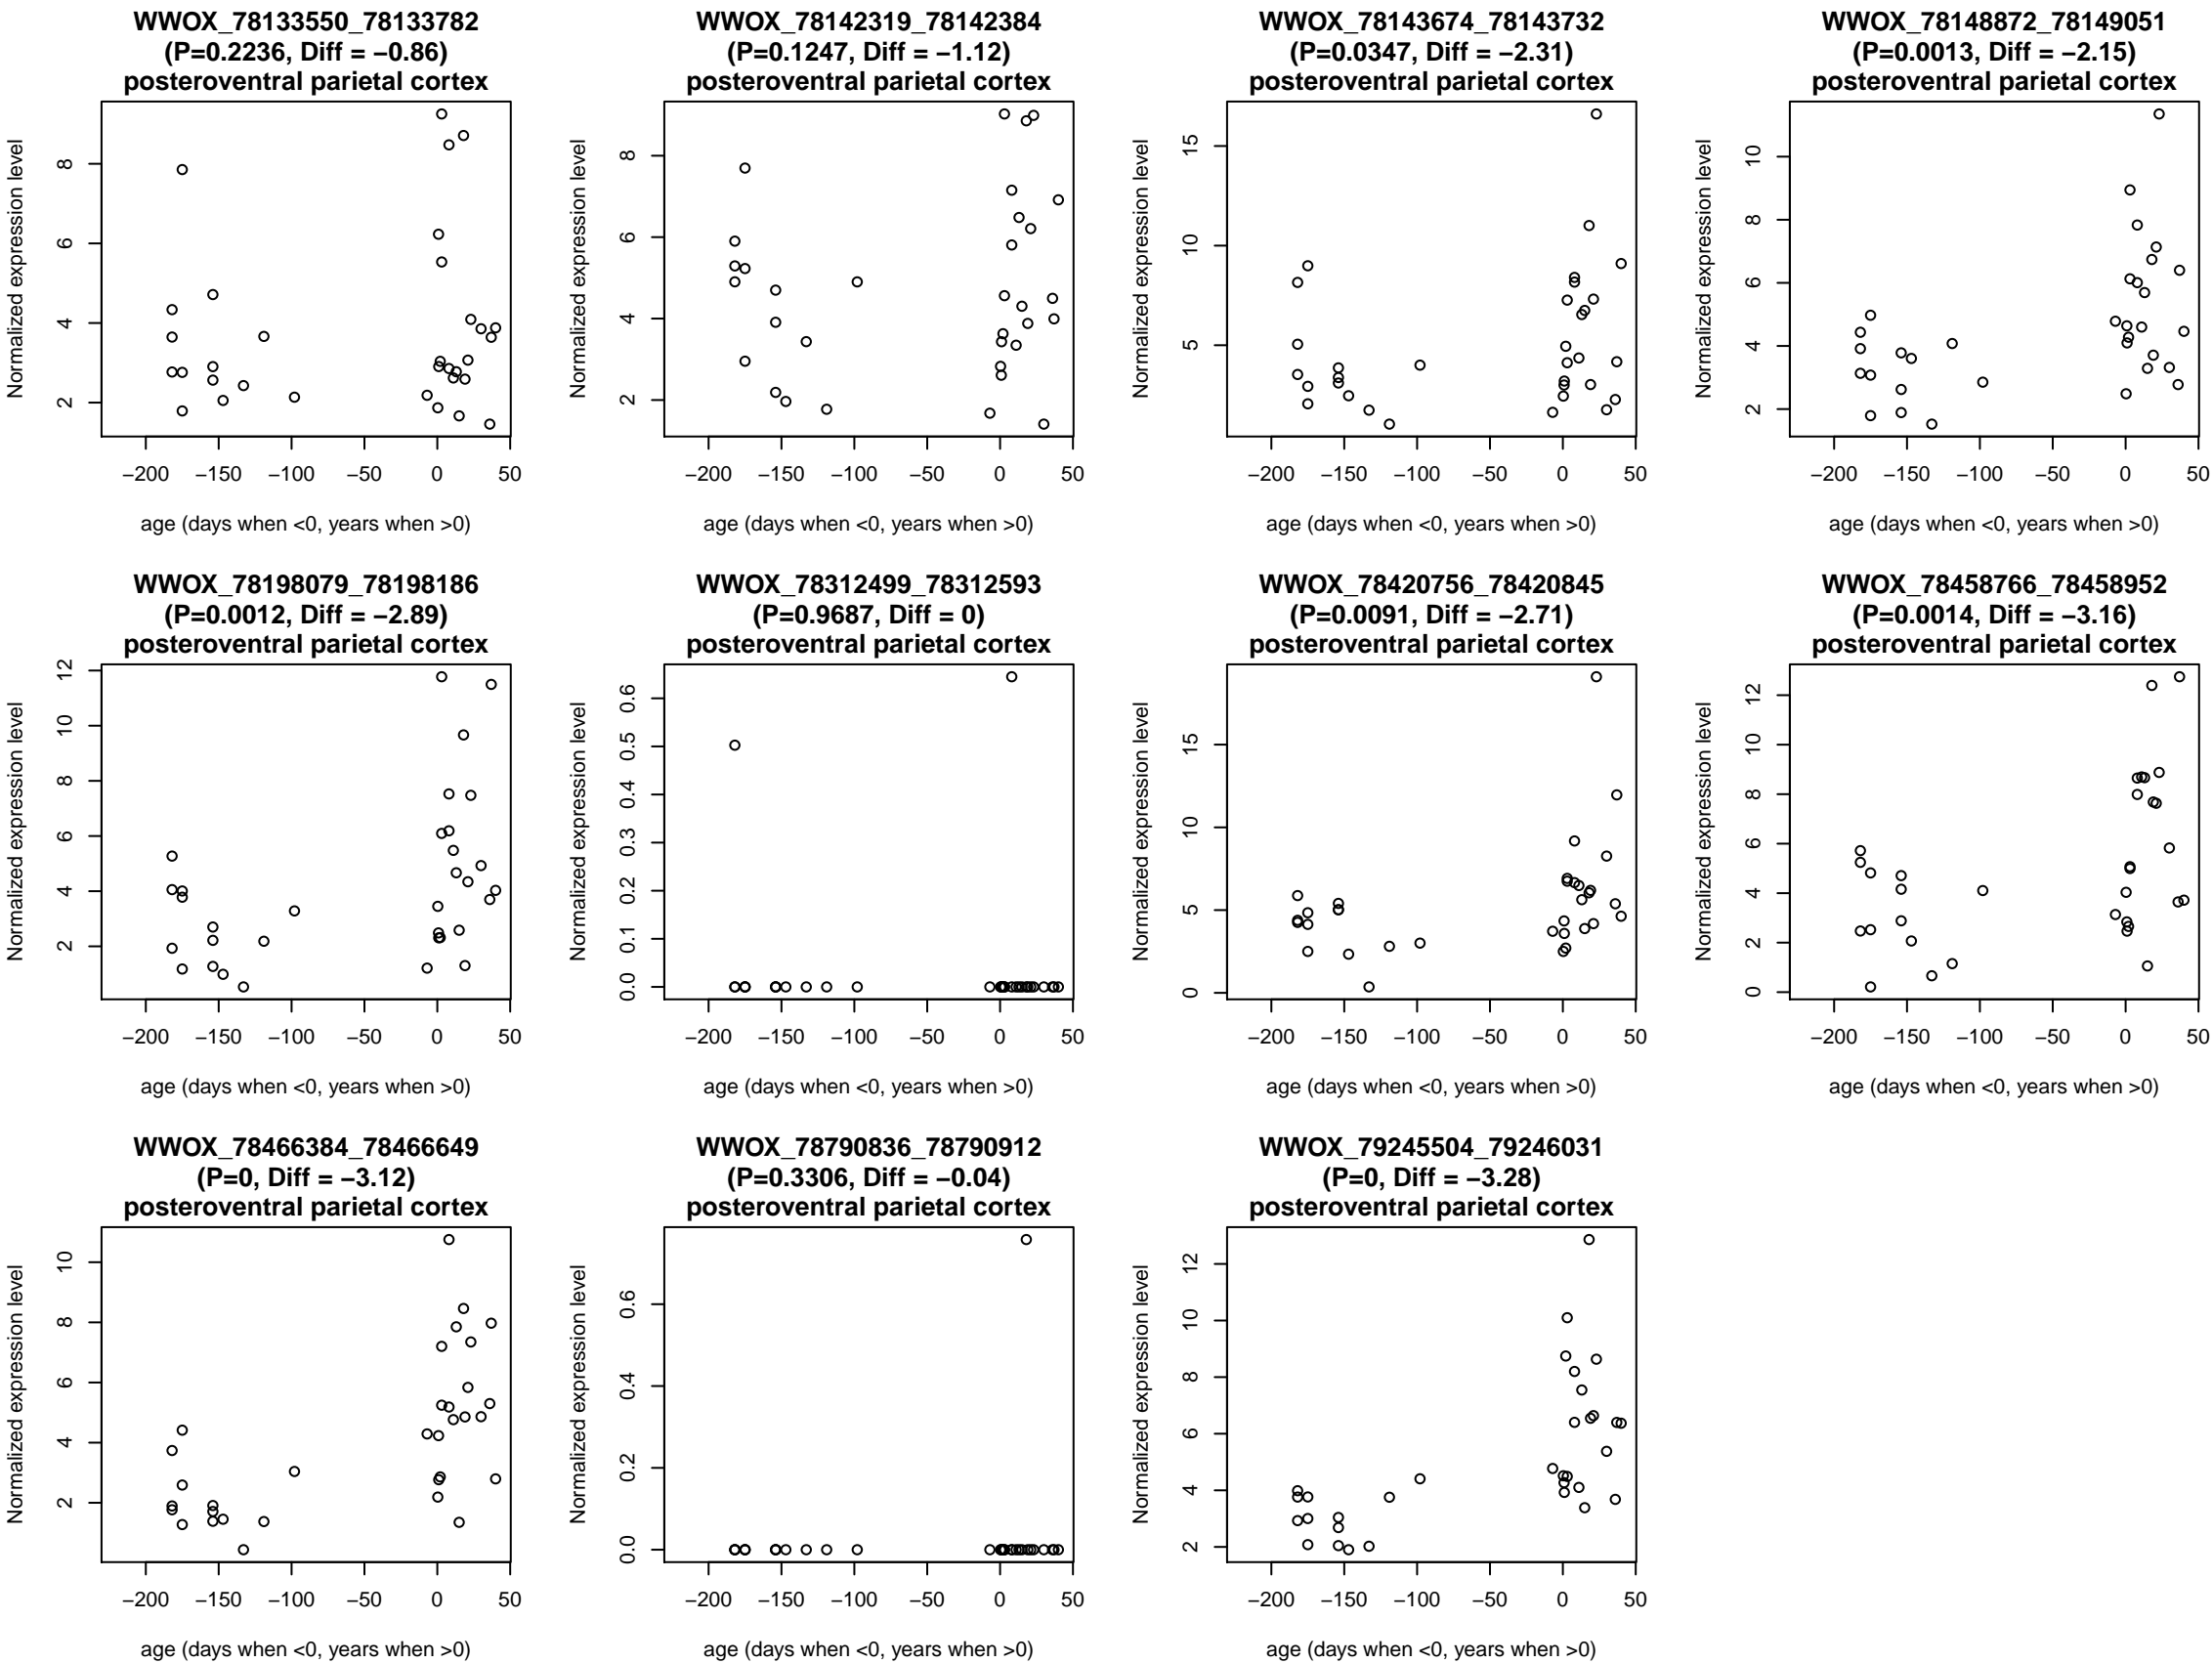

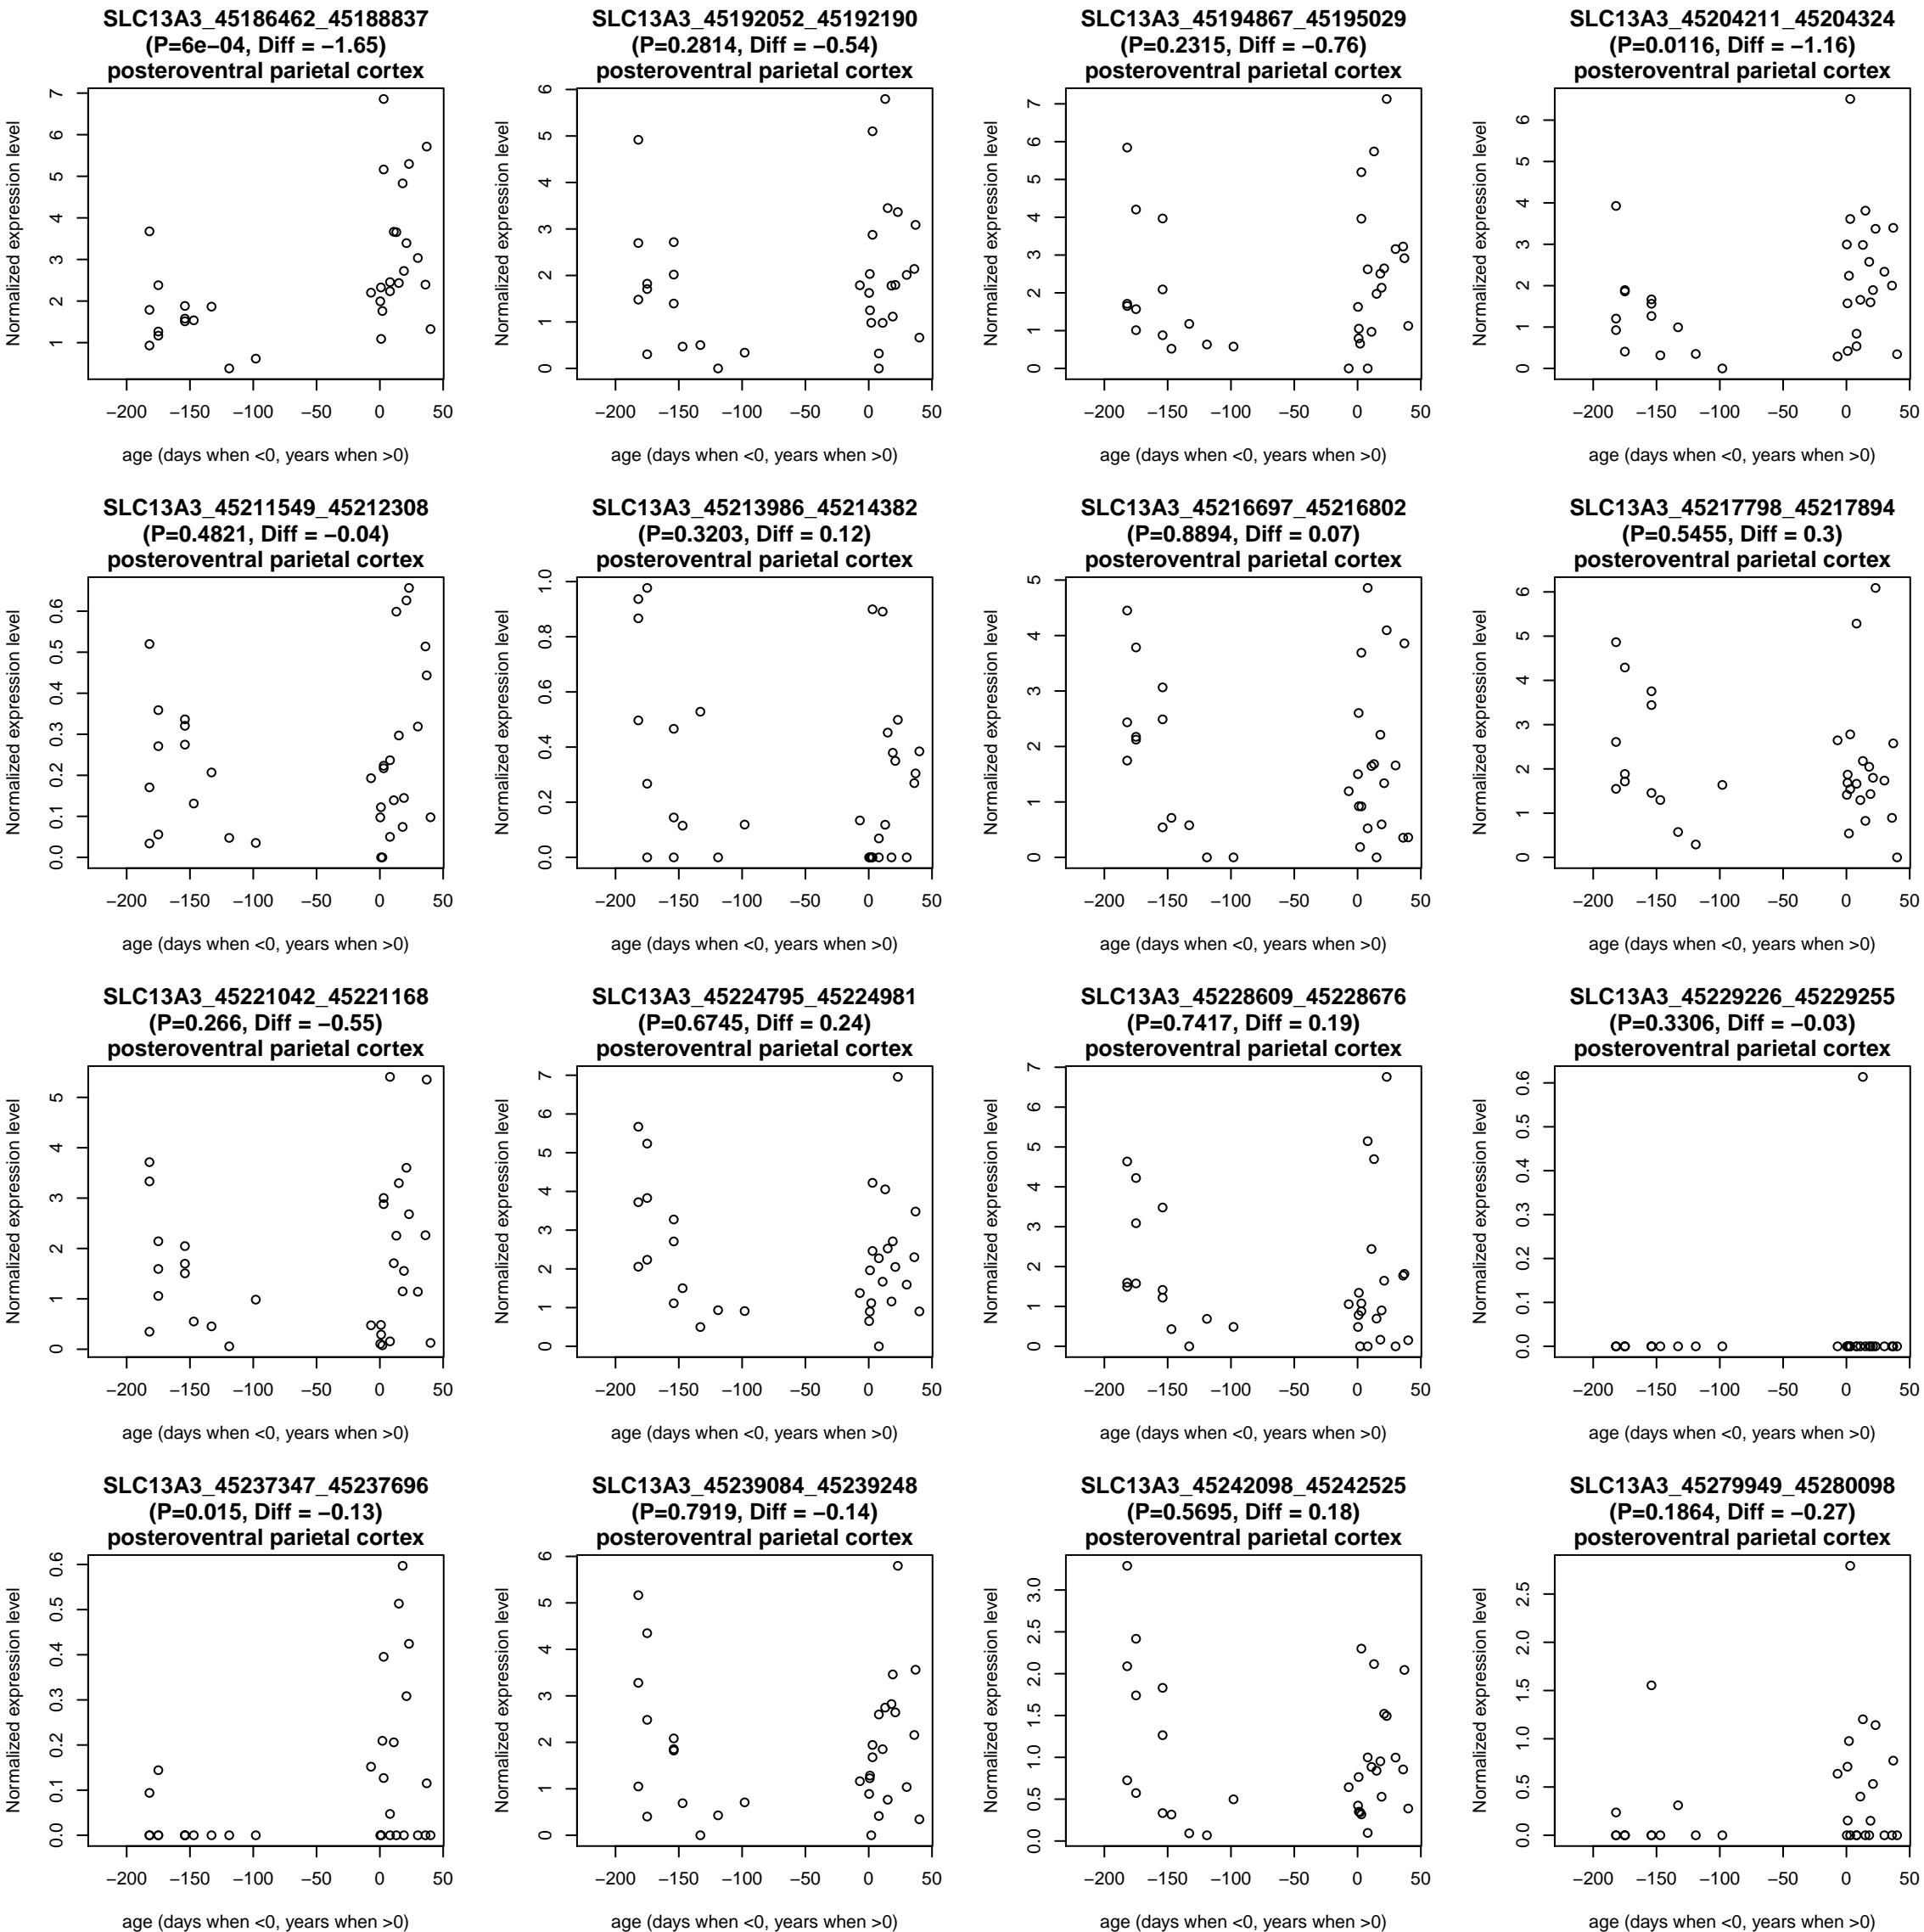



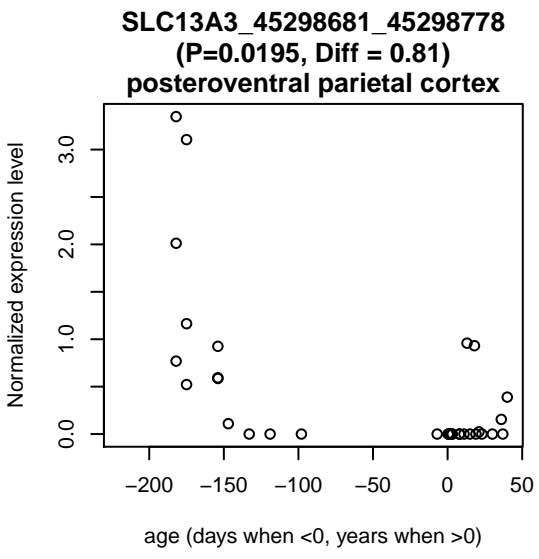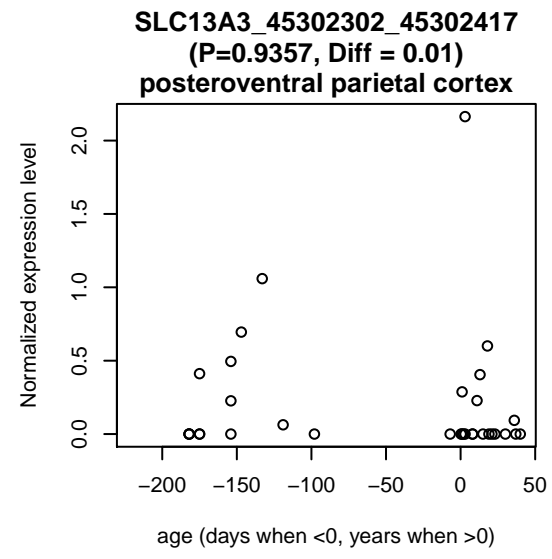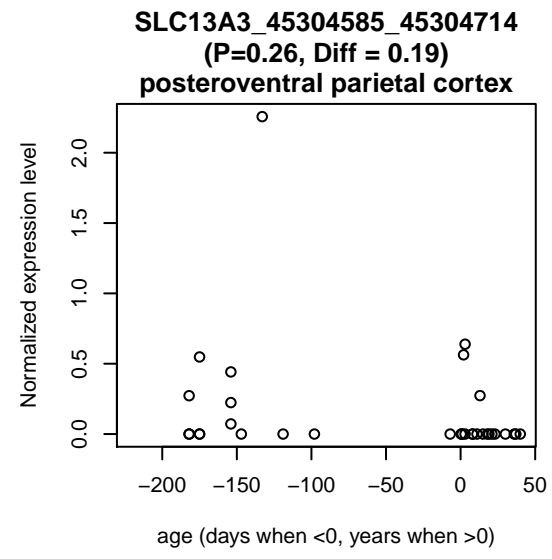

**HTR1B\_78171947\_78173490**  
**(P=1e-04, Diff = -0.61)**  
**posteroventral parietal cortex**

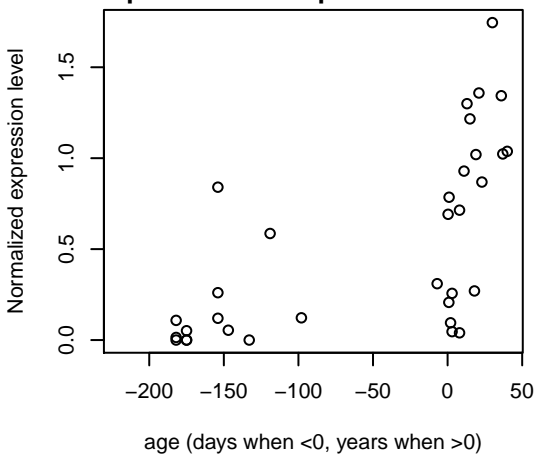

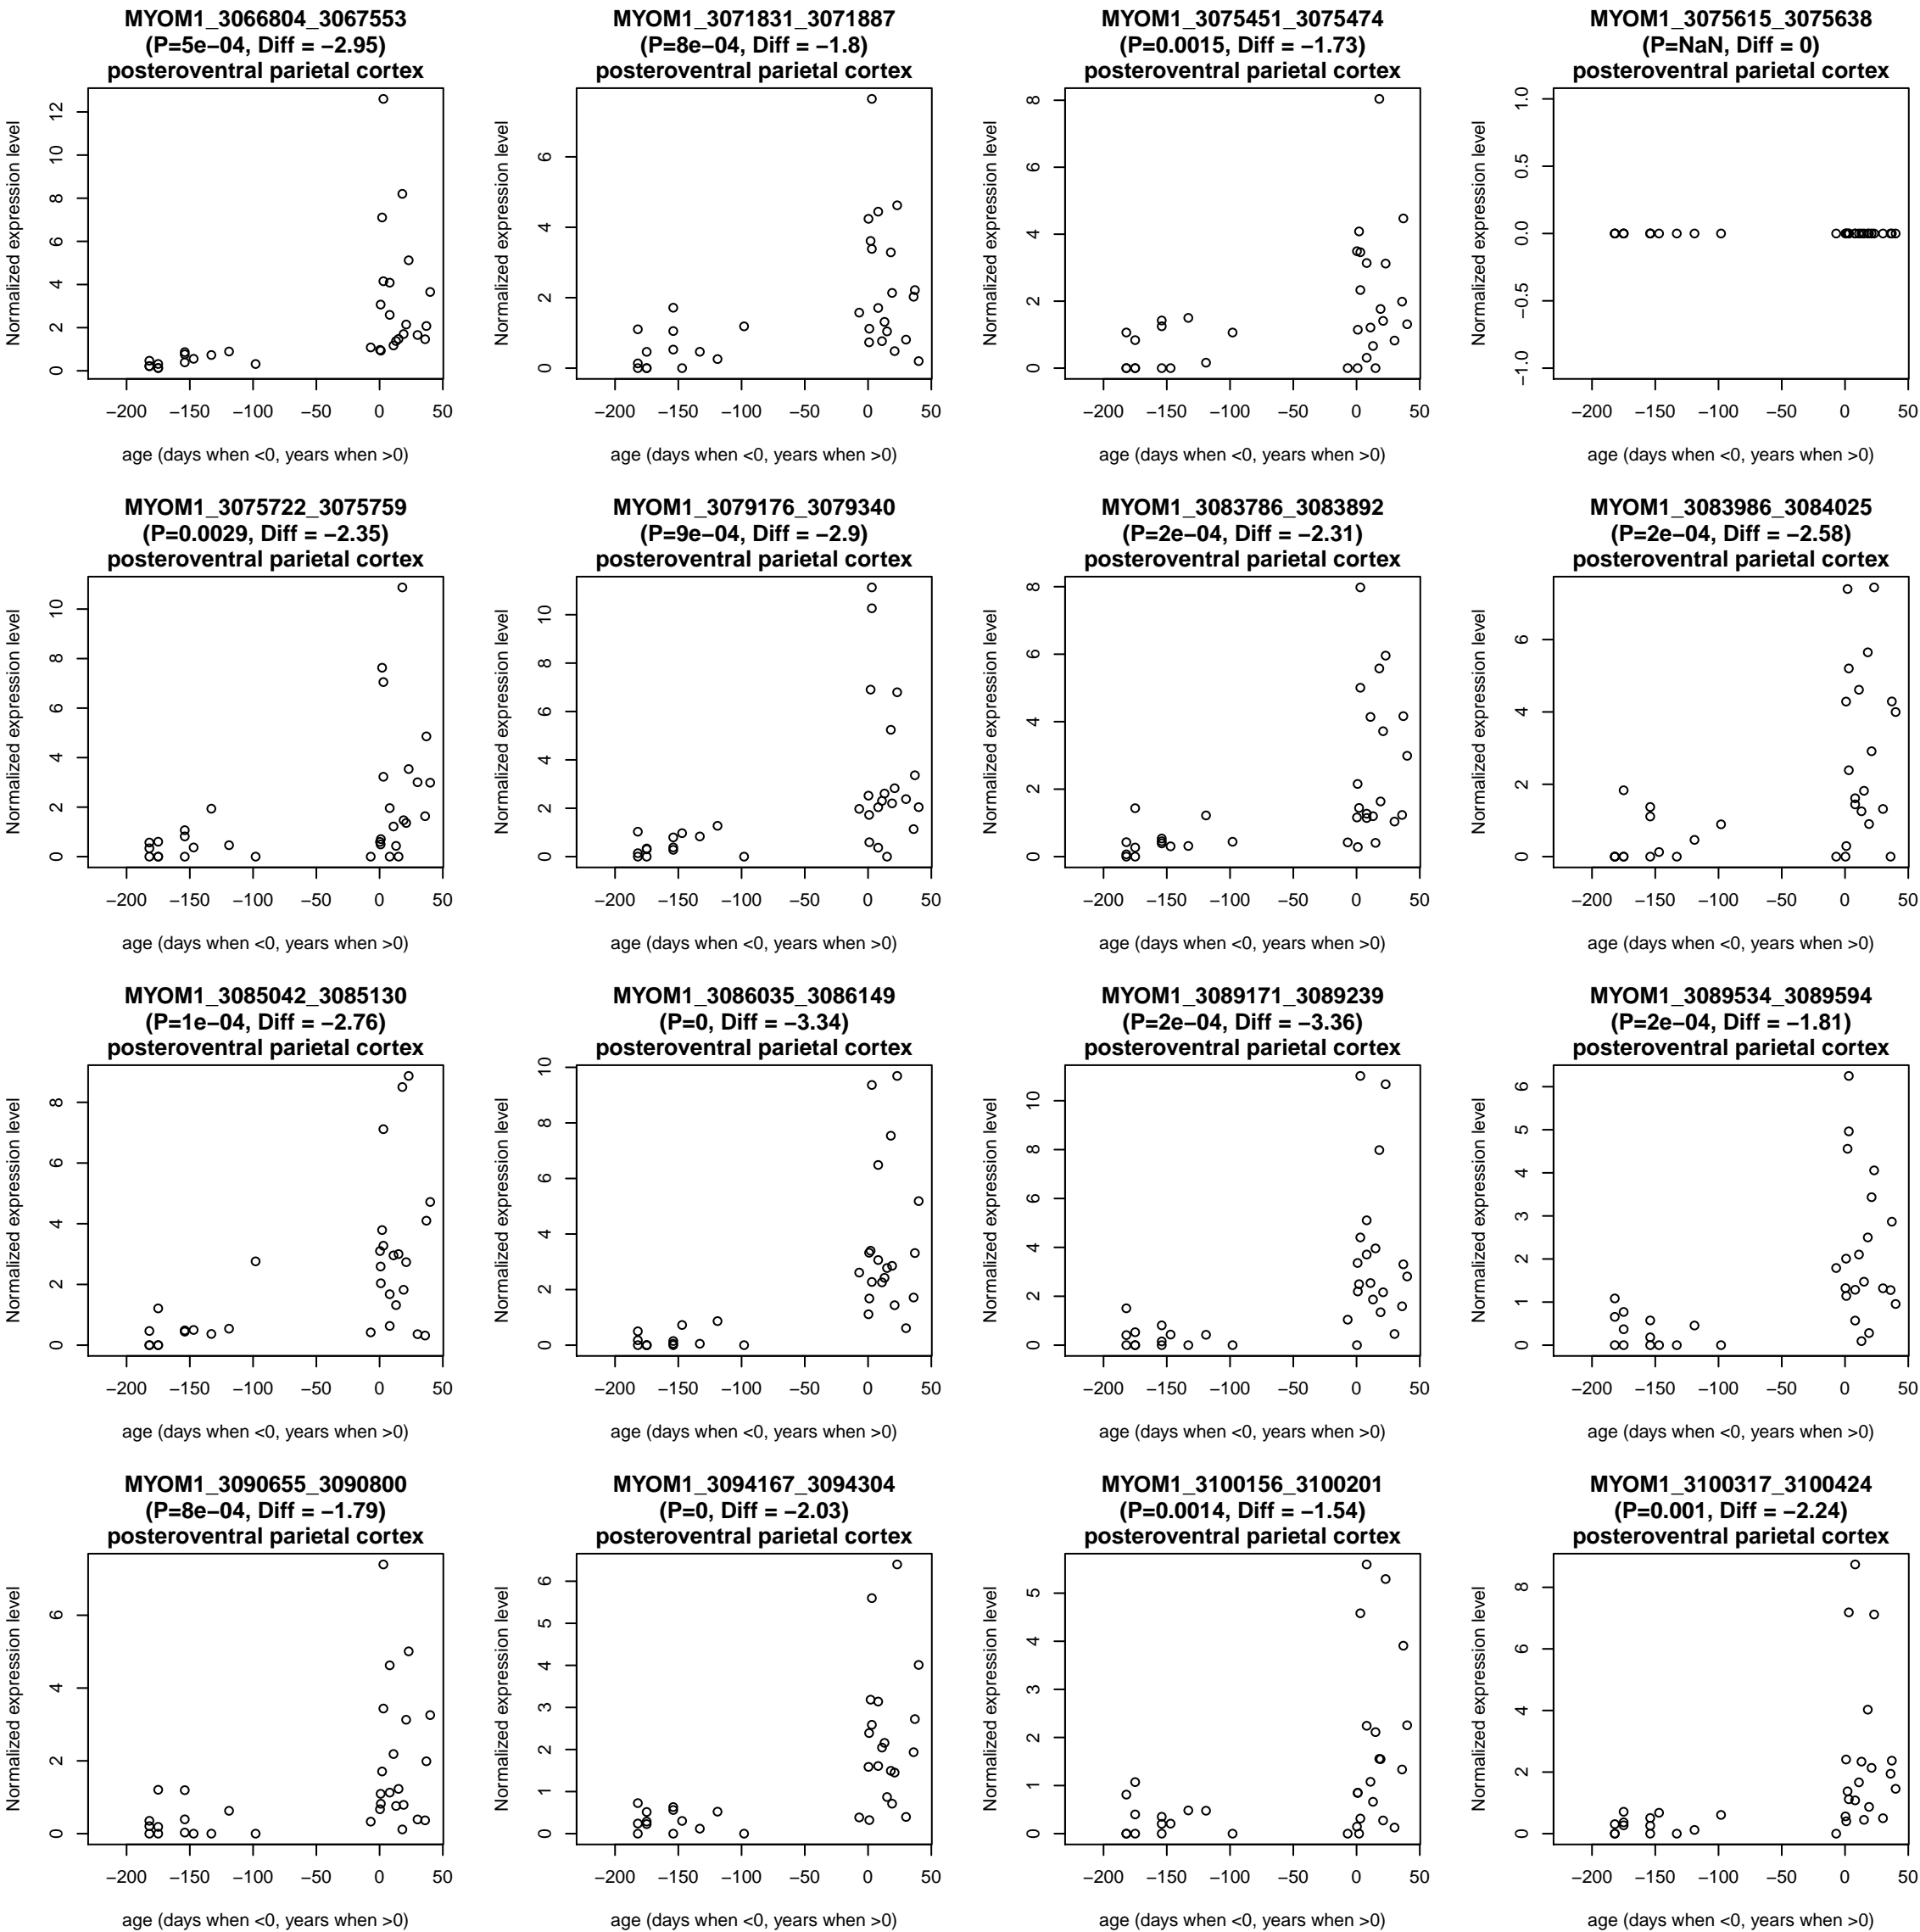

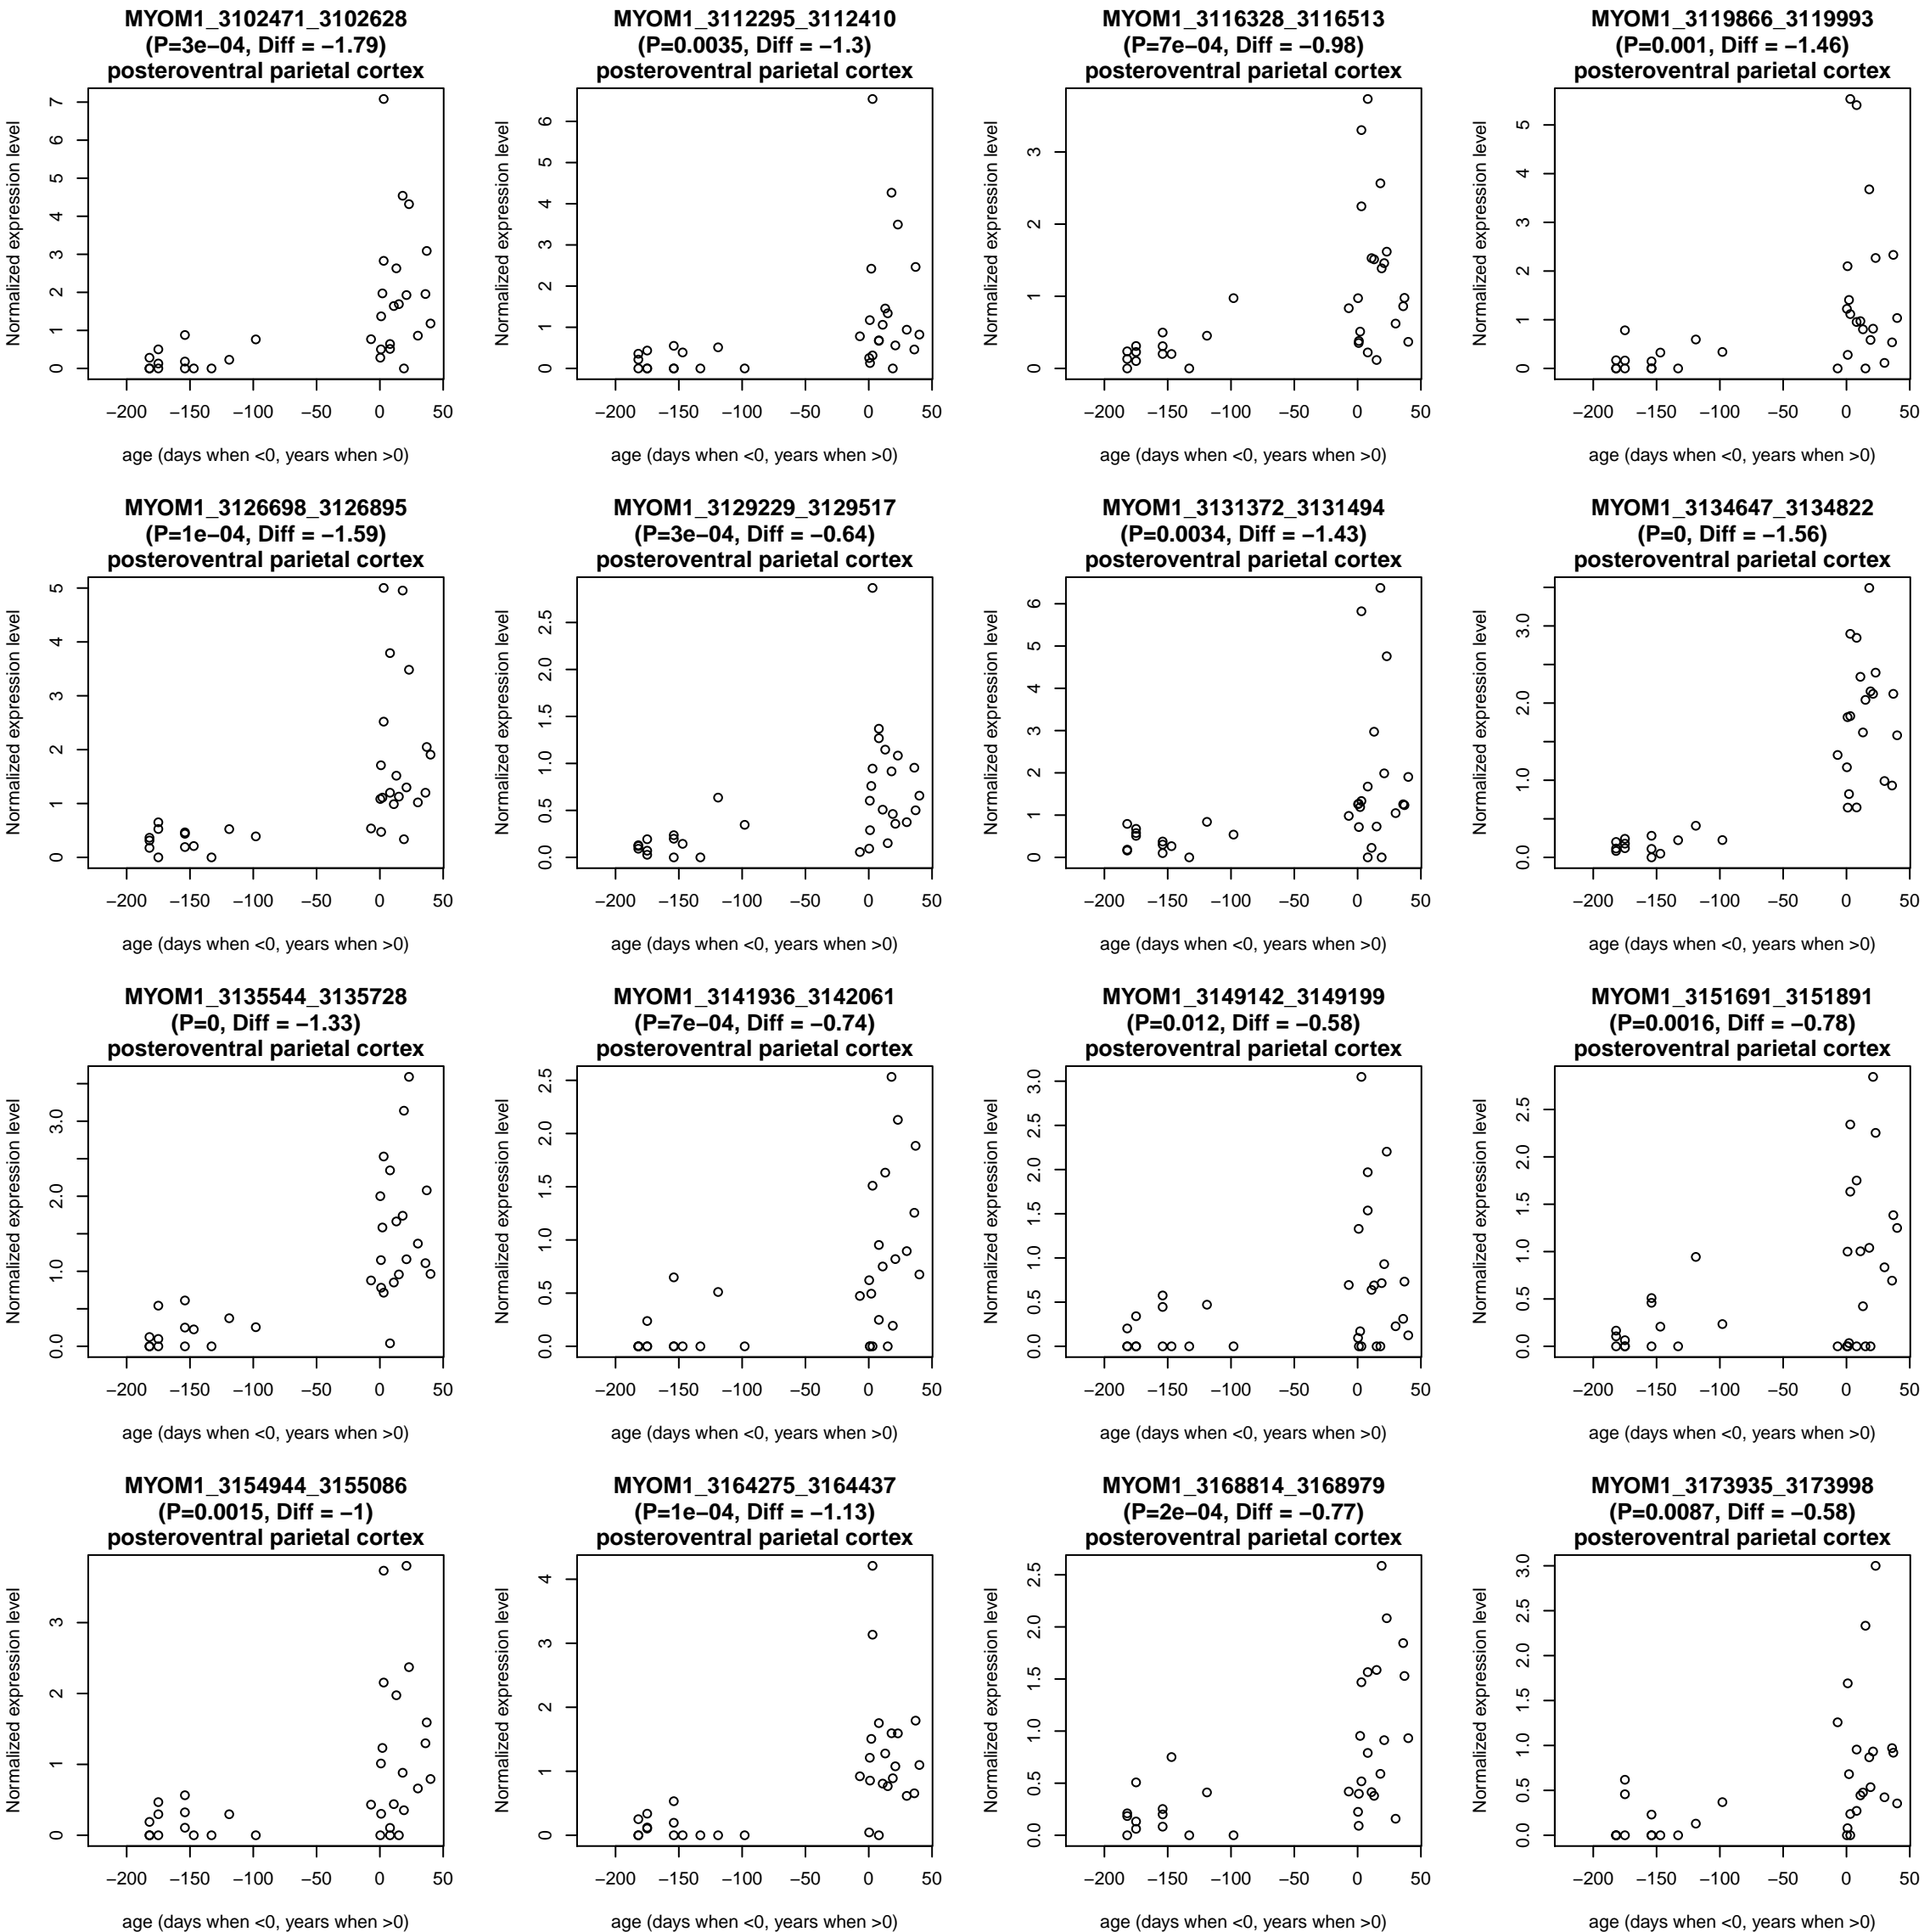

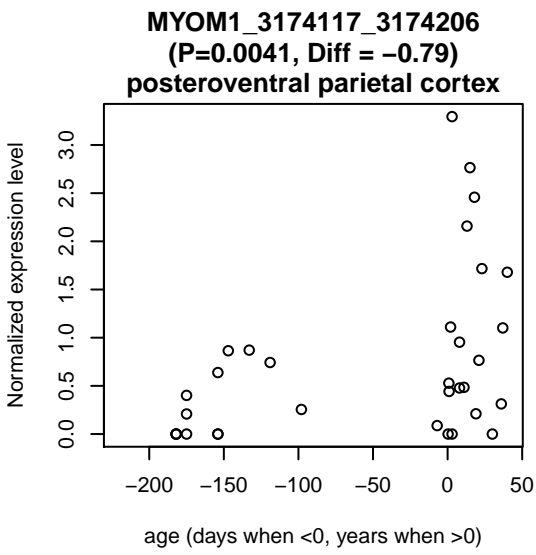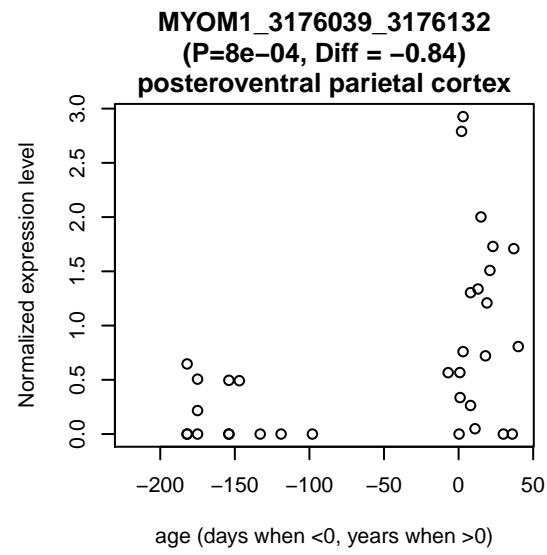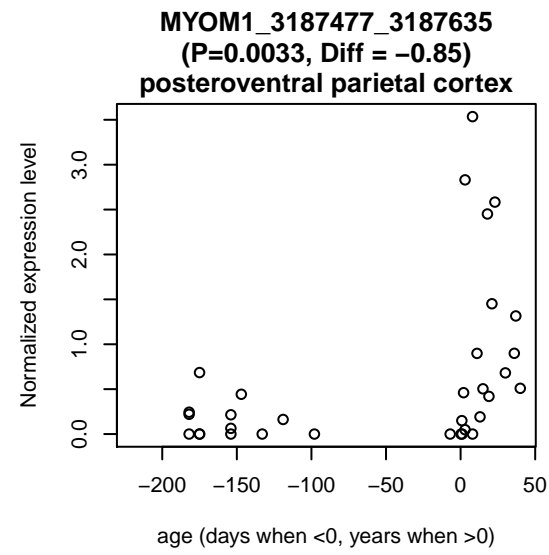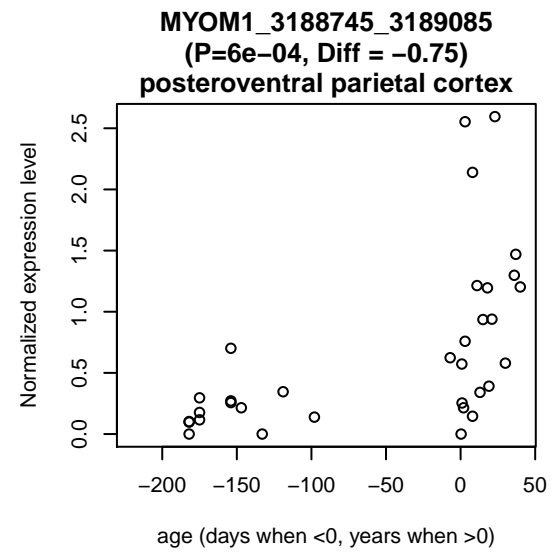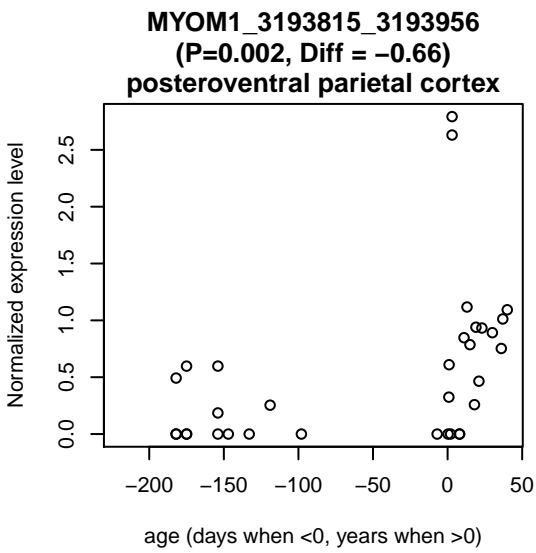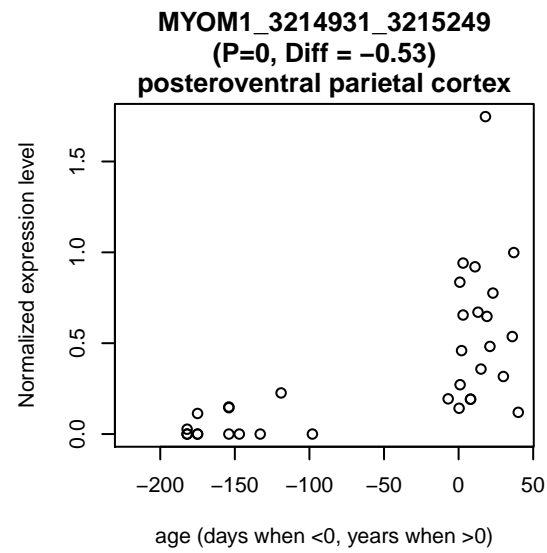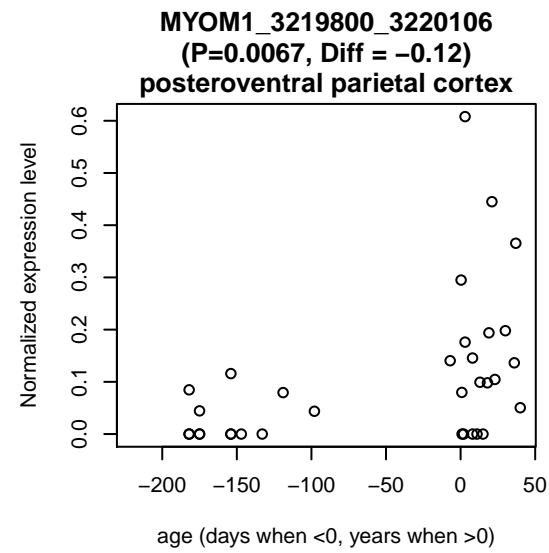

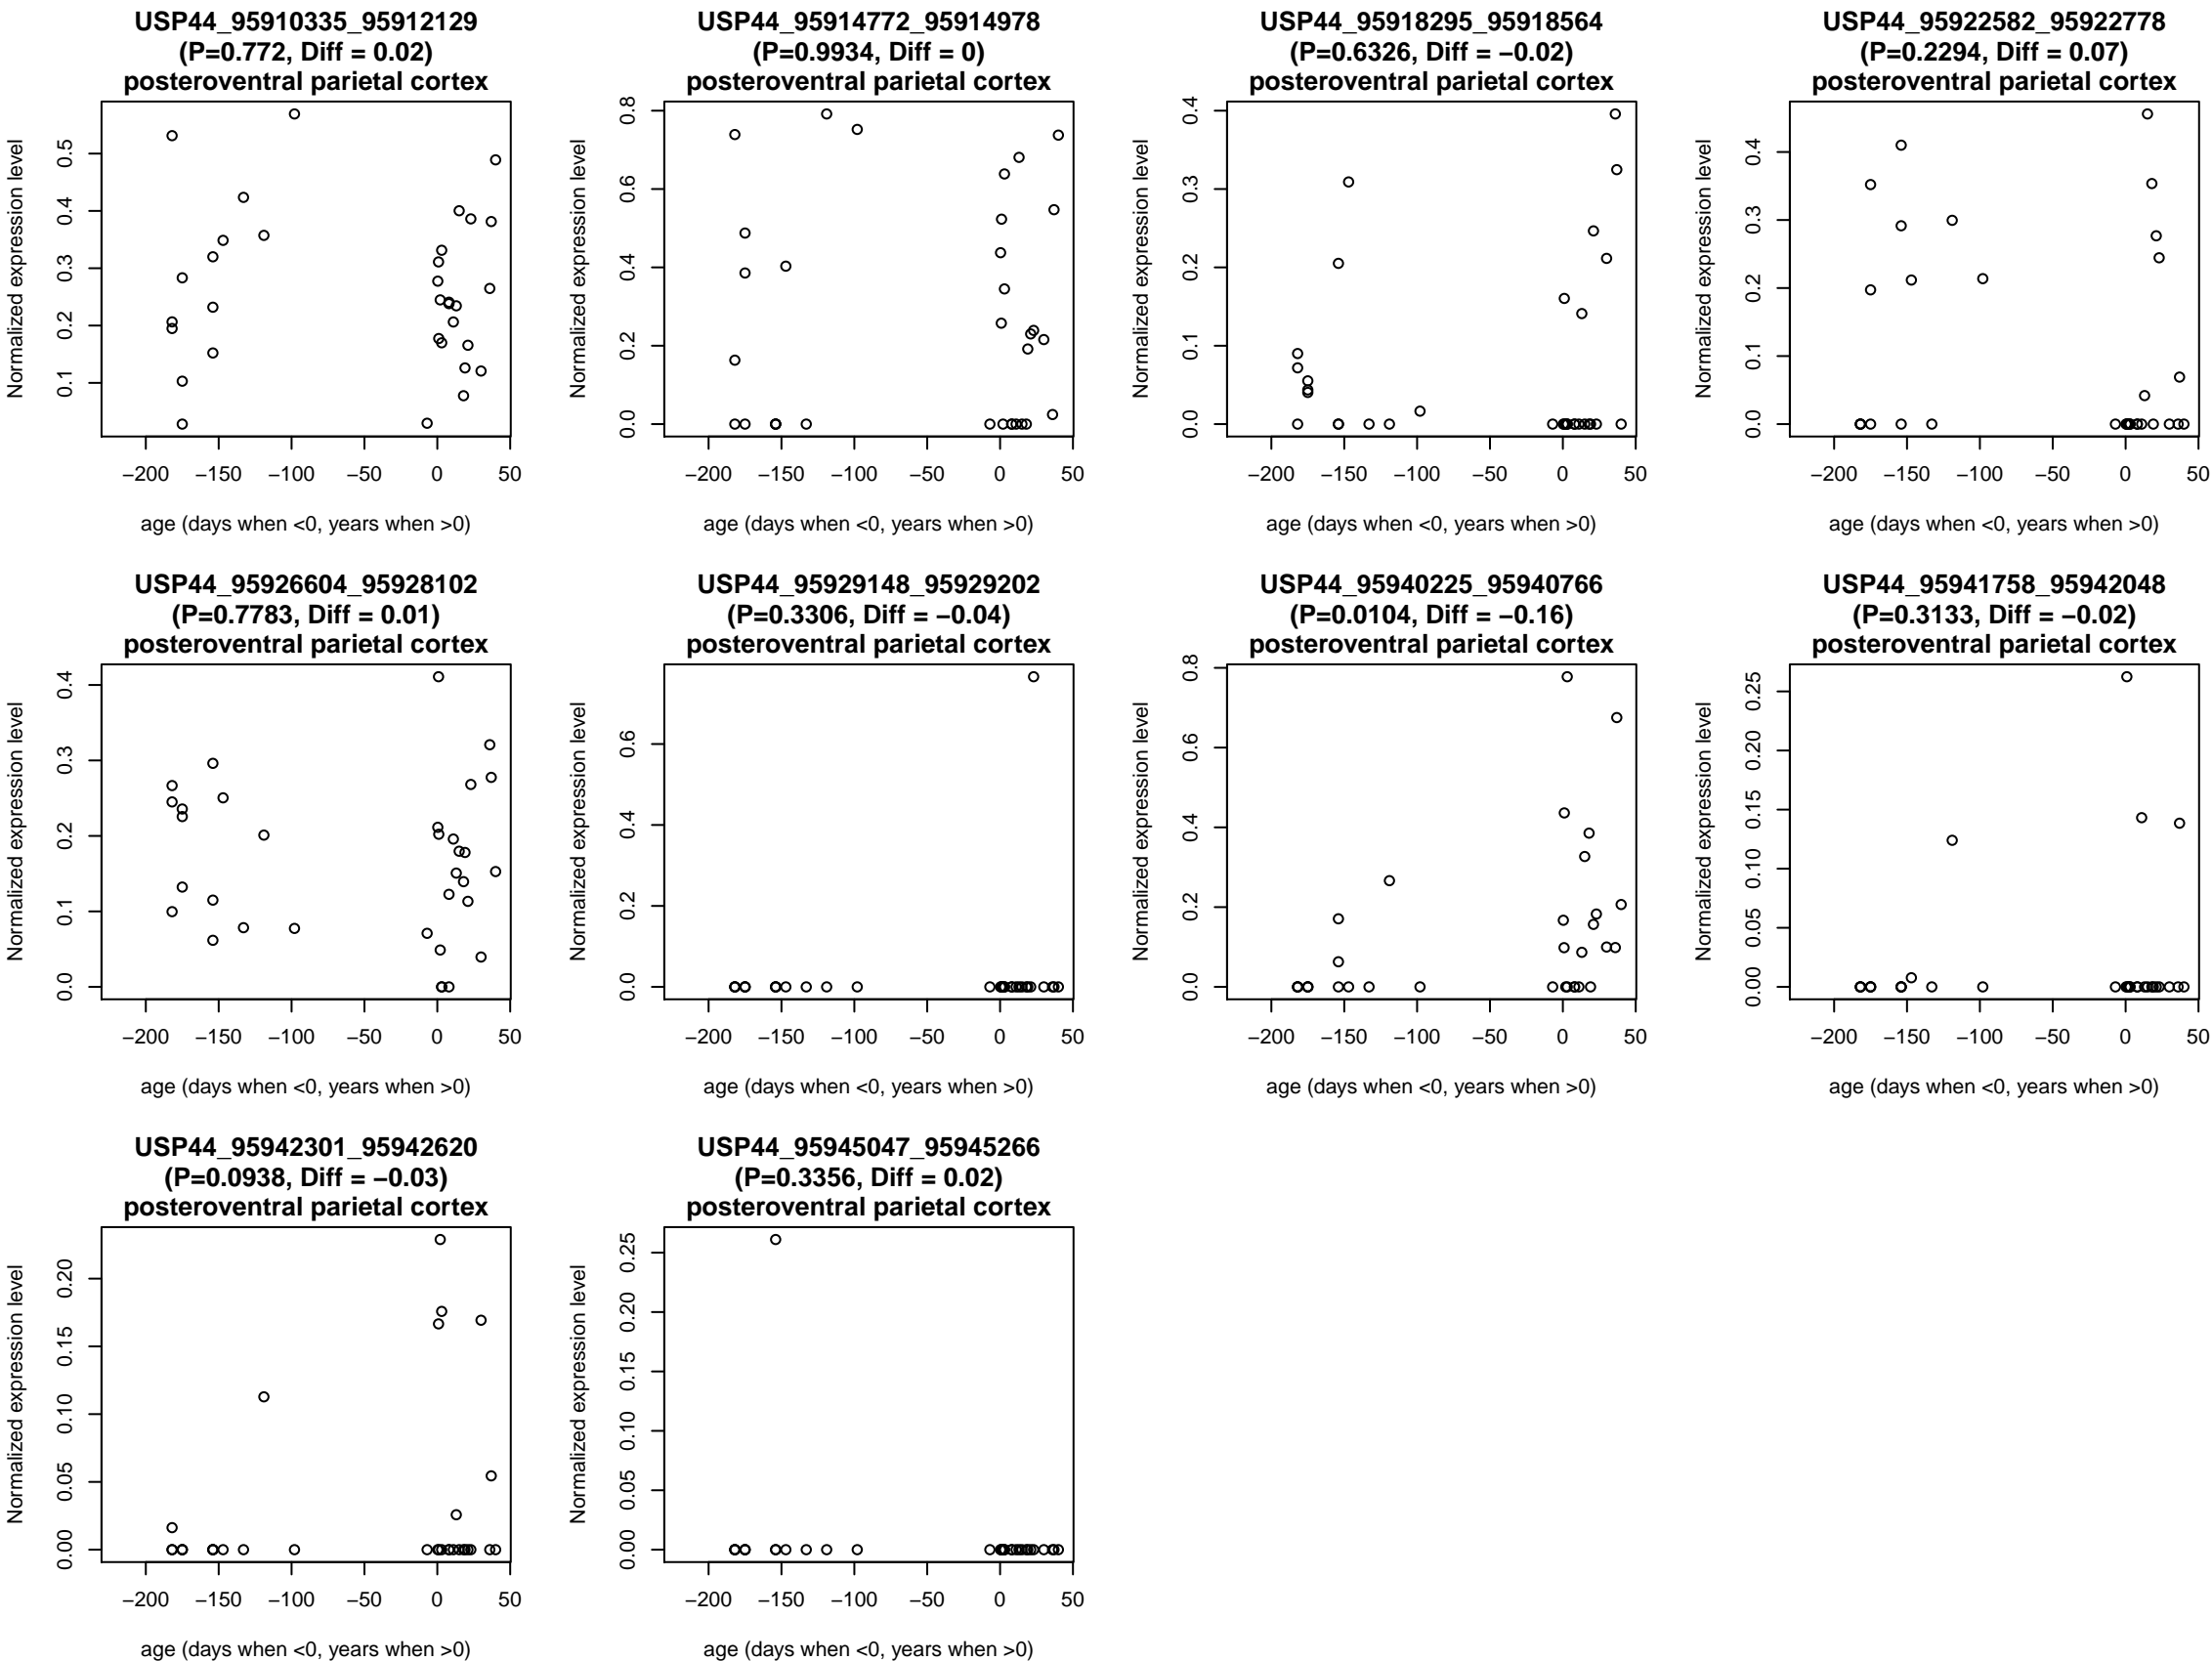

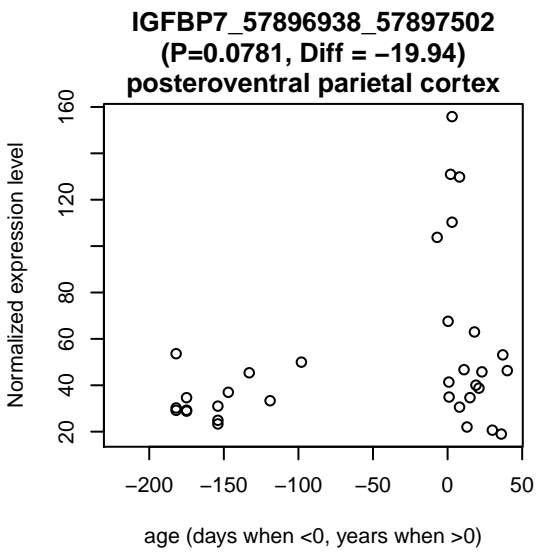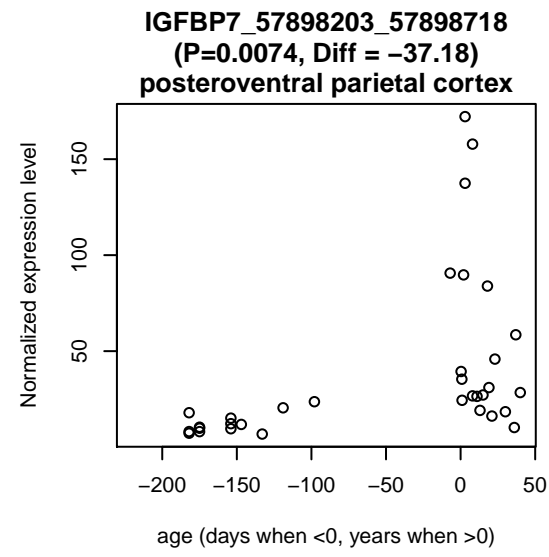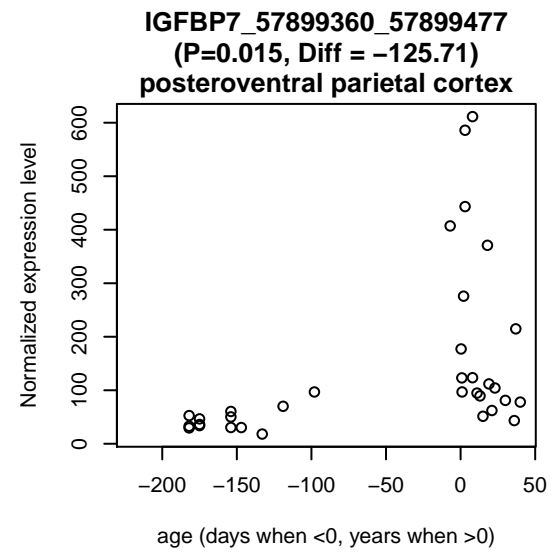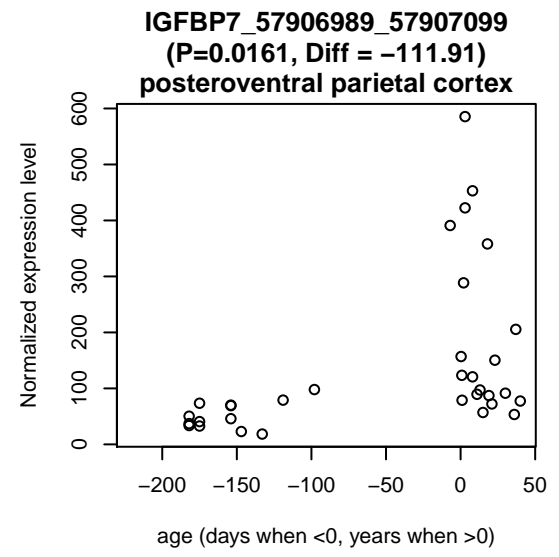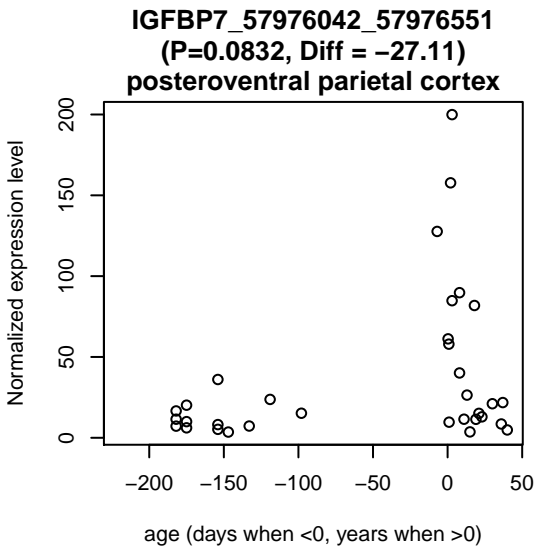

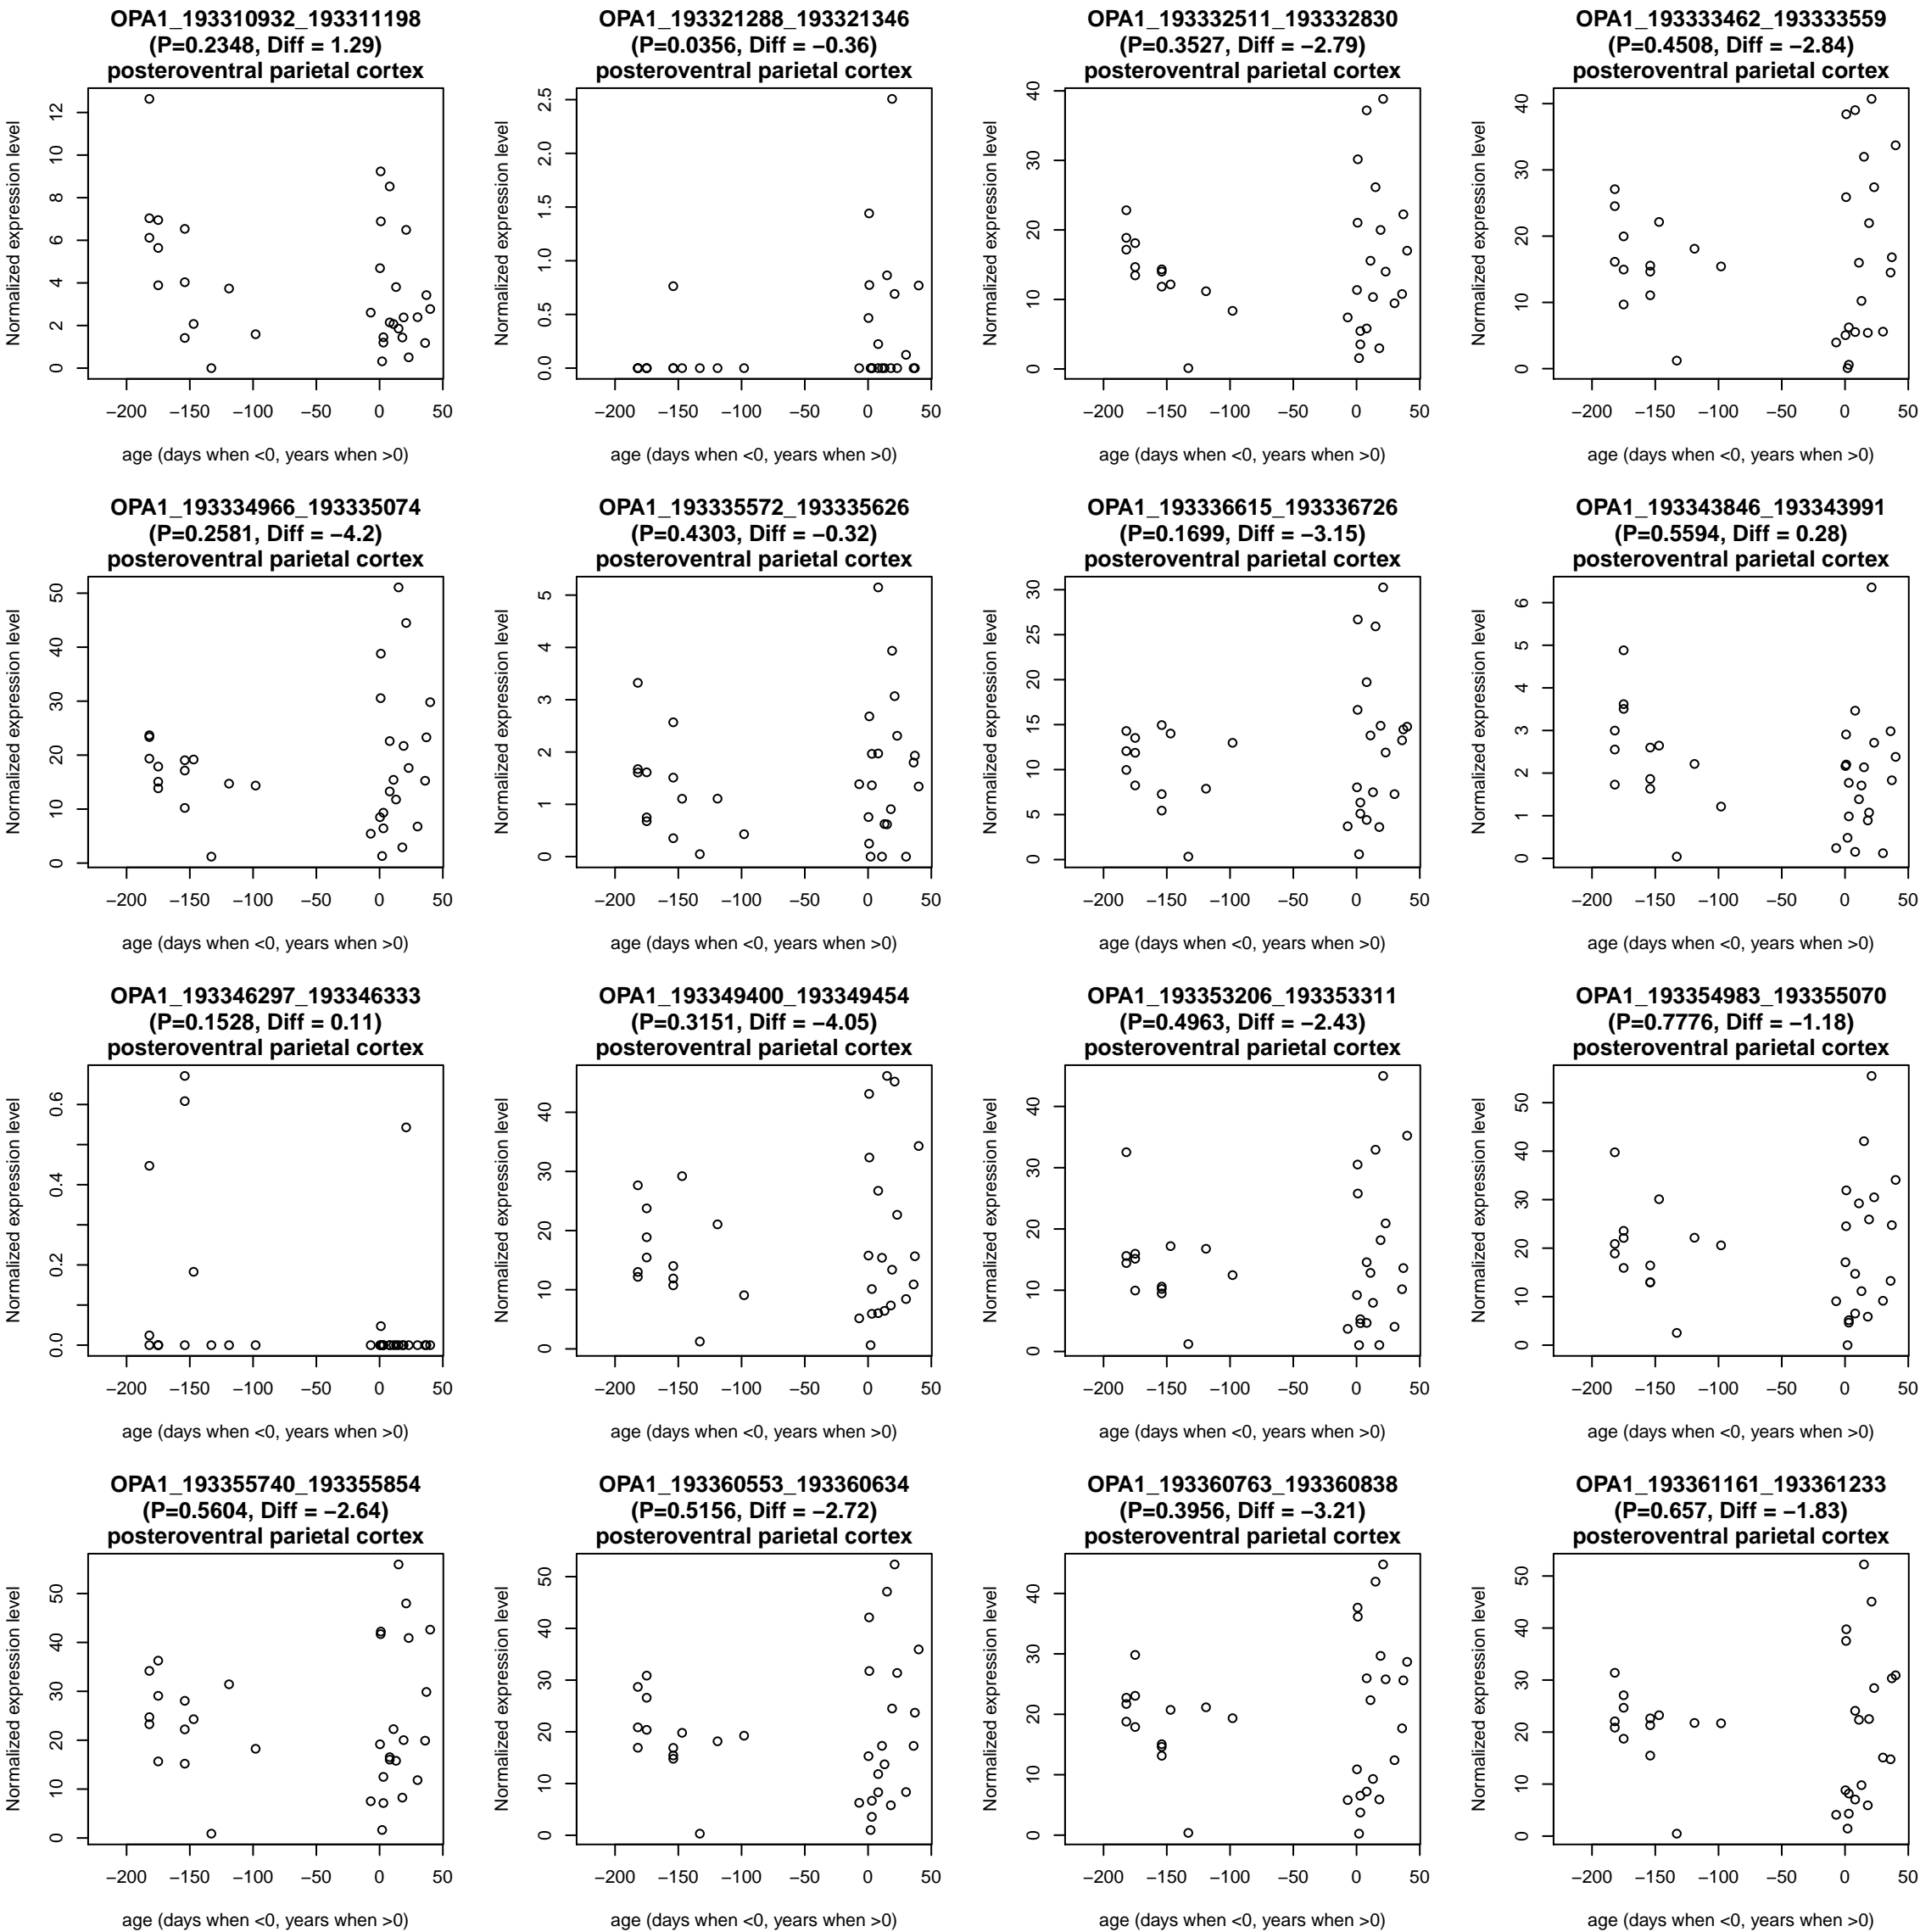



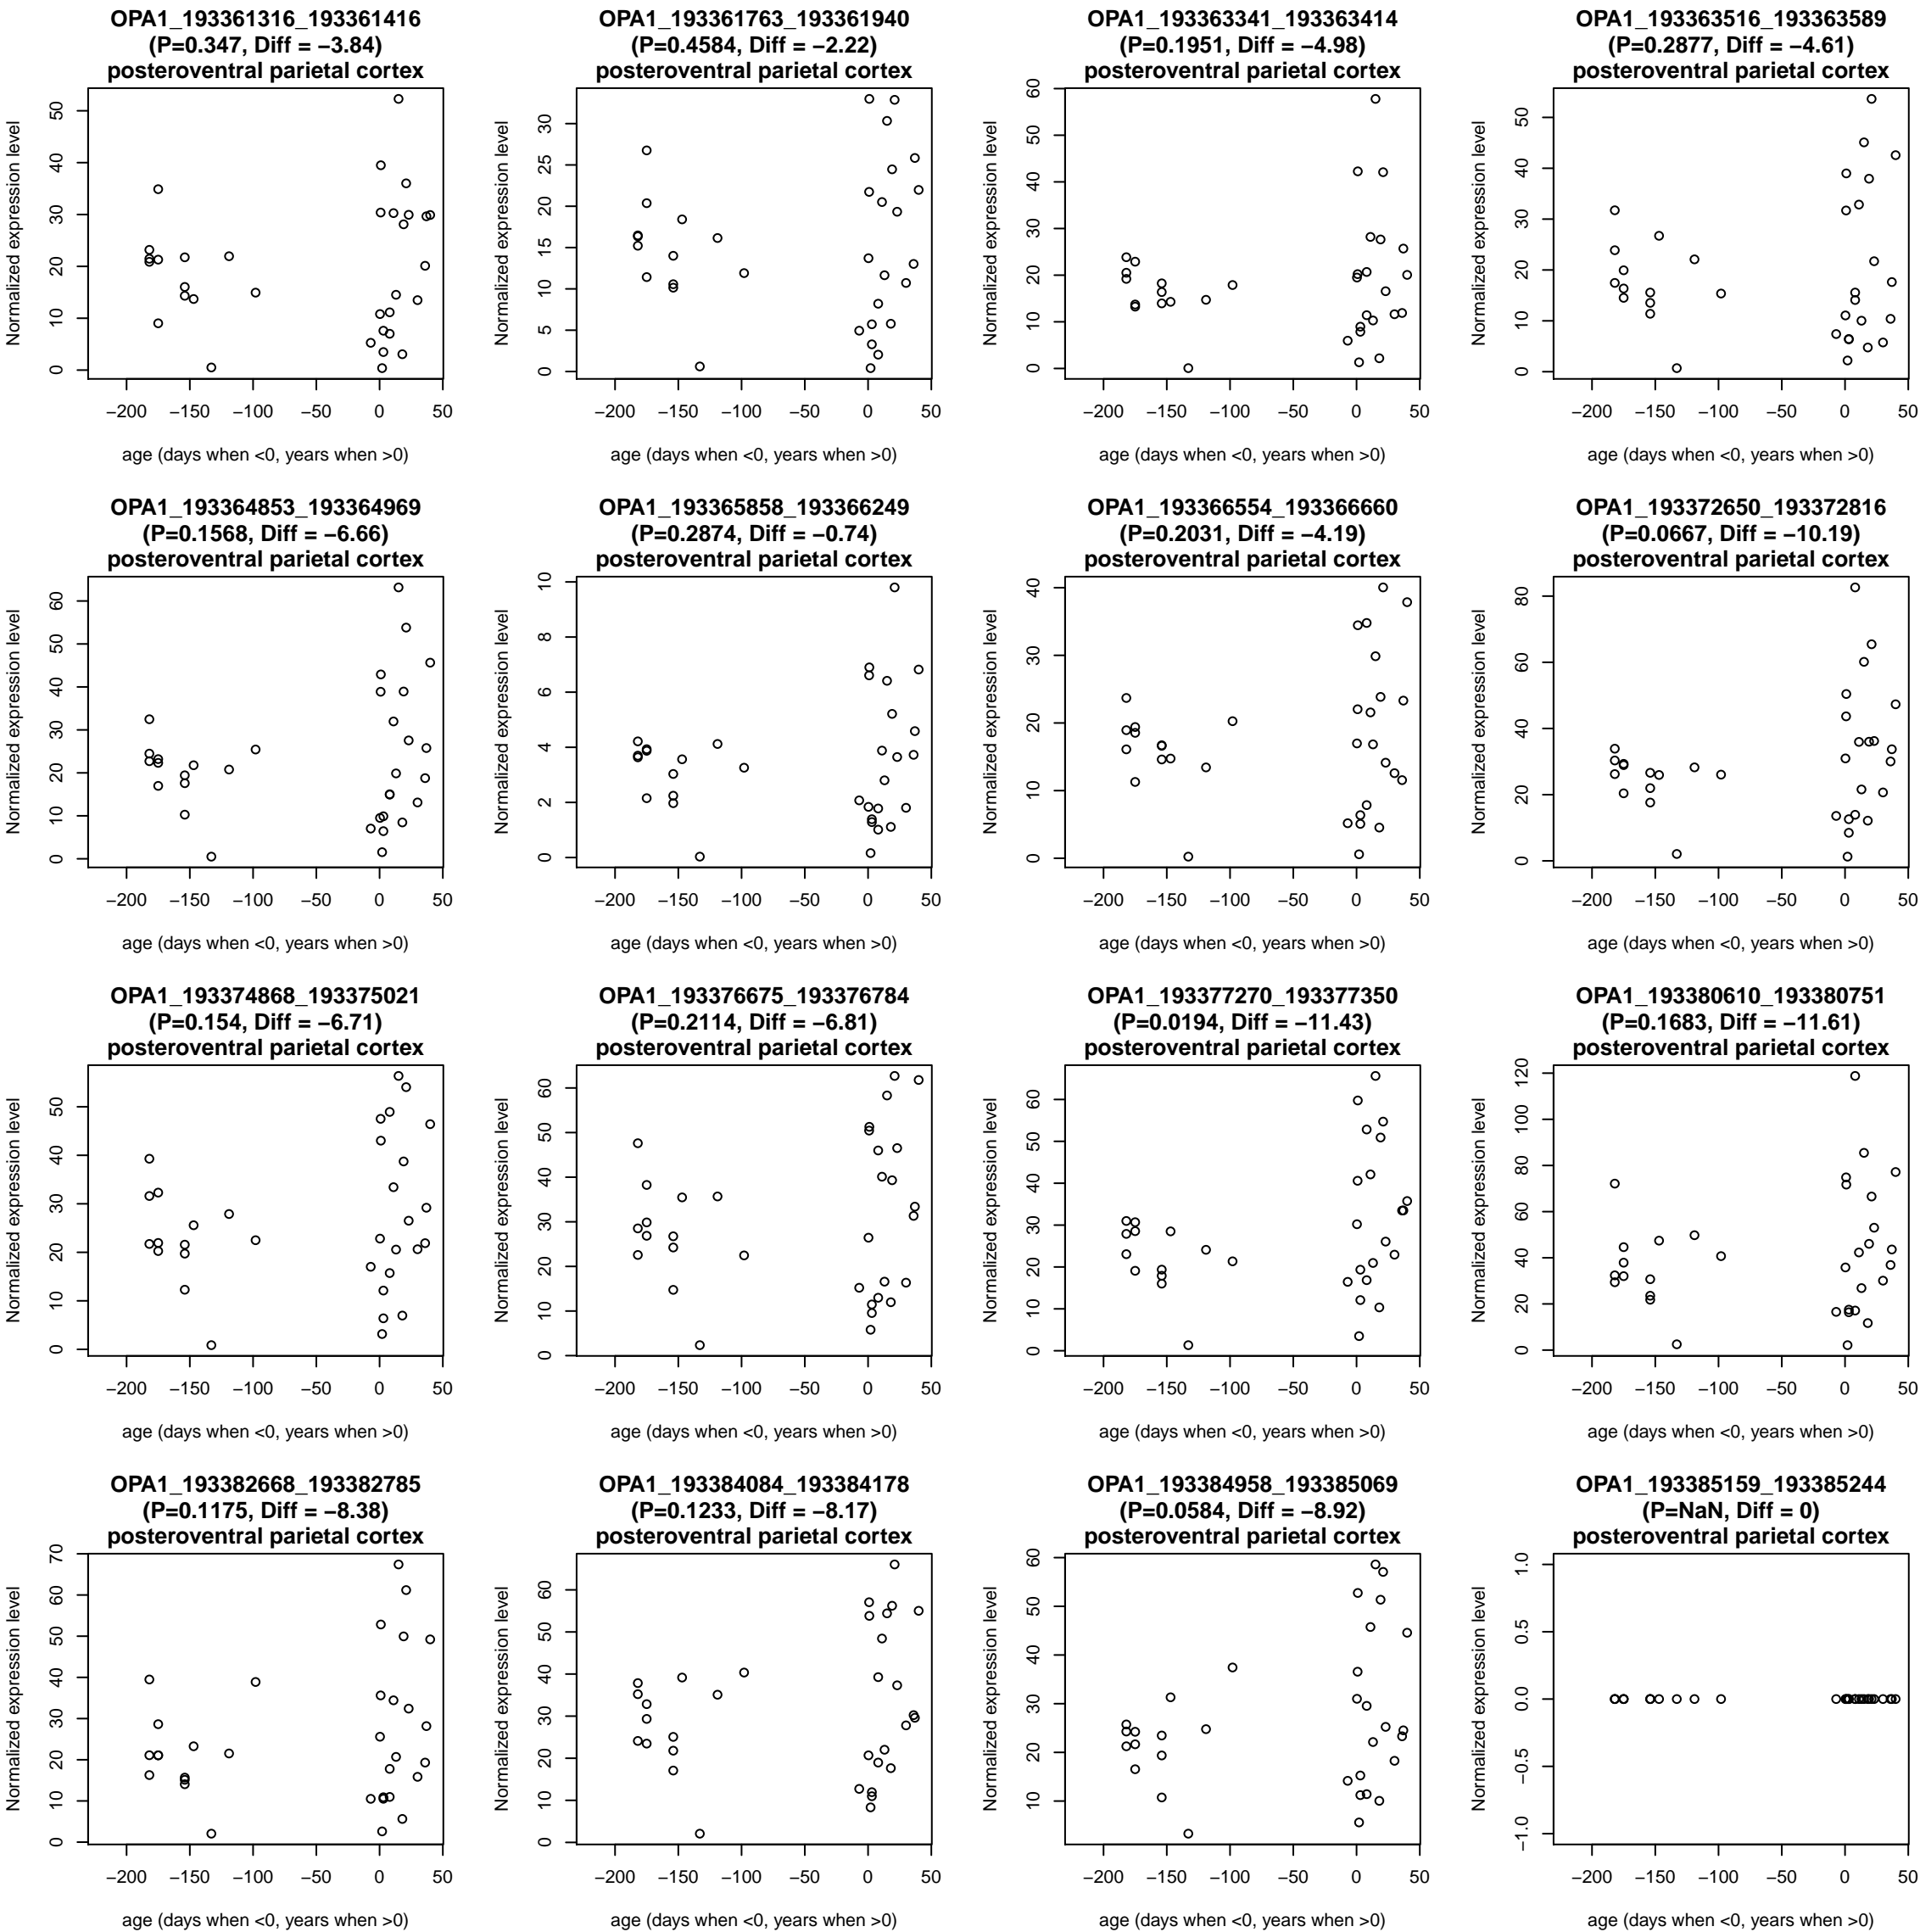

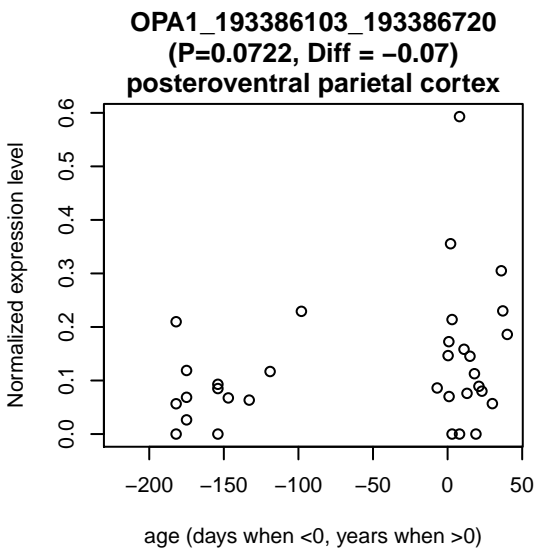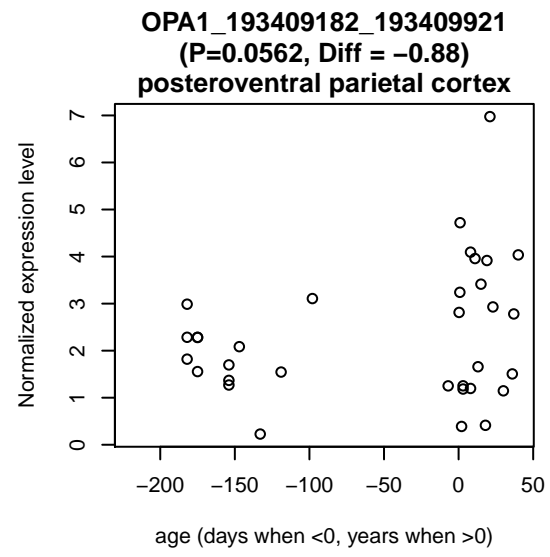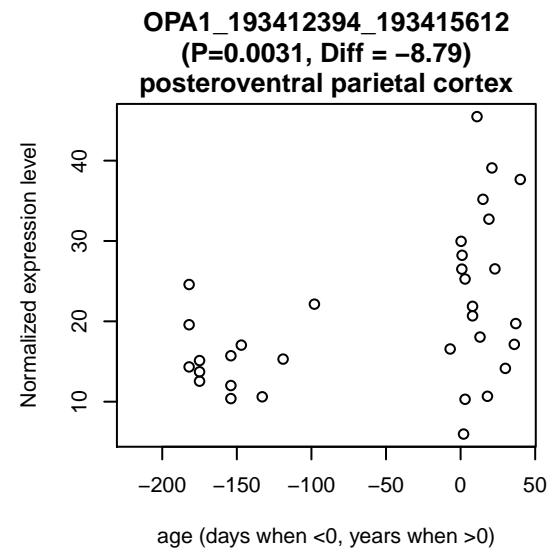

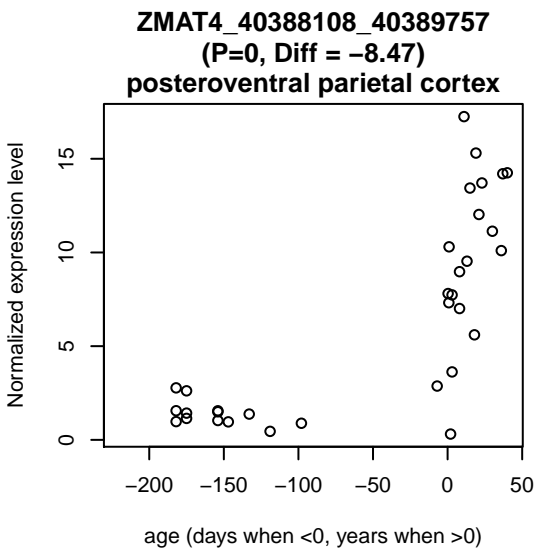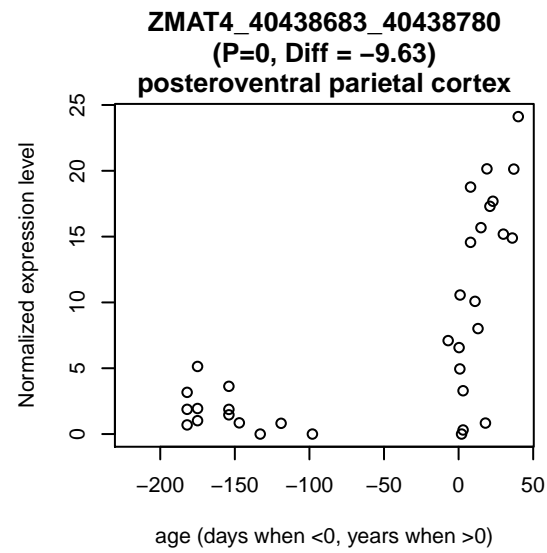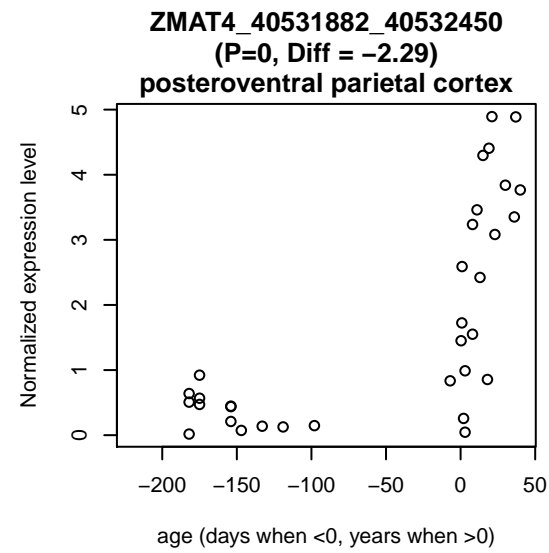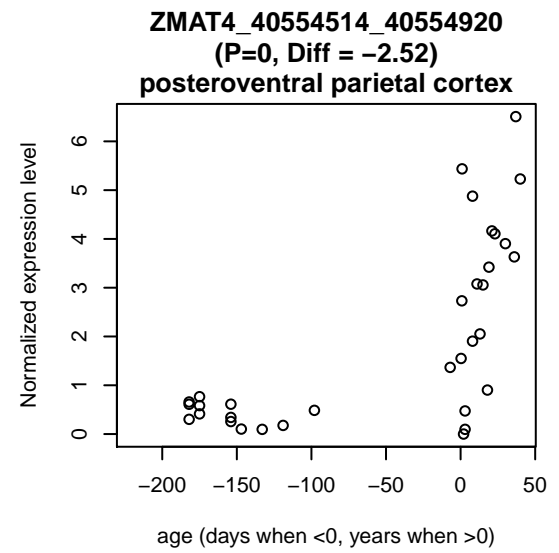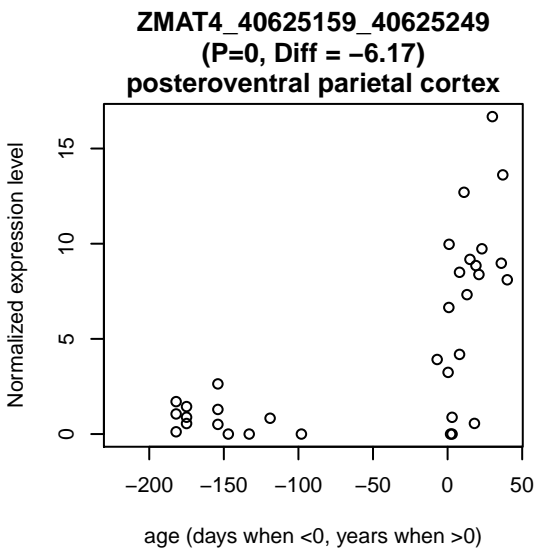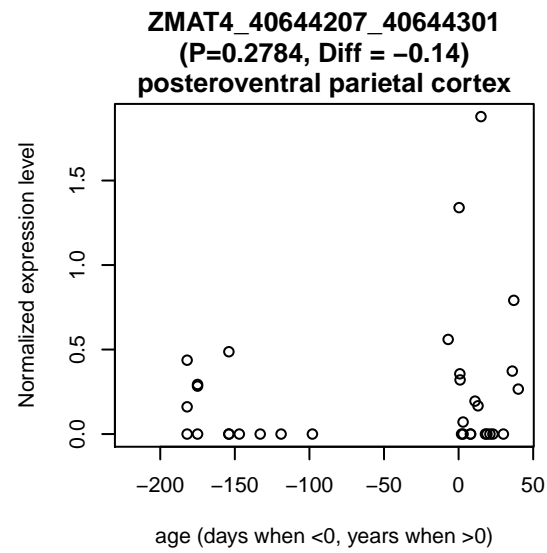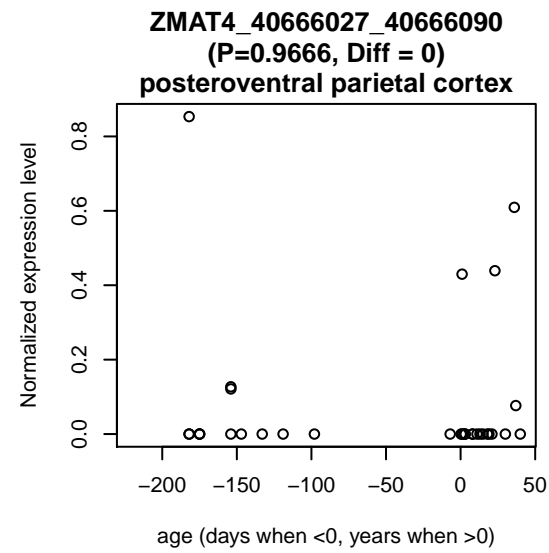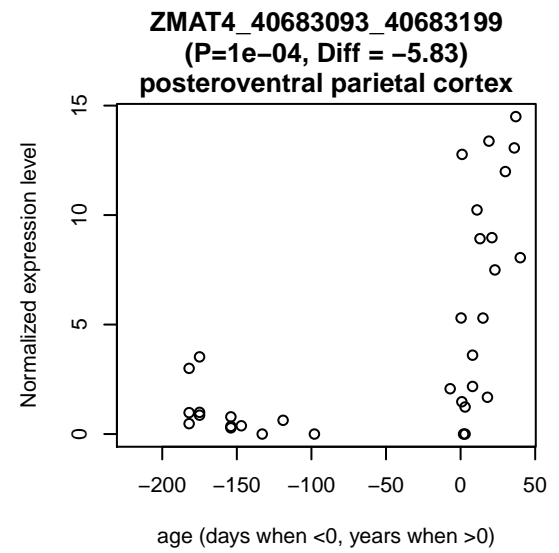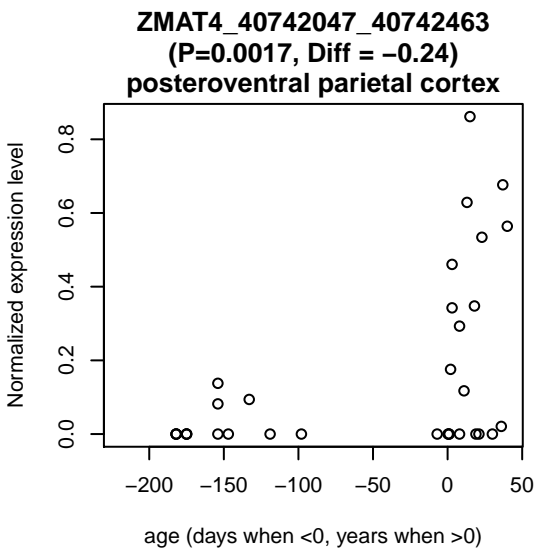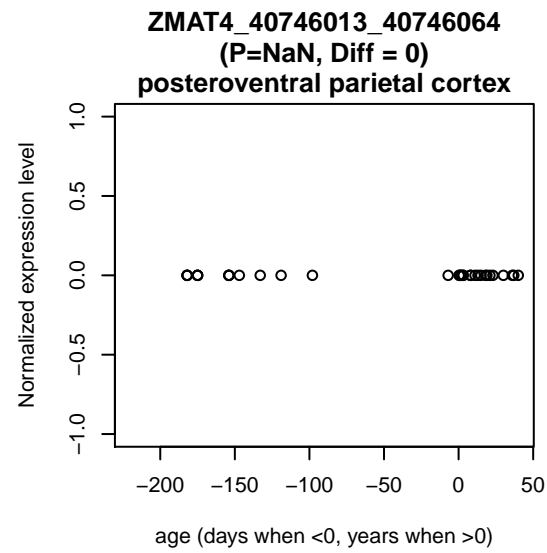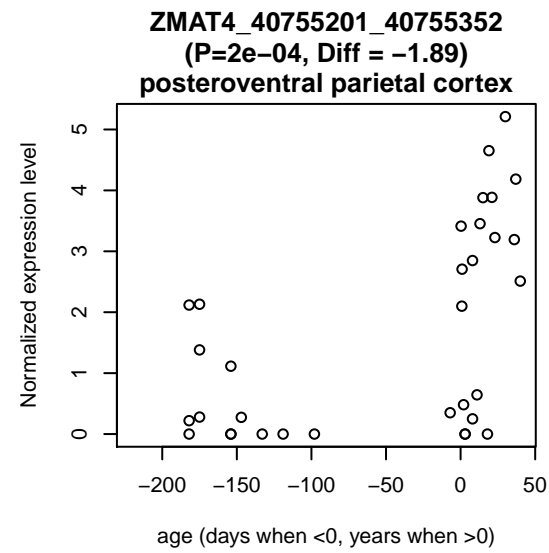

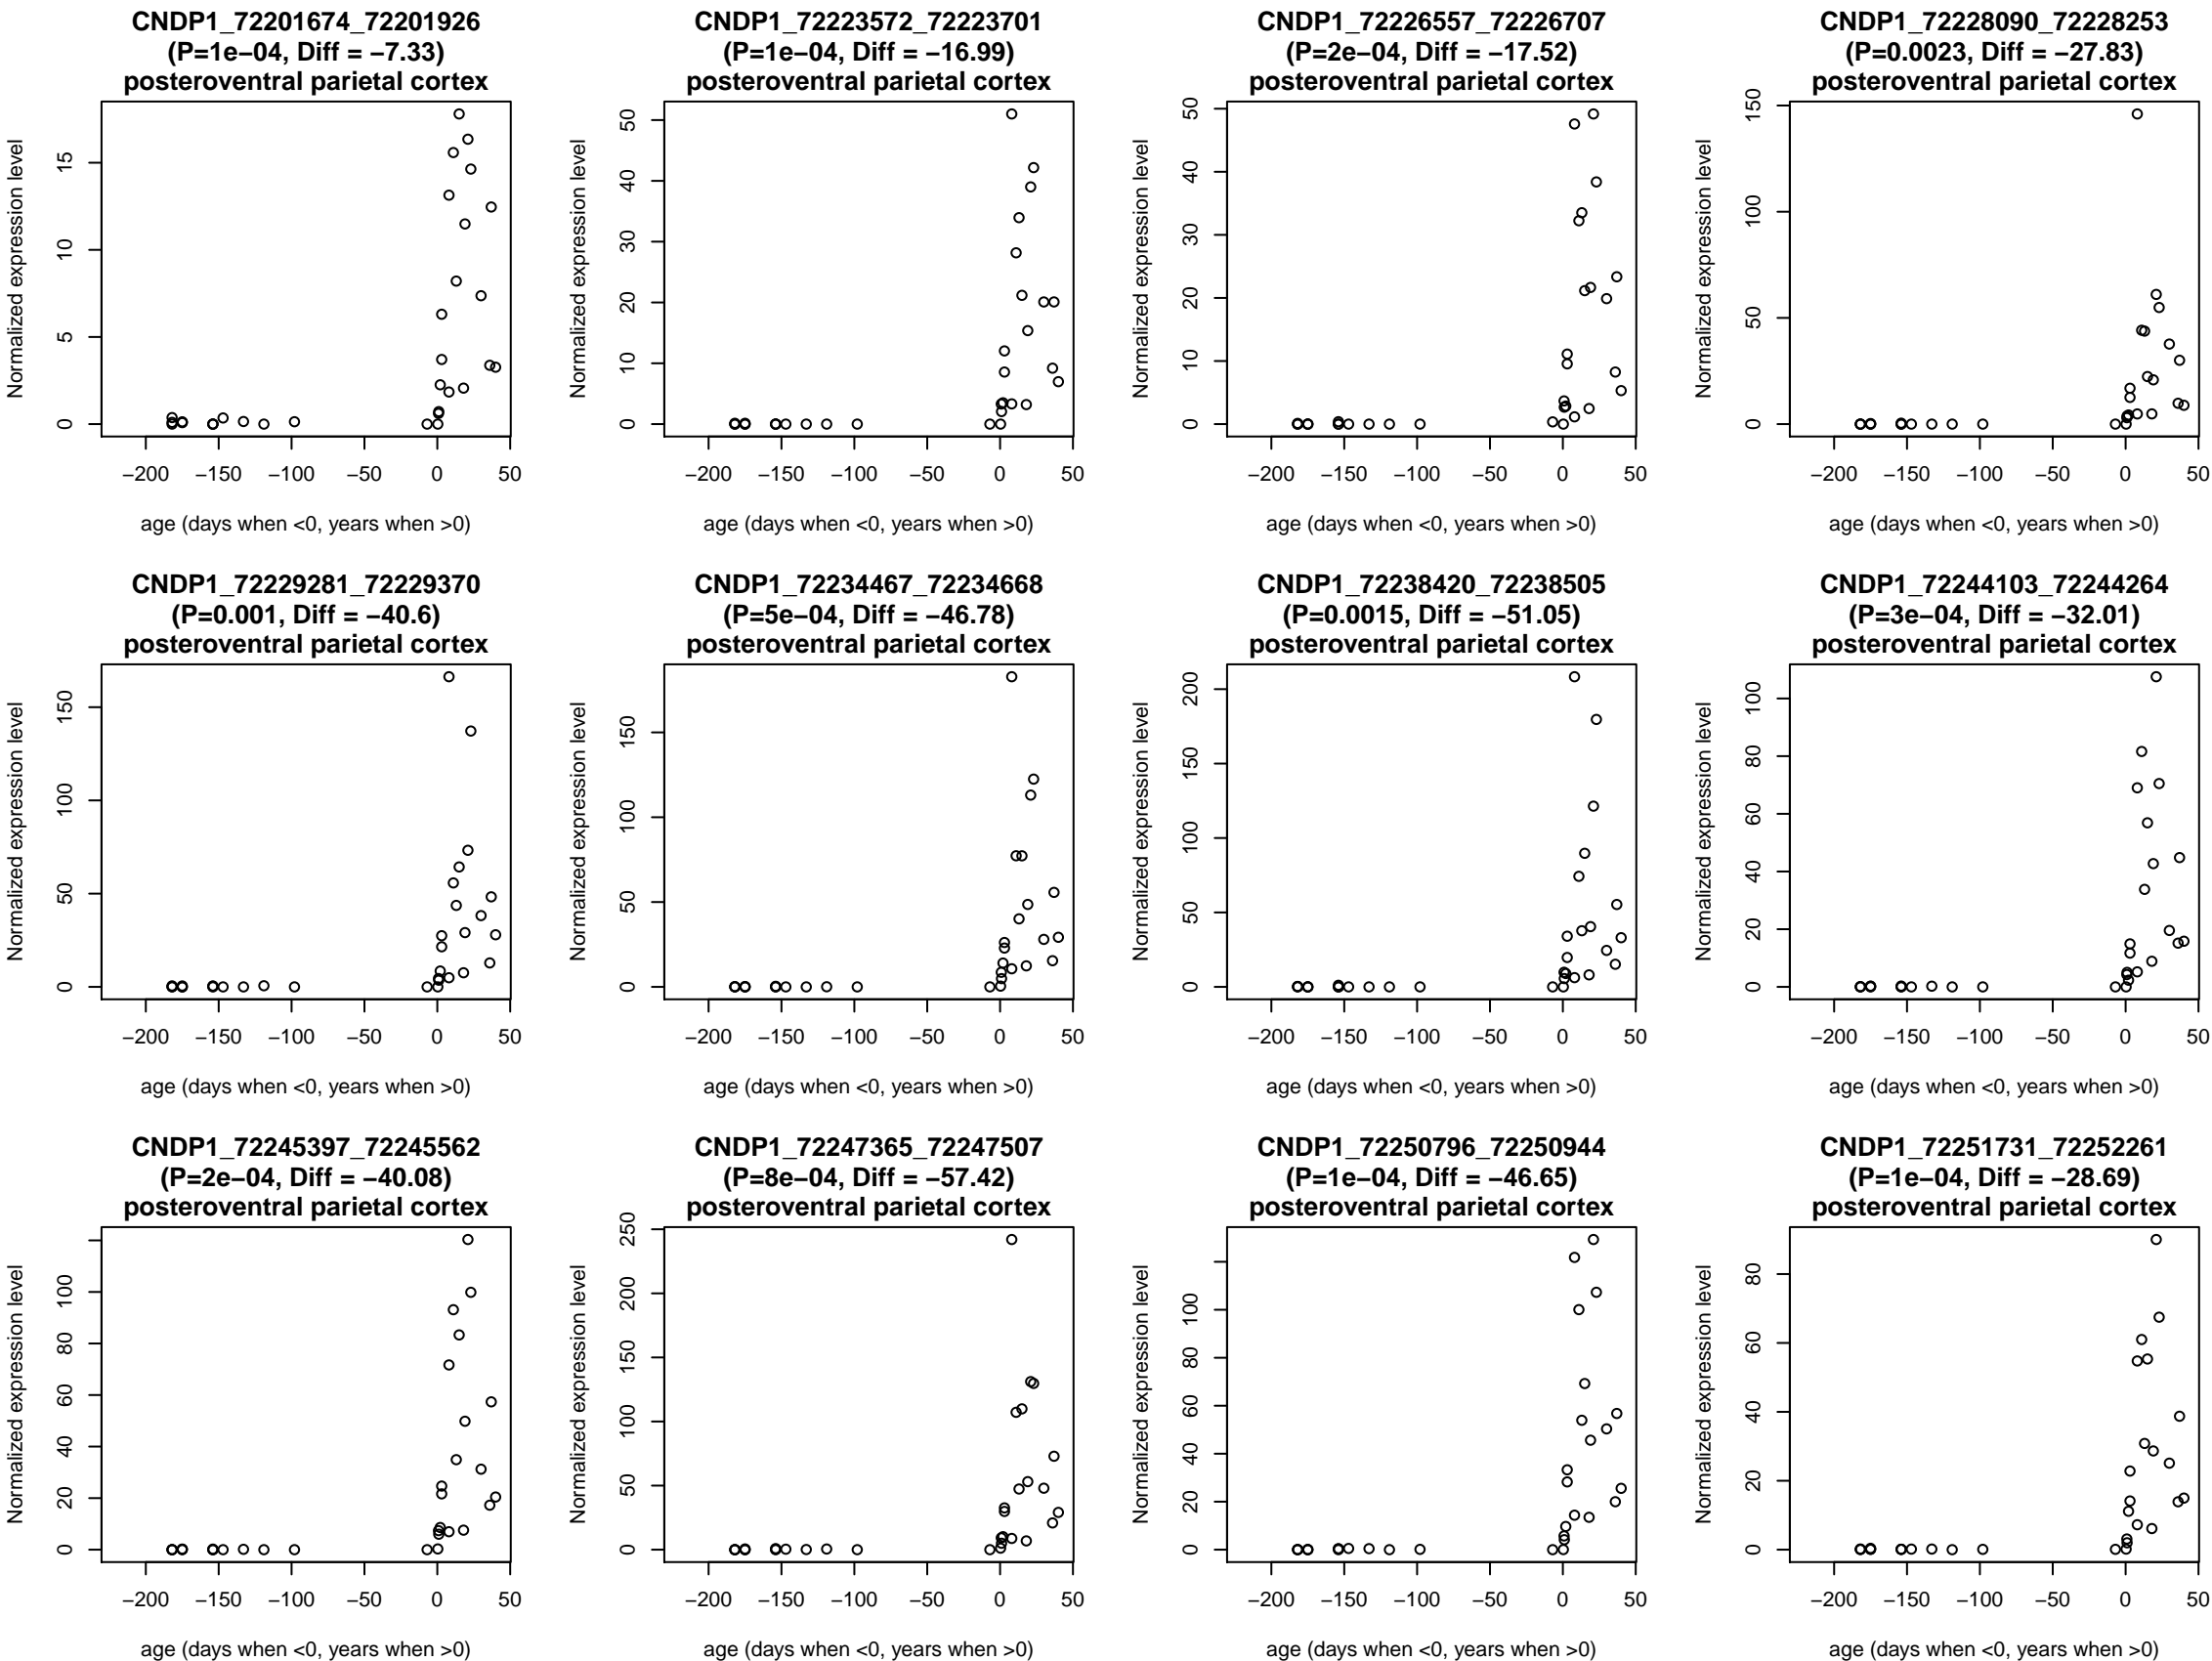

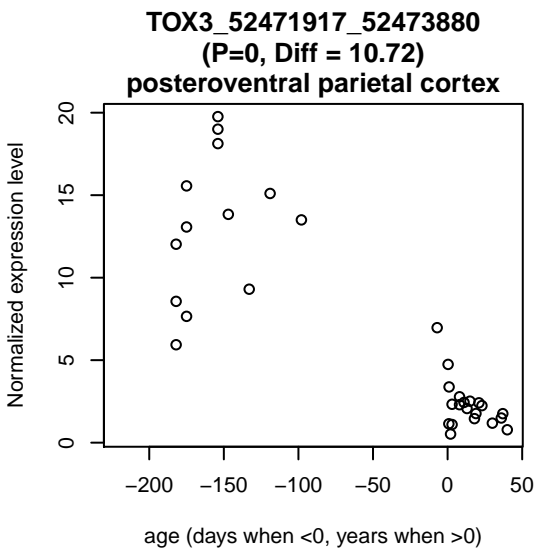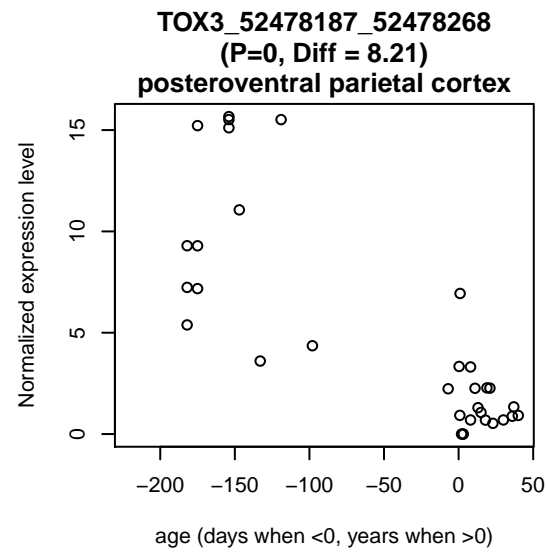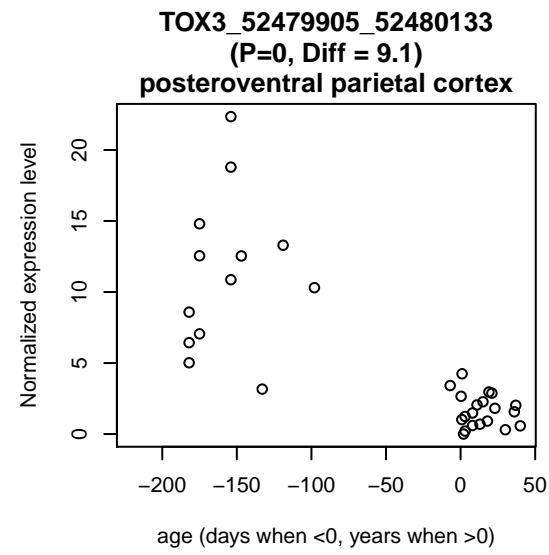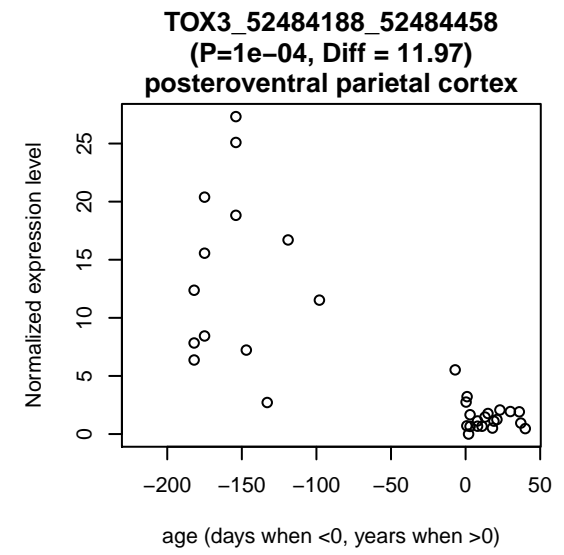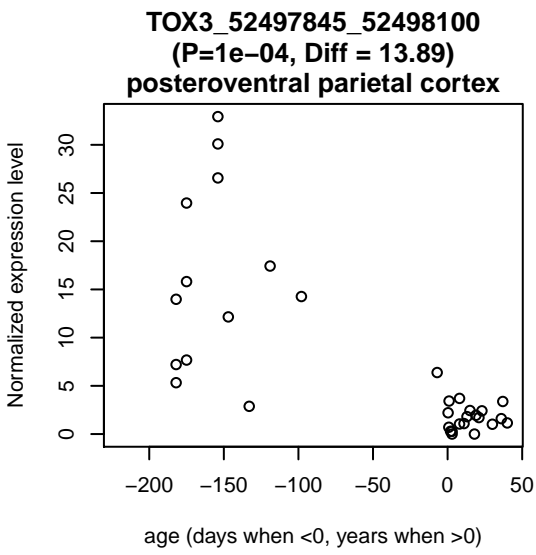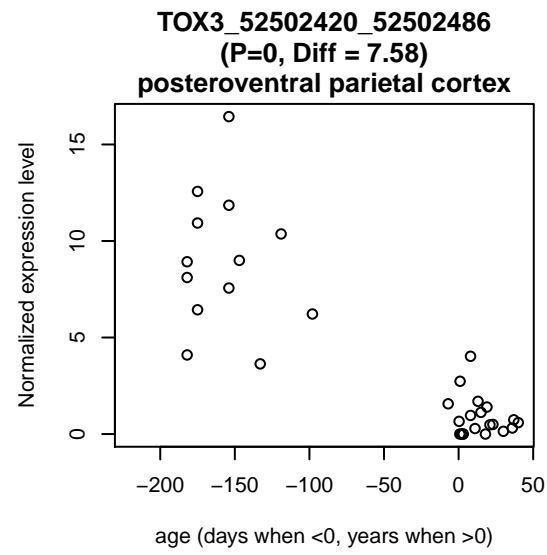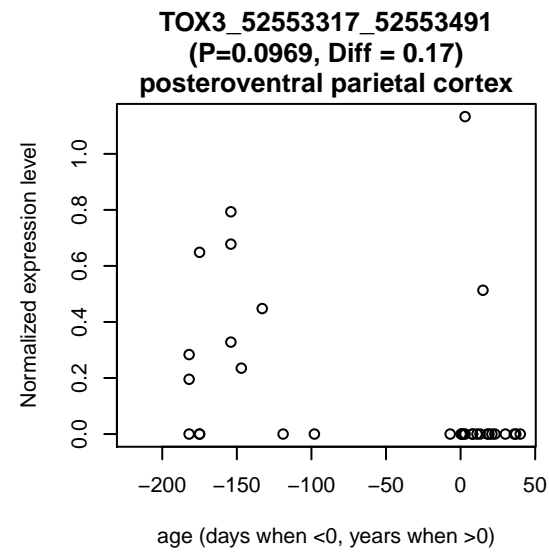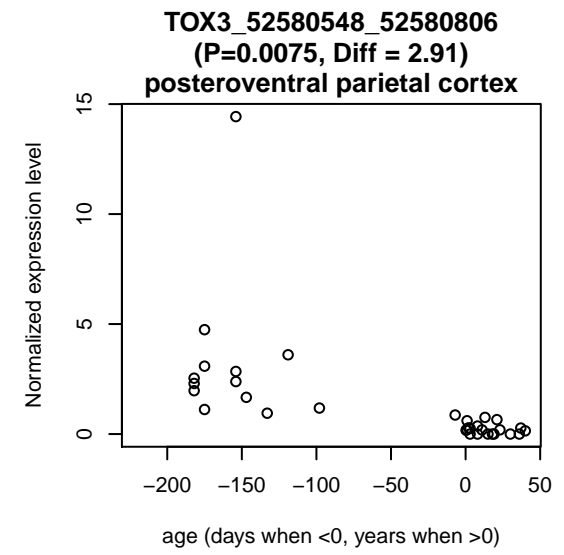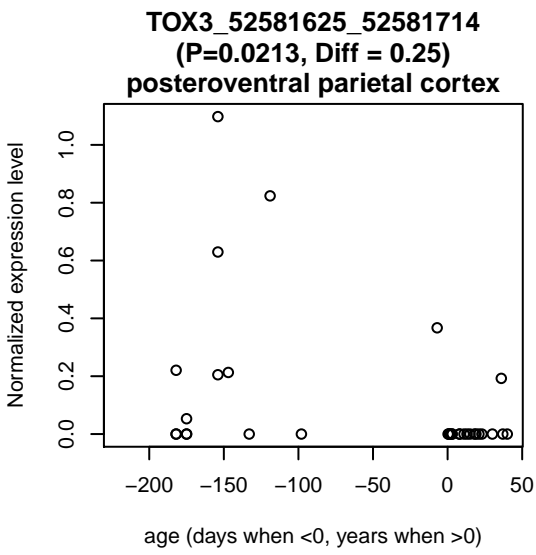

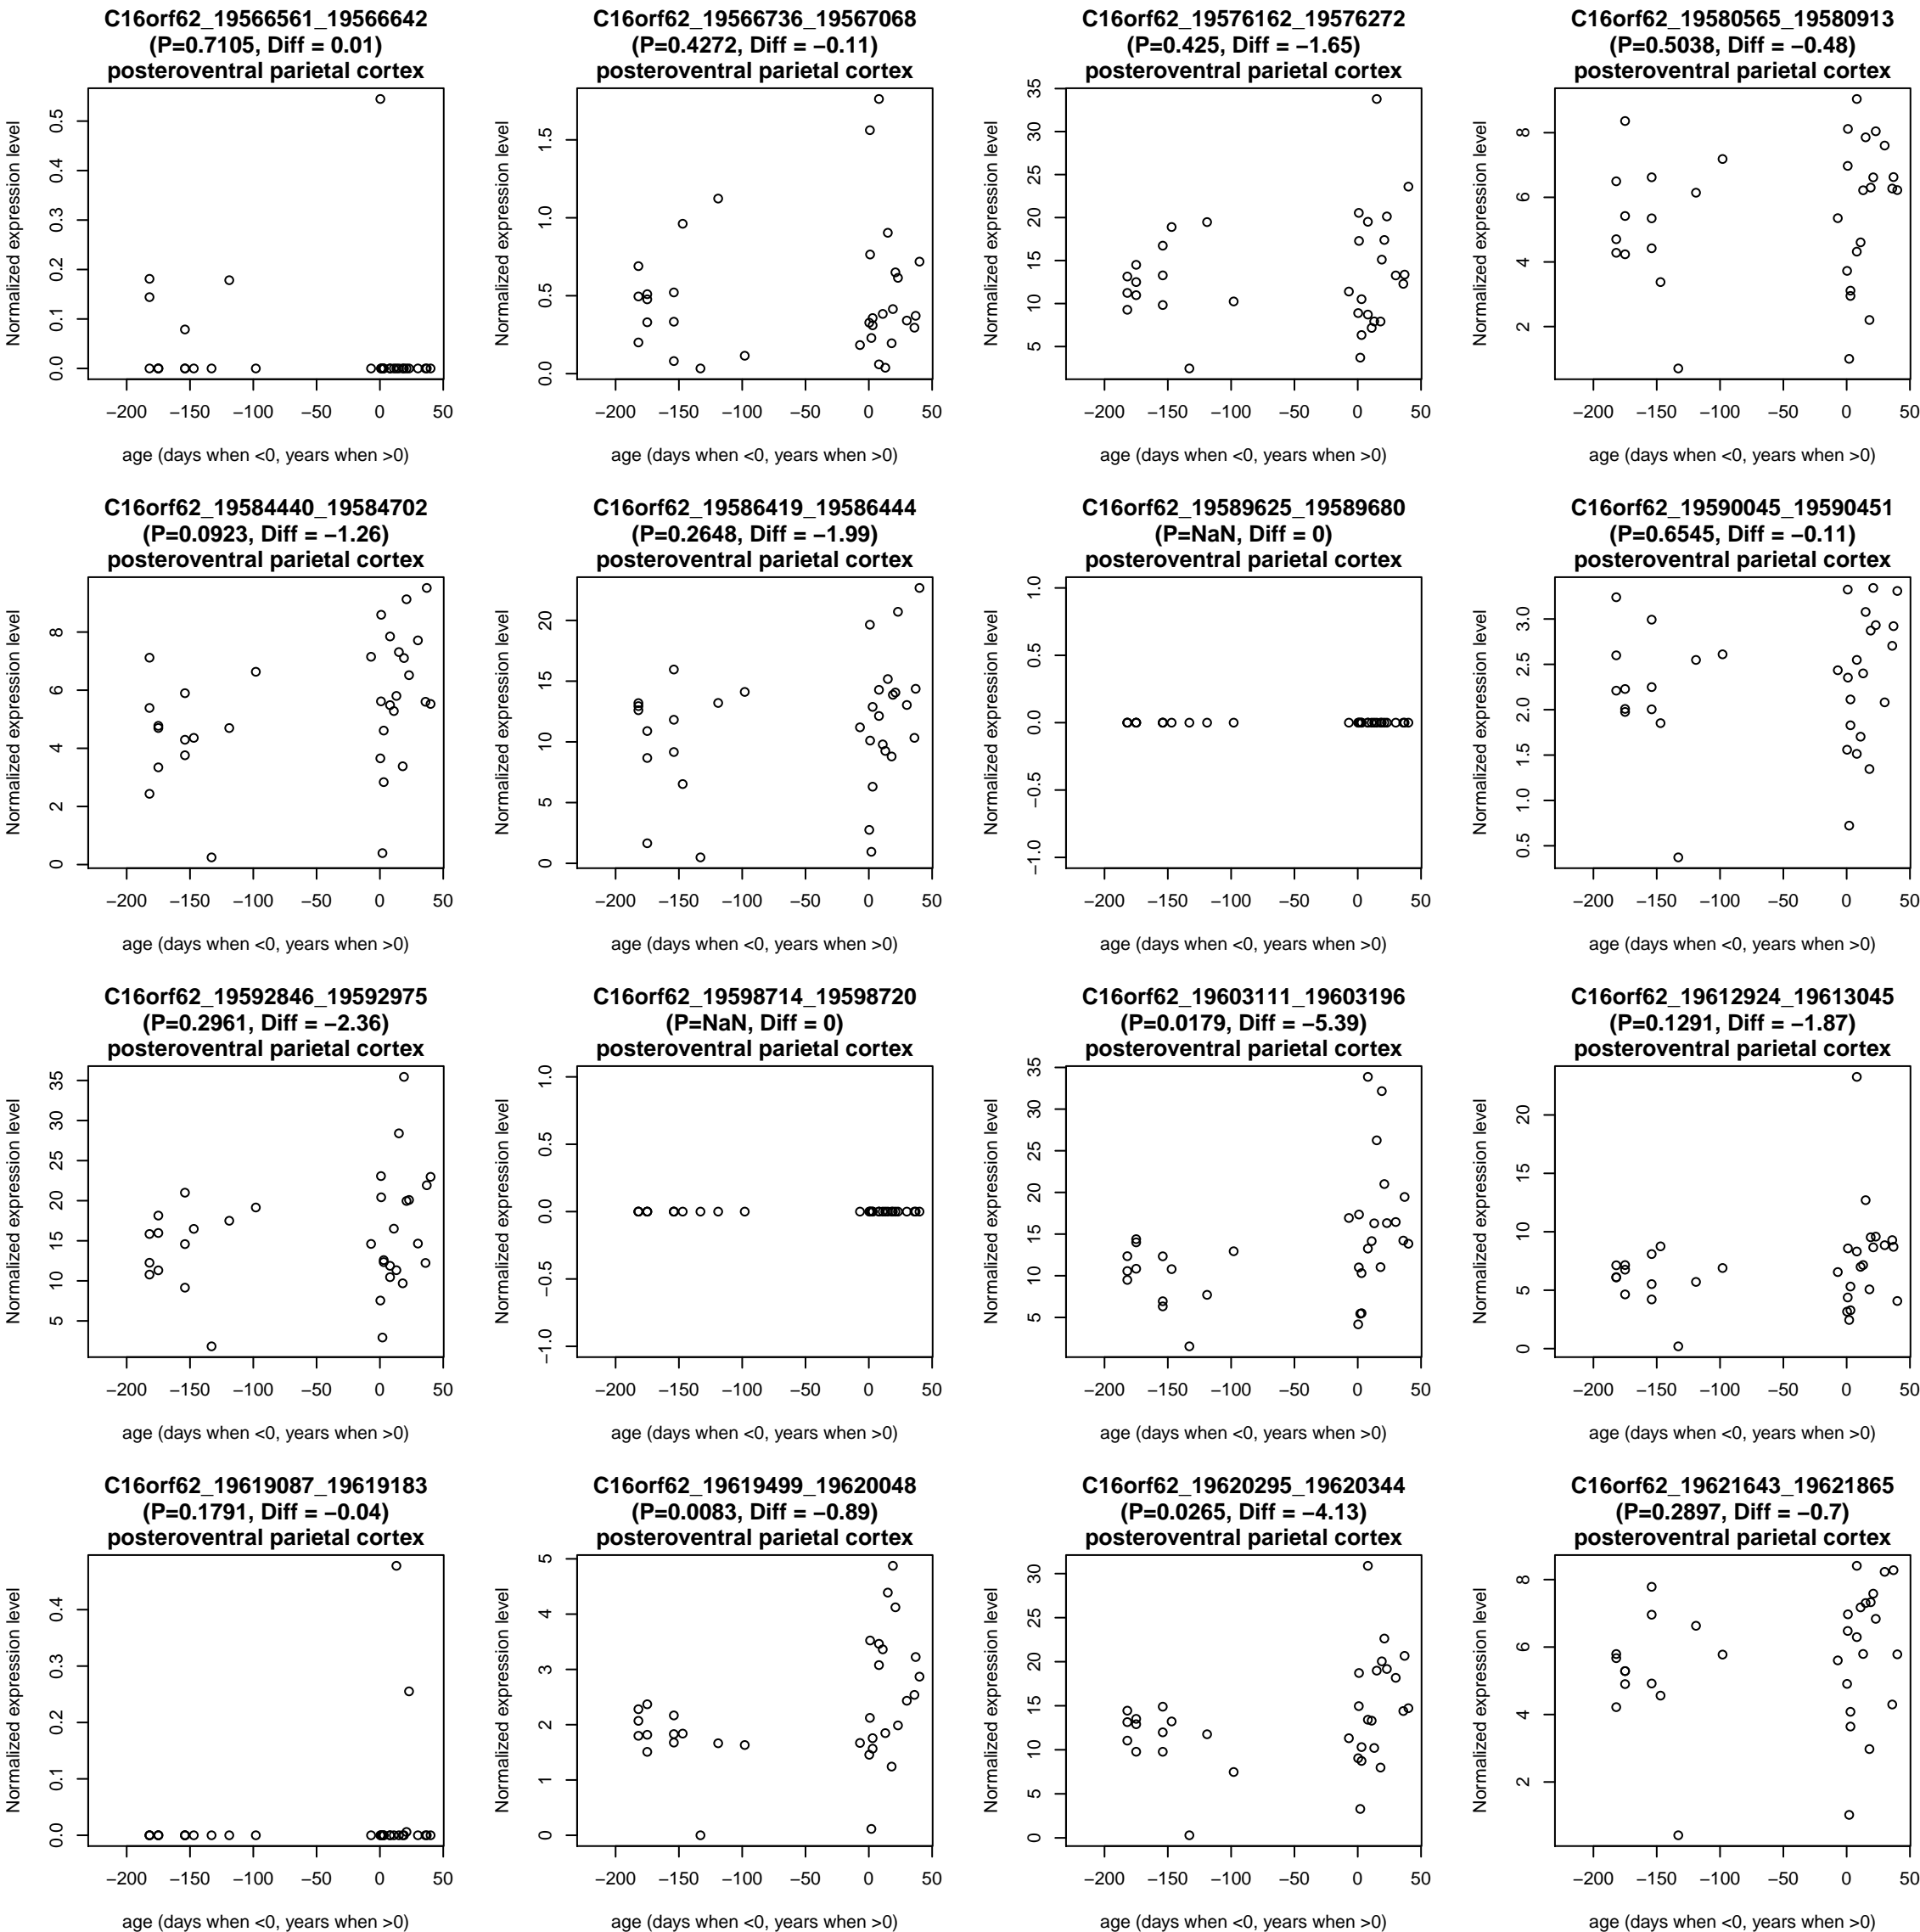

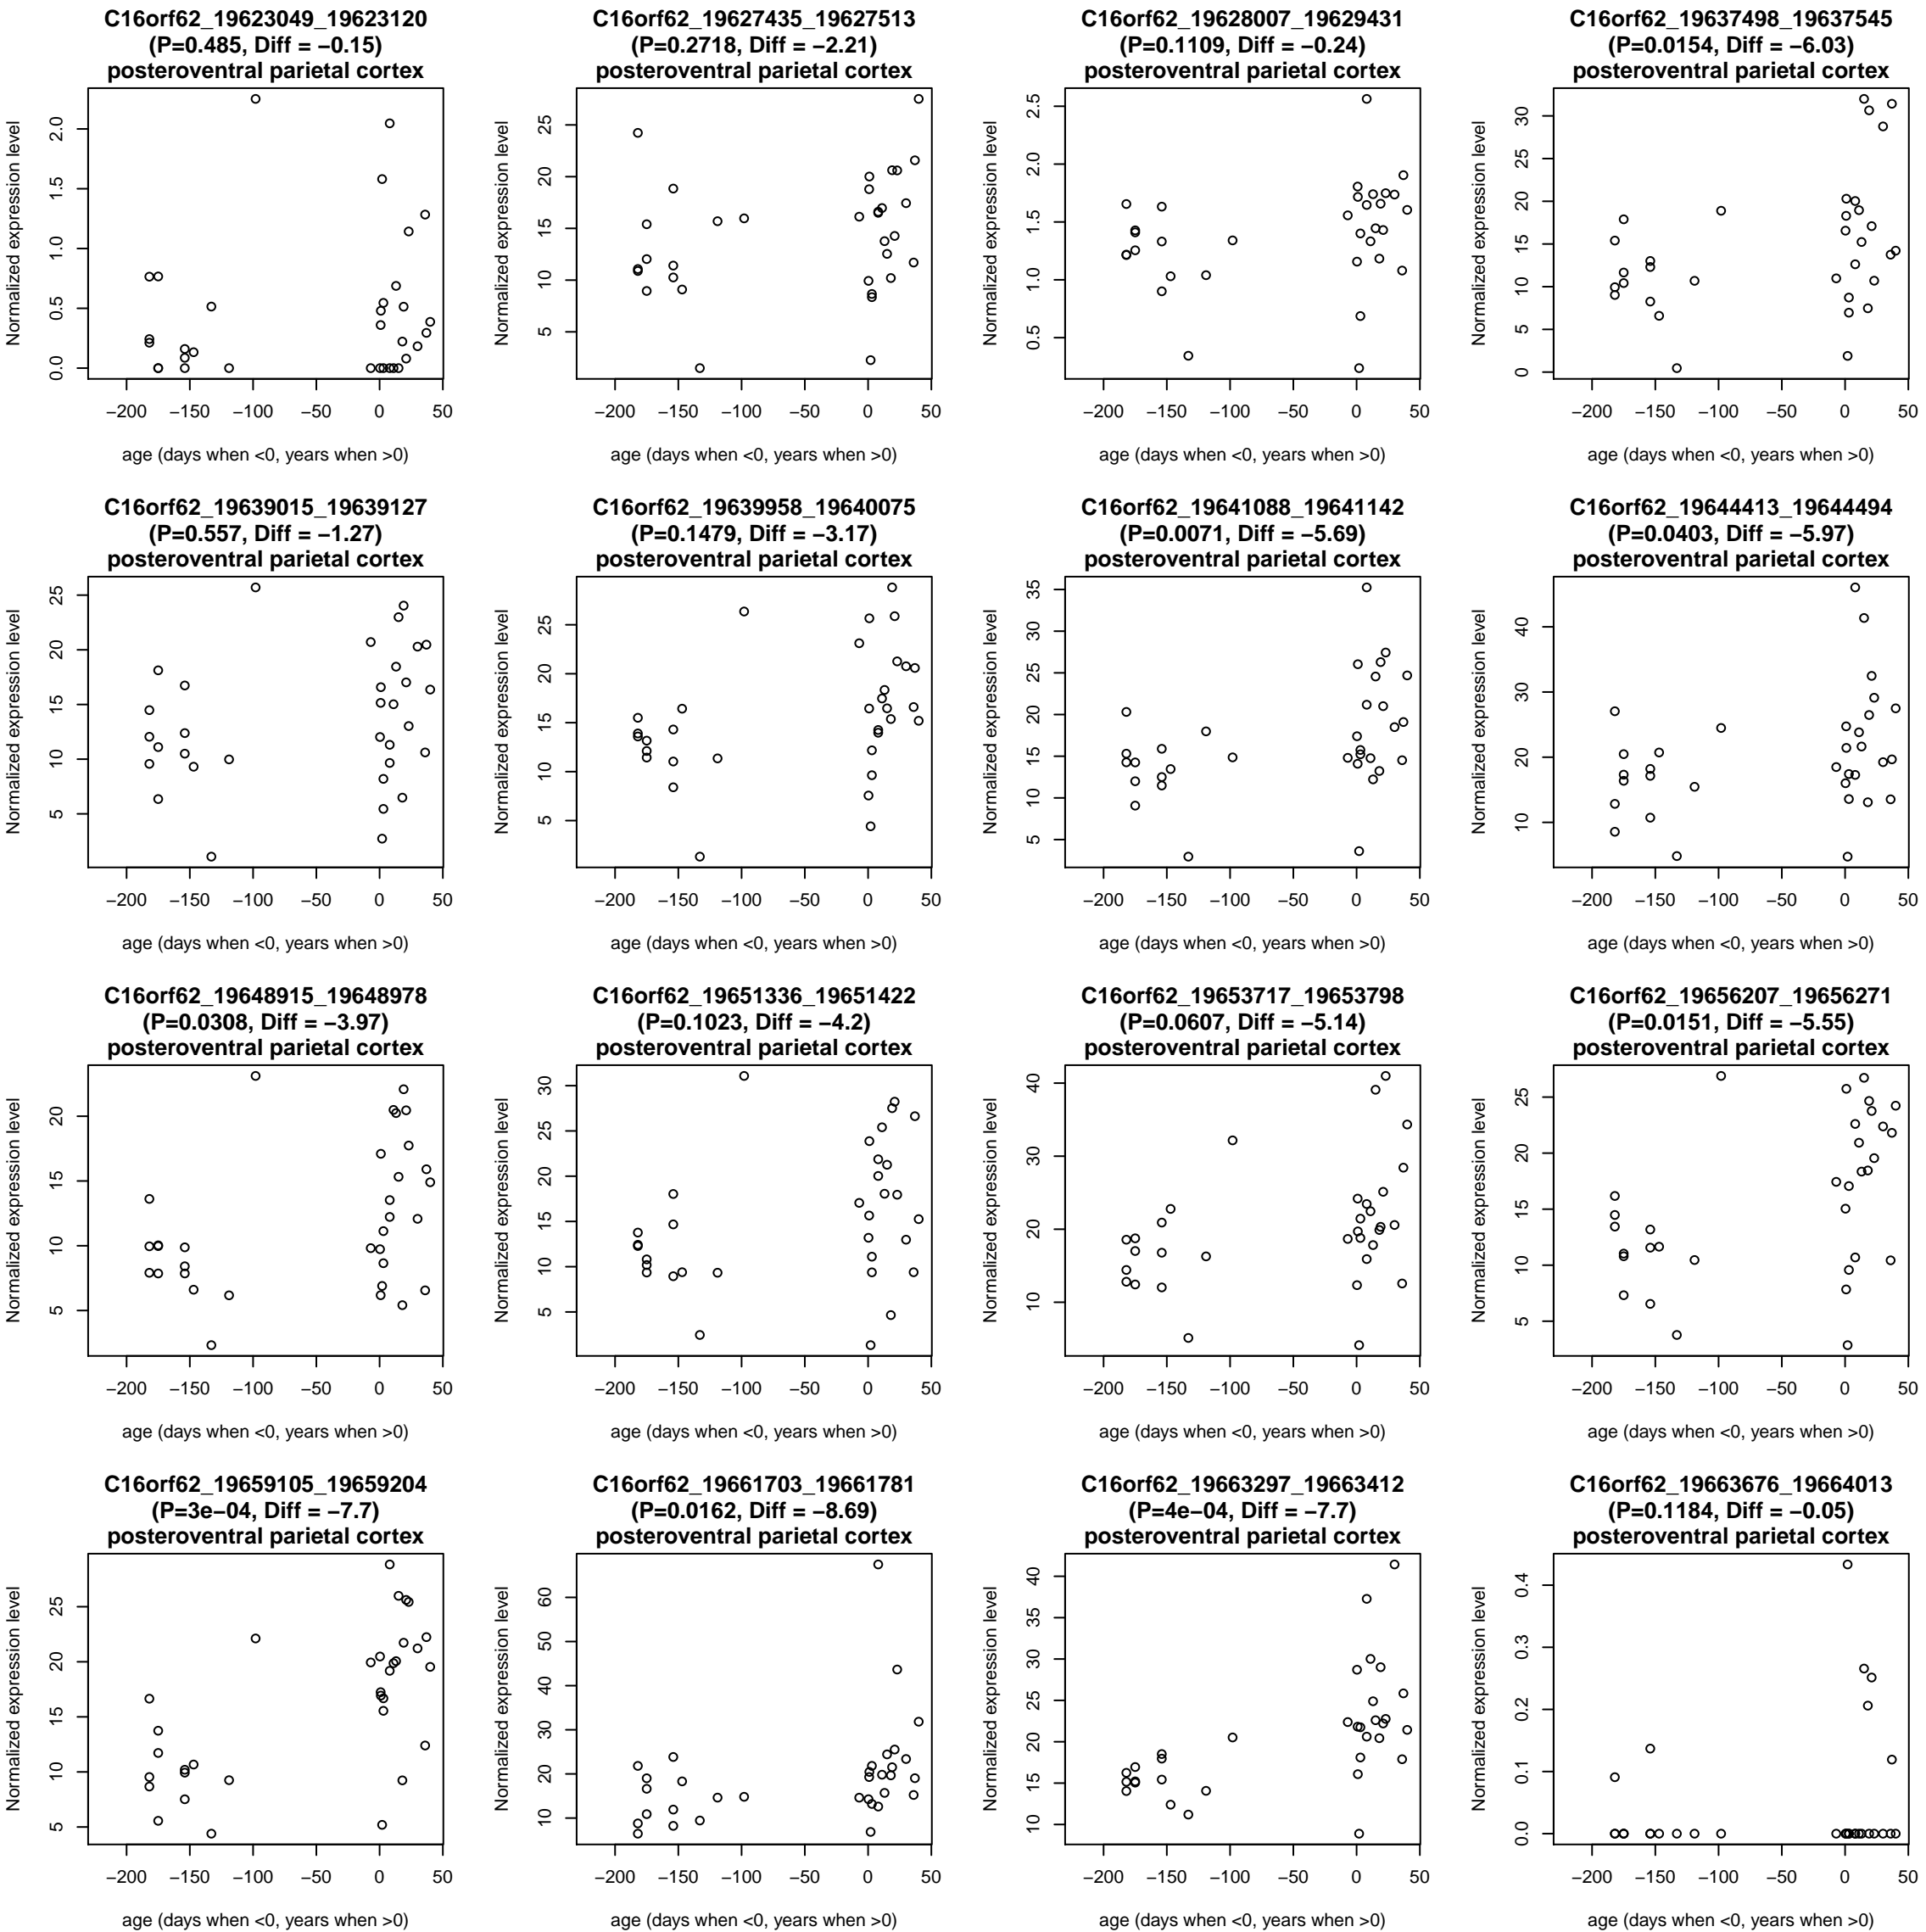

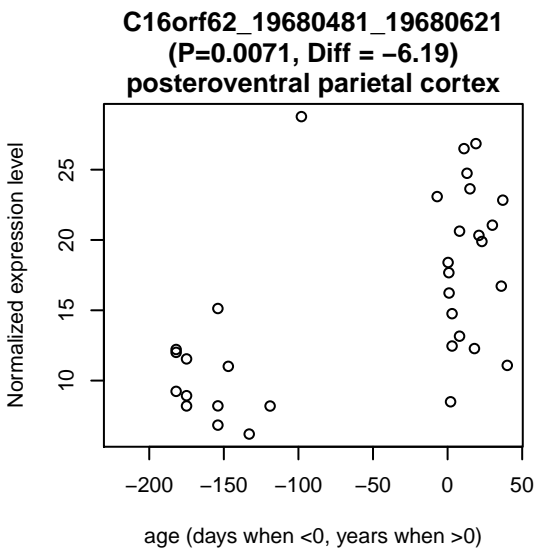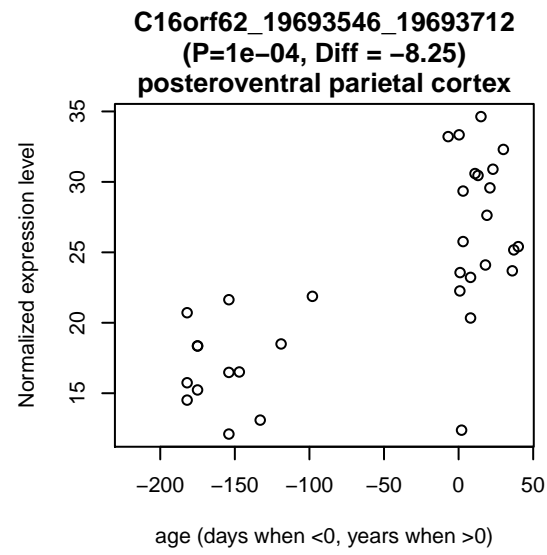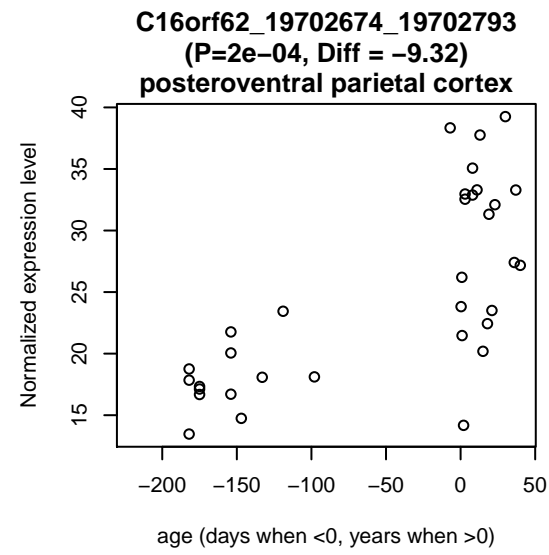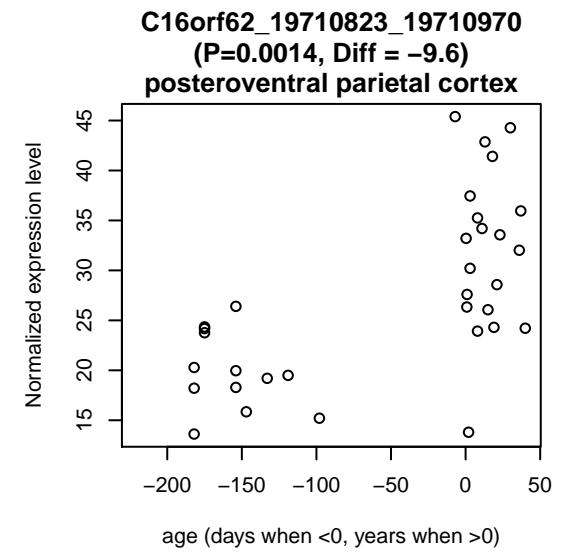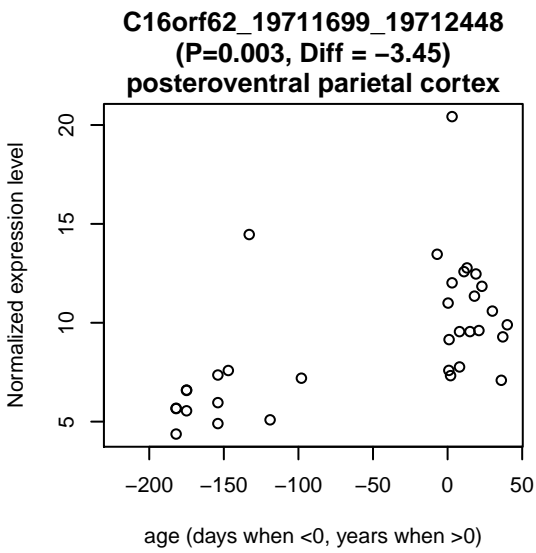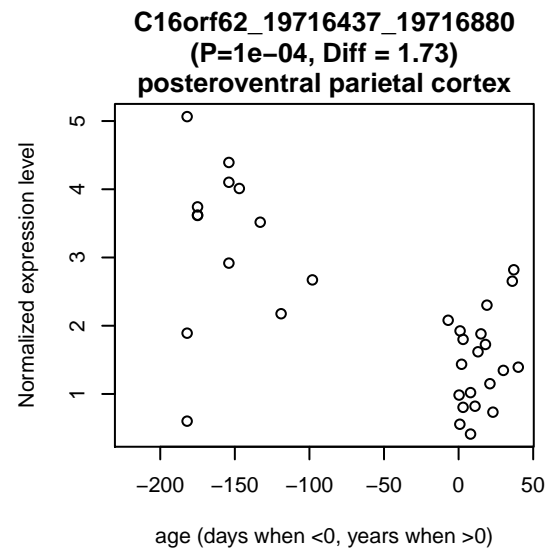



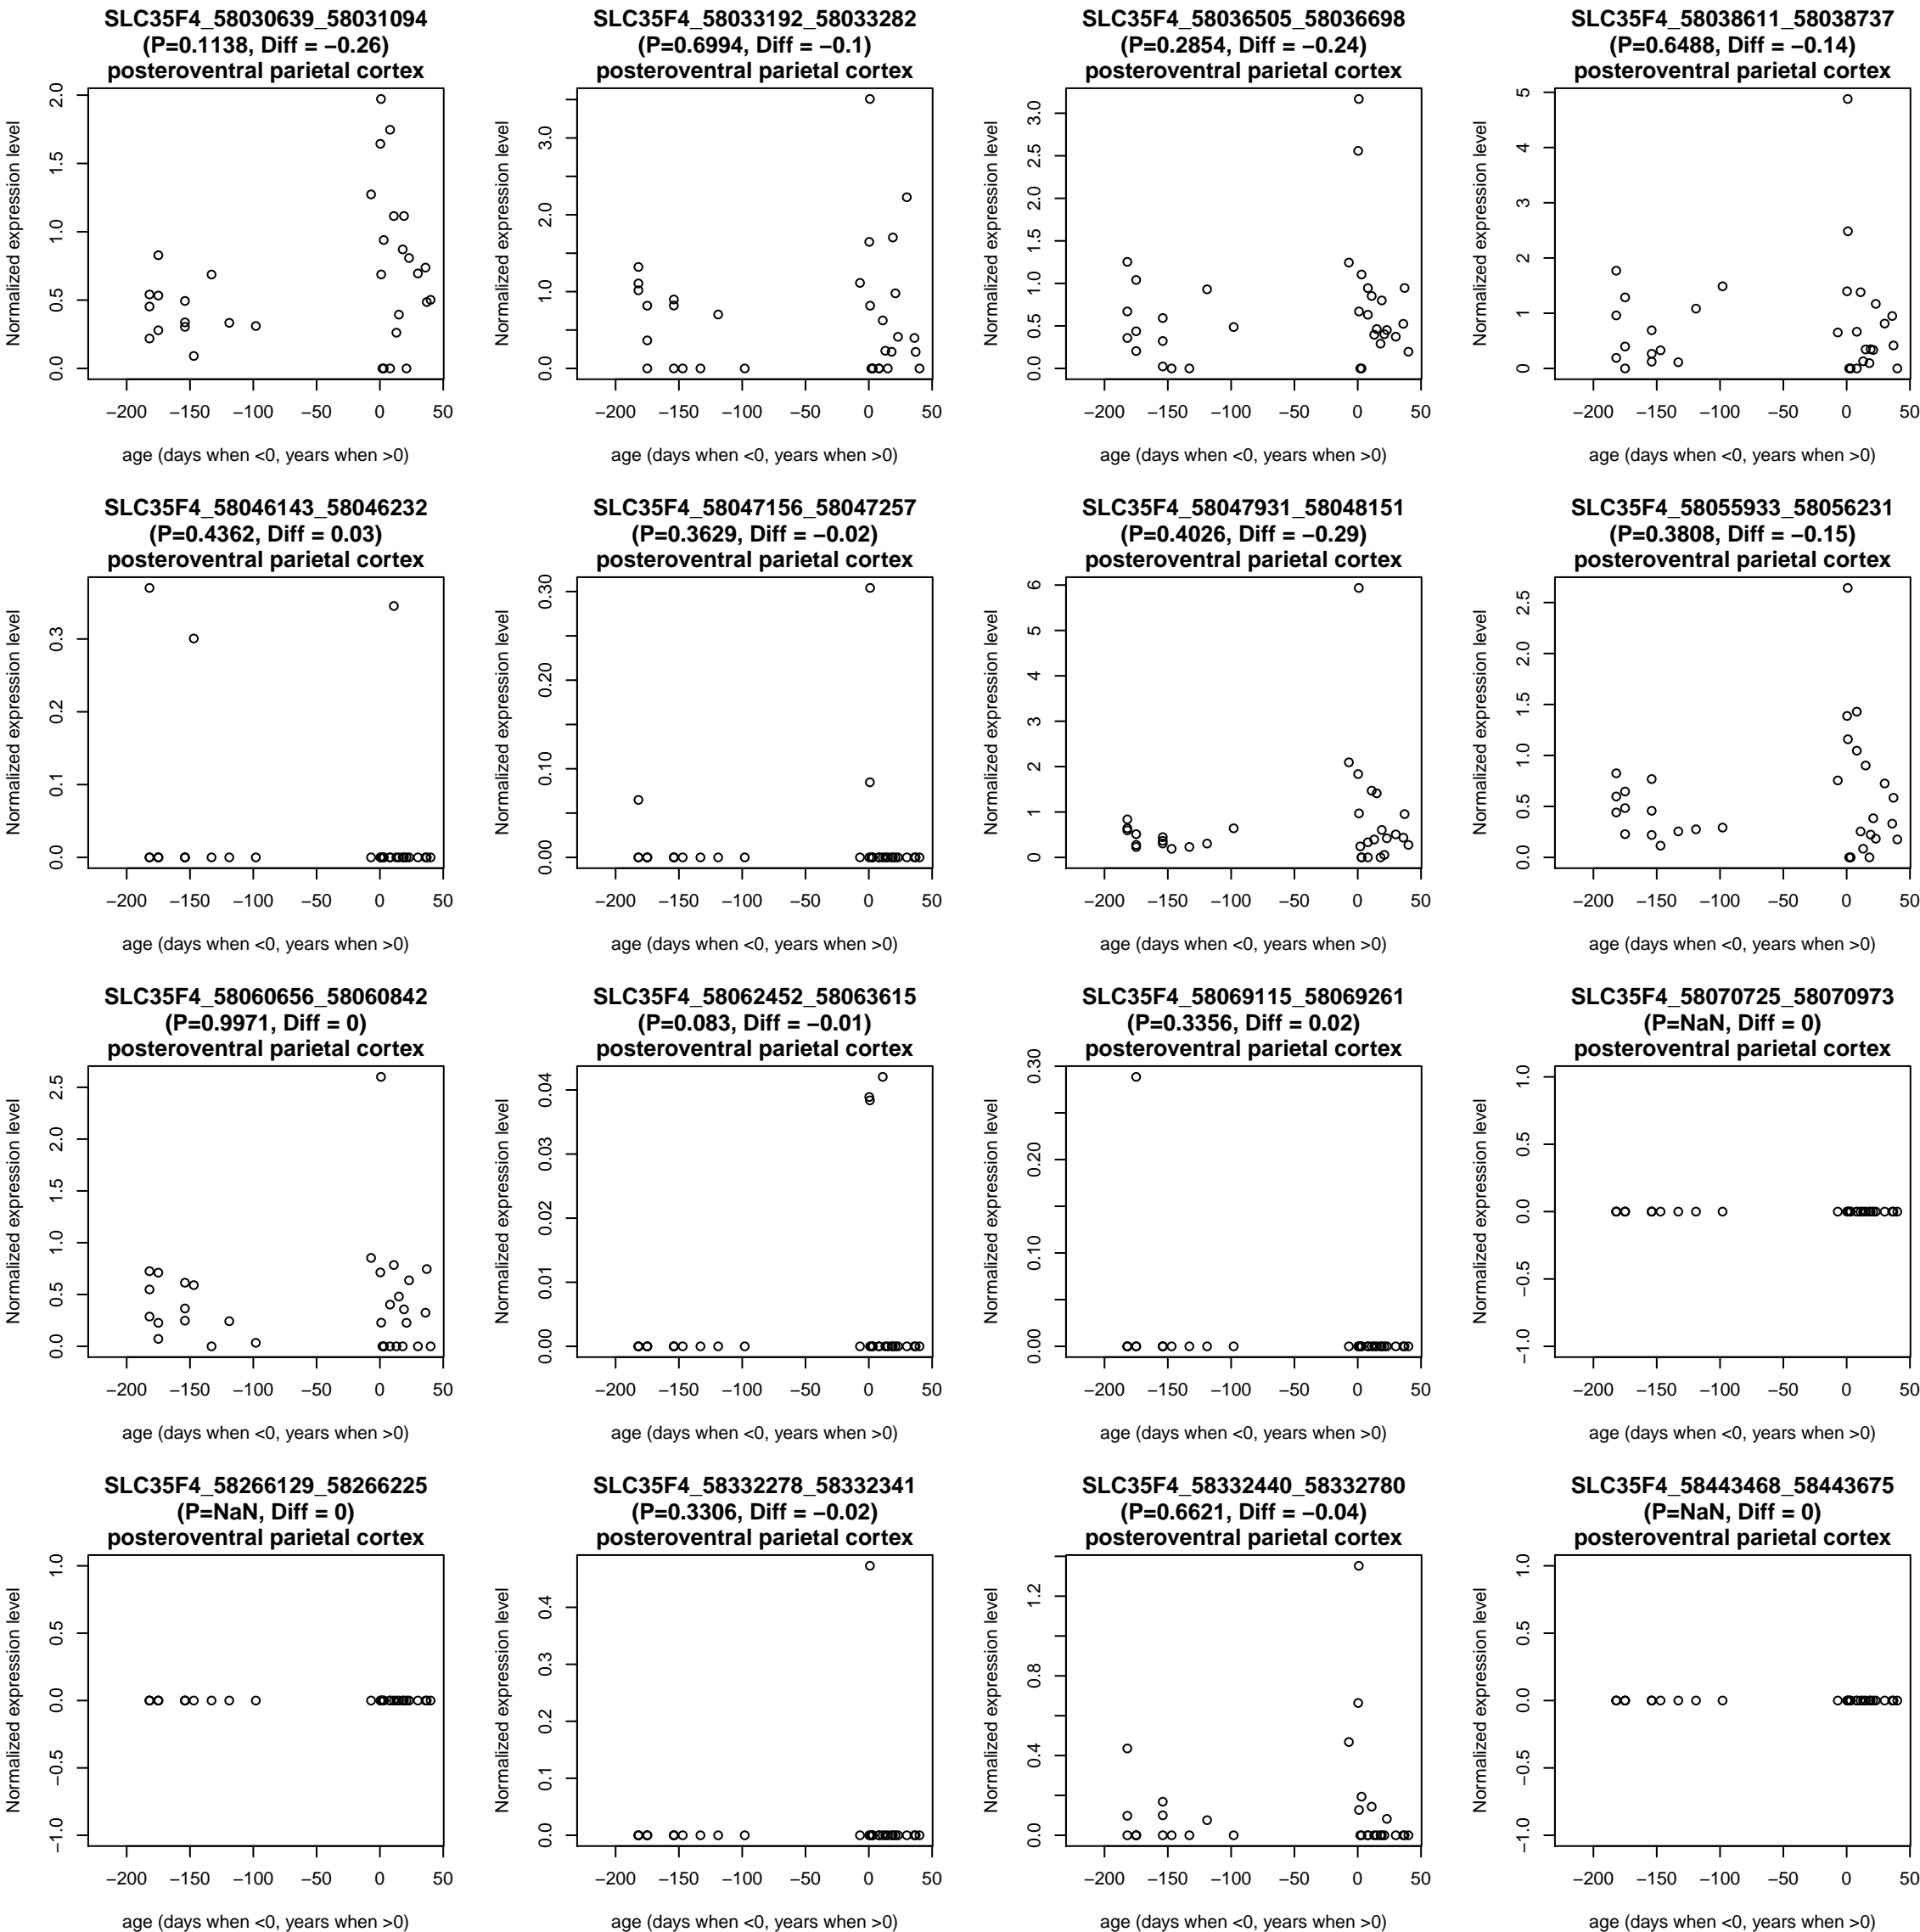

SLC35F4\_58448630\_58448912  
(P=0.3306, Diff = -0.01)  
posteroventral parietal cortex

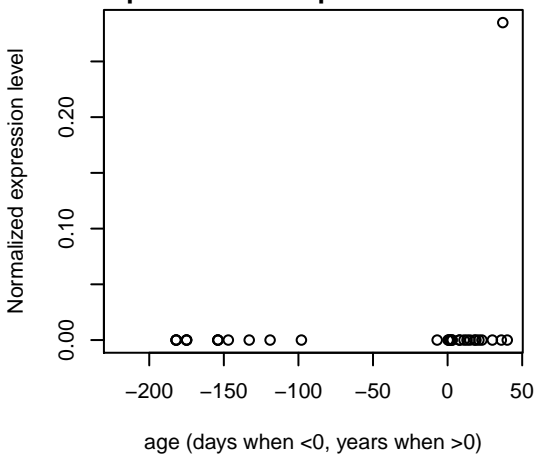

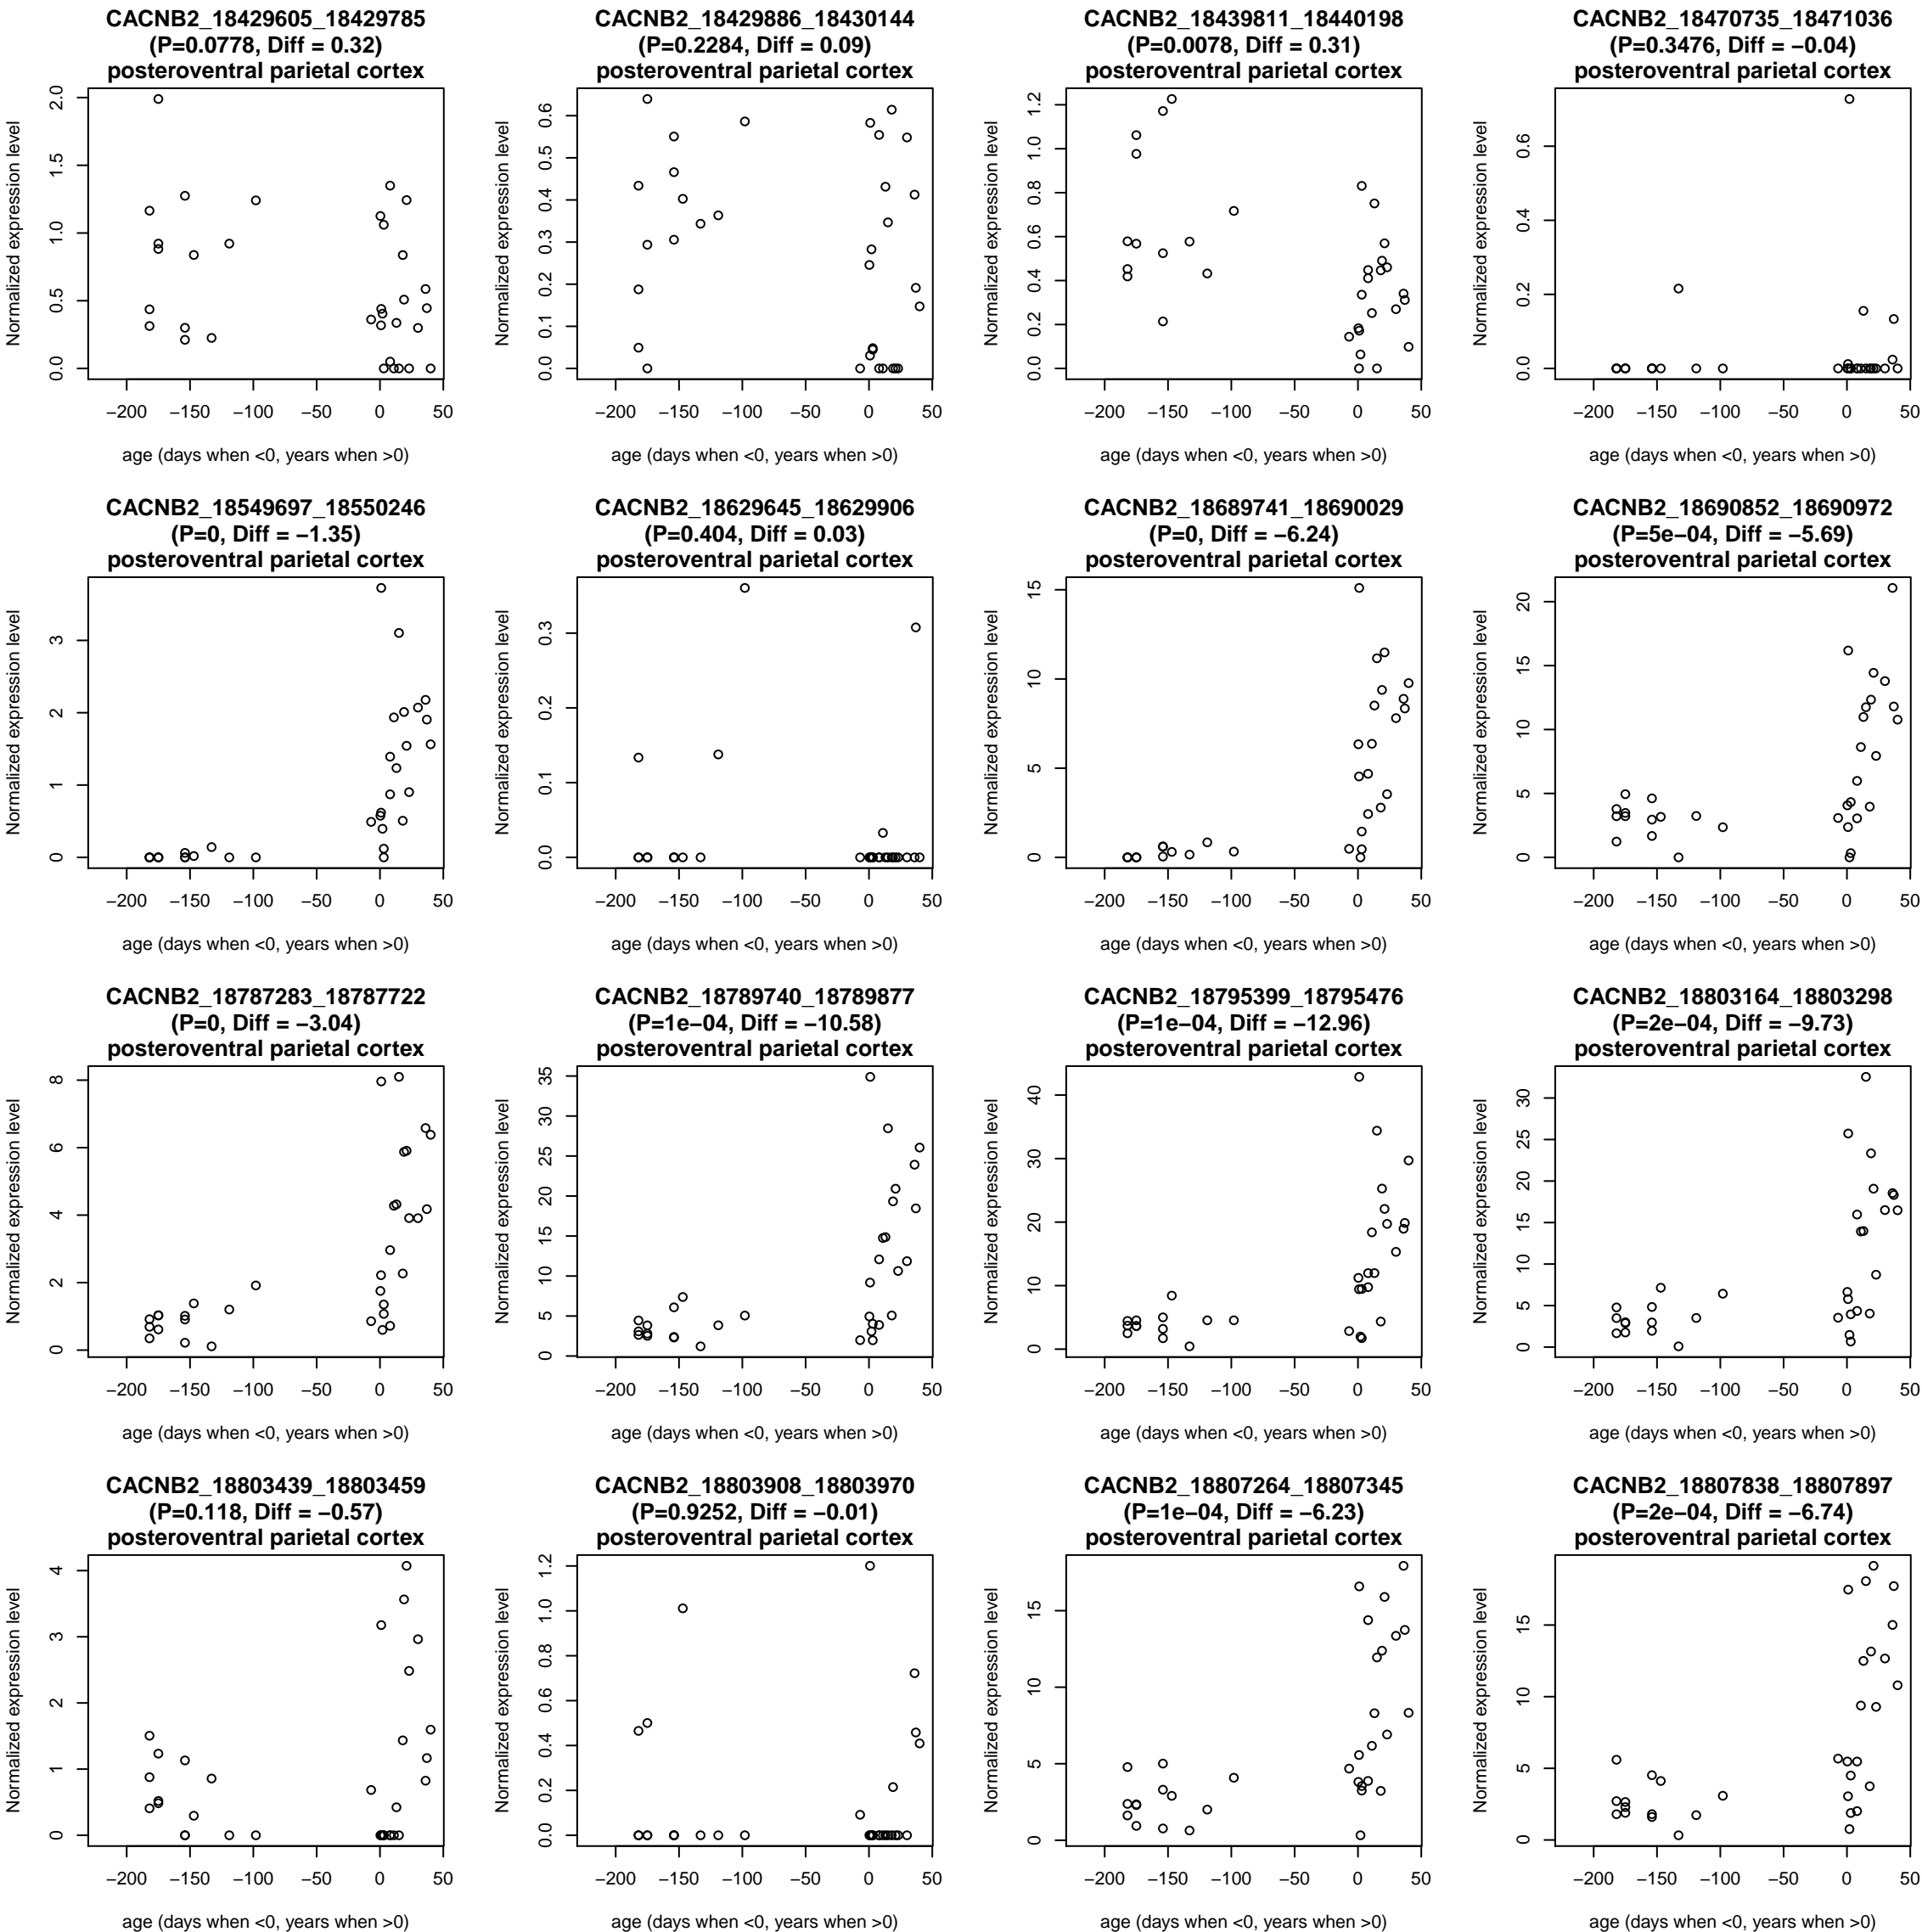

**CACNB2\_18816516\_18816626**  
( $P=2e-04$ , Diff = -11.82)  
posteroventral parietal cortex

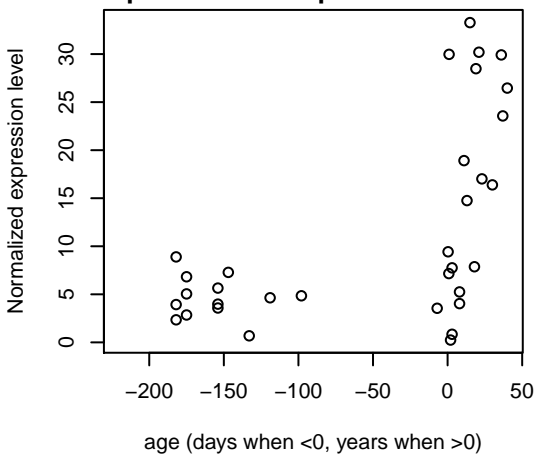

**CACNB2\_18823004\_18823156**  
( $P=1e-04$ , Diff = -9.88)  
posteroventral parietal cortex

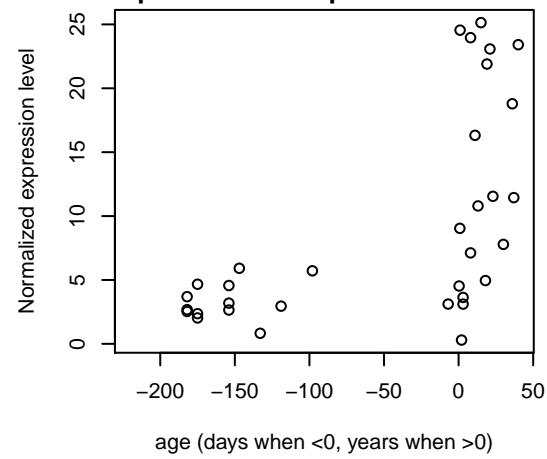

**CACNB2\_18825029\_18825125**  
( $P=1e-04$ , Diff = -9.02)  
posteroventral parietal cortex

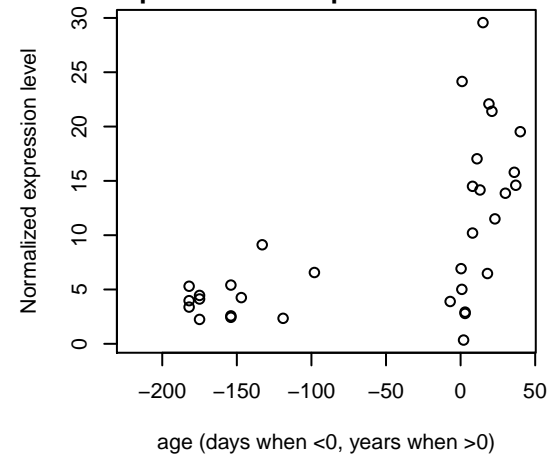

**CACNB2\_18827108\_18827294**  
( $P=1e-04$ , Diff = -11.65)  
posteroventral parietal cortex

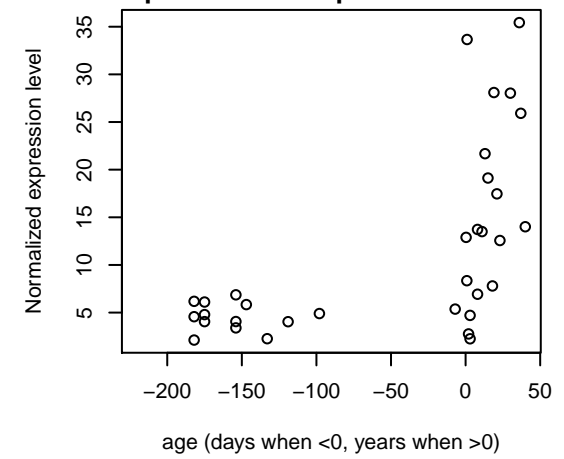

**CACNB2\_18828158\_18830798**  
( $P=0$ , Diff = -9.16)  
posteroventral parietal cortex

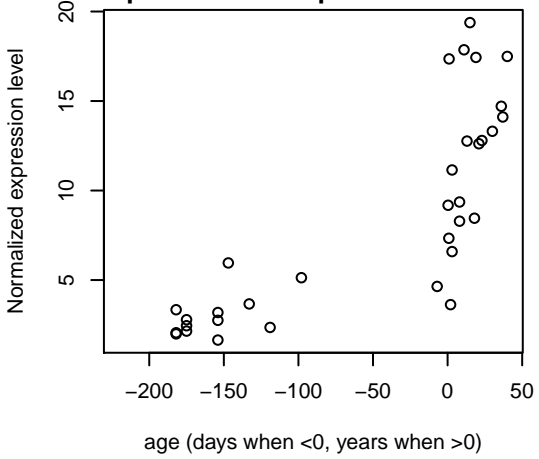

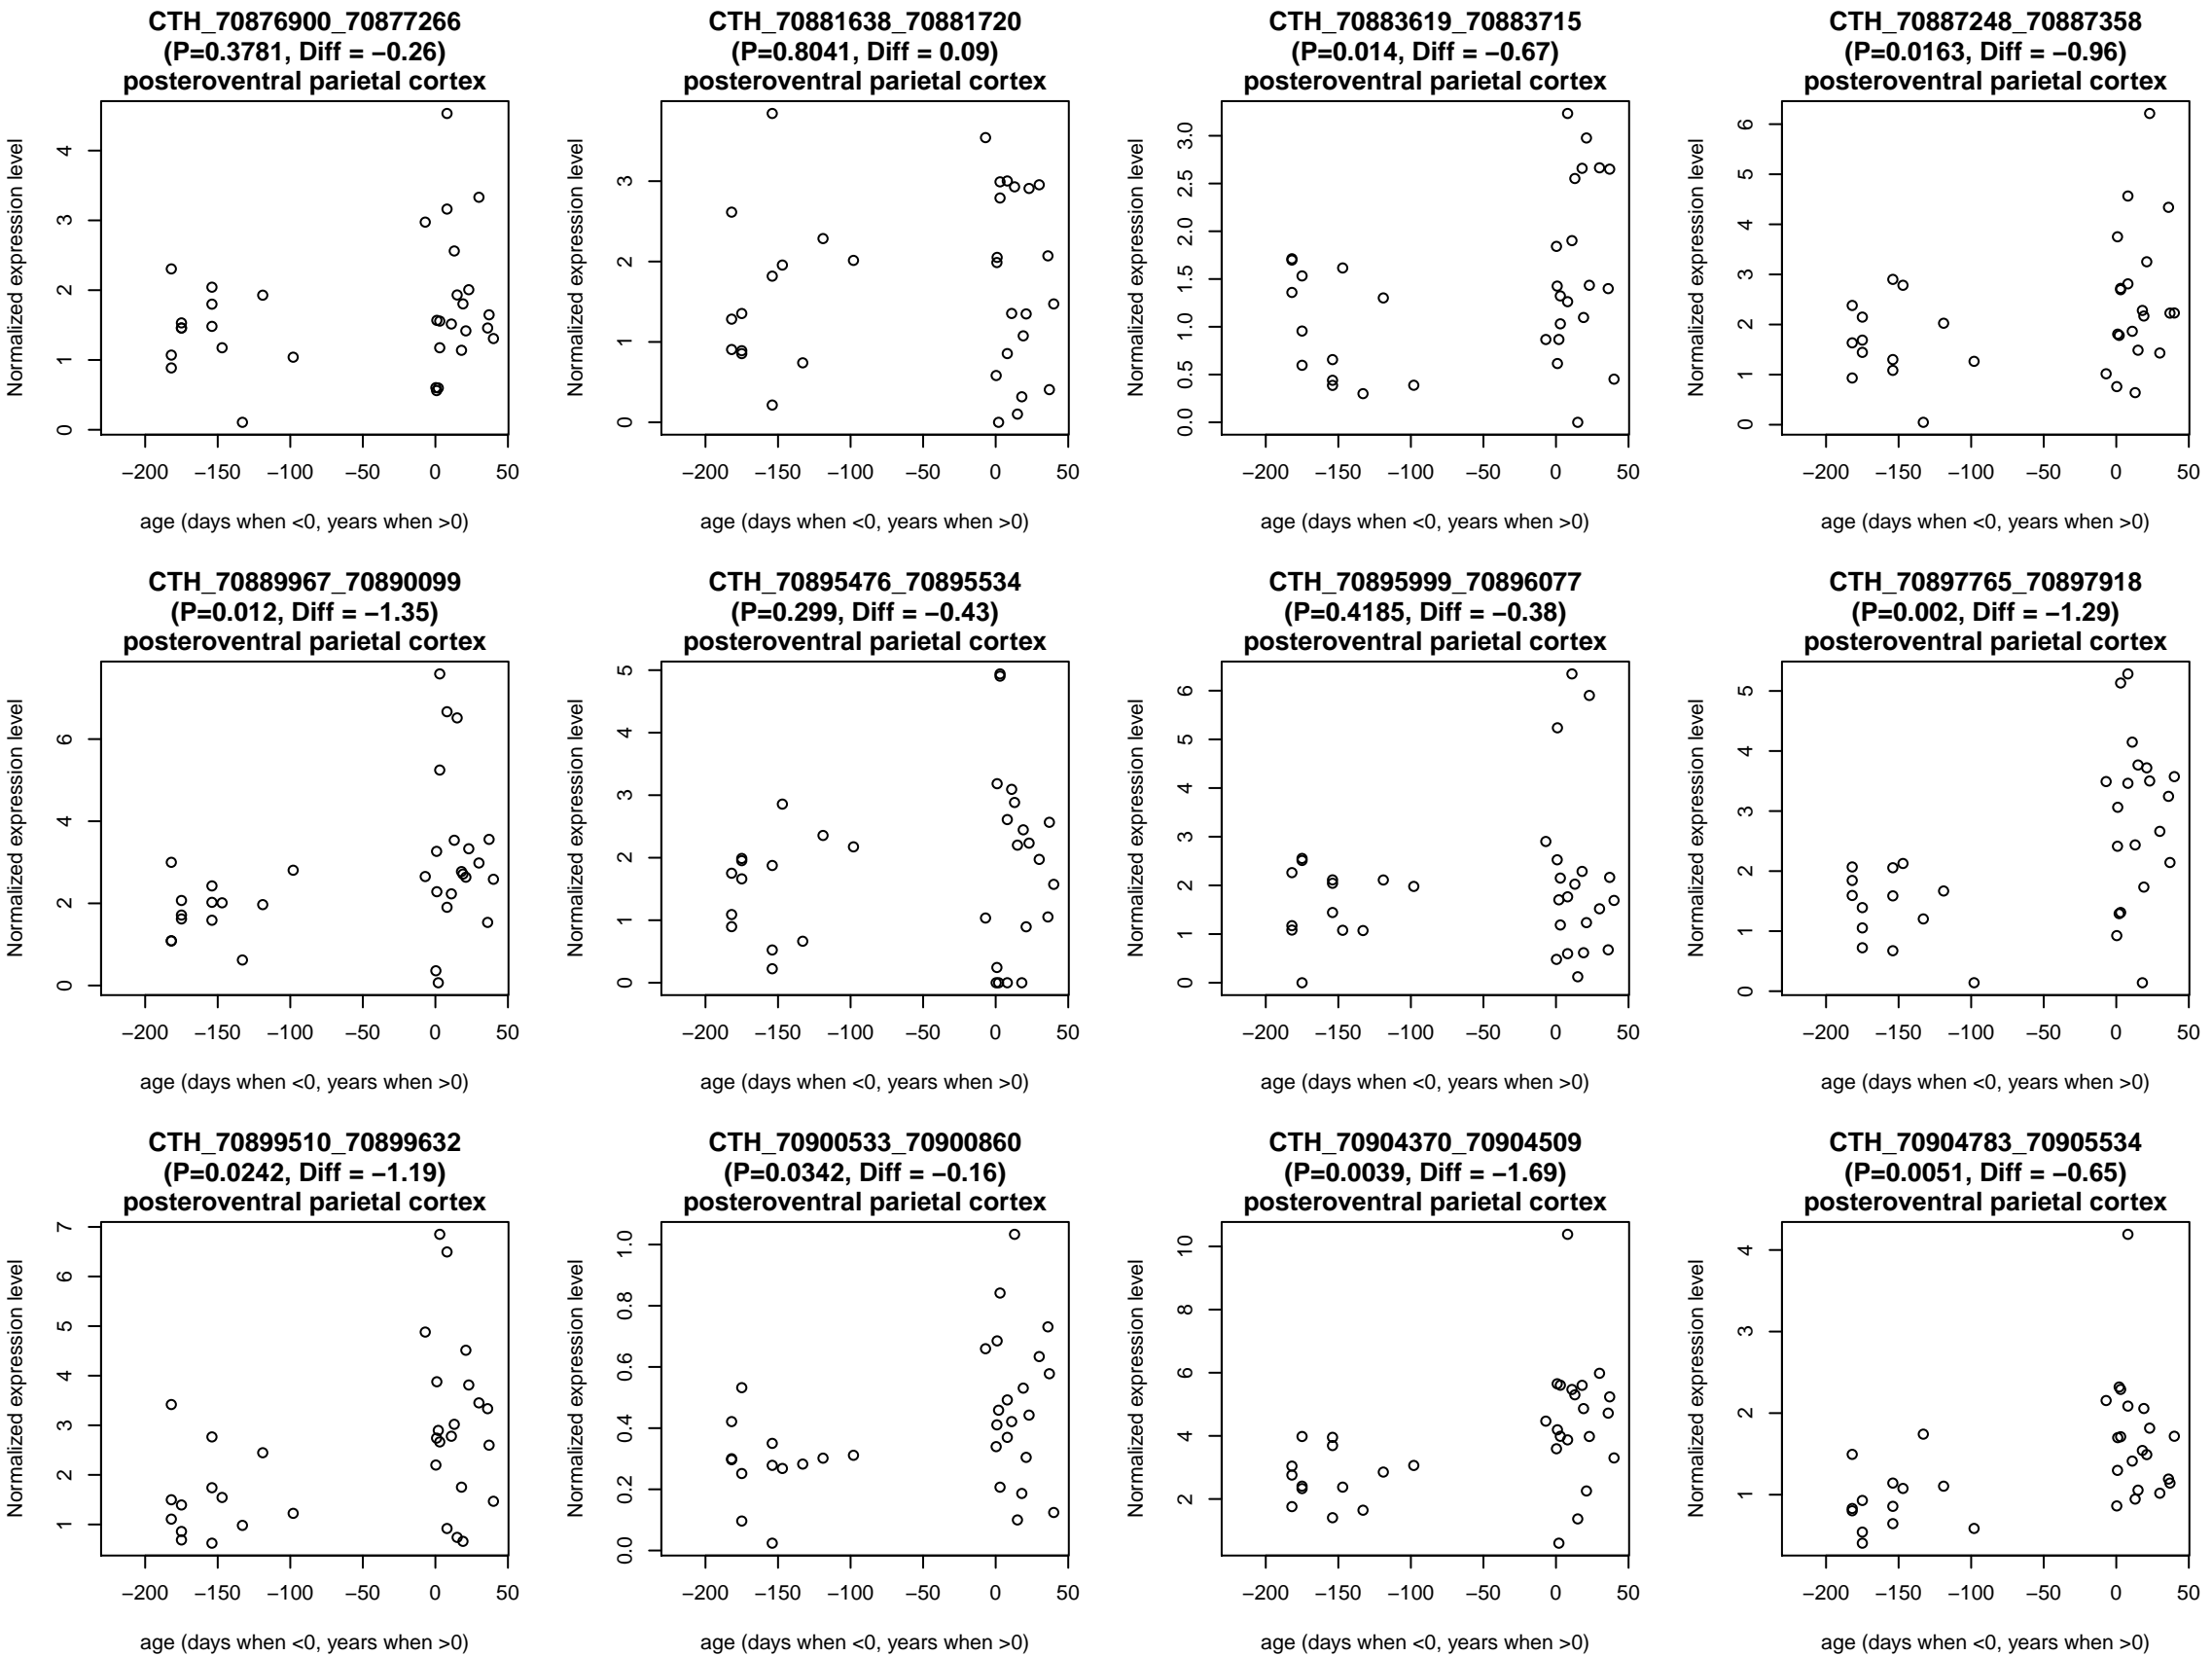

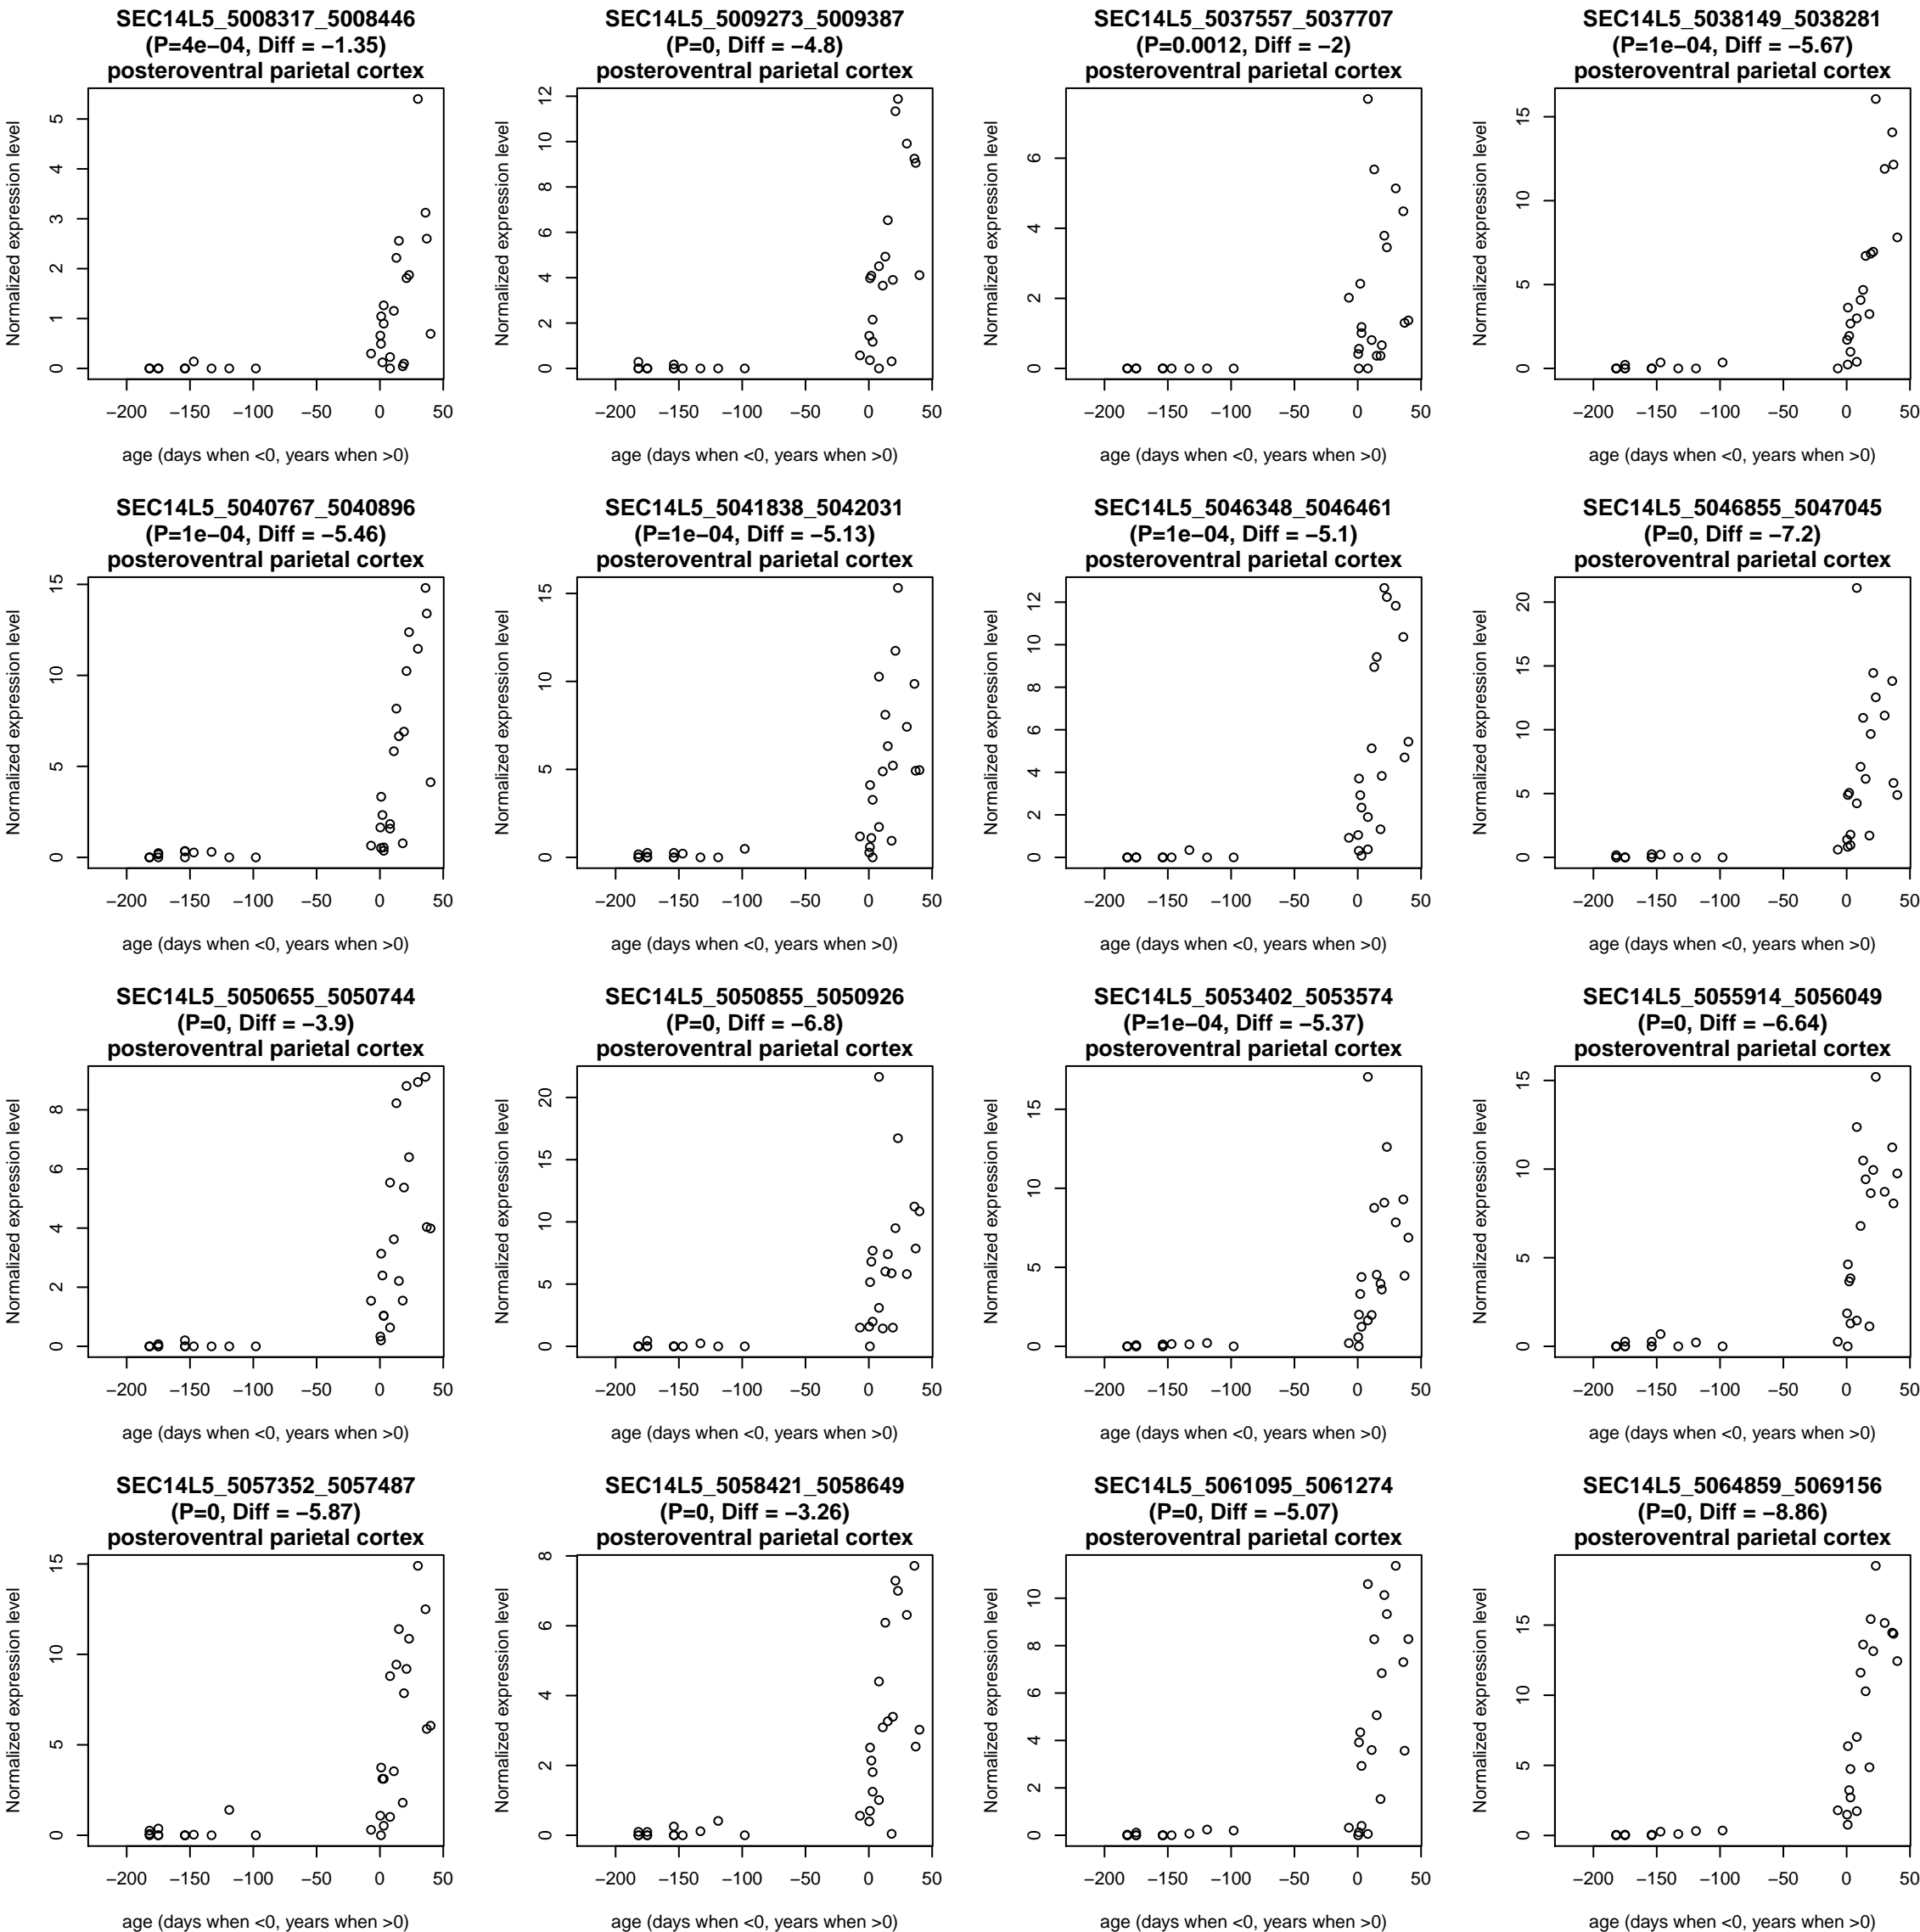

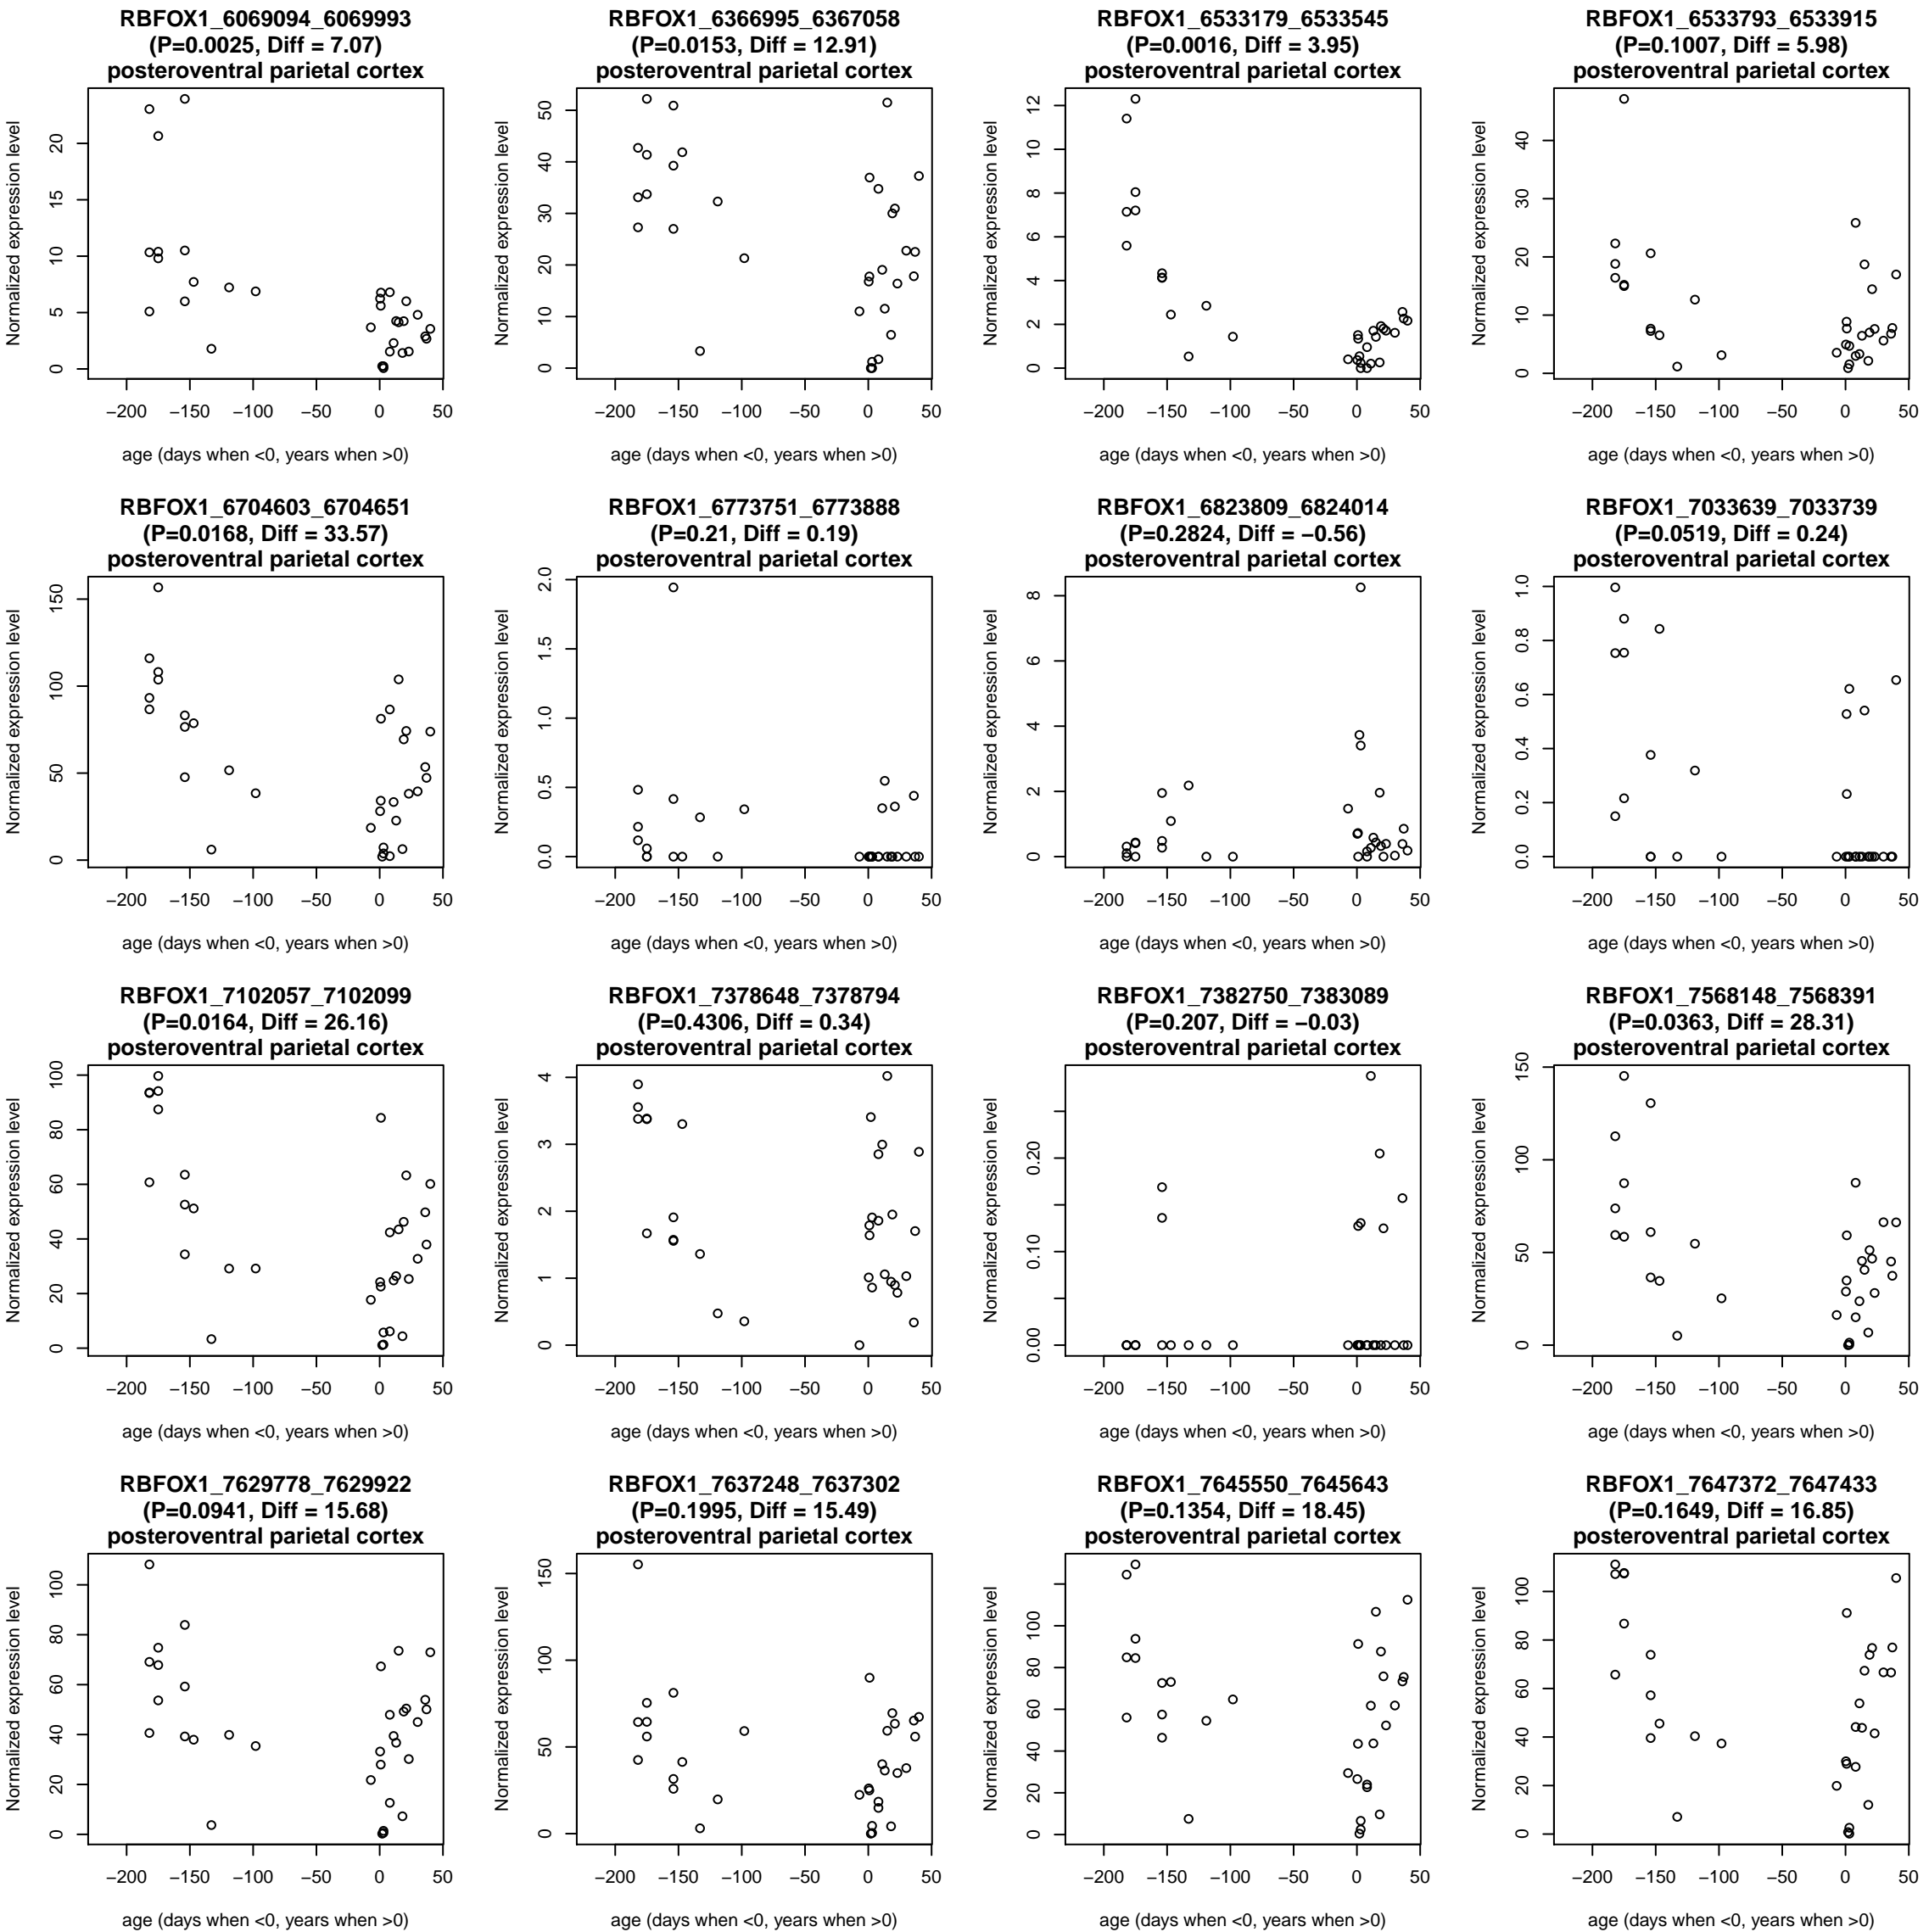

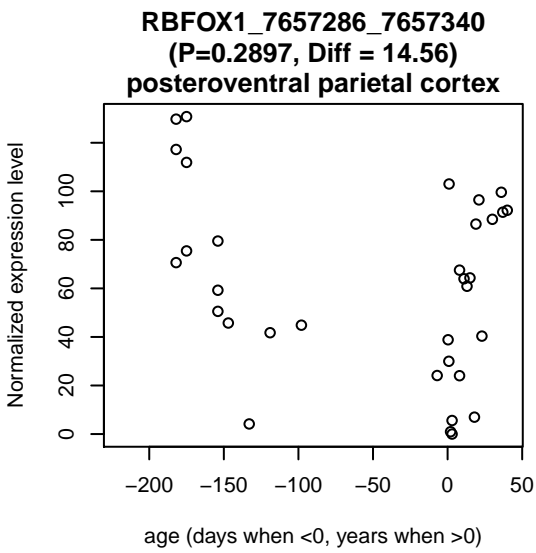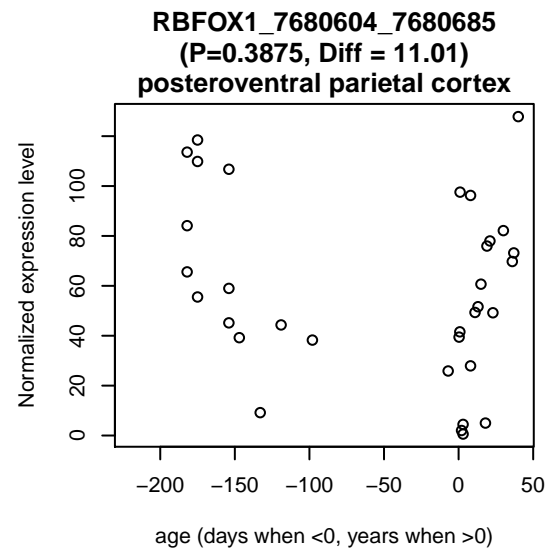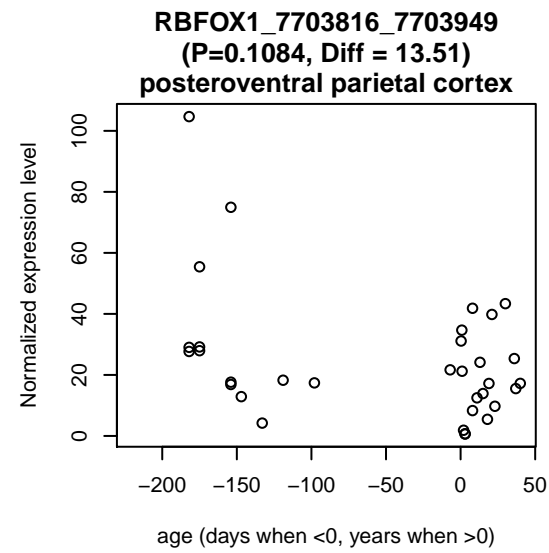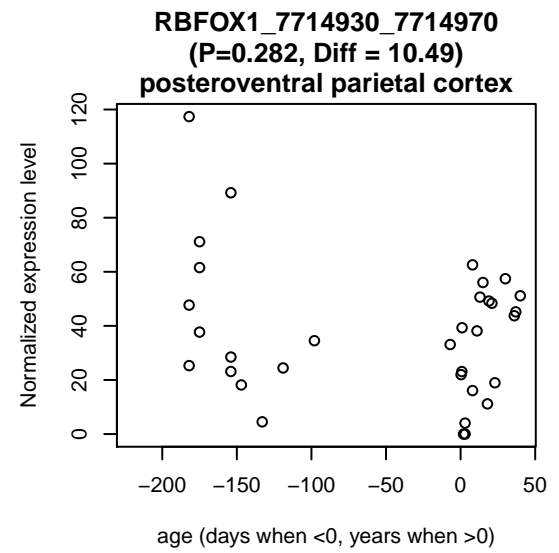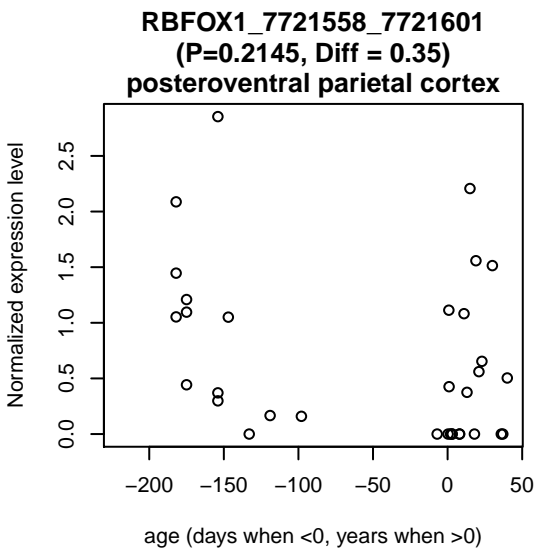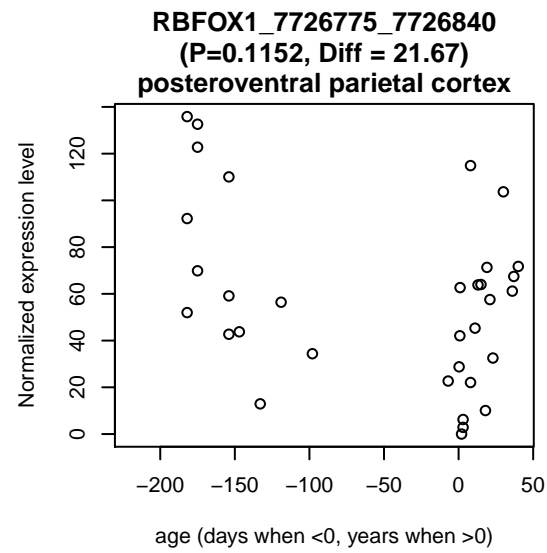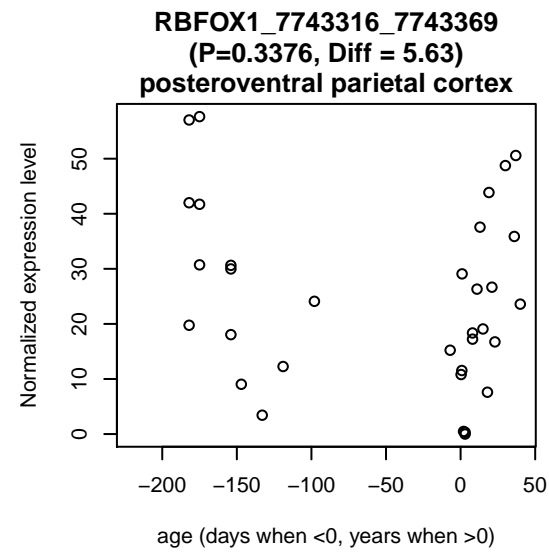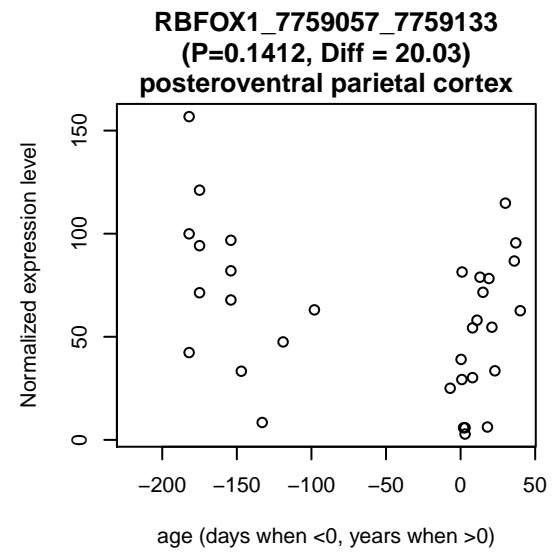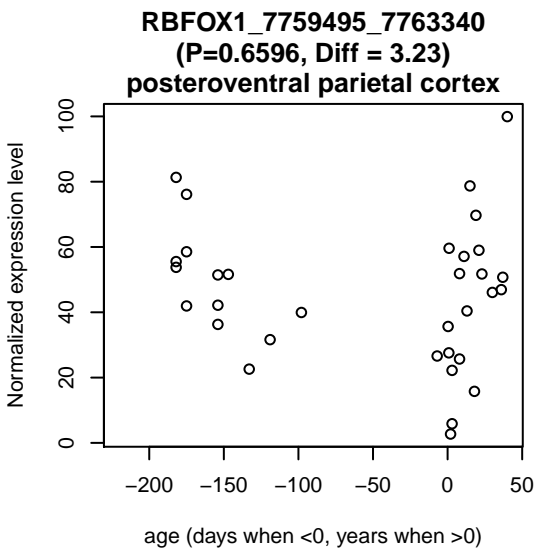



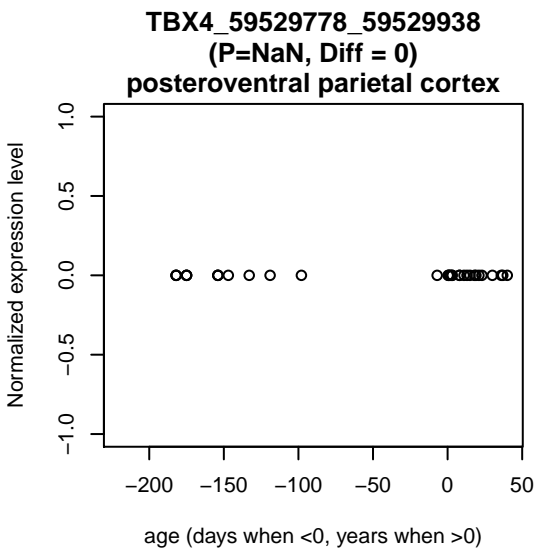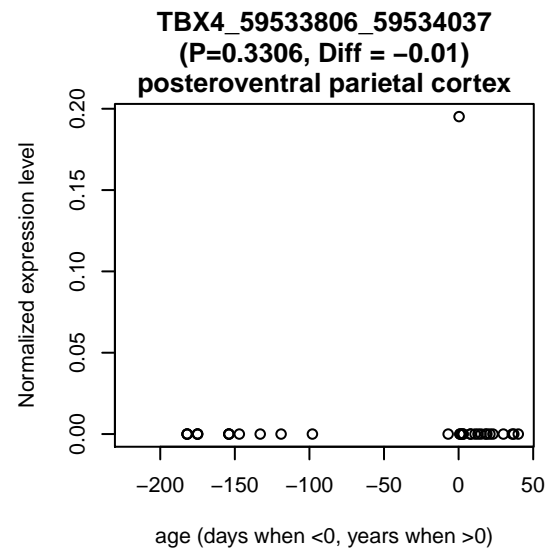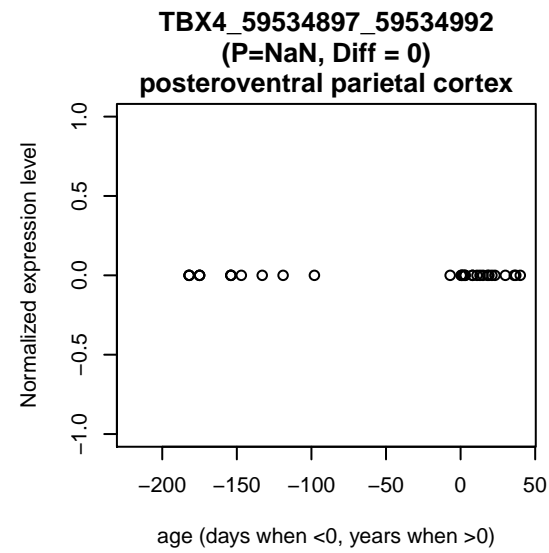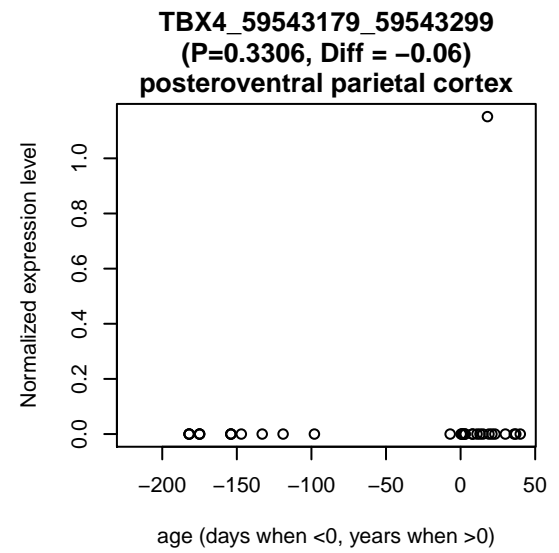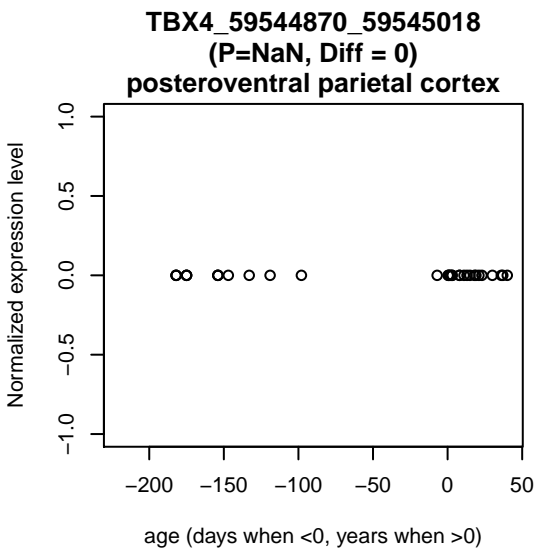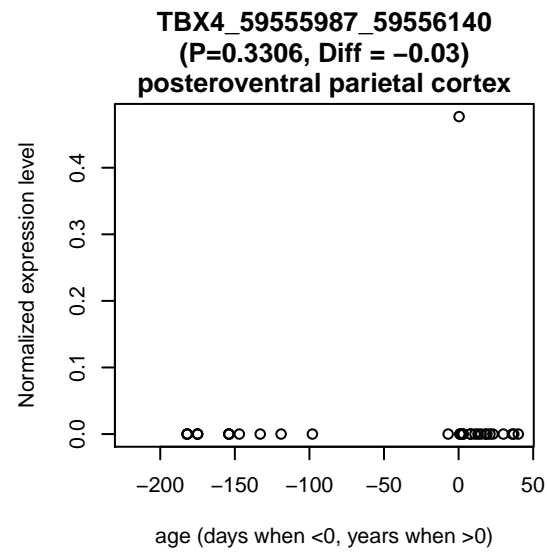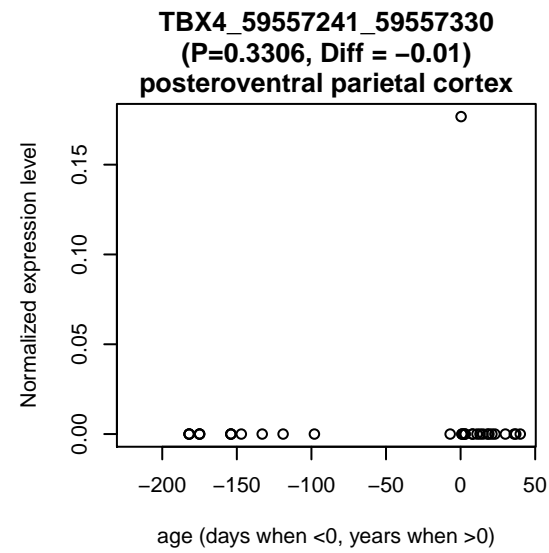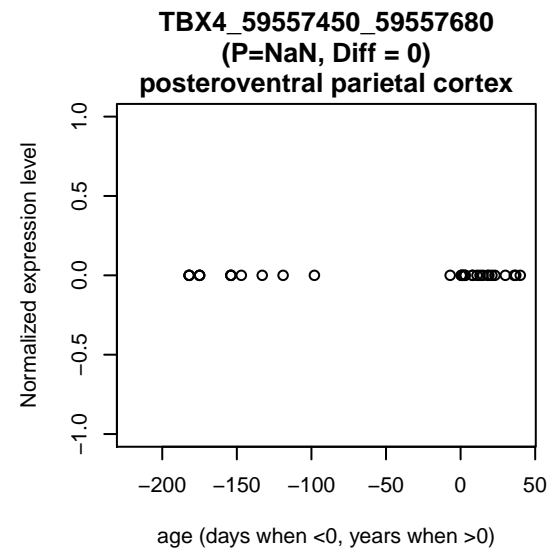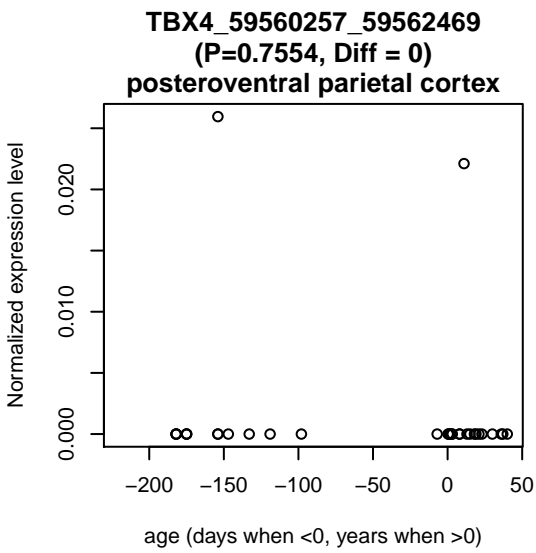

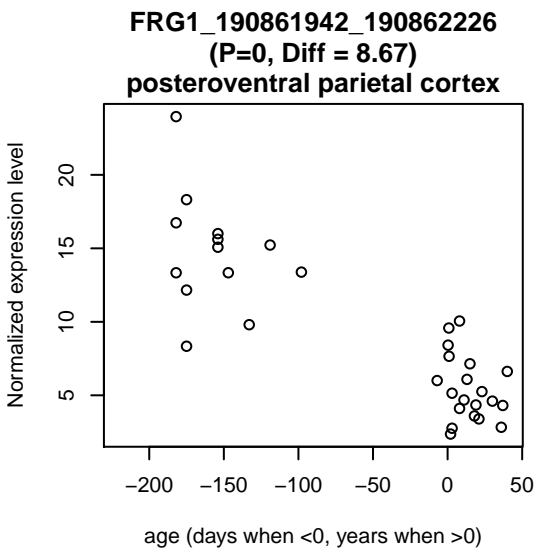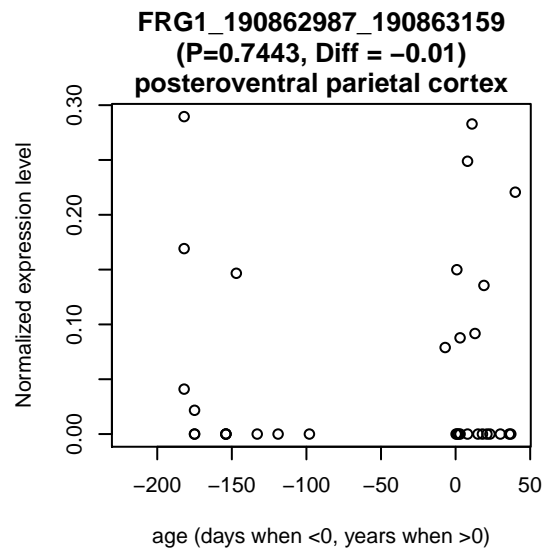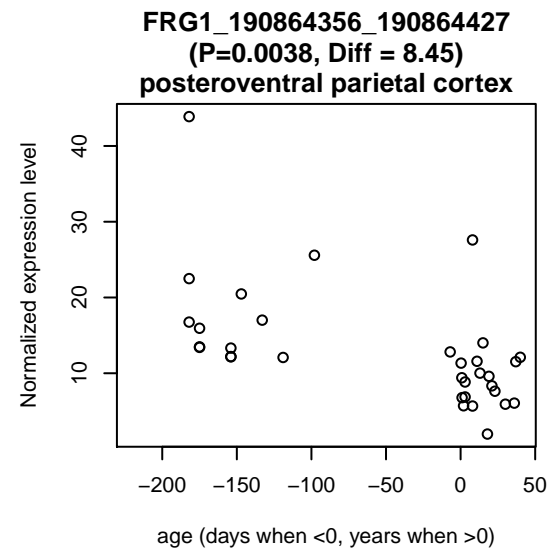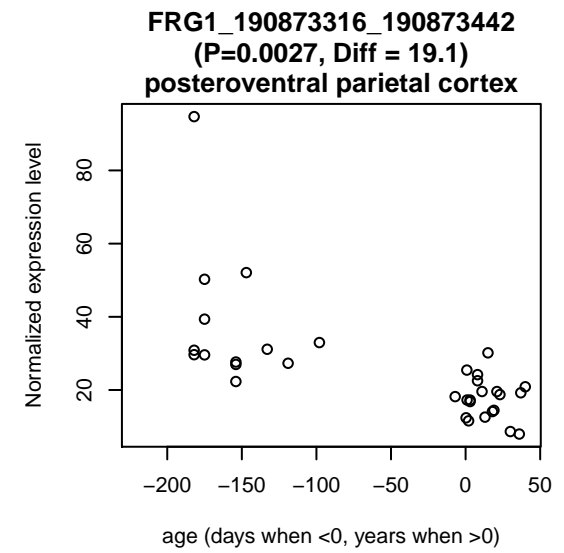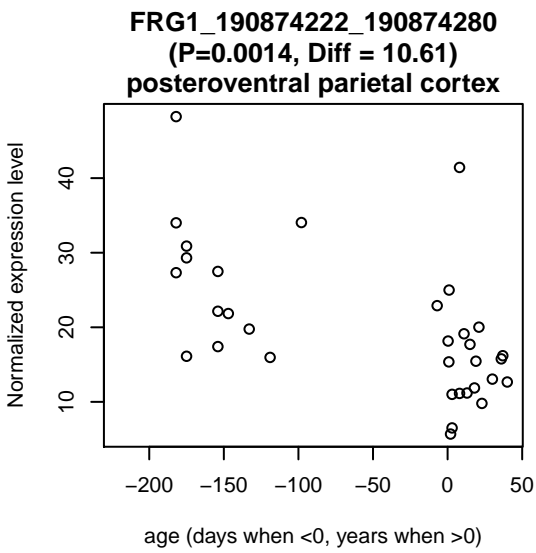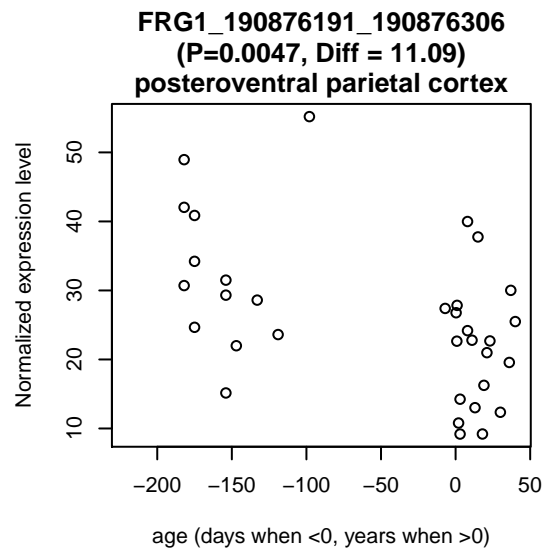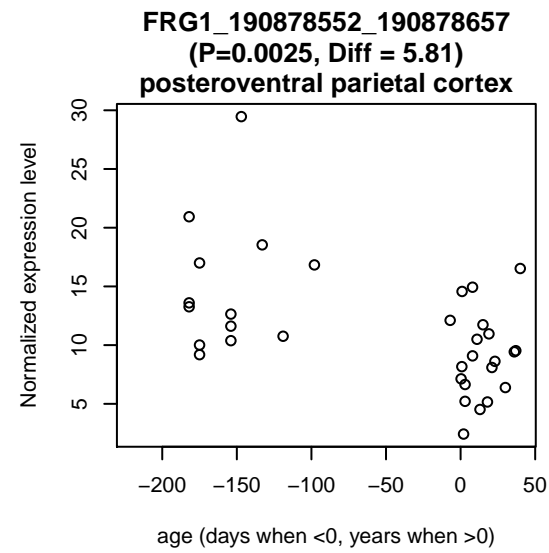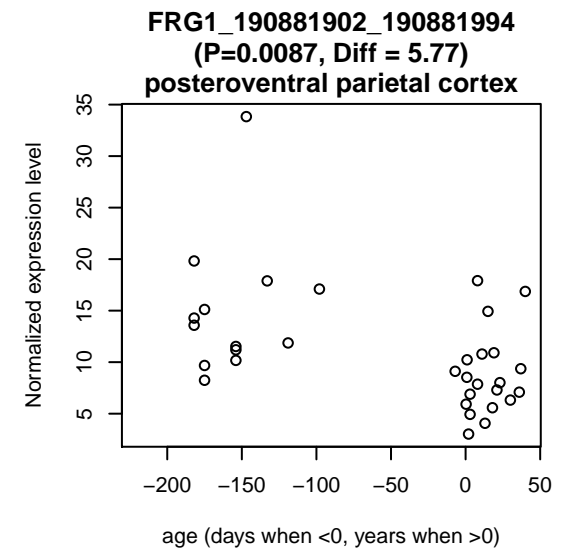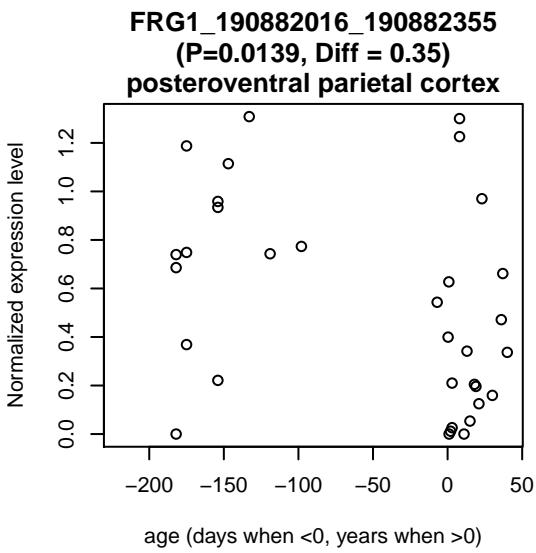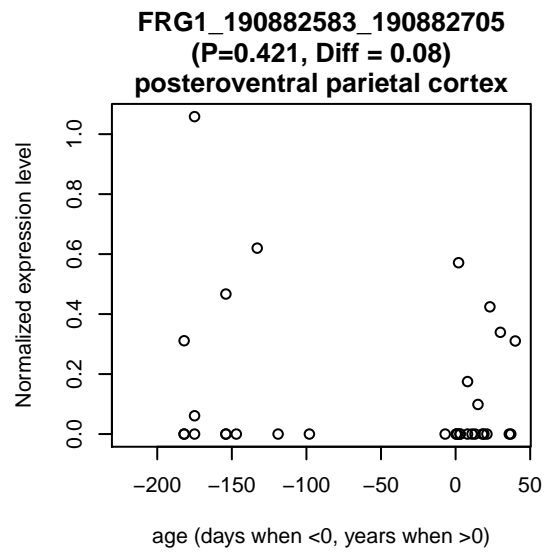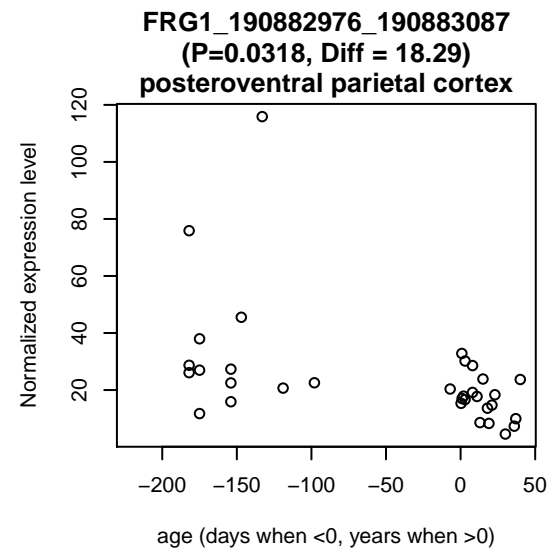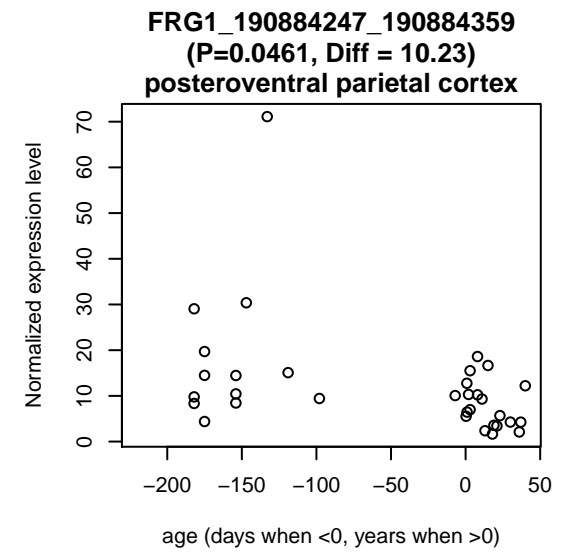

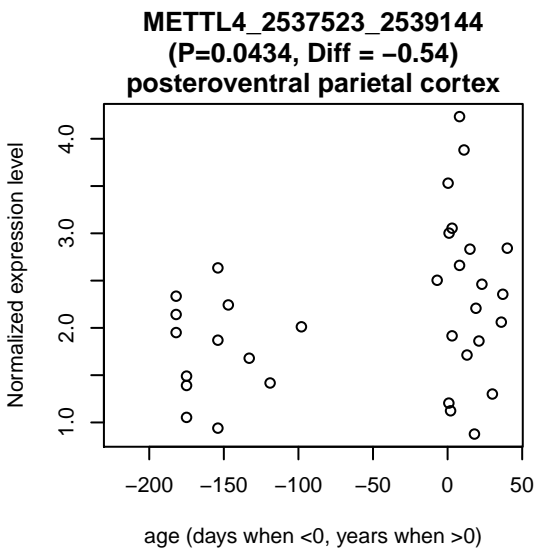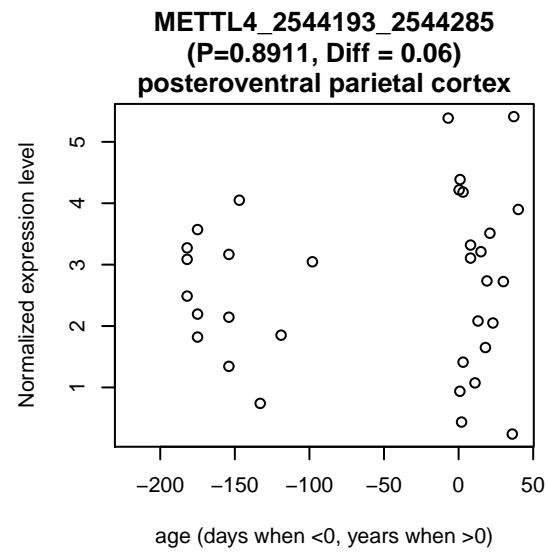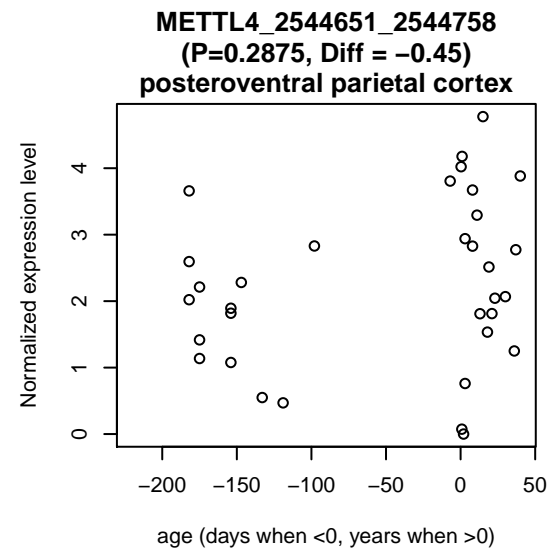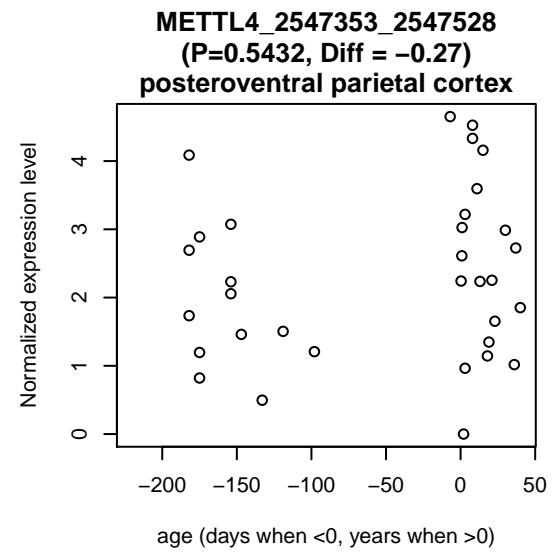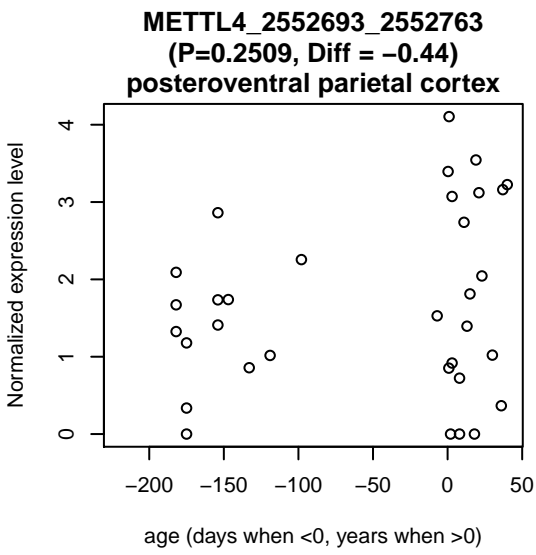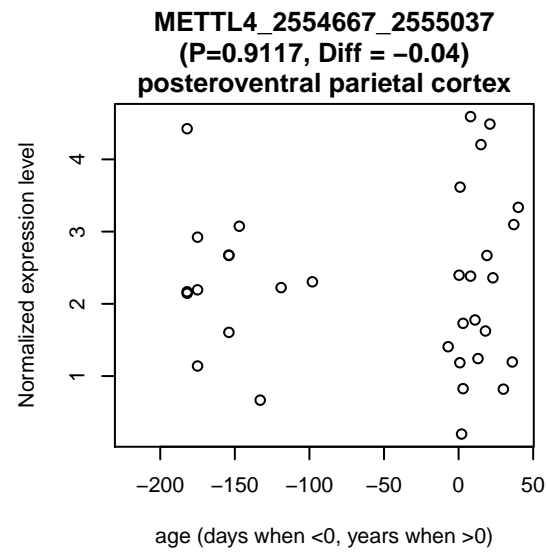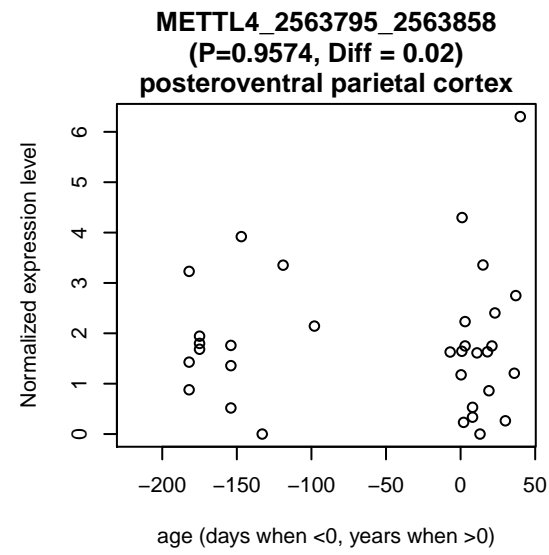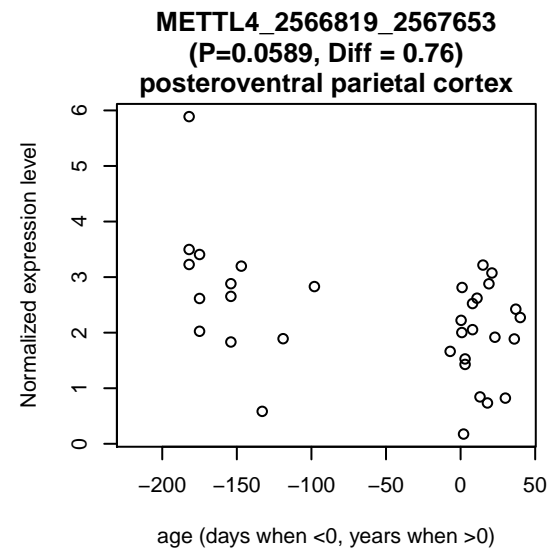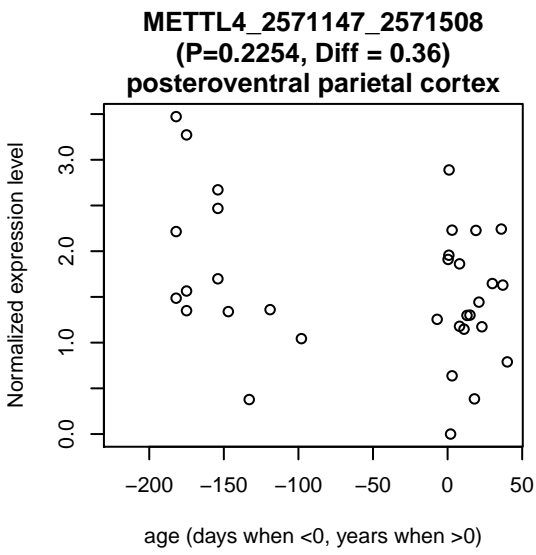

**C7orf11\_40172341\_40172858**  
(P=0.009, Diff = 5.55)  
posteroventral parietal cortex

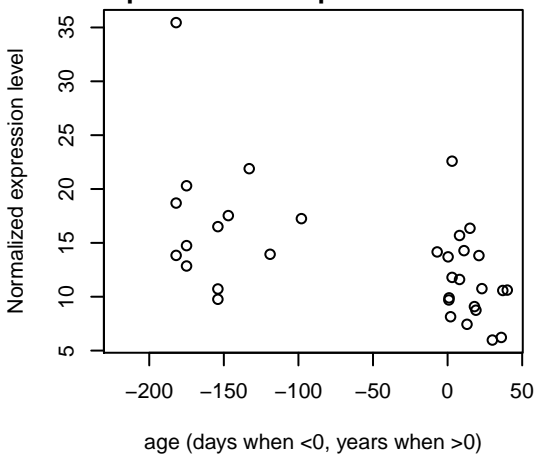

**C7orf11\_40173827\_40174258**  
(P=0.0133, Diff = 5.45)  
posteroventral parietal cortex

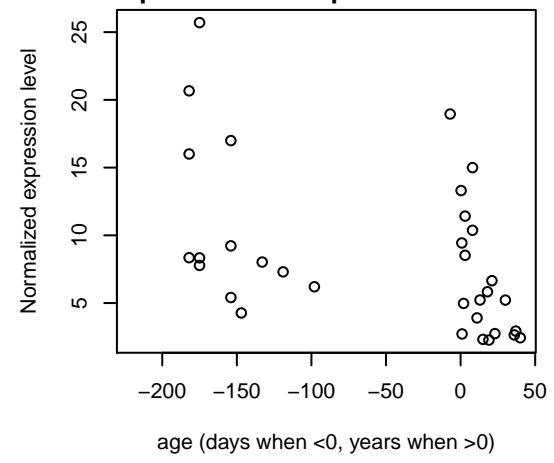

**KLF13\_31619057\_31619992**  
(P=0.98, Diff = 0.01)  
primary auditory cortex

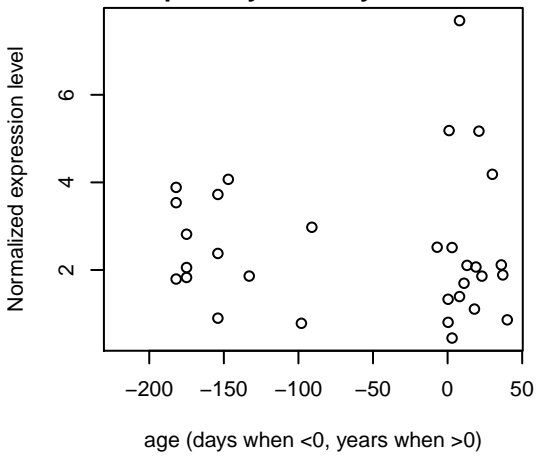

**KLF13\_31632135\_31632190**  
(P=0.4441, Diff = -0.07)  
primary auditory cortex

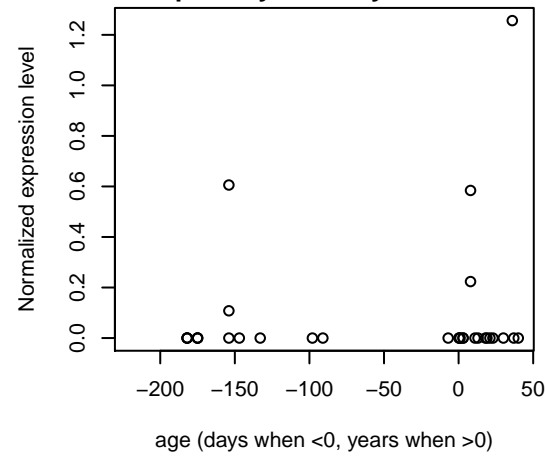

**KLF13\_31658356\_31658757**  
(P=0.0024, Diff = -0.57)  
primary auditory cortex

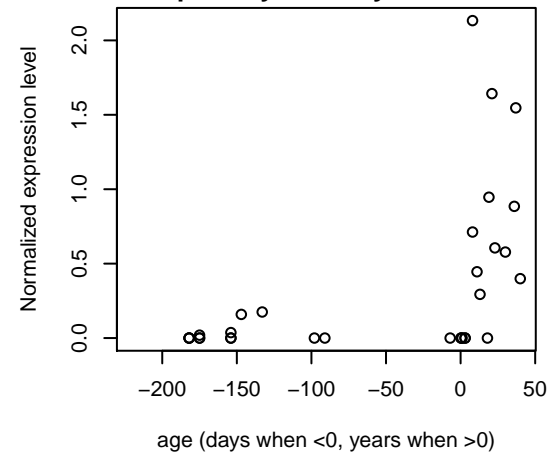

**KLF13\_31664212\_31670102**  
(P=0, Diff = -11.47)  
primary auditory cortex

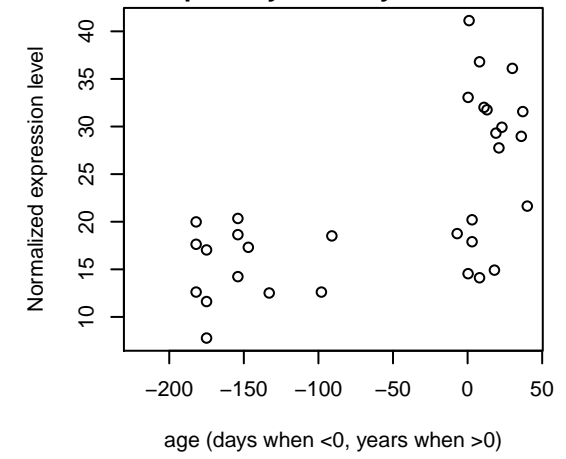

**KLF13\_31685045\_31685458**  
(P=0.0041, Diff = -0.28)  
primary auditory cortex

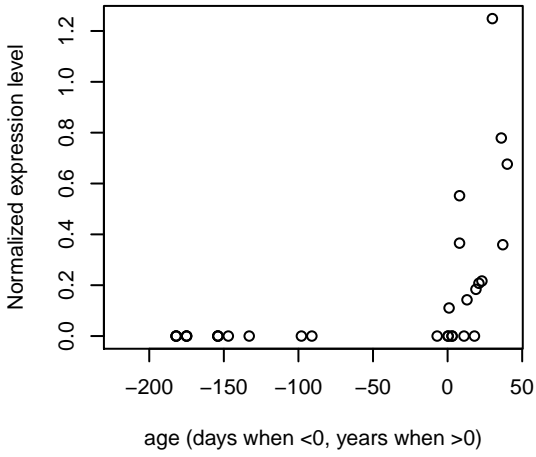

**KLF13\_31685777\_31685894**  
(P=0.0093, Diff = -0.45)  
primary auditory cortex

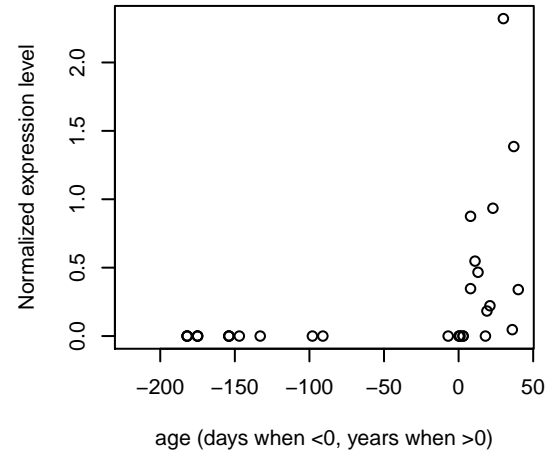

**KLF13\_31695630\_31696113**  
(P=3e-04, Diff = -0.64)  
primary auditory cortex

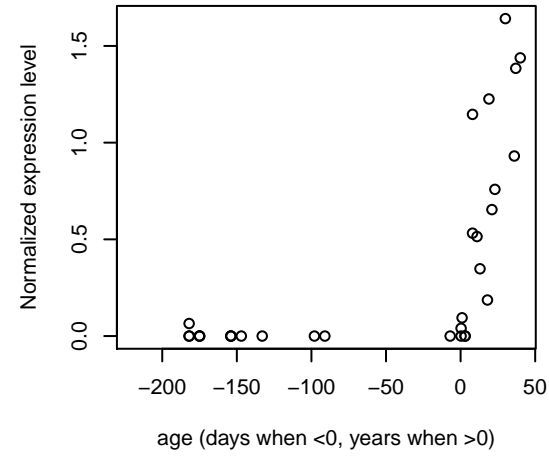

**KLF13\_31727572\_31727868**  
(P=0.0196, Diff = -0.51)  
primary auditory cortex

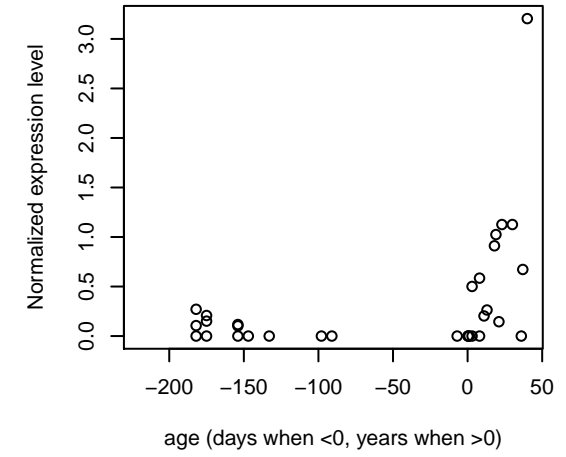

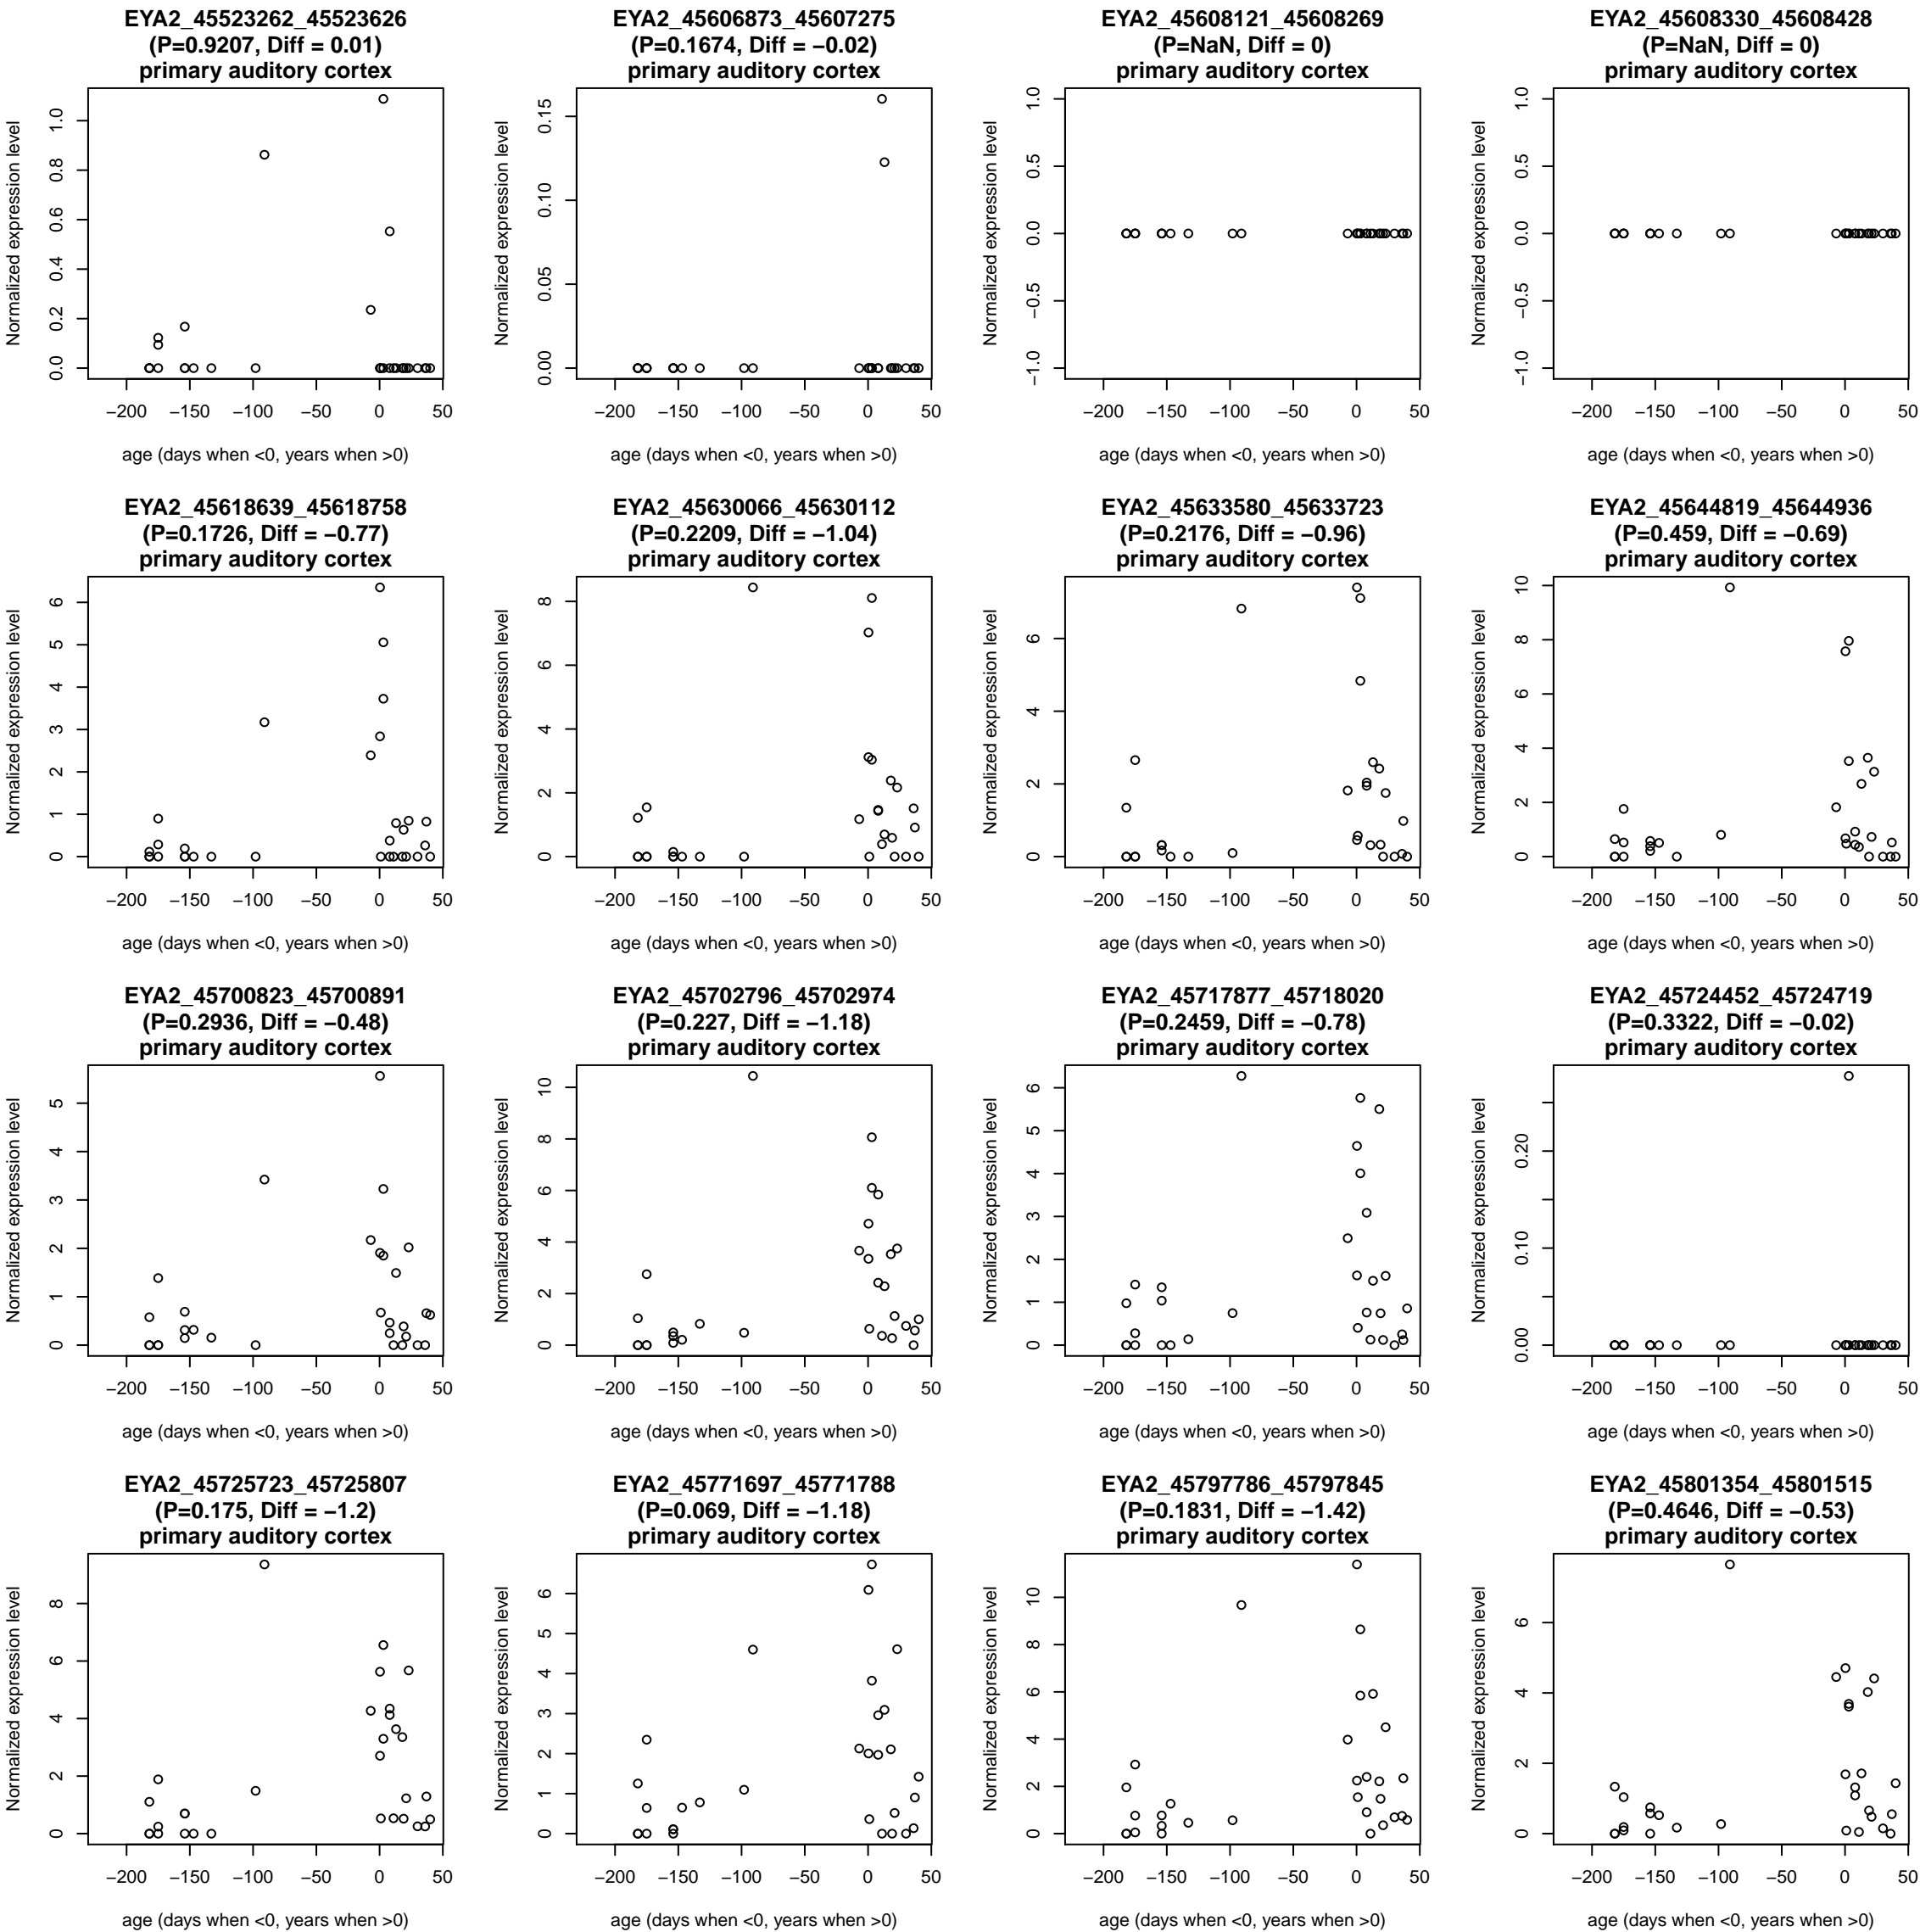

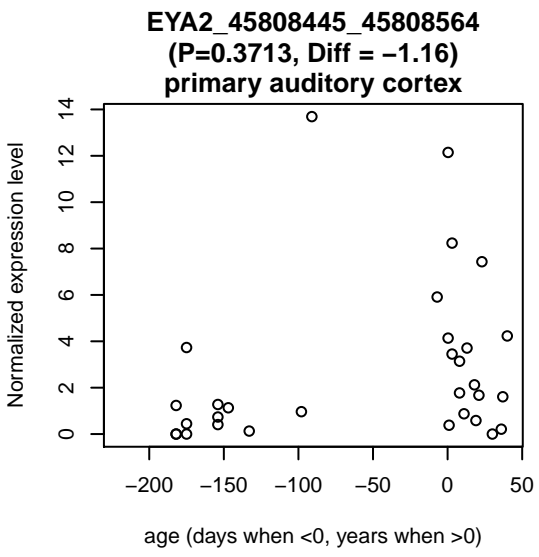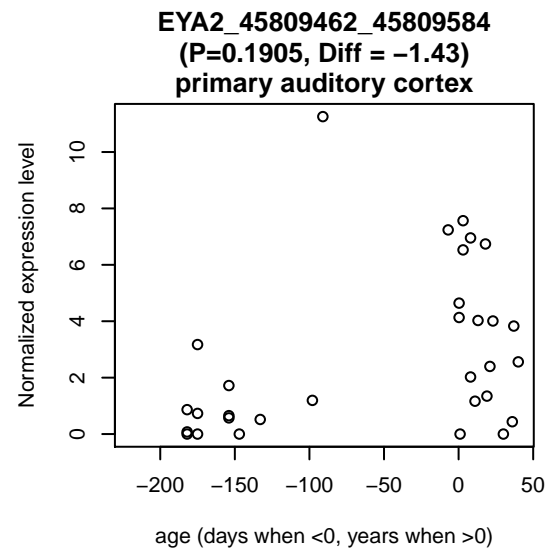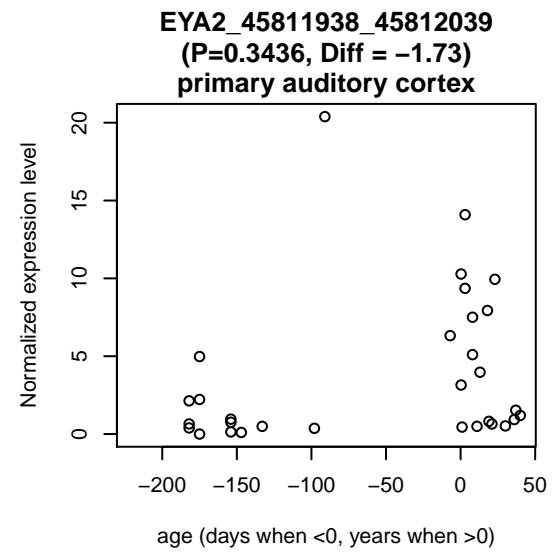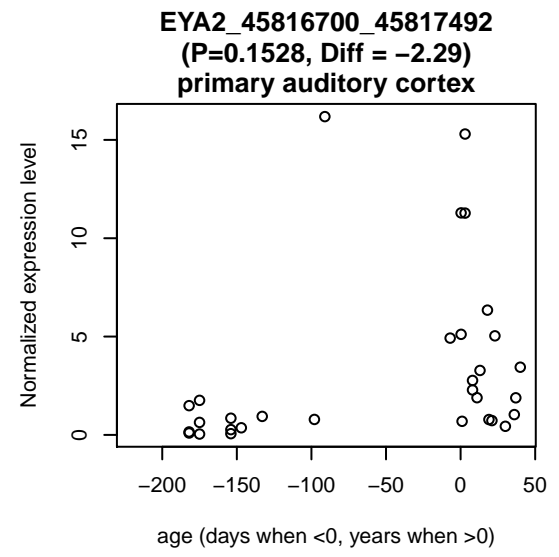

**LMCD1\_8543392\_8543666**  
(P=0.6305, Diff = -0.1)  
primary auditory cortex

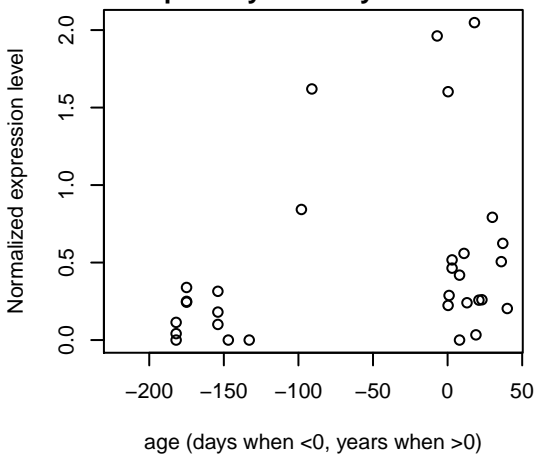

**LMCD1\_8556610\_8556681**  
(P=0.4906, Diff = -0.04)  
primary auditory cortex

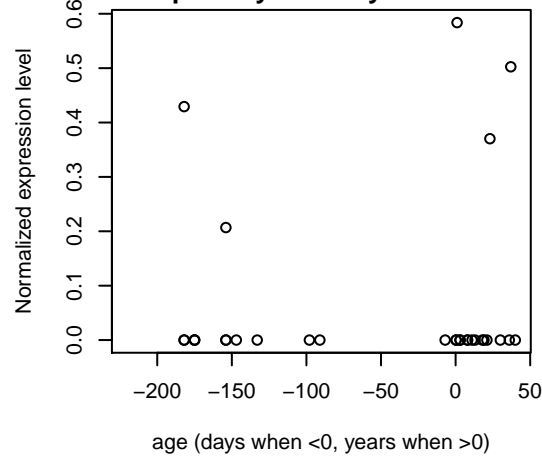

**LMCD1\_8574422\_8574511**  
(P=0.0448, Diff = -2.15)  
primary auditory cortex

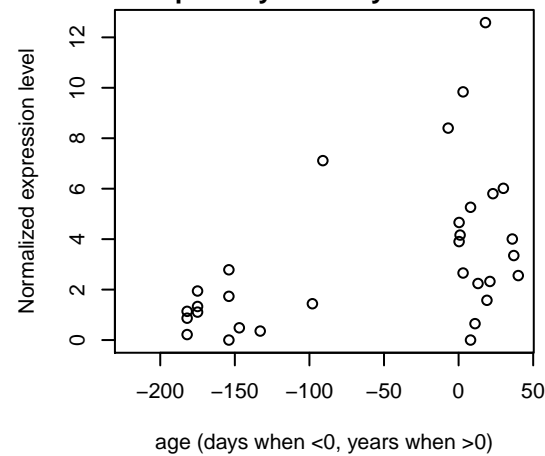

**LMCD1\_8578868\_8579204**  
(P=0.1296, Diff = -1.2)  
primary auditory cortex

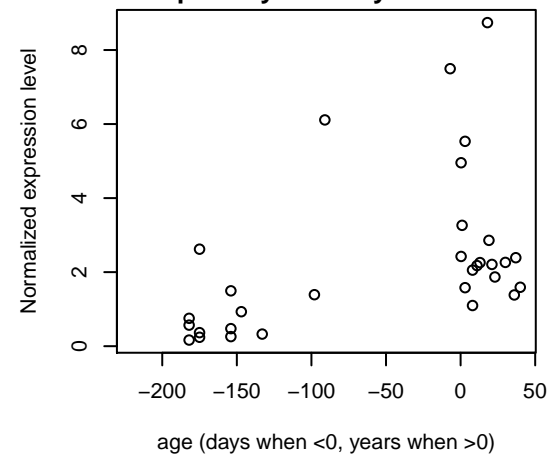

**LMCD1\_8590253\_8590589**  
(P=0.1044, Diff = -1.28)  
primary auditory cortex

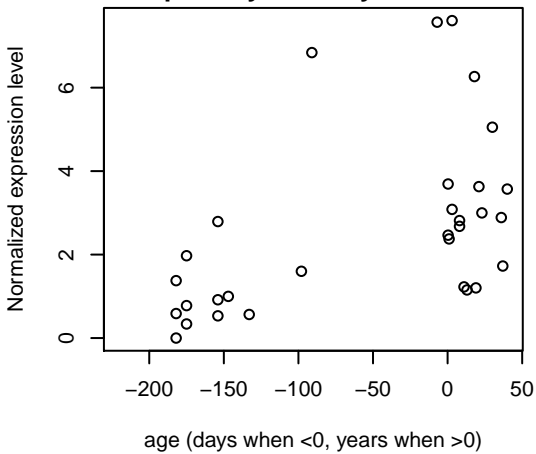

**LMCD1\_8591559\_8592135**  
(P=0.2265, Diff = -0.05)  
primary auditory cortex

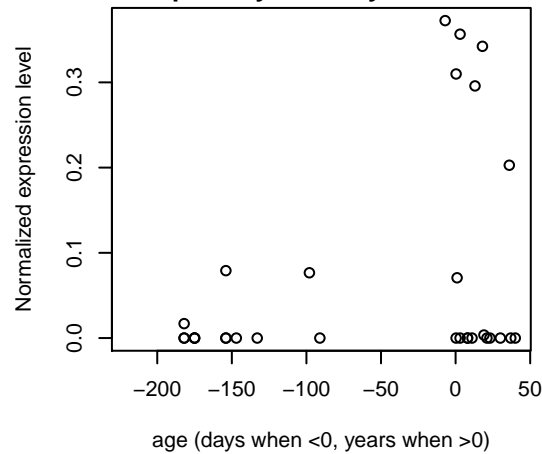

**LMCD1\_8607117\_8607333**  
(P=0.0829, Diff = -1)  
primary auditory cortex

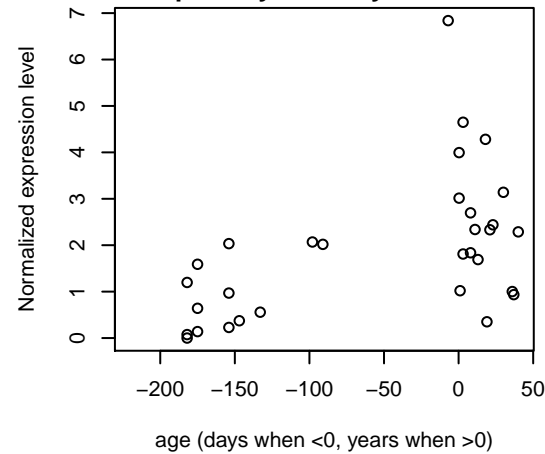

**LMCD1\_8609125\_8609805**  
(P=0.047, Diff = -2.02)  
primary auditory cortex

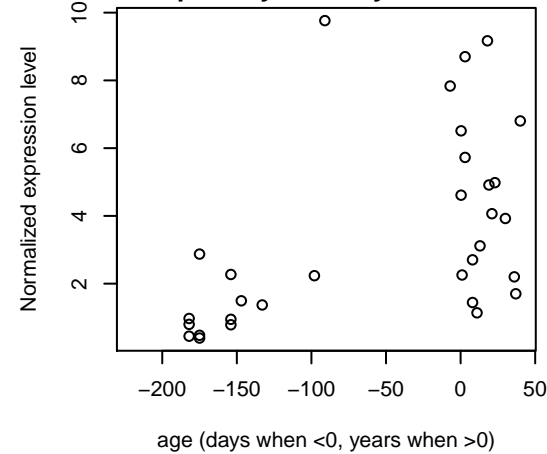



**WVOX\_78133550\_78133782**  
(P=0.1443, Diff = -1.34)  
primary auditory cortex

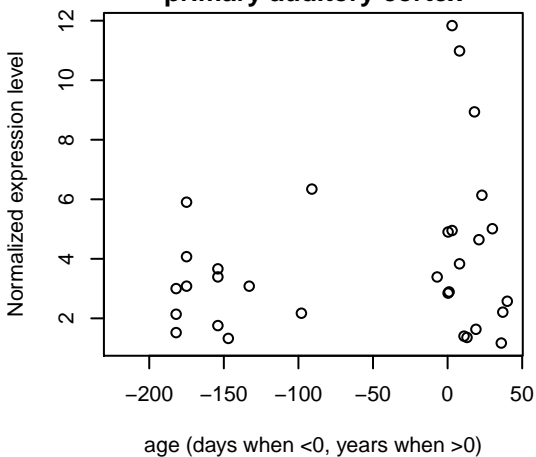

**WVOX\_78142319\_78142384**  
(P=0.0836, Diff = -1.76)  
primary auditory cortex

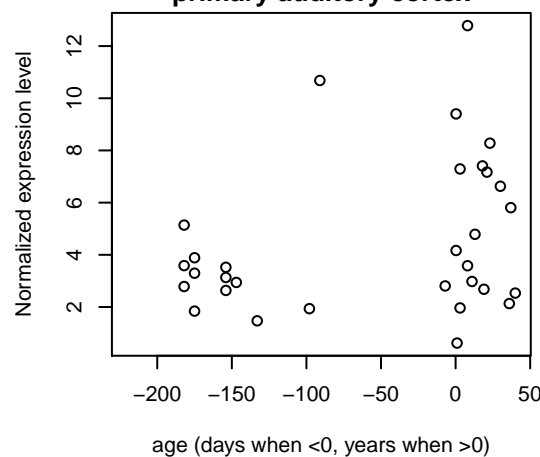

**WVOX\_78143674\_78143732**  
(P=0.1322, Diff = -2.16)  
primary auditory cortex

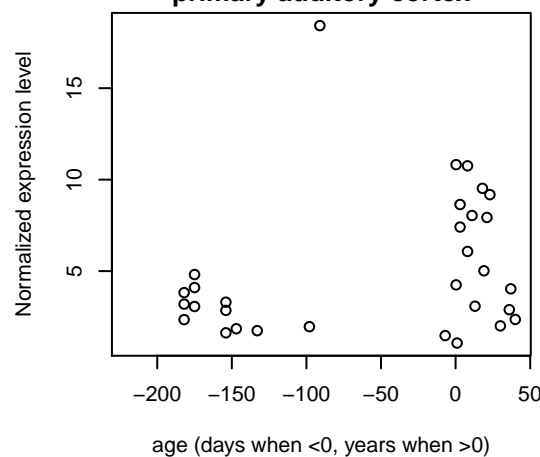

**WVOX\_78148872\_78149051**  
(P=0.0714, Diff = -1.43)  
primary auditory cortex

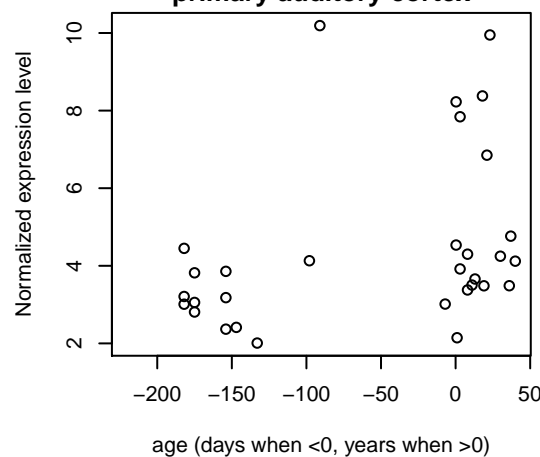

**WVOX\_78198079\_78198186**  
(P=0.0559, Diff = -1.47)  
primary auditory cortex

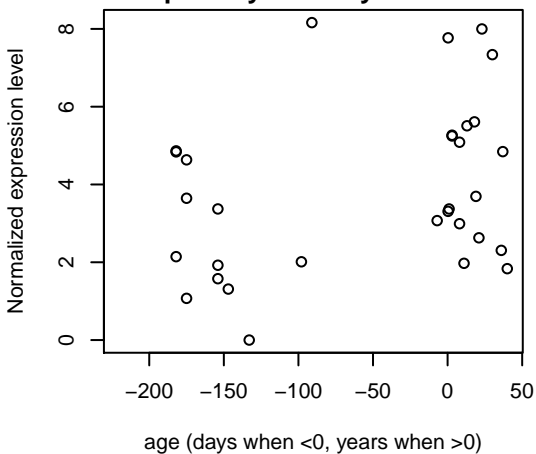

**WVOX\_78312499\_78312593**  
(P=0.3322, Diff = -0.04)  
primary auditory cortex

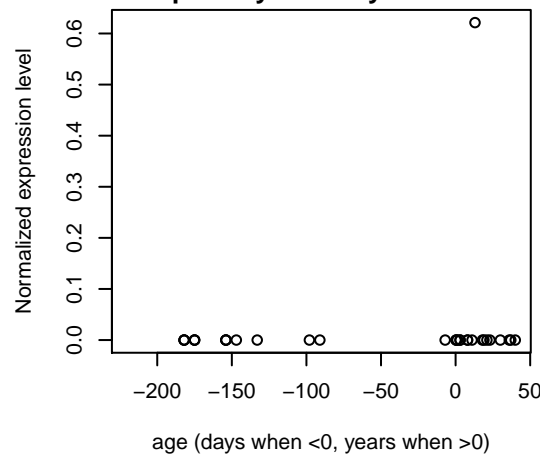

**WVOX\_78420756\_78420845**  
(P=0.0209, Diff = -2.76)  
primary auditory cortex

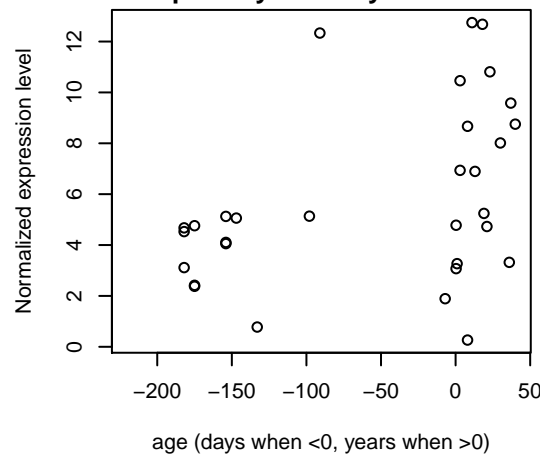

**WVOX\_78458766\_78458952**  
(P=3e-04, Diff = -3.36)  
primary auditory cortex

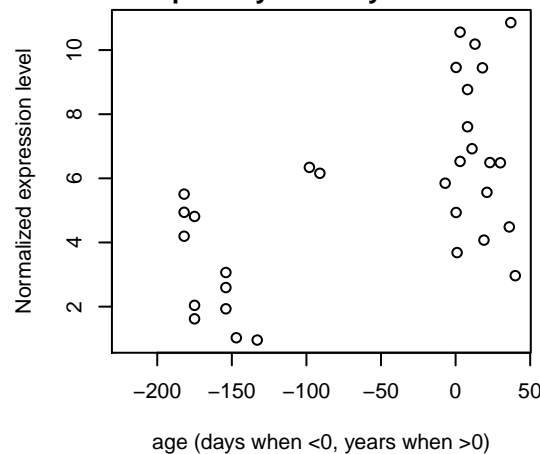

**WVOX\_78466384\_78466649**  
(P=1e-04, Diff = -2.69)  
primary auditory cortex

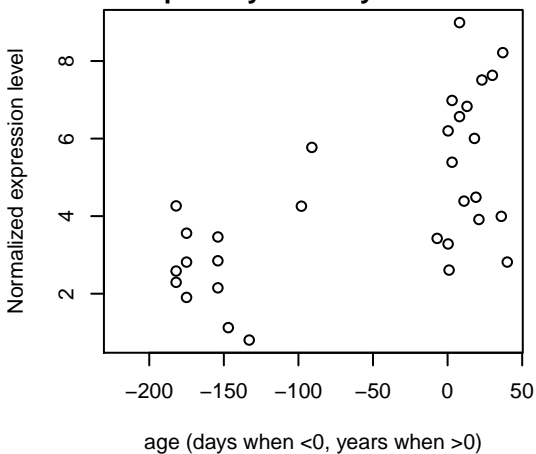

**WVOX\_78790836\_78790912**  
(P=0.8716, Diff = 0.01)  
primary auditory cortex

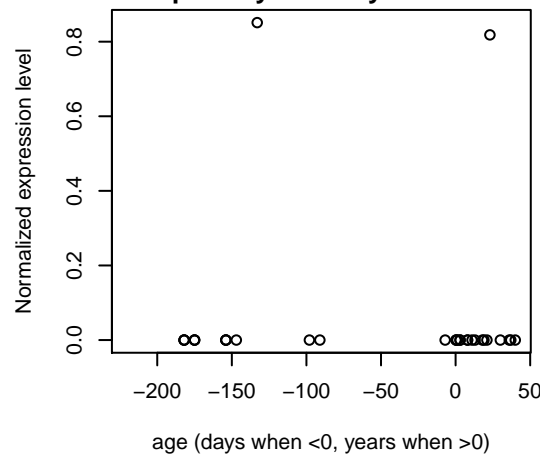

**WVOX\_79245504\_79246031**  
(P=0.0017, Diff = -3.02)  
primary auditory cortex

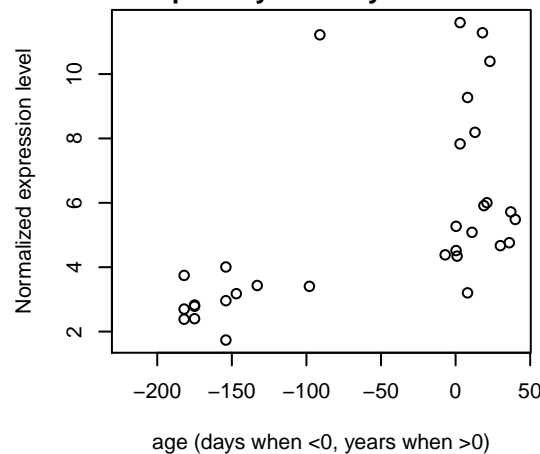

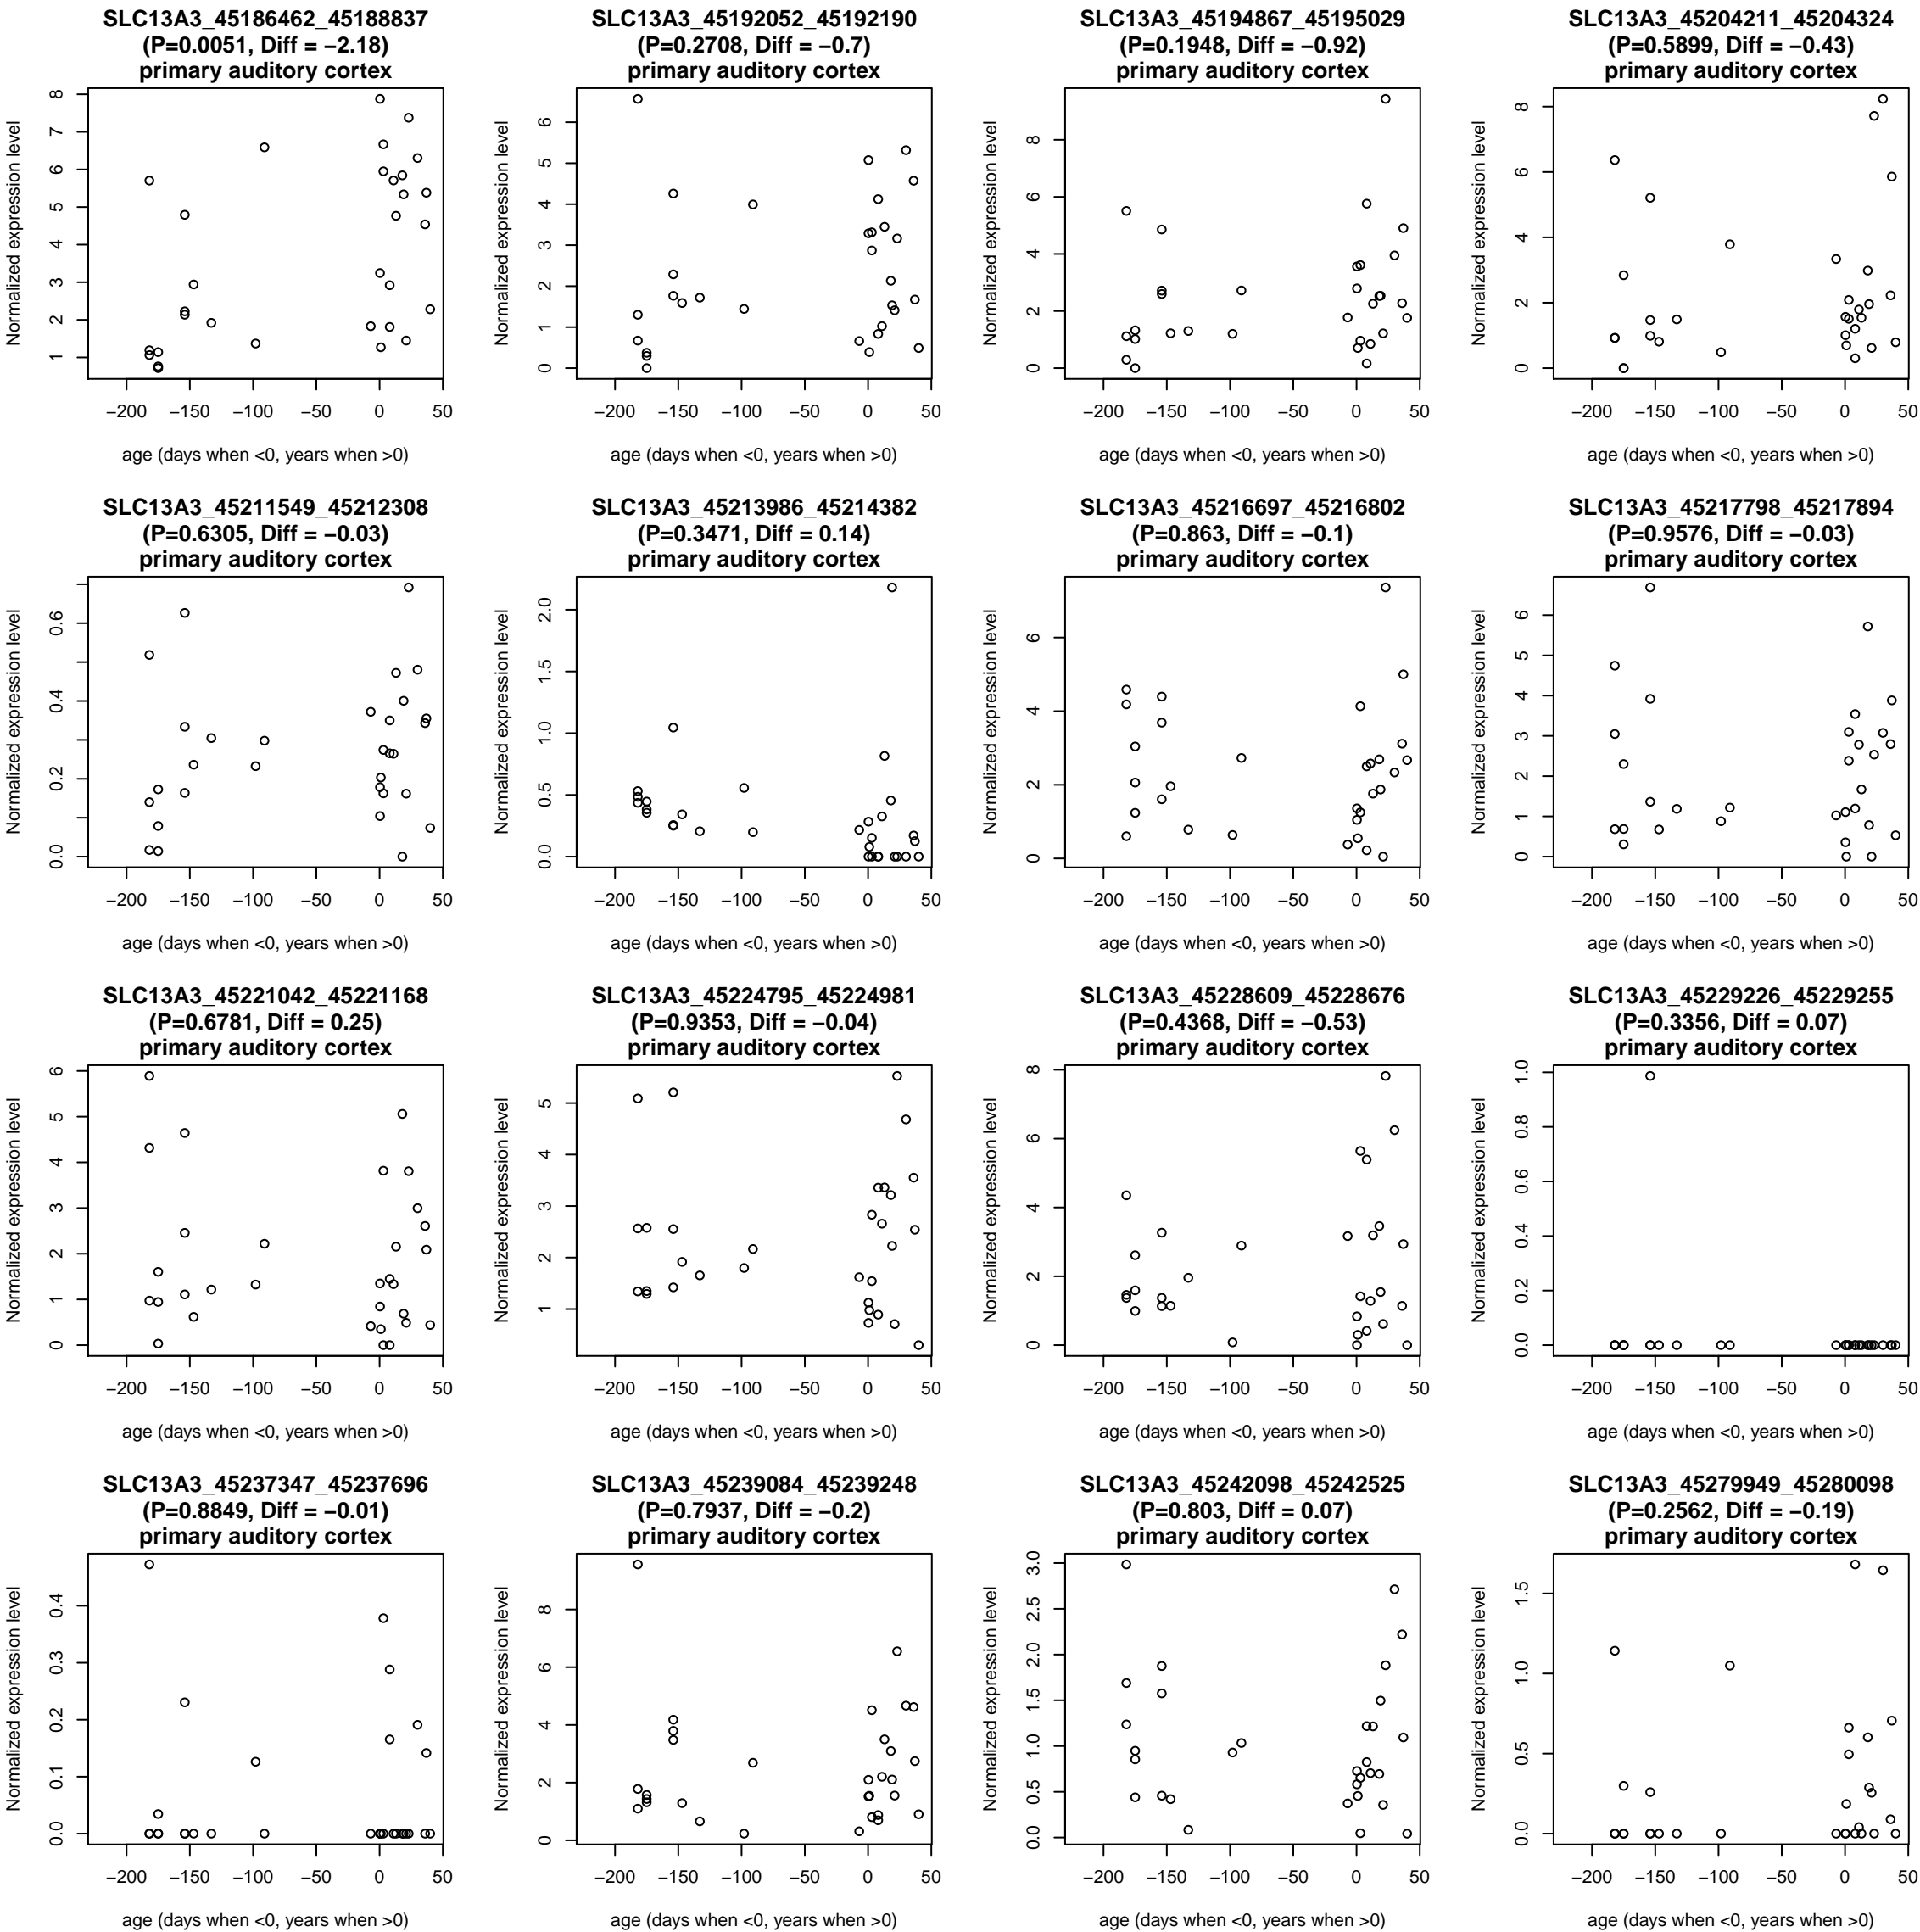

**SLC13A3\_45298681\_45298778**  
(P=0.0664, Diff = 0.54)  
primary auditory cortex

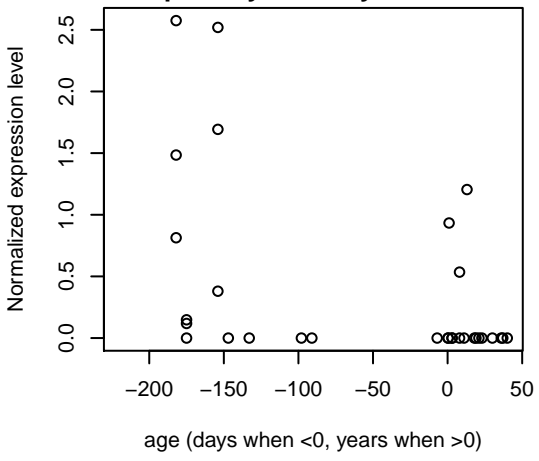

**SLC13A3\_45302302\_45302417**  
(P=0.6425, Diff = -0.08)  
primary auditory cortex

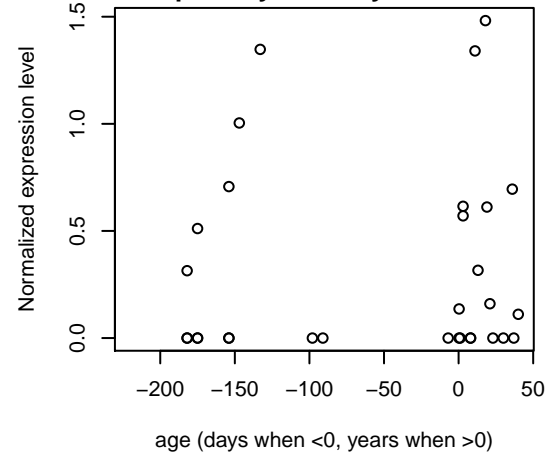

**SLC13A3\_45304585\_45304714**  
(P=0.142, Diff = -0.17)  
primary auditory cortex

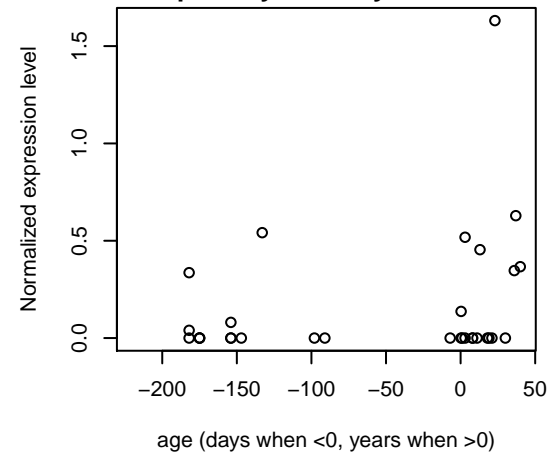

**HTR1B\_78171947\_78173490**  
**(P=0.0062, Diff = -0.53)**  
**primary auditory cortex**

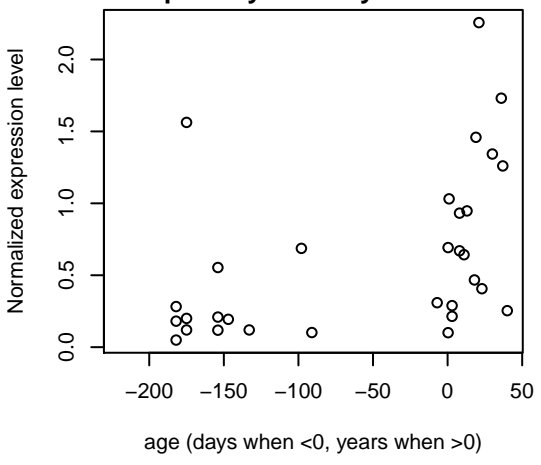

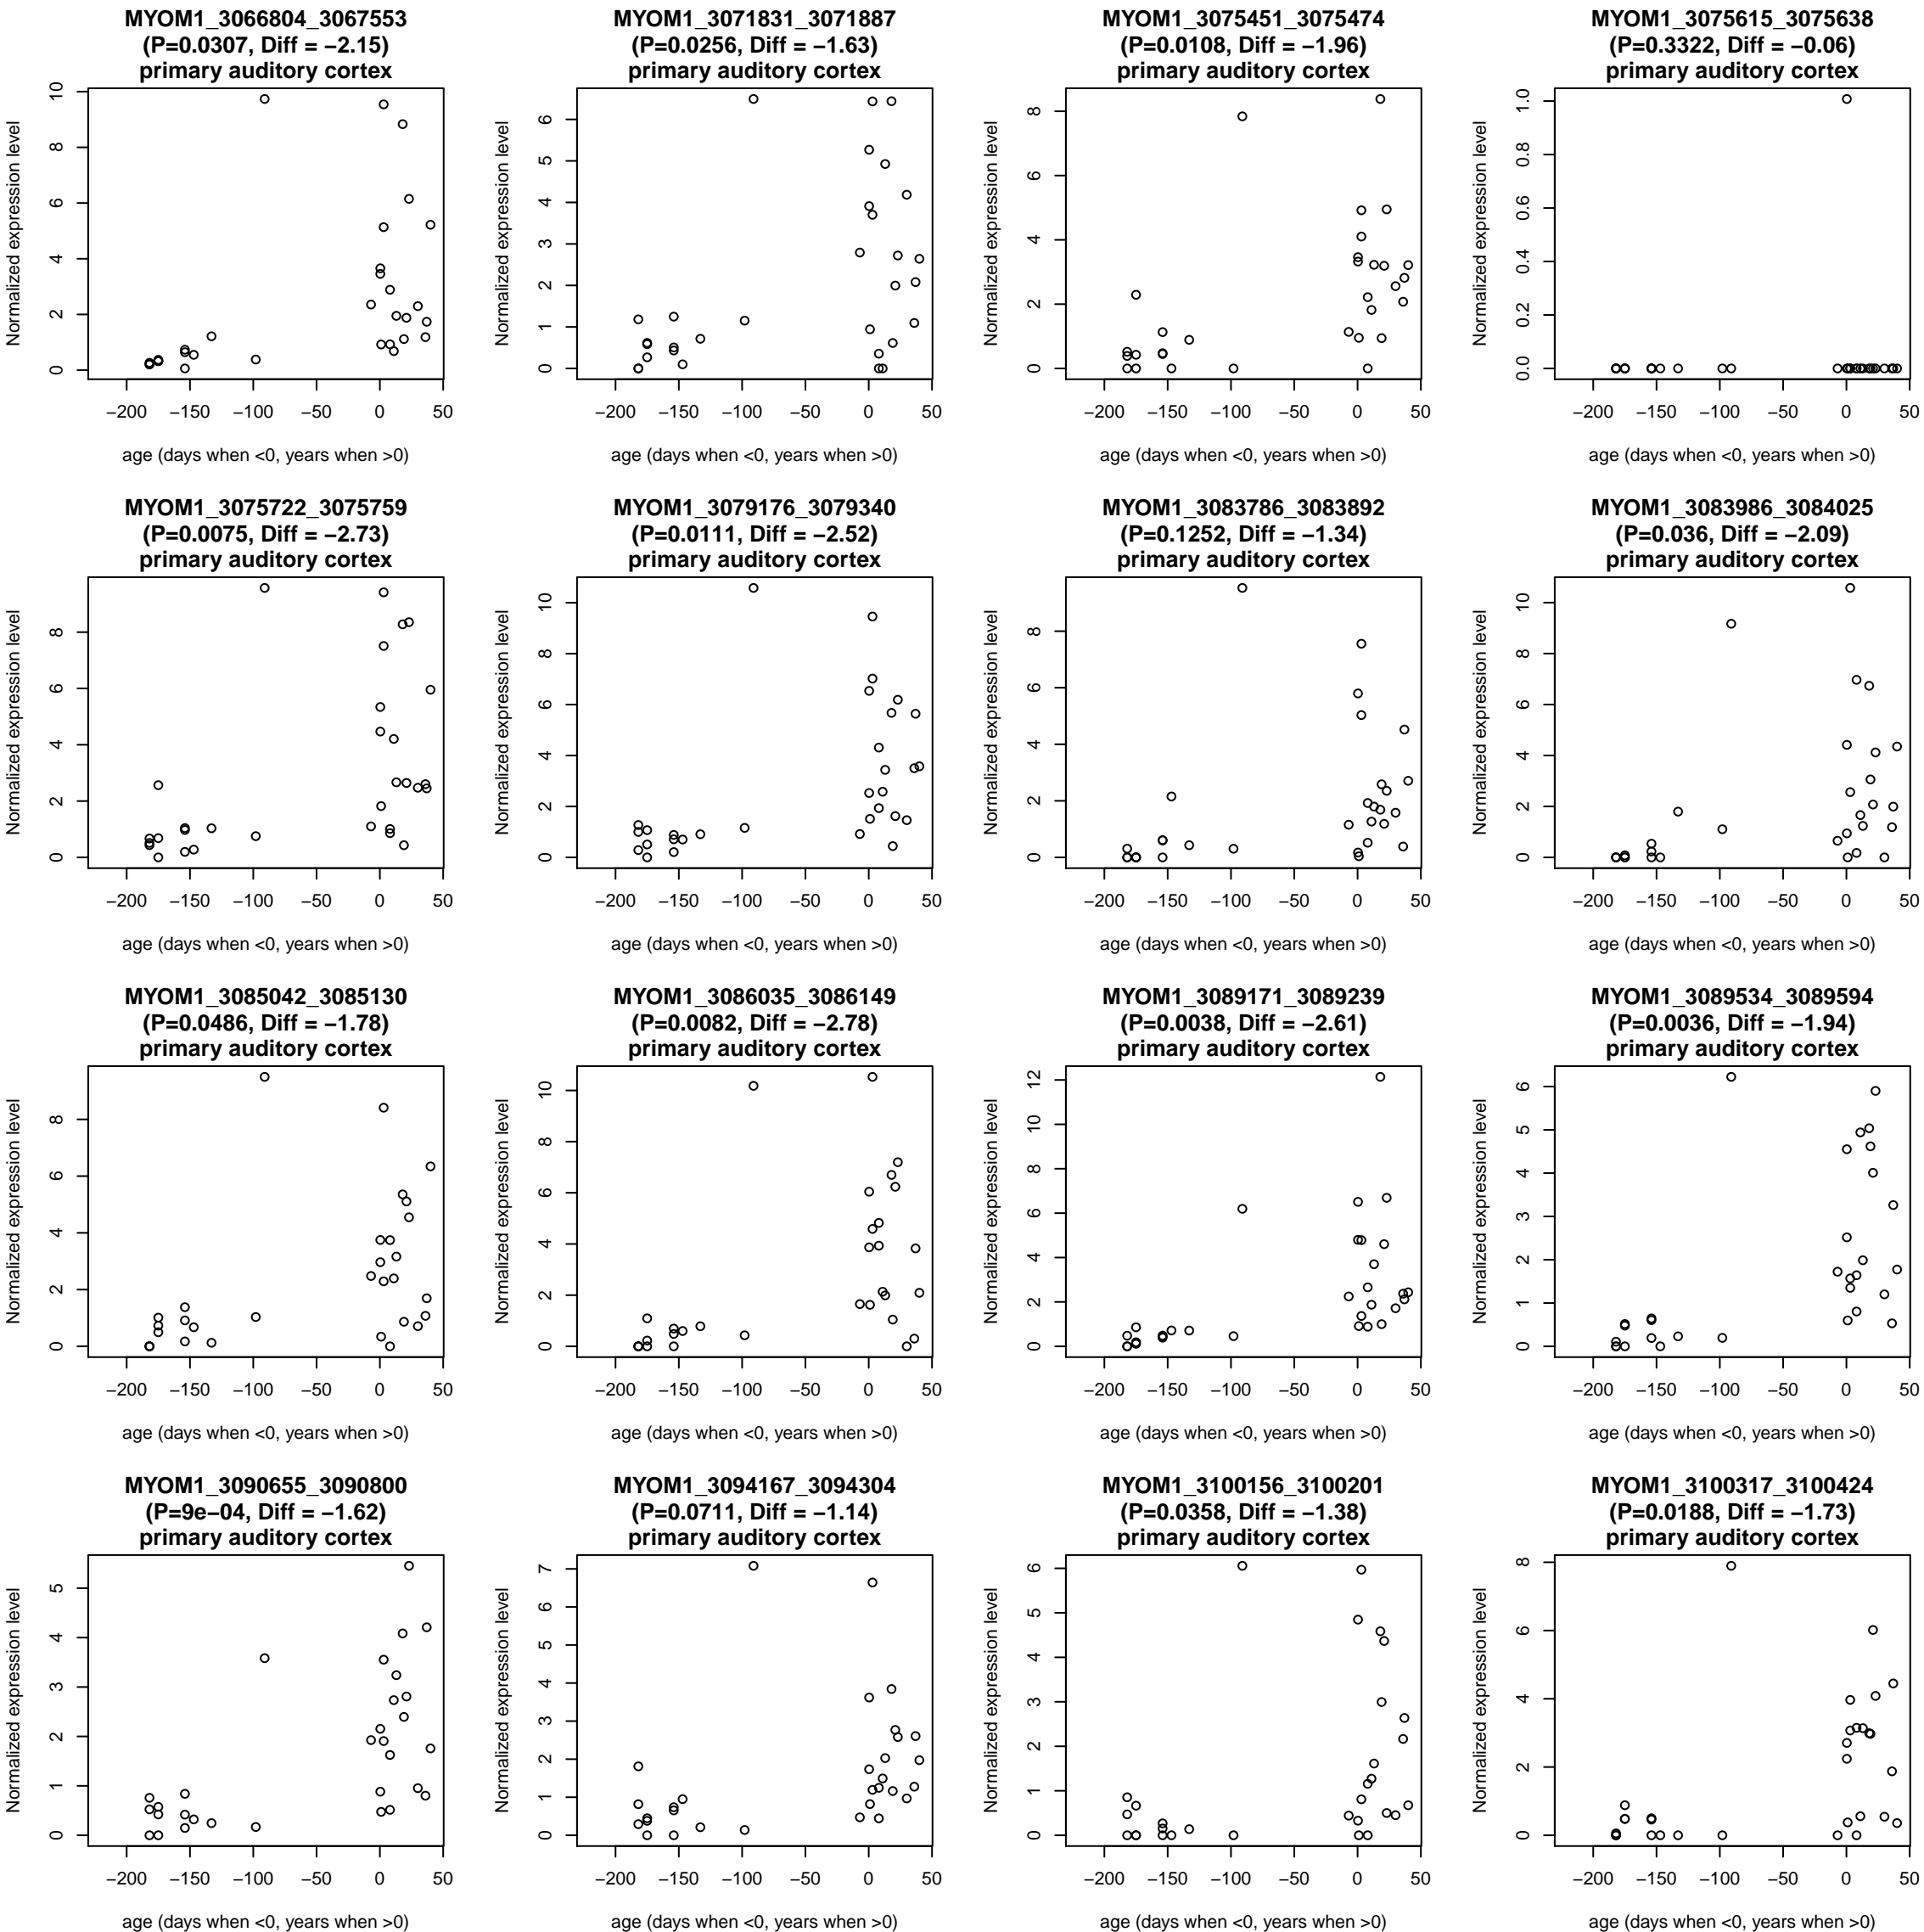

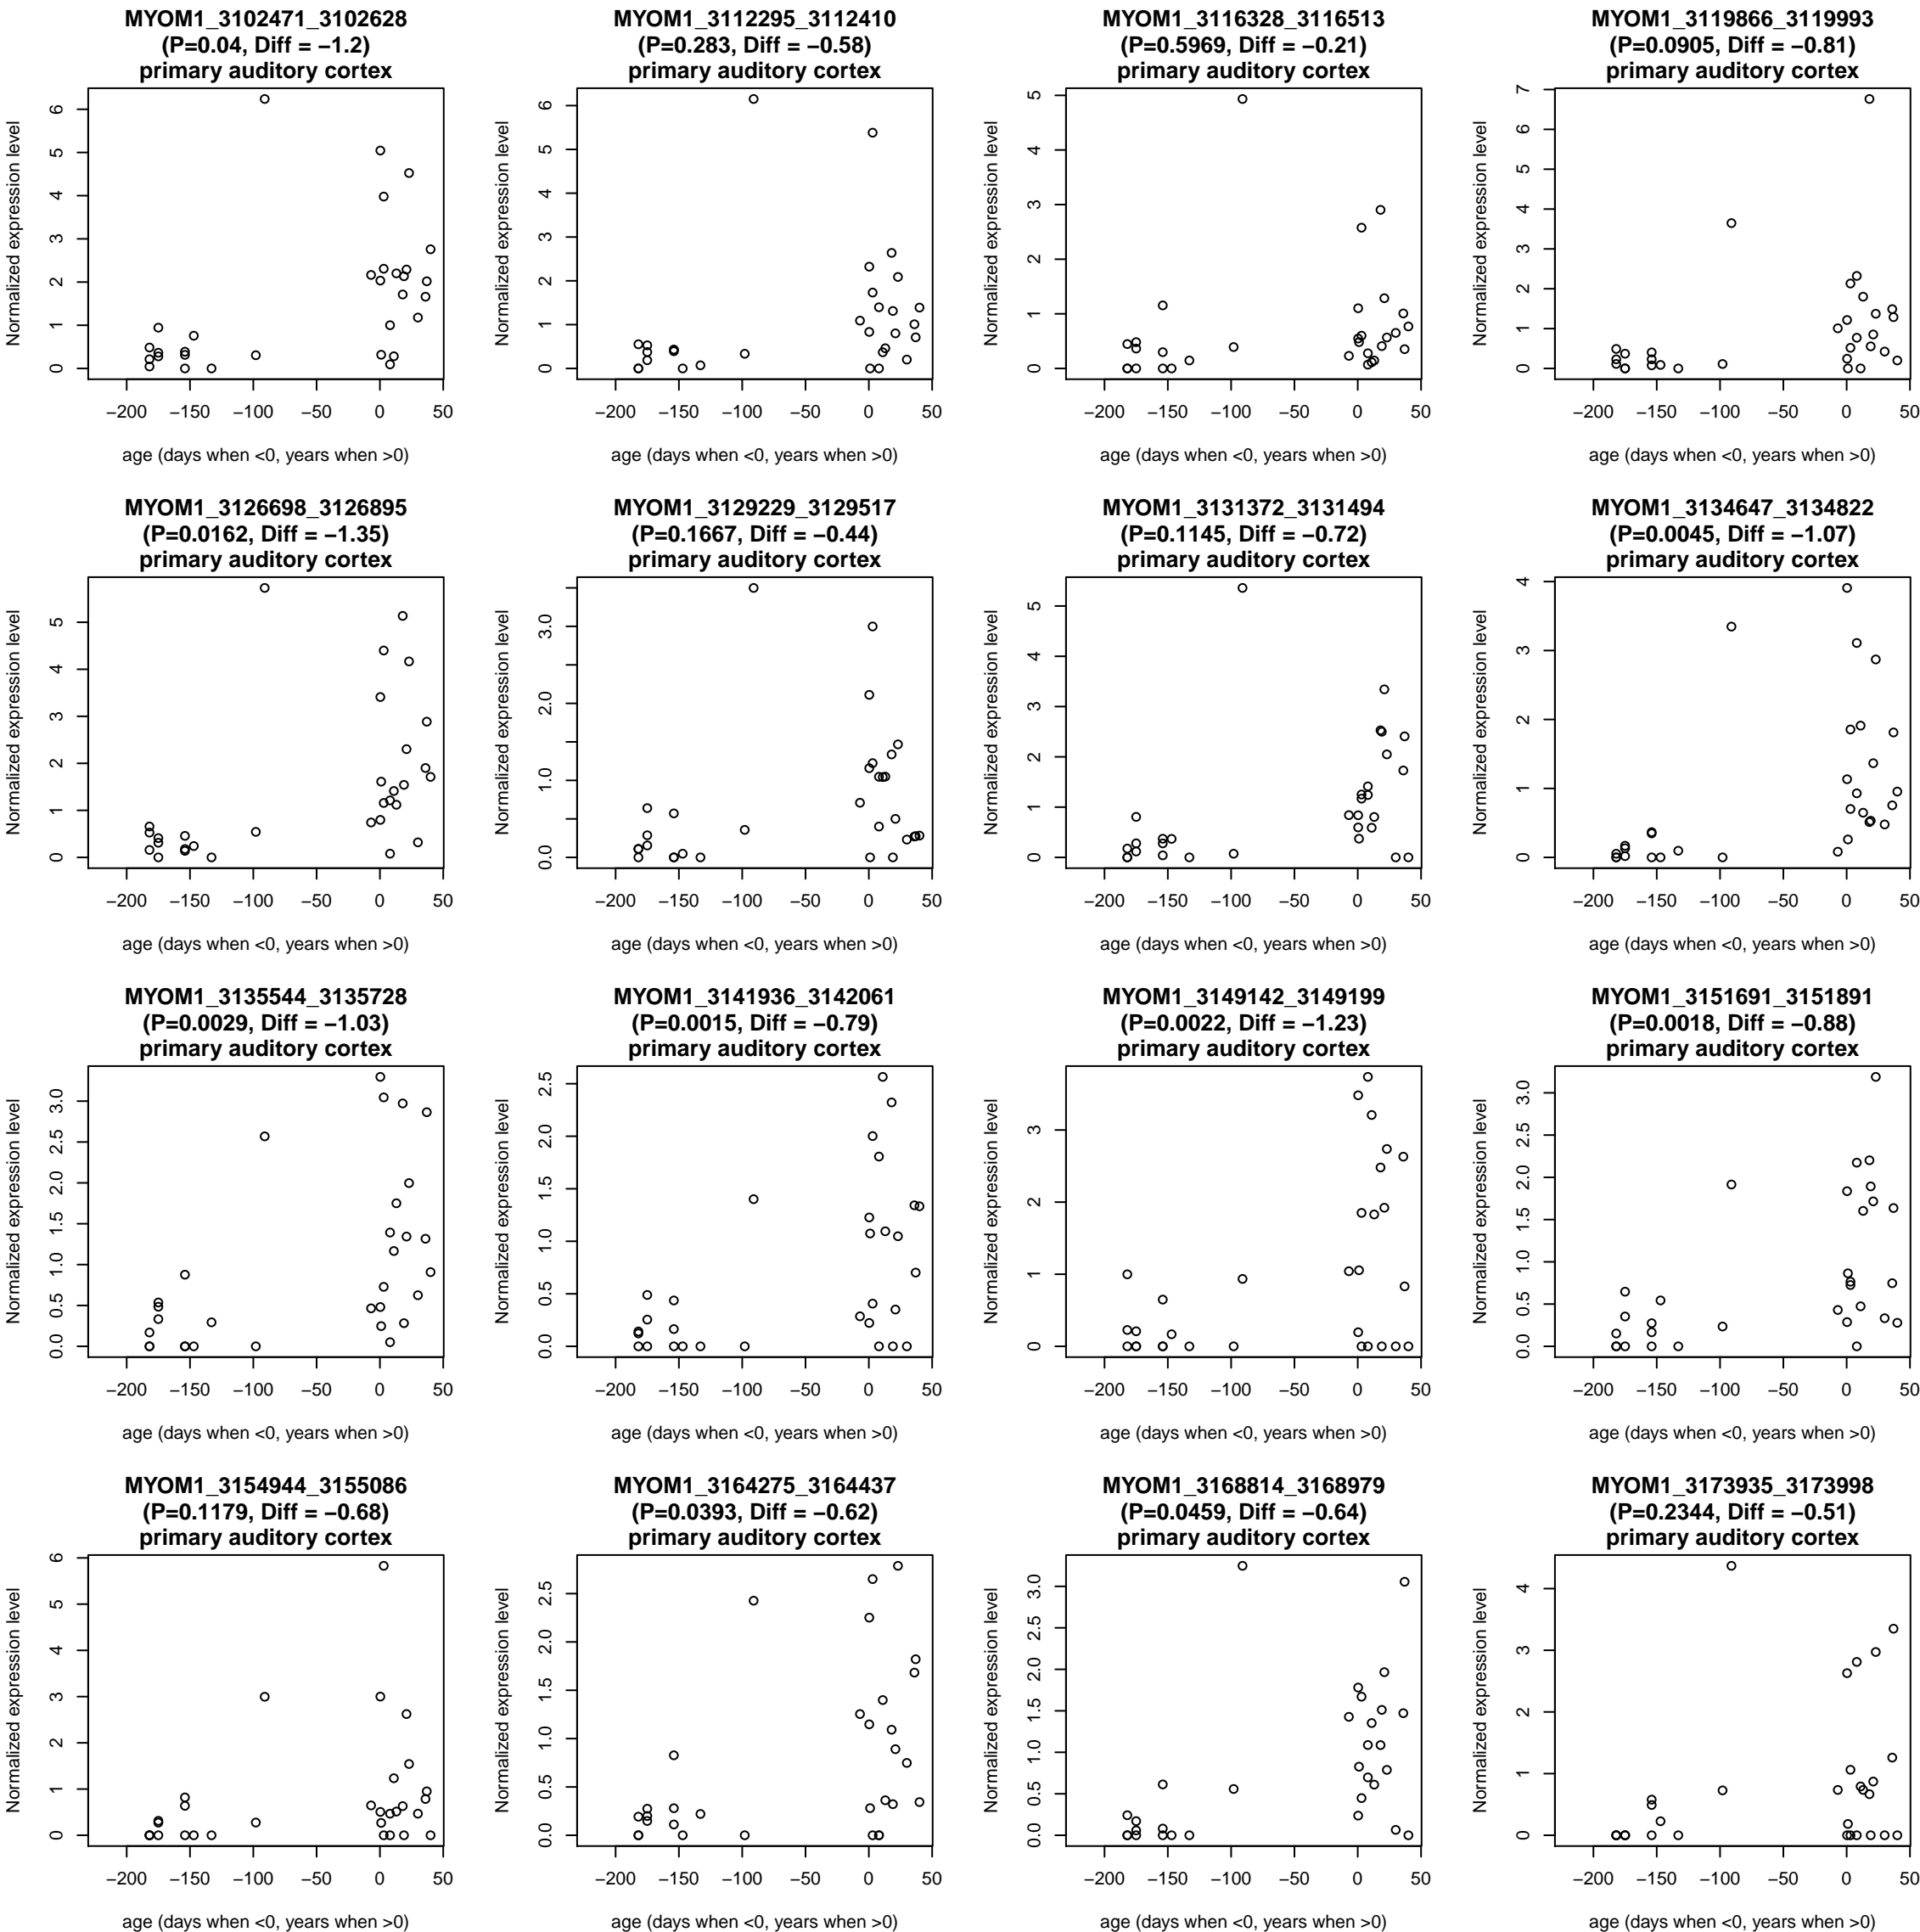

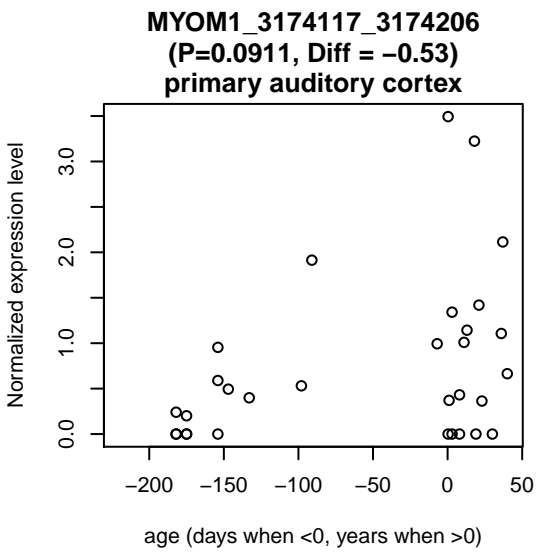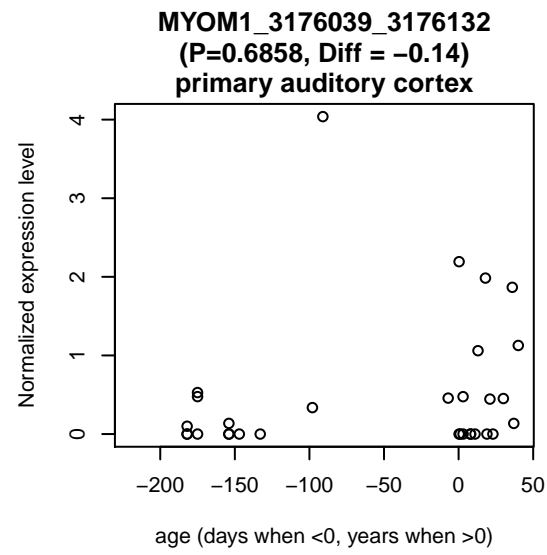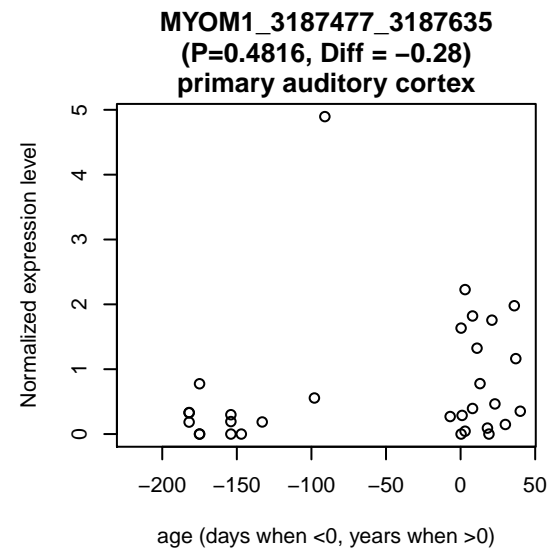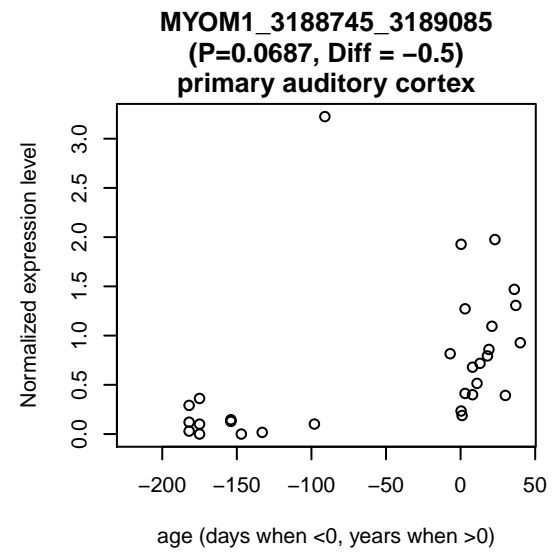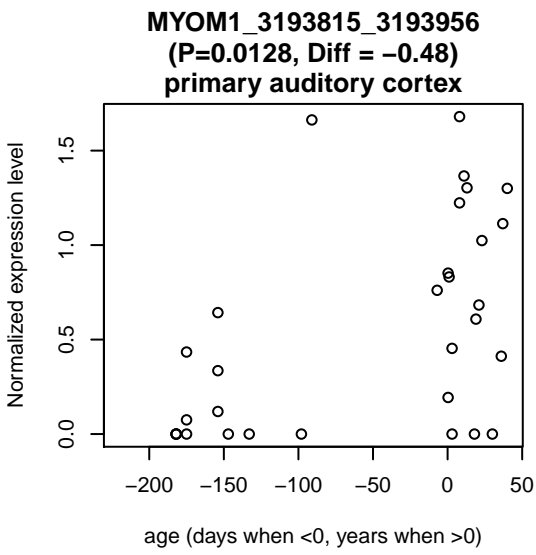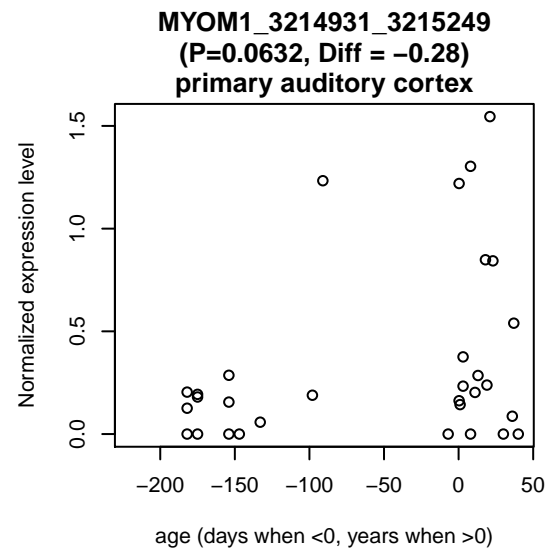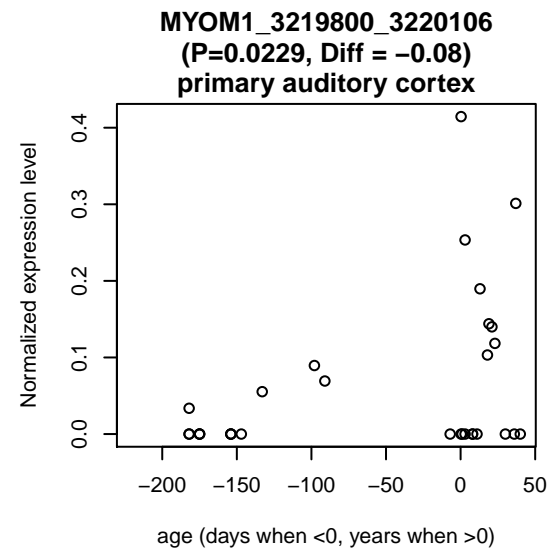

**USP44\_95910335\_95912129**  
(P=0.6615, Diff = -0.03)  
primary auditory cortex

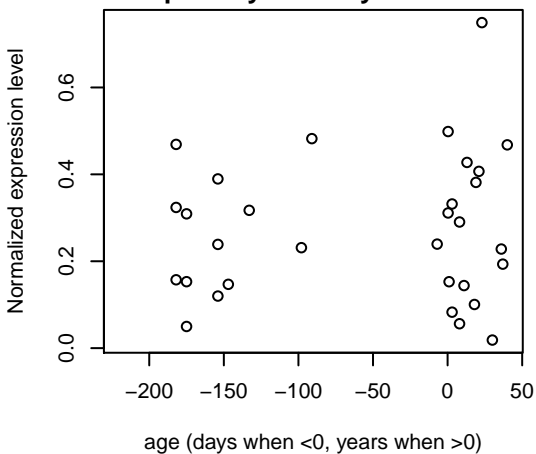

**USP44\_95914772\_95914978**  
(P=0.0827, Diff = 0.11)  
primary auditory cortex

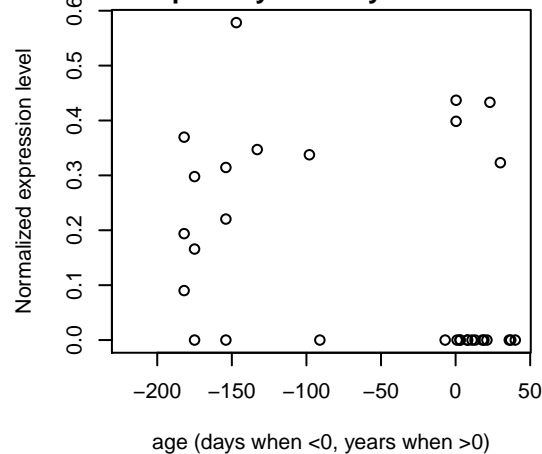

**USP44\_95918295\_95918564**  
(P=0.198, Diff = -0.09)  
primary auditory cortex

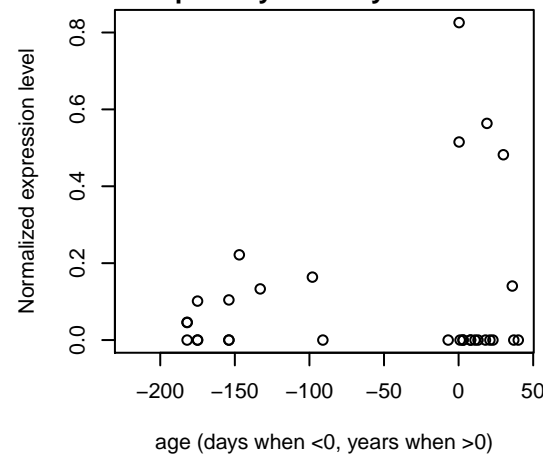

**USP44\_95922582\_95922778**  
(P=0.124, Diff = 0.13)  
primary auditory cortex

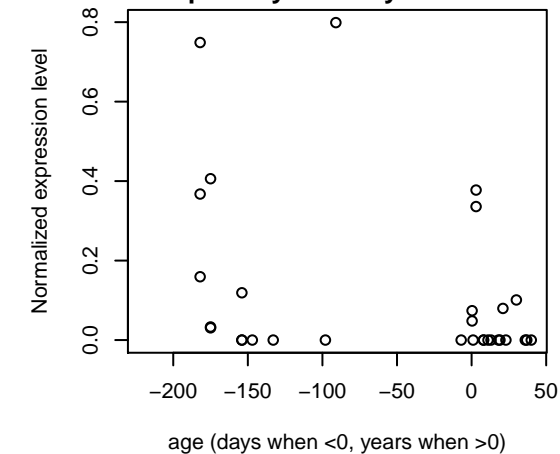

**USP44\_95926604\_95928102**  
(P=0.6615, Diff = 0.03)  
primary auditory cortex

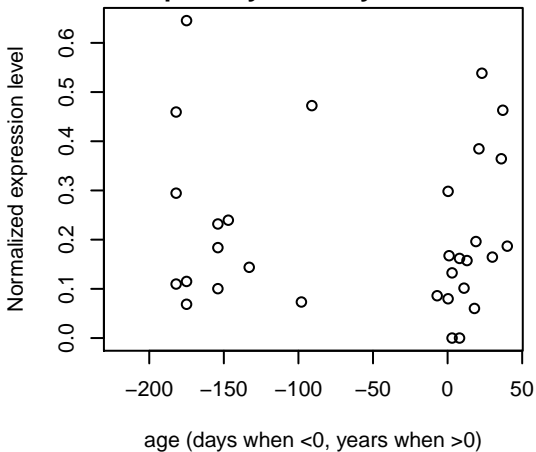

**USP44\_95929148\_95929202**  
(P=0.8452, Diff = -0.01)  
primary auditory cortex

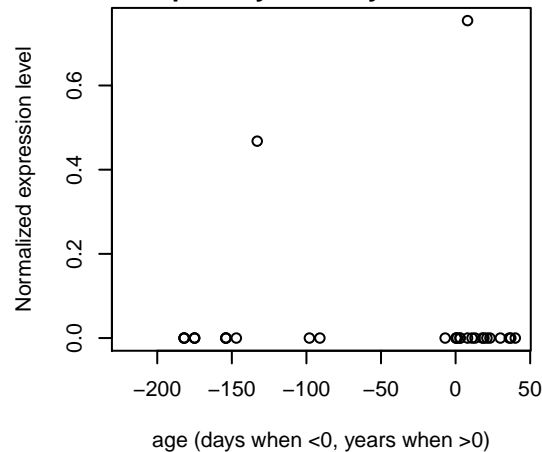

**USP44\_95940225\_95940766**  
(P=0.0323, Diff = -0.13)  
primary auditory cortex

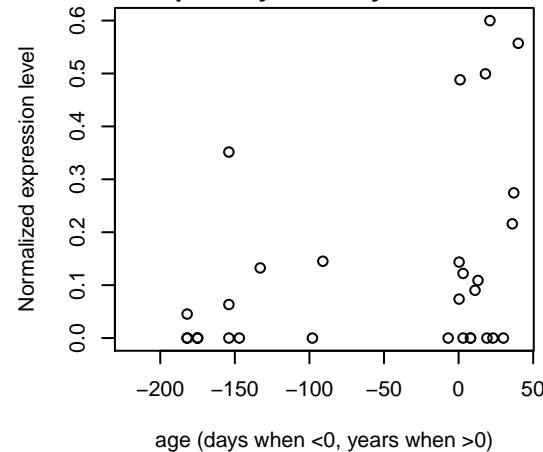

**USP44\_95941758\_95942048**  
(P=0.1544, Diff = 0.04)  
primary auditory cortex

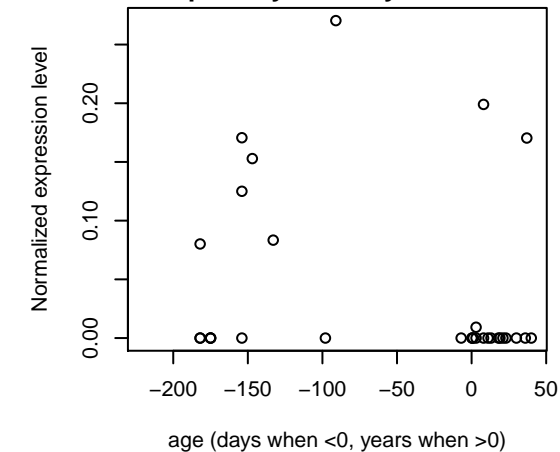

**USP44\_95942301\_95942620**  
(P=0.9144, Diff = 0)  
primary auditory cortex

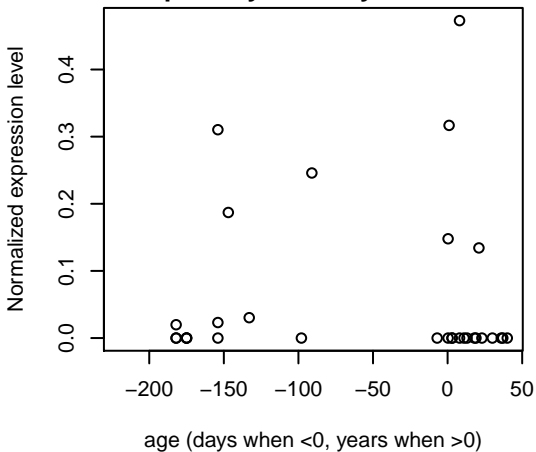

**USP44\_95945047\_95945266**  
(P=NaN, Diff = 0)  
primary auditory cortex

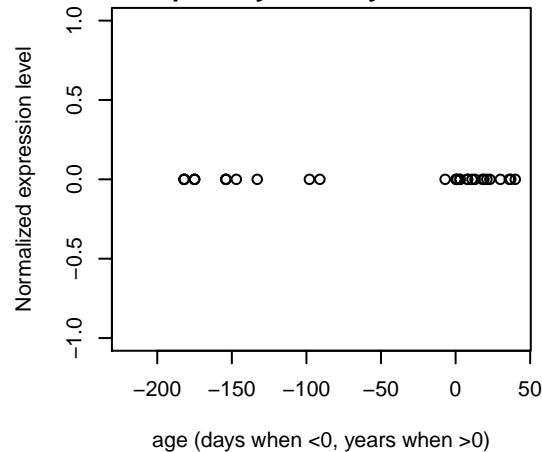



**IGFBP7\_57896938\_57897502**  
(P=0.1084, Diff = -22.92)  
primary auditory cortex

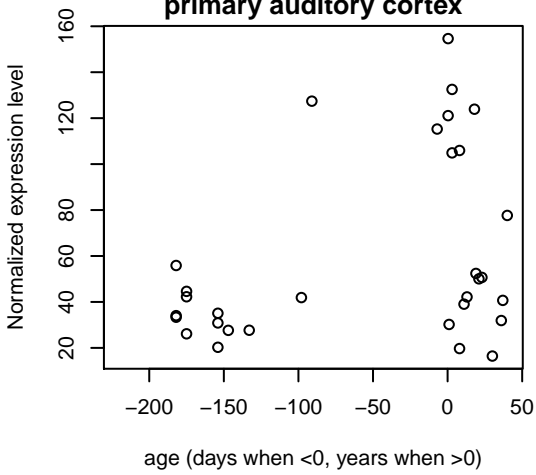

**IGFBP7\_57898203\_57898718**  
(P=0.0483, Diff = -33.84)  
primary auditory cortex

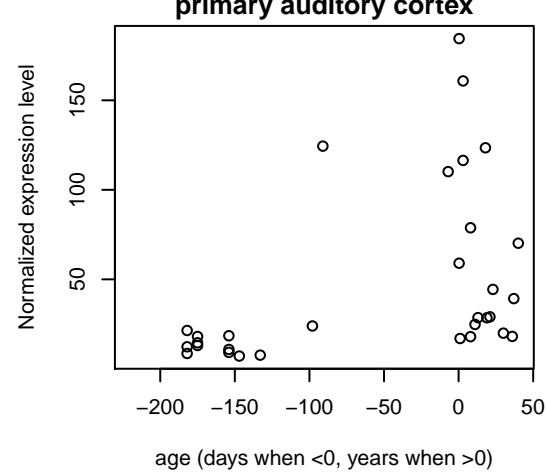

**IGFBP7\_57899360\_57899477**  
(P=0.0451, Diff = -121.52)  
primary auditory cortex

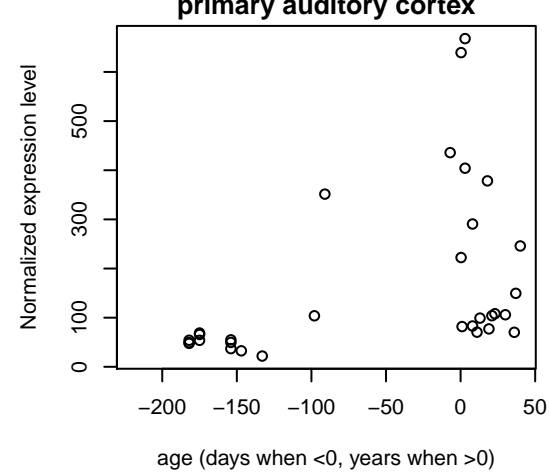

**IGFBP7\_57906989\_57907099**  
(P=0.0493, Diff = -107.03)  
primary auditory cortex

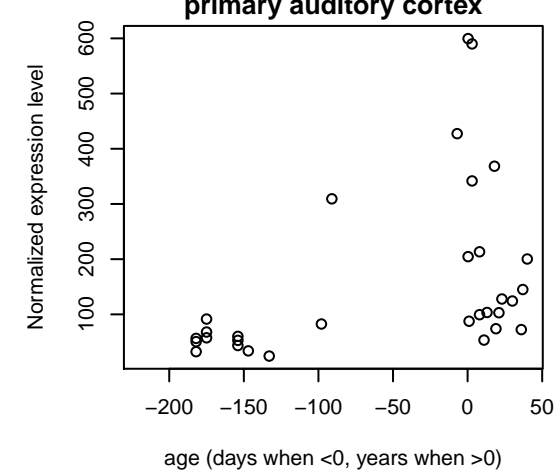

**IGFBP7\_57976042\_57976551**  
(P=0.2472, Diff = -15.36)  
primary auditory cortex

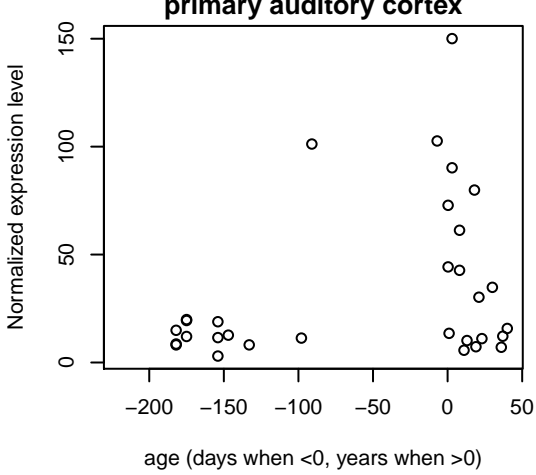

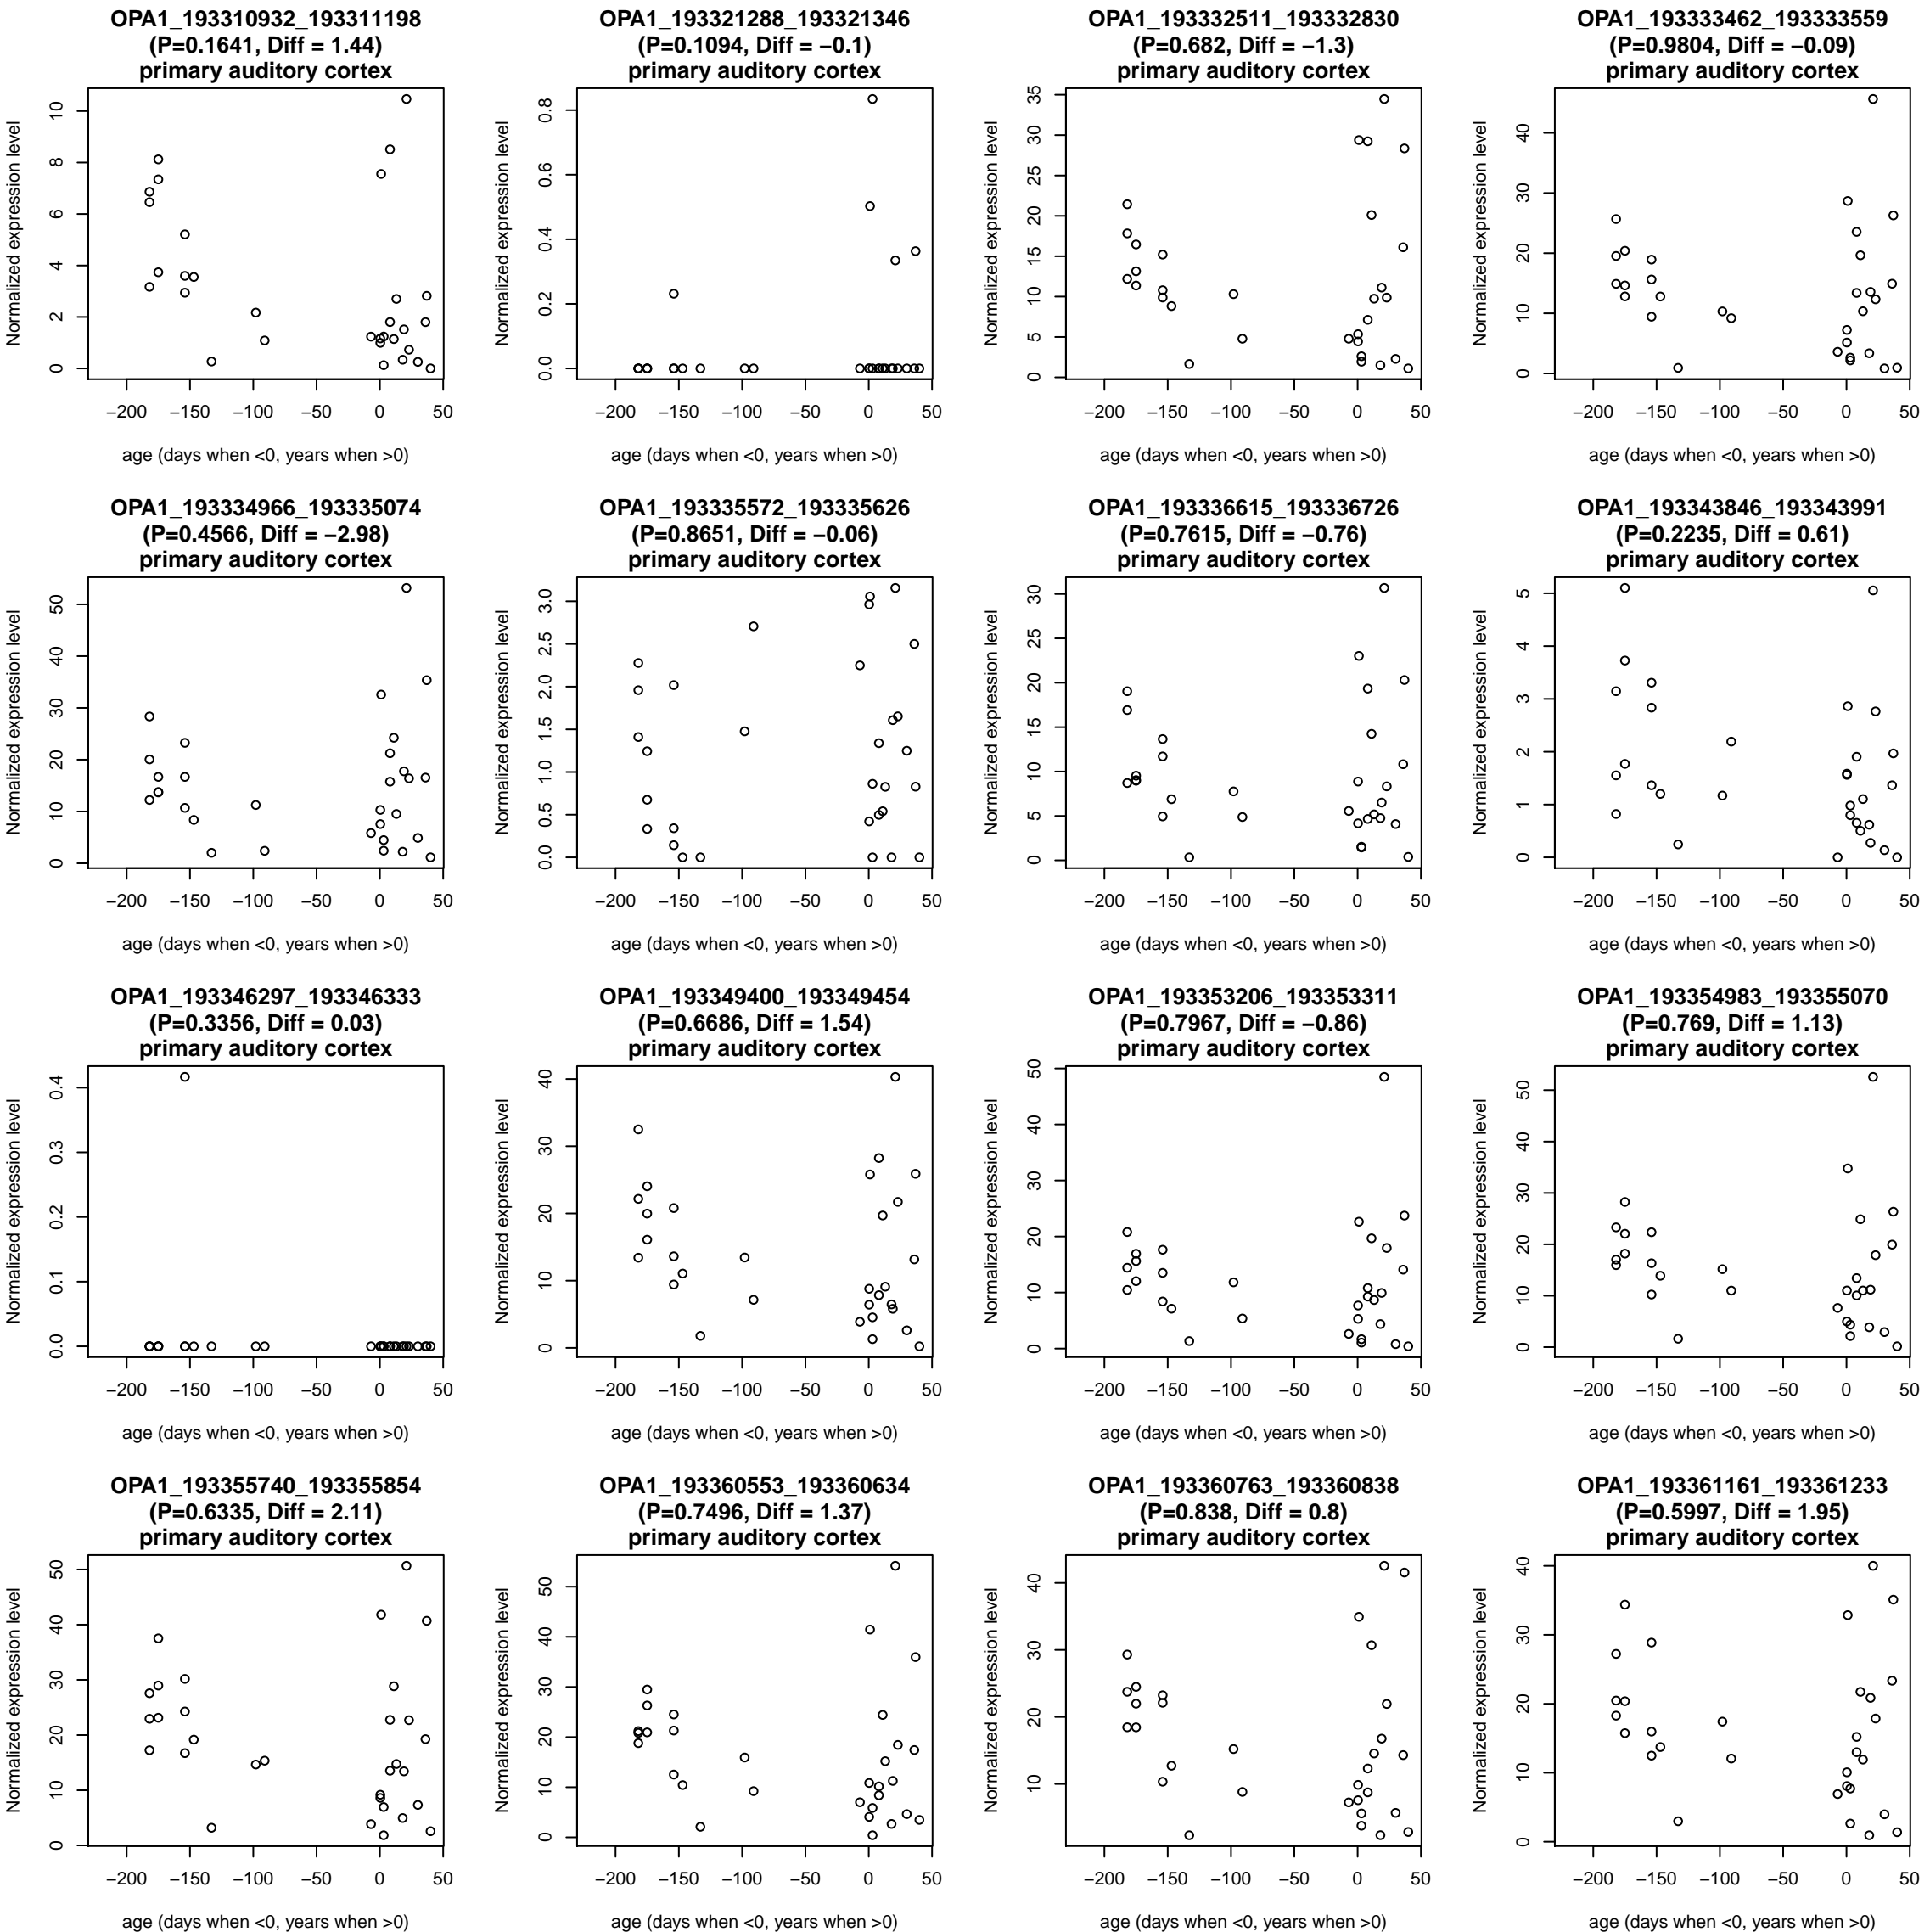

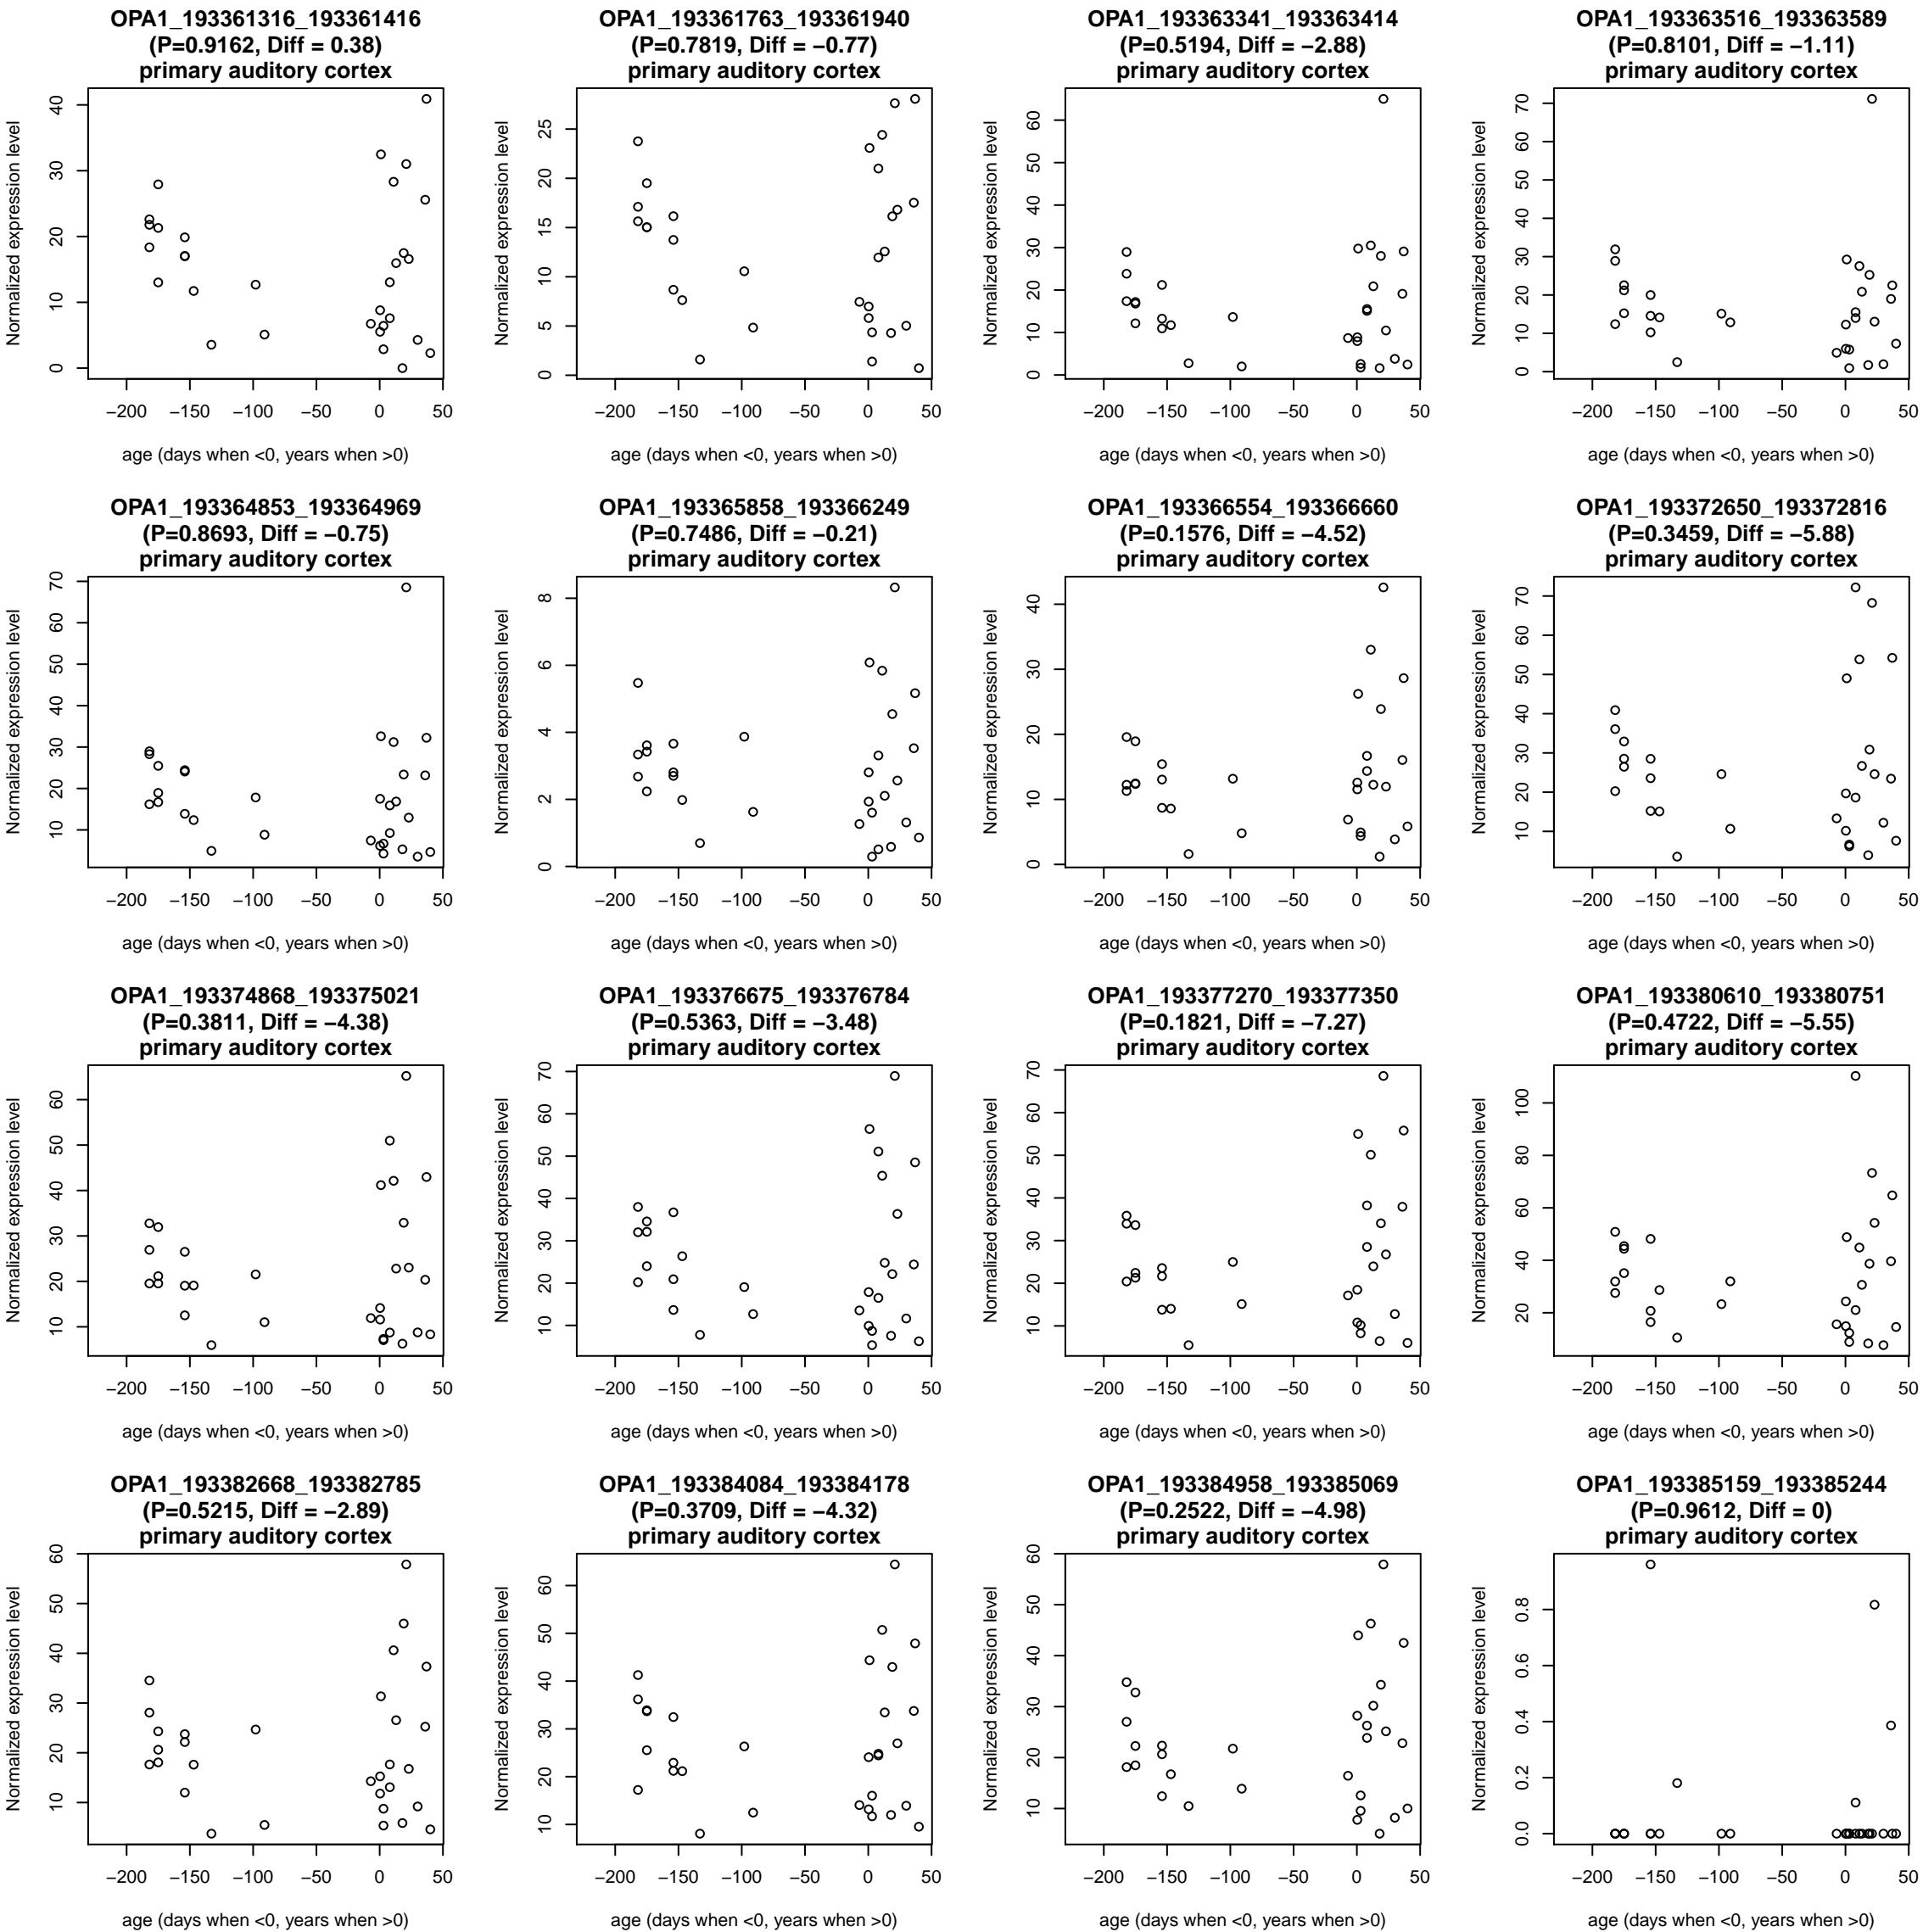

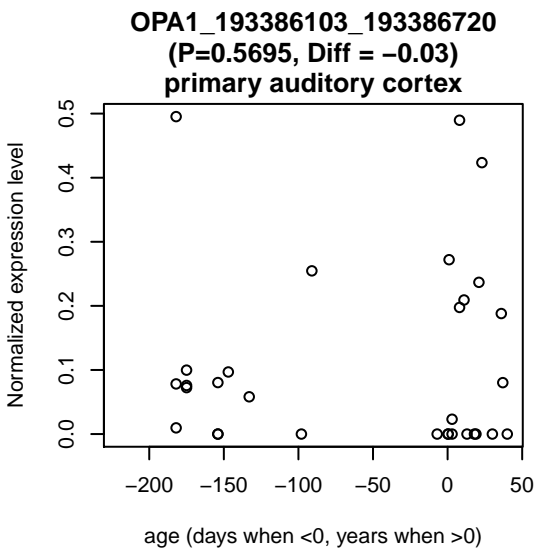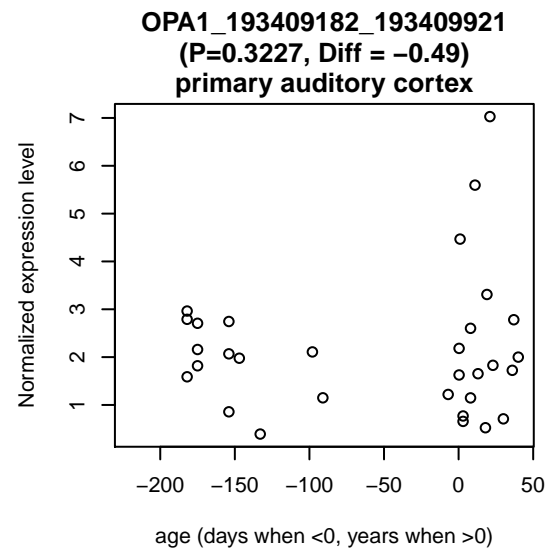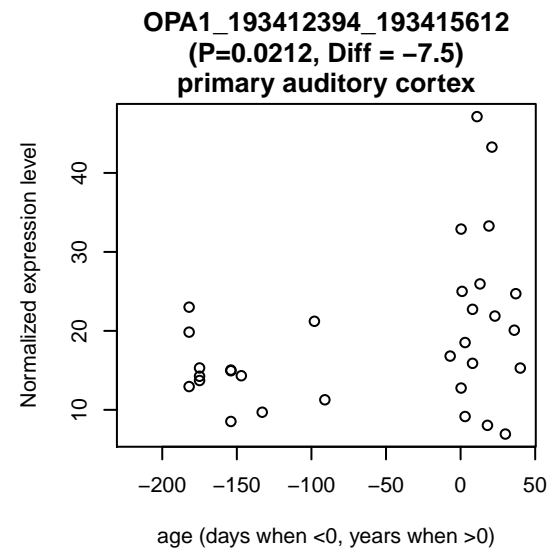

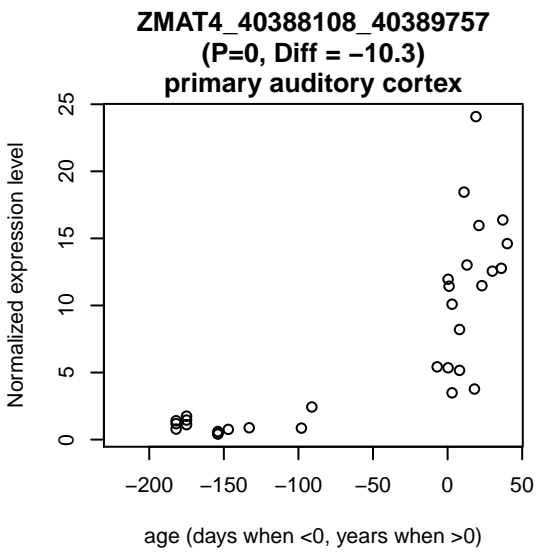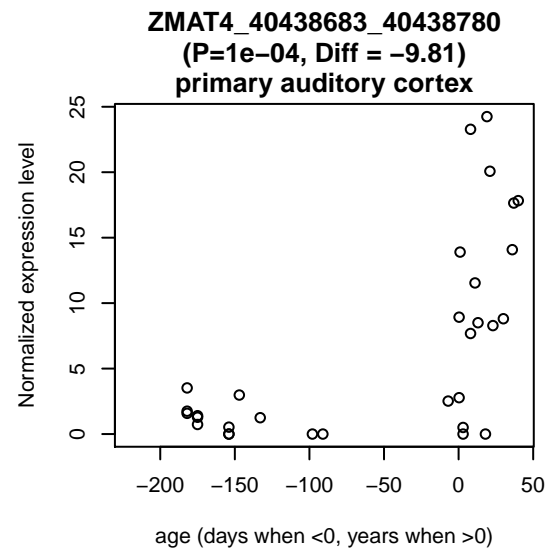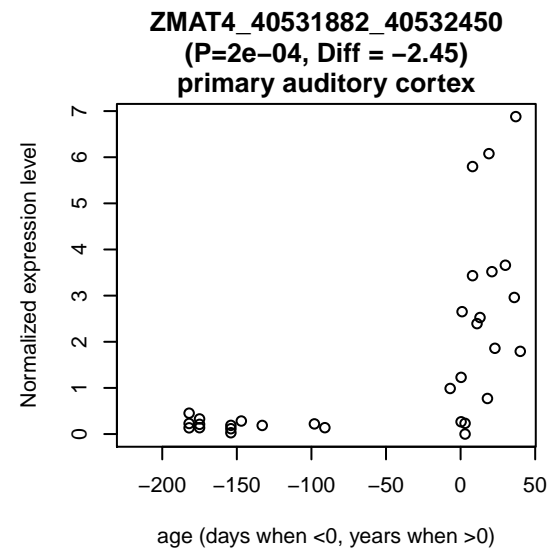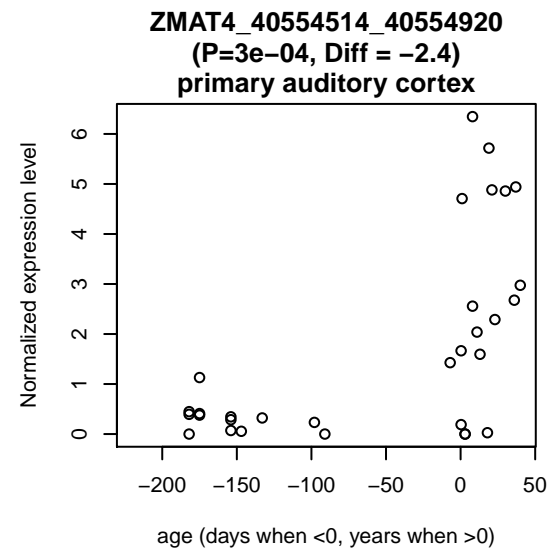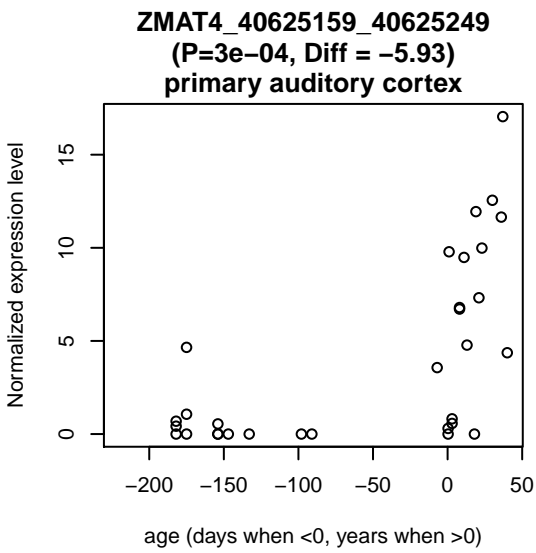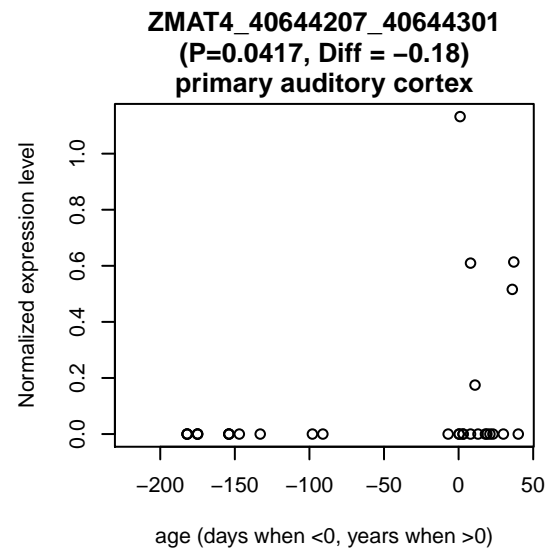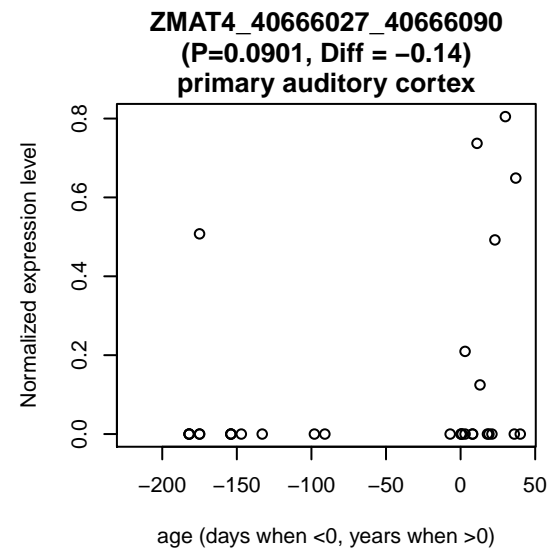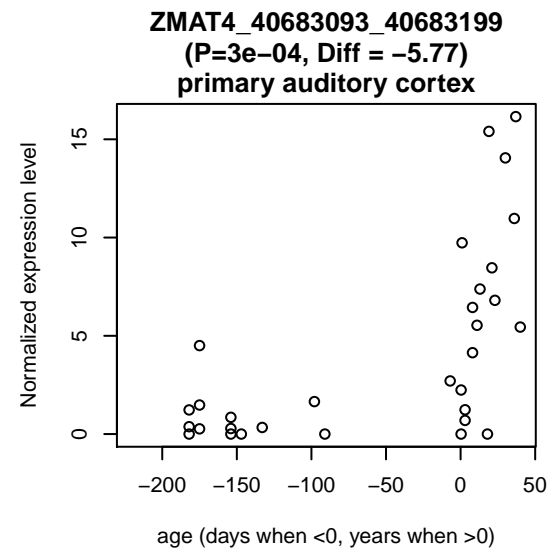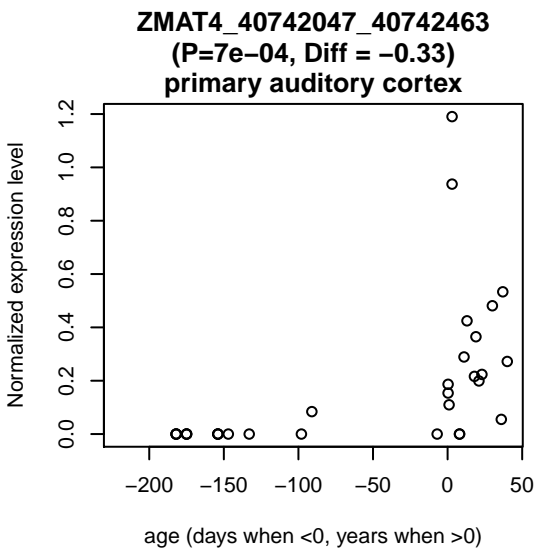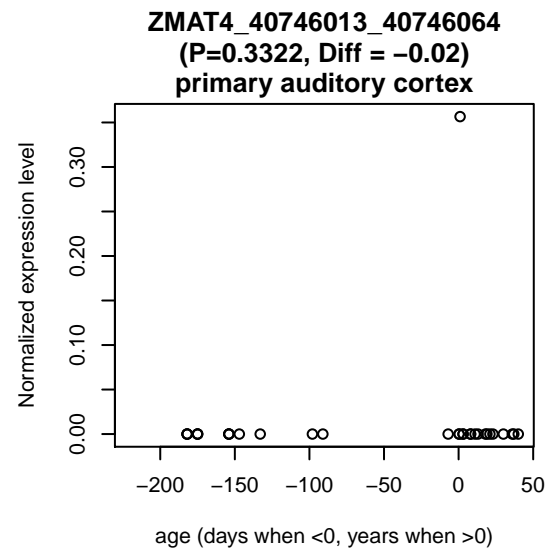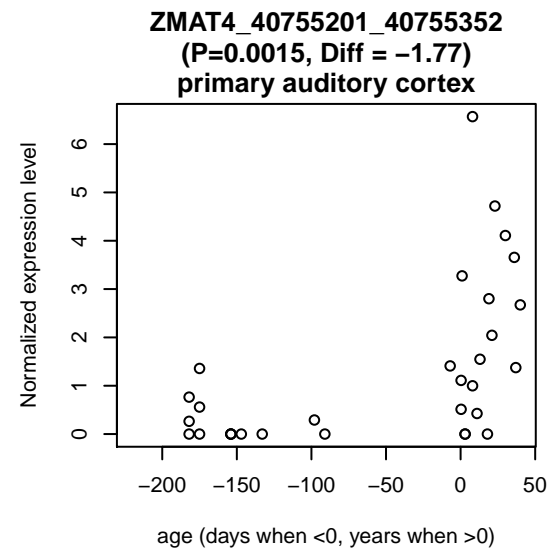

**CNDP1\_72201674\_72201926**  
( $P=3e-04$ , Diff =  $-8.62$ )  
primary auditory cortex

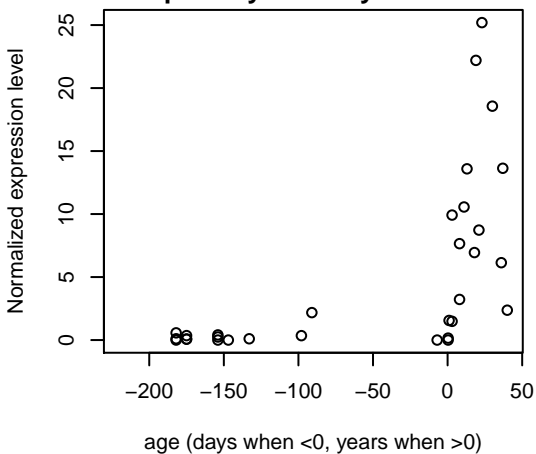

**CNDP1\_72223572\_72223701**  
( $P=3e-04$ , Diff =  $-20.99$ )  
primary auditory cortex

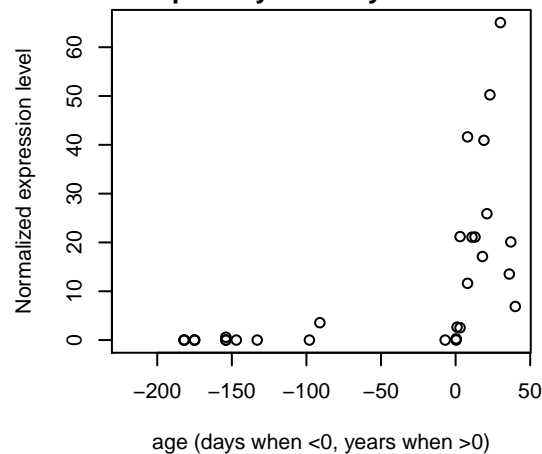

**CNDP1\_72226557\_72226707**  
( $P=4e-04$ , Diff =  $-20.73$ )  
primary auditory cortex

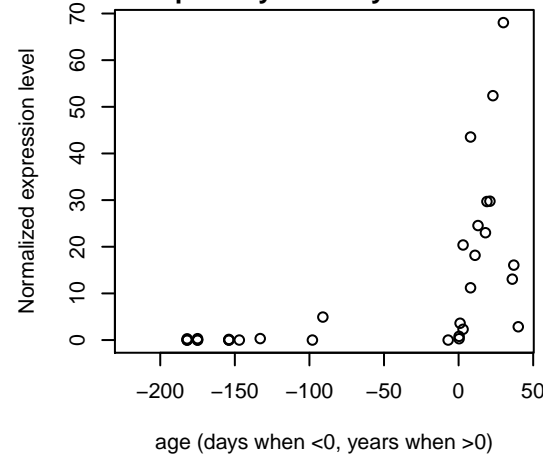

**CNDP1\_72228090\_72228253**  
( $P=0.003$ , Diff =  $-30.8$ )  
primary auditory cortex

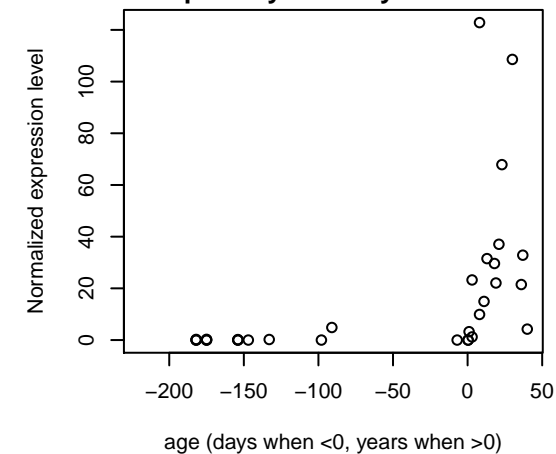

**CNDP1\_72229281\_72229370**  
( $P=8e-04$ , Diff =  $-48.4$ )  
primary auditory cortex

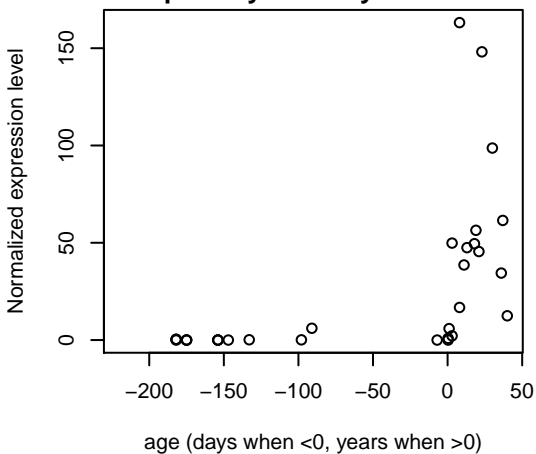

**CNDP1\_72234467\_72234668**  
( $P=1e-04$ , Diff =  $-50.28$ )  
primary auditory cortex

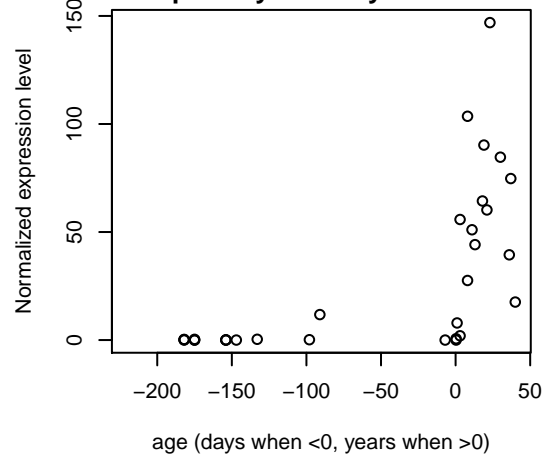

**CNDP1\_72238420\_72238505**  
( $P=6e-04$ , Diff =  $-54.28$ )  
primary auditory cortex

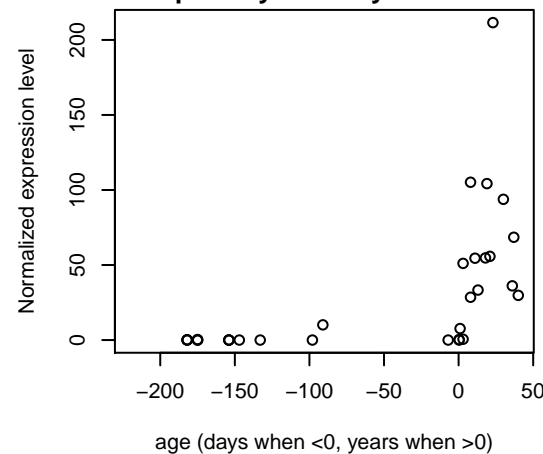

**CNDP1\_72244103\_72244264**  
( $P=0$ , Diff =  $-36.9$ )  
primary auditory cortex

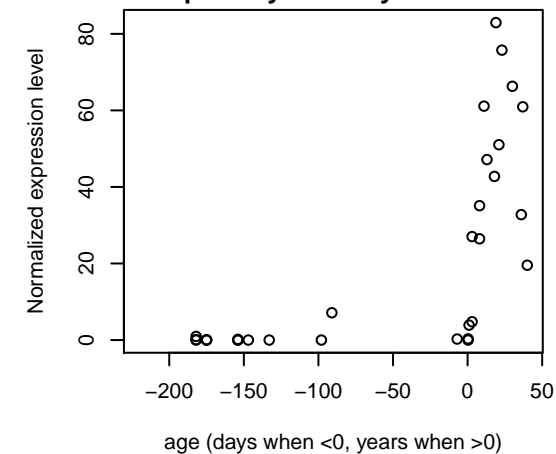

**CNDP1\_72245397\_72245562**  
( $P=2e-04$ , Diff =  $-51.46$ )  
primary auditory cortex

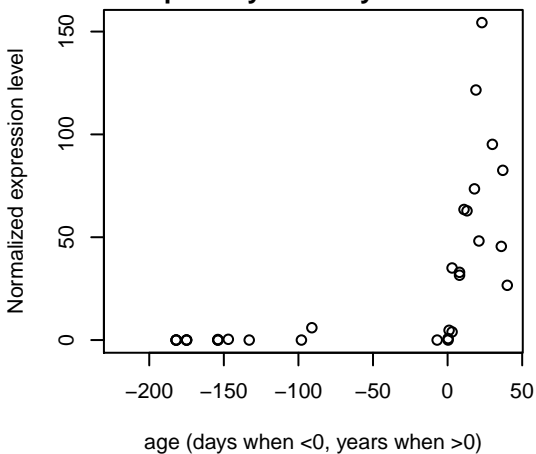

**CNDP1\_72247365\_72247507**  
( $P=1e-04$ , Diff =  $-64.13$ )  
primary auditory cortex

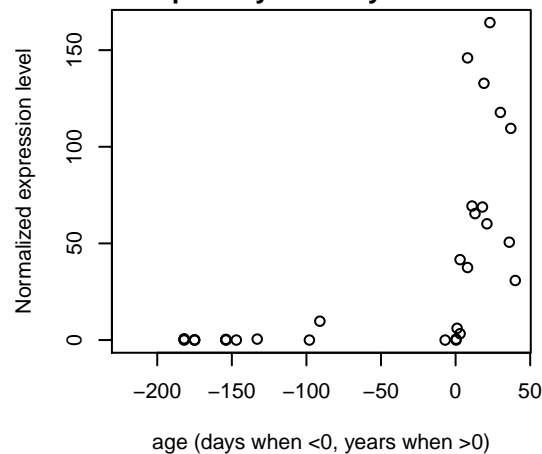

**CNDP1\_72250796\_72250944**  
( $P=1e-04$ , Diff =  $-57.61$ )  
primary auditory cortex

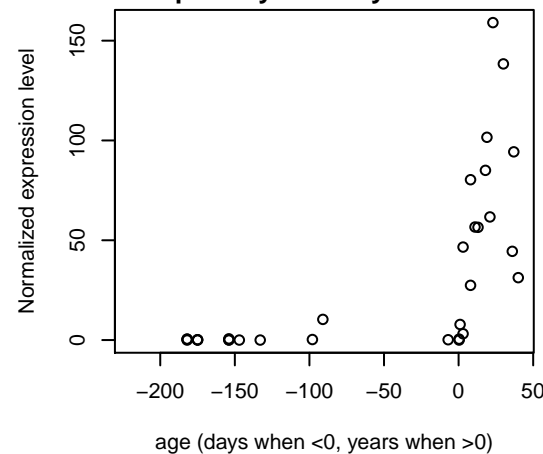

**CNDP1\_72251731\_72252261**  
( $P=1e-04$ , Diff =  $-36.82$ )  
primary auditory cortex

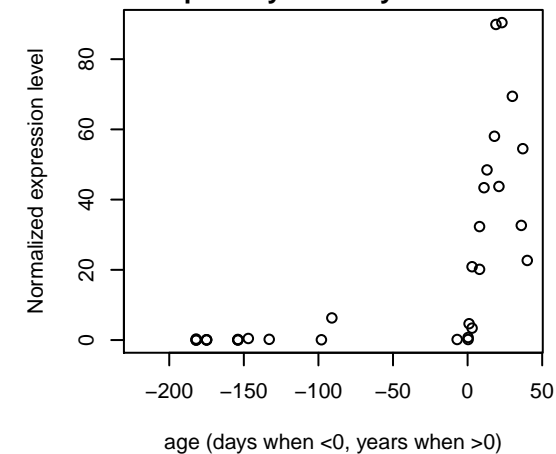

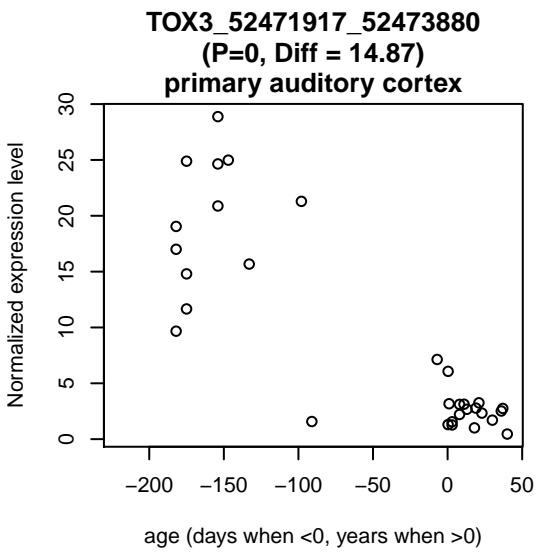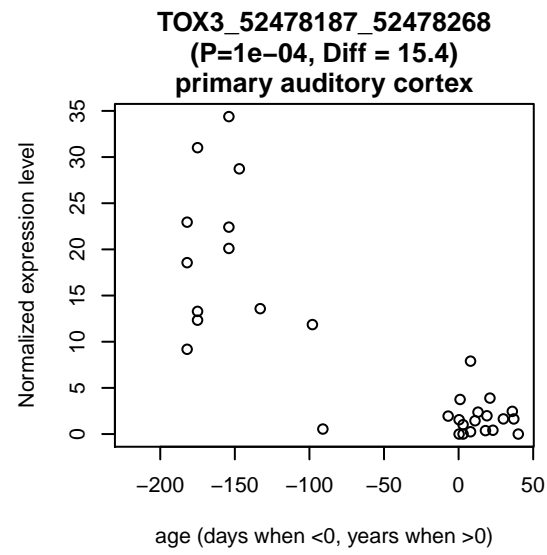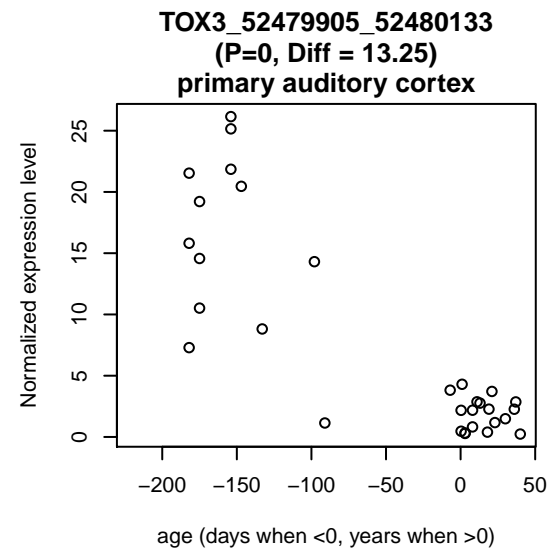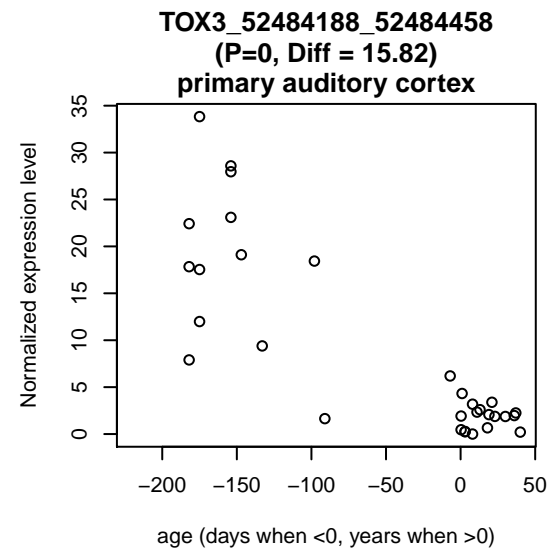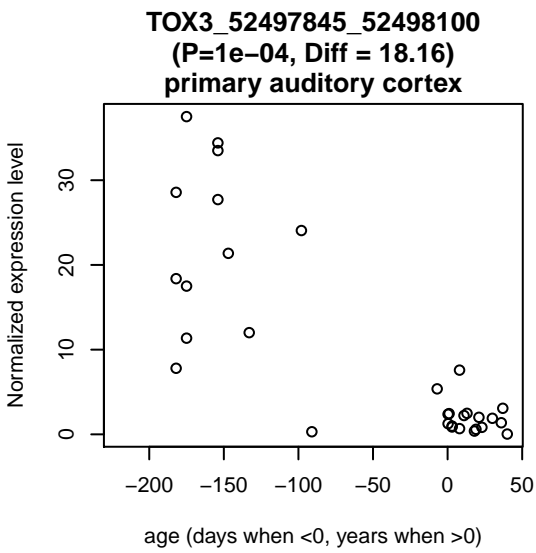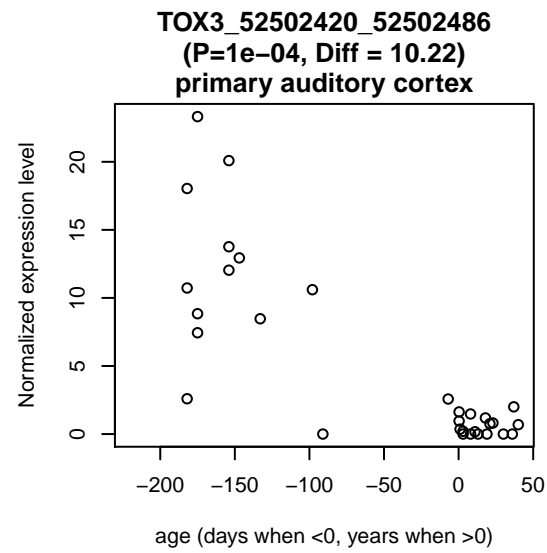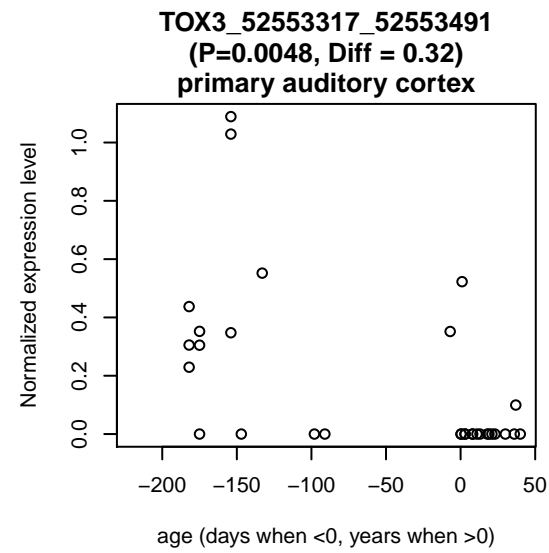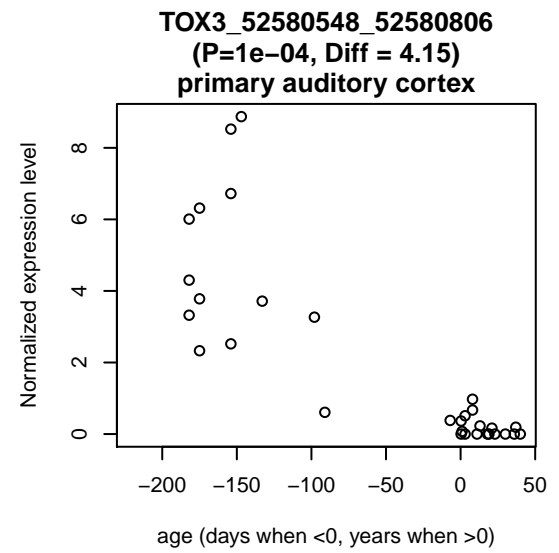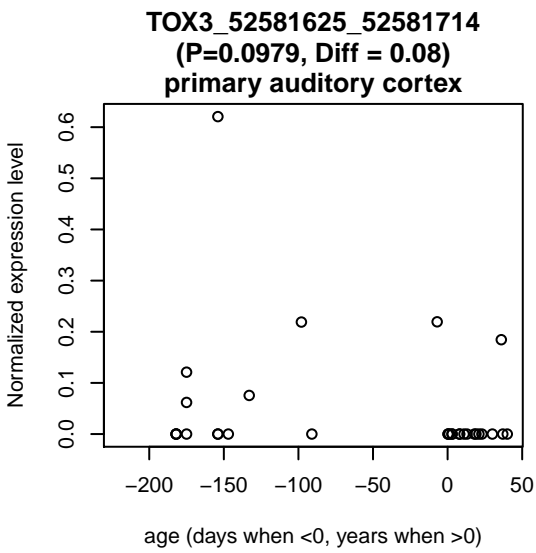

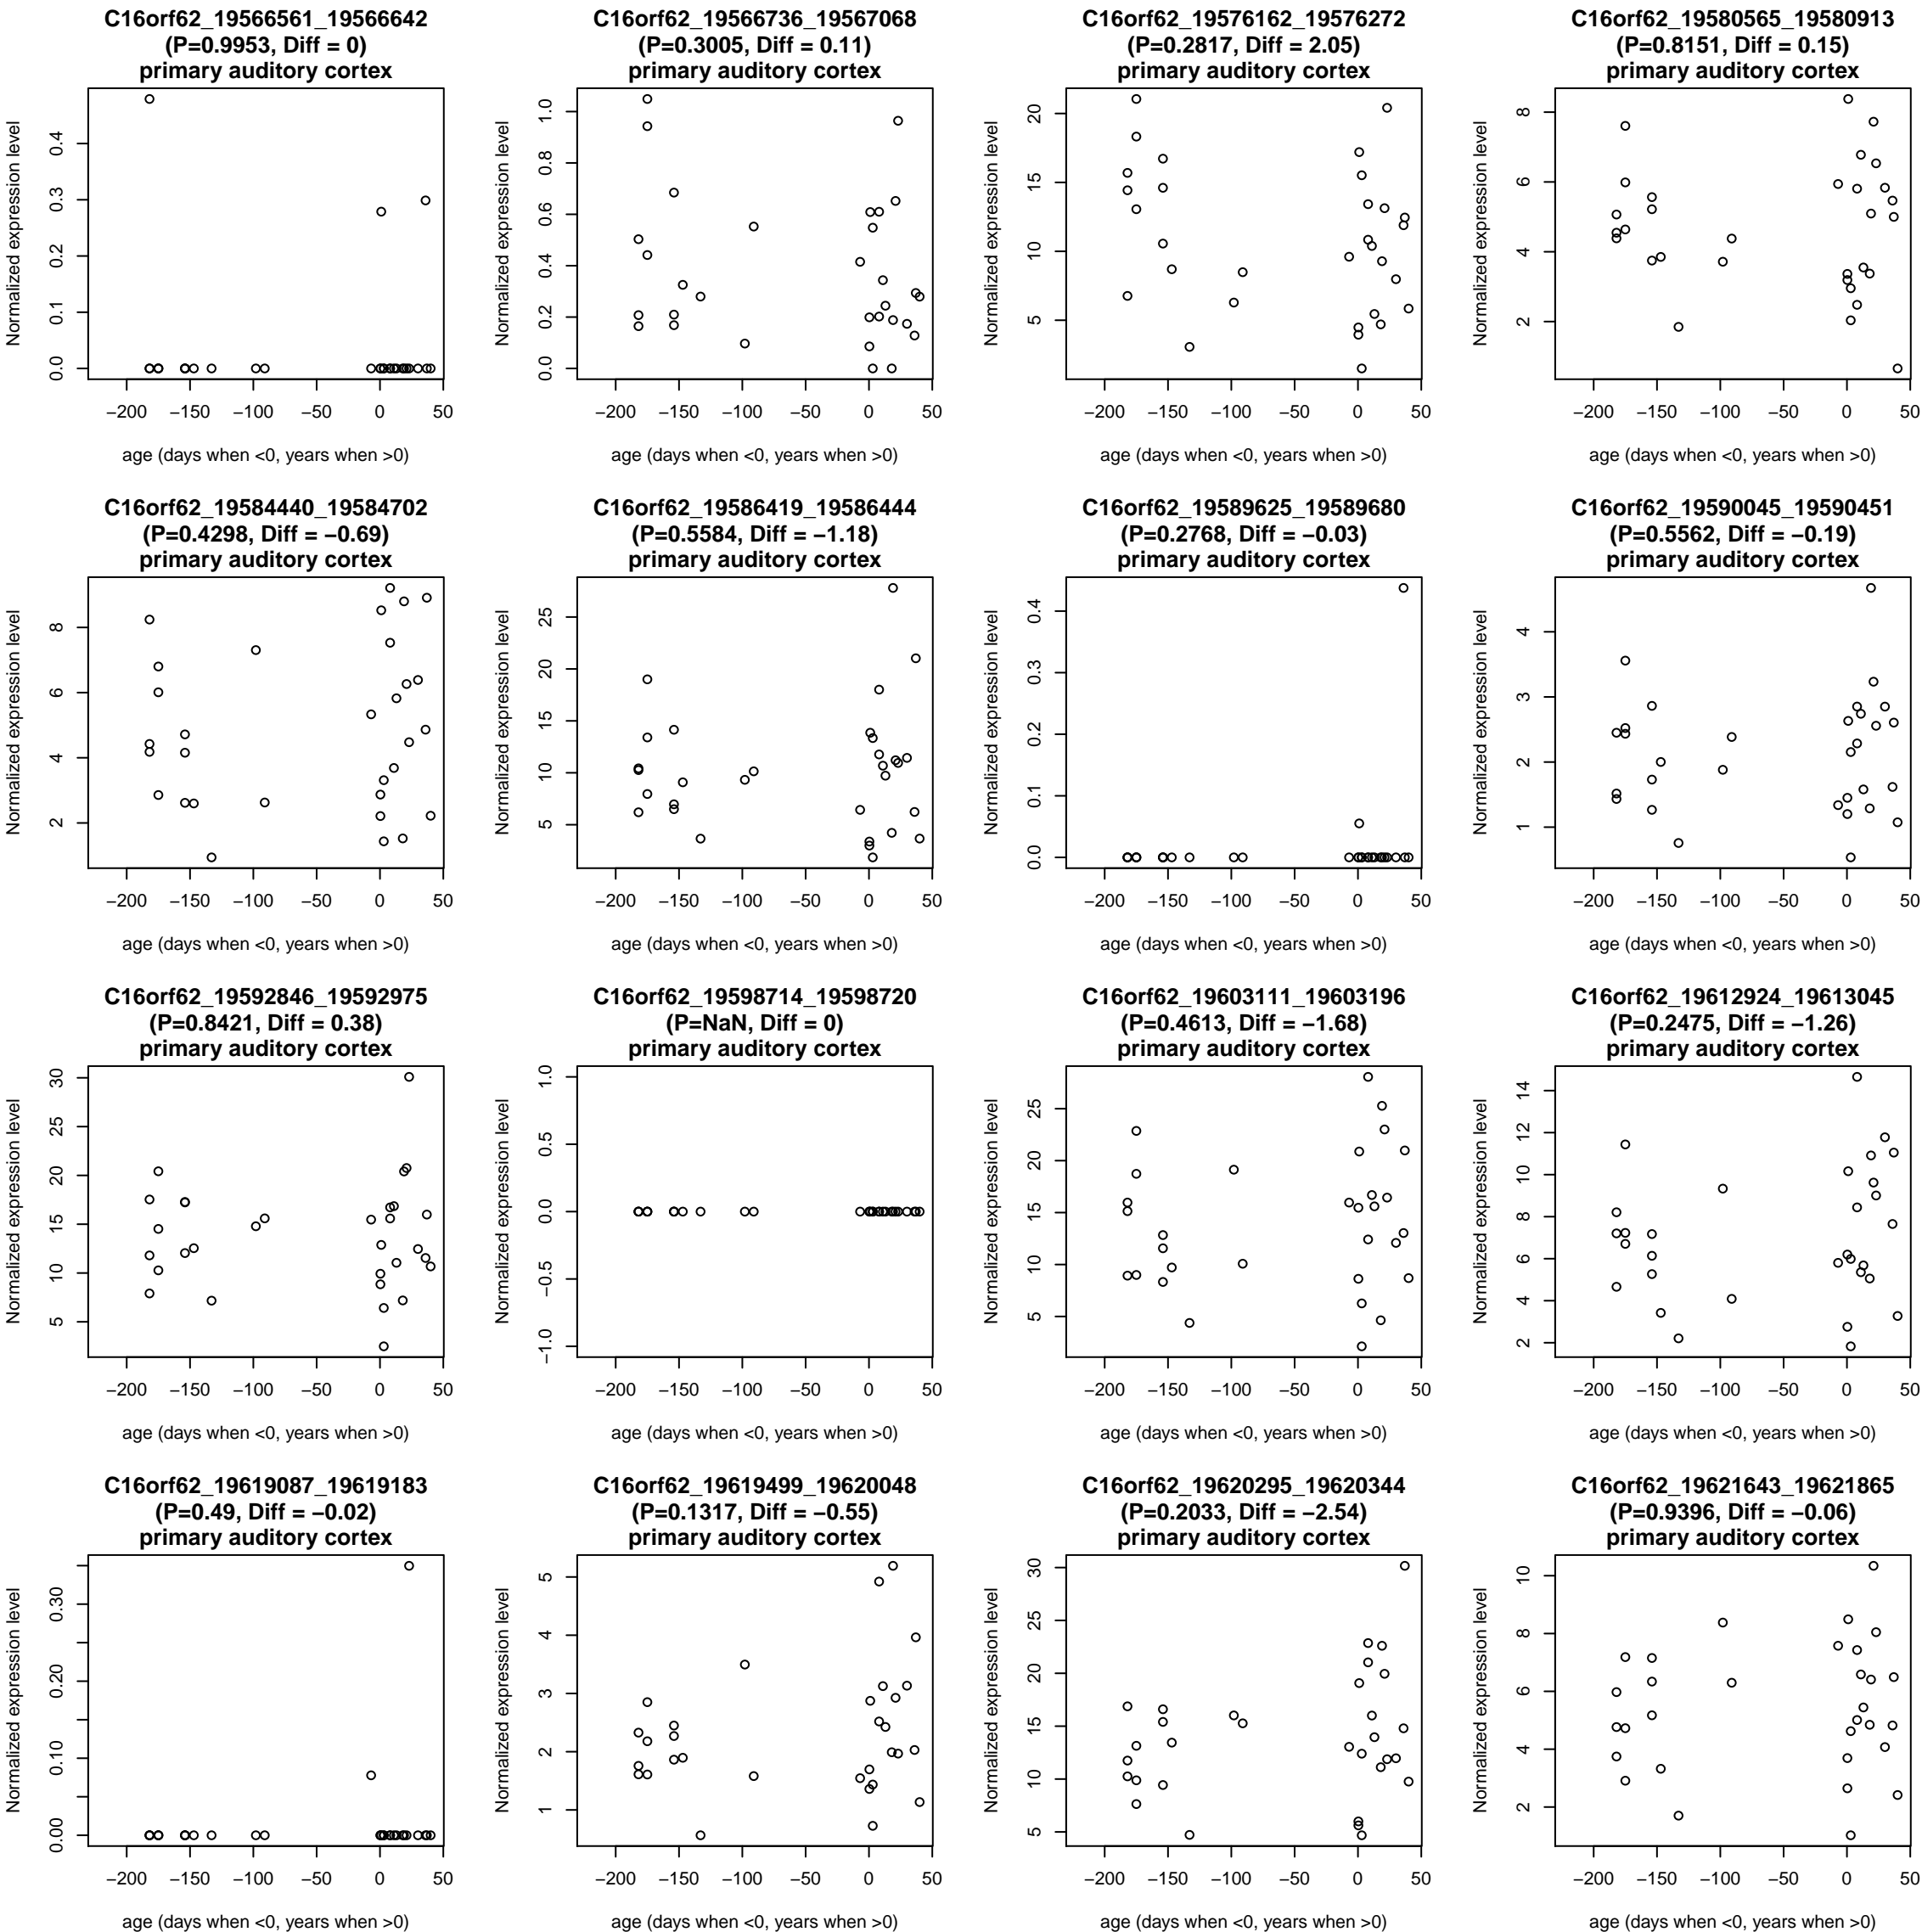



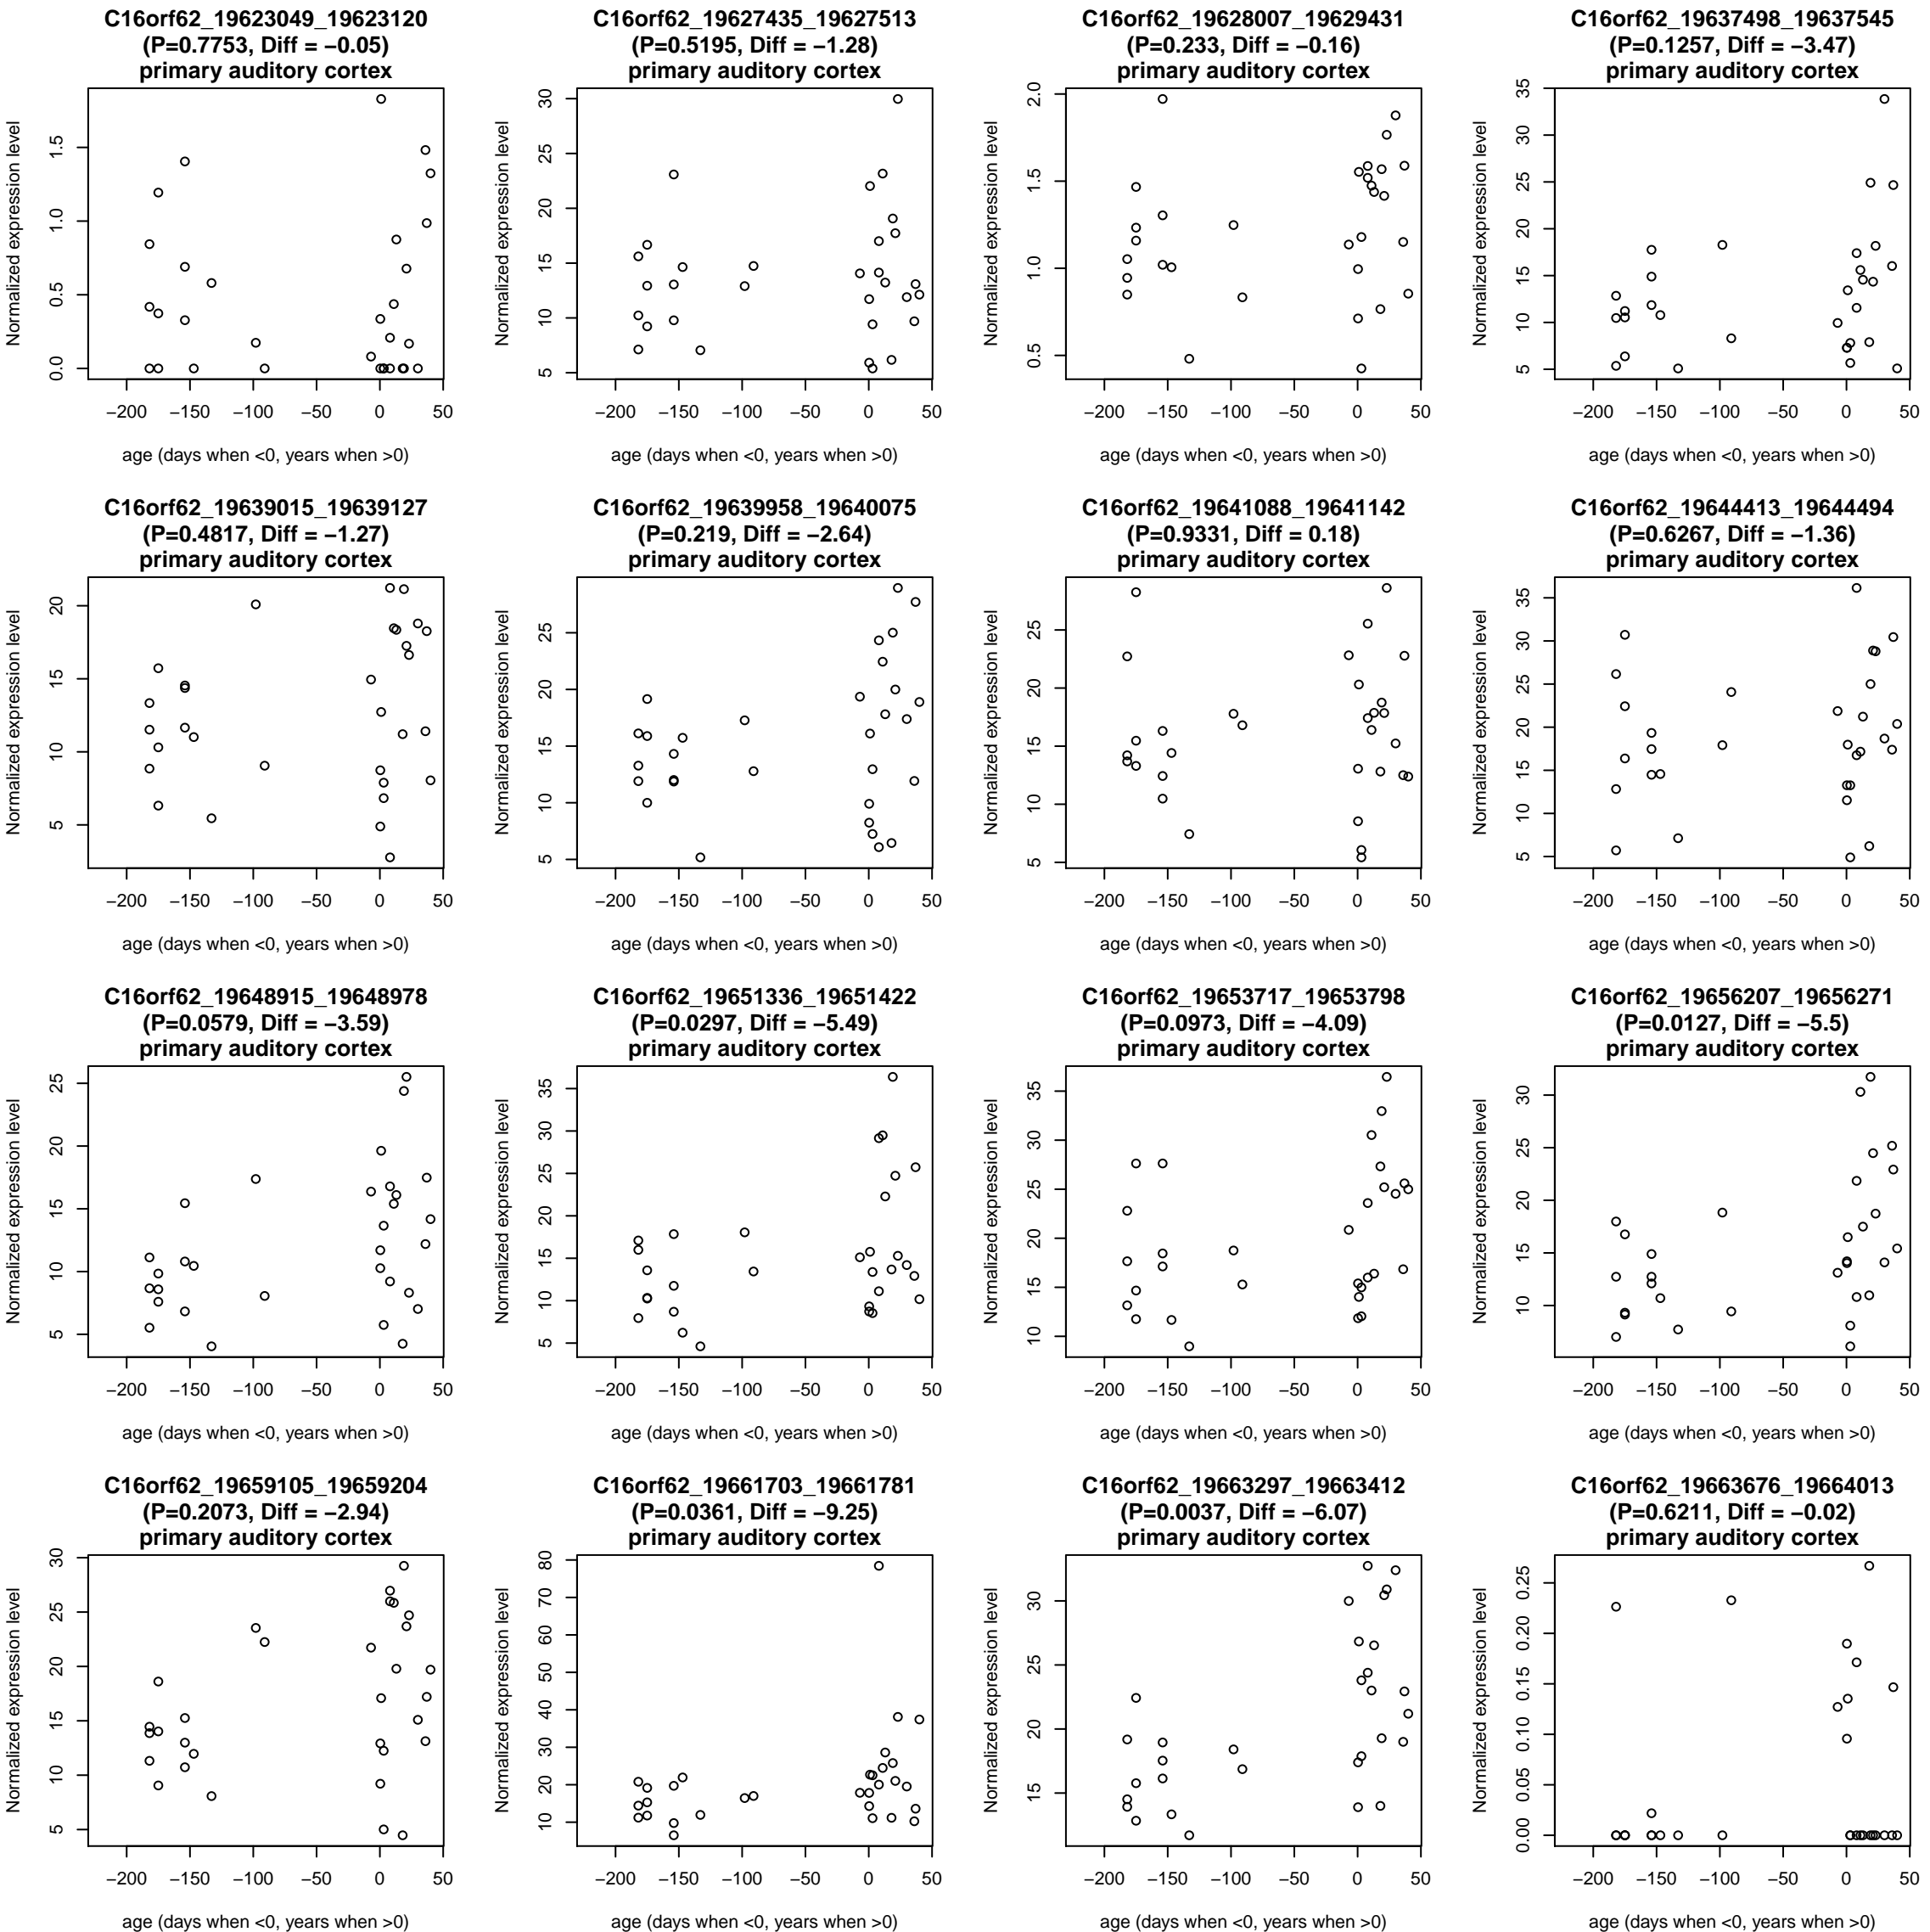

**C16orf62\_19680481\_19680621**  
( $P=8e-04$ , Diff =  $-6.85$ )  
primary auditory cortex

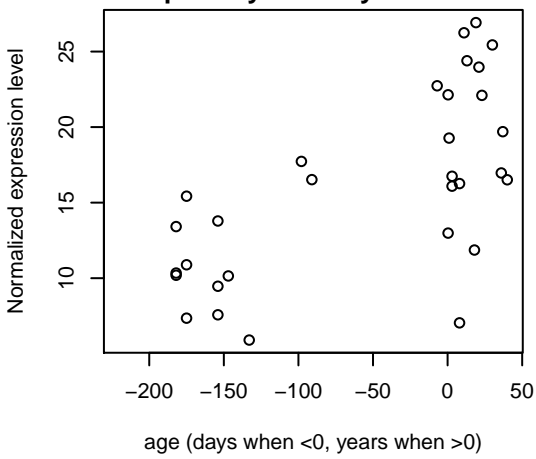

**C16orf62\_19693546\_19693712**  
( $P=0.0012$ , Diff =  $-8.13$ )  
primary auditory cortex

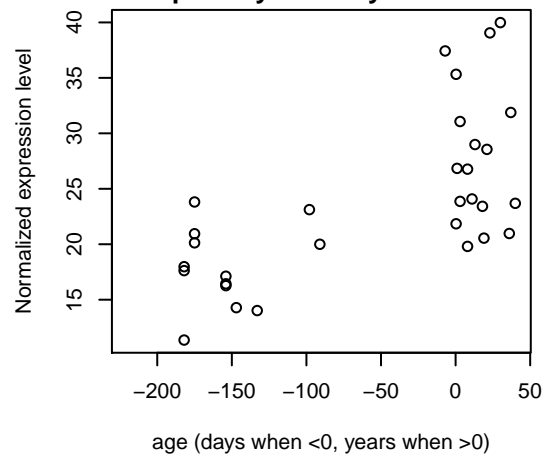

**C16orf62\_19702674\_19702793**  
( $P=0.005$ , Diff =  $-8.19$ )  
primary auditory cortex

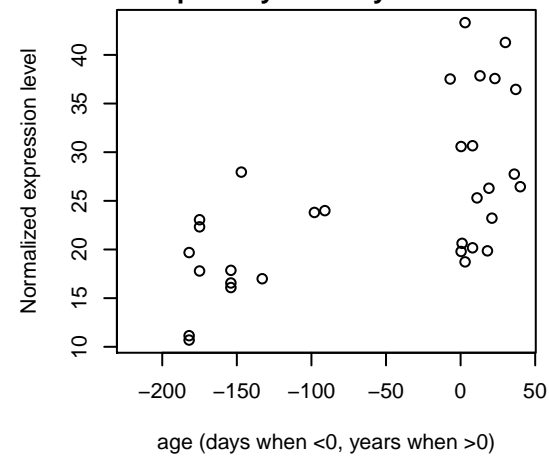

**C16orf62\_19710823\_19710970**  
( $P=0.0087$ , Diff =  $-10.45$ )  
primary auditory cortex

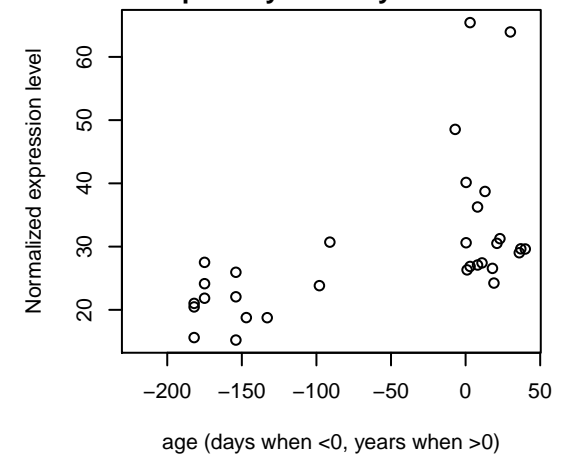

**C16orf62\_19711699\_19712448**  
( $P=3e-04$ , Diff =  $-4.63$ )  
primary auditory cortex

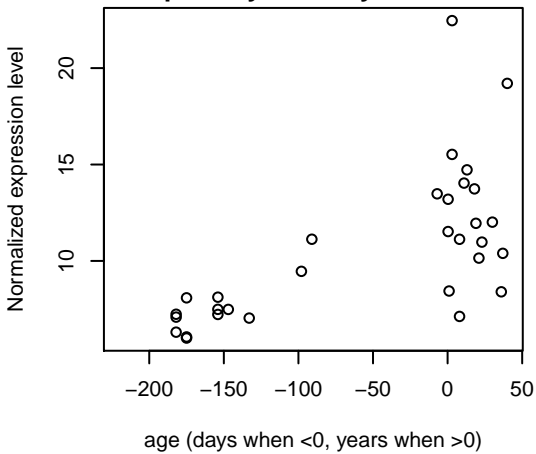

**C16orf62\_19716437\_19716880**  
( $P=0.0011$ , Diff =  $1.62$ )  
primary auditory cortex

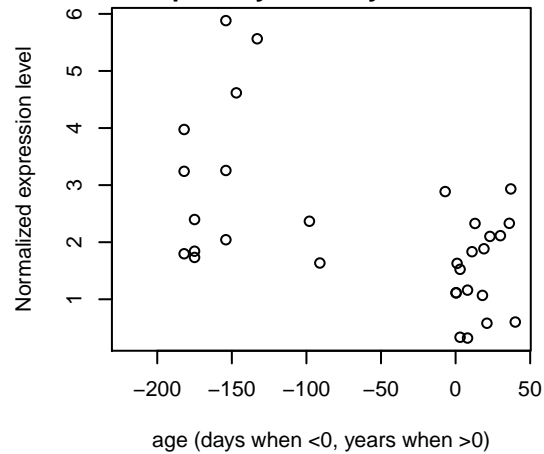

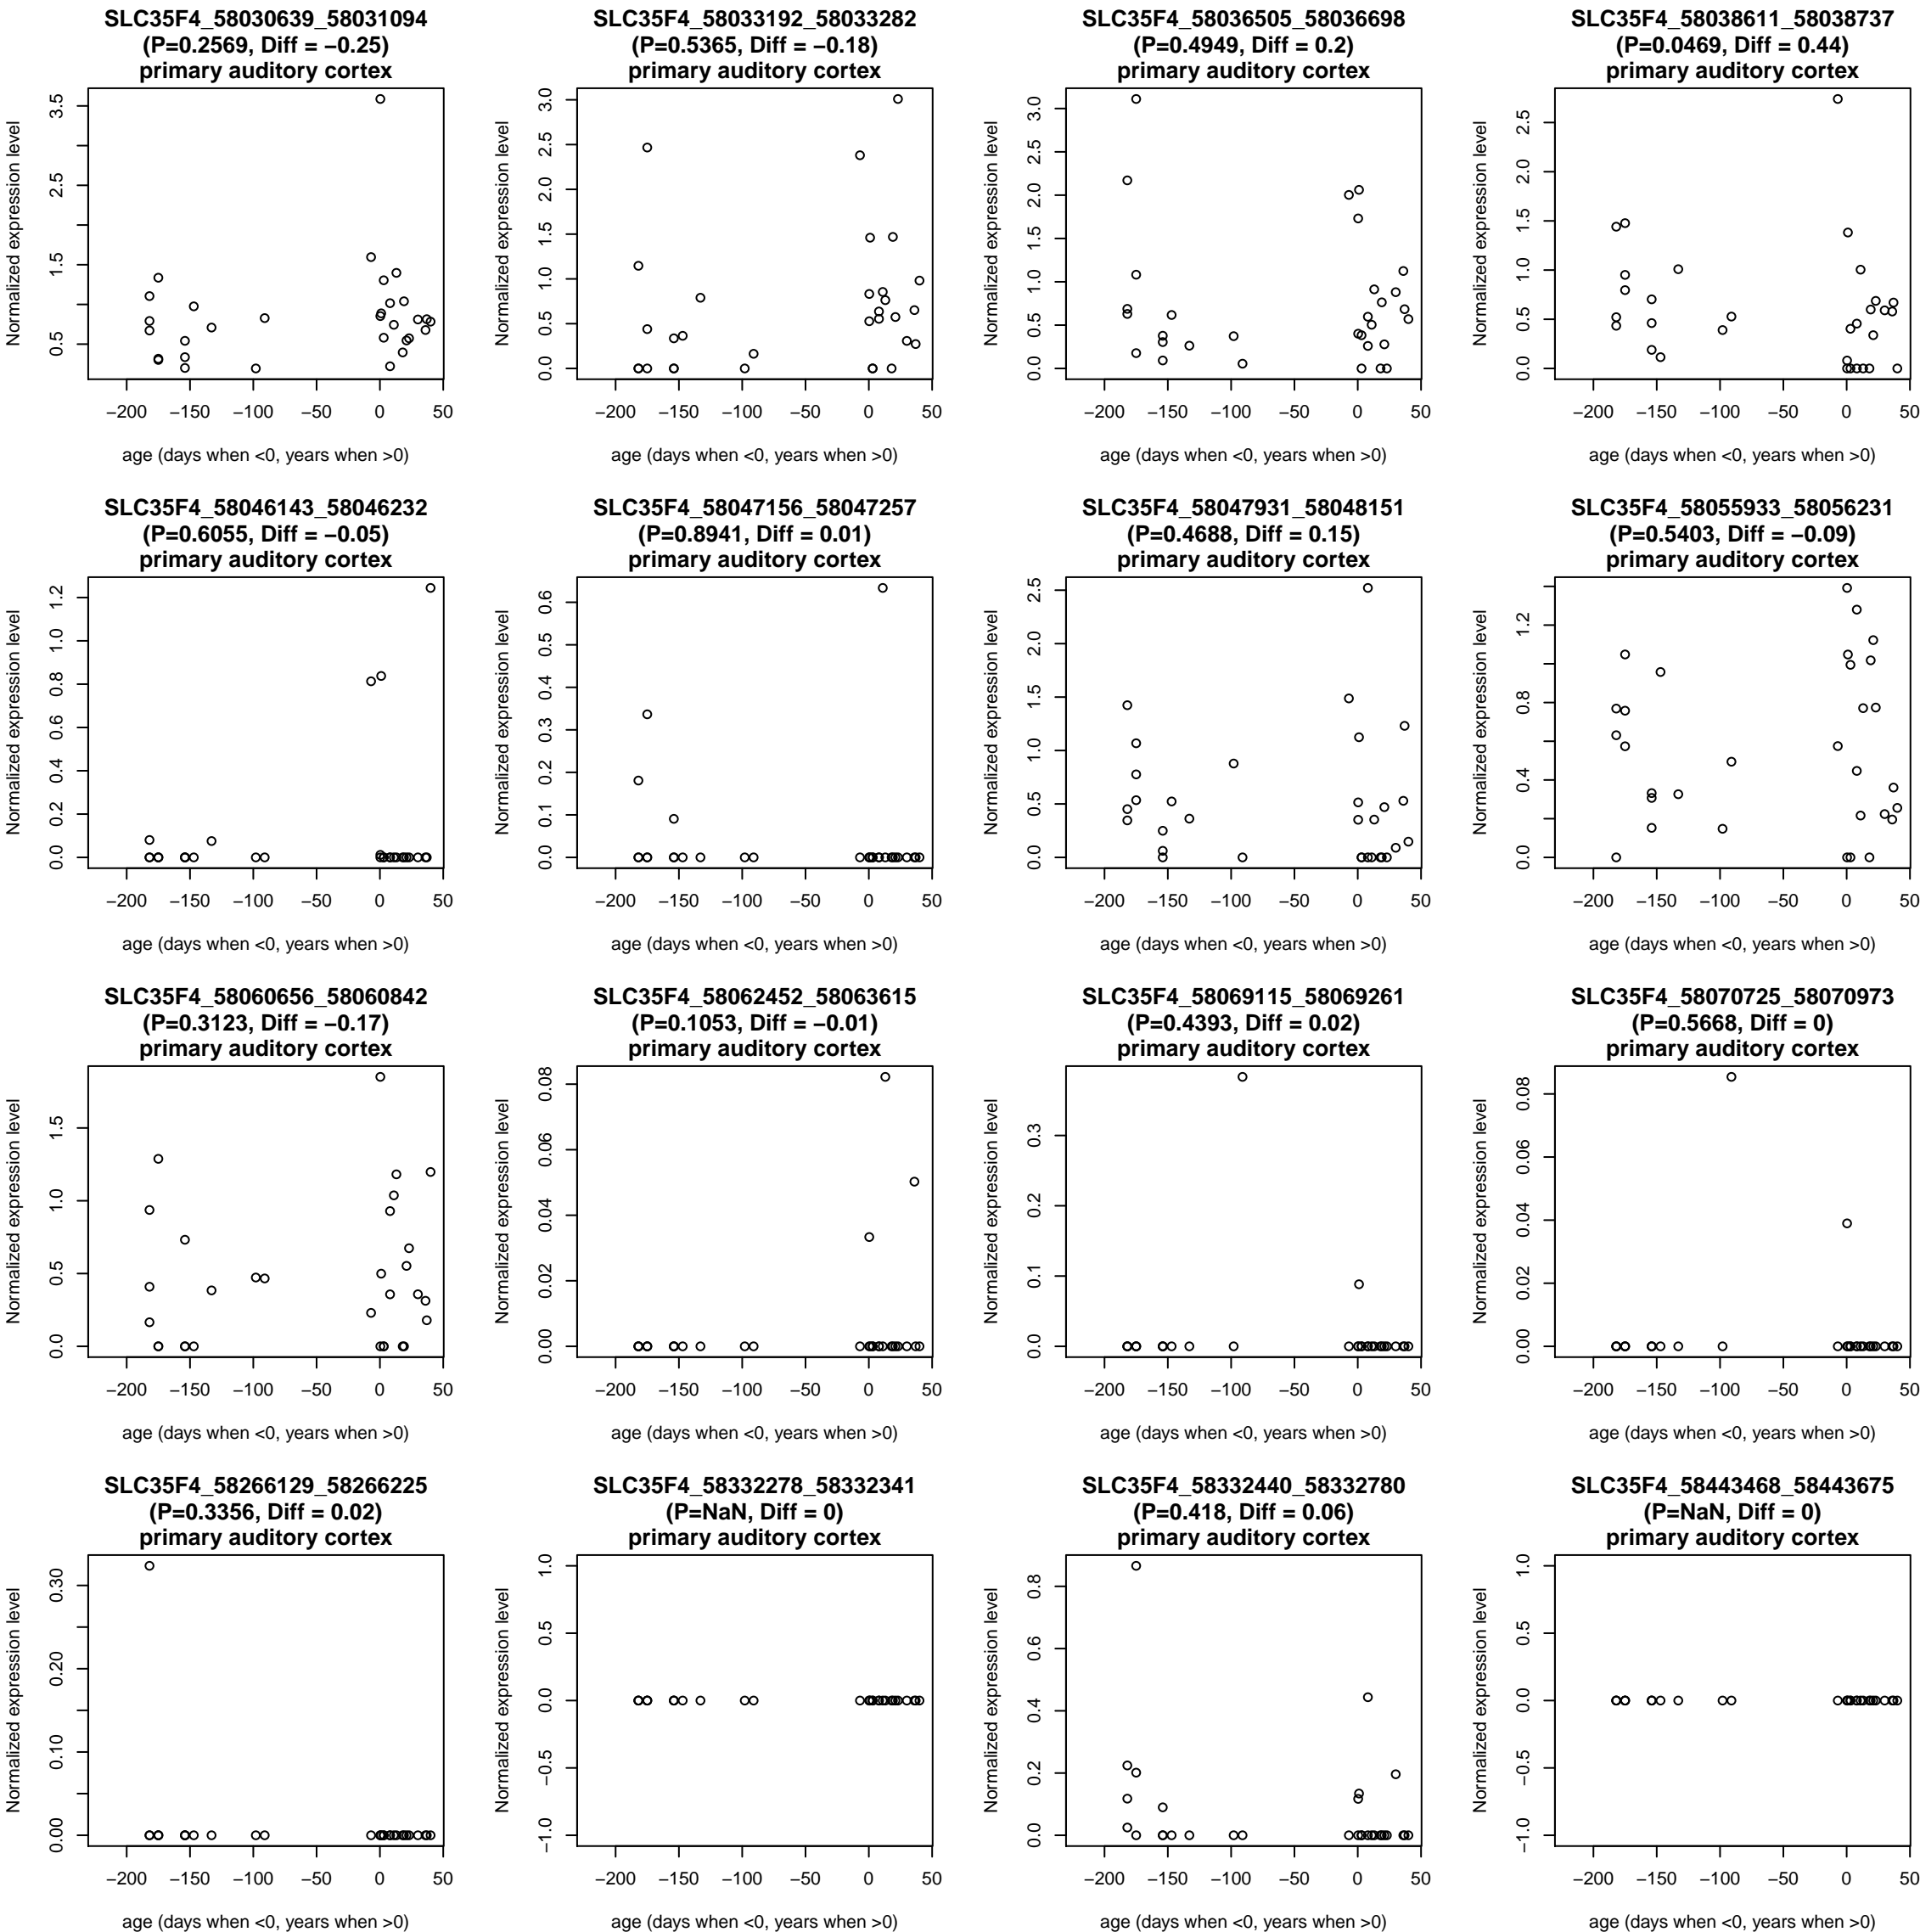

**SLC35F4\_58448630\_58448912**  
**(P=0.165, Diff = -0.02)**  
**primary auditory cortex**

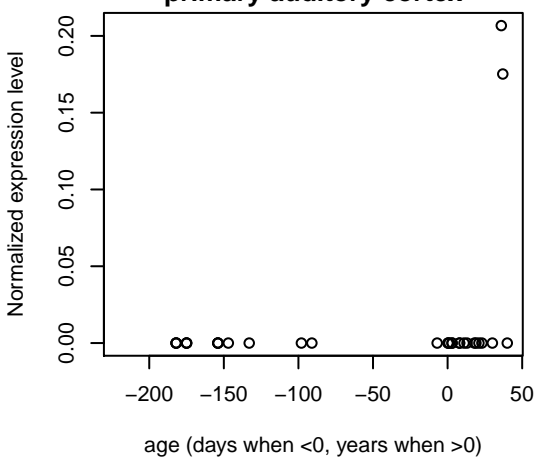

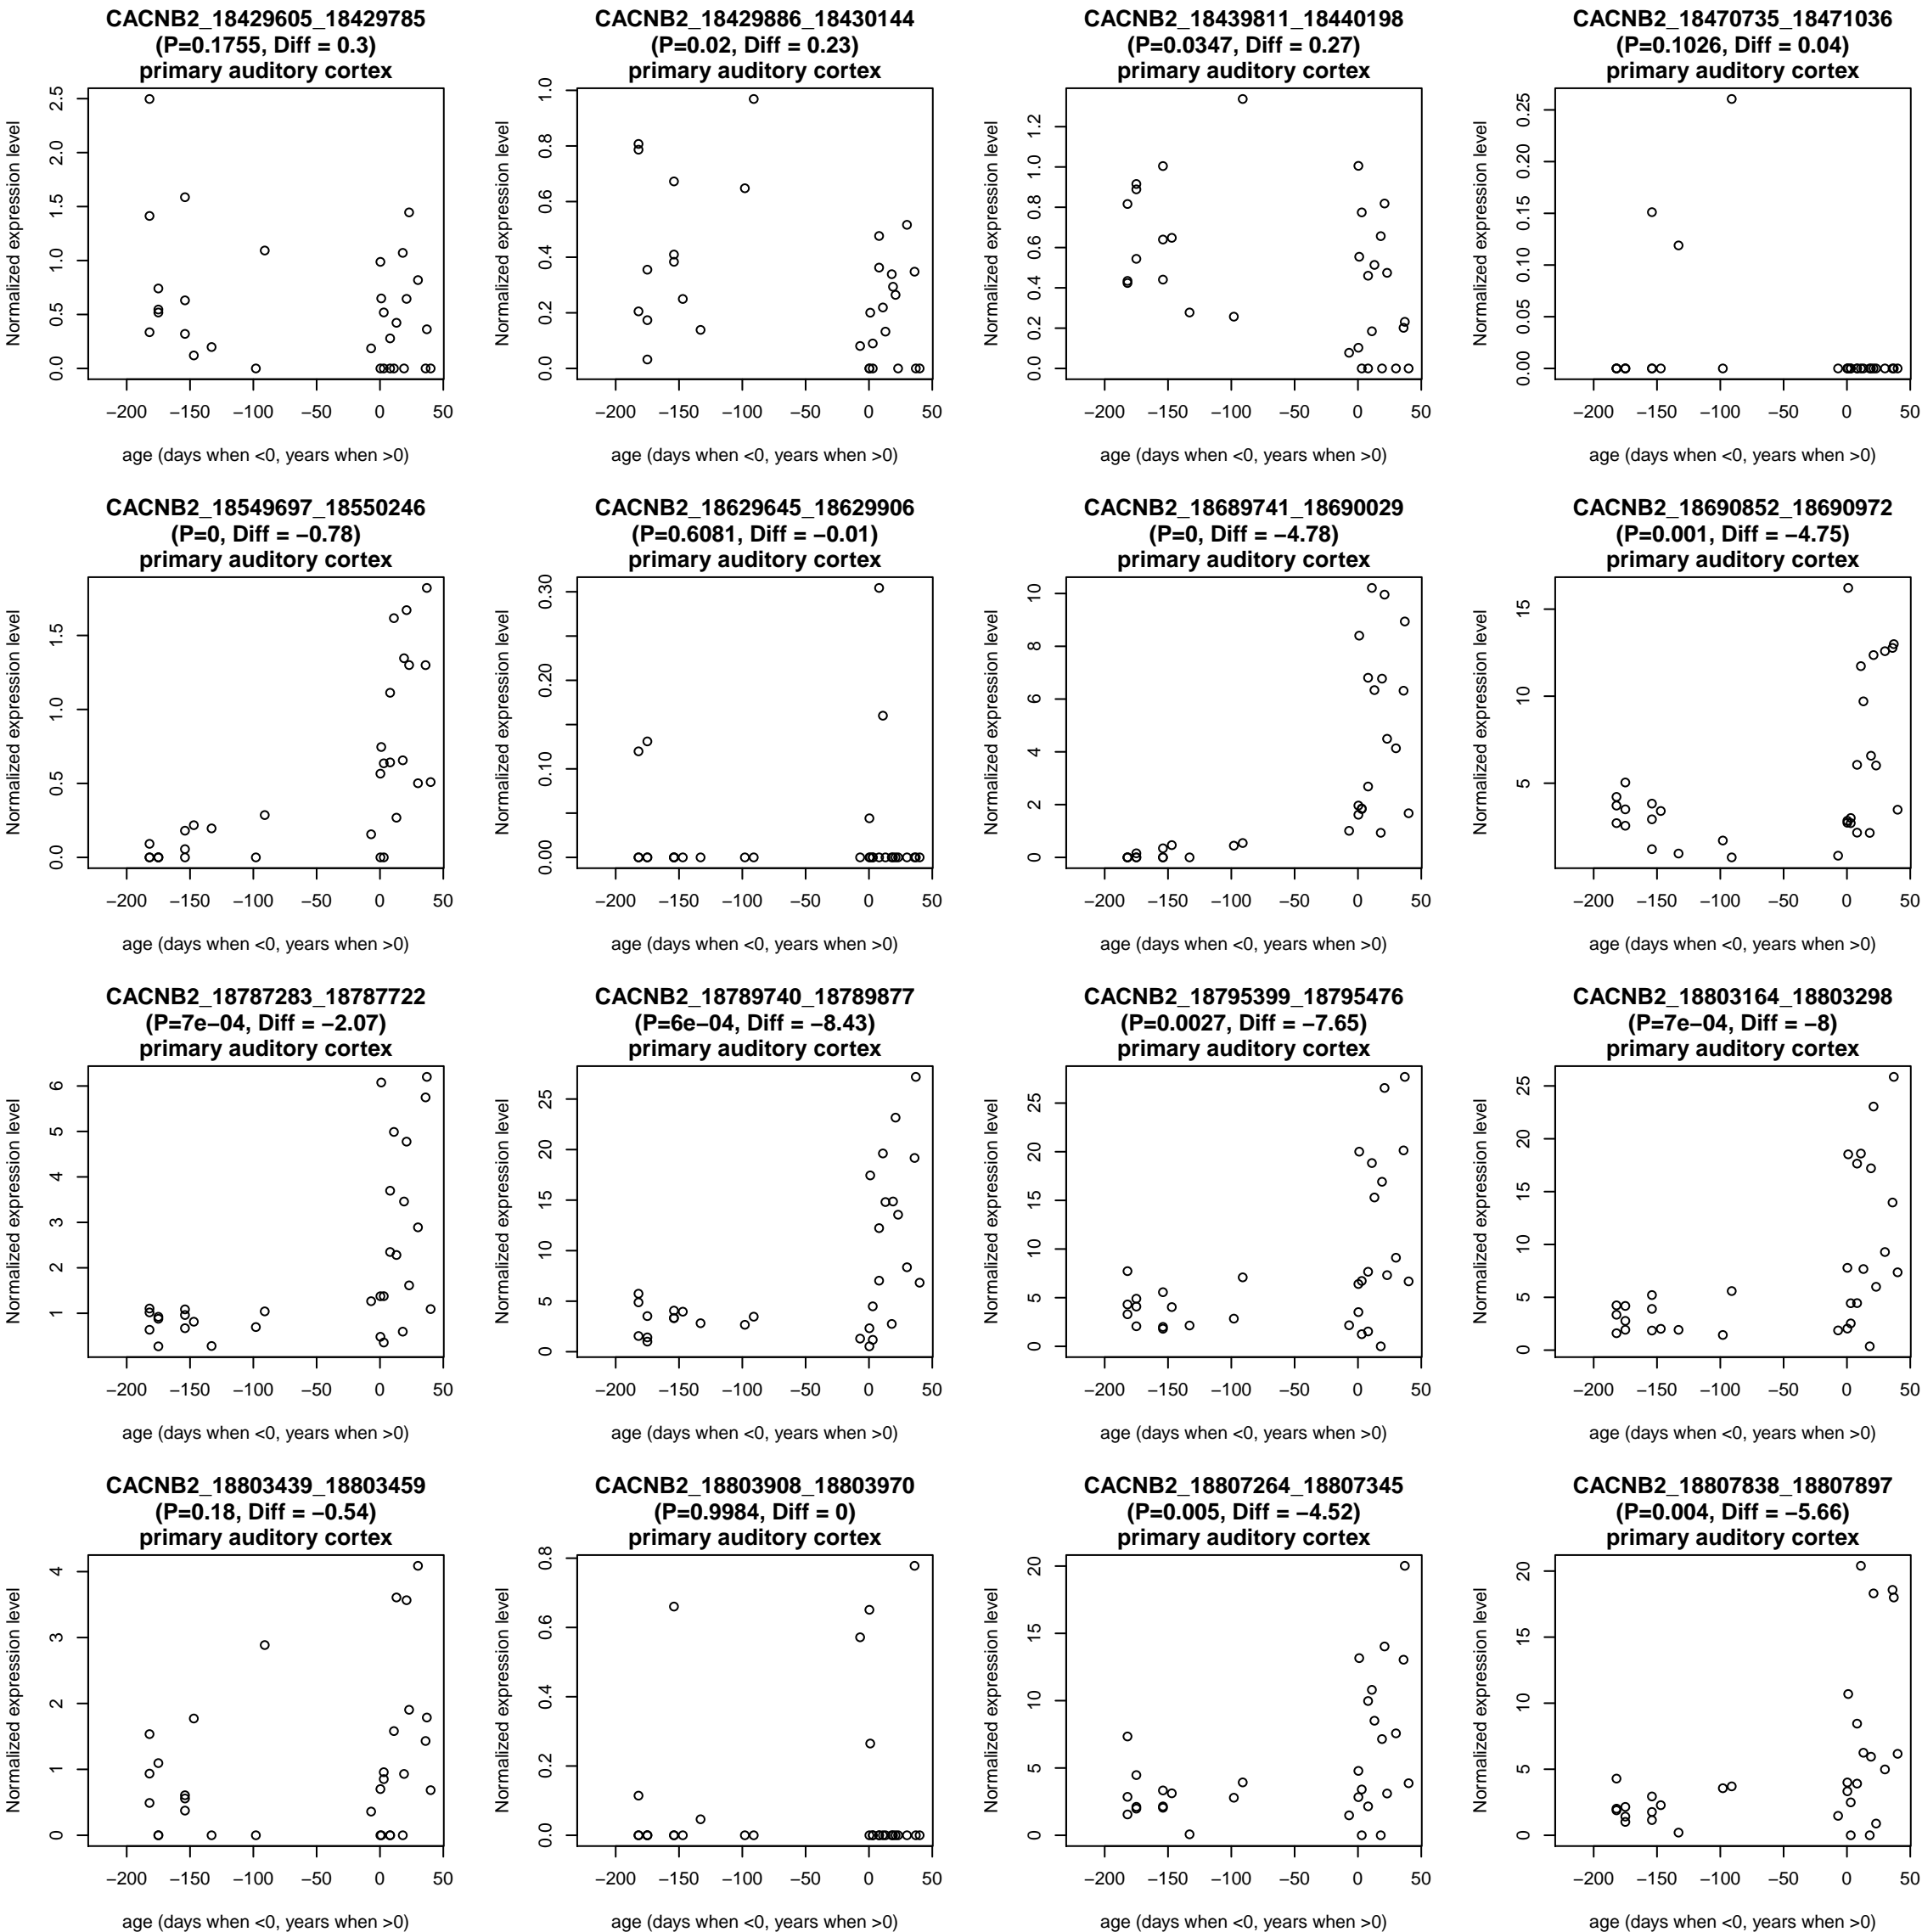

**CACNB2\_18816516\_18816626**  
( $P=2e-04$ , Diff = -8.44)  
primary auditory cortex

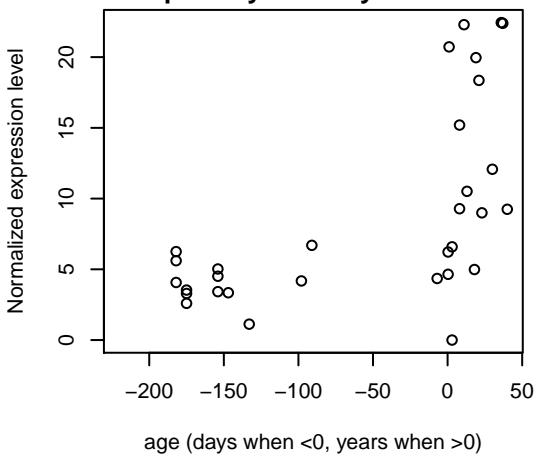

**CACNB2\_18823004\_18823156**  
( $P=7e-04$ , Diff = -8.42)  
primary auditory cortex

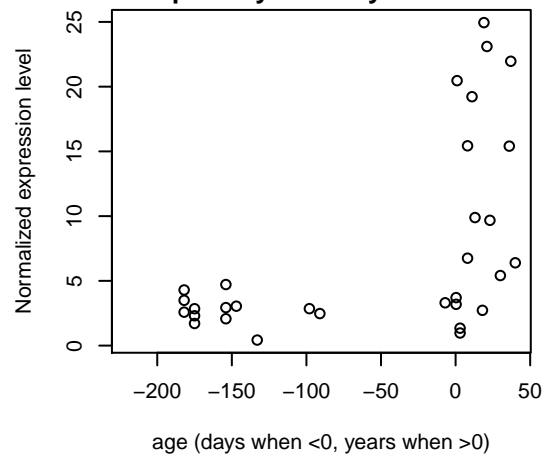

**CACNB2\_18825029\_18825125**  
( $P=7e-04$ , Diff = -8.53)  
primary auditory cortex

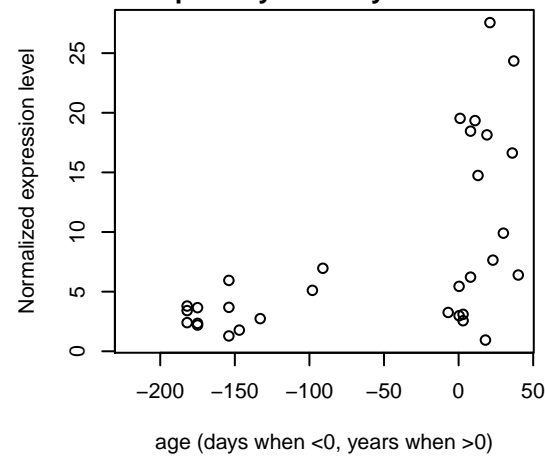

**CACNB2\_18827108\_18827294**  
( $P=4e-04$ , Diff = -10.67)  
primary auditory cortex

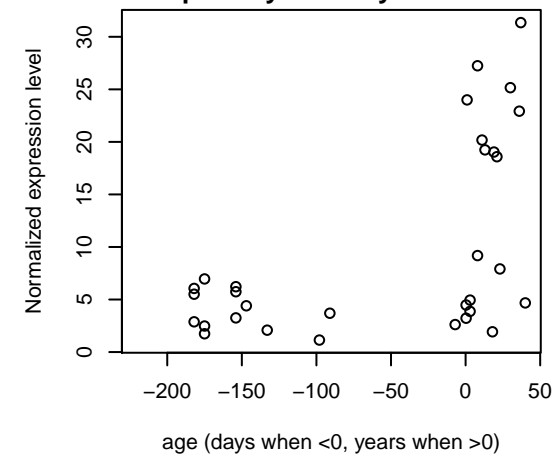

**CACNB2\_18828158\_18830798**  
( $P=0$ , Diff = -7.27)  
primary auditory cortex

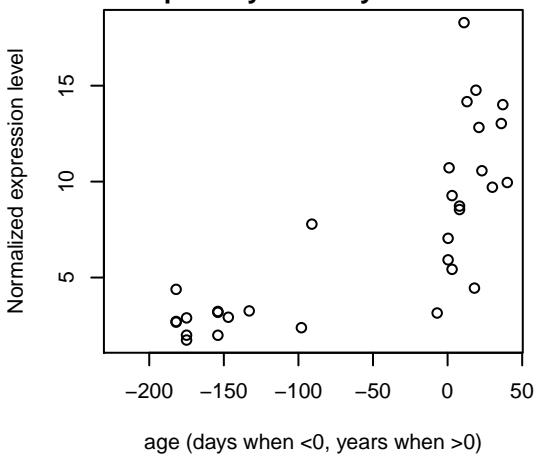

**CTH\_70876900\_70877266**  
(P=0.374, Diff = 0.28)  
primary auditory cortex

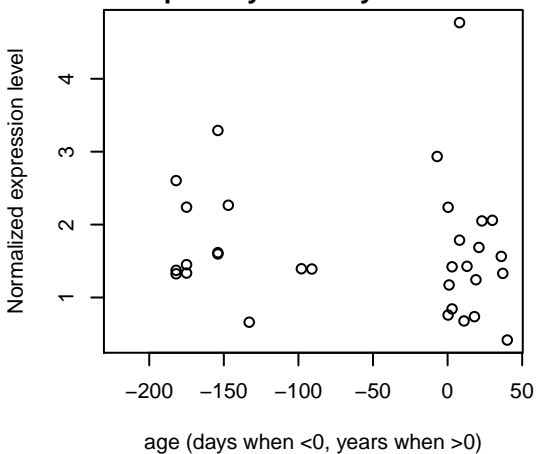

**CTH\_70881638\_70881720**  
(P=0.4765, Diff = -0.31)  
primary auditory cortex

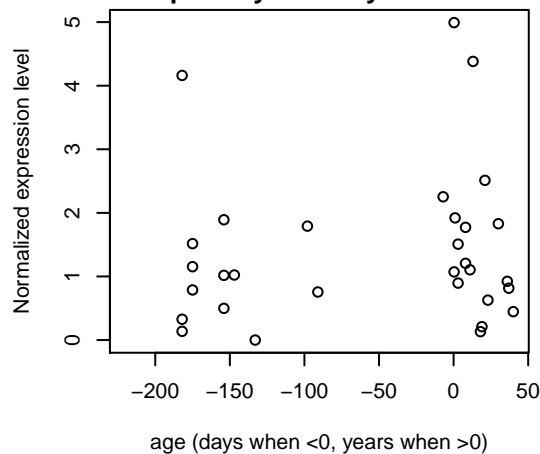

**CTH\_70883619\_70883715**  
(P=0.3142, Diff = 0.34)  
primary auditory cortex

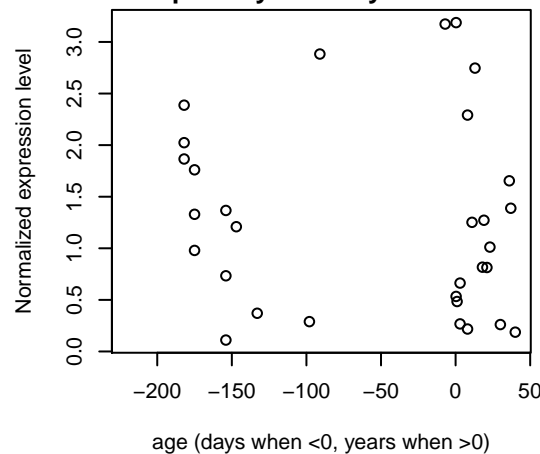

**CTH\_70887248\_70887358**  
(P=0.697, Diff = -0.2)  
primary auditory cortex

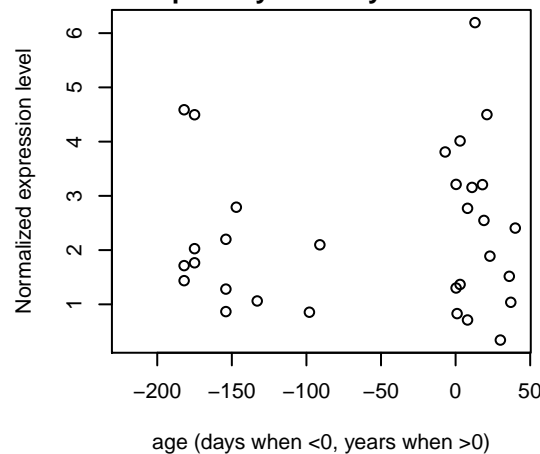

**CTH\_70889967\_70890099**  
(P=0.2496, Diff = 0.57)  
primary auditory cortex

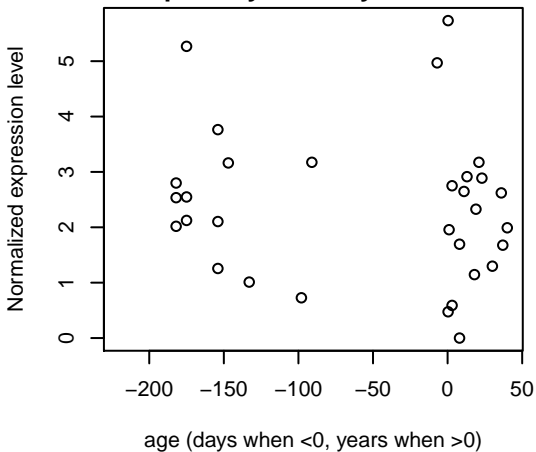

**CTH\_70895476\_70895534**  
(P=0.2402, Diff = 0.53)  
primary auditory cortex

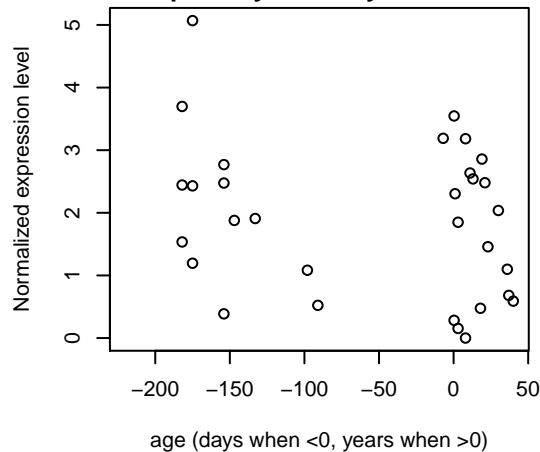

**CTH\_70895999\_70896077**  
(P=0.9653, Diff = 0.02)  
primary auditory cortex

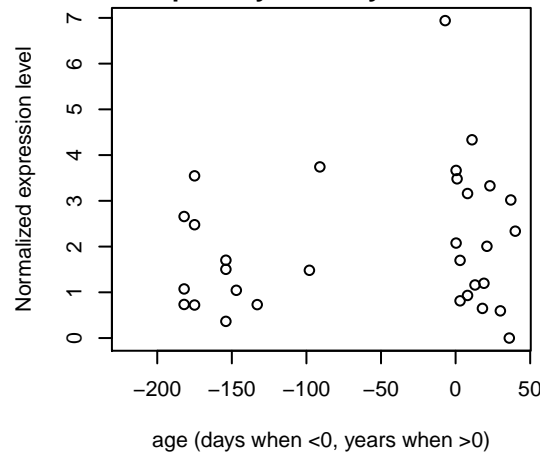

**CTH\_70897765\_70897918**  
(P=0.1867, Diff = -0.72)  
primary auditory cortex

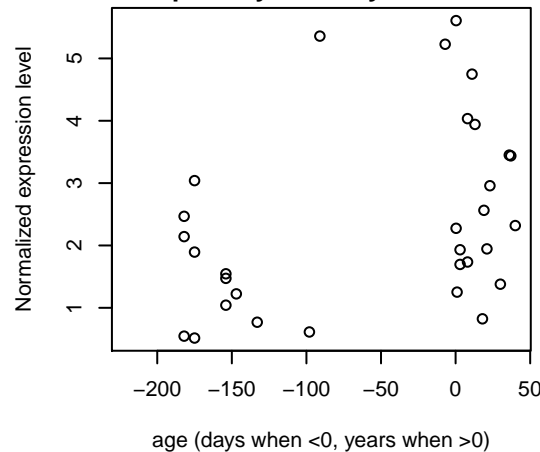

**CTH\_70899510\_70899632**  
(P=0.6427, Diff = -0.23)  
primary auditory cortex

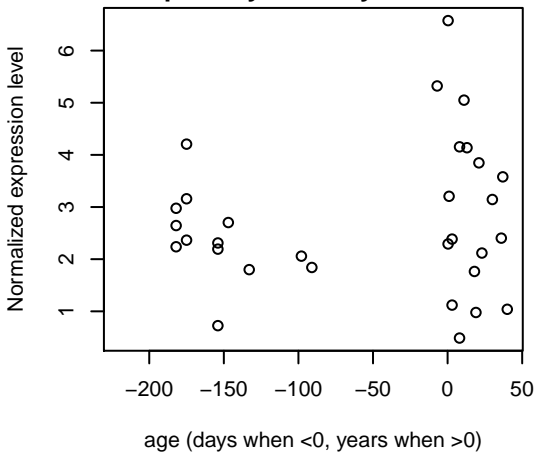

**CTH\_70900533\_70900860**  
(P=0.1495, Diff = -0.18)  
primary auditory cortex

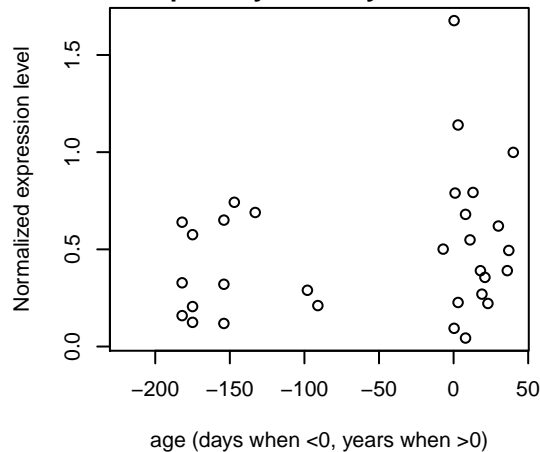

**CTH\_70904370\_70904509**  
(P=0.4214, Diff = -0.79)  
primary auditory cortex

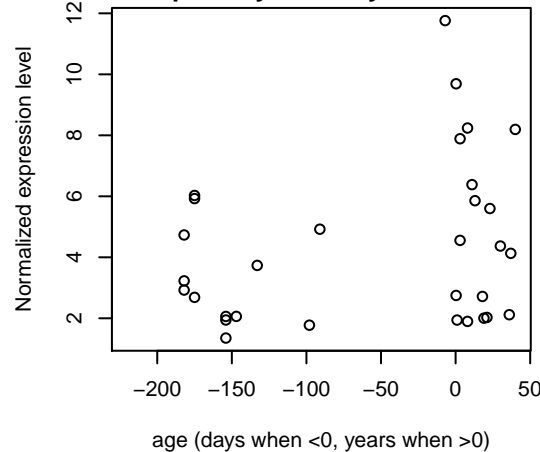

**CTH\_70904783\_70905534**  
(P=0.1482, Diff = -0.44)  
primary auditory cortex

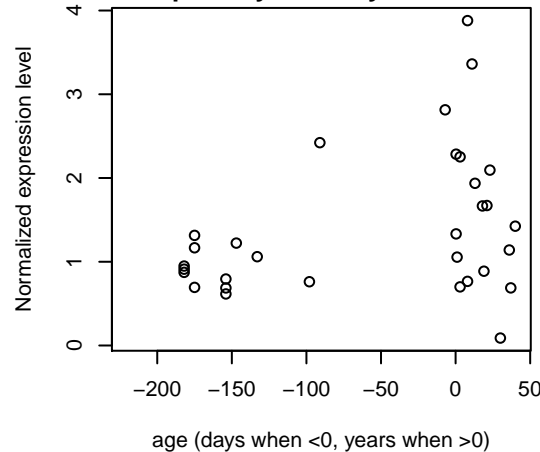

**SEC14L5\_5008317\_5008446**  
( $P=0.0021$ , Diff =  $-1.96$ )  
primary auditory cortex

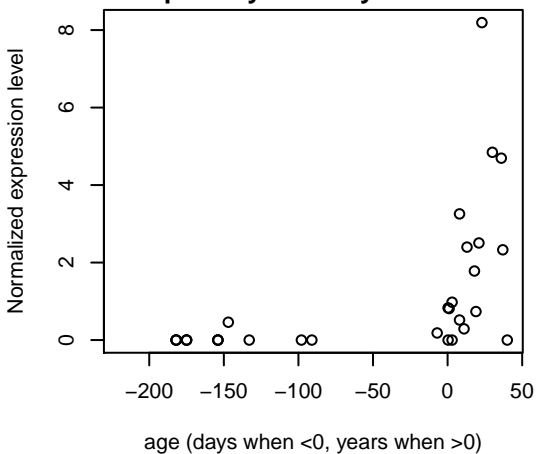

**SEC14L5\_5009273\_5009387**  
( $P=9e-04$ , Diff =  $-4.67$ )  
primary auditory cortex

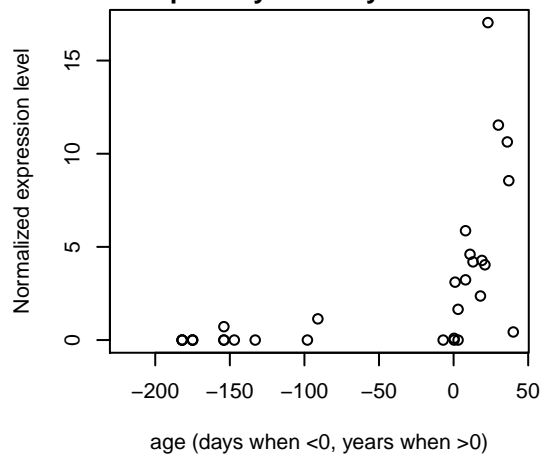

**SEC14L5\_5037557\_5037707**  
( $P=0.0076$ , Diff =  $-2.19$ )  
primary auditory cortex

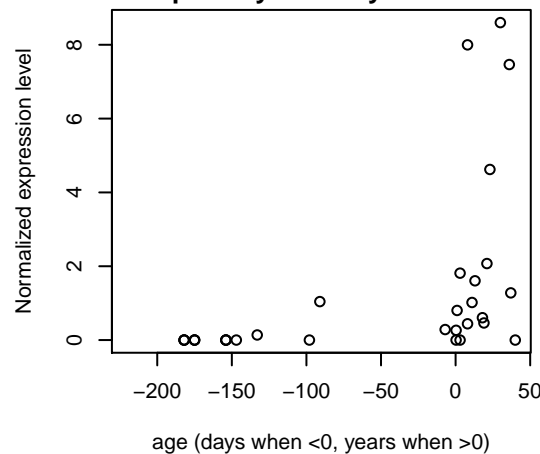

**SEC14L5\_5038149\_5038281**  
( $P=6e-04$ , Diff =  $-5.87$ )  
primary auditory cortex

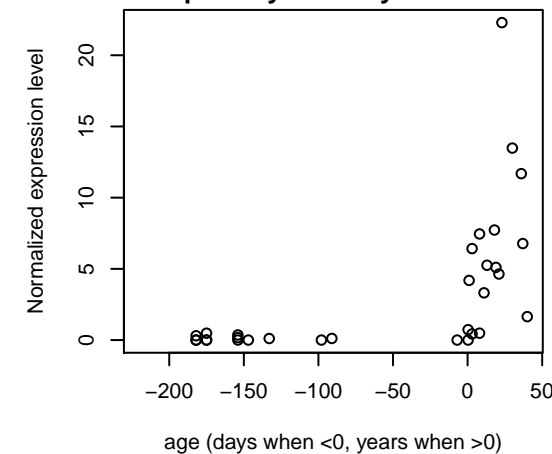

**SEC14L5\_5040767\_5040896**  
( $P=2e-04$ , Diff =  $-6.97$ )  
primary auditory cortex

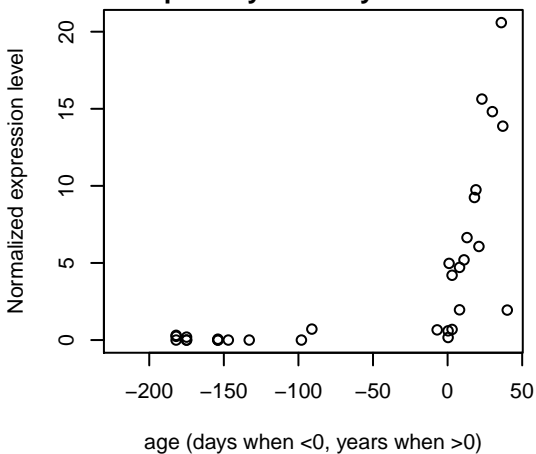

**SEC14L5\_5041838\_5042031**  
( $P=3e-04$ , Diff =  $-6.44$ )  
primary auditory cortex

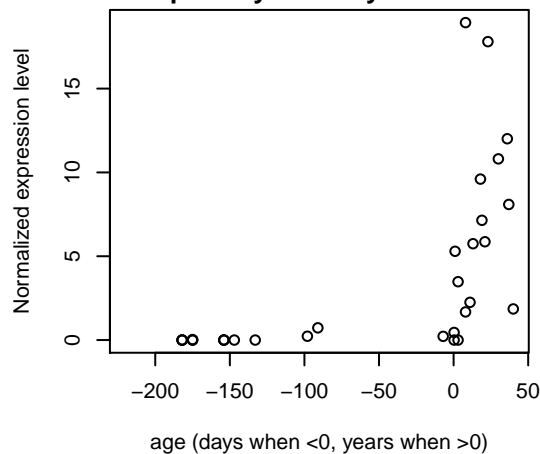

**SEC14L5\_5046348\_5046461**  
( $P=4e-04$ , Diff =  $-6.1$ )  
primary auditory cortex

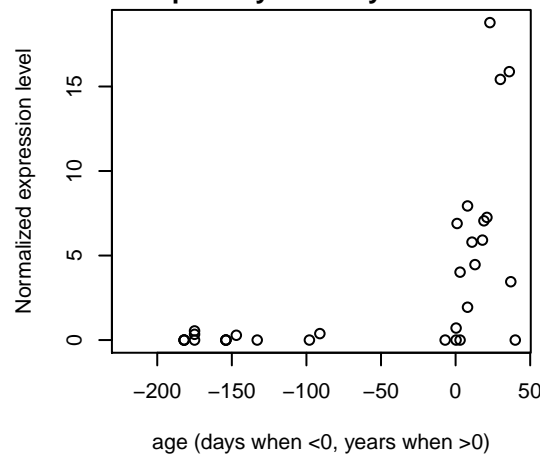

**SEC14L5\_5046855\_5047045**  
( $P=5e-04$ , Diff =  $-7.54$ )  
primary auditory cortex

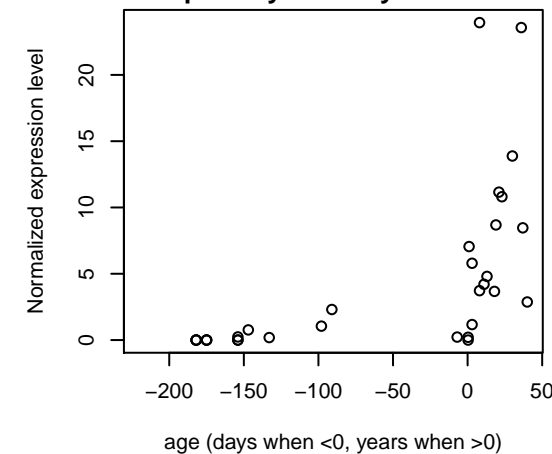

**SEC14L5\_5050655\_5050744**  
( $P=3e-04$ , Diff =  $-5.25$ )  
primary auditory cortex

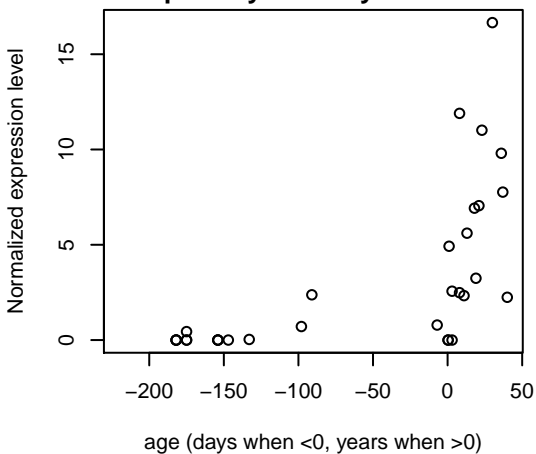

**SEC14L5\_5050855\_5050926**  
( $P=0.0038$ , Diff =  $-7.57$ )  
primary auditory cortex

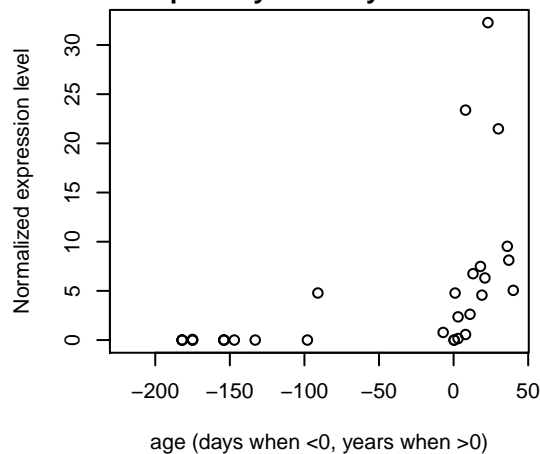

**SEC14L5\_5053402\_5053574**  
( $P=0.0022$ , Diff =  $-5.25$ )  
primary auditory cortex

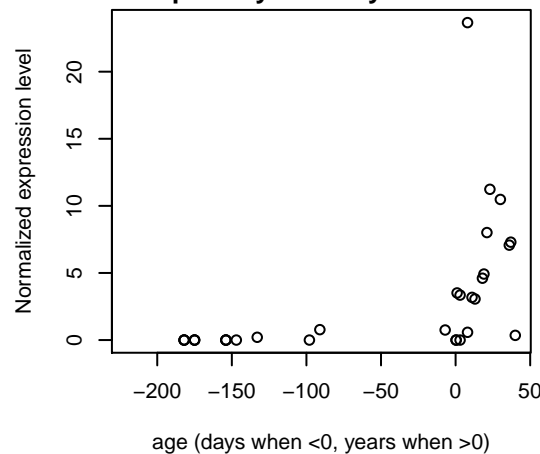

**SEC14L5\_5055914\_5056049**  
( $P=3e-04$ , Diff =  $-7.16$ )  
primary auditory cortex

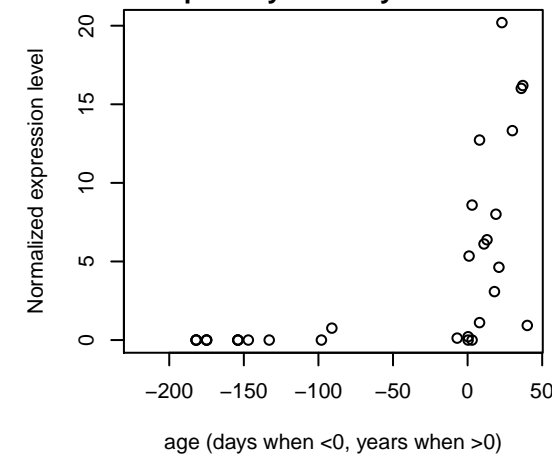

**SEC14L5\_5057352\_5057487**  
( $P=1e-04$ , Diff =  $-7.49$ )  
primary auditory cortex

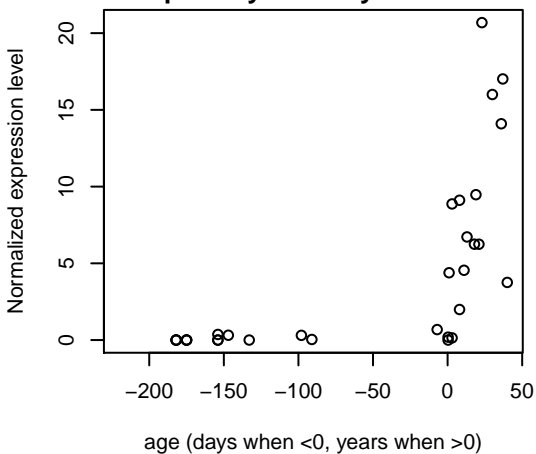

**SEC14L5\_5058421\_5058649**  
( $P=3e-04$ , Diff =  $-4.03$ )  
primary auditory cortex

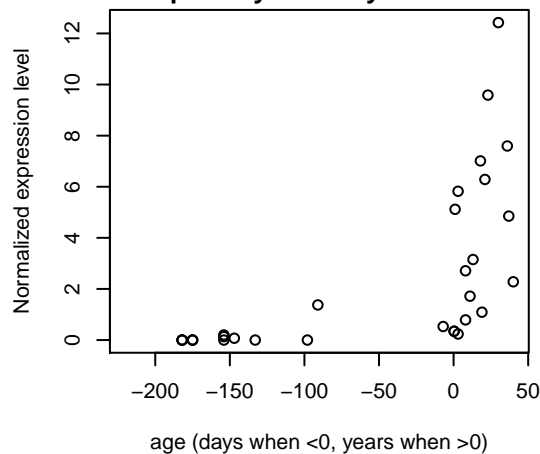

**SEC14L5\_5061095\_5061274**  
( $P=2e-04$ , Diff =  $-5.94$ )  
primary auditory cortex

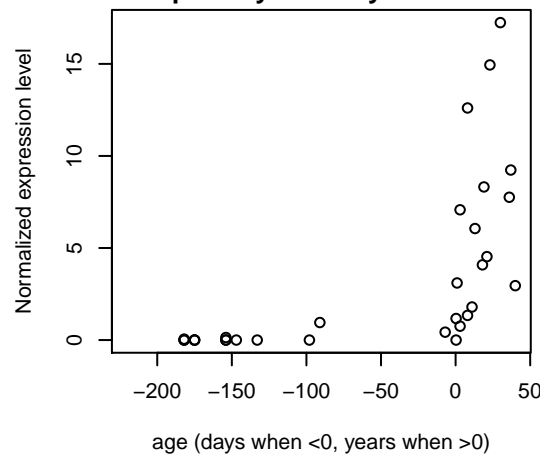

**SEC14L5\_5064859\_5069156**  
( $P=0$ , Diff =  $-11.7$ )  
primary auditory cortex

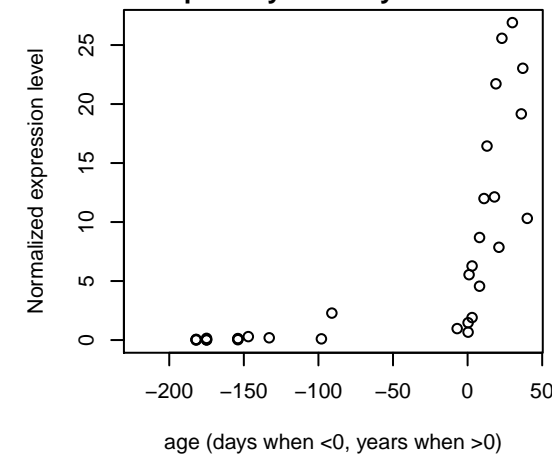



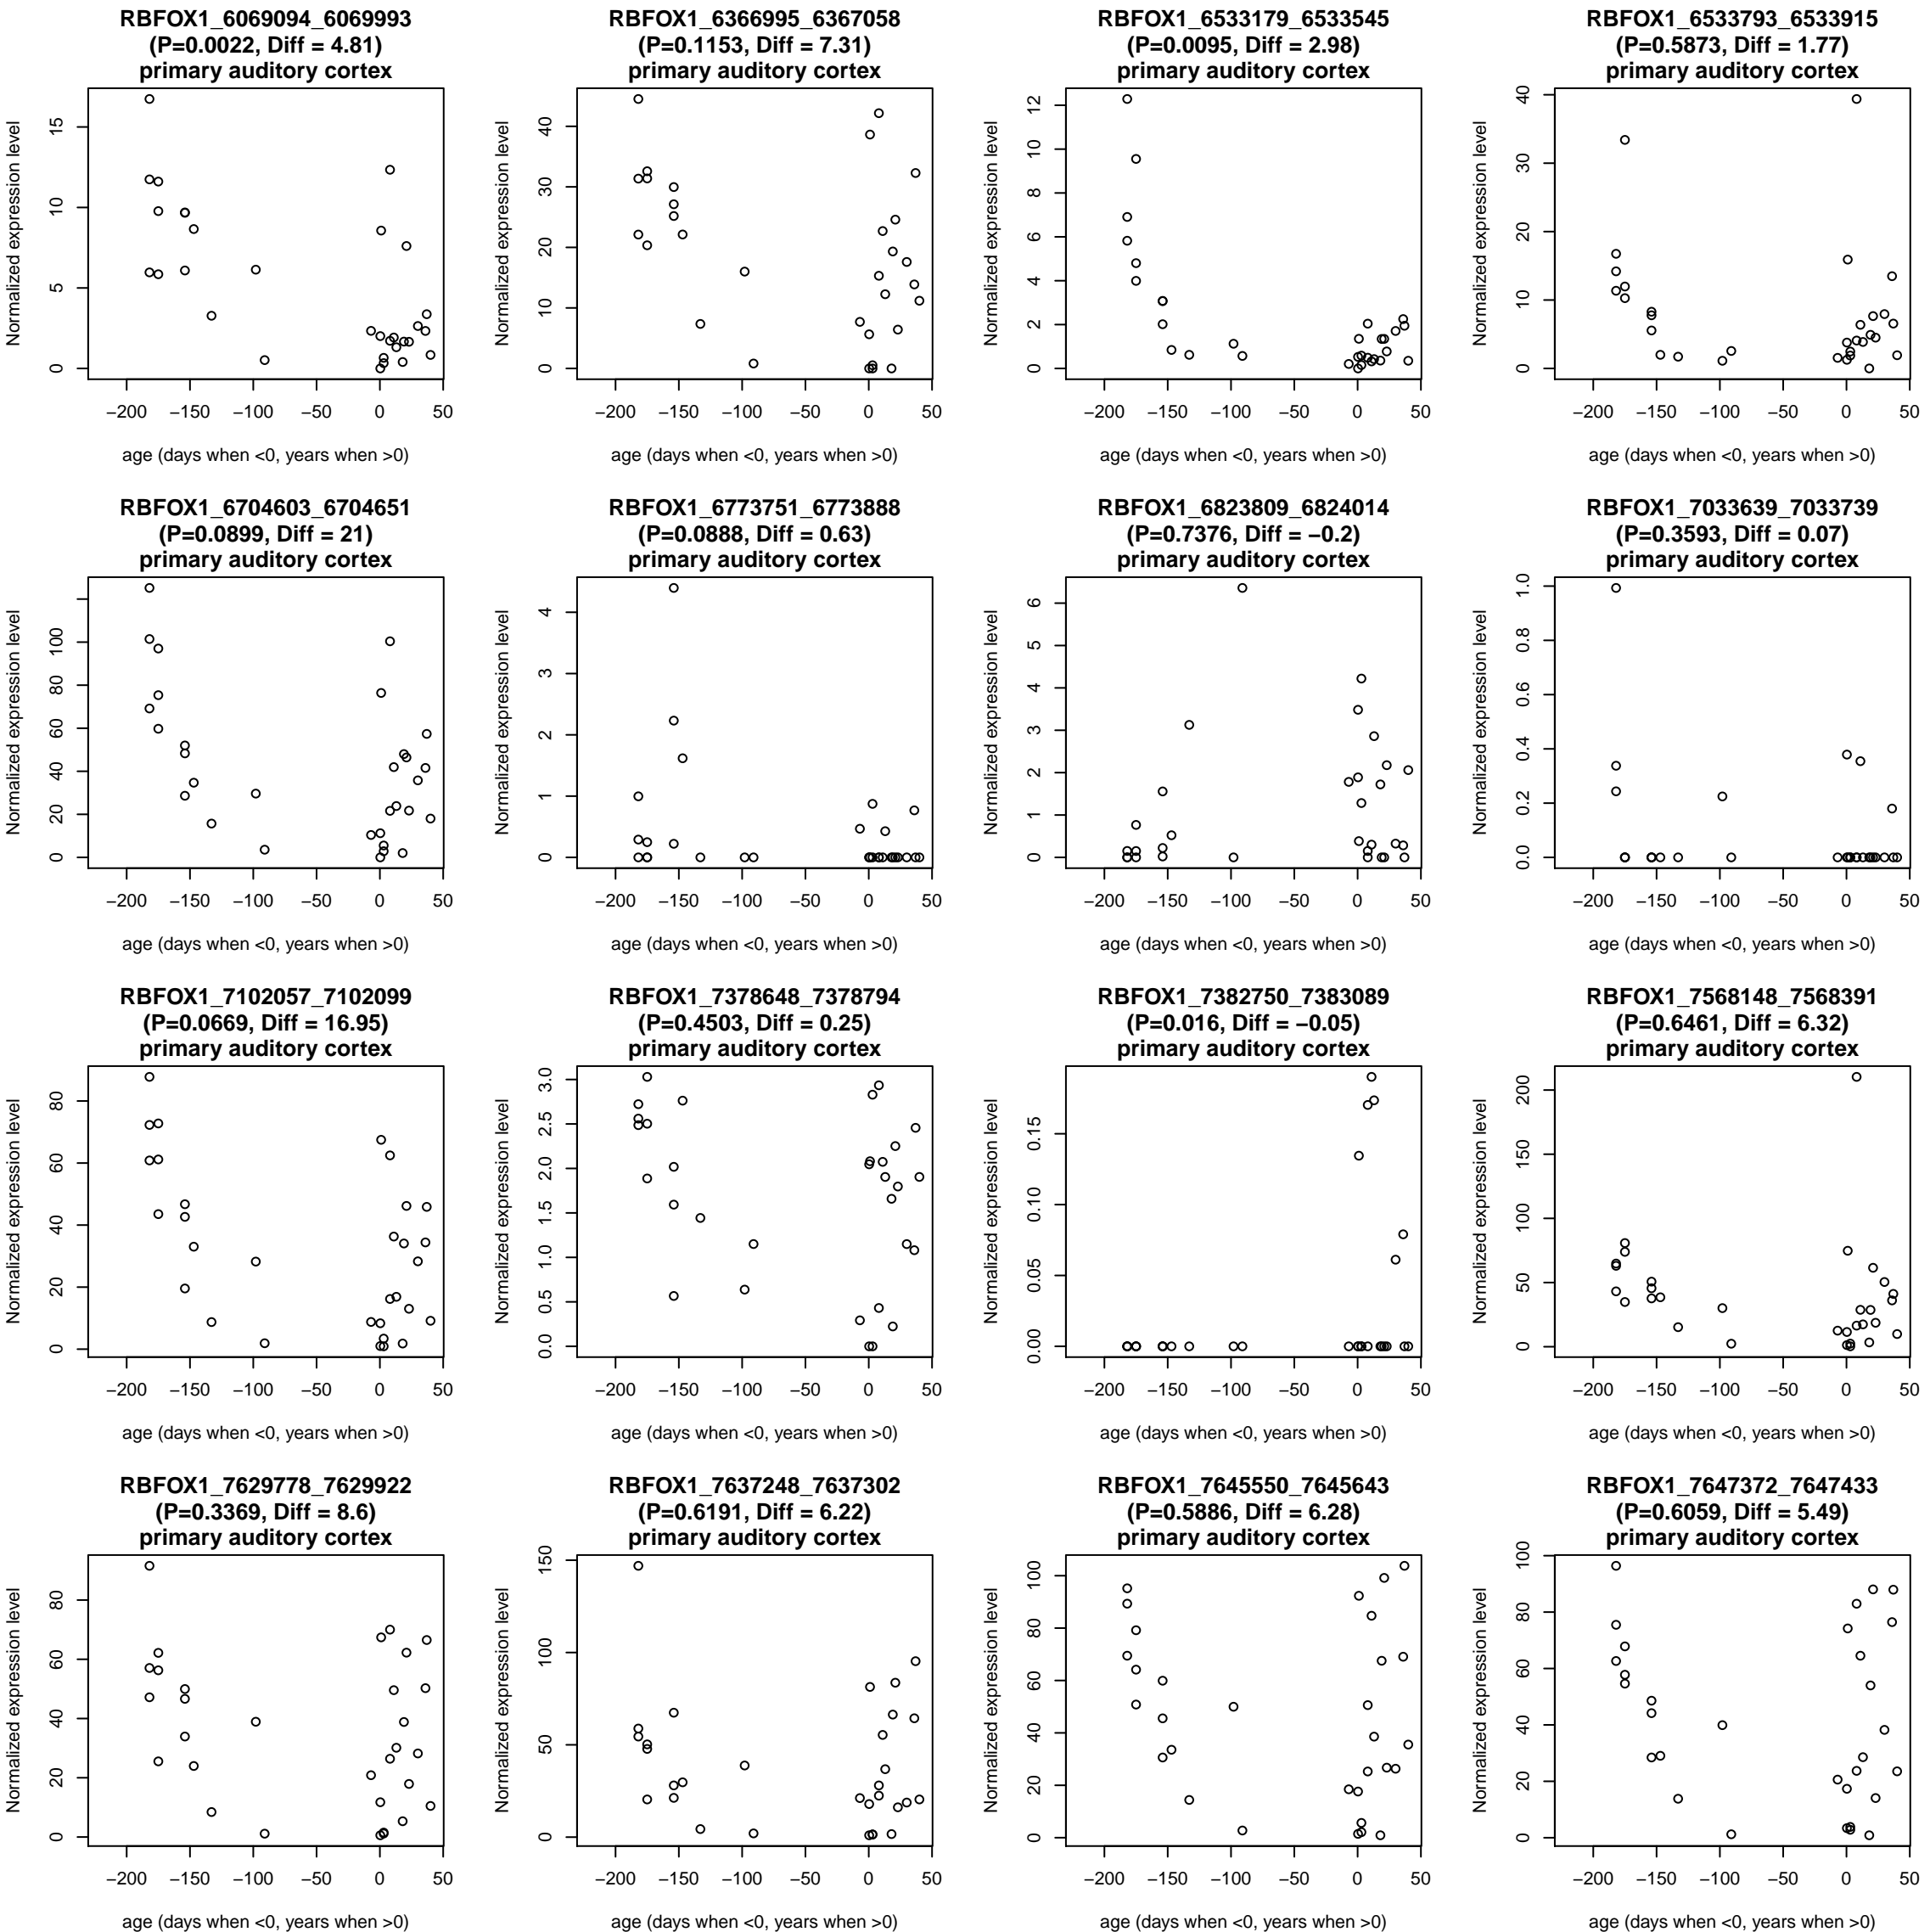

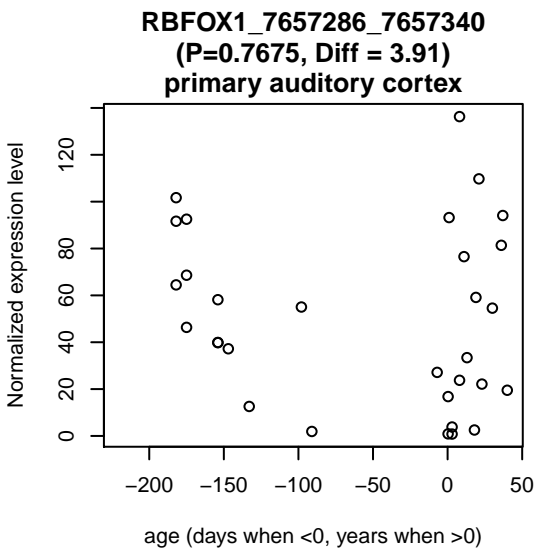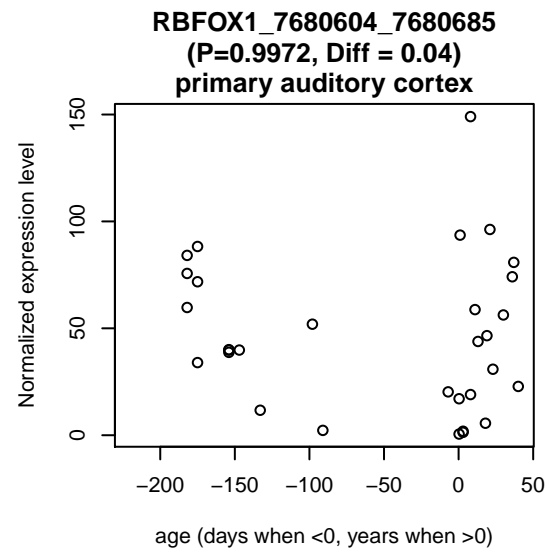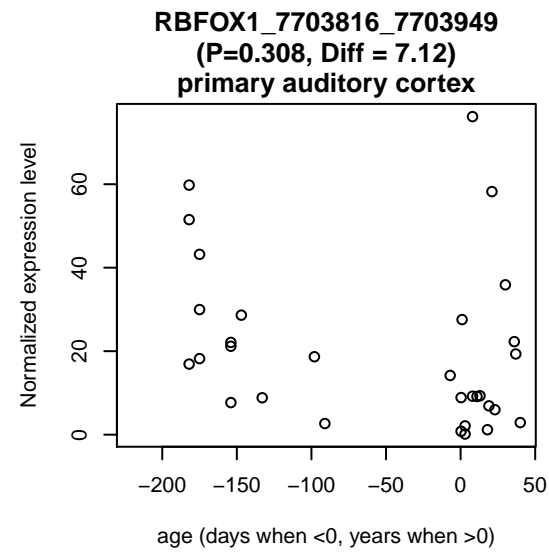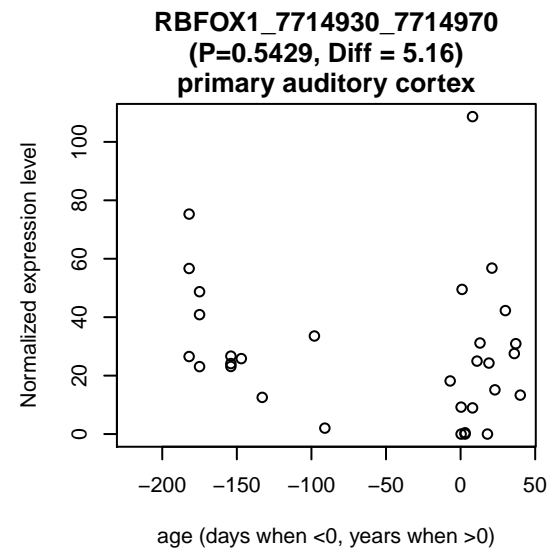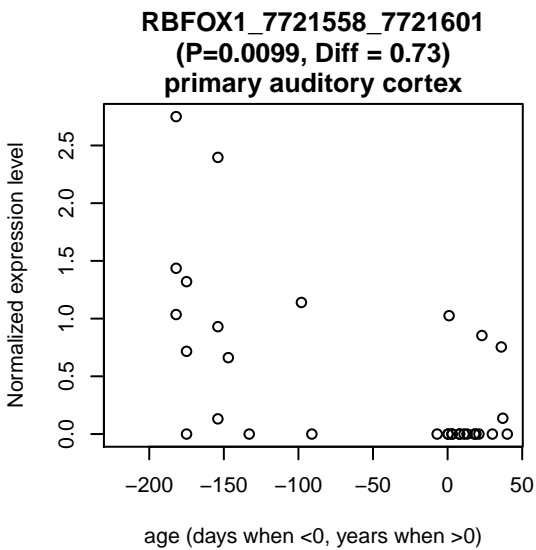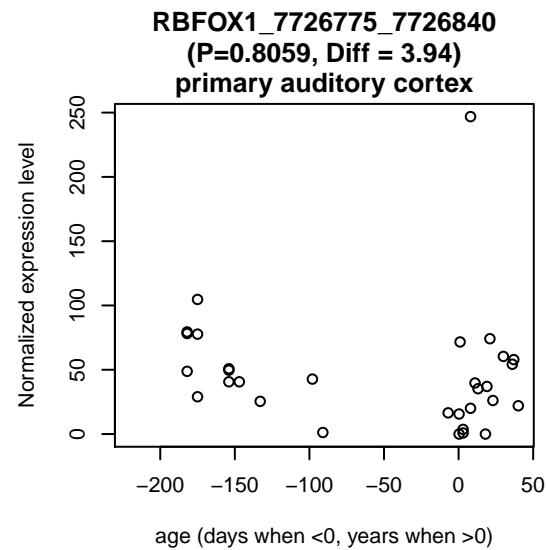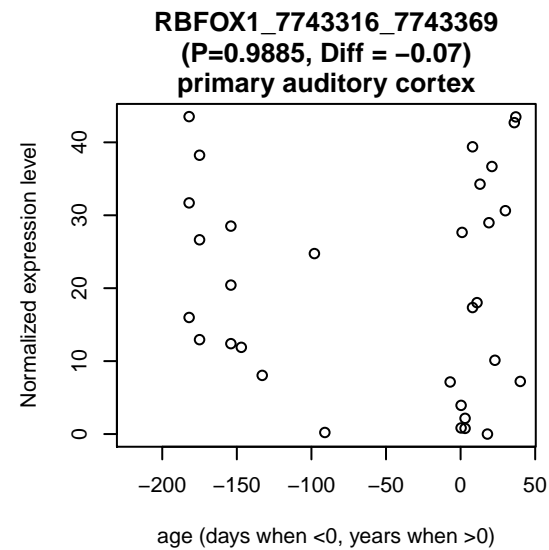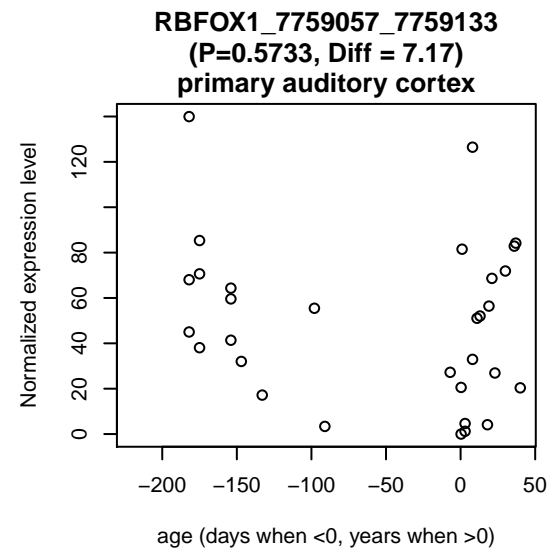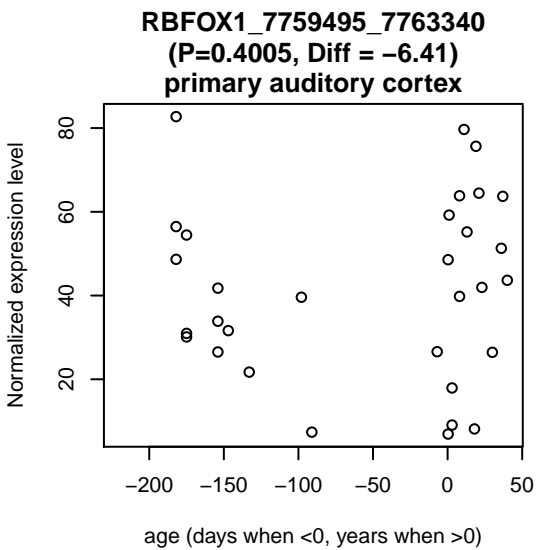

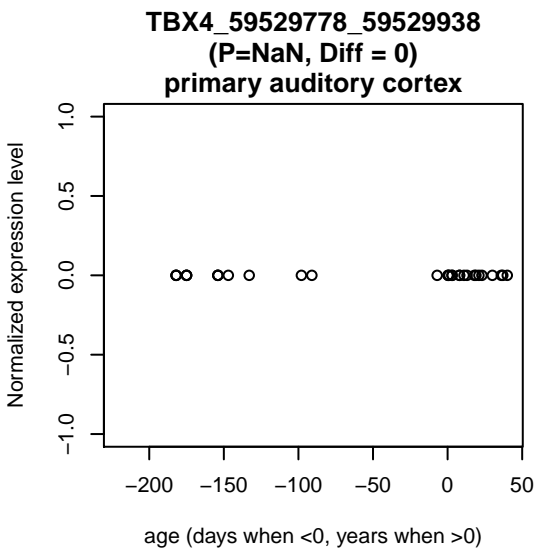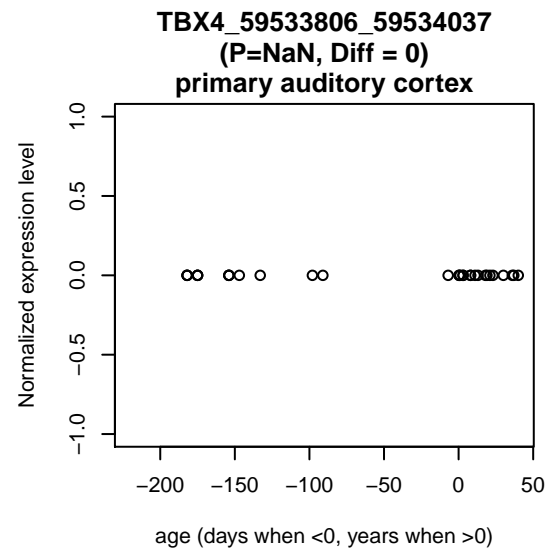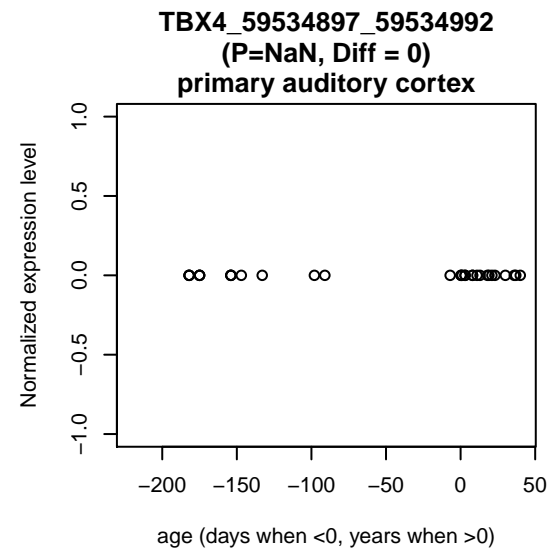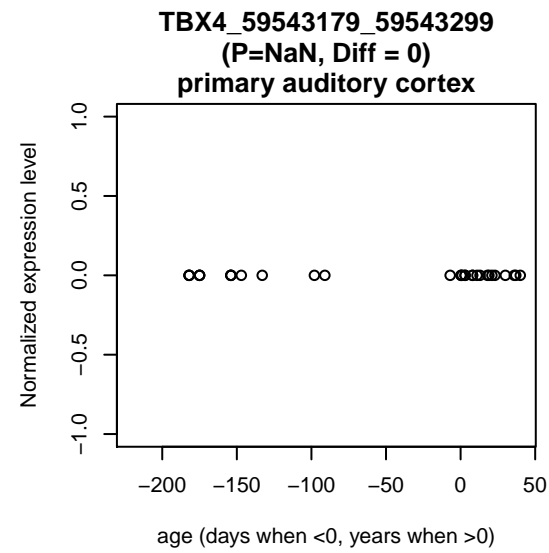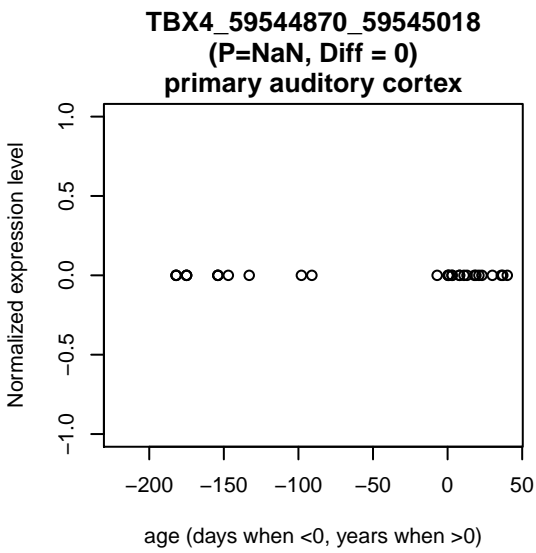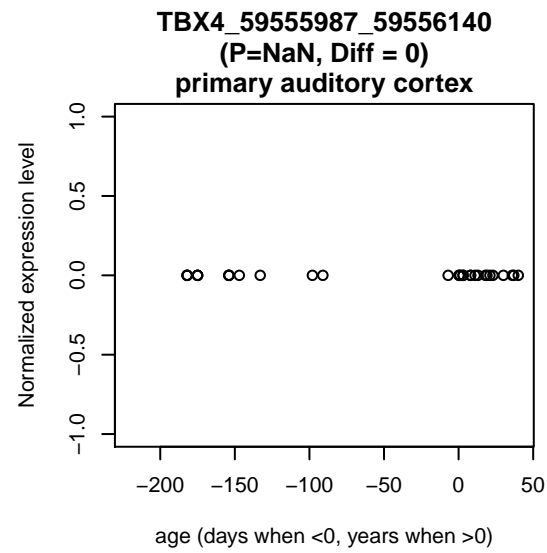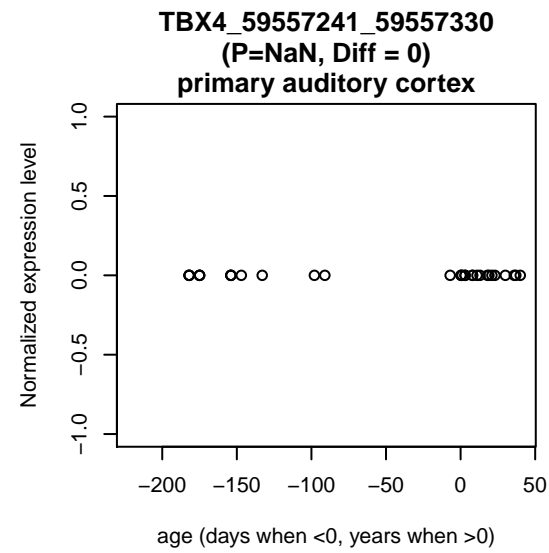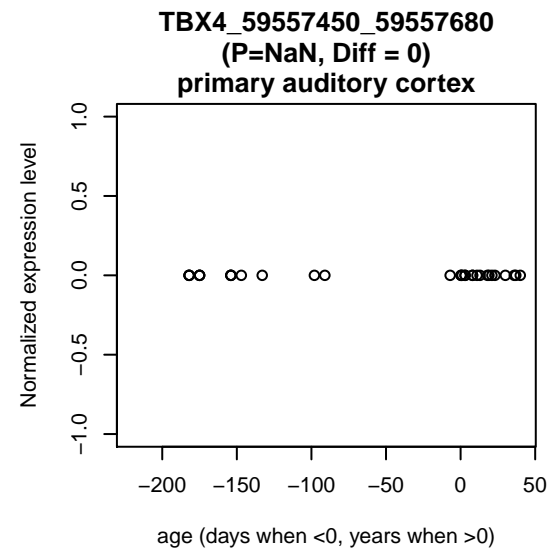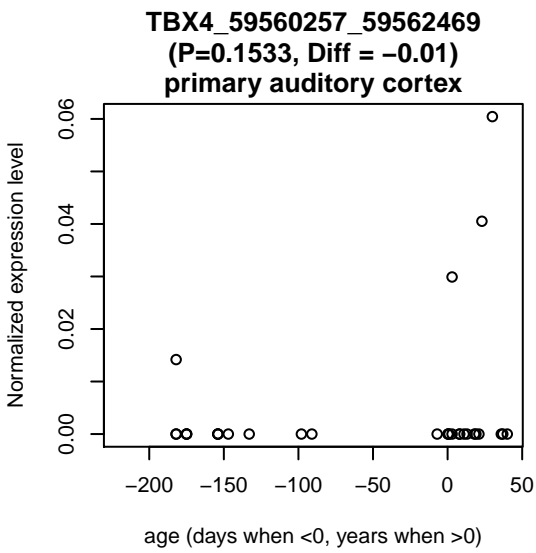

**FRG1\_190861942\_190862226**  
( $P=1e-04$ , Diff = 8.46)  
primary auditory cortex

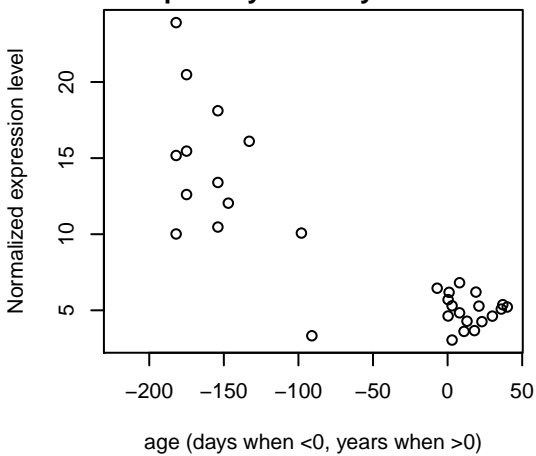

**FRG1\_190862987\_190863159**  
( $P=0.4417$ , Diff = 0.01)  
primary auditory cortex

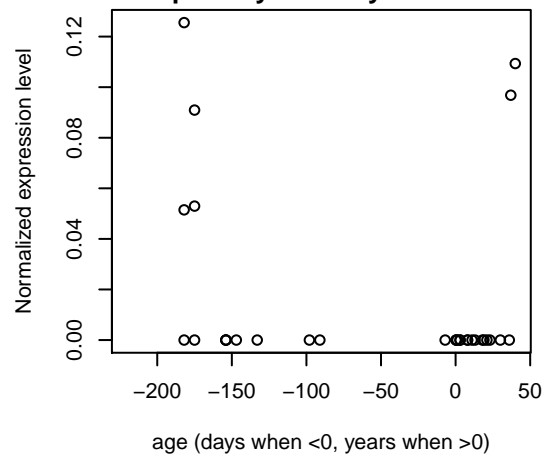

**FRG1\_190864356\_190864427**  
( $P=3e-04$ , Diff = 9.13)  
primary auditory cortex

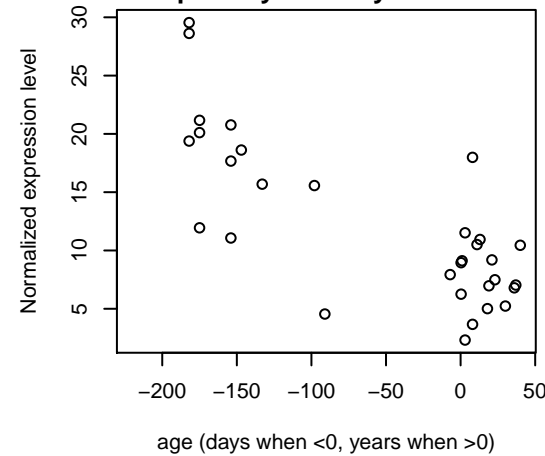

**FRG1\_190873316\_190873442**  
( $P=0.0012$ , Diff = 19.62)  
primary auditory cortex

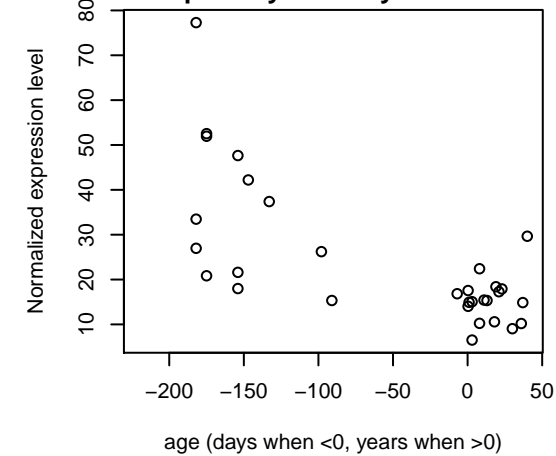

**FRG1\_190874222\_190874280**  
( $P=6e-04$ , Diff = 9.93)  
primary auditory cortex

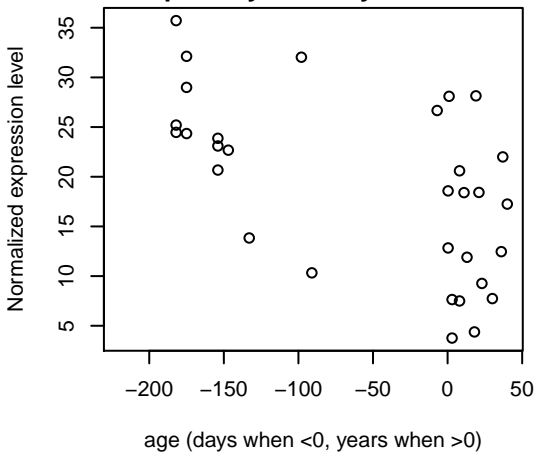

**FRG1\_190876191\_190876306**  
( $P=0.0061$ , Diff = 13.06)  
primary auditory cortex

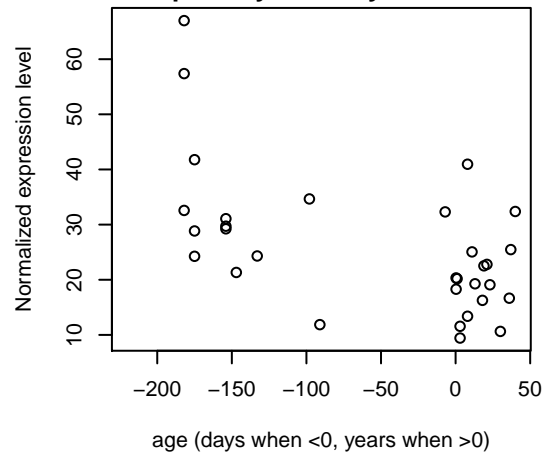

**FRG1\_190878552\_190878657**  
( $P=0.1069$ , Diff = 3.28)  
primary auditory cortex

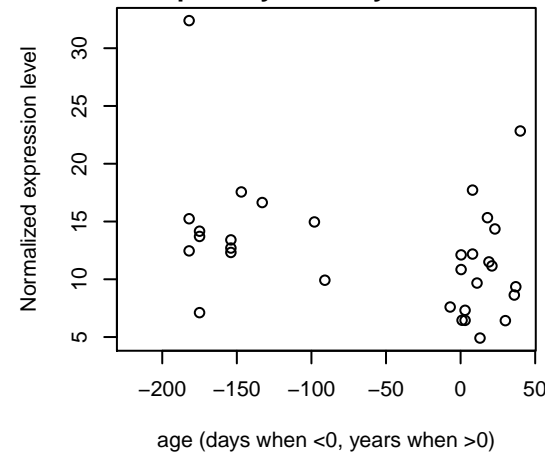

**FRG1\_190881902\_190881994**  
( $P=0.3295$ , Diff = 2.22)  
primary auditory cortex

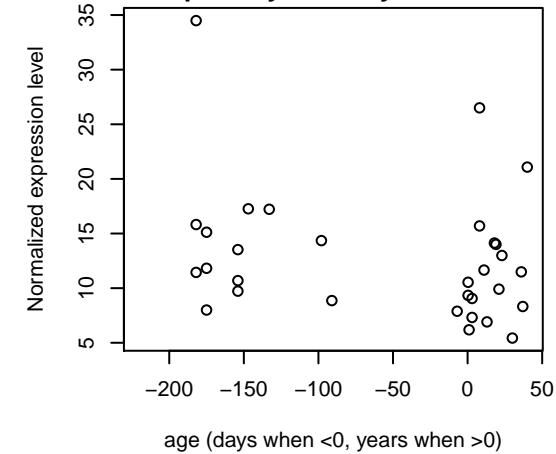

**FRG1\_190882016\_190882355**  
( $P=0.5163$ , Diff = 0.1)  
primary auditory cortex

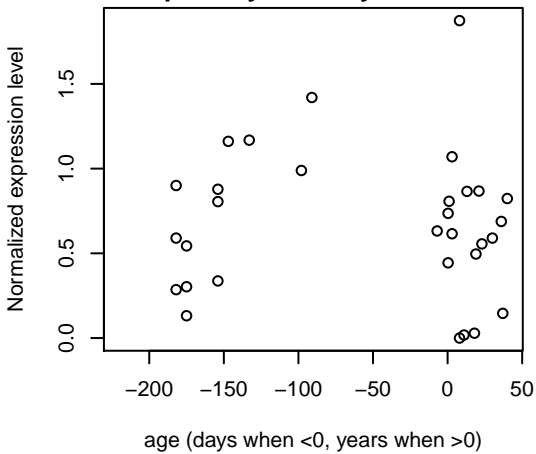

**FRG1\_190882583\_190882705**  
( $P=0.1297$ , Diff = 0.16)  
primary auditory cortex

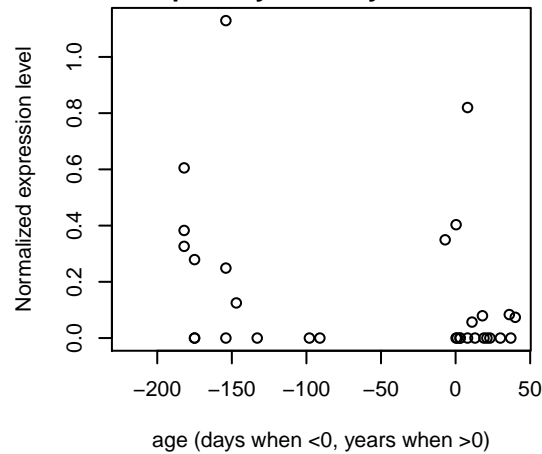

**FRG1\_190882976\_190883087**  
( $P=0.0368$ , Diff = 11.79)  
primary auditory cortex

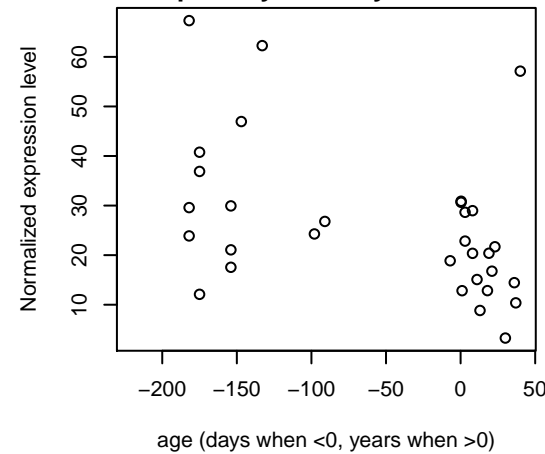

**FRG1\_190884247\_190884359**  
( $P=0.1889$ , Diff = 4.77)  
primary auditory cortex

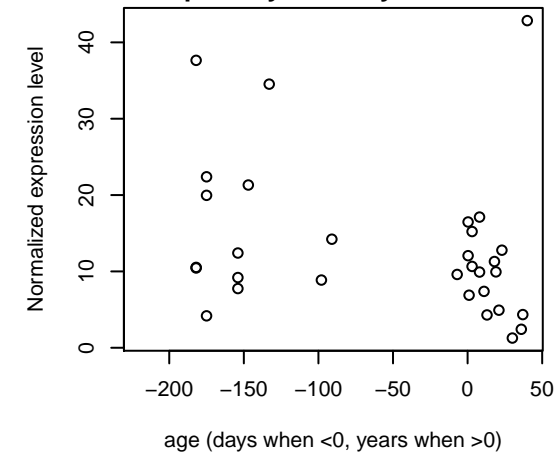

**METTL4\_2537523\_2539144**  
(P=0.0257, Diff = -0.69)  
primary auditory cortex

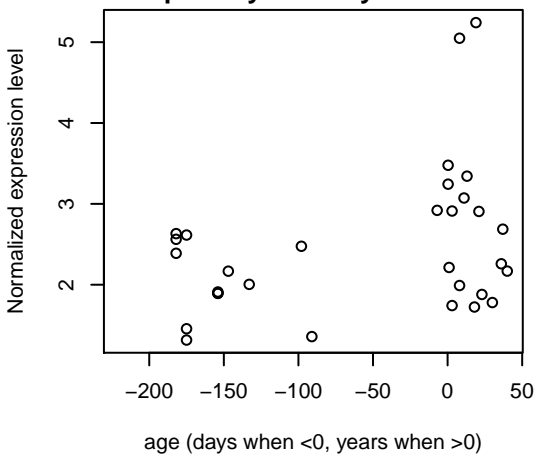

**METTL4\_2544193\_2544285**  
(P=0.4565, Diff = 0.36)  
primary auditory cortex

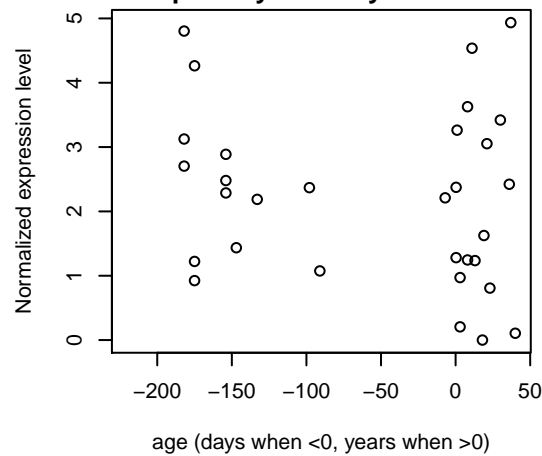

**METTL4\_2544651\_2544758**  
(P=0.8683, Diff = -0.07)  
primary auditory cortex

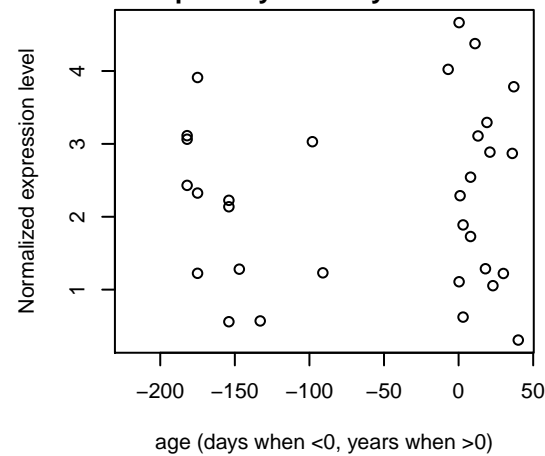

**METTL4\_2547353\_2547528**  
(P=0.9648, Diff = 0.02)  
primary auditory cortex

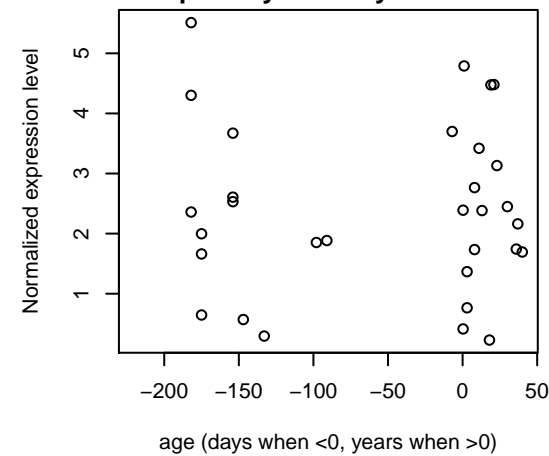

**METTL4\_2552693\_2552763**  
(P=0.598, Diff = 0.25)  
primary auditory cortex

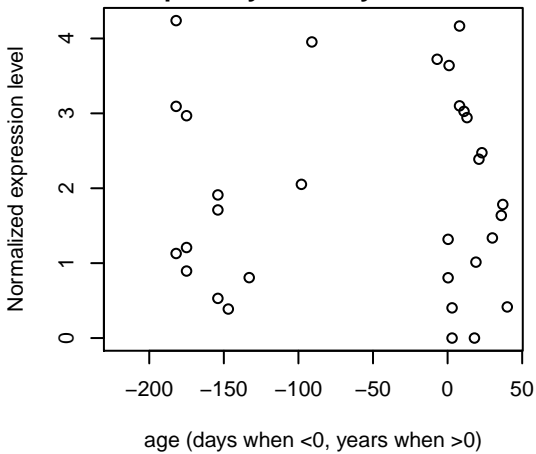

**METTL4\_2554667\_2555037**  
(P=0.4116, Diff = 0.35)  
primary auditory cortex

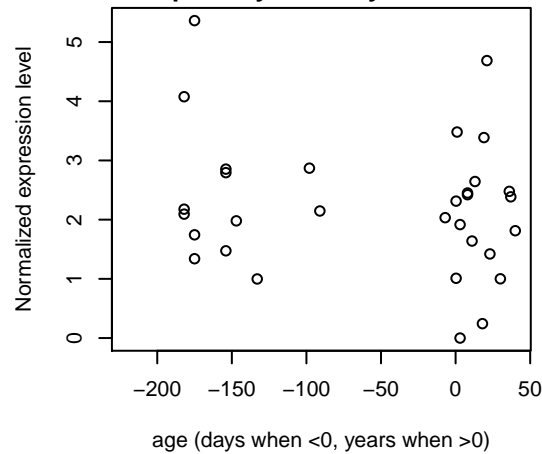

**METTL4\_2563795\_2563858**  
(P=0.125, Diff = 0.74)  
primary auditory cortex

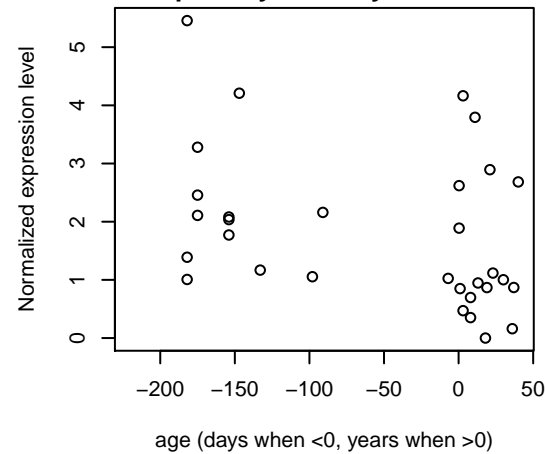

**METTL4\_2566819\_2567653**  
(P=0.0052, Diff = 0.89)  
primary auditory cortex

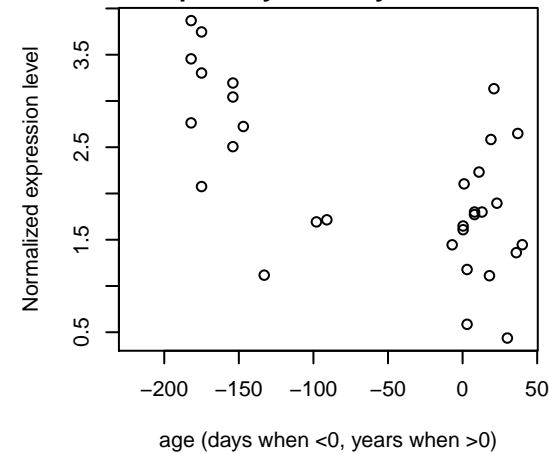

**METTL4\_2571147\_2571508**  
(P=0.3097, Diff = 0.32)  
primary auditory cortex

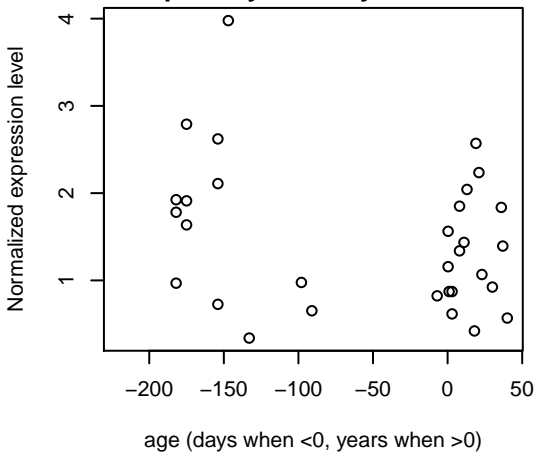

**C7orf11\_40172341\_40172858**  
(P=0.0363, Diff = 3.9)  
primary auditory cortex

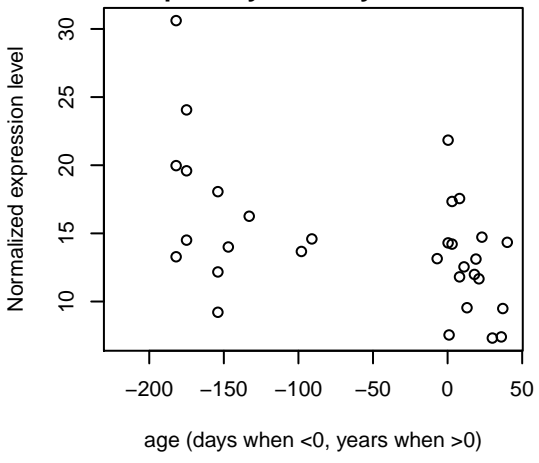

**C7orf11\_40173827\_40174258**  
(P=0.0024, Diff = 6.78)  
primary auditory cortex

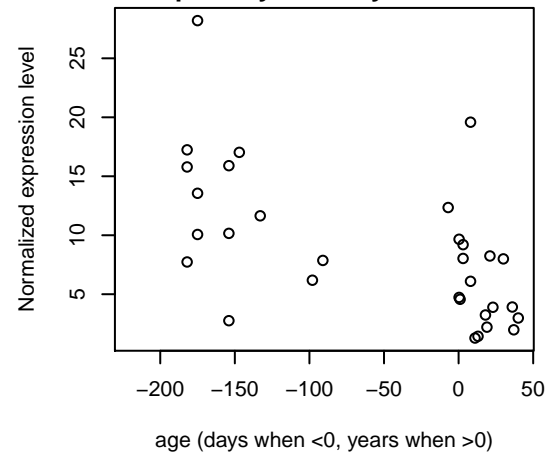

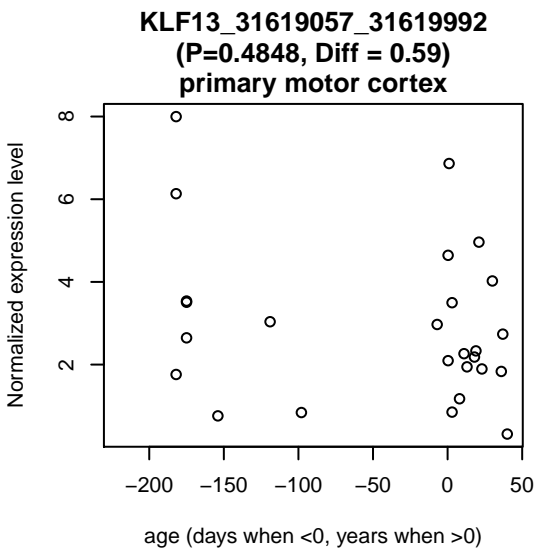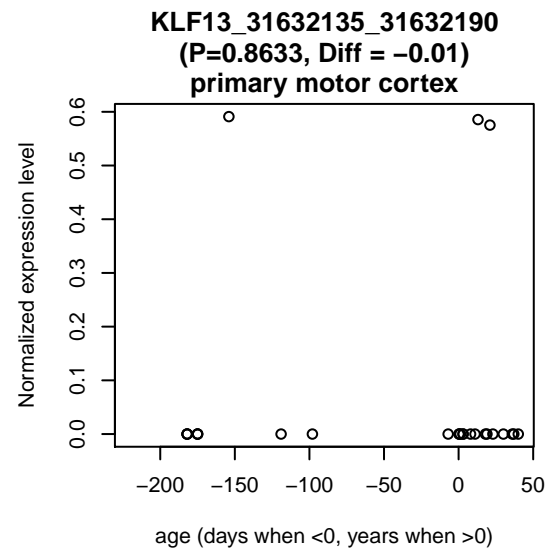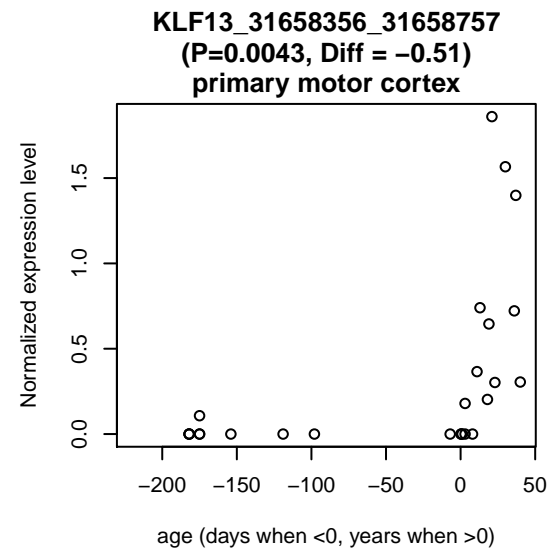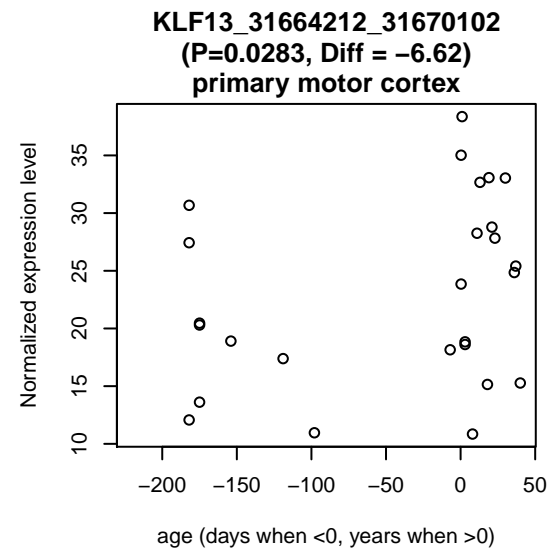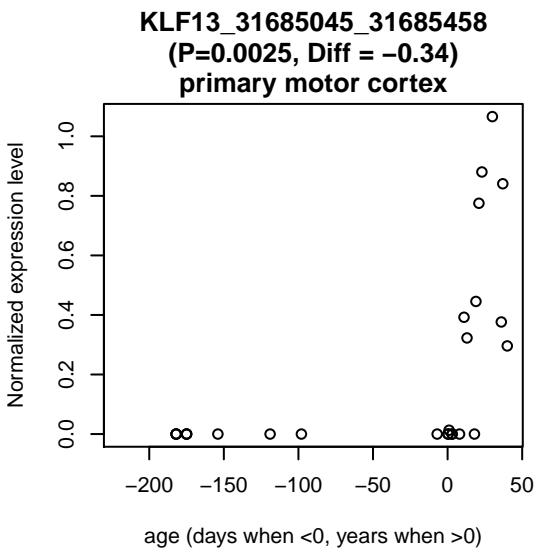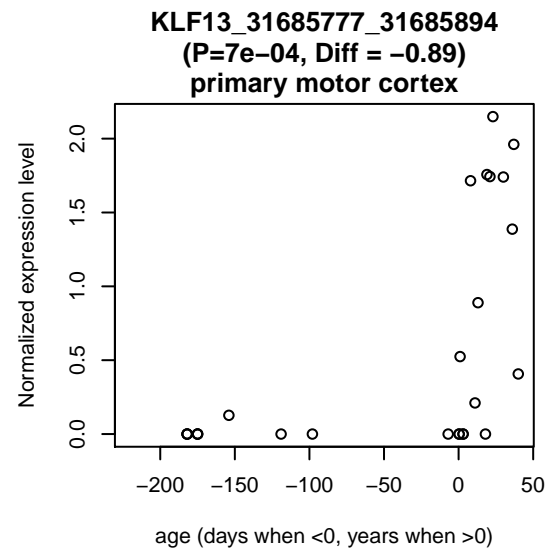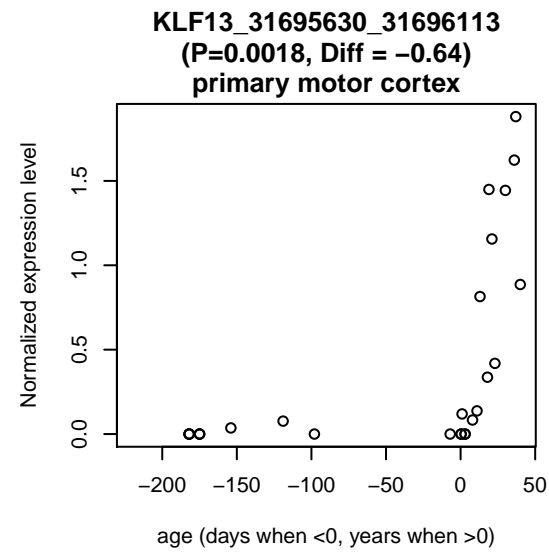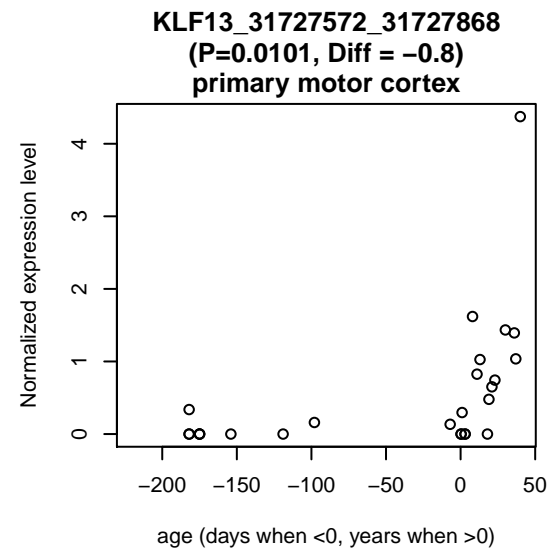

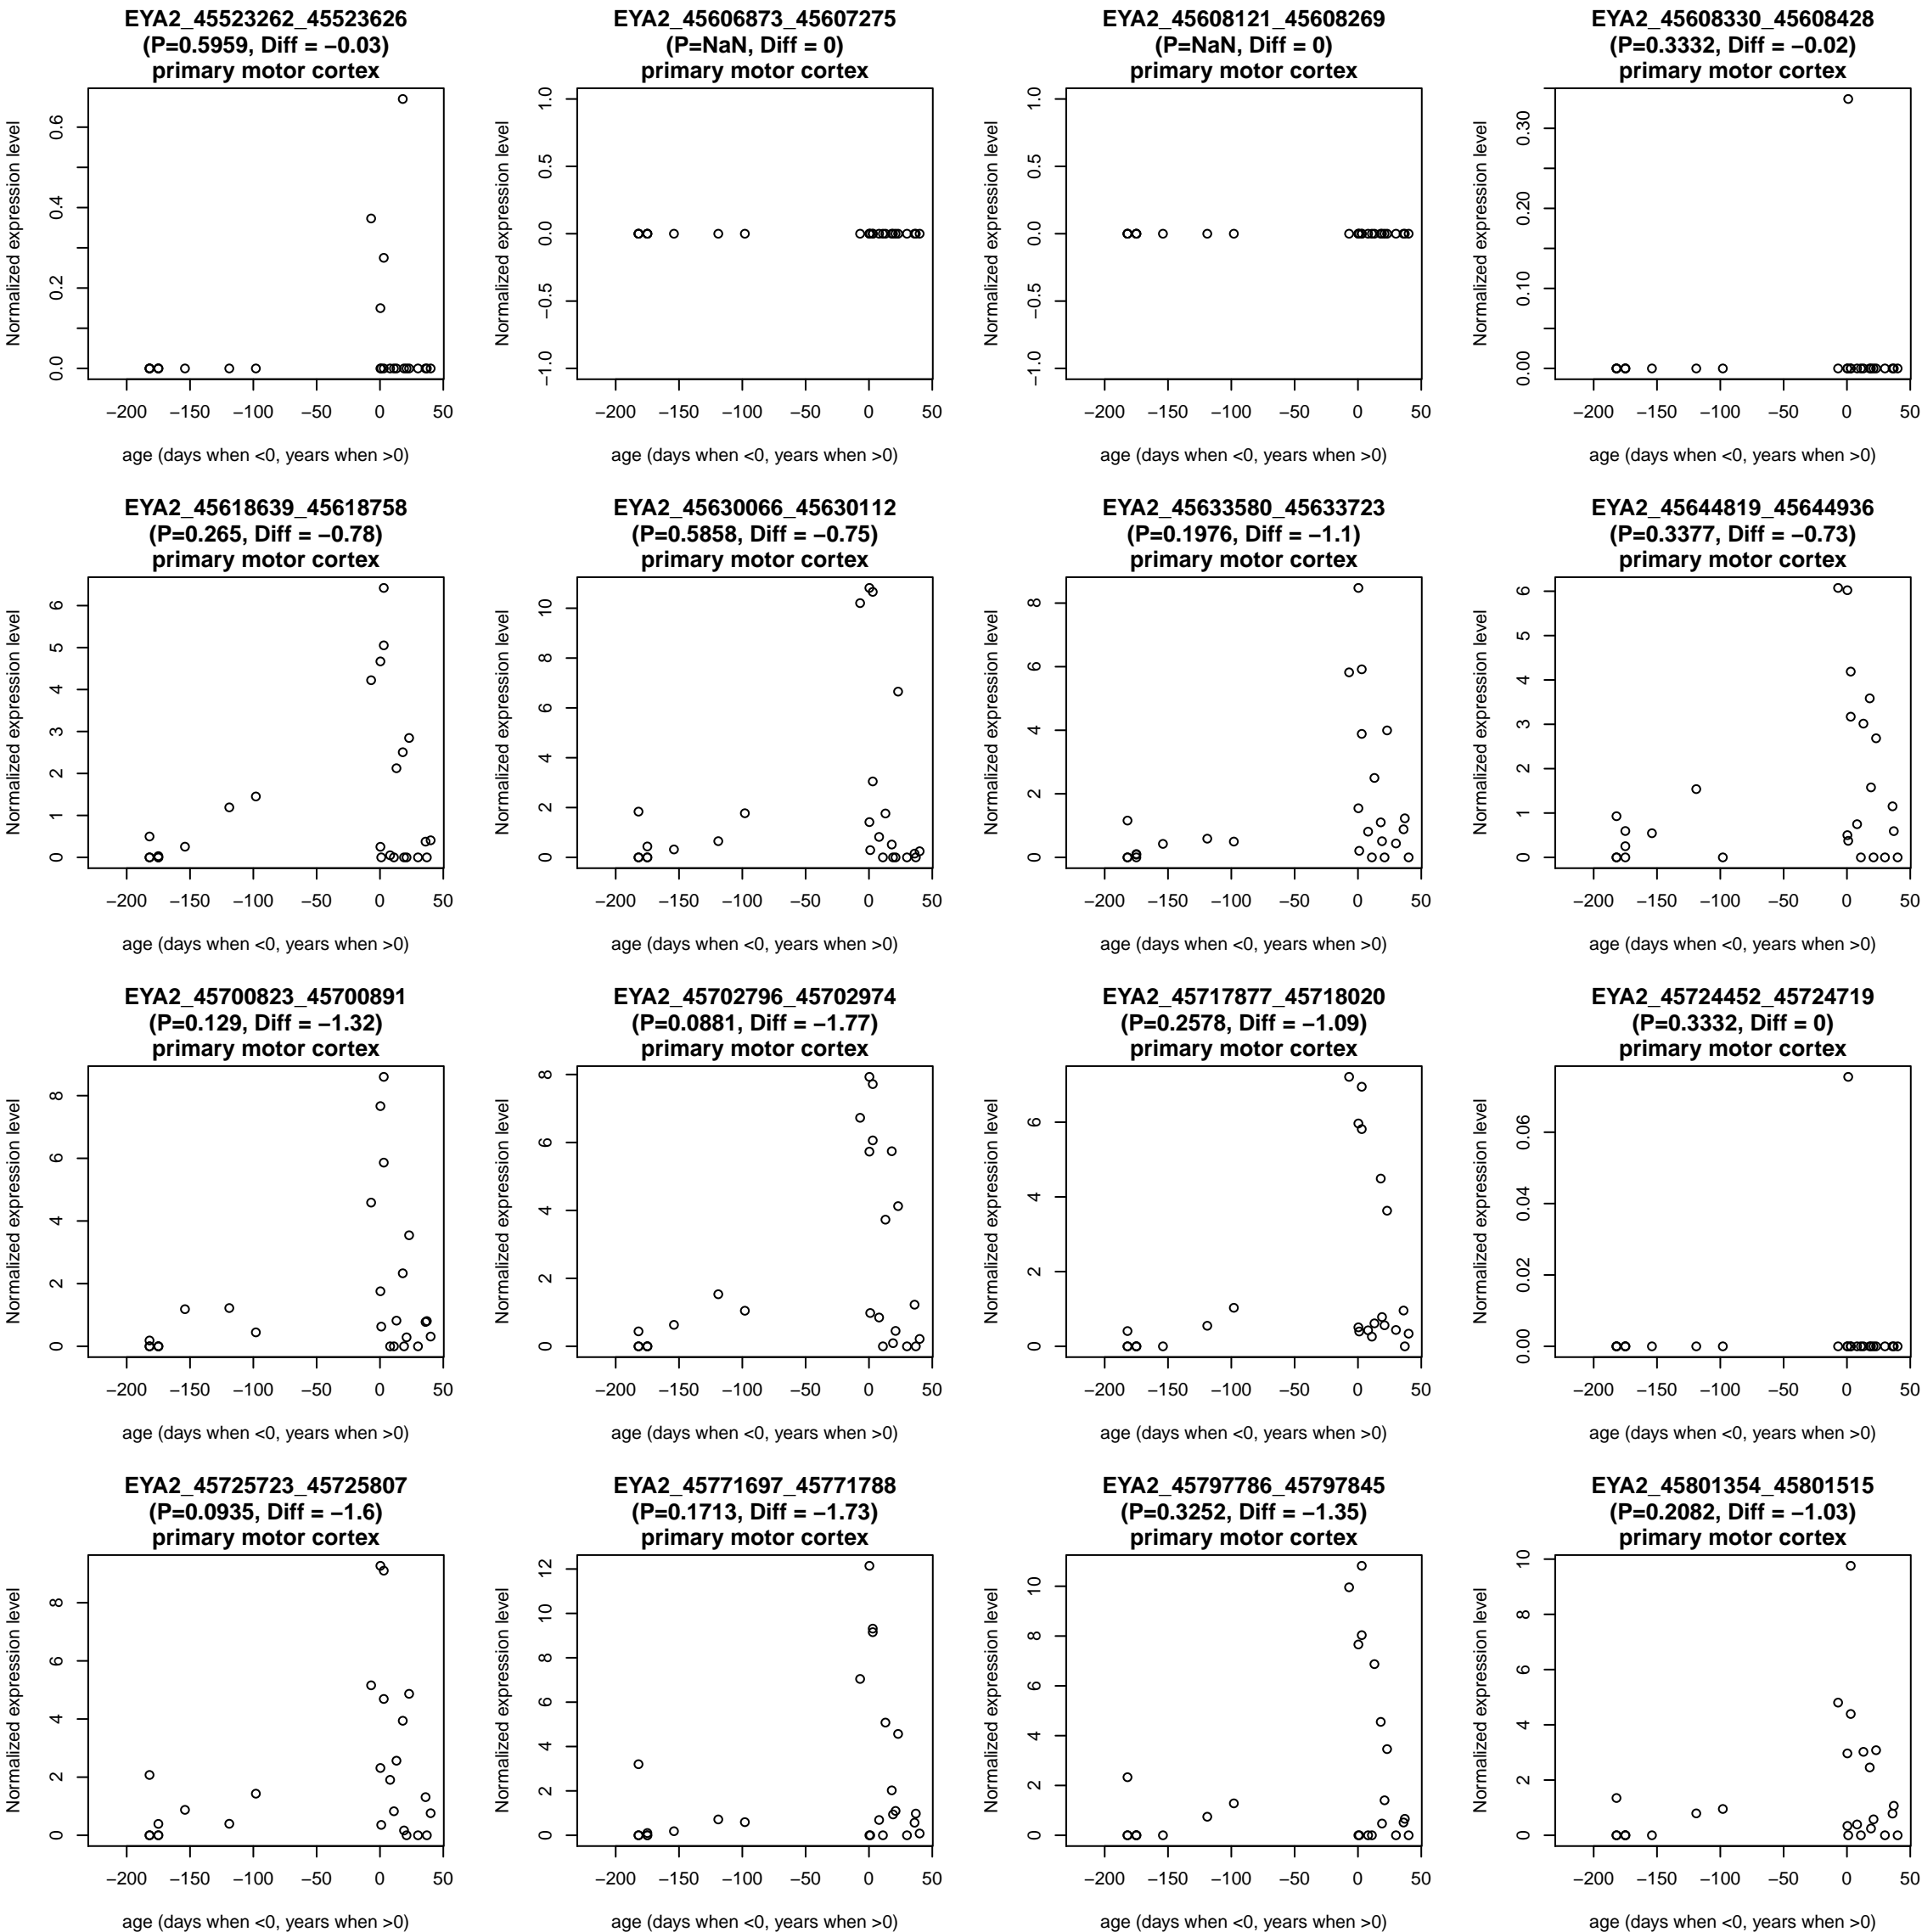



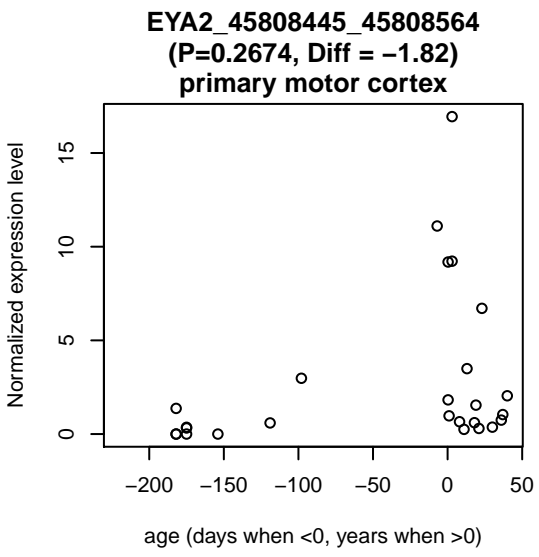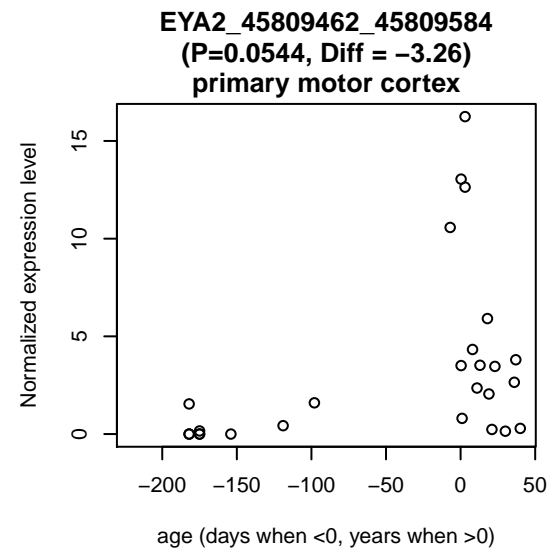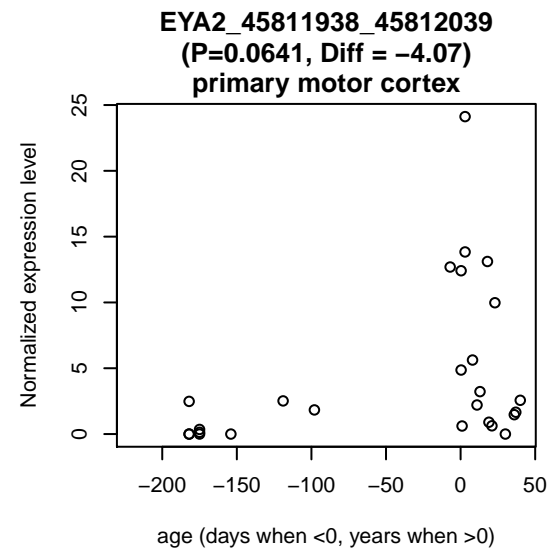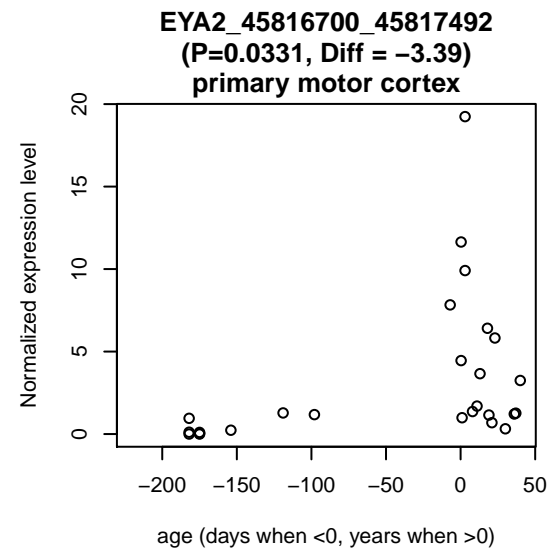

**LMCD1\_8543392\_8543666**  
(P=0.9703, Diff = 0.02)  
primary motor cortex

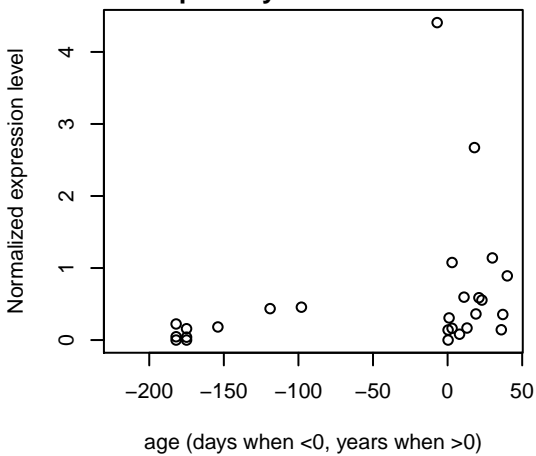

**LMCD1\_8556610\_8556681**  
(P=0.0255, Diff = -0.18)  
primary motor cortex

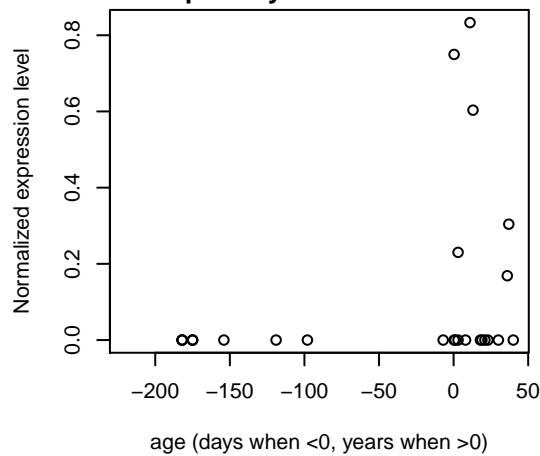

**LMCD1\_8574422\_8574511**  
(P=0.4637, Diff = -1.45)  
primary motor cortex

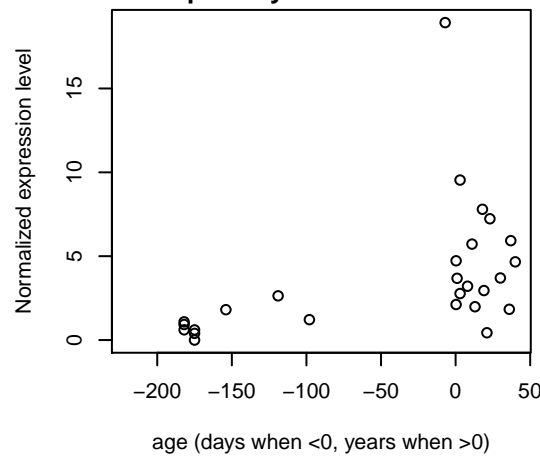

**LMCD1\_8578868\_8579204**  
(P=0.5456, Diff = -0.97)  
primary motor cortex

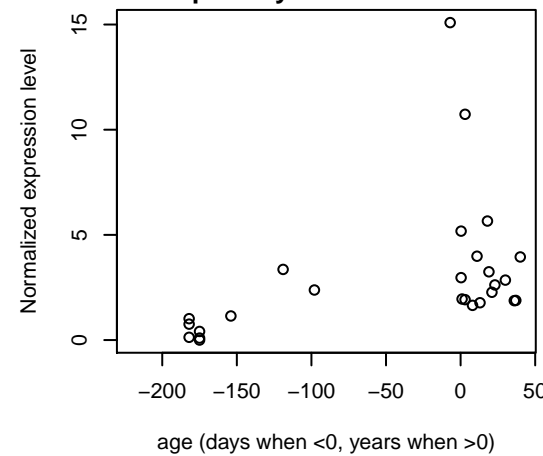

**LMCD1\_8590253\_8590589**  
(P=0.8597, Diff = -0.38)  
primary motor cortex

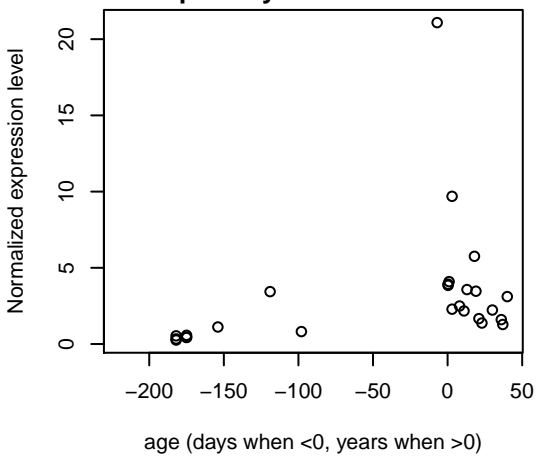

**LMCD1\_8591559\_8592135**  
(P=0.89, Diff = -0.01)  
primary motor cortex

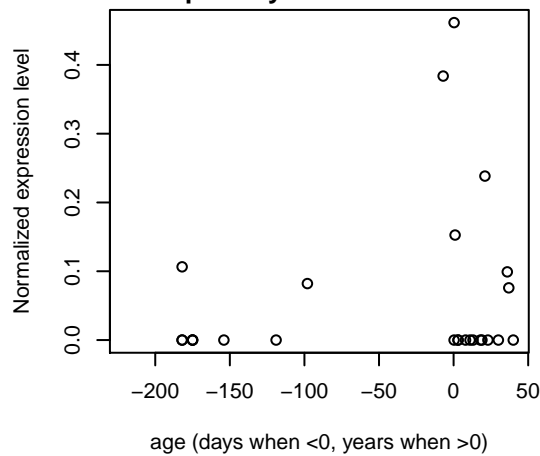

**LMCD1\_8607117\_8607333**  
(P=0.9787, Diff = -0.05)  
primary motor cortex

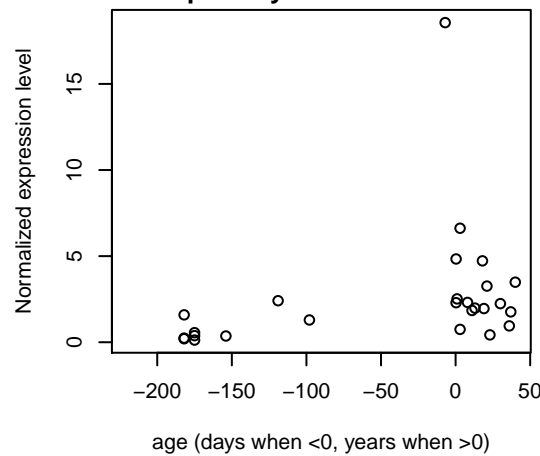

**LMCD1\_8609125\_8609805**  
(P=0.1106, Diff = -2.48)  
primary motor cortex

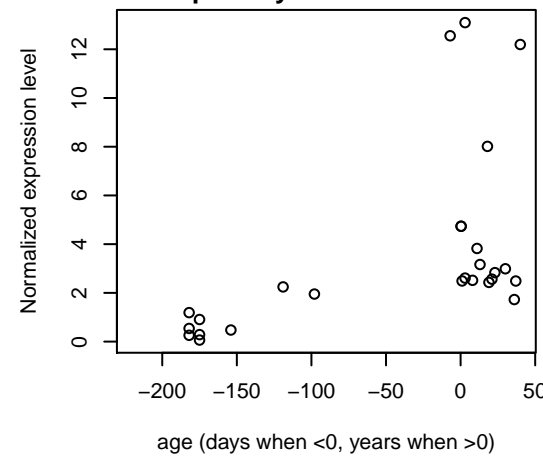

**WVOX\_78133550\_78133782**  
(P=0.1086, Diff = -1.34)  
primary motor cortex

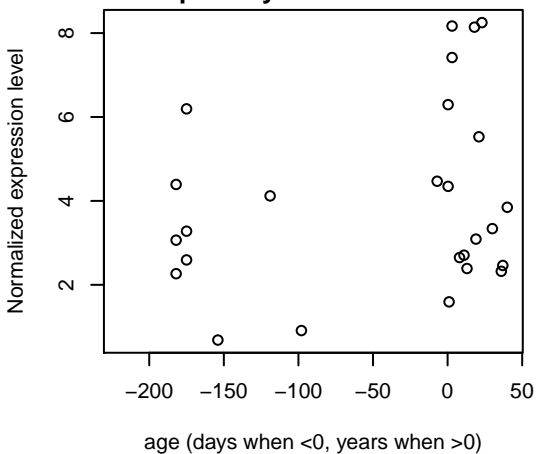

**WVOX\_78142319\_78142384**  
(P=0.5978, Diff = -0.56)  
primary motor cortex

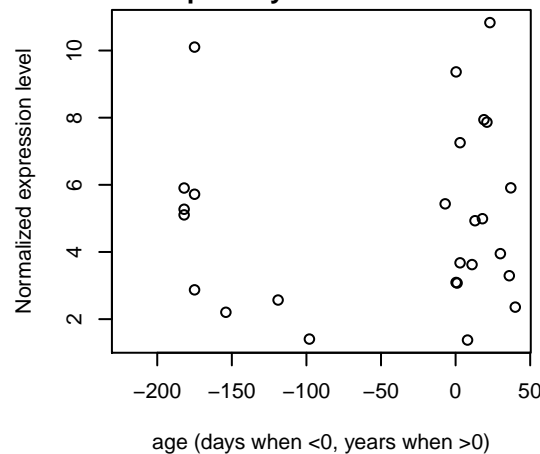

**WVOX\_78143674\_78143732**  
(P=0.9214, Diff = -0.1)  
primary motor cortex

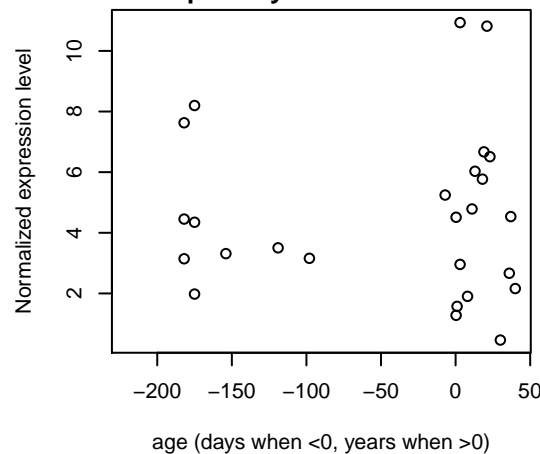

**WVOX\_78148872\_78149051**  
(P=0.0215, Diff = -1.55)  
primary motor cortex

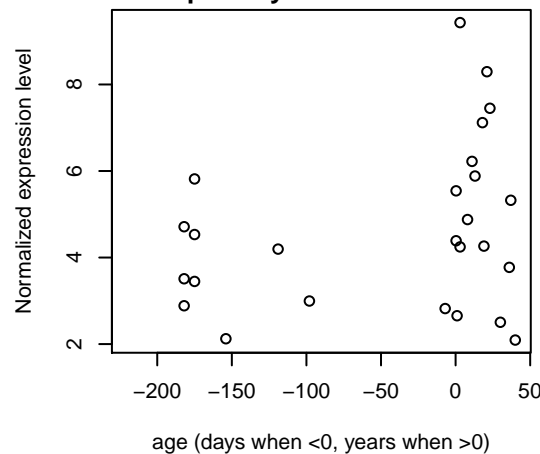

**WVOX\_78198079\_78198186**  
(P=3e-04, Diff = -3.11)  
primary motor cortex

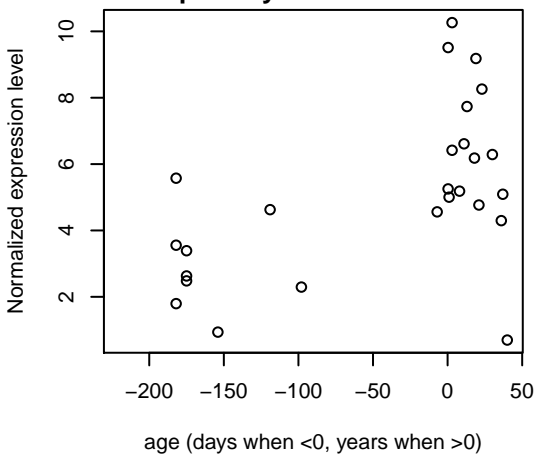

**WVOX\_78312499\_78312593**  
(P=0.2739, Diff = 0.04)  
primary motor cortex

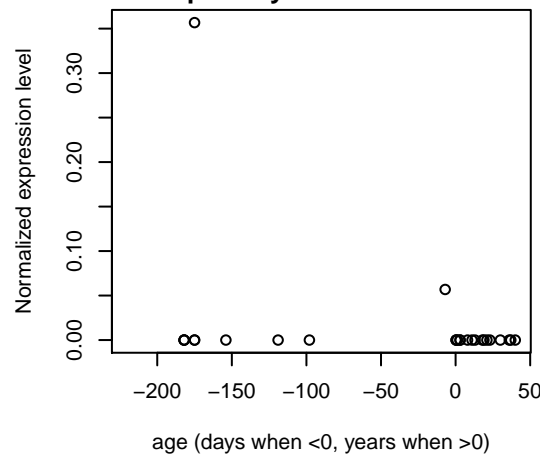

**WVOX\_78420756\_78420845**  
(P=0.0037, Diff = -3.51)  
primary motor cortex

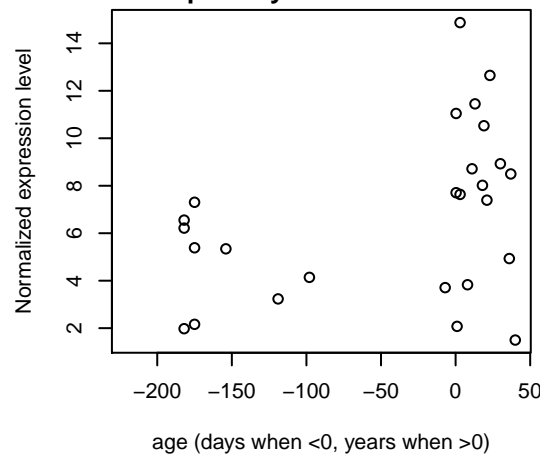

**WVOX\_78458766\_78458952**  
(P=0.001, Diff = -3.94)  
primary motor cortex

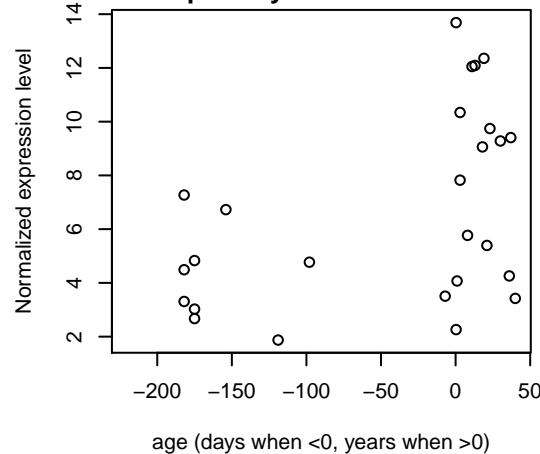

**WVOX\_78466384\_78466649**  
(P=0.0017, Diff = -2.58)  
primary motor cortex

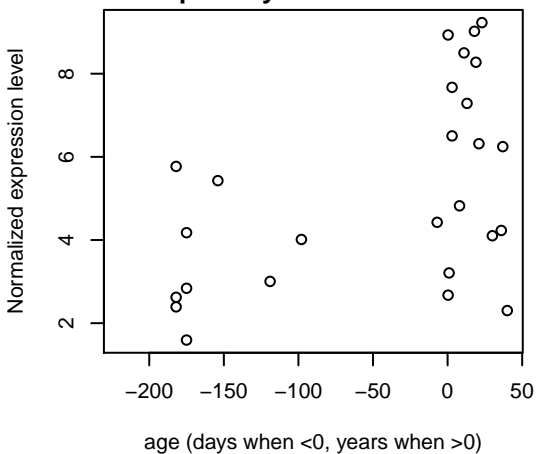

**WVOX\_78790836\_78790912**  
(P=0.1243, Diff = -0.08)  
primary motor cortex

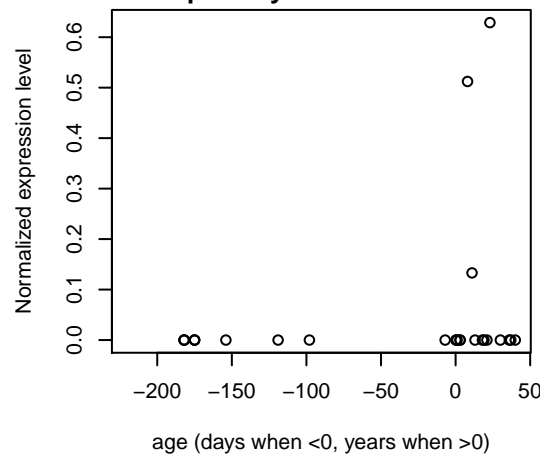

**WVOX\_79245504\_79246031**  
(P=2e-04, Diff = -3.8)  
primary motor cortex

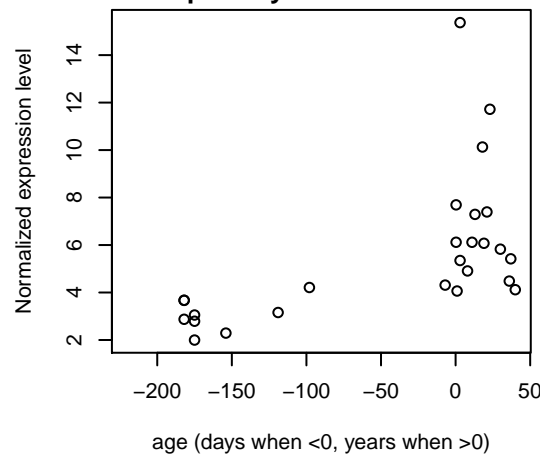

**SLC13A3\_45186462\_45188837**  
( $P=1e-04$ , Diff = -3.02)  
primary motor cortex

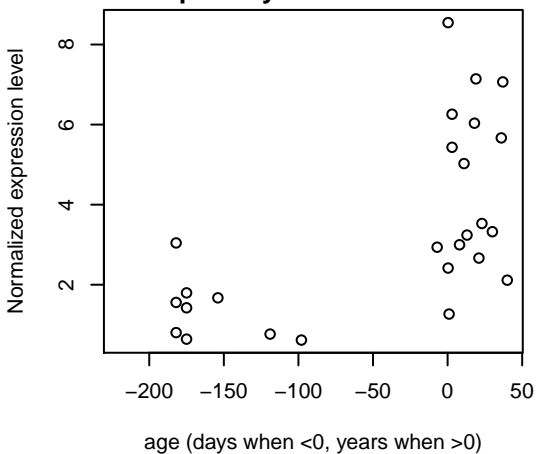

**SLC13A3\_45192052\_45192190**  
( $P=0.0053$ , Diff = -1.85)  
primary motor cortex

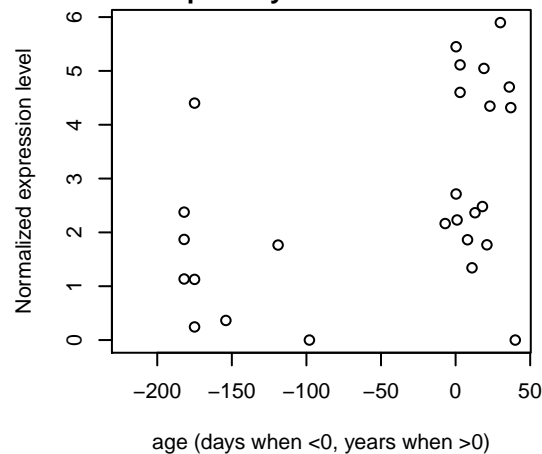

**SLC13A3\_45194867\_45195029**  
( $P=0.0034$ , Diff = -2.18)  
primary motor cortex

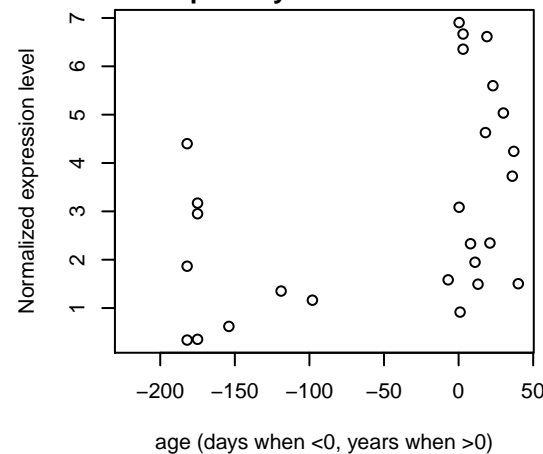

**SLC13A3\_45204211\_45204324**  
( $P=0.0028$ , Diff = -1.75)  
primary motor cortex

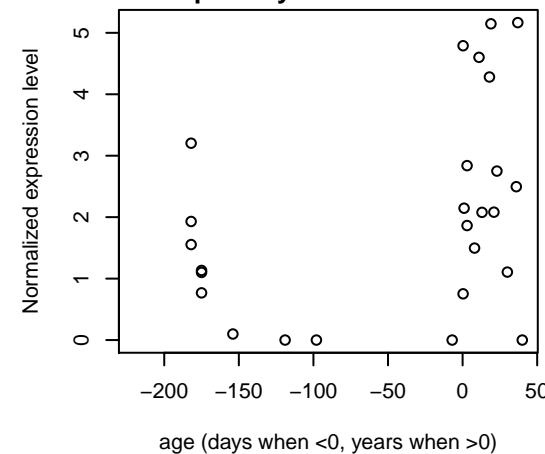

**SLC13A3\_45211549\_45212308**  
( $P=0.0867$ , Diff = -0.14)  
primary motor cortex

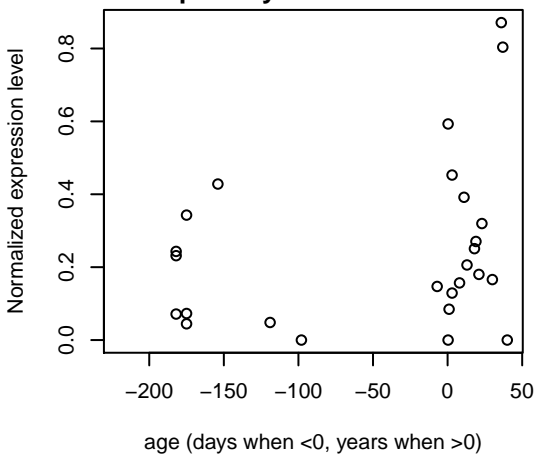

**SLC13A3\_45213986\_45214382**  
( $P=0.0508$ , Diff = 0.26)  
primary motor cortex

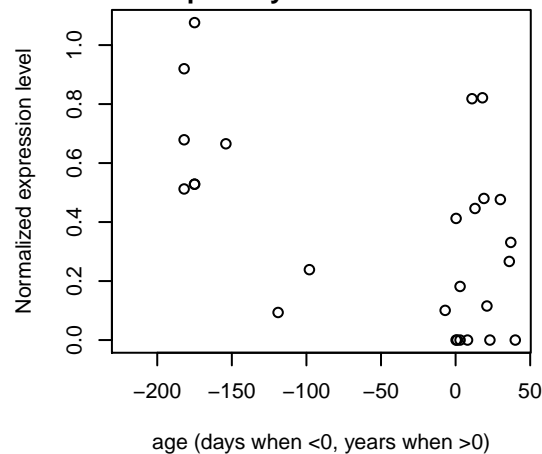

**SLC13A3\_45216697\_45216802**  
( $P=0.1482$ , Diff = -0.69)  
primary motor cortex

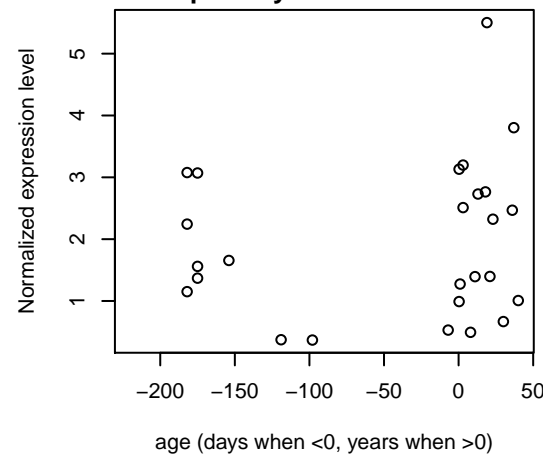

**SLC13A3\_45217798\_45217894**  
( $P=0.3279$ , Diff = -0.48)  
primary motor cortex

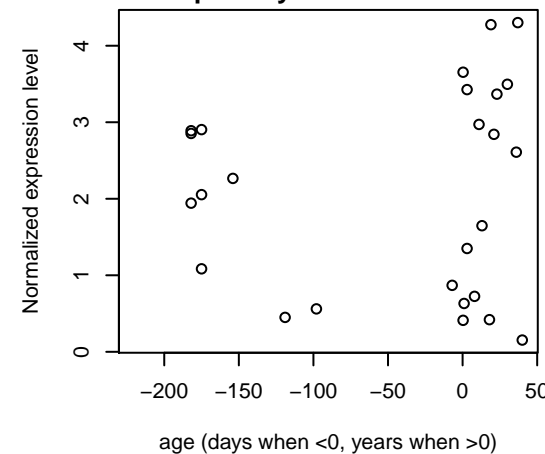

**SLC13A3\_45221042\_45221168**  
( $P=0.7404$ , Diff = -0.27)  
primary motor cortex

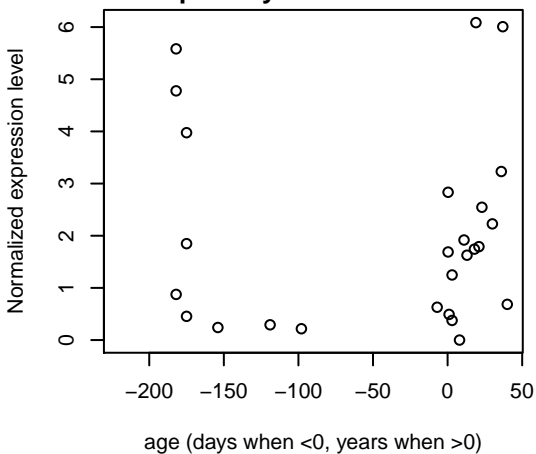

**SLC13A3\_45224795\_45224981**  
( $P=0.8106$ , Diff = -0.18)  
primary motor cortex

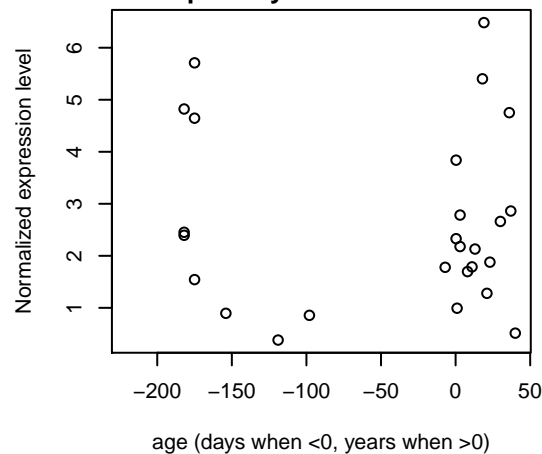

**SLC13A3\_45228609\_45228676**  
( $P=0.8874$ , Diff = -0.11)  
primary motor cortex

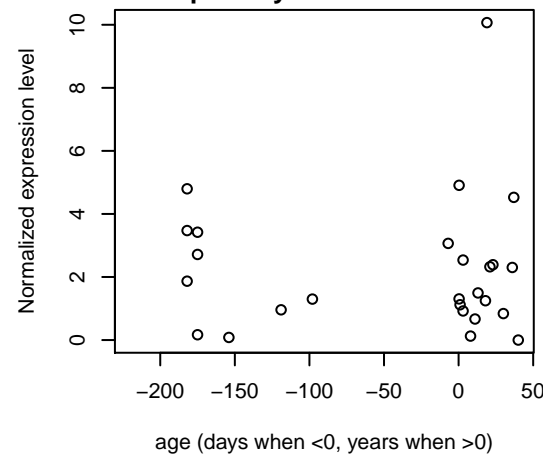

**SLC13A3\_45229226\_45229255**  
( $P=NaN$ , Diff = 0)  
primary motor cortex

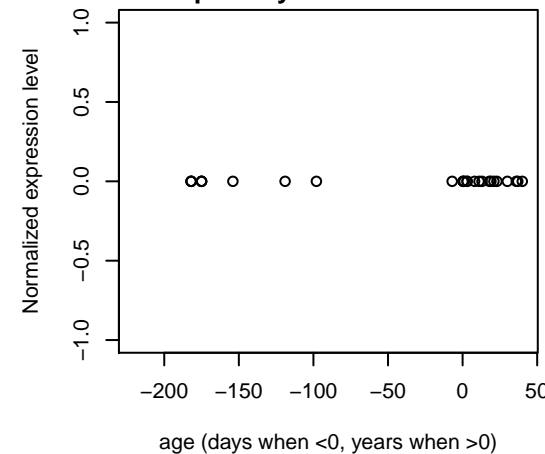

**SLC13A3\_45237347\_45237696**  
( $P=0.3156$ , Diff = -0.08)  
primary motor cortex

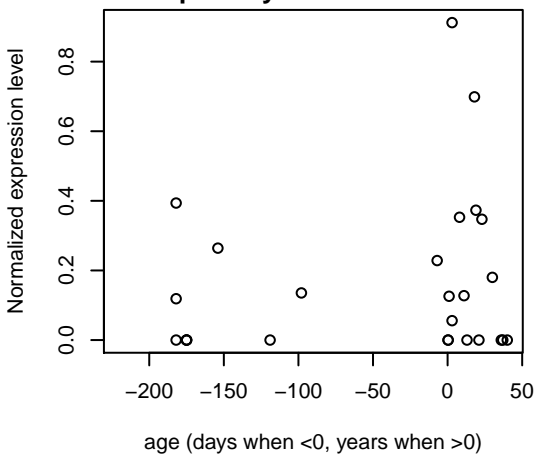

**SLC13A3\_45239084\_45239248**  
( $P=0.6491$ , Diff = -0.34)  
primary motor cortex

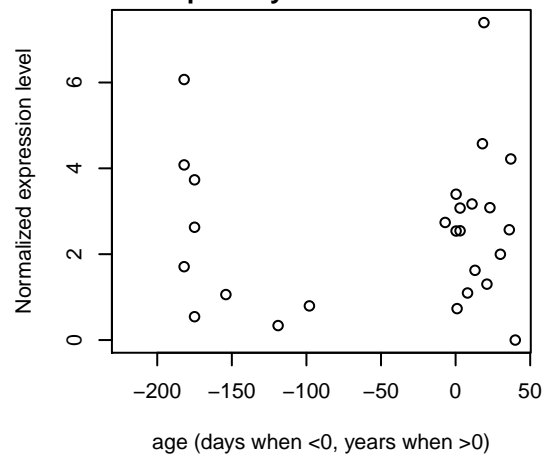

**SLC13A3\_45242098\_45242525**  
( $P=0.9561$ , Diff = 0.02)  
primary motor cortex

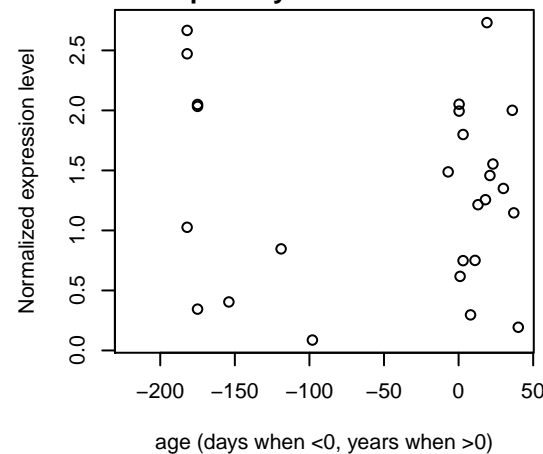

**SLC13A3\_45279949\_45280098**  
( $P=0.0061$ , Diff = -0.46)  
primary motor cortex

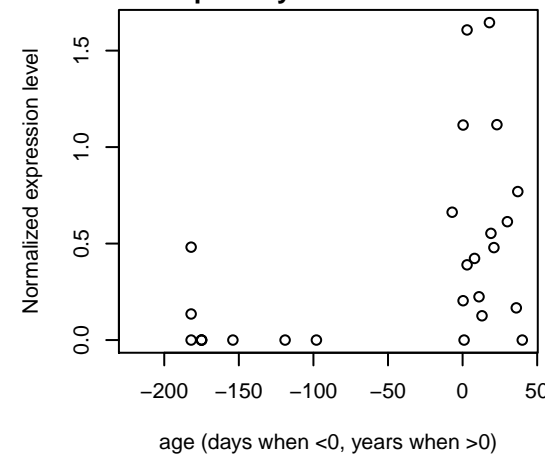

**SLC13A3\_45298681\_45298778**  
(P=0.0389, Diff = 0.5)  
primary motor cortex

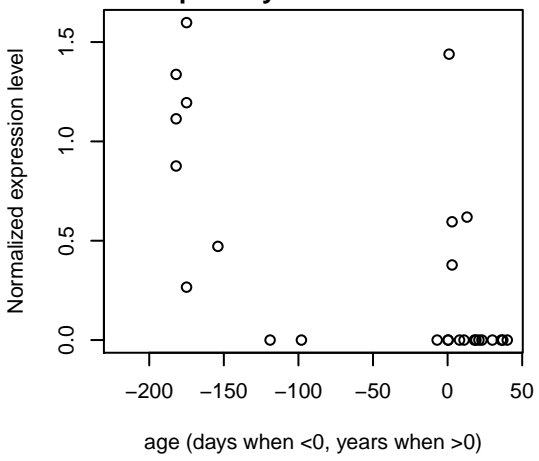

**SLC13A3\_45302302\_45302417**  
(P=0.5369, Diff = -0.07)  
primary motor cortex

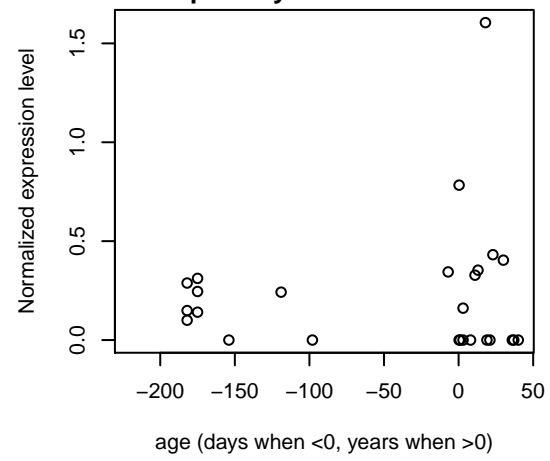

**SLC13A3\_45304585\_45304714**  
(P=0.4172, Diff = -0.04)  
primary motor cortex

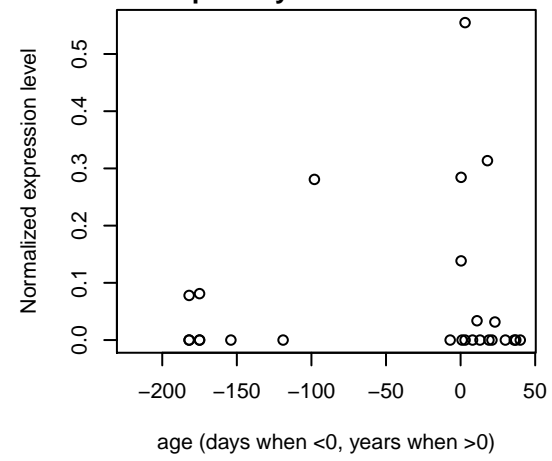

**HTR1B\_78171947\_78173490**  
**(P=0.0041, Diff = -0.94)**  
**primary motor cortex**

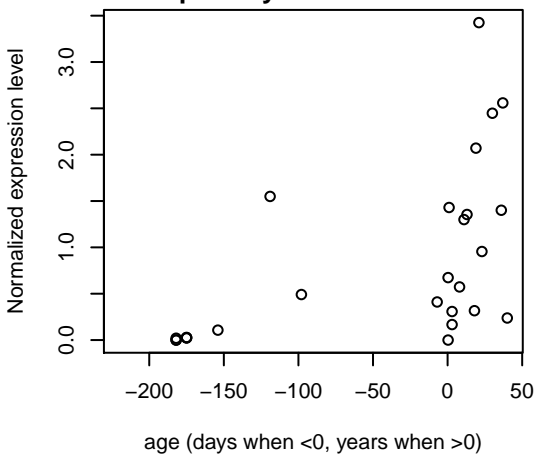

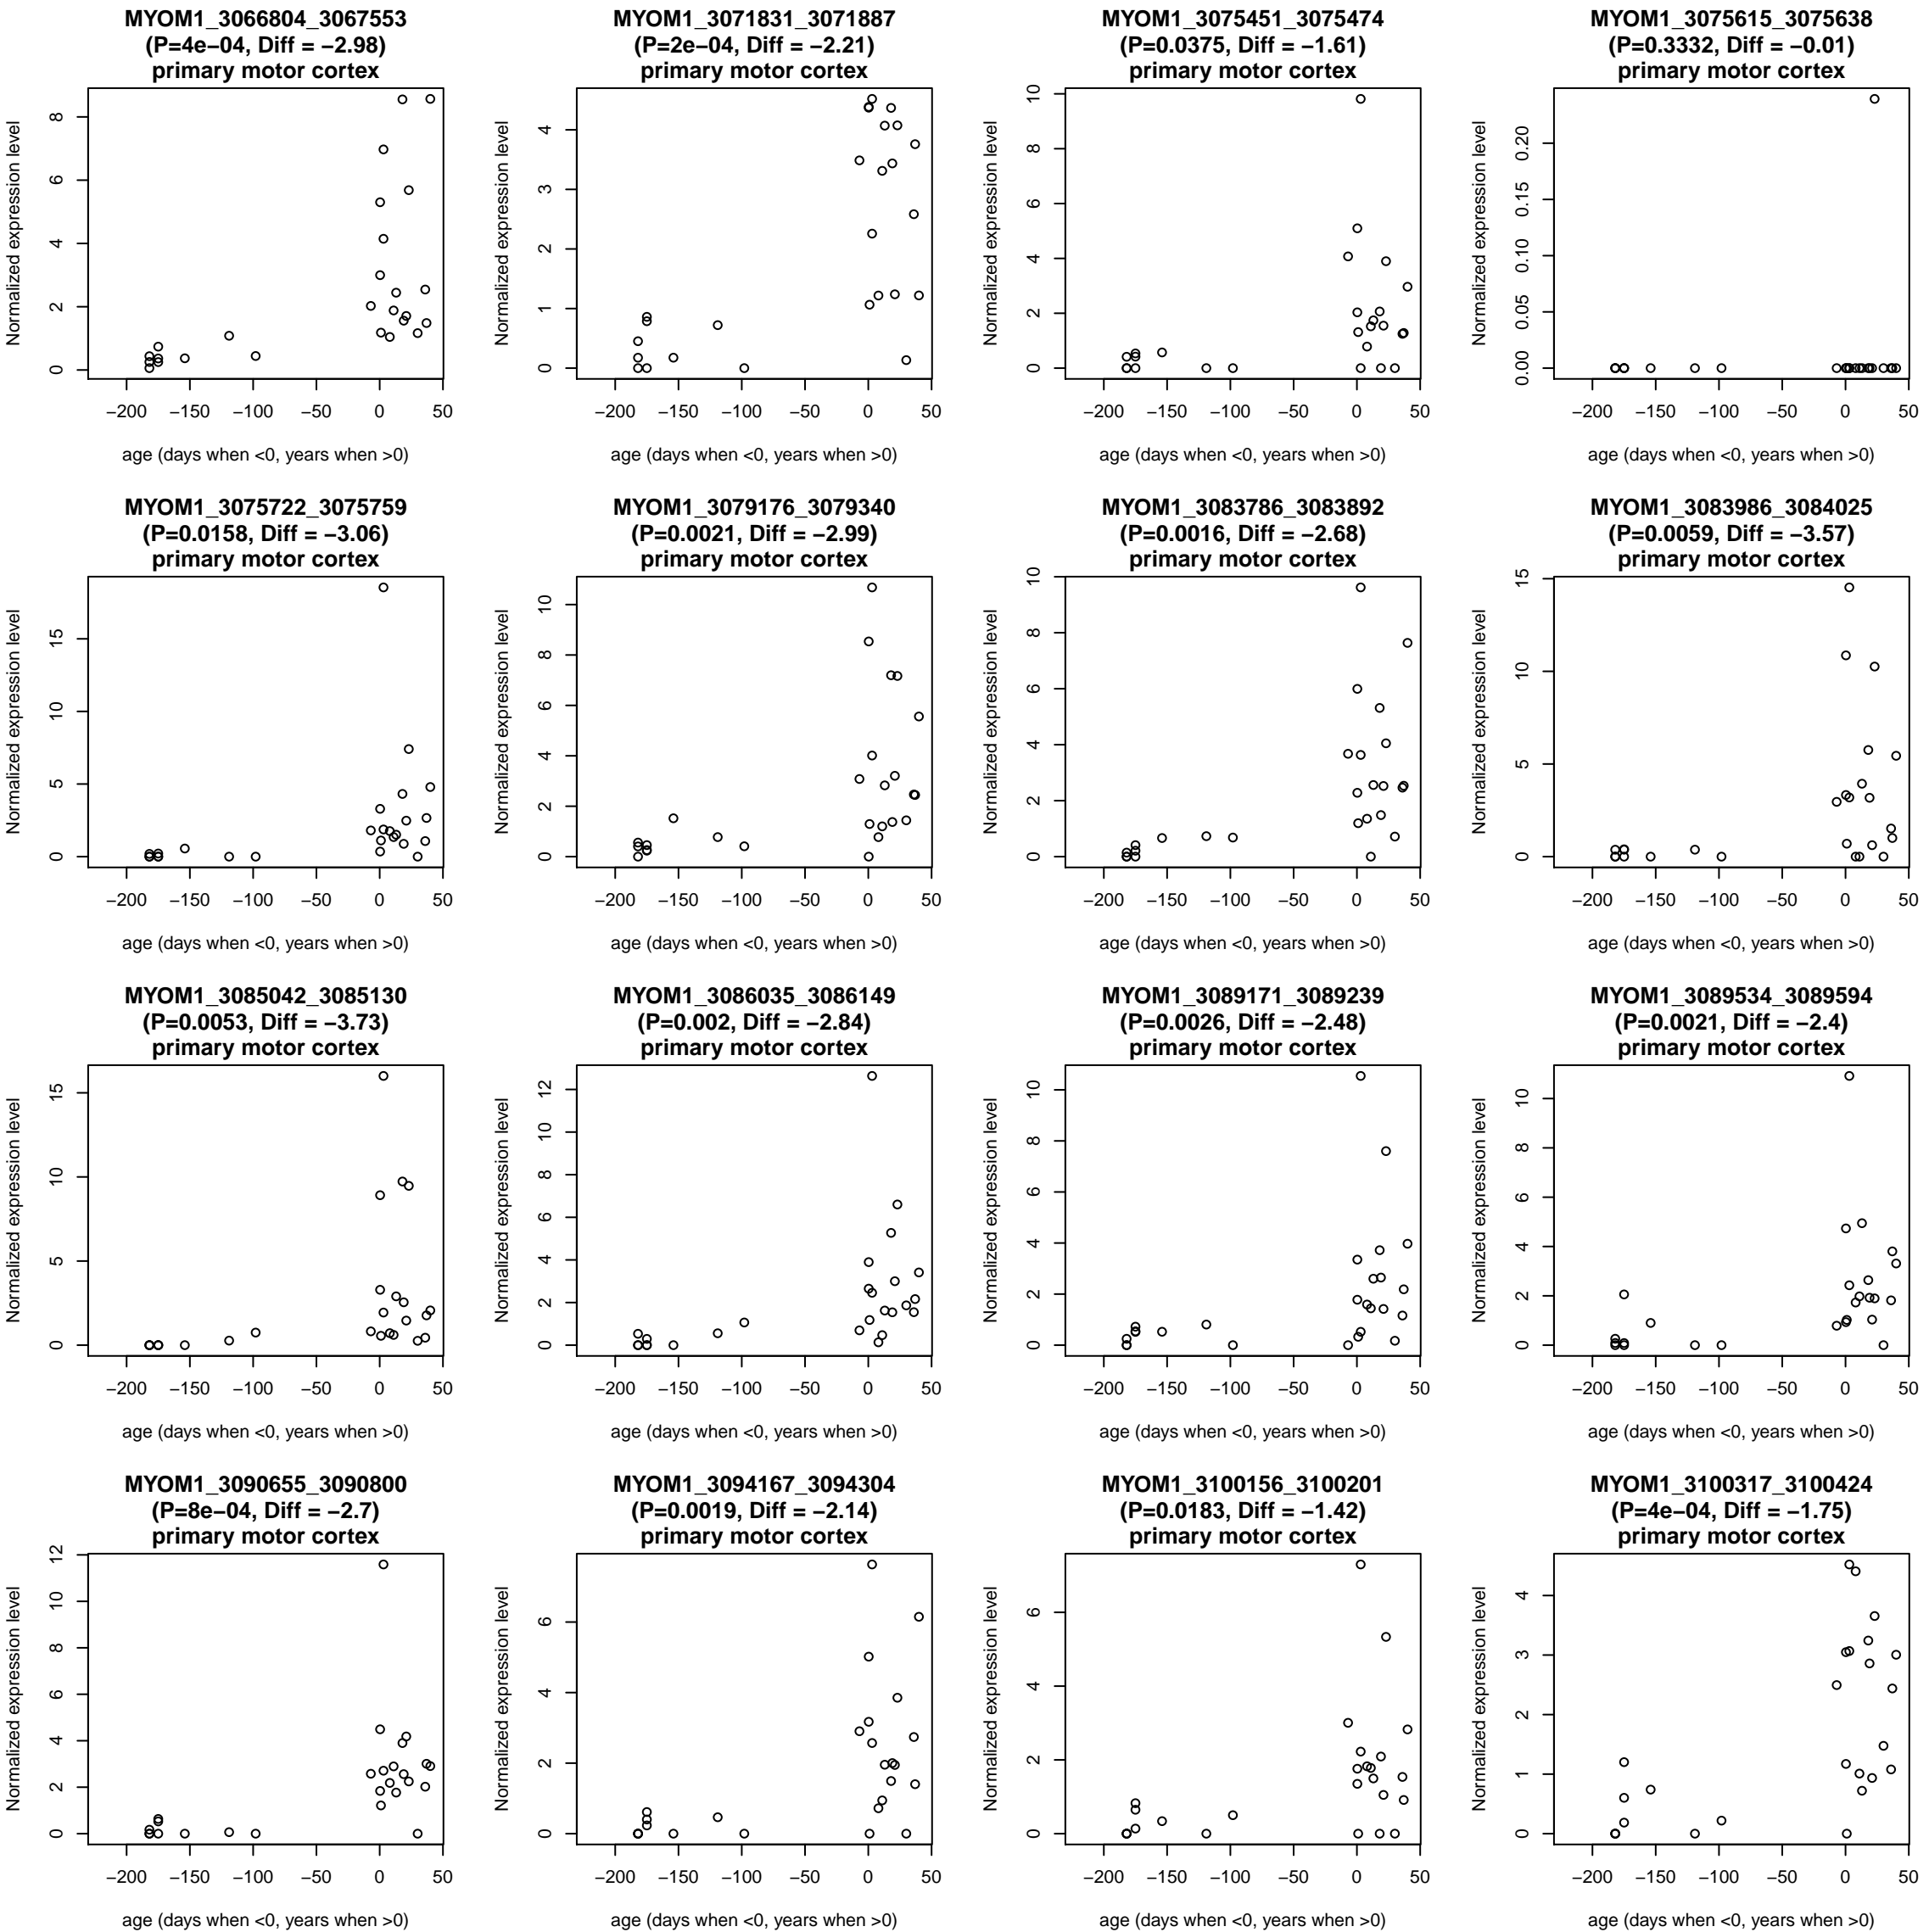

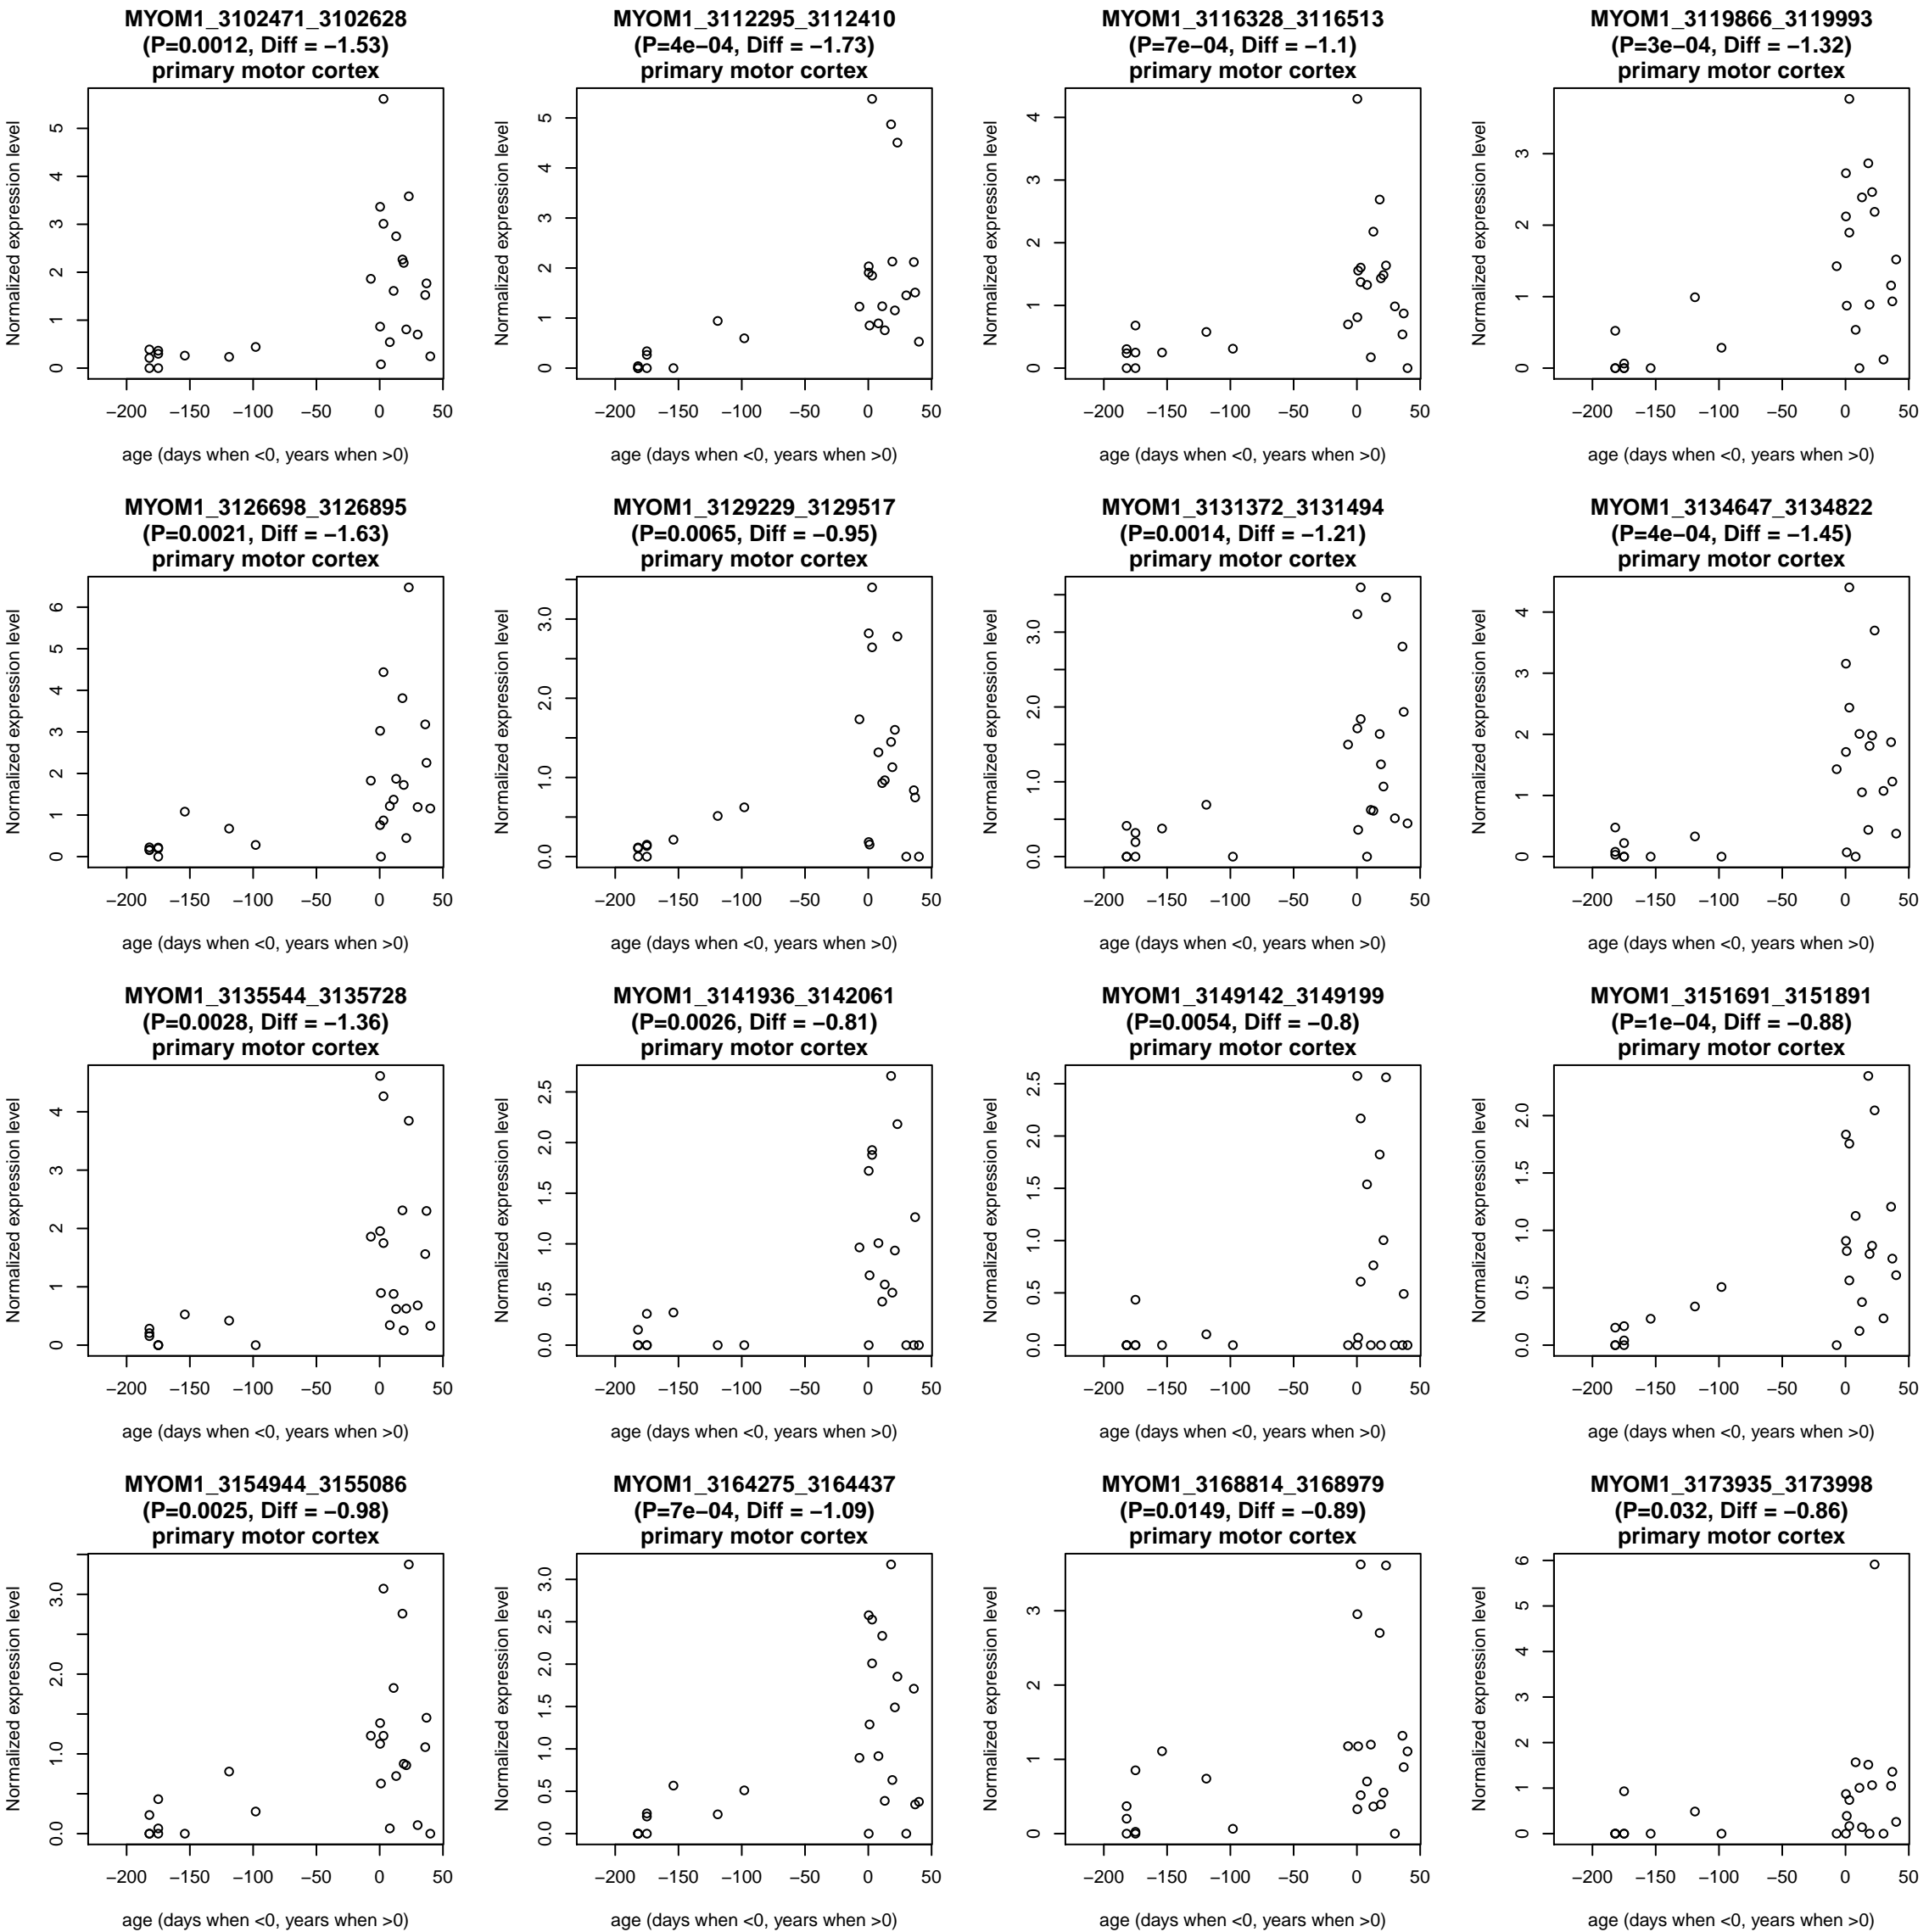



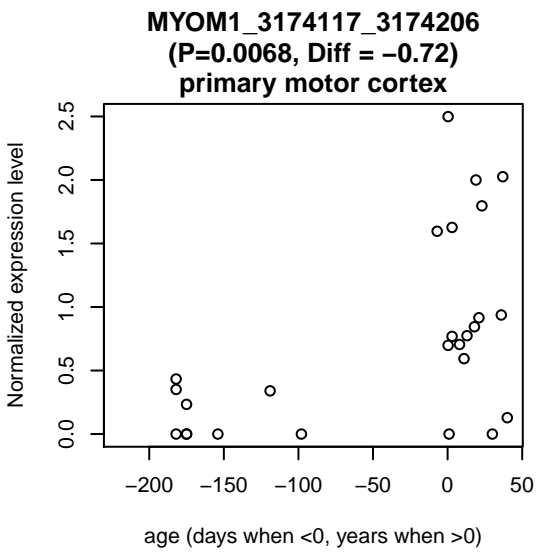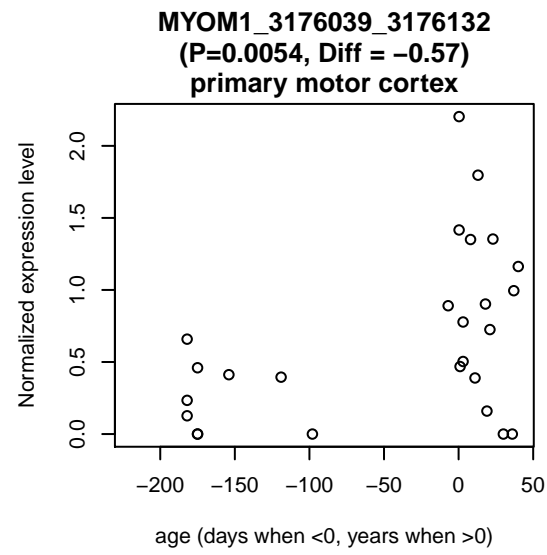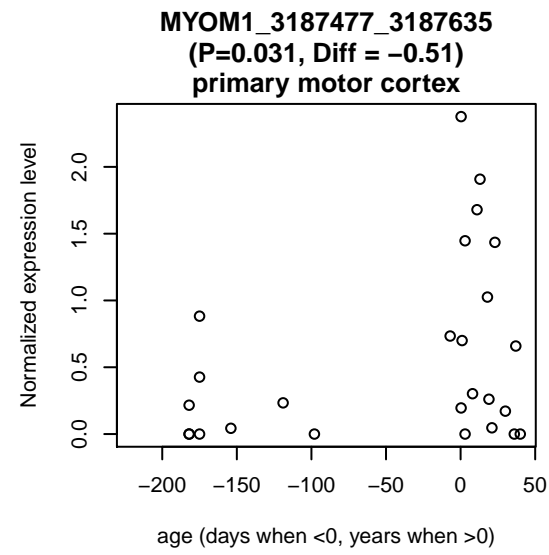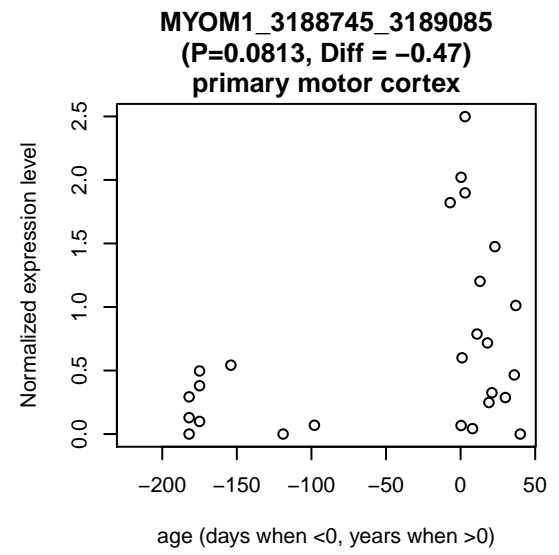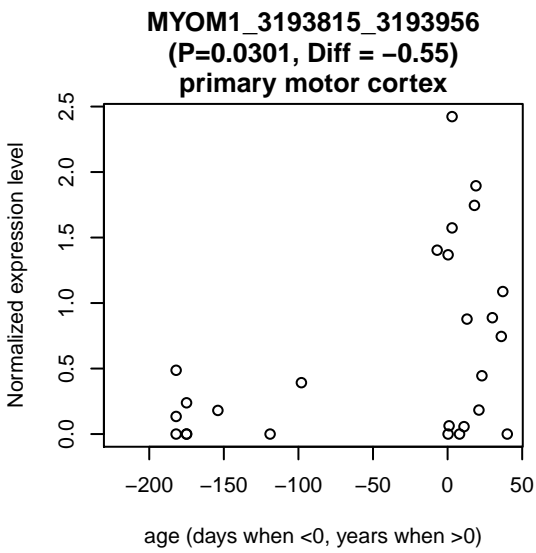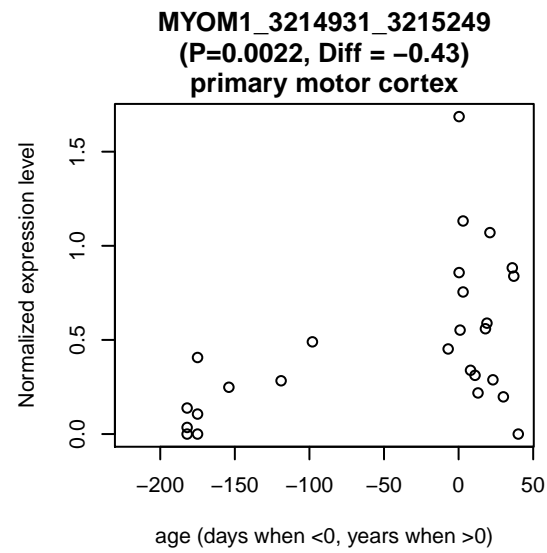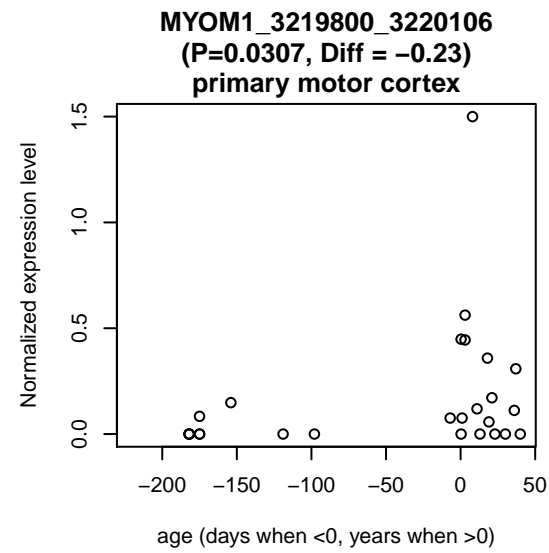

**USP44\_95910335\_95912129**  
(P=0.4319, Diff = 0.05)  
primary motor cortex

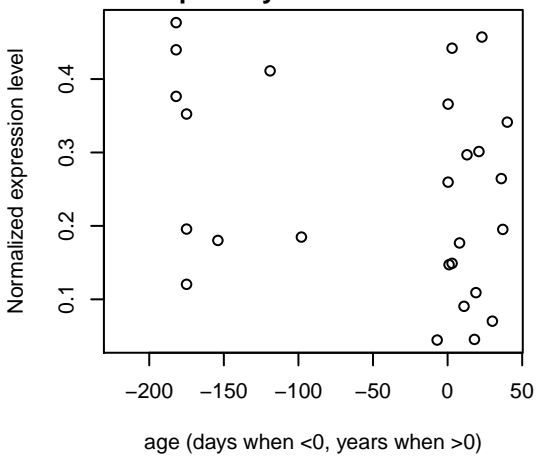

**USP44\_95914772\_95914978**  
(P=0.6921, Diff = -0.06)  
primary motor cortex

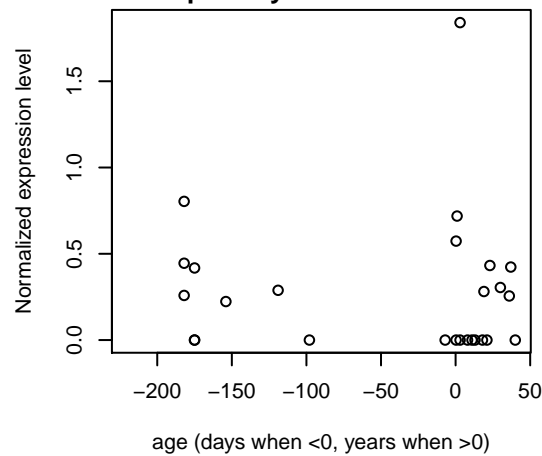

**USP44\_95918295\_95918564**  
(P=0.258, Diff = 0.08)  
primary motor cortex

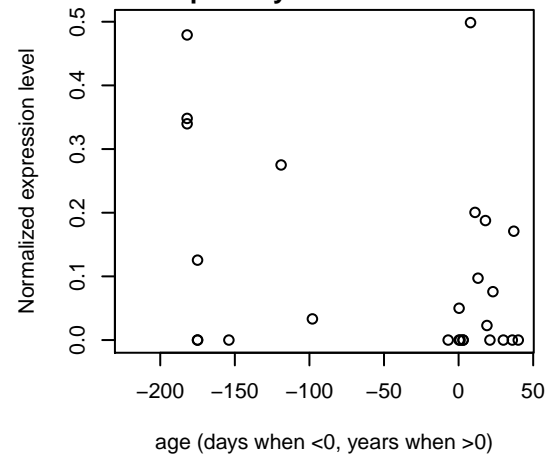

**USP44\_95922582\_95922778**  
(P=0.3457, Diff = 0.07)  
primary motor cortex

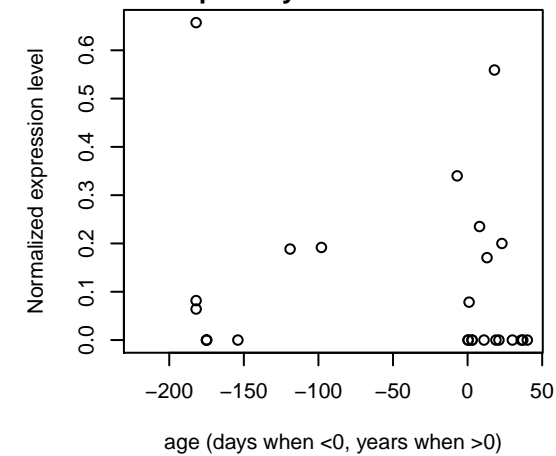

**USP44\_95926604\_95928102**  
(P=0.4278, Diff = 0.04)  
primary motor cortex

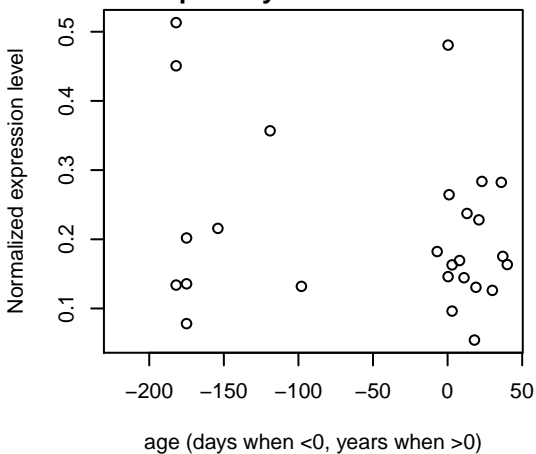

**USP44\_95929148\_95929202**  
(P=0.164, Diff = -0.09)  
primary motor cortex

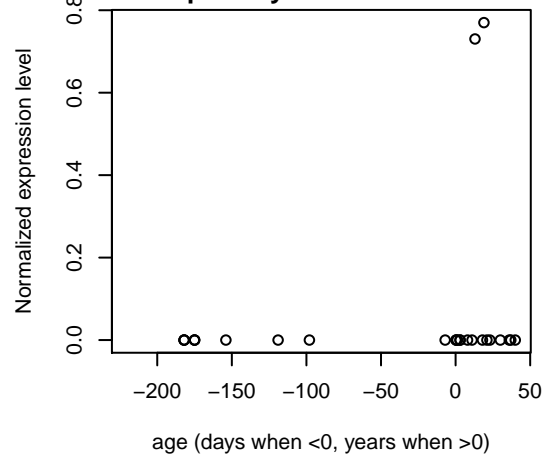

**USP44\_95940225\_95940766**  
(P=0.0286, Diff = -0.13)  
primary motor cortex

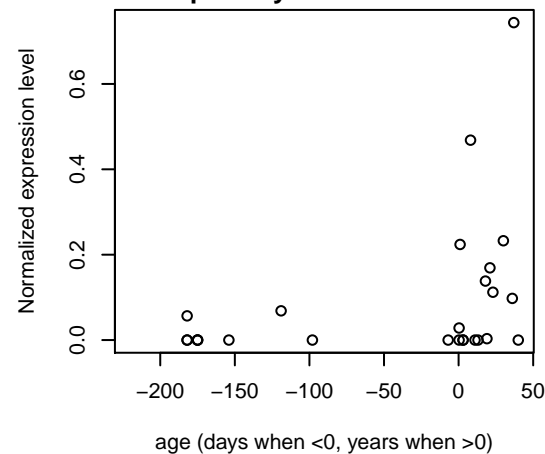

**USP44\_95941758\_95942048**  
(P=0.0786, Diff = -0.03)  
primary motor cortex

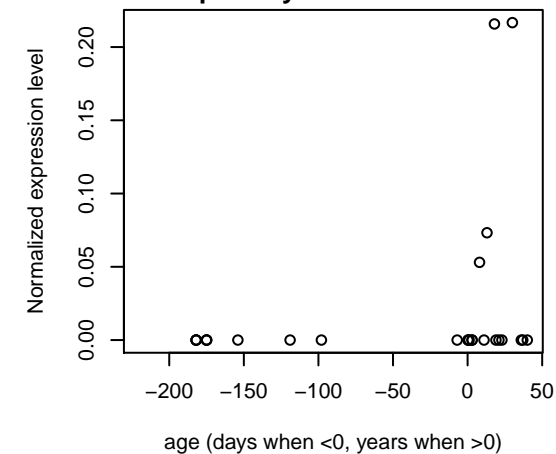

**USP44\_95942301\_95942620**  
(P=0.0563, Diff = -0.07)  
primary motor cortex

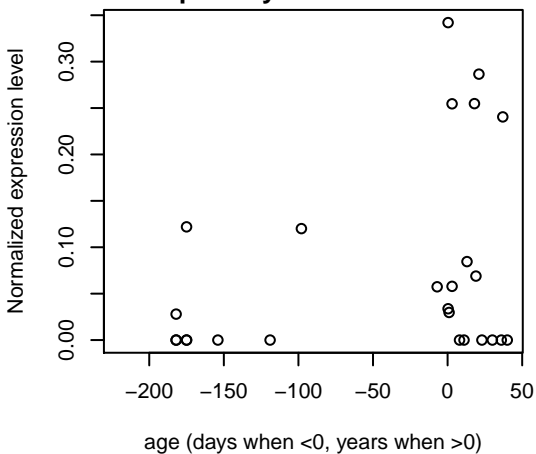

**USP44\_95945047\_95945266**  
(P=0.3332, Diff = -0.02)  
primary motor cortex

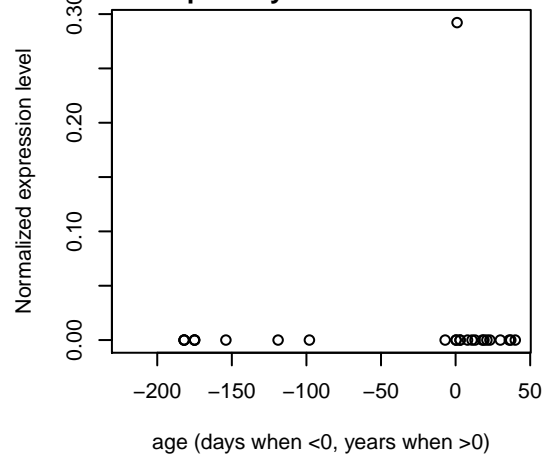

**IGFBP7\_57896938\_57897502**  
(P=0.2906, Diff = -13.94)  
primary motor cortex

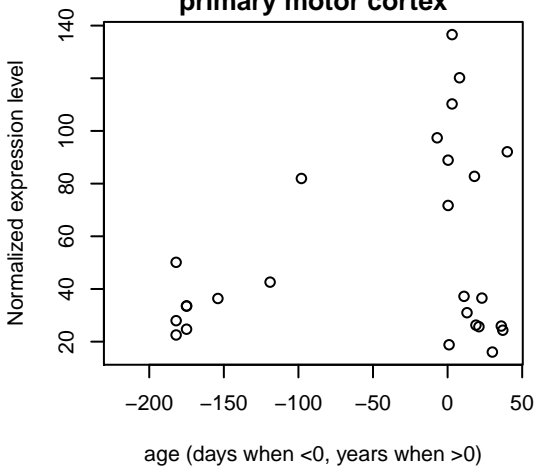

**IGFBP7\_57898203\_57898718**  
(P=0.1279, Diff = -30.24)  
primary motor cortex

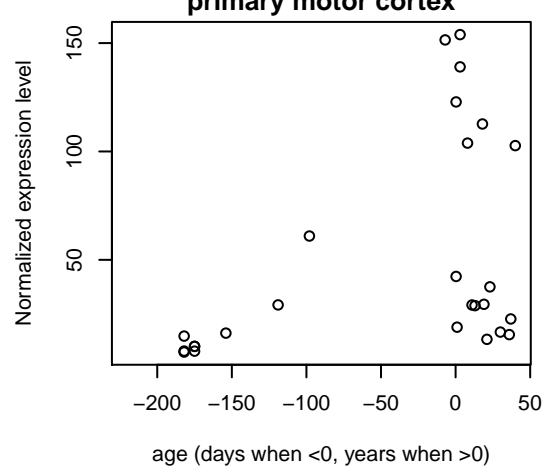

**IGFBP7\_57899360\_57899477**  
(P=0.3174, Diff = -85.68)  
primary motor cortex

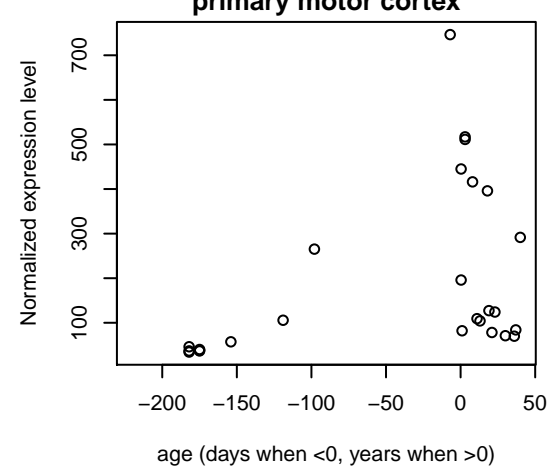

**IGFBP7\_57906989\_57907099**  
(P=0.3079, Diff = -85.27)  
primary motor cortex

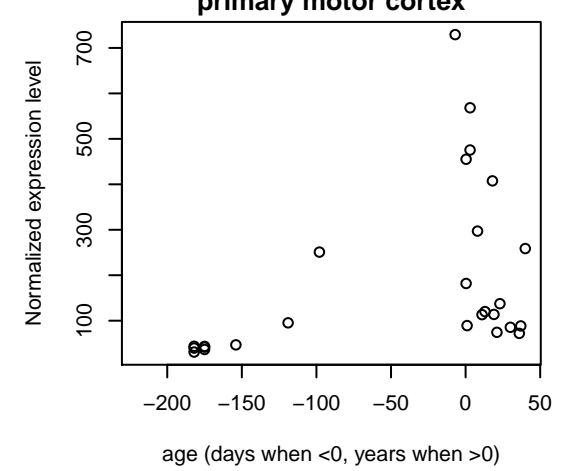

**IGFBP7\_57976042\_57976551**  
(P=0.6156, Diff = -12.48)  
primary motor cortex

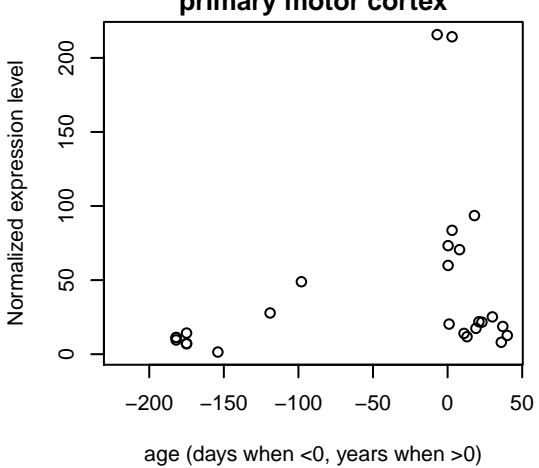

**OPA1\_193310932\_193311198**  
(P=0.1471, Diff = 2.14)  
primary motor cortex

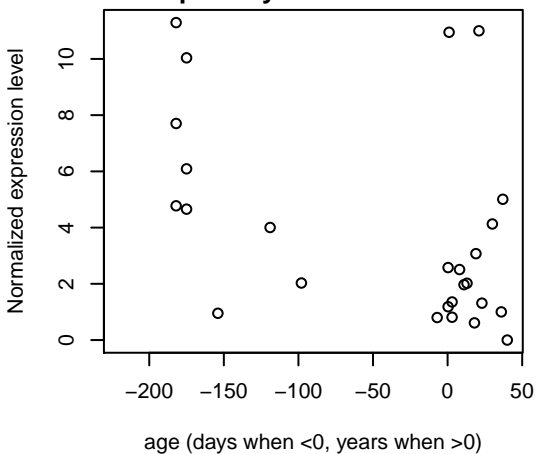

**OPA1\_193321288\_193321346**  
(P=0.2353, Diff = -0.13)  
primary motor cortex

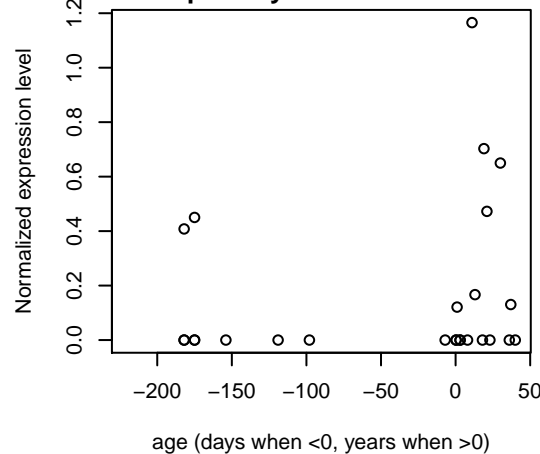

**OPA1\_193332511\_193332830**  
(P=0.4243, Diff = 2.41)  
primary motor cortex

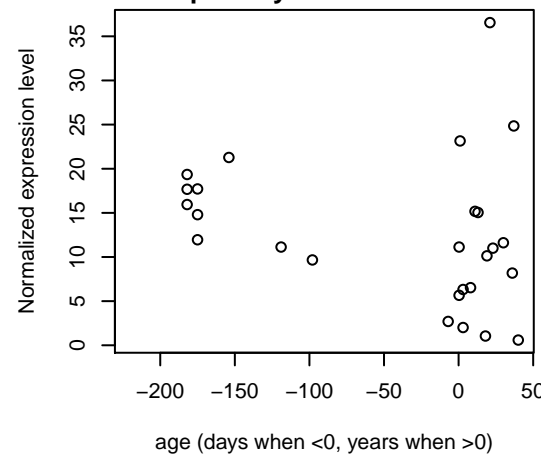

**OPA1\_193333462\_193333559**  
(P=0.1584, Diff = 4.07)  
primary motor cortex

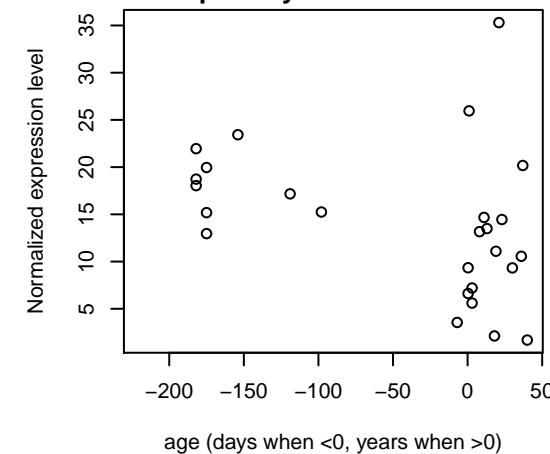

**OPA1\_193334966\_193335074**  
(P=0.0981, Diff = 6.1)  
primary motor cortex

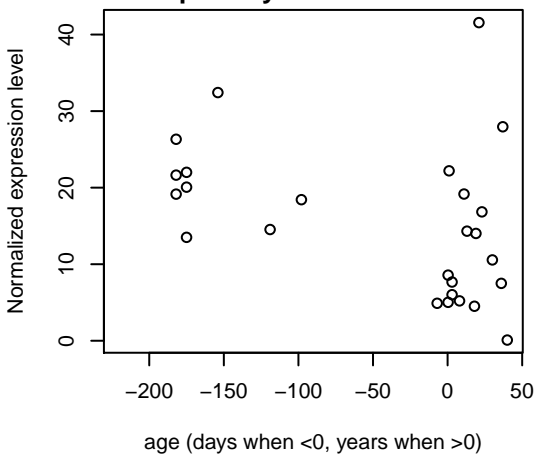

**OPA1\_193335572\_193335626**  
(P=0.7485, Diff = -0.15)  
primary motor cortex

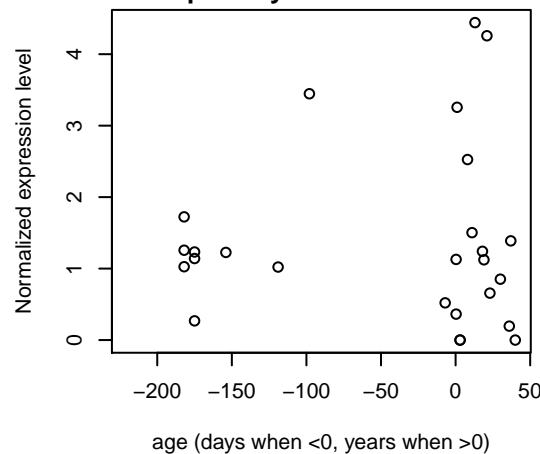

**OPA1\_193336615\_193336726**  
(P=0.1906, Diff = 3.02)  
primary motor cortex

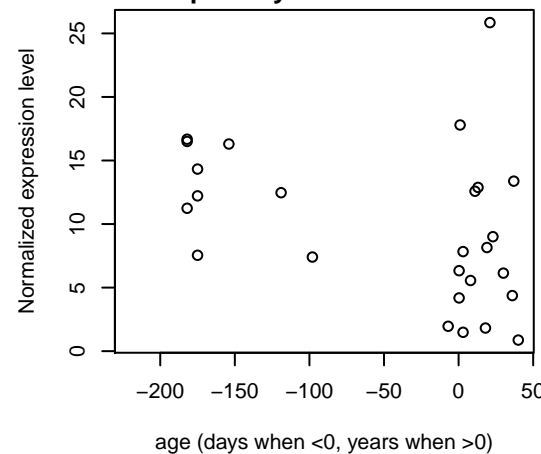

**OPA1\_193343846\_193343991**  
(P=0.5922, Diff = 0.3)  
primary motor cortex

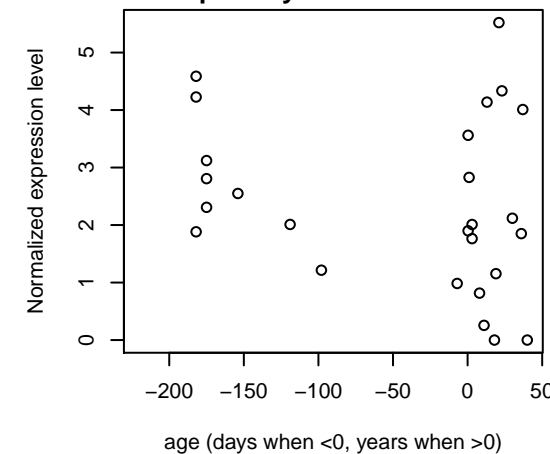

**OPA1\_193346297\_193346333**  
(P=0.9809, Diff = 0)  
primary motor cortex

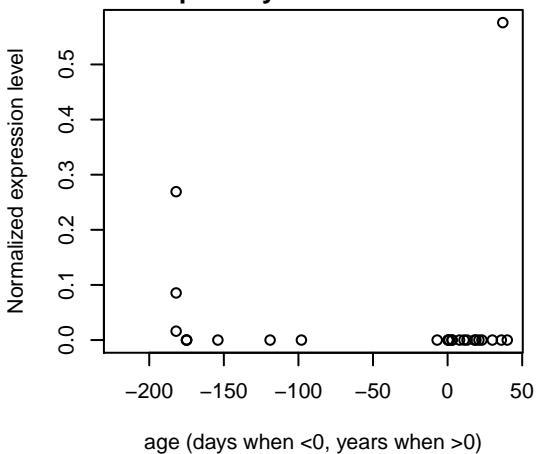

**OPA1\_193349400\_193349454**  
(P=0.2965, Diff = 3.47)  
primary motor cortex

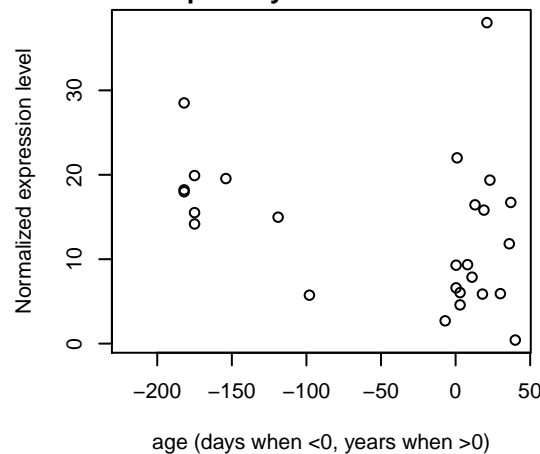

**OPA1\_193353206\_193353311**  
(P=0.7741, Diff = 1.01)  
primary motor cortex

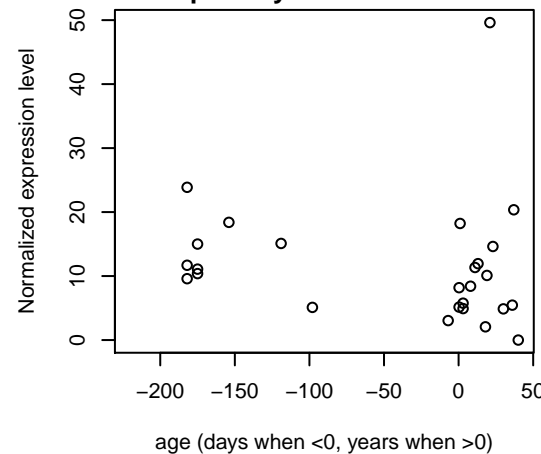

**OPA1\_193354983\_193355070**  
(P=0.4194, Diff = 3.55)  
primary motor cortex

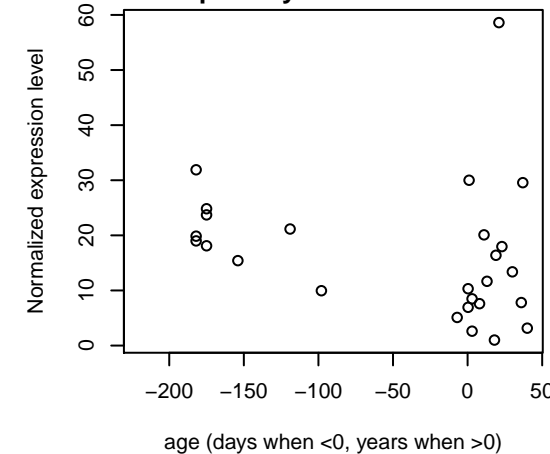

**OPA1\_193355740\_193355854**  
(P=0.1269, Diff = 6.67)  
primary motor cortex

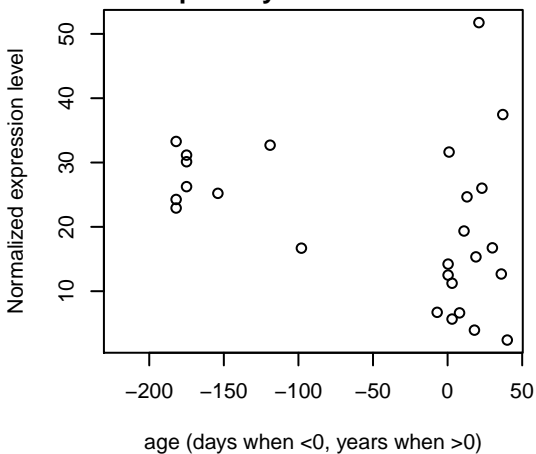

**OPA1\_193360553\_193360634**  
(P=0.3076, Diff = 3.78)  
primary motor cortex

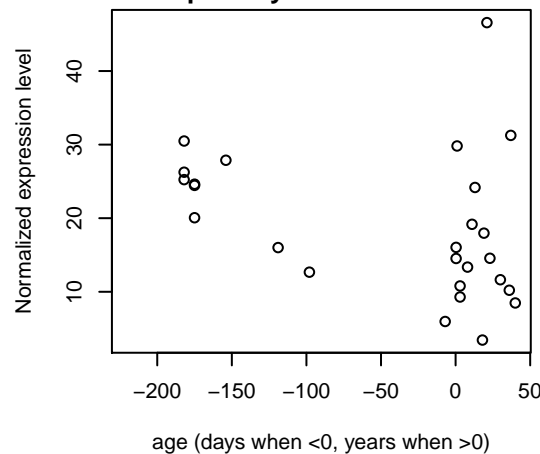

**OPA1\_193360763\_193360838**  
(P=0.1899, Diff = 5.16)  
primary motor cortex

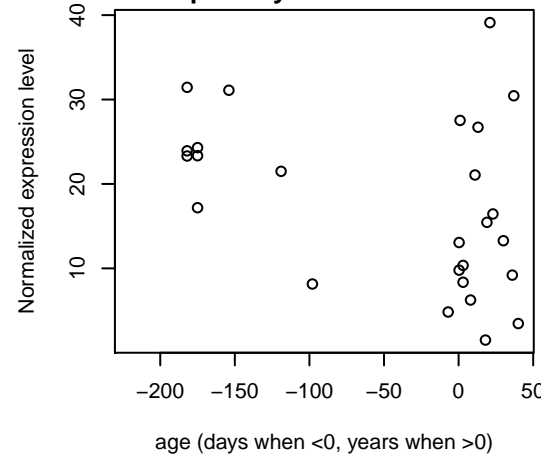

**OPA1\_193361161\_193361233**  
(P=0.2323, Diff = 4.74)  
primary motor cortex

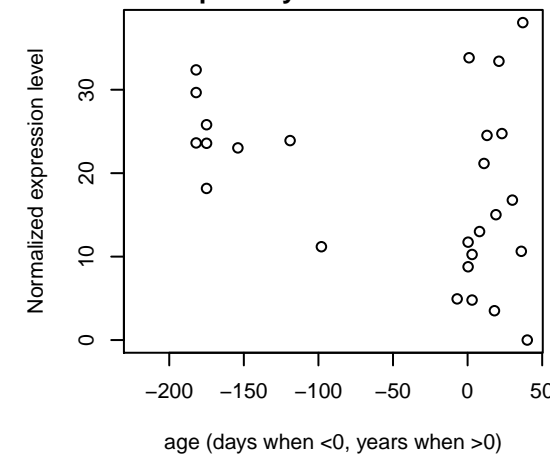

**OPA1\_193361316\_193361416**  
(P=0.1836, Diff = 5.2)  
primary motor cortex

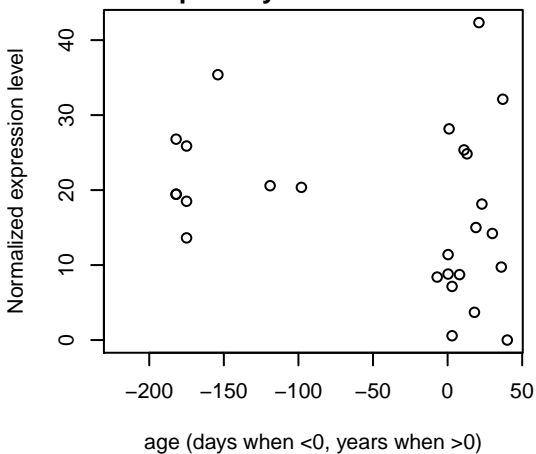

**OPA1\_193361763\_193361940**  
(P=0.1306, Diff = 4.89)  
primary motor cortex

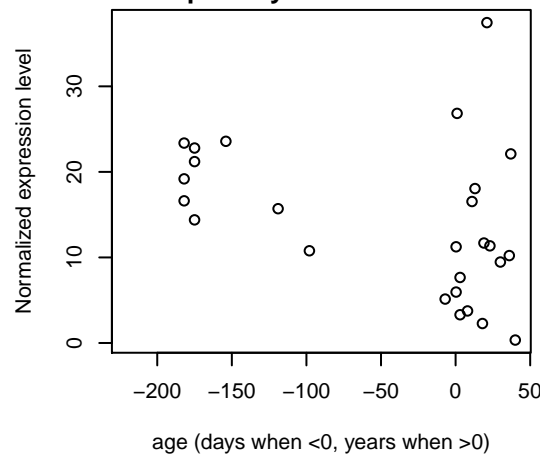

**OPA1\_193363341\_193363414**  
(P=0.3489, Diff = 3.56)  
primary motor cortex

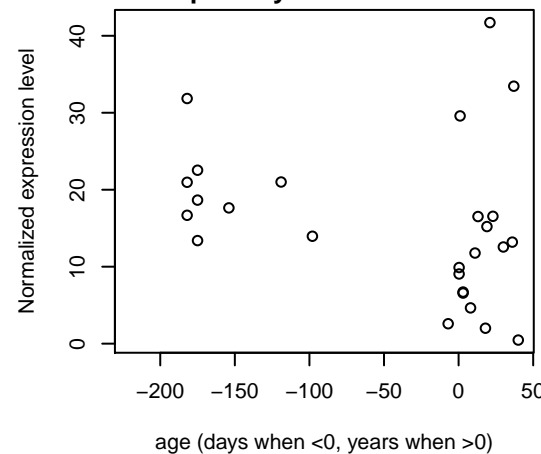

**OPA1\_193363516\_193363589**  
(P=0.2825, Diff = 4.45)  
primary motor cortex

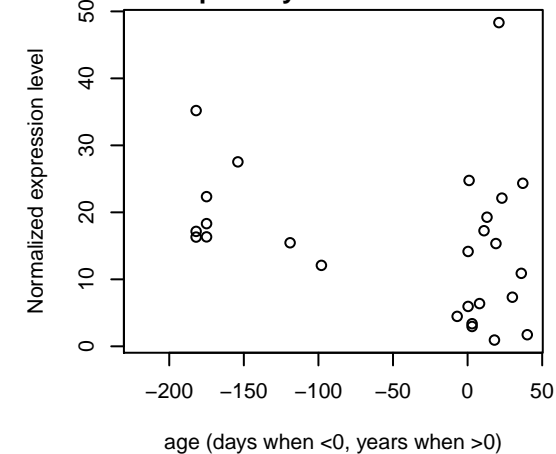

**OPA1\_193364853\_193364969**  
(P=0.2691, Diff = 4.02)  
primary motor cortex

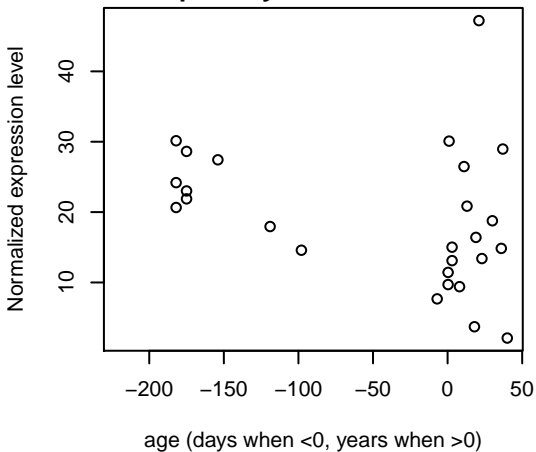

**OPA1\_193365858\_193366249**  
(P=0.711, Diff = 0.23)  
primary motor cortex

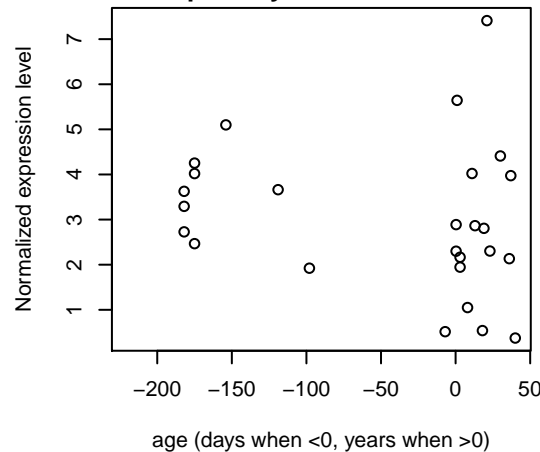

**OPA1\_193366554\_193366660**  
(P=0.6242, Diff = 1.56)  
primary motor cortex

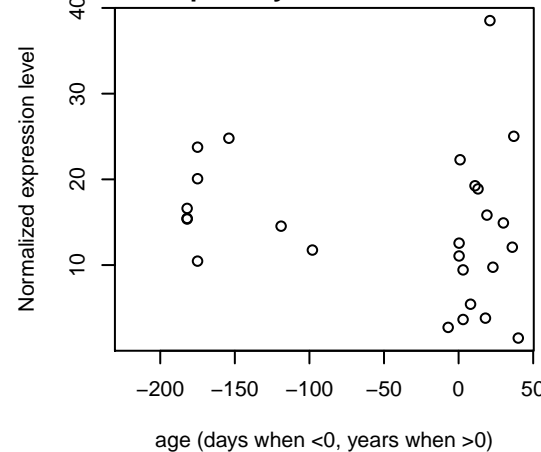

**OPA1\_193372650\_193372816**  
(P=0.4335, Diff = 3.49)  
primary motor cortex

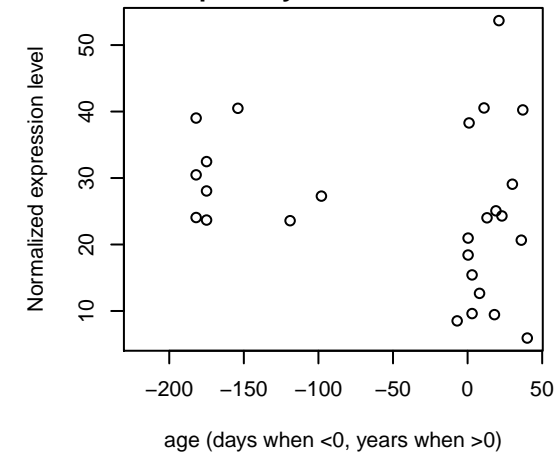

**OPA1\_193374868\_193375021**  
(P=0.6591, Diff = 1.69)  
primary motor cortex

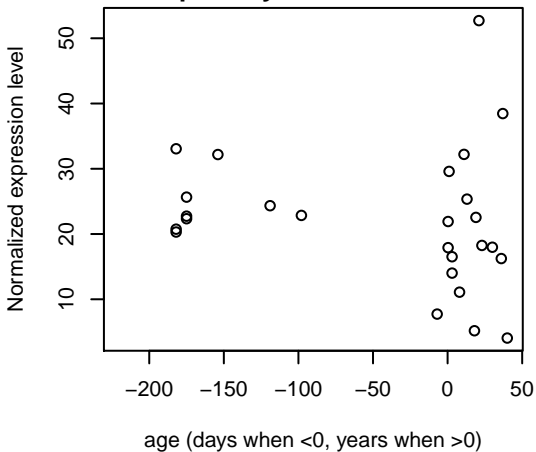

**OPA1\_193376675\_193376784**  
(P=0.873, Diff = 0.68)  
primary motor cortex

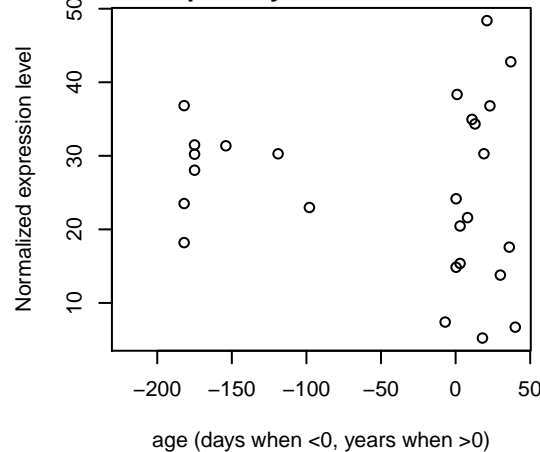

**OPA1\_193377270\_193377350**  
(P=0.7064, Diff = 1.68)  
primary motor cortex

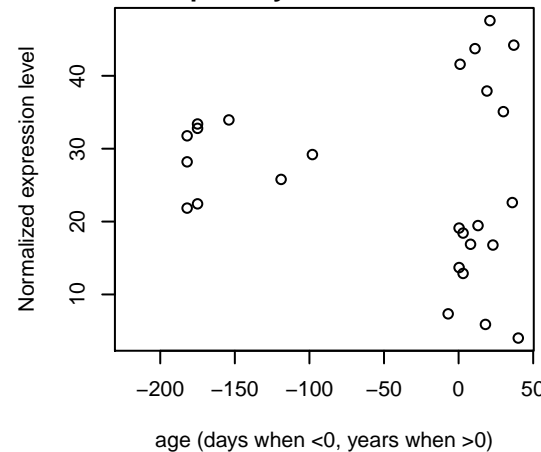

**OPA1\_193380610\_193380751**  
(P=0.1683, Diff = 7.4)  
primary motor cortex

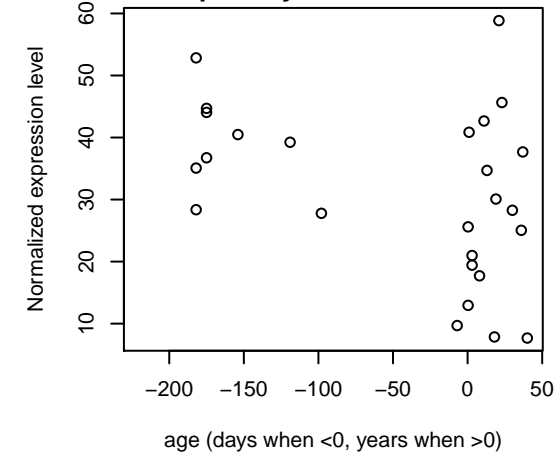

**OPA1\_193382668\_193382785**  
(P=0.5067, Diff = 2.5)  
primary motor cortex

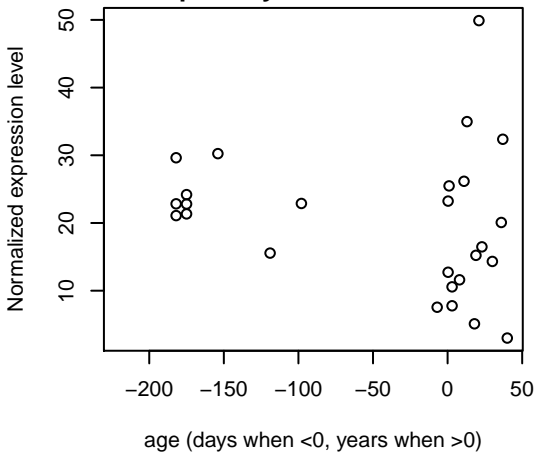

**OPA1\_193384084\_193384178**  
(P=0.3388, Diff = 4.22)  
primary motor cortex

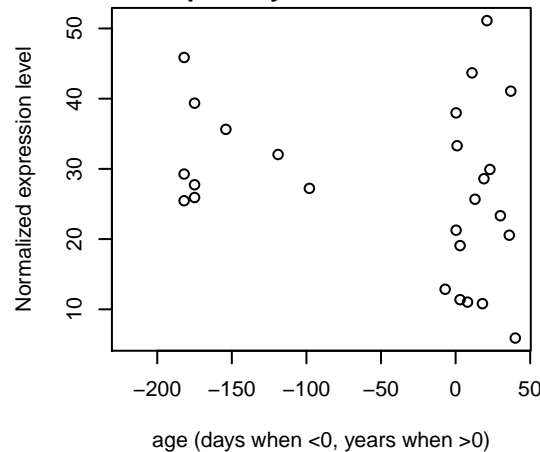

**OPA1\_193384958\_193385069**  
(P=0.5945, Diff = 2.06)  
primary motor cortex

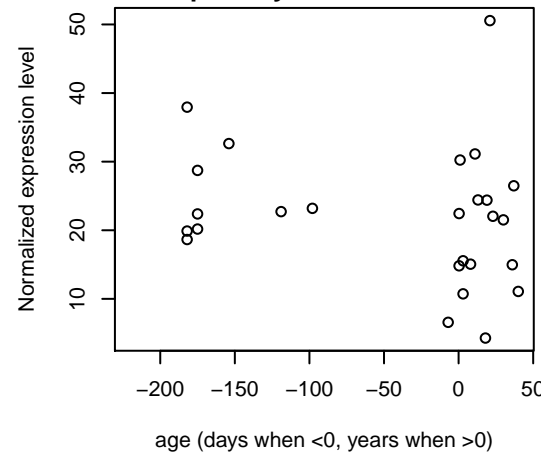

**OPA1\_193385159\_193385244**  
(P=0.4589, Diff = -0.06)  
primary motor cortex

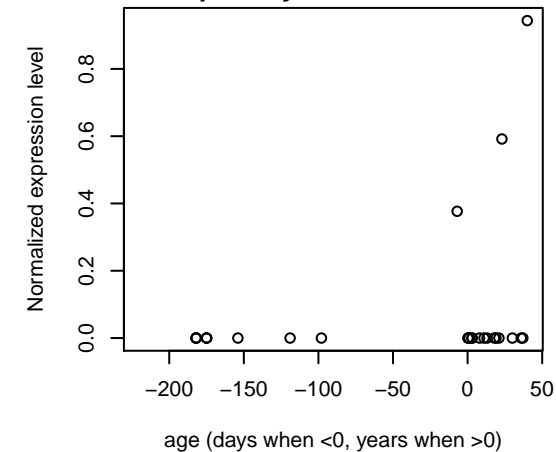

**OPA1\_193386103\_193386720**  
(P=0.0065, Diff = -0.1)  
primary motor cortex

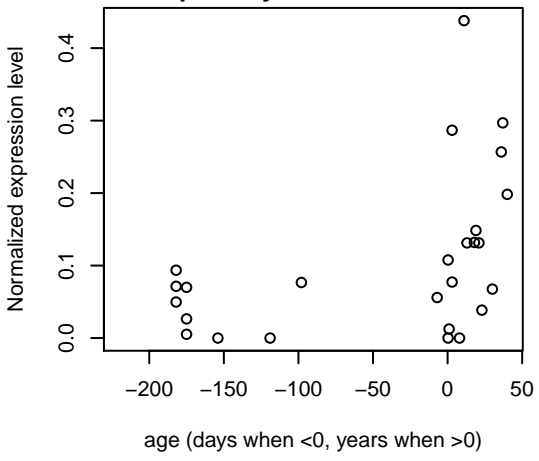

**OPA1\_193409182\_193409921**  
(P=0.84, Diff = 0.07)  
primary motor cortex

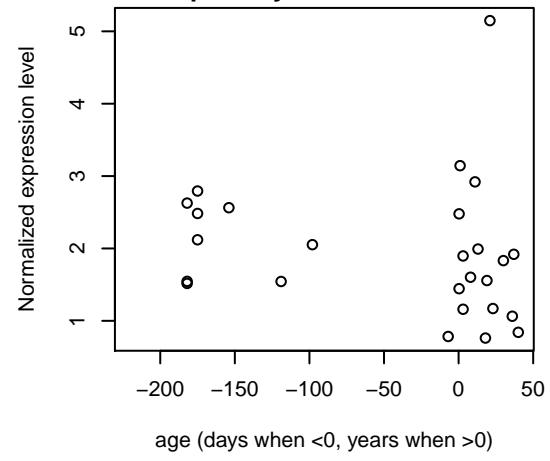

**OPA1\_193412394\_193415612**  
(P=0.3186, Diff = -2.4)  
primary motor cortex

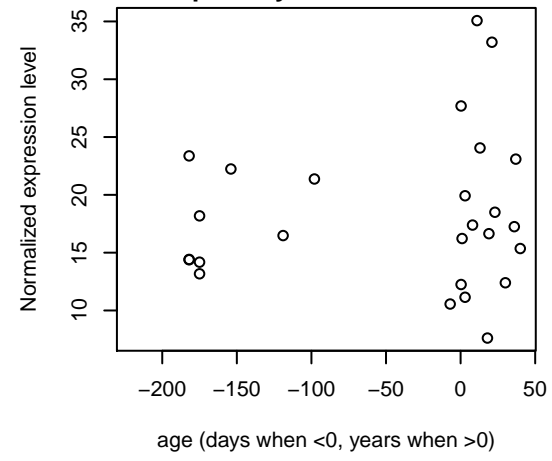

**ZMAT4\_40388108\_40389757**  
(P=0, Diff = -6.7)  
primary motor cortex

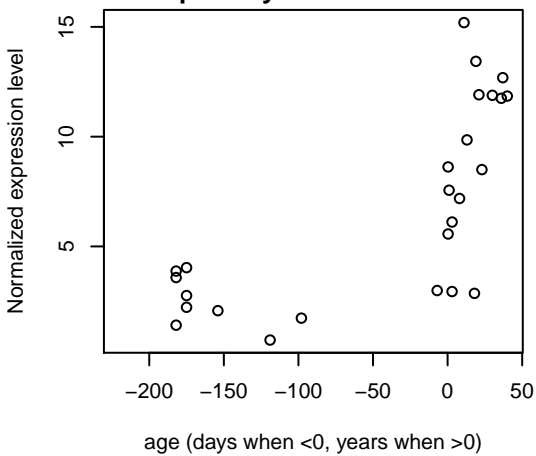

**ZMAT4\_40438683\_40438780**  
(P=0.0015, Diff = -5.53)  
primary motor cortex

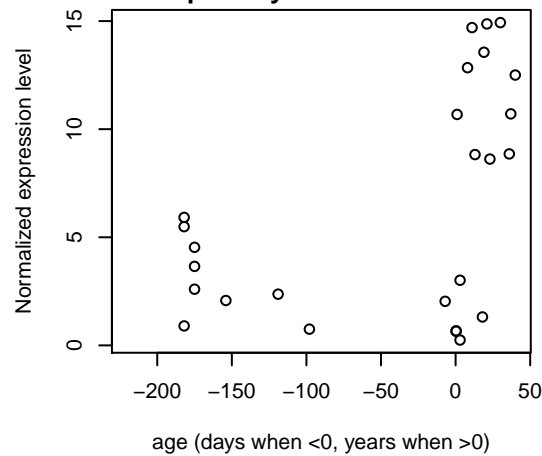

**ZMAT4\_40531882\_40532450**  
(P=0.0012, Diff = -1.56)  
primary motor cortex

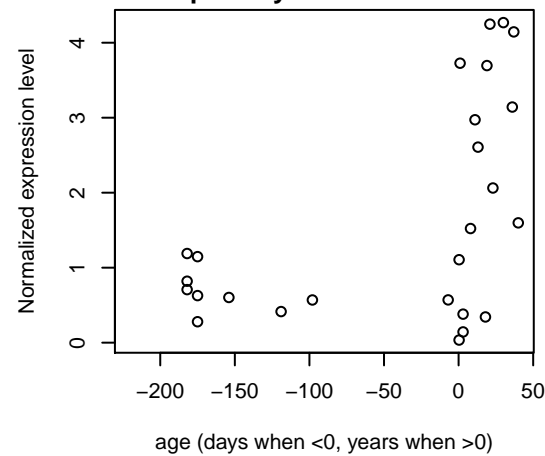

**ZMAT4\_40554514\_40554920**  
(P=0.0042, Diff = -1.8)  
primary motor cortex

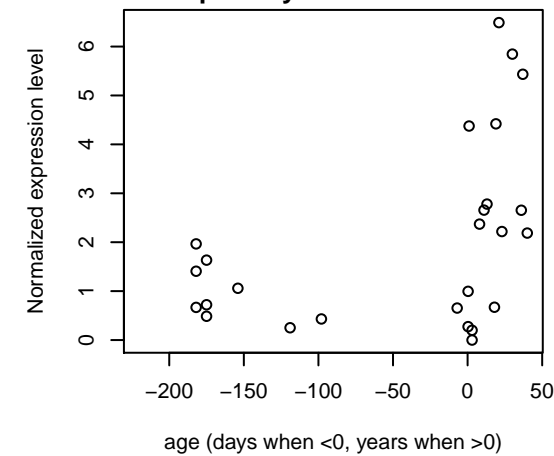

**ZMAT4\_40625159\_40625249**  
(P=0.0373, Diff = -2.82)  
primary motor cortex

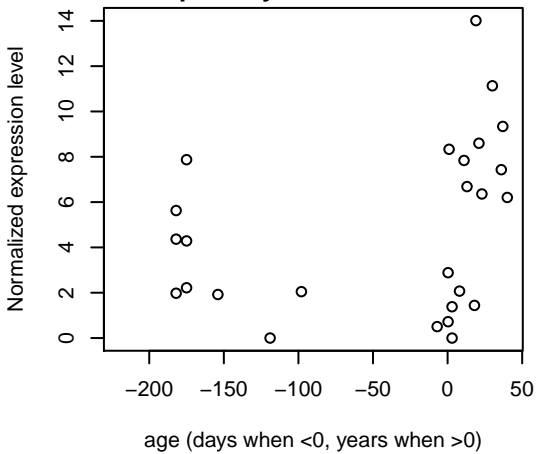

**ZMAT4\_40644207\_40644301**  
(P=0.6486, Diff = -0.03)  
primary motor cortex

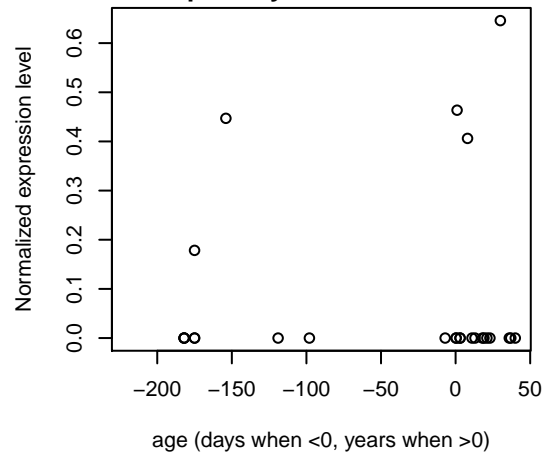

**ZMAT4\_40666027\_40666090**  
(P=0.1161, Diff = 0.2)  
primary motor cortex

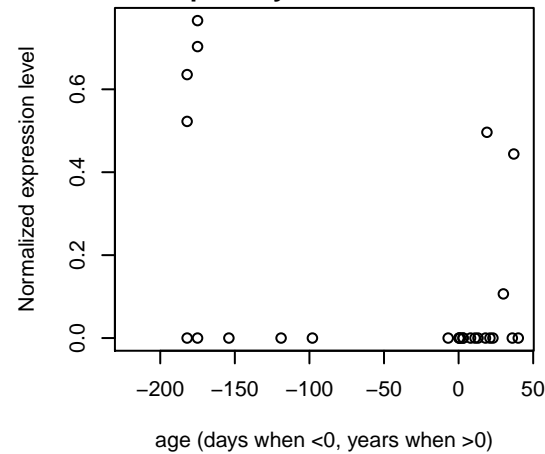

**ZMAT4\_40683093\_40683199**  
(P=0.0273, Diff = -3.13)  
primary motor cortex

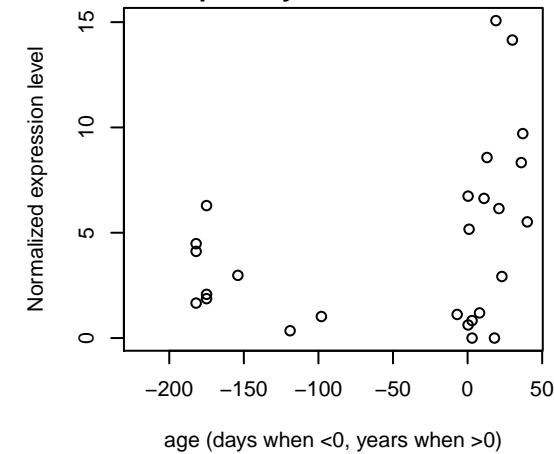

**ZMAT4\_40742047\_40742463**  
(P=3e-04, Diff = -0.33)  
primary motor cortex

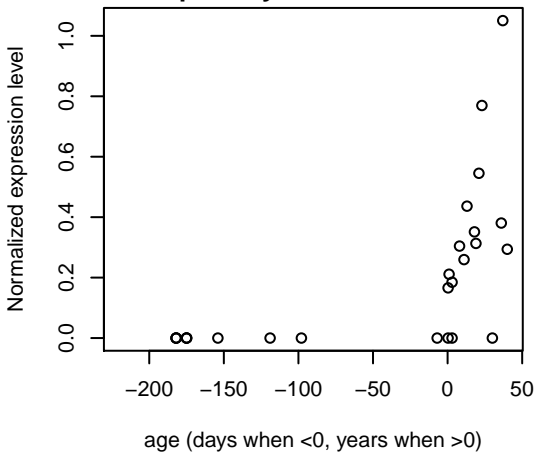

**ZMAT4\_40746013\_40746064**  
(P=0.206, Diff = -0.01)  
primary motor cortex

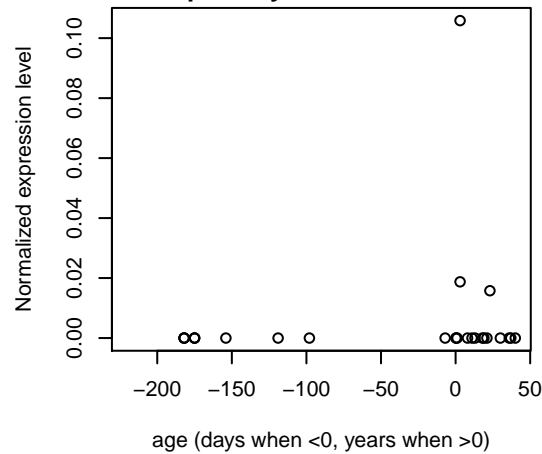

**ZMAT4\_40755201\_40755352**  
(P=0.0087, Diff = -1.23)  
primary motor cortex

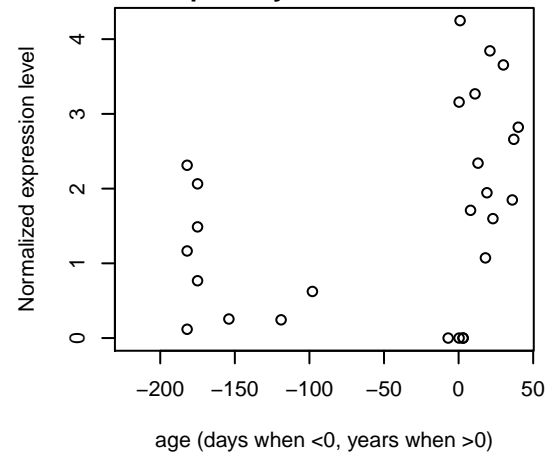

**CNDP1\_72201674\_72201926**  
(P=2e-04, Diff = -9.55)  
primary motor cortex

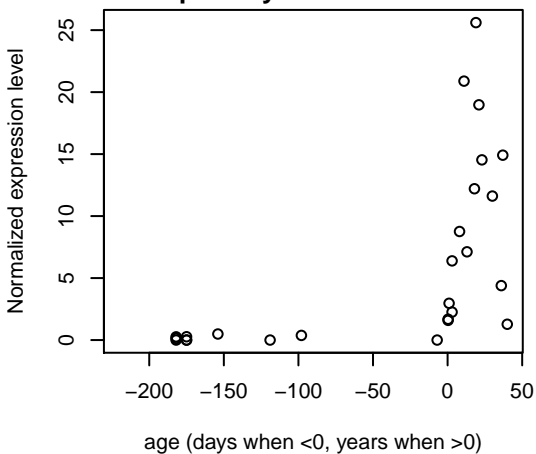

**CNDP1\_72223572\_72223701**  
(P=2e-04, Diff = -23.87)  
primary motor cortex

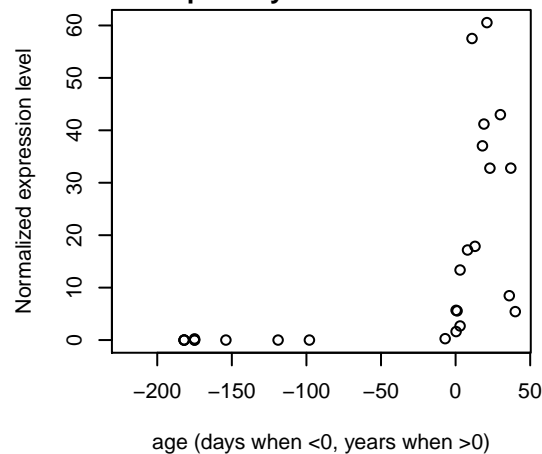

**CNDP1\_72226557\_72226707**  
(P=4e-04, Diff = -24.95)  
primary motor cortex

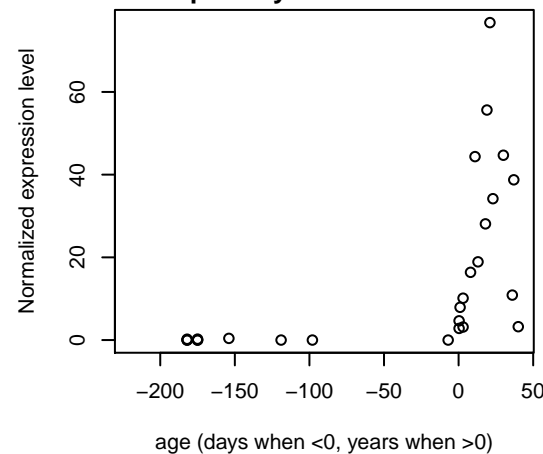

**CNDP1\_72228090\_72228253**  
(P=4e-04, Diff = -34.37)  
primary motor cortex

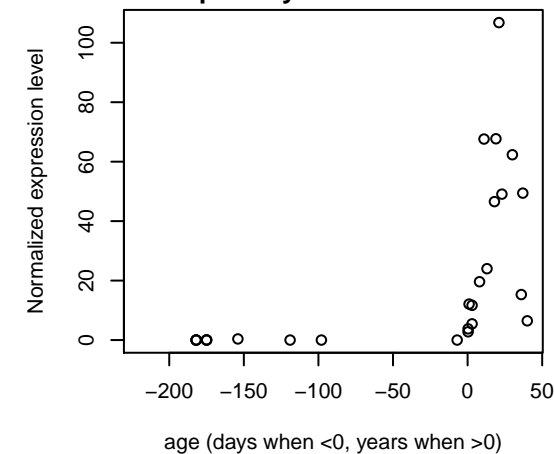

**CNDP1\_72229281\_72229370**  
(P=2e-04, Diff = -47.22)  
primary motor cortex

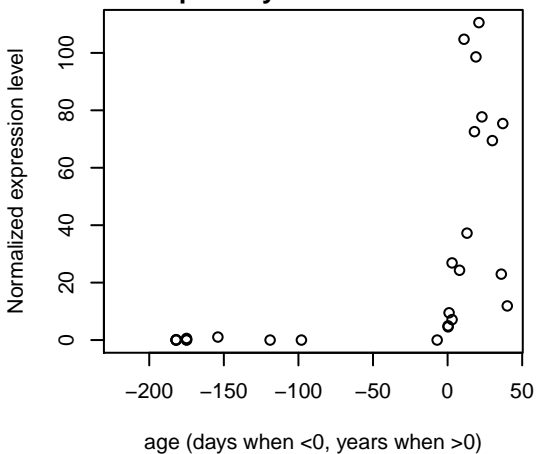

**CNDP1\_72234467\_72234668**  
(P=2e-04, Diff = -54.23)  
primary motor cortex

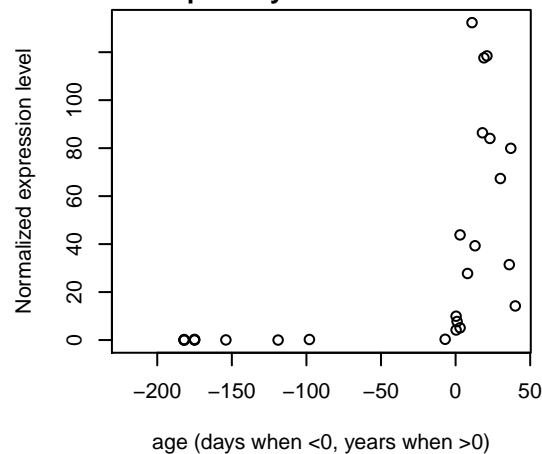

**CNDP1\_72238420\_72238505**  
(P=4e-04, Diff = -55.13)  
primary motor cortex

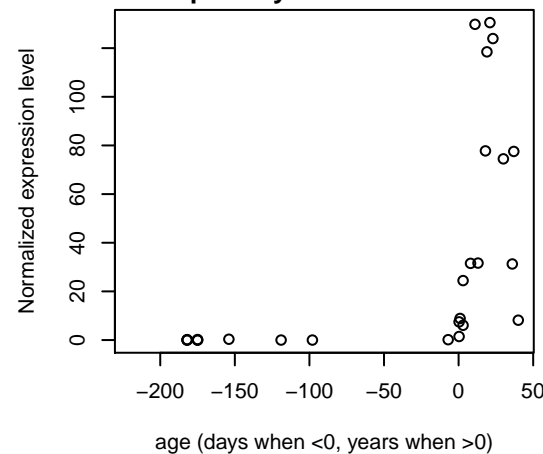

**CNDP1\_72244103\_72244264**  
(P=5e-04, Diff = -43.07)  
primary motor cortex

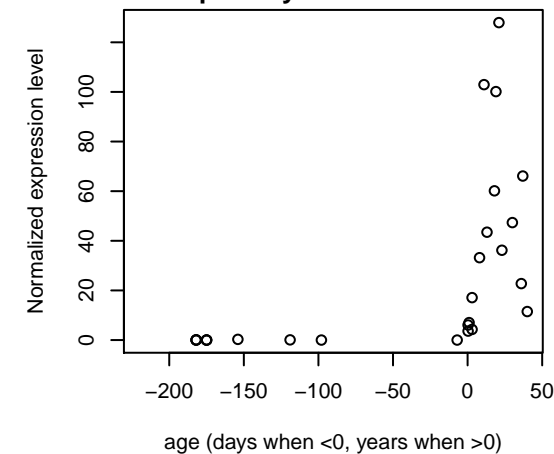

**CNDP1\_72245397\_72245562**  
(P=3e-04, Diff = -54.29)  
primary motor cortex

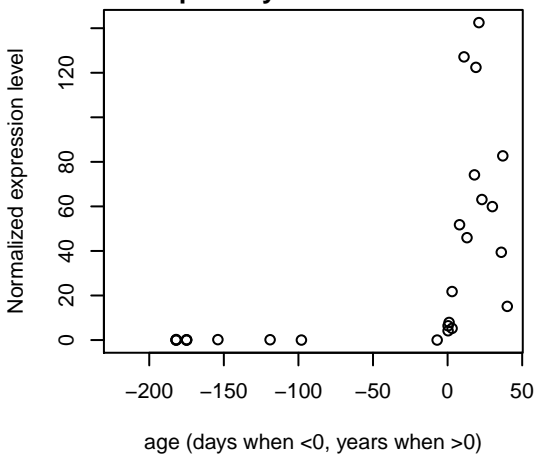

**CNDP1\_72247365\_72247507**  
(P=2e-04, Diff = -69.02)  
primary motor cortex

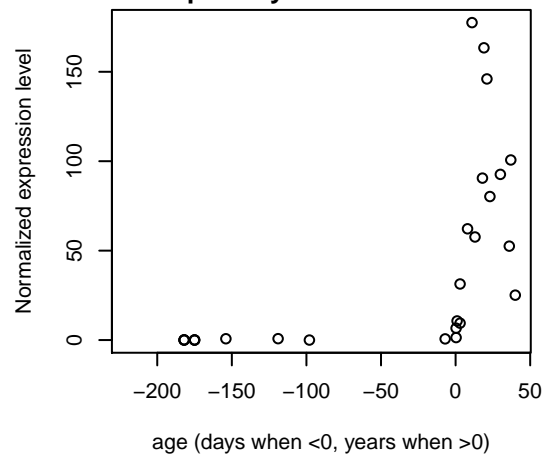

**CNDP1\_72250796\_72250944**  
(P=1e-04, Diff = -64.75)  
primary motor cortex

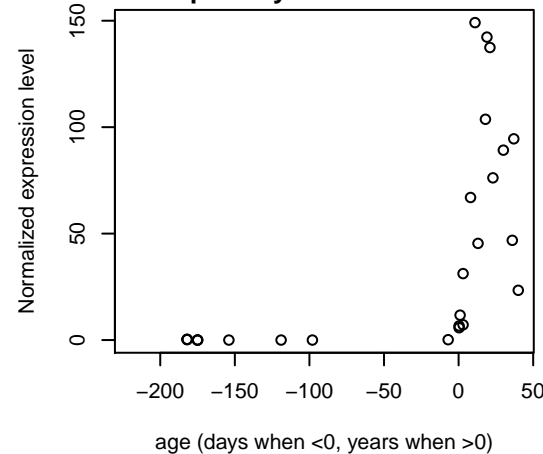

**CNDP1\_72251731\_72252261**  
(P=1e-04, Diff = -39.49)  
primary motor cortex

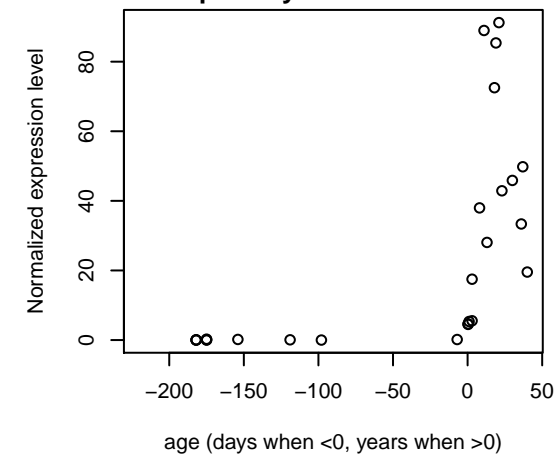



**TOX3\_52471917\_52473880**  
( $P=3e-04$ , Diff = 13.7)  
primary motor cortex

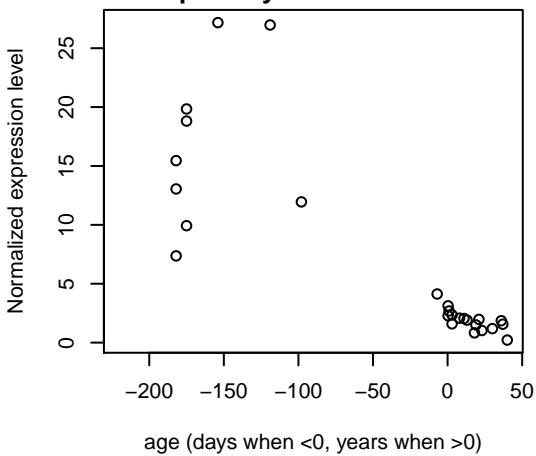

**TOX3\_52478187\_52478268**  
( $P=4e-04$ , Diff = 13.15)  
primary motor cortex

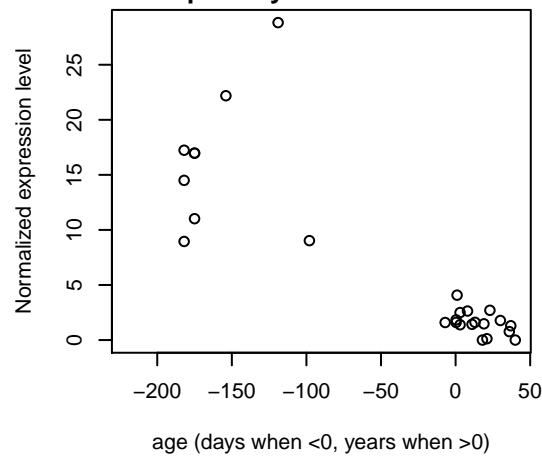

**TOX3\_52479905\_52480133**  
( $P=8e-04$ , Diff = 13.3)  
primary motor cortex

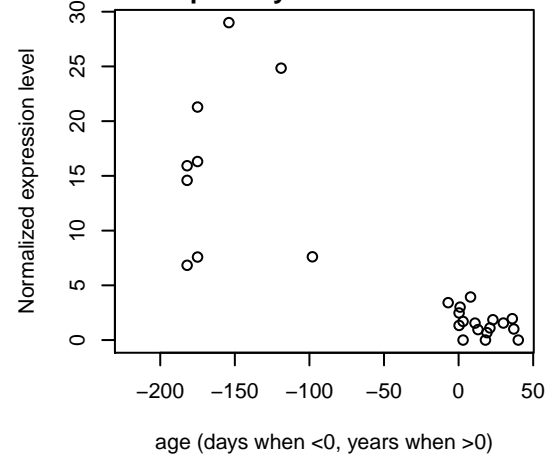

**TOX3\_52484188\_52484458**  
( $P=4e-04$ , Diff = 13.82)  
primary motor cortex

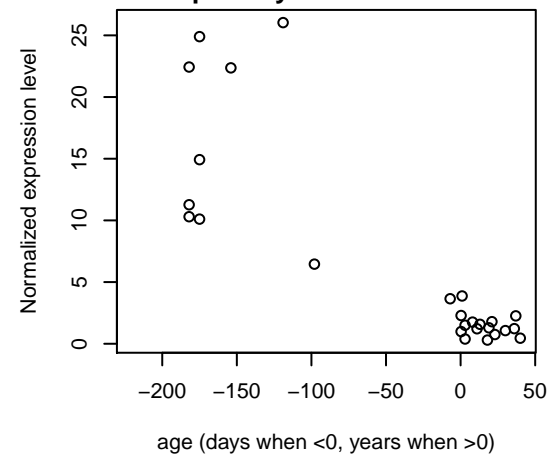

**TOX3\_52497845\_52498100**  
( $P=5e-04$ , Diff = 16.18)  
primary motor cortex

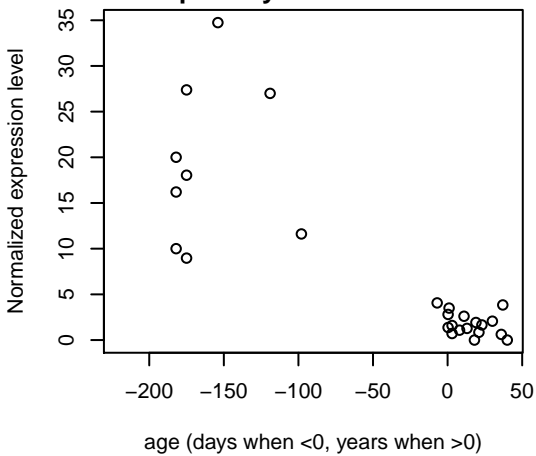

**TOX3\_52502420\_52502486**  
( $P=2e-04$ , Diff = 9.58)  
primary motor cortex

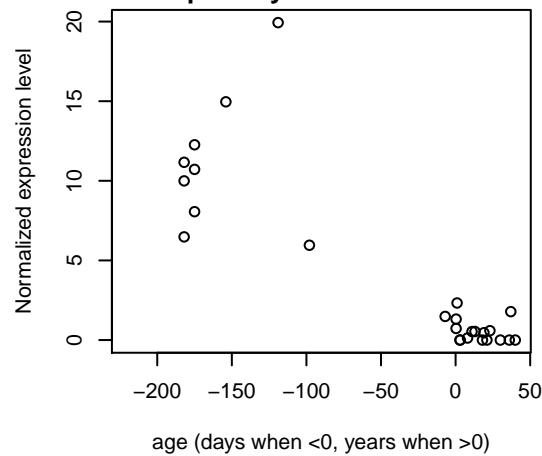

**TOX3\_52553317\_52553491**  
( $P=0.8632$ , Diff = 0.01)  
primary motor cortex

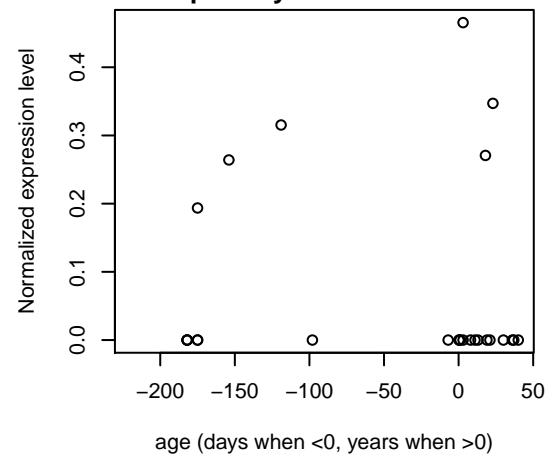

**TOX3\_52580548\_52580806**  
( $P=3e-04$ , Diff = 2.69)  
primary motor cortex

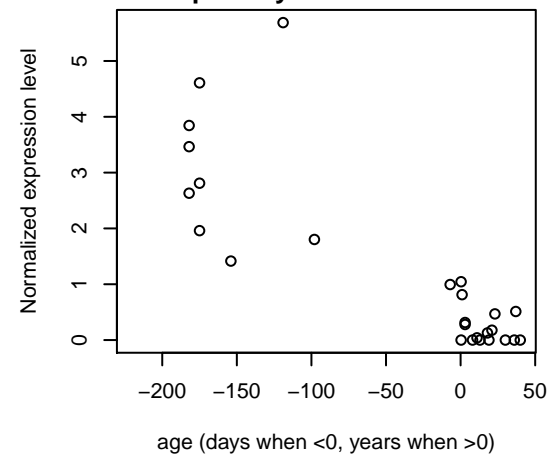

**TOX3\_52581625\_52581714**  
( $P=0.9946$ , Diff = 0)  
primary motor cortex

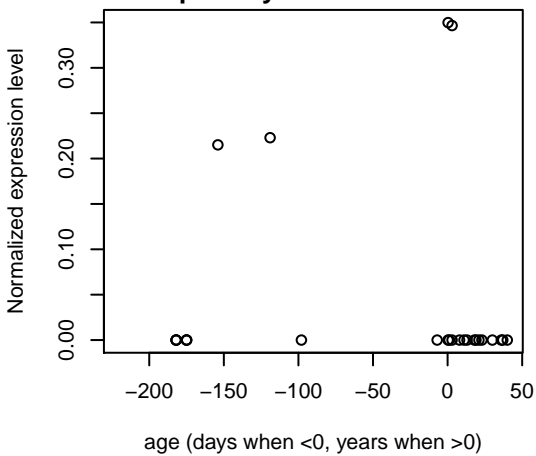

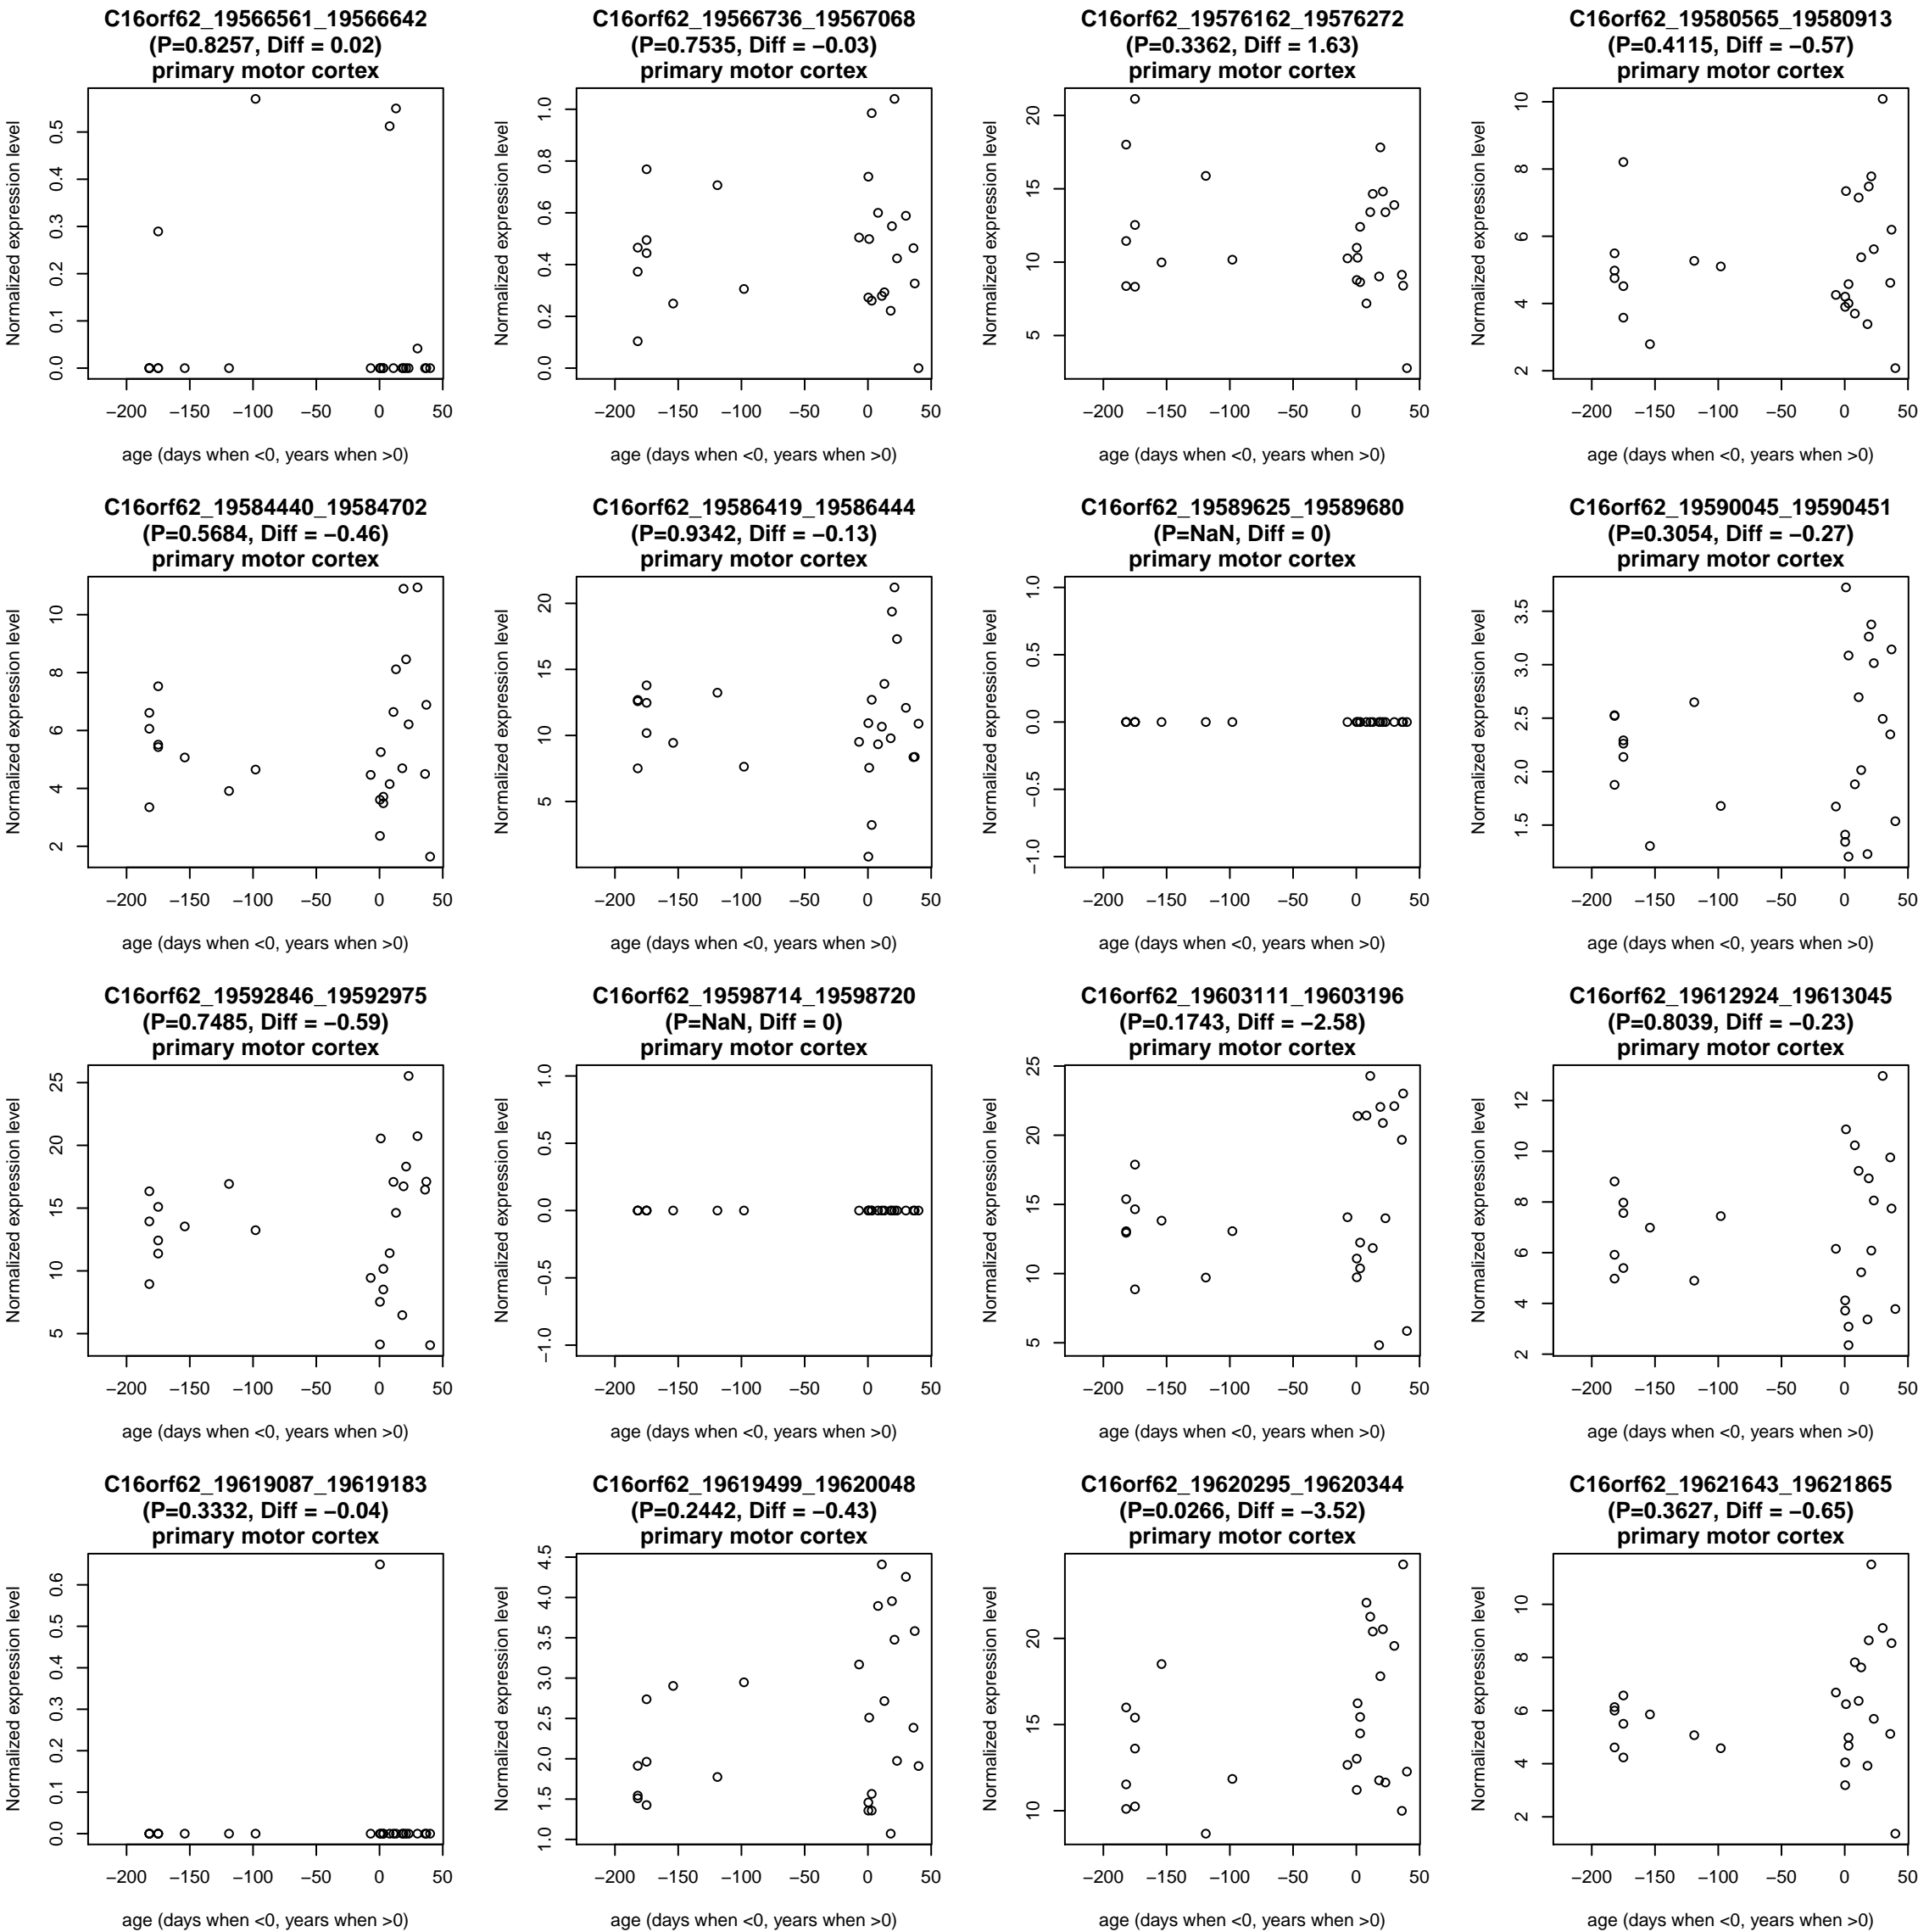

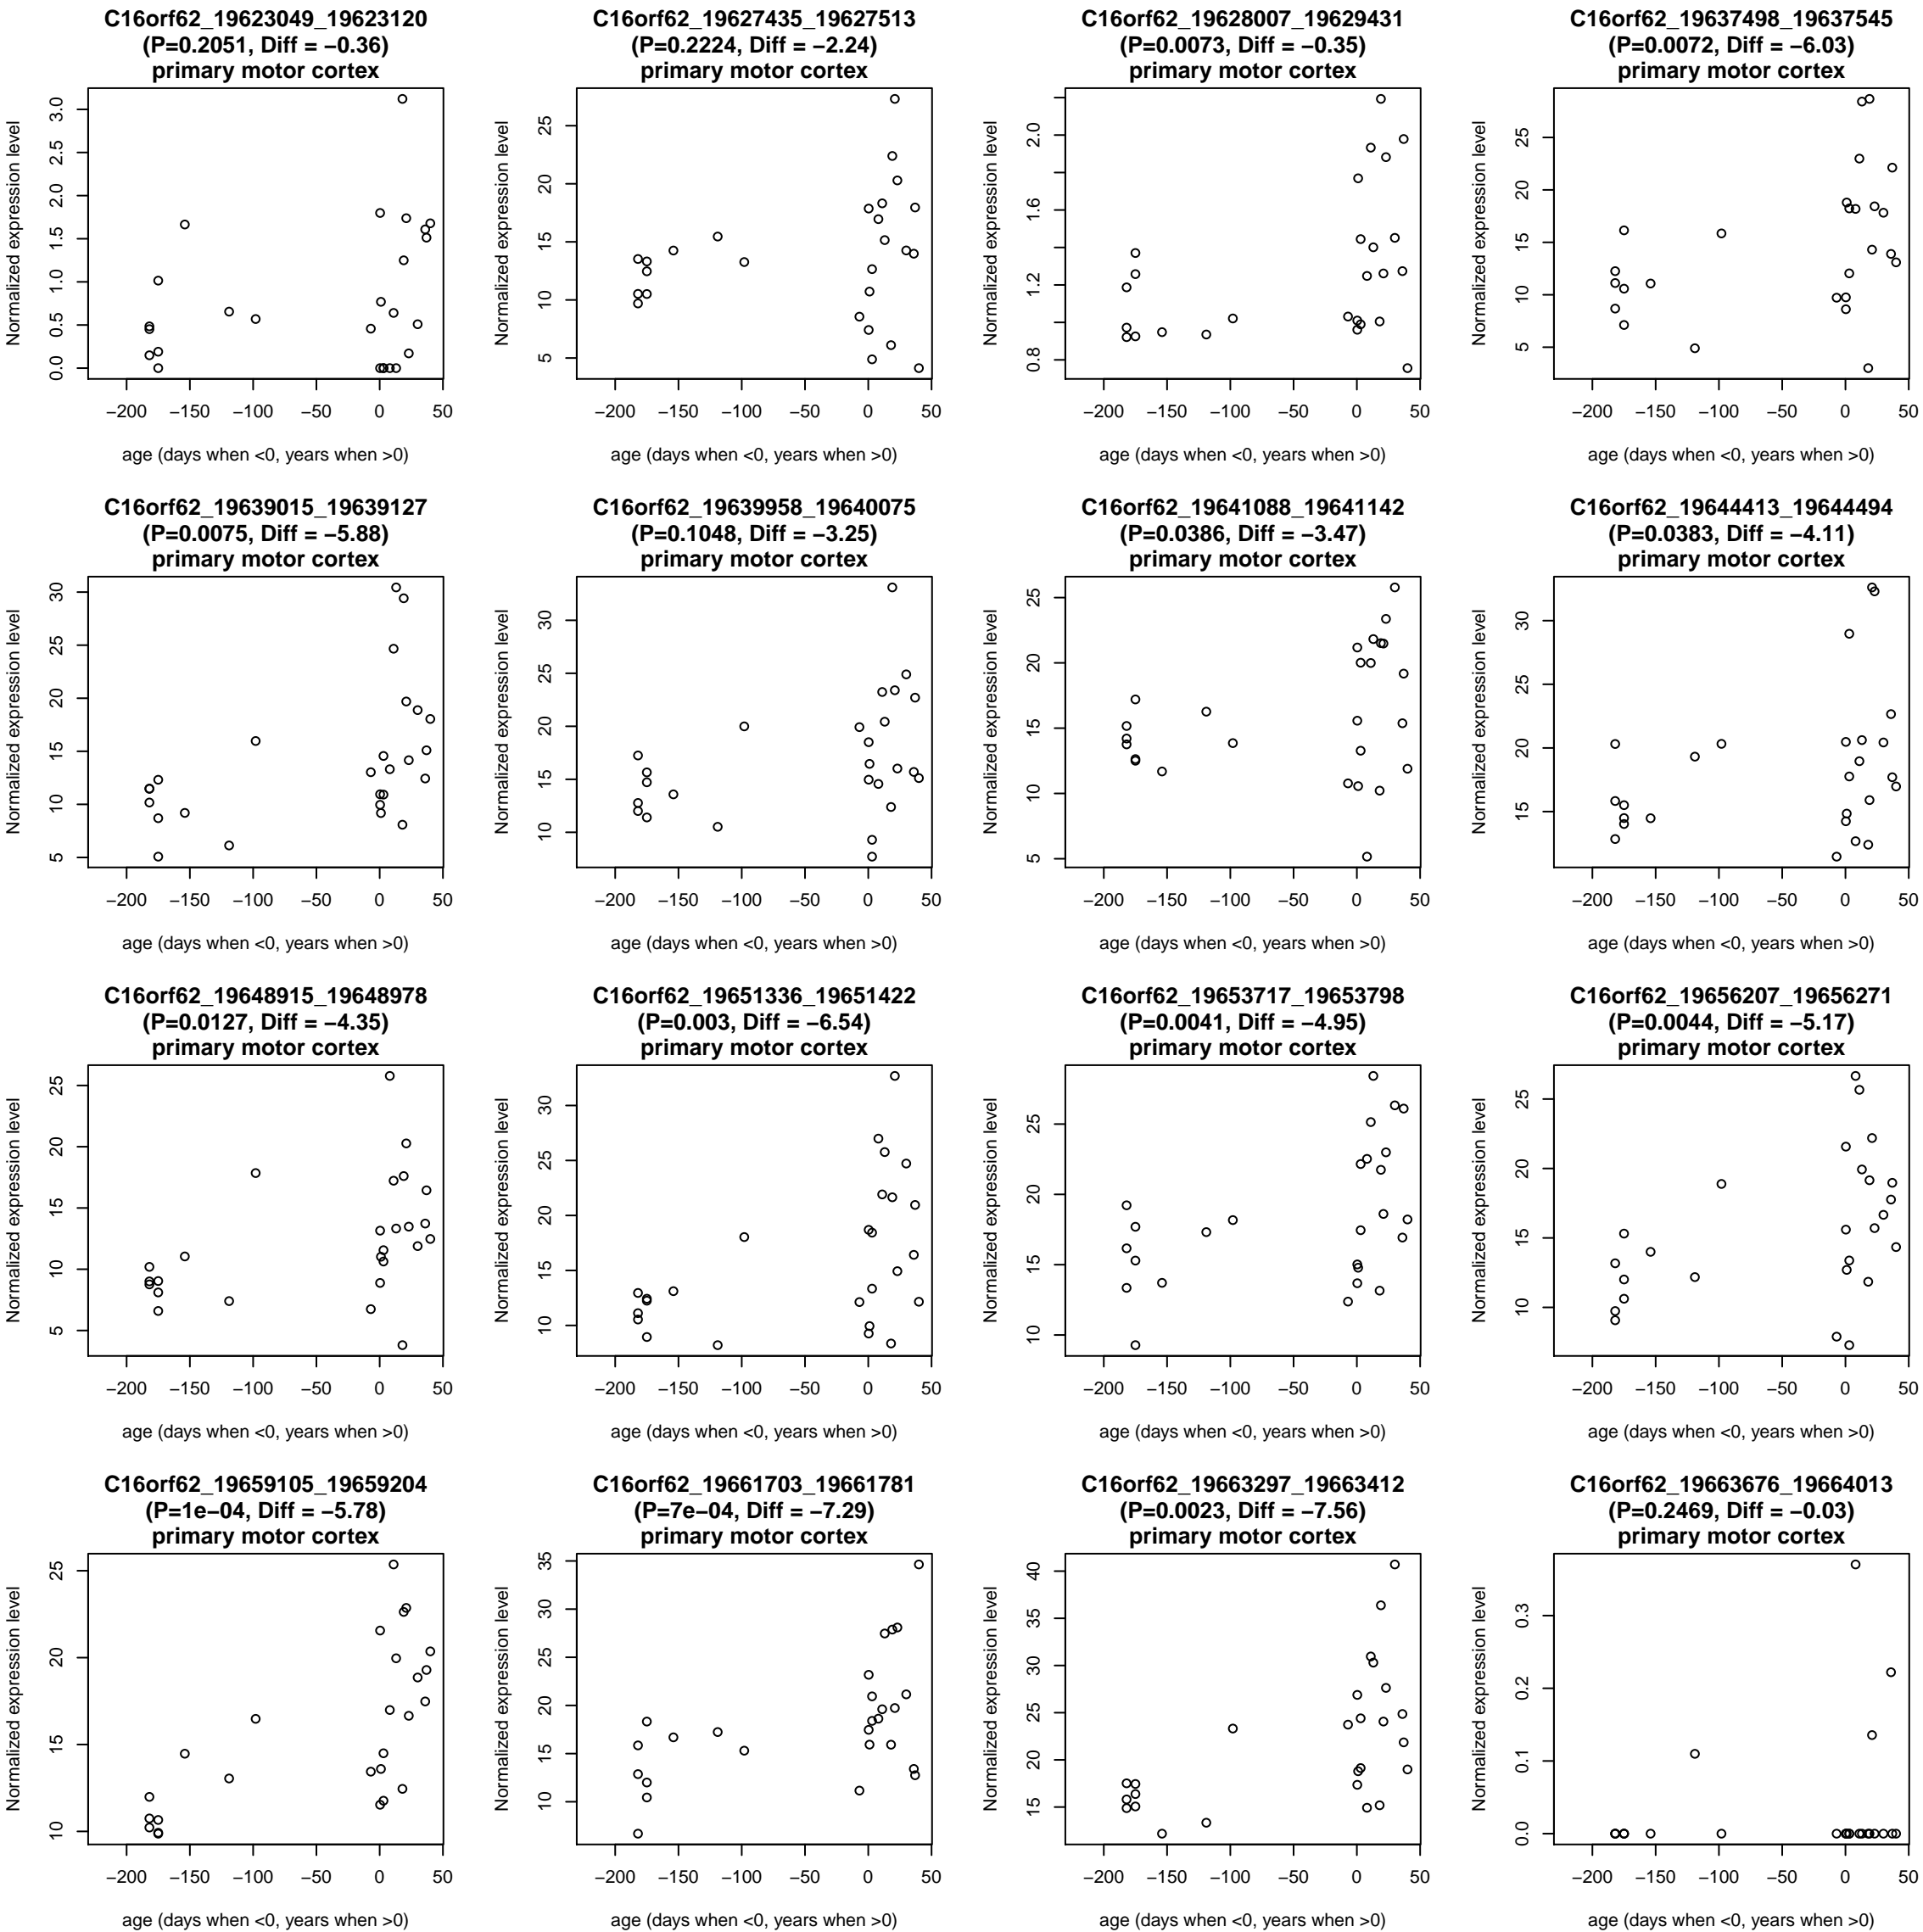

**C16orf62\_19680481\_19680621**  
( $P=0.0033$ , Diff =  $-6.98$ )  
primary motor cortex

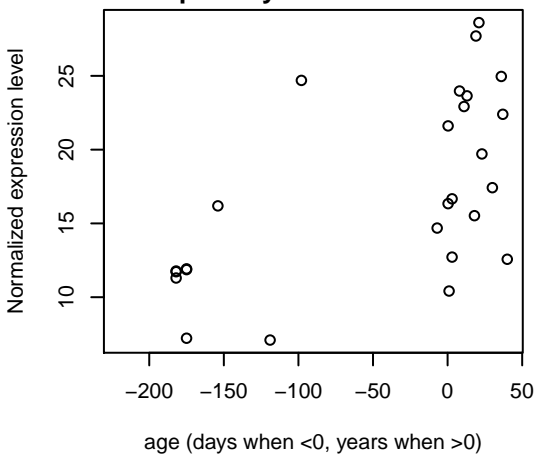

**C16orf62\_19693546\_19693712**  
( $P=1e-04$ , Diff =  $-9.32$ )  
primary motor cortex

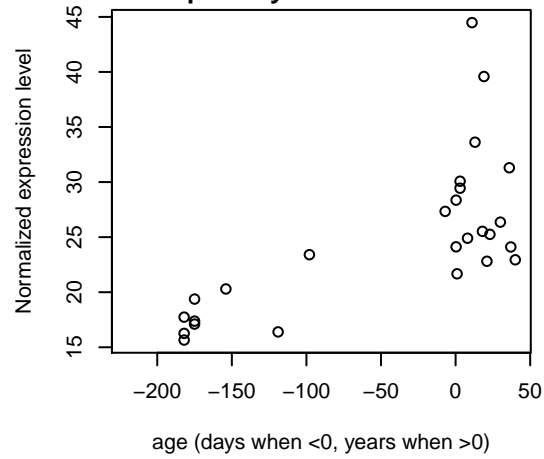

**C16orf62\_19702674\_19702793**  
( $P=7e-04$ , Diff =  $-13.13$ )  
primary motor cortex

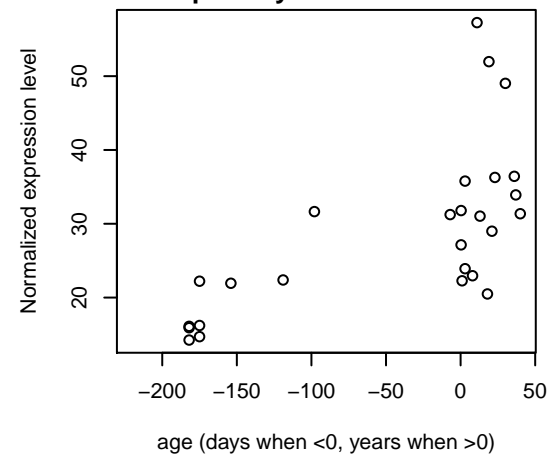

**C16orf62\_19710823\_19710970**  
( $P=0.001$ , Diff =  $-14.61$ )  
primary motor cortex

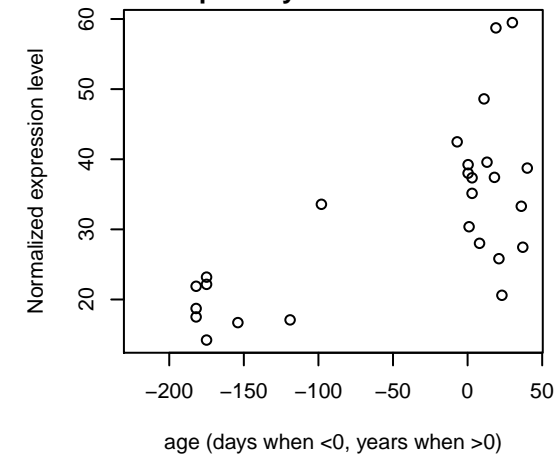

**C16orf62\_19711699\_19712448**  
( $P=6e-04$ , Diff =  $-4.27$ )  
primary motor cortex

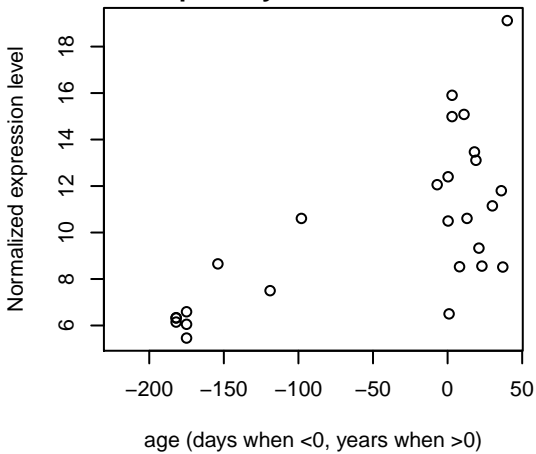

**C16orf62\_19716437\_19716880**  
( $P=0.0018$ , Diff =  $1.62$ )  
primary motor cortex

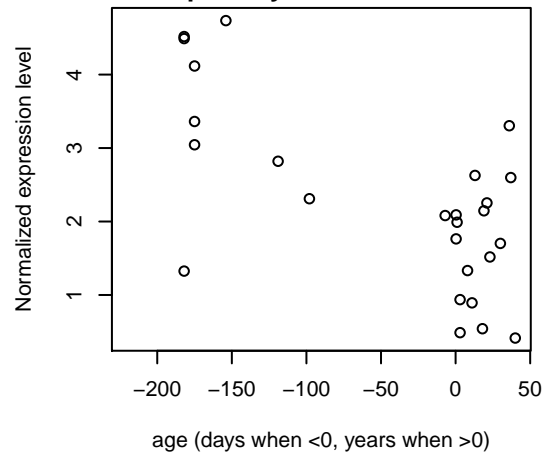

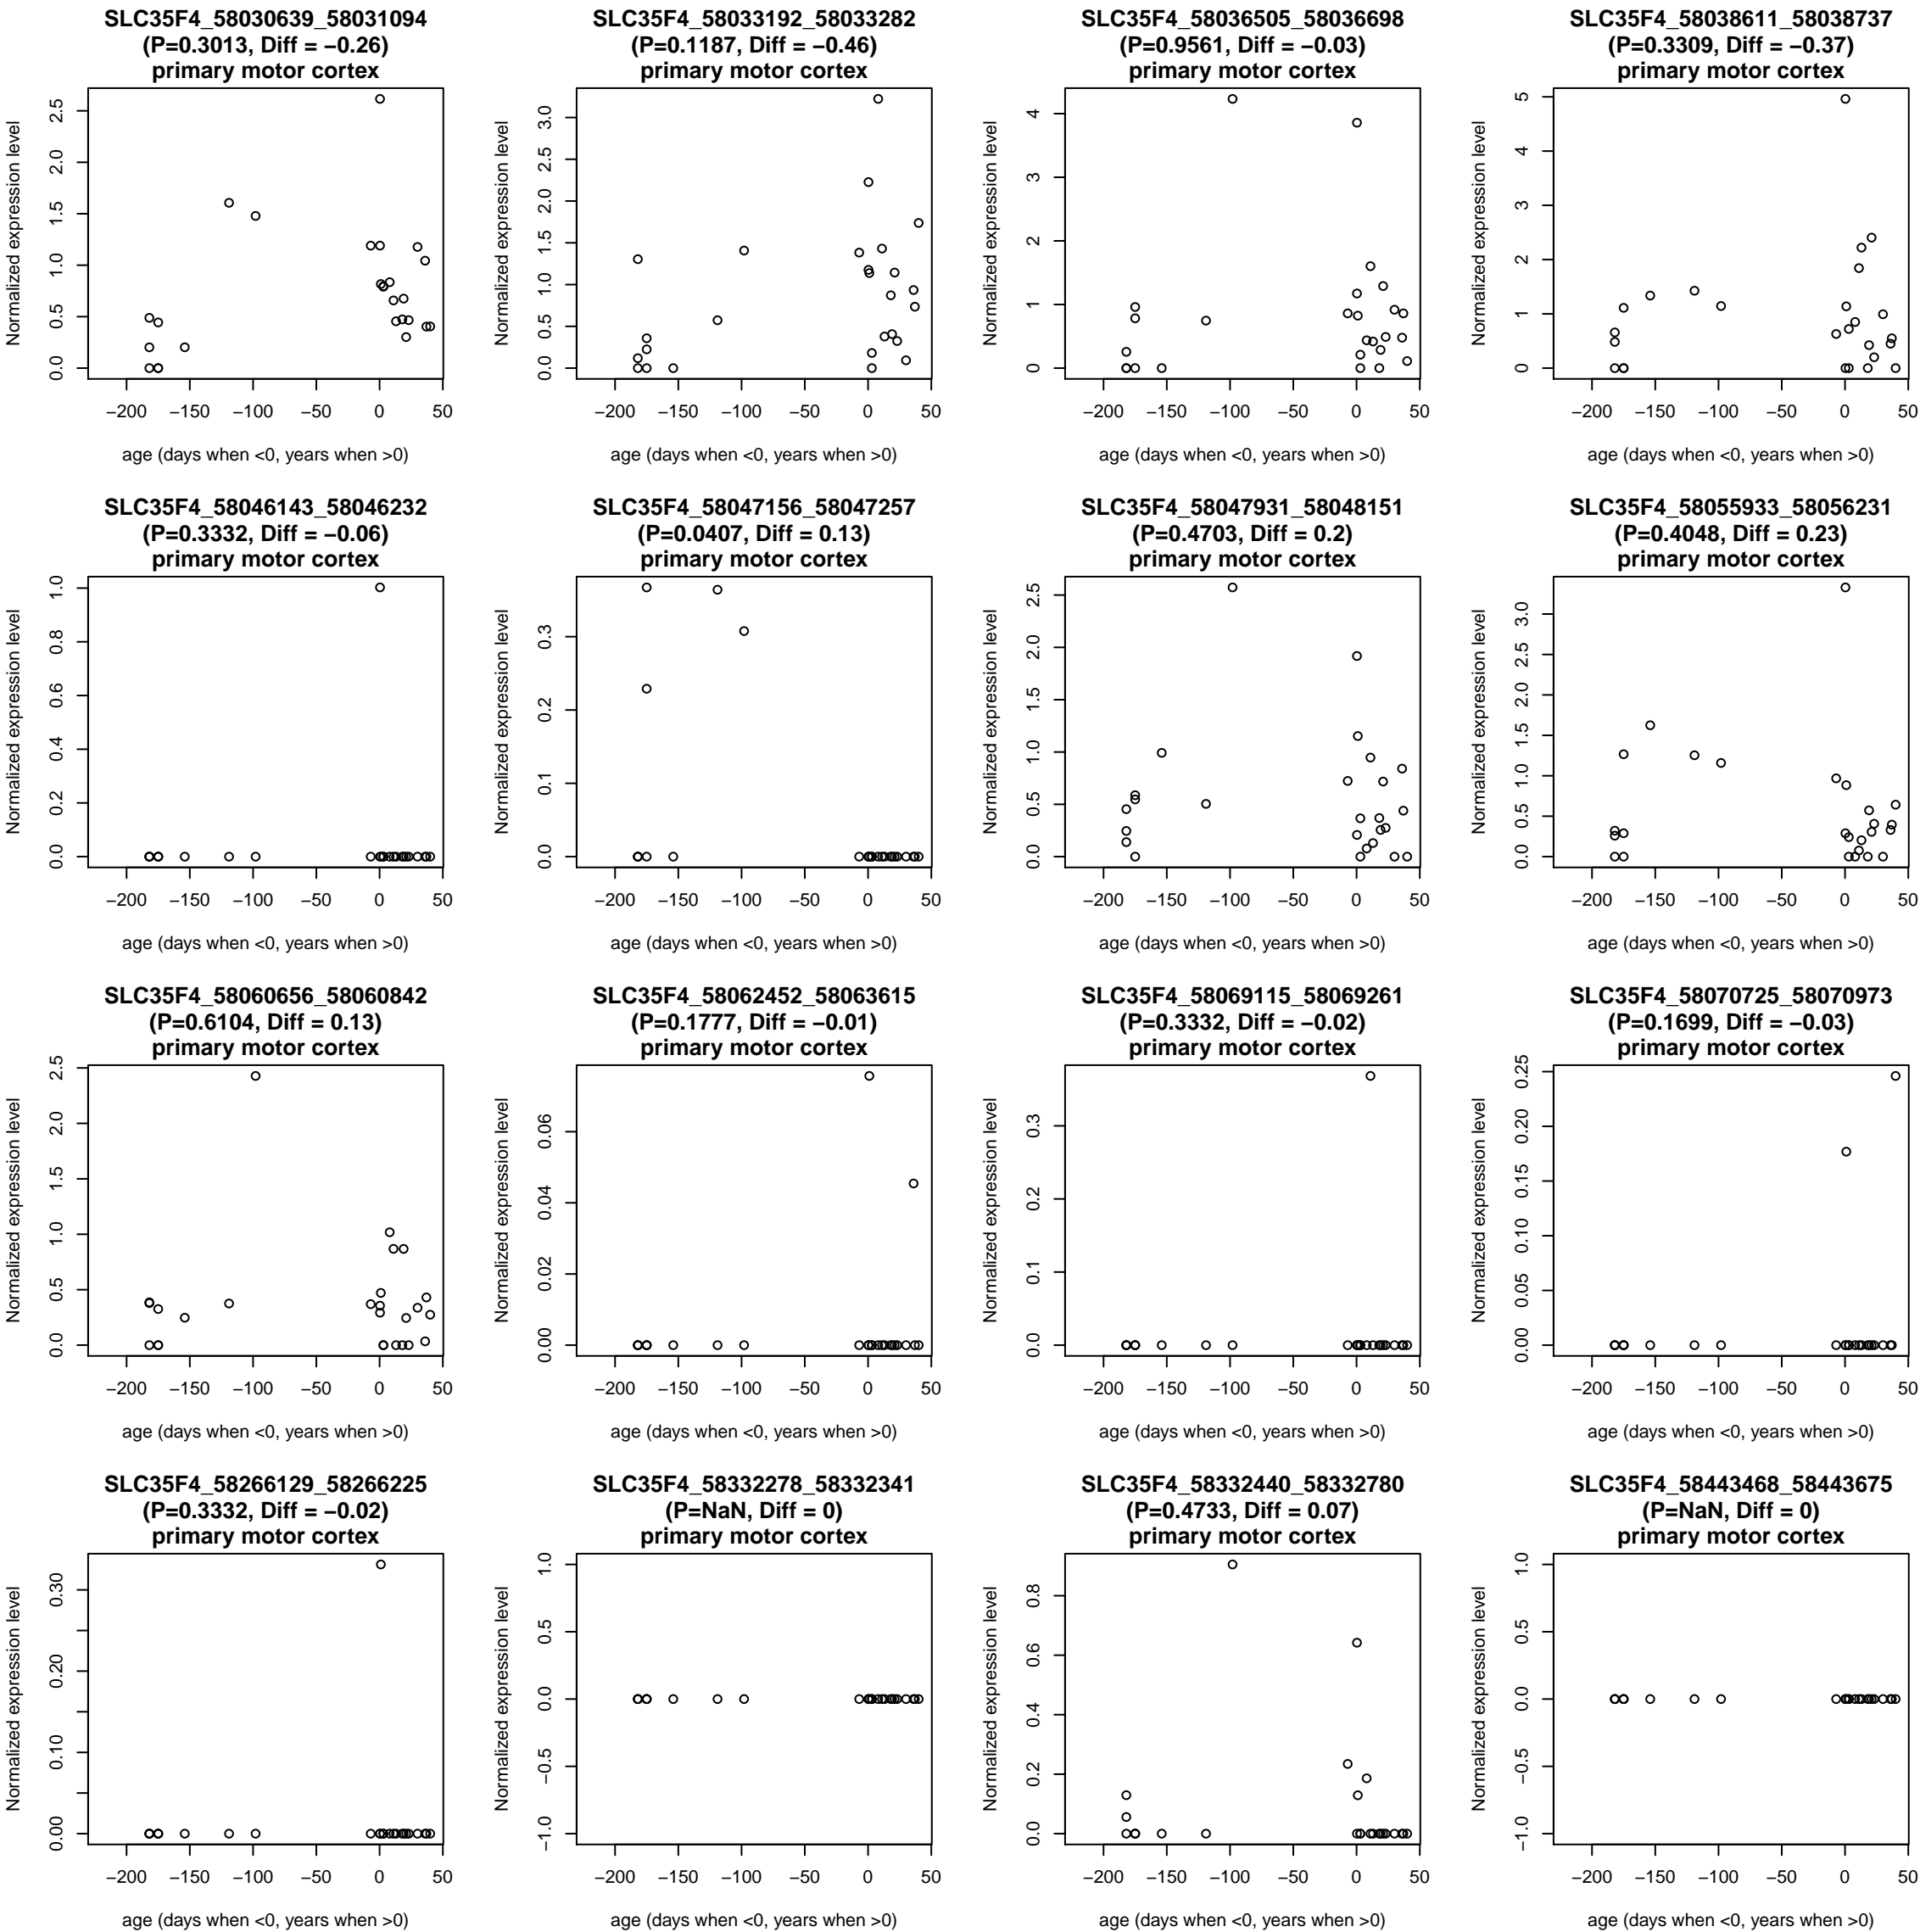

**SLC35F4\_58448630\_58448912**  
**(P=0.2282, Diff = -0.01)**  
**primary motor cortex**

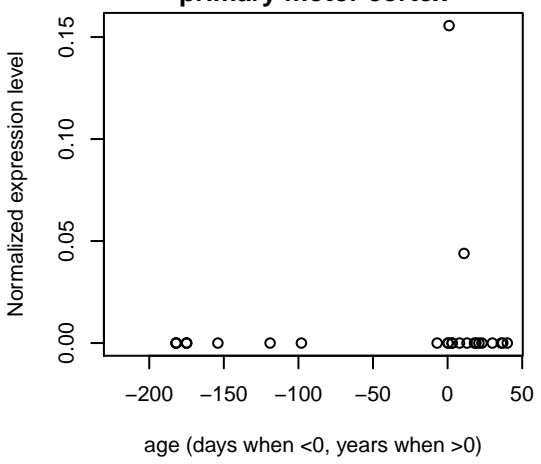

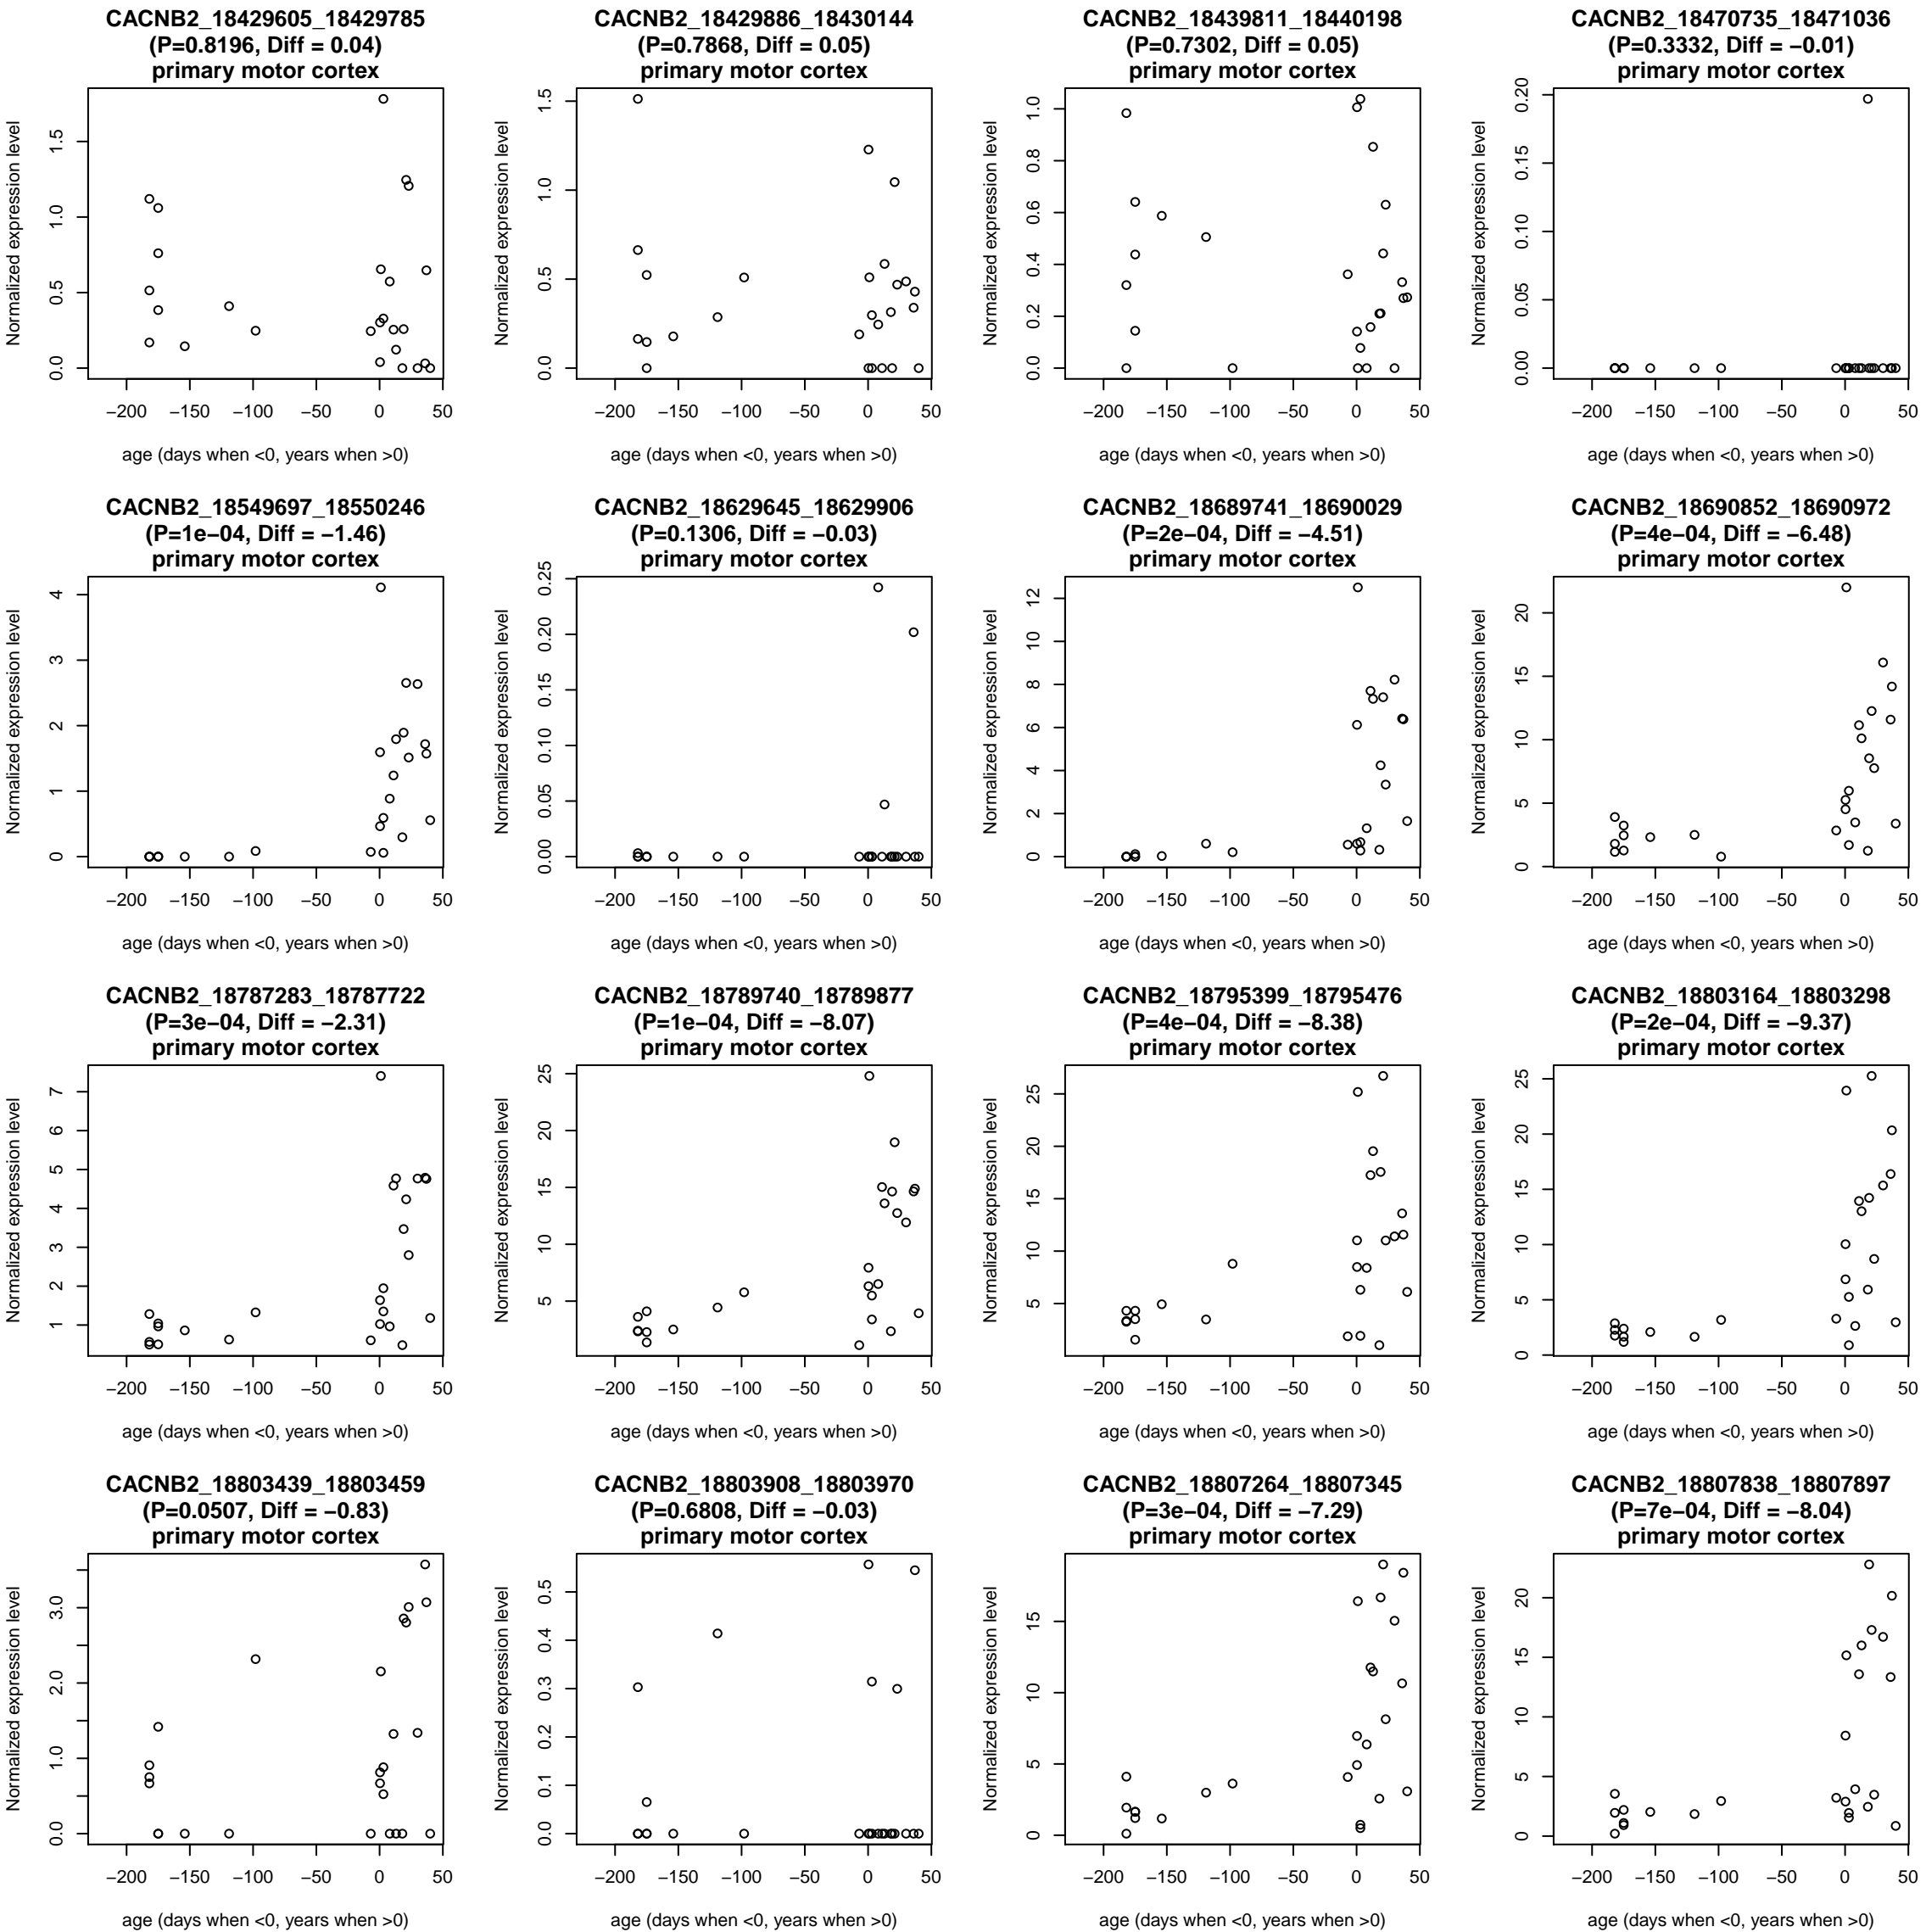

**CACNB2\_18816516\_18816626**  
( $P=1e-04$ , Diff = -9.52)  
primary motor cortex

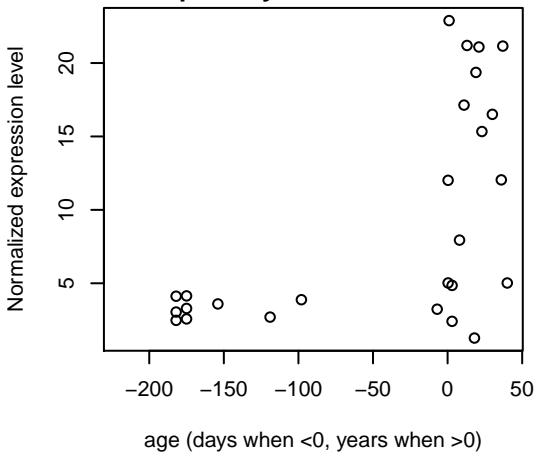

**CACNB2\_18823004\_18823156**  
( $P=2e-04$ , Diff = -7.84)  
primary motor cortex

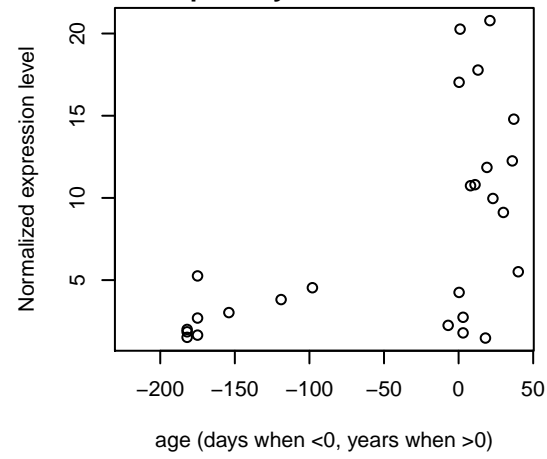

**CACNB2\_18825029\_18825125**  
( $P=1e-04$ , Diff = -9.78)  
primary motor cortex

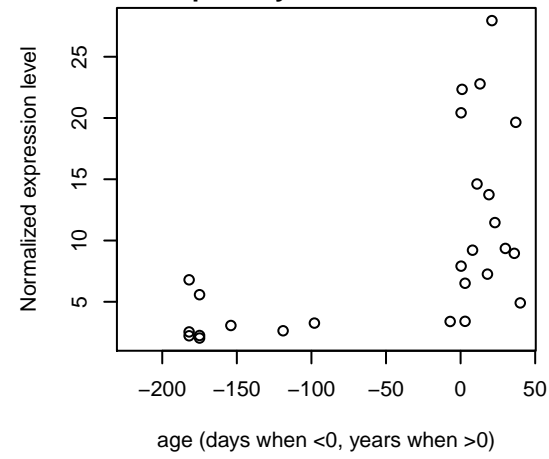

**CACNB2\_18827108\_18827294**  
( $P=1e-04$ , Diff = -12.15)  
primary motor cortex

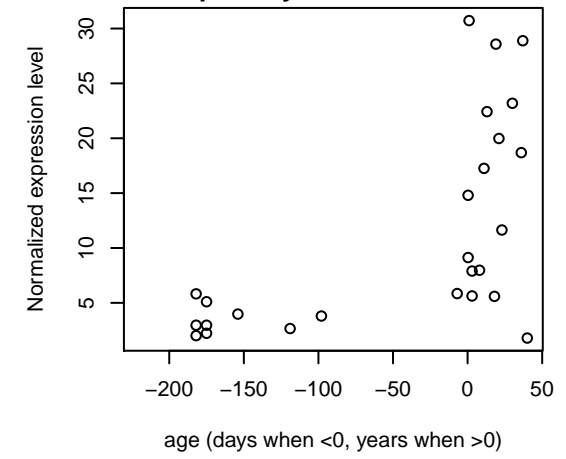

**CACNB2\_18828158\_18830798**  
( $P=0$ , Diff = -8.65)  
primary motor cortex

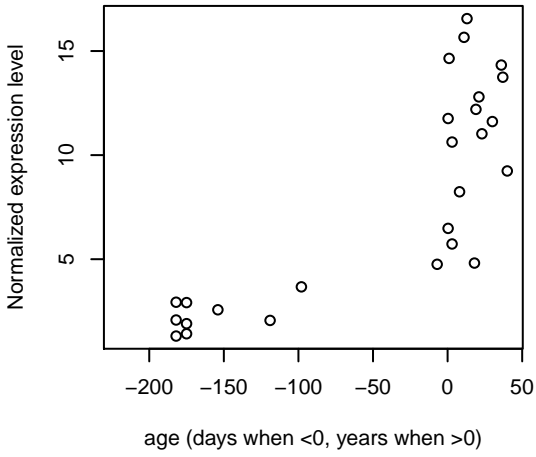



**CTH\_70876900\_70877266**  
(P=0.8118, Diff = -0.1)  
primary motor cortex

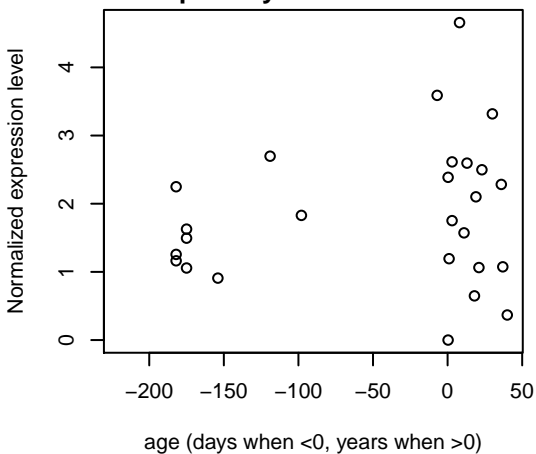

**CTH\_70881638\_70881720**  
(P=0.2326, Diff = 0.55)  
primary motor cortex

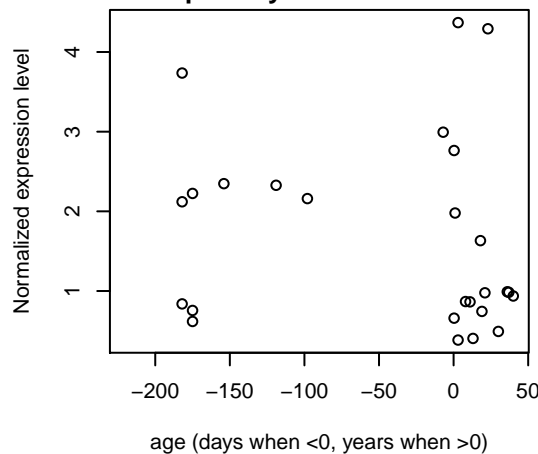

**CTH\_70883619\_70883715**  
(P=0.6097, Diff = -0.22)  
primary motor cortex

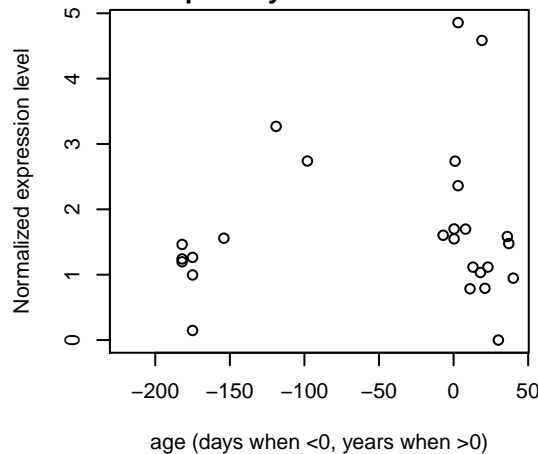

**CTH\_70887248\_70887358**  
(P=0.9458, Diff = 0.03)  
primary motor cortex

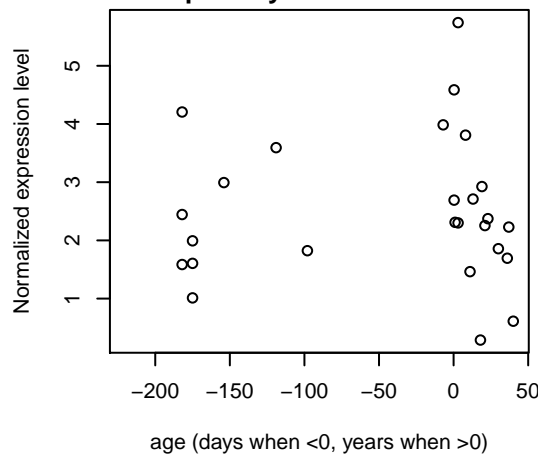

**CTH\_70889967\_70890099**  
(P=0.5992, Diff = -0.3)  
primary motor cortex

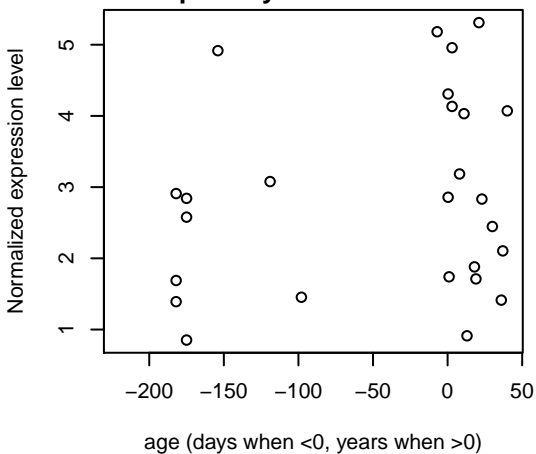

**CTH\_70895476\_70895534**  
(P=0.2032, Diff = -0.58)  
primary motor cortex

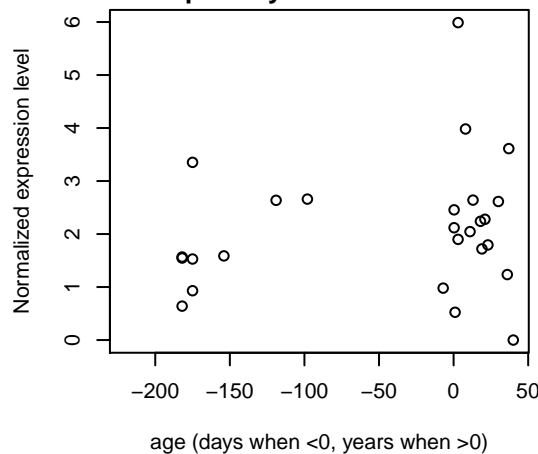

**CTH\_70895999\_70896077**  
(P=0.8851, Diff = -0.08)  
primary motor cortex

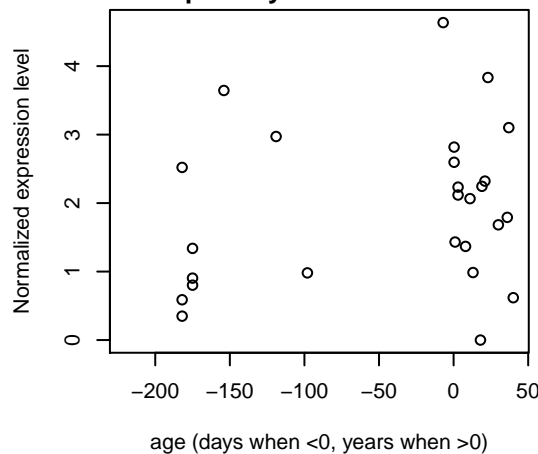

**CTH\_70897765\_70897918**  
(P=0.2473, Diff = -0.89)  
primary motor cortex

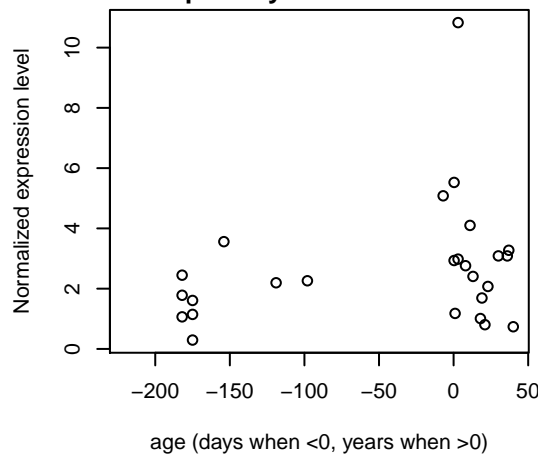

**CTH\_70899510\_70899632**  
(P=0.2083, Diff = -0.93)  
primary motor cortex

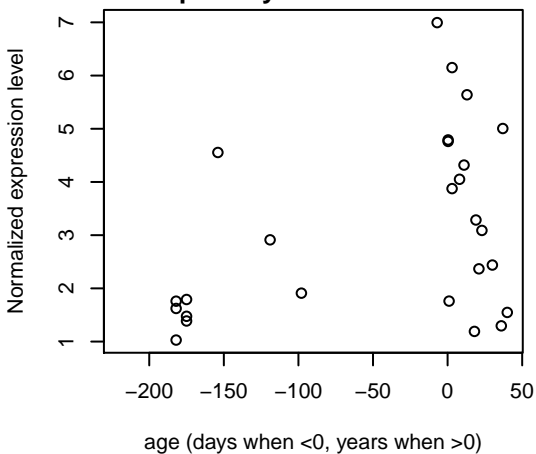

**CTH\_70900533\_70900860**  
(P=0.0991, Diff = -0.27)  
primary motor cortex

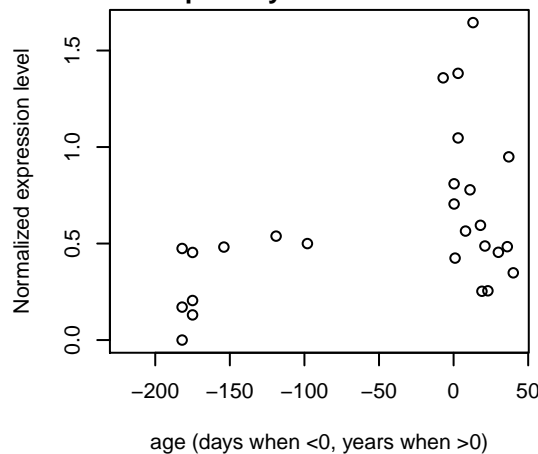

**CTH\_70904370\_70904509**  
(P=0.3387, Diff = -1.33)  
primary motor cortex

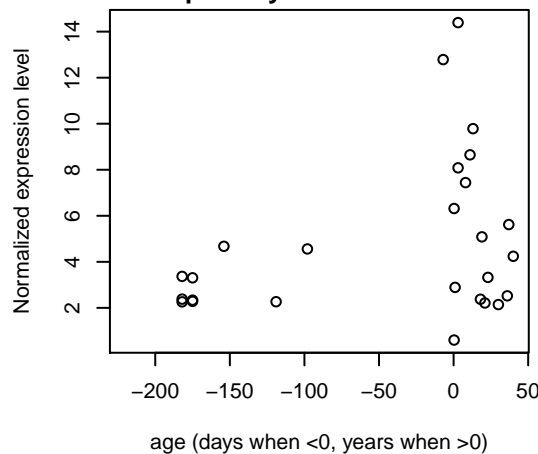

**CTH\_70904783\_70905534**  
(P=0.0994, Diff = -0.59)  
primary motor cortex

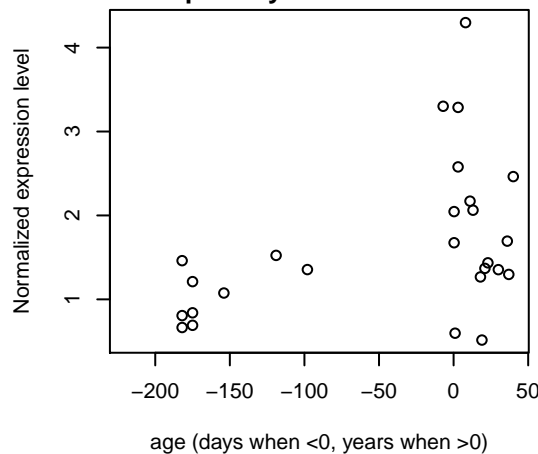

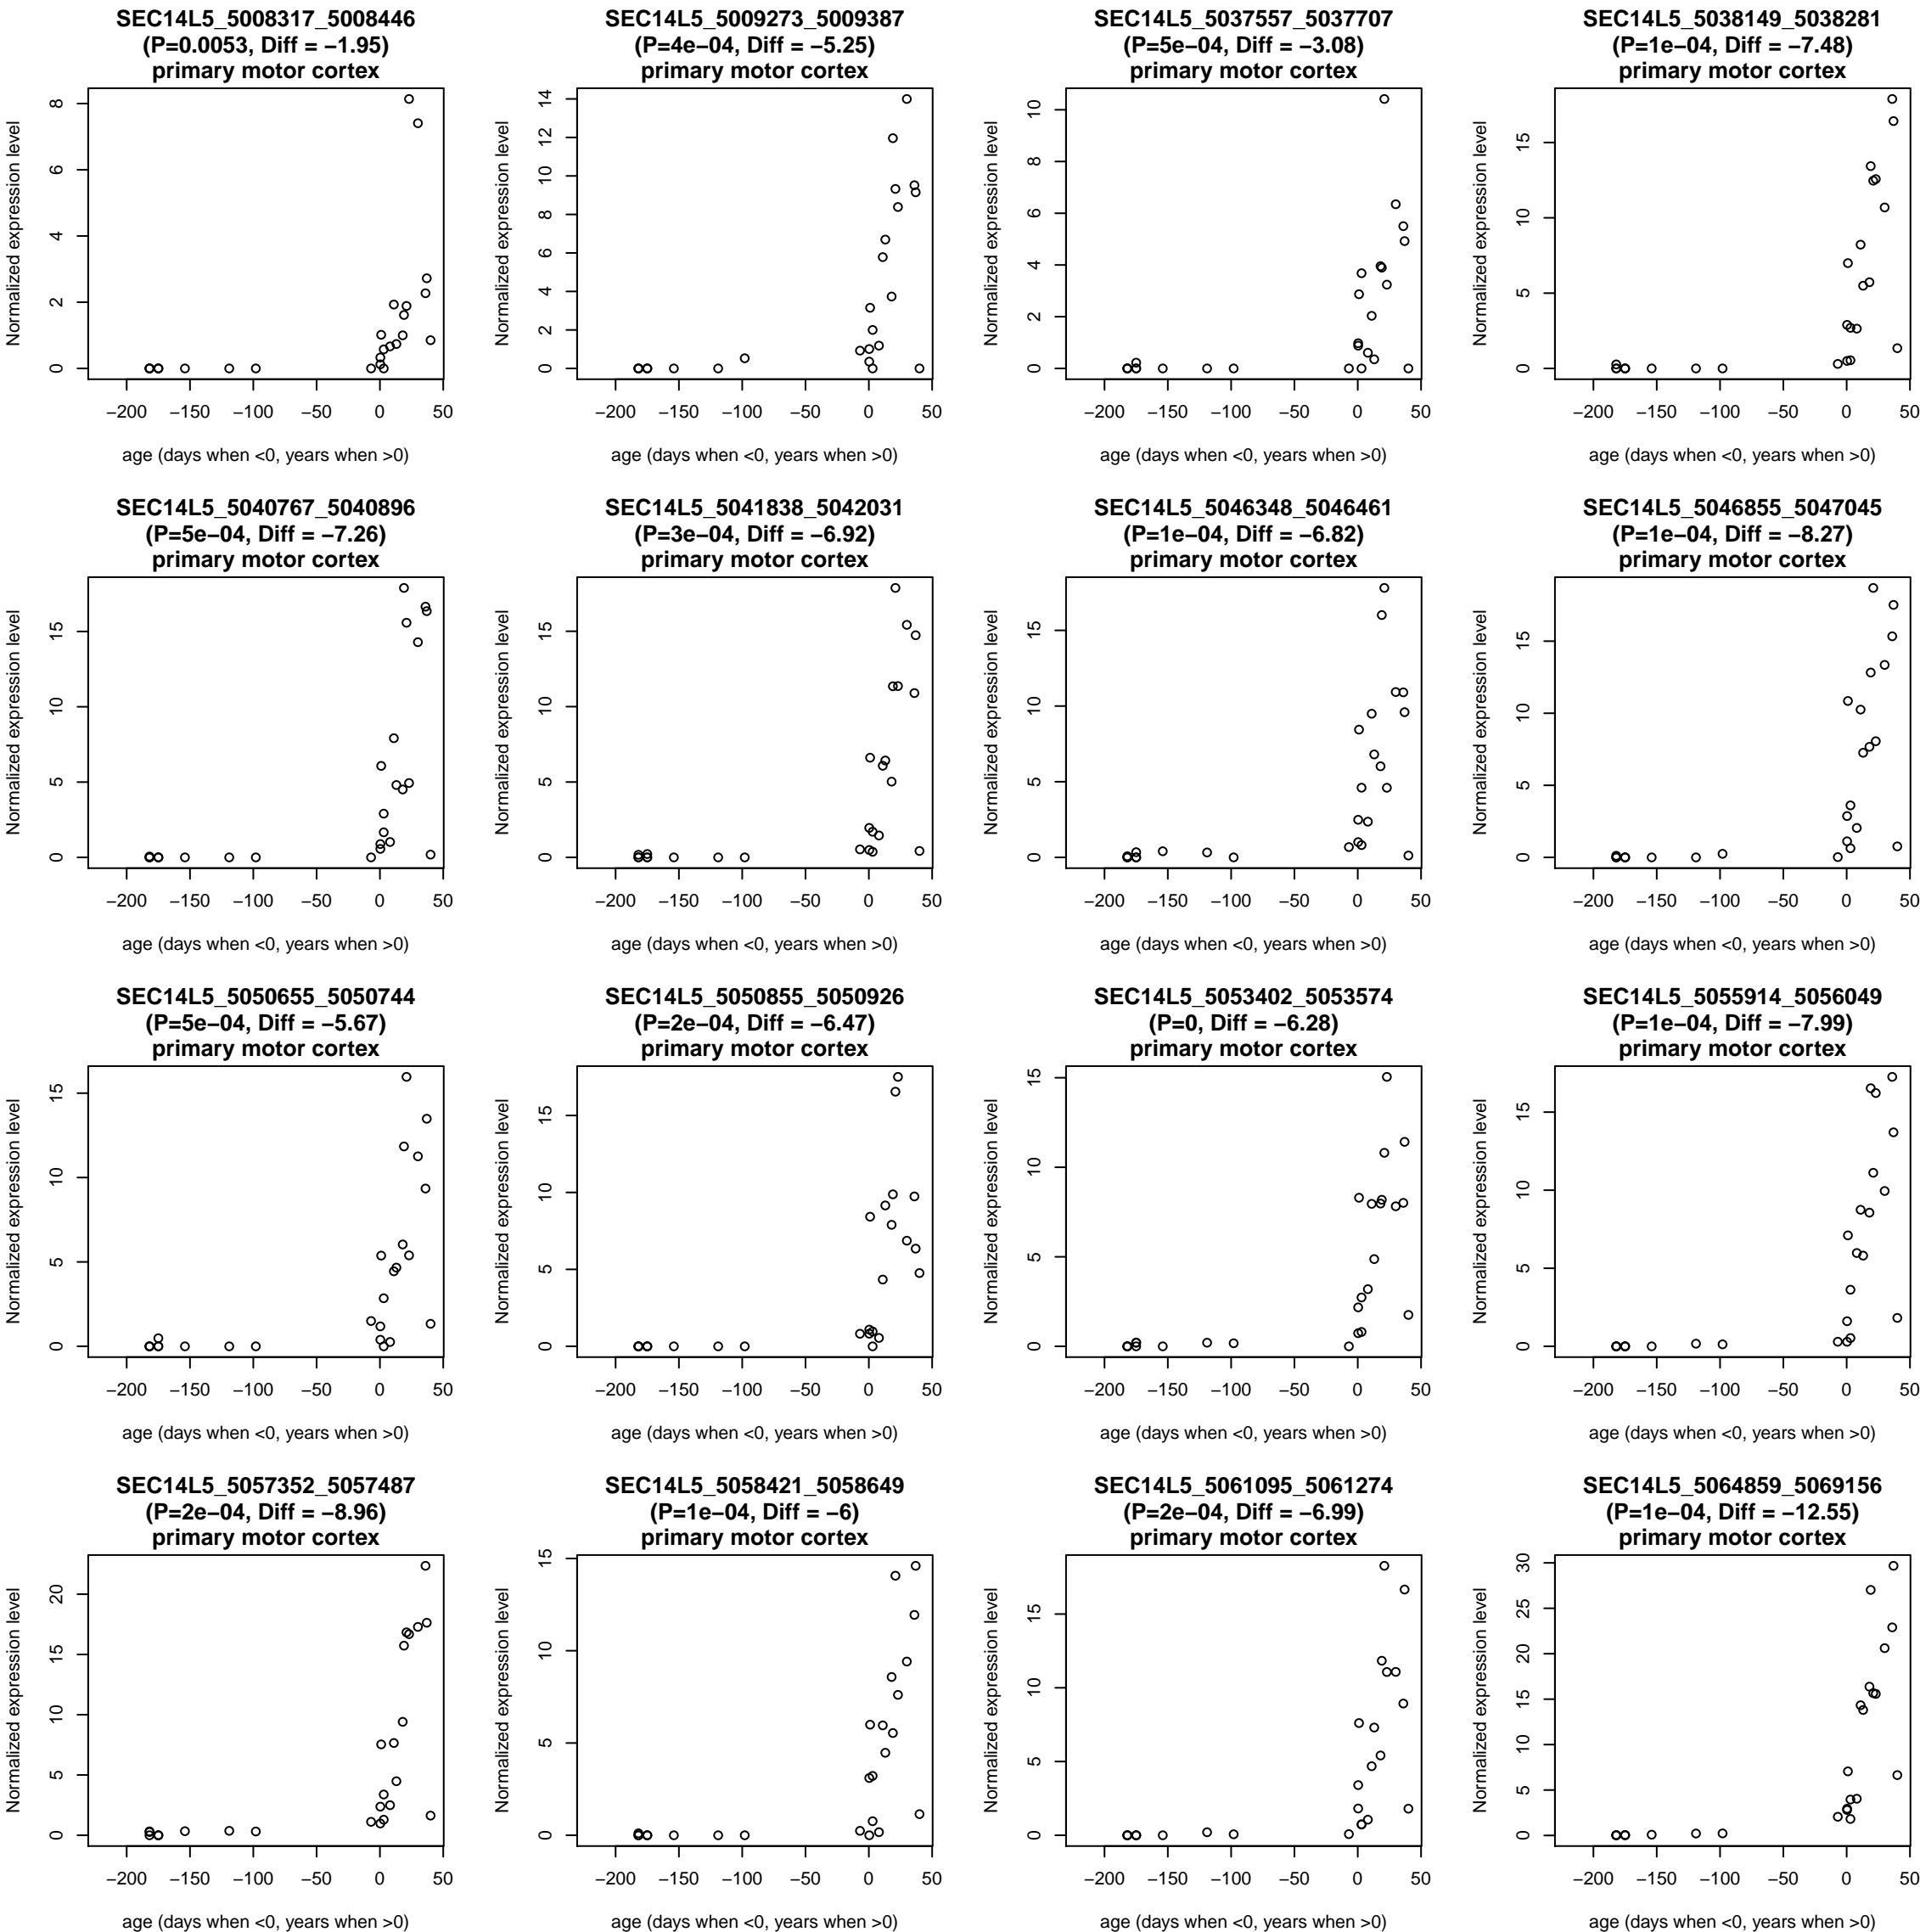

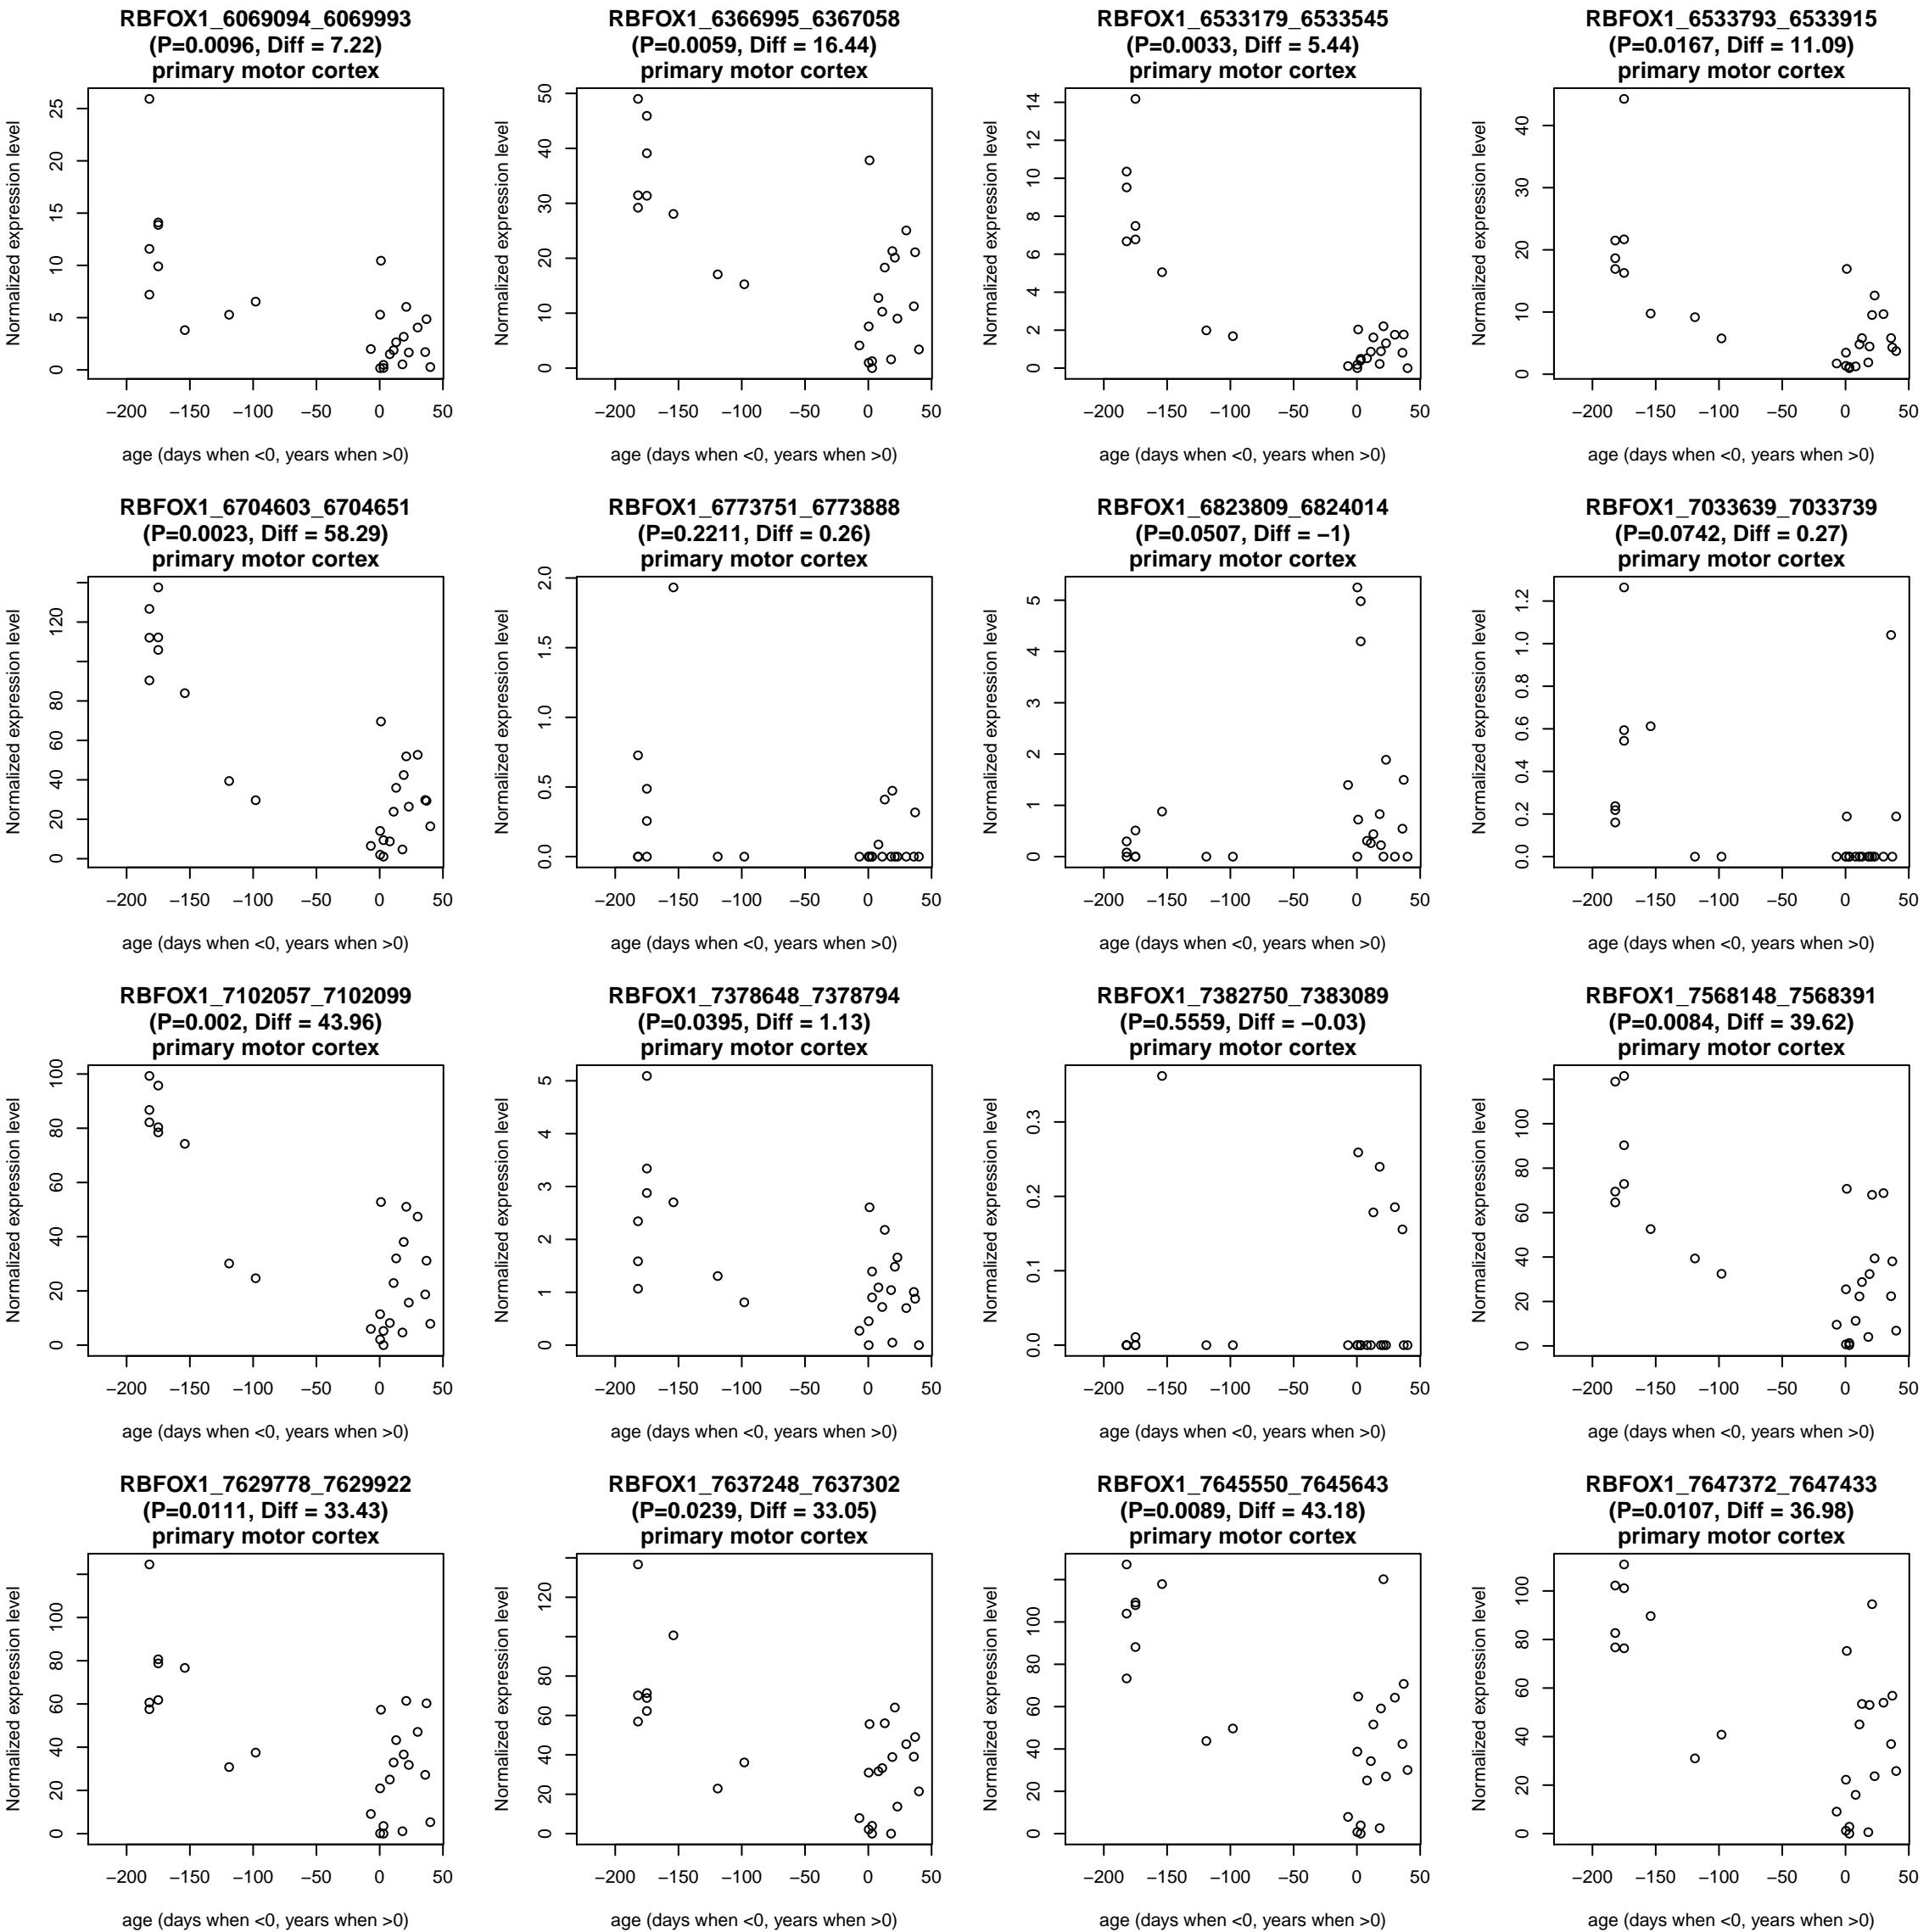

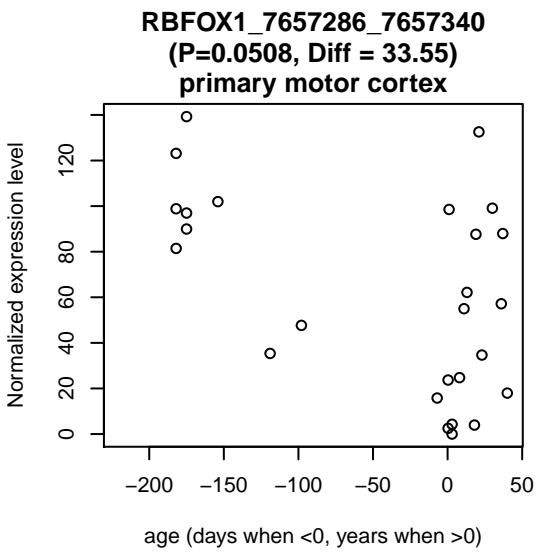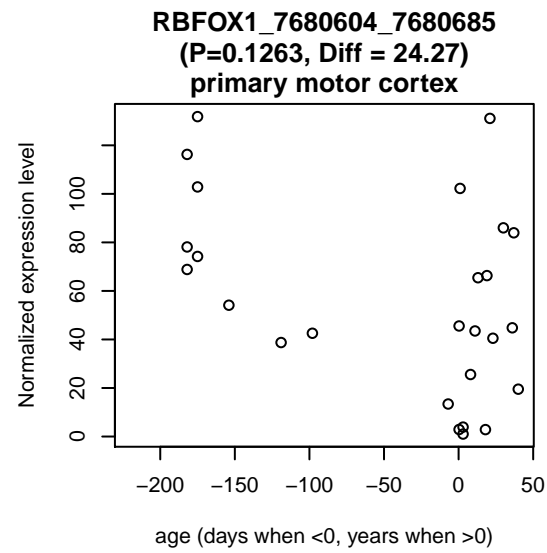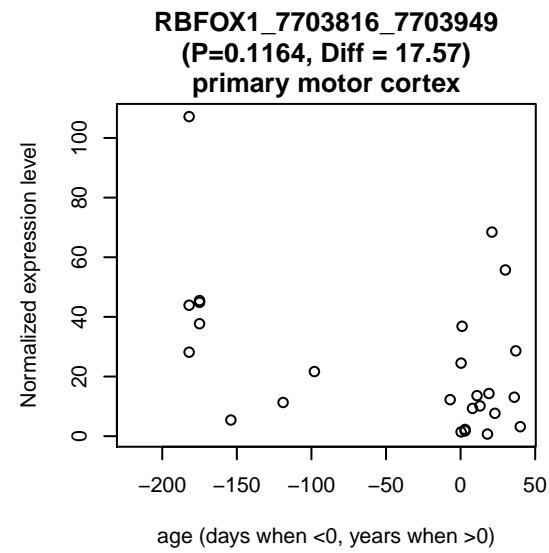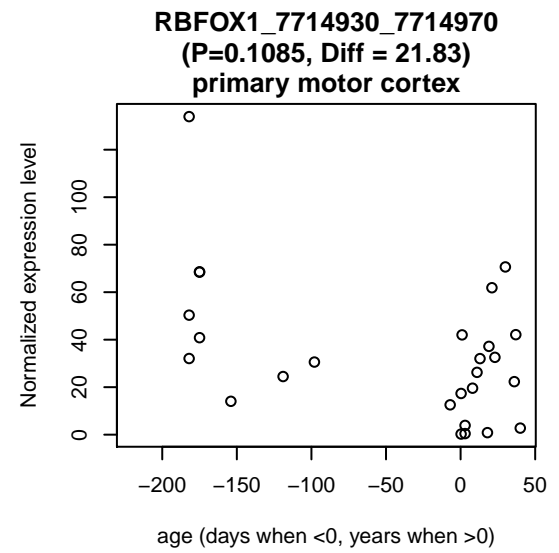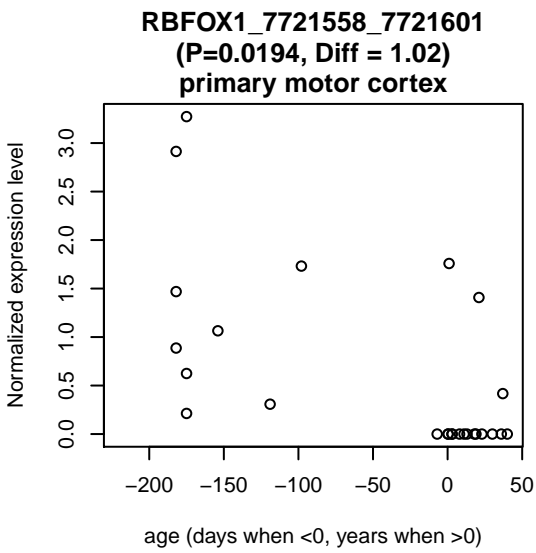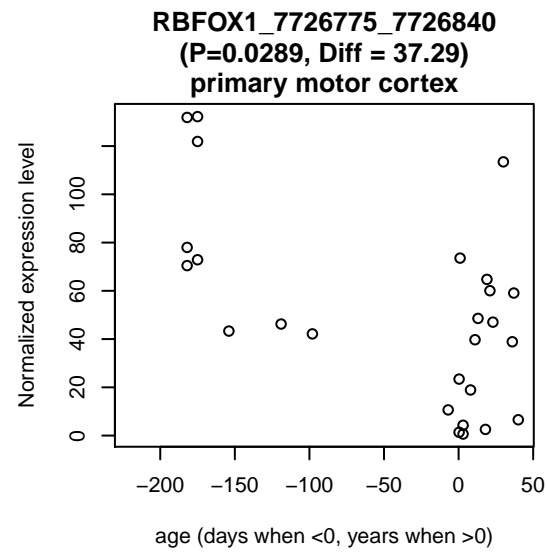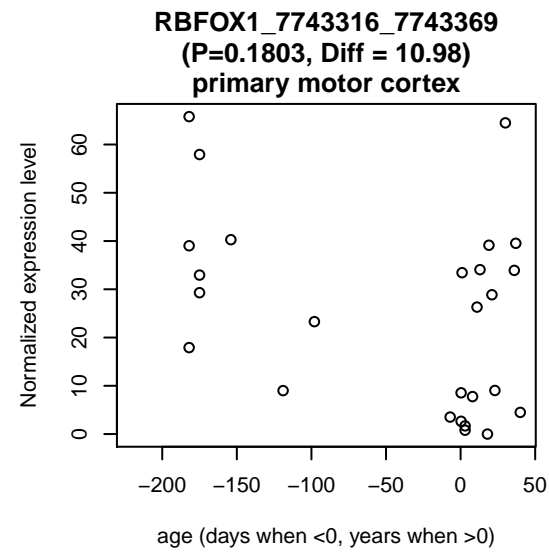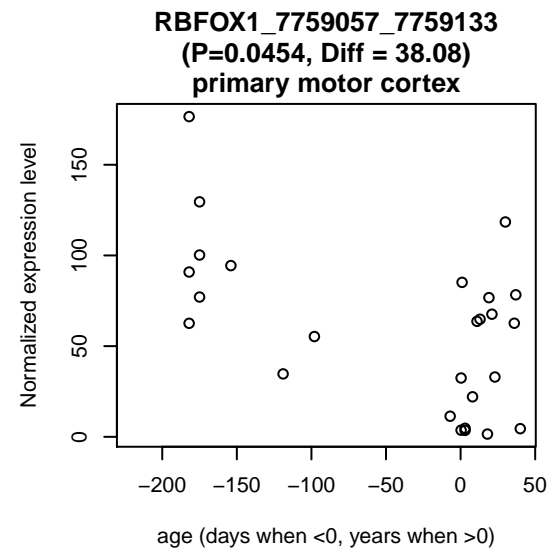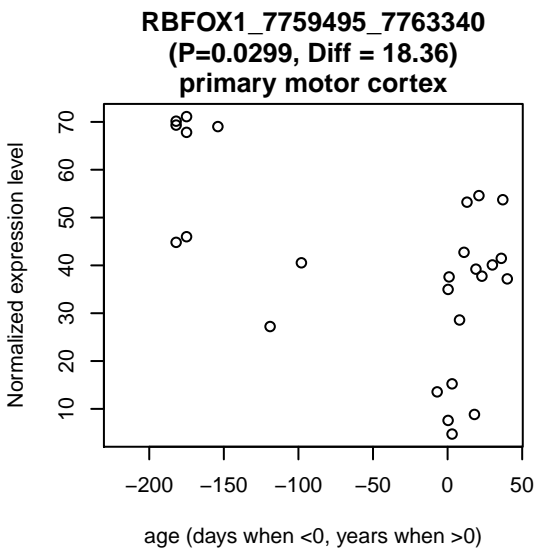

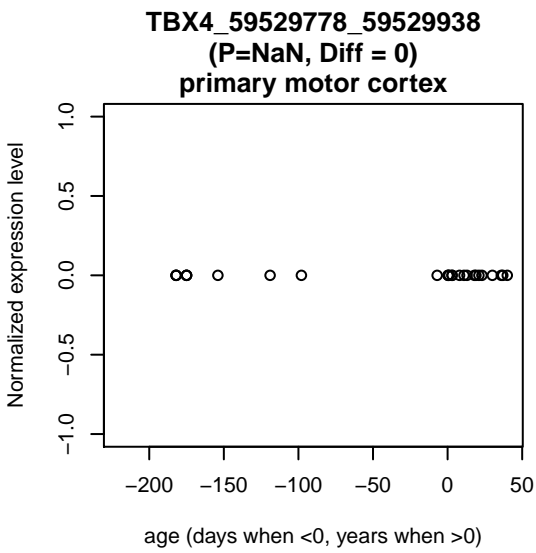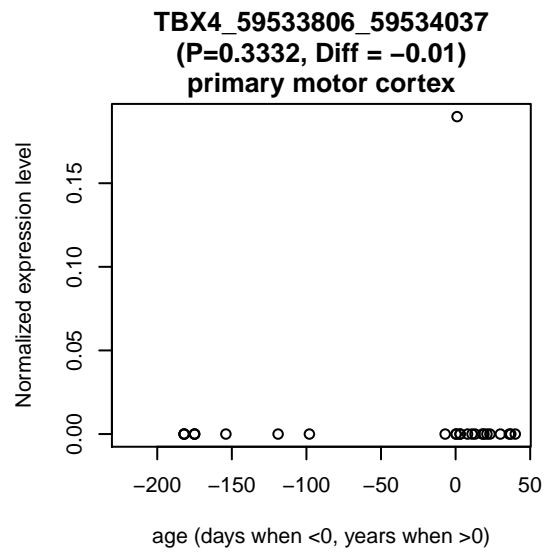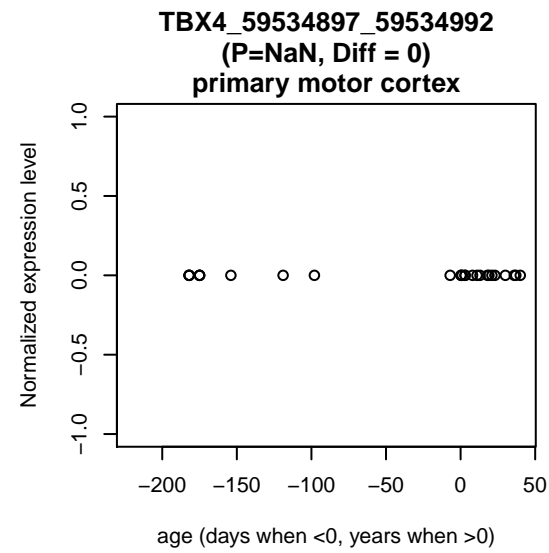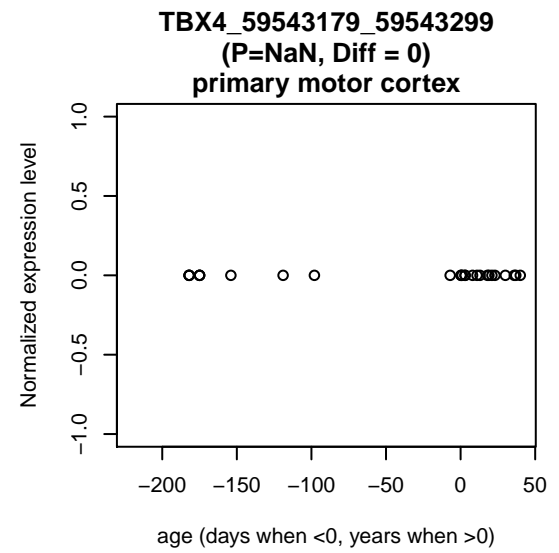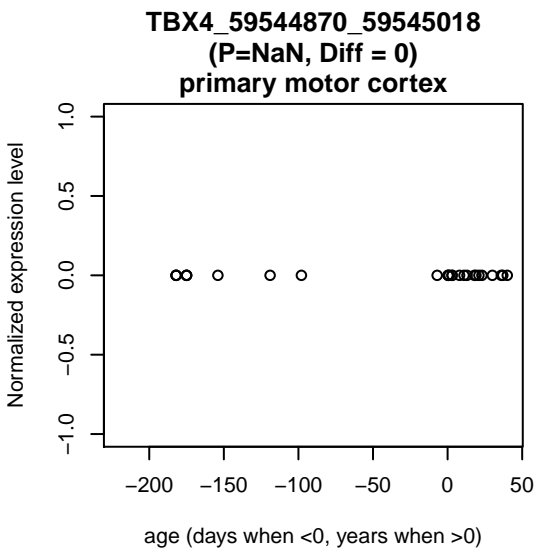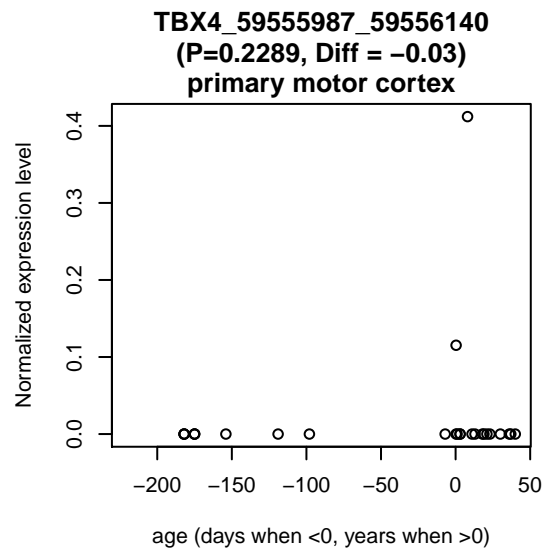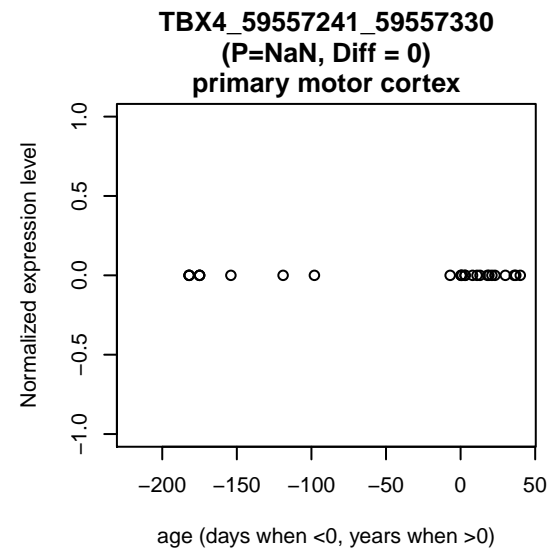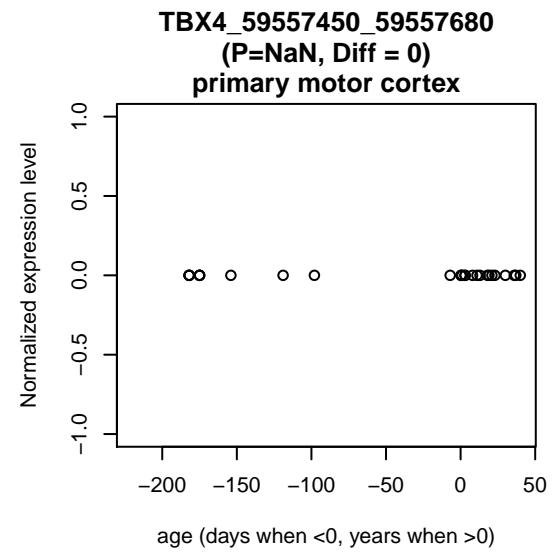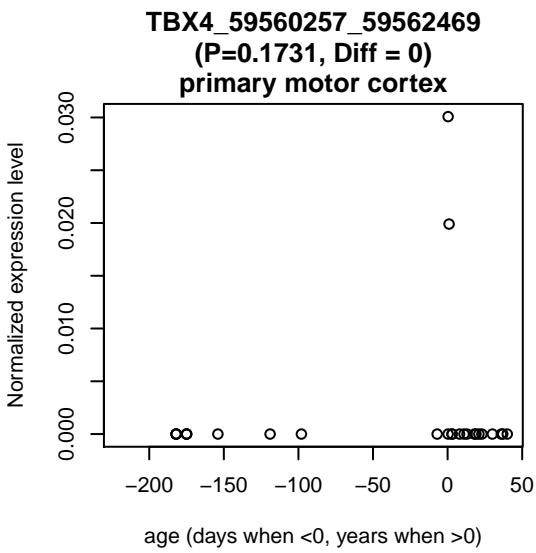

**FRG1\_190861942\_190862226**  
(P=0.0011, Diff = 7)  
primary motor cortex

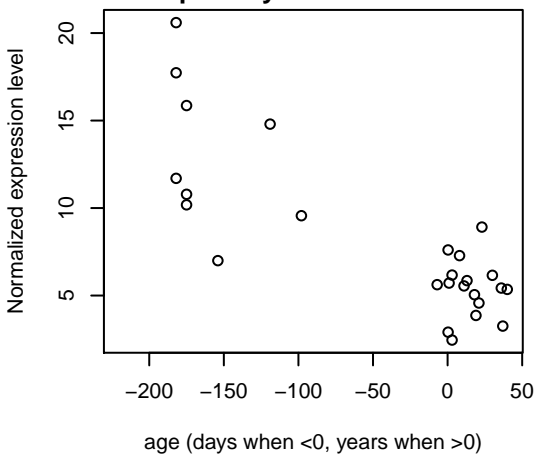

**FRG1\_190862987\_190863159**  
(P=0.6064, Diff = -0.02)  
primary motor cortex

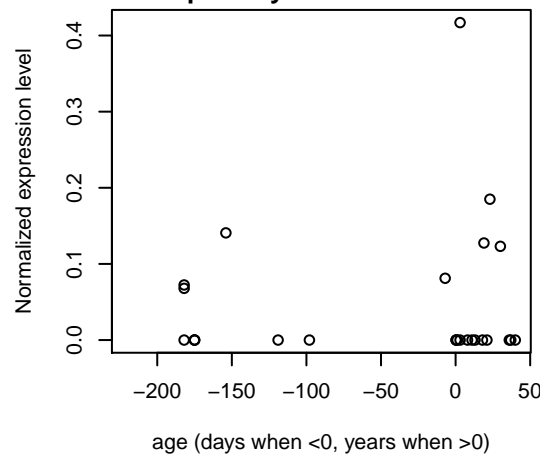

**FRG1\_190864356\_190864427**  
(P=0.0038, Diff = 7.56)  
primary motor cortex

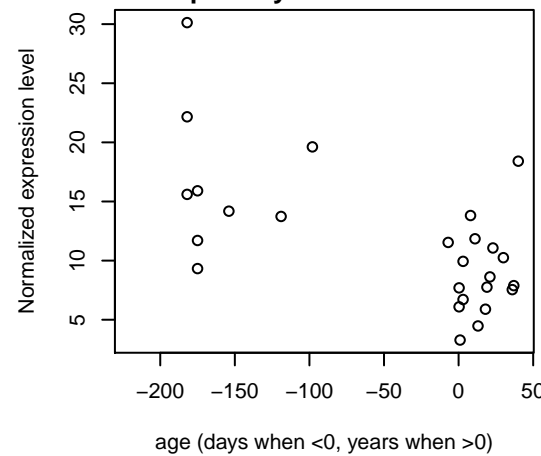

**FRG1\_190873316\_190873442**  
(P=0.0172, Diff = 17.41)  
primary motor cortex

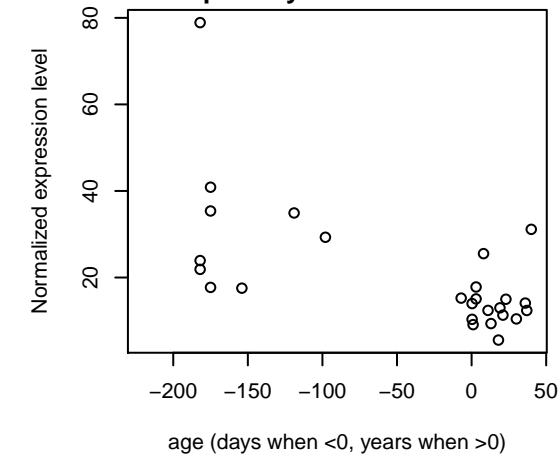

**FRG1\_190874222\_190874280**  
(P=9e-04, Diff = 10.02)  
primary motor cortex

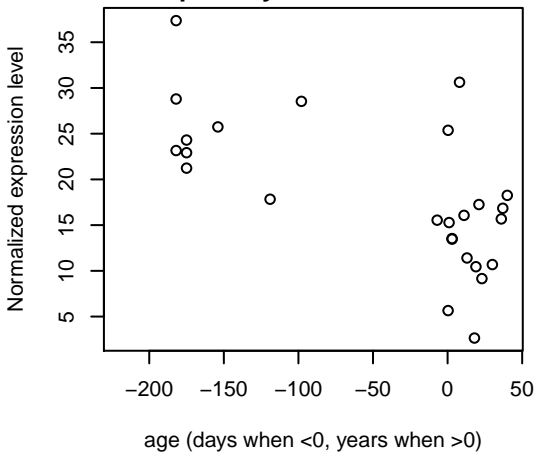

**FRG1\_190876191\_190876306**  
(P=0.0259, Diff = 10.94)  
primary motor cortex

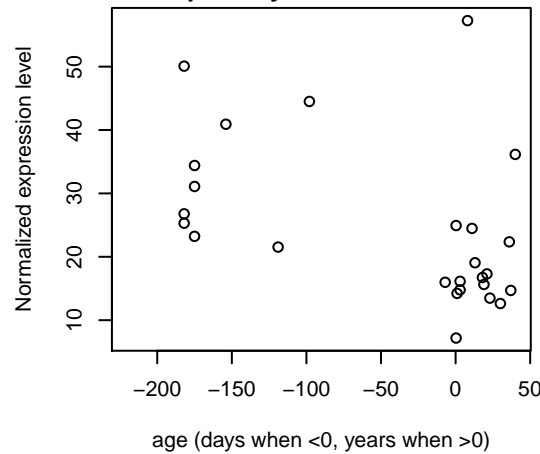

**FRG1\_190878552\_190878657**  
(P=0.1844, Diff = 2.46)  
primary motor cortex

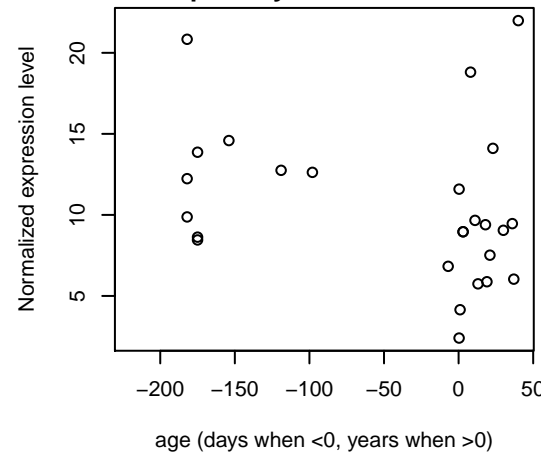

**FRG1\_190881902\_190881994**  
(P=0.0954, Diff = 2.91)  
primary motor cortex

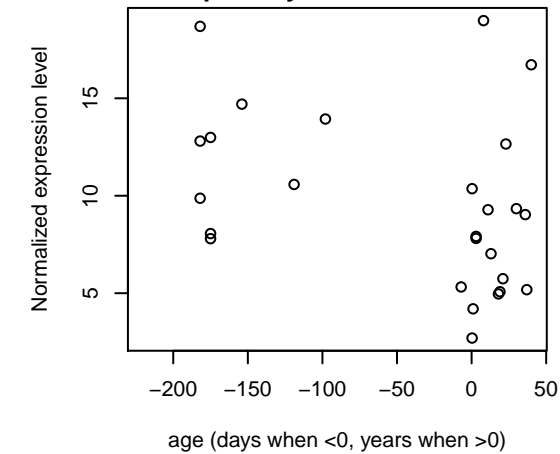

**FRG1\_190882016\_190882355**  
(P=0.5586, Diff = 0.08)  
primary motor cortex

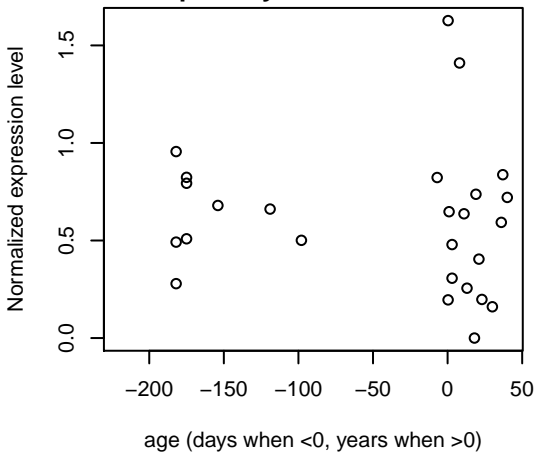

**FRG1\_190882583\_190882705**  
(P=0.771, Diff = -0.02)  
primary motor cortex

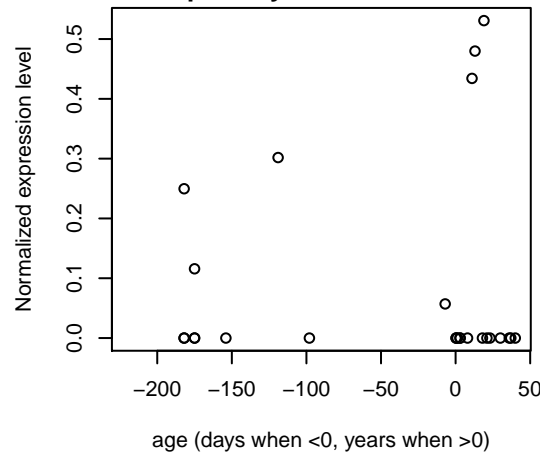

**FRG1\_190882976\_190883087**  
(P=0.2607, Diff = 8.12)  
primary motor cortex

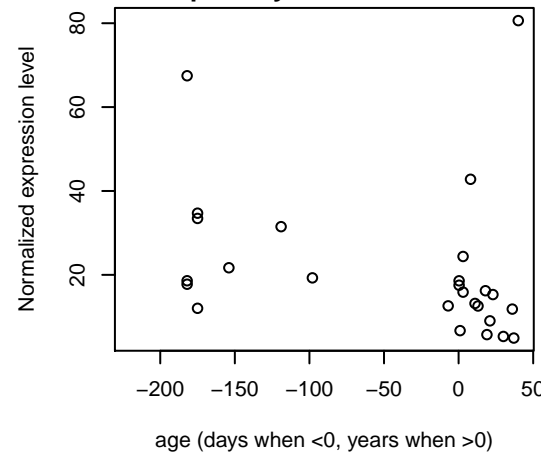

**FRG1\_190884247\_190884359**  
(P=0.3536, Diff = 3.41)  
primary motor cortex

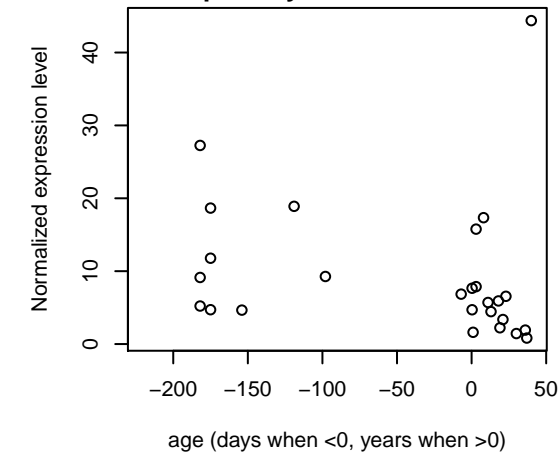

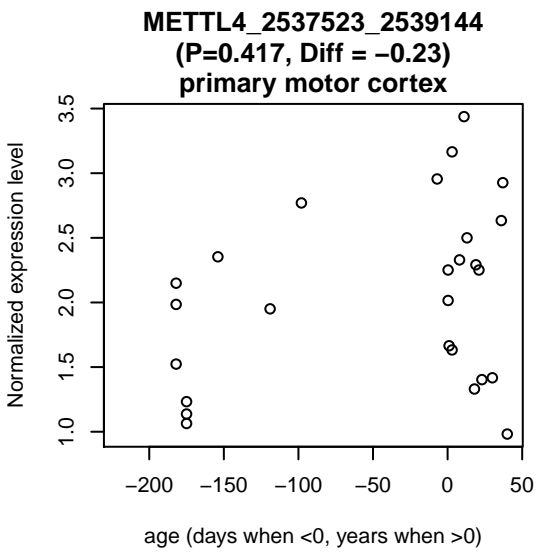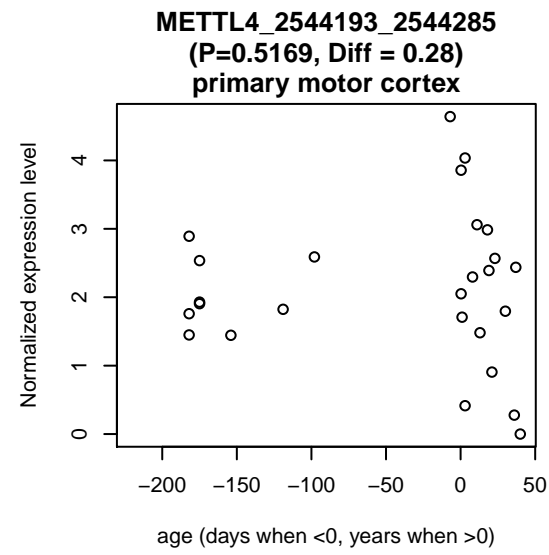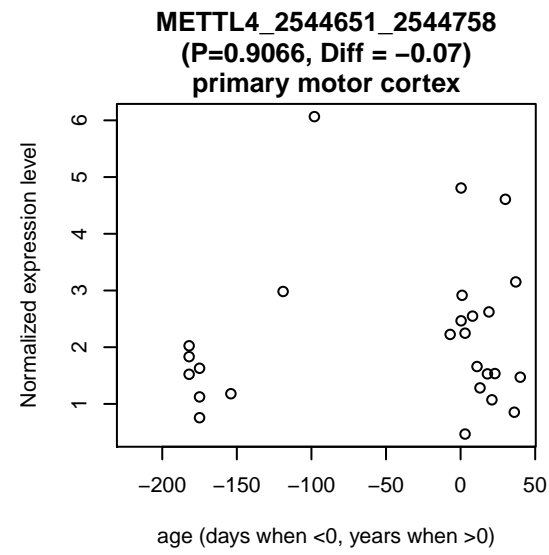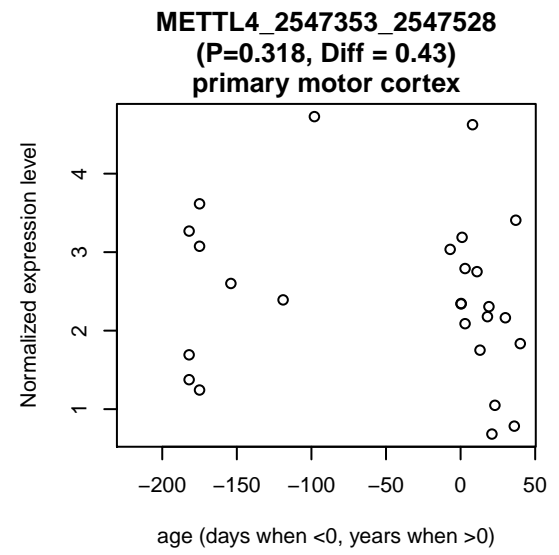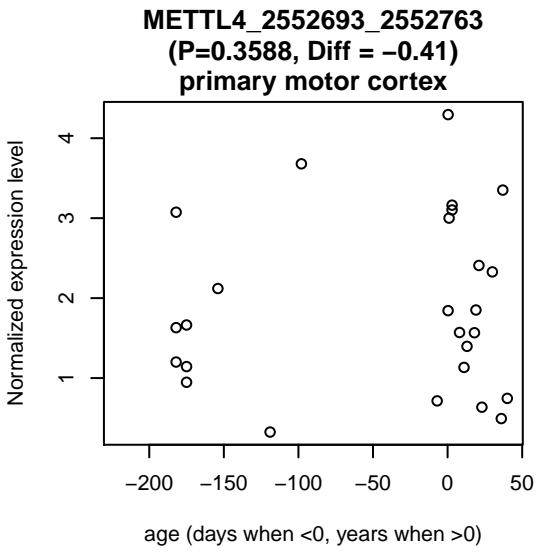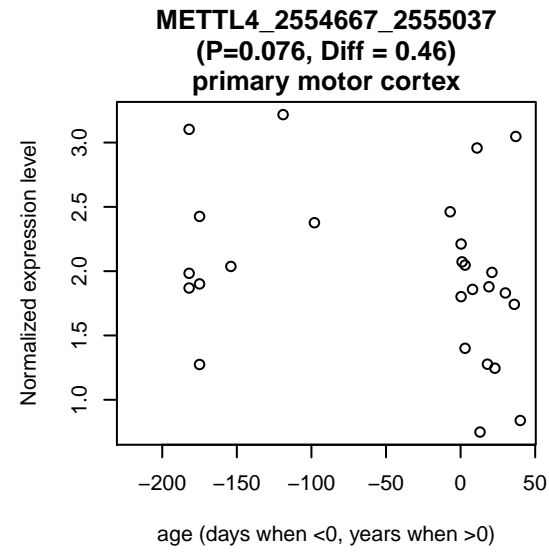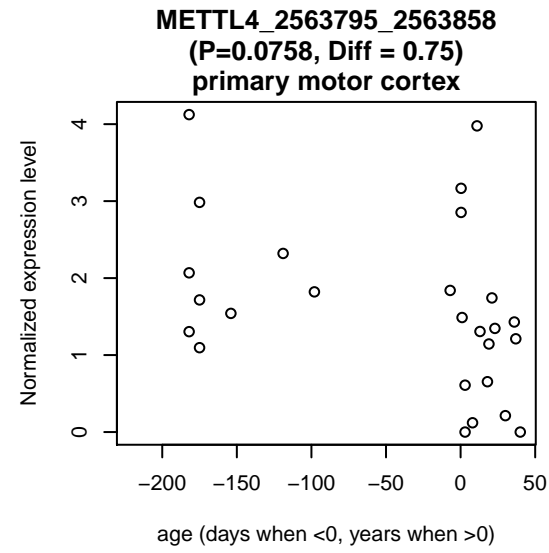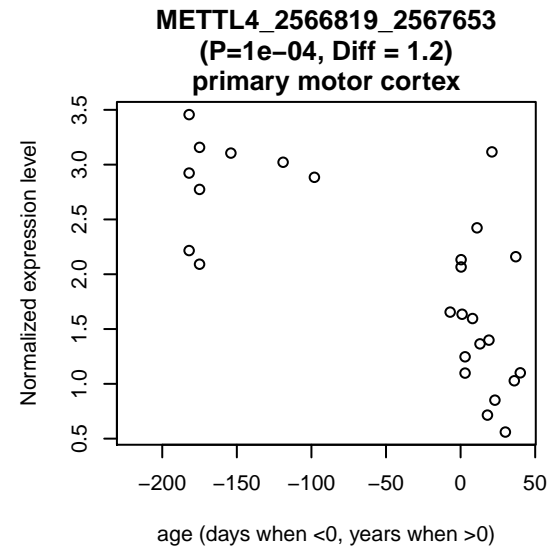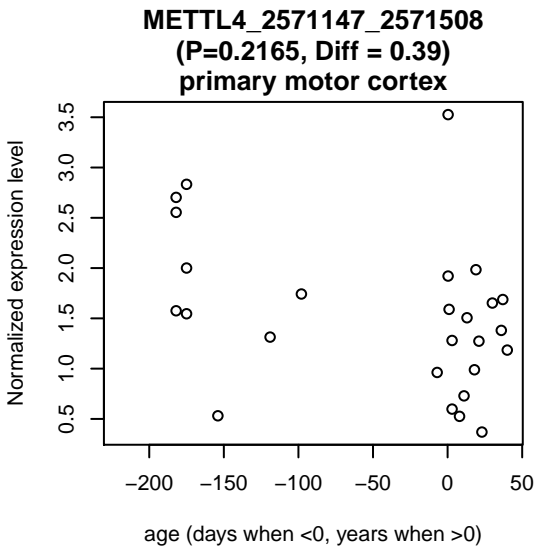

**C7orf11\_40172341\_40172858**  
(P=0.0078, Diff = 5.77)  
primary motor cortex

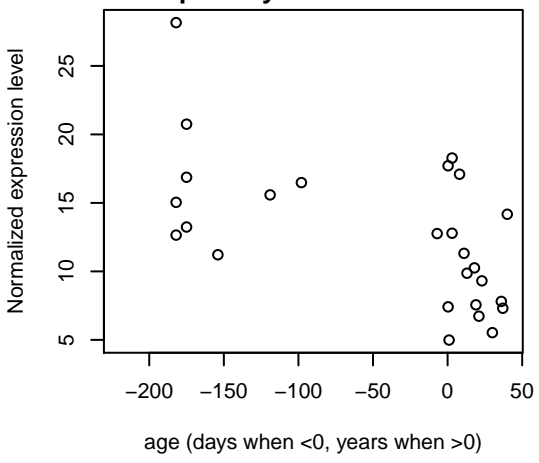

**C7orf11\_40173827\_40174258**  
(P=0.0116, Diff = 5.43)  
primary motor cortex

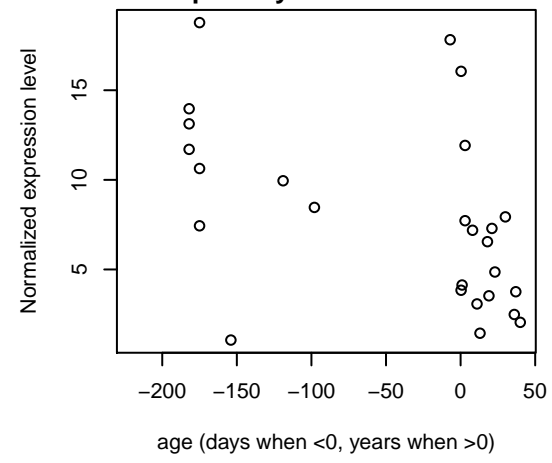



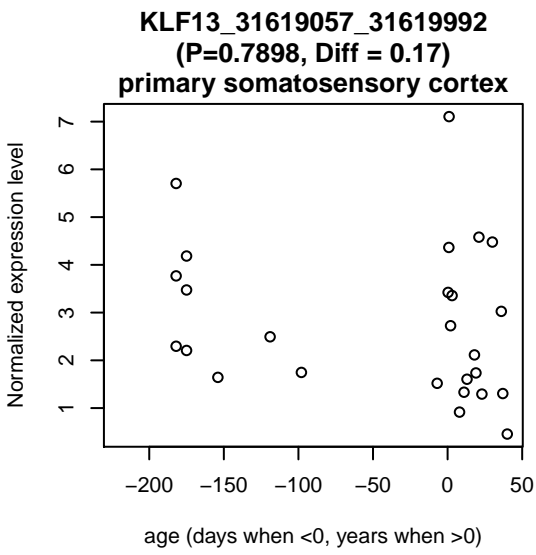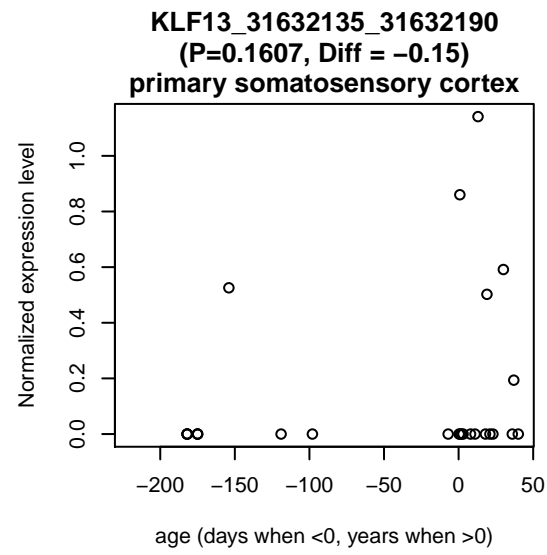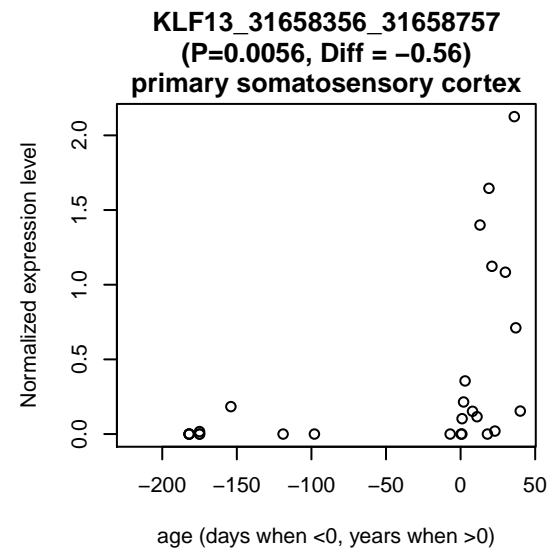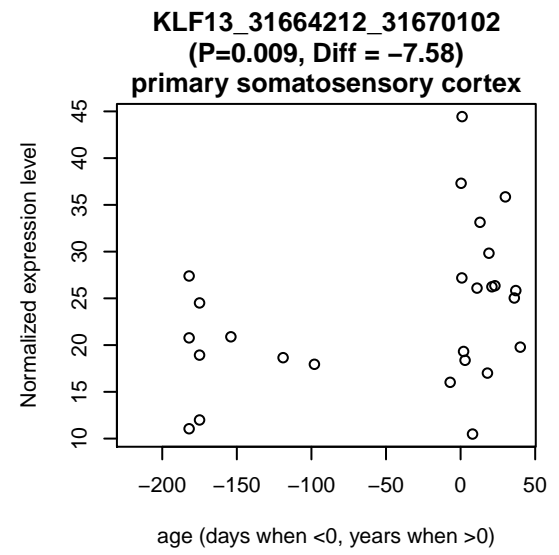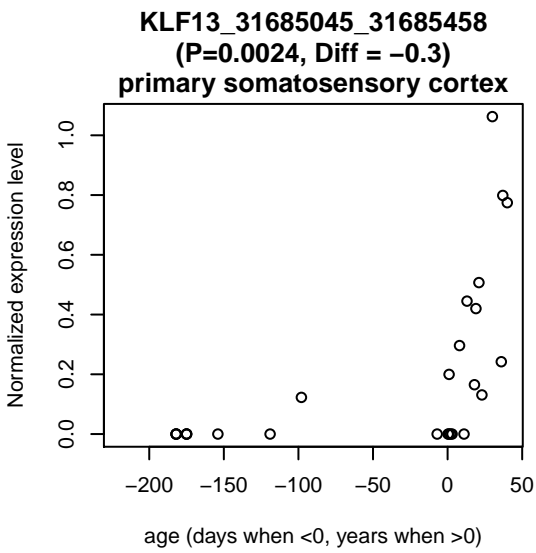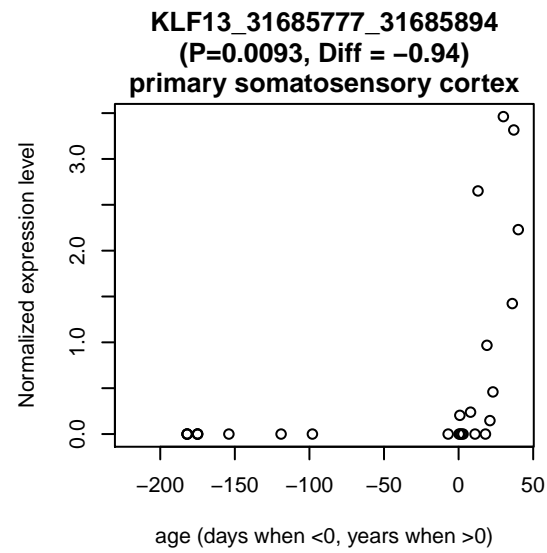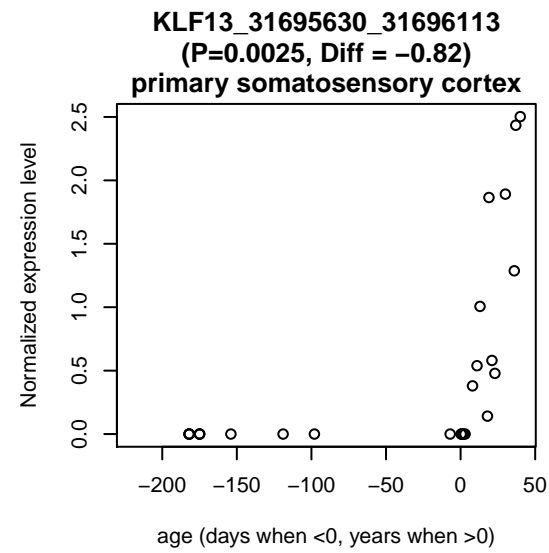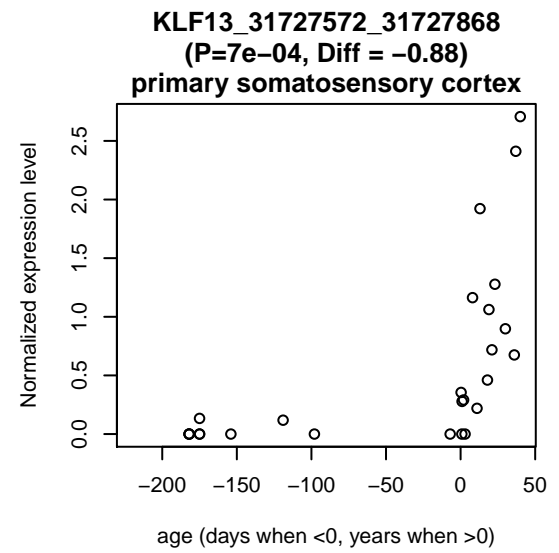

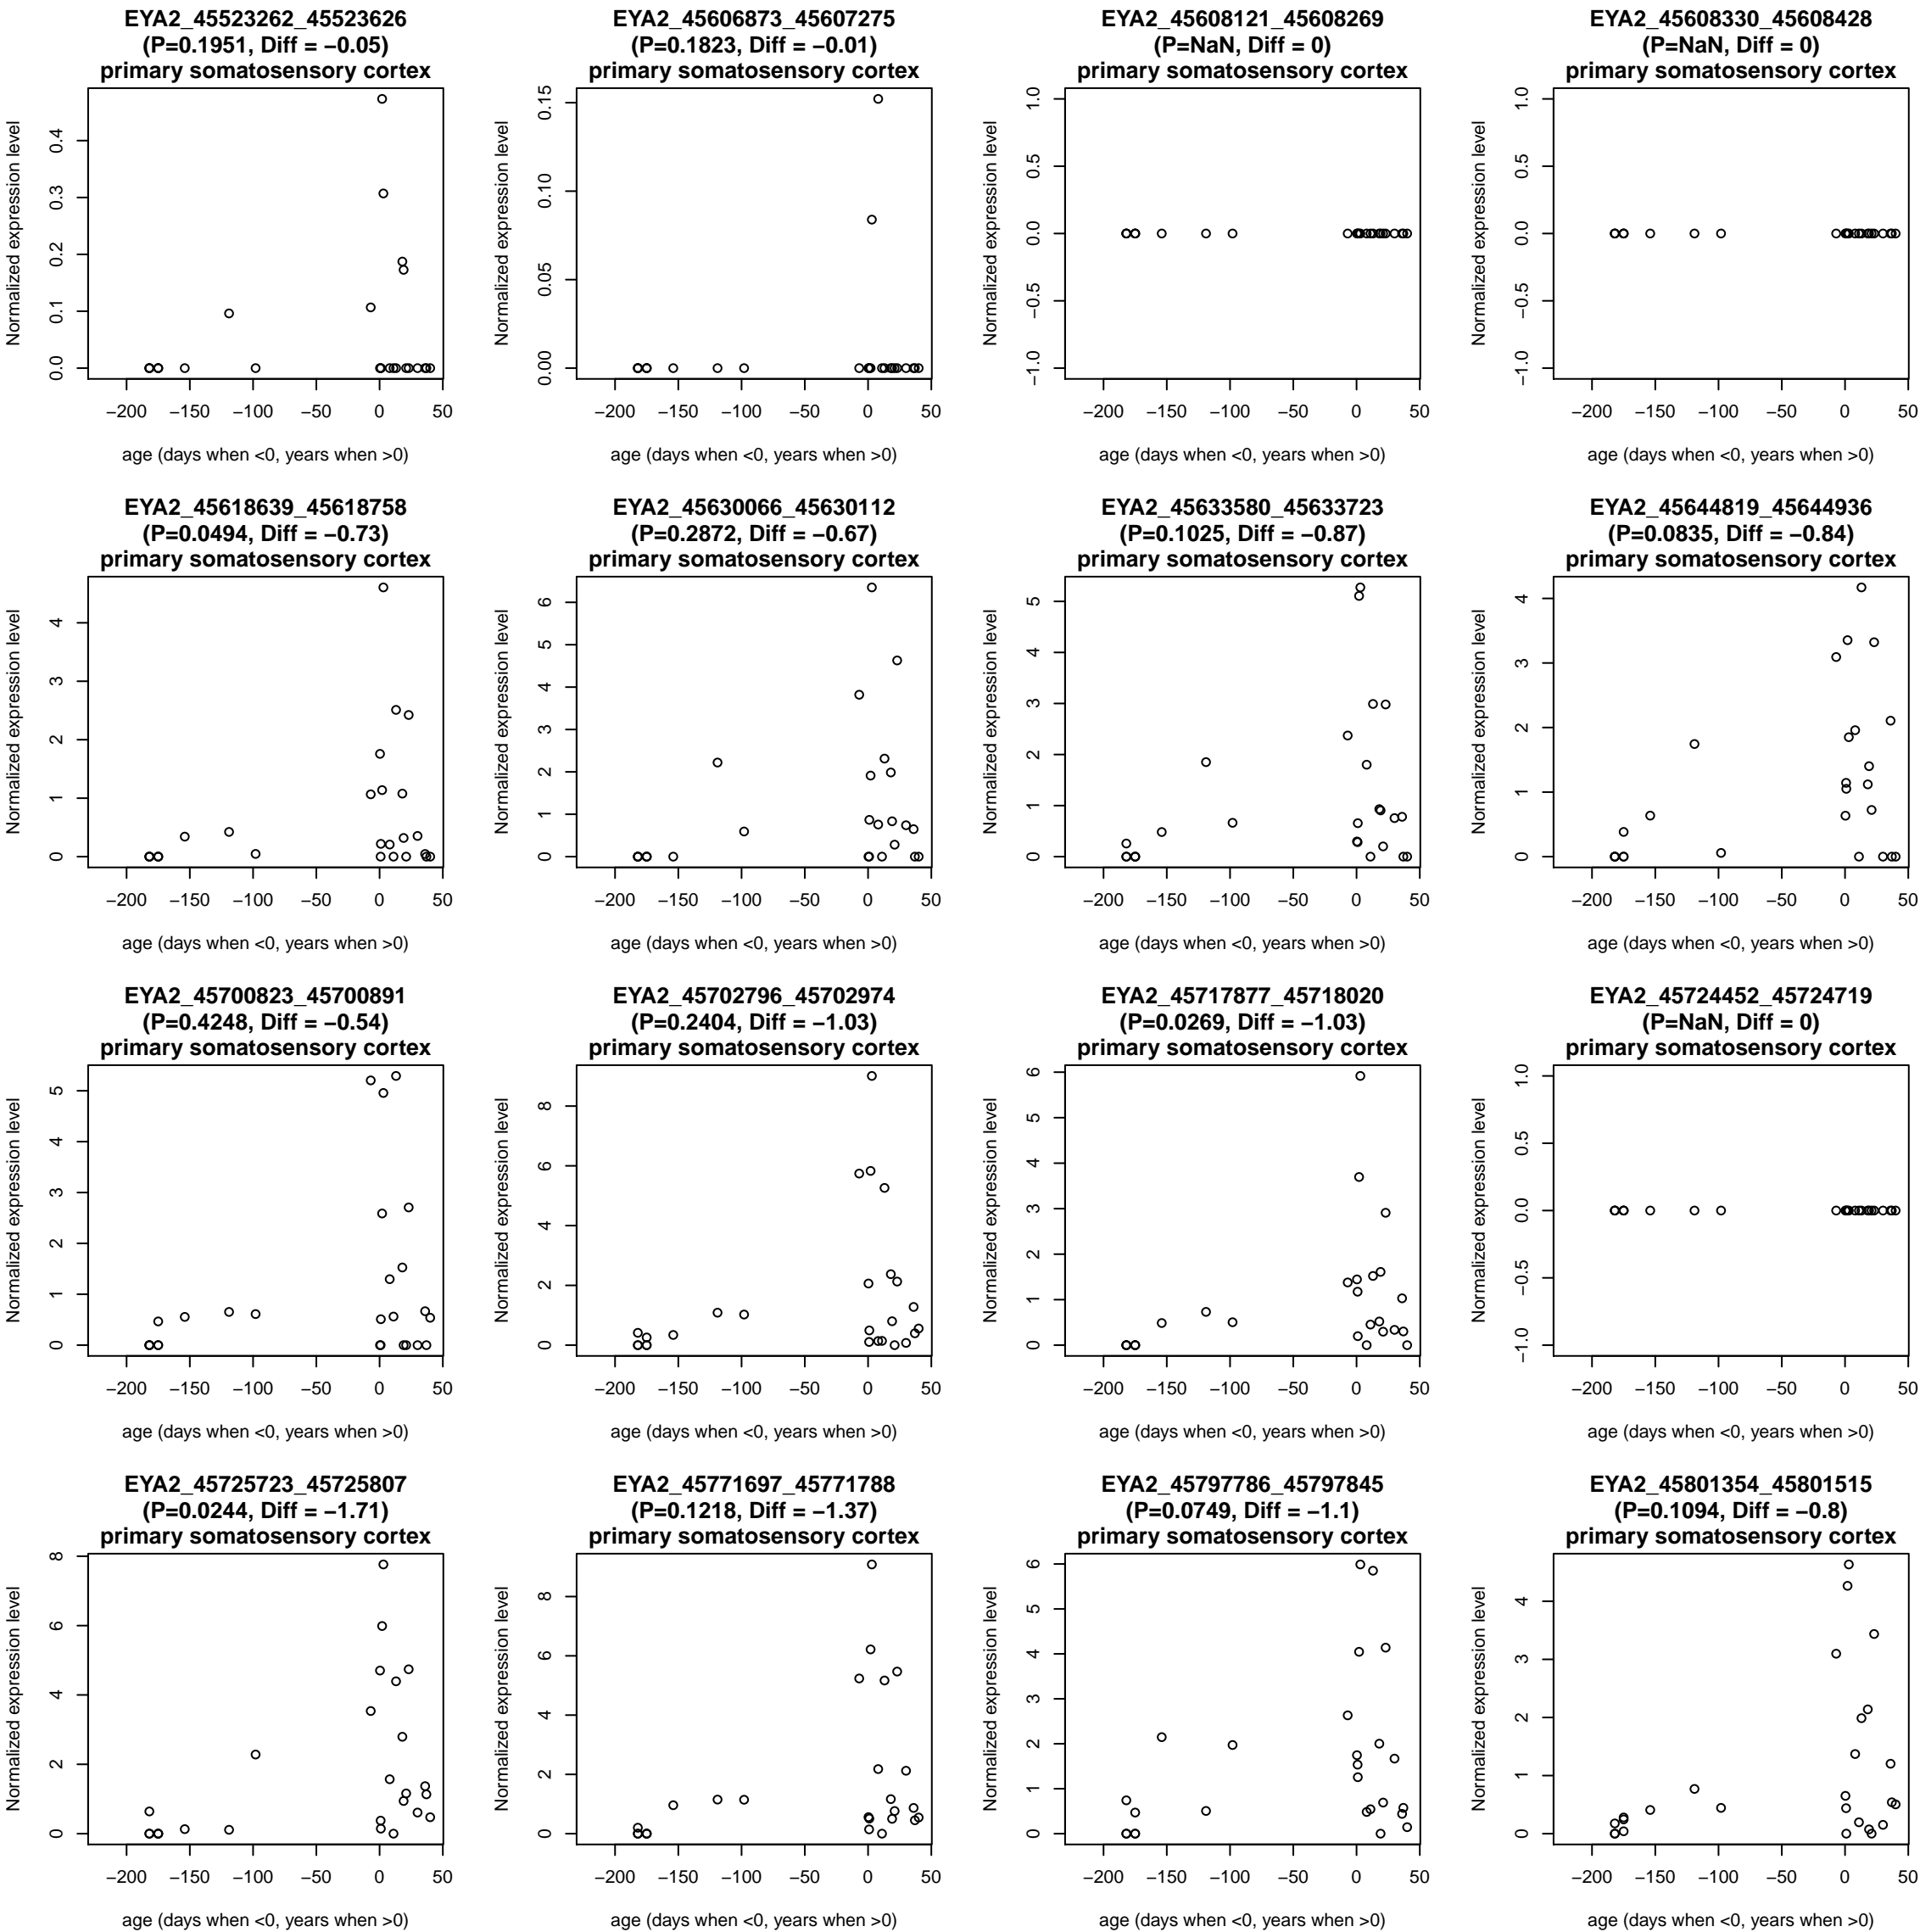

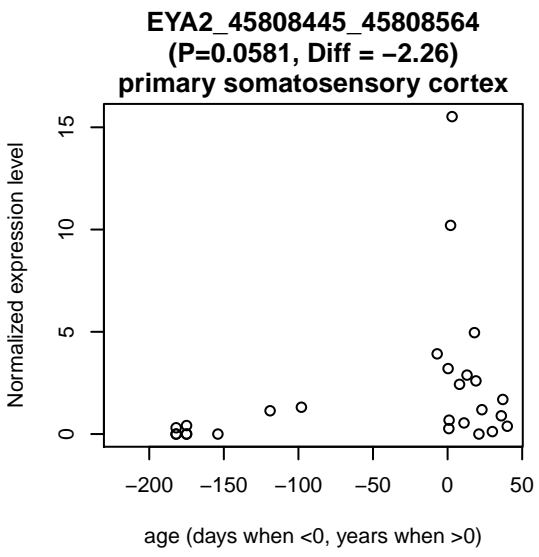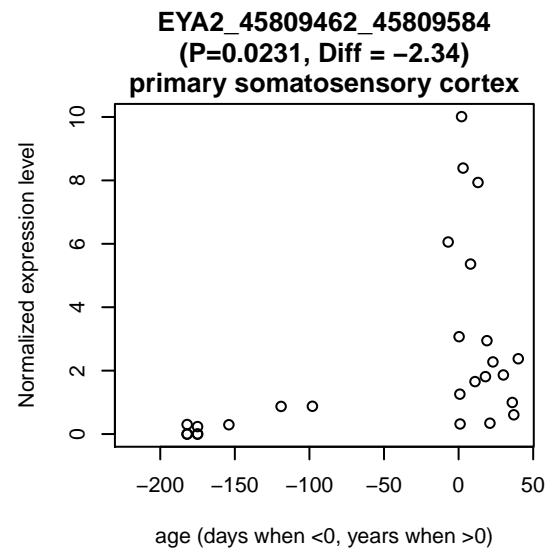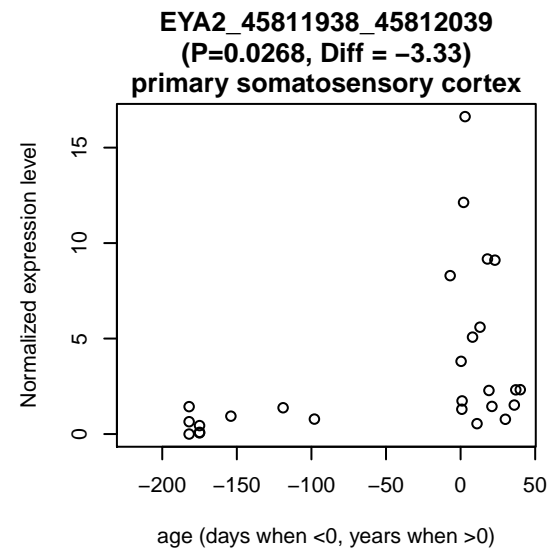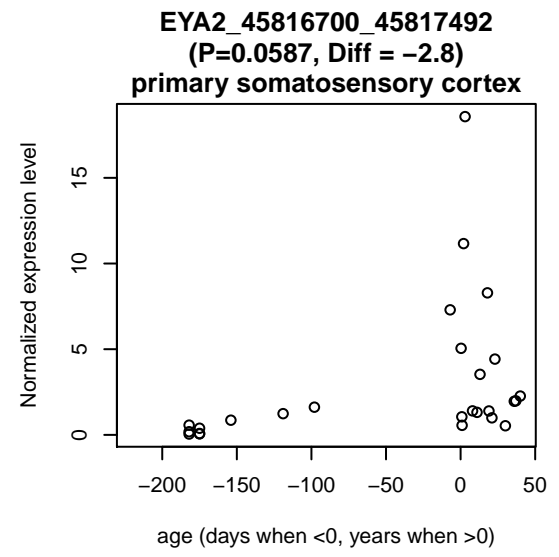

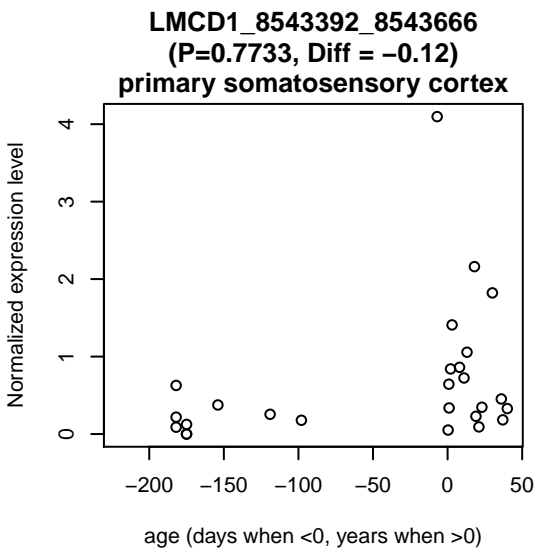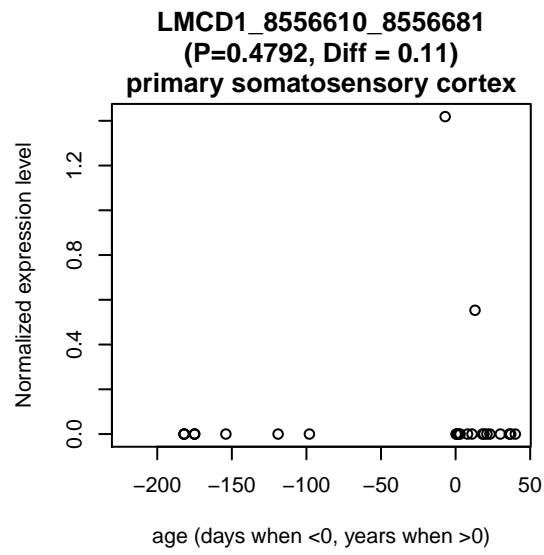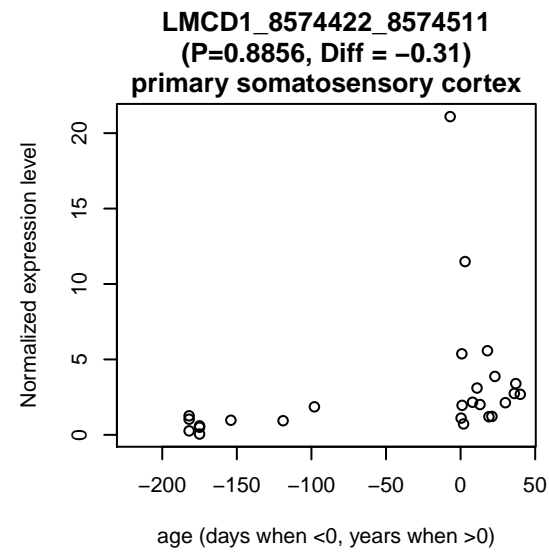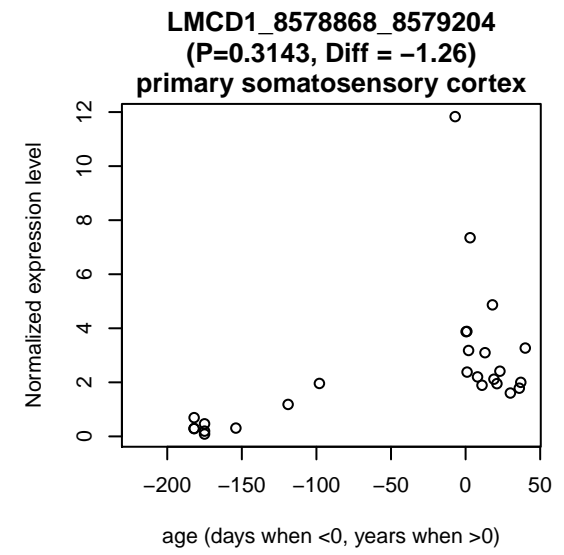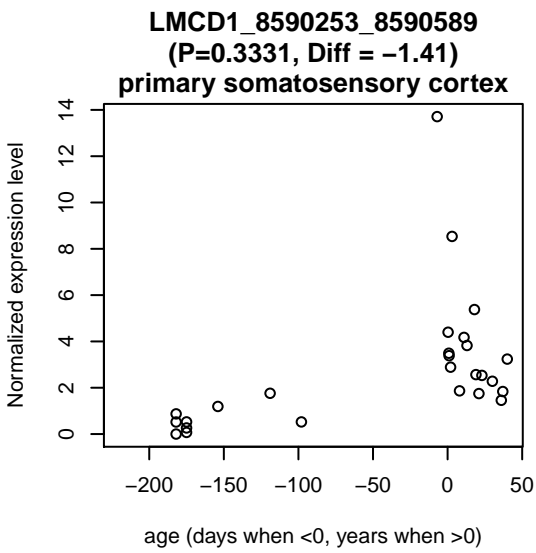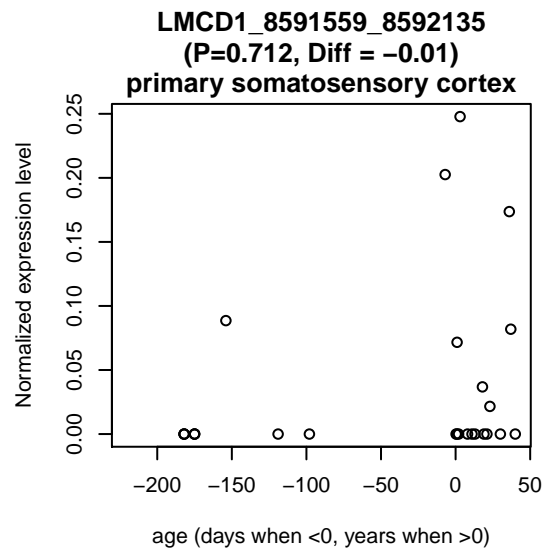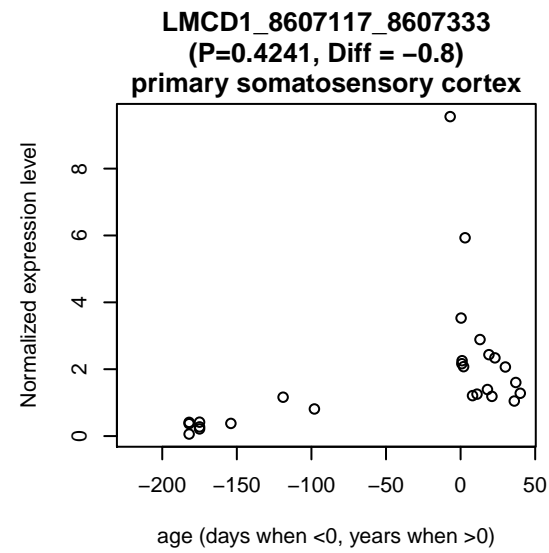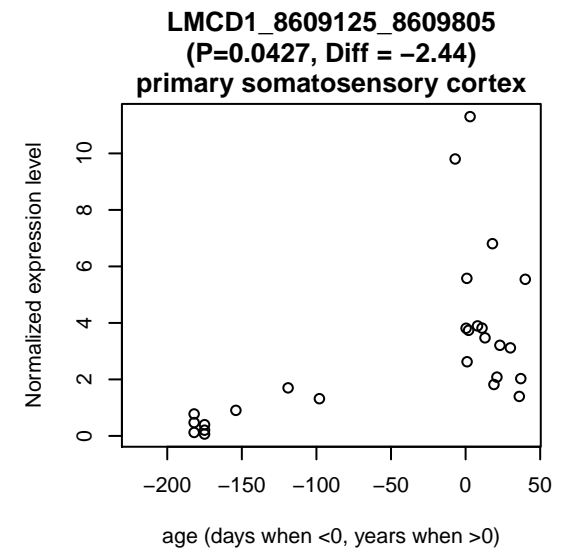

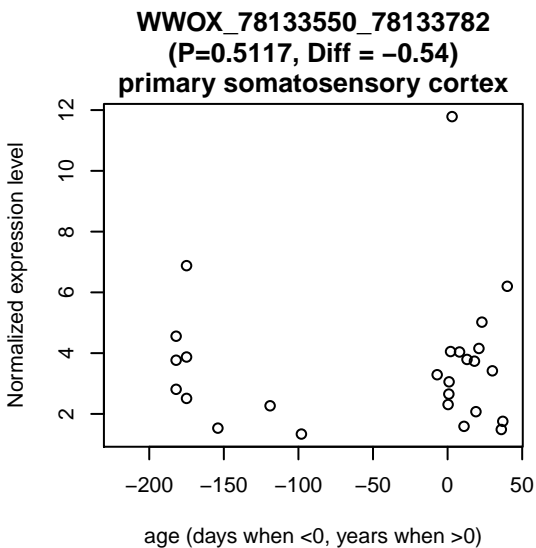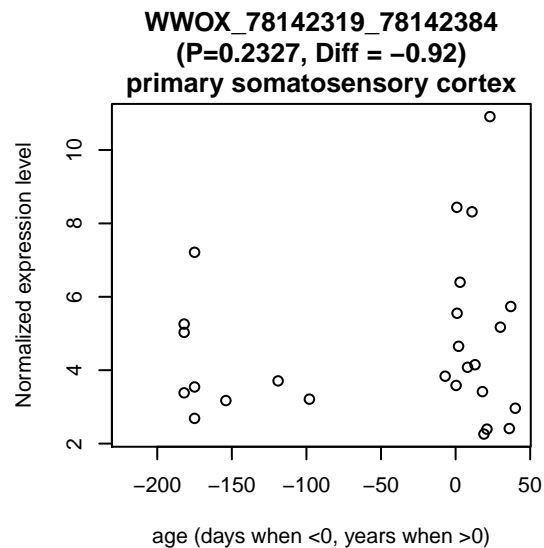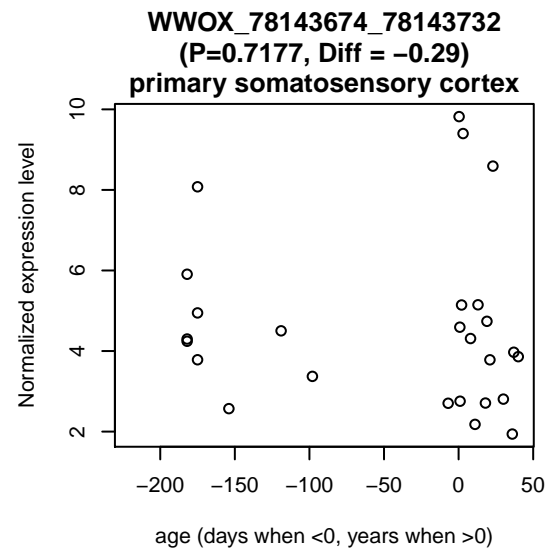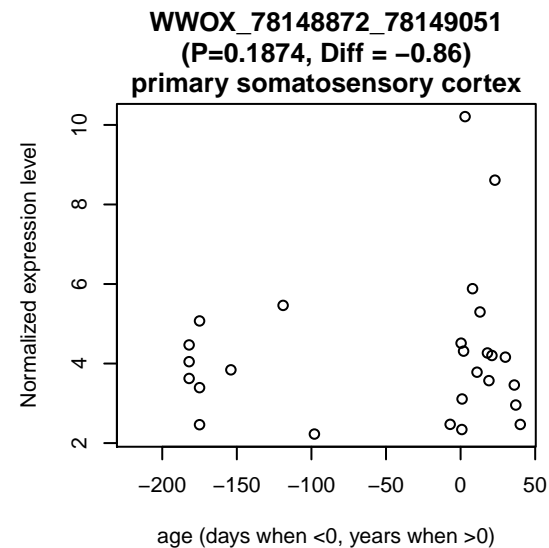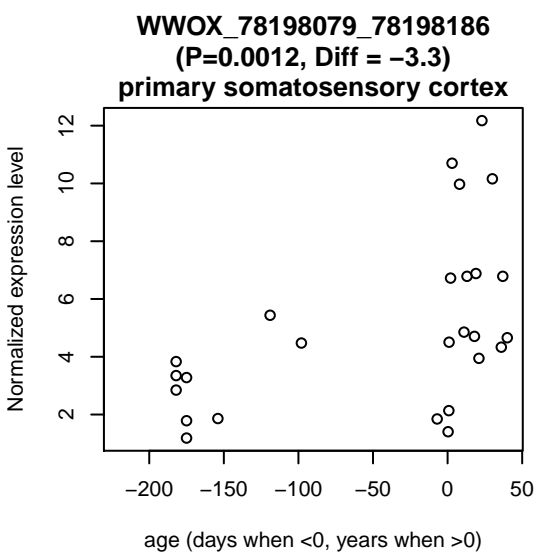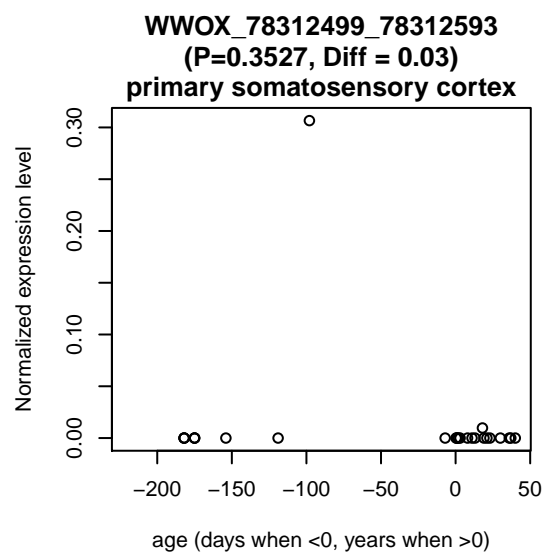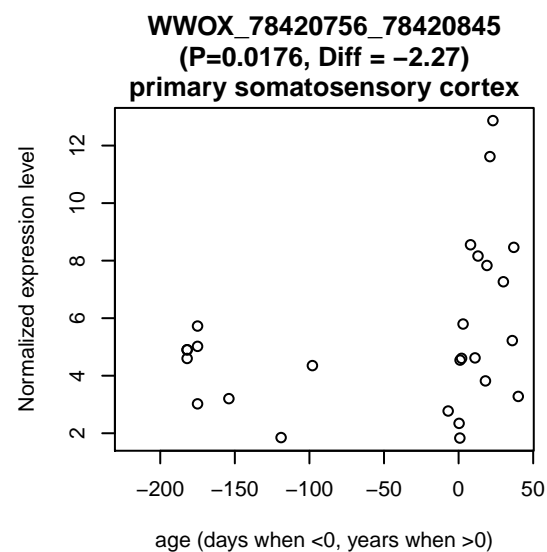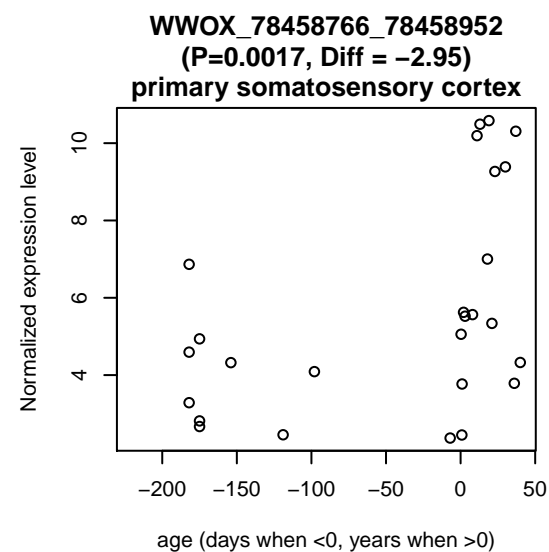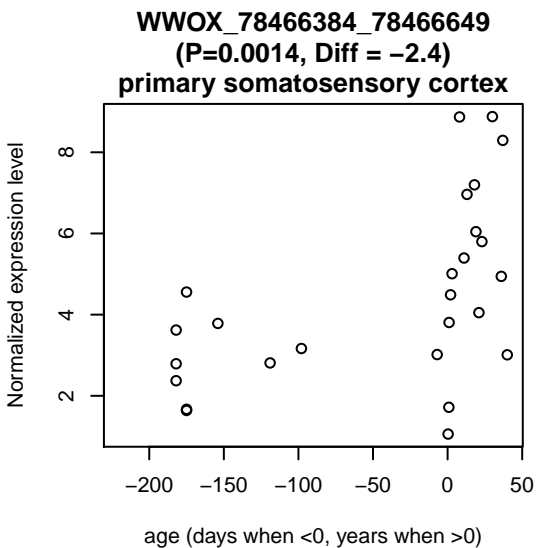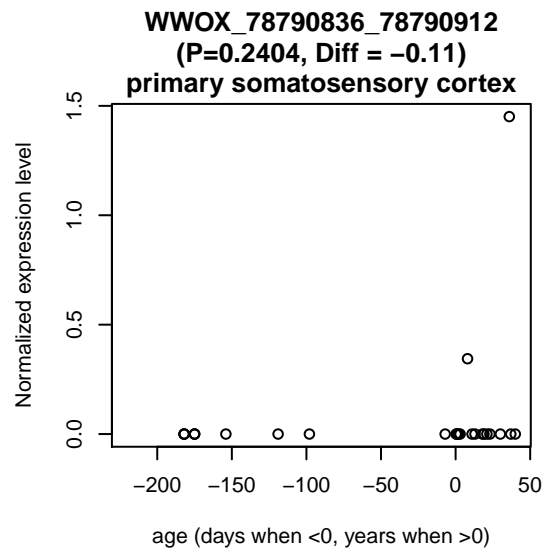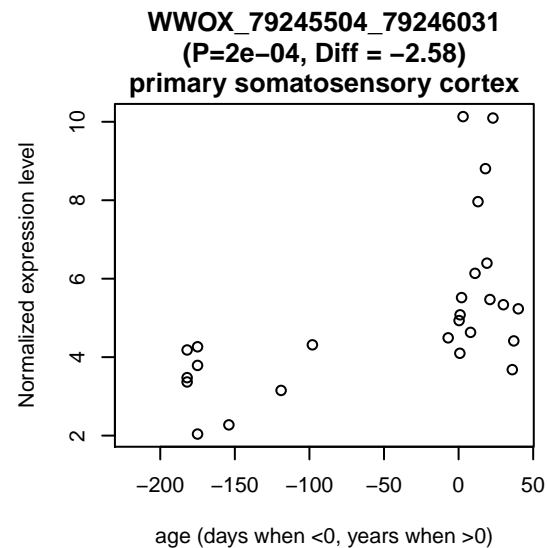

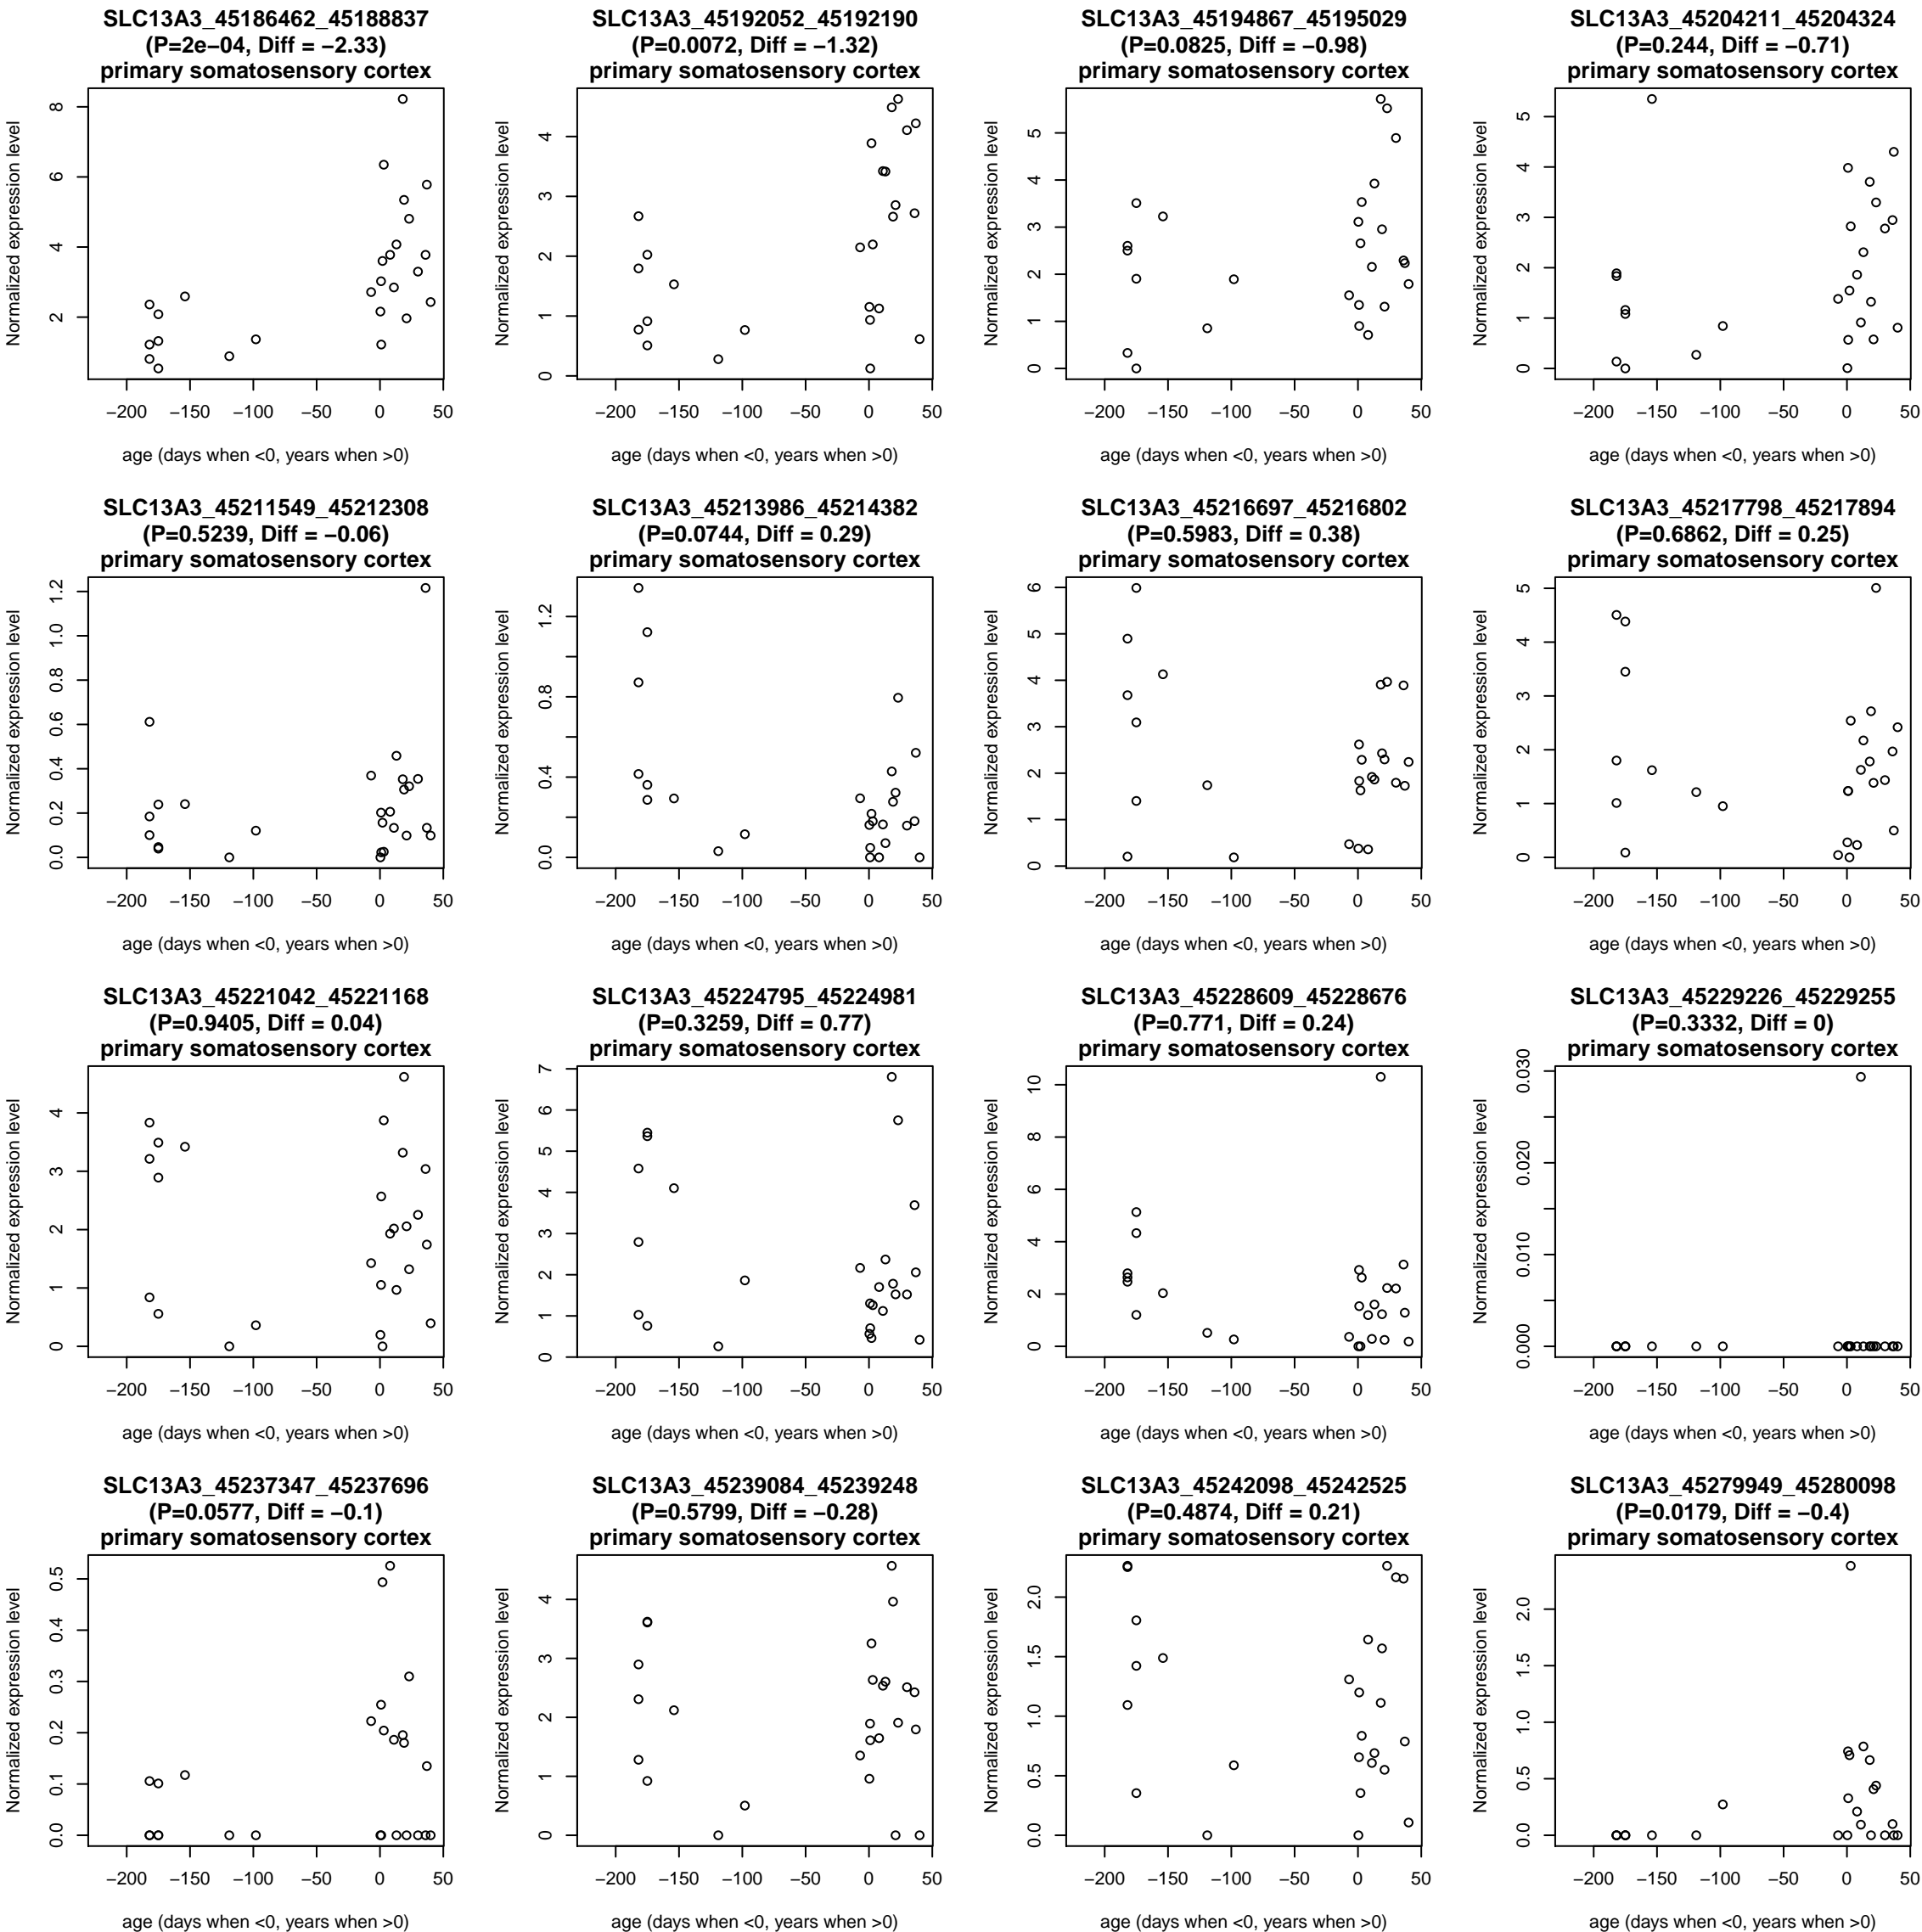

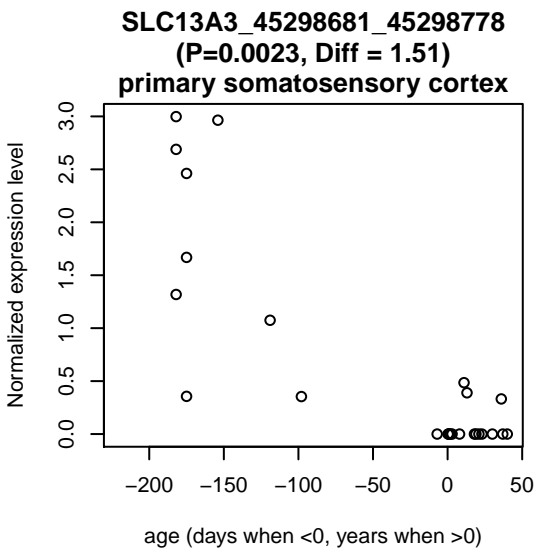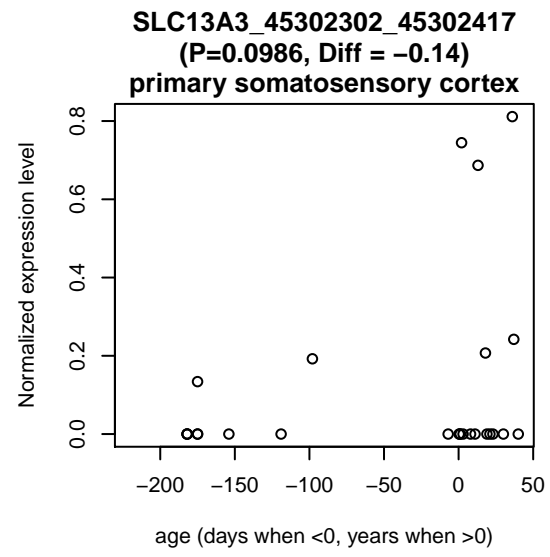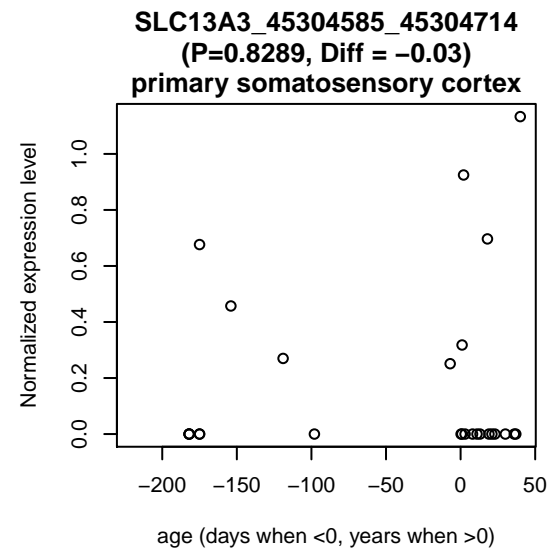

HTR1B\_78171947\_78173490  
(P=0.0061, Diff = -0.77)  
primary somatosensory cortex

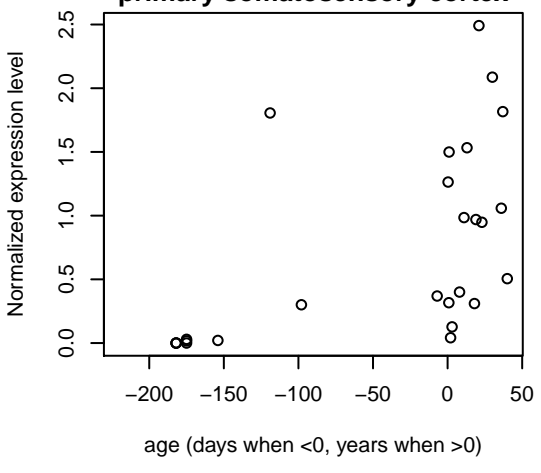



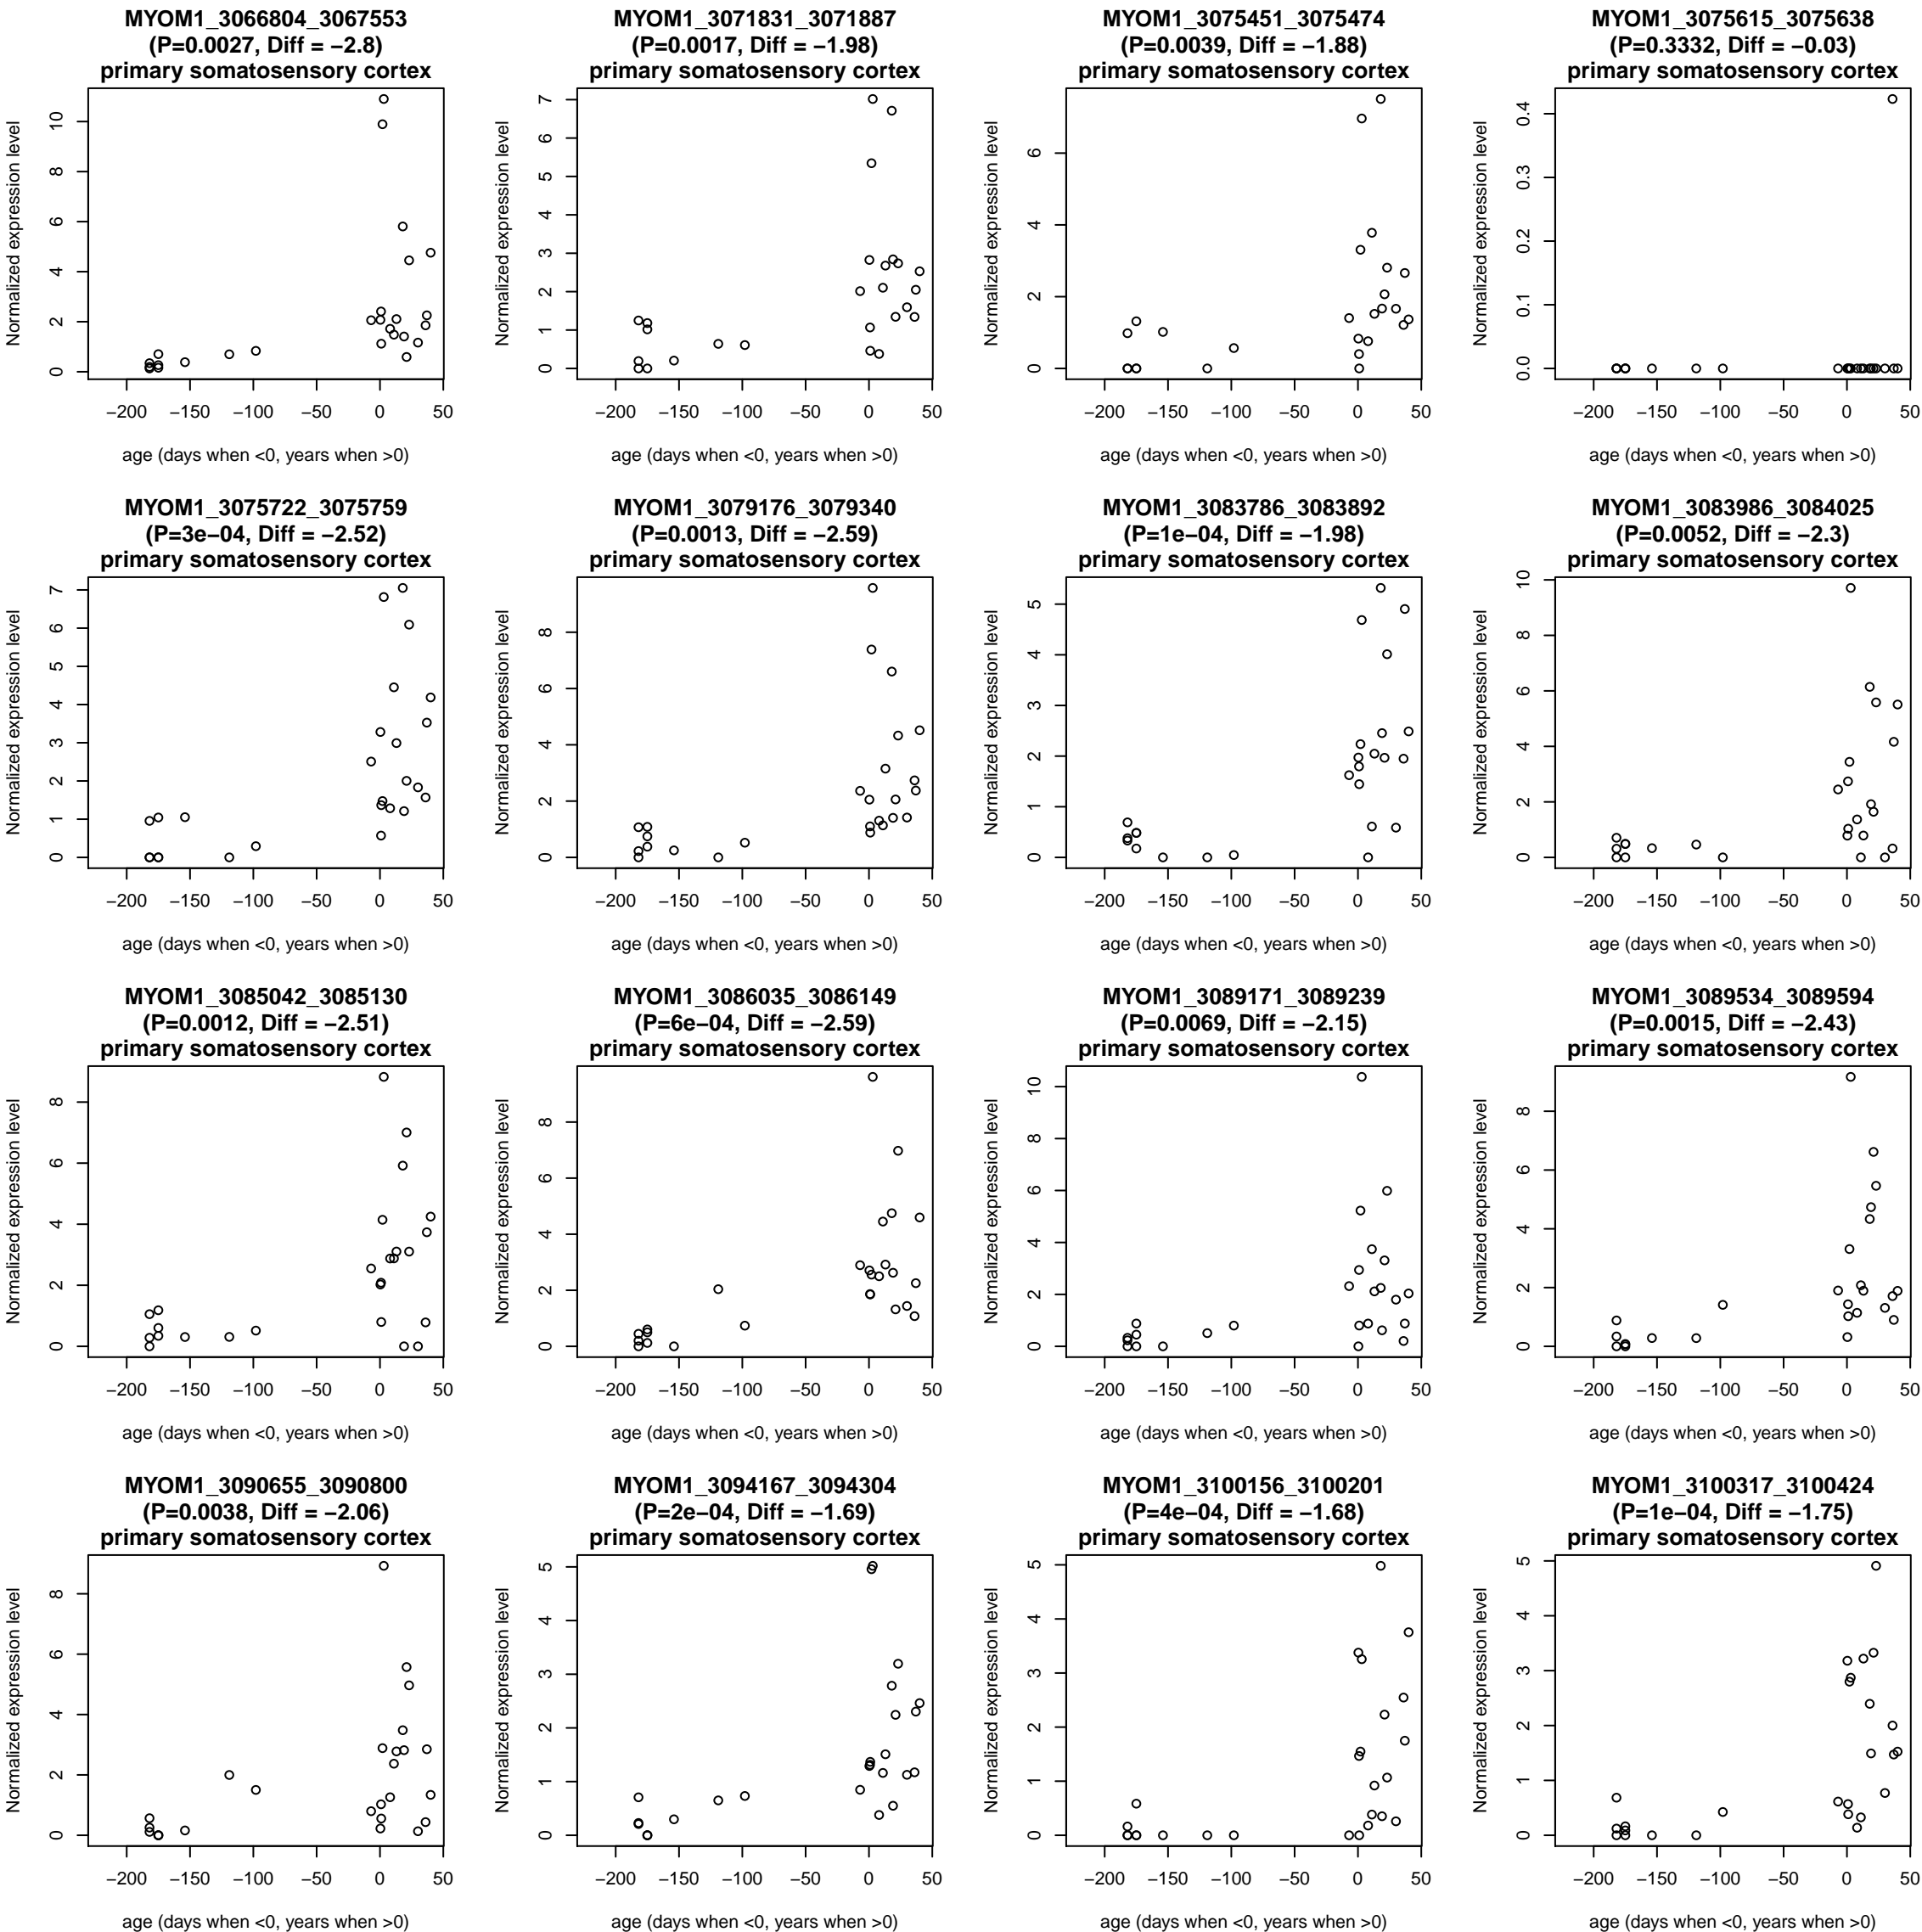

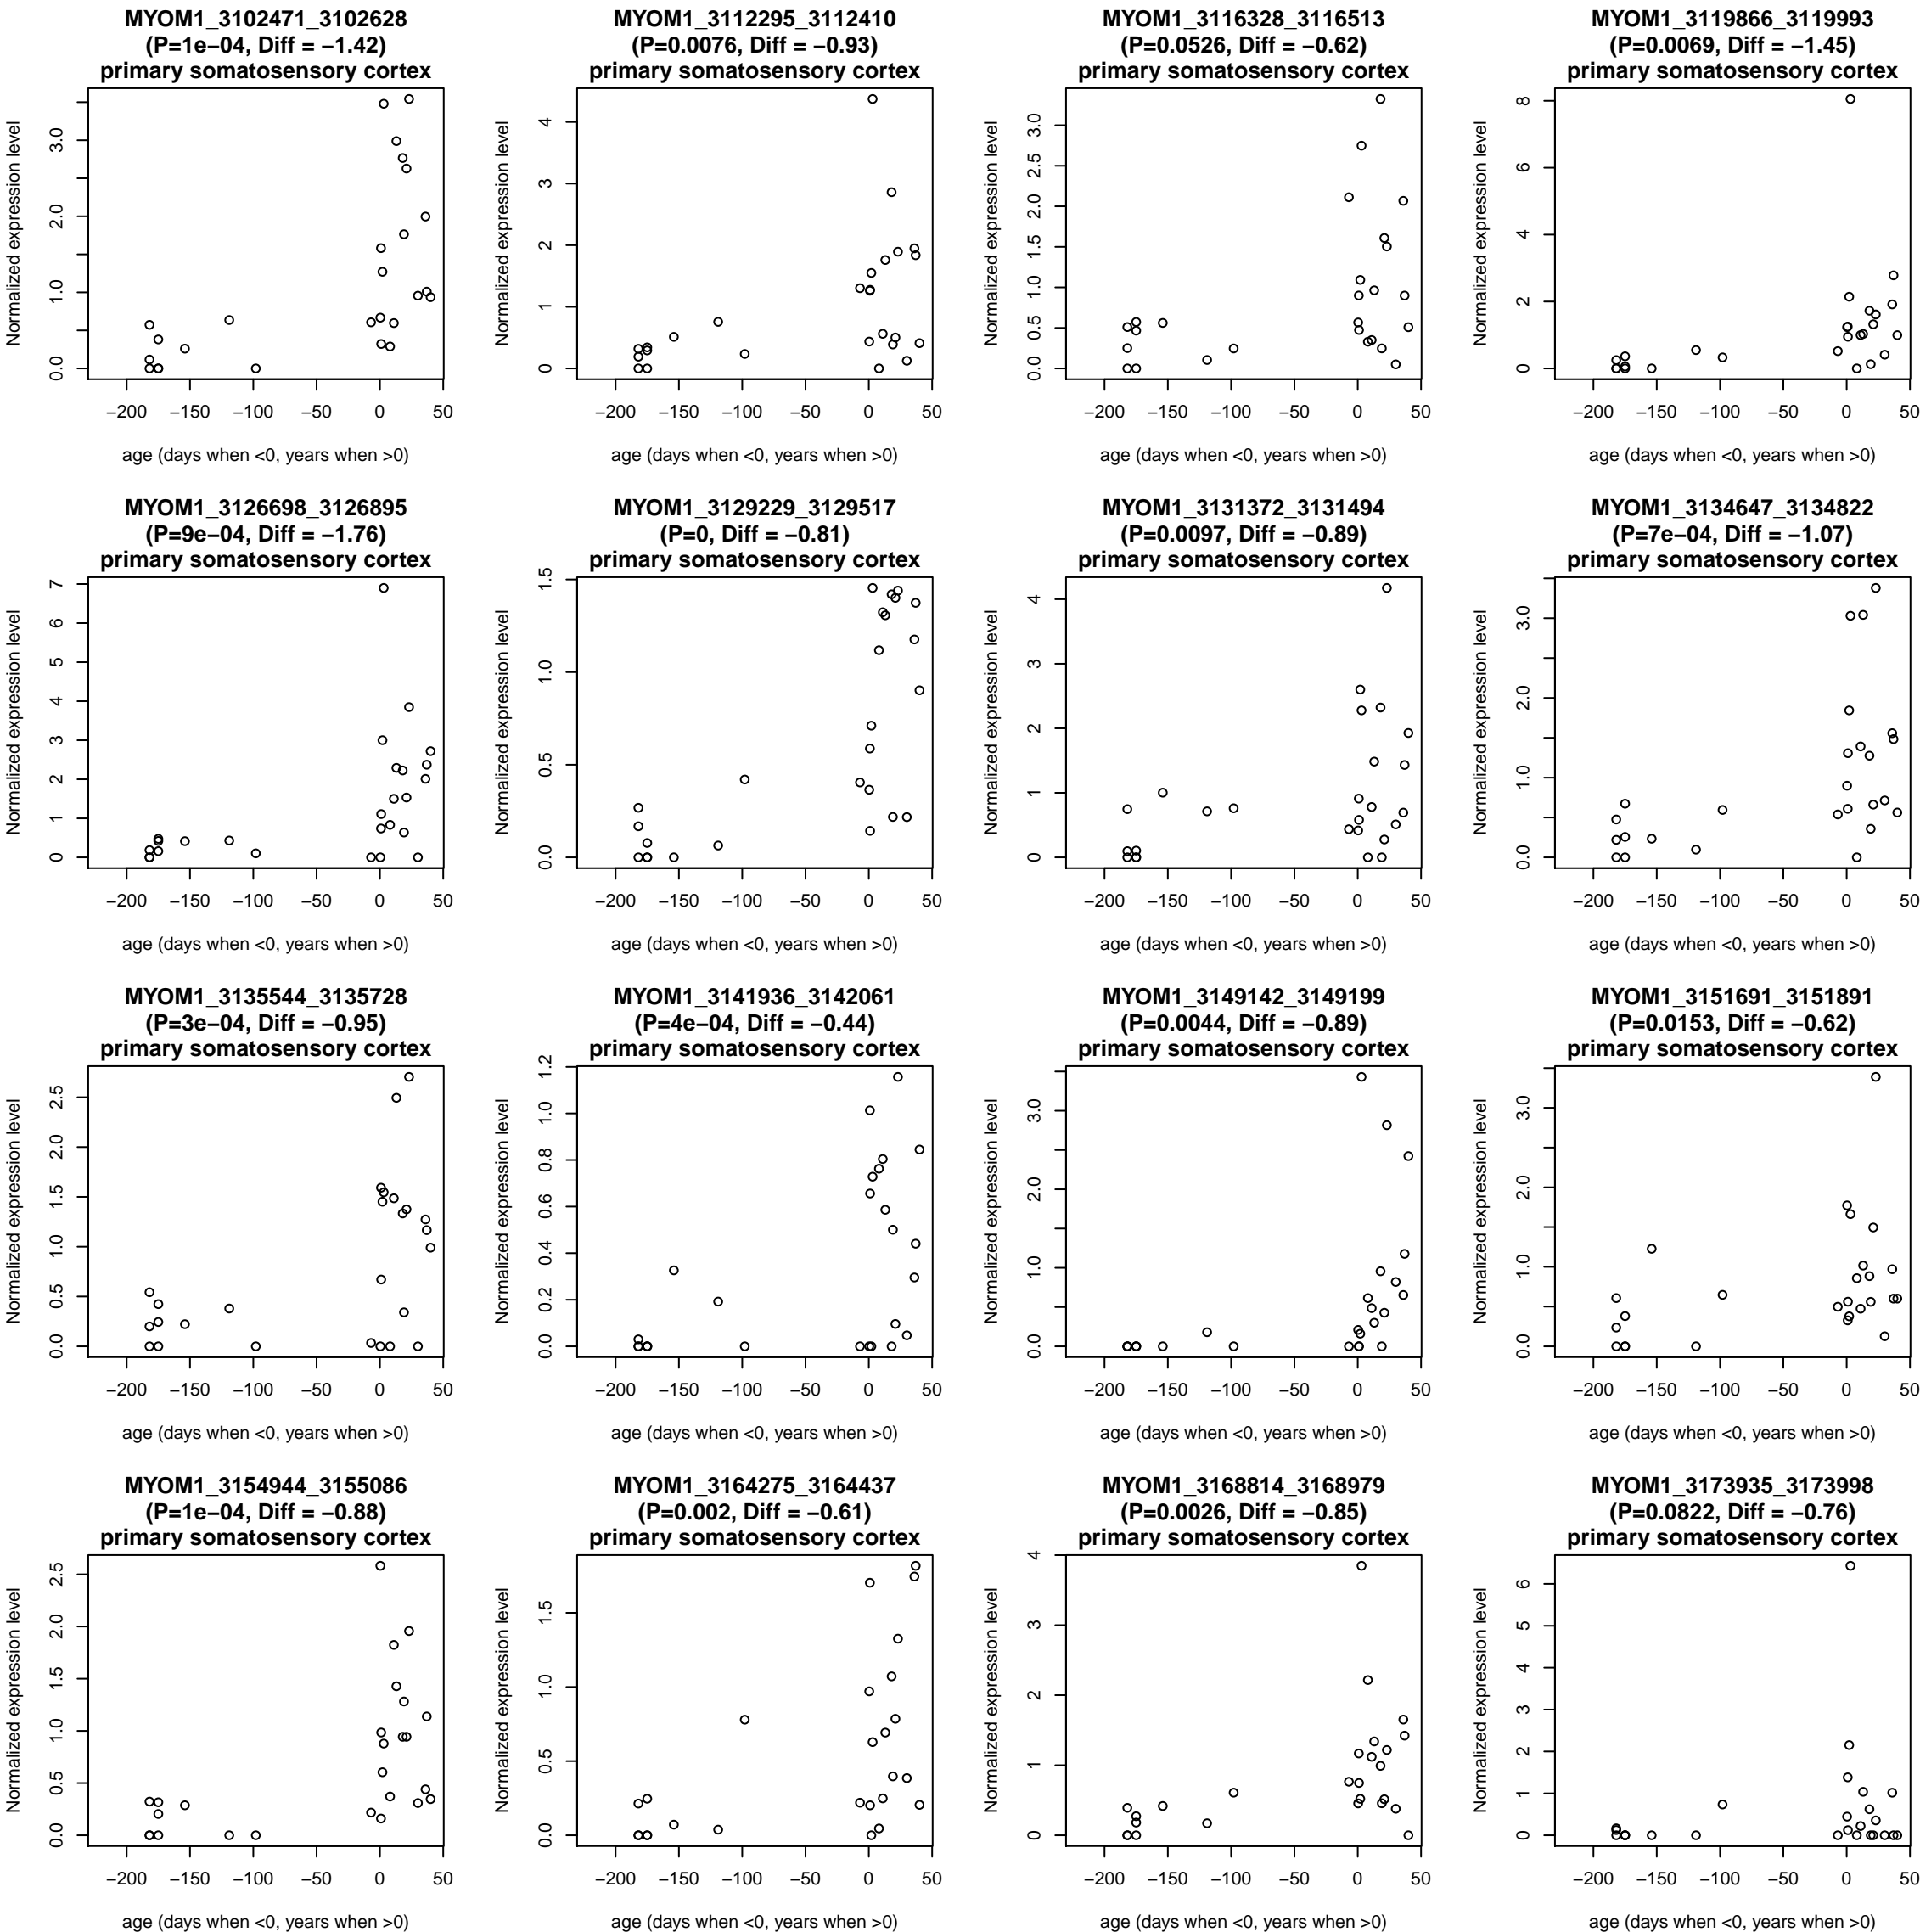

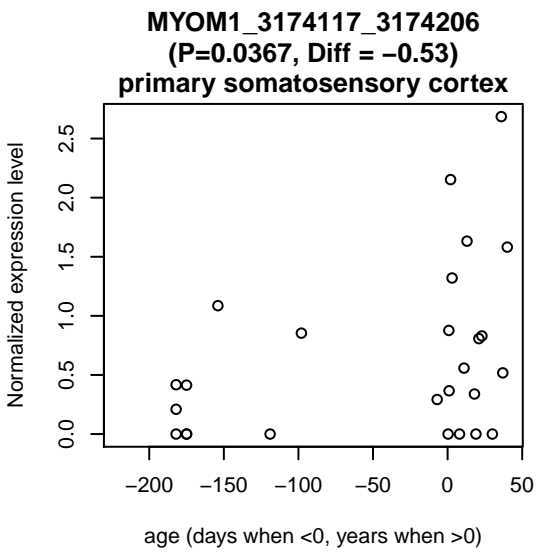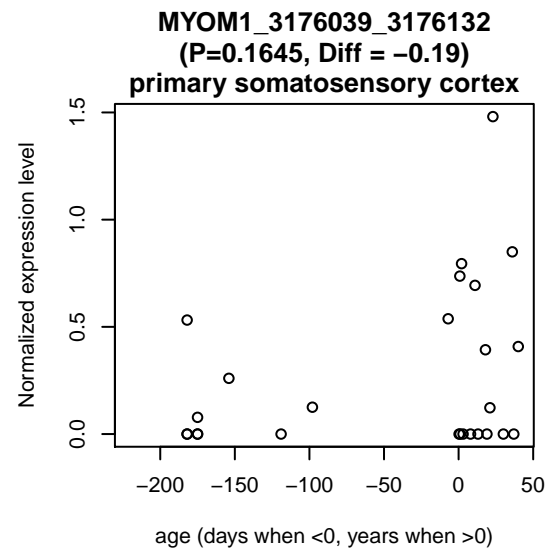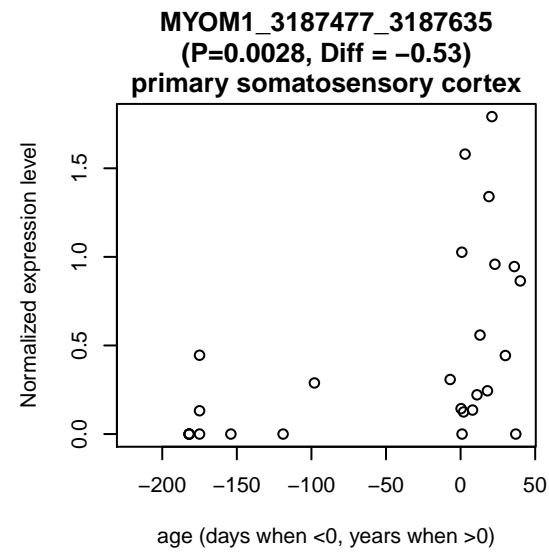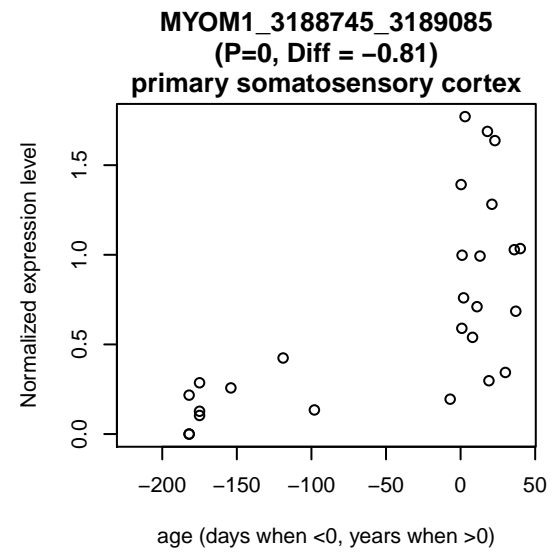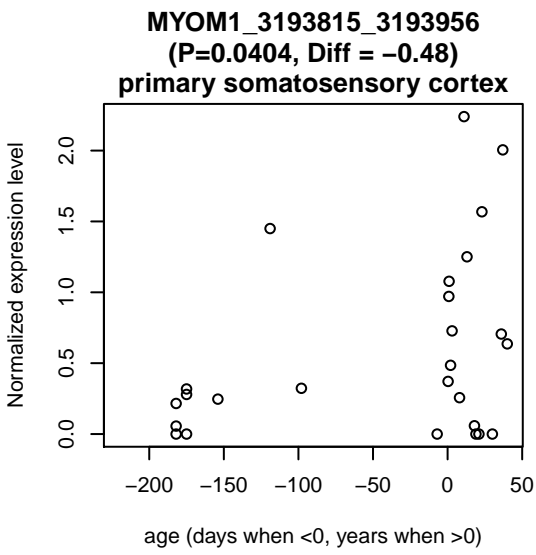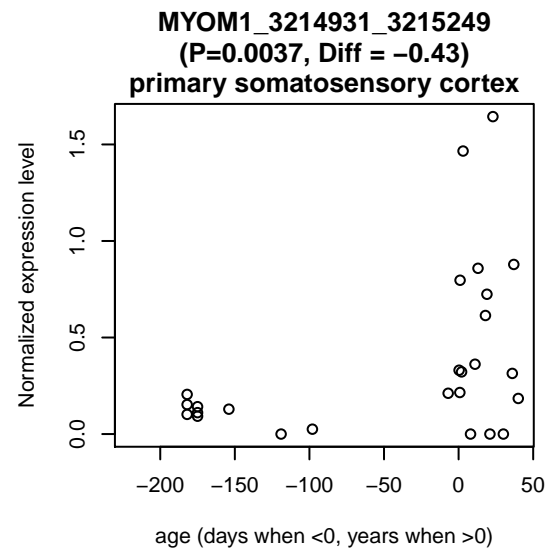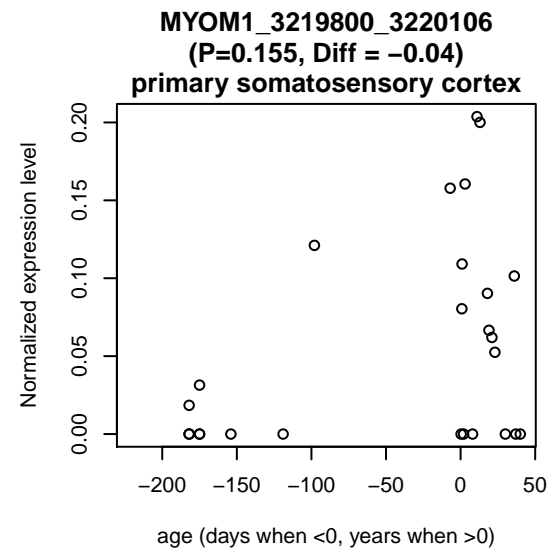

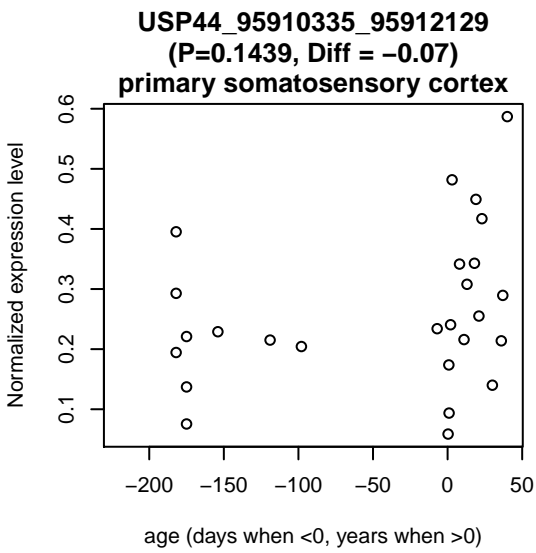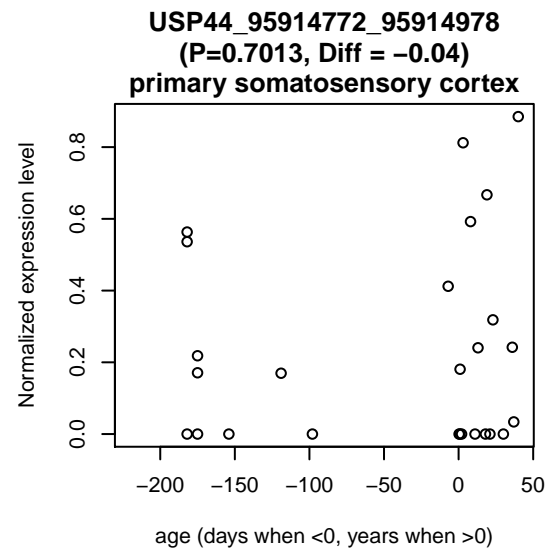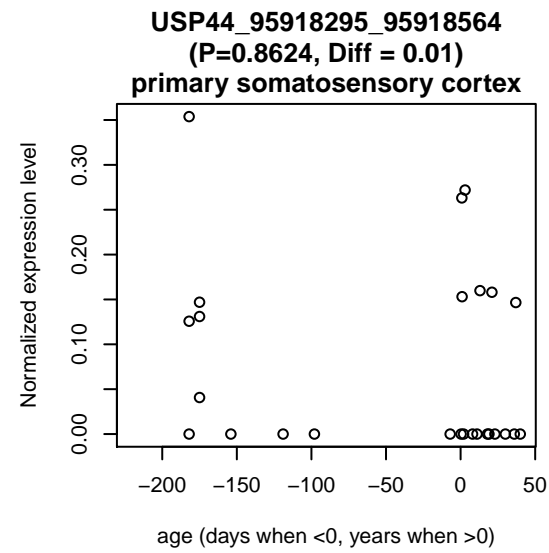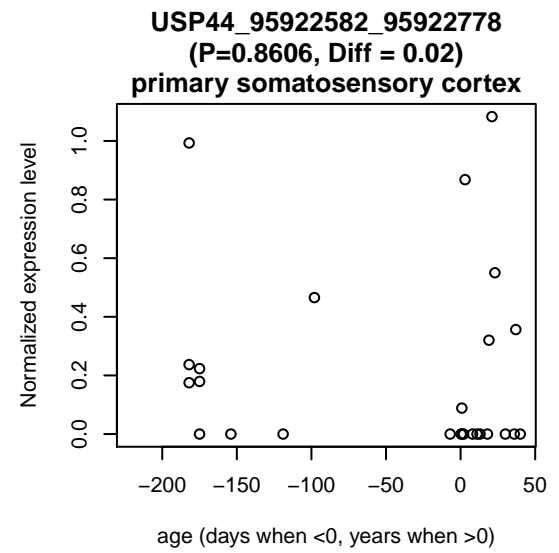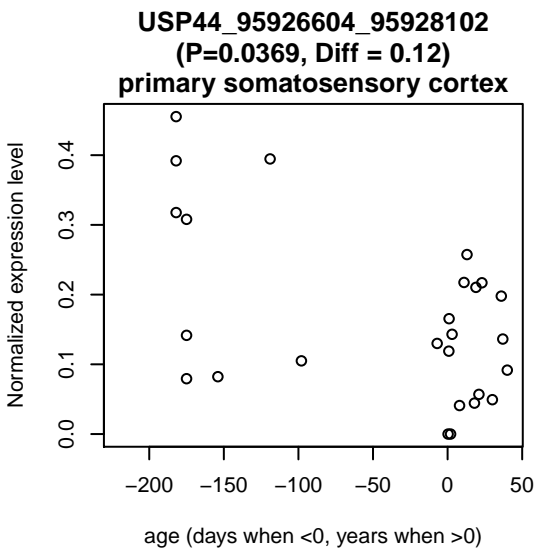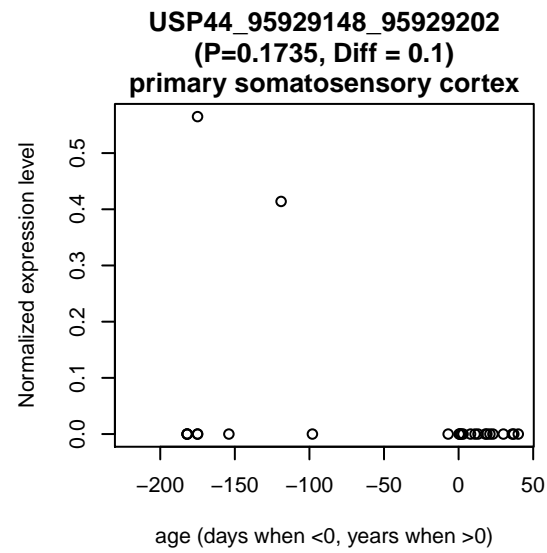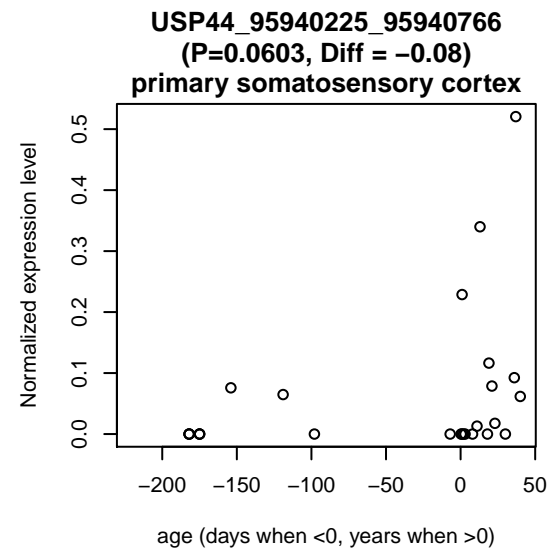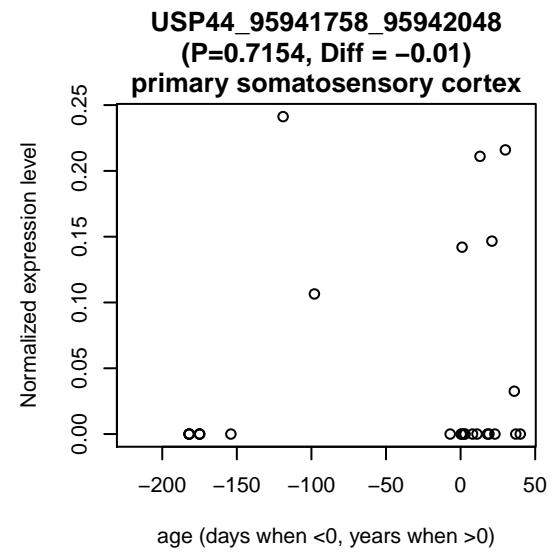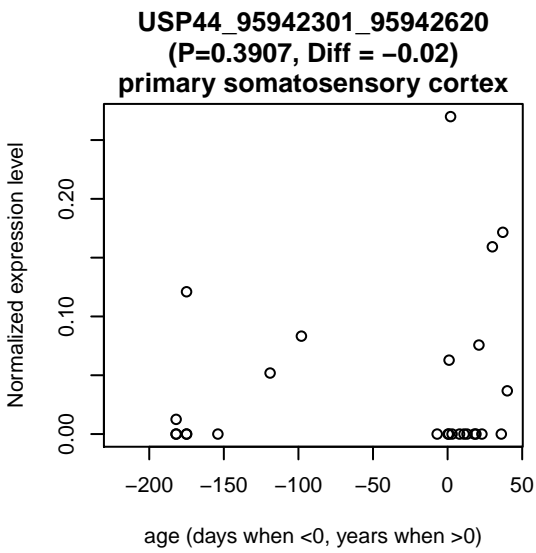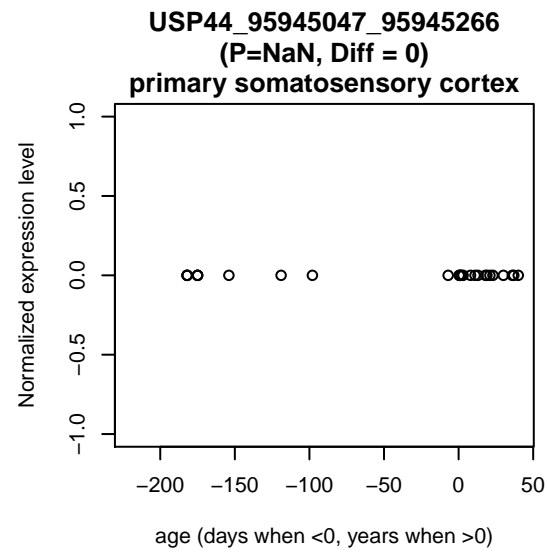

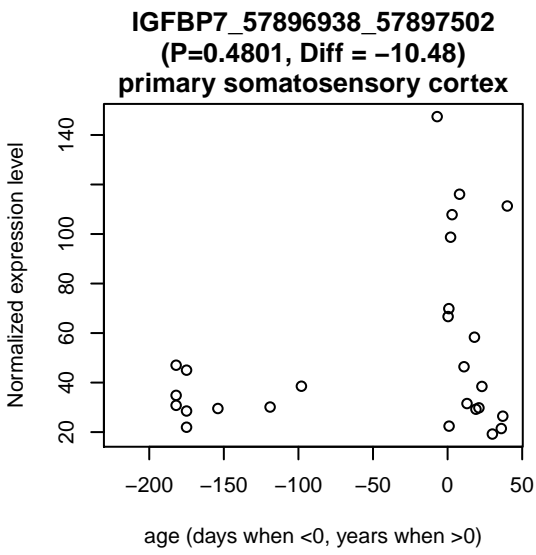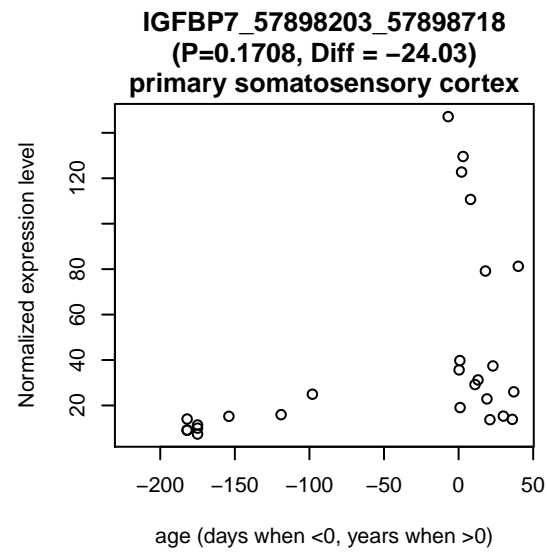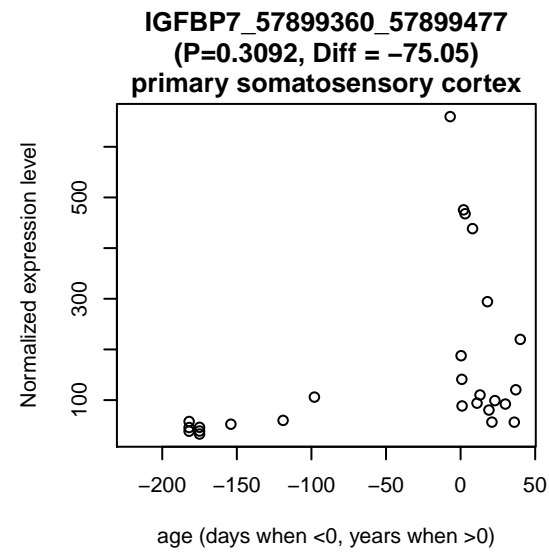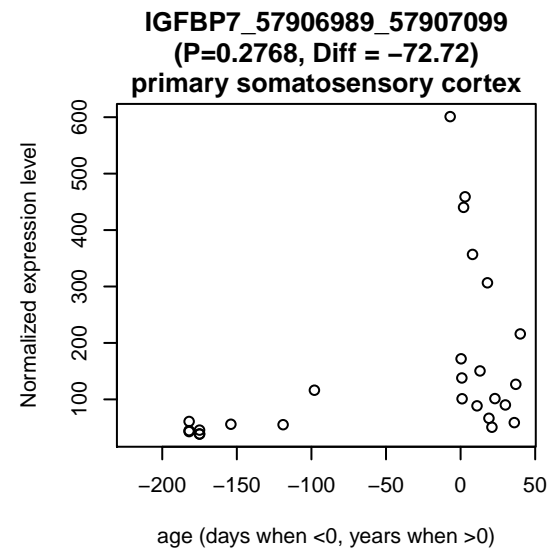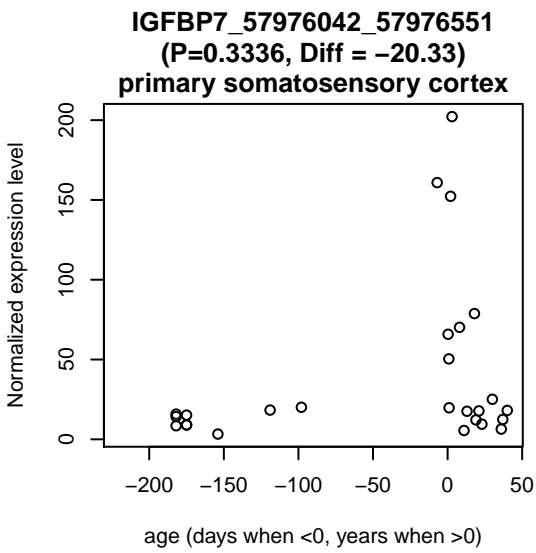

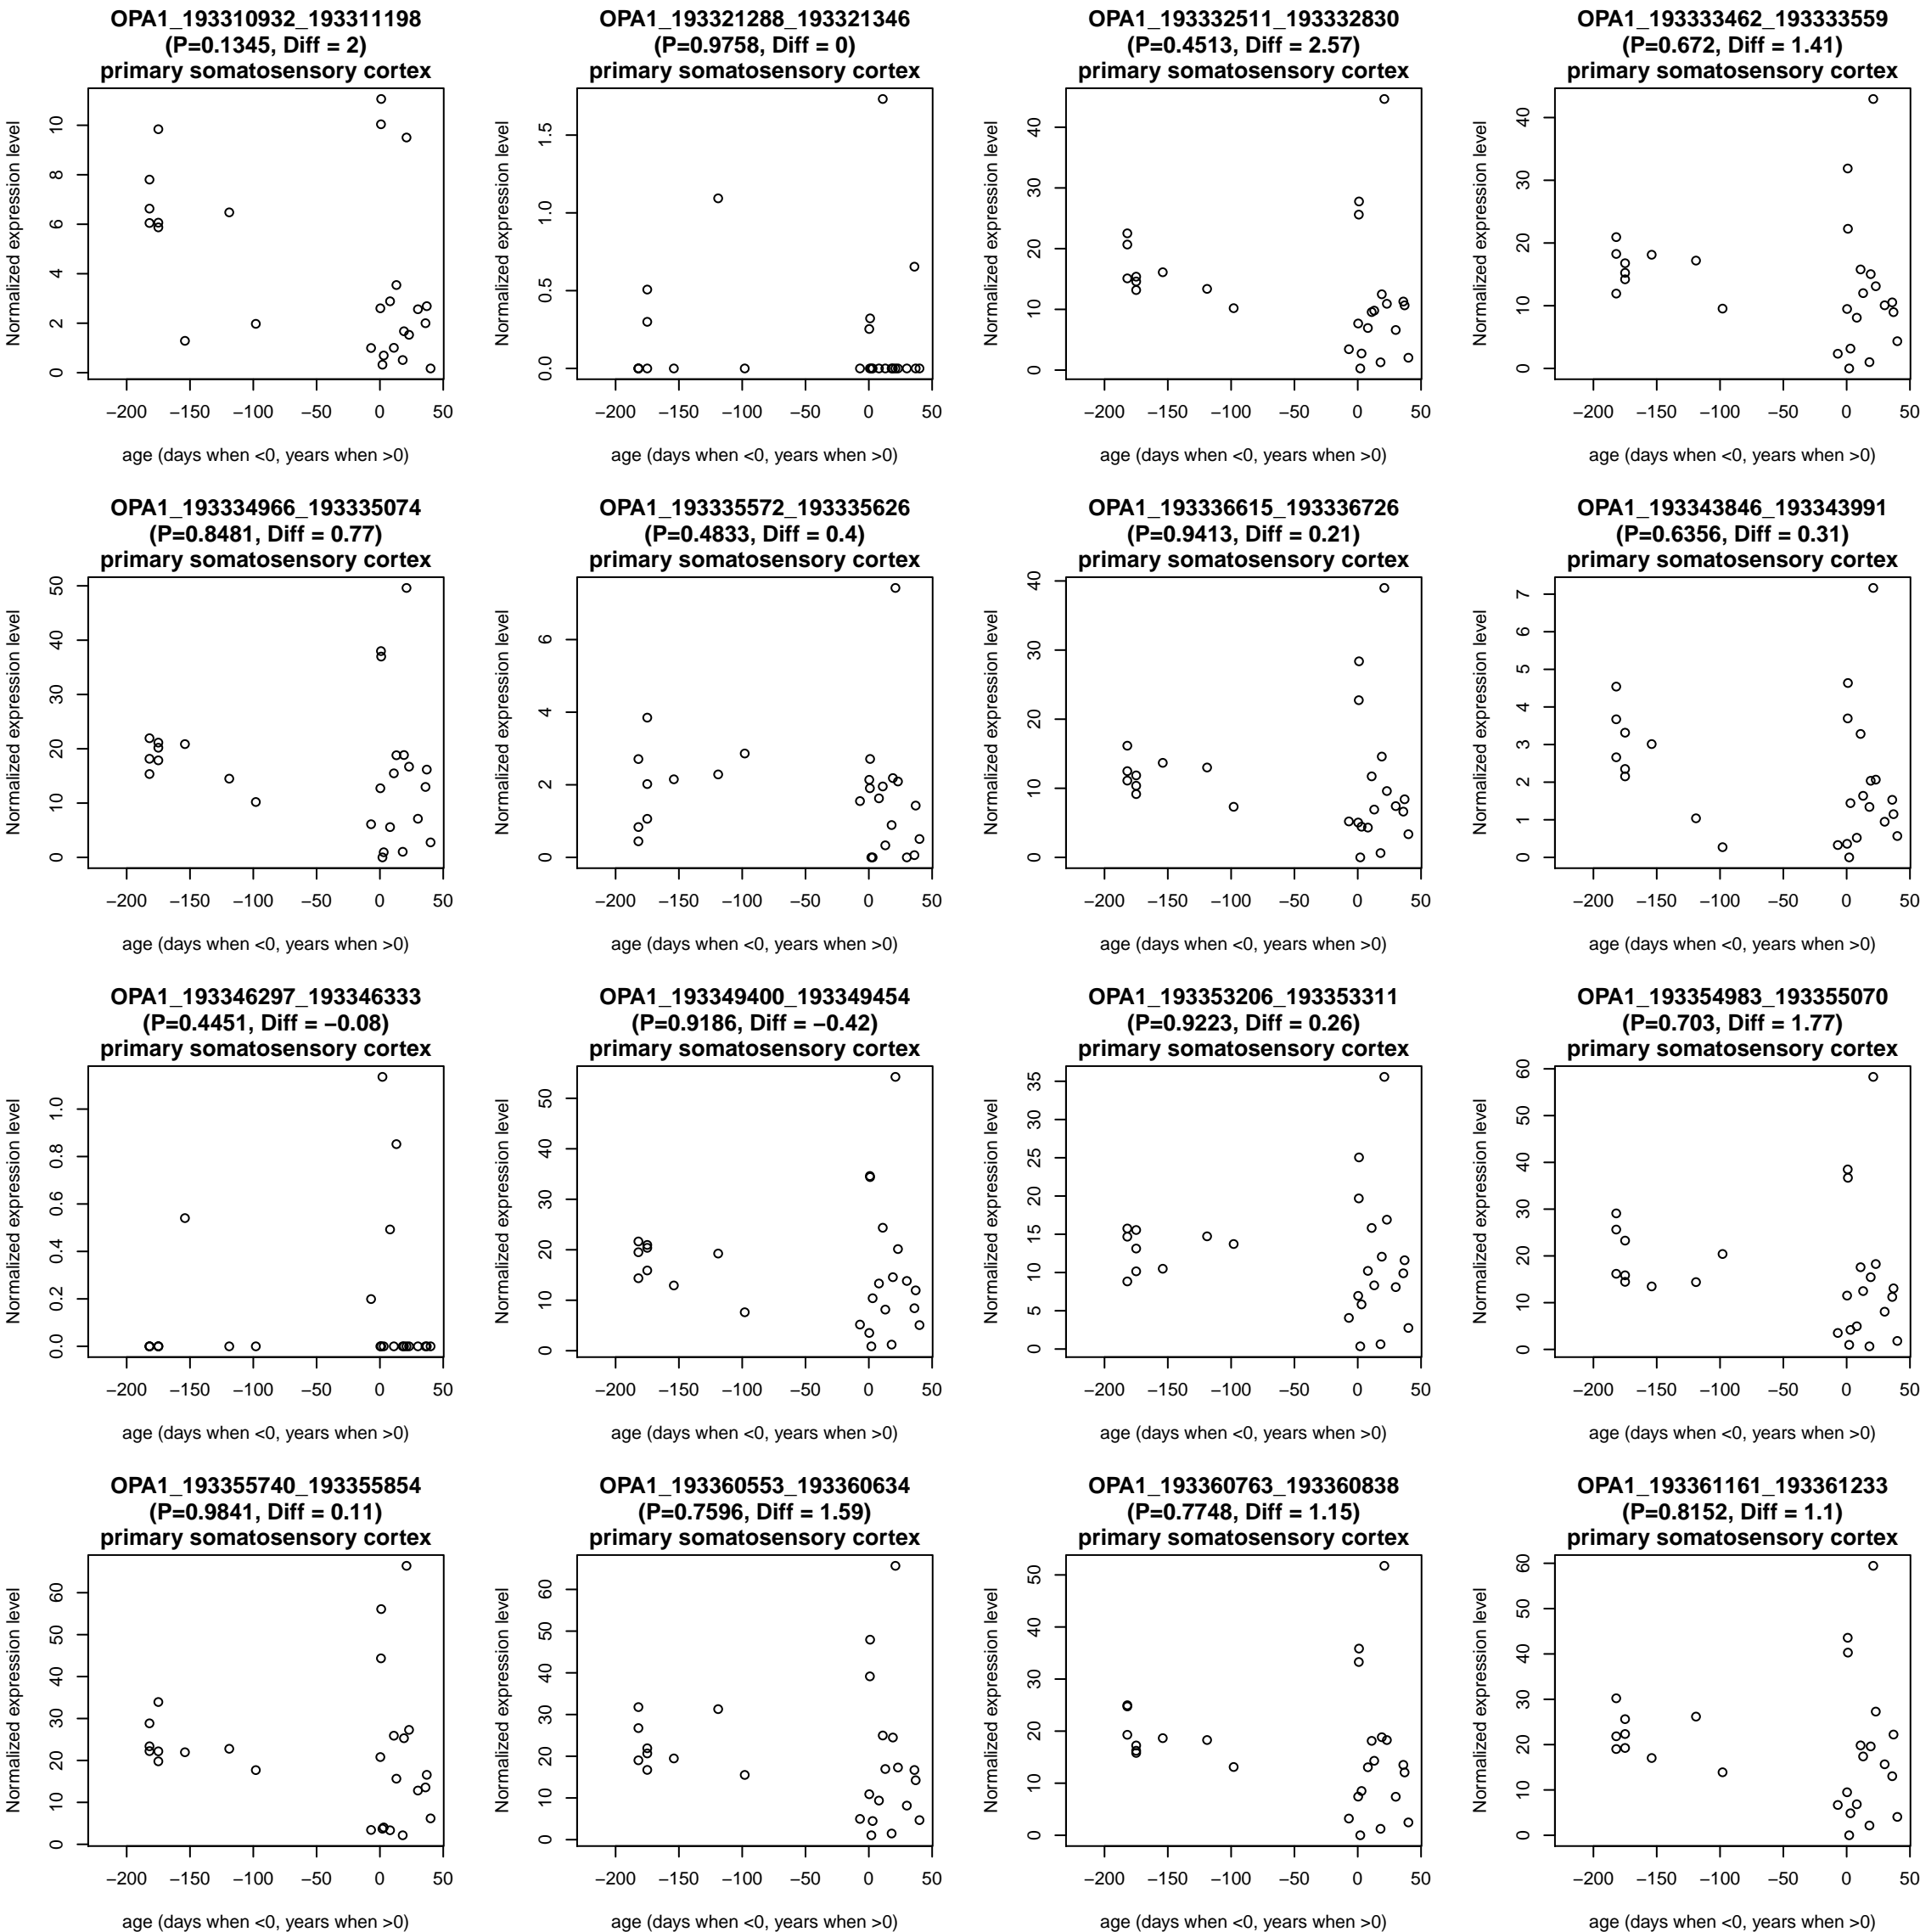

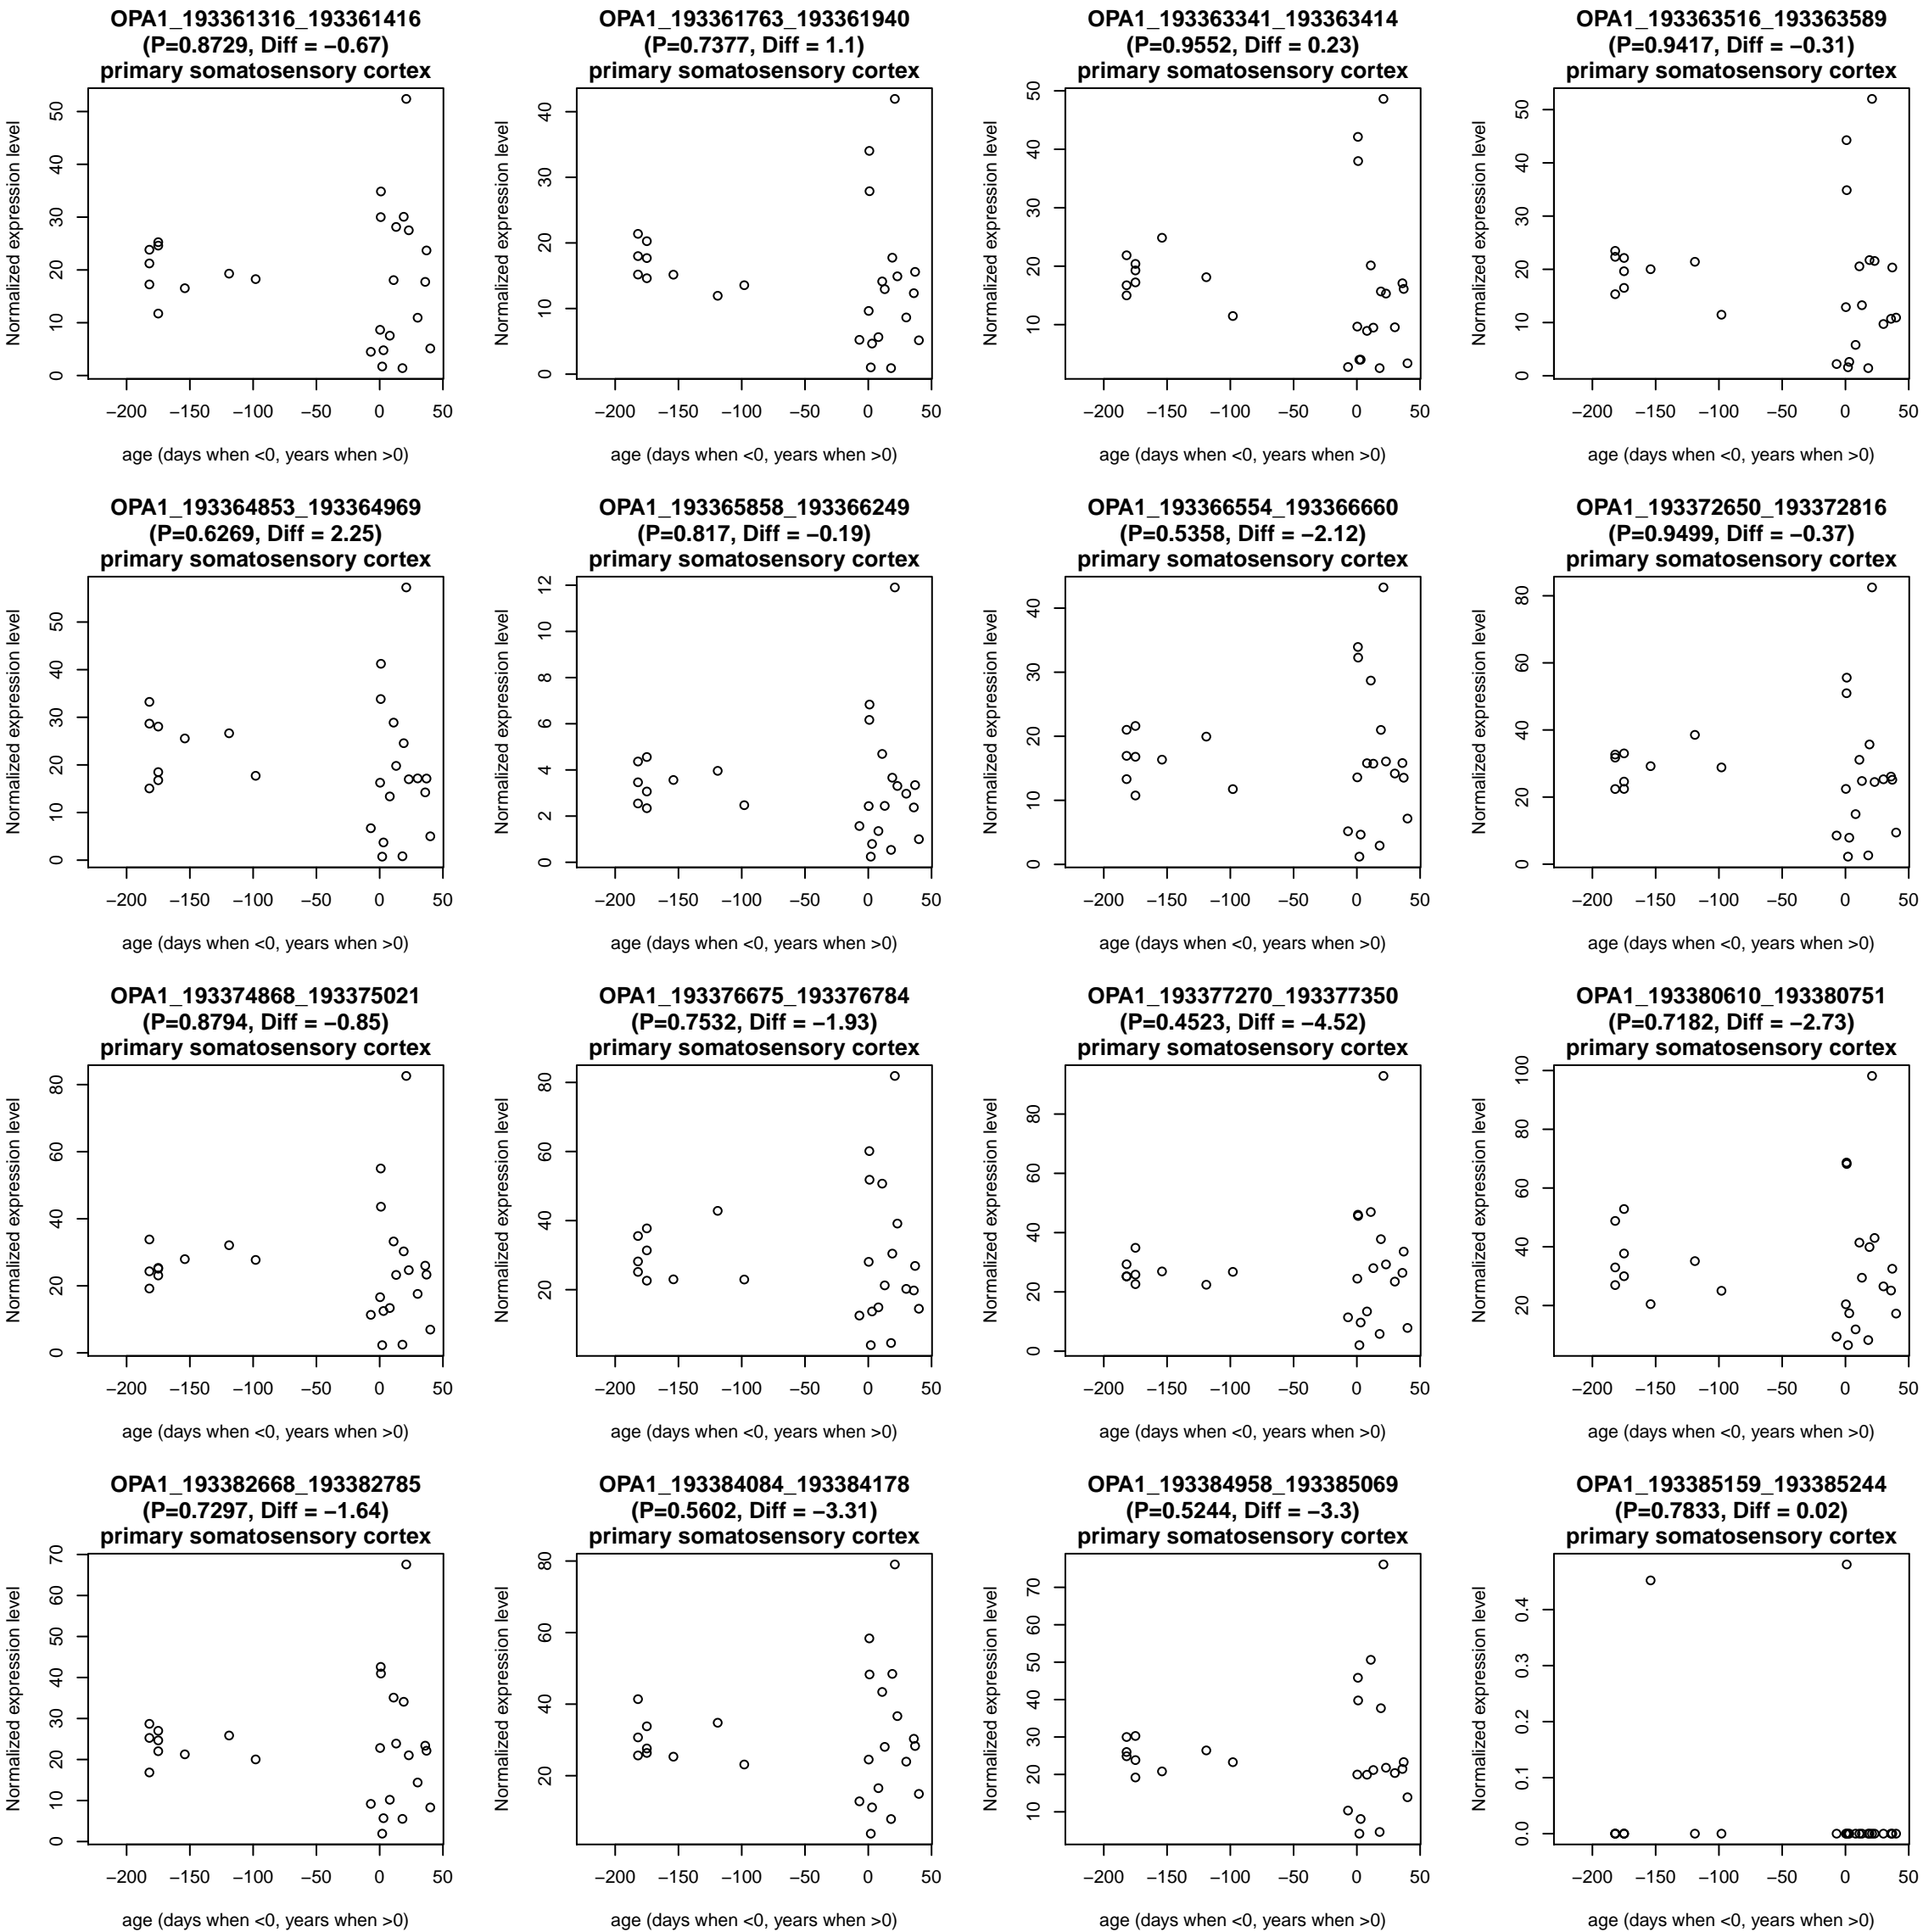

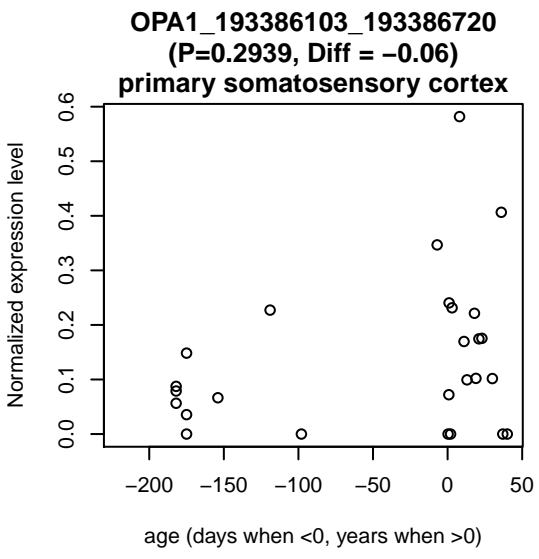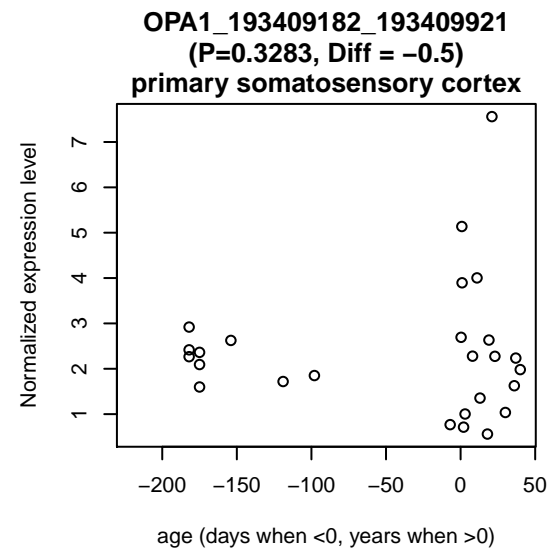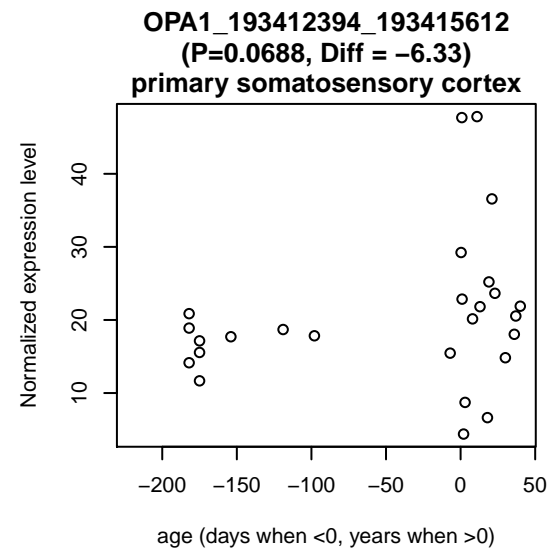



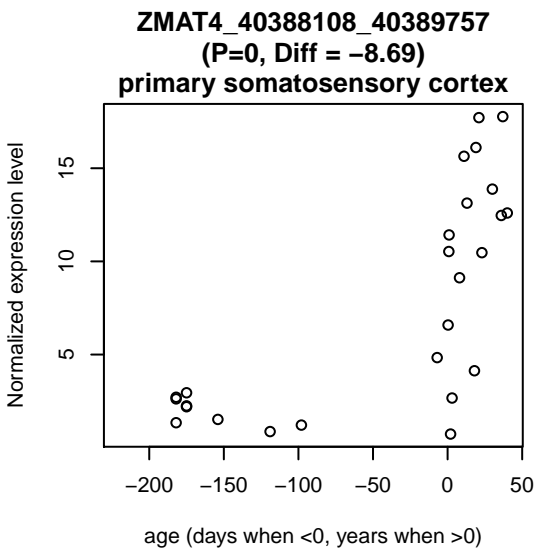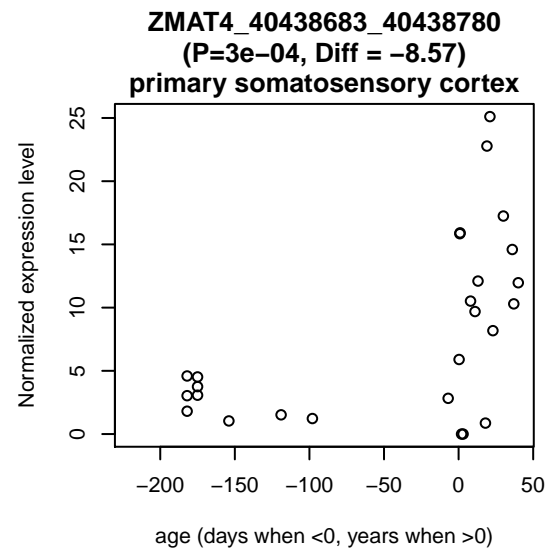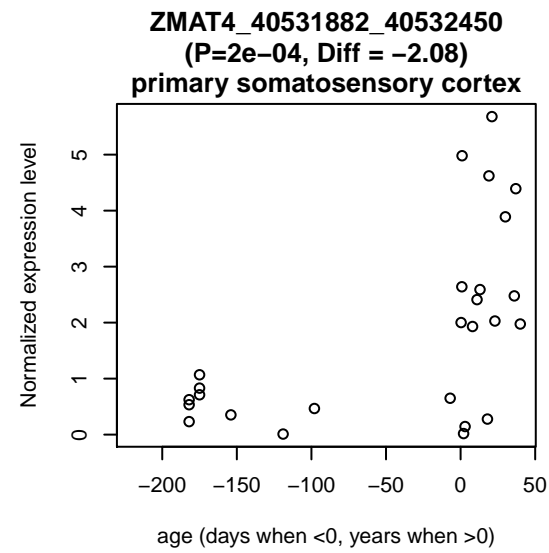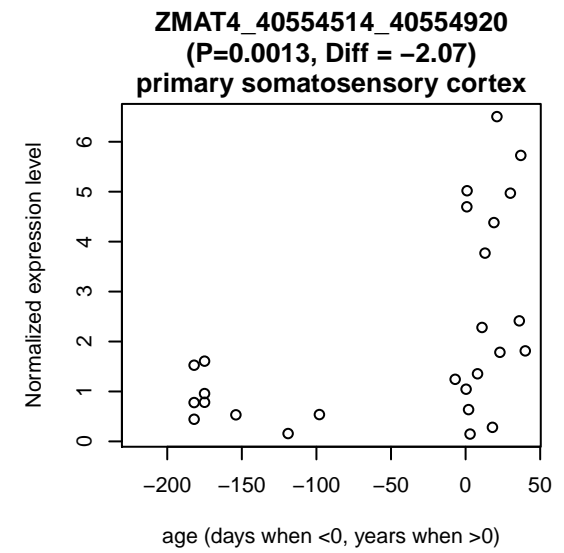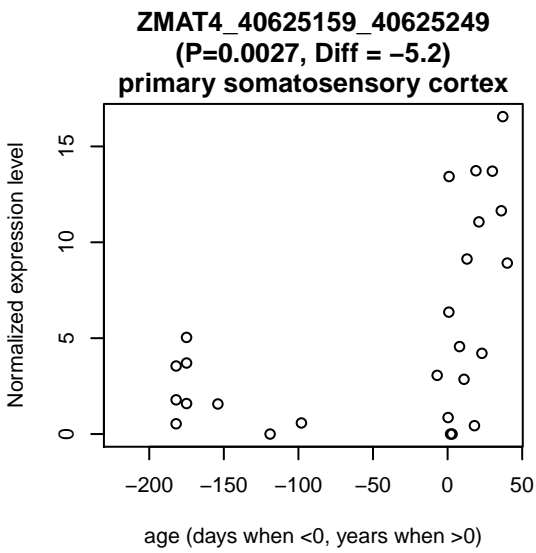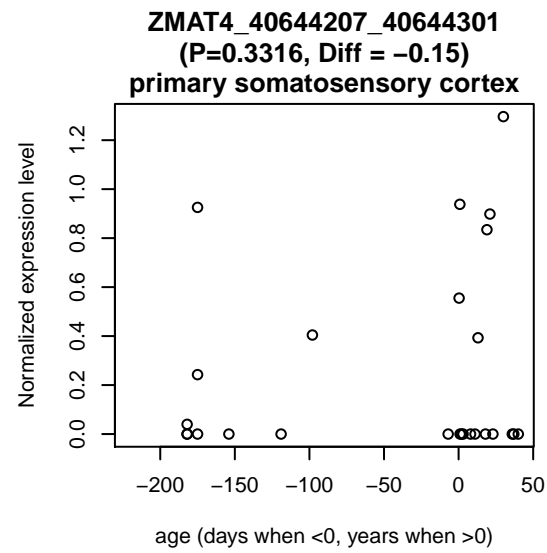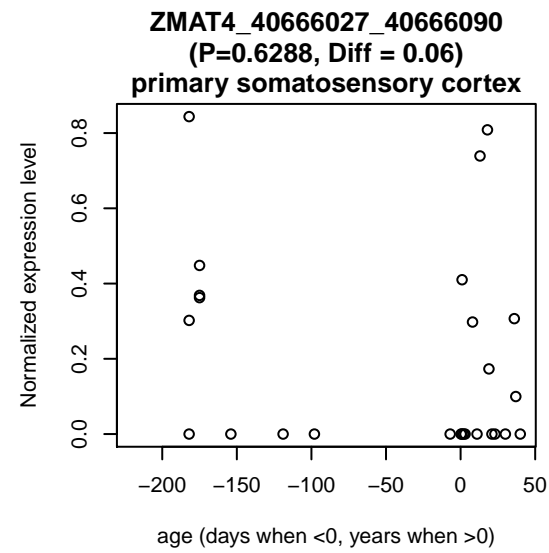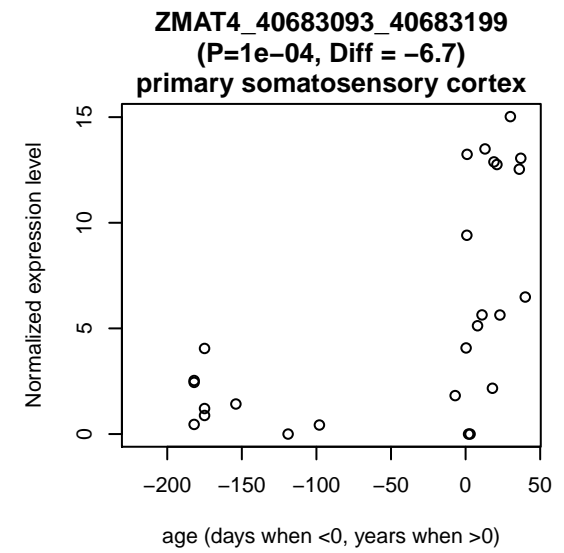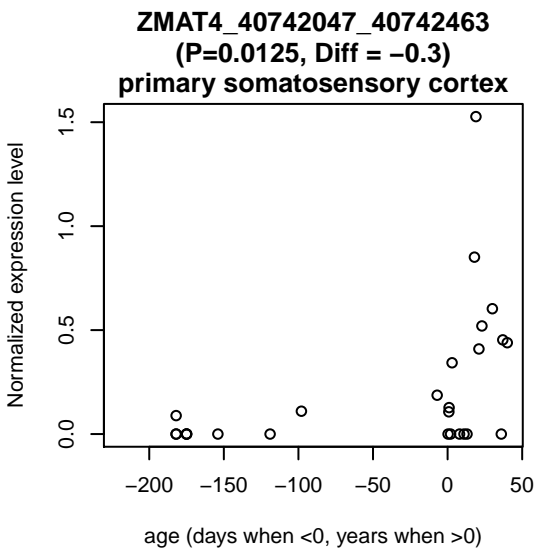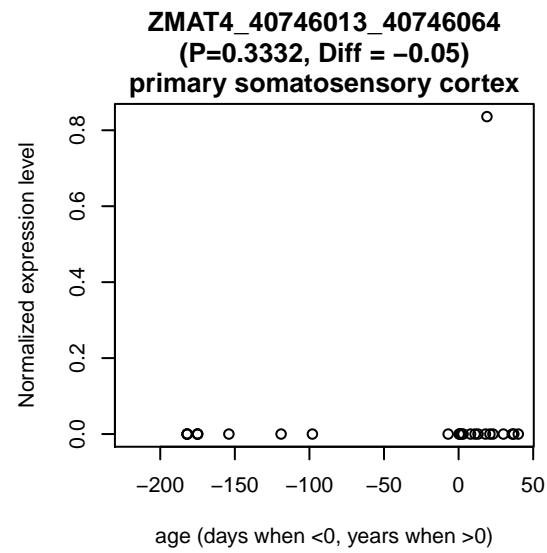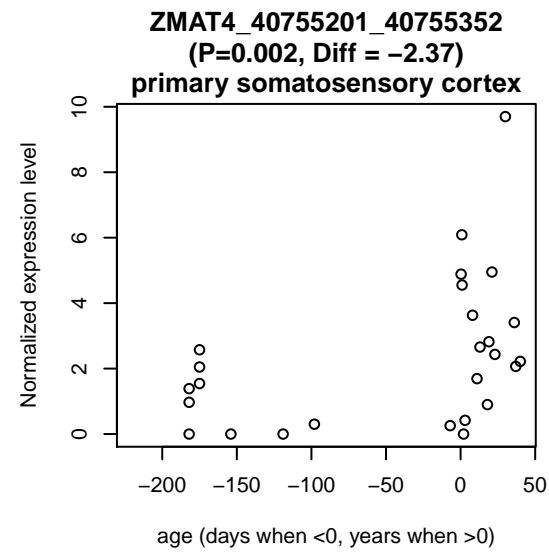

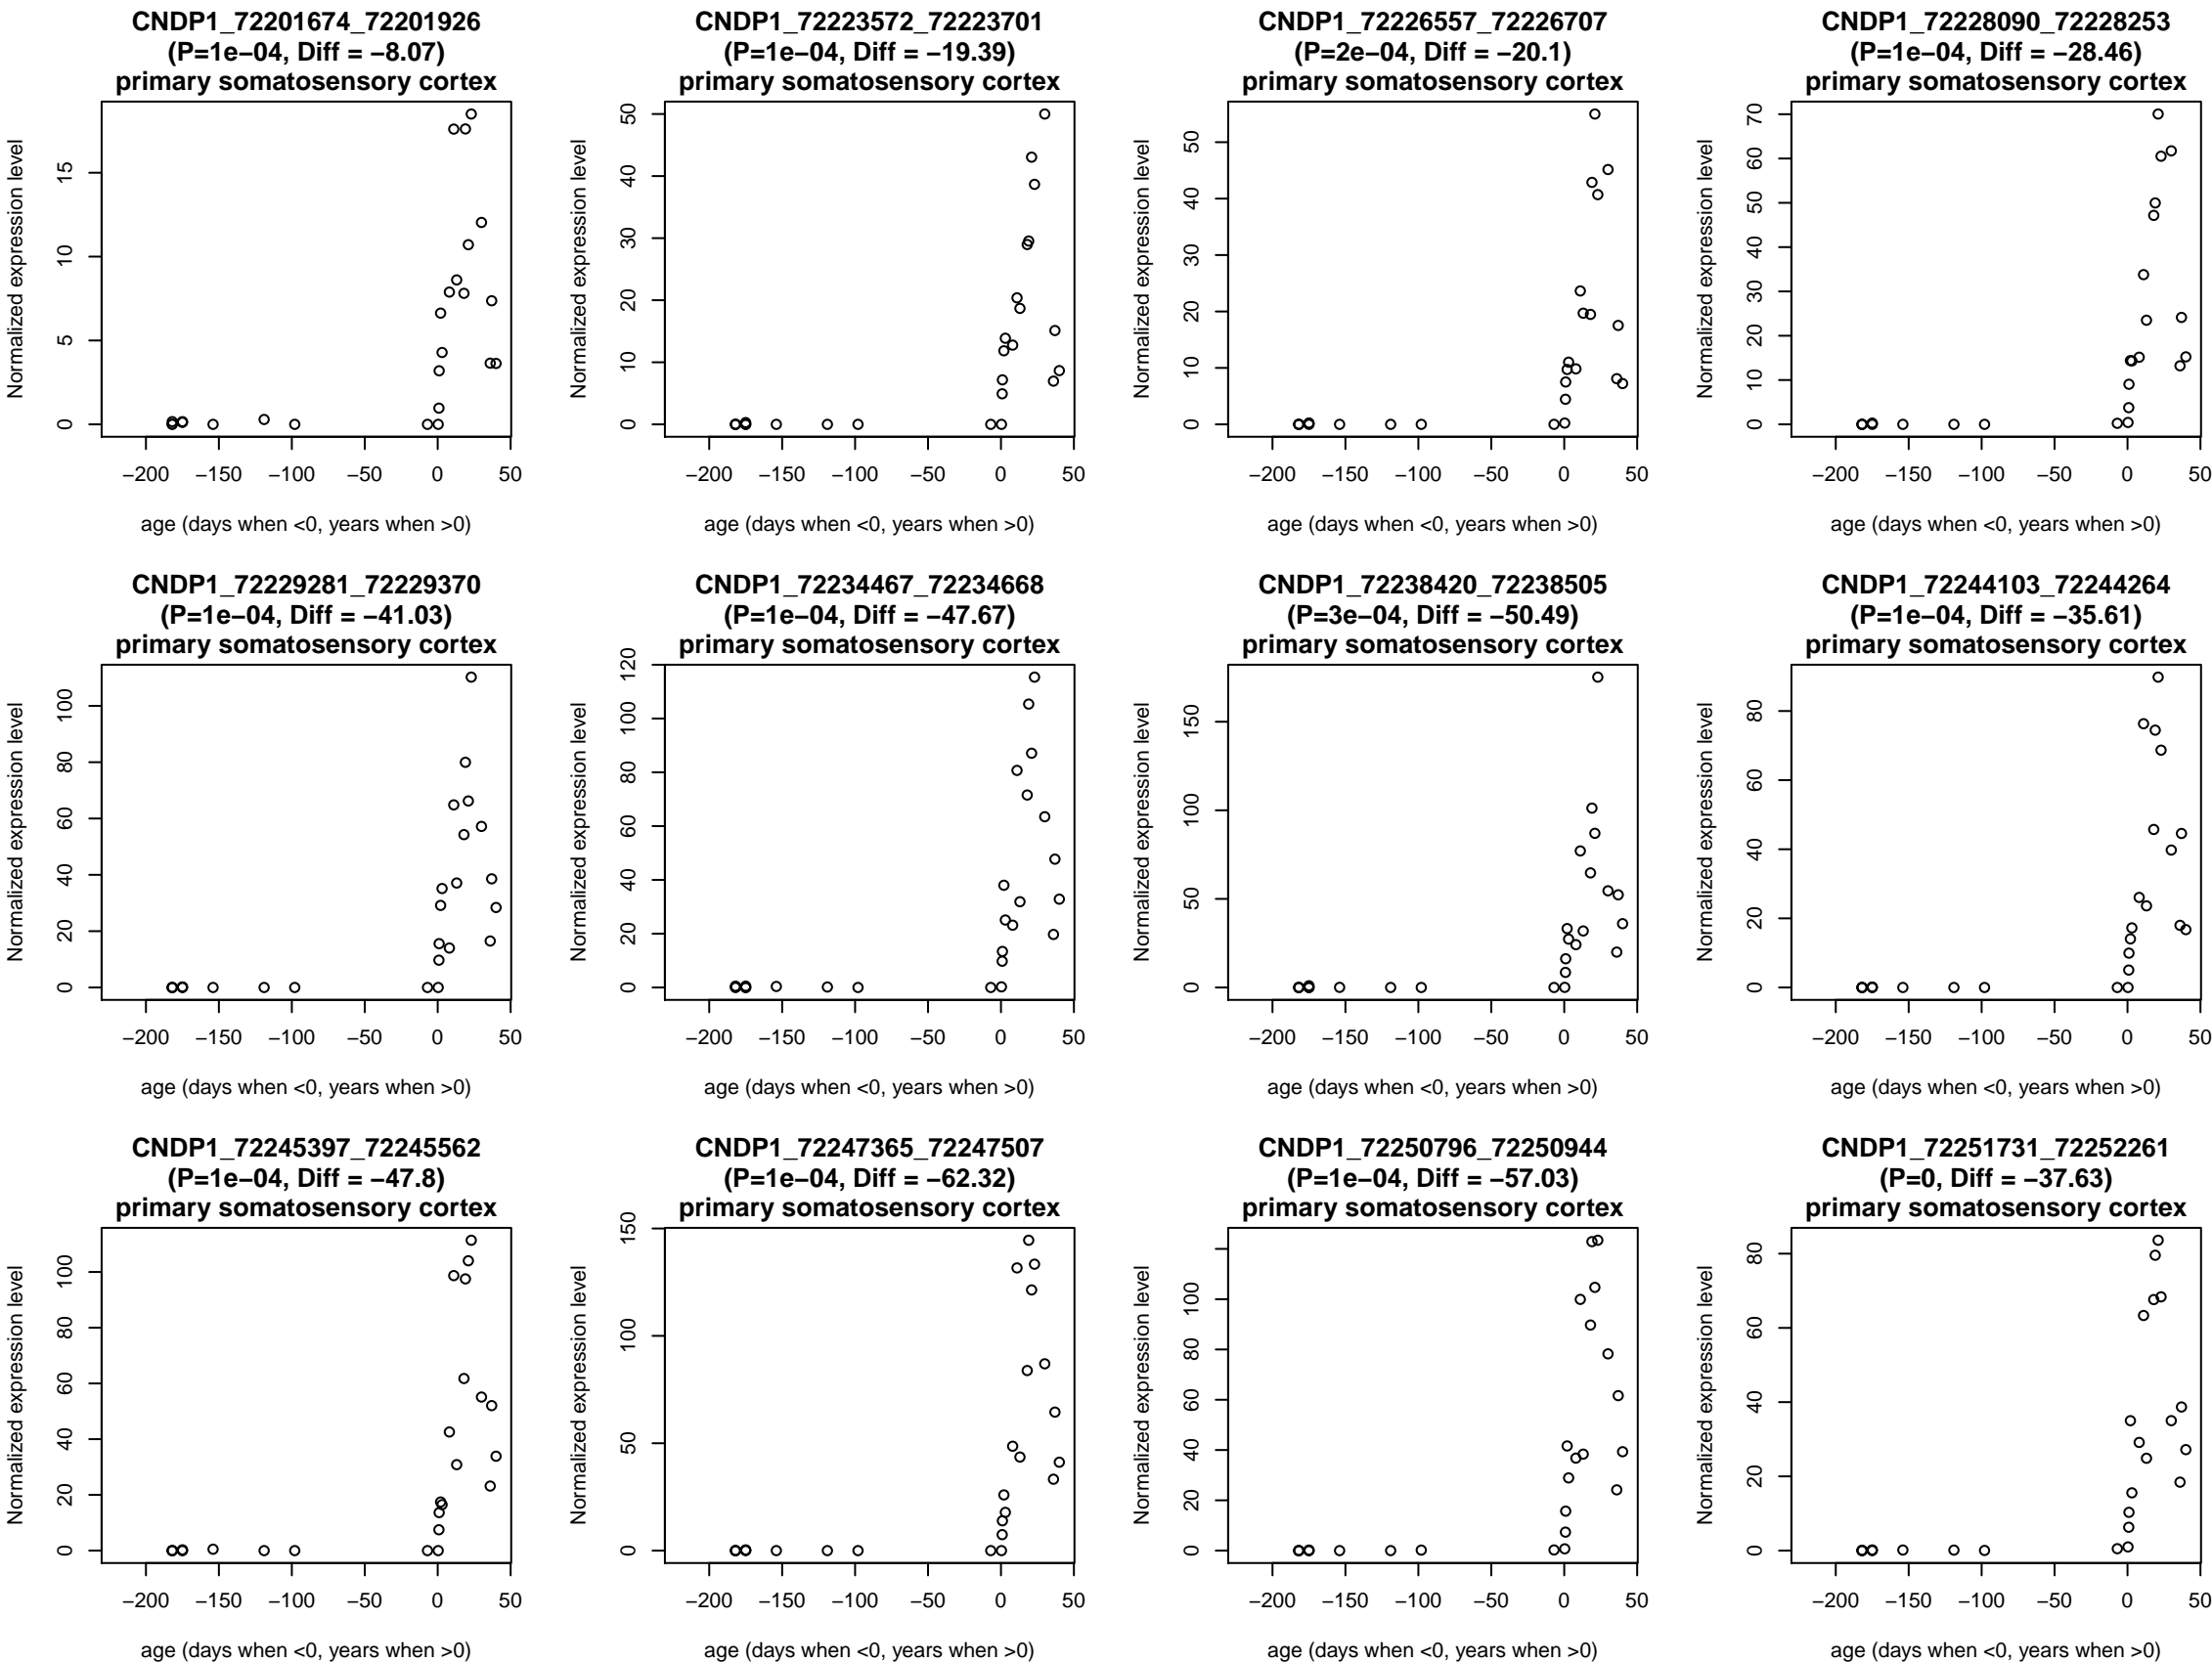

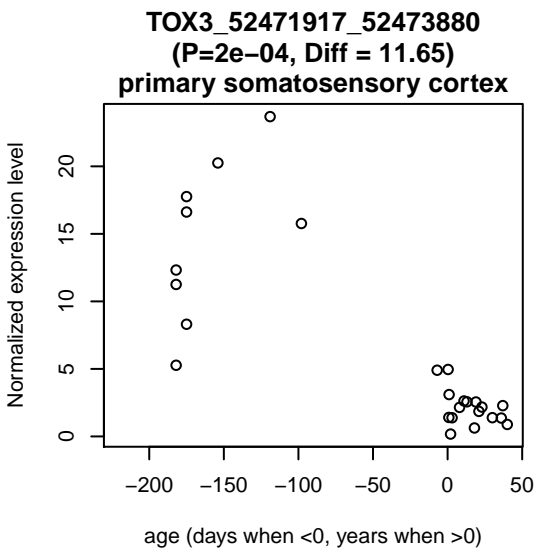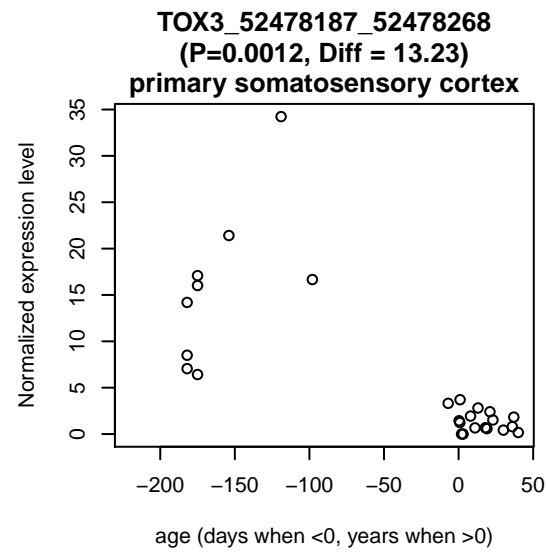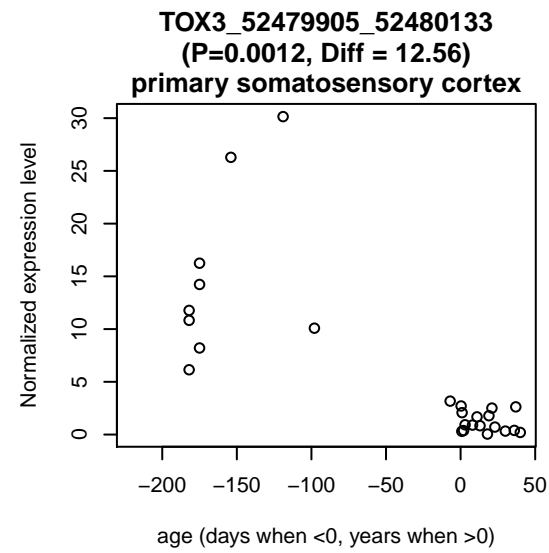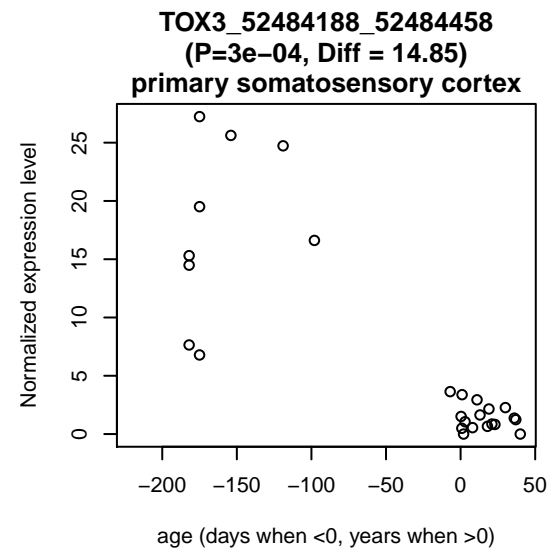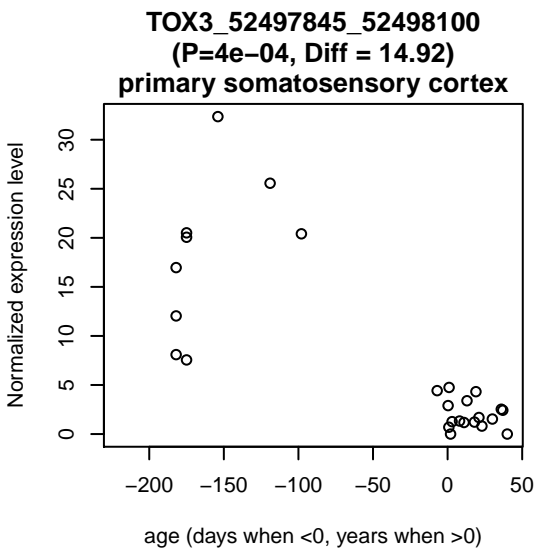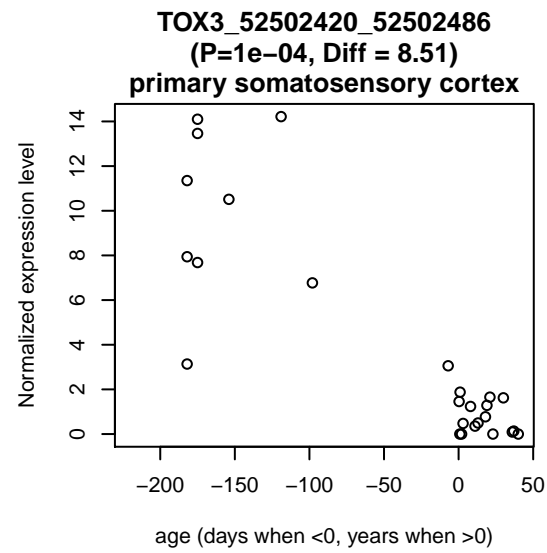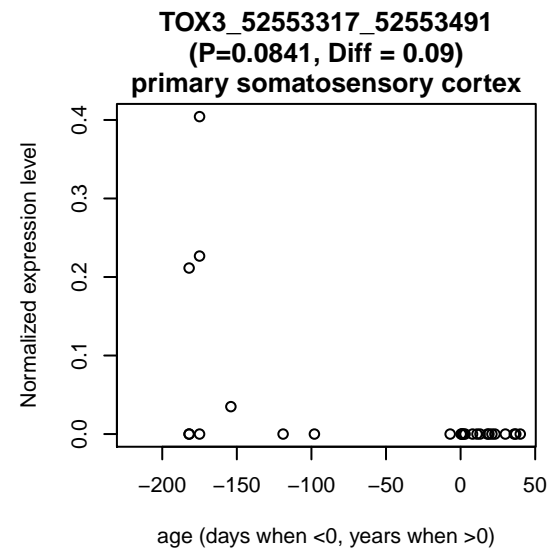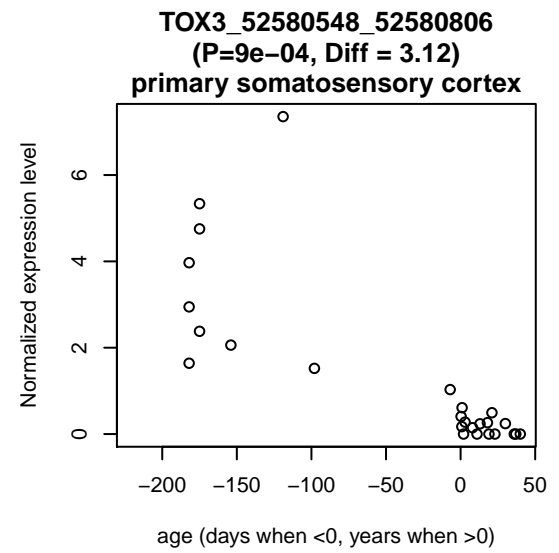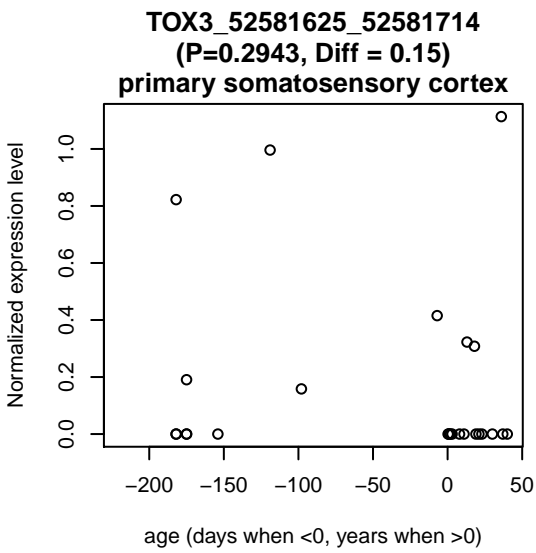

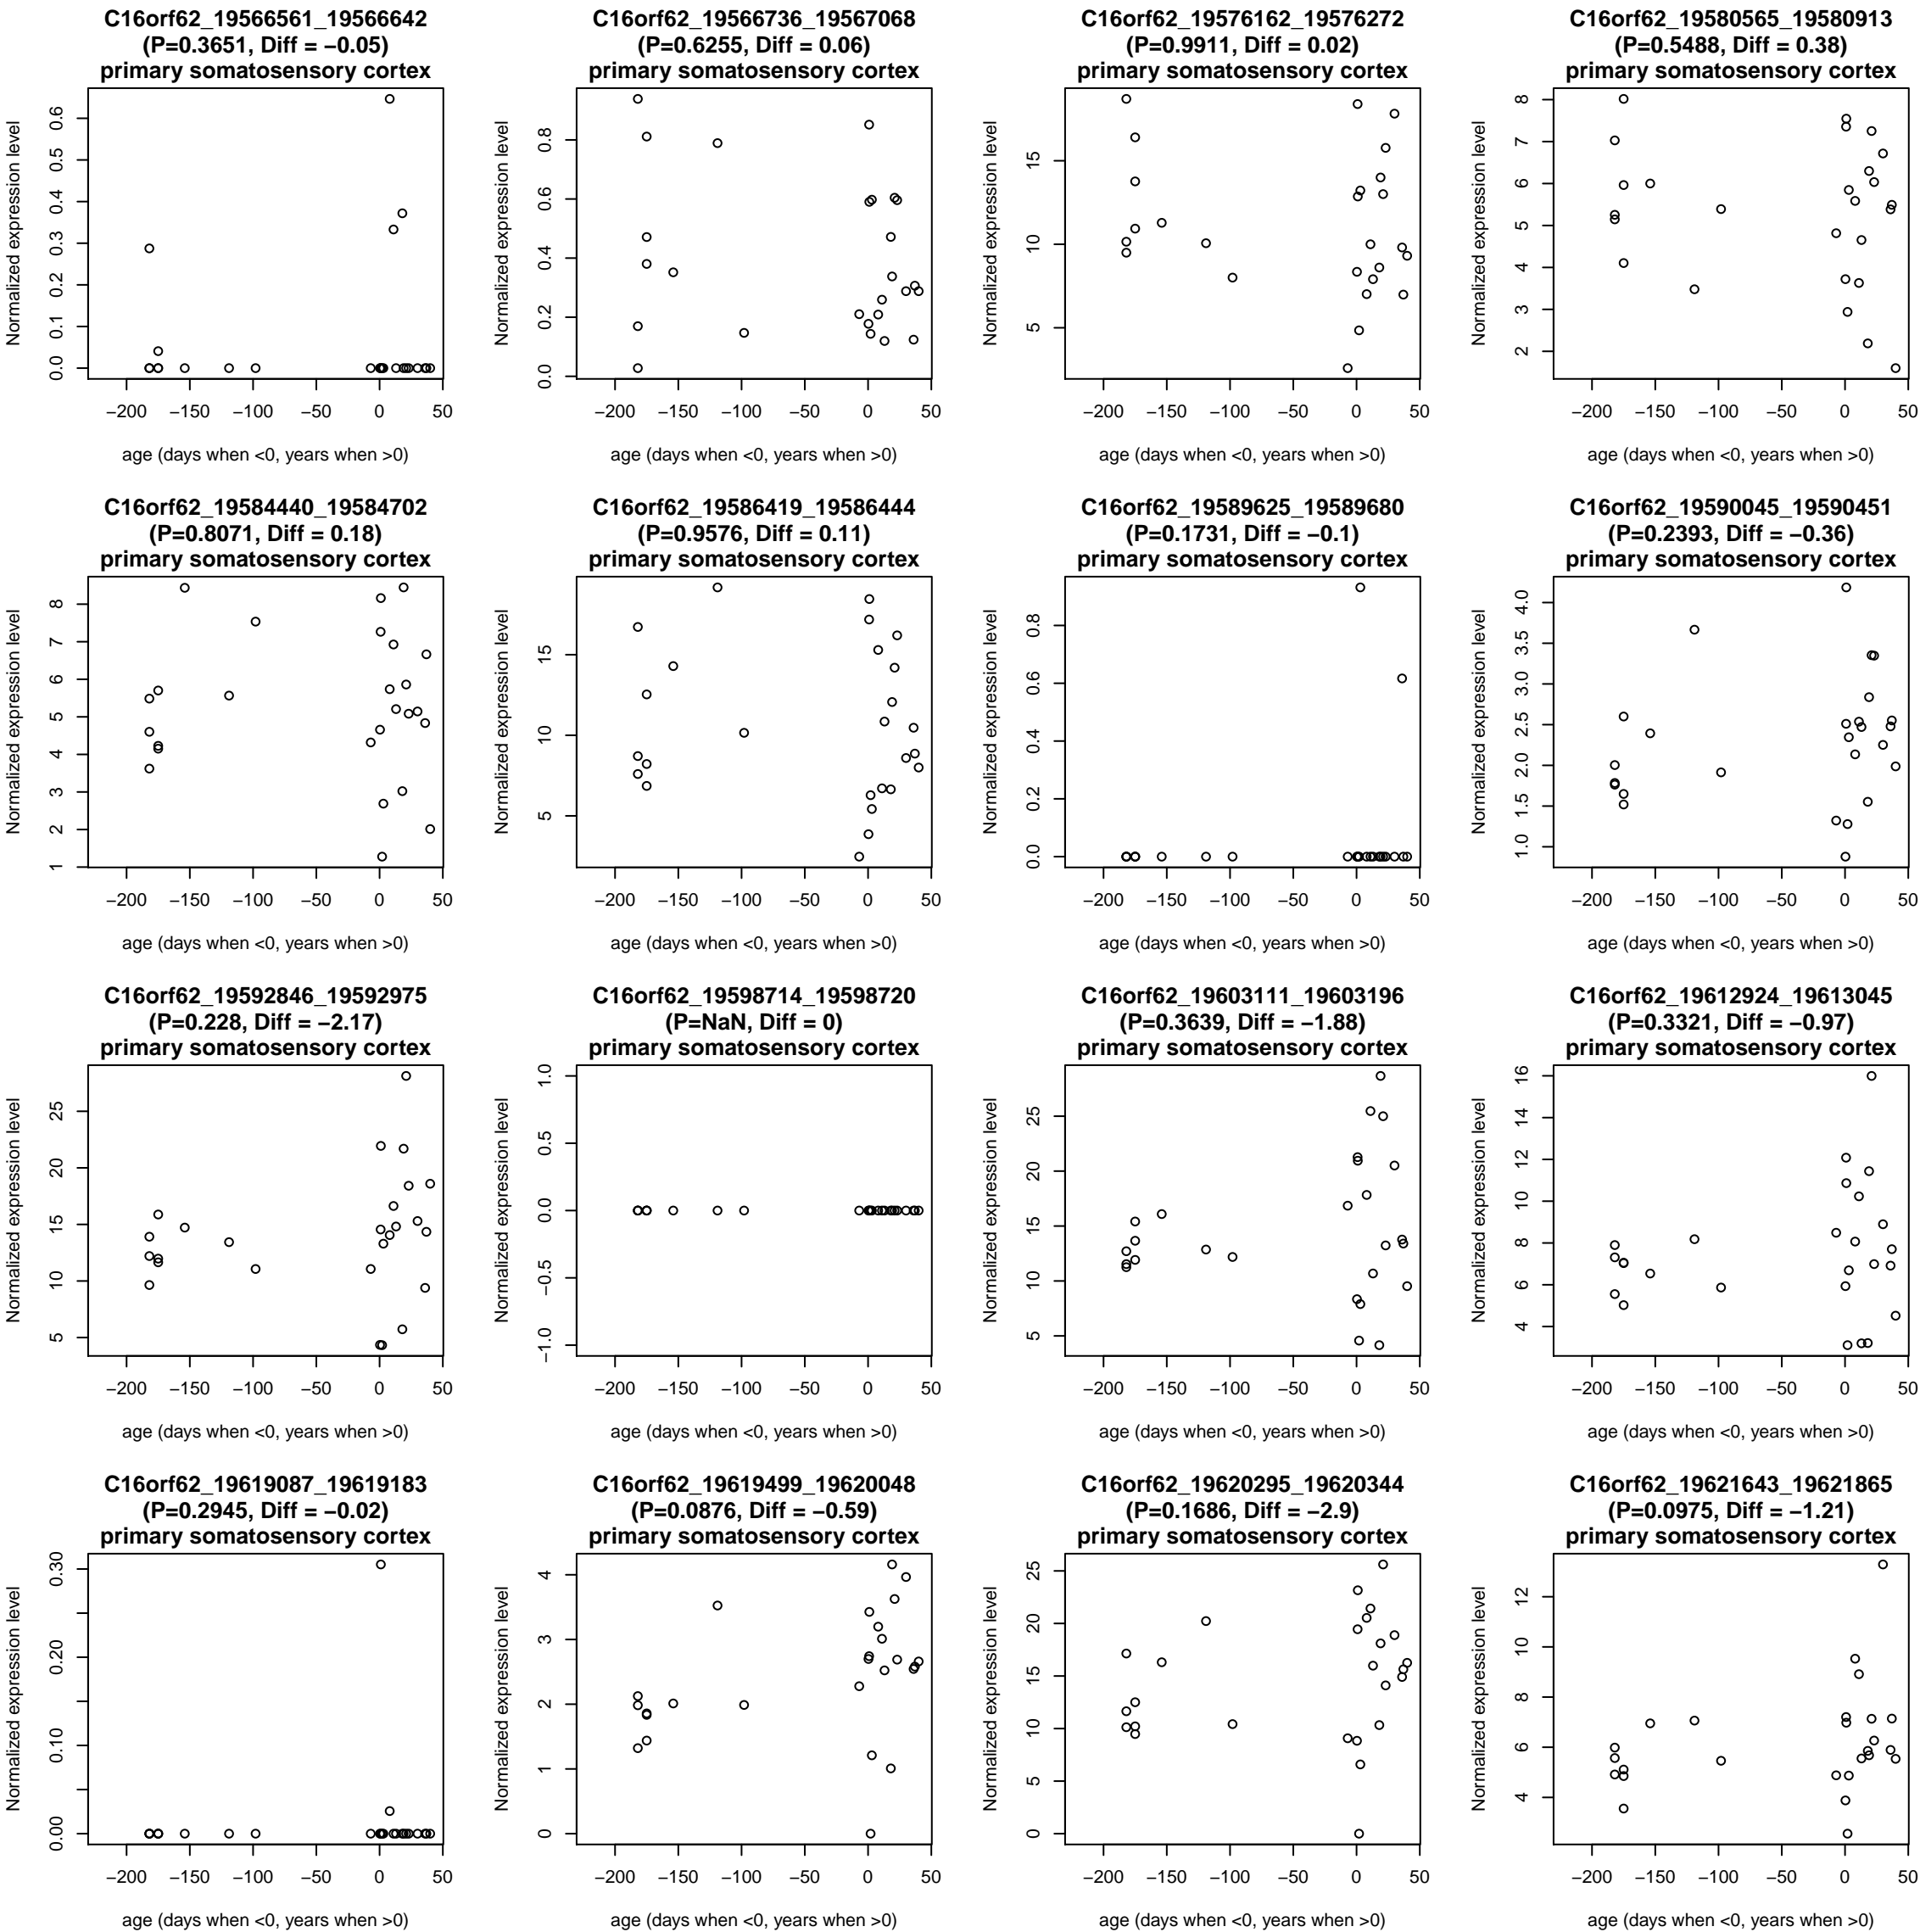

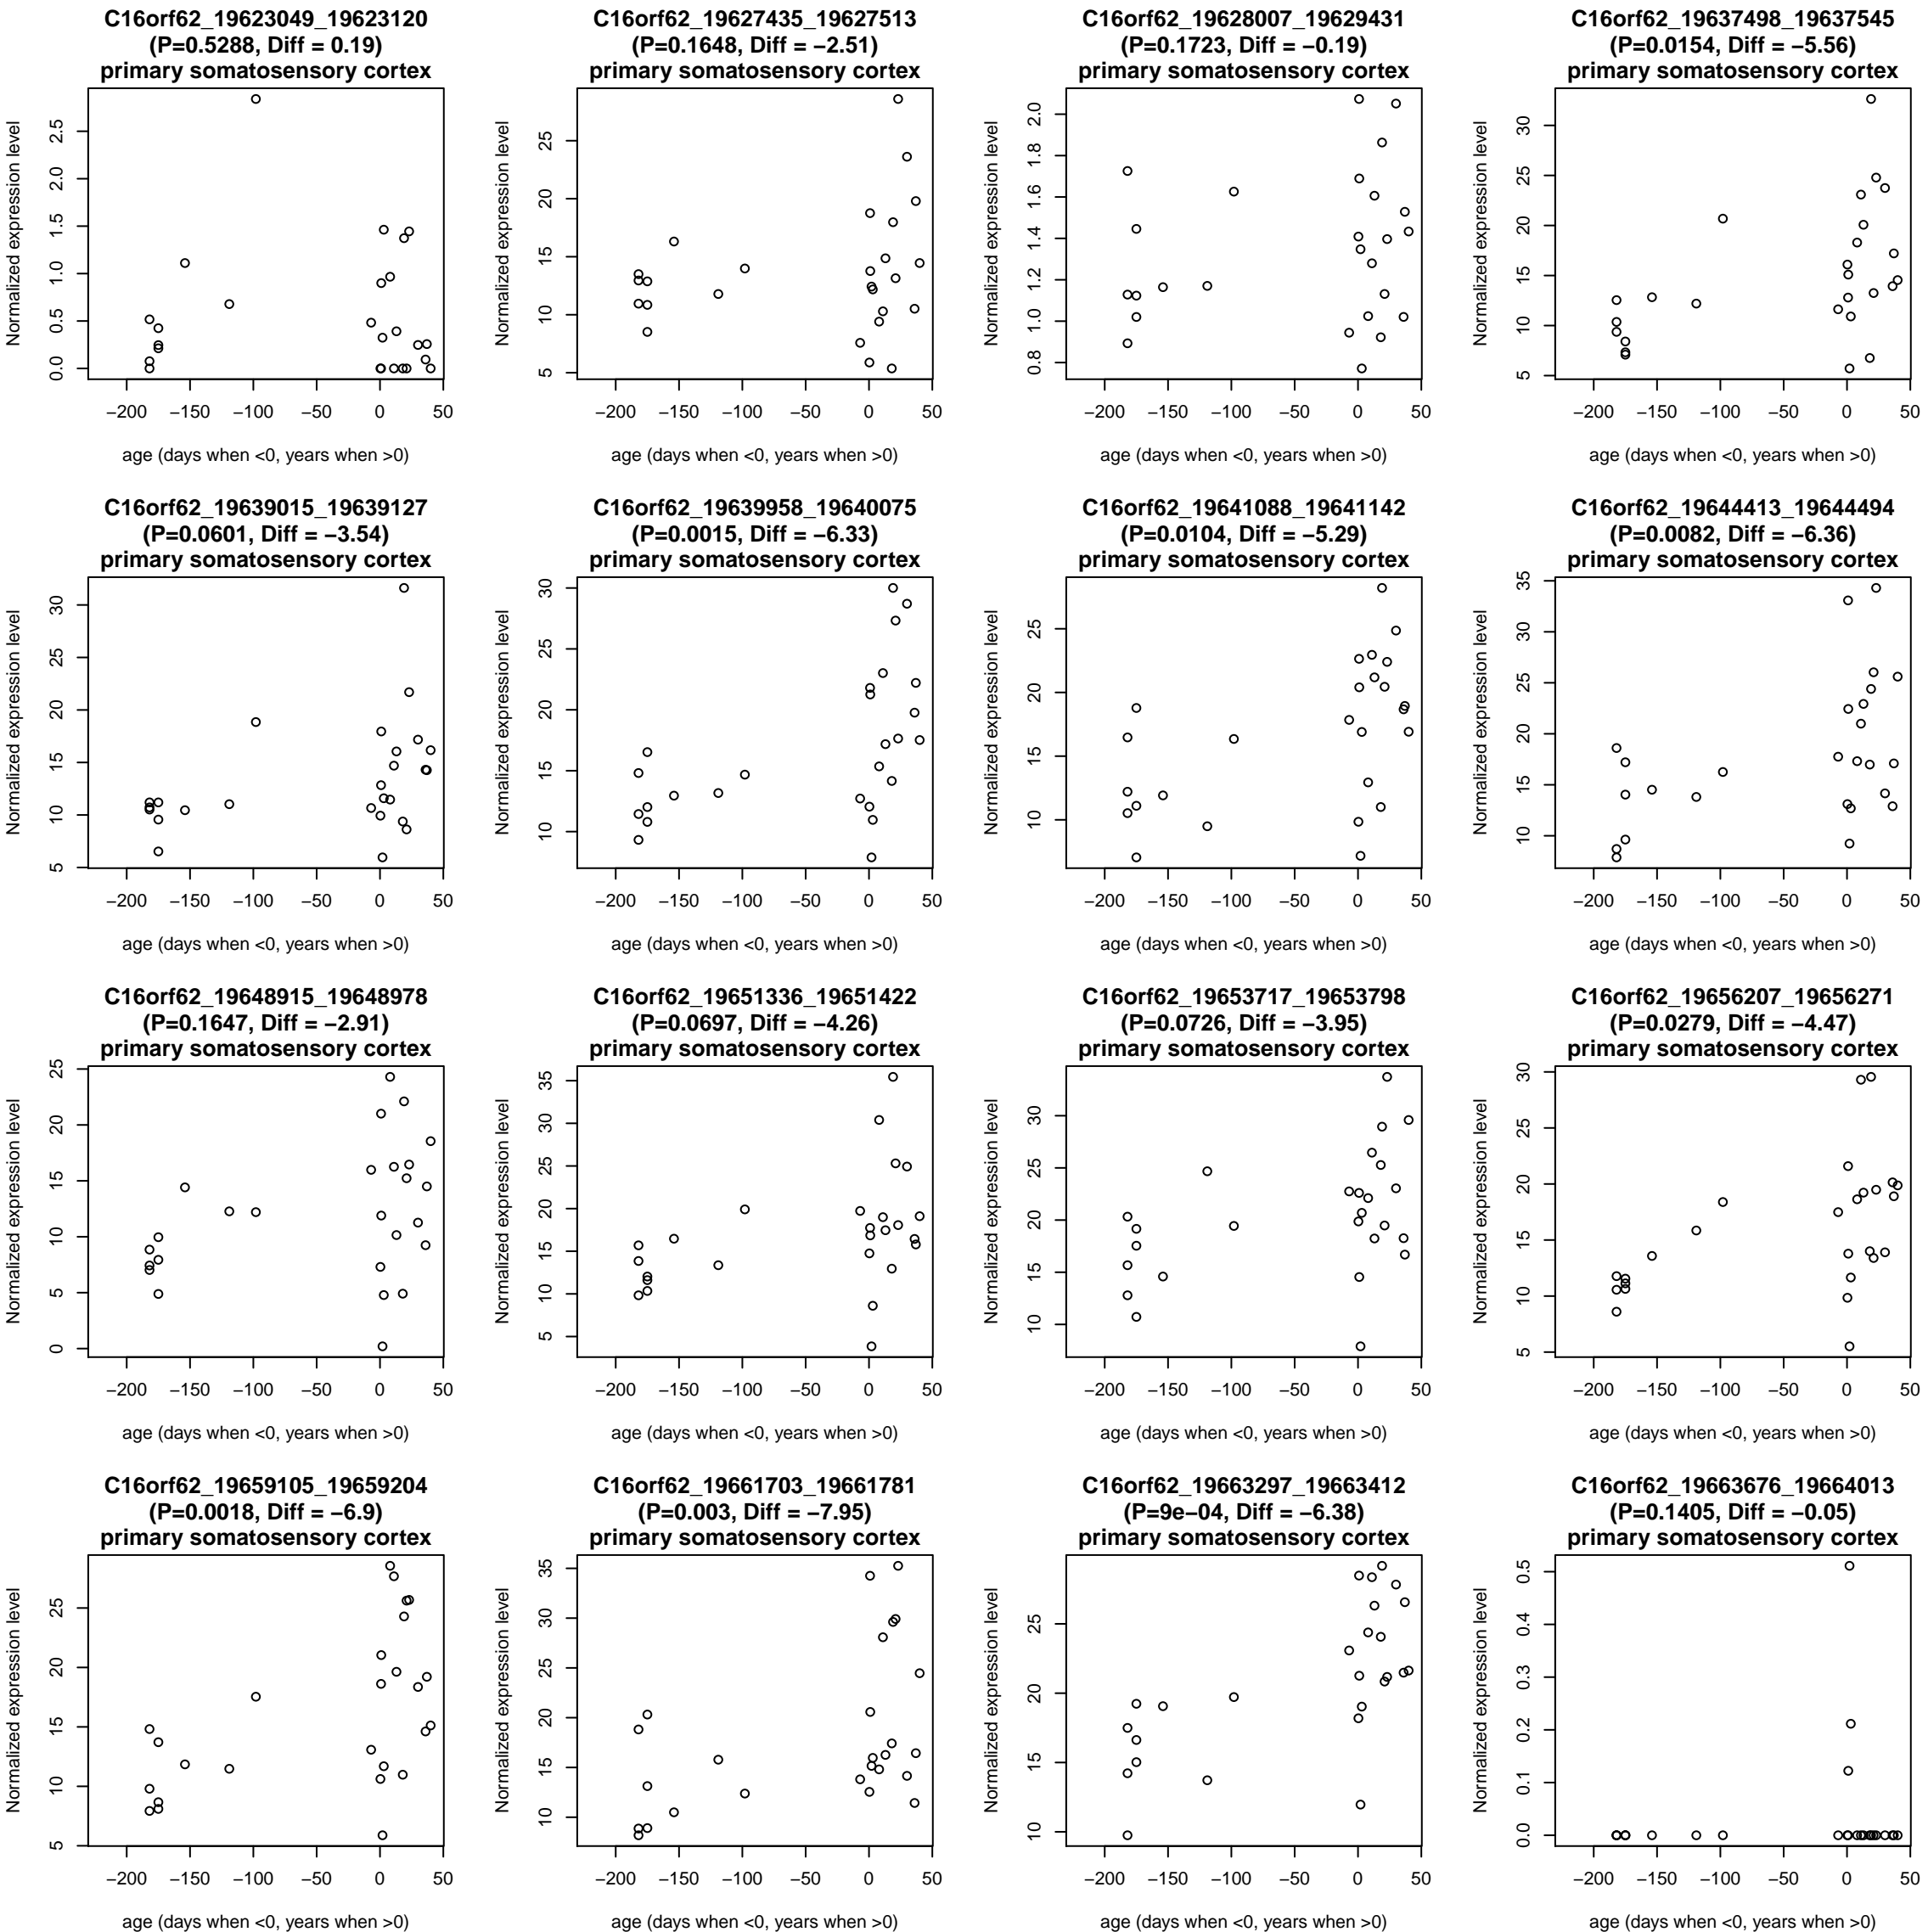

**C16orf62\_19680481\_19680621**  
(P=0.003, Diff = -6.71)  
primary somatosensory cortex

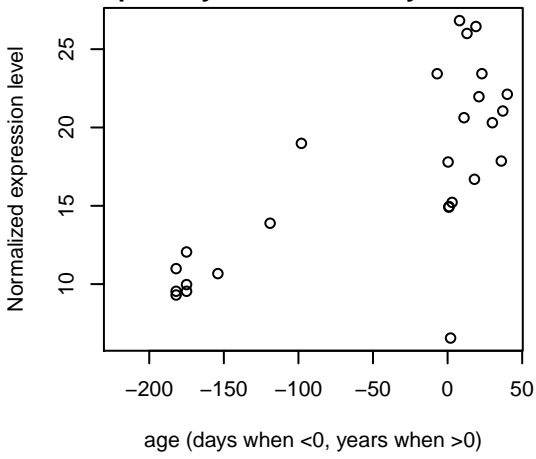

**C16orf62\_19693546\_19693712**  
(P=0, Diff = -11.19)  
primary somatosensory cortex

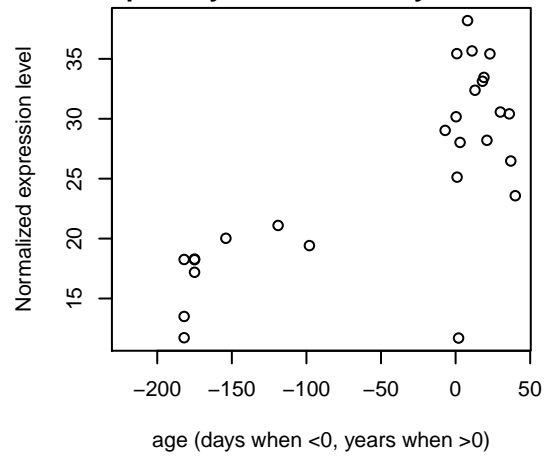

**C16orf62\_19702674\_19702793**  
(P=0.003, Diff = -8.99)  
primary somatosensory cortex

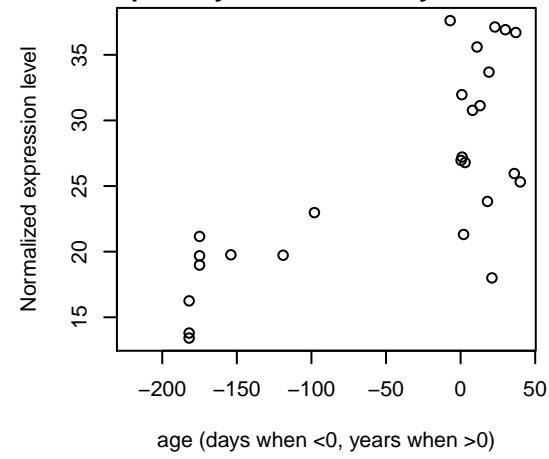

**C16orf62\_19710823\_19710970**  
(P=1e-04, Diff = -11.2)  
primary somatosensory cortex

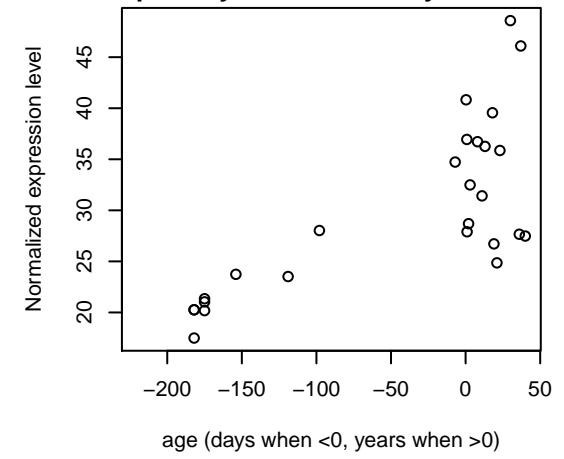

**C16orf62\_19711699\_19712448**  
(P=5e-04, Diff = -4.54)  
primary somatosensory cortex

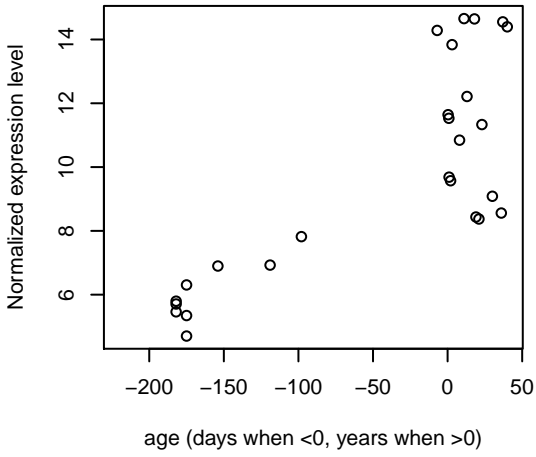

**C16orf62\_19716437\_19716880**  
(P=0.0012, Diff = 1.67)  
primary somatosensory cortex

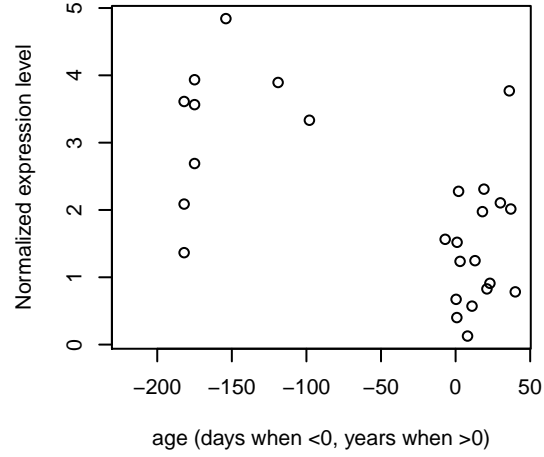

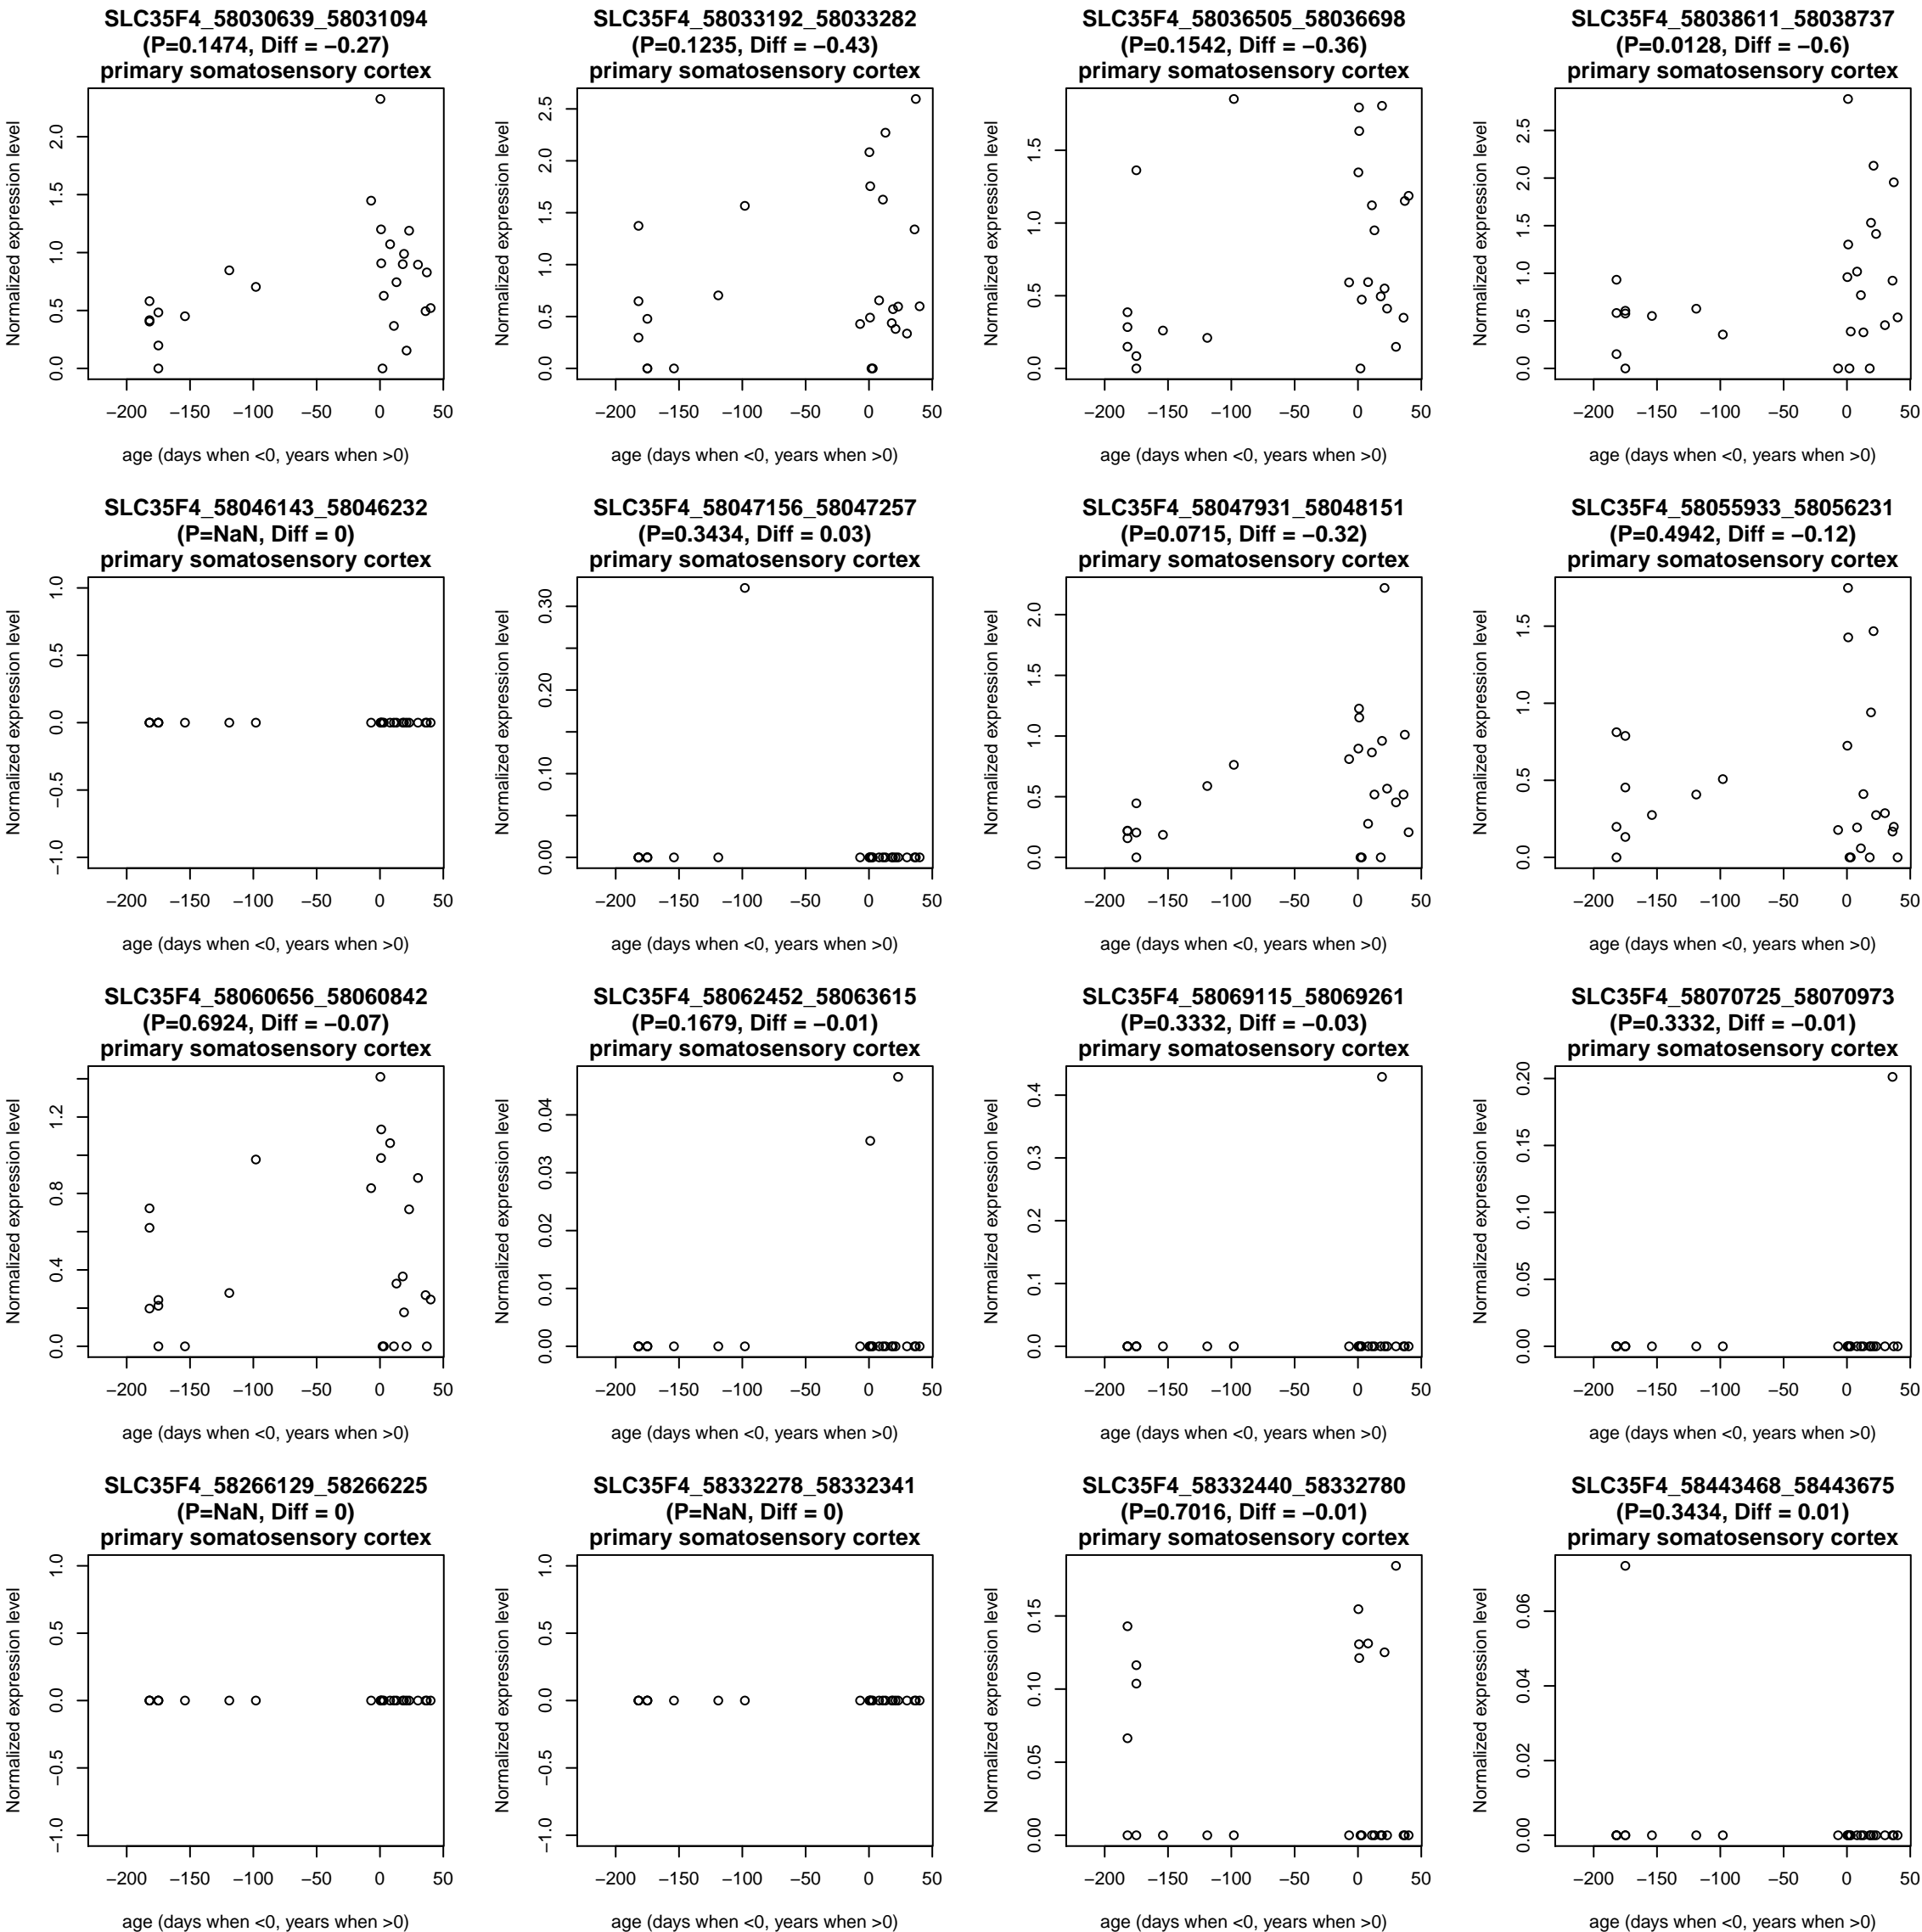

SLC35F4\_58448630\_58448912  
(P=0.3332, Diff = -0.01)  
primary somatosensory cortex

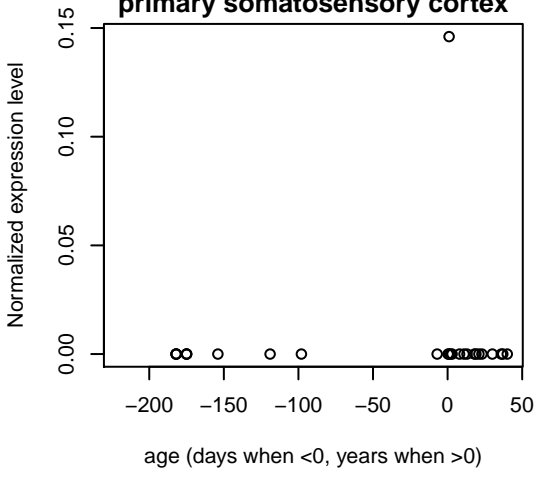



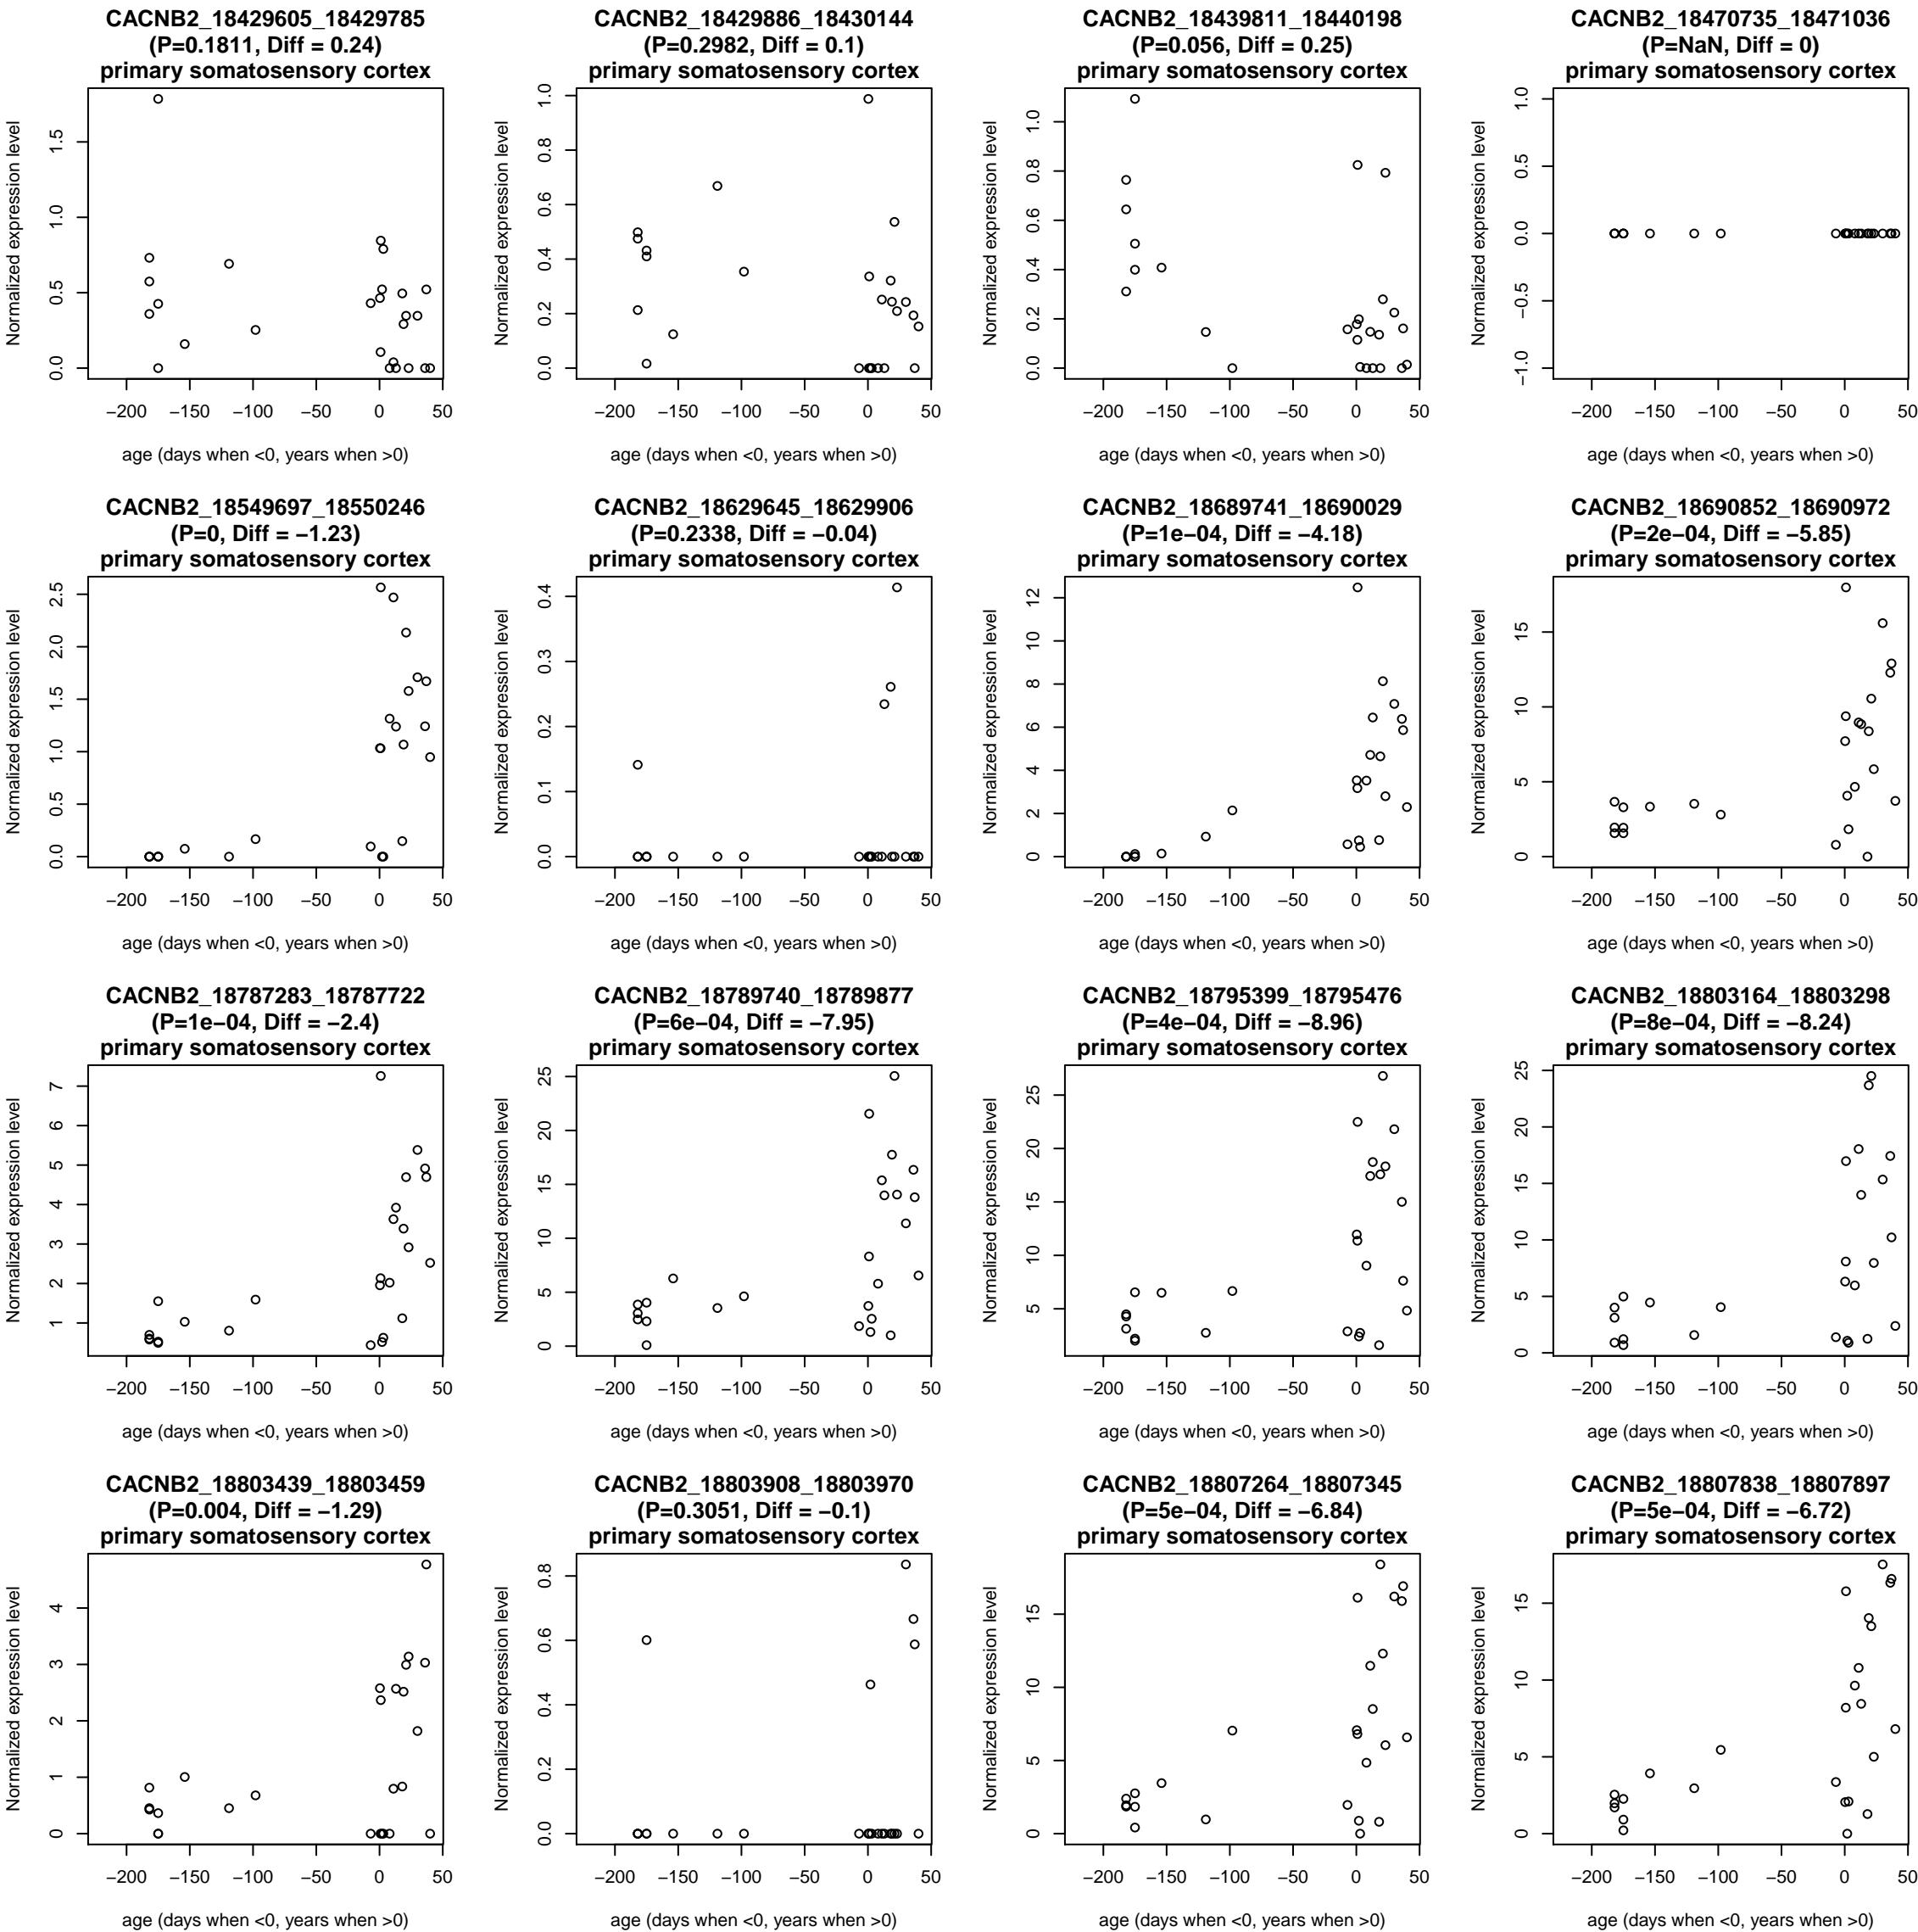

**CACNB2\_18816516\_18816626**  
(P=1e-04, Diff = -9.05)  
primary somatosensory cortex

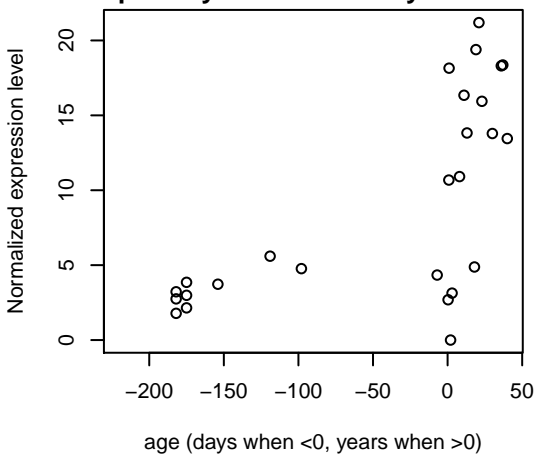

**CACNB2\_18823004\_18823156**  
(P=1e-04, Diff = -8.33)  
primary somatosensory cortex

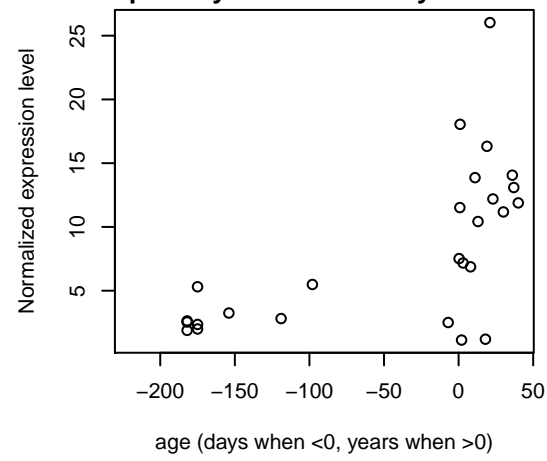

**CACNB2\_18825029\_18825125**  
(P=0, Diff = -10.37)  
primary somatosensory cortex

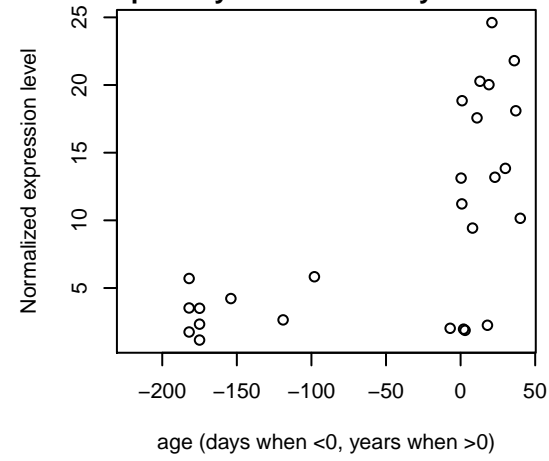

**CACNB2\_18827108\_18827294**  
(P=1e-04, Diff = -12.31)  
primary somatosensory cortex

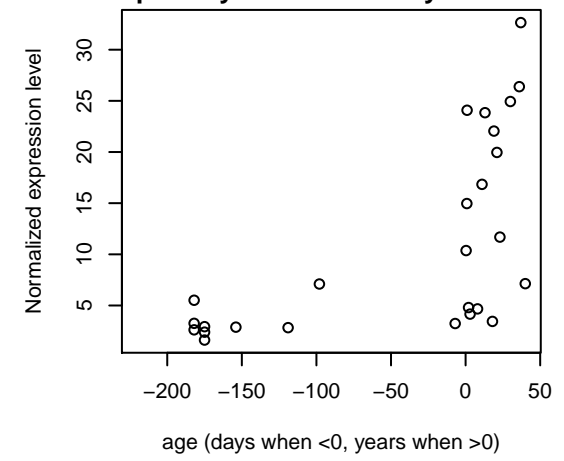

**CACNB2\_18828158\_18830798**  
(P=0, Diff = -8.74)  
primary somatosensory cortex

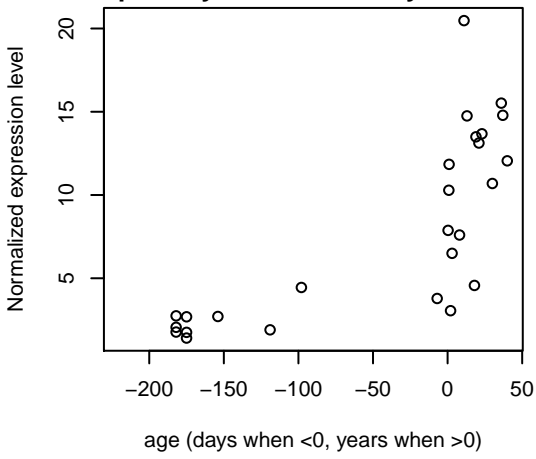

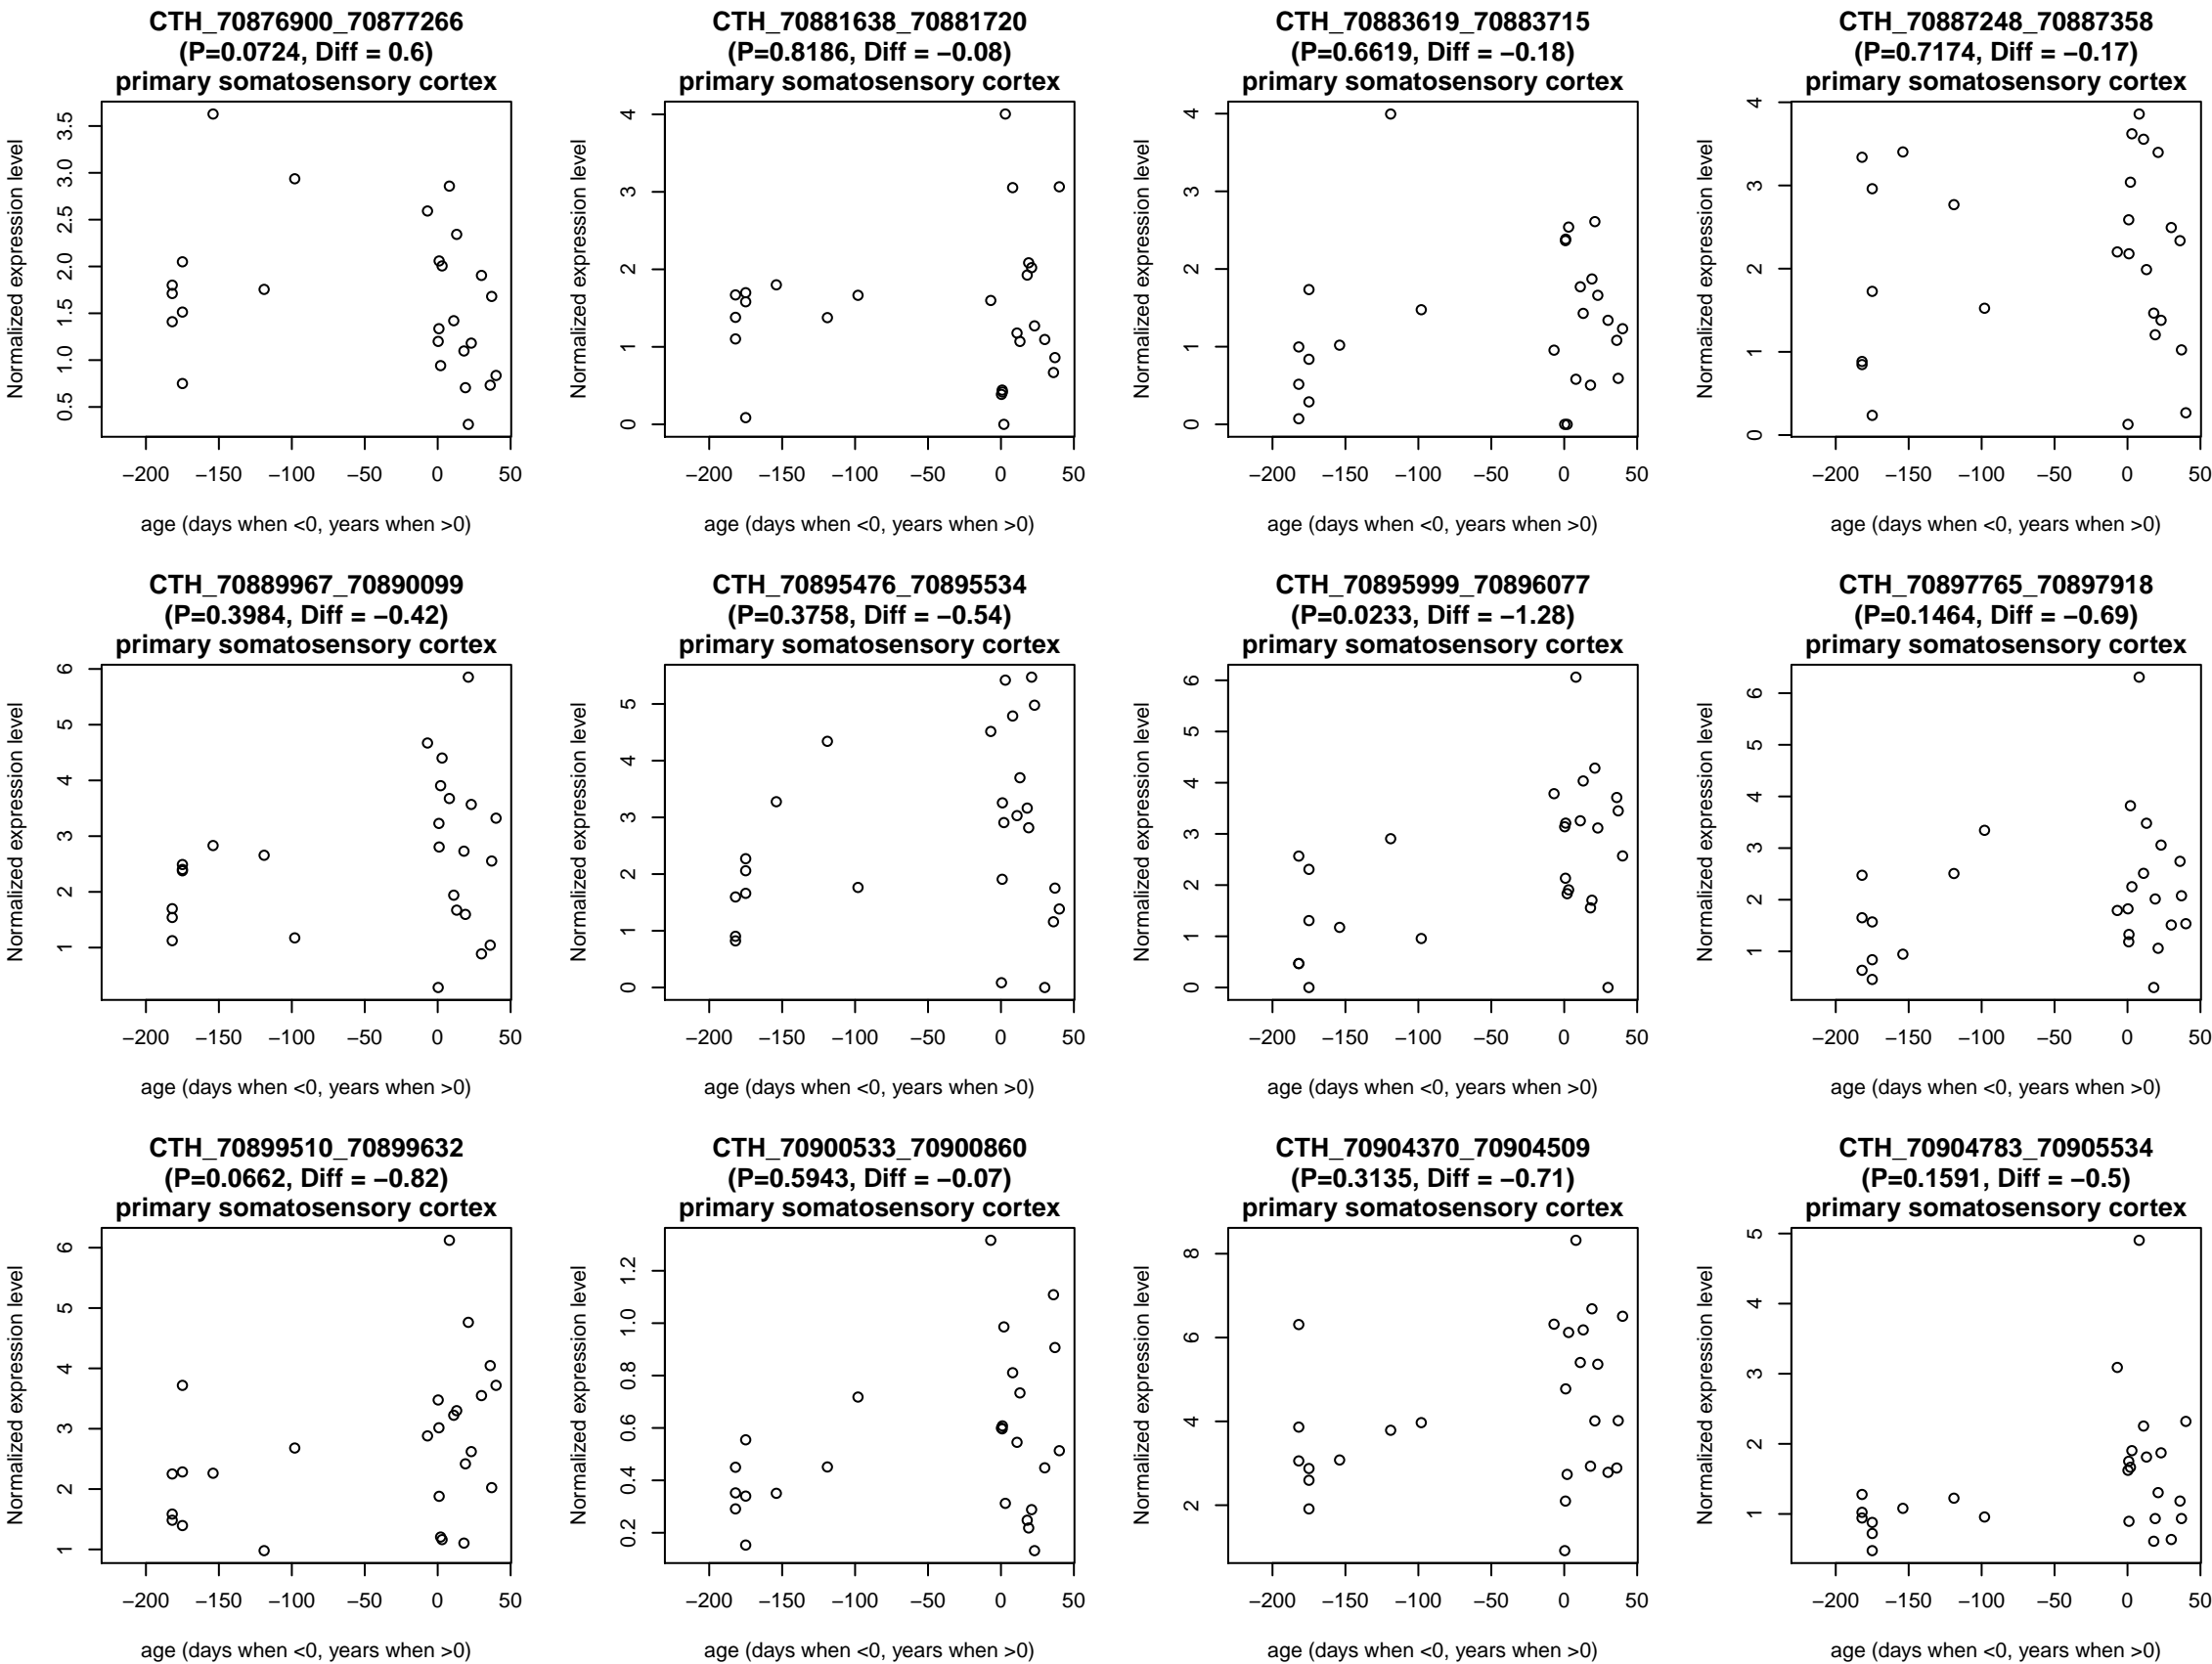

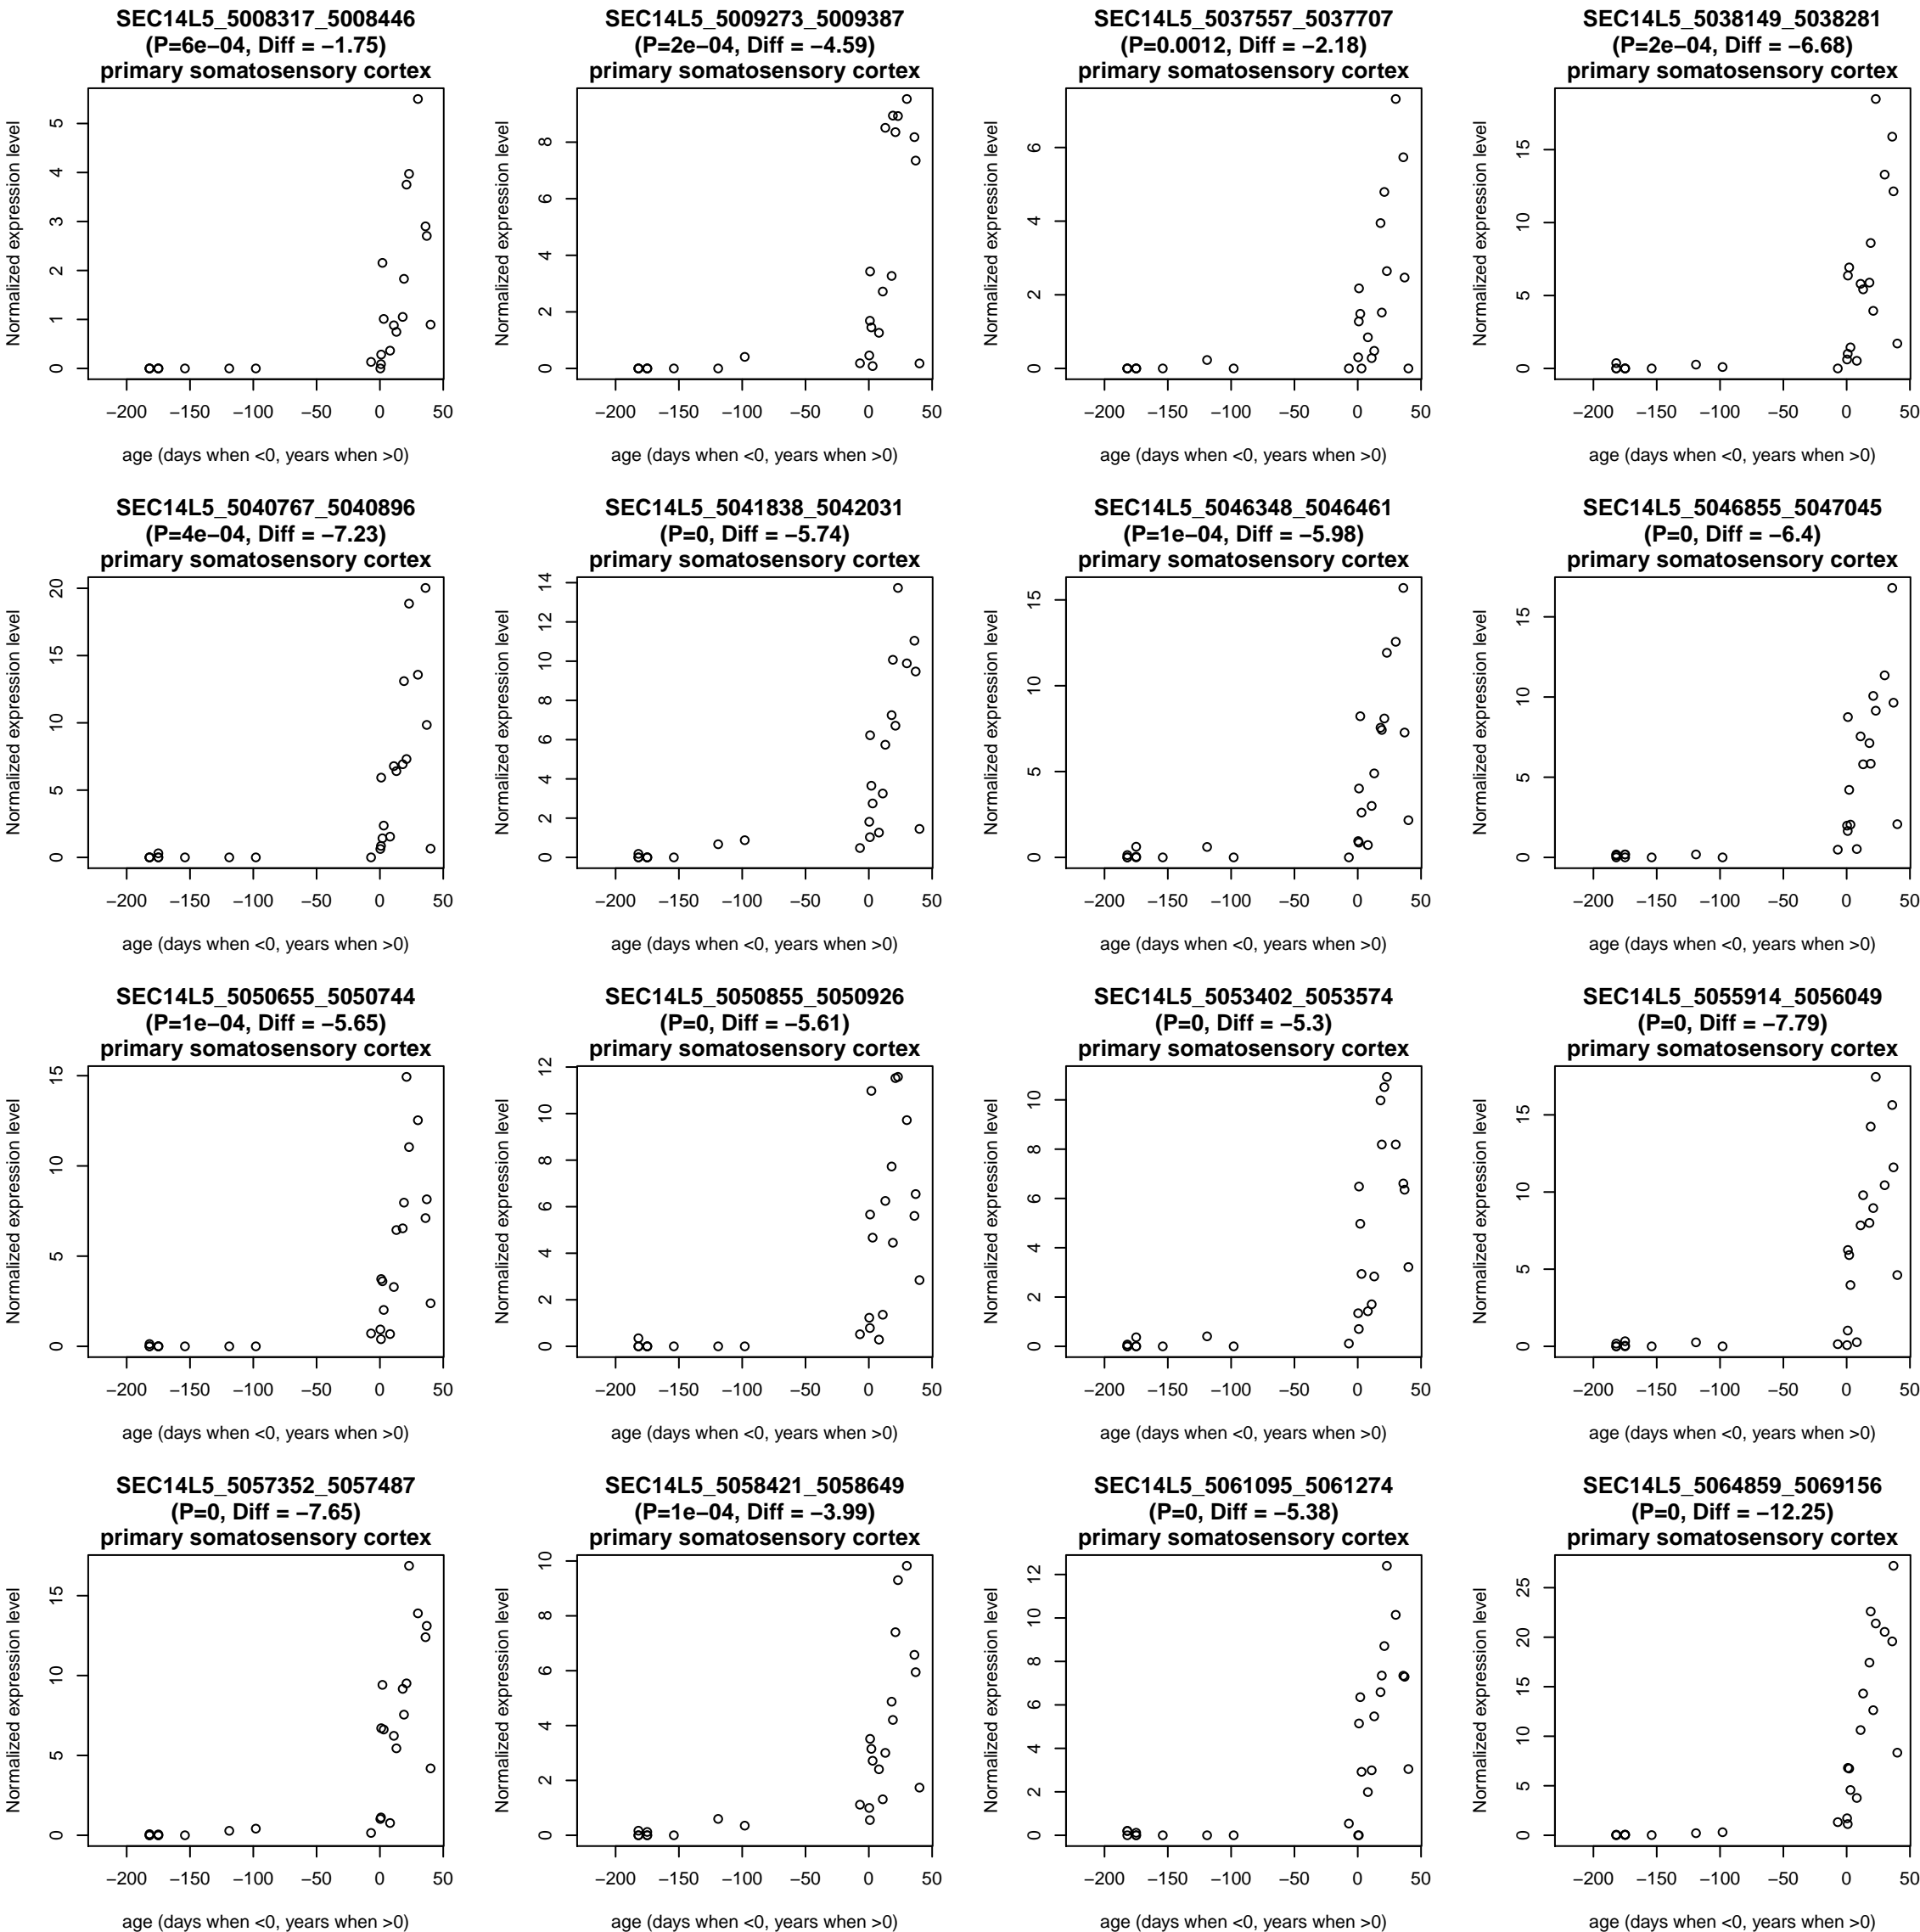

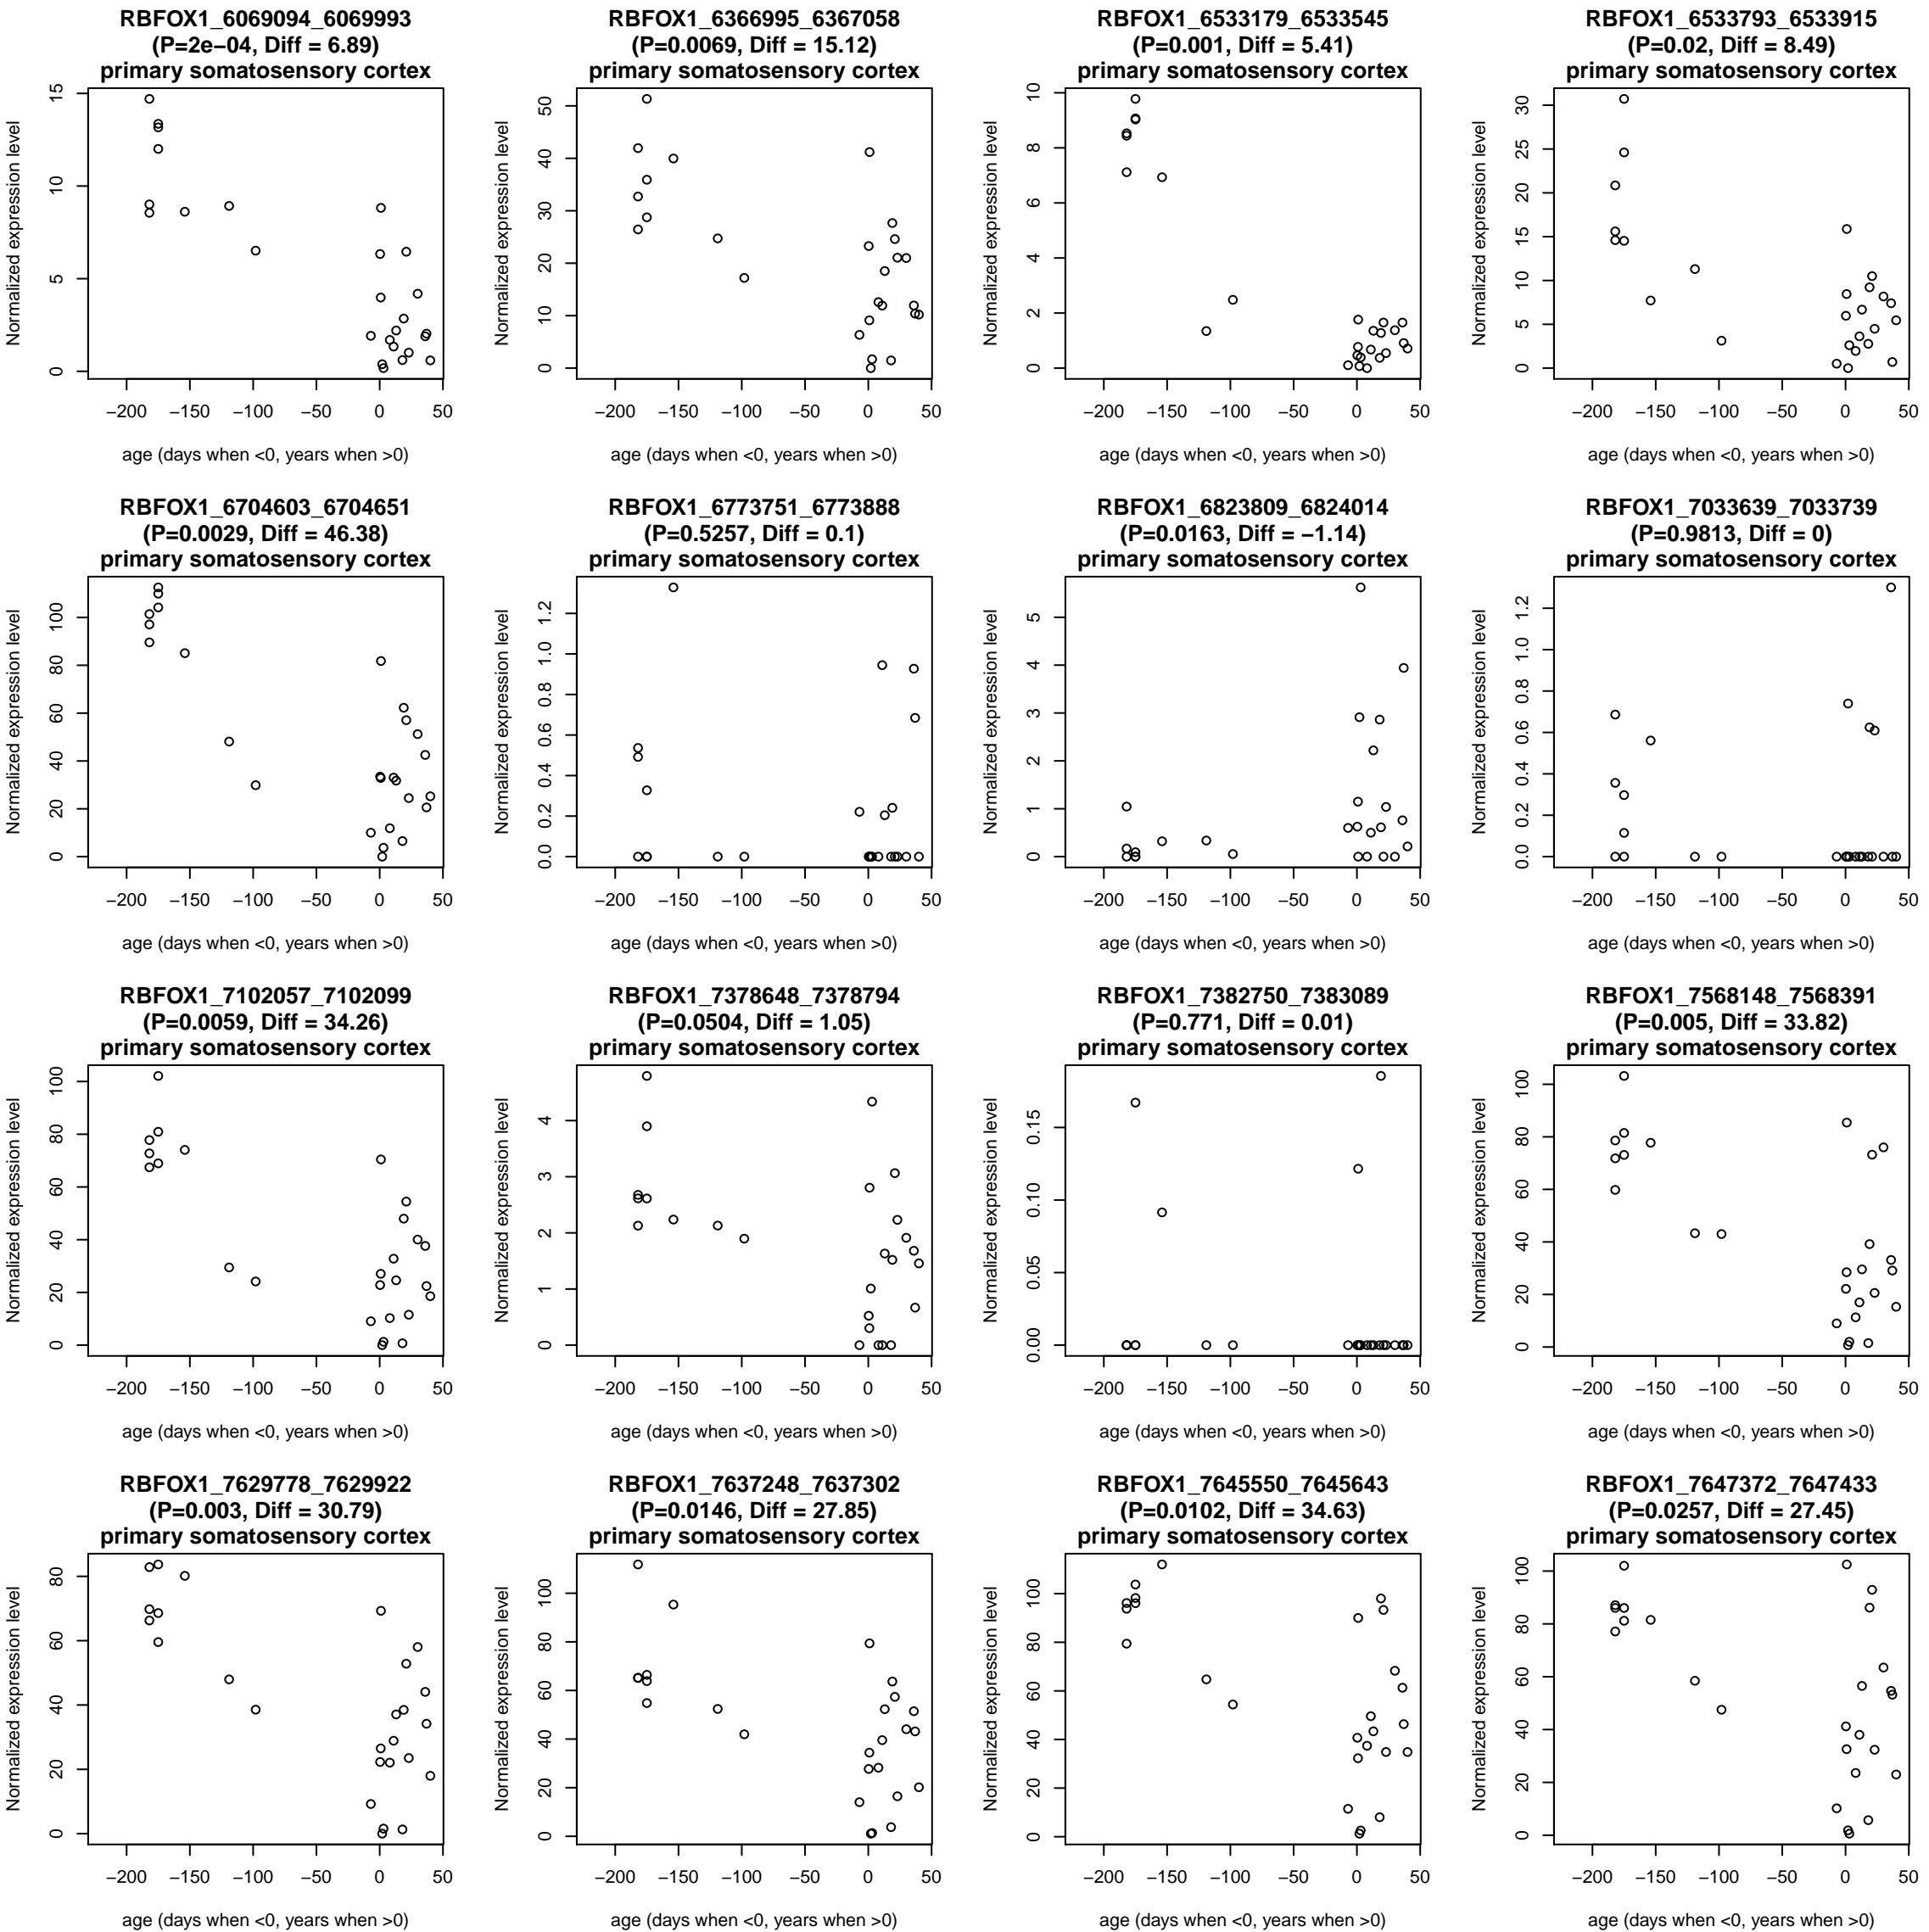

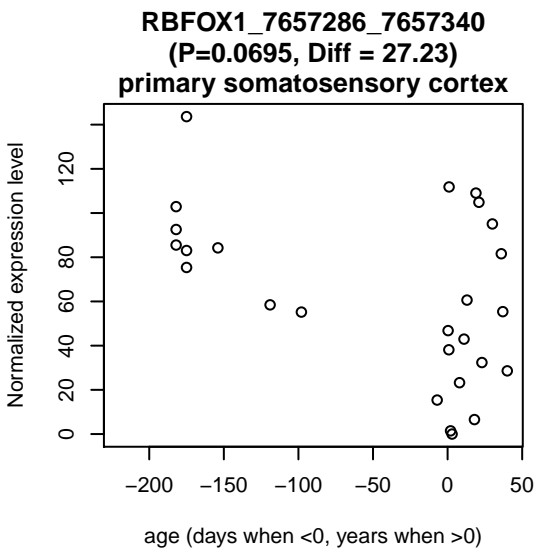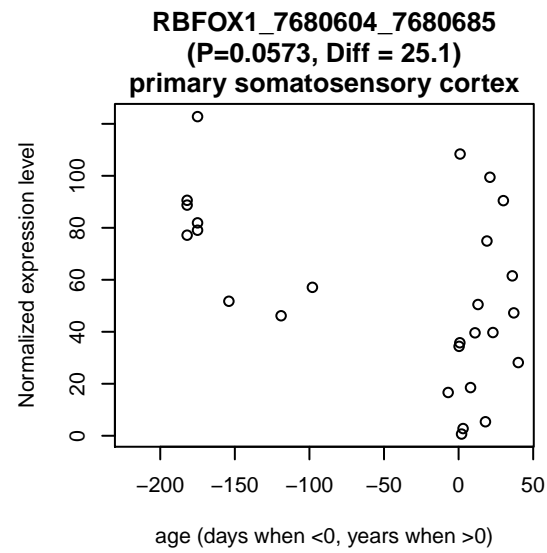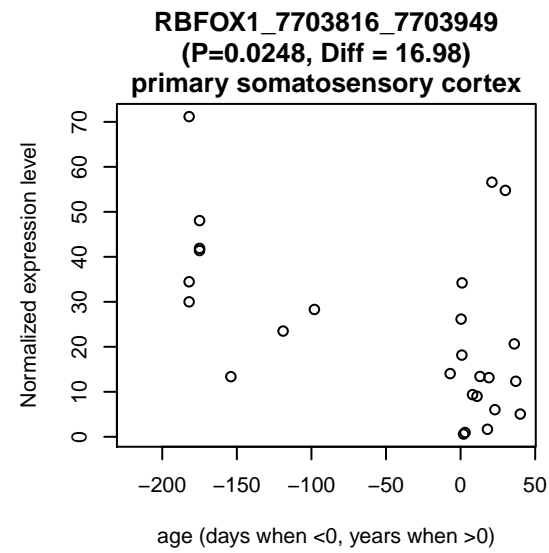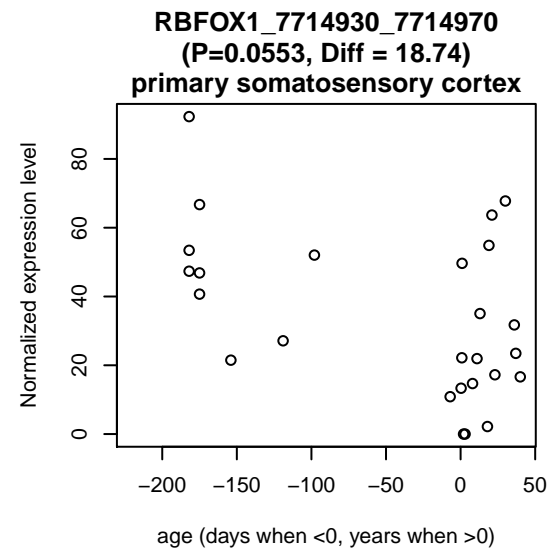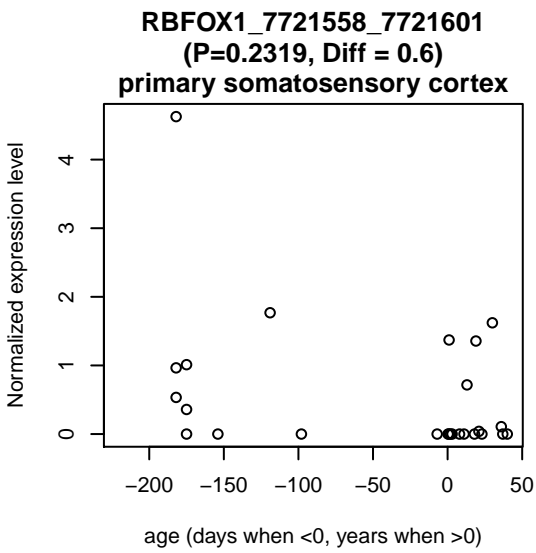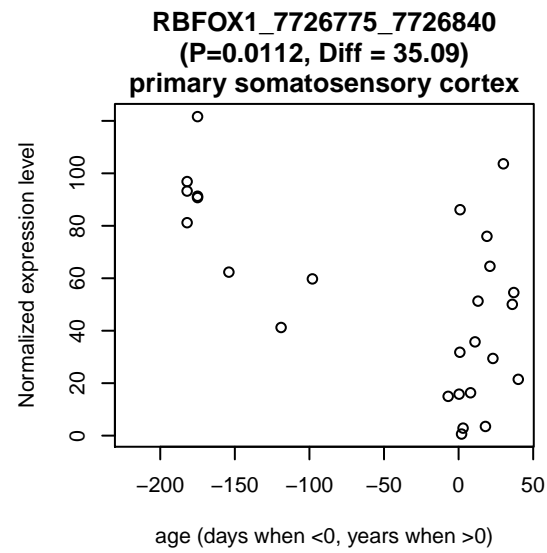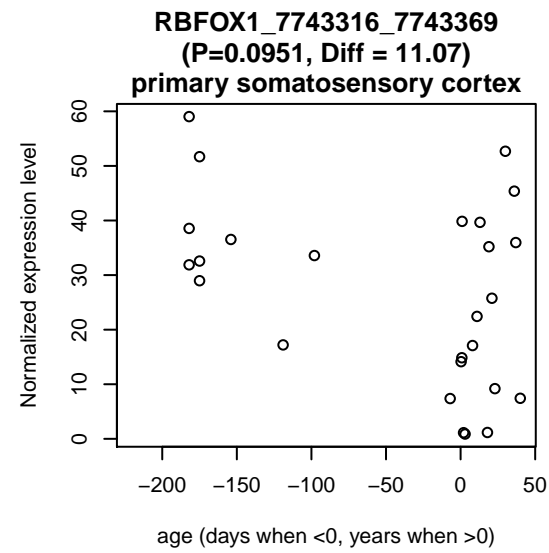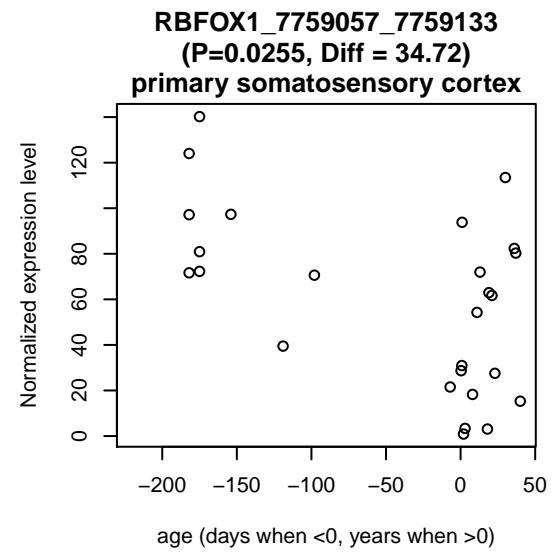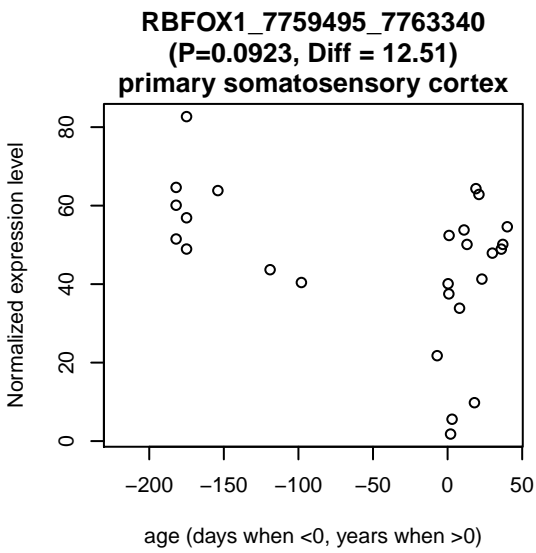

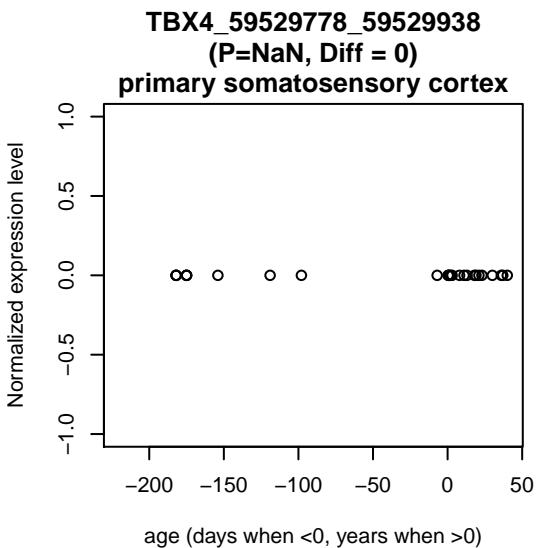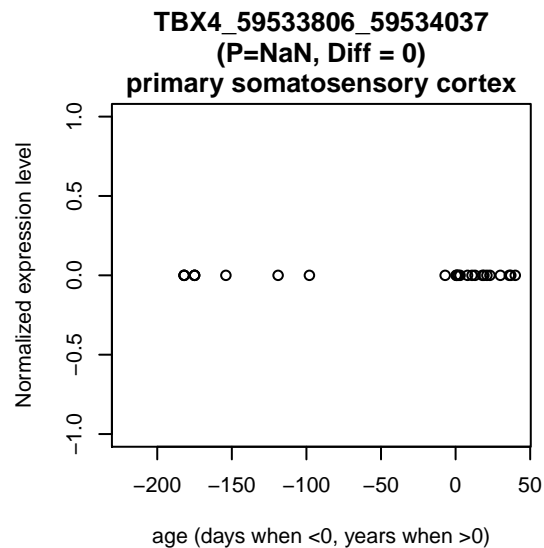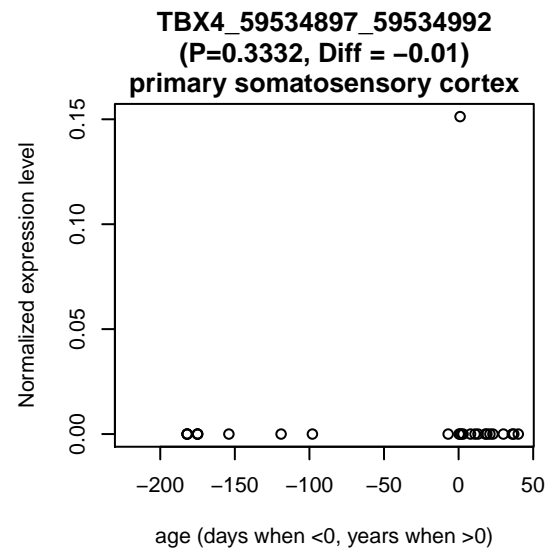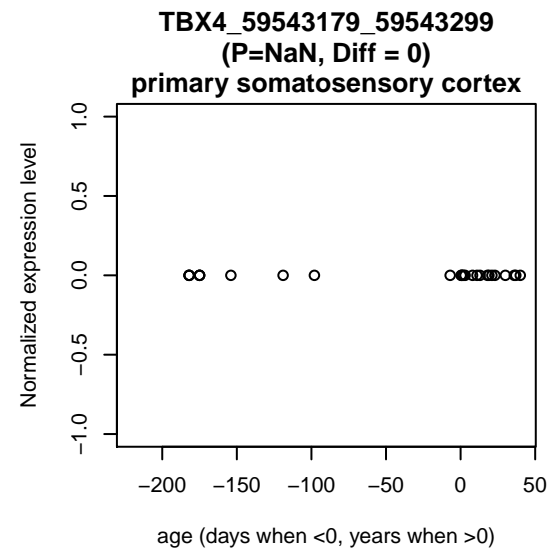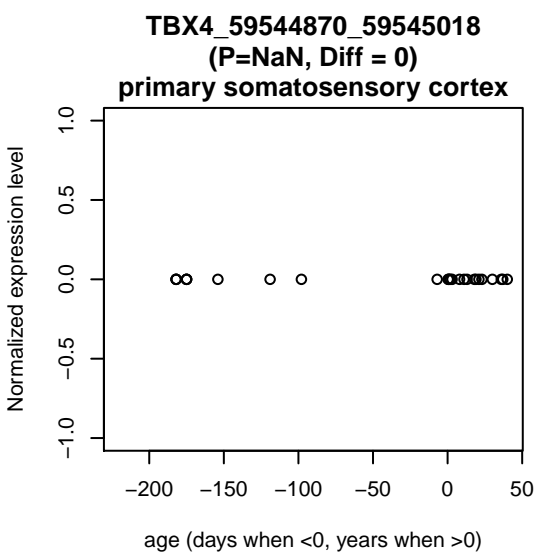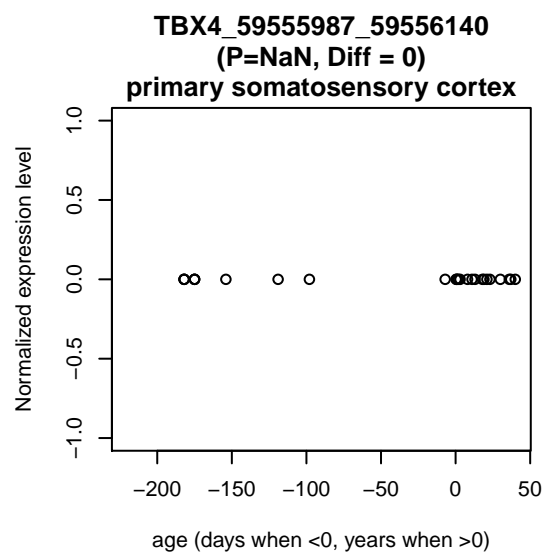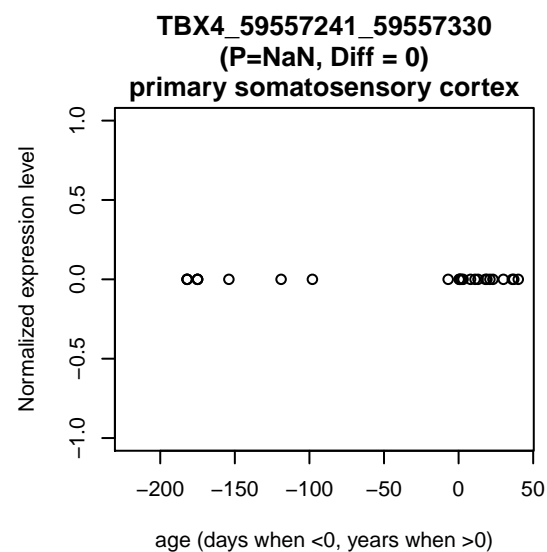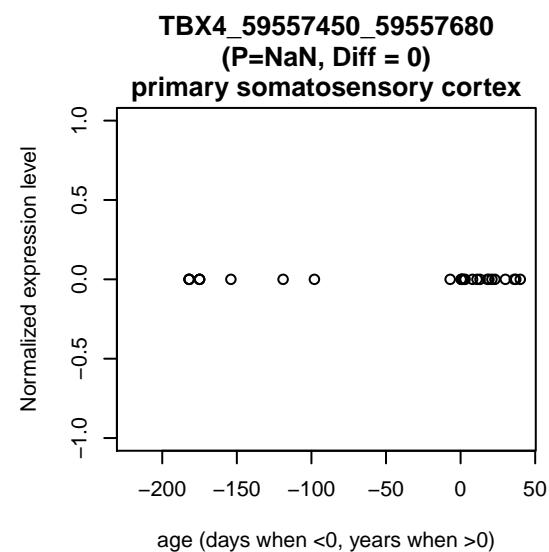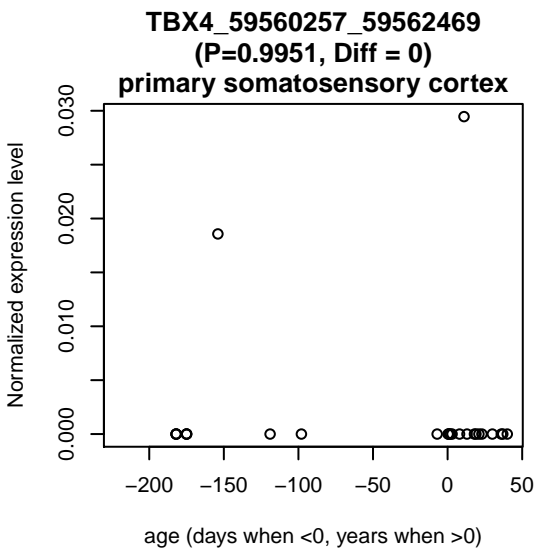

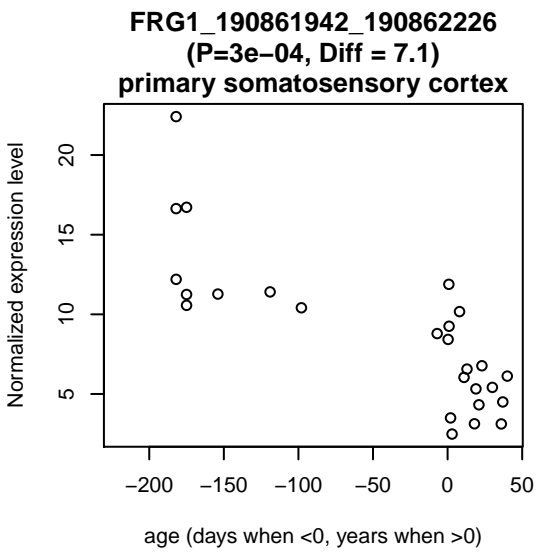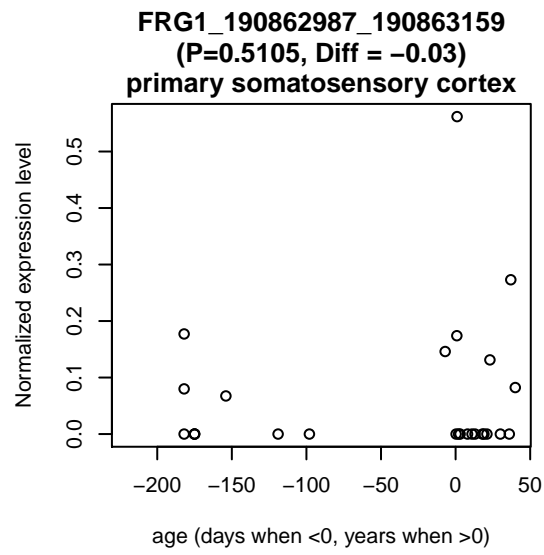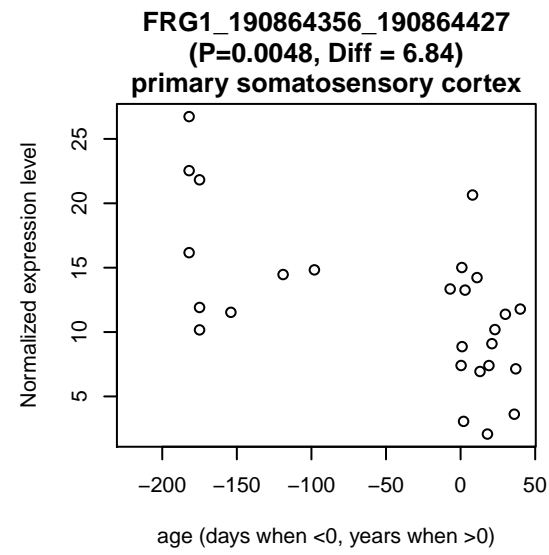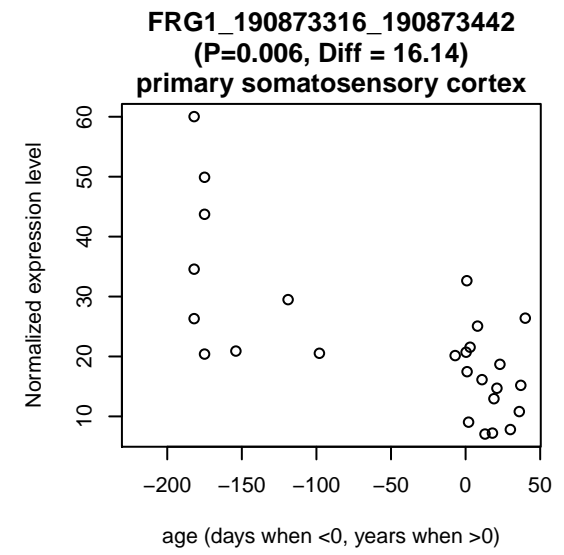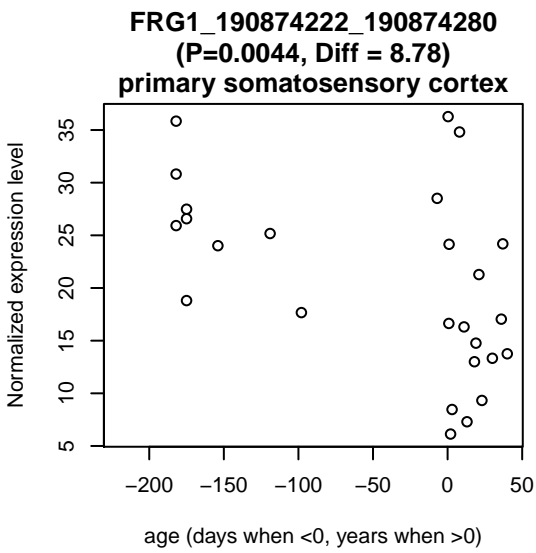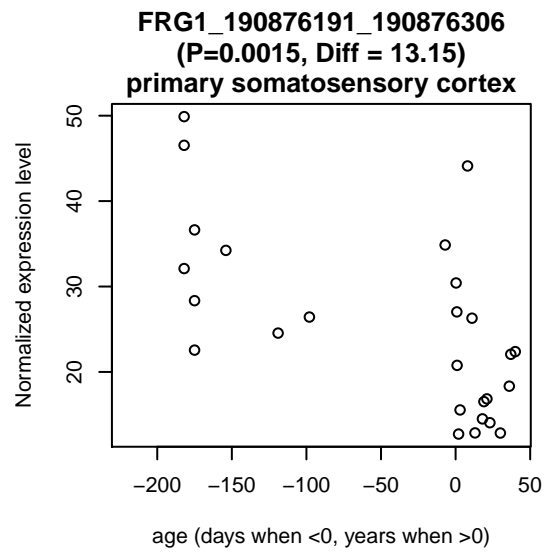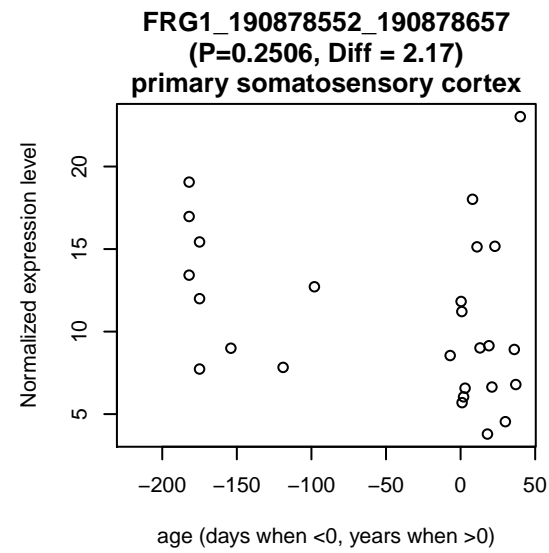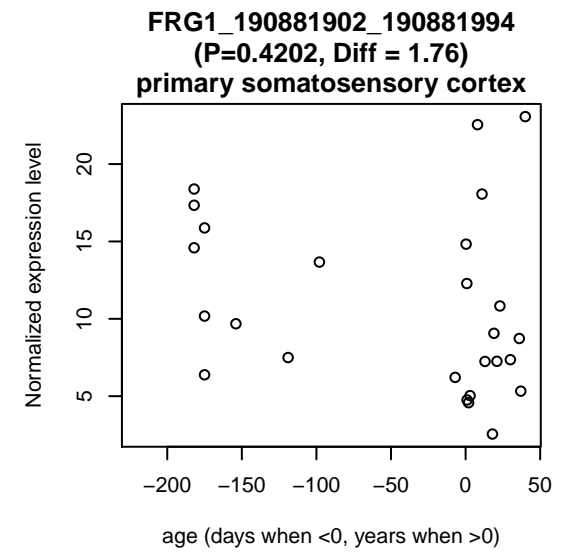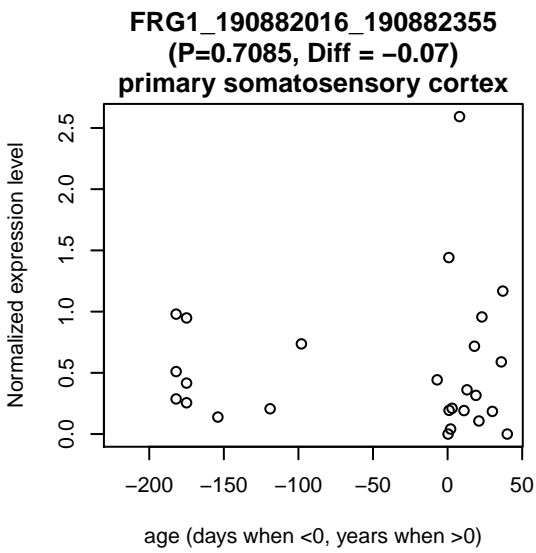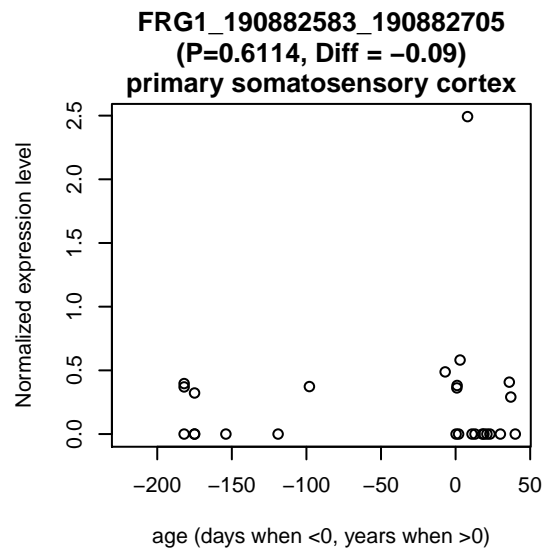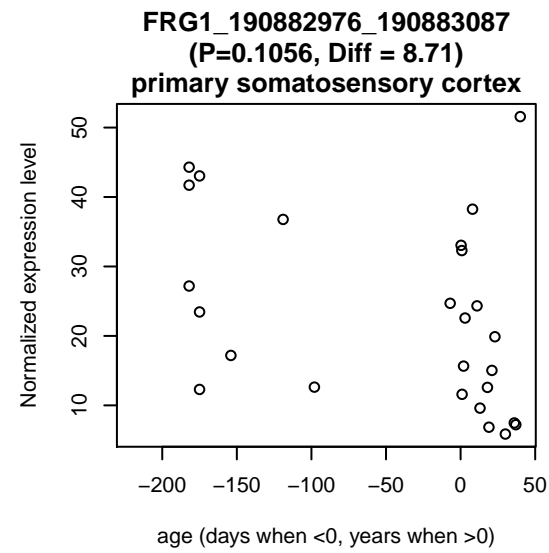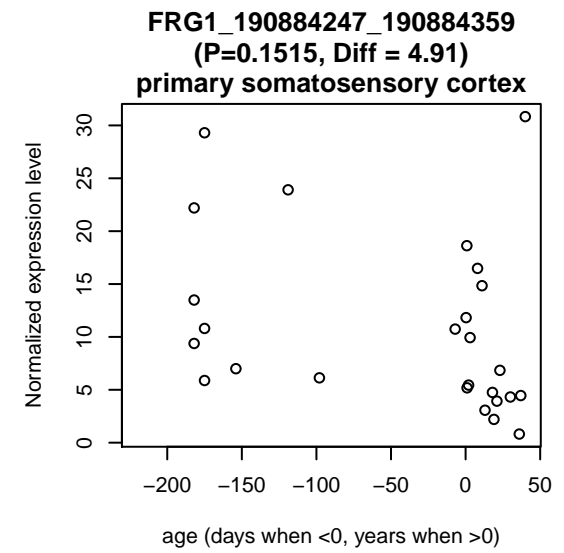



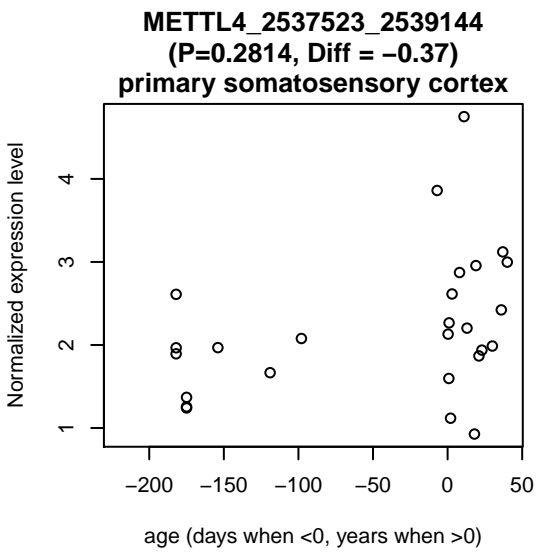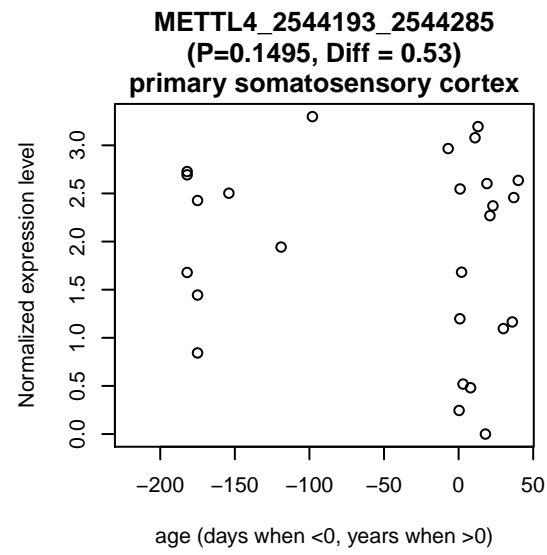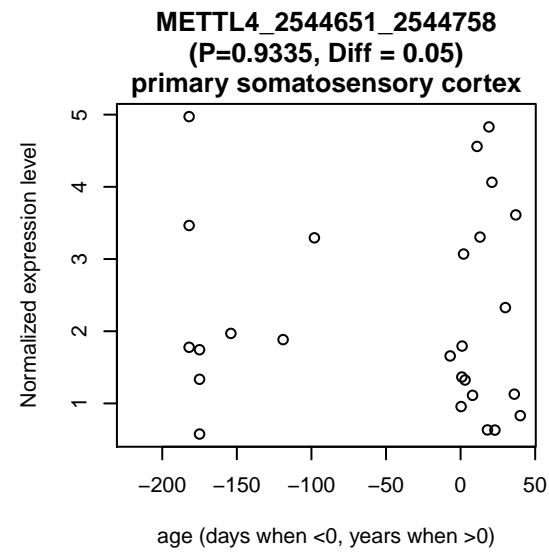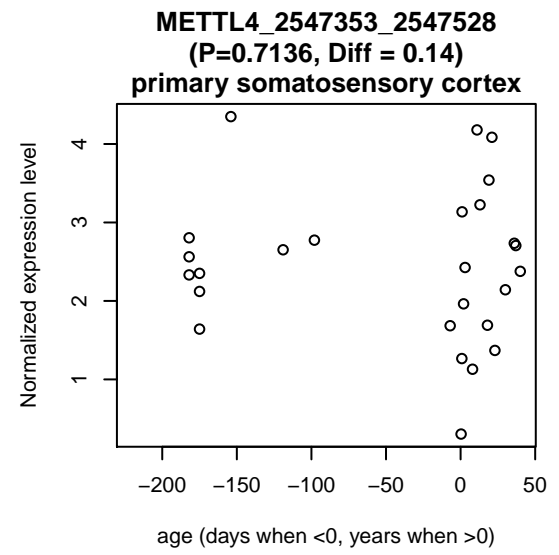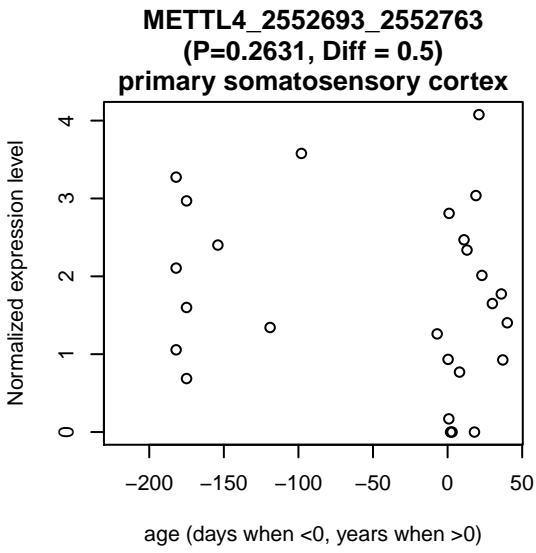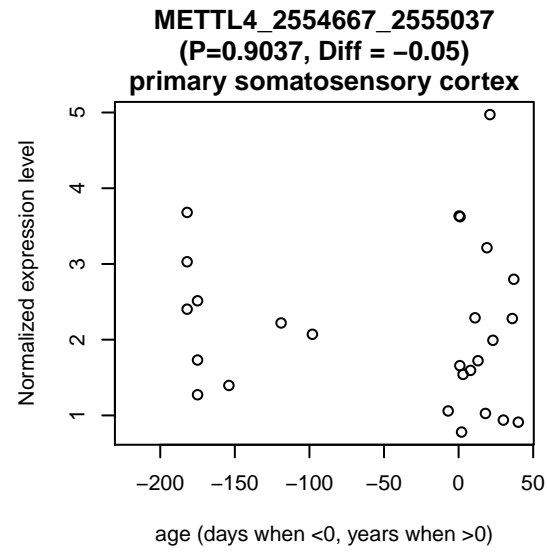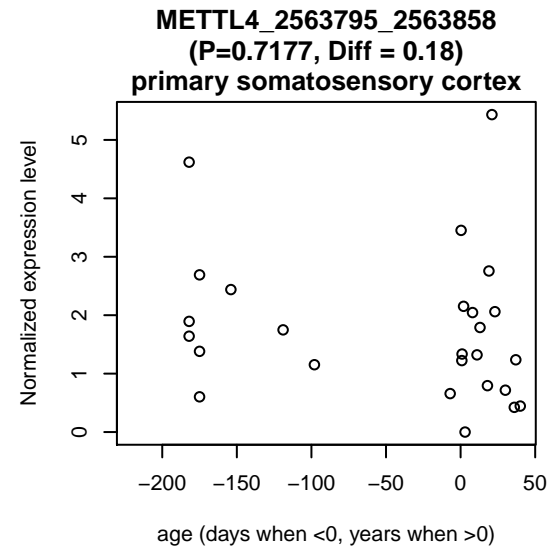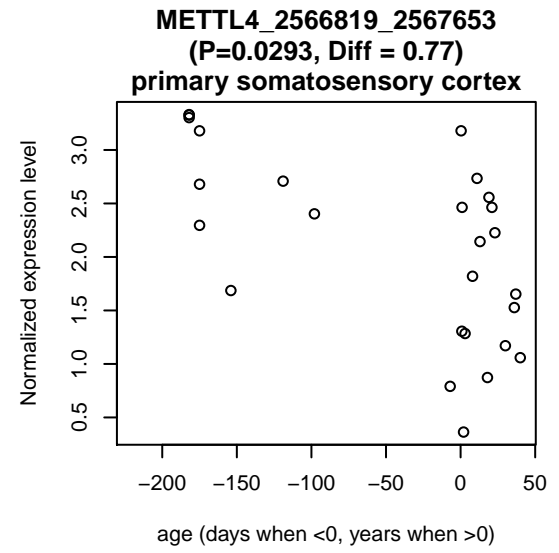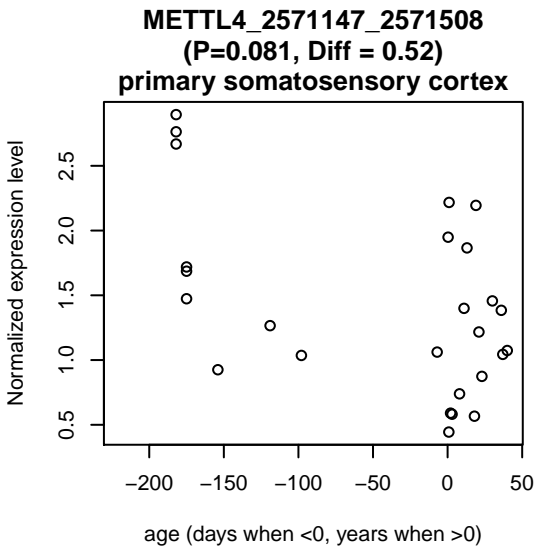

**C7orf11\_40172341\_40172858**  
(P=0.0598, Diff = 4.84)  
primary somatosensory cortex

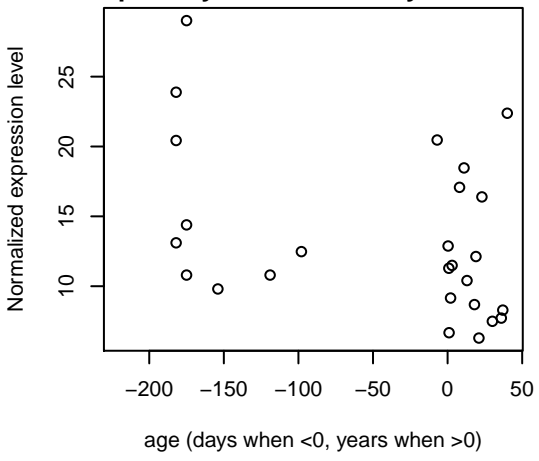

**C7orf11\_40173827\_40174258**  
(P=0.0078, Diff = 8.2)  
primary somatosensory cortex

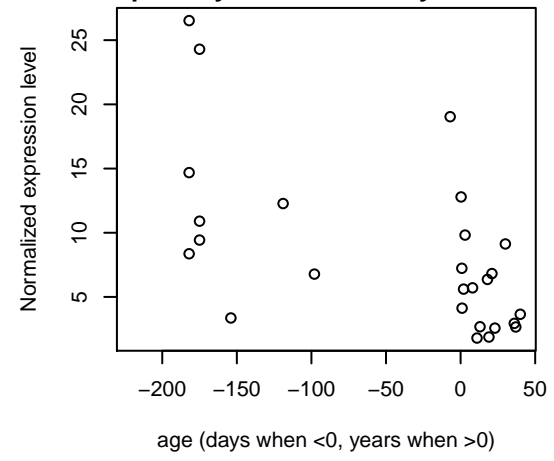

**KLF13\_31619057\_31619992**  
(P=0.0406, Diff = 1.77)  
primary visual cortex

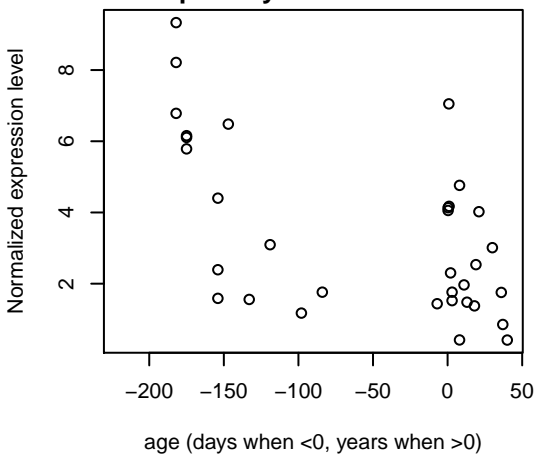

**KLF13\_31632135\_31632190**  
(P=0.0661, Diff = -0.26)  
primary visual cortex

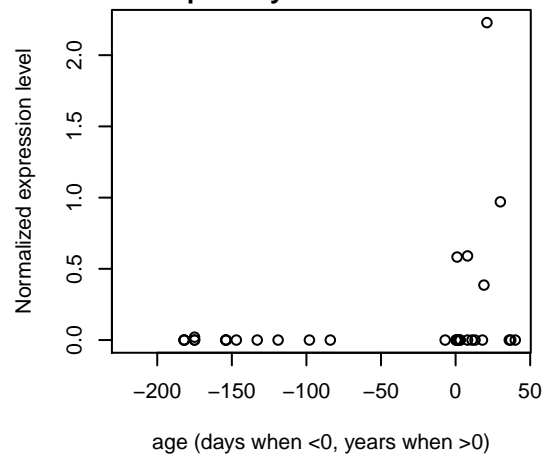

**KLF13\_31658356\_31658757**  
(P=0.0084, Diff = -0.54)  
primary visual cortex

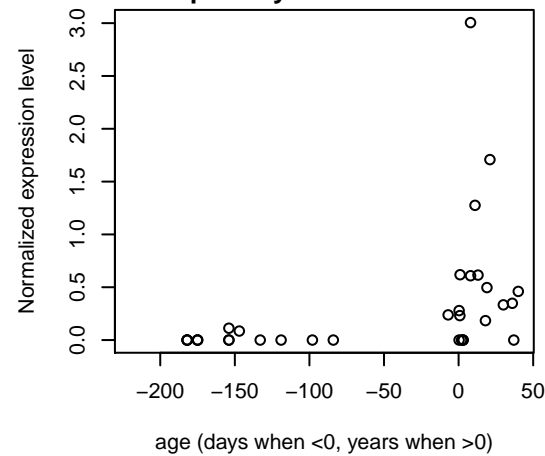

**KLF13\_31664212\_31670102**  
(P=0.0576, Diff = -7.01)  
primary visual cortex

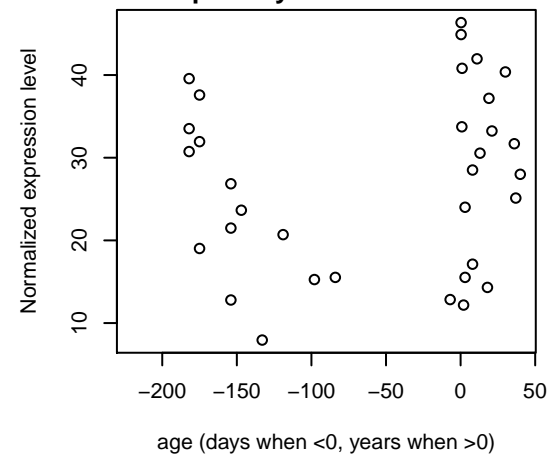

**KLF13\_31685045\_31685458**  
(P=0.0099, Diff = -0.23)  
primary visual cortex

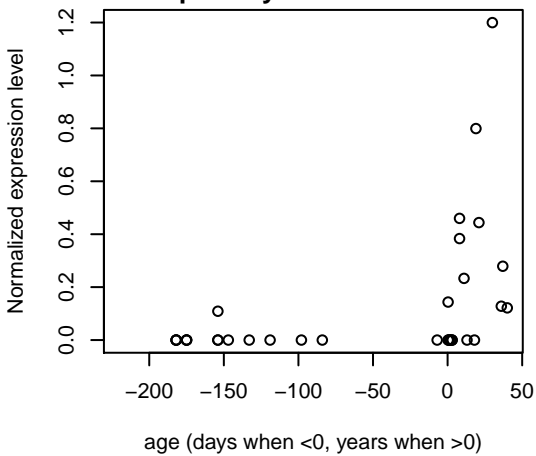

**KLF13\_31685777\_31685894**  
(P=0.002, Diff = -0.8)  
primary visual cortex

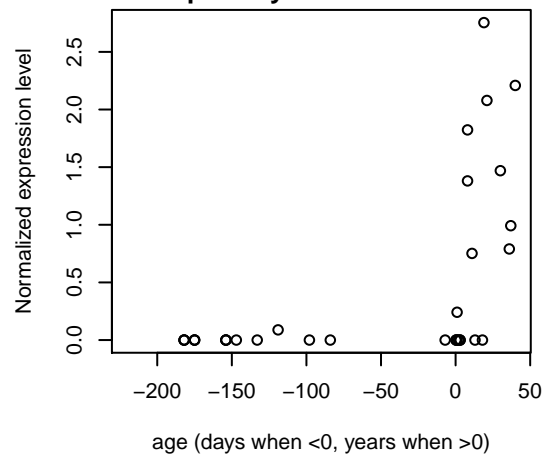

**KLF13\_31695630\_31696113**  
(P=0.0013, Diff = -0.7)  
primary visual cortex

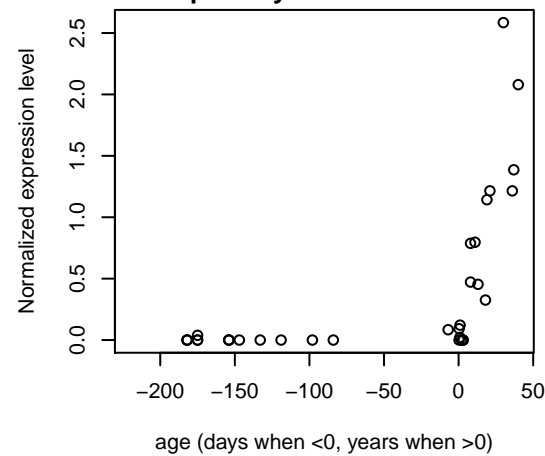

**KLF13\_31727572\_31727868**  
(P=0.0169, Diff = -0.31)  
primary visual cortex

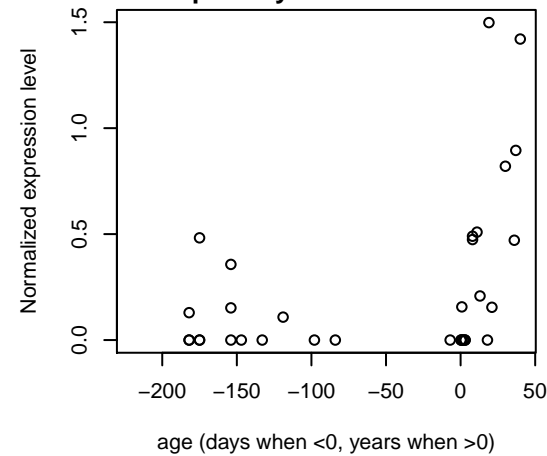

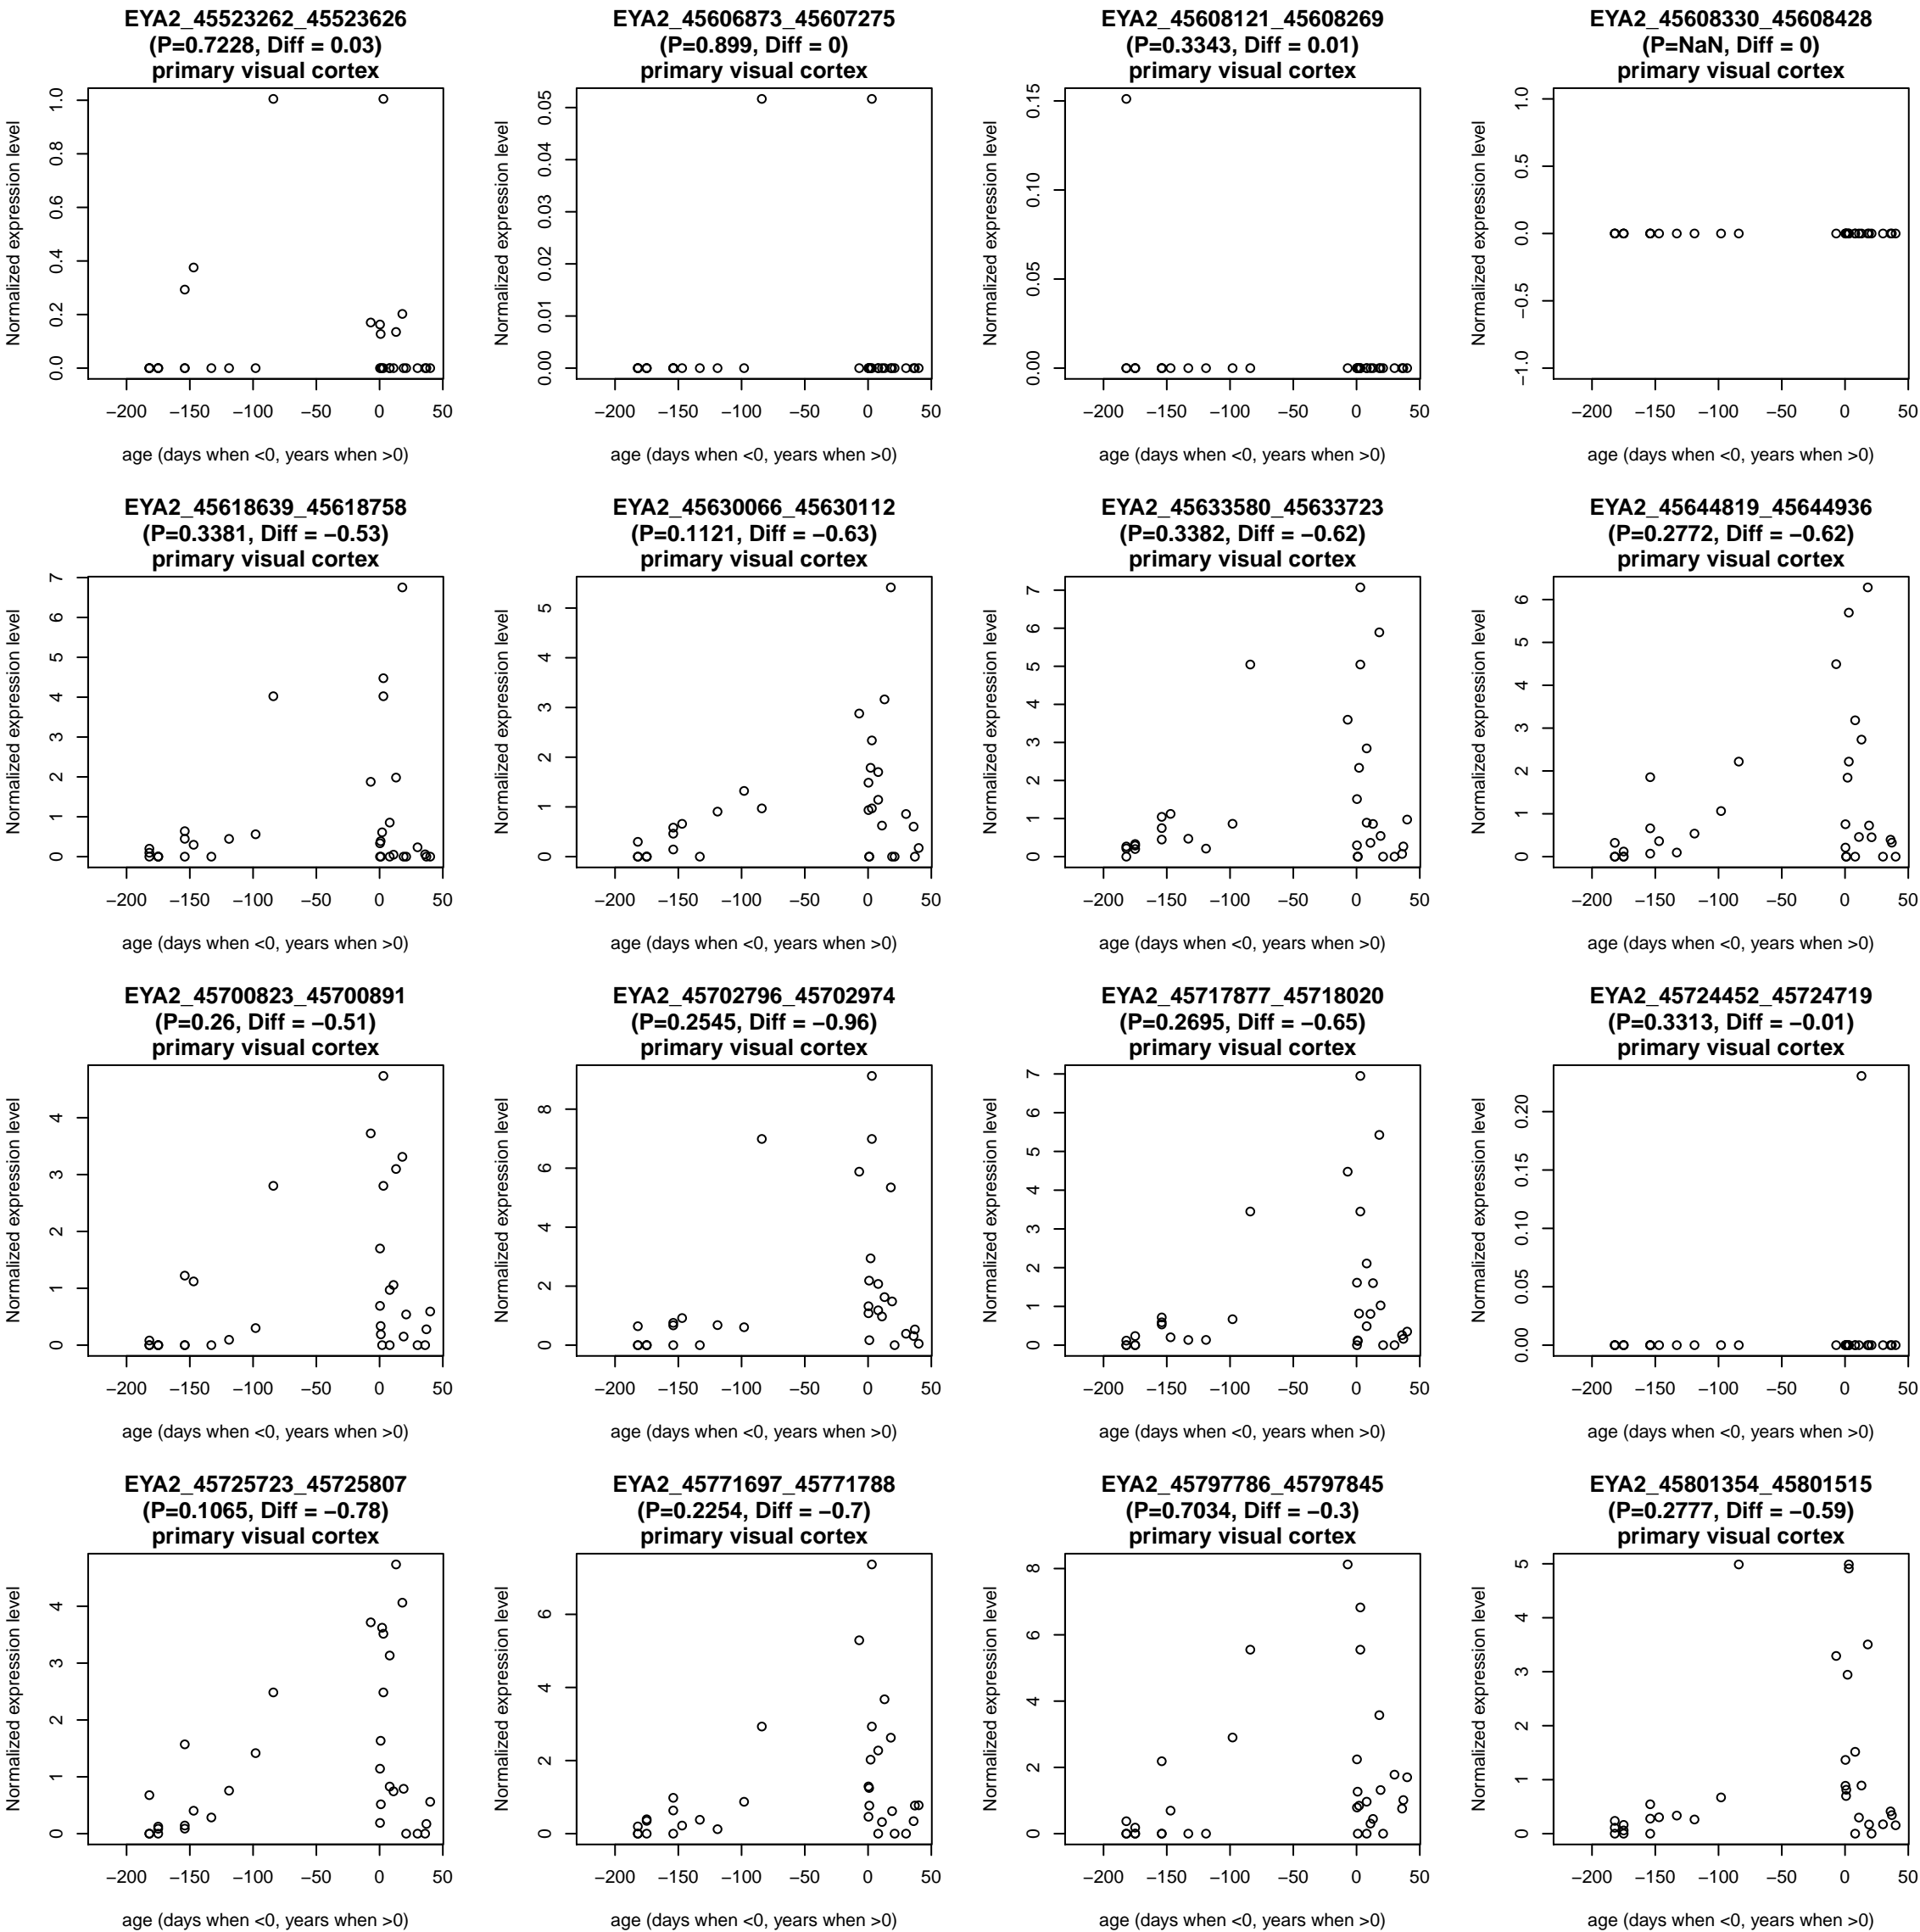

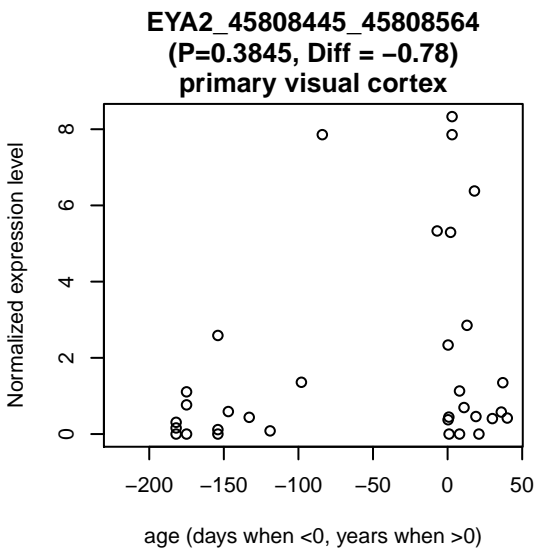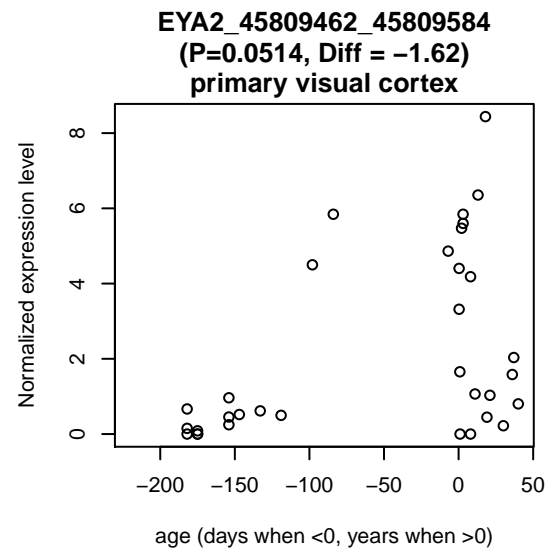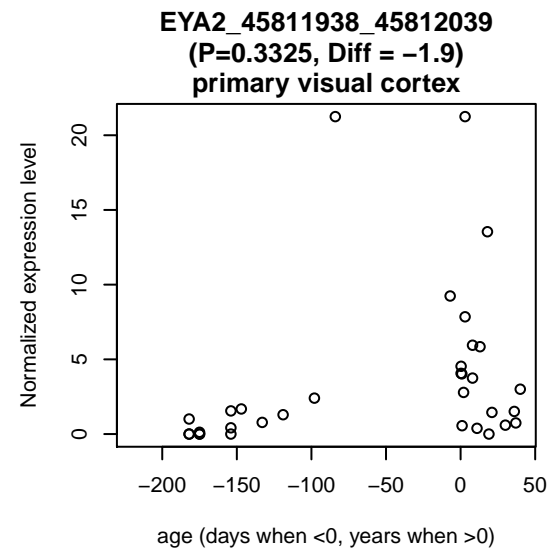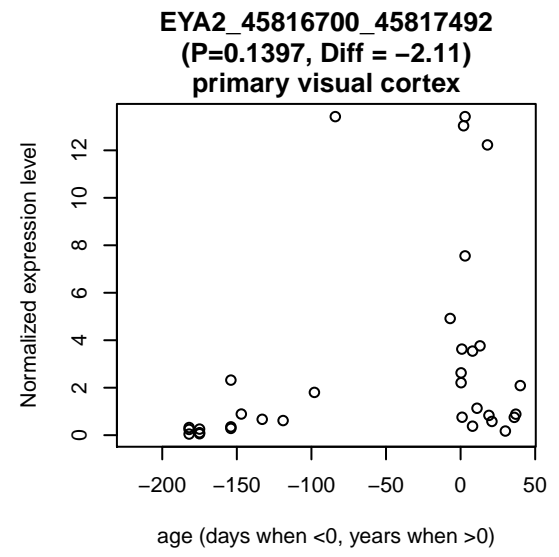

**LMCD1\_8543392\_8543666**  
(P=0.704, Diff = 0.09)  
primary visual cortex

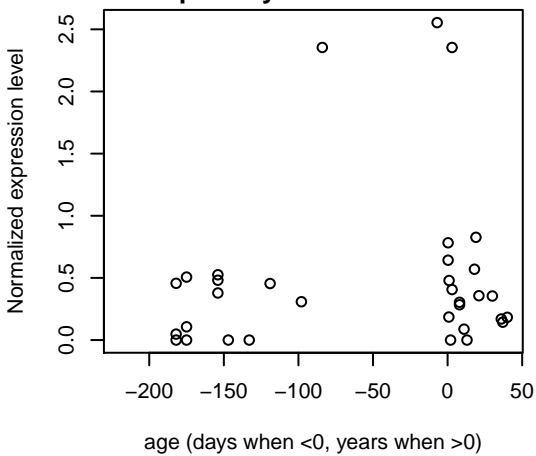

**LMCD1\_8556610\_8556681**  
(P=0.6784, Diff = -0.02)  
primary visual cortex

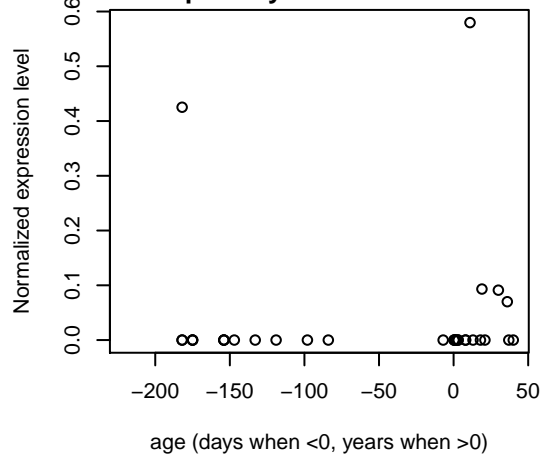

**LMCD1\_8574422\_8574511**  
(P=0.5907, Diff = -0.6)  
primary visual cortex

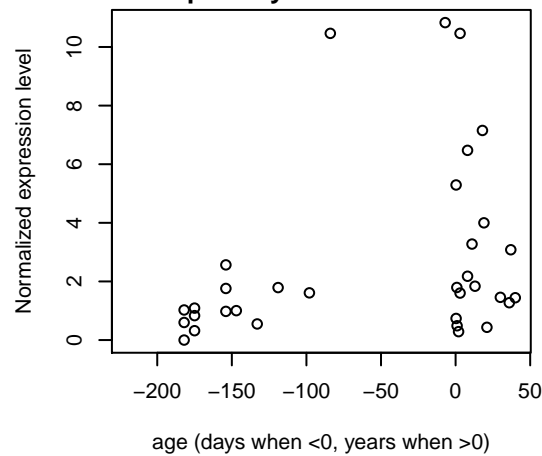

**LMCD1\_8578868\_8579204**  
(P=0.6879, Diff = -0.36)  
primary visual cortex

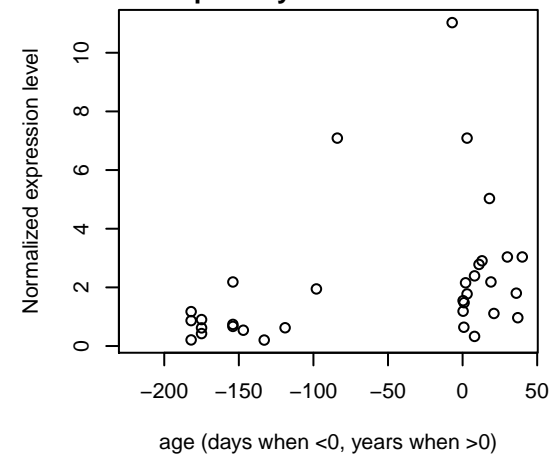

**LMCD1\_8590253\_8590589**  
(P=0.4188, Diff = -0.61)  
primary visual cortex

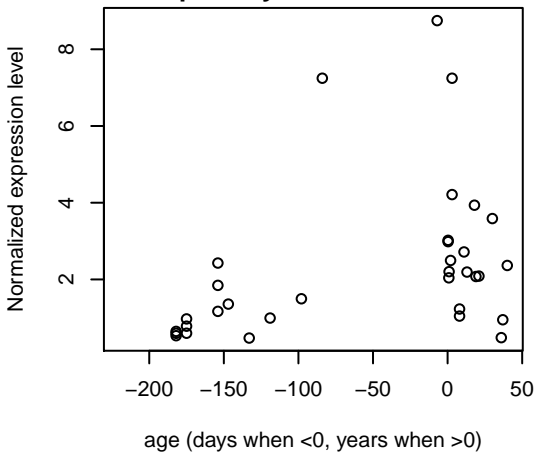

**LMCD1\_8591559\_8592135**  
(P=0.9867, Diff = 0)  
primary visual cortex

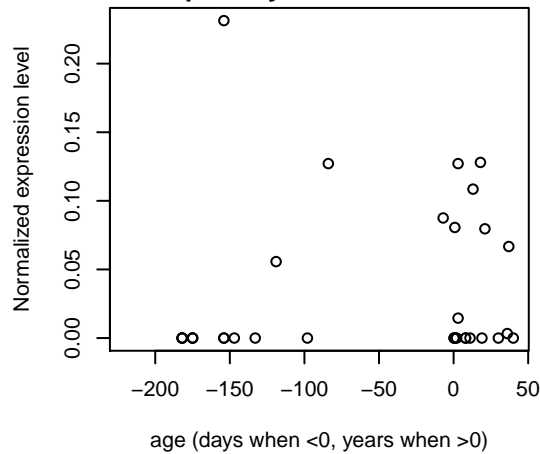

**LMCD1\_8607117\_8607333**  
(P=0.5744, Diff = -0.37)  
primary visual cortex

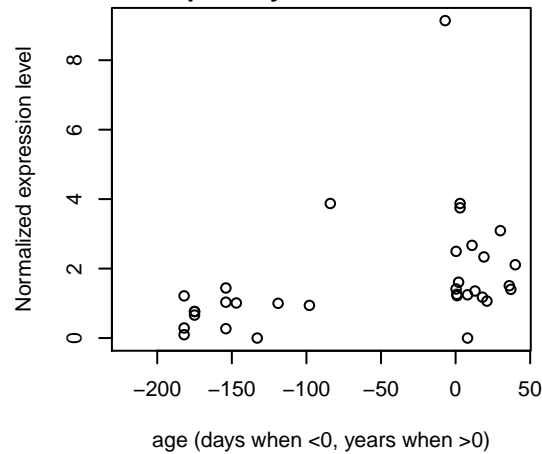

**LMCD1\_8609125\_8609805**  
(P=0.3361, Diff = -1.08)  
primary visual cortex

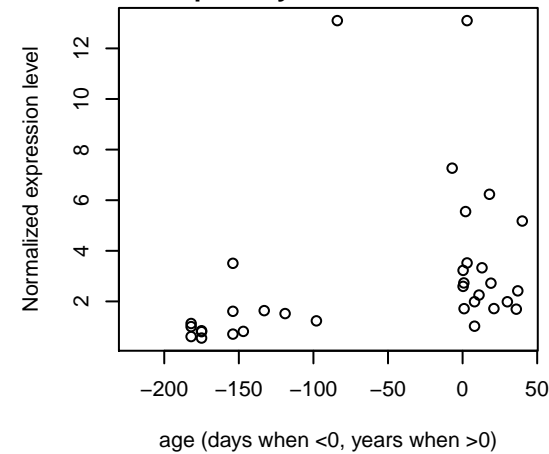

**WVOX\_78133550\_78133782**  
(P=0.447, Diff = -0.74)  
primary visual cortex

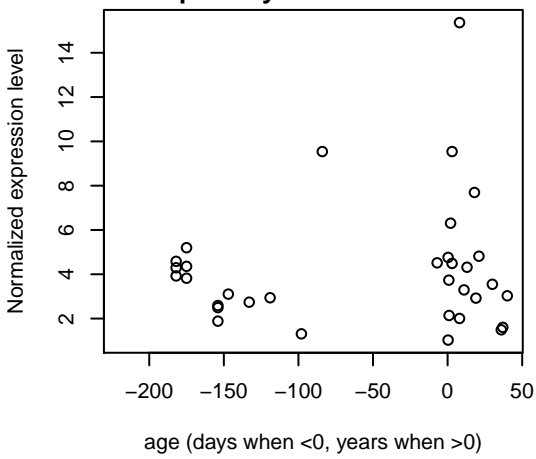

**WVOX\_78142319\_78142384**  
(P=0.093, Diff = -1.55)  
primary visual cortex

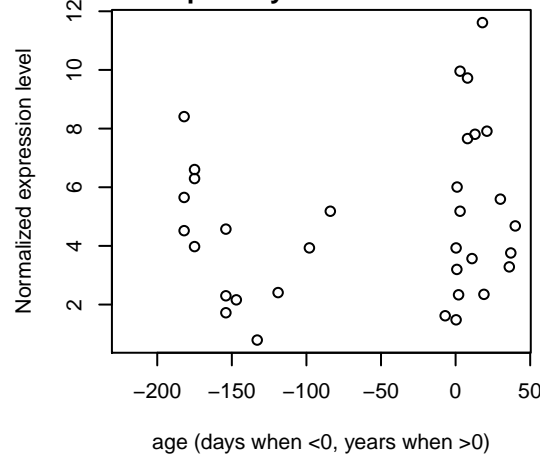

**WVOX\_78143674\_78143732**  
(P=0.0594, Diff = -1.95)  
primary visual cortex

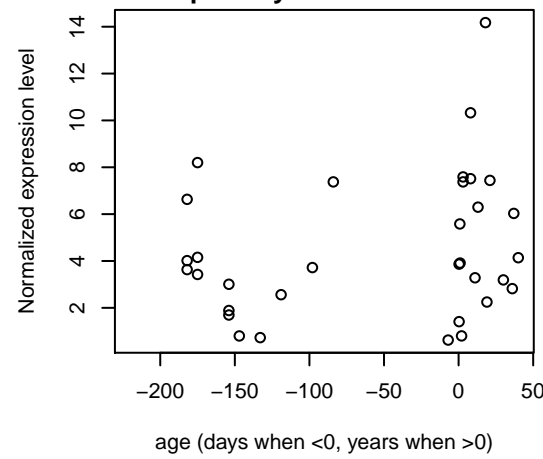

**WVOX\_78148872\_78149051**  
(P=0.347, Diff = -0.84)  
primary visual cortex

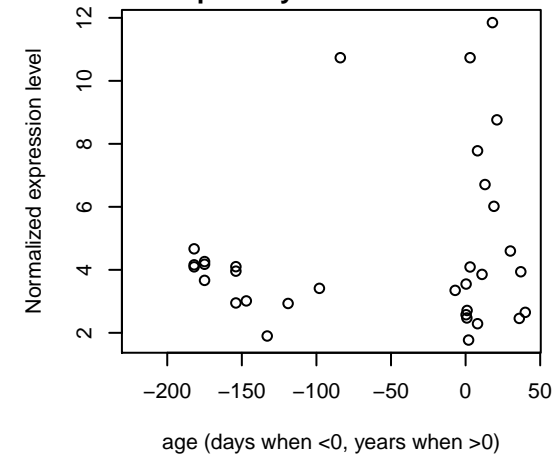

**WVOX\_78198079\_78198186**  
(P=0.0936, Diff = -1.13)  
primary visual cortex

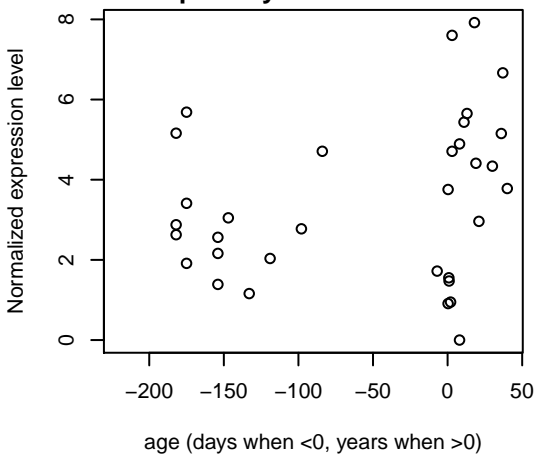

**WVOX\_78312499\_78312593**  
(P=0.8181, Diff = 0.01)  
primary visual cortex

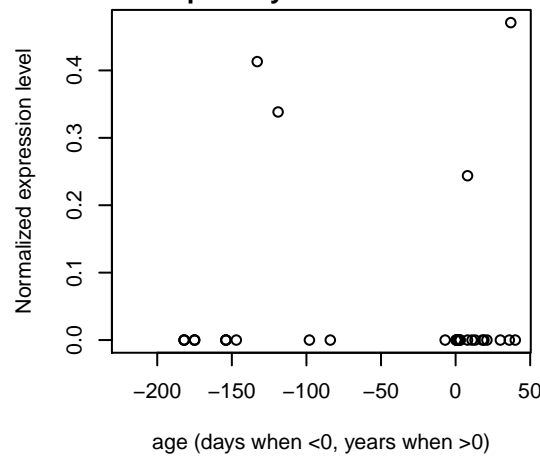

**WVOX\_78420756\_78420845**  
(P=0.0024, Diff = -2.89)  
primary visual cortex

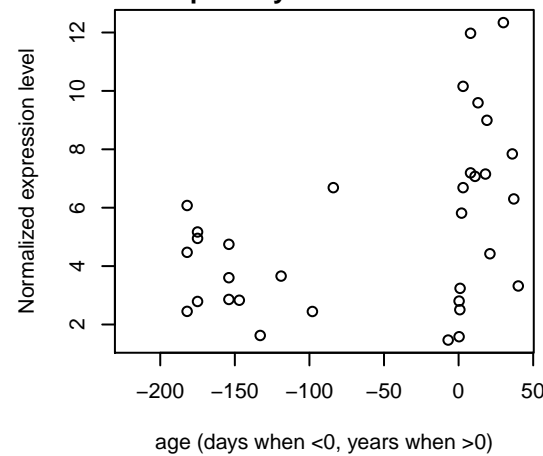

**WVOX\_78458766\_78458952**  
(P=0.0046, Diff = -2.66)  
primary visual cortex

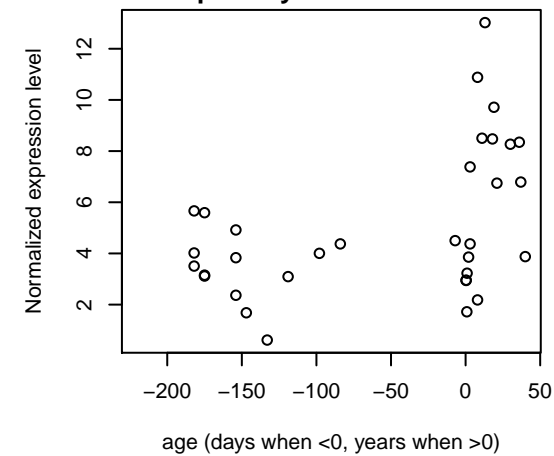

**WVOX\_78466384\_78466649**  
(P=8e-04, Diff = -2.46)  
primary visual cortex

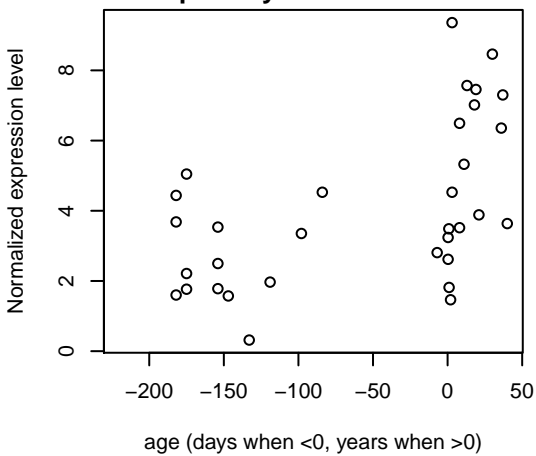

**WVOX\_78790836\_78790912**  
(P=0.9235, Diff = 0)  
primary visual cortex

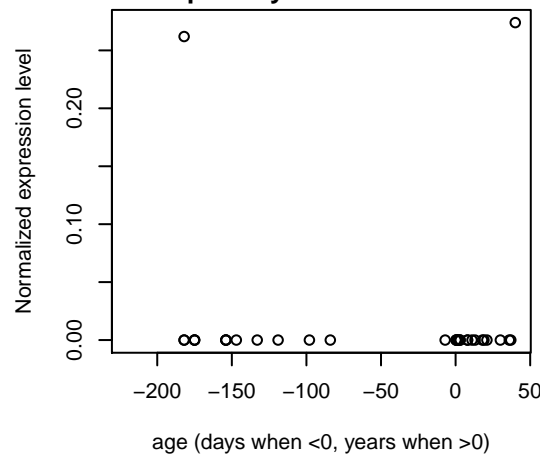

**WVOX\_79245504\_79246031**  
(P=0.0014, Diff = -2.72)  
primary visual cortex

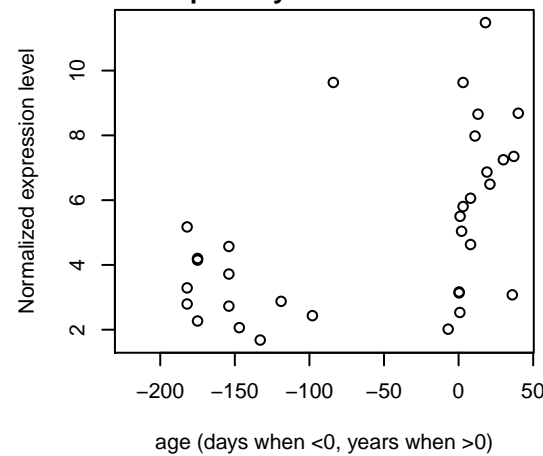

**SLC13A3\_45186462\_45188837**  
(P=0.1295, Diff = -1.16)  
primary visual cortex

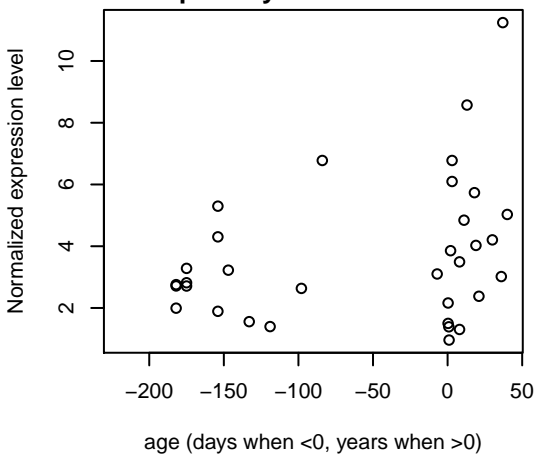

**SLC13A3\_45192052\_45192190**  
(P=0.8205, Diff = -0.16)  
primary visual cortex

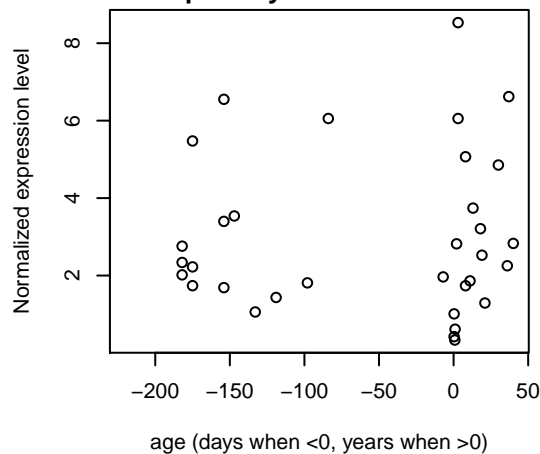

**SLC13A3\_45194867\_45195029**  
(P=0.2687, Diff = 0.84)  
primary visual cortex

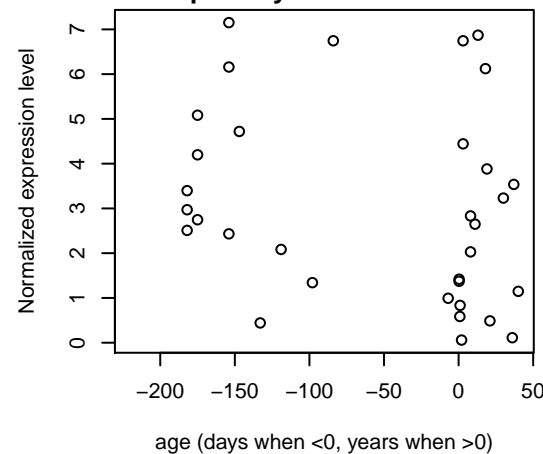

**SLC13A3\_45204211\_45204324**  
(P=0.631, Diff = 0.27)  
primary visual cortex

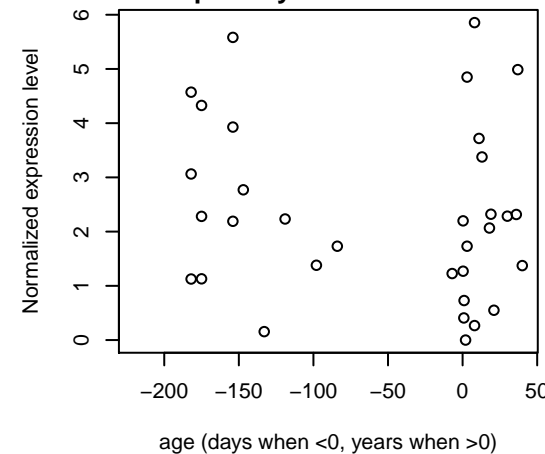

**SLC13A3\_45211549\_45212308**  
(P=0.9506, Diff = 0.01)  
primary visual cortex

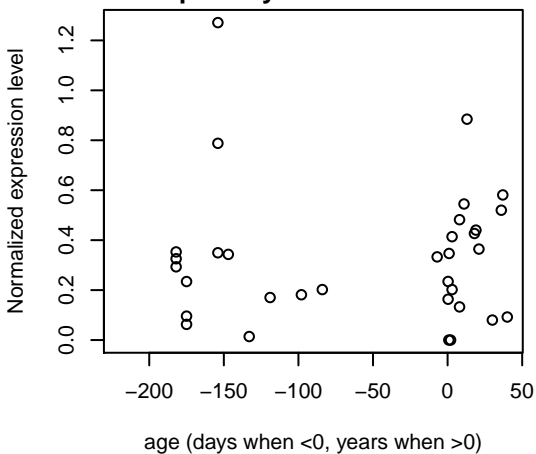

**SLC13A3\_45213986\_45214382**  
(P=0.0115, Diff = 0.32)  
primary visual cortex

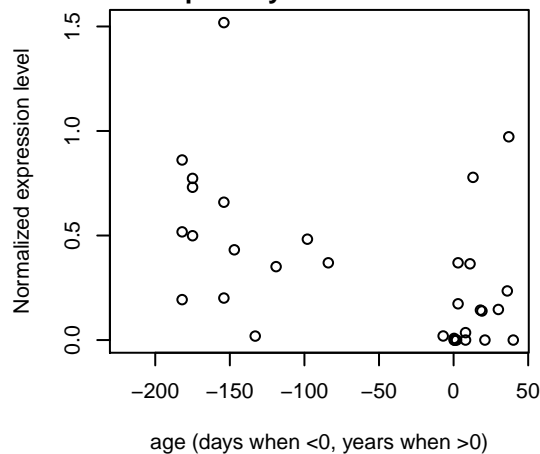

**SLC13A3\_45216697\_45216802**  
(P=0.0273, Diff = 1.78)  
primary visual cortex

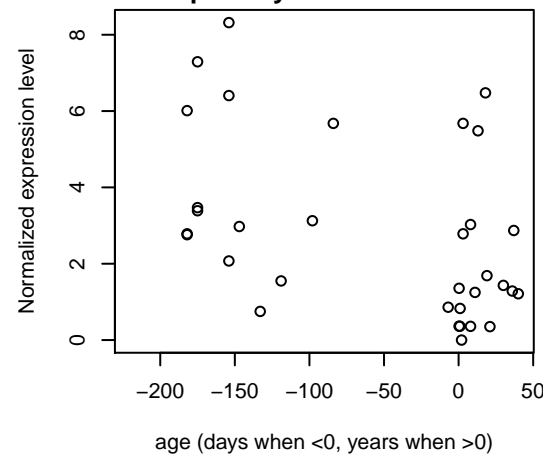

**SLC13A3\_45217798\_45217894**  
(P=0.0714, Diff = 0.92)  
primary visual cortex

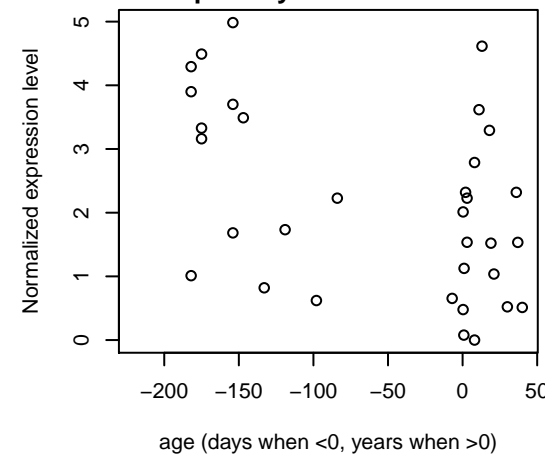

**SLC13A3\_45221042\_45221168**  
(P=0.6156, Diff = 0.24)  
primary visual cortex

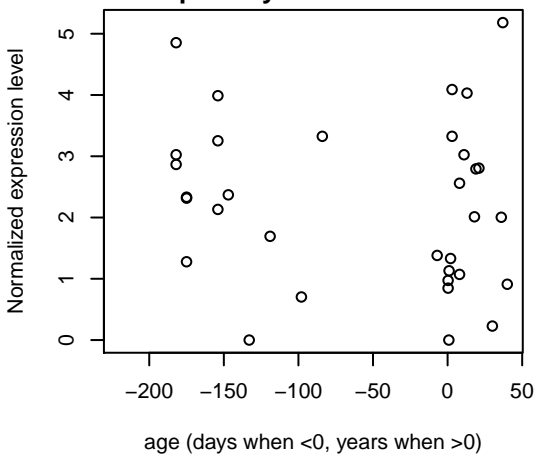

**SLC13A3\_45224795\_45224981**  
(P=0.0042, Diff = 2.3)  
primary visual cortex

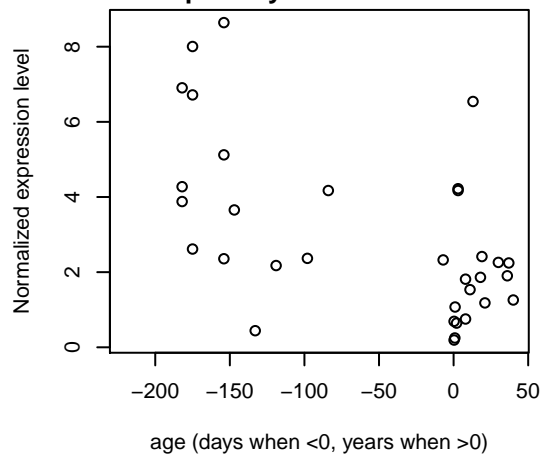

**SLC13A3\_45228609\_45228676**  
(P=0.0091, Diff = 2.37)  
primary visual cortex

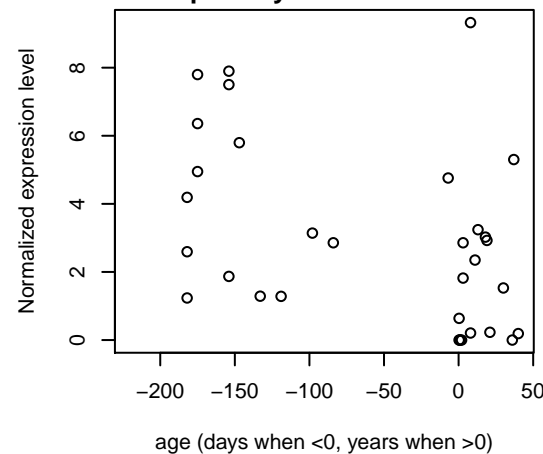

**SLC13A3\_45229226\_45229255**  
(P=0.3343, Diff = 0.04)  
primary visual cortex

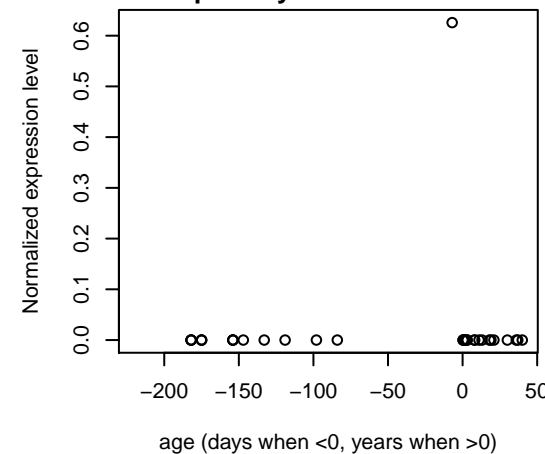

**SLC13A3\_45237347\_45237696**  
(P=0.2543, Diff = 0.1)  
primary visual cortex

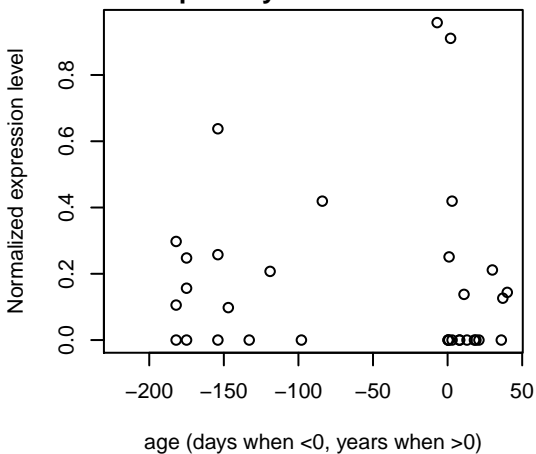

**SLC13A3\_45239084\_45239248**  
(P=0.0235, Diff = 1.68)  
primary visual cortex

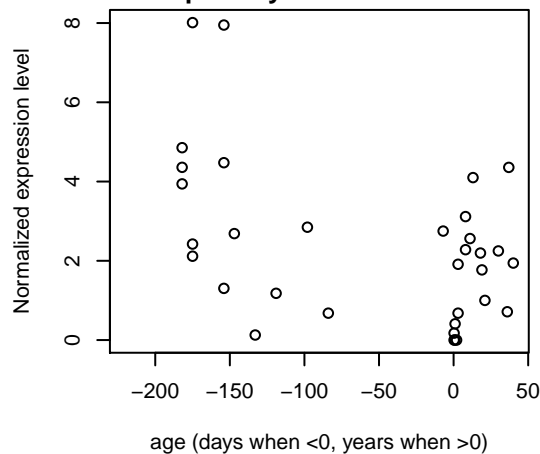

**SLC13A3\_45242098\_45242525**  
(P=0.0532, Diff = 0.77)  
primary visual cortex

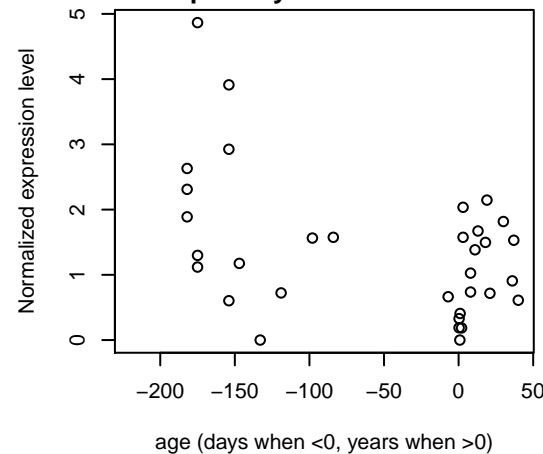

**SLC13A3\_45279949\_45280098**  
(P=0.1644, Diff = -0.17)  
primary visual cortex

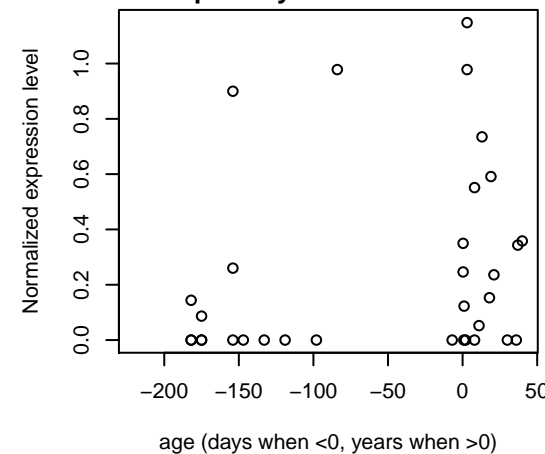



**SLC13A3\_45298681\_45298778**  
(P=0.001, Diff = 1.91)  
primary visual cortex

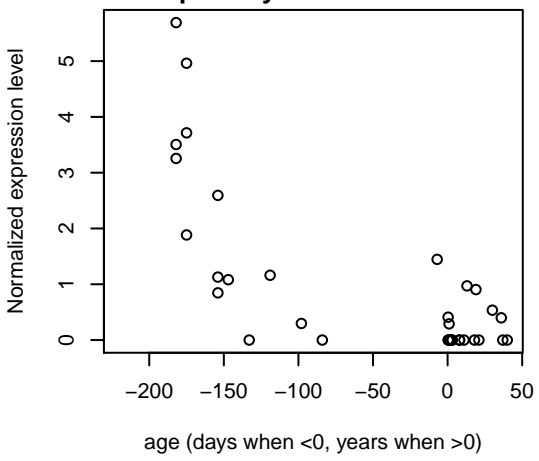

**SLC13A3\_45302302\_45302417**  
(P=0.2357, Diff = 0.13)  
primary visual cortex

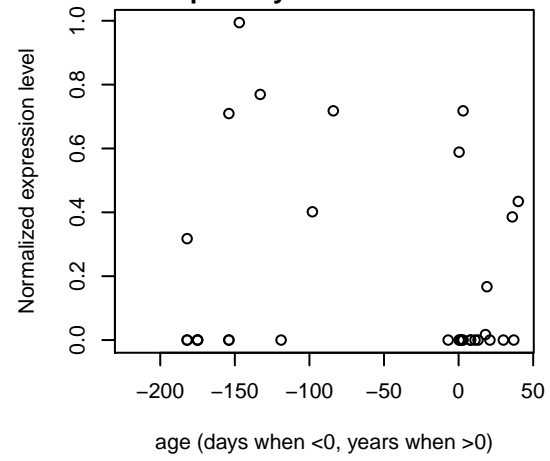

**SLC13A3\_45304585\_45304714**  
(P=0.7194, Diff = -0.06)  
primary visual cortex

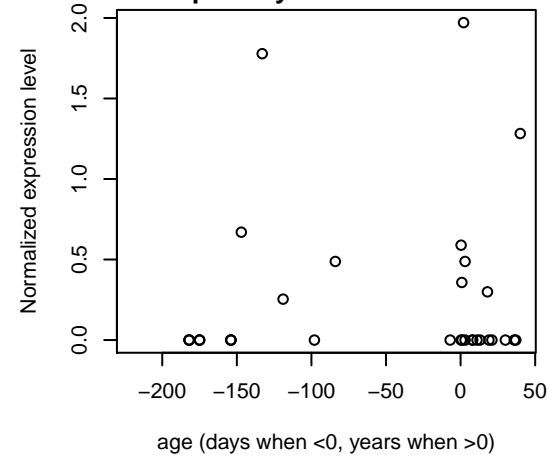

**HTR1B\_78171947\_78173490**  
**(P=0.003, Diff = -2.07)**  
**primary visual cortex**

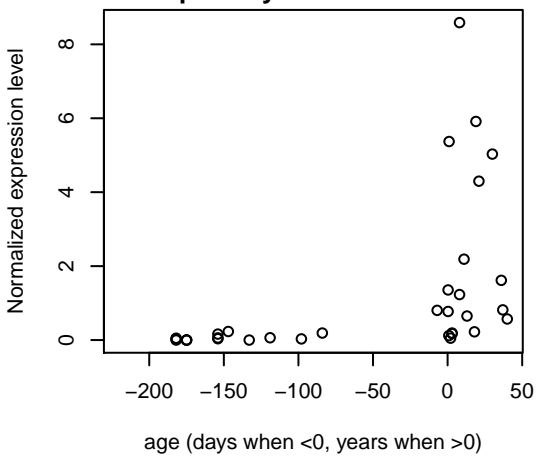

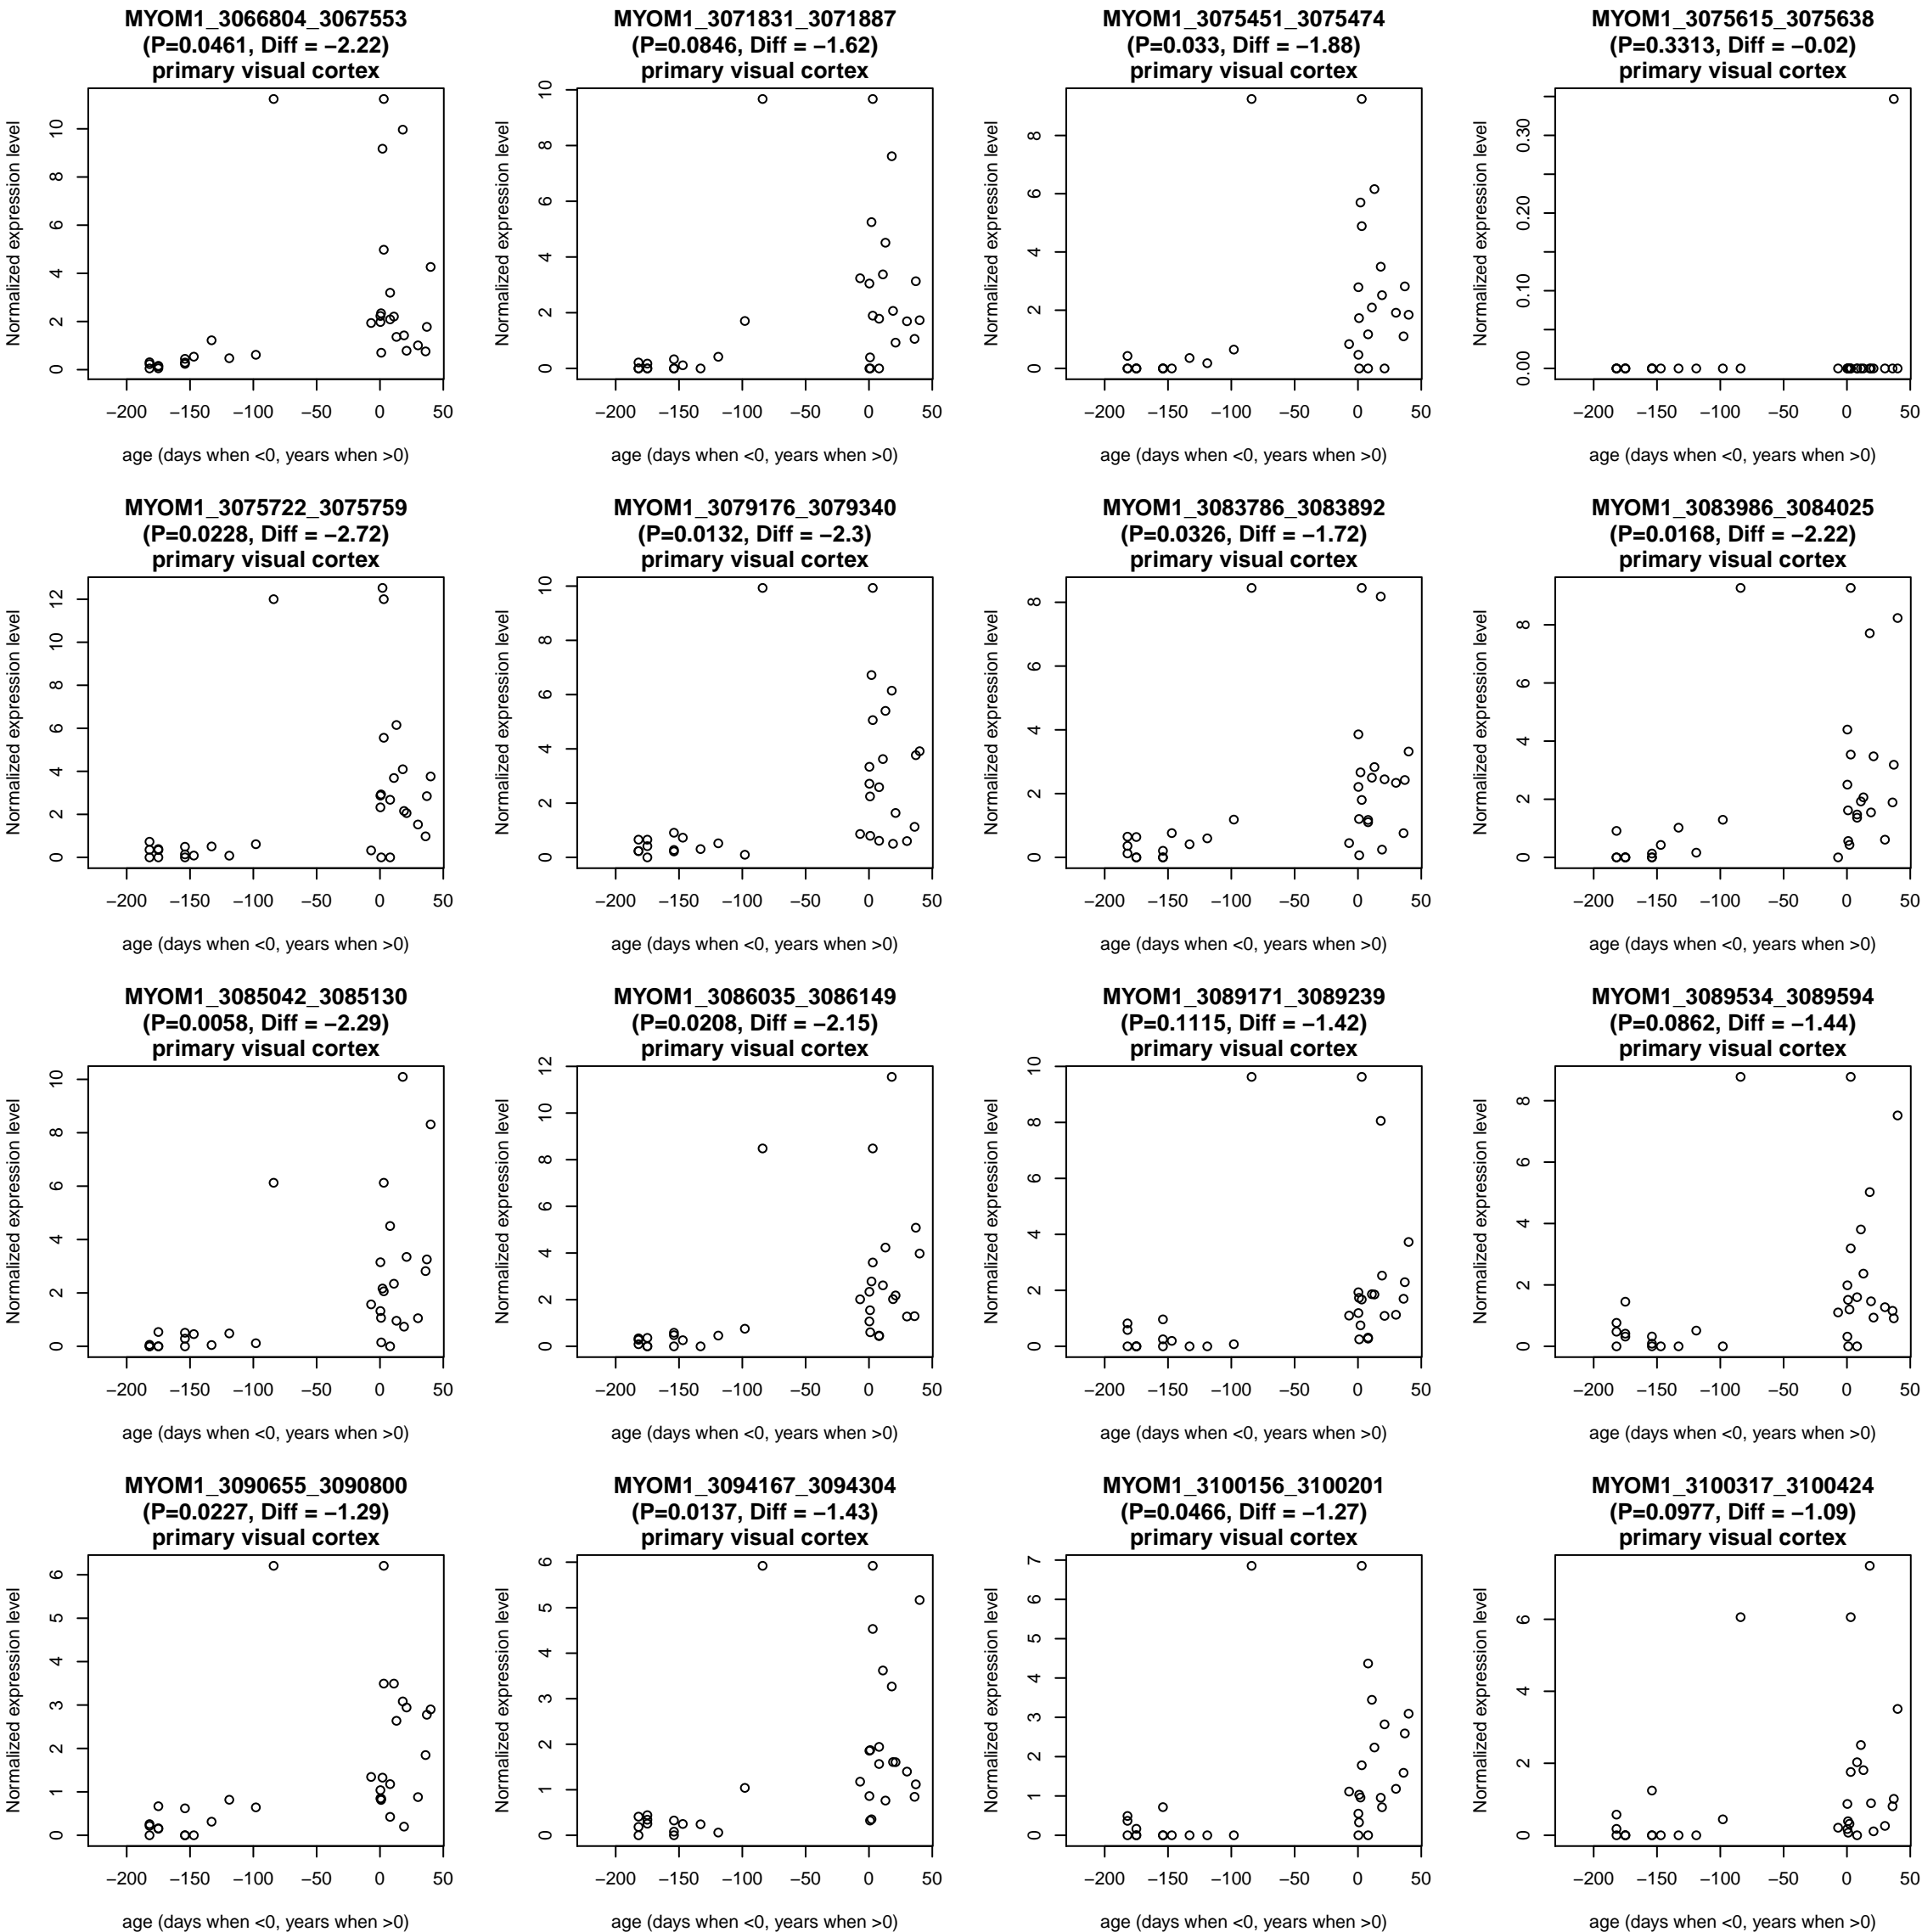

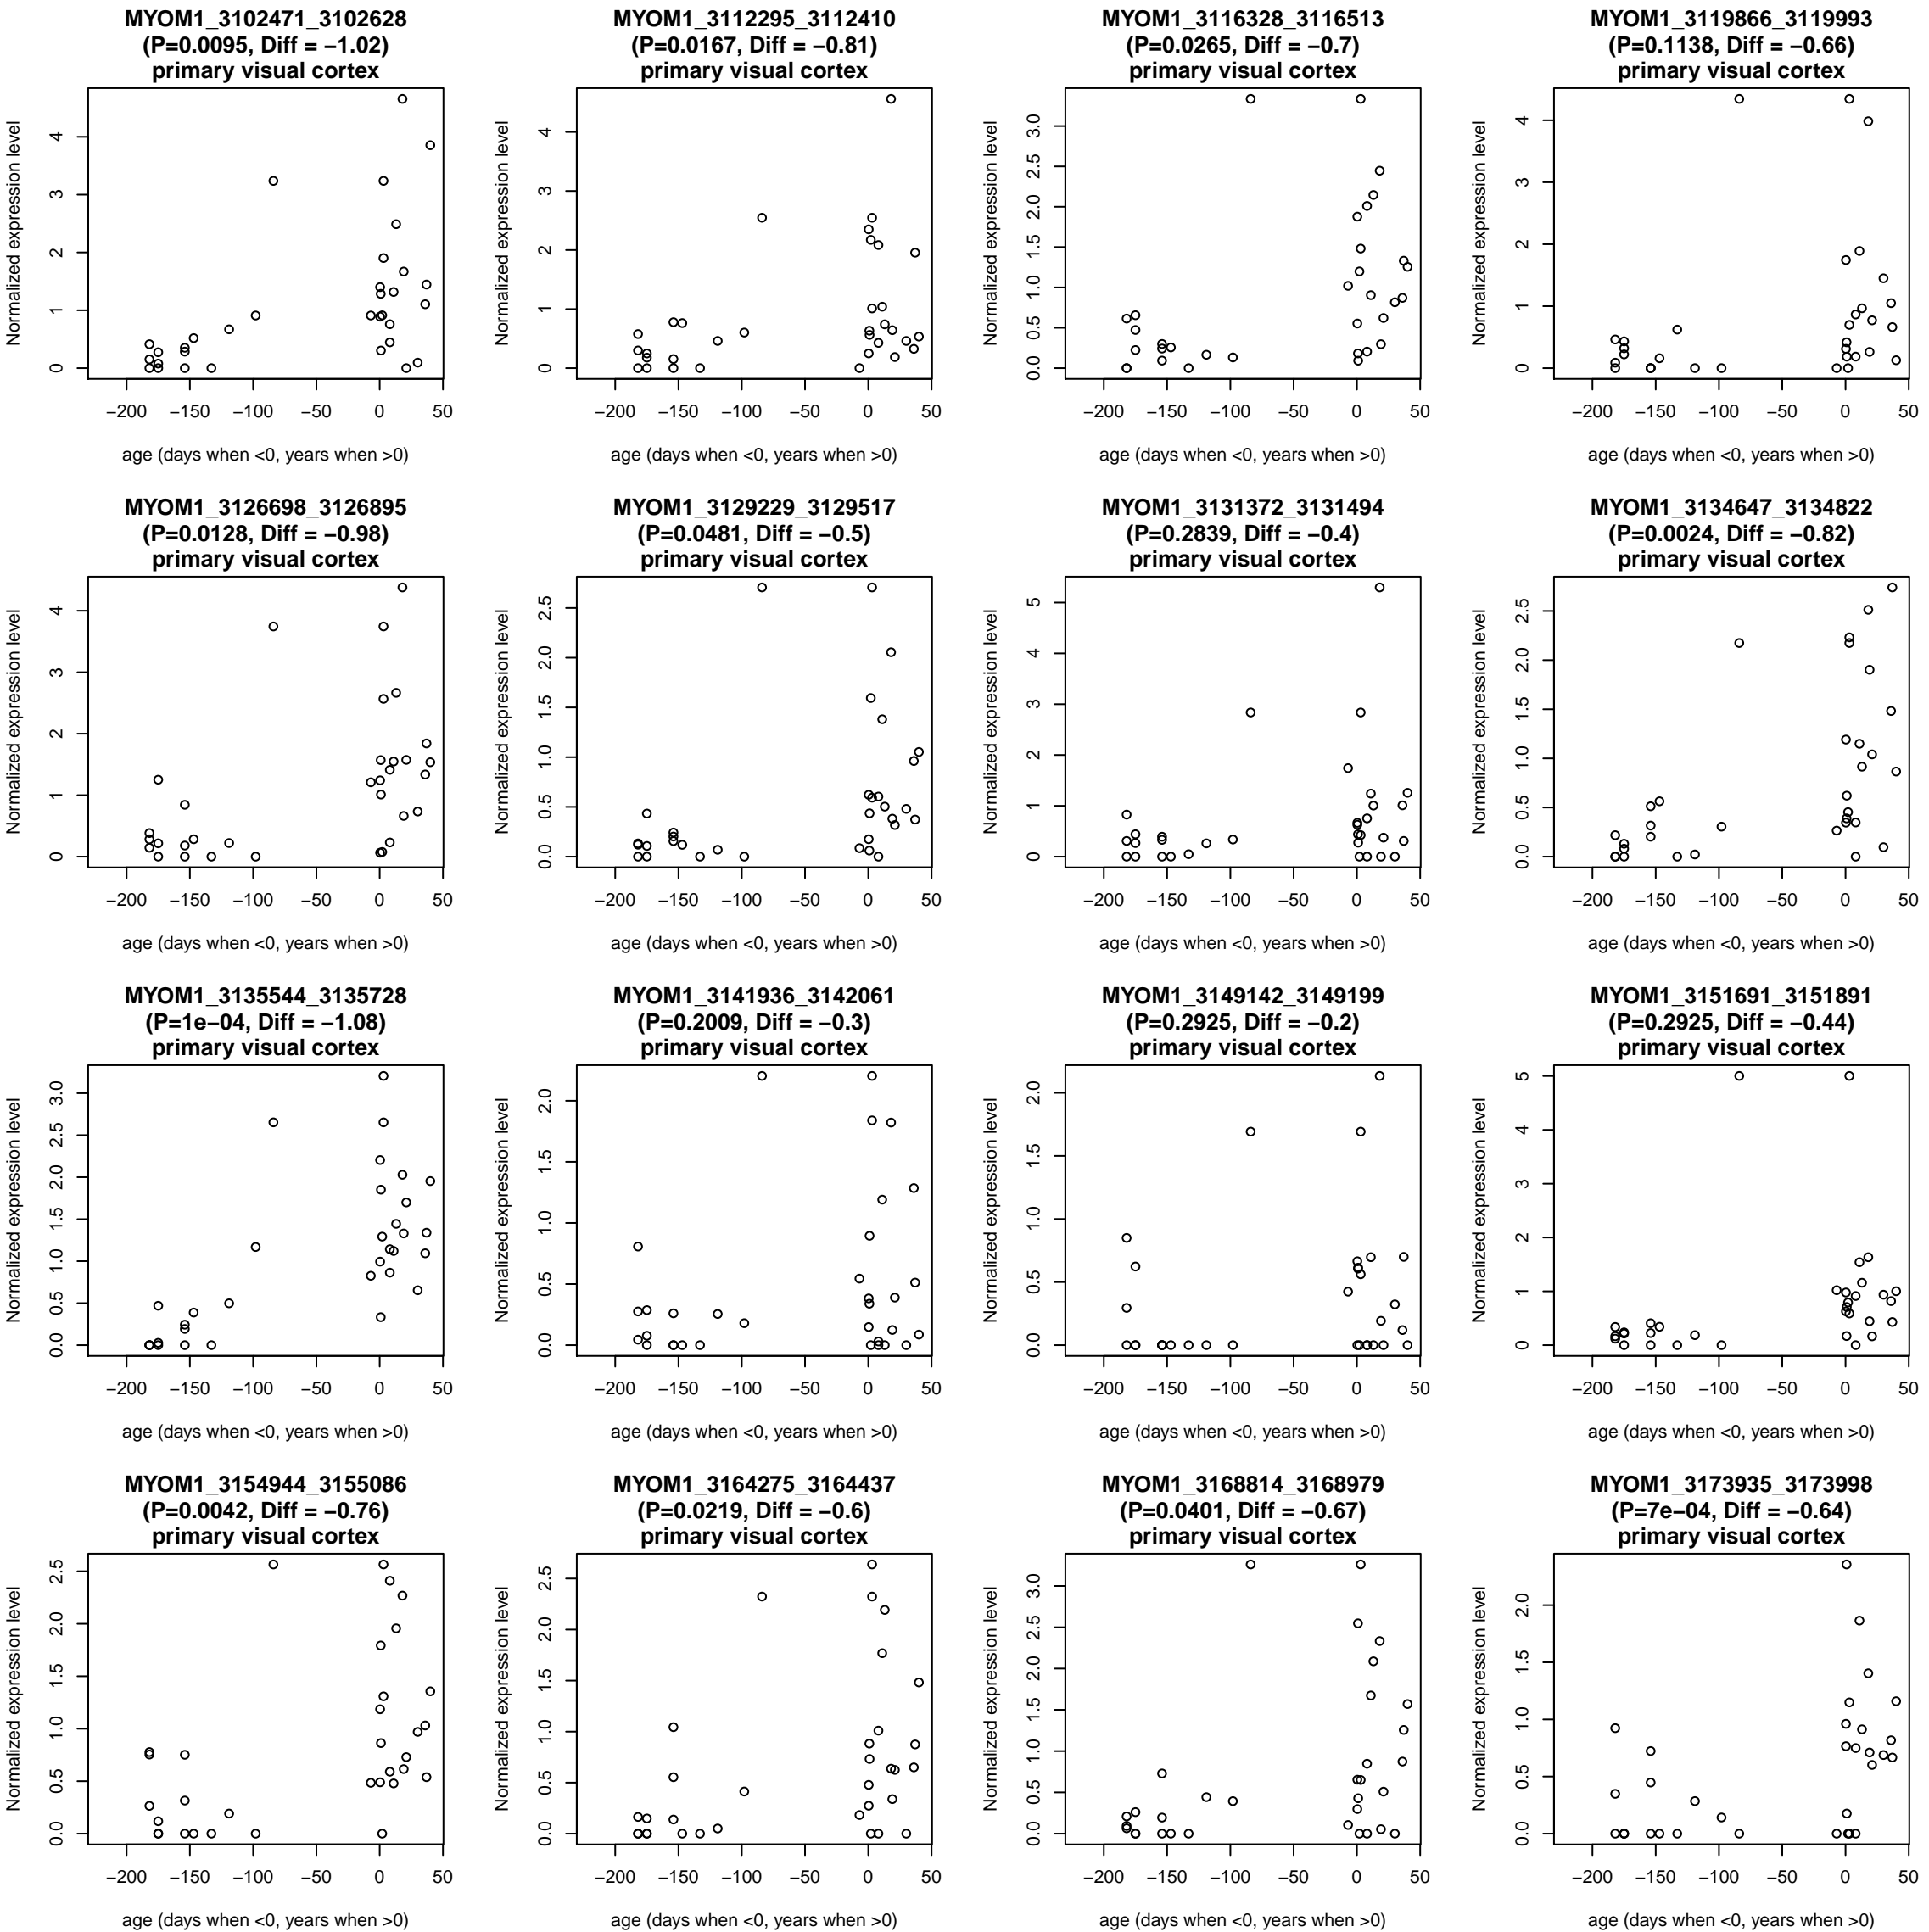

**MYOM1\_3174117\_3174206**  
(P=0.0145, Diff = -0.6)  
primary visual cortex

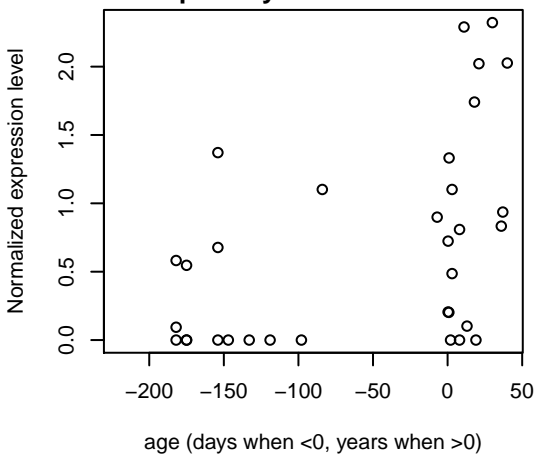

**MYOM1\_3176039\_3176132**  
(P=0.0437, Diff = -0.44)  
primary visual cortex

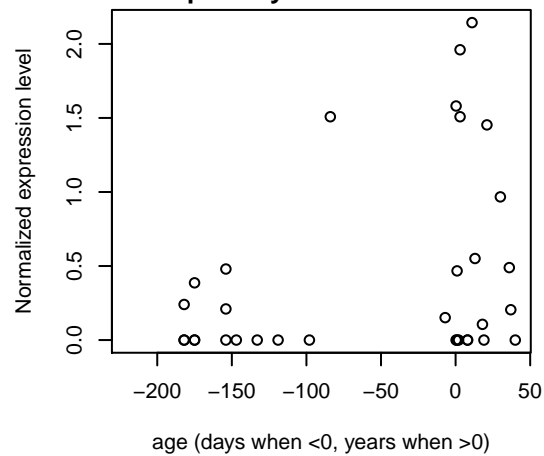

**MYOM1\_3187477\_3187635**  
(P=0.6518, Diff = -0.16)  
primary visual cortex

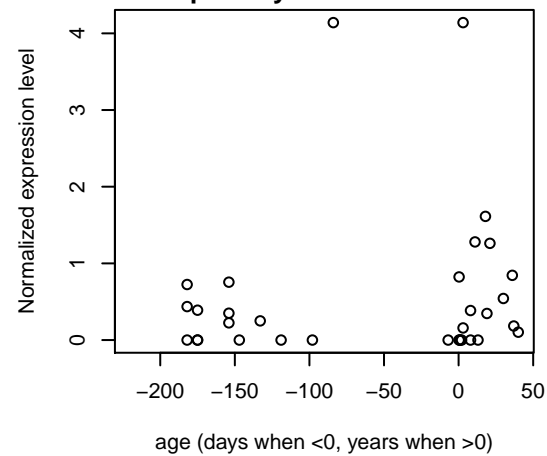

**MYOM1\_3188745\_3189085**  
(P=0.0157, Diff = -0.49)  
primary visual cortex

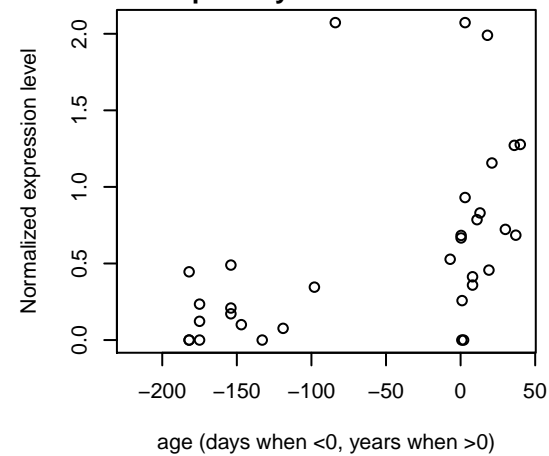

**MYOM1\_3193815\_3193956**  
(P=0.0189, Diff = -0.33)  
primary visual cortex

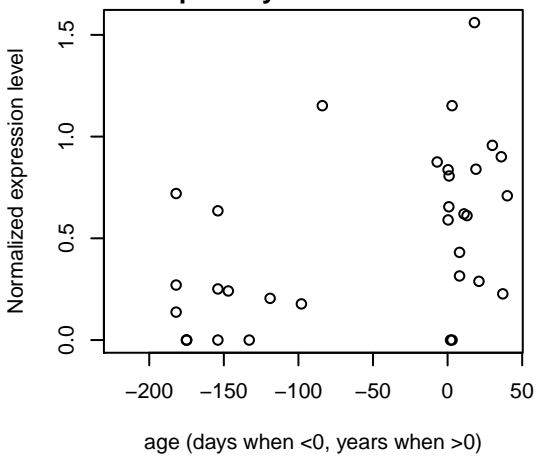

**MYOM1\_3214931\_3215249**  
(P=0.0257, Diff = -0.28)  
primary visual cortex

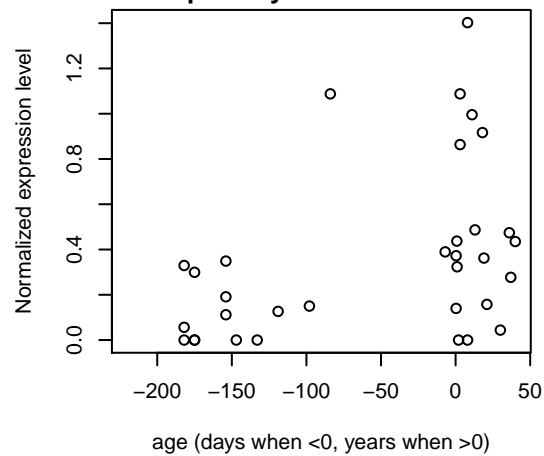

**MYOM1\_3219800\_3220106**  
(P=0.6704, Diff = -0.01)  
primary visual cortex

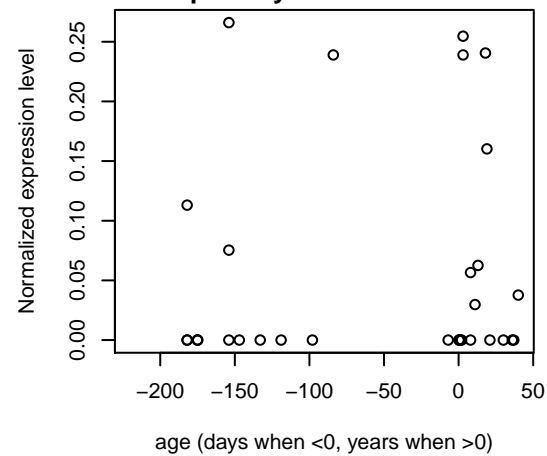

**USP44\_95910335\_95912129**  
(P=0.4625, Diff = 0.05)  
primary visual cortex

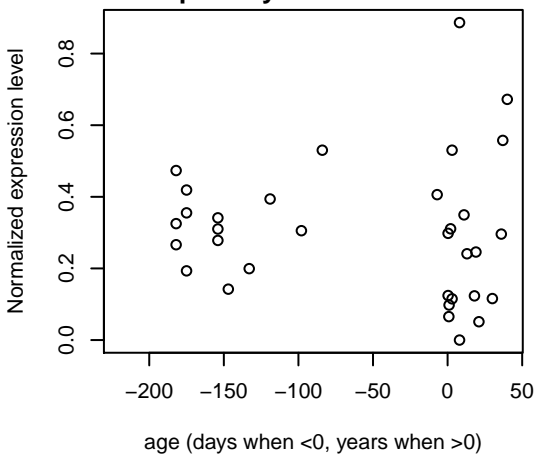

**USP44\_95914772\_95914978**  
(P=0.0331, Diff = 0.17)  
primary visual cortex

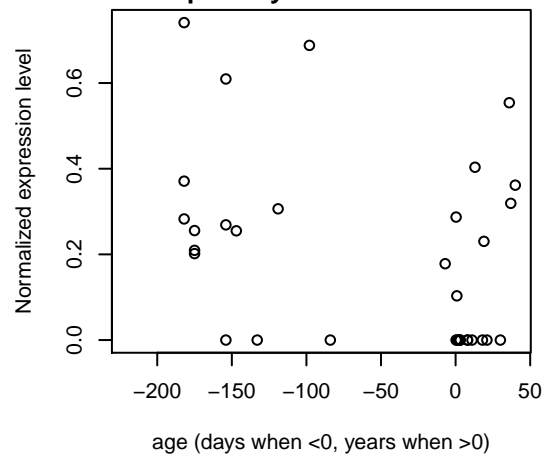

**USP44\_95918295\_95918564**  
(P=0.8659, Diff = 0.01)  
primary visual cortex

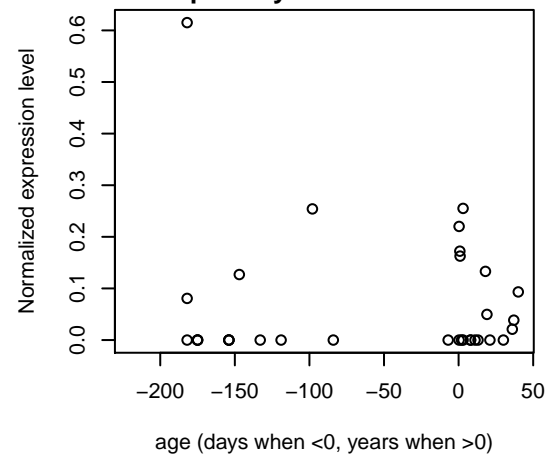

**USP44\_95922582\_95922778**  
(P=0.8684, Diff = 0.02)  
primary visual cortex

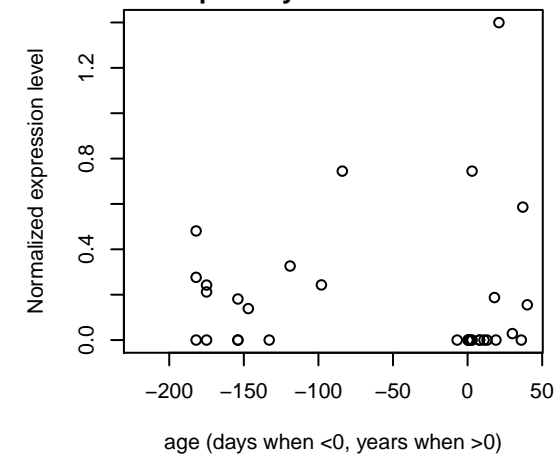

**USP44\_95926604\_95928102**  
(P=0.9843, Diff = 0)  
primary visual cortex

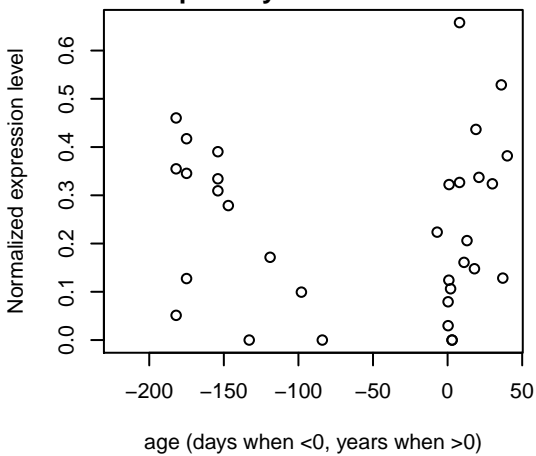

**USP44\_95929148\_95929202**  
(P=0.172, Diff = -0.07)  
primary visual cortex

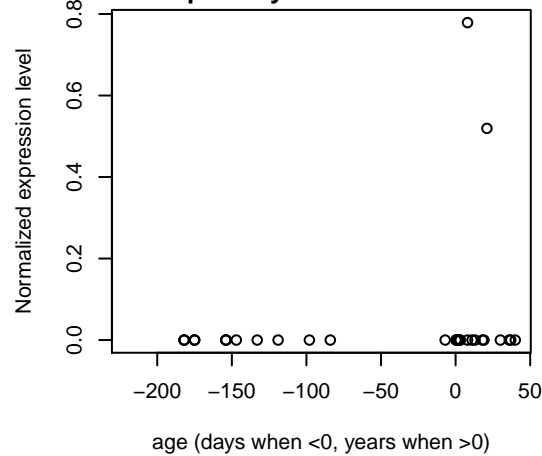

**USP44\_95940225\_95940766**  
(P=0.0094, Diff = -0.16)  
primary visual cortex

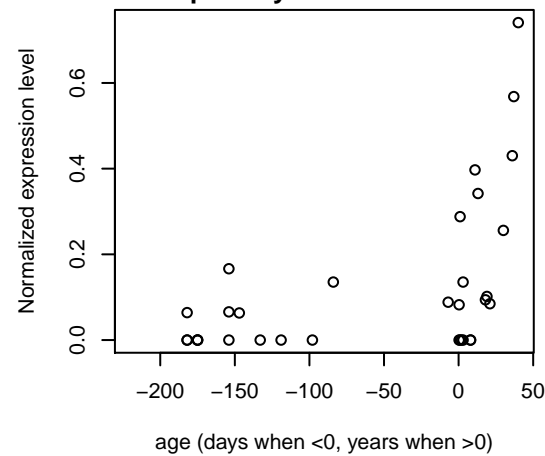

**USP44\_95941758\_95942048**  
(P=0.8137, Diff = 0.01)  
primary visual cortex

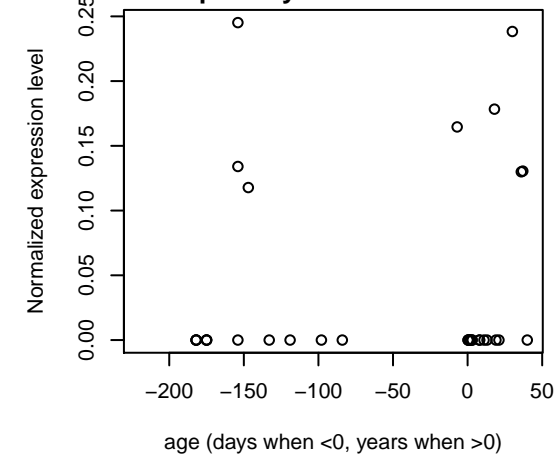

**USP44\_95942301\_95942620**  
(P=0.4852, Diff = 0.01)  
primary visual cortex

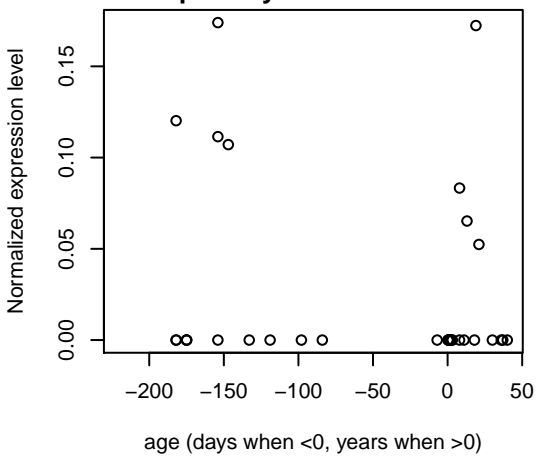

**USP44\_95945047\_95945266**  
(P=NaN, Diff = 0)  
primary visual cortex

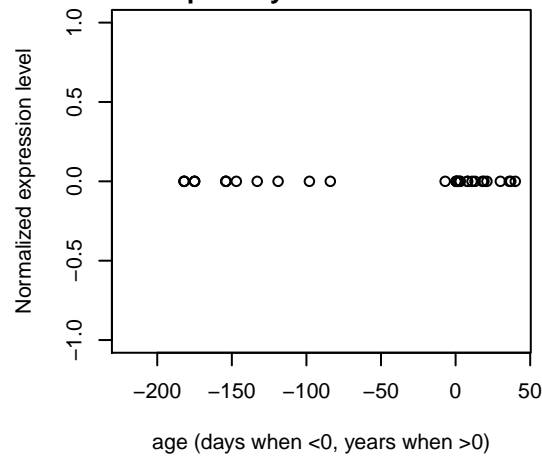

**IGFBP7\_57896938\_57897502**  
(P=0.1318, Diff = -26.98)  
primary visual cortex

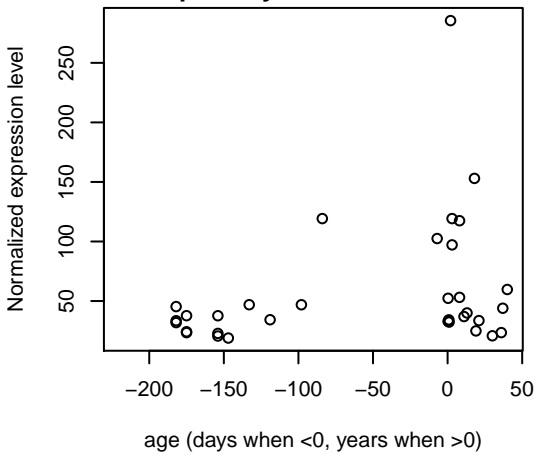

**IGFBP7\_57898203\_57898718**  
(P=0.1083, Diff = -26.57)  
primary visual cortex

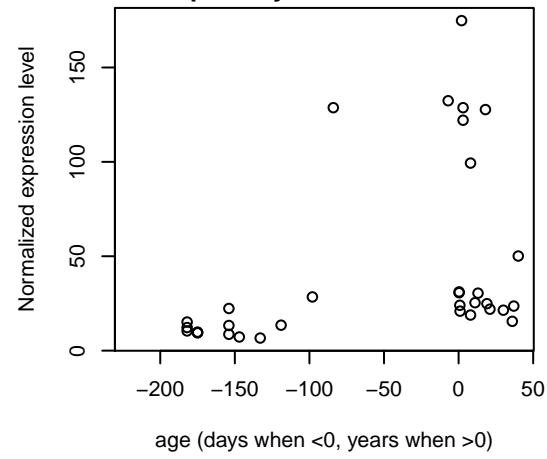

**IGFBP7\_57899360\_57899477**  
(P=0.1671, Diff = -83.27)  
primary visual cortex

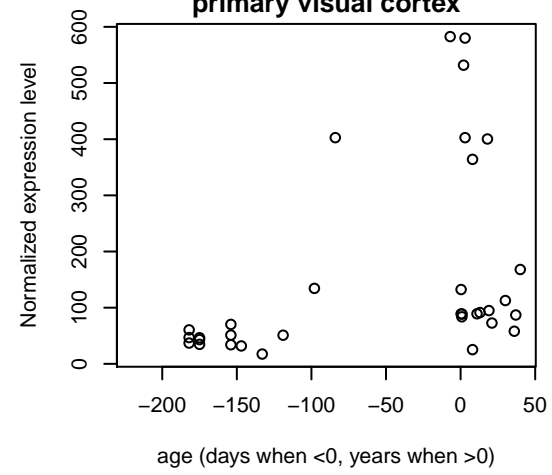

**IGFBP7\_57906989\_57907099**  
(P=0.2066, Diff = -75.62)  
primary visual cortex

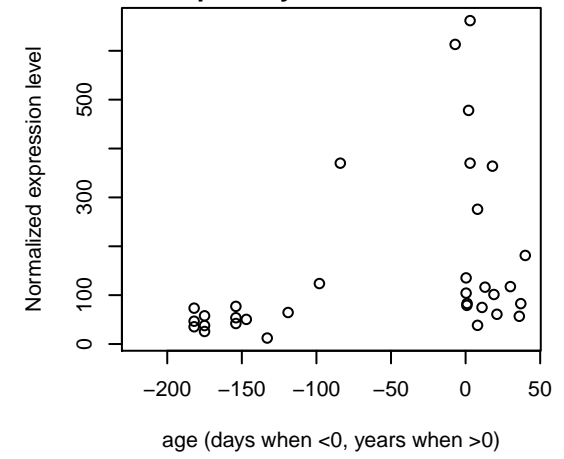

**IGFBP7\_57976042\_57976551**  
(P=0.3301, Diff = -18.48)  
primary visual cortex

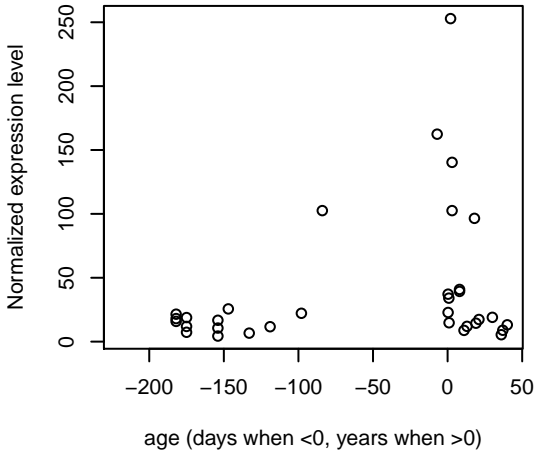

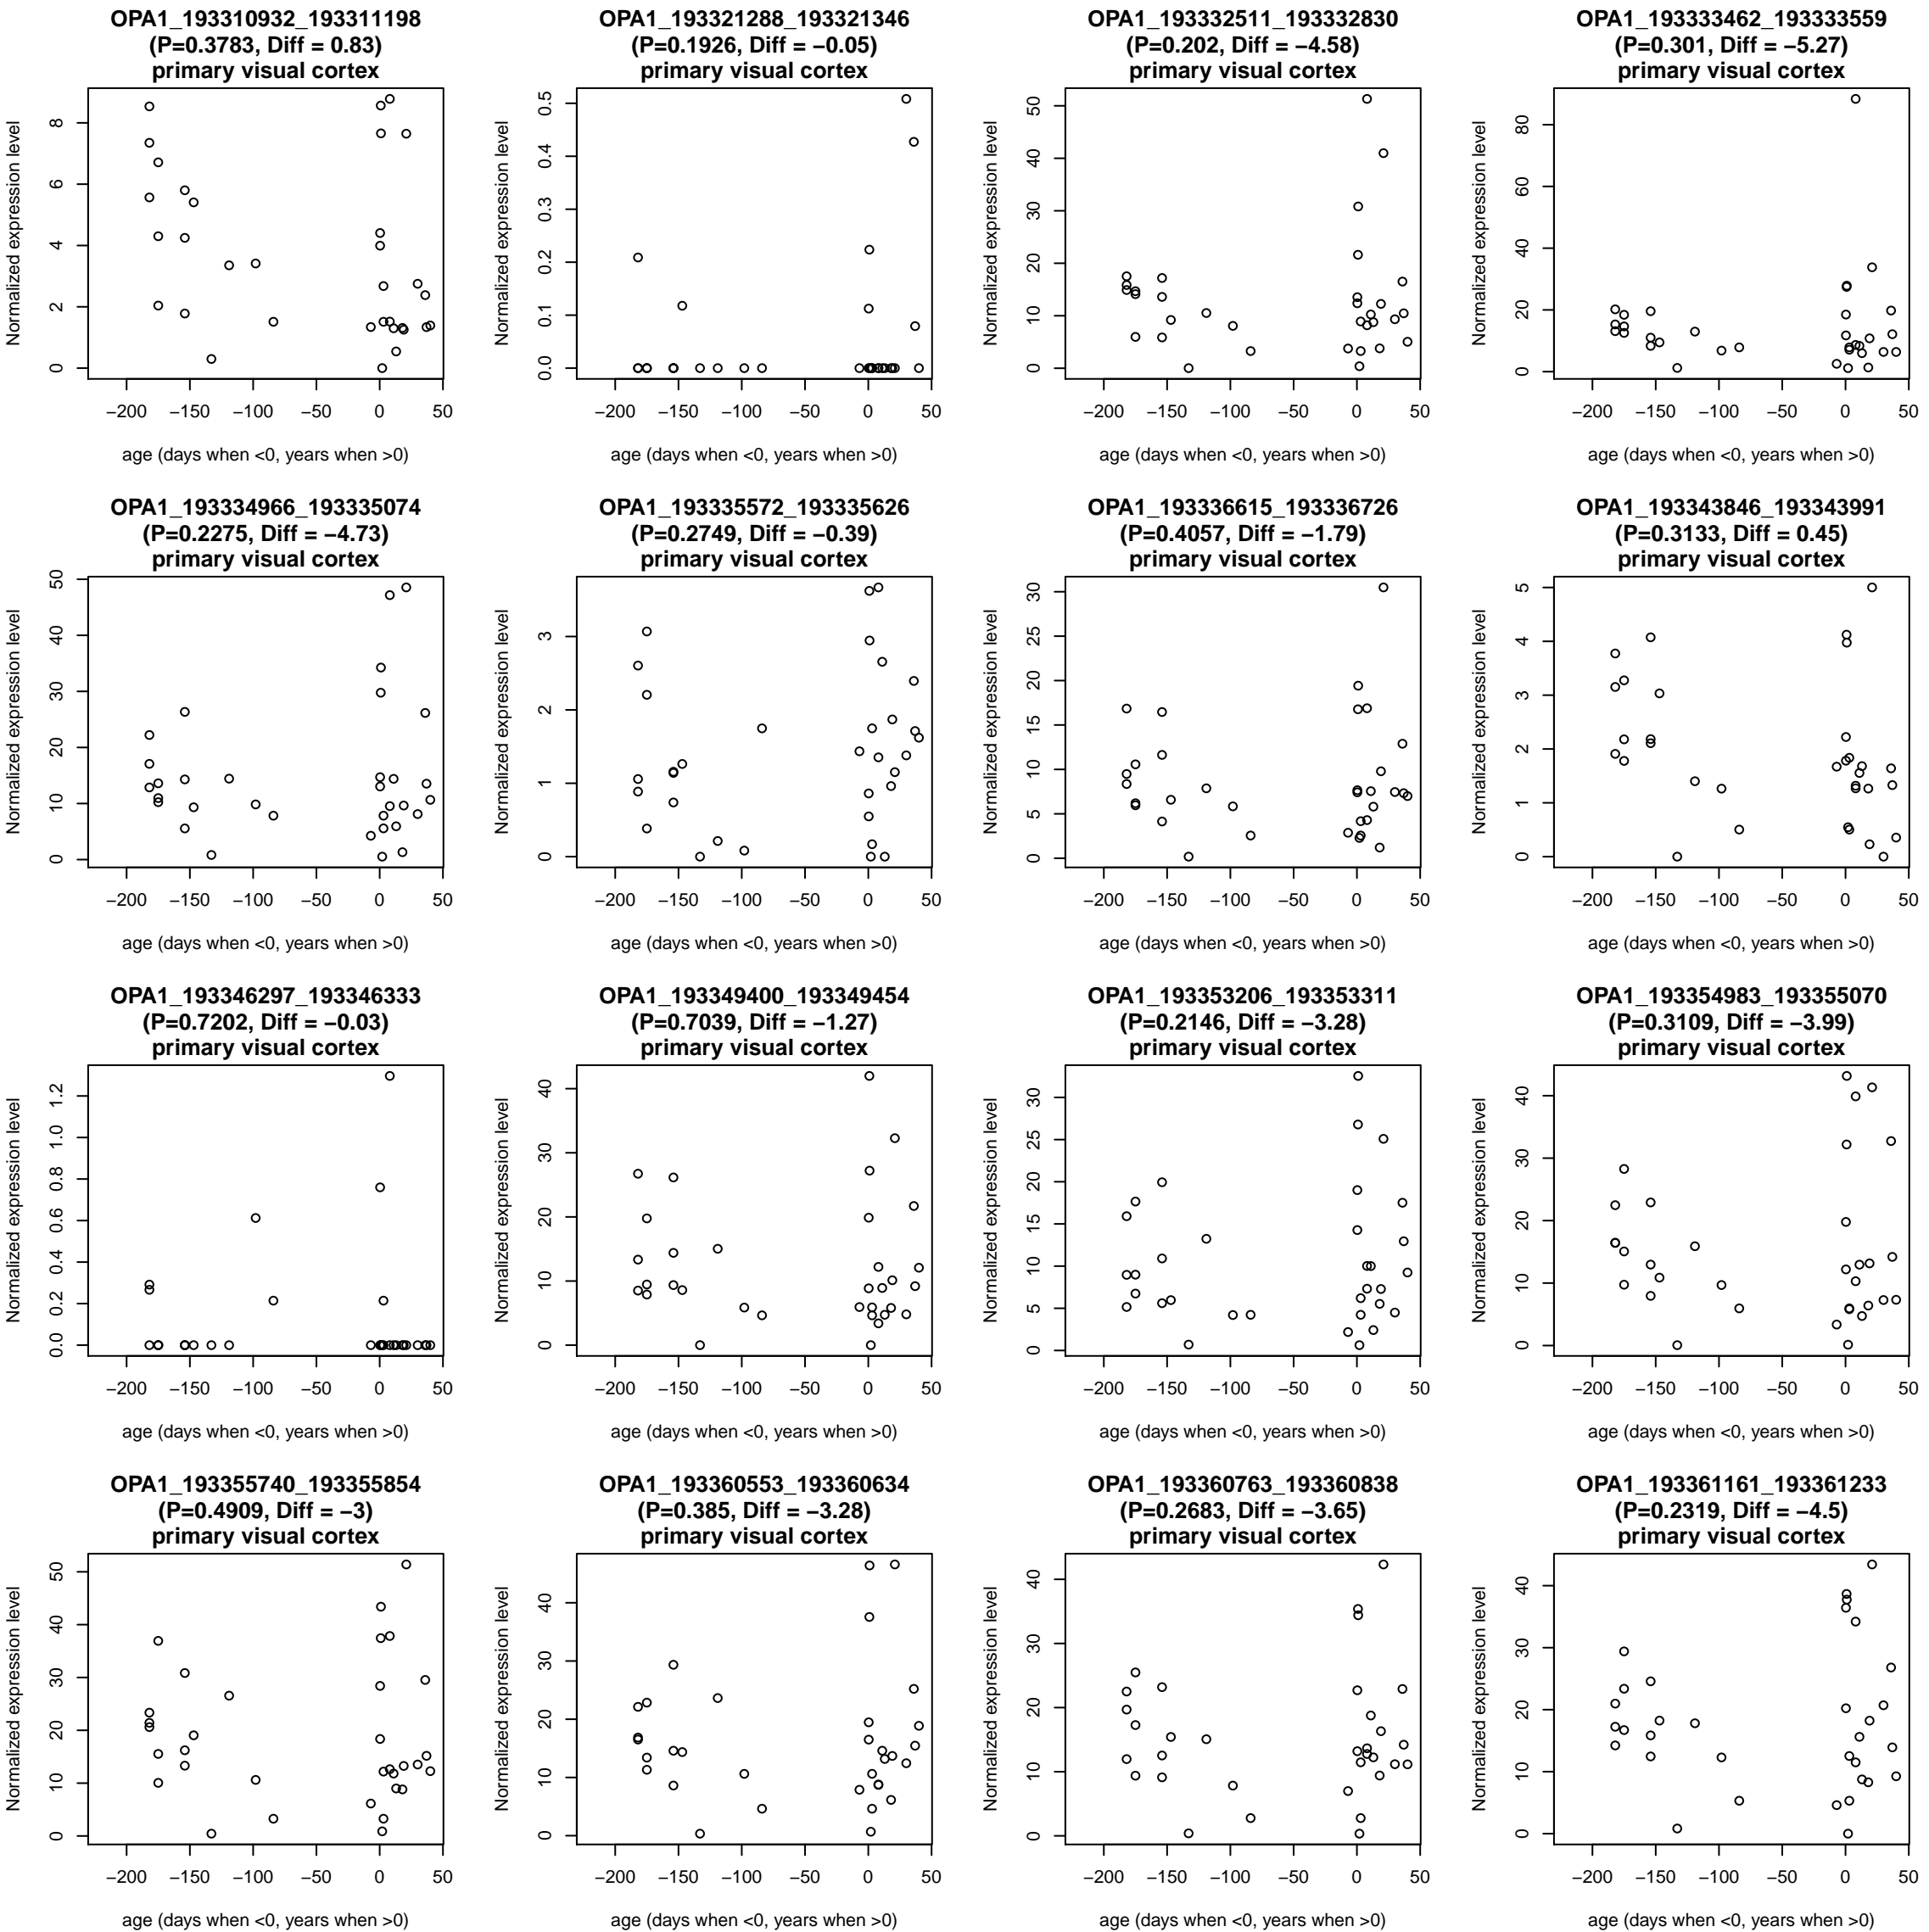



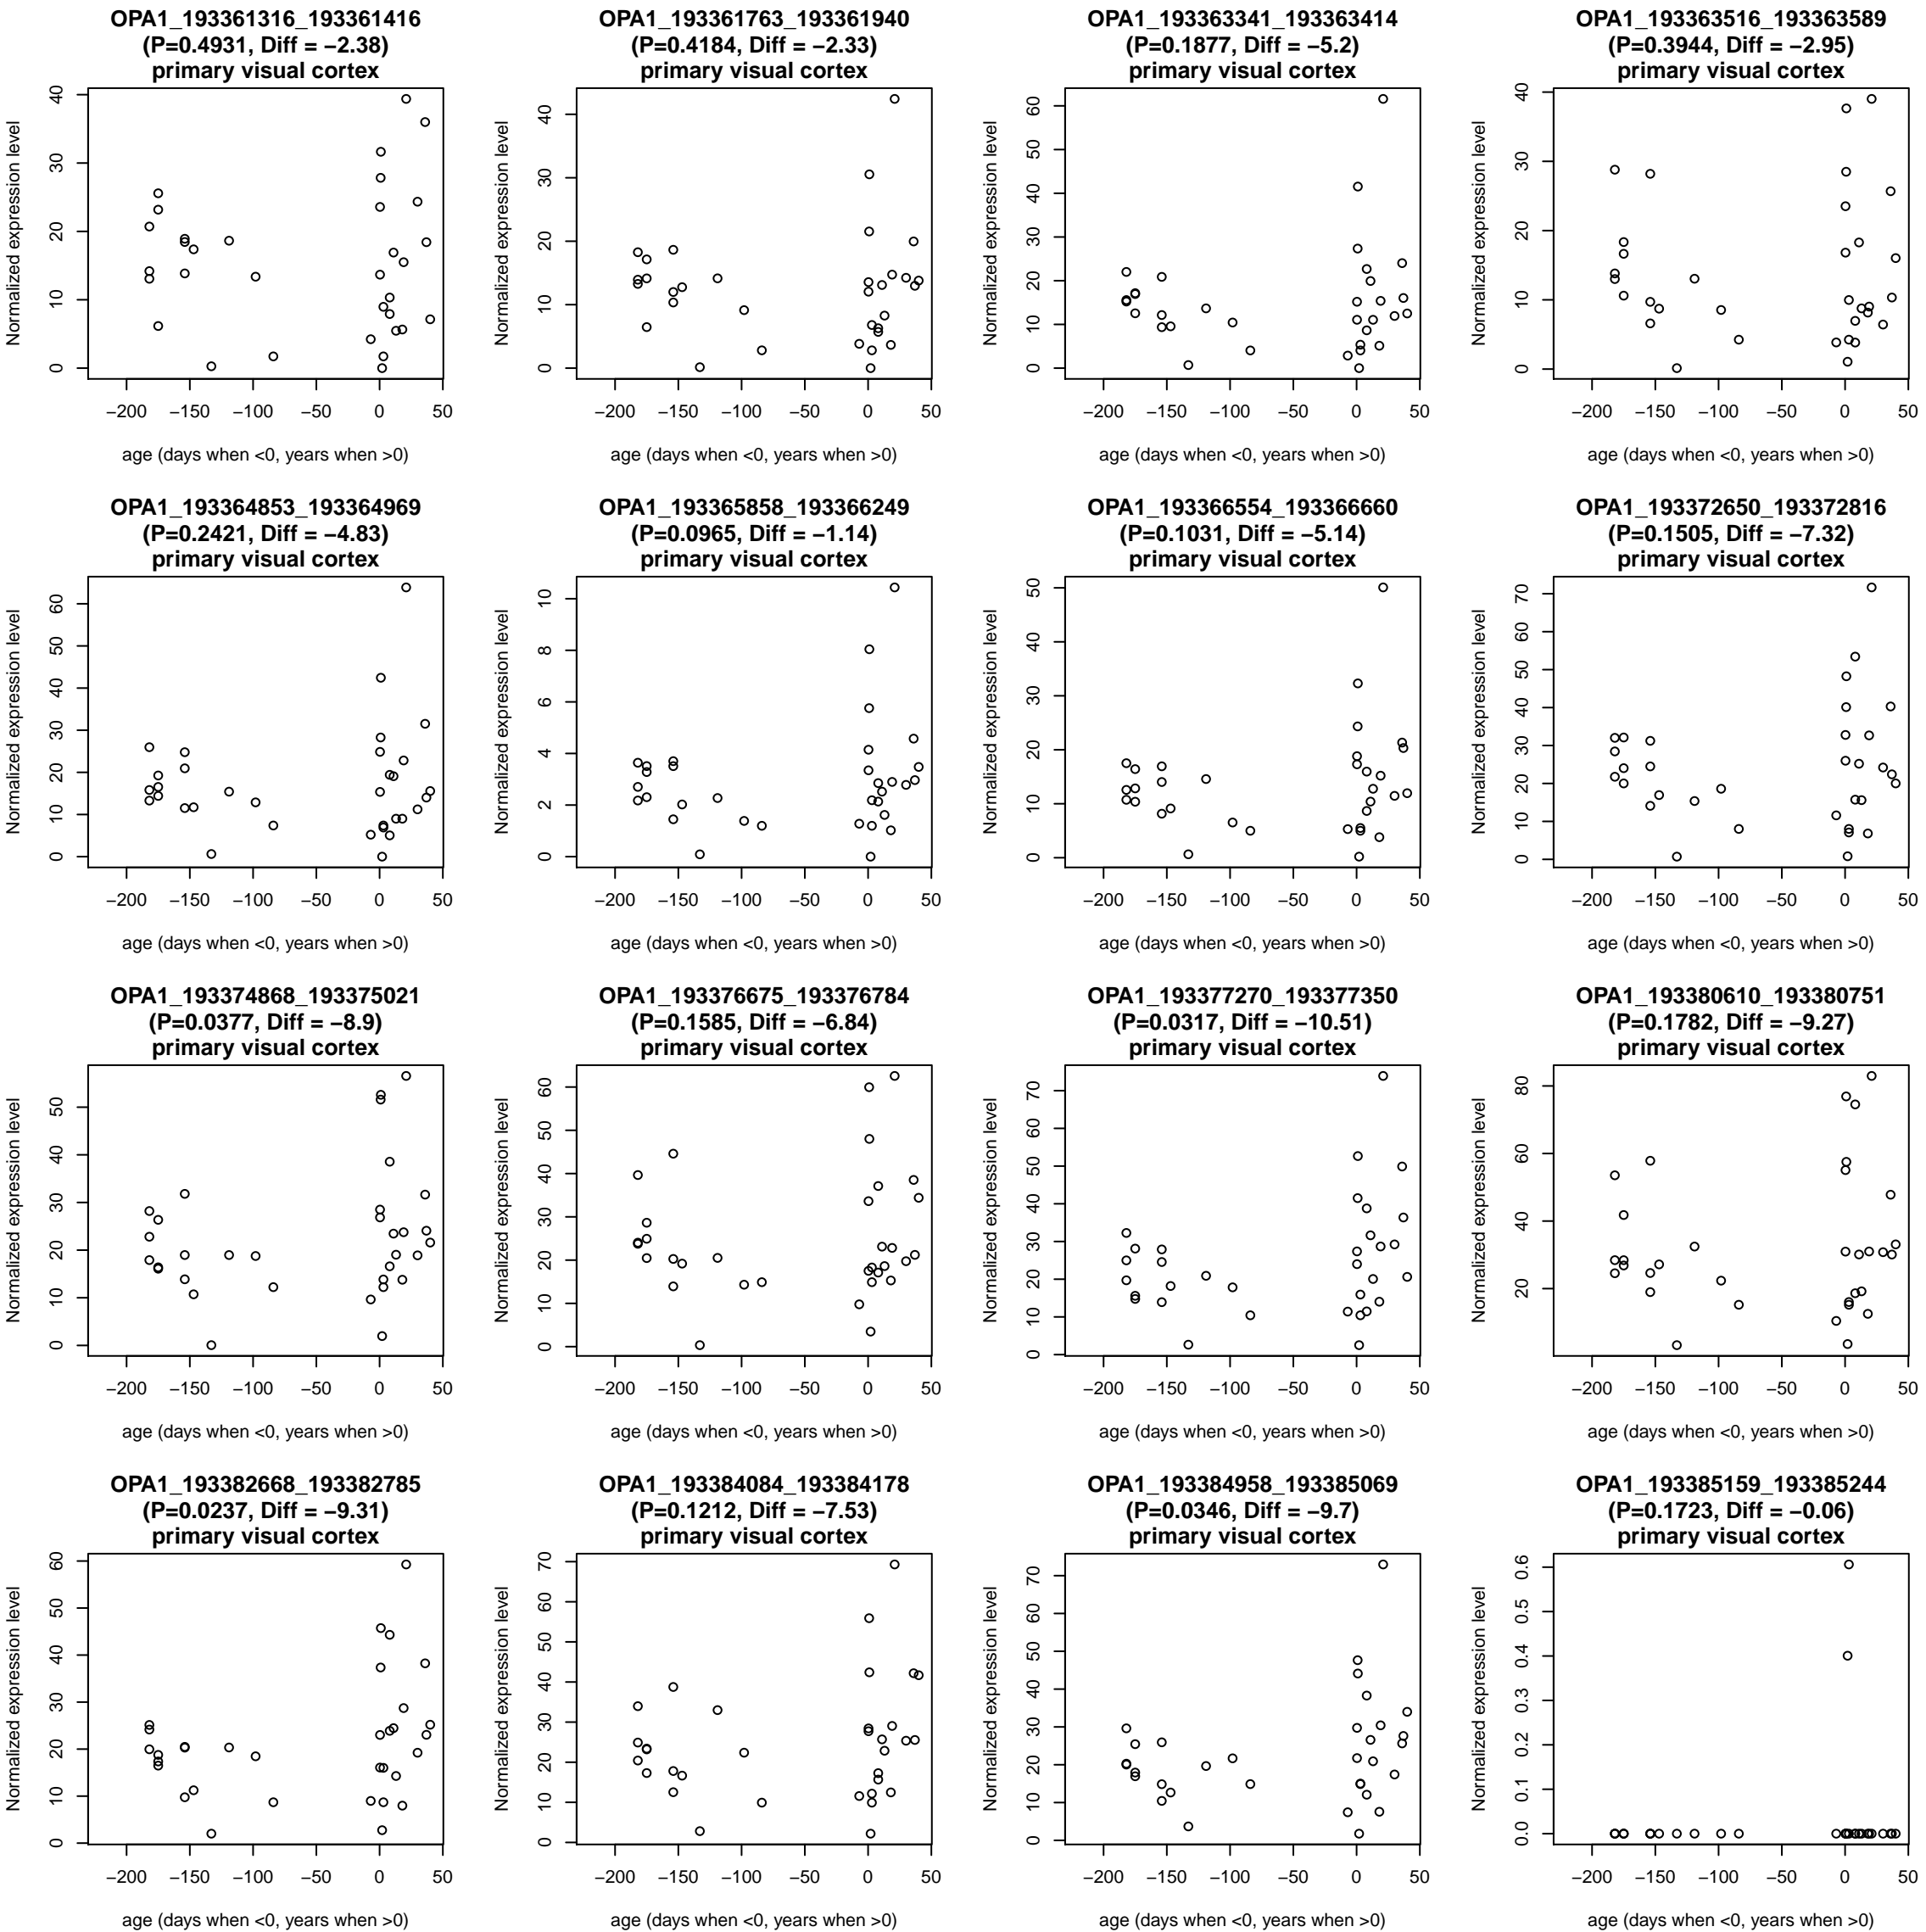

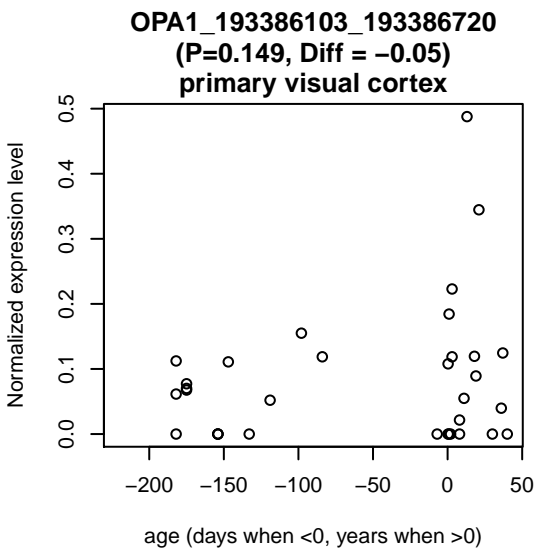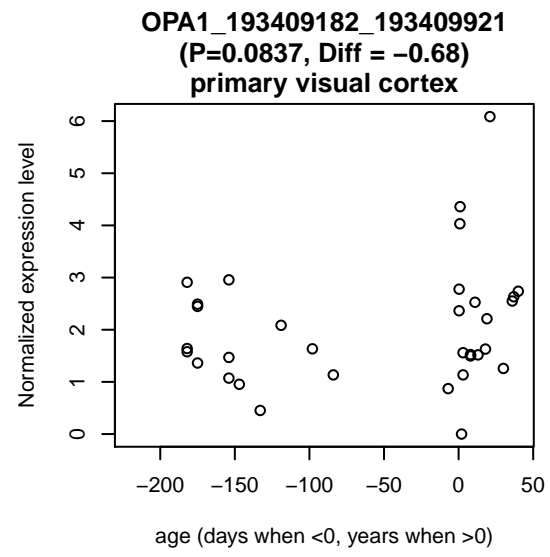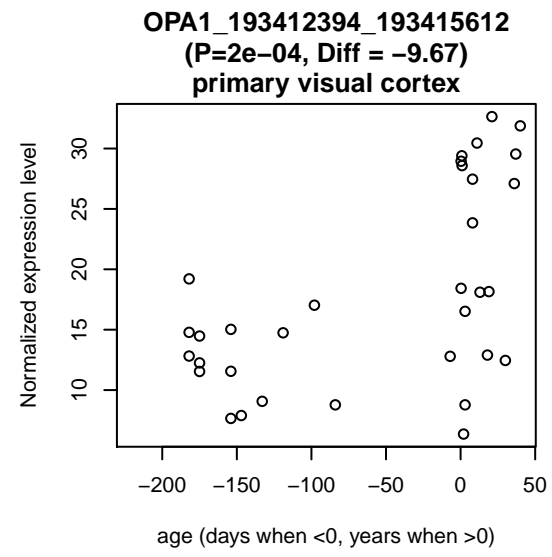

**ZMAT4\_40388108\_40389757**  
(P=0, Diff = -13.55)  
primary visual cortex

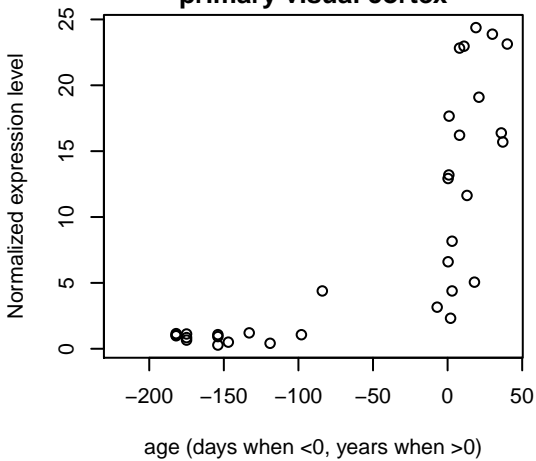

**ZMAT4\_40438683\_40438780**  
(P=0, Diff = -12.73)  
primary visual cortex

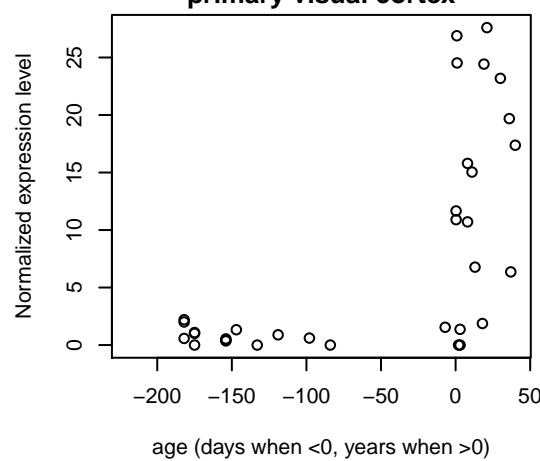

**ZMAT4\_40531882\_40532450**  
(P=1e-04, Diff = -3.34)  
primary visual cortex

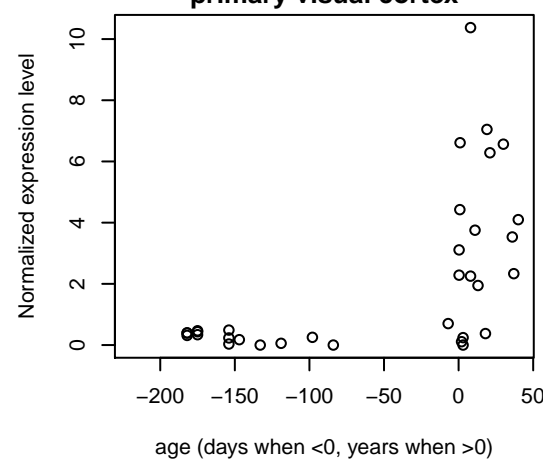

**ZMAT4\_40554514\_40554920**  
(P=5e-04, Diff = -3.64)  
primary visual cortex

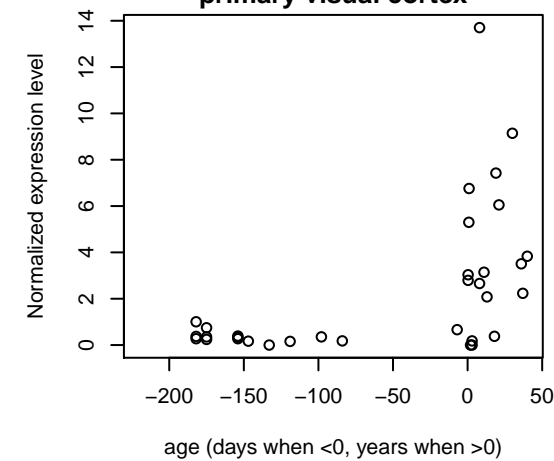

**ZMAT4\_40625159\_40625249**  
(P=4e-04, Diff = -9.48)  
primary visual cortex

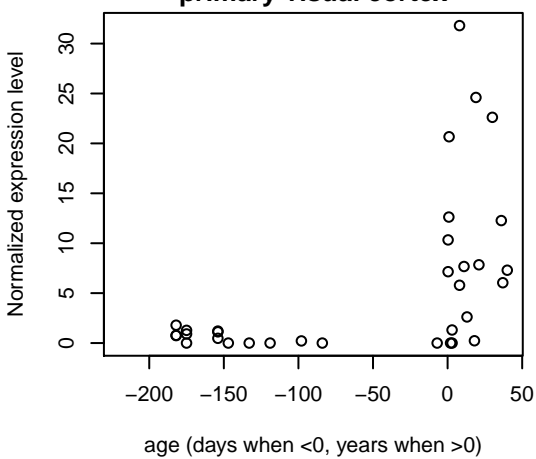

**ZMAT4\_40644207\_40644301**  
(P=0.007, Diff = -0.44)  
primary visual cortex

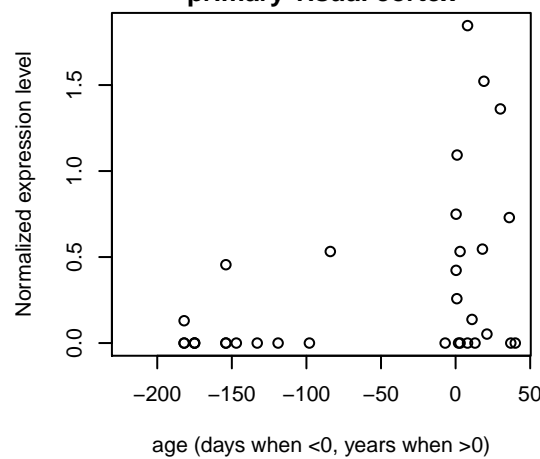

**ZMAT4\_40666027\_40666090**  
(P=0.1894, Diff = -0.09)  
primary visual cortex

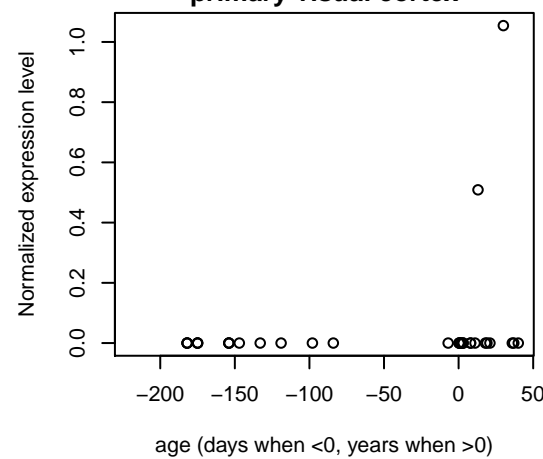

**ZMAT4\_40683093\_40683199**  
(P=6e-04, Diff = -7.91)  
primary visual cortex

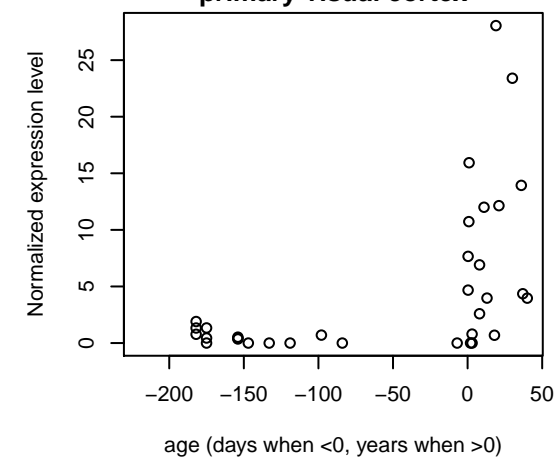

**ZMAT4\_40742047\_40742463**  
(P=2e-04, Diff = -0.58)  
primary visual cortex

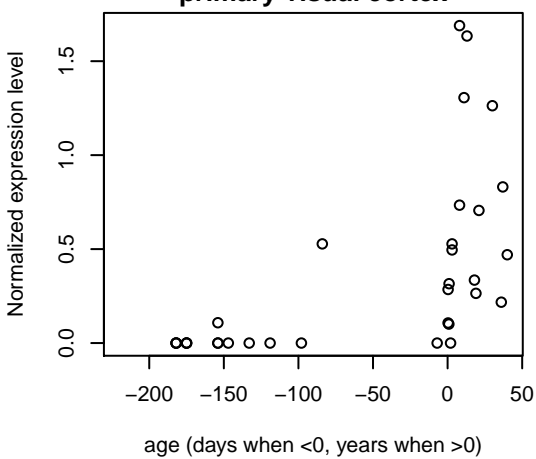

**ZMAT4\_40746013\_40746064**  
(P=0.4839, Diff = -0.03)  
primary visual cortex

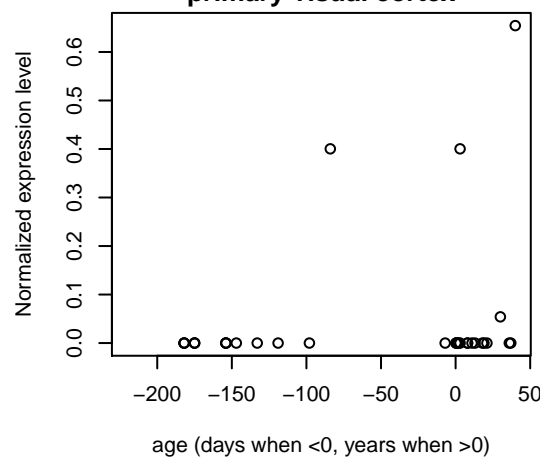

**ZMAT4\_40755201\_40755352**  
(P=0.0052, Diff = -2.15)  
primary visual cortex

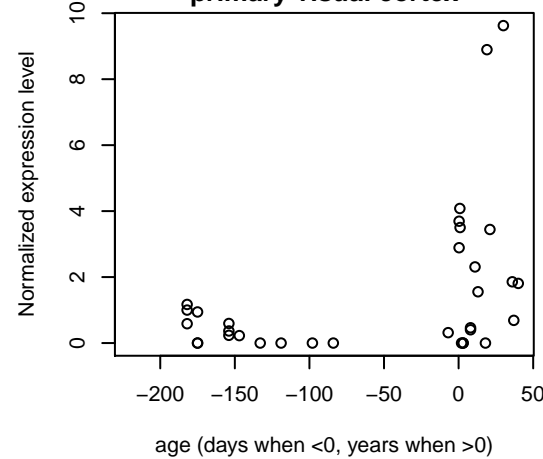

**CNDP1\_72201674\_72201926**  
( $P=9e-04$ , Diff =  $-5.81$ )  
primary visual cortex

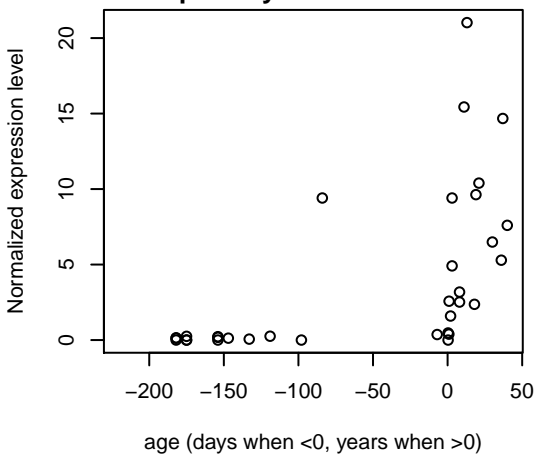

**CNDP1\_72223572\_72223701**  
( $P=1e-04$ , Diff =  $-15.59$ )  
primary visual cortex

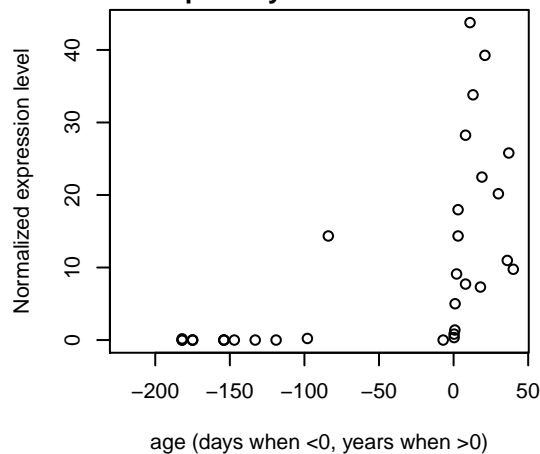

**CNDP1\_72226557\_72226707**  
( $P=4e-04$ , Diff =  $-17.69$ )  
primary visual cortex

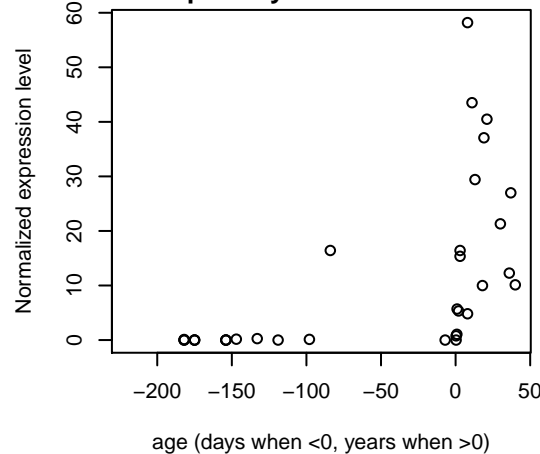

**CNDP1\_72228090\_72228253**  
( $P=2e-04$ , Diff =  $-25.01$ )  
primary visual cortex

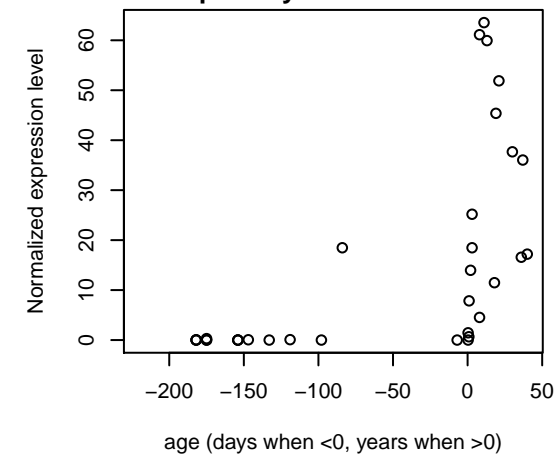

**CNDP1\_72229281\_72229370**  
( $P=0$ , Diff =  $-32.2$ )  
primary visual cortex

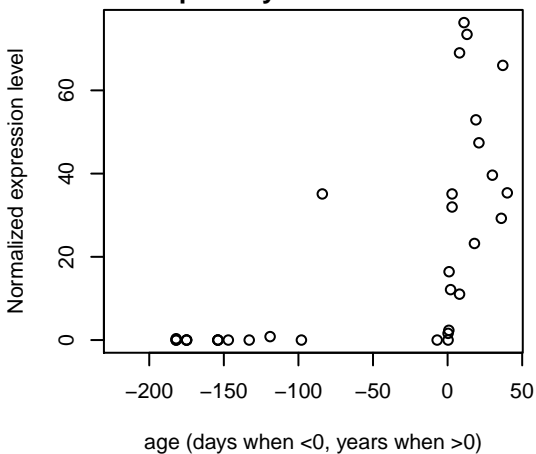

**CNDP1\_72234467\_72234668**  
( $P=1e-04$ , Diff =  $-40.54$ )  
primary visual cortex

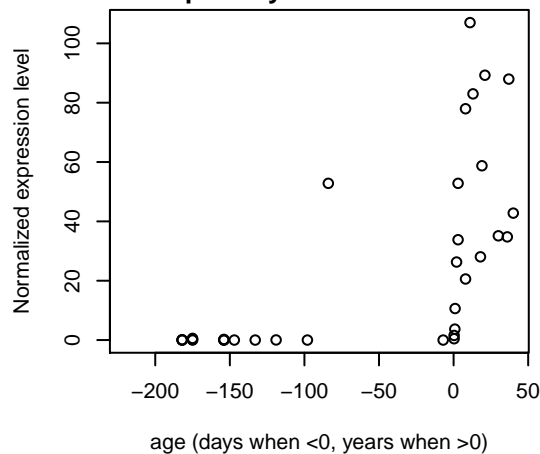

**CNDP1\_72238420\_72238505**  
( $P=3e-04$ , Diff =  $-39.6$ )  
primary visual cortex

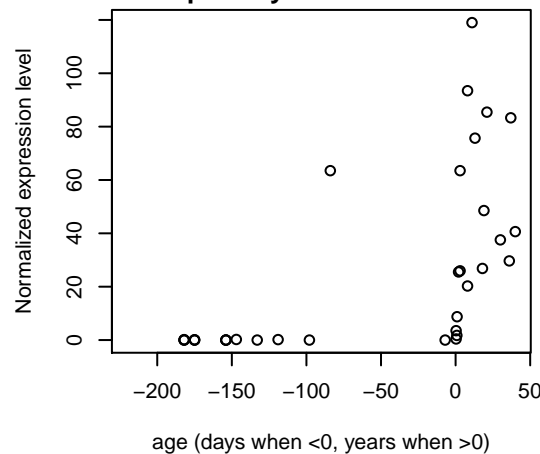

**CNDP1\_72244103\_72244264**  
( $P=5e-04$ , Diff =  $-33.31$ )  
primary visual cortex

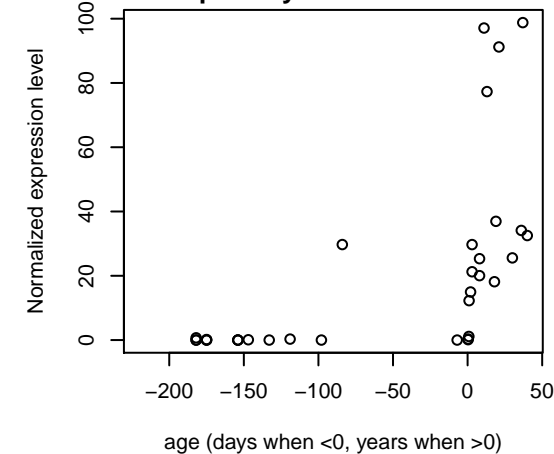

**CNDP1\_72245397\_72245562**  
( $P=3e-04$ , Diff =  $-43.66$ )  
primary visual cortex

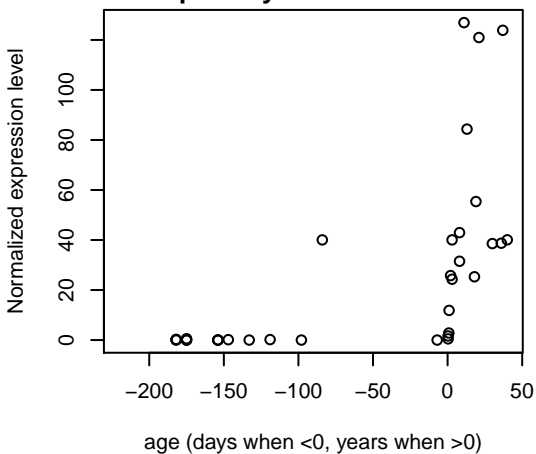

**CNDP1\_72247365\_72247507**  
( $P=3e-04$ , Diff =  $-56.49$ )  
primary visual cortex

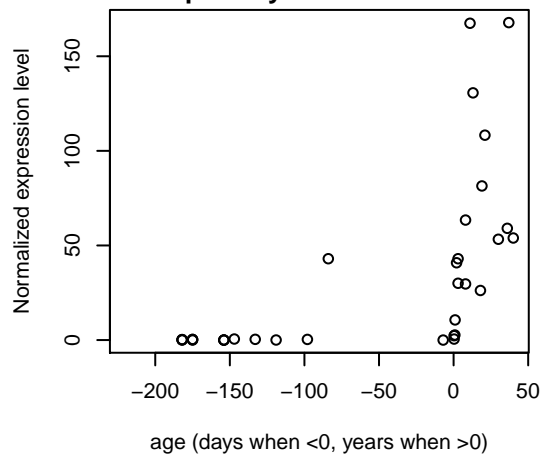

**CNDP1\_72250796\_72250944**  
( $P=2e-04$ , Diff =  $-49.23$ )  
primary visual cortex

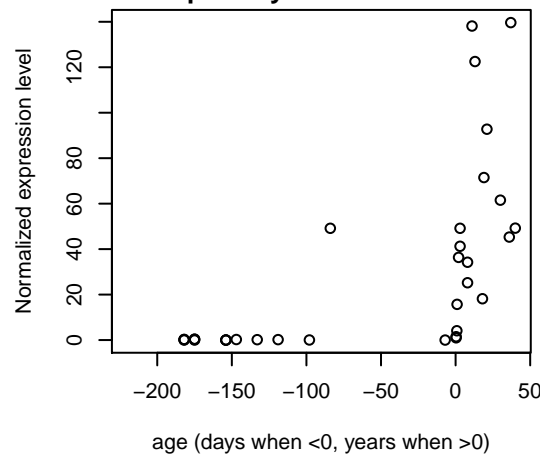

**CNDP1\_72251731\_72252261**  
( $P=3e-04$ , Diff =  $-35.39$ )  
primary visual cortex

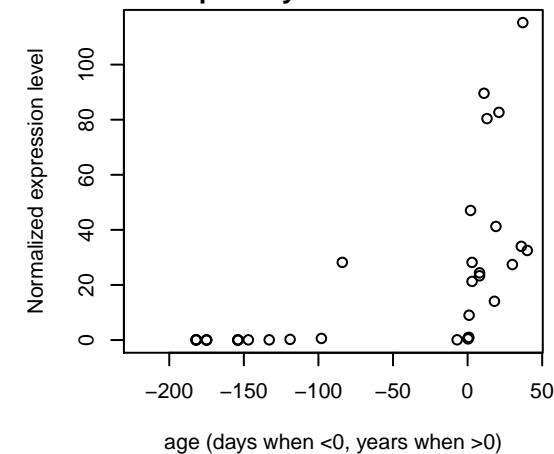

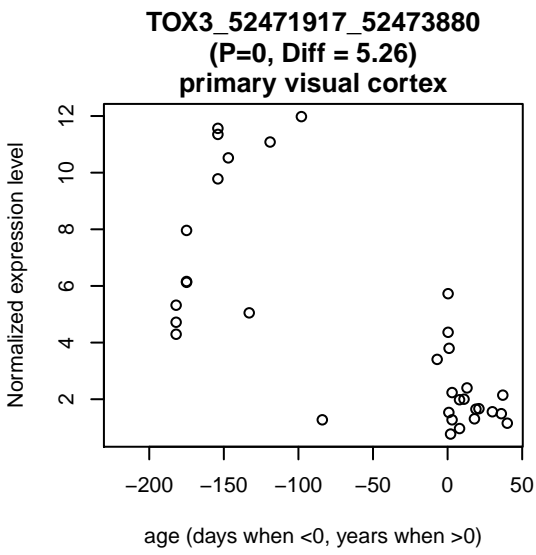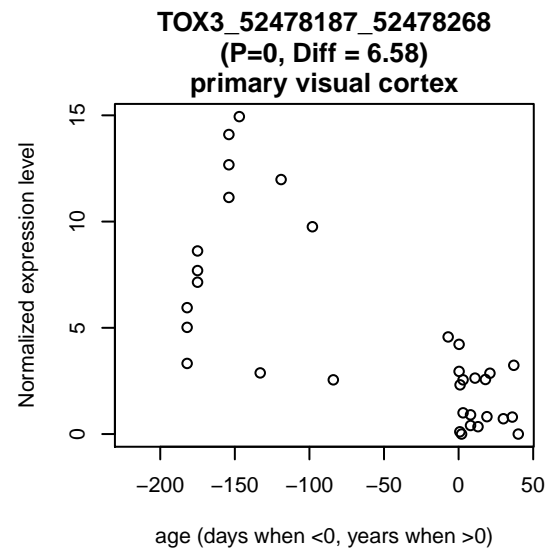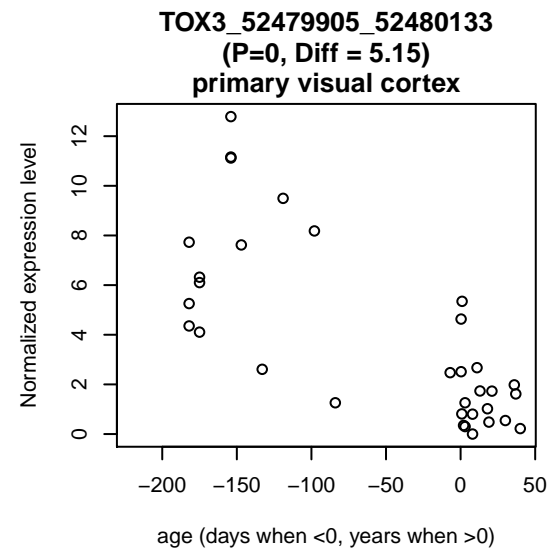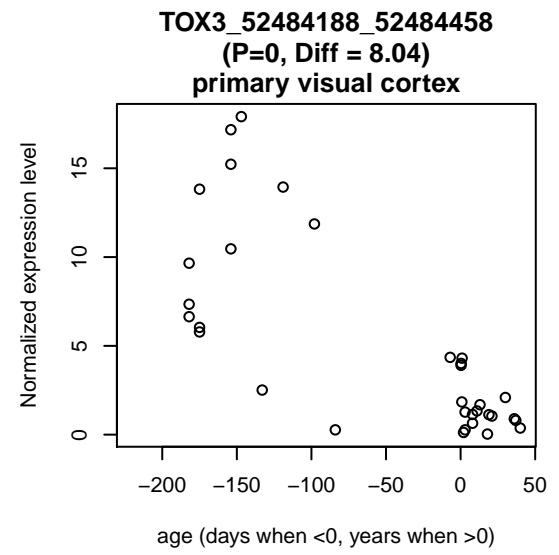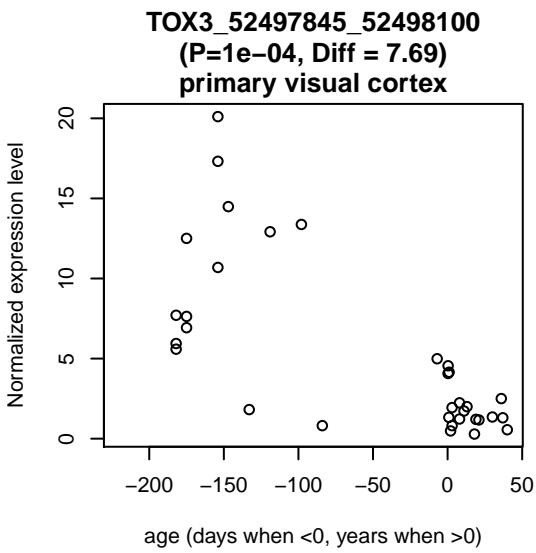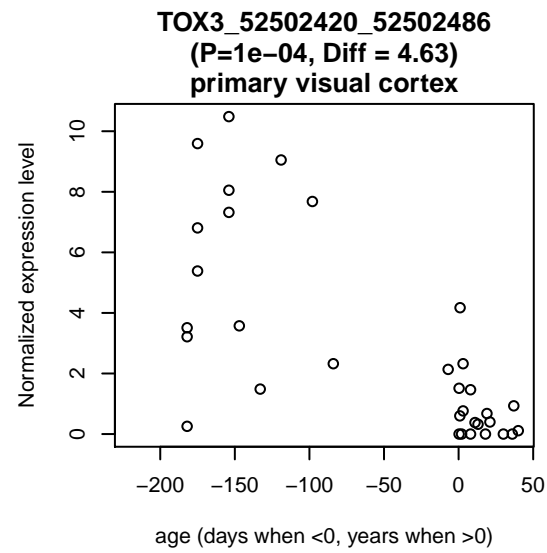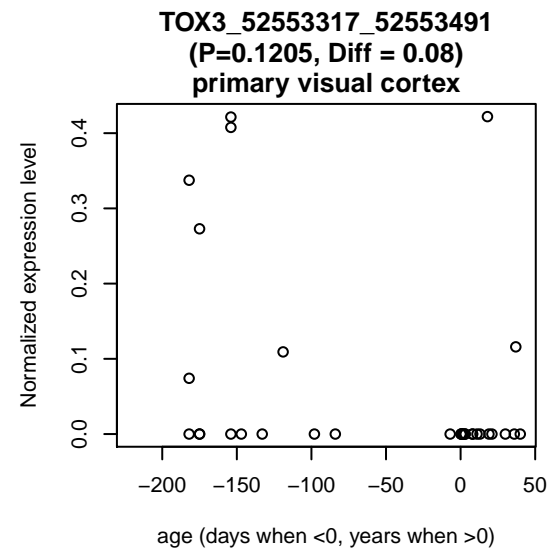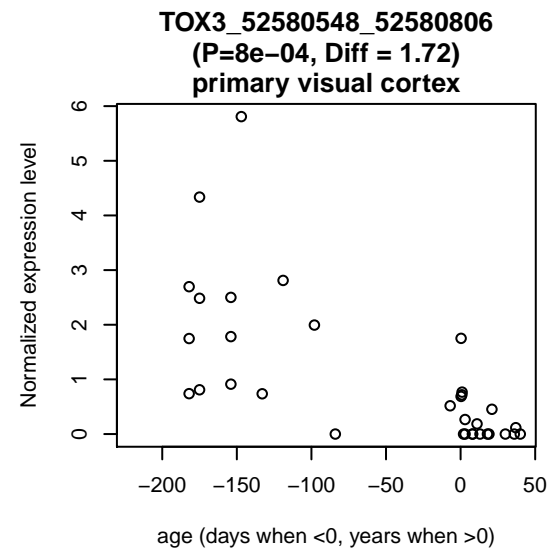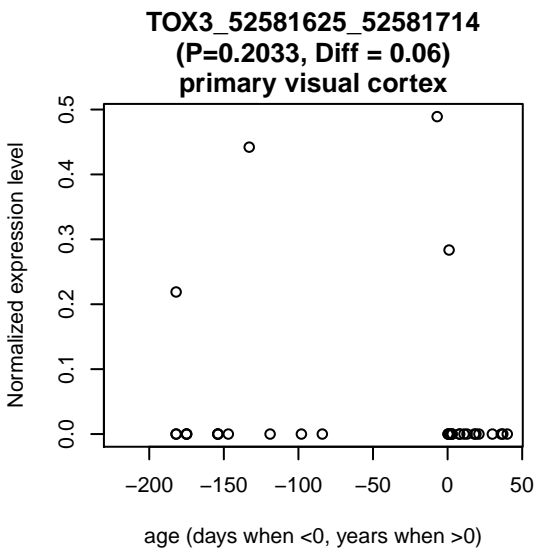

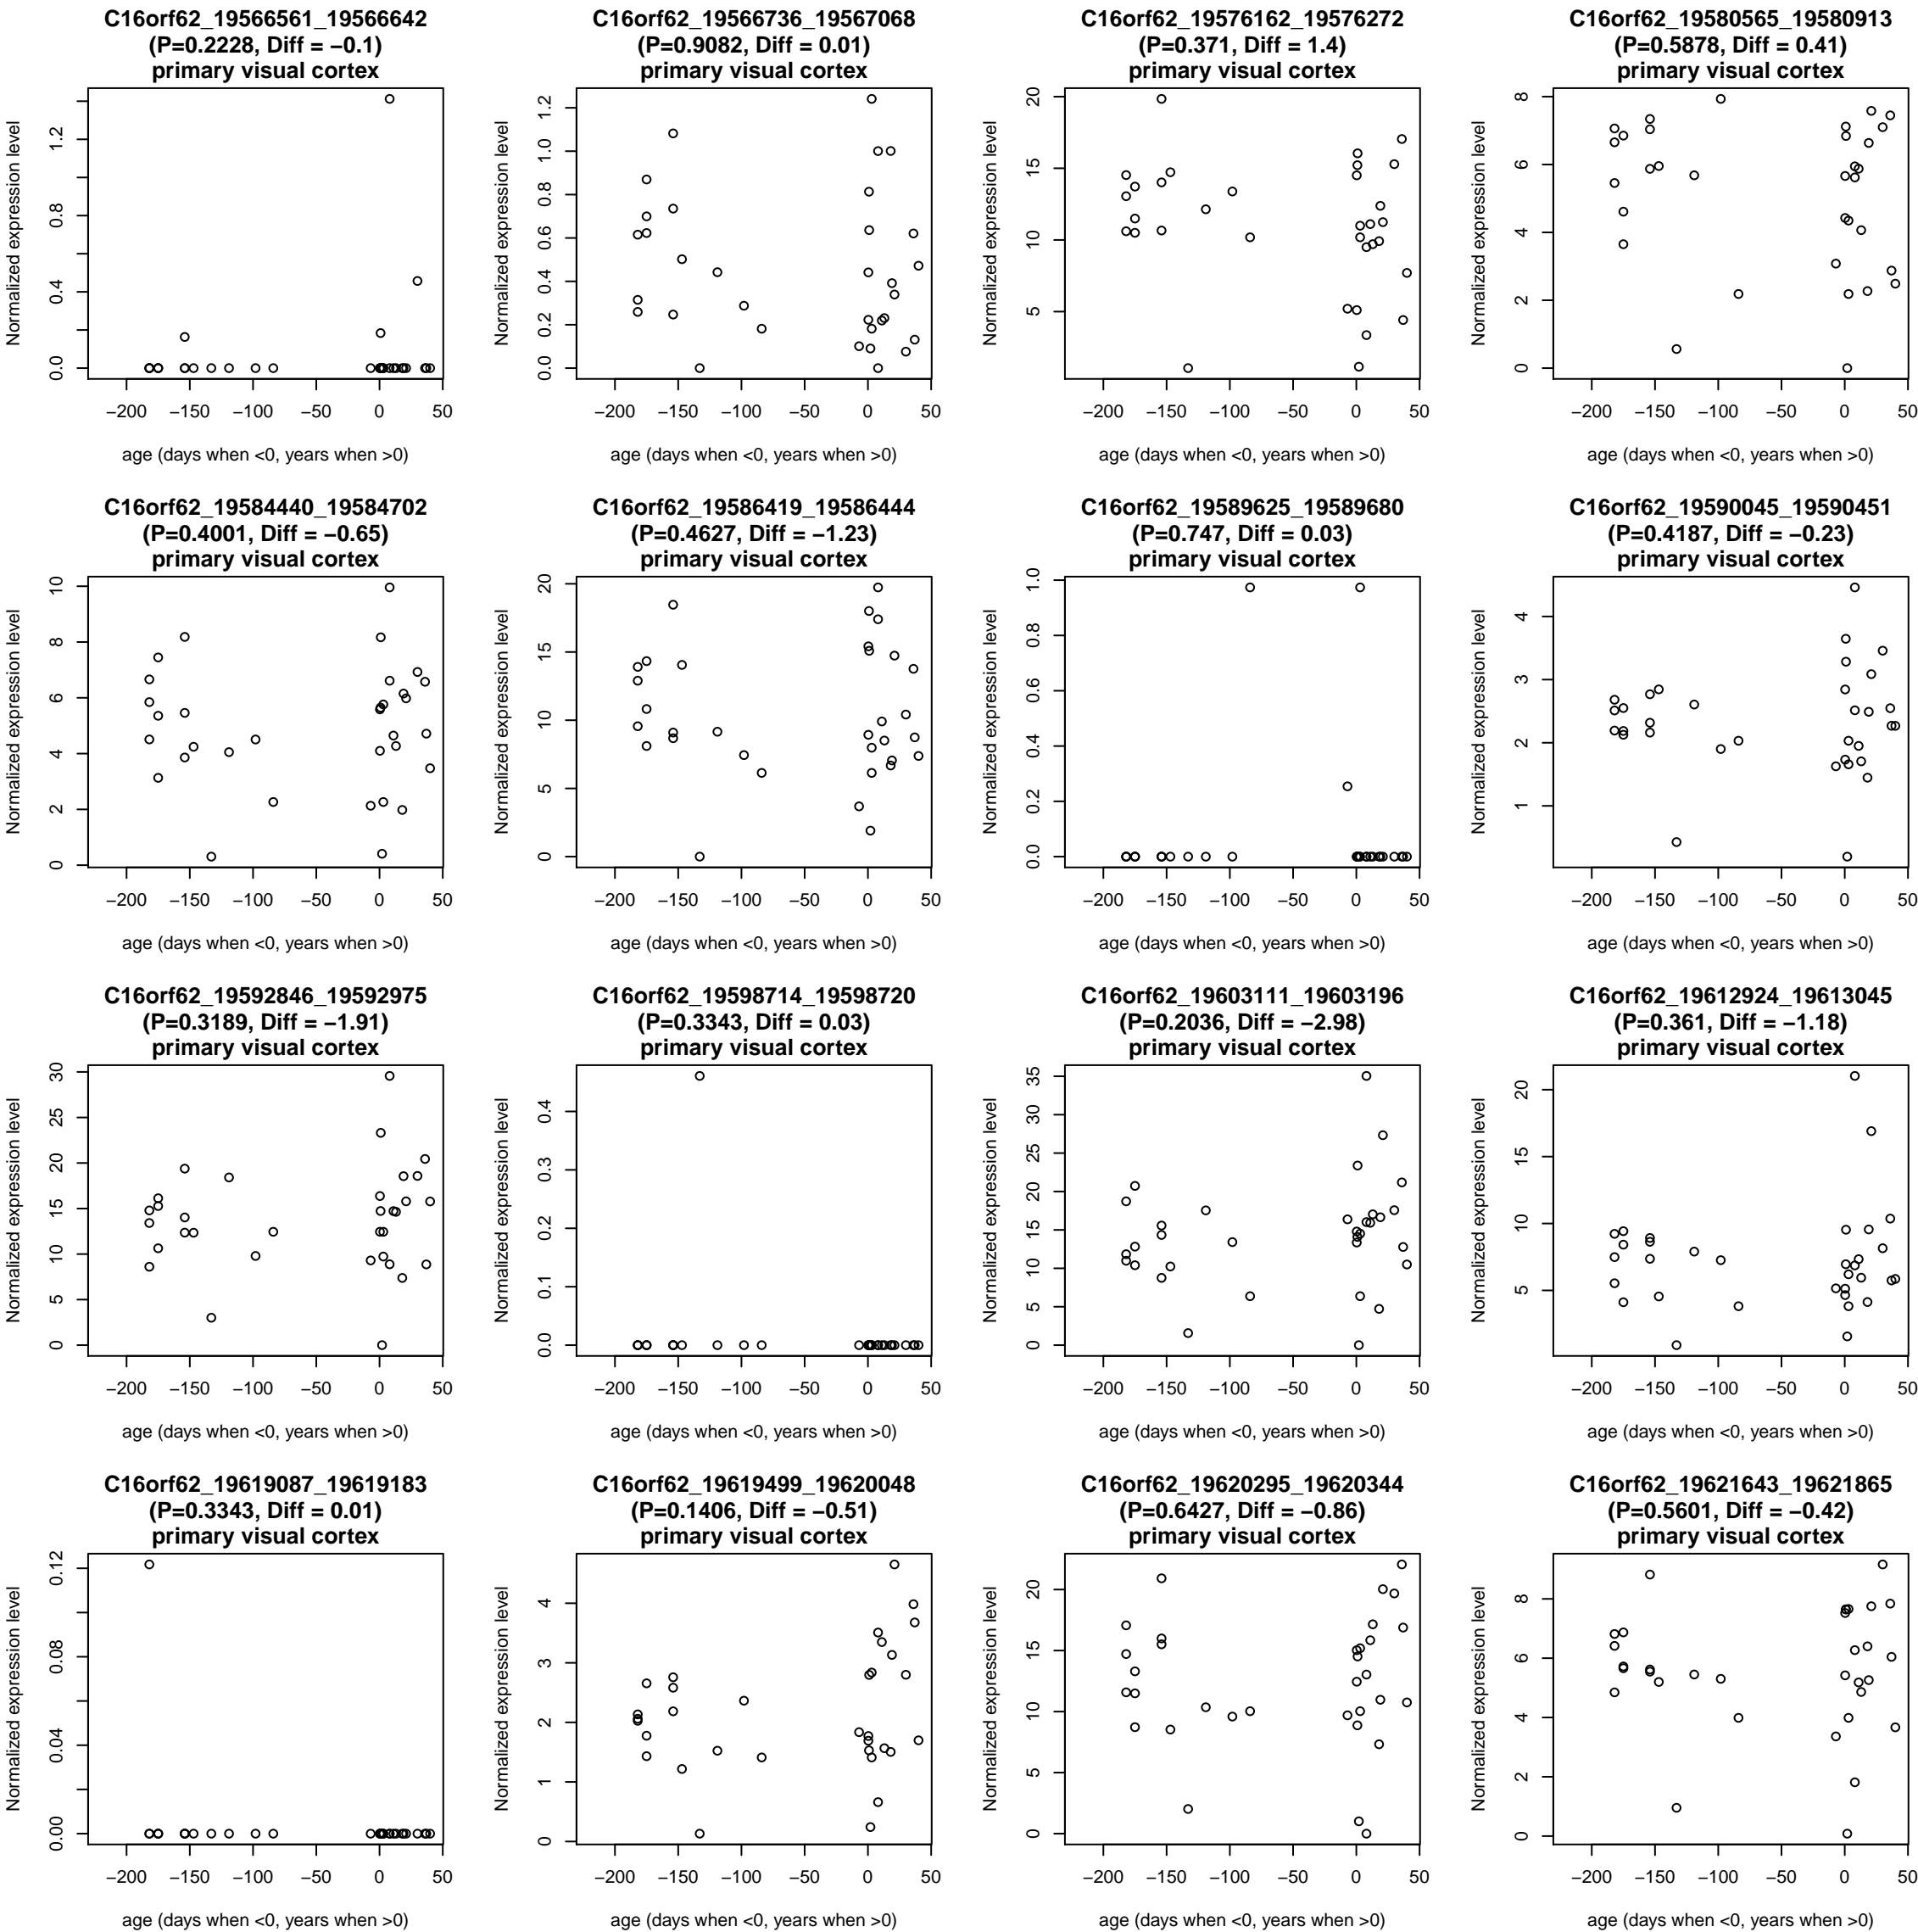

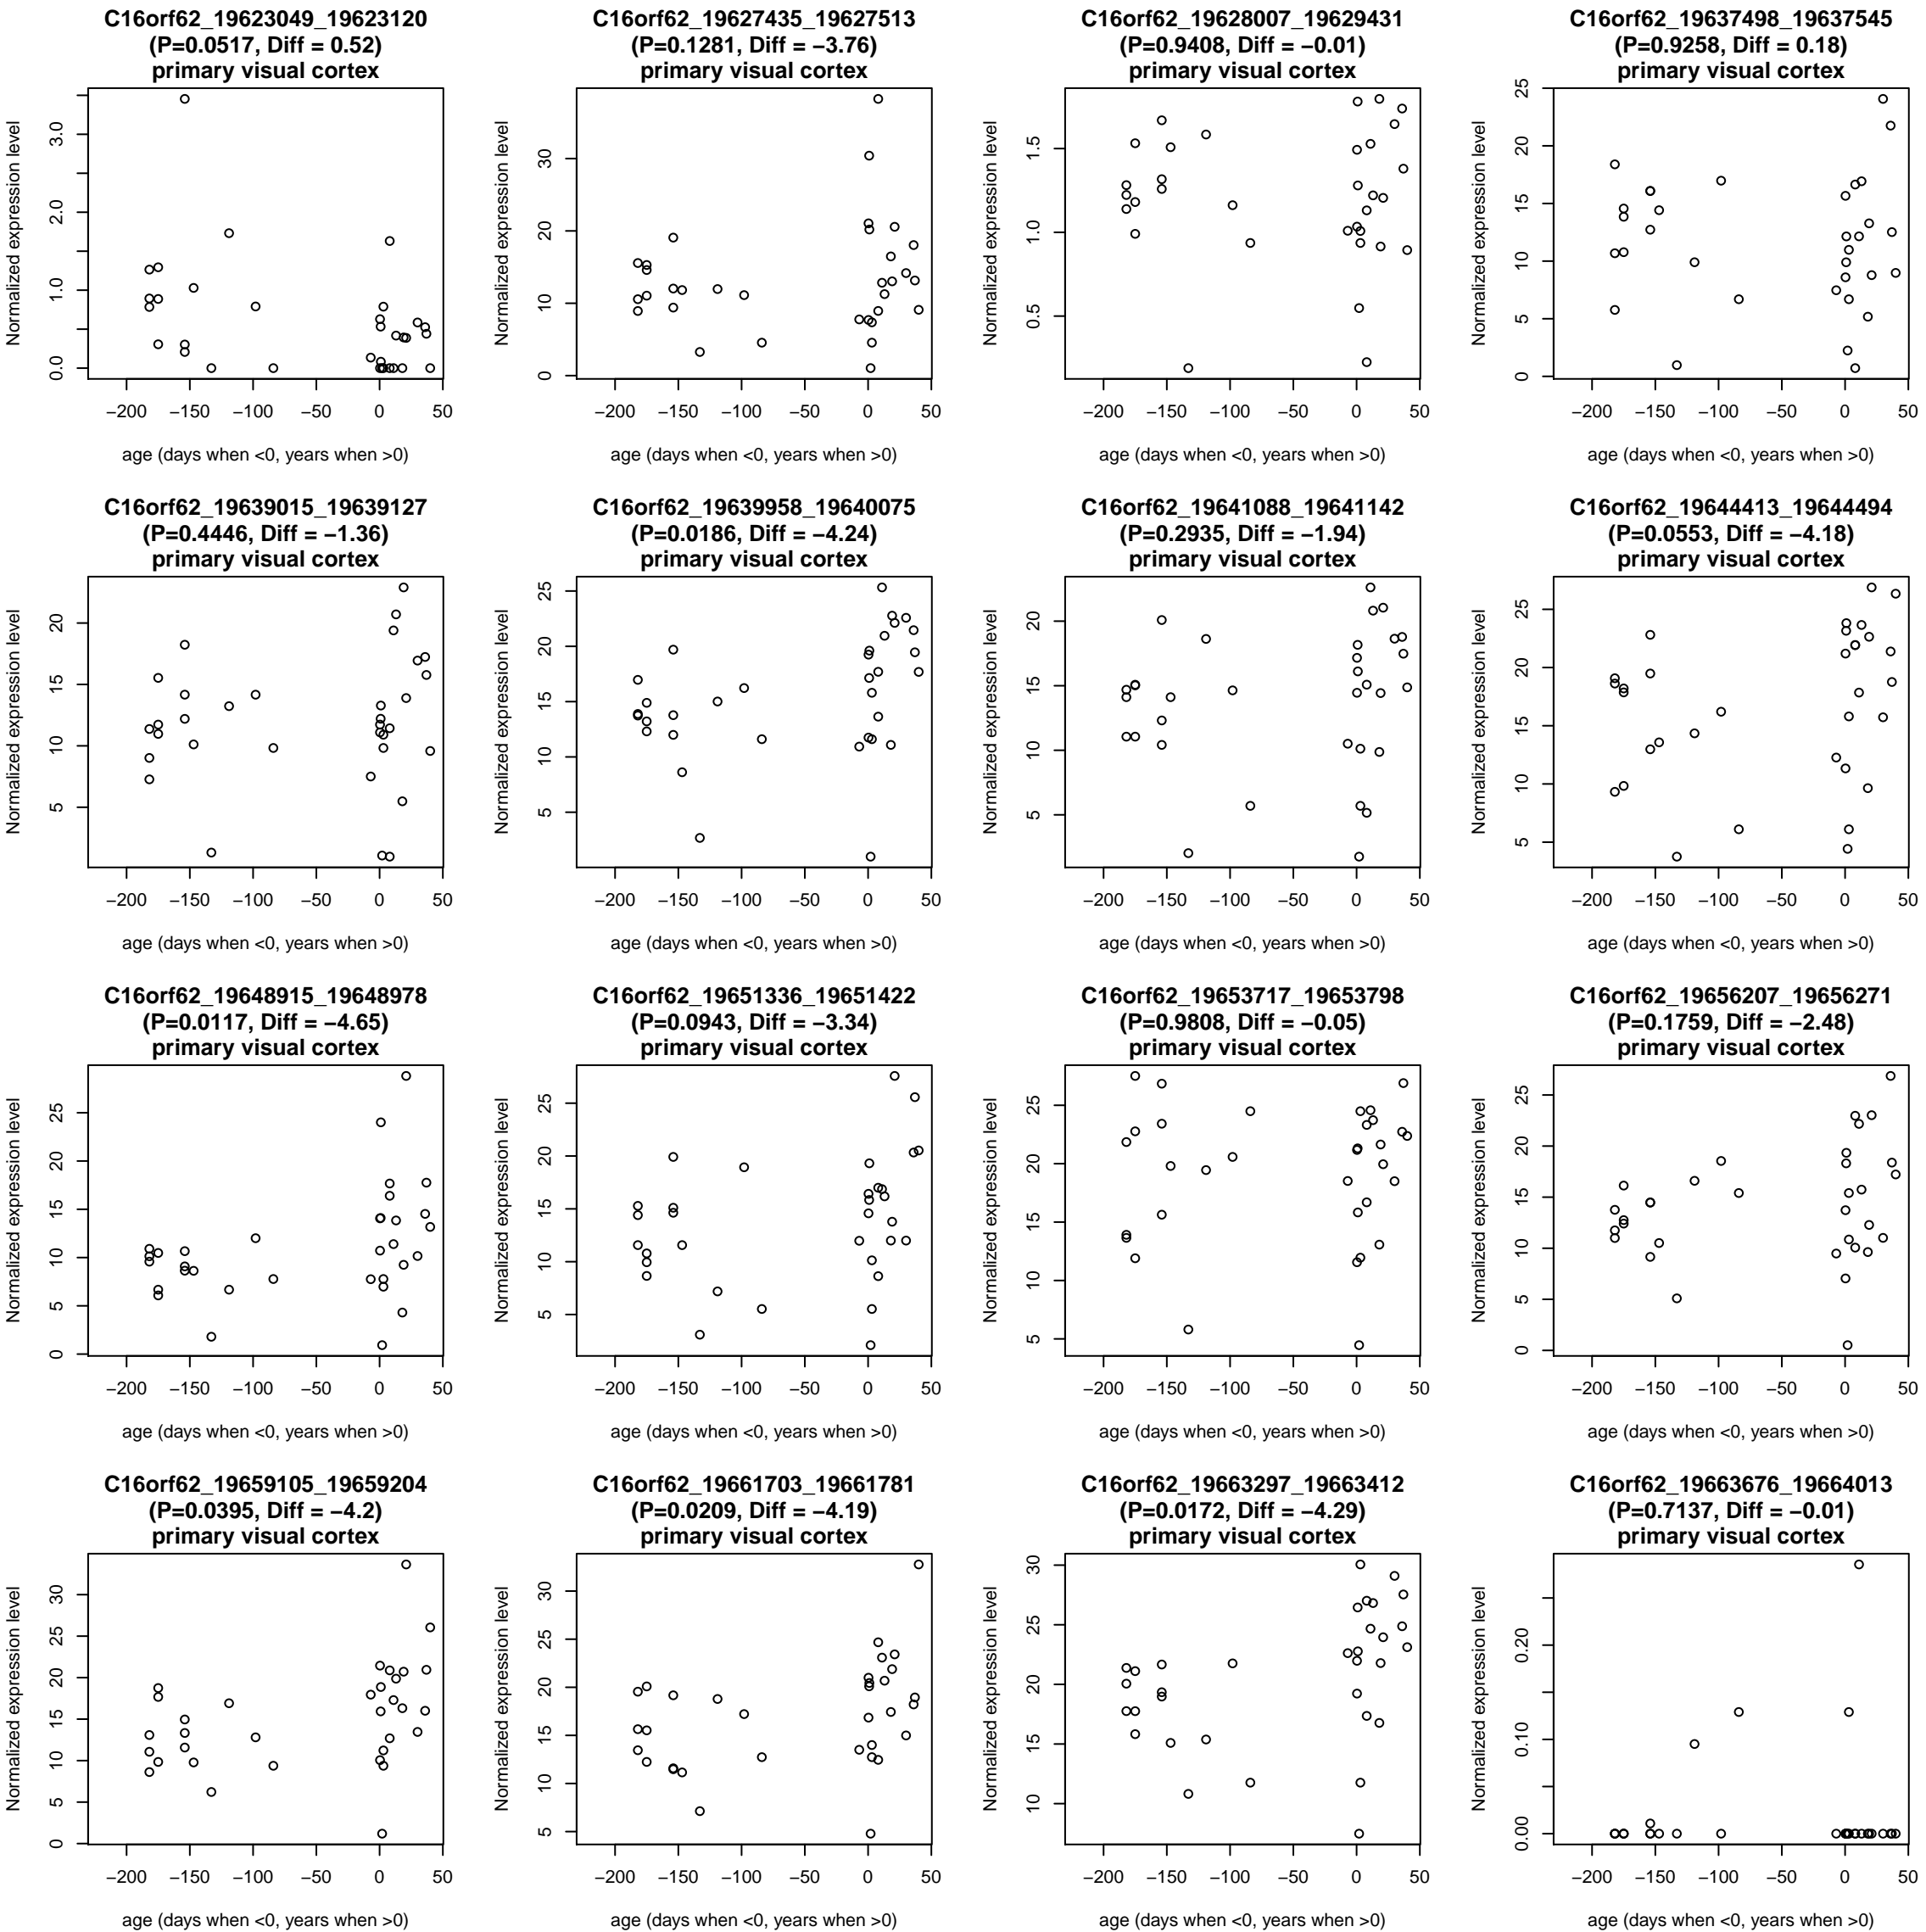

**C16orf62\_19680481\_19680621**  
(P=0.0099, Diff = -5.51)  
primary visual cortex

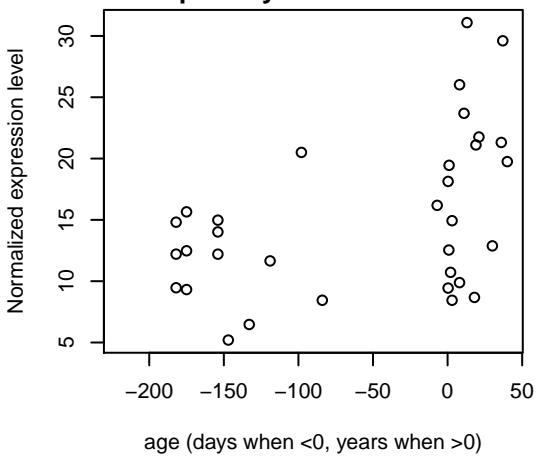

**C16orf62\_19693546\_19693712**  
(P=0.0447, Diff = -5.61)  
primary visual cortex

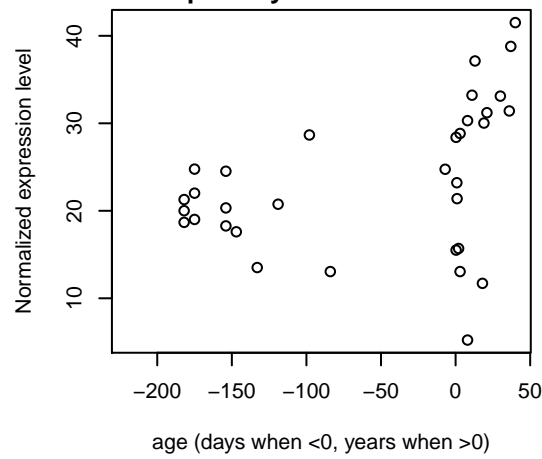

**C16orf62\_19702674\_19702793**  
(P=0.0131, Diff = -6.98)  
primary visual cortex

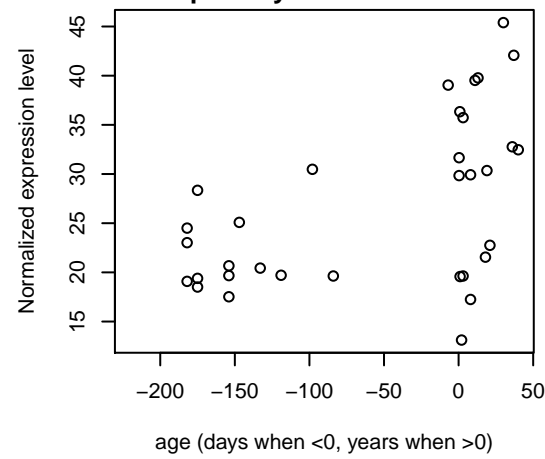

**C16orf62\_19710823\_19710970**  
(P=0.0367, Diff = -7.15)  
primary visual cortex

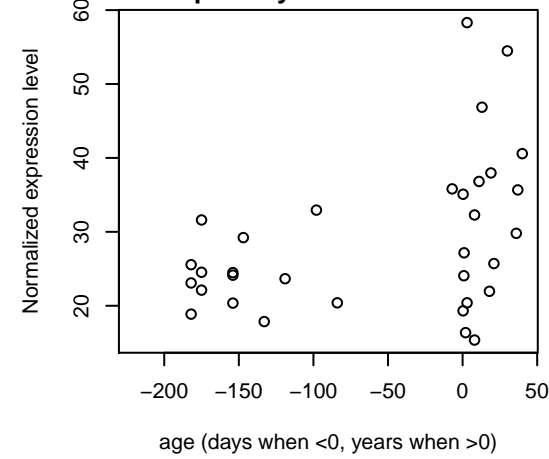

**C16orf62\_19711699\_19712448**  
(P=0.0052, Diff = -3.52)  
primary visual cortex

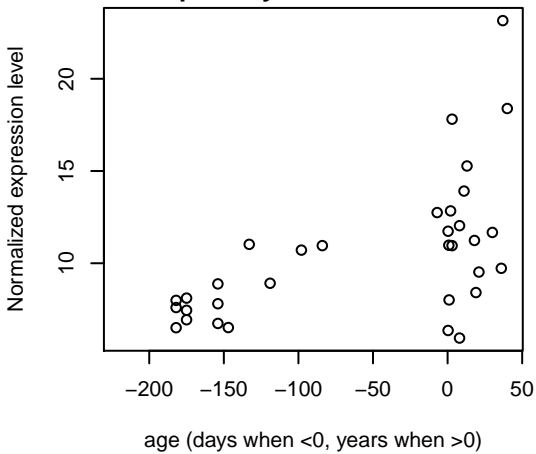

**C16orf62\_19716437\_19716880**  
(P=0, Diff = 2.04)  
primary visual cortex

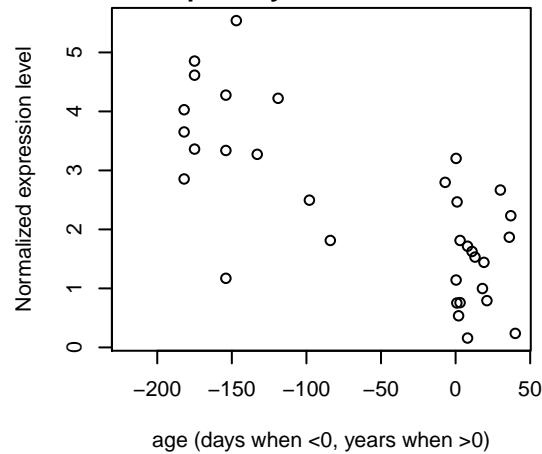



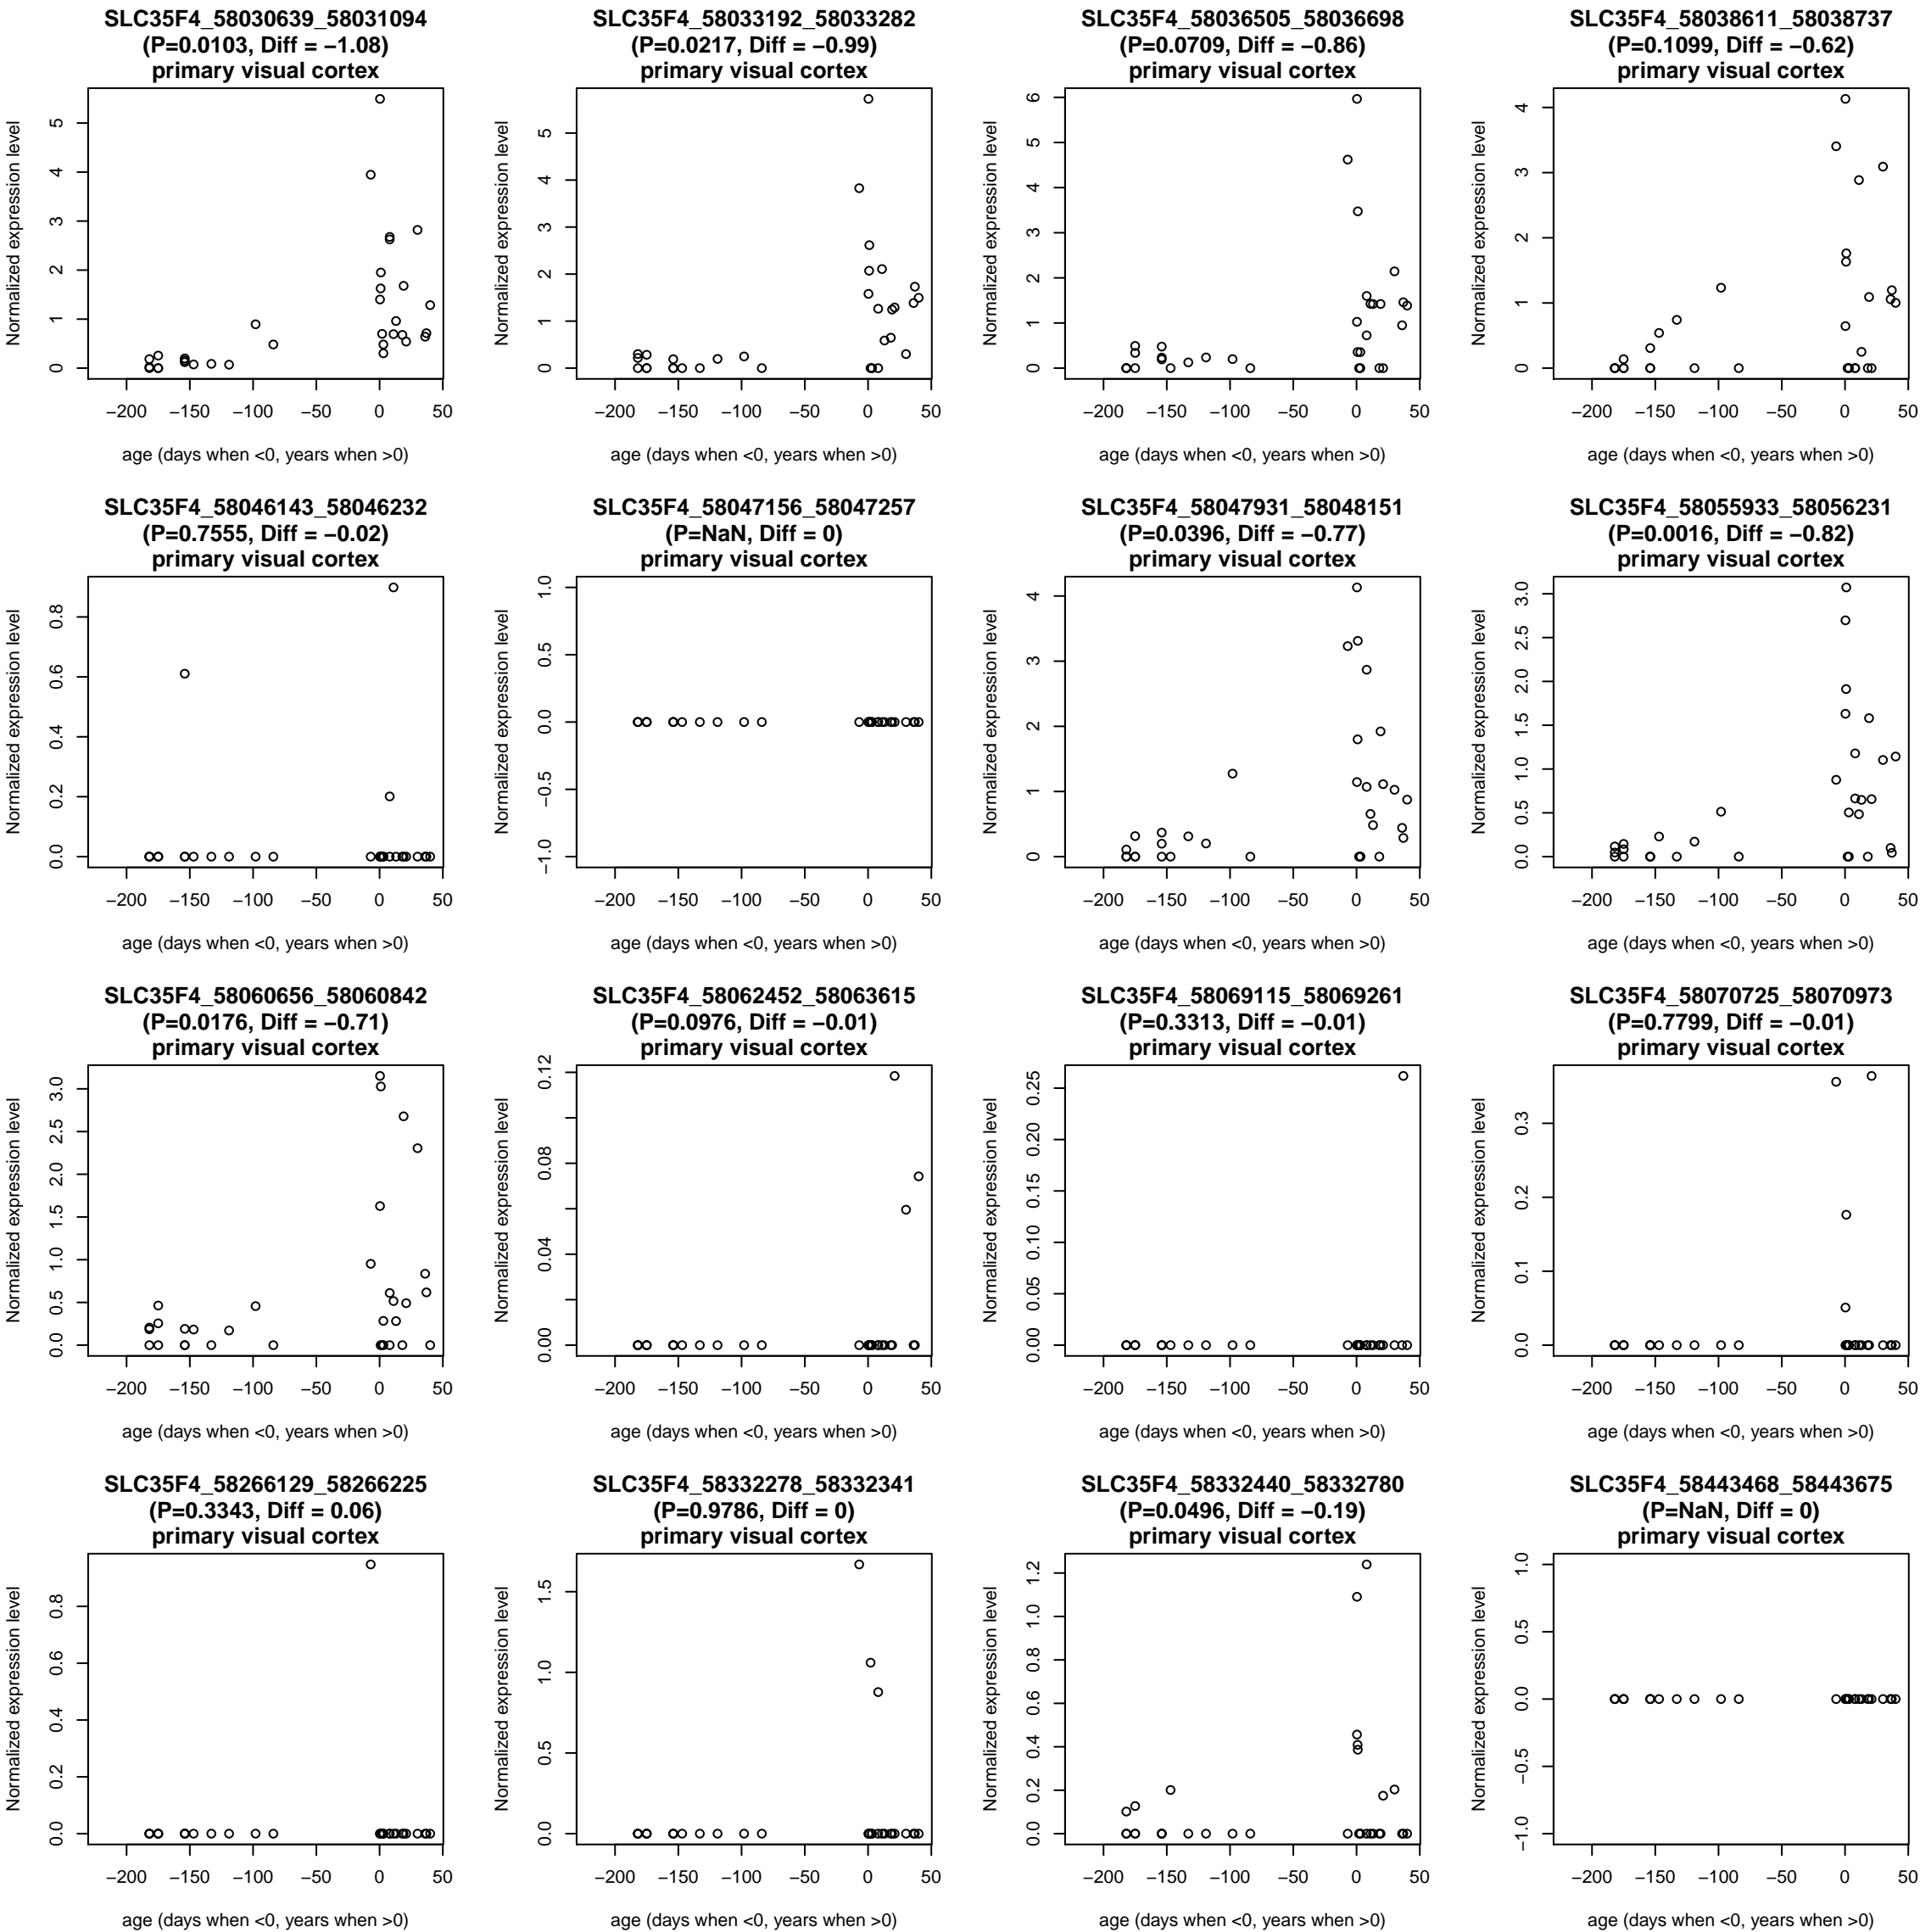

SLC35F4\_58448630\_58448912  
(P=NaN, Diff = 0)  
primary visual cortex

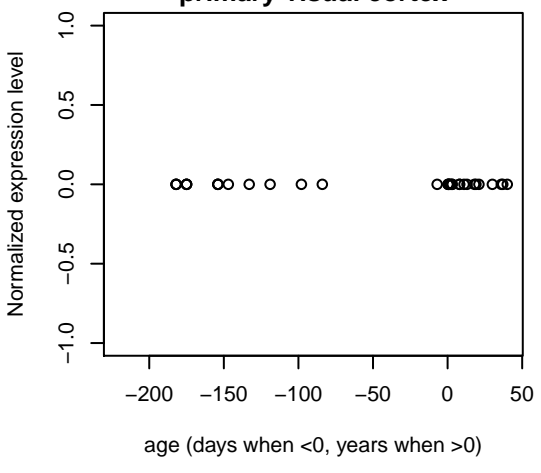

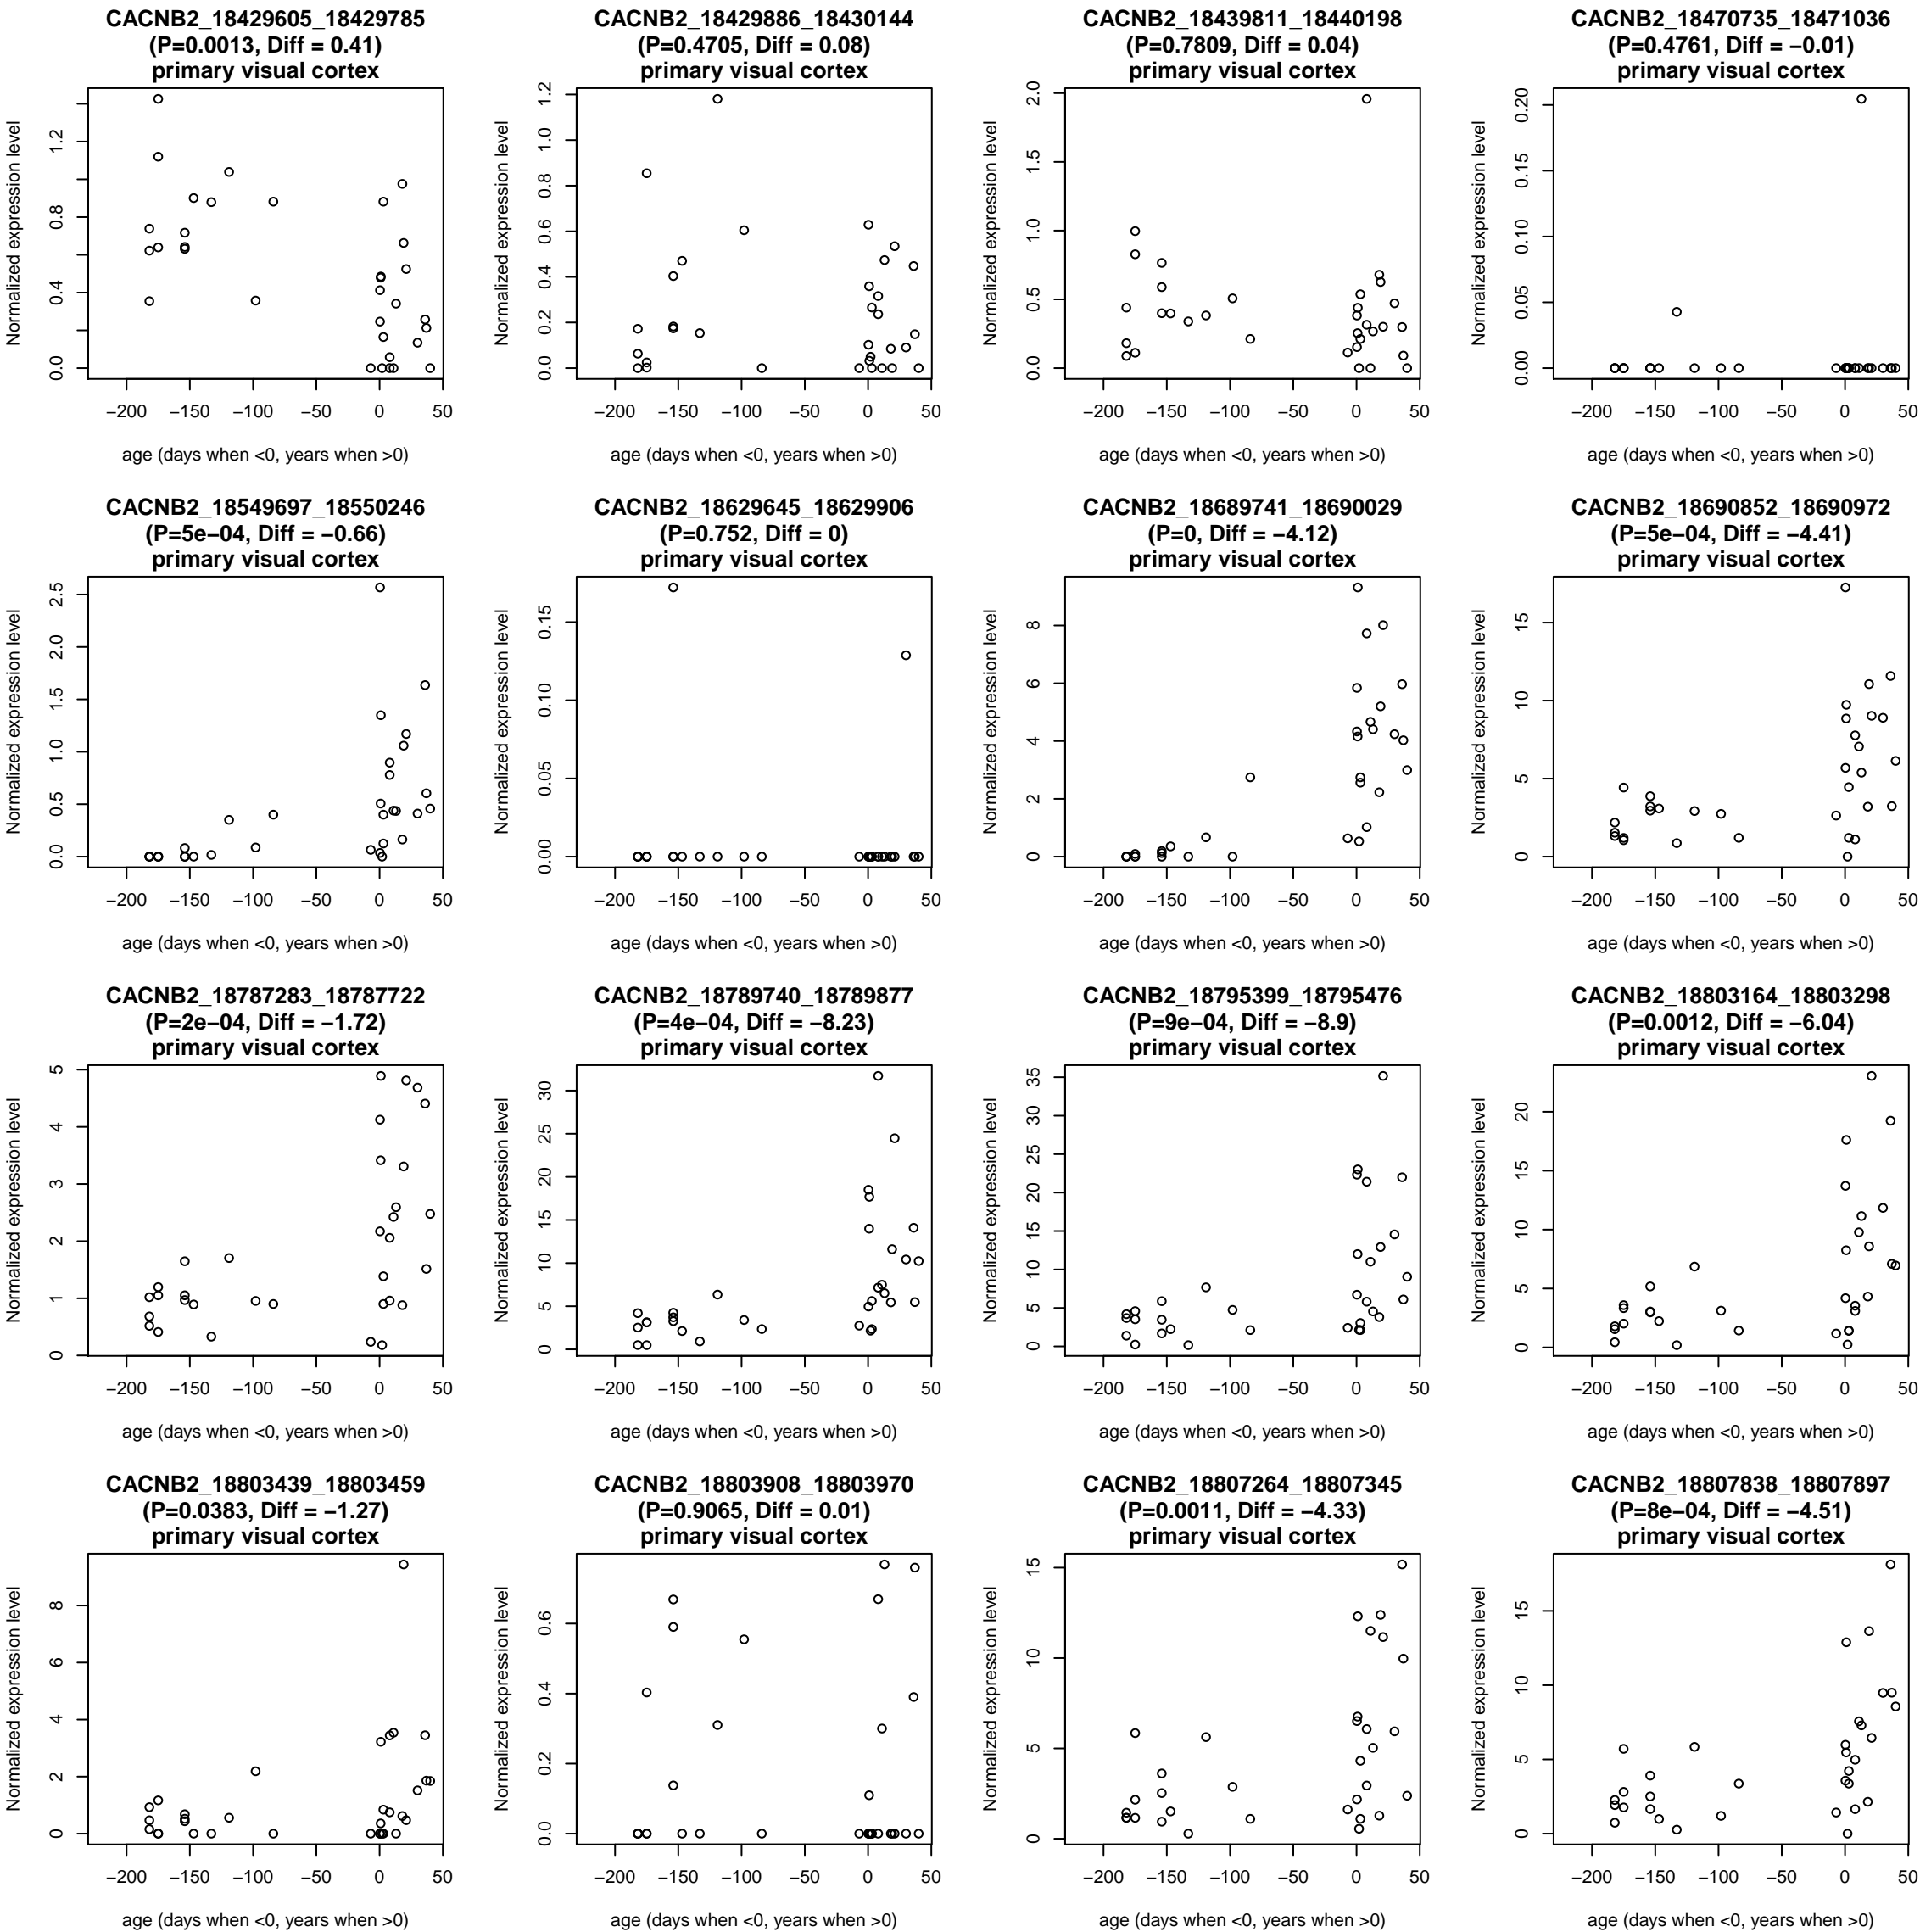

**CACNB2\_18816516\_18816626**  
(P=0, Diff = -8.16)  
primary visual cortex

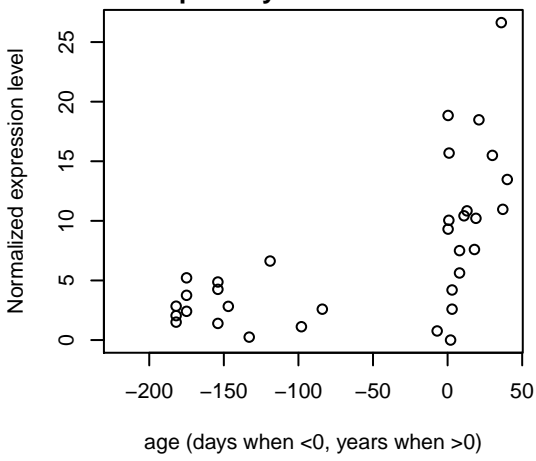

**CACNB2\_18823004\_18823156**  
(P=0, Diff = -6.91)  
primary visual cortex

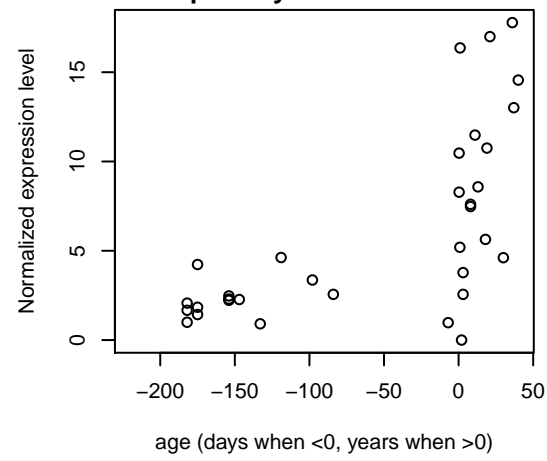

**CACNB2\_18825029\_18825125**  
(P=1e-04, Diff = -7.52)  
primary visual cortex

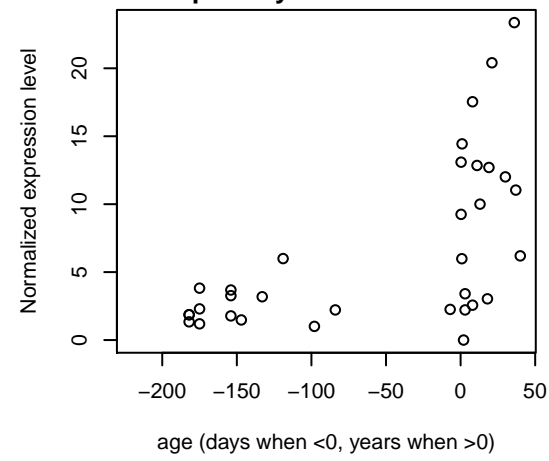

**CACNB2\_18827108\_18827294**  
(P=3e-04, Diff = -7.73)  
primary visual cortex

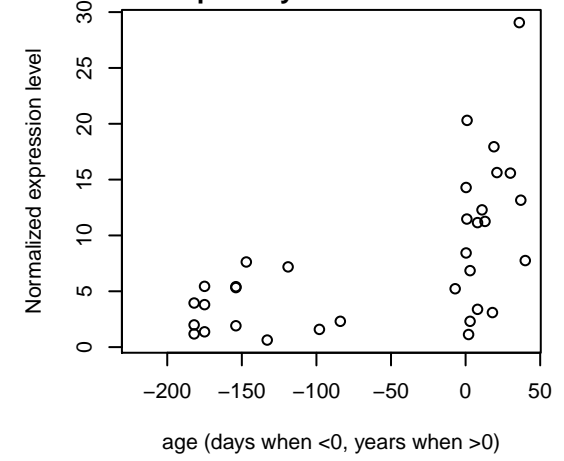

**CACNB2\_18828158\_18830798**  
(P=0, Diff = -6.8)  
primary visual cortex

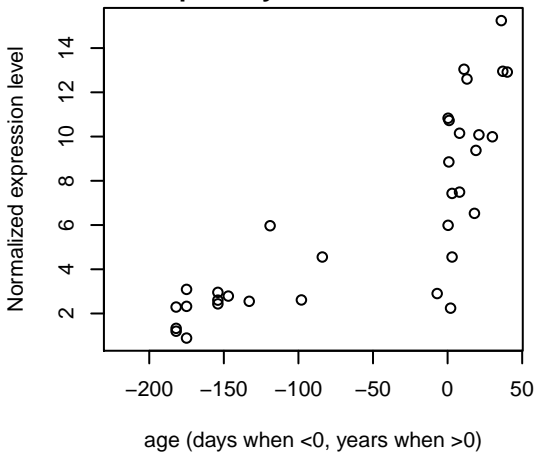

**CTH\_70876900\_70877266**  
(P=0.9939, Diff = 0)  
primary visual cortex

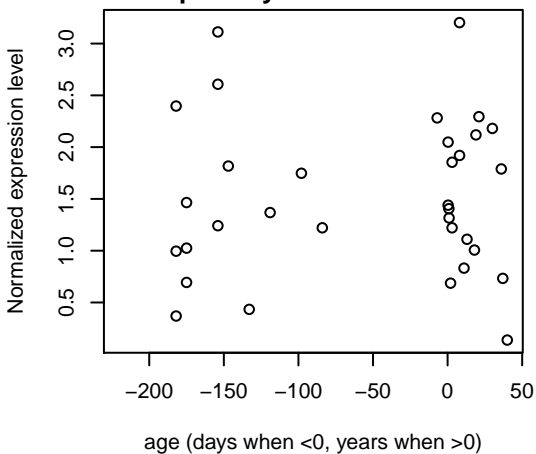

**CTH\_70881638\_70881720**  
(P=0.7106, Diff = 0.11)  
primary visual cortex

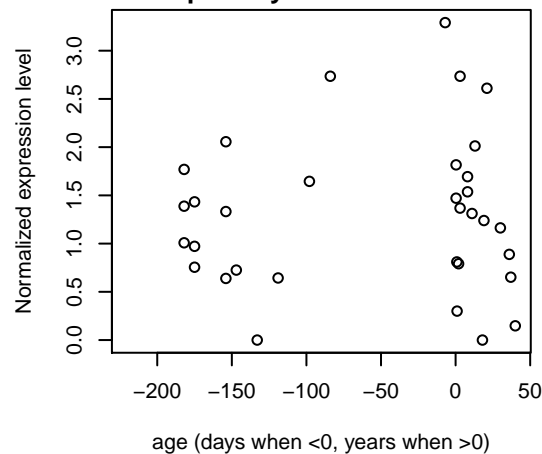

**CTH\_70883619\_70883715**  
(P=0.1161, Diff = -0.58)  
primary visual cortex

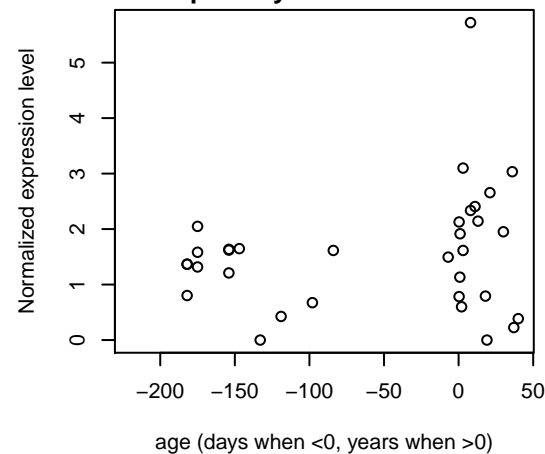

**CTH\_70887248\_70887358**  
(P=0.7683, Diff = 0.12)  
primary visual cortex

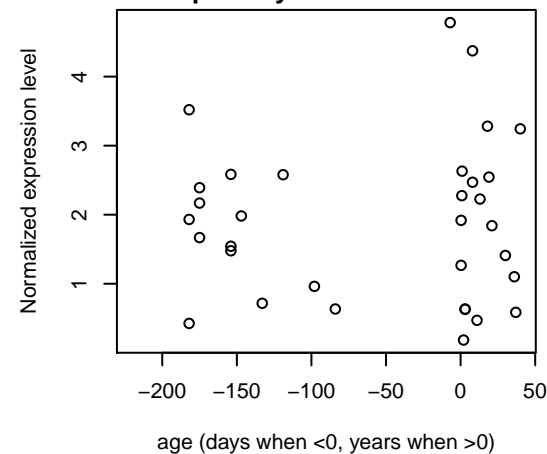

**CTH\_70889967\_70890099**  
(P=0.3989, Diff = 0.29)  
primary visual cortex

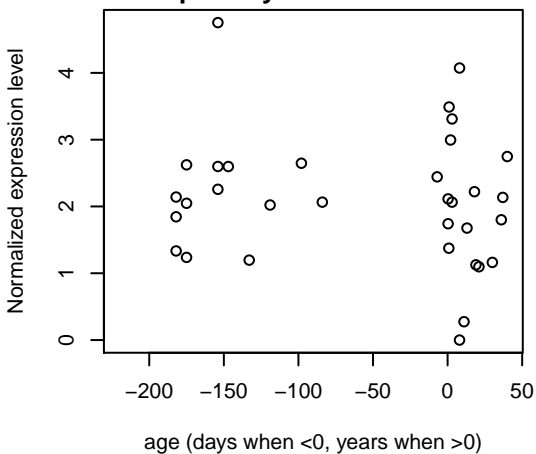

**CTH\_70895476\_70895534**  
(P=0.9901, Diff = 0)  
primary visual cortex

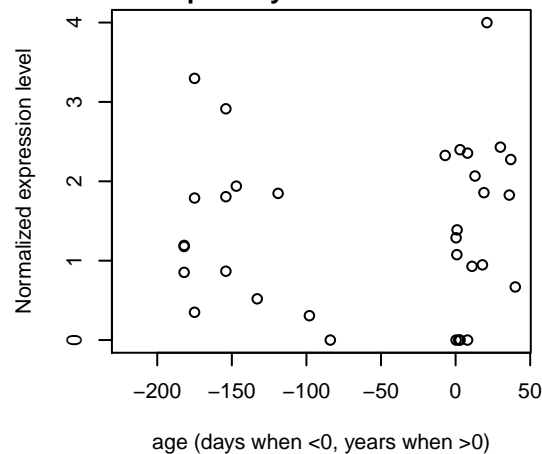

**CTH\_70895999\_70896077**  
(P=0.4867, Diff = -0.33)  
primary visual cortex

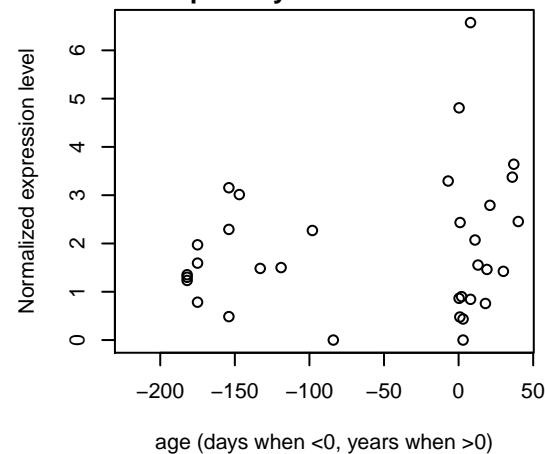

**CTH\_70897765\_70897918**  
(P=0.4738, Diff = -0.31)  
primary visual cortex

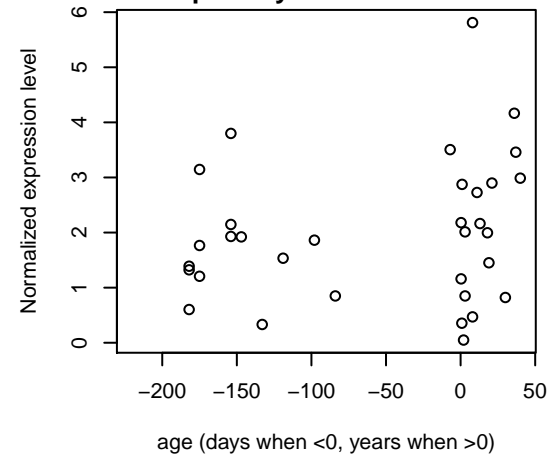

**CTH\_70899510\_70899632**  
(P=0.212, Diff = -0.63)  
primary visual cortex

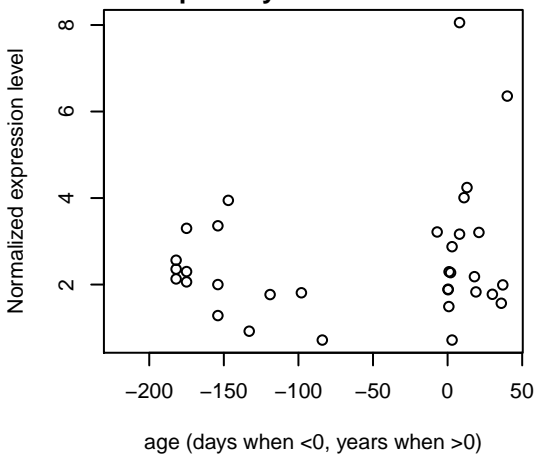

**CTH\_70900533\_70900860**  
(P=0.1439, Diff = -0.23)  
primary visual cortex

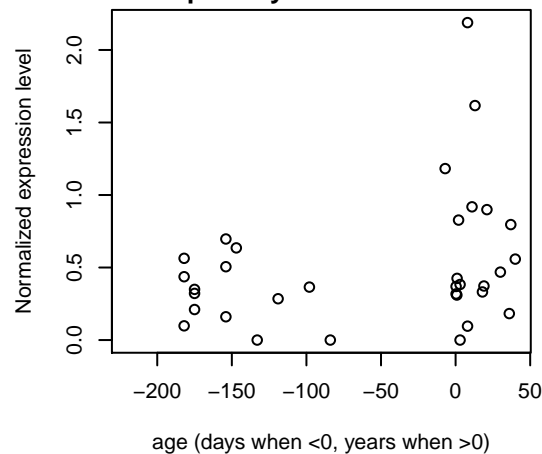

**CTH\_70904370\_70904509**  
(P=0.3933, Diff = -0.64)  
primary visual cortex

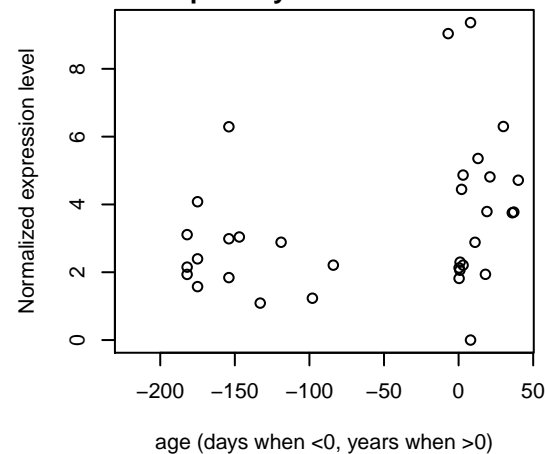

**CTH\_70904783\_70905534**  
(P=0.0366, Diff = -0.63)  
primary visual cortex

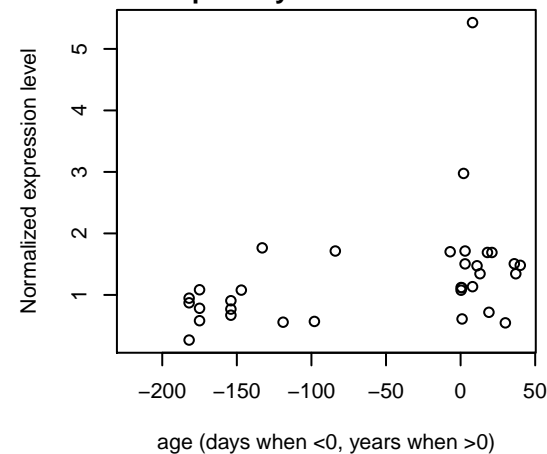

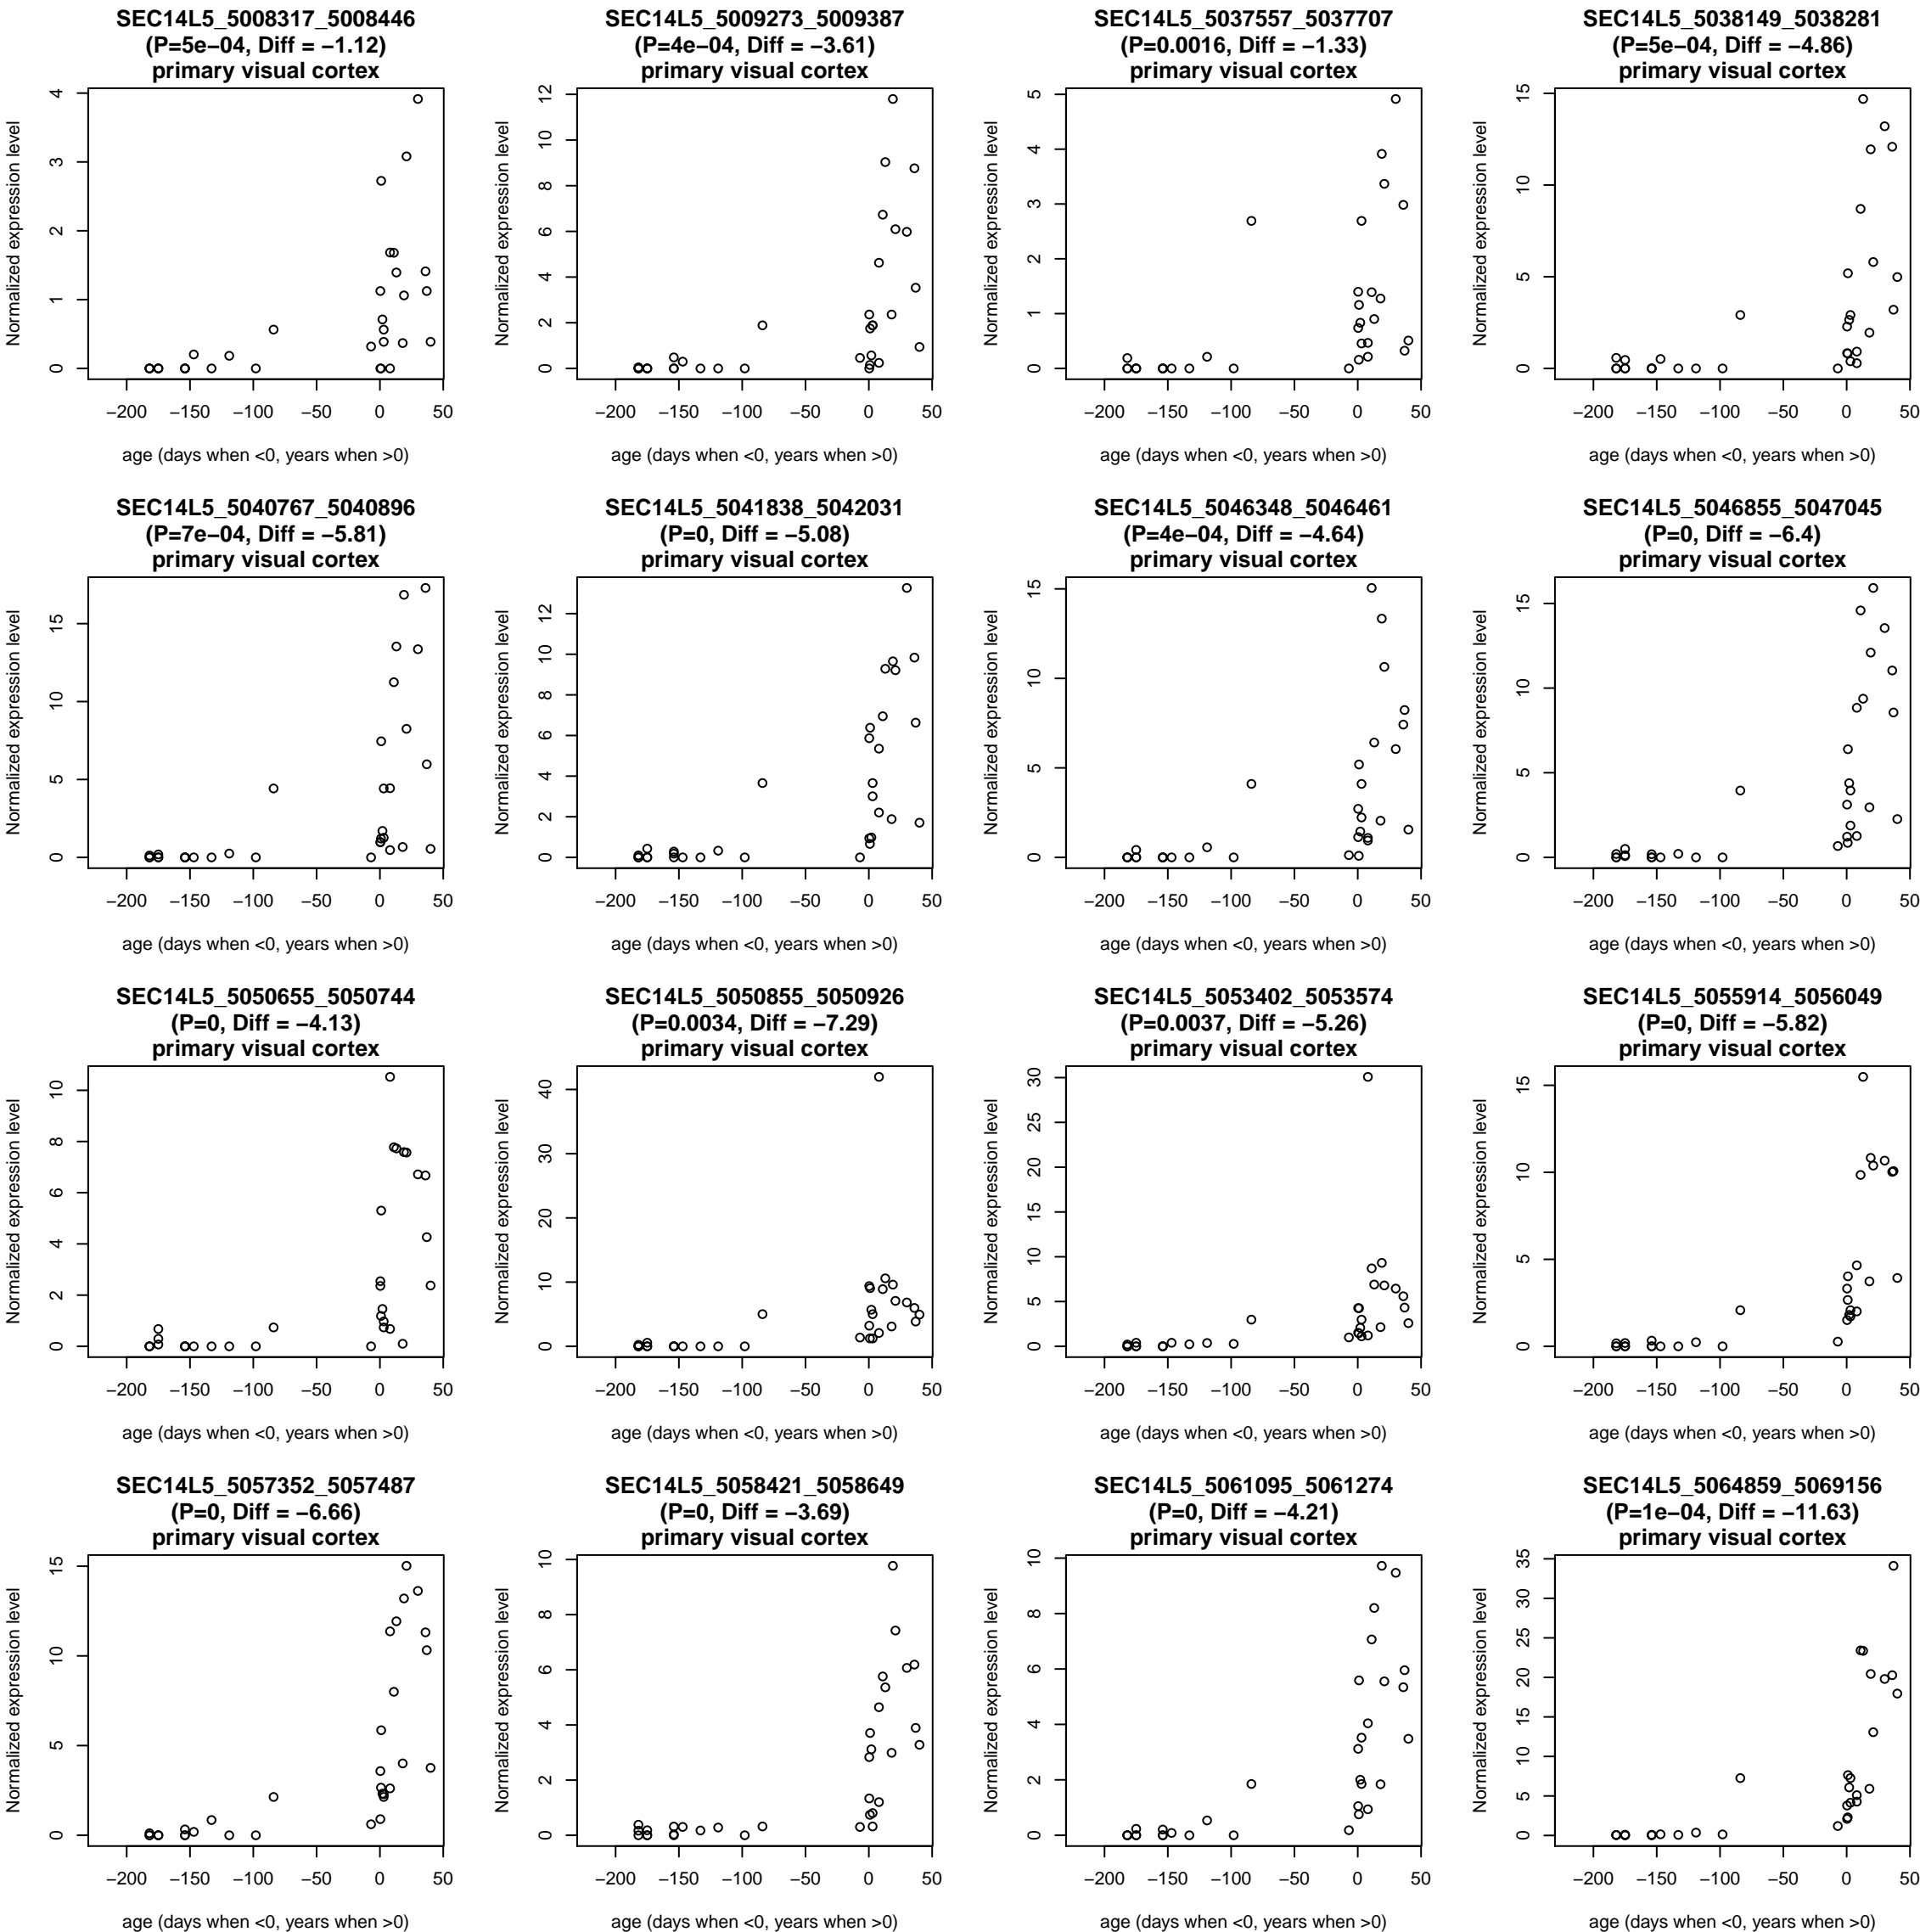

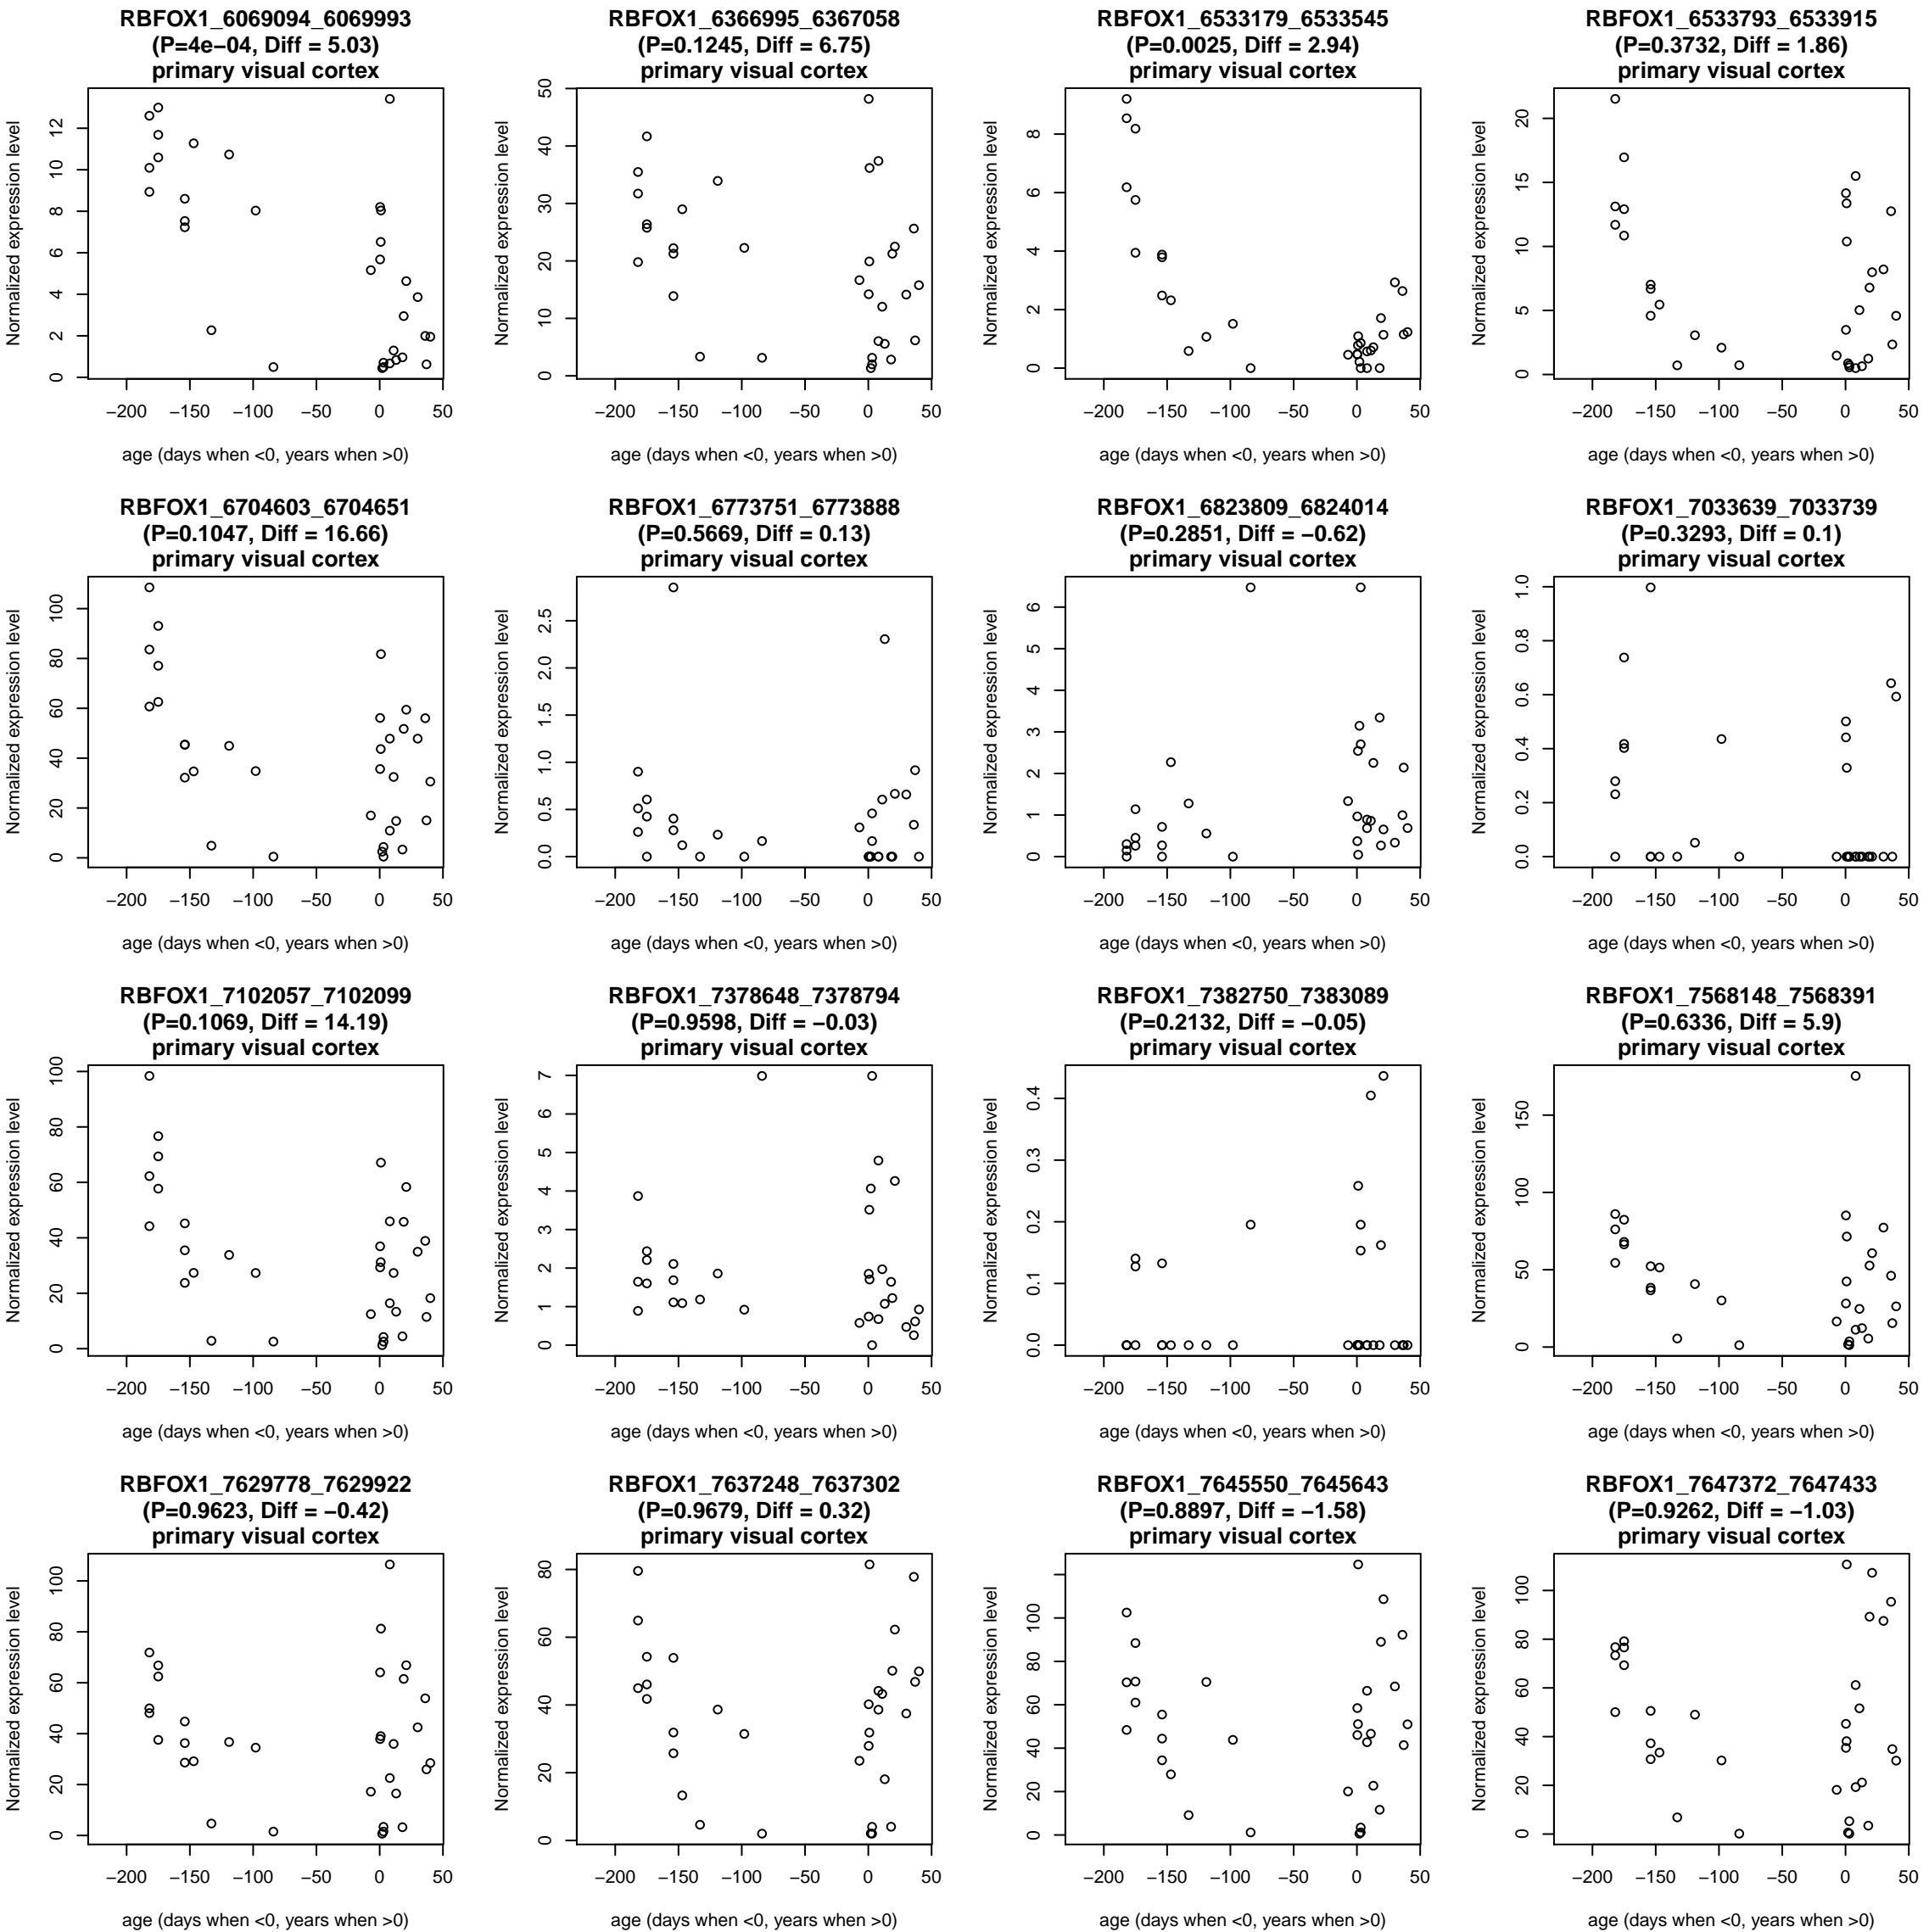

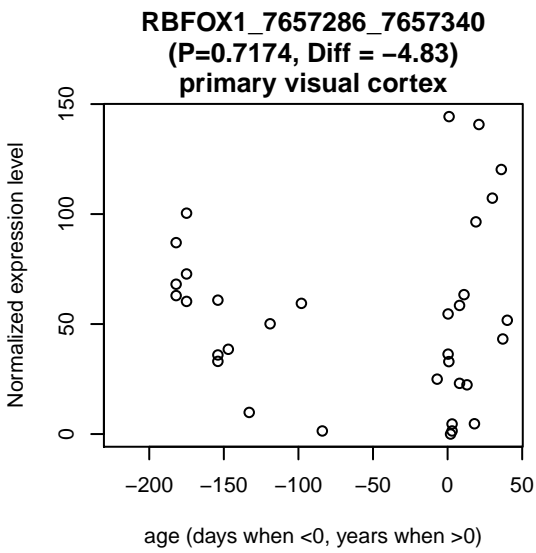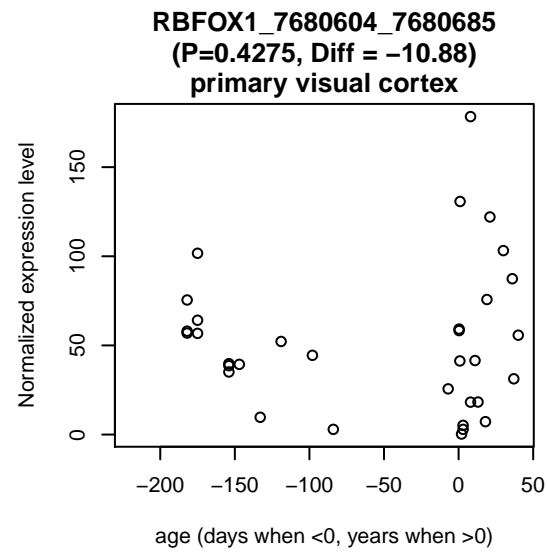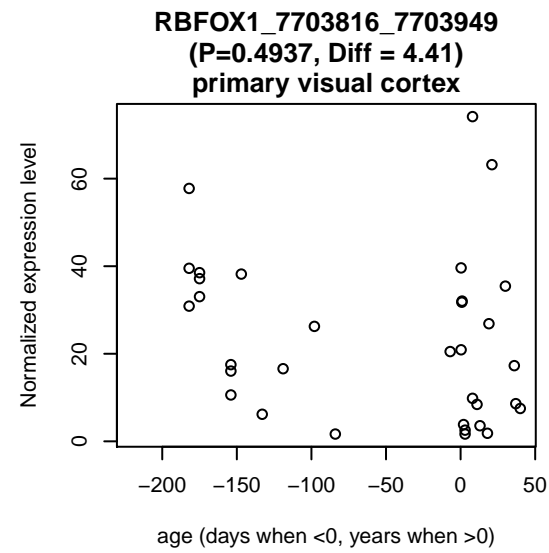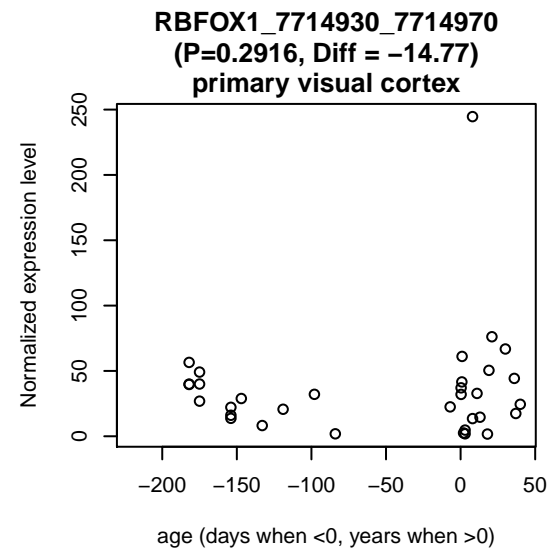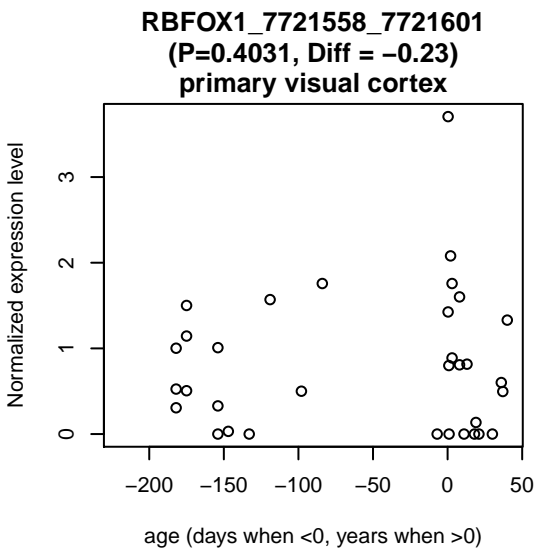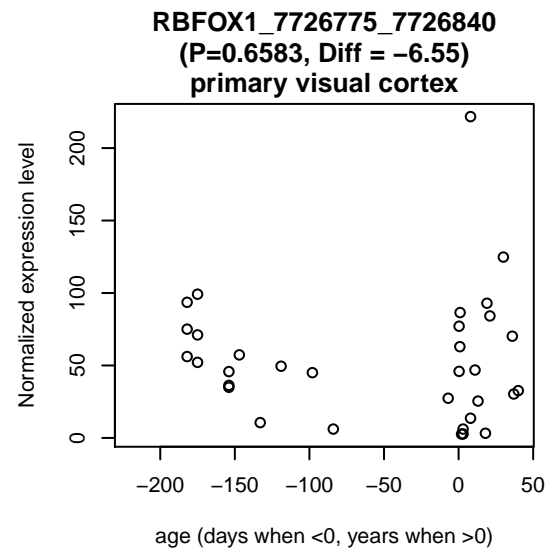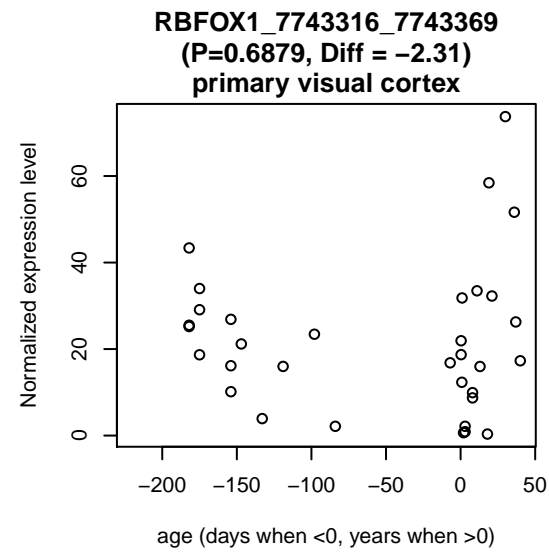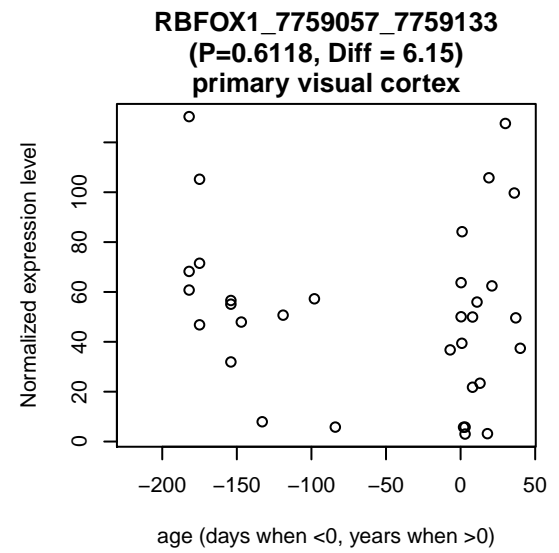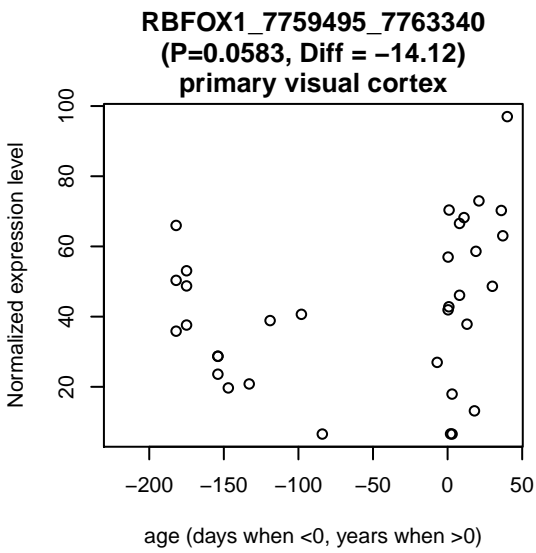



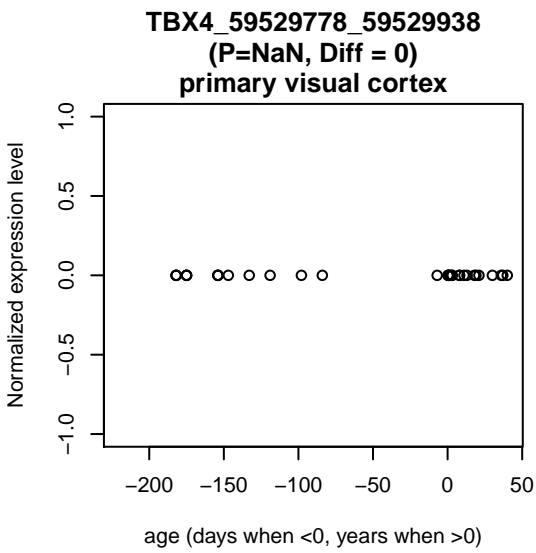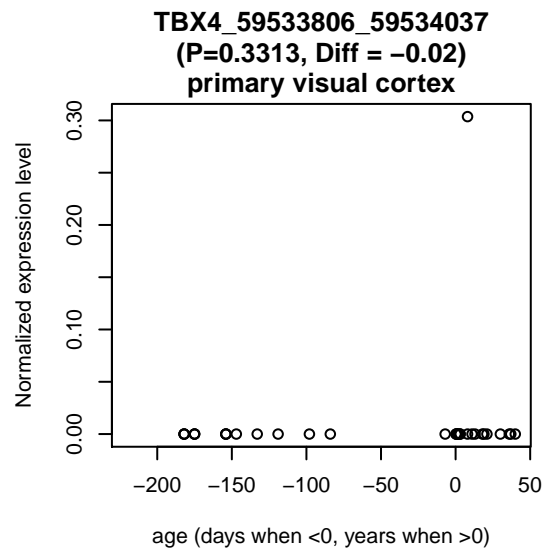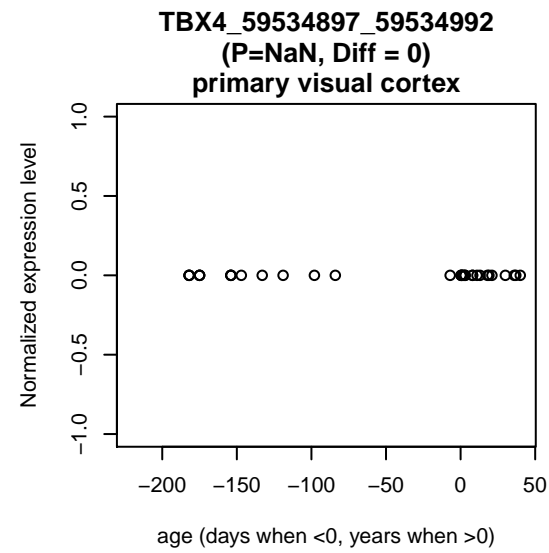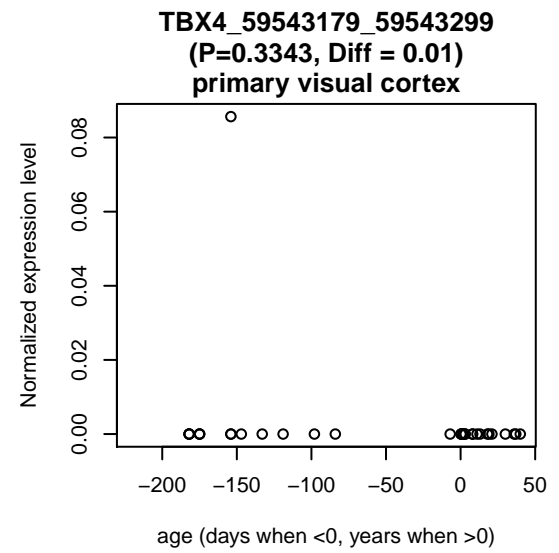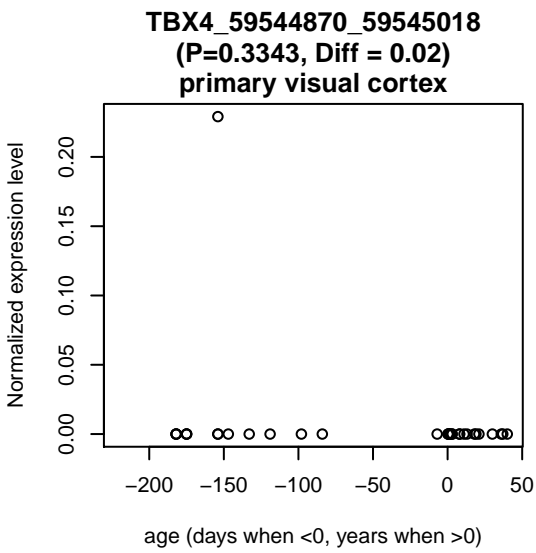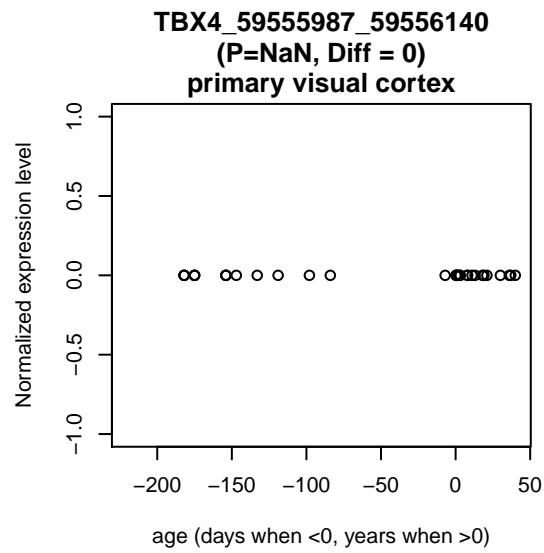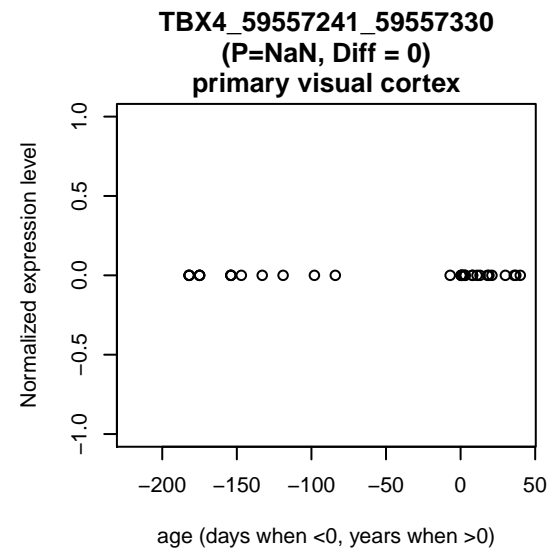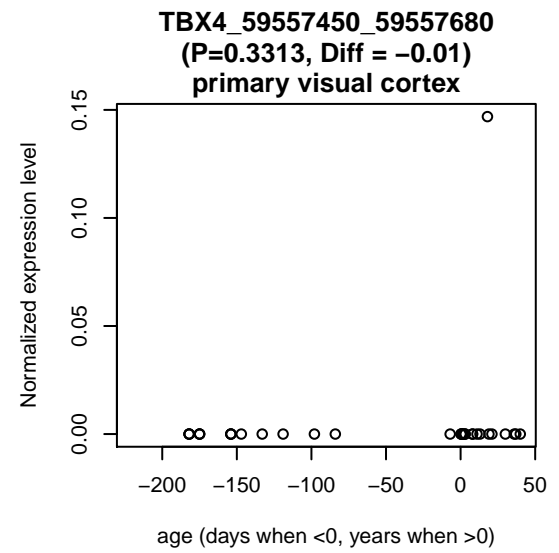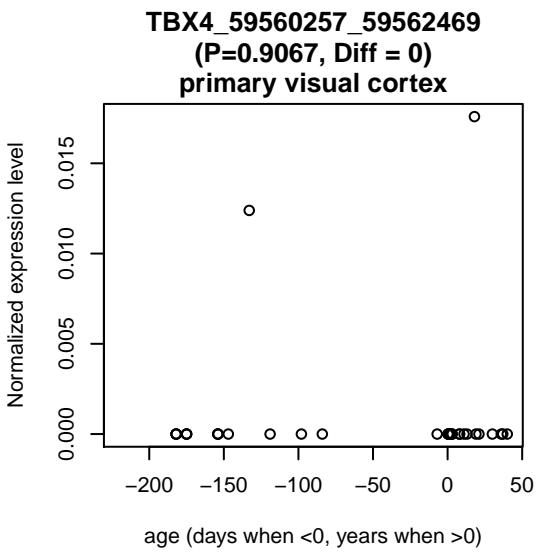

**FRG1\_190861942\_190862226**  
(P=0, Diff = 7.45)  
primary visual cortex

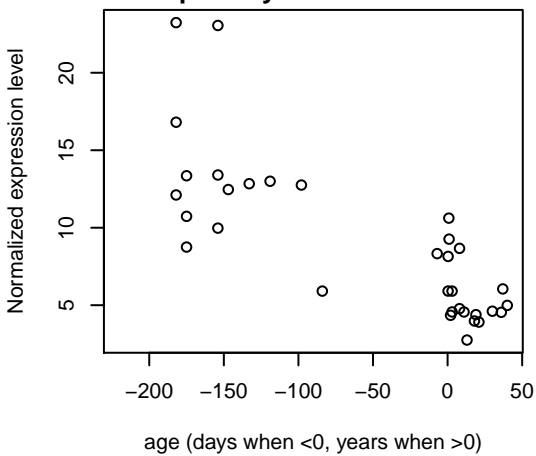

**FRG1\_190862987\_190863159**  
(P=0.7858, Diff = 0.01)  
primary visual cortex

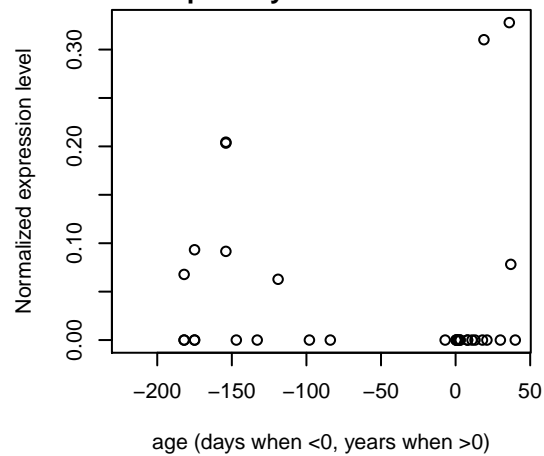

**FRG1\_190864356\_190864427**  
(P=1e-04, Diff = 7.6)  
primary visual cortex

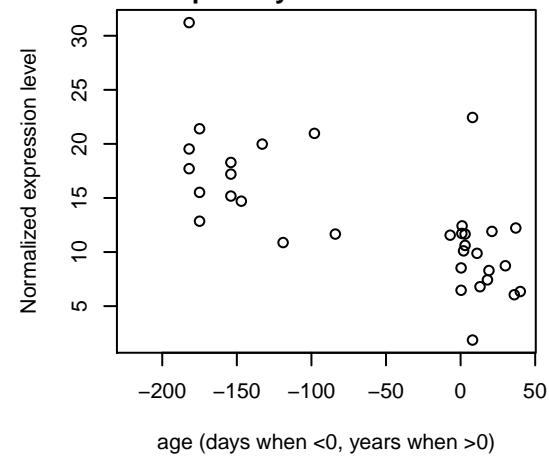

**FRG1\_190873316\_190873442**  
(P=0.0014, Diff = 17.32)  
primary visual cortex

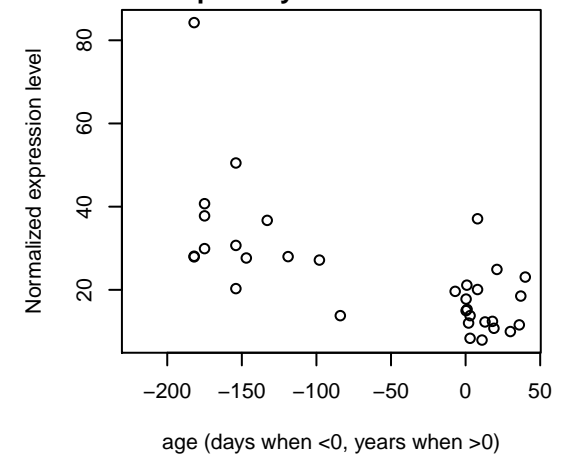

**FRG1\_190874222\_190874280**  
(P=0.0019, Diff = 9.34)  
primary visual cortex

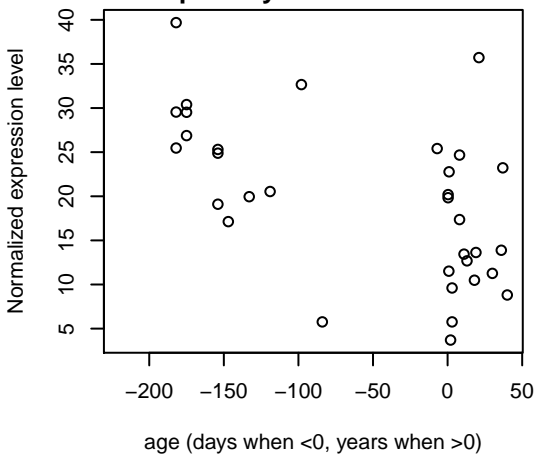

**FRG1\_190876191\_190876306**  
(P=0.0014, Diff = 10.94)  
primary visual cortex

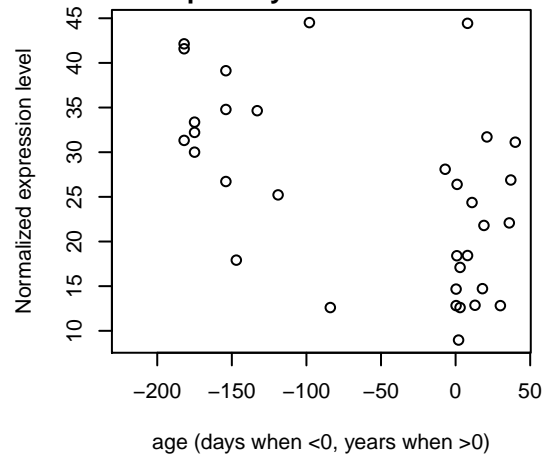

**FRG1\_190878552\_190878657**  
(P=0.4302, Diff = 1.64)  
primary visual cortex

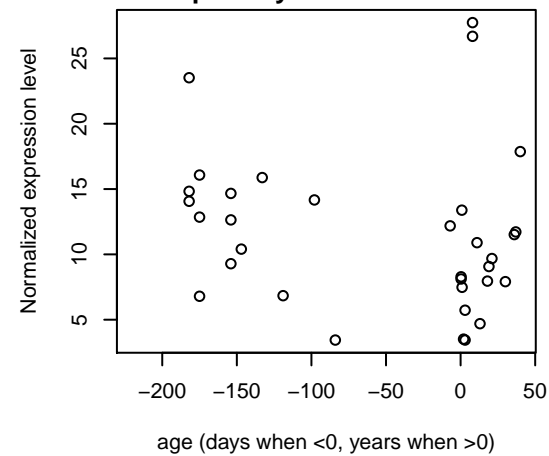

**FRG1\_190881902\_190881994**  
(P=0.4566, Diff = 1.57)  
primary visual cortex

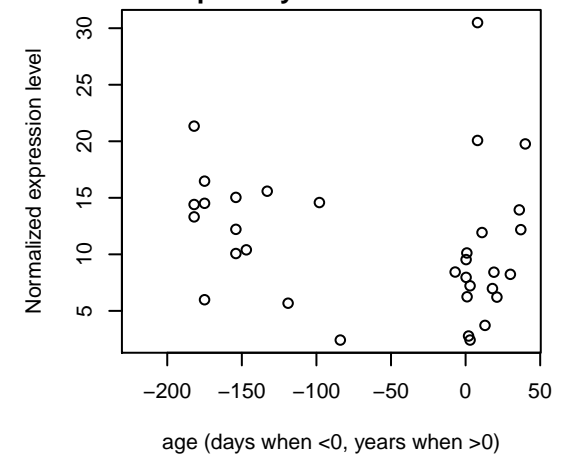

**FRG1\_190882016\_190882355**  
(P=0.0086, Diff = 0.38)  
primary visual cortex

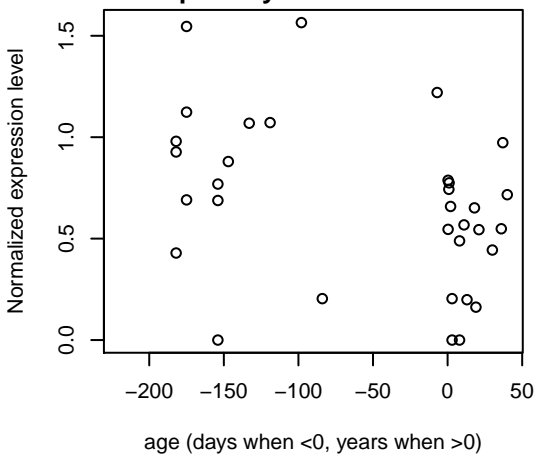

**FRG1\_190882583\_190882705**  
(P=0.3781, Diff = 0.08)  
primary visual cortex

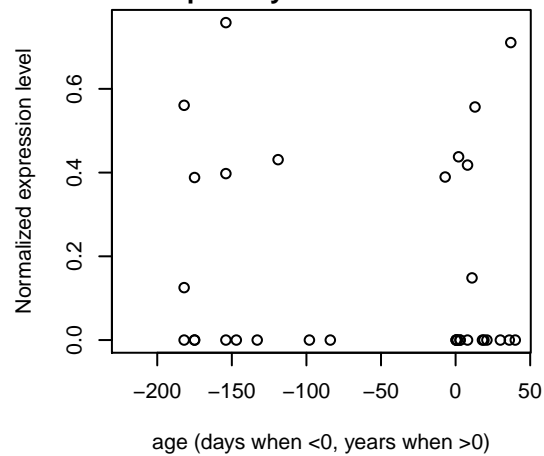

**FRG1\_190882976\_190883087**  
(P=0.0717, Diff = 14.17)  
primary visual cortex

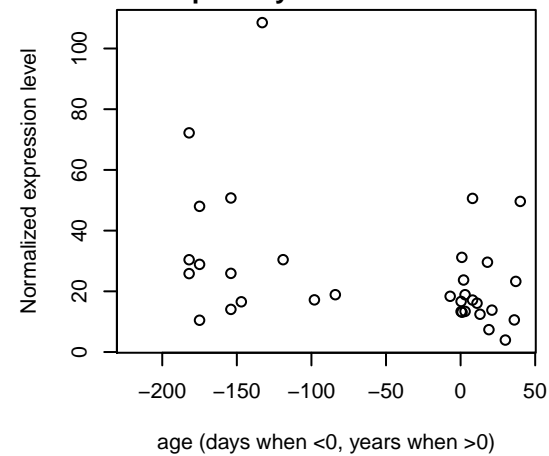

**FRG1\_190884247\_190884359**  
(P=0.0756, Diff = 6.92)  
primary visual cortex

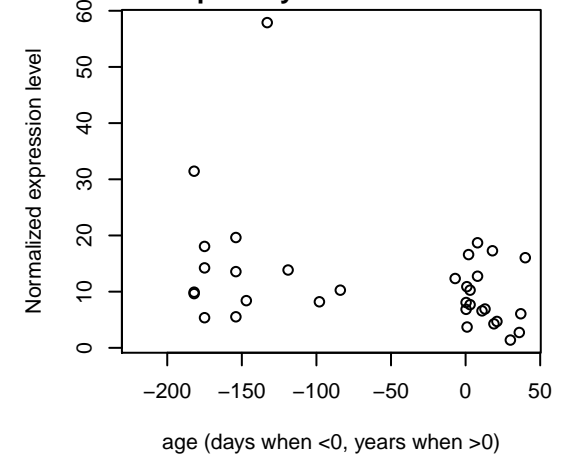

**METTL4\_2537523\_2539144**  
(**P=0.0184, Diff = -0.7**)  
primary visual cortex

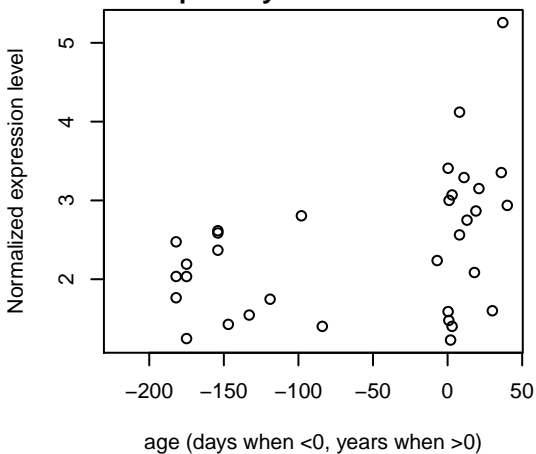

**METTL4\_2544193\_2544285**  
(**P=0.9647, Diff = 0.02**)  
primary visual cortex

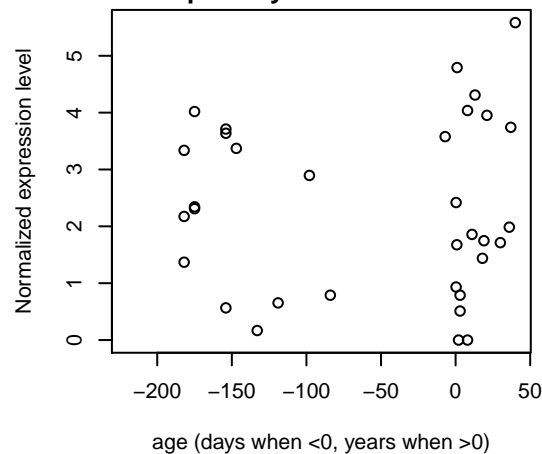

**METTL4\_2544651\_2544758**  
(**P=0.6205, Diff = 0.24**)  
primary visual cortex

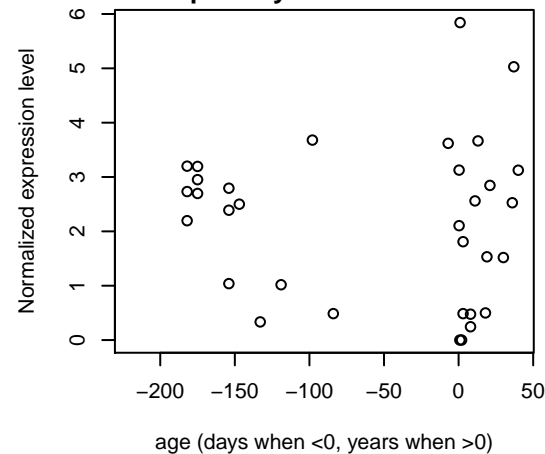

**METTL4\_2547353\_2547528**  
(**P=0.1829, Diff = 0.62**)  
primary visual cortex

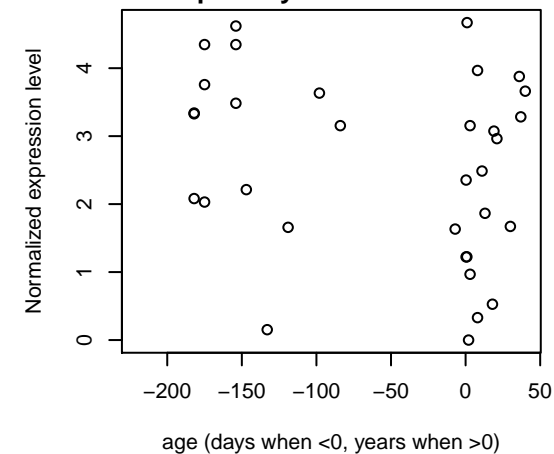

**METTL4\_2552693\_2552763**  
(**P=0.6362, Diff = 0.17**)  
primary visual cortex

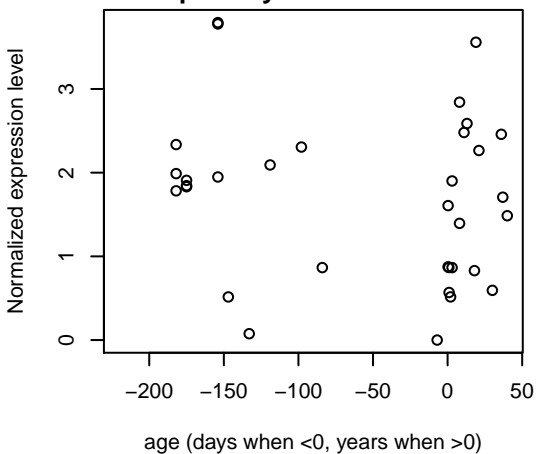

**METTL4\_2554667\_2555037**  
(**P=0.2882, Diff = 0.49**)  
primary visual cortex

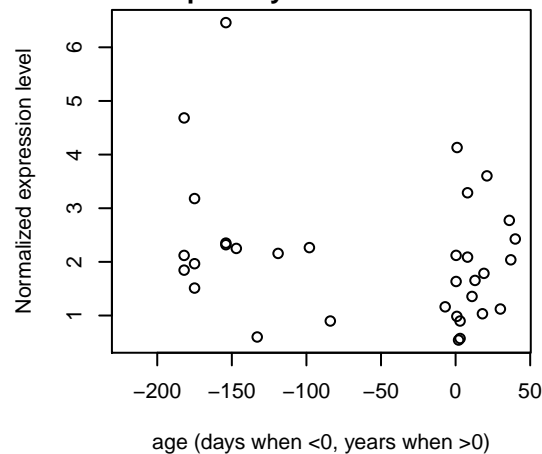

**METTL4\_2563795\_2563858**  
(**P=0.3464, Diff = 0.48**)  
primary visual cortex

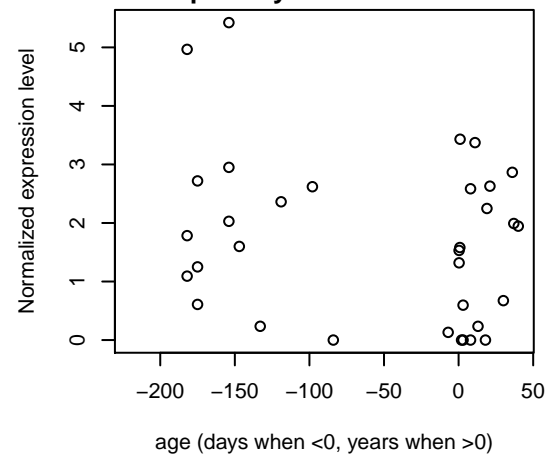

**METTL4\_2566819\_2567653**  
(**P=0.0075, Diff = 0.97**)  
primary visual cortex

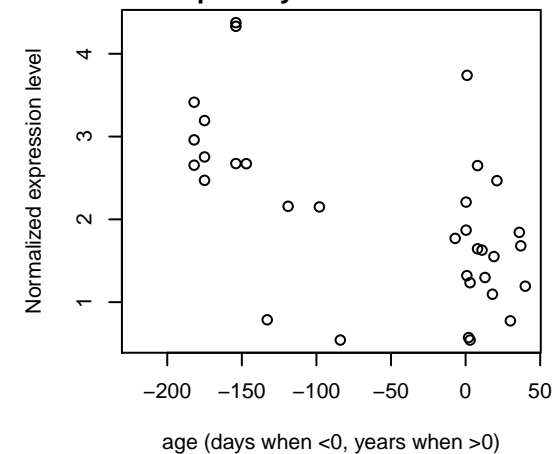

**METTL4\_2571147\_2571508**  
(**P=0.0155, Diff = 0.68**)  
primary visual cortex

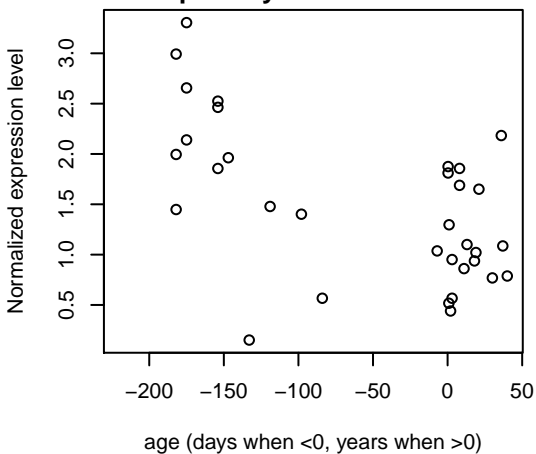

**C7orf11\_40172341\_40172858**  
(P=0.0149, Diff = 3.74)  
primary visual cortex

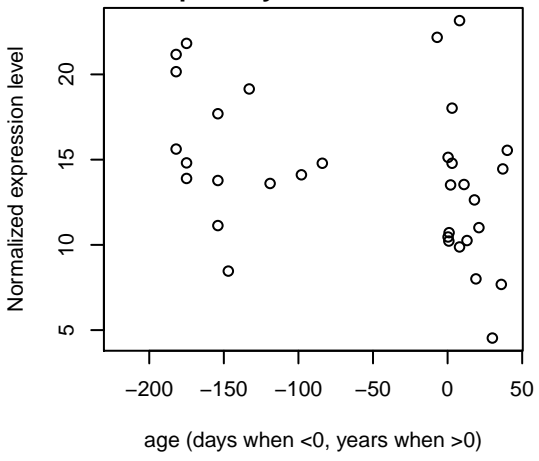

**C7orf11\_40173827\_40174258**  
(P=9e-04, Diff = 7.78)  
primary visual cortex

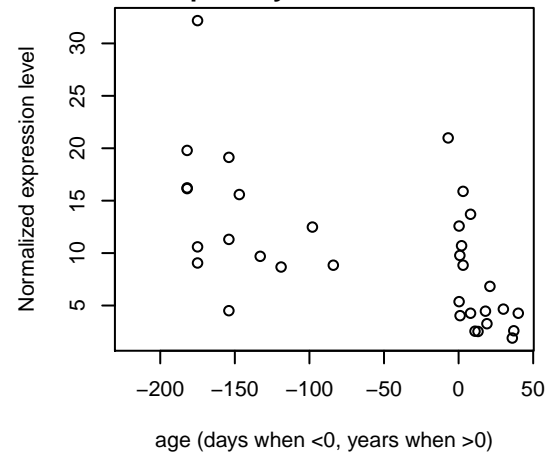

**KLF13\_31619057\_31619992**  
(P=0.3291, Diff = -0.27)  
striatum

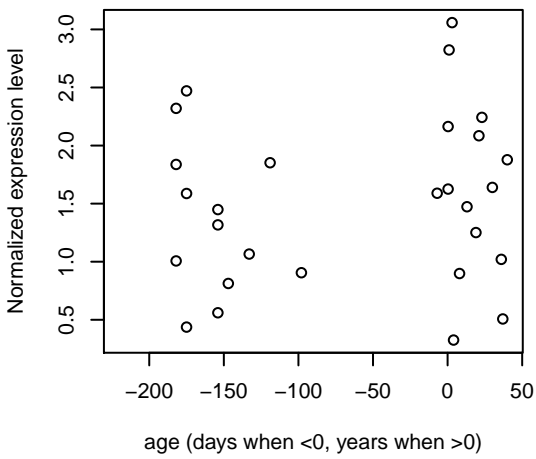

**KLF13\_31632135\_31632190**  
(P=0.1768, Diff = -0.12)  
striatum

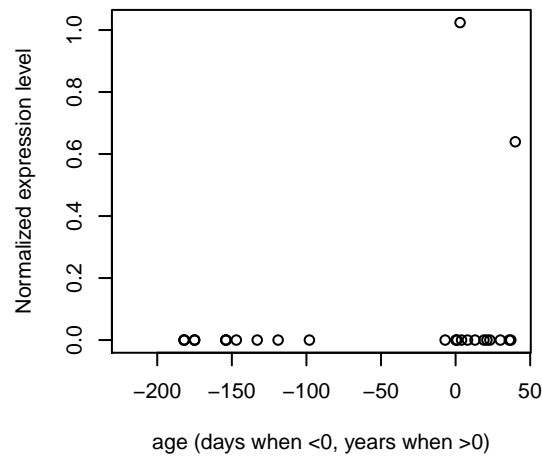

**KLF13\_31658356\_31658757**  
(P=0.0033, Diff = -0.16)  
striatum

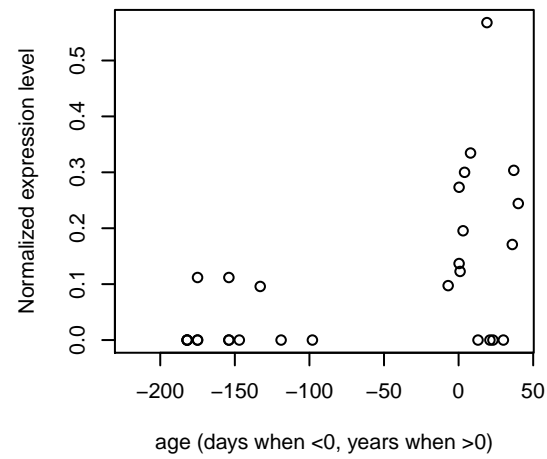

**KLF13\_31664212\_31670102**  
(P=0, Diff = -10.34)  
striatum

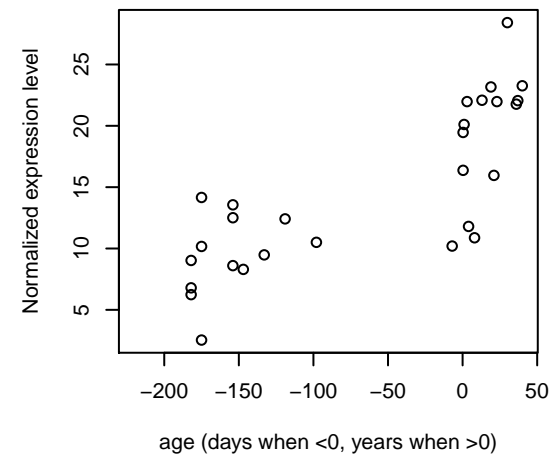

**KLF13\_31685045\_31685458**  
(P=0.1221, Diff = -0.05)  
striatum

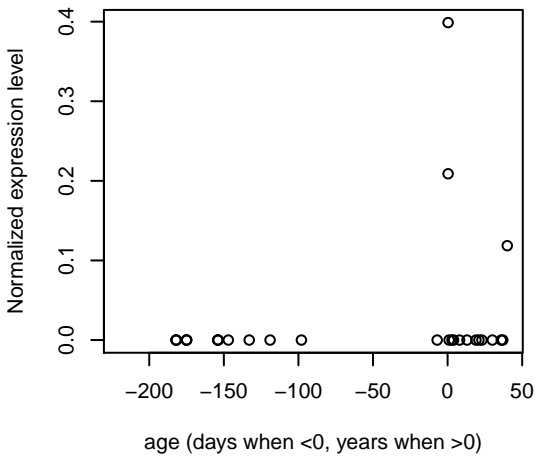

**KLF13\_31685777\_31685894**  
(P=0.3356, Diff = 0)  
striatum

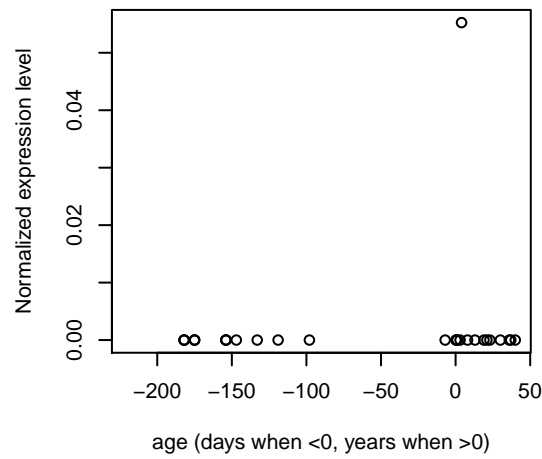

**KLF13\_31695630\_31696113**  
(P=0.0361, Diff = -0.07)  
striatum

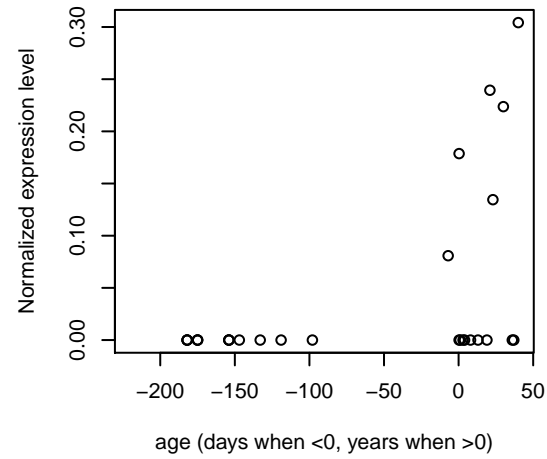

**KLF13\_31727572\_31727868**  
(P=0.475, Diff = 0.04)  
striatum

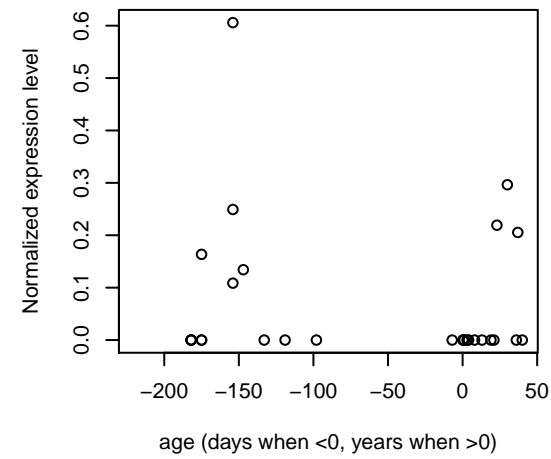

**EYA2\_4523262\_45523626**  
(P=0.0778, Diff = 0.16)  
striatum

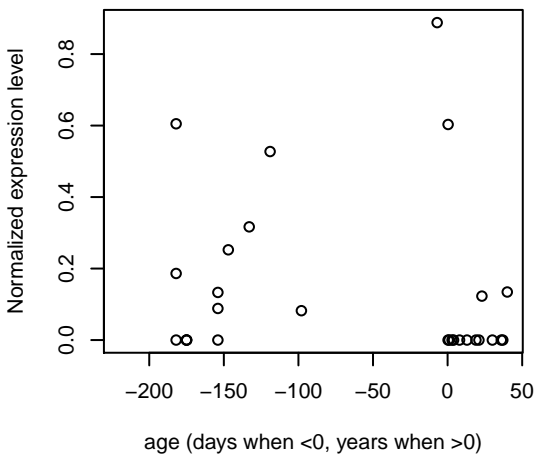

**EYA2\_45606873\_45607275**  
(P=0.5333, Diff = -0.01)  
striatum

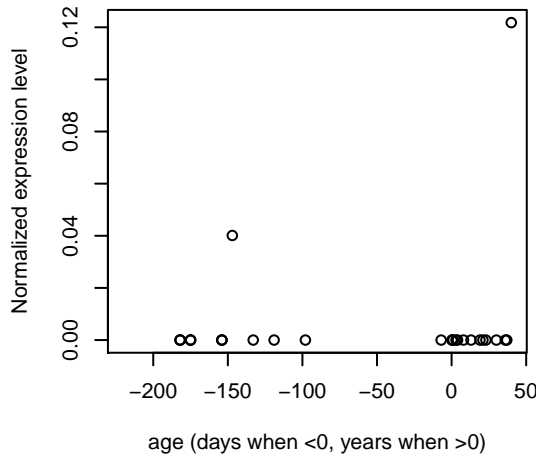

**EYA2\_45608121\_45608269**  
(P=NaN, Diff = 0)  
striatum

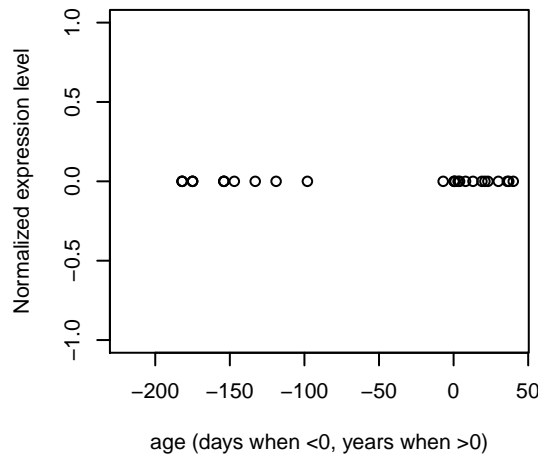

**EYA2\_45608330\_45608428**  
(P=NaN, Diff = 0)  
striatum

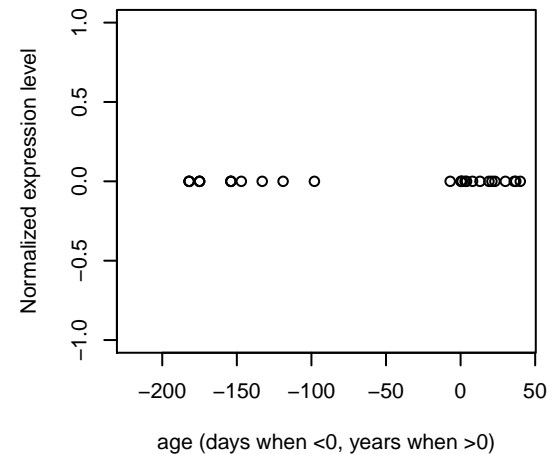

**EYA2\_45618639\_45618758**  
(P=0.0149, Diff = 1.11)  
striatum

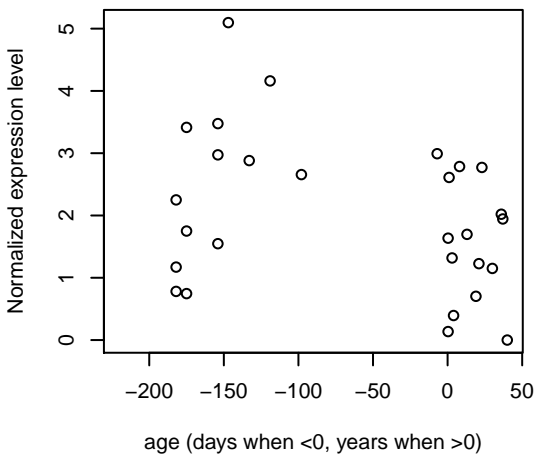

**EYA2\_45630066\_45630112**  
(P=0.1262, Diff = 1.19)  
striatum

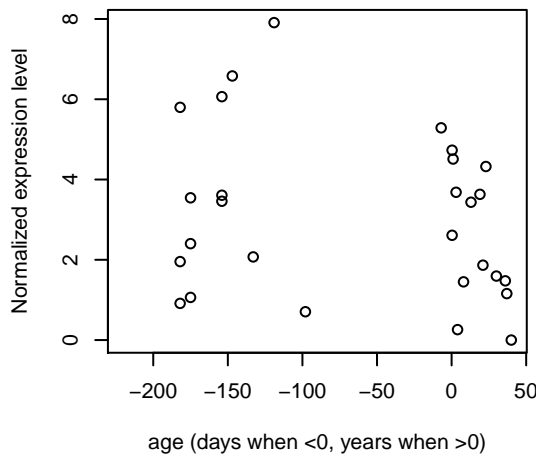

**EYA2\_45633580\_45633723**  
(P=0.0074, Diff = 1.72)  
striatum

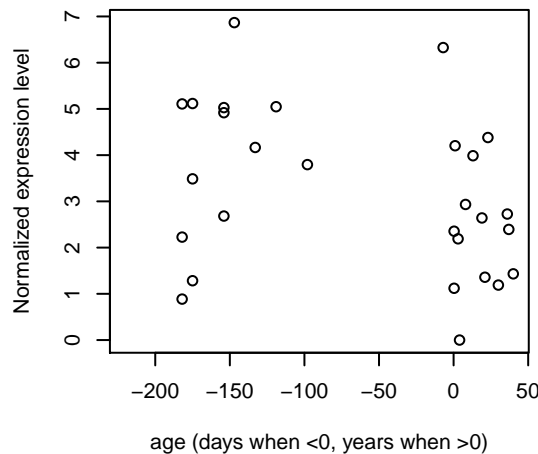

**EYA2\_45644819\_45644936**  
(P=0.3521, Diff = 0.79)  
striatum

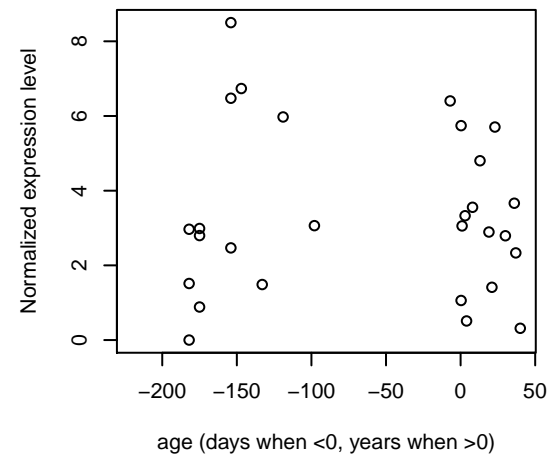

**EYA2\_45700823\_45700891**  
(P=0.3495, Diff = 0.57)  
striatum

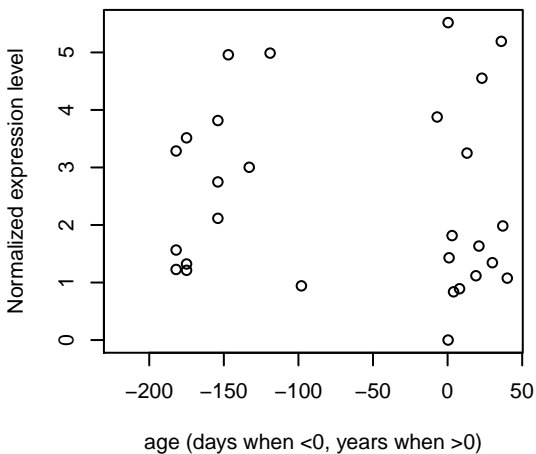

**EYA2\_45702796\_45702974**  
(P=0.2764, Diff = 0.89)  
striatum

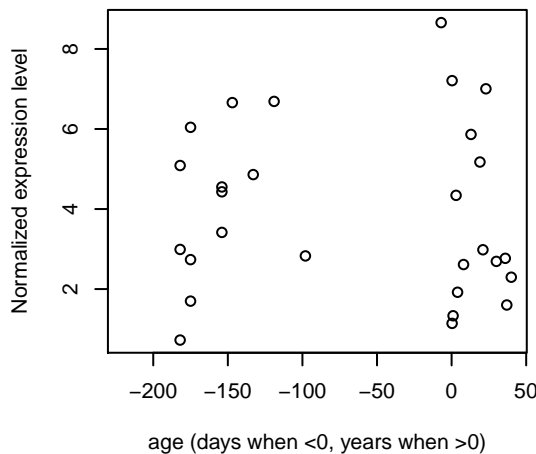

**EYA2\_45717877\_45718020**  
(P=0.6231, Diff = 0.33)  
striatum

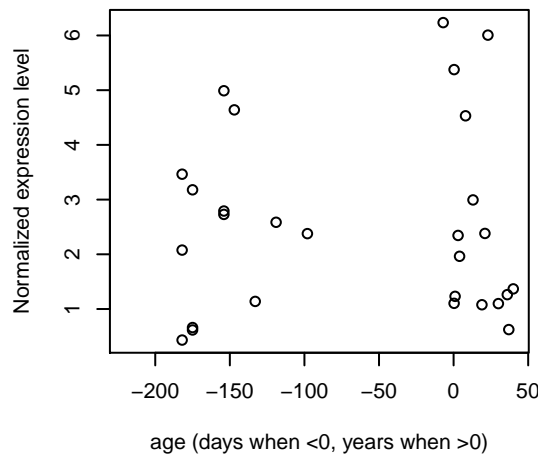

**EYA2\_45724452\_45724719**  
(P=NaN, Diff = 0)  
striatum

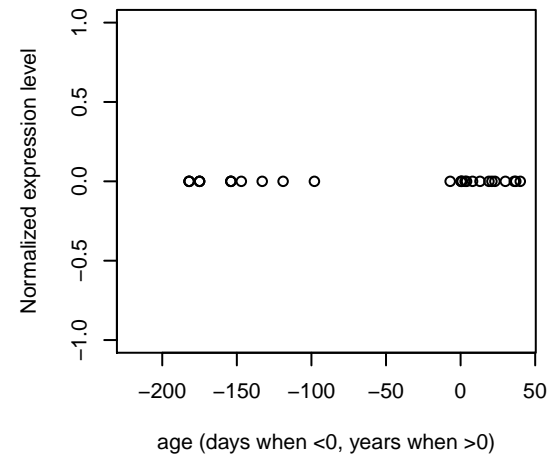

**EYA2\_45725723\_45725807**  
(P=0.5257, Diff = 0.55)  
striatum

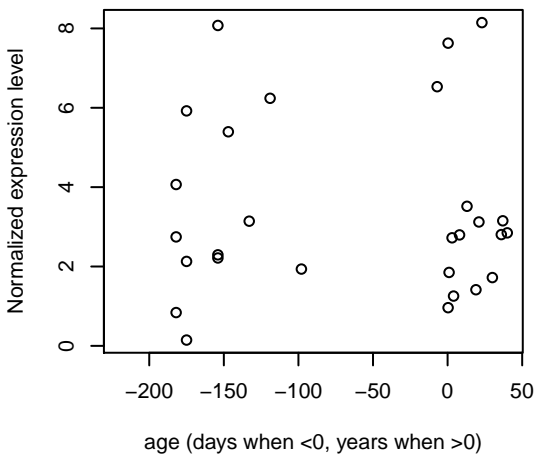

**EYA2\_45771697\_45771788**  
(P=0.2454, Diff = 1.09)  
striatum

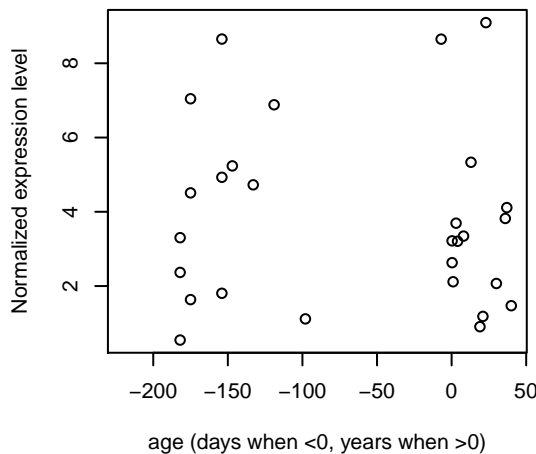

**EYA2\_45797786\_45797845**  
(P=0.1259, Diff = 1.52)  
striatum

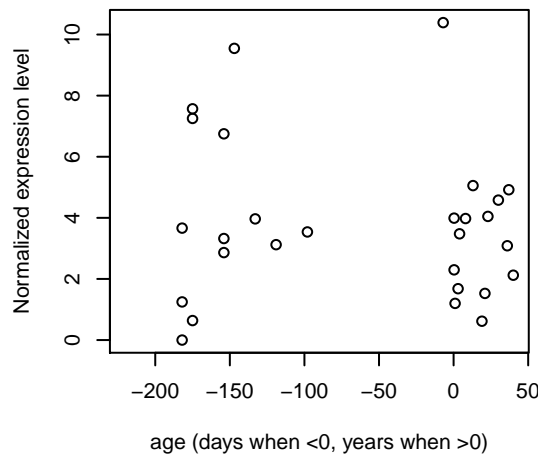

**EYA2\_45801354\_45801515**  
(P=0.3071, Diff = 0.52)  
striatum

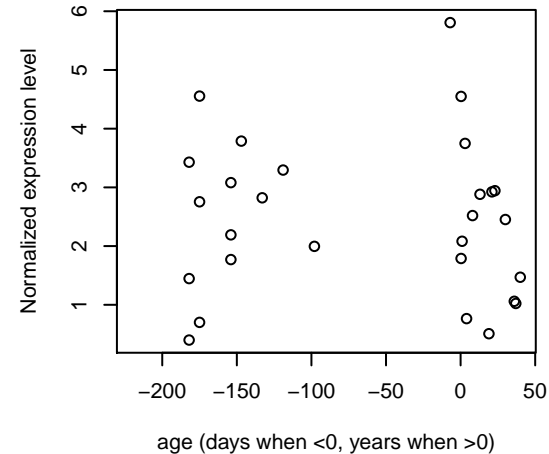

**EYA2\_45808445\_45808564**  
(P=0.5632, Diff = 0.62)  
striatum

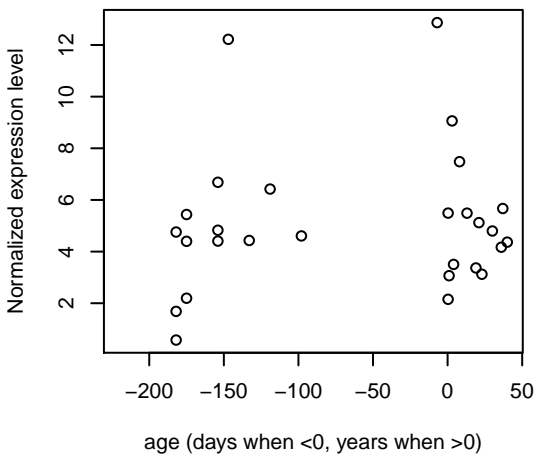

**EYA2\_45809462\_45809584**  
(P=0.8782, Diff = -0.19)  
striatum

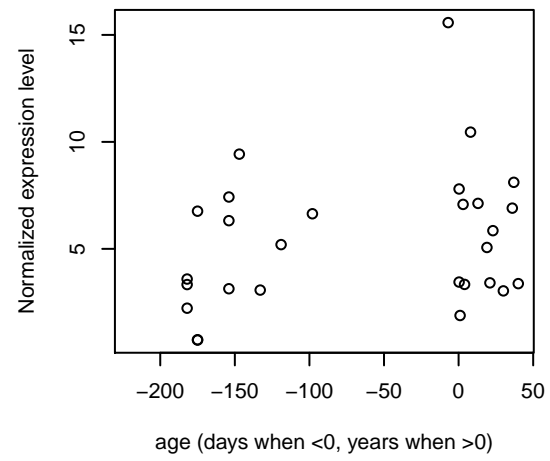

**EYA2\_45811938\_45812039**  
(P=0.7018, Diff = 0.47)  
striatum

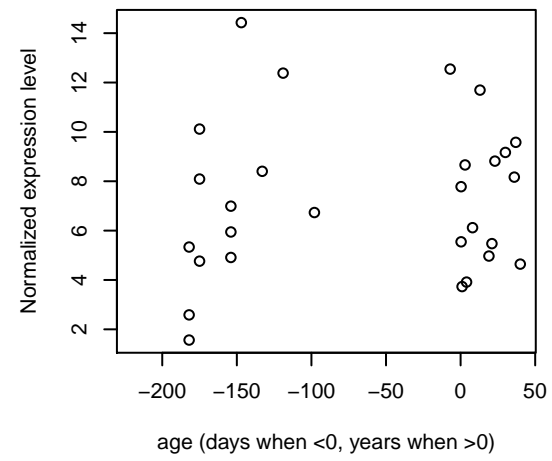

**EYA2\_45816700\_45817492**  
(P=0.5206, Diff = 0.55)  
striatum

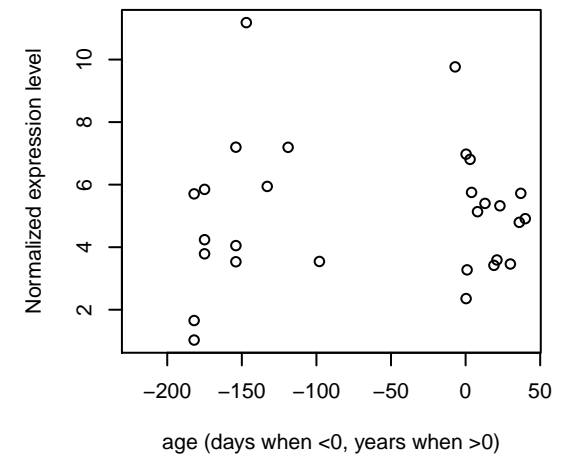

**LMCD1\_8543392\_8543666**  
(P=0.6344, Diff = -0.18)  
striatum

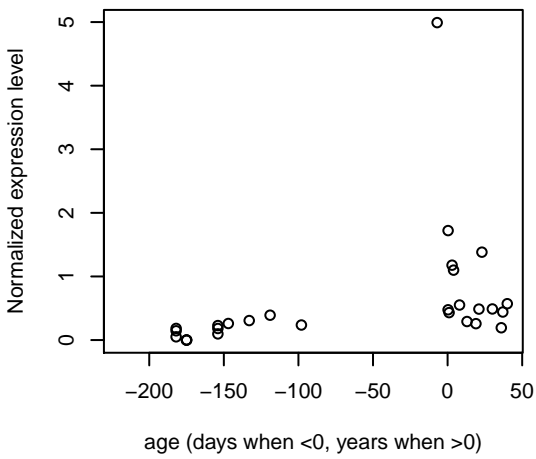

**LMCD1\_8556610\_8556681**  
(P=0.7239, Diff = -0.02)  
striatum

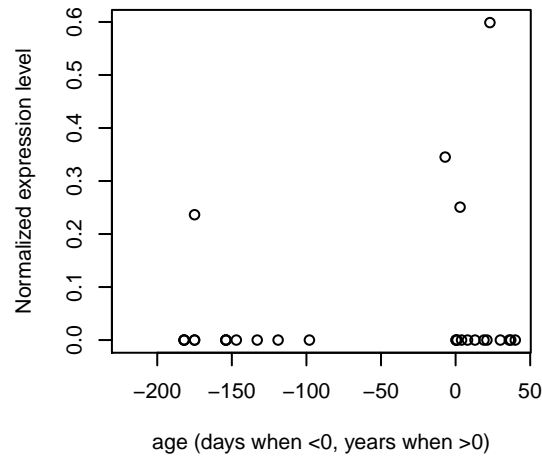

**LMCD1\_8574422\_8574511**  
(P=0.2267, Diff = -1.48)  
striatum

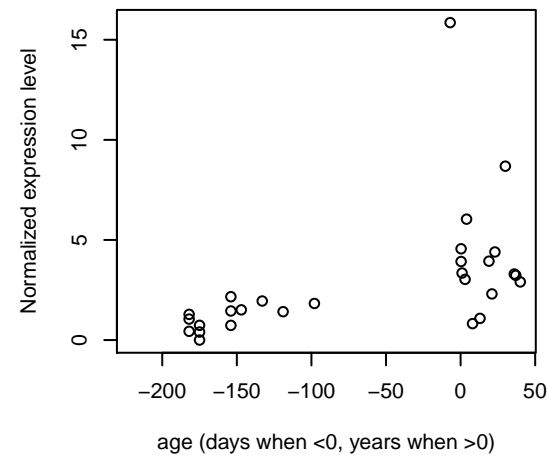

**LMCD1\_8578868\_8579204**  
(P=0.1344, Diff = -1.11)  
striatum

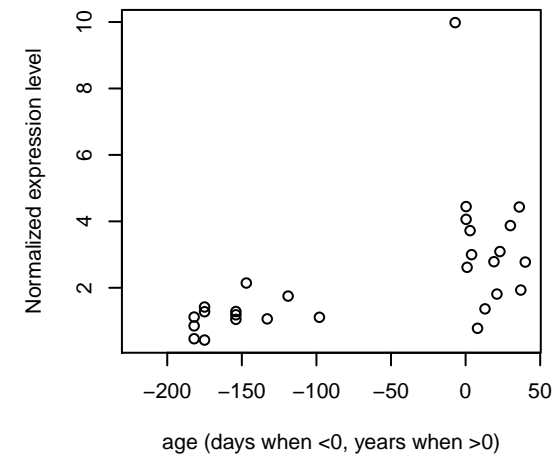

**LMCD1\_8590253\_8590589**  
(P=0.0687, Diff = -1.49)  
striatum

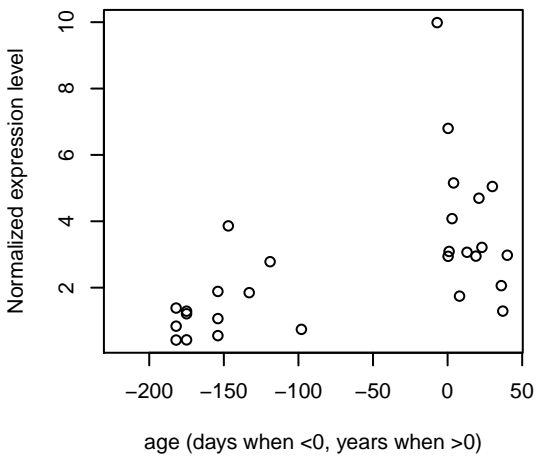

**LMCD1\_8591559\_8592135**  
(P=0.6239, Diff = -0.03)  
striatum

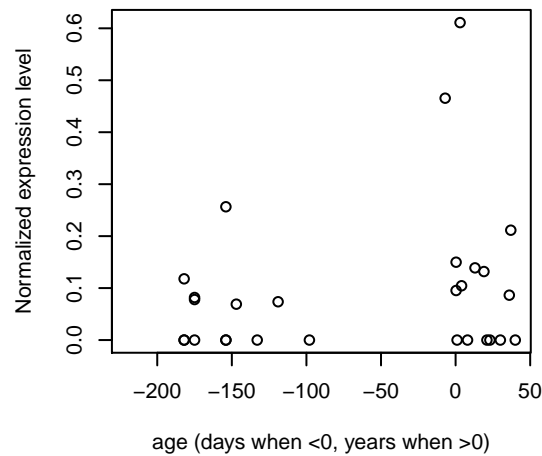

**LMCD1\_8607117\_8607333**  
(P=0.0333, Diff = -1.38)  
striatum

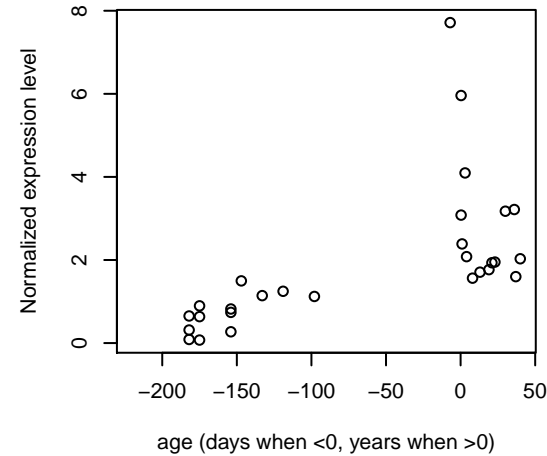

**LMCD1\_8609125\_8609805**  
(P=0.0072, Diff = -2.35)  
striatum

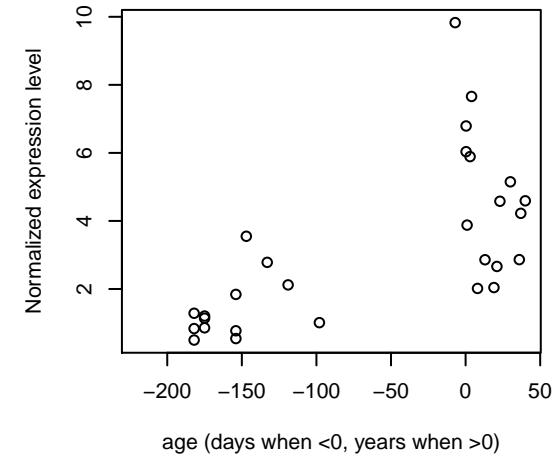



**WVOX\_78133550\_78133782**  
(P=0.8158, Diff = -0.19)  
striatum

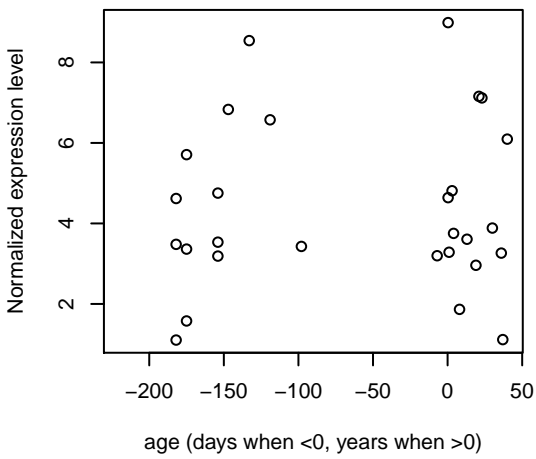

**WVOX\_78142319\_78142384**  
(P=0.0164, Diff = -2.49)  
striatum

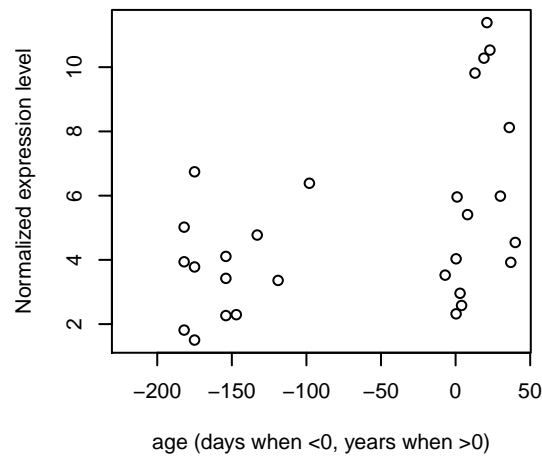

**WVOX\_78143674\_78143732**  
(P=0.0355, Diff = -2.11)  
striatum

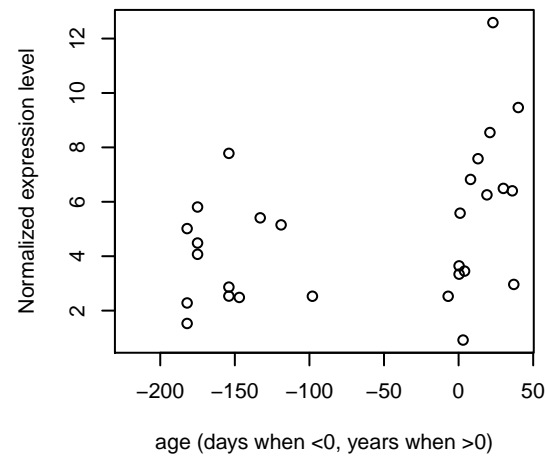

**WVOX\_78148872\_78149051**  
(P=0.1136, Diff = -1.35)  
striatum

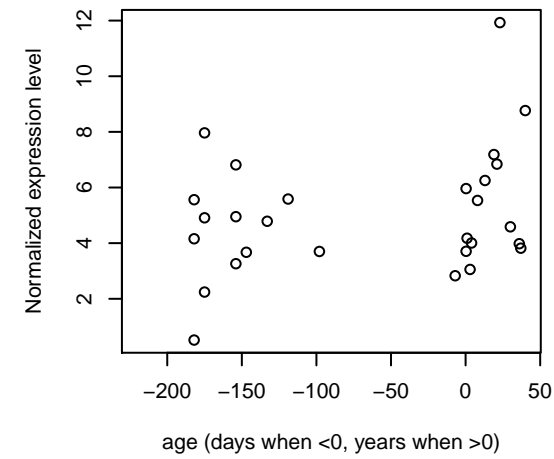

**WVOX\_78198079\_78198186**  
(P=7e-04, Diff = -2.9)  
striatum

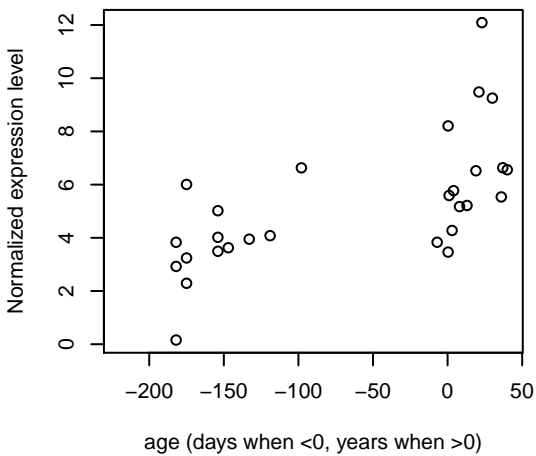

**WVOX\_78312499\_78312593**  
(P=NaN, Diff = 0)  
striatum

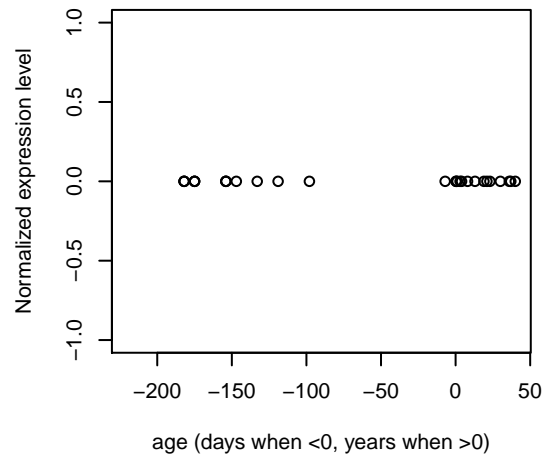

**WVOX\_78420756\_78420845**  
(P=3e-04, Diff = -5.96)  
striatum

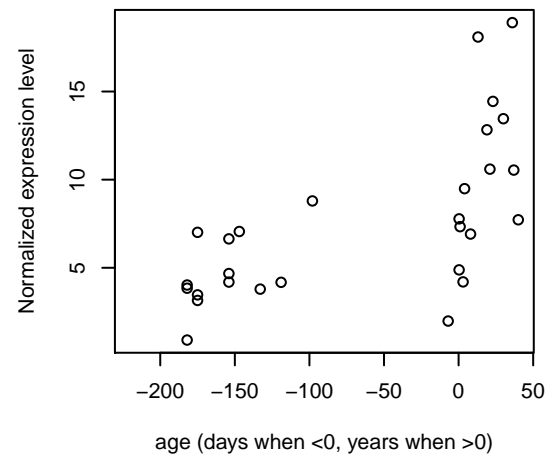

**WVOX\_78458766\_78458952**  
(P=9e-04, Diff = -5.52)  
striatum

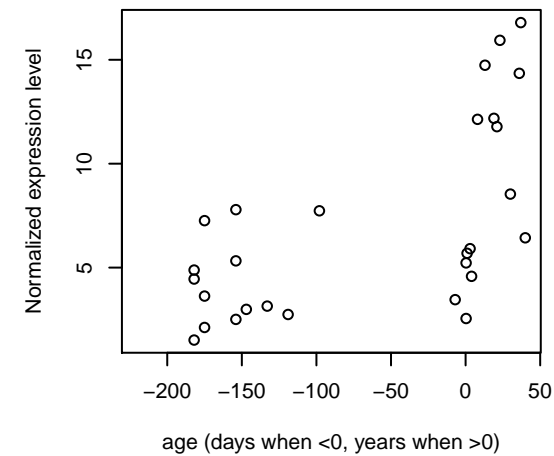

**WVOX\_78466384\_78466649**  
(P=0.0012, Diff = -3.09)  
striatum

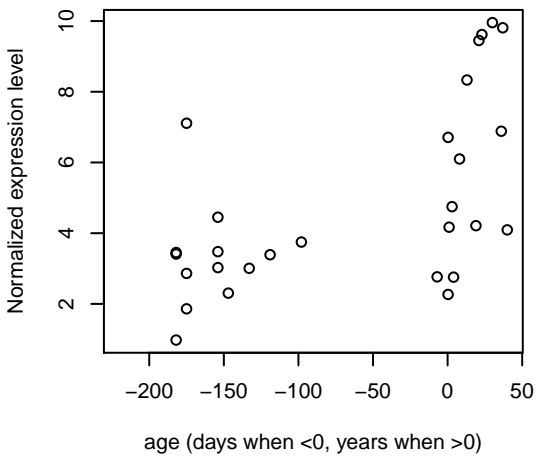

**WVOX\_78790836\_78790912**  
(P=0.3356, Diff = -0.04)  
striatum

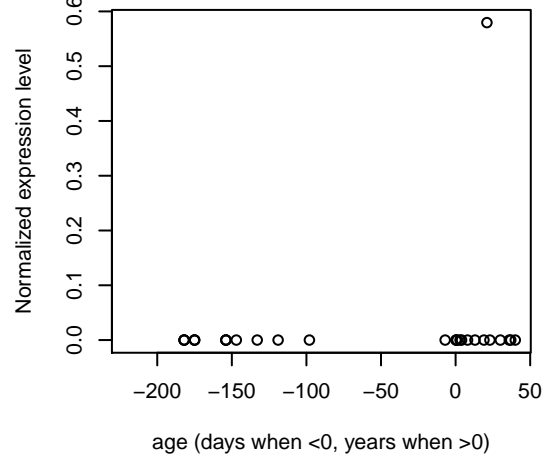

**WVOX\_79245504\_79246031**  
(P=6e-04, Diff = -3.44)  
striatum

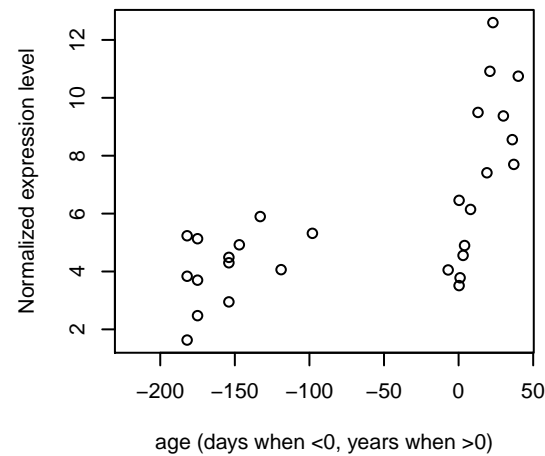

**SLC13A3\_45186462\_45188837**  
(P=0, Diff = -4.8)  
striatum

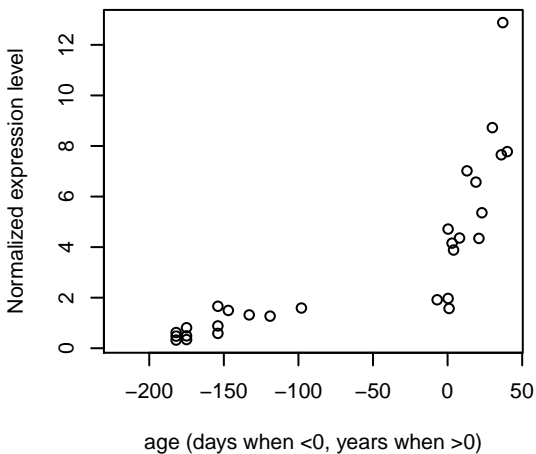

**SLC13A3\_45192052\_45192190**  
(P=1e-04, Diff = -2.78)  
striatum

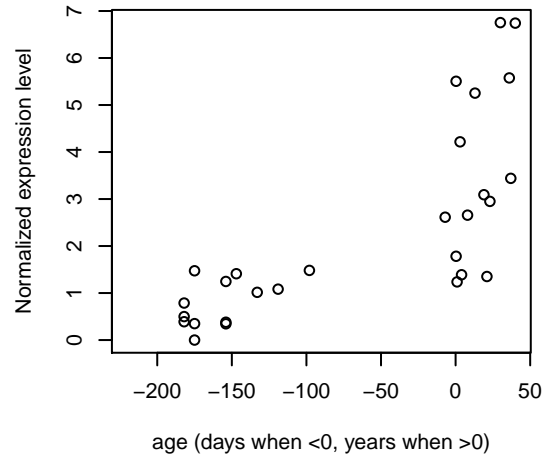

**SLC13A3\_45194867\_45195029**  
(P=0, Diff = -2.78)  
striatum

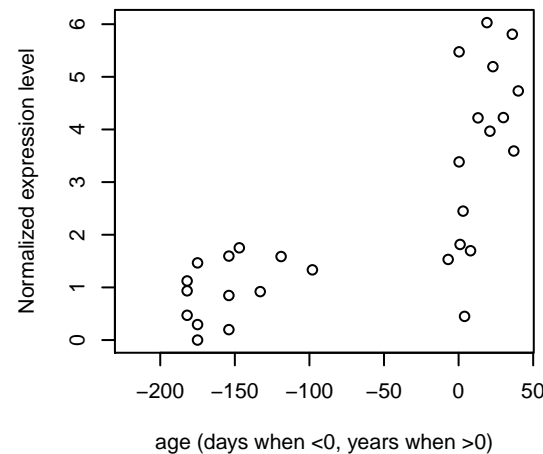

**SLC13A3\_45204211\_45204324**  
(P=6e-04, Diff = -2.39)  
striatum

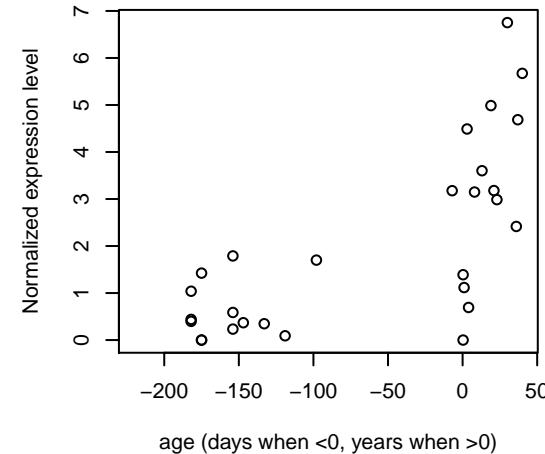

**SLC13A3\_45211549\_45212308**  
(P=0.0029, Diff = -0.31)  
striatum

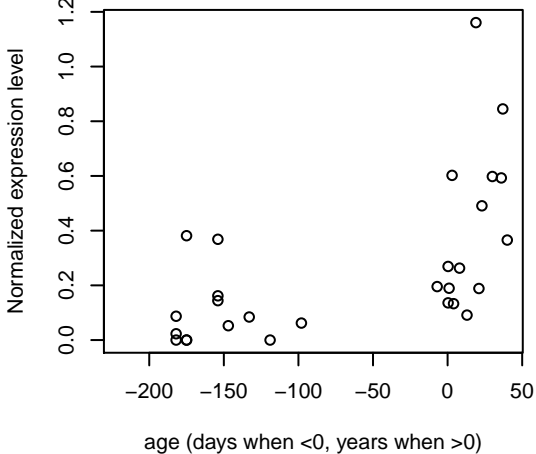

**SLC13A3\_45213986\_45214382**  
(P=0.0626, Diff = -0.16)  
striatum

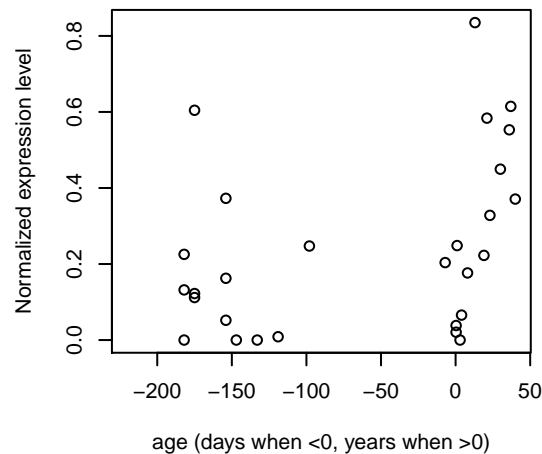

**SLC13A3\_45216697\_45216802**  
(P=6e-04, Diff = -1.98)  
striatum

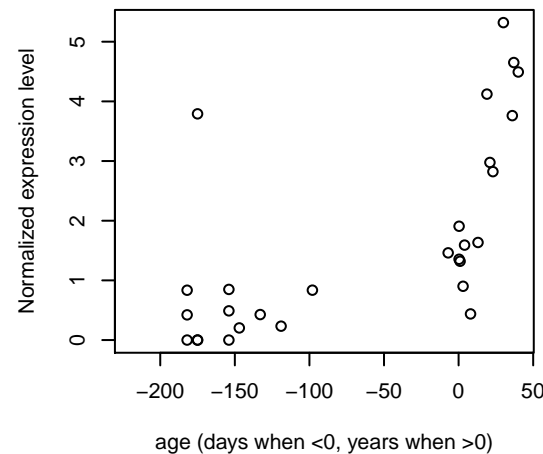

**SLC13A3\_45217798\_45217894**  
(P=2e-04, Diff = -2.79)  
striatum

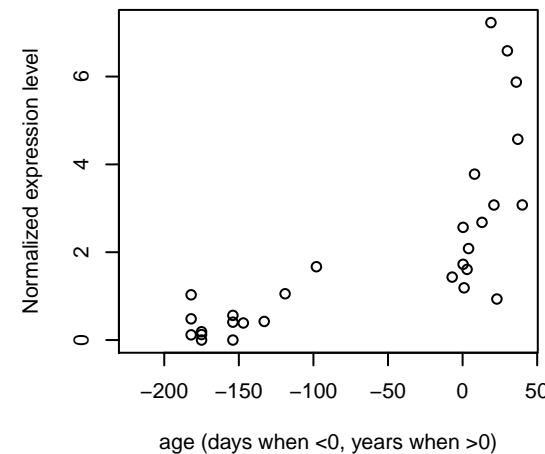

**SLC13A3\_45221042\_45221168**  
(P=1e-04, Diff = -2.69)  
striatum

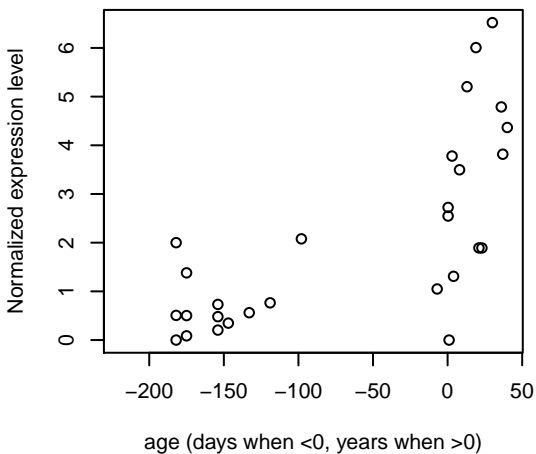

**SLC13A3\_45224795\_45224981**  
(P=4e-04, Diff = -2.97)  
striatum

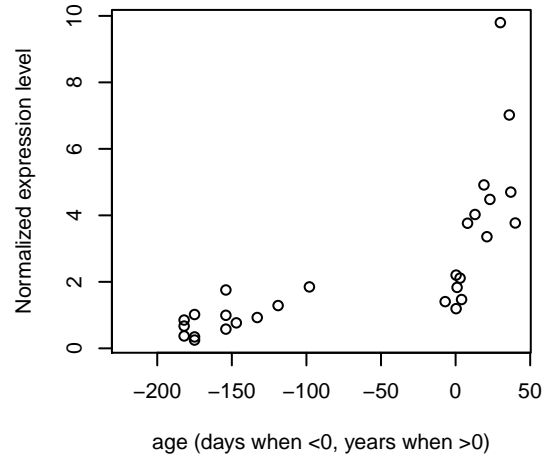

**SLC13A3\_45228609\_45228676**  
(P=2e-04, Diff = -2.25)  
striatum

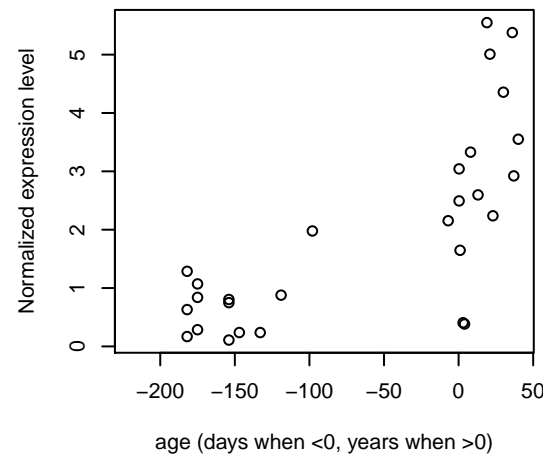

**SLC13A3\_45229226\_45229255**  
(P=0.3356, Diff = -0.15)  
striatum

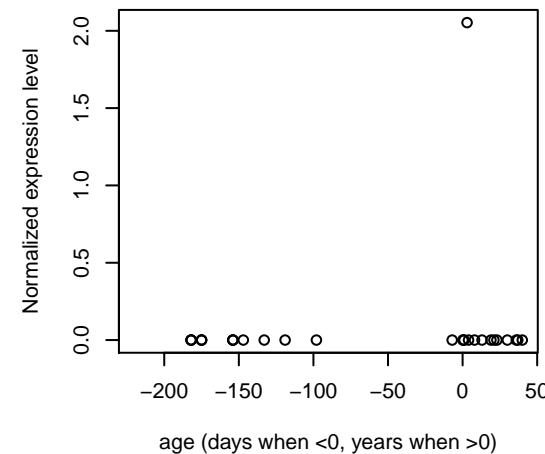

**SLC13A3\_45237347\_45237696**  
(P=0.062, Diff = -0.07)  
striatum

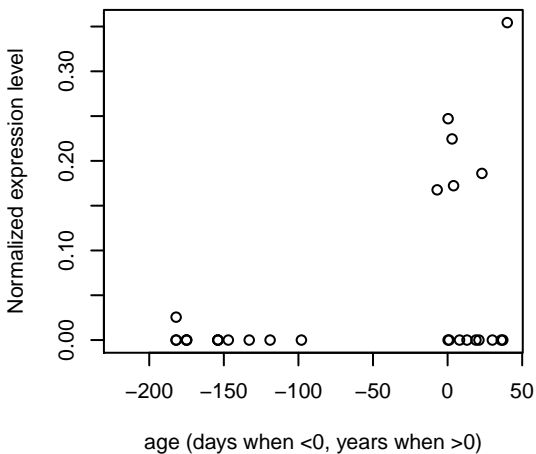

**SLC13A3\_45239084\_45239248**  
(P=0, Diff = -2.59)  
striatum

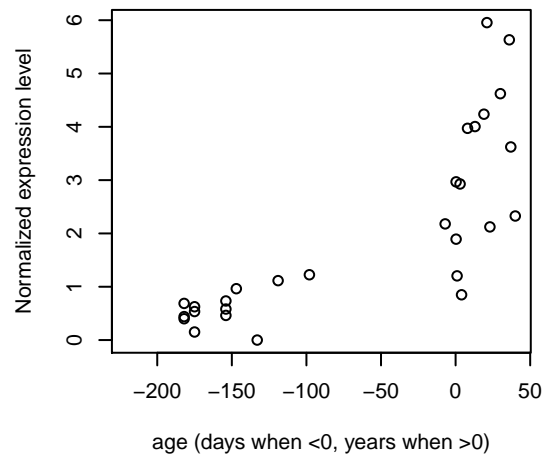

**SLC13A3\_45242098\_45242525**  
(P=0.0014, Diff = -0.84)  
striatum

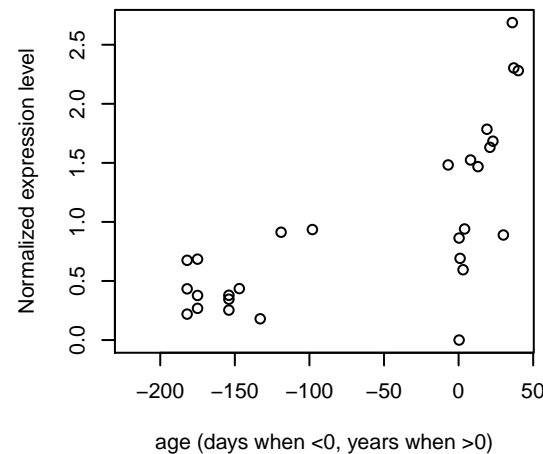

**SLC13A3\_45279949\_45280098**  
(P=0.0508, Diff = -0.27)  
striatum

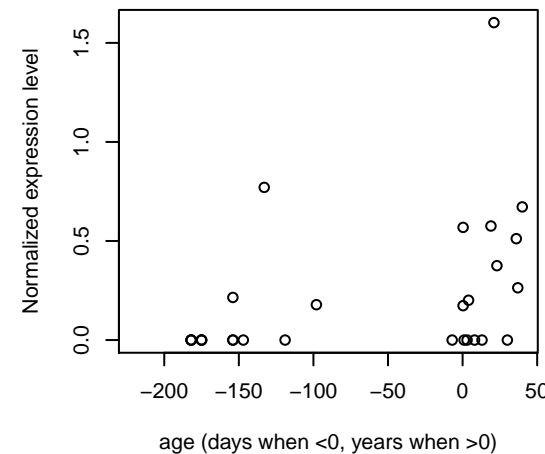

**SLC13A3\_45298681\_45298778**  
(P=0.0249, Diff = 0.36)  
striatum

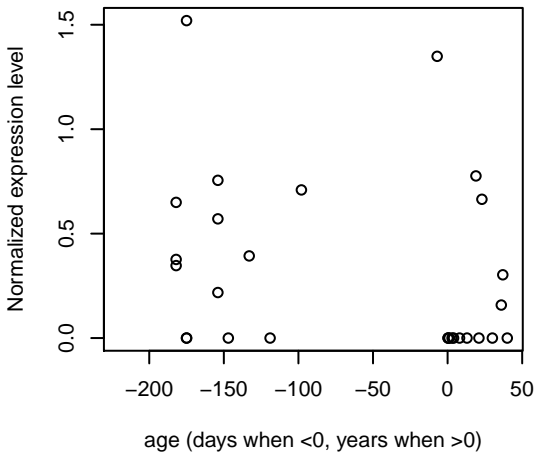

**SLC13A3\_45302302\_45302417**  
(P=0.2558, Diff = -0.24)  
striatum

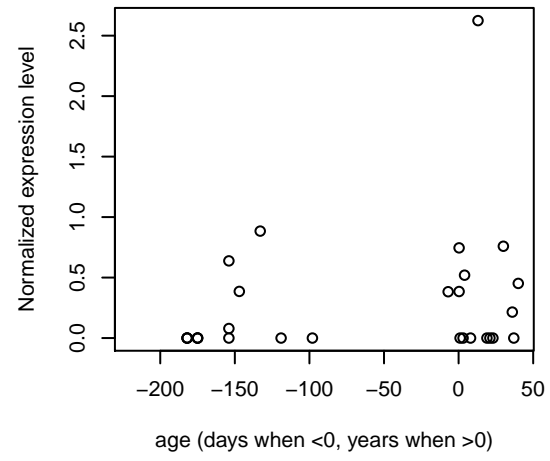

**SLC13A3\_45304585\_45304714**  
(P=0.1357, Diff = -0.17)  
striatum

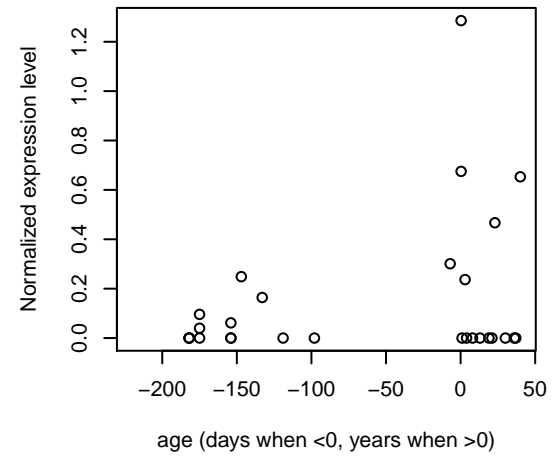

HTR1B\_78171947\_78173490  
(P=0.2351, Diff = -0.44)  
striatum

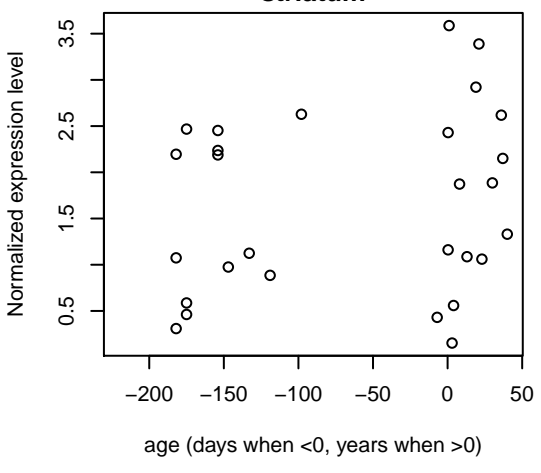

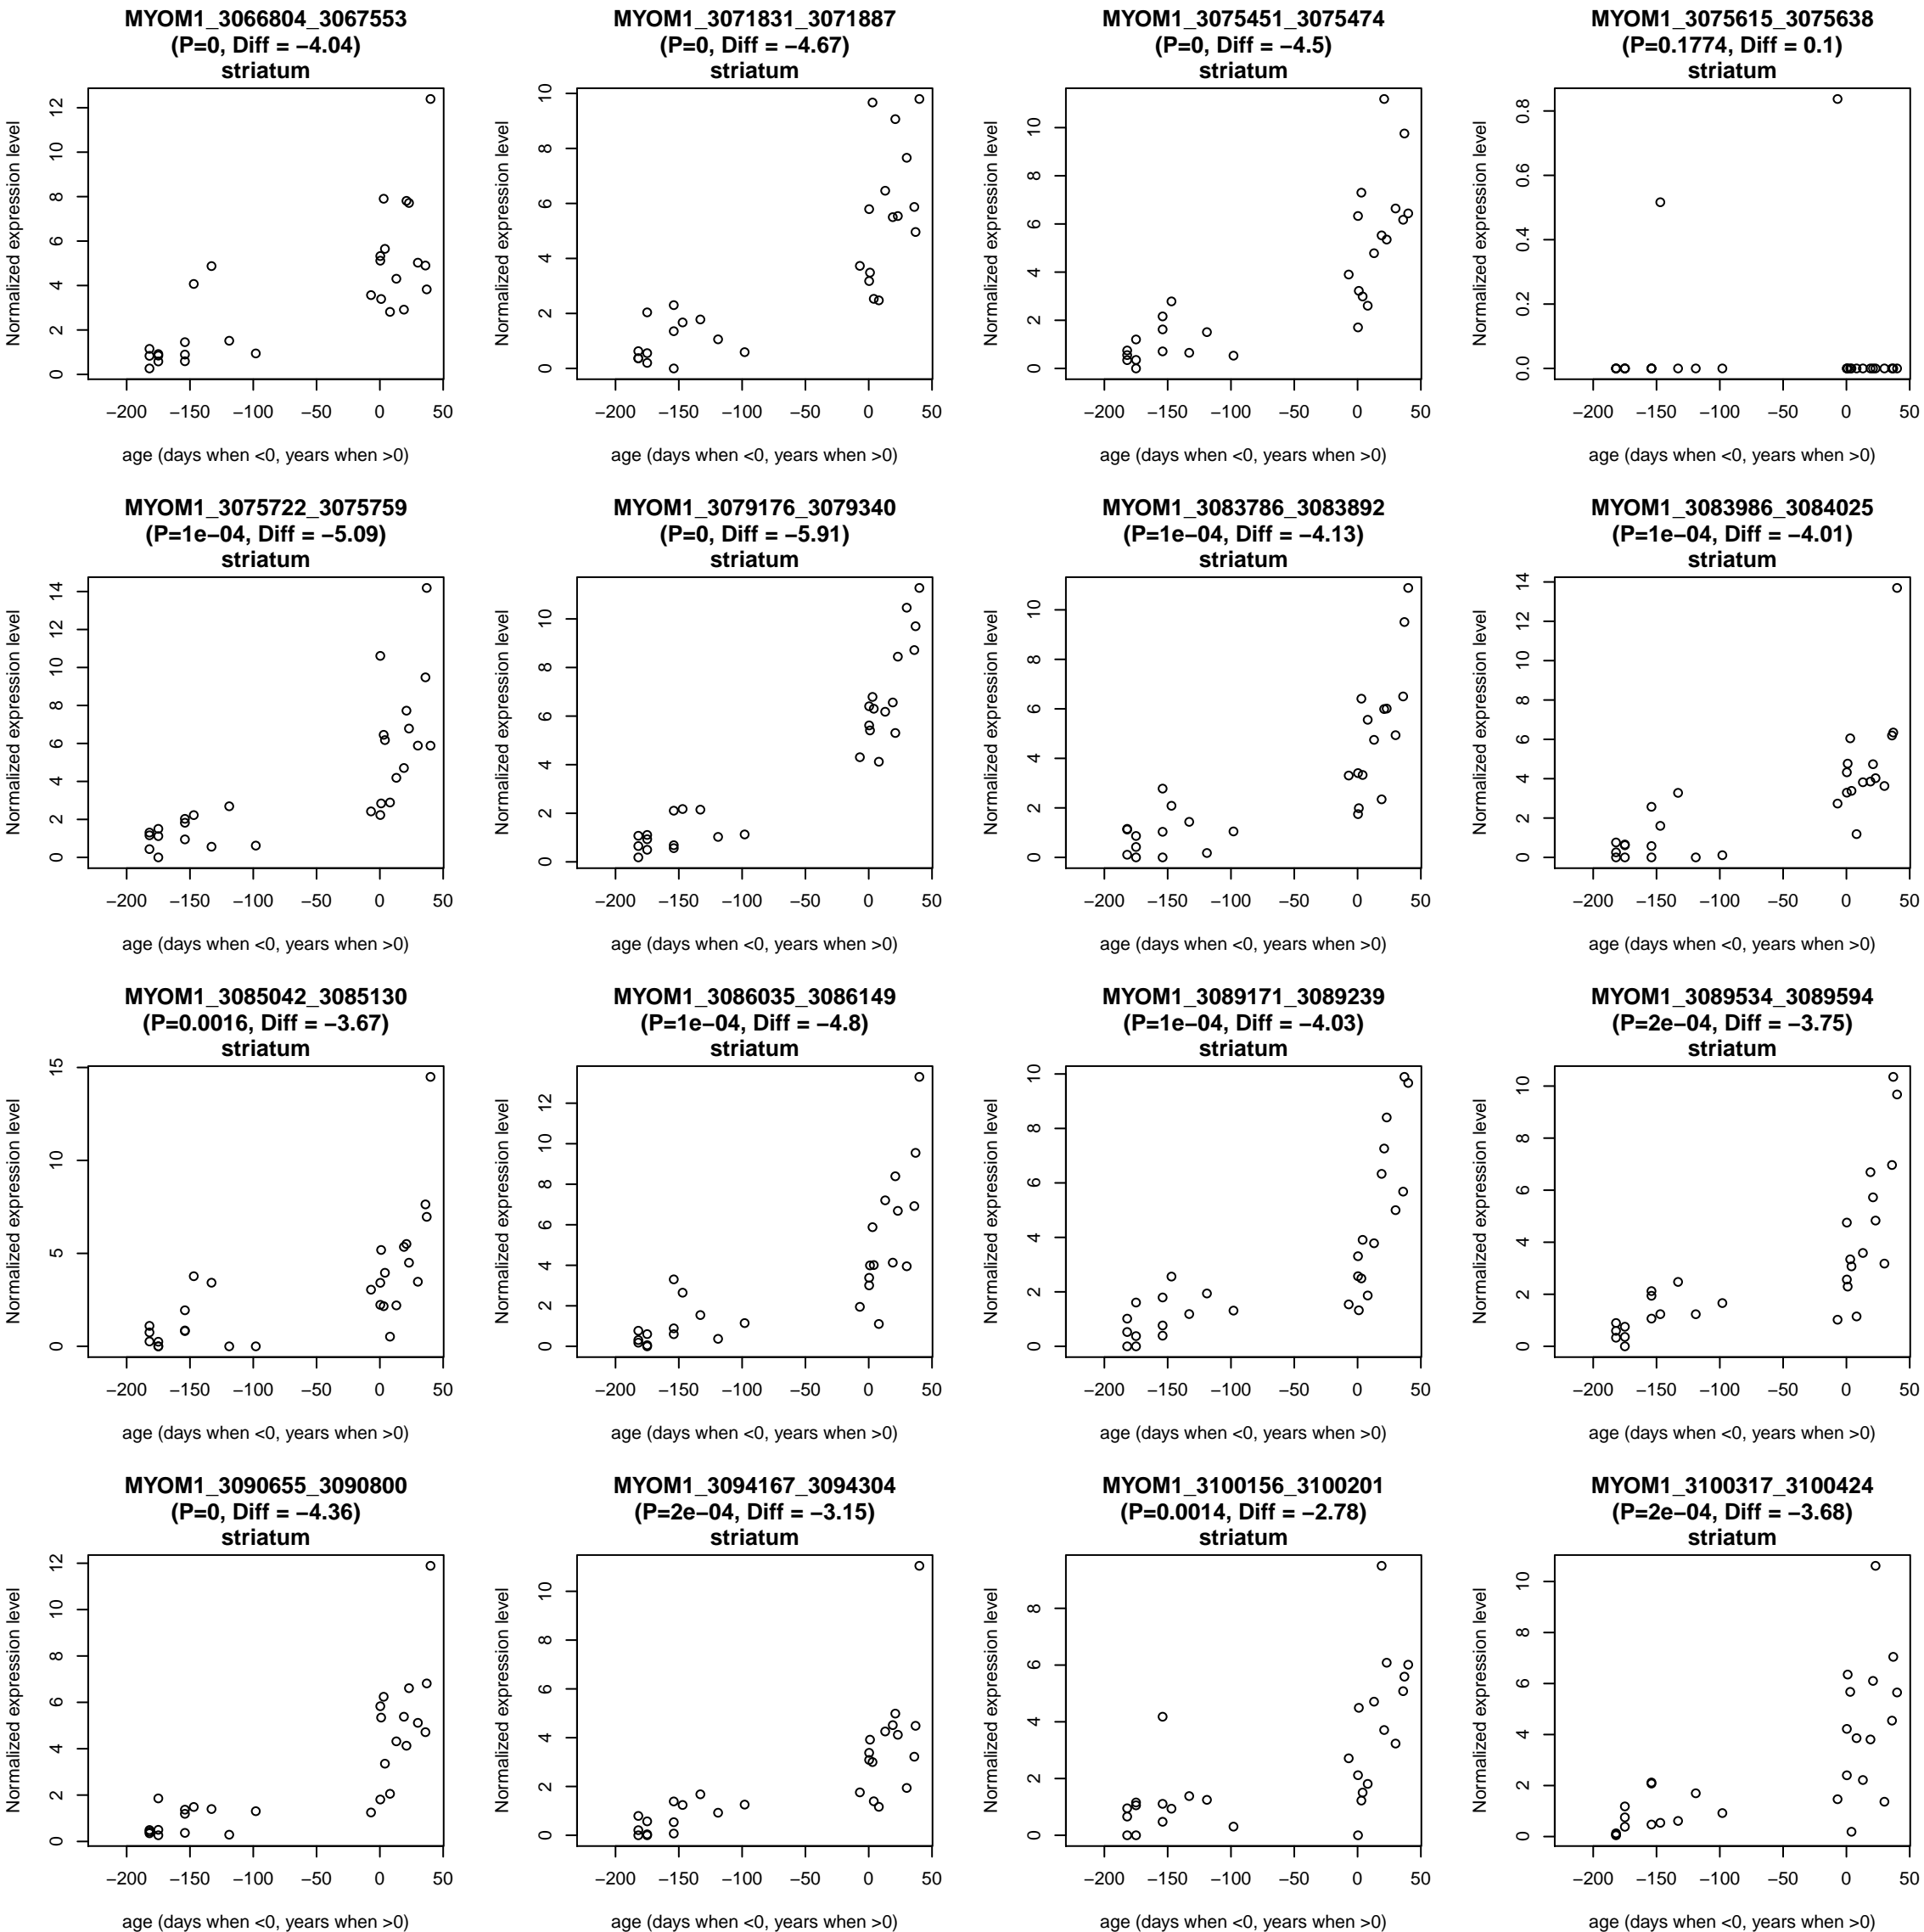

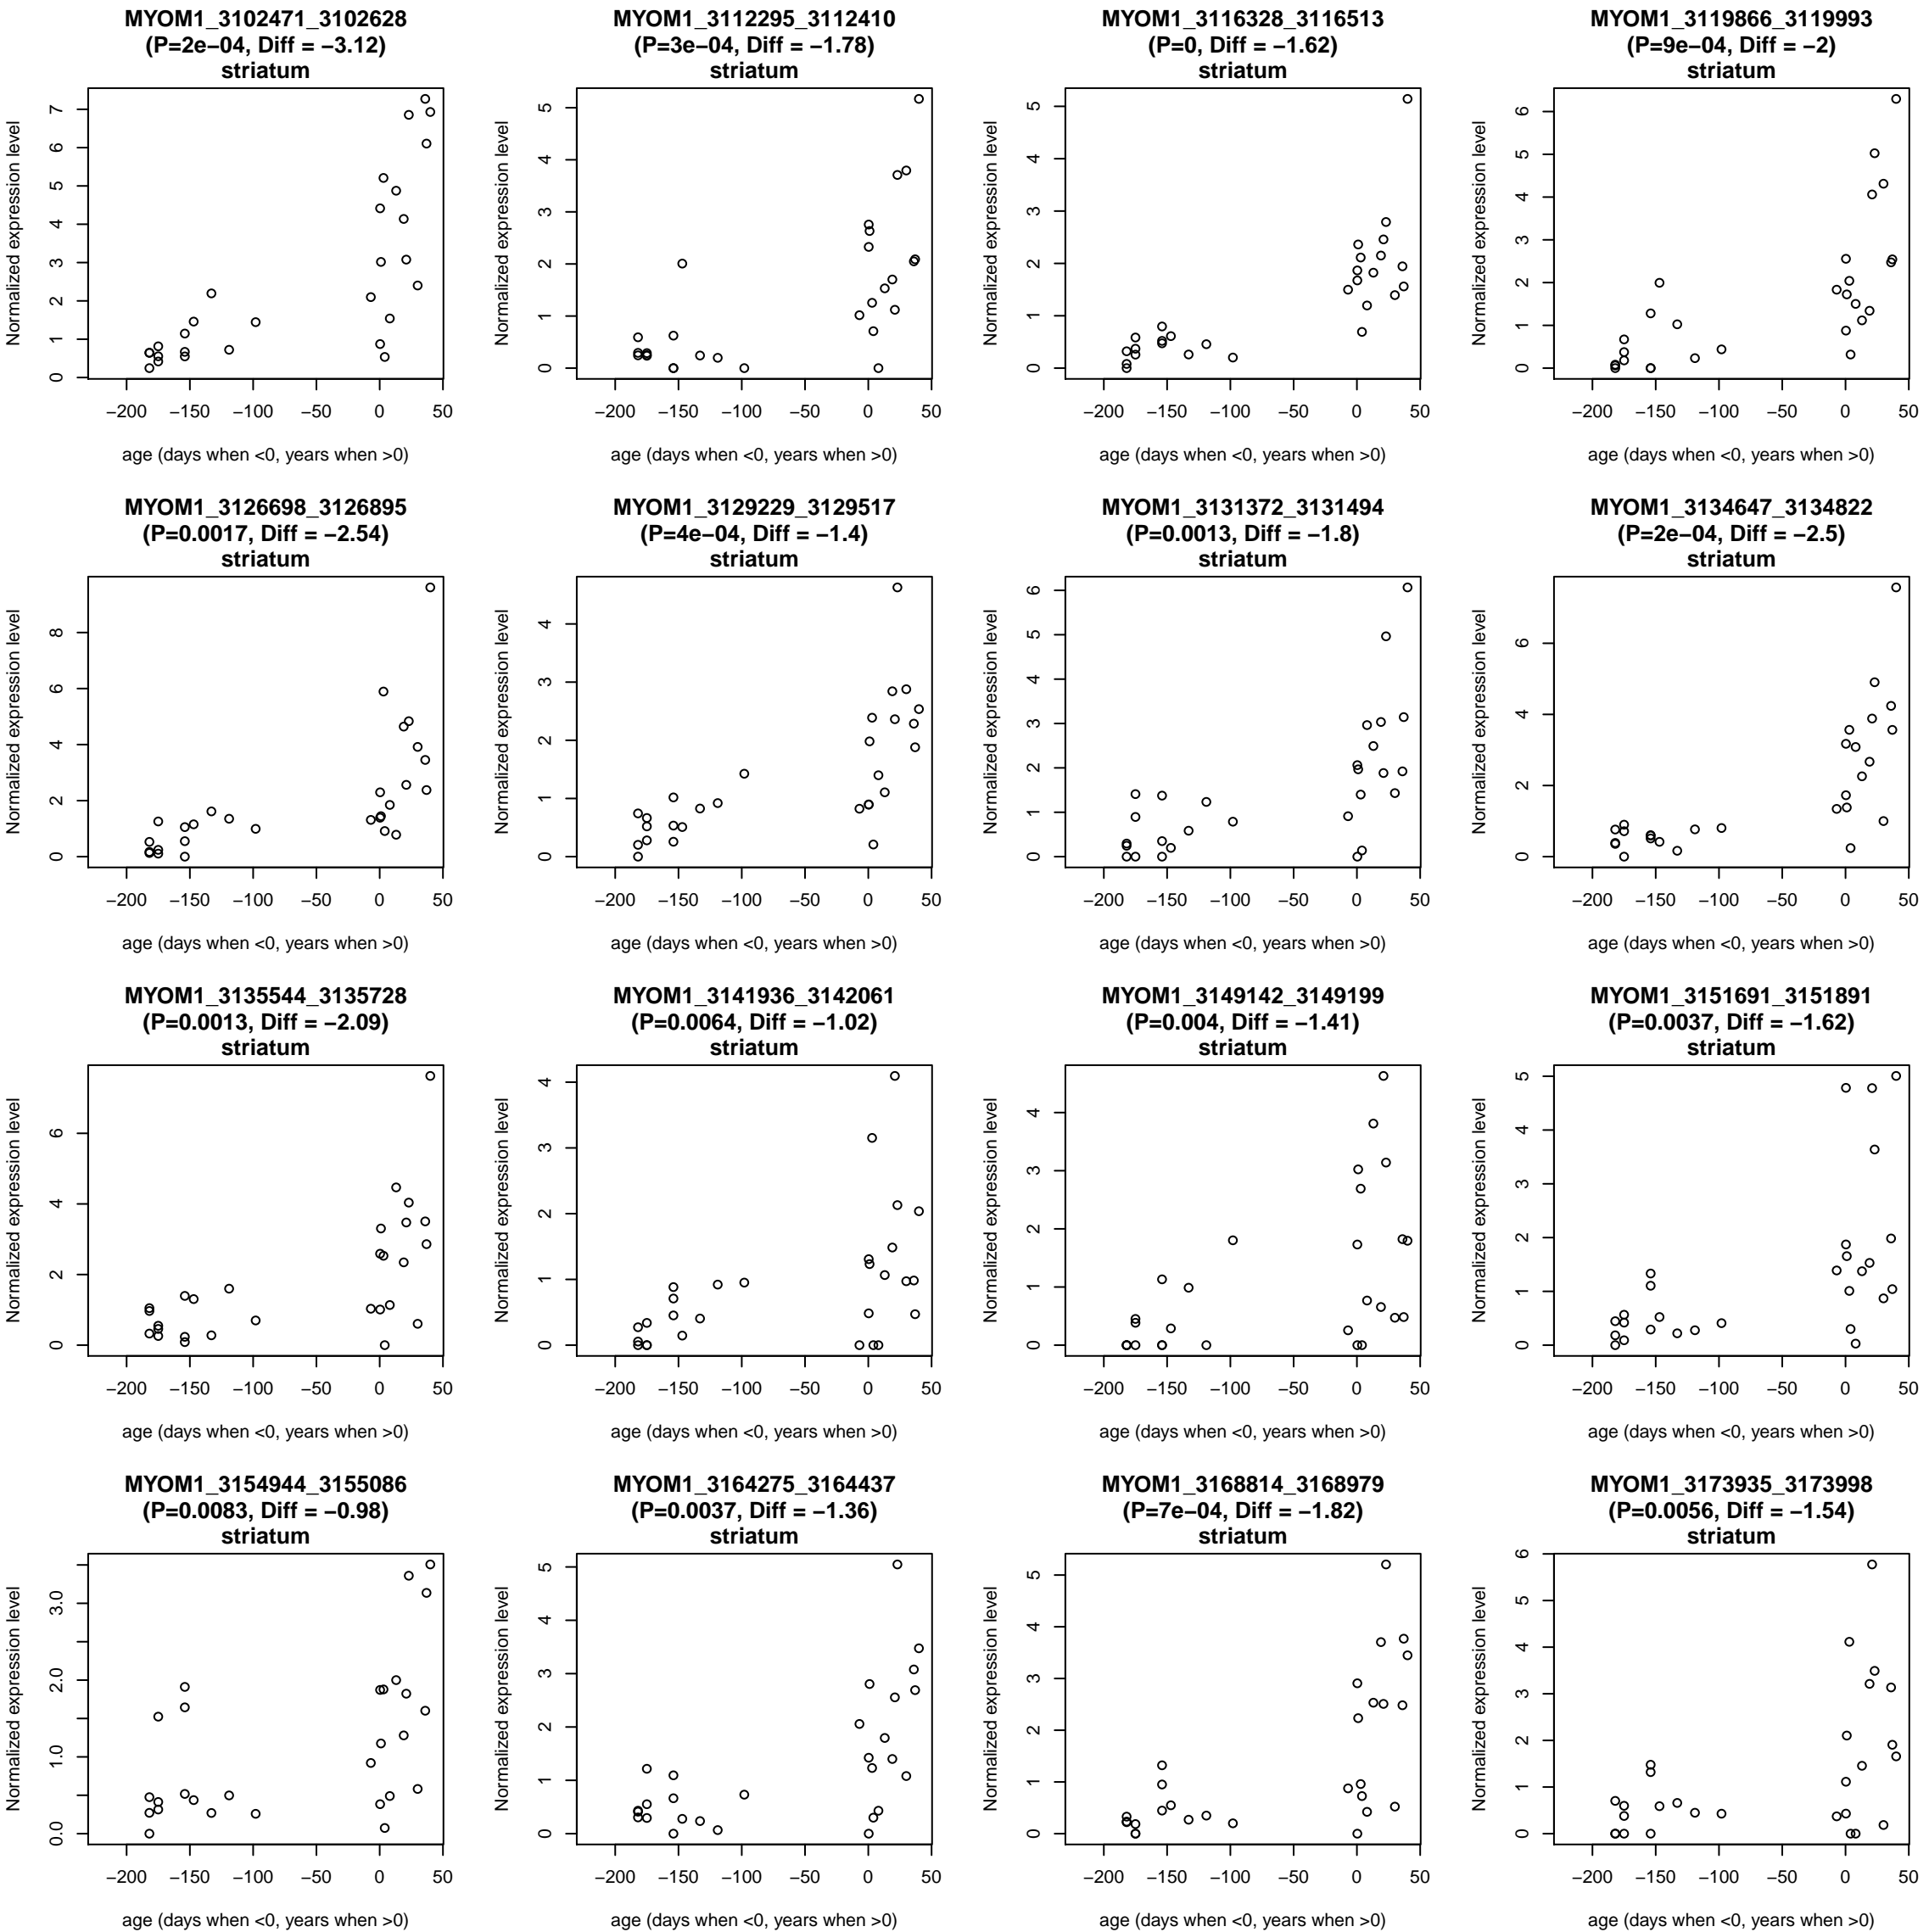

**MYOM1\_3174117\_3174206**  
(P=0.0071, Diff = -1.31)  
striatum

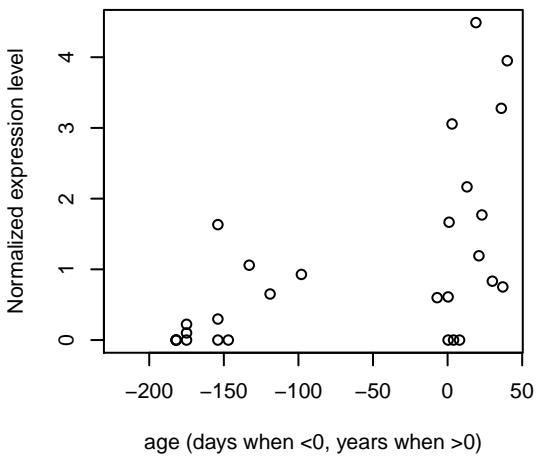

**MYOM1\_3176039\_3176132**  
(P=0.0022, Diff = -1.3)  
striatum

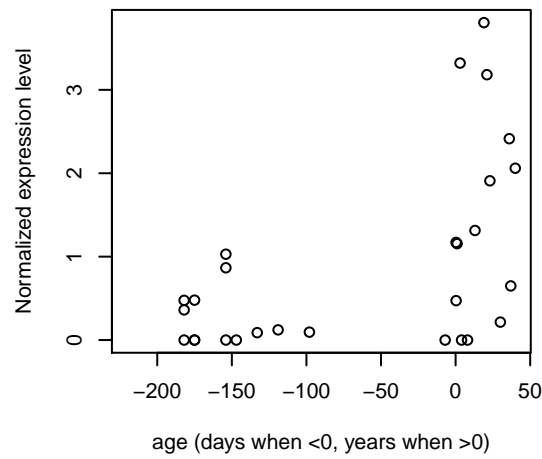

**MYOM1\_3187477\_3187635**  
(P=0.0036, Diff = -0.94)  
striatum

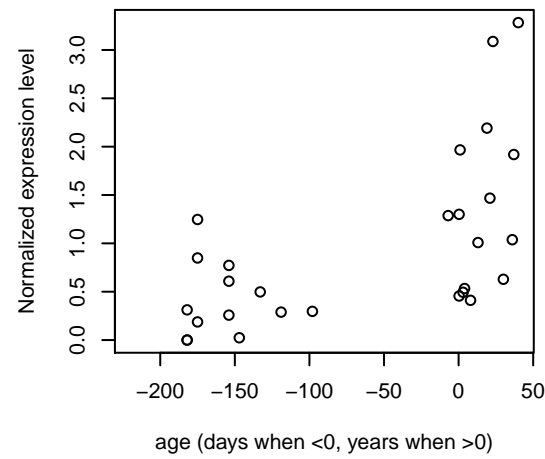

**MYOM1\_3188745\_3189085**  
(P=0.0011, Diff = -1.34)  
striatum

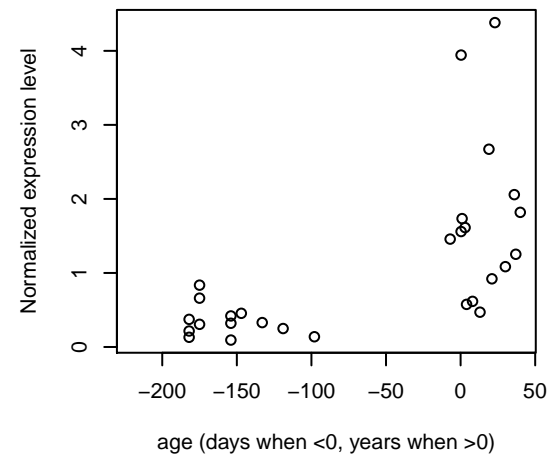

**MYOM1\_3193815\_3193956**  
(P=5e-04, Diff = -1.55)  
striatum

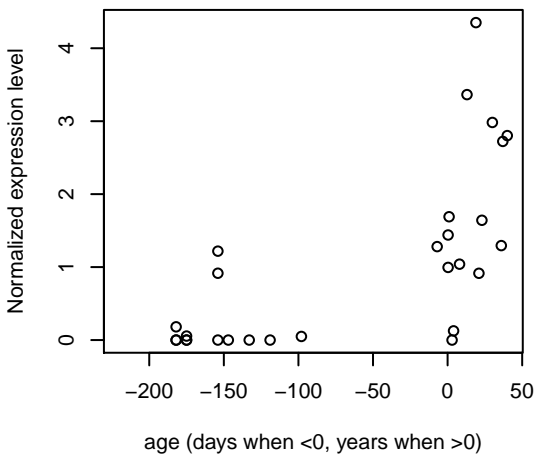

**MYOM1\_3214931\_3215249**  
(P=0.0095, Diff = -0.58)  
striatum

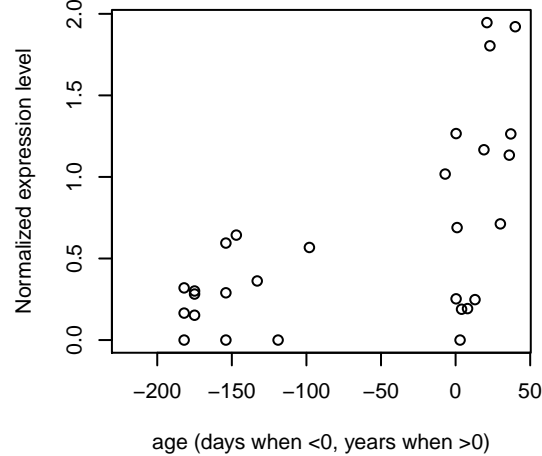

**MYOM1\_3219800\_3220106**  
(P=0.0582, Diff = -0.09)  
striatum

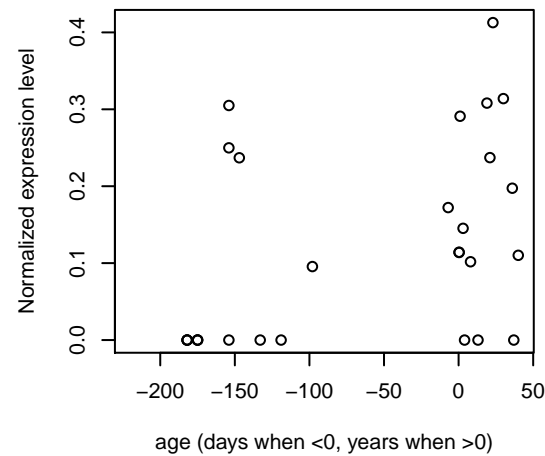

**USP44\_95910335\_95912129**  
(P=0.0022, Diff = 0.21)  
striatum

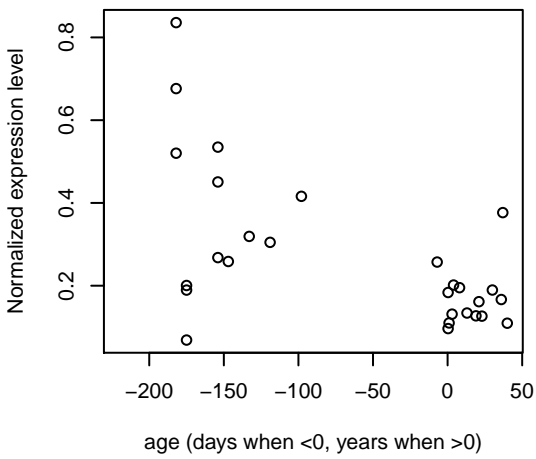

**USP44\_95914772\_95914978**  
(P=0.0092, Diff = 0.41)  
striatum

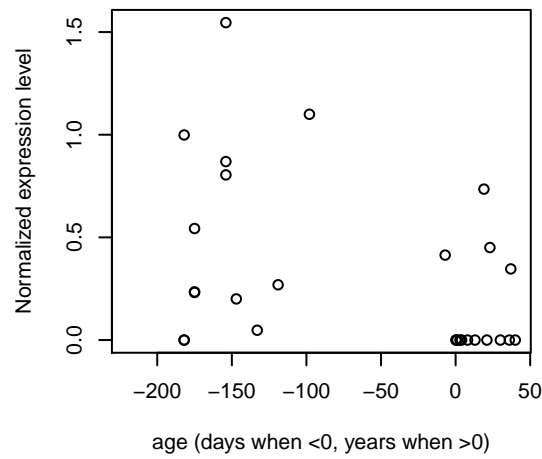

**USP44\_95918295\_95918564**  
(P=0.3073, Diff = 0.05)  
striatum

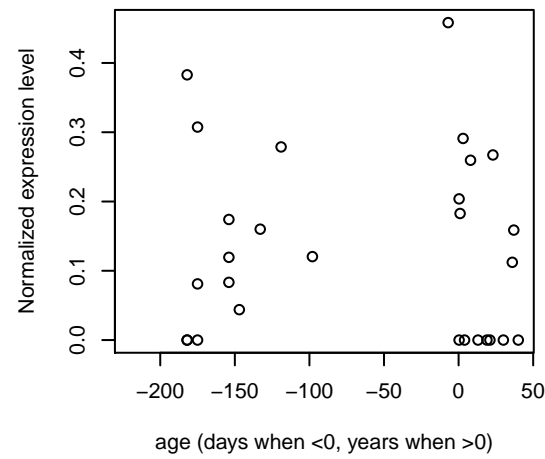

**USP44\_95922582\_95922778**  
(P=0.0034, Diff = 0.24)  
striatum

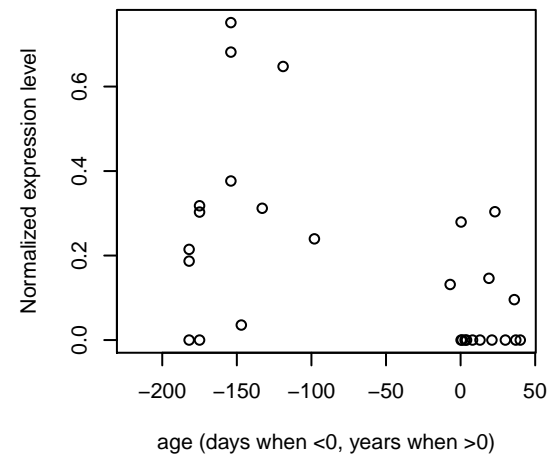

**USP44\_95926604\_95928102**  
(P=0.0024, Diff = 0.26)  
striatum

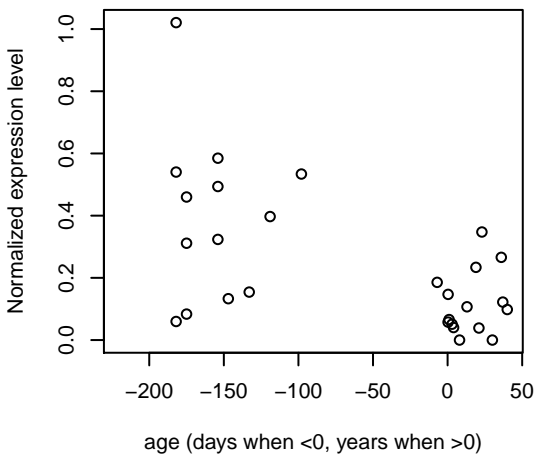

**USP44\_95929148\_95929202**  
(P=NaN, Diff = 0)  
striatum



**USP44\_95940225\_95940766**  
(P=0.3494, Diff = -0.04)  
striatum

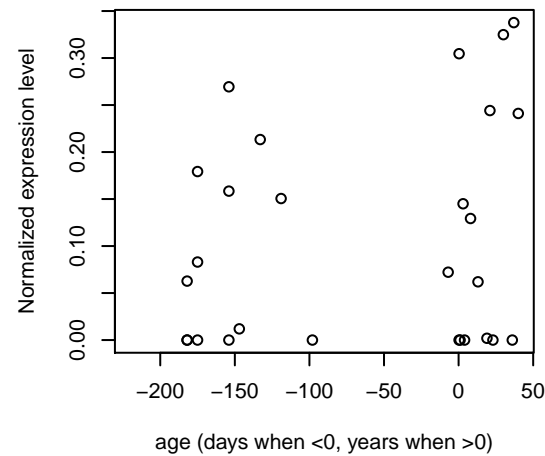

**USP44\_95941758\_95942048**  
(P=0.3763, Diff = 0.04)  
striatum

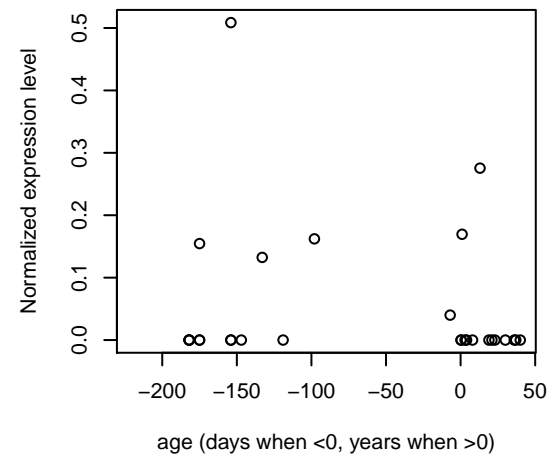

**USP44\_95942301\_95942620**  
(P=0.3997, Diff = 0.05)  
striatum

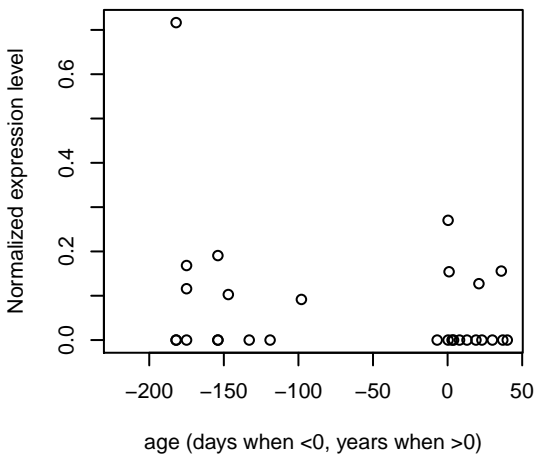

**USP44\_95945047\_95945266**  
(P=NaN, Diff = 0)  
striatum

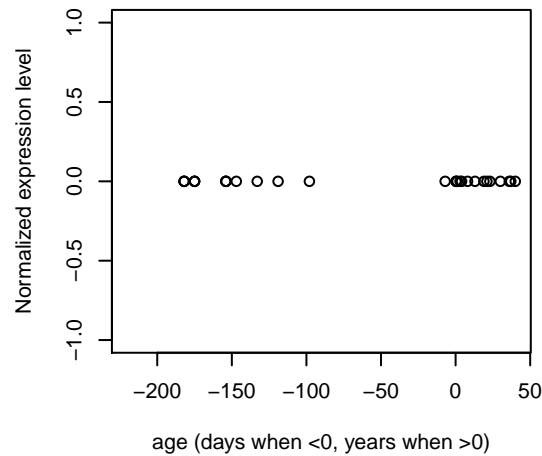



**IGFBP7\_57896938\_57897502**  
(P=0.053, Diff = -19.49)  
striatum

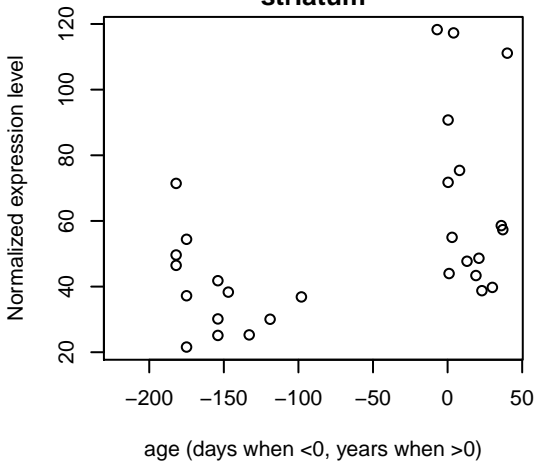

**IGFBP7\_57898203\_57898718**  
(P=0.0683, Diff = -23.5)  
striatum

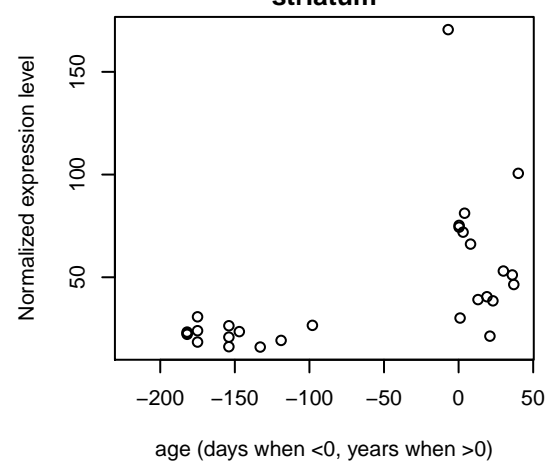

**IGFBP7\_57899360\_57899477**  
(P=0.2325, Diff = -69.82)  
striatum

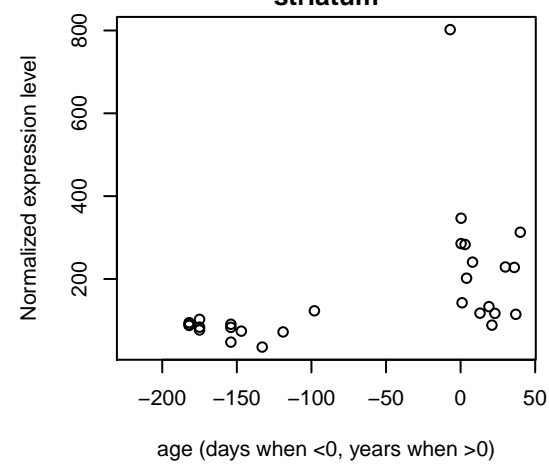

**IGFBP7\_57906989\_57907099**  
(P=0.2203, Diff = -69.38)  
striatum

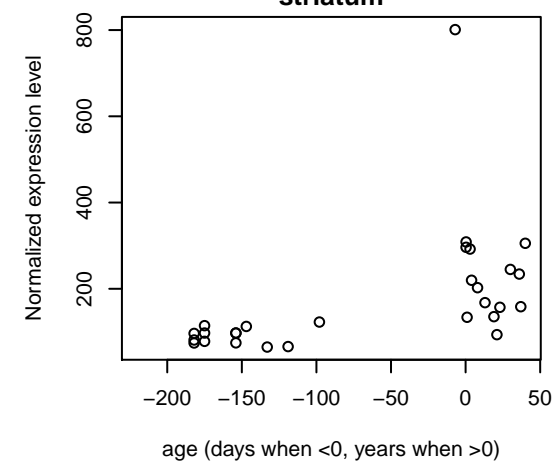

**IGFBP7\_57976042\_57976551**  
(P=0.9799, Diff = 0.48)  
striatum

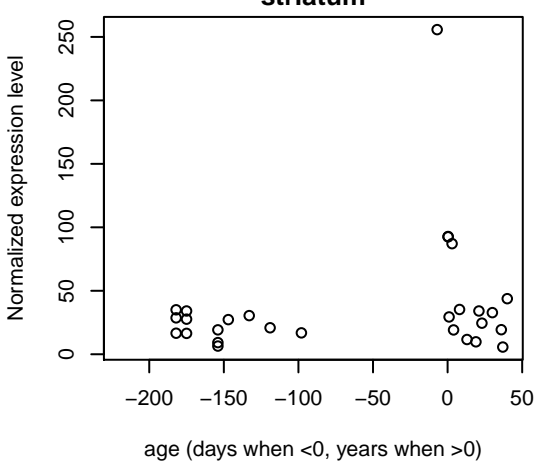

**OPA1\_193310932\_193311198**  
(P=0.0141, Diff = 3.68)  
striatum

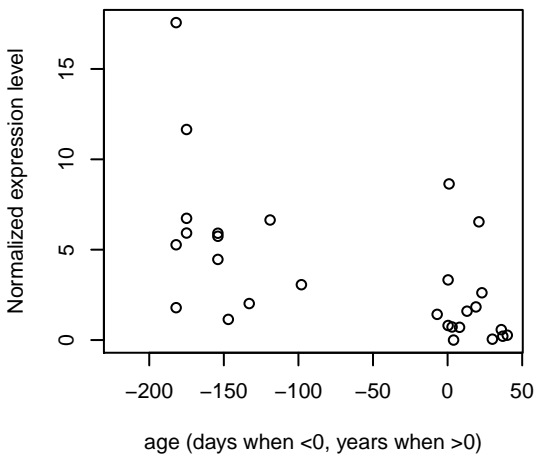

**OPA1\_193321288\_193321346**  
(P=0.4382, Diff = -0.04)  
striatum

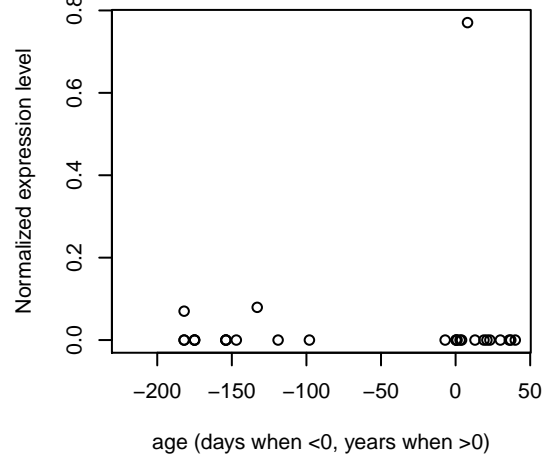

**OPA1\_193332511\_193332830**  
(P=0.3695, Diff = 2.61)  
striatum

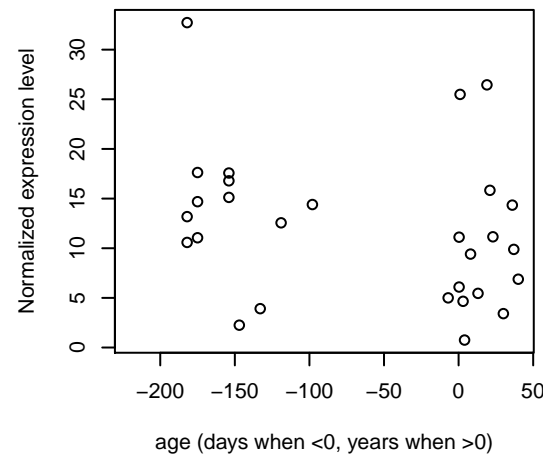

**OPA1\_193333462\_193333559**  
(P=0.0805, Diff = 5.63)  
striatum

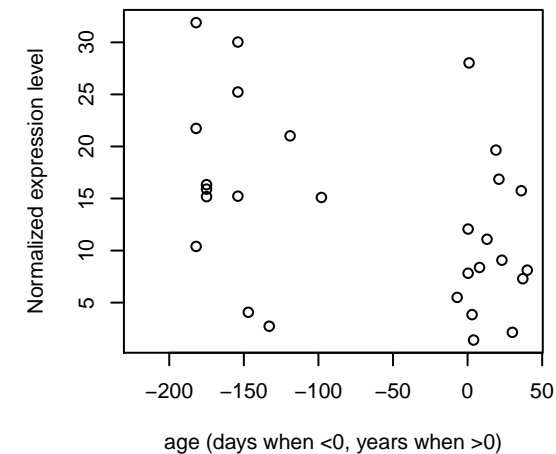

**OPA1\_193334966\_193335074**  
(P=0.3118, Diff = 3.64)  
striatum

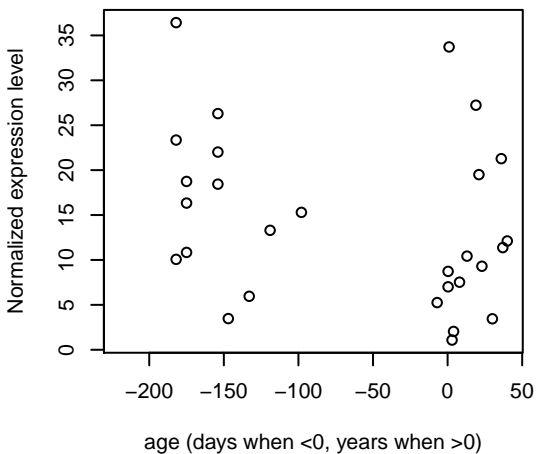

**OPA1\_193335572\_193335626**  
(P=0.2684, Diff = -0.51)  
striatum

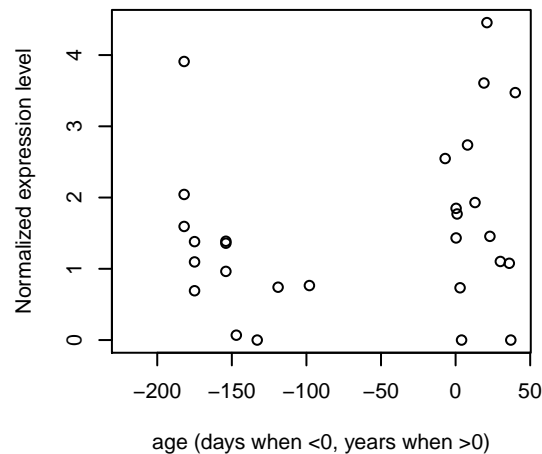

**OPA1\_193336615\_193336726**  
(P=0.3522, Diff = 2.11)  
striatum

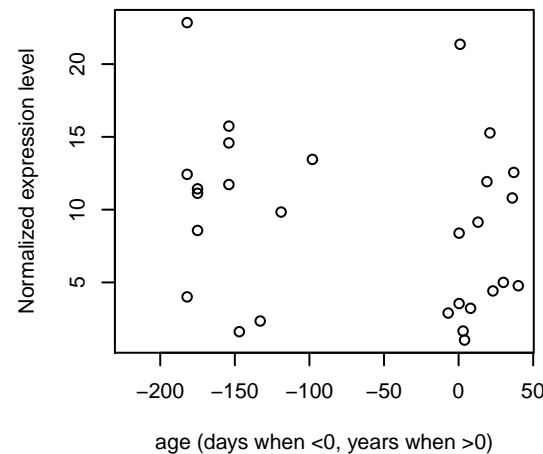

**OPA1\_193343846\_193343991**  
(P=0.0467, Diff = 1.12)  
striatum

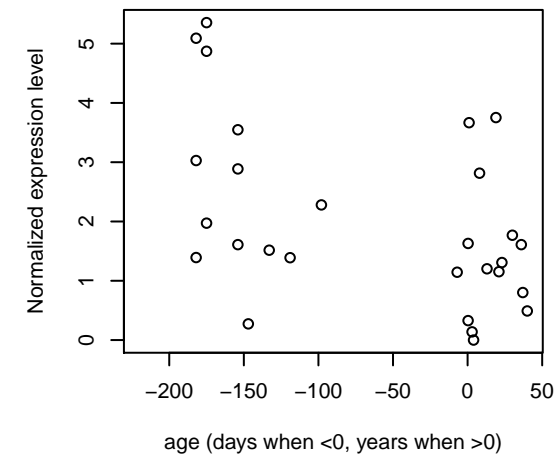

**OPA1\_193346297\_193346333**  
(P=0.5662, Diff = 0.05)  
striatum

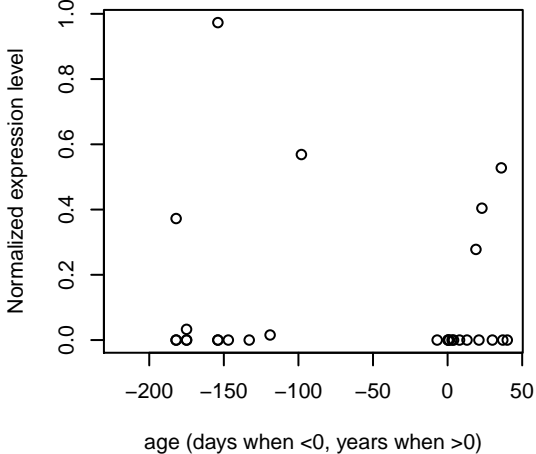

**OPA1\_193349400\_193349454**  
(P=0.1863, Diff = 4.39)  
striatum

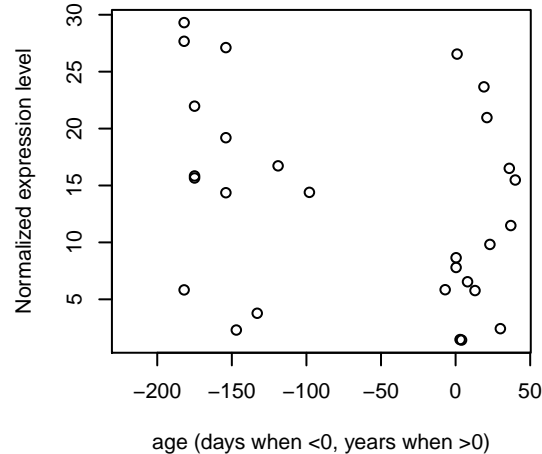

**OPA1\_193353206\_193353311**  
(P=0.4011, Diff = 2.66)  
striatum

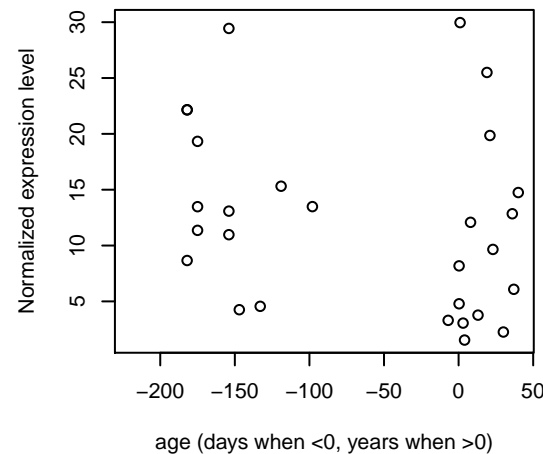

**OPA1\_193354983\_193355070**  
(P=0.24, Diff = 5)  
striatum

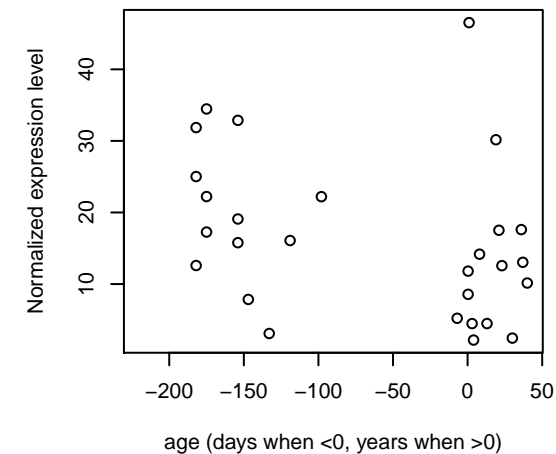

**OPA1\_193355740\_193355854**  
(P=0.1719, Diff = 5.99)  
striatum

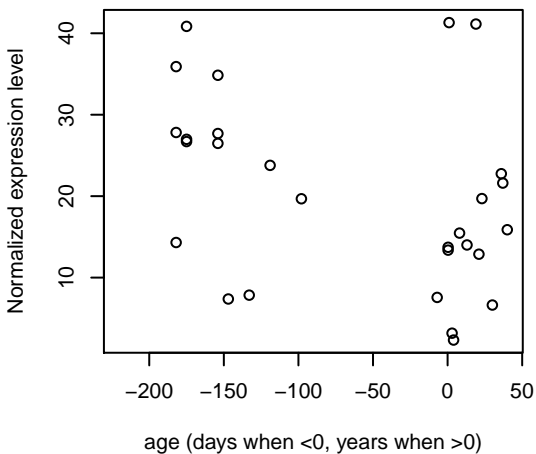

**OPA1\_193360553\_193360634**  
(P=0.4936, Diff = 2.75)  
striatum

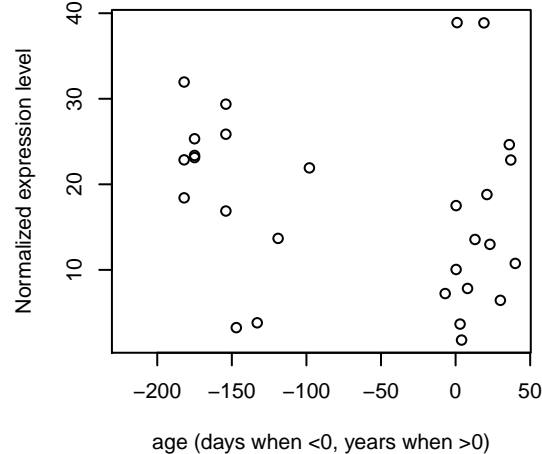

**OPA1\_193360763\_193360838**  
(P=0.7862, Diff = 1.05)  
striatum

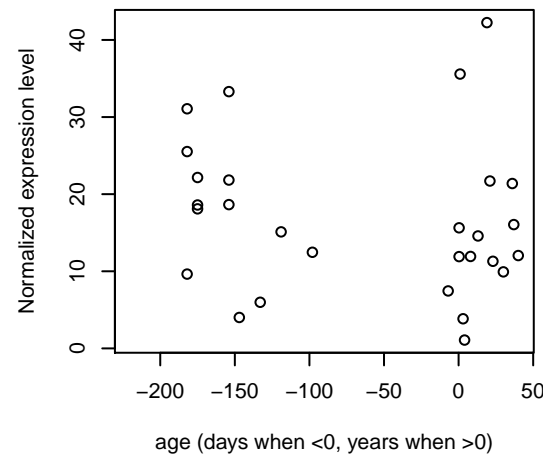

**OPA1\_193361161\_193361233**  
(P=0.6133, Diff = 2.06)  
striatum

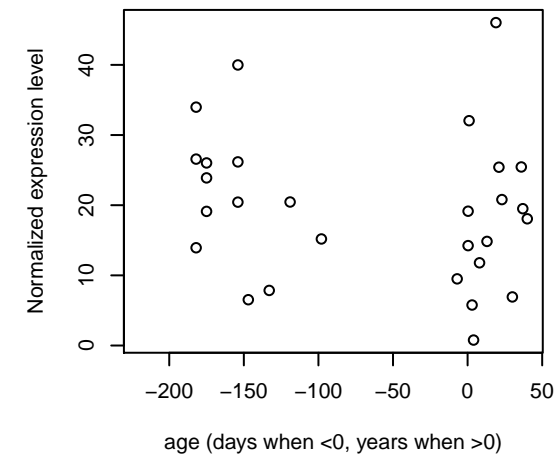

**OPA1\_193361316\_193361416**  
(P=0.8585, Diff = 0.75)  
striatum

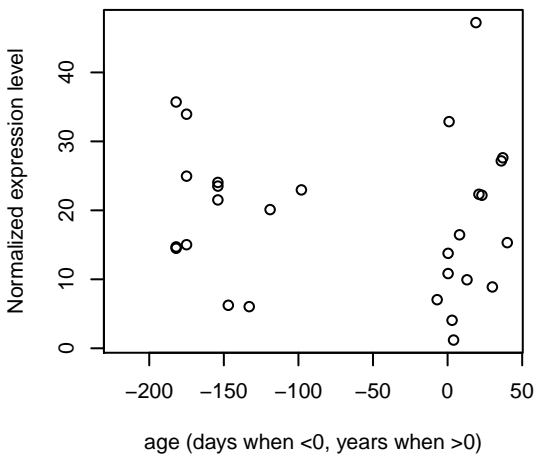

**OPA1\_193361763\_193361940**  
(P=0.6177, Diff = 1.58)  
striatum

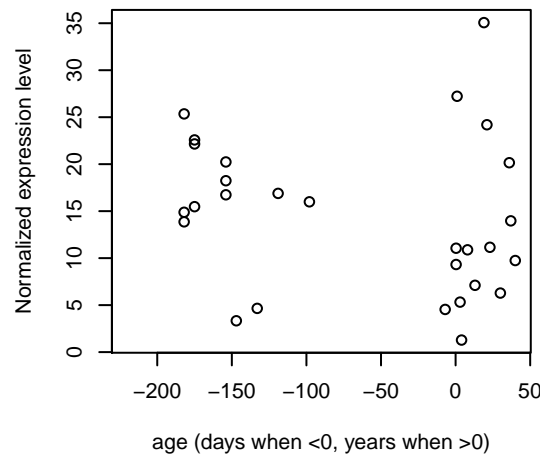

**OPA1\_193363341\_193363414**  
(P=0.9442, Diff = -0.27)  
striatum

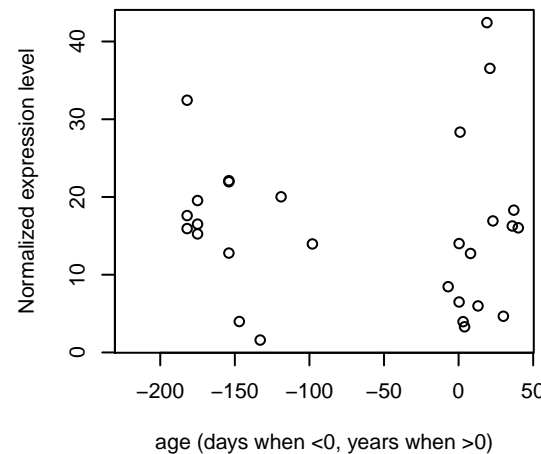

**OPA1\_193363516\_193363589**  
(P=0.9761, Diff = -0.12)  
striatum

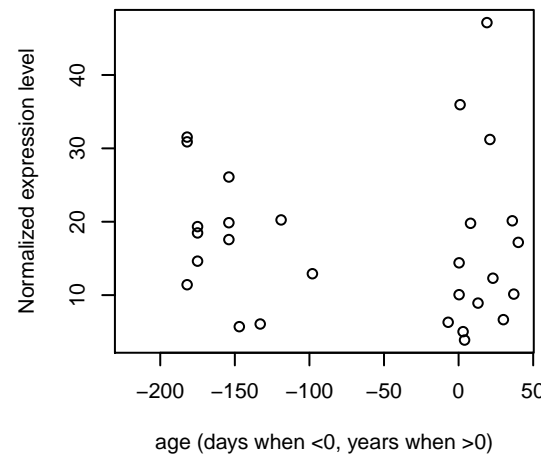

**OPA1\_193364853\_193364969**  
(P=0.6242, Diff = 1.97)  
striatum

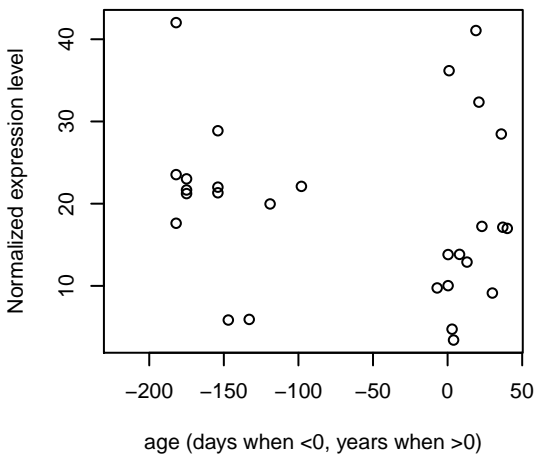

**OPA1\_193365858\_193366249**  
(P=0.7561, Diff = 0.24)  
striatum

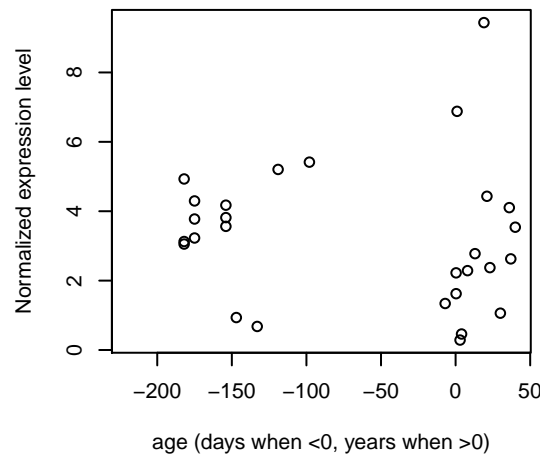

**OPA1\_193366554\_193366660**  
(P=0.6813, Diff = 1.35)  
striatum

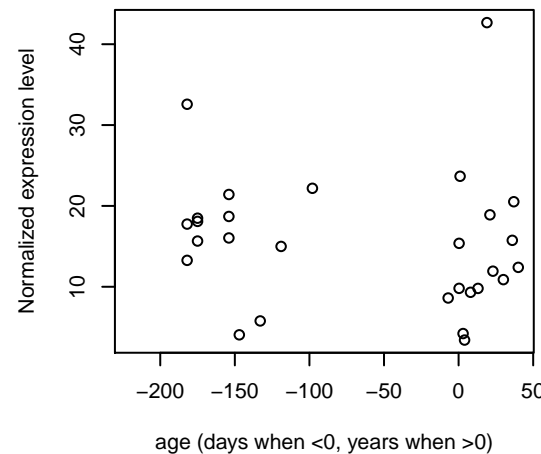

**OPA1\_193372650\_193372816**  
(P=0.6128, Diff = 2.75)  
striatum

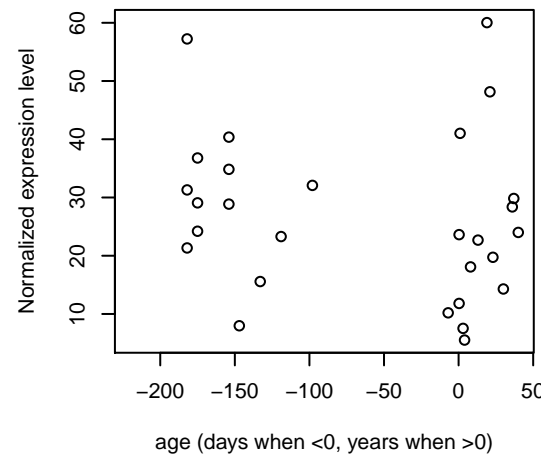

**OPA1\_193374868\_193375021**  
(P=0.5577, Diff = 2.79)  
striatum

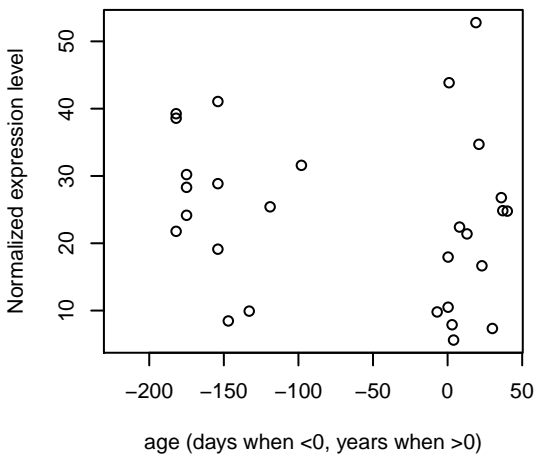

**OPA1\_193376675\_193376784**  
(P=0.7854, Diff = 1.23)  
striatum

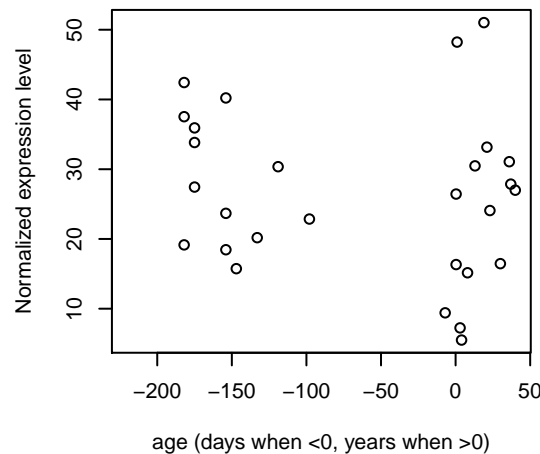

**OPA1\_193377270\_193377350**  
(P=0.8599, Diff = -0.85)  
striatum

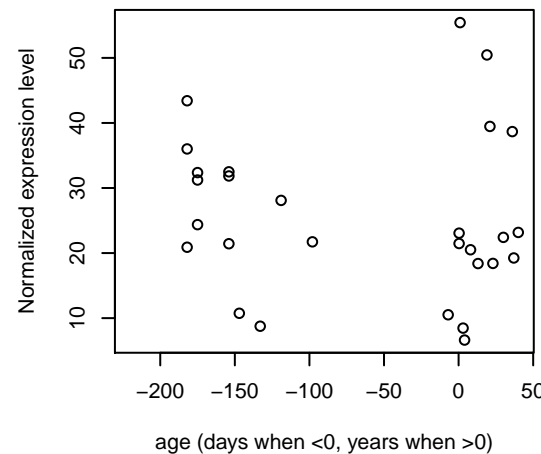

**OPA1\_193380610\_193380751**  
(P=0.3832, Diff = 5.85)  
striatum

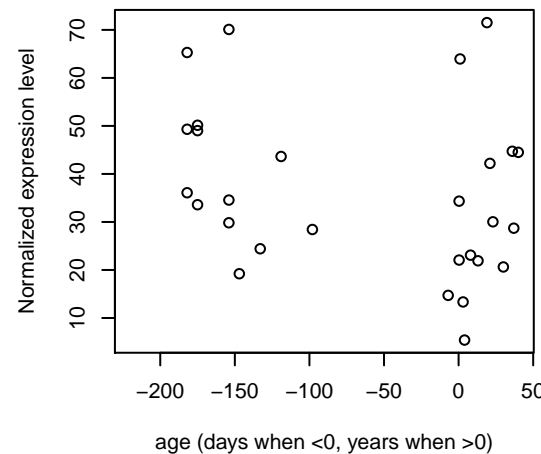

**OPA1\_193382668\_193382785**  
(P=0.9272, Diff = -0.44)  
striatum

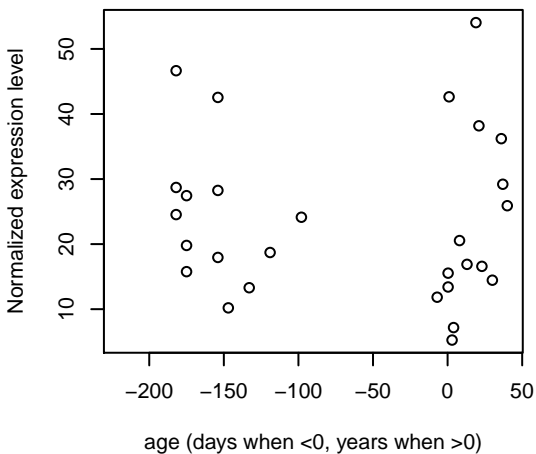

**OPA1\_193384084\_193384178**  
(P=0.7626, Diff = 1.57)  
striatum

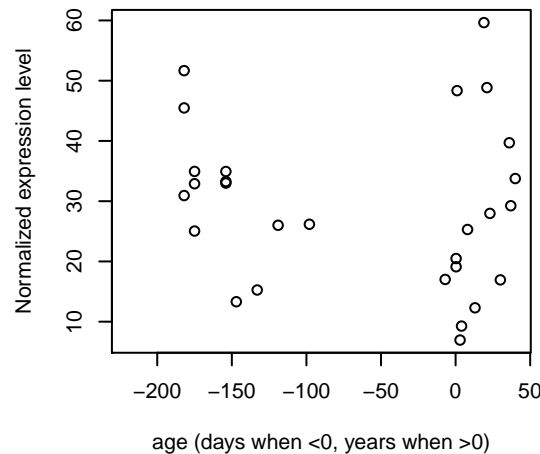

**OPA1\_193384958\_193385069**  
(P=0.891, Diff = -0.63)  
striatum

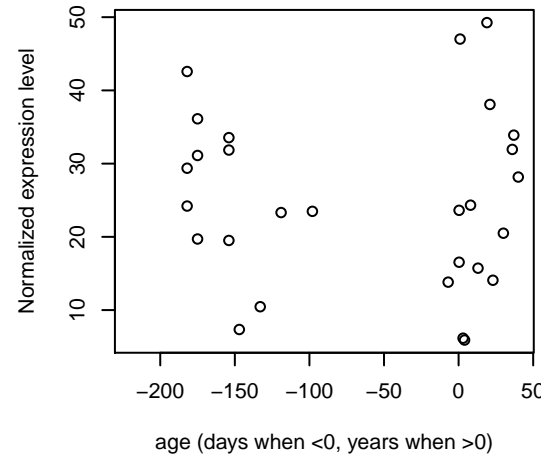

**OPA1\_193385159\_193385244**  
(P=NaN, Diff = 0)  
striatum

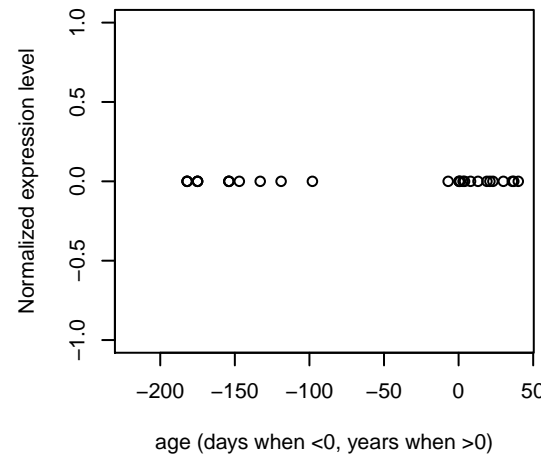

**OPA1\_193386103\_193386720**  
(P=0.0917, Diff = 0.1)  
striatum

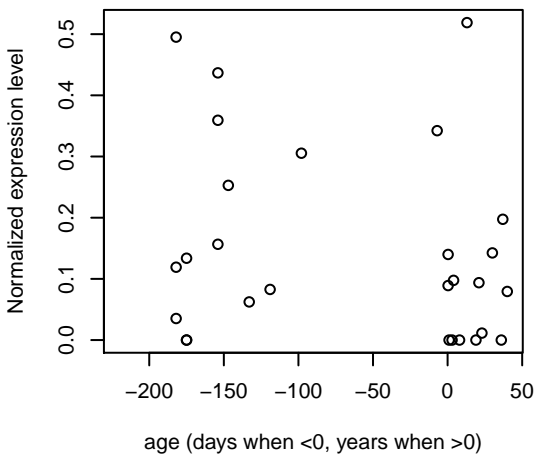

**OPA1\_193409182\_193409921**  
(P=0.9431, Diff = -0.03)  
striatum

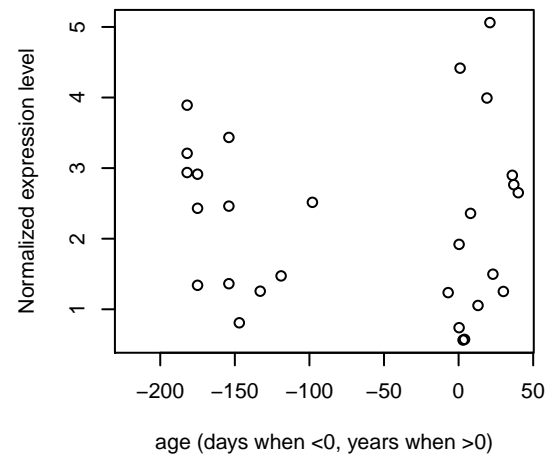

**OPA1\_193412394\_193415612**  
(P=0.249, Diff = -3.83)  
striatum

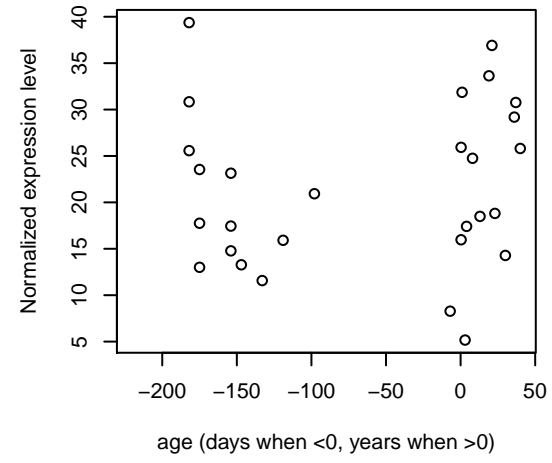

**ZMAT4\_40388108\_40389757**  
(P=0, Diff = -6.77)  
striatum

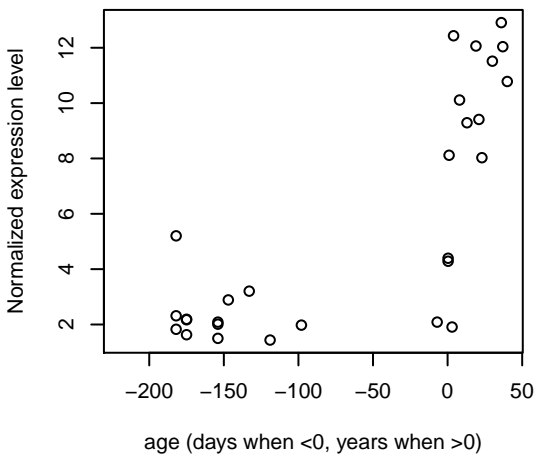

**ZMAT4\_40438683\_40438780**  
(P=7e-04, Diff = -5.14)  
striatum

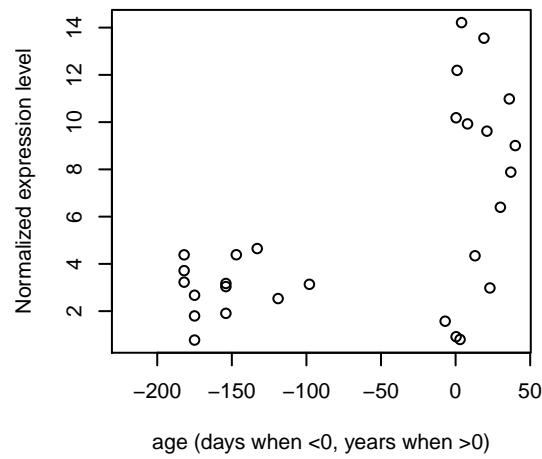

**ZMAT4\_40531882\_40532450**  
(P=0.0024, Diff = -1.19)  
striatum

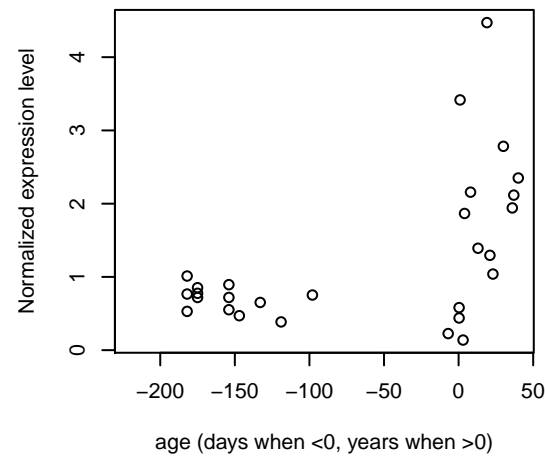

**ZMAT4\_40554514\_40554920**  
(P=0.0014, Diff = -1.42)  
striatum

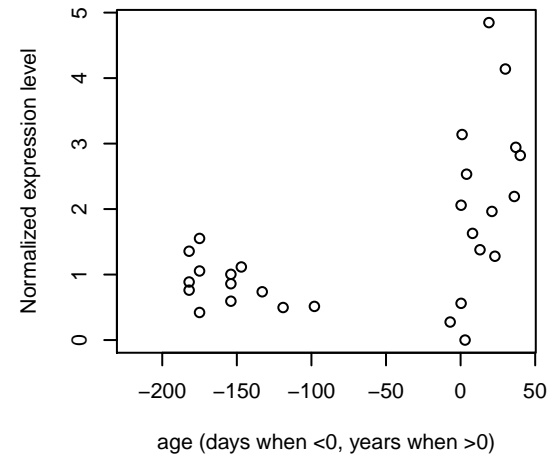

**ZMAT4\_40625159\_40625249**  
(P=0.0102, Diff = -3.19)  
striatum

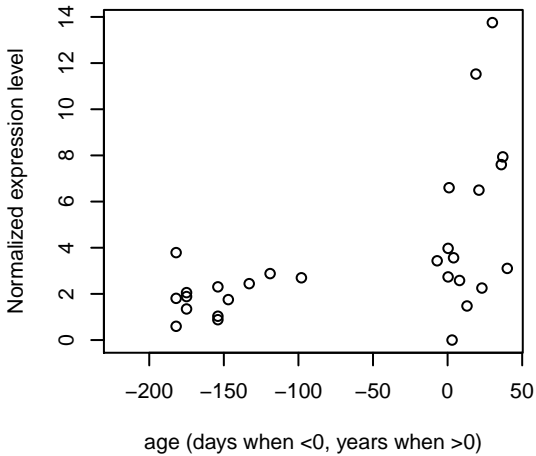

**ZMAT4\_40644207\_40644301**  
(P=0.8813, Diff = 0.01)  
striatum

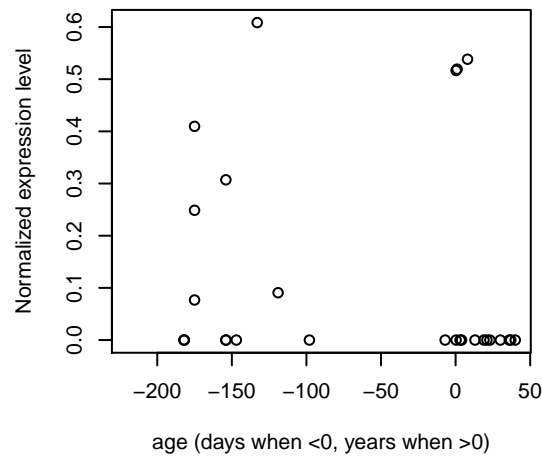

**ZMAT4\_40666027\_40666090**  
(P=0.3053, Diff = 0.12)  
striatum

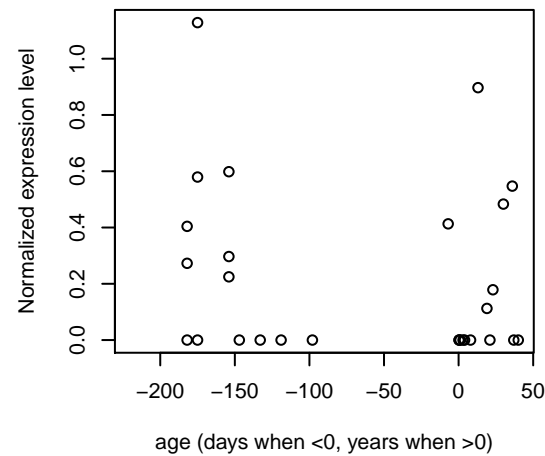

**ZMAT4\_40683093\_40683199**  
(P=0.001, Diff = -3.5)  
striatum

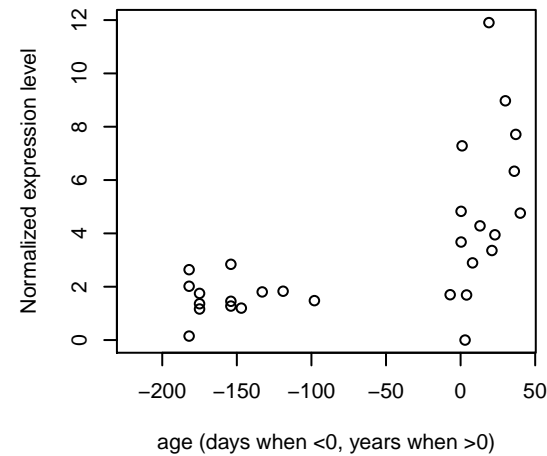

**ZMAT4\_40742047\_40742463**  
(P=0.0111, Diff = -0.31)  
striatum

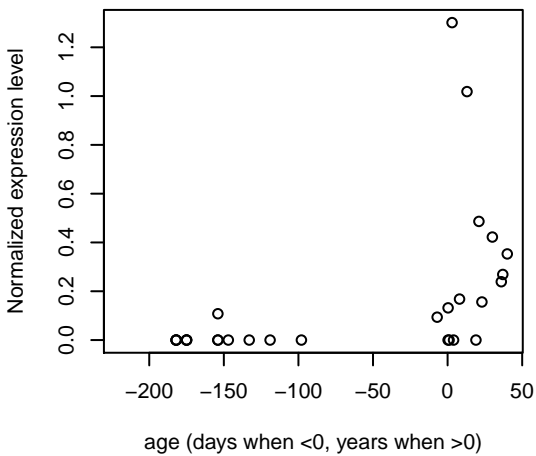

**ZMAT4\_40746013\_40746064**  
(P=0.3356, Diff = -0.01)  
striatum

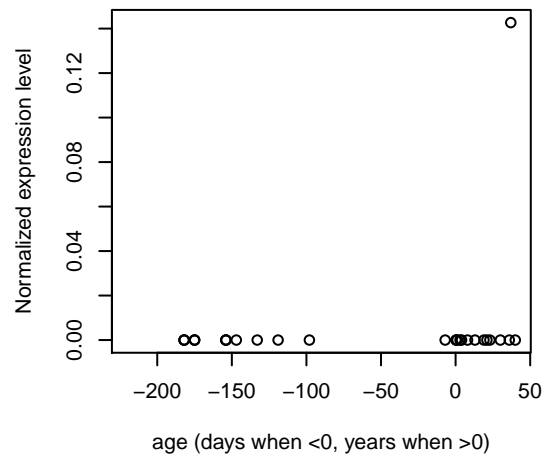

**ZMAT4\_40755201\_40755352**  
(P=0.1024, Diff = -0.43)  
striatum

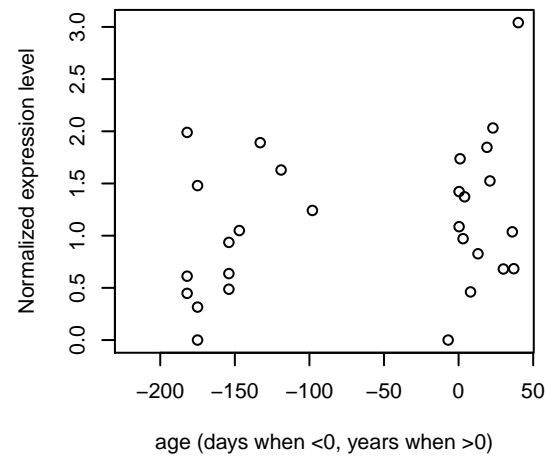

**CNDP1\_72201674\_72201926**  
(P=0, Diff = -20.31)  
striatum

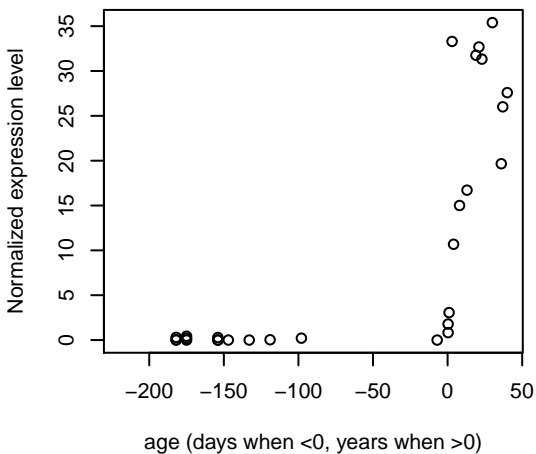

**CNDP1\_72223572\_72223701**  
(P=4e-04, Diff = -47.02)  
striatum

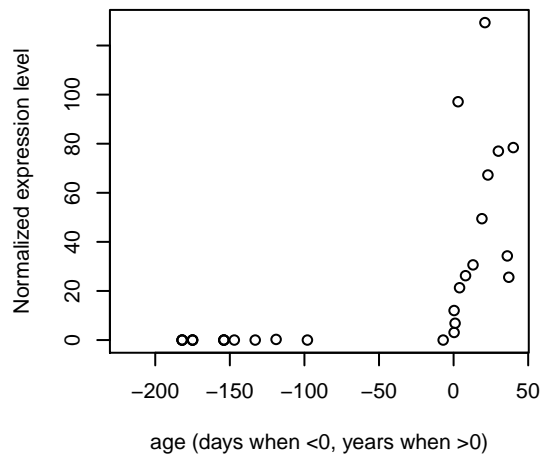

**CNDP1\_72226557\_72226707**  
(P=7e-04, Diff = -50.39)  
striatum

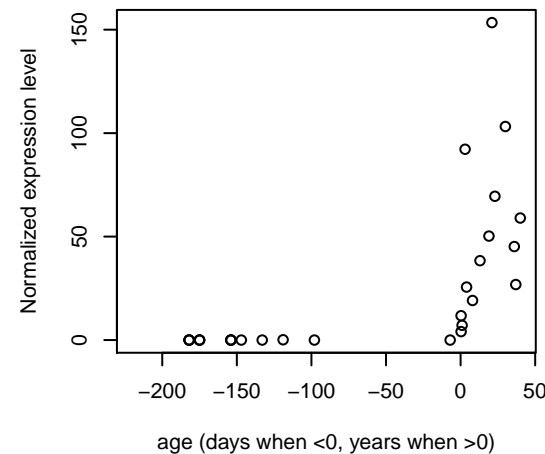

**CNDP1\_72228090\_72228253**  
(P=7e-04, Diff = -69.46)  
striatum

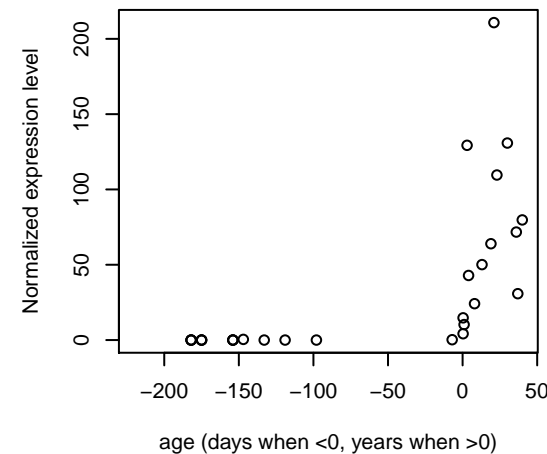

**CNDP1\_72229281\_72229370**  
(P=0, Diff = -100.59)  
striatum

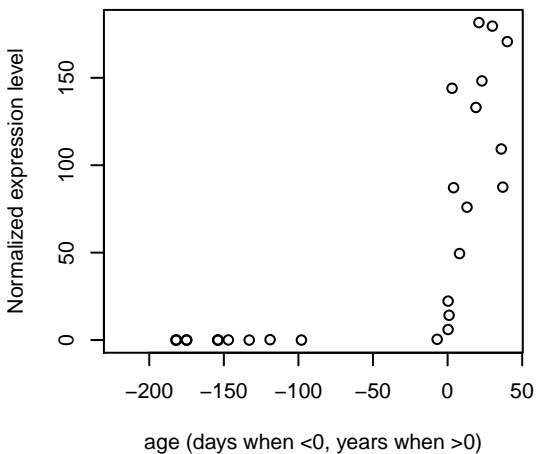

**CNDP1\_72234467\_72234668**  
(P=0, Diff = -106.29)  
striatum

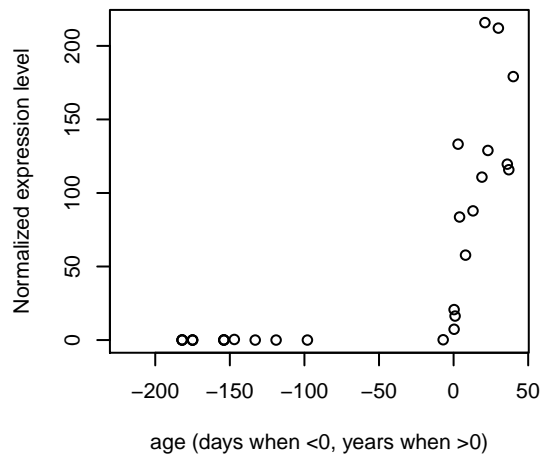

**CNDP1\_72238420\_72238505**  
(P=0, Diff = -114.54)  
striatum

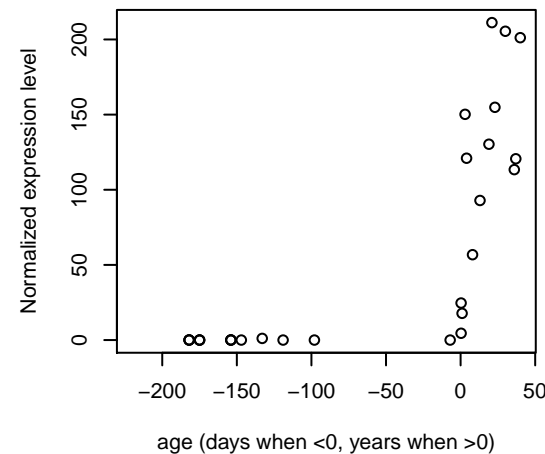

**CNDP1\_72244103\_72244264**  
(P=1e-04, Diff = -89.63)  
striatum

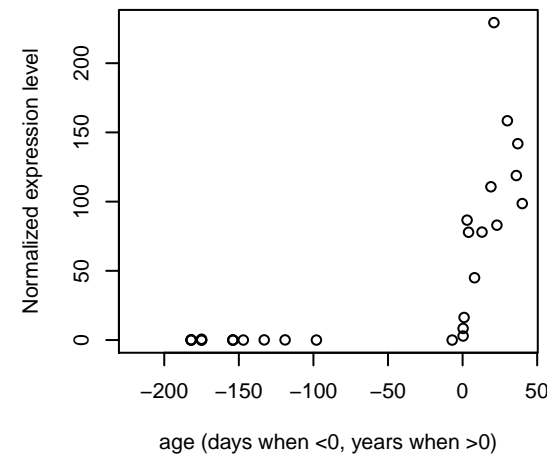

**CNDP1\_72245397\_72245562**  
(P=1e-04, Diff = -111.67)  
striatum

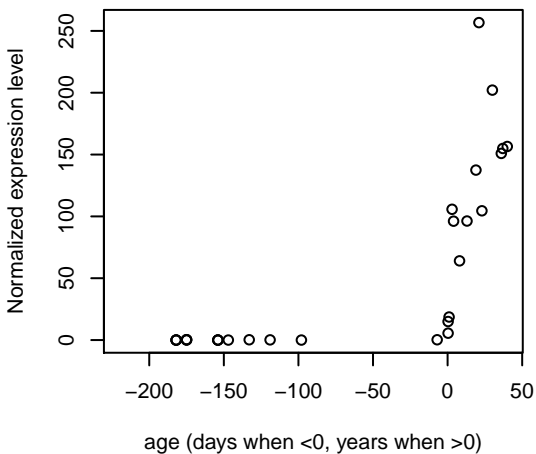

**CNDP1\_72247365\_72247507**  
(P=0, Diff = -142.7)  
striatum

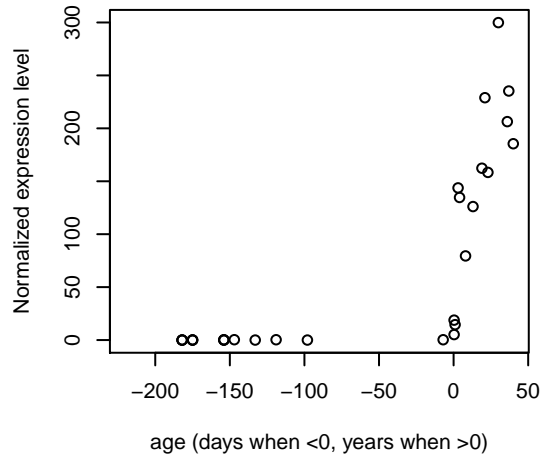

**CNDP1\_72250796\_72250944**  
(P=1e-04, Diff = -137.17)  
striatum

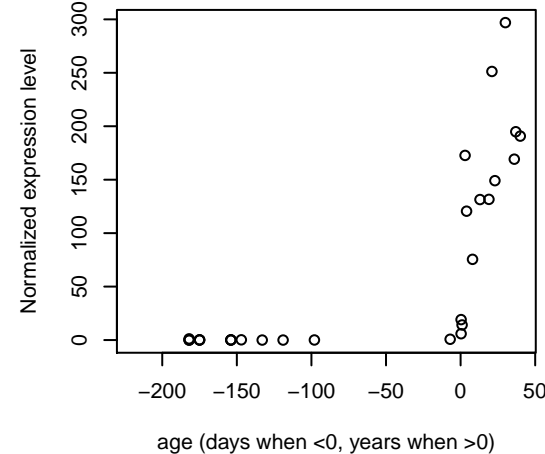

**CNDP1\_72251731\_72252261**  
(P=1e-04, Diff = -85.42)  
striatum

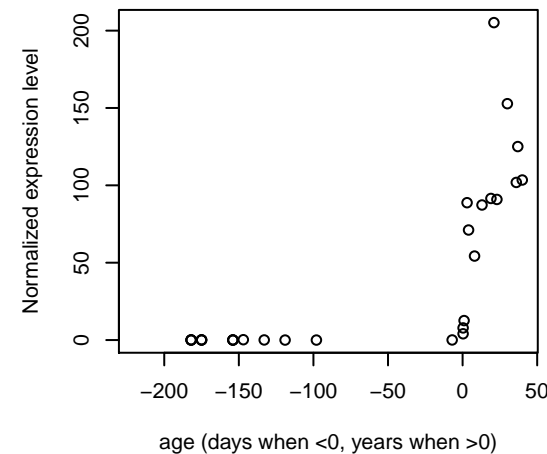

**TOX3\_52471917\_52473880**  
(P=0.0038, Diff = 12.1)  
striatum

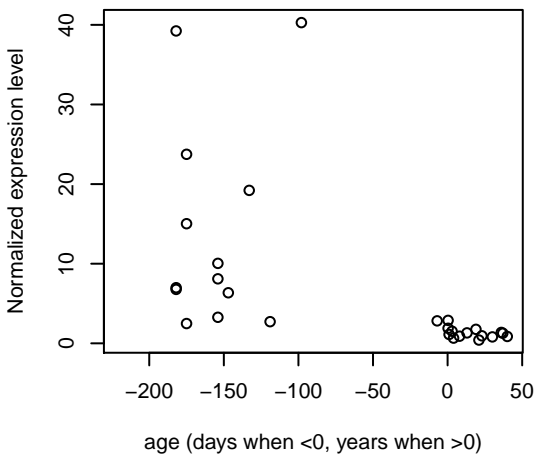

**TOX3\_52478187\_52478268**  
(P=0.0014, Diff = 10.01)  
striatum

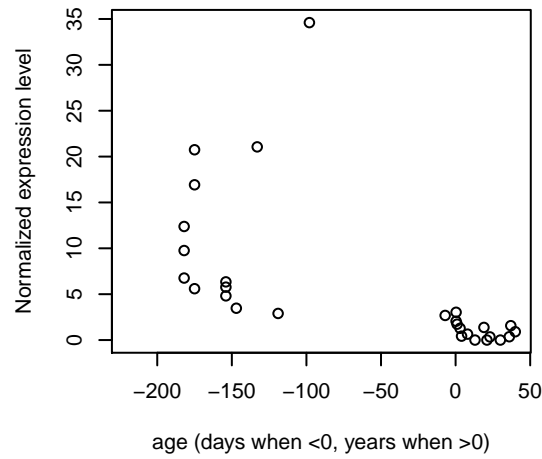

**TOX3\_52479905\_52480133**  
(P=0.0017, Diff = 8.78)  
striatum

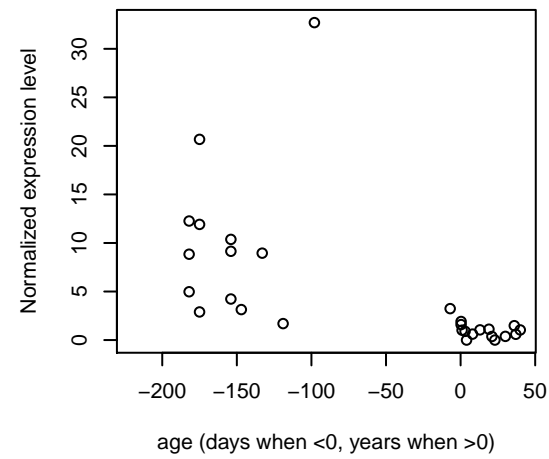

**TOX3\_52484188\_52484458**  
(P=0.0053, Diff = 11.17)  
striatum

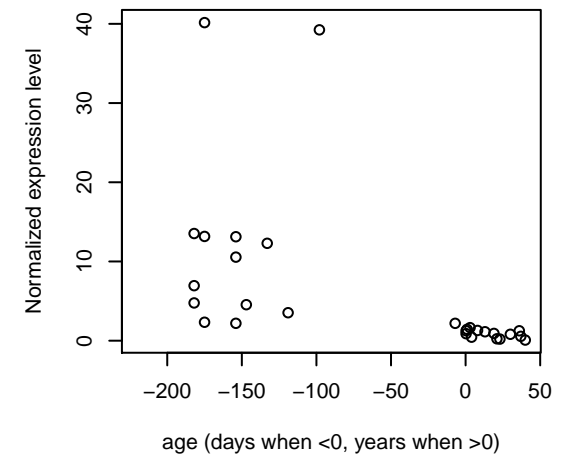

**TOX3\_52497845\_52498100**  
(P=0.0065, Diff = 12.24)  
striatum

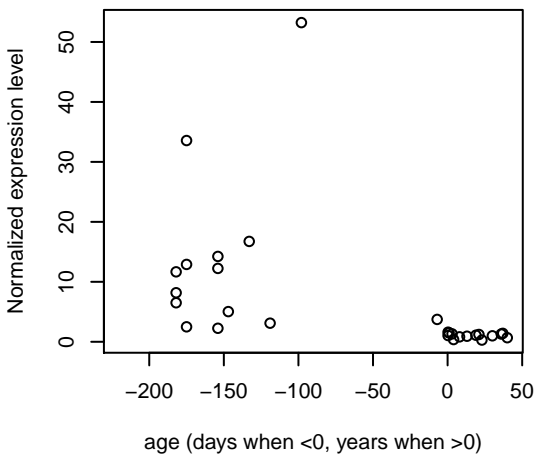

**TOX3\_52502420\_52502486**  
(P=0.003, Diff = 6.09)  
striatum

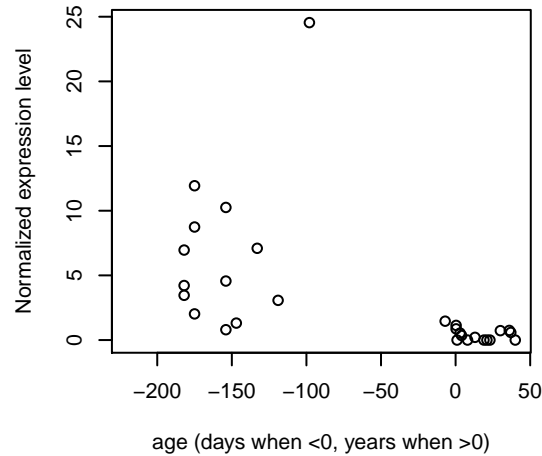

**TOX3\_52553317\_52553491**  
(P=0.0793, Diff = 0.12)  
striatum

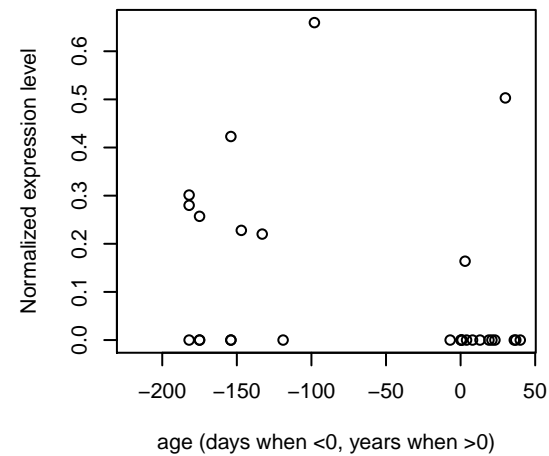

**TOX3\_52580548\_52580806**  
(P=5e-04, Diff = 2.26)  
striatum

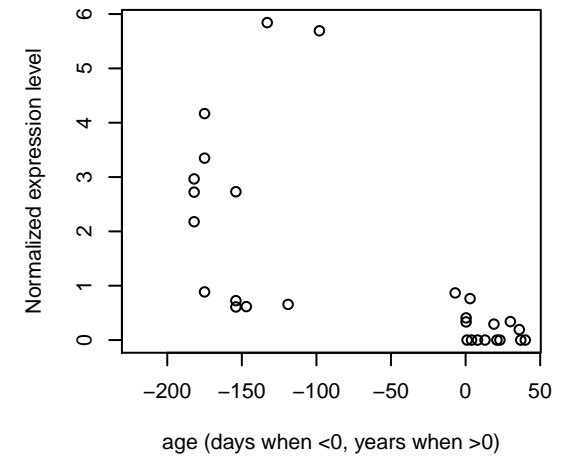

**TOX3\_52581625\_52581714**  
(P=0.112, Diff = 0.16)  
striatum

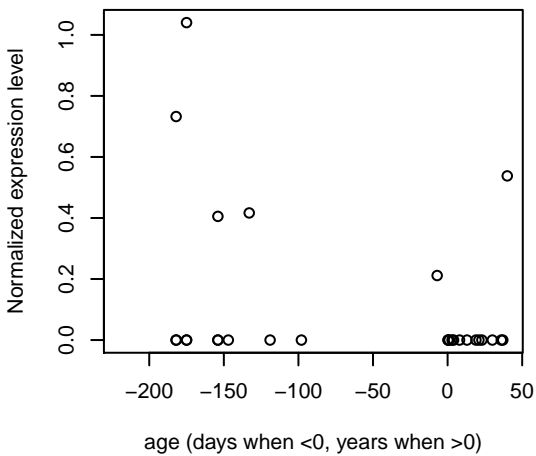

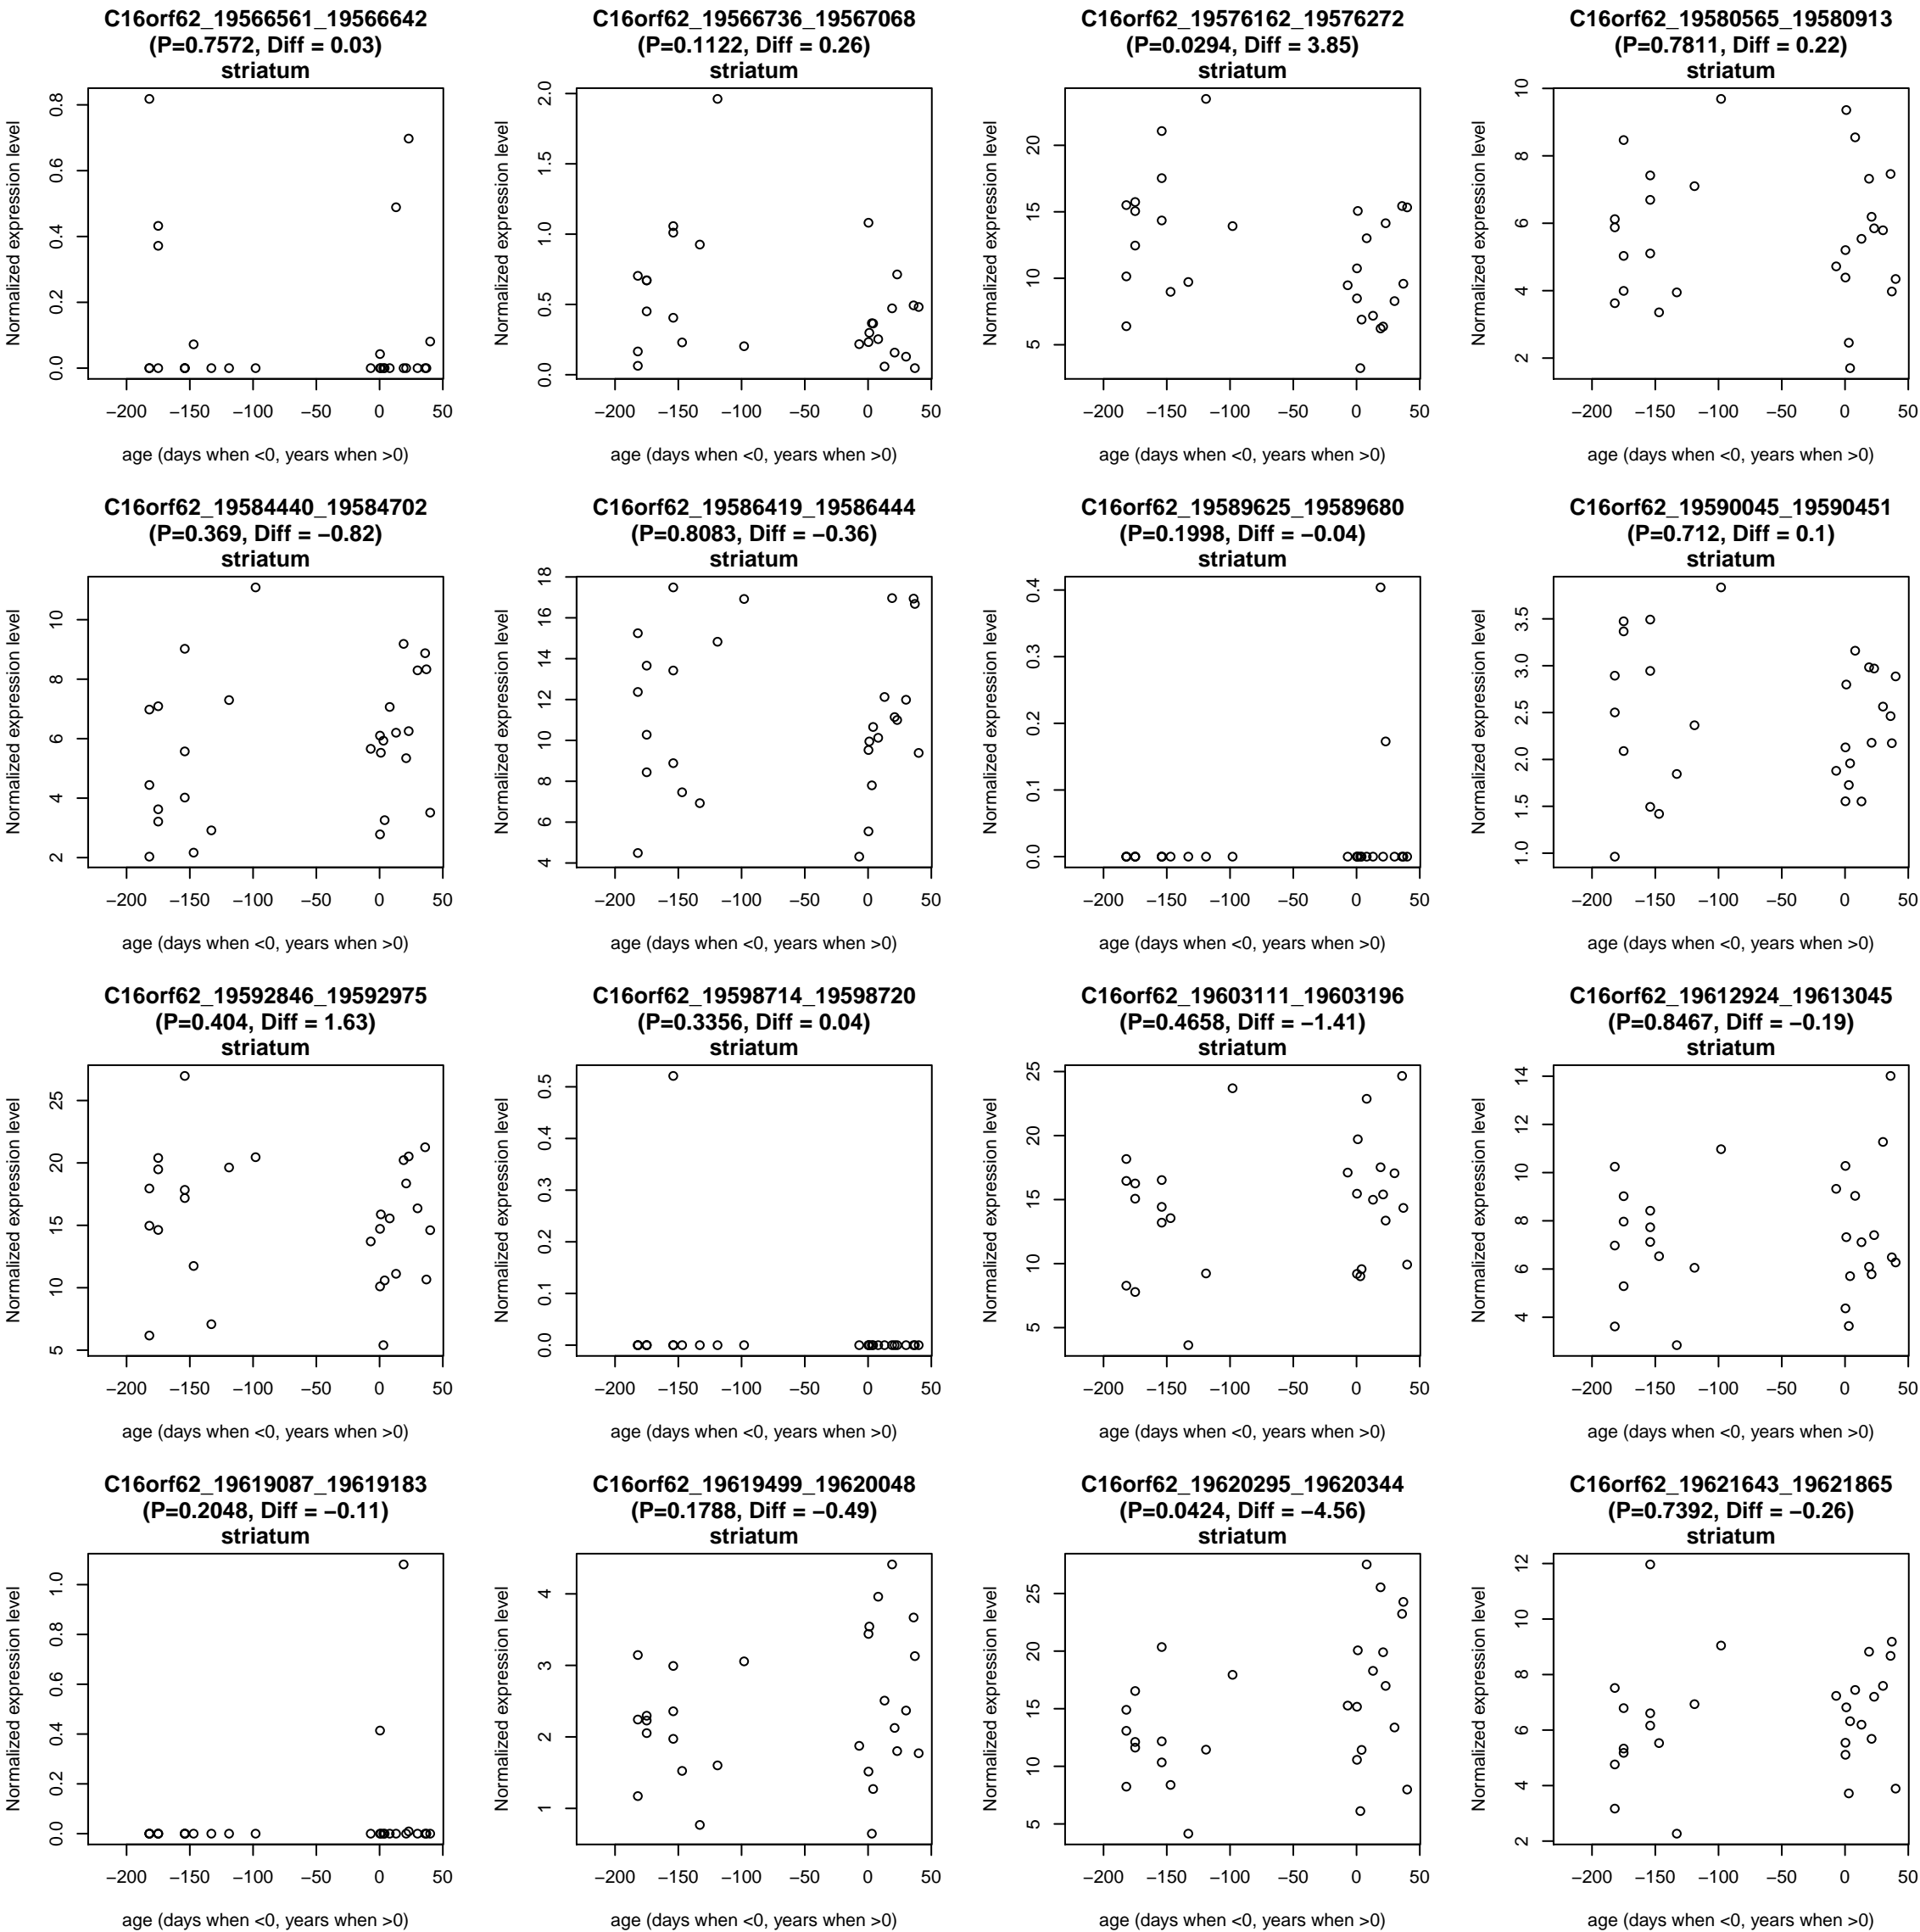



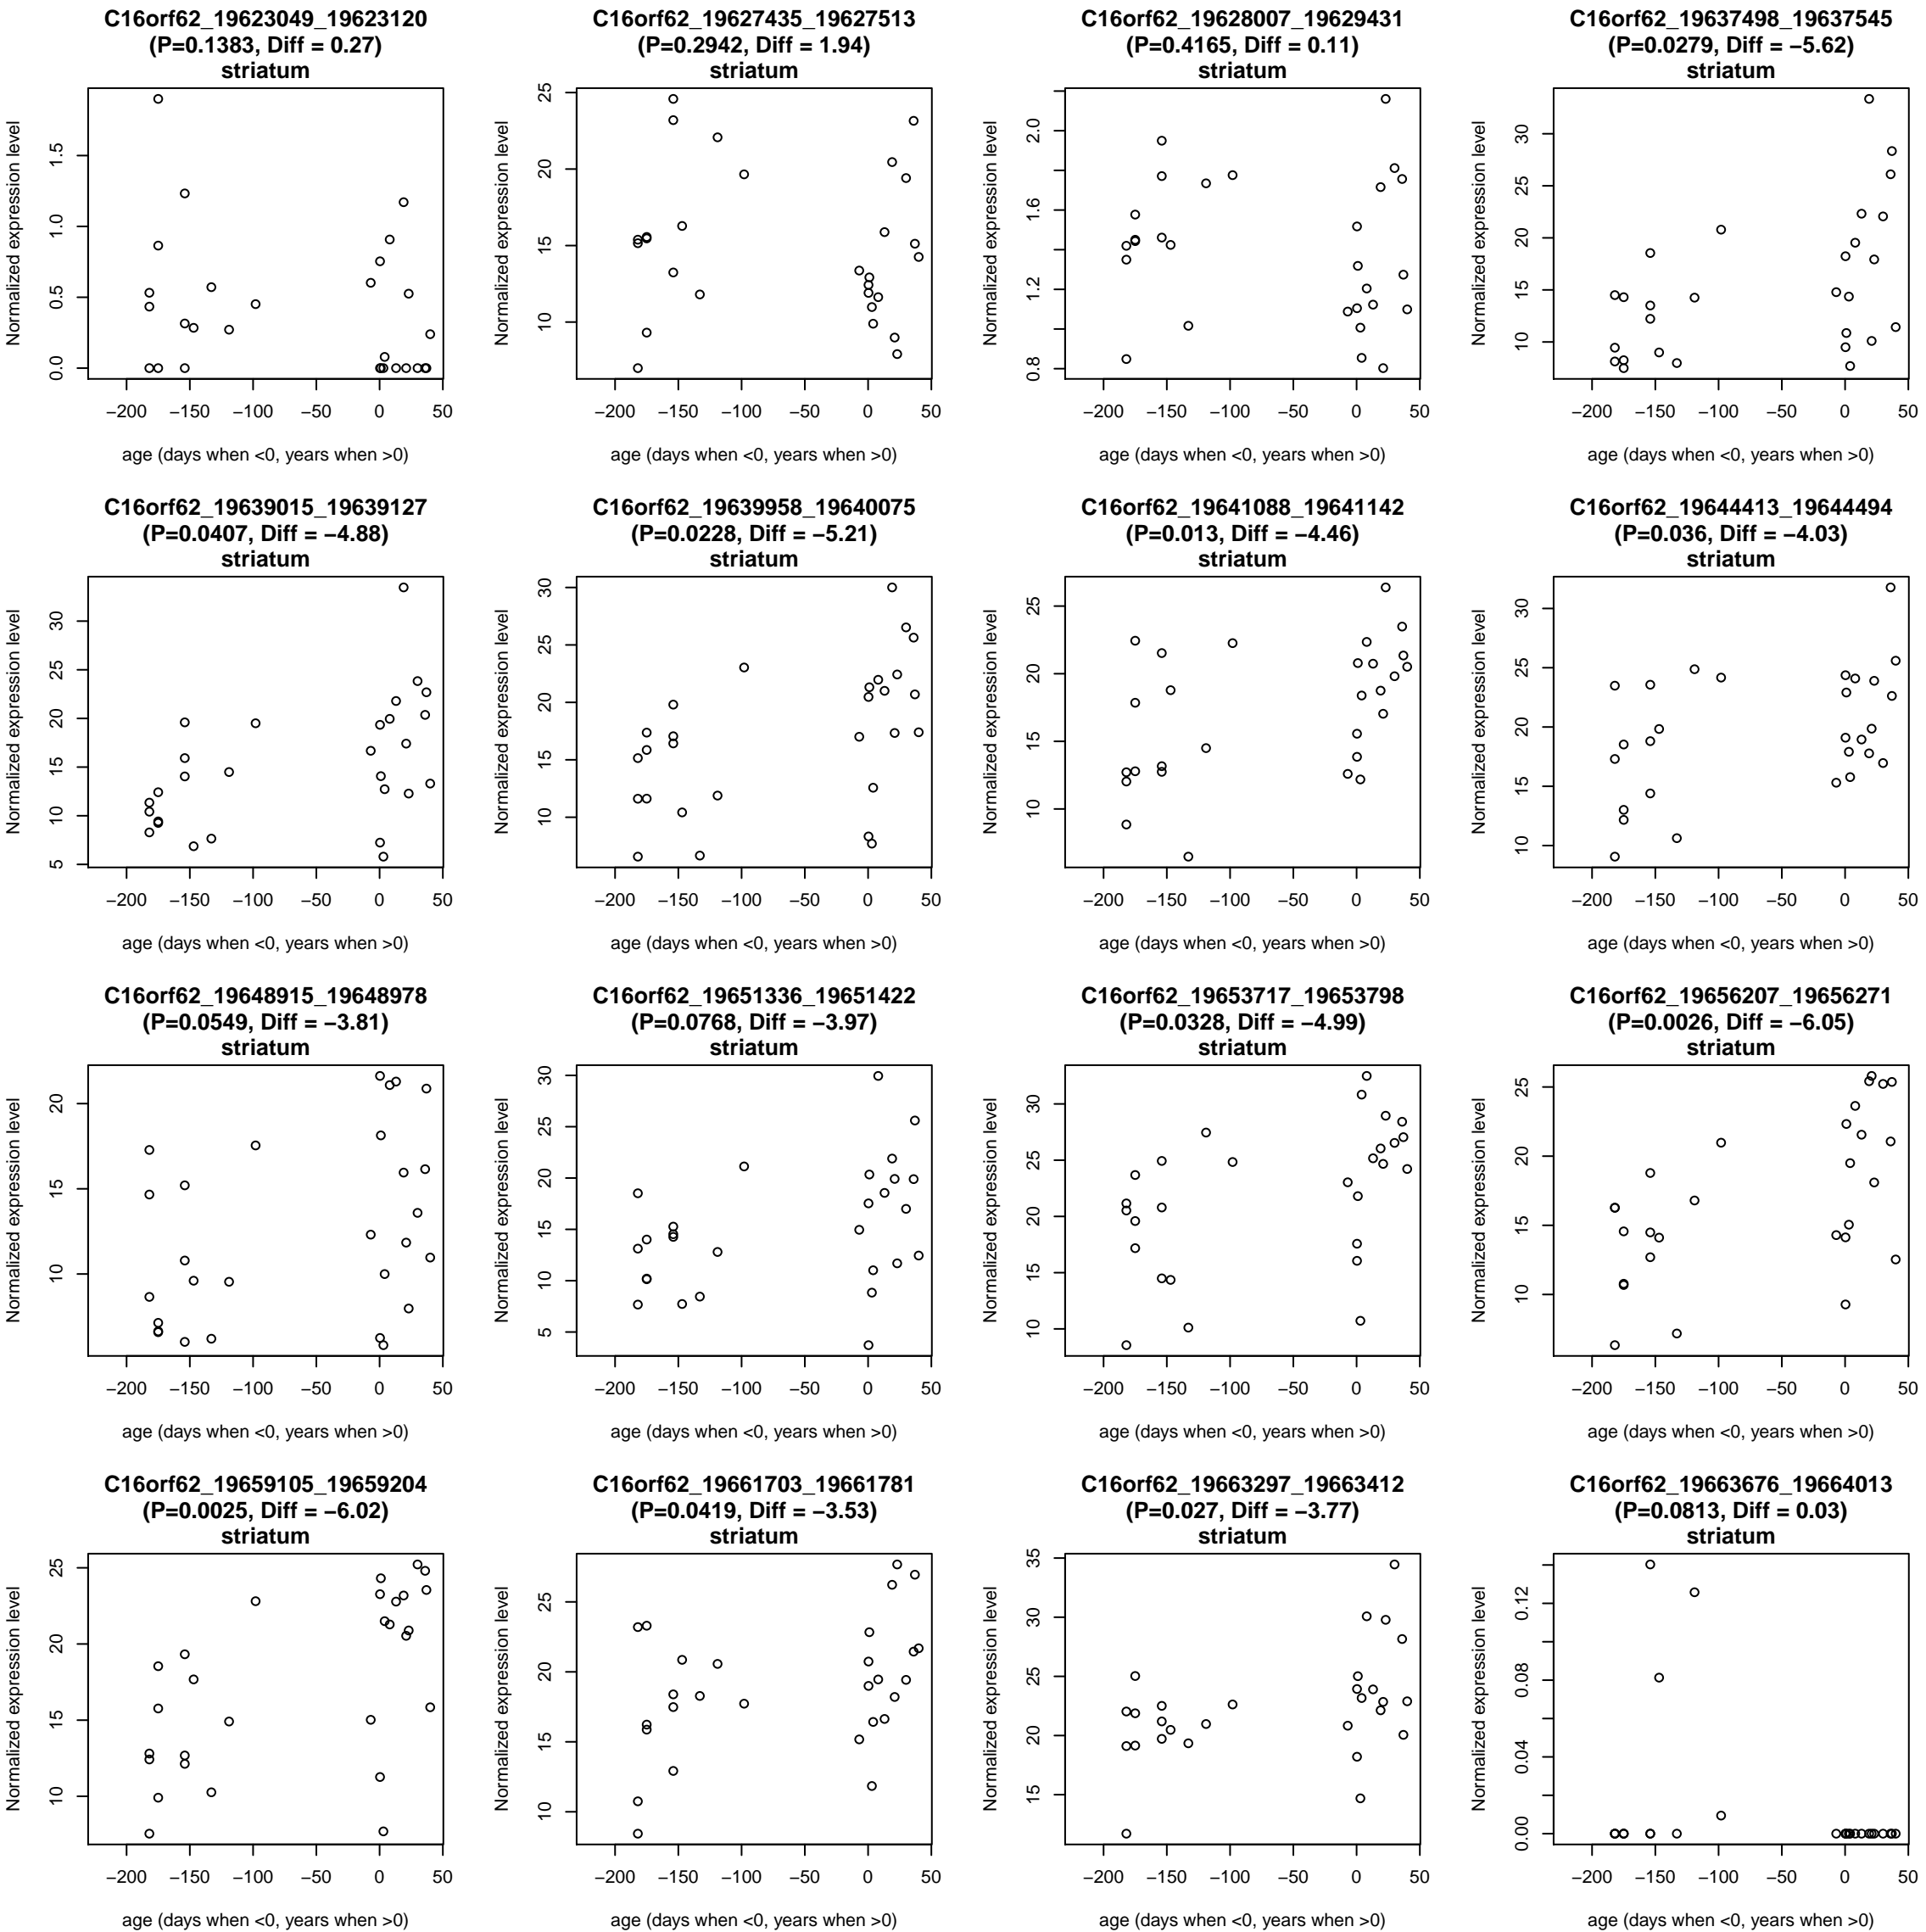

**C16orf62\_19680481\_19680621**  
(P=0.0011, Diff = -8.76)  
striatum

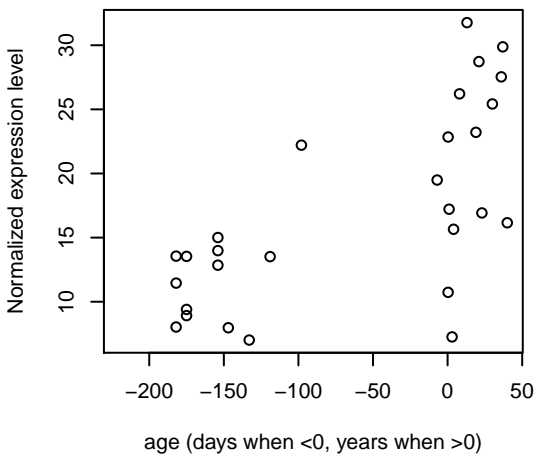

**C16orf62\_19693546\_19693712**  
(P=0.5929, Diff = -1.99)  
striatum

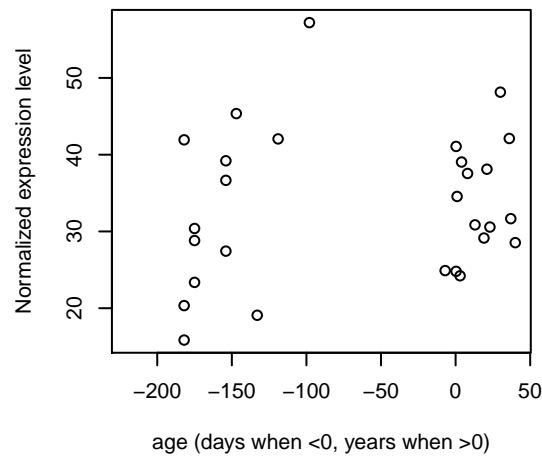

**C16orf62\_19702674\_19702793**  
(P=0.588, Diff = -2.21)  
striatum

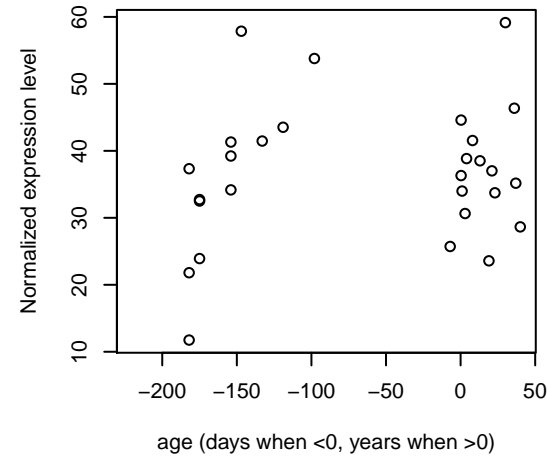

**C16orf62\_19710823\_19710970**  
(P=0.8376, Diff = -0.89)  
striatum

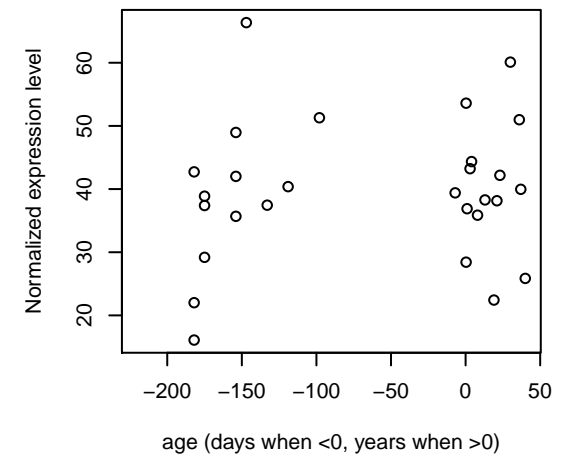

**C16orf62\_19711699\_19712448**  
(P=0.0808, Diff = -2.1)  
striatum

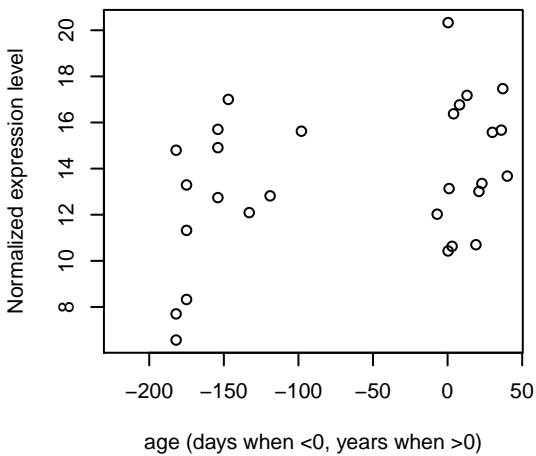

**C16orf62\_19716437\_19716880**  
(P=0.0027, Diff = 2.1)  
striatum

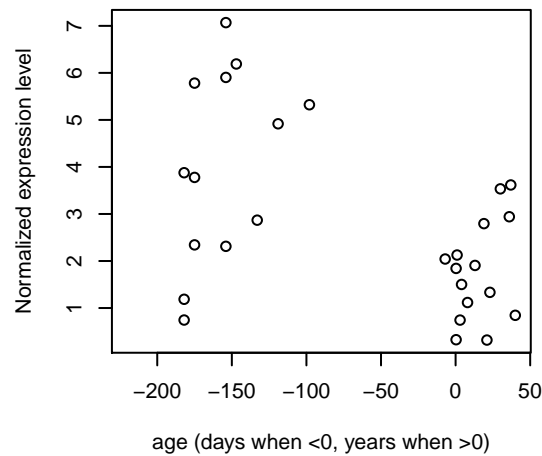

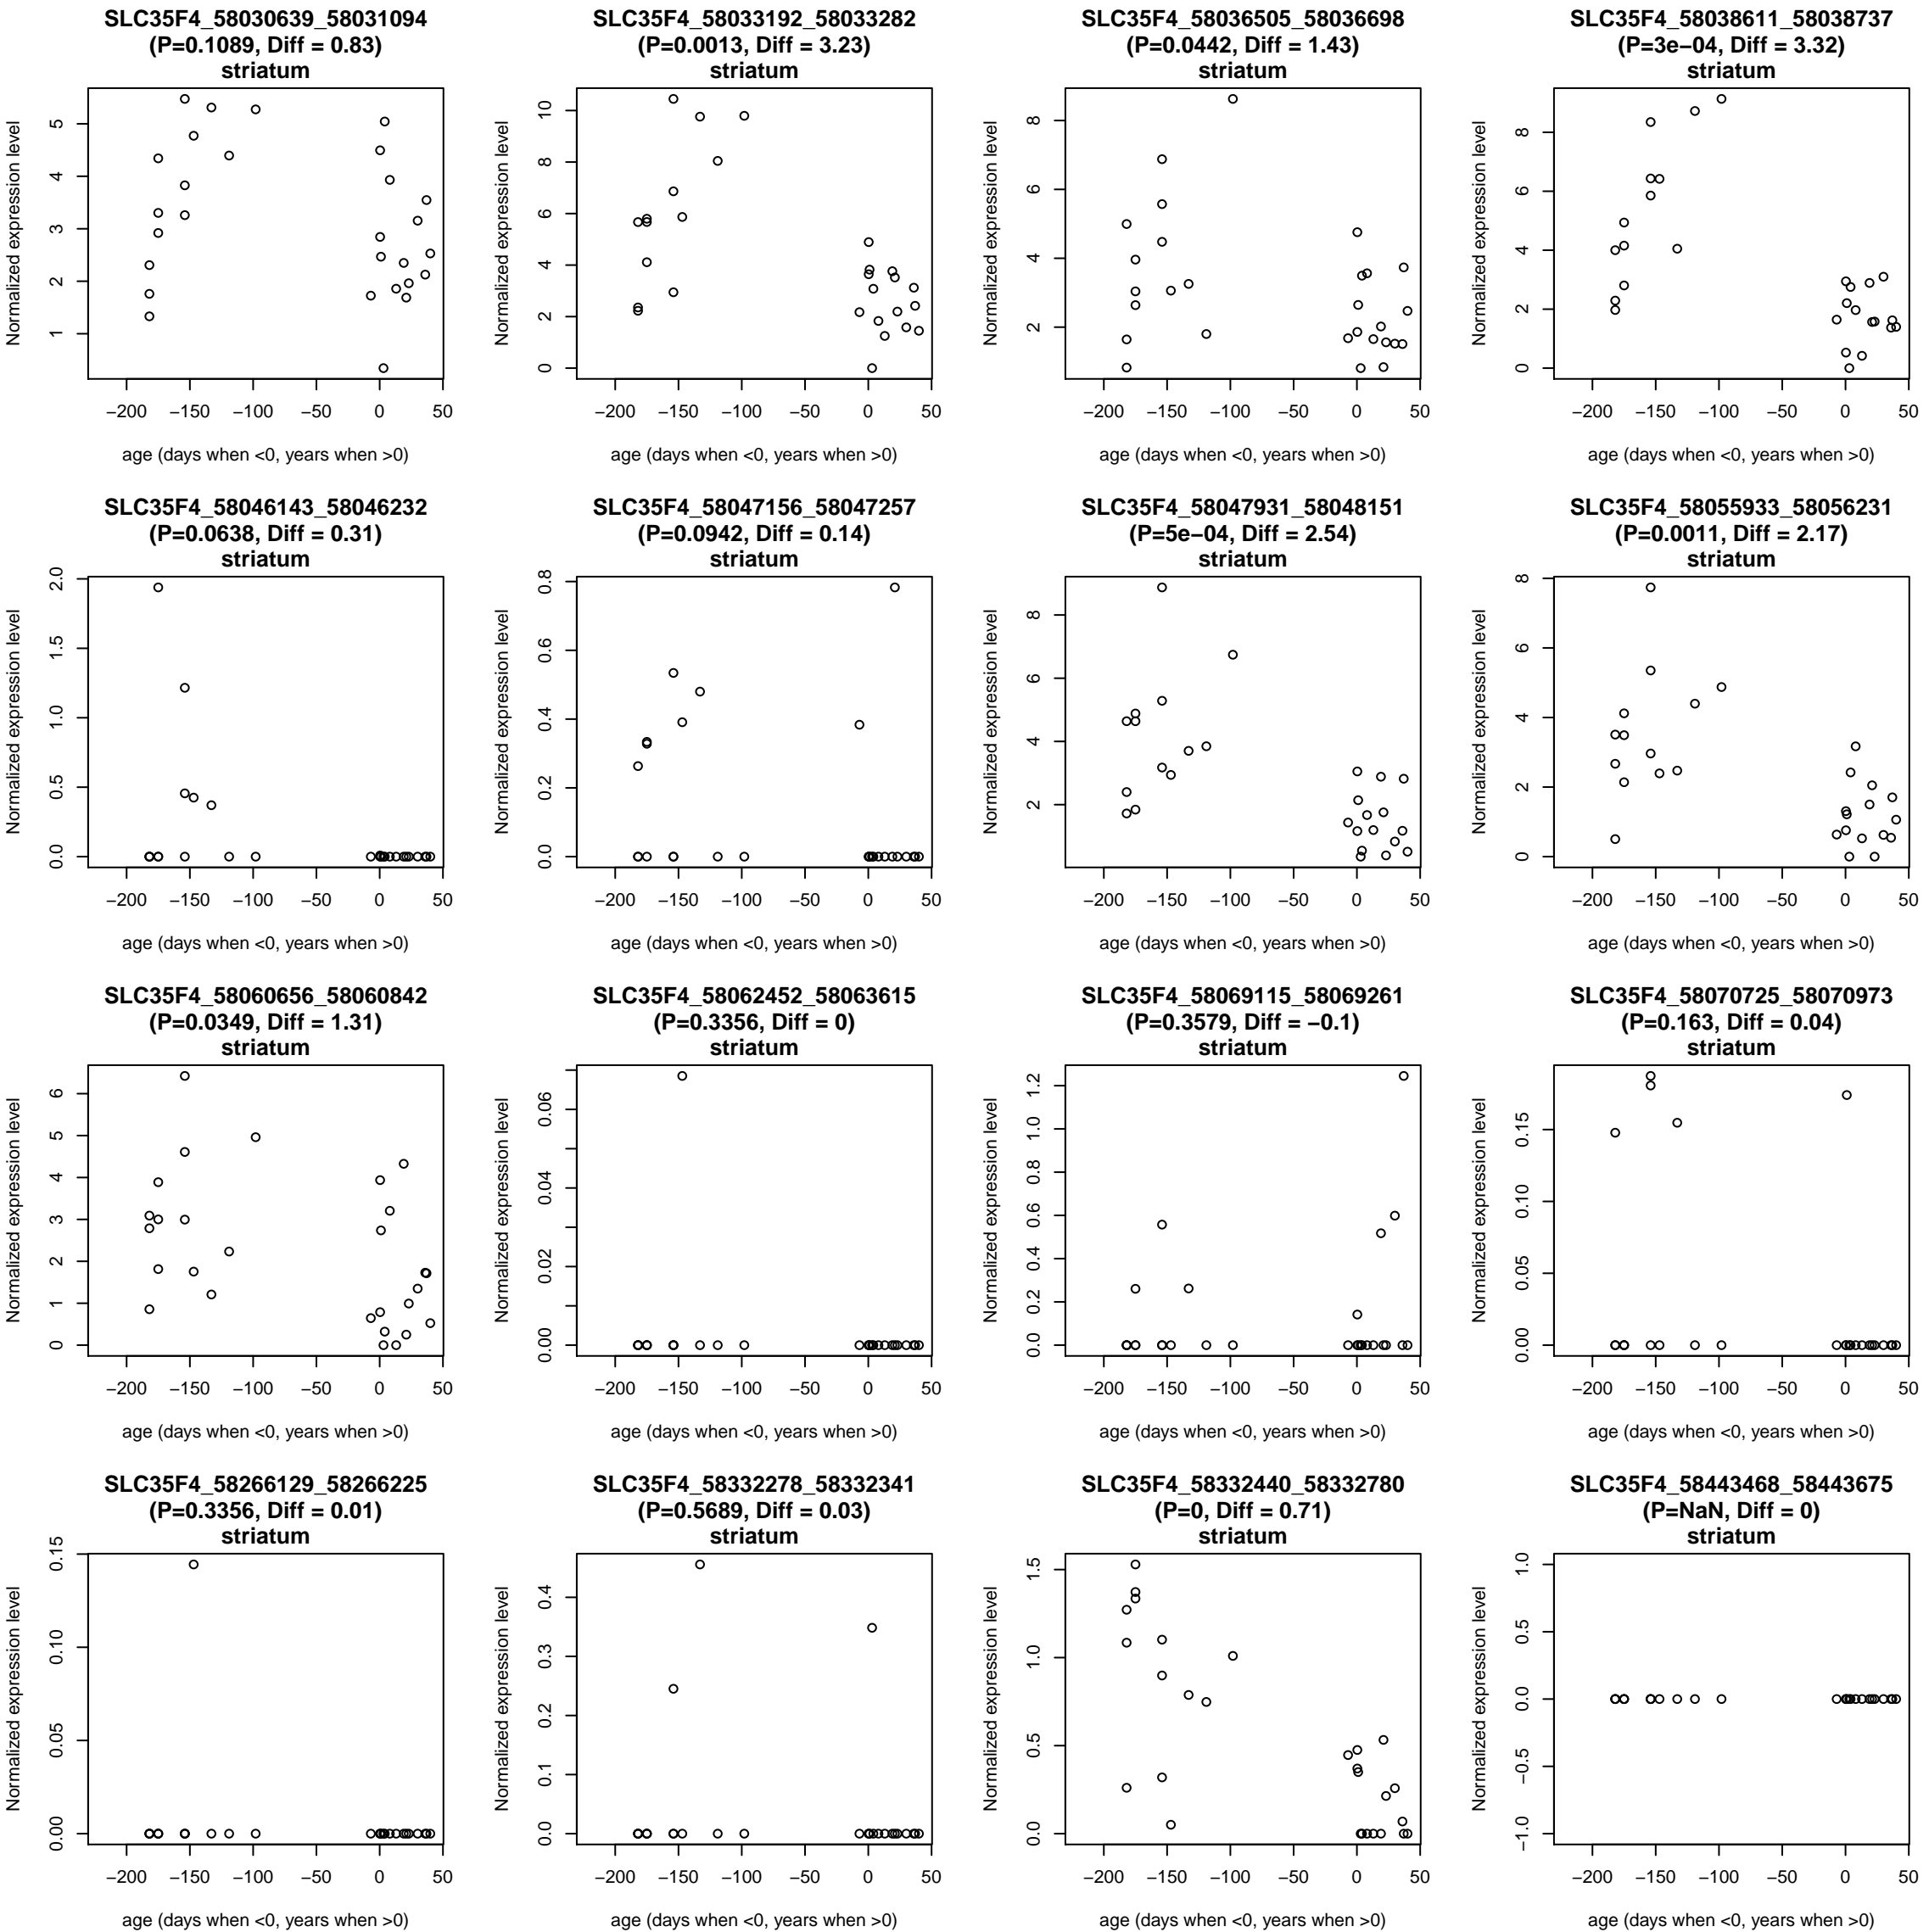

SLC35F4\_58448630\_58448912  
(P=0.3356, Diff = 0.01)  
striatum

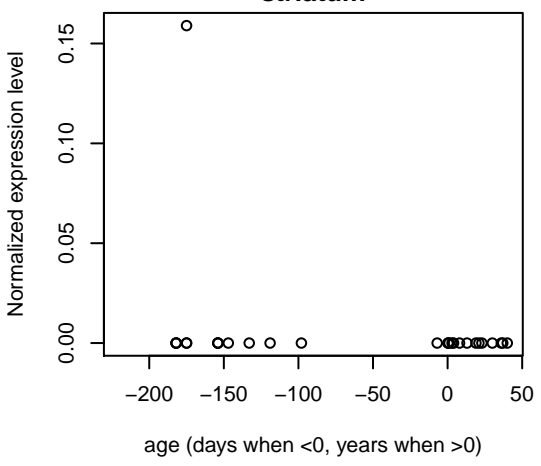

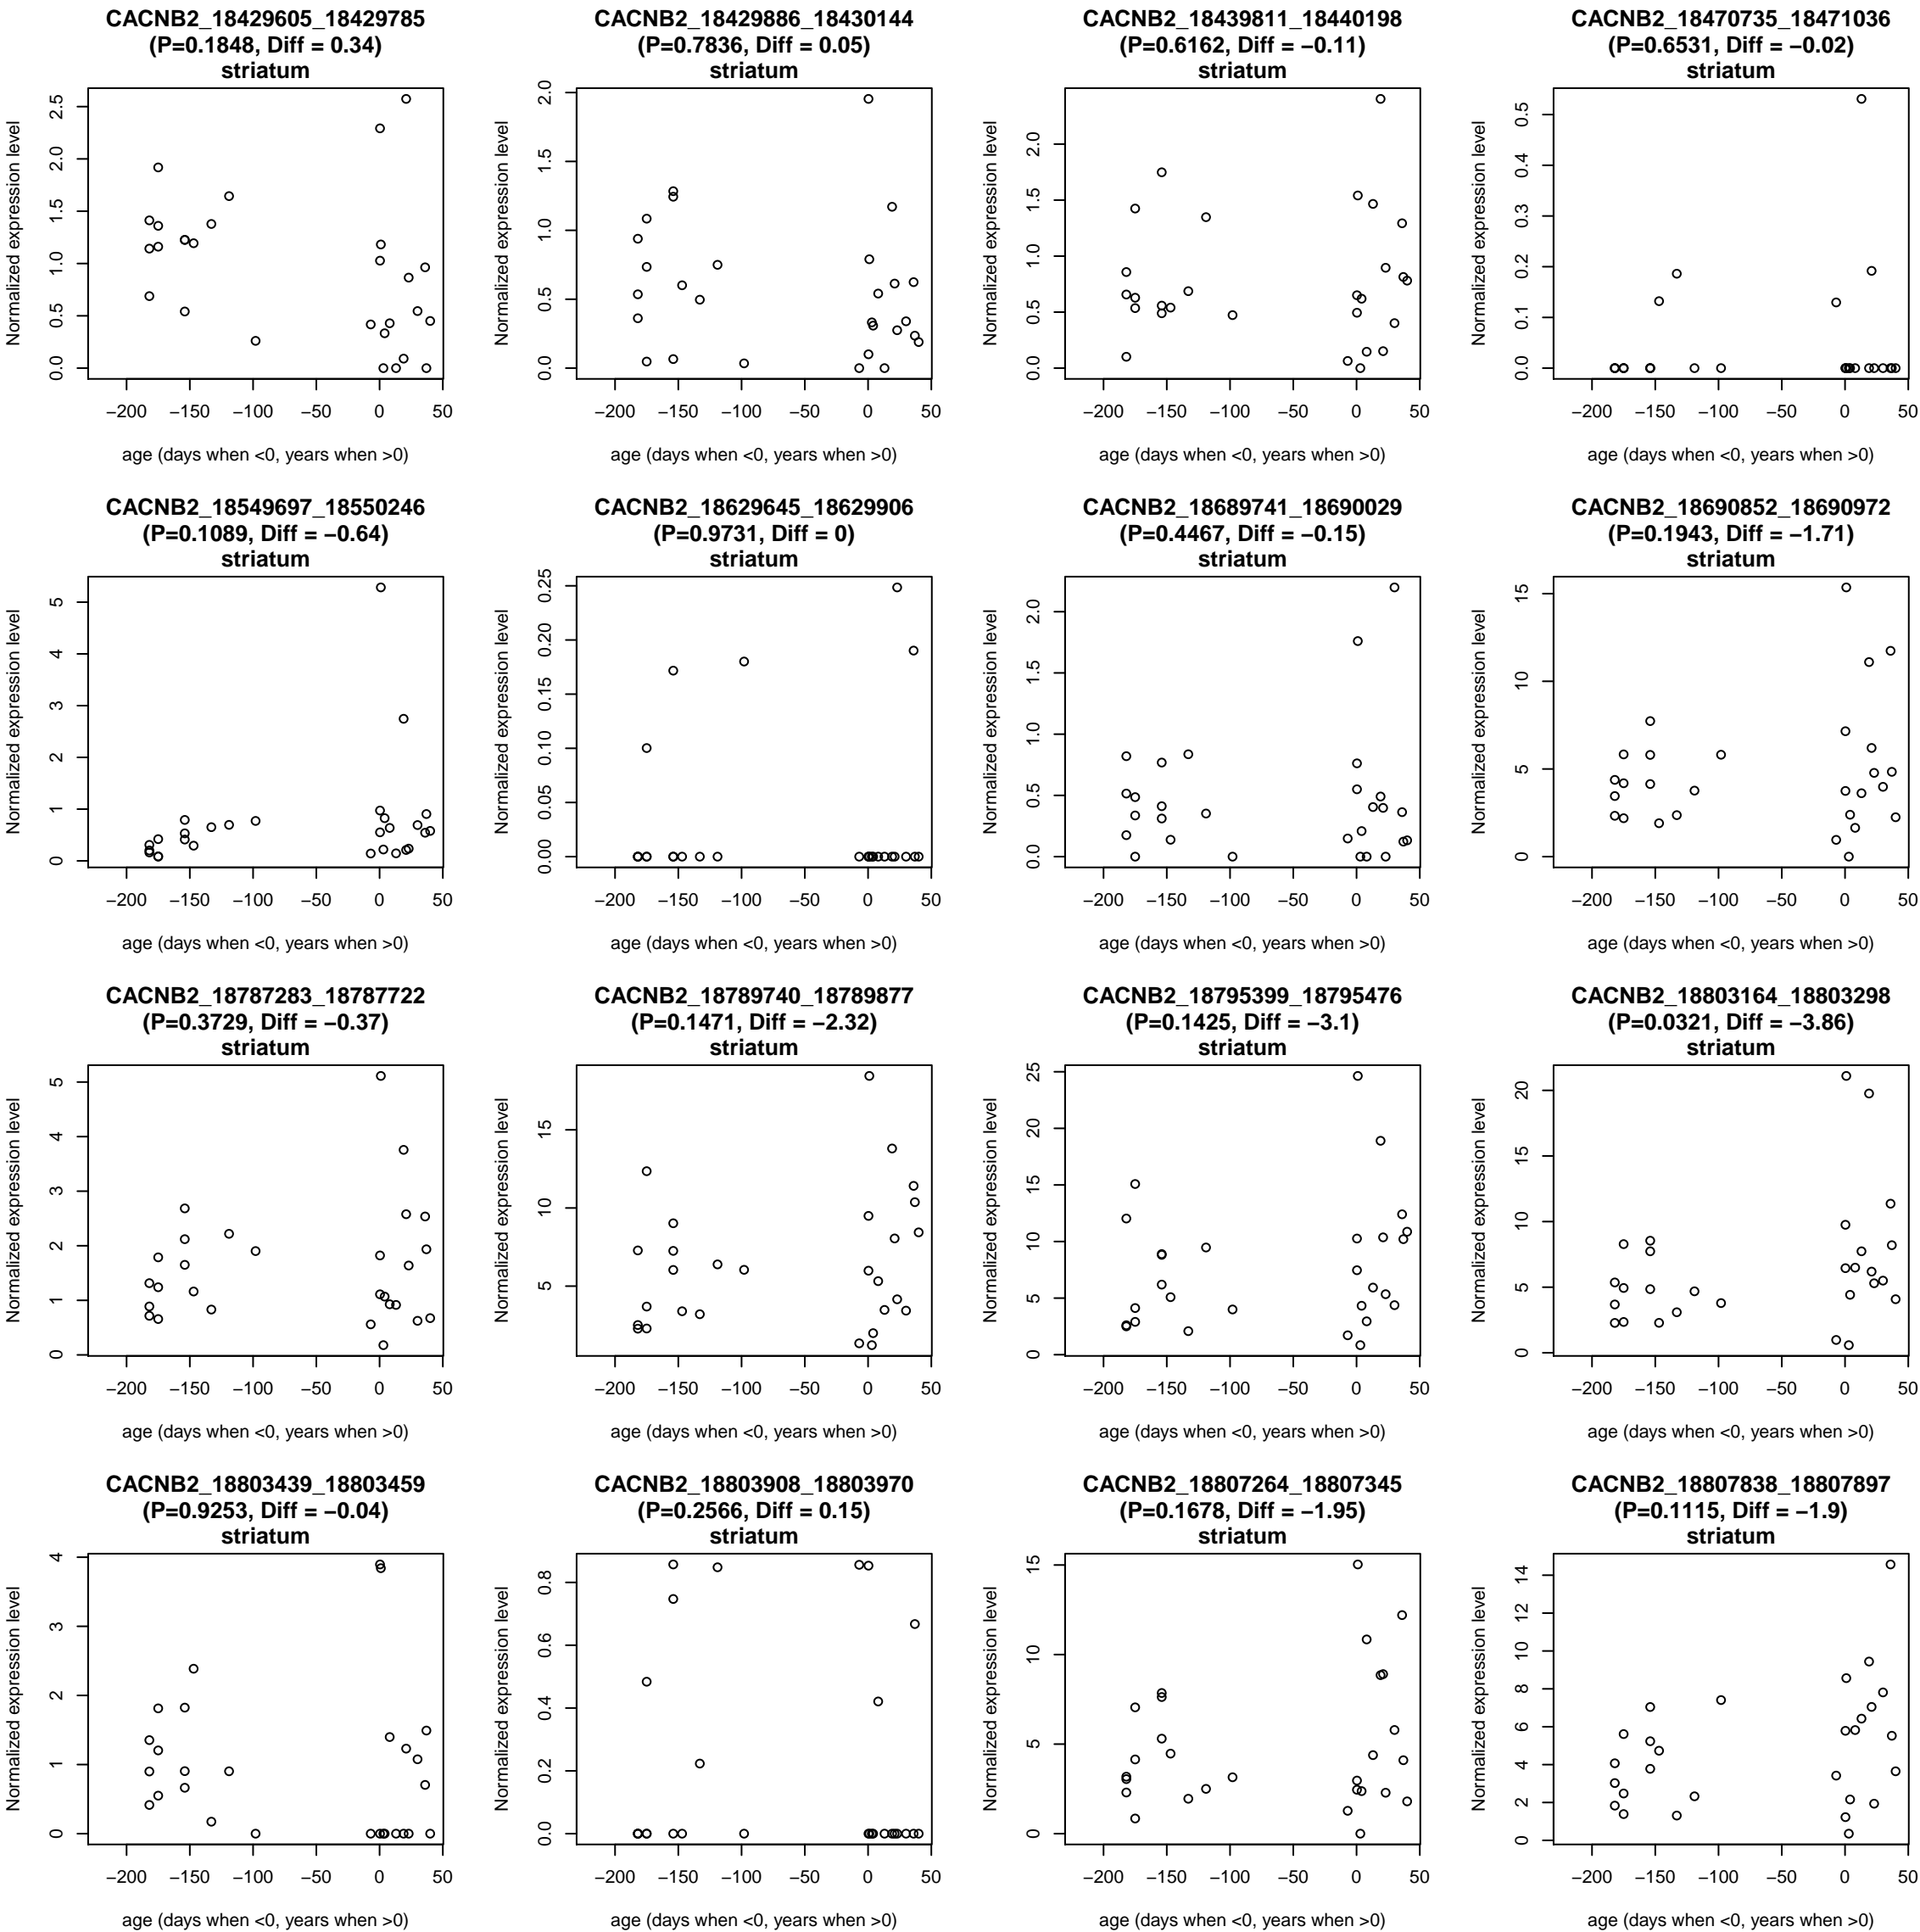

**CACNB2\_18816516\_18816626**  
(P=0.2218, Diff = -2.2)  
striatum

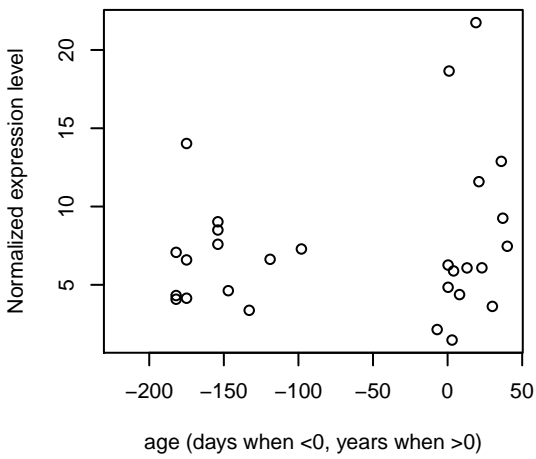

**CACNB2\_18823004\_18823156**  
(P=0.0361, Diff = -3.16)  
striatum

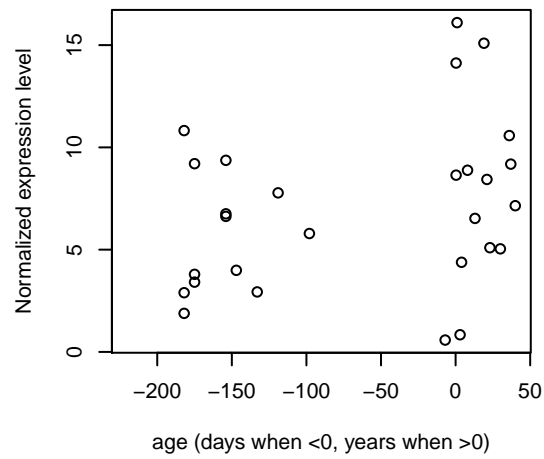

**CACNB2\_18825029\_18825125**  
(P=0.0479, Diff = -3.71)  
striatum

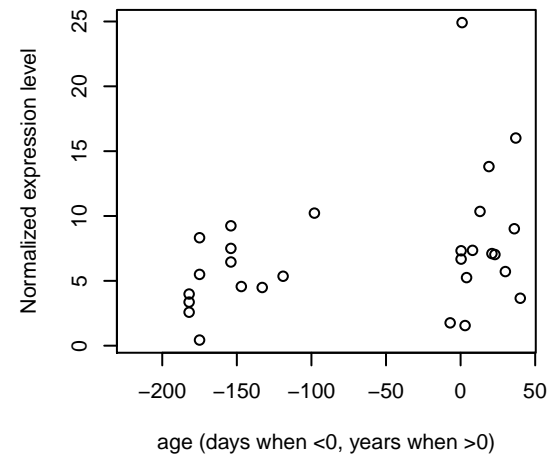

**CACNB2\_18827108\_18827294**  
(P=0.1039, Diff = -3.15)  
striatum

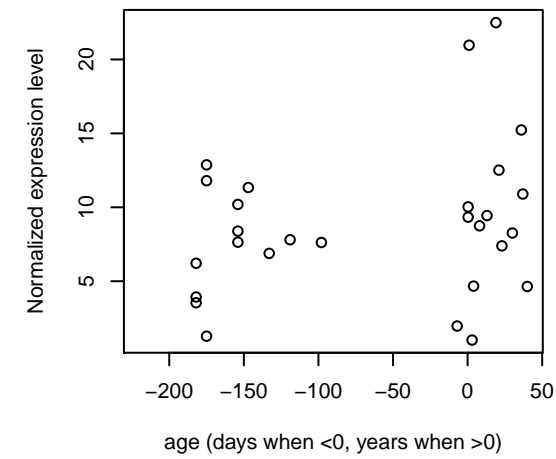

**CACNB2\_18828158\_18830798**  
(P=1e-04, Diff = -4.71)  
striatum

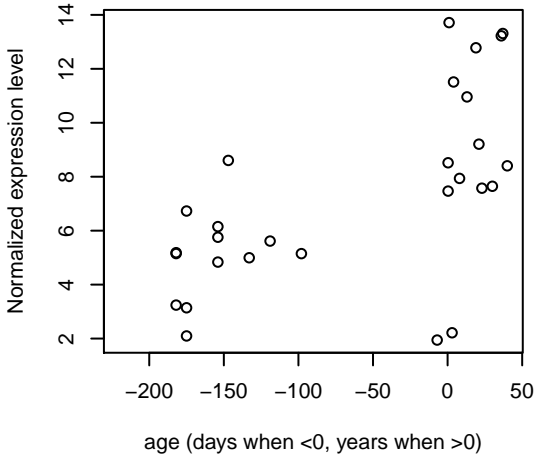

**CTH\_70876900\_70877266**  
(P=0.0319, Diff = 0.79)  
striatum

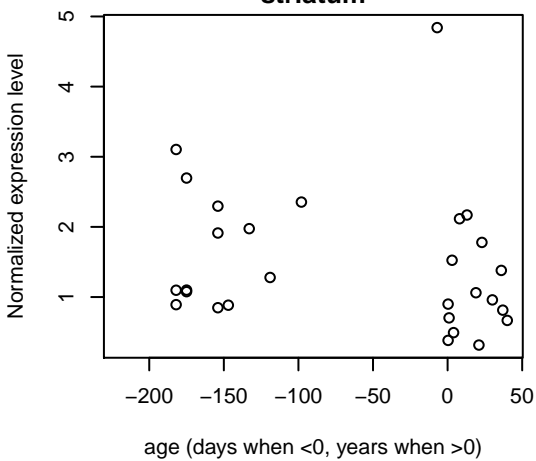

**CTH\_70881638\_70881720**  
(P=0.5972, Diff = 0.26)  
striatum

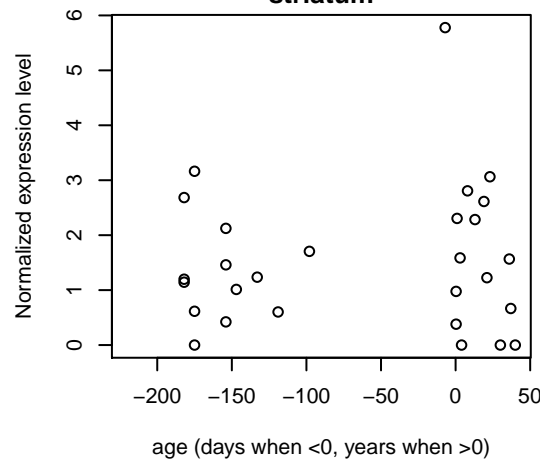

**CTH\_70883619\_70883715**  
(P=0.3507, Diff = 0.48)  
striatum

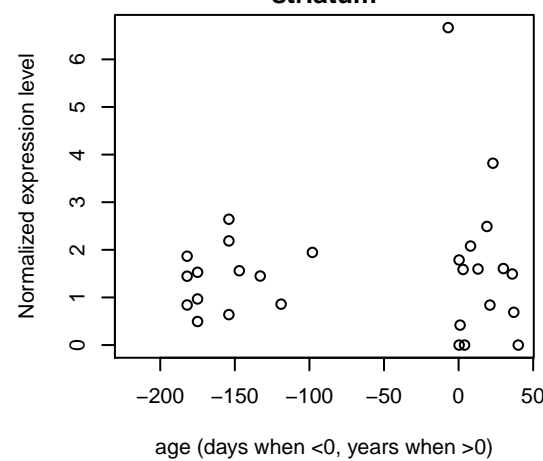

**CTH\_70887248\_70887358**  
(P=0.439, Diff = 0.38)  
striatum

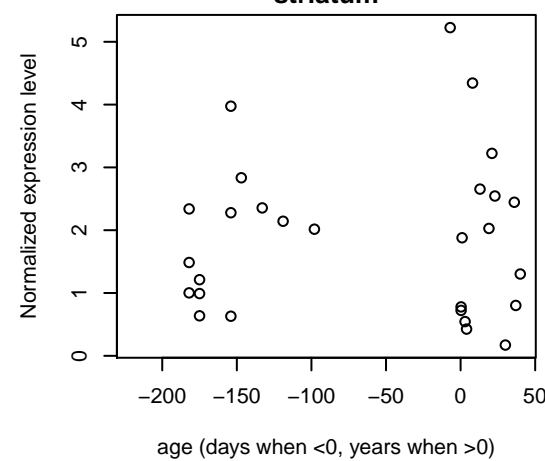

**CTH\_70889967\_70890099**  
(P=0.4909, Diff = 0.41)  
striatum

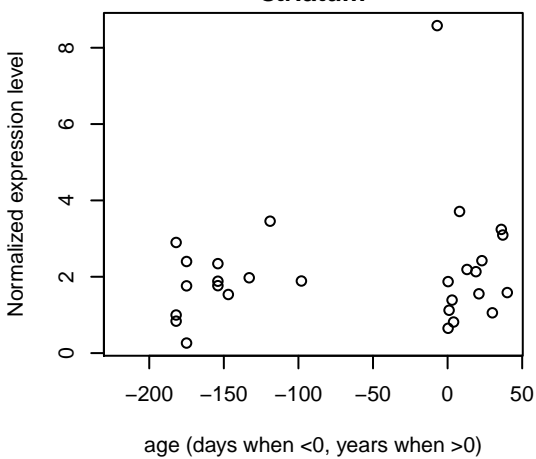

**CTH\_70895476\_70895534**  
(P=0.4021, Diff = 0.52)  
striatum

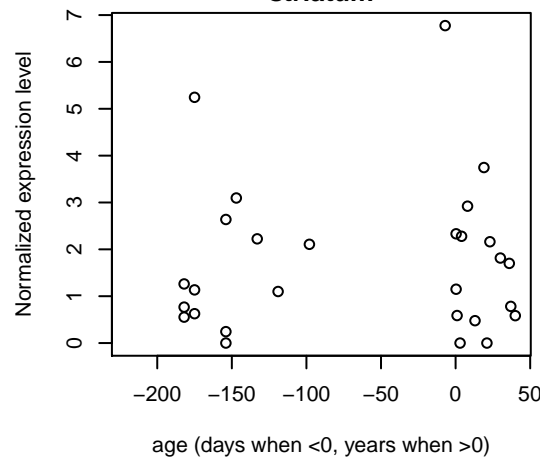

**CTH\_70895999\_70896077**  
(P=0.8406, Diff = 0.08)  
striatum

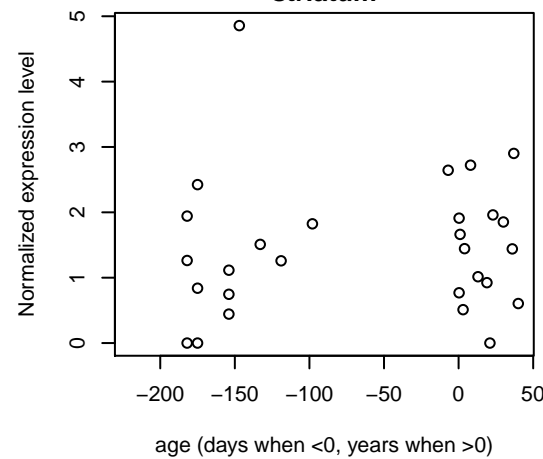

**CTH\_70897765\_70897918**  
(P=0.6044, Diff = 0.25)  
striatum

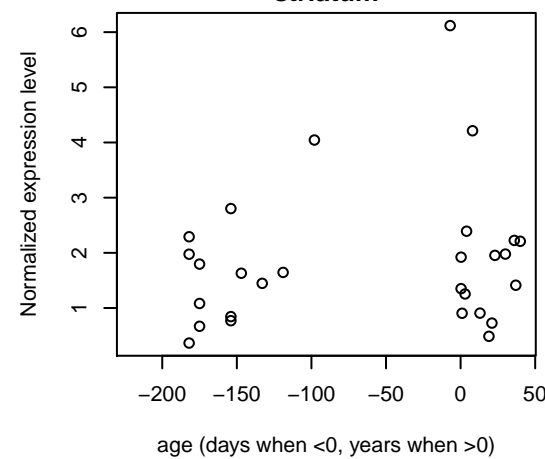

**CTH\_70899510\_70899632**  
(P=0.572, Diff = 0.33)  
striatum

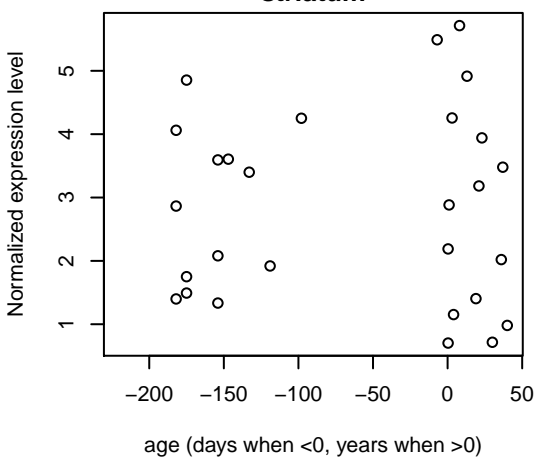

**CTH\_70900533\_70900860**  
(P=0.9418, Diff = -0.01)  
striatum

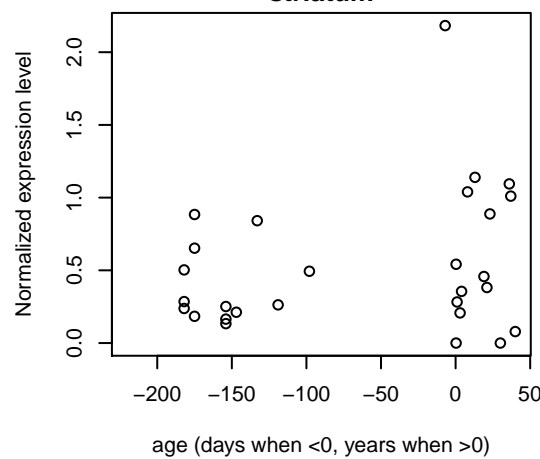

**CTH\_70904370\_70904509**  
(P=0.4986, Diff = 0.64)  
striatum

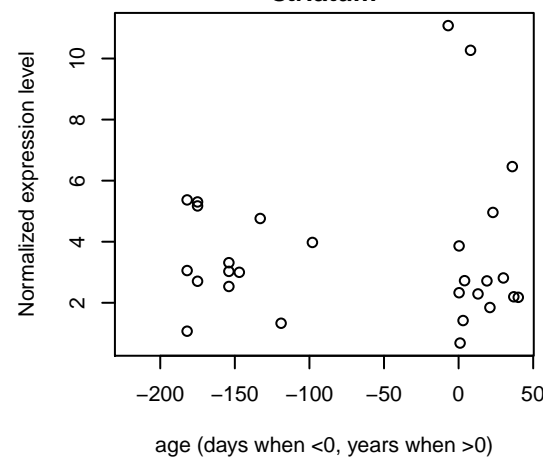

**CTH\_70904783\_70905534**  
(P=0.9603, Diff = -0.01)  
striatum

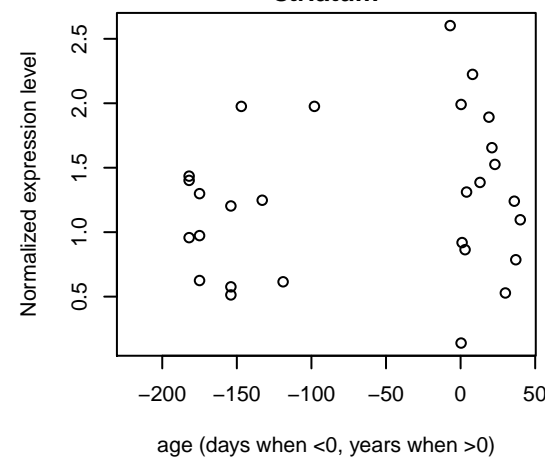

**SEC14L5\_5008317\_5008446**  
( $P=0.0012$ , Diff =  $-1.74$ )  
striatum

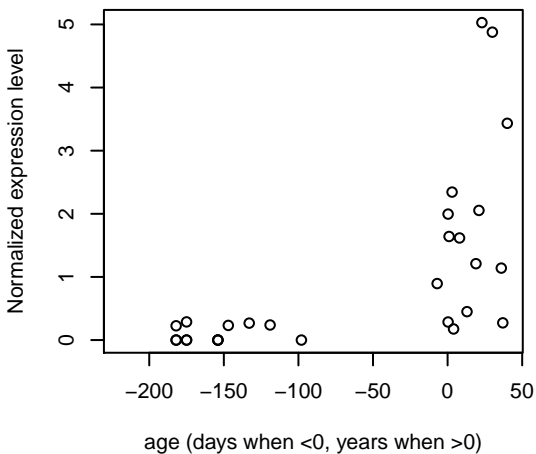

**SEC14L5\_5009273\_5009387**  
( $P=0$ , Diff =  $-6.34$ )  
striatum

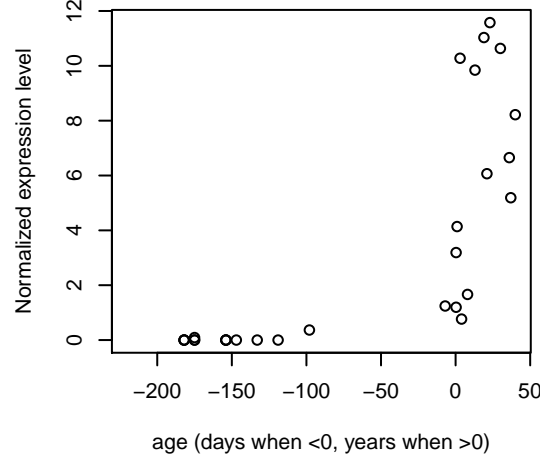

**SEC14L5\_5037557\_5037707**  
( $P=6e-04$ , Diff =  $-2.8$ )  
striatum

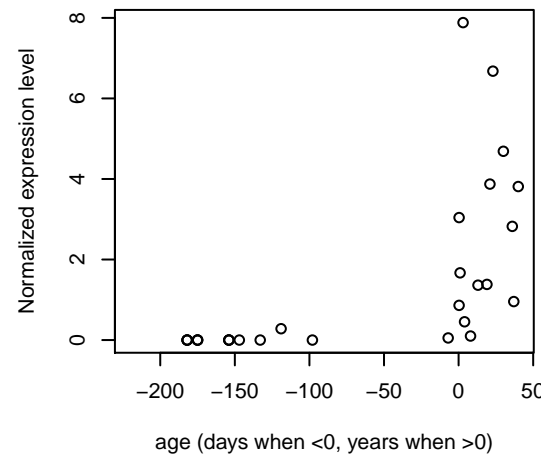

**SEC14L5\_5038149\_5038281**  
( $P=2e-04$ , Diff =  $-9.31$ )  
striatum

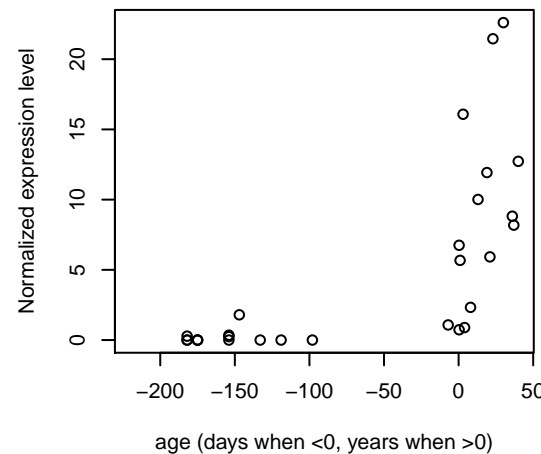

**SEC14L5\_5040767\_5040896**  
( $P=1e-04$ , Diff =  $-8.78$ )  
striatum

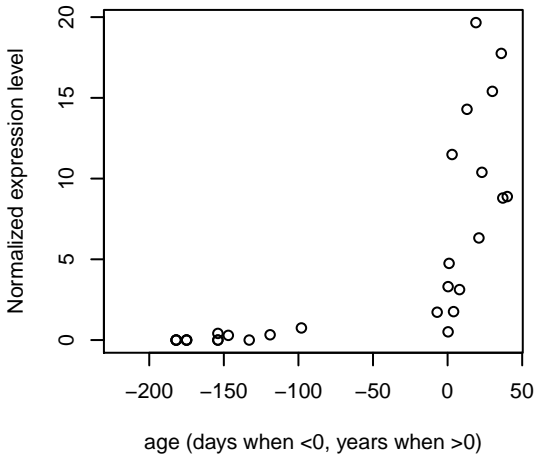

**SEC14L5\_5041838\_5042031**  
( $P=0$ , Diff =  $-7.4$ )  
striatum

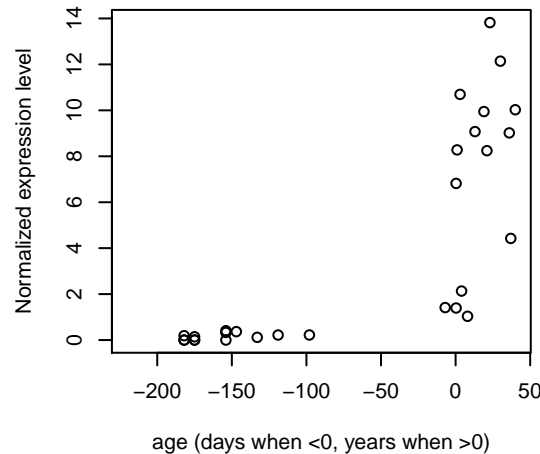

**SEC14L5\_5046348\_5046461**  
( $P=0$ , Diff =  $-7.42$ )  
striatum

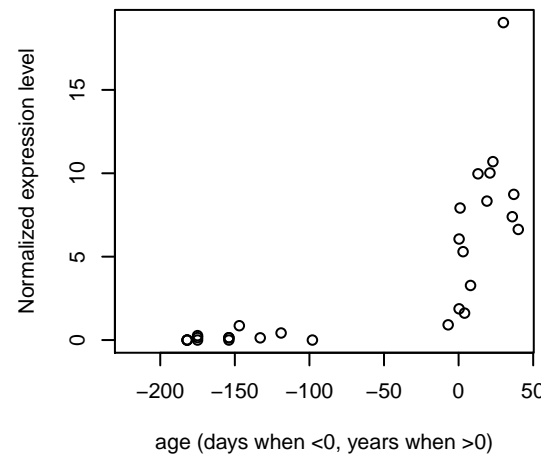

**SEC14L5\_5046855\_5047045**  
( $P=0$ , Diff =  $-7.89$ )  
striatum

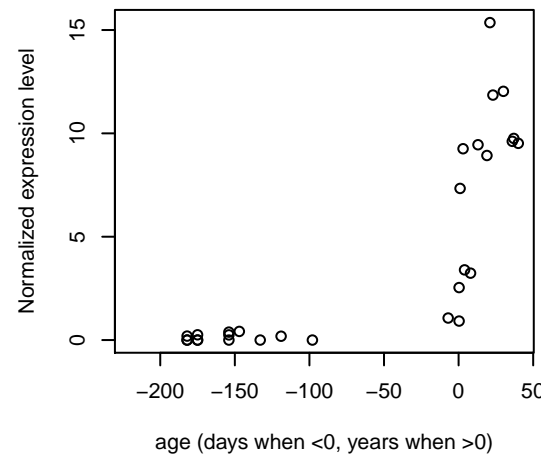

**SEC14L5\_5050655\_5050744**  
( $P=0$ , Diff =  $-6.3$ )  
striatum

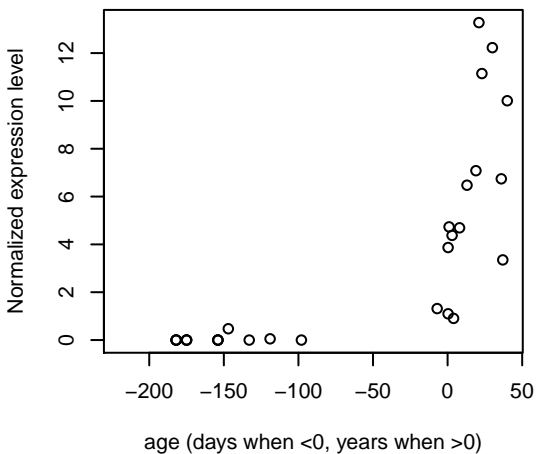

**SEC14L5\_5050855\_5050926**  
( $P=1e-04$ , Diff =  $-8.03$ )  
striatum

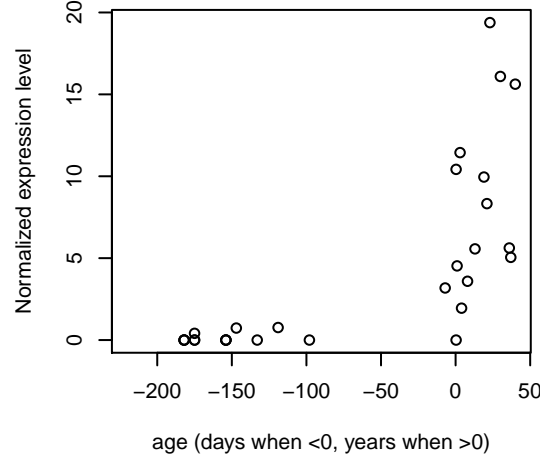

**SEC14L5\_5053402\_5053574**  
( $P=1e-04$ , Diff =  $-7.09$ )  
striatum

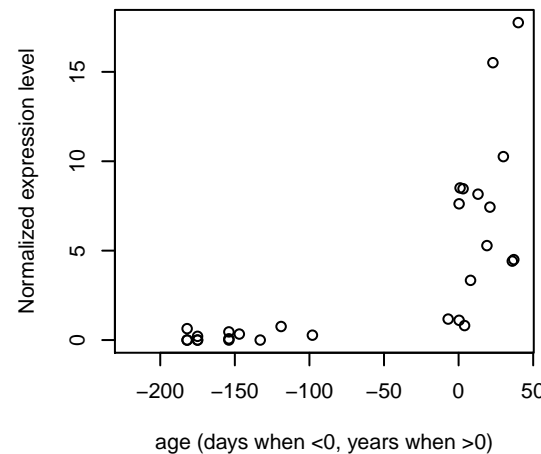

**SEC14L5\_5055914\_5056049**  
( $P=0$ , Diff =  $-8.94$ )  
striatum

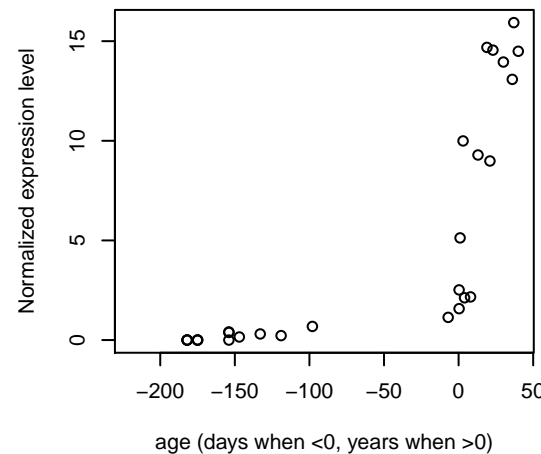

**SEC14L5\_5057352\_5057487**  
( $P=0$ , Diff =  $-8.3$ )  
striatum

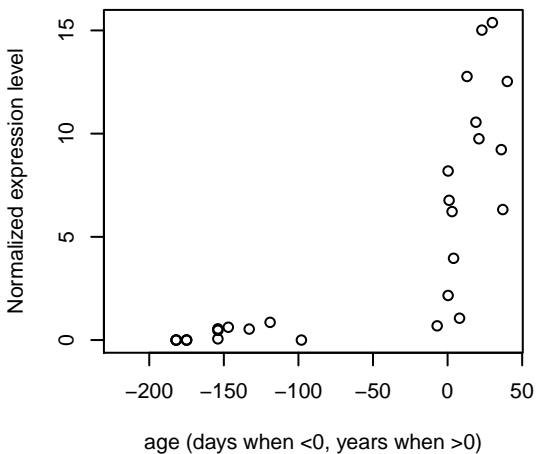

**SEC14L5\_5058421\_5058649**  
( $P=1e-04$ , Diff =  $-4.98$ )  
striatum

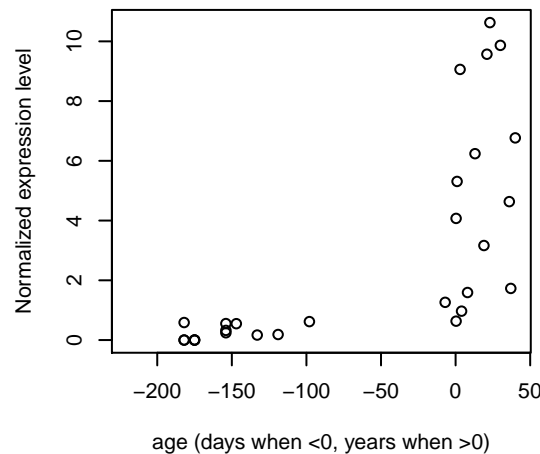

**SEC14L5\_5061095\_5061274**  
( $P=0$ , Diff =  $-7.13$ )  
striatum

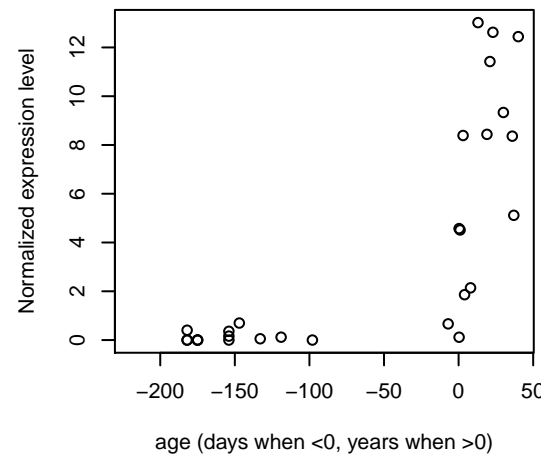

**SEC14L5\_5064859\_5069156**  
( $P=0$ , Diff =  $-18.34$ )  
striatum

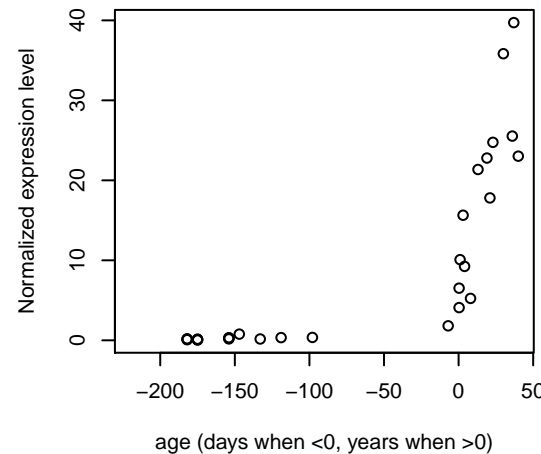



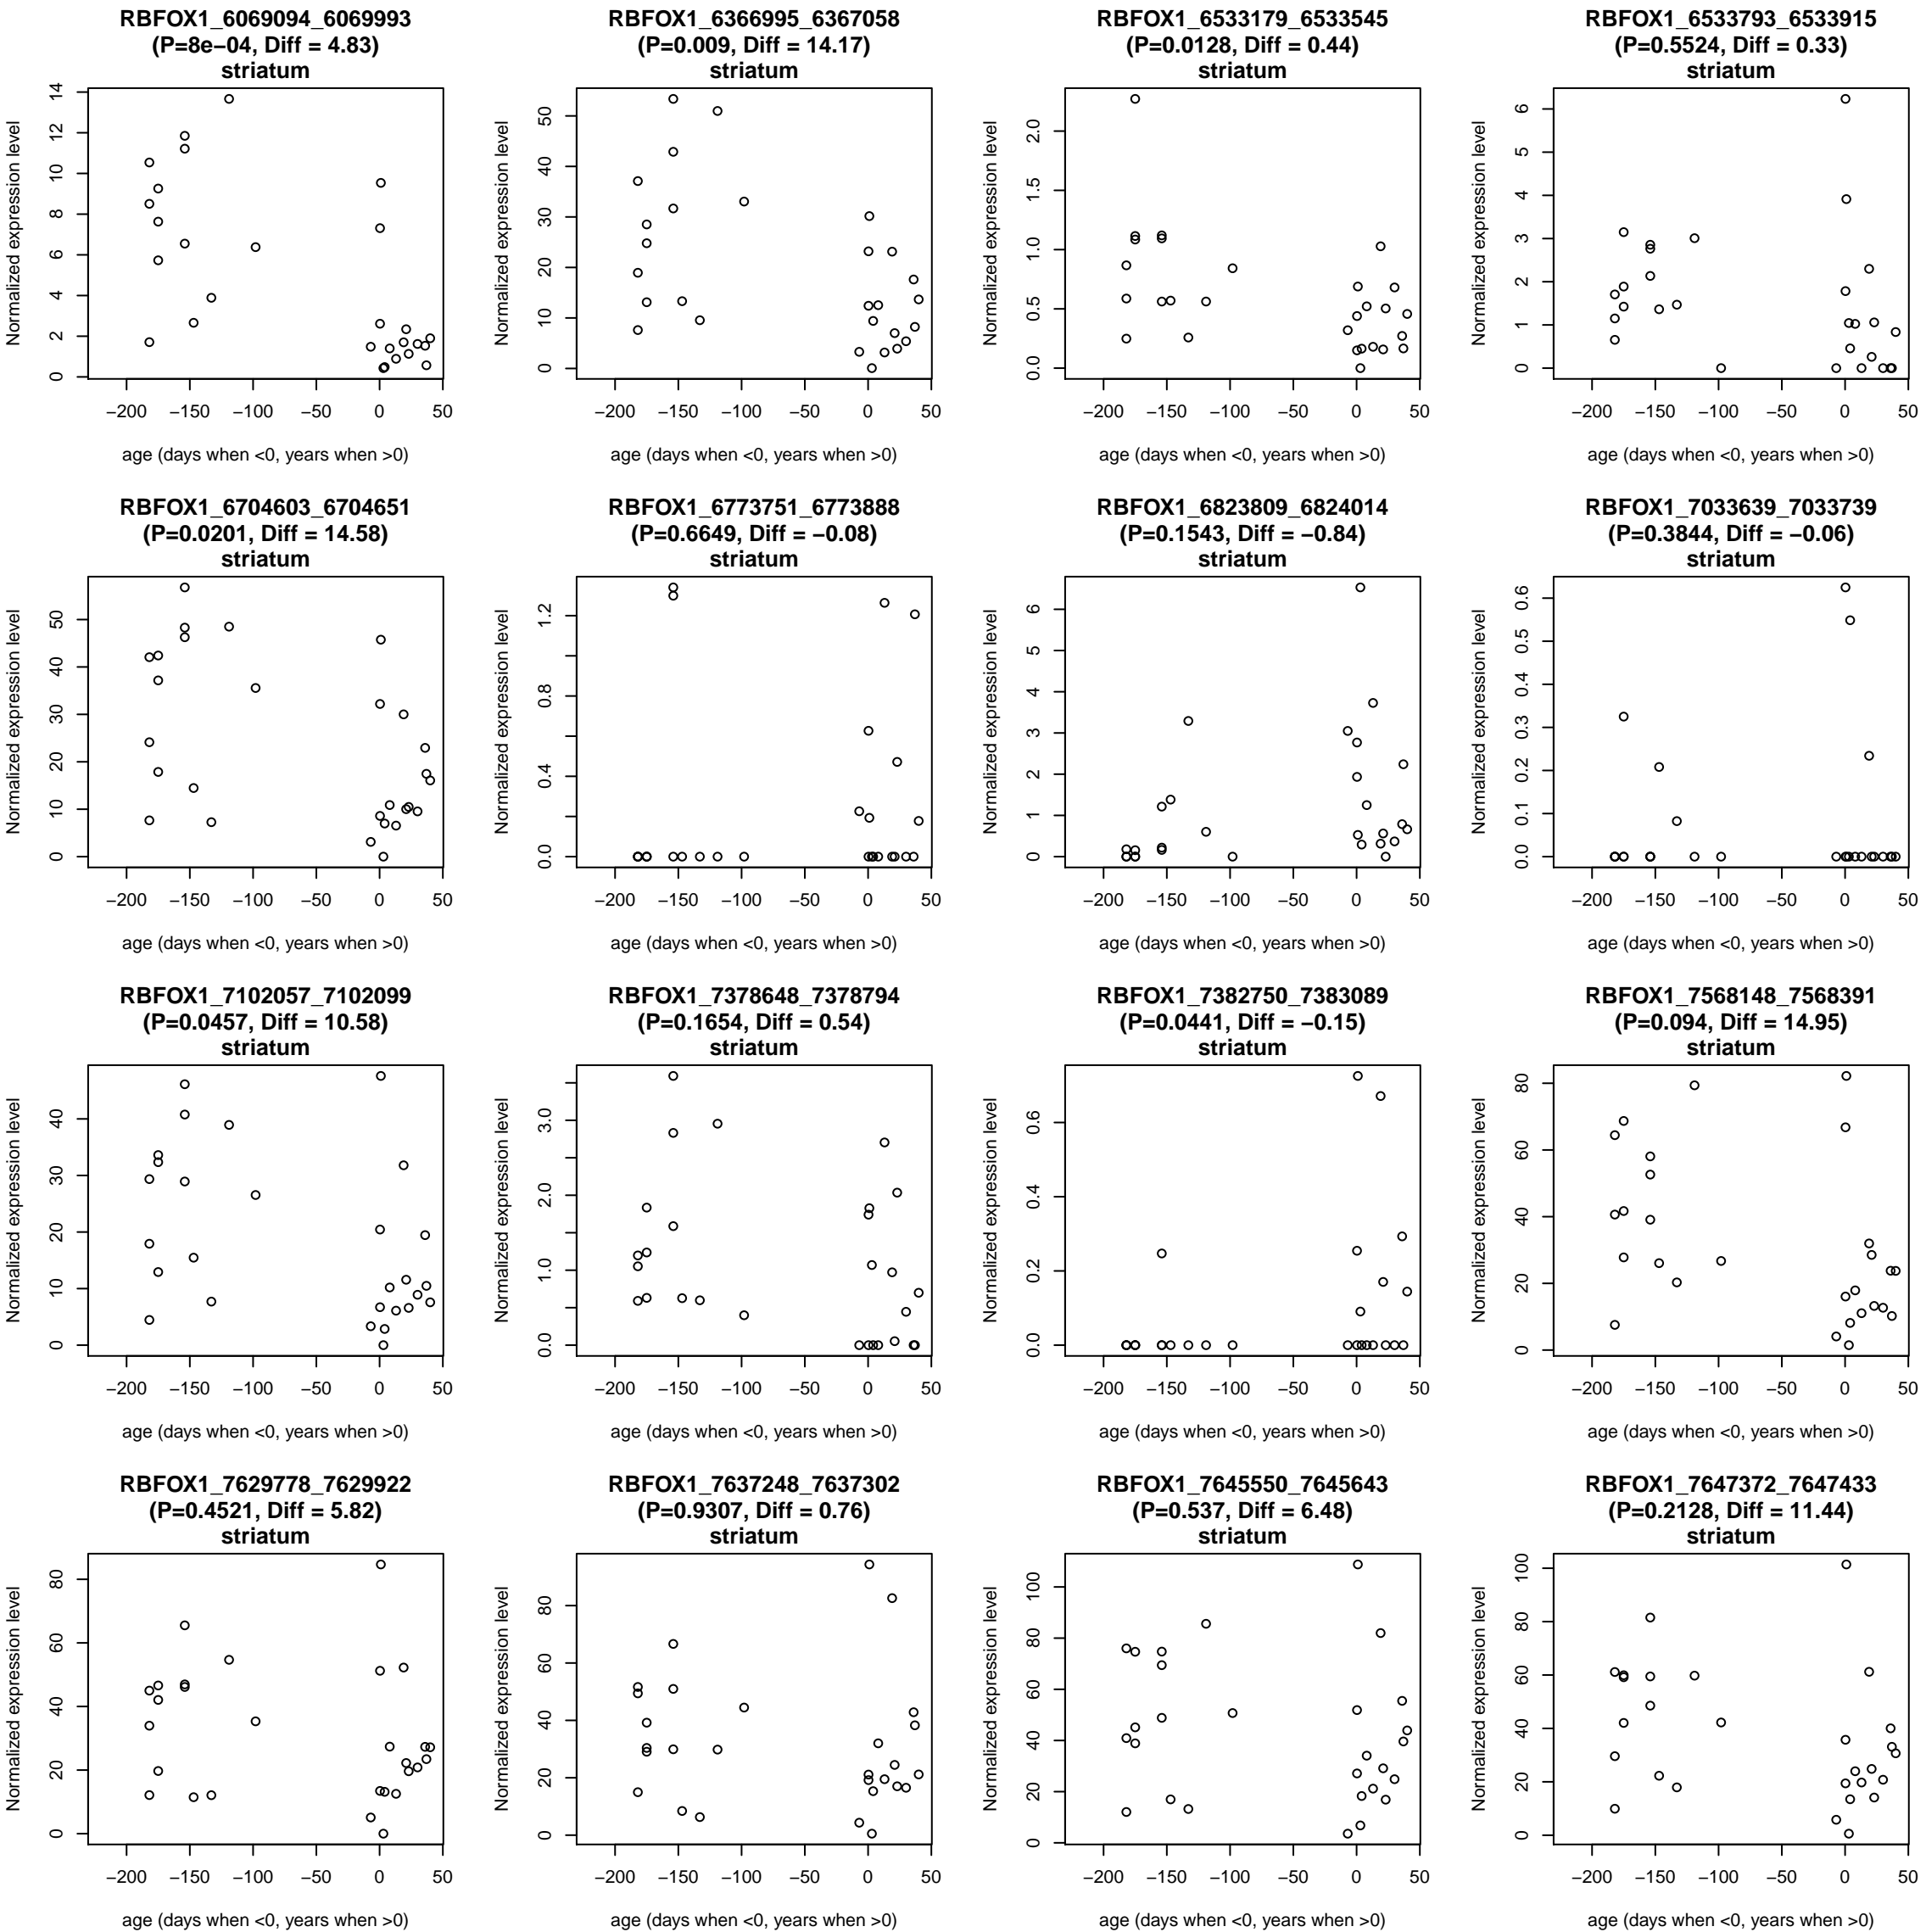

**RBFOX1\_7657286\_7657340**  
(P=0.6661, Diff = 4.74)  
striatum

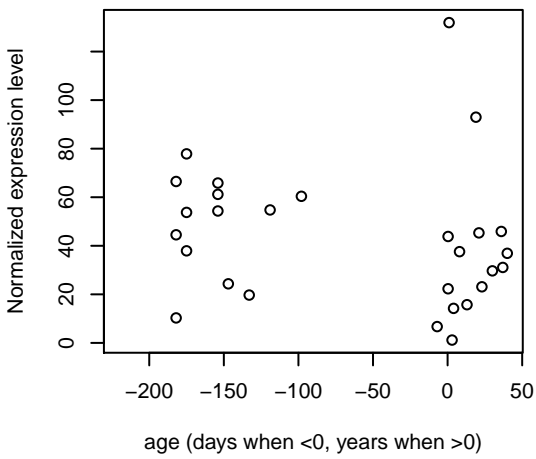

**RBFOX1\_7680604\_7680685**  
(P=0.9977, Diff = 0.03)  
striatum

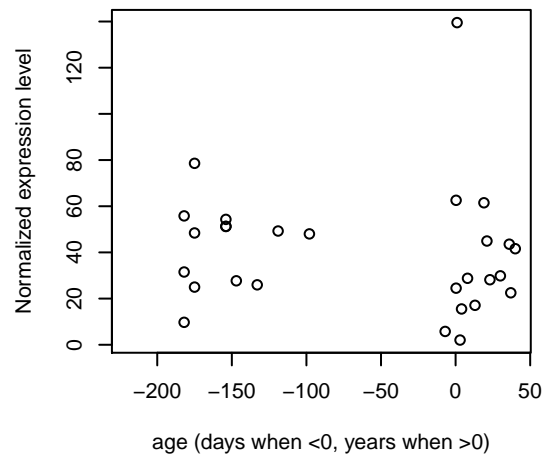

**RBFOX1\_7703816\_7703949**  
(P=0.2423, Diff = 5.51)  
striatum

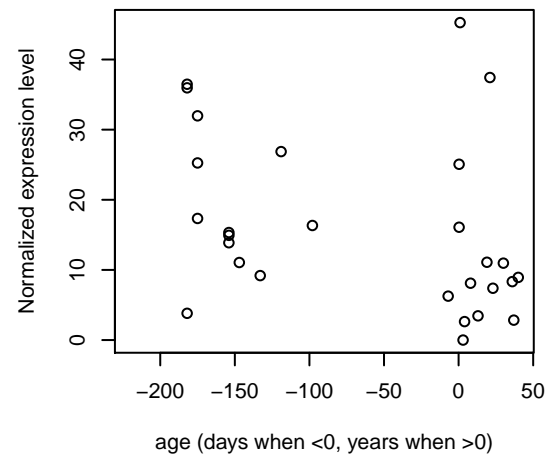

**RBFOX1\_7714930\_7714970**  
(P=0.4919, Diff = 3.8)  
striatum

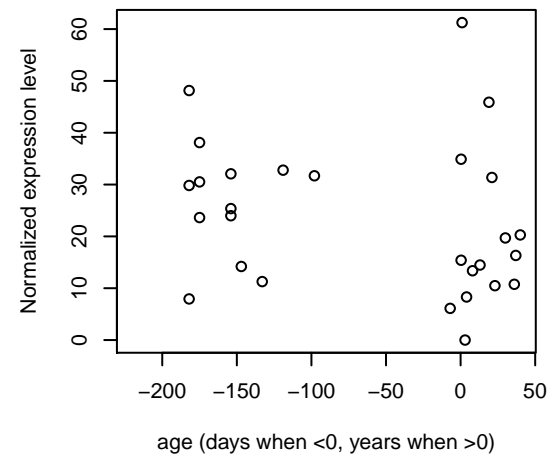

**RBFOX1\_7721558\_7721601**  
(P=0.1431, Diff = -0.94)  
striatum

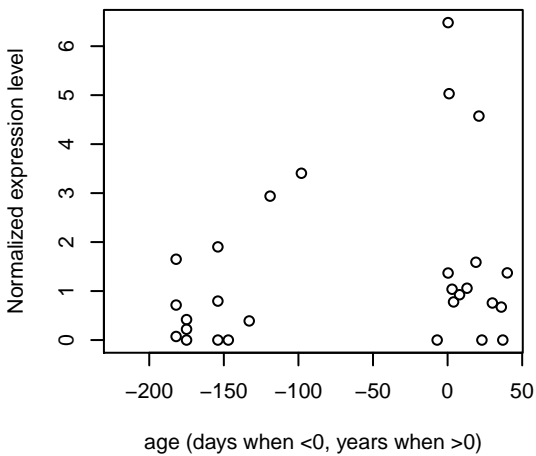

**RBFOX1\_7726775\_7726840**  
(P=0.2755, Diff = 9.8)  
striatum

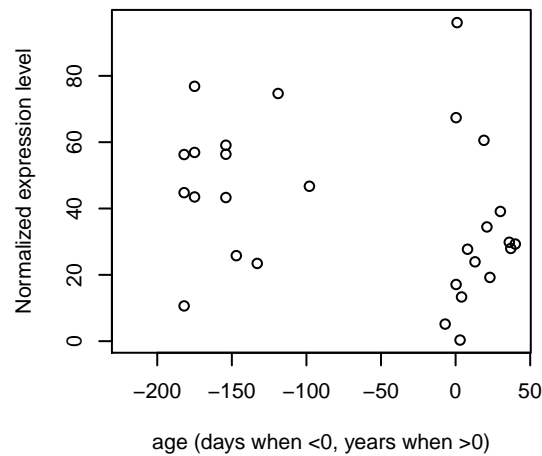

**RBFOX1\_7743316\_7743369**  
(P=0.3328, Diff = -4.79)  
striatum

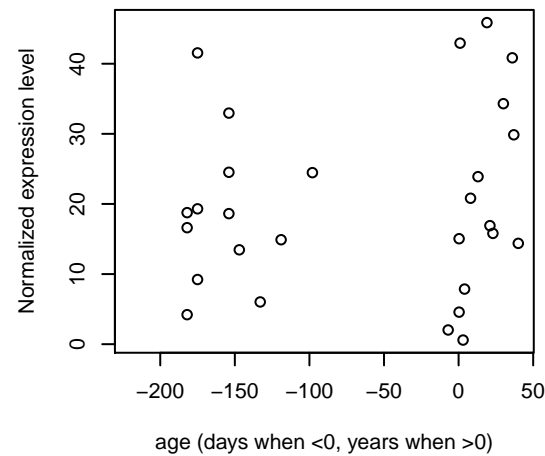

**RBFOX1\_7759057\_7759133**  
(P=0.616, Diff = 4.69)  
striatum

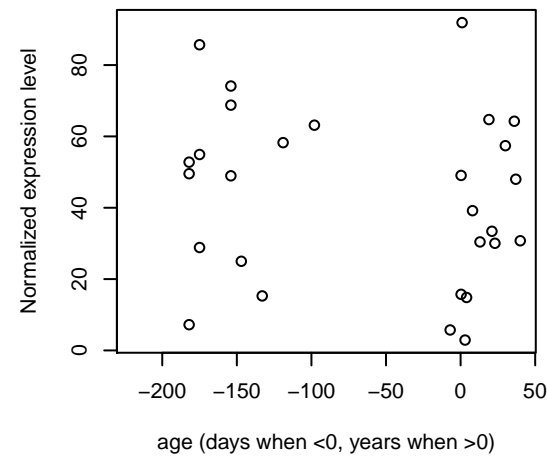

**RBFOX1\_7759495\_7763340**  
(P=0.135, Diff = -9.32)  
striatum

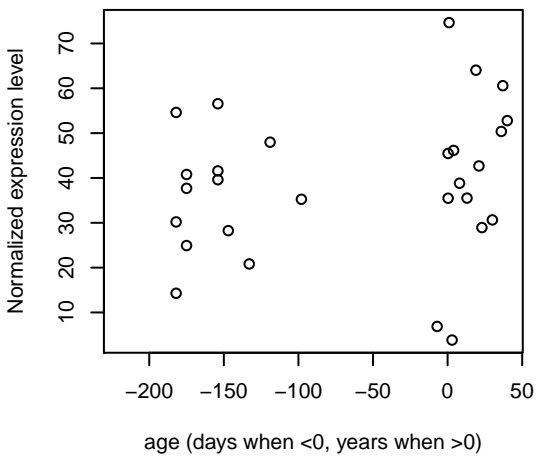

**TBX4\_59529778\_59529938**  
(P=NaN, Diff = 0)  
striatum

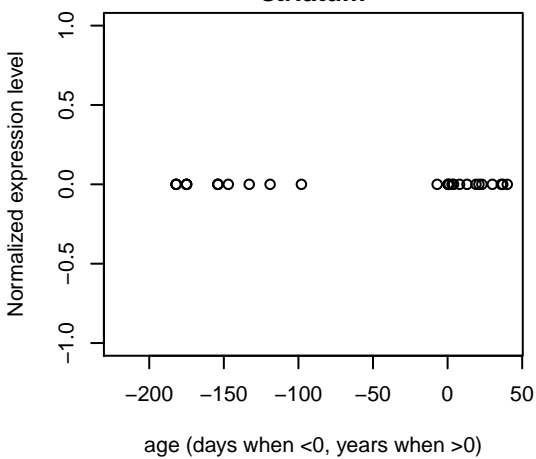

**TBX4\_59533806\_59534037**  
(P=NaN, Diff = 0)  
striatum

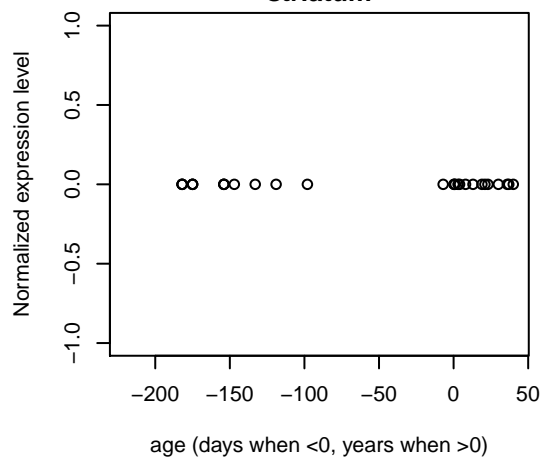

**TBX4\_59534897\_59534992**  
(P=0.1675, Diff = -0.07)  
striatum

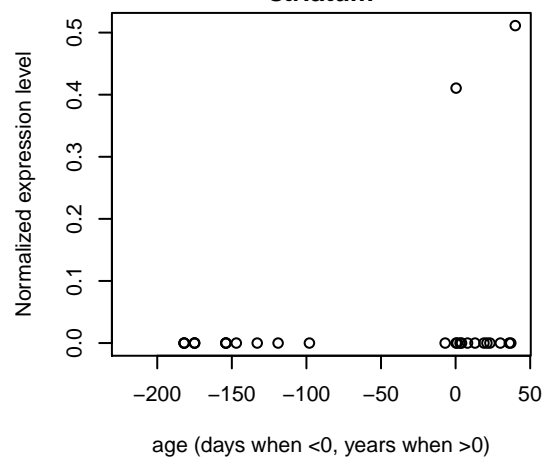

**TBX4\_59543179\_59543299**  
(P=0.3356, Diff = -0.01)  
striatum

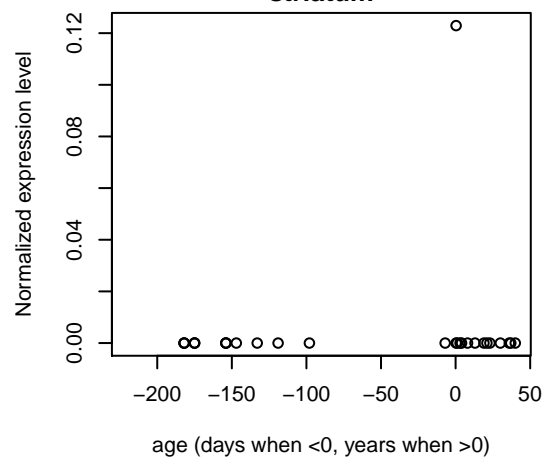

**TBX4\_59544870\_59545018**  
(P=NaN, Diff = 0)  
striatum

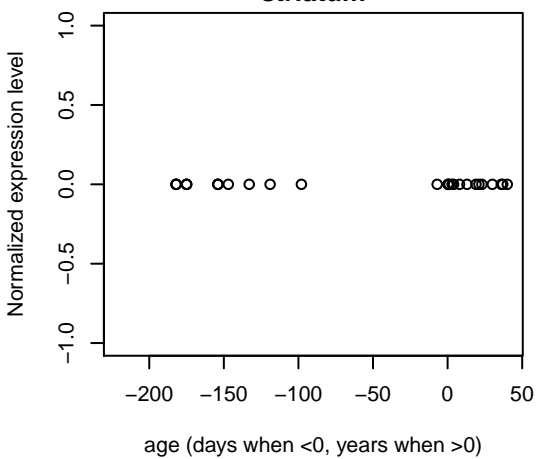

**TBX4\_59555987\_59556140**  
(P=0.1745, Diff = -0.09)  
striatum

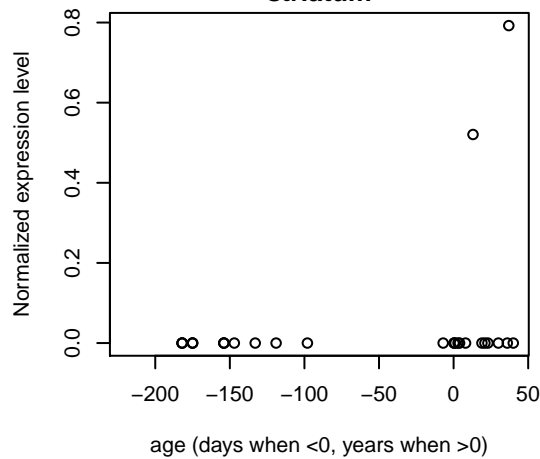

**TBX4\_59557241\_59557330**  
(P=NaN, Diff = 0)  
striatum

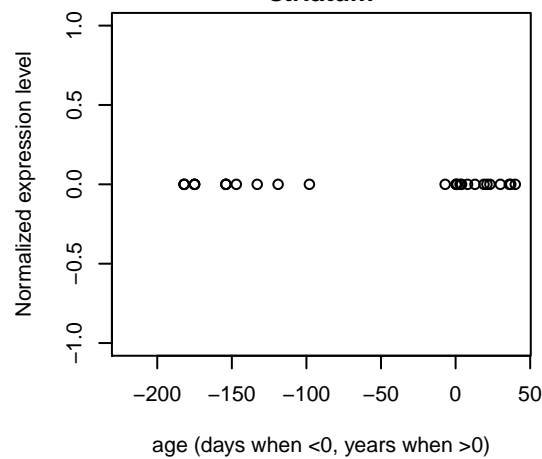

**TBX4\_59557450\_59557680**  
(P=NaN, Diff = 0)  
striatum

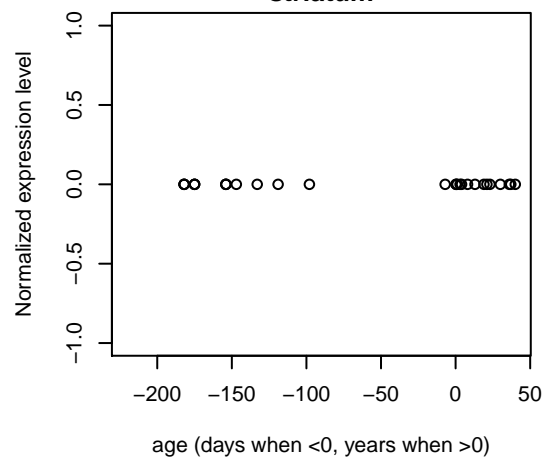

**TBX4\_59560257\_59562469**  
(P=0.2292, Diff = 0)  
striatum

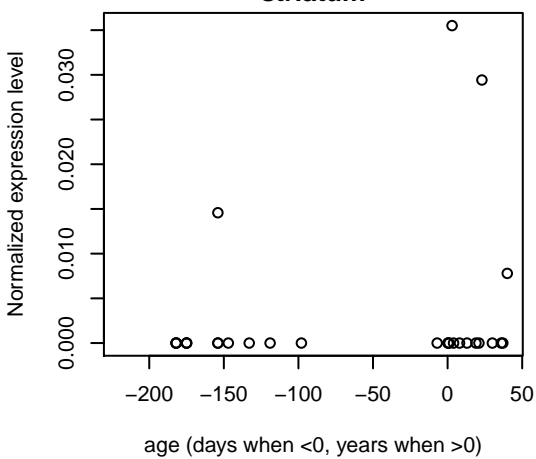

**FRG1\_190861942\_190862226**  
(P=1e-04, Diff = 7.26)  
striatum

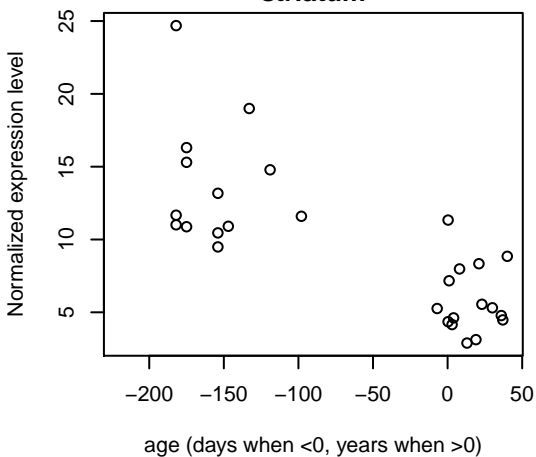

**FRG1\_190862987\_190863159**  
(P=0.9356, Diff = 0)  
striatum

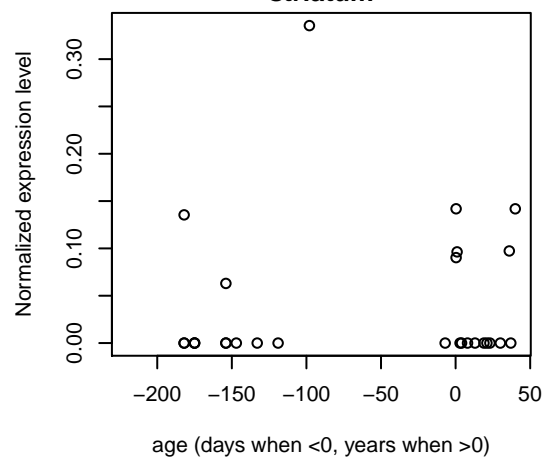

**FRG1\_190864356\_190864427**  
(P=0.0049, Diff = 6.28)  
striatum

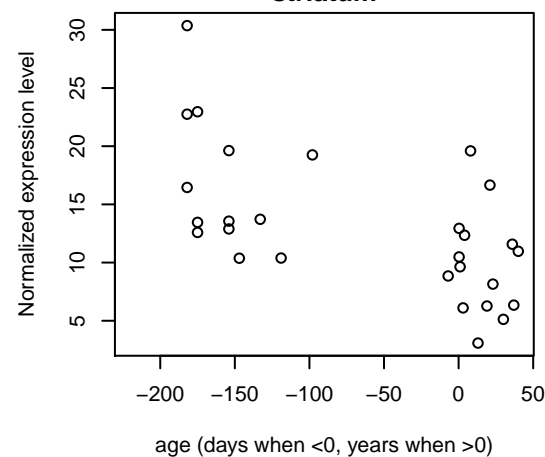

**FRG1\_190873316\_190873442**  
(P=0.0036, Diff = 16.09)  
striatum

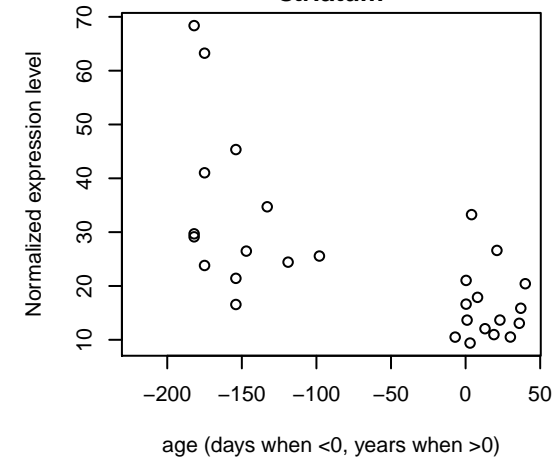

**FRG1\_190874222\_190874280**  
(P=0.0175, Diff = 8.08)  
striatum

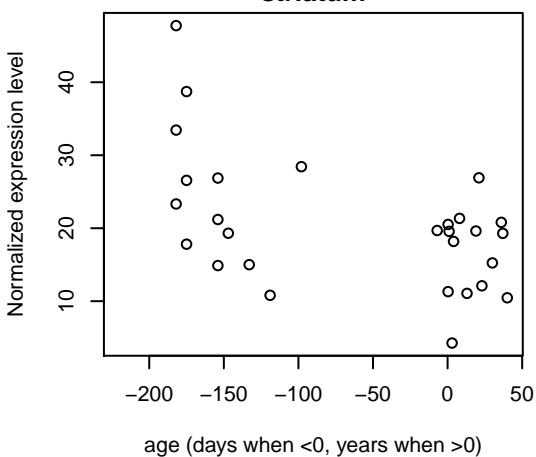

**FRG1\_190876191\_190876306**  
(P=0.0594, Diff = 6.77)  
striatum

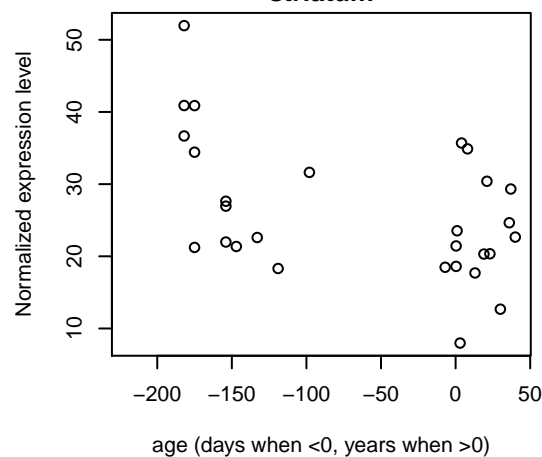

**FRG1\_190878552\_190878657**  
(P=0.5749, Diff = 0.99)  
striatum

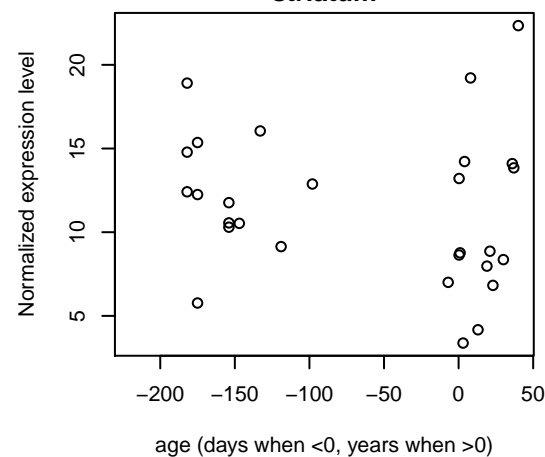

**FRG1\_190881902\_190881994**  
(P=0.3721, Diff = 1.58)  
striatum

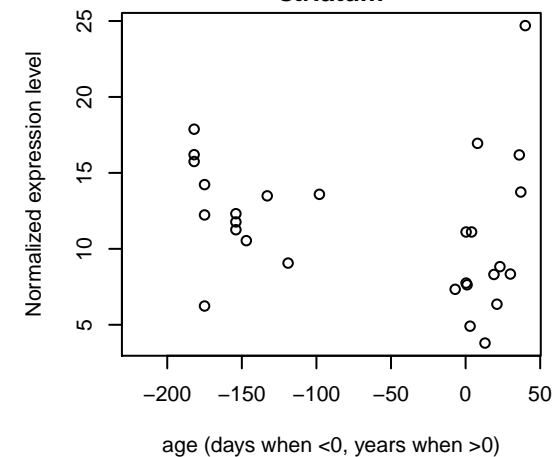

**FRG1\_190882016\_190882355**  
(P=0.885, Diff = 0.03)  
striatum

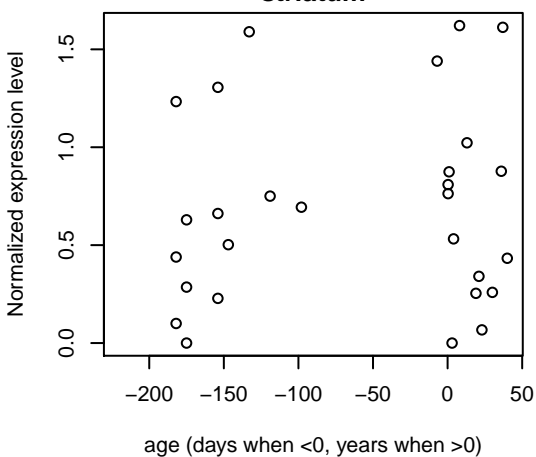

**FRG1\_190882583\_190882705**  
(P=0.4755, Diff = -0.06)  
striatum

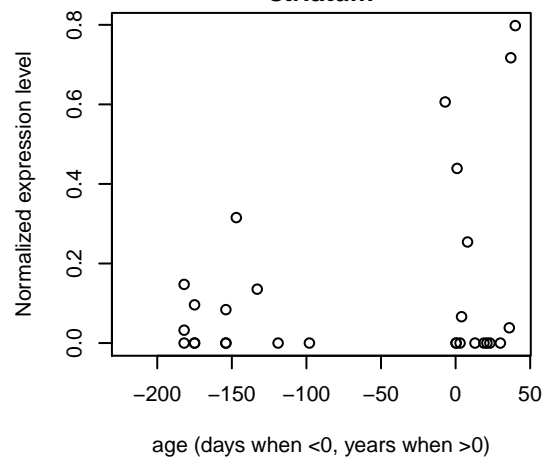

**FRG1\_190882976\_190883087**  
(P=0.0189, Diff = 14.76)  
striatum

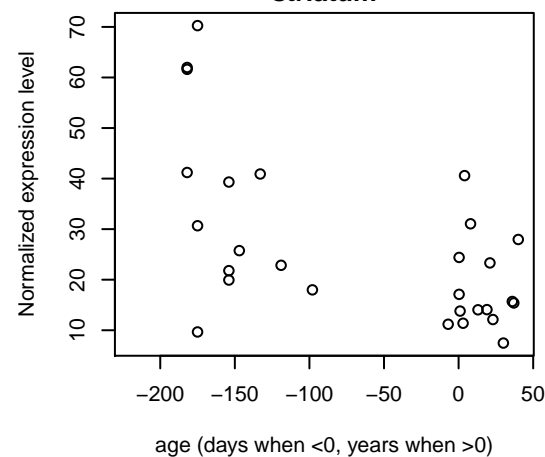

**FRG1\_190884247\_190884359**  
(P=0.0209, Diff = 7.21)  
striatum

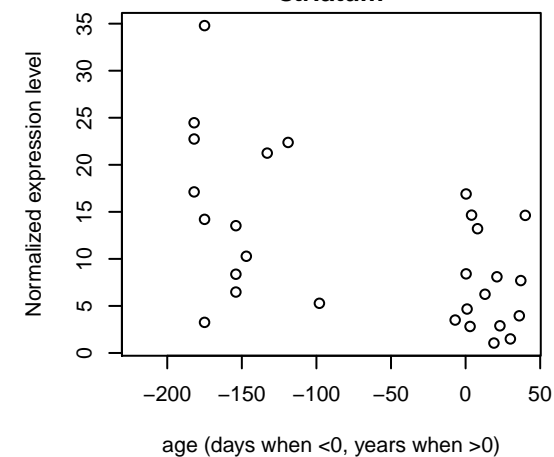

**METTL4\_2537523\_2539144**  
(P=0.0114, Diff = -1.1)  
striatum

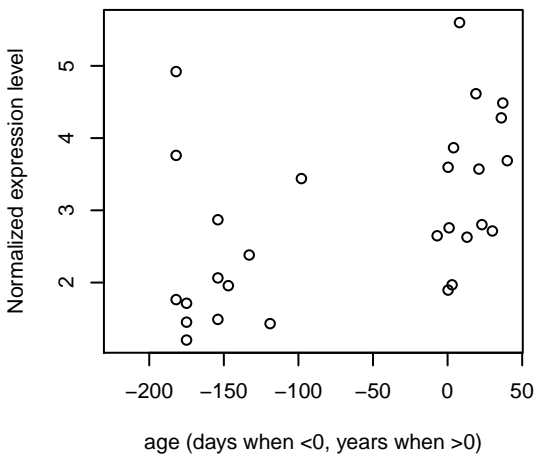

**METTL4\_2544193\_2544285**  
(P=0.4264, Diff = -0.55)  
striatum

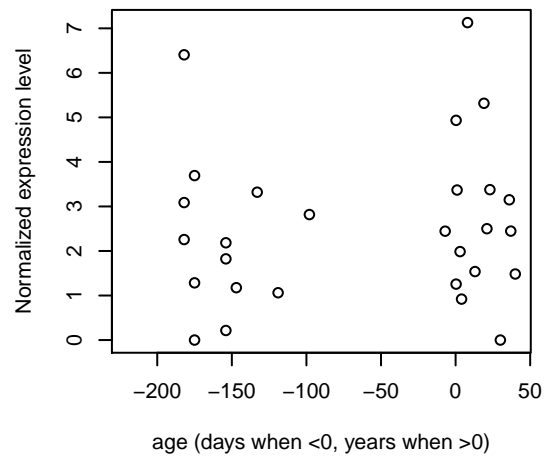

**METTL4\_2544651\_2544758**  
(P=0.6024, Diff = 0.26)  
striatum

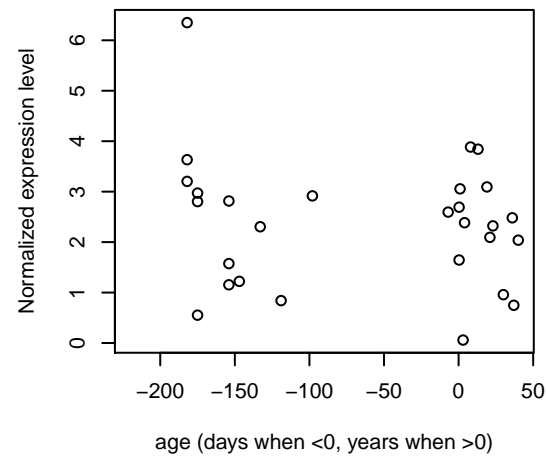

**METTL4\_2547353\_2547528**  
(P=0.3812, Diff = -0.46)  
striatum

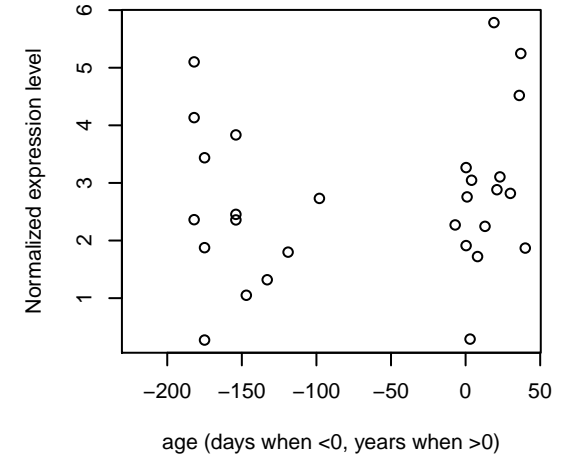

**METTL4\_2552693\_2552763**  
(P=0.6174, Diff = -0.2)  
striatum

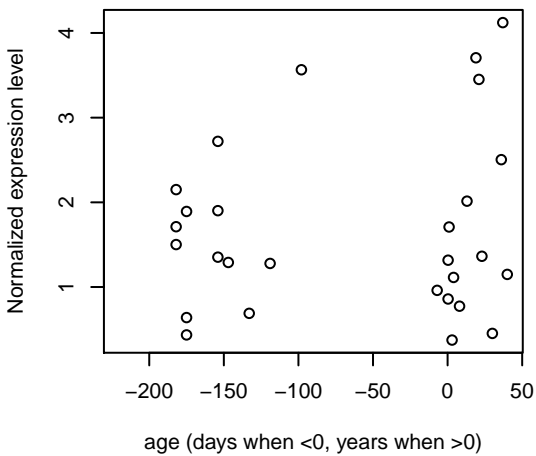

**METTL4\_2554667\_2555037**  
(P=0.0166, Diff = 1.06)  
striatum

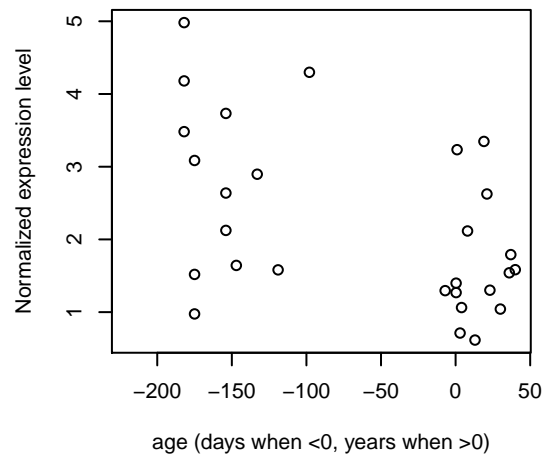

**METTL4\_2563795\_2563858**  
(P=0.3395, Diff = 0.49)  
striatum

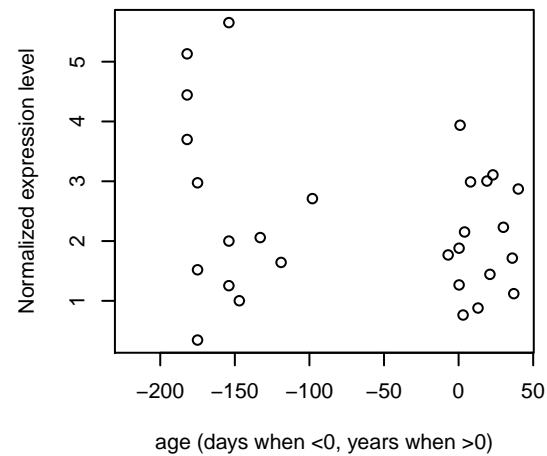

**METTL4\_2566819\_2567653**  
(P=0.0219, Diff = 0.89)  
striatum

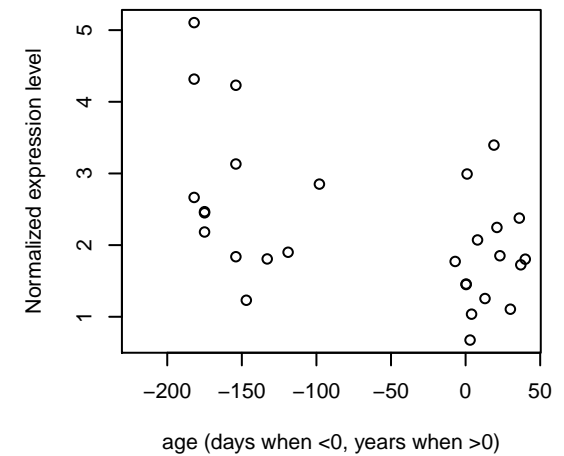

**METTL4\_2571147\_2571508**  
(P=0.3862, Diff = 0.33)  
striatum

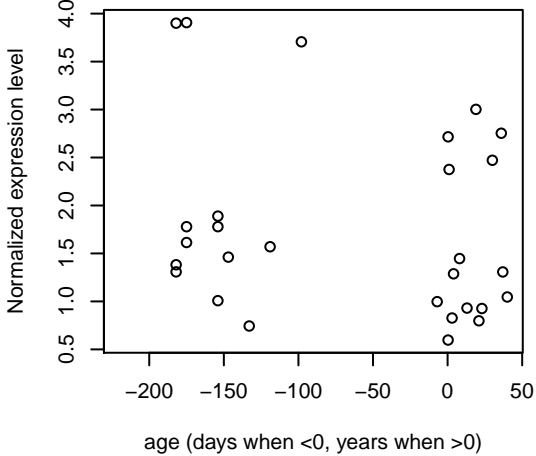

**C7orf11\_40172341\_40172858**  
(P=0.0058, Diff = 7.23)  
striatum

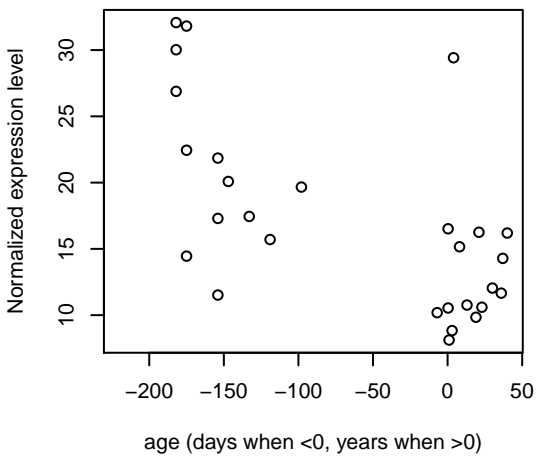

**C7orf11\_40173827\_40174258**  
(P=0.001, Diff = 11.03)  
striatum

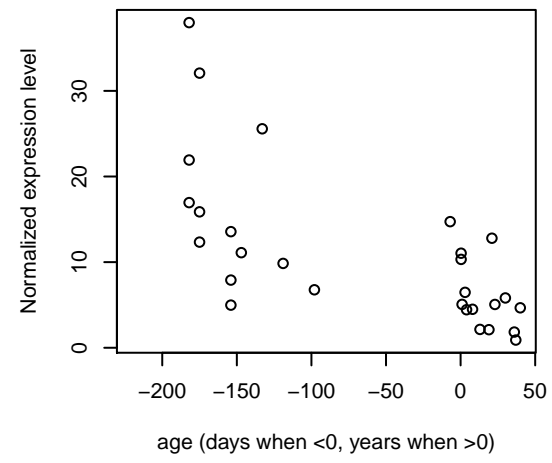

Supplement: tp2017159x4.pdf [file tp2017159x4.pdf]
